# Supplementary material
Source: PubMed Central journal article supplement (PMC4028366)
Supplement: NIHMS545812-supplement-401_2013_1218_MOESM2_ESM.pdf [file NIHMS545812-supplement-401_2013_1218_MOESM2_ESM.pdf]

**Corresponding Author:**  
Javad Nazarian, Children's National Medical Center, Center for Genetic Medicine  
111 Michigan Ave., NW, Washington DC, 20010  
Phone: 202-476-6022 Fax: 202-476-6014  
Email: JNazarian@CNMC.org

Javad Nazarian, Children's National Medical Center, Center for Genetic Medicine
