# Supplementary material
Source: PubMed Central journal article supplement (PMC4028366)
Supplement: NIHMS545812-supplement-401_2013_1218_MOESM3_ESM.pdf [file NIHMS545812-supplement-401_2013_1218_MOESM3_ESM.pdf]

**Manuscript Title:** Comparative Multidimensional Molecular Analyses of Pediatric Diffuse Intrinsic Pontine Glioma Reveals Distinct Molecular Subtypes

**Journal:** Acta Neuropathologica

**Authors:** Amanda M. Saratsis, Madhuri Kambhampati, Kendall Snyder, Sridevi Yadavilli , Joe Devaney,

Brennan Harmon, Jordan Hall, Eric H. Raabe, Ping An, Melanie Weingart, Brian Rood, Suresh Magge, Roger J. Packer, Javad Nazarian

**Corresponding Author:**

Javad Nazarian, Children’s National Medical Center, Center for Genetic Medicine

111 Michigan Ave., NW, Washington DC, 20010

Phone: 202-476-6022 Fax: 202-476-6014

Email: JNazarian@CNMC.org

| Protein ID | FC<br>104T/104N | FC<br>105T/105N | FC<br>106T/106N | FC<br>111T/111N | FC<br>112T/112N | FC<br>121T/121N | FC<br>347T/347N | FC<br>353T/353N | FC<br>563T/563N | FC<br>537T/537N |
|------------|-----------------|-----------------|-----------------|-----------------|-----------------|-----------------|-----------------|-----------------|-----------------|-----------------|
| A0AVT1     | -2              | ABSENT          | ABSENT          | T ONLY          | T ONLY          | ABSENT          | ABSENT          | 2               | T ONLY          | N ONLY          |
| A0MZ66     | ABSENT          | ABSENT          | ABSENT          | N ONLY          | N ONLY          | N ONLY          | ABSENT          | -6              | N ONLY          | 2               |
| A4D1E9     | ABSENT          |
| A5A3E0     | -1.2            | 2.28571429      | -1.16           | 1.80645161      | 1.65            | 1.12820513      | 1.24137931      | 1.9047619       | -1.4491525      | -2.2333333      |
| A5YM72     | ABSENT          | ABSENT          | ABSENT          | N ONLY          | N ONLY          | ABSENT          | T ONLY          | N ONLY          | ABSENT          | 1               |
| A6NCN2     | ABSENT          | ABSENT          | N ONLY          | T ONLY          | ABSENT          | ABSENT          | ABSENT          | ABSENT          | N ONLY          | ABSENT          |
| A6NEO2     | N Only          | ABSENT          |
| A6NEC2     | -1.75           | -1.5            | 1.33            | 1.25            | 1.5             | 1.2             | 2.66666667      | 2.25            | -1.5            | -2              |
| A6NHL2     | -9              | -1.1428571      | -2.00           | -1.5            | -1.3333333      | -11             | 1.85714286      | -2.6            | -2.4130435      | -1.8636364      |
| A6NL28     | N Only          | -2              | ABSENT          | T ONLY          | 1               | 1               | 2               | ABSENT          | -1.5            | 1.33333333      |
| A6NMY6     | 1.54545455      | -15             | T ONLY          | 4.66666667      | T ONLY          | 11              | 17              | 3               | 6.88888889      | 4.33333333      |
| A8MVX0     | ABSENT          |
| A8MWD9     | 5               | ABSENT          | ABSENT          | T ONLY          | ABSENT          | ABSENT          | ABSENT          | ABSENT          | ABSENT          | ABSENT          |
| B2RPK0     | 2               | 3               | 1.00            | 6               | 1               | 2               | T ONLY          | 2               | T ONLY          | N ONLY          |
| O00139     | -2              | -3              | -2.00           | N ONLY          | ABSENT          | ABSENT          | 2               | N ONLY          | N ONLY          | N ONLY          |
| O00142     | ABSENT          | ABSENT          | ABSENT          | N ONLY          | ABSENT          | ABSENT          | N ONLY          | ABSENT          | ABSENT          | ABSENT          |
| O00148     | 1.5             | T ONLY          | ABSENT          | T ONLY          | T ONLY          | T ONLY          | N ONLY          | T ONLY          | N ONLY          | ABSENT          |
| O00151     | ABSENT          | ABSENT          | ABSENT          | T ONLY          | T ONLY          | ABSENT          | ABSENT          | T ONLY          | ABSENT          | ABSENT          |
| O00154     | N Only          | N ONLY          | N ONLY          | N ONLY          | -2.5            | N ONLY          | 5               | -7              | N ONLY          | -7              |
| O00159     | ABSENT          |
| O00161     | T ONLY          | ABSENT          |
| O00203     | N Only          | ABSENT          | ABSENT          | T ONLY          | ABSENT          | ABSENT          | ABSENT          | ABSENT          | ABSENT          | ABSENT          |
| O00217     | ABSENT          | N ONLY          | ABSENT          | N ONLY          | N ONLY          | ABSENT          | ABSENT          | ABSENT          | N ONLY          | N ONLY          |
| O00231     | 4               | 4               | ABSENT          | 5               | 2               | -1.5            | -2              | 1               | N ONLY          | ABSENT          |
| O00232     | ABSENT          | T ONLY          | ABSENT          | T ONLY          | ABSENT          | T ONLY          | ABSENT          | N ONLY          | ABSENT          | ABSENT          |
| O00233     | 3               | 1               | T ONLY          | N ONLY          | ABSENT          | ABSENT          | 3               | 1               | T ONLY          | 2               |
| O00244     | ABSENT          |
| O00264     | 1               | N ONLY          | ABSENT          | 1               | T ONLY          | 1               | N ONLY          | T ONLY          | N ONLY          | N ONLY          |
| O00291     | N Only          | T ONLY          | ABSENT          | 2               | ABSENT          | ABSENT          | ABSENT          | N ONLY          | ABSENT          | N ONLY          |
| O00299     | 2               | -3              | T ONLY          | T ONLY          | T ONLY          | ABSENT          | T ONLY          | T ONLY          | ABSENT          | T ONLY          |
| O00303     | ABSENT          | T ONLY          | ABSENT          | T ONLY          | ABSENT          | ABSENT          | ABSENT          | ABSENT          | ABSENT          | ABSENT          |
| O00330     | ABSENT          | T ONLY          | ABSENT          | N ONLY          | ABSENT          | ABSENT          | ABSENT          | ABSENT          | N ONLY          | N ONLY          |
| O00339     | N Only          | ABSENT          | ABSENT          | ABSENT          | ABSENT          | T ONLY          | ABSENT          | T ONLY          | ABSENT          | ABSENT          |
| O00408     | ABSENT          | ABSENT          | ABSENT          | ABSENT          | ABSENT          | N ONLY          | N ONLY          | ABSENT          | N ONLY          | N ONLY          |
| O00410     | N Only          | 2               | 1.00            | T ONLY          | -2              | 2               | T ONLY          | 2.5             | 2.66666667      | 2               |
| O00425     | ABSENT          | T ONLY          | ABSENT          |
| O00429     | N Only          | -4              | -7.00           | 1               | N ONLY          | N ONLY          | N ONLY          | ABSENT          | N ONLY          | N ONLY          |
| O00445     | N Only          | N ONLY          | N ONLY          | N ONLY          | ABSENT          | N ONLY          | N ONLY          | ABSENT          | N ONLY          | N ONLY          |
| O00468     | T ONLY          | ABSENT          | ABSENT          | ABSENT          | T ONLY          | ABSENT          | ABSENT          | T ONLY          | T ONLY          | ABSENT          |
| O00471     | ABSENT          | ABSENT          | N ONLY          | ABSENT          |
| O00483     | N Only          | -7              | N ONLY          | -4              | 1               | -5              | -3              | 3               | -3              | -4.5            |
| O00499     | ABSENT          | ABSENT          | N ONLY          | -18             | N ONLY          |
| O00533     | N Only          | -3              | N ONLY          | -1.3333333      | N ONLY          | N ONLY          | 3               | 1               | -1.5            | -4.5            |
| O00534     | ABSENT          | T ONLY          | ABSENT          | ABSENT          |
| O00567     | ABSENT          | ABSENT          | ABSENT          | T ONLY          | ABSENT          | ABSENT          | ABSENT          | T ONLY          | ABSENT          | ABSENT          |
| O00571     | 3.5             | 6               | T ONLY          | T ONLY          | T ONLY          | 3               | 12              | 7               | T ONLY          | N ONLY          |
| O00625     | ABSENT          |
| O00764     | -4              | -1.5            | 2.00            | N ONLY          | 1               | -1.6666667      | 1               | 5               | -2              | -3.5            |

| Protein ID | FC<br>104T/104N | FC<br>105T/105N | FC<br>106T/106N | FC<br>111T/111N | FC<br>112T/112N | FC<br>121T/121N | FC<br>347T/347N | FC<br>353T/353N | FC<br>563T/563N | FC<br>537T/537N |
|------------|-----------------|-----------------|-----------------|-----------------|-----------------|-----------------|-----------------|-----------------|-----------------|-----------------|
| O14495     | N Only          | N ONLY          | N ONLY          | ABSENT          | ABSENT          | ABSENT          | ABSENT          | T ONLY          | -1.5            | ABSENT          |
| O14531     | ABSENT          | 1.75            | 1.00            | -2              | 1               | N ONLY          | 1               | -4.5            | -12             | -2.5            |
| O14558     | -4              | 1               | T ONLY          | T ONLY          | T ONLY          | ABSENT          | T ONLY          | T ONLY          | T ONLY          | T ONLY          |
| O14561     | N Only          | ABSENT          | N ONLY          | T ONLY          | ABSENT          | ABSENT          | N ONLY          | T ONLY          | -2.5            | N ONLY          |
| O14562     | ABSENT          |
| O14576     | N Only          | T ONLY          | N ONLY          | N ONLY          | N ONLY          |
| O14578     | ABSENT          | ABSENT          | ABSENT          | ABSENT          | ABSENT          | N ONLY          | ABSENT          | T ONLY          | ABSENT          | N ONLY          |
| O14594     | 1.7             | T ONLY          | N ONLY          | 7               | ABSENT          | 2.16666667      | 1               | 5               | -2.25           | -1.5            |
| O14617     | ABSENT          | N ONLY          | ABSENT          | T ONLY          | ABSENT          | N ONLY          | ABSENT          | ABSENT          | N ONLY          | N ONLY          |
| O14735     | ABSENT          | ABSENT          | ABSENT          | ABSENT          | ABSENT          | N ONLY          | ABSENT          | 1               | N ONLY          | ABSENT          |
| O14737     | -1.25           | N ONLY          | N ONLY          | 8               | 4               | 1               | 2               | T ONLY          | N ONLY          | N ONLY          |
| O14744     | N Only          | T ONLY          | ABSENT          | T ONLY          | N ONLY          | ABSENT          | T ONLY          | N ONLY          | 1.33333333      | ABSENT          |
| O14745     | T ONLY          | 1.33333333      | T ONLY          | ABSENT          | N ONLY          | 1               | 1               | -2              | N ONLY          | ABSENT          |
| O14773     | 1               | N ONLY          | N ONLY          | 1               | 1               | 1               | N ONLY          | 1               | -6              | N ONLY          |
| O14775     | ABSENT          | ABSENT          | N ONLY          | ABSENT          | ABSENT          | N ONLY          | N ONLY          | ABSENT          | N ONLY          | N ONLY          |
| O14776     | T ONLY          | T ONLY          | T ONLY          | 3               | ABSENT          | N ONLY          | ABSENT          | T ONLY          | T ONLY          | N ONLY          |
| O14787     | T ONLY          | T ONLY          | ABSENT          | 3               | T ONLY          | T ONLY          | 1               | T ONLY          | ABSENT          | ABSENT          |
| O14807     | ABSENT          | N ONLY          | N ONLY          |
| O14818     | 1               | -2              | 1.00            | T ONLY          | T ONLY          | 1               | 2               | T ONLY          | -1.5            | -1.5            |
| O14910     | ABSENT          | N ONLY          | 2.00            | N ONLY          | ABSENT          | N ONLY          | N ONLY          | T ONLY          | N ONLY          | N ONLY          |
| O14936     | N Only          | 2               | T ONLY          | T ONLY          | ABSENT          | N ONLY          | T ONLY          | T ONLY          | T ONLY          | N ONLY          |
| O14949     | ABSENT          | ABSENT          | ABSENT          | ABSENT          | ABSENT          | 1               | ABSENT          | ABSENT          | ABSENT          | N ONLY          |
| O14950     | 1.85714286      | N ONLY          | -1.40           | 2.6             | 8               | 1               | -3              | 6               | -4.5            | -3.5            |
| O14974     | ABSENT          | T ONLY          | ABSENT          | N ONLY          |
| O14979     | 1.5             | T ONLY          | ABSENT          | T ONLY          | T ONLY          | ABSENT          | T ONLY          | T ONLY          | ABSENT          | 2               |
| O14980     | -1.5            | N ONLY          | 1.00            | T ONLY          | N ONLY          | 3               | 1.66666667      | 4               | T ONLY          | T ONLY          |
| O14983     | N Only          | T ONLY          | N ONLY          | ABSENT          | ABSENT          | -3              | N ONLY          | T ONLY          | N ONLY          | -3              |
| O14994     | ABSENT          | ABSENT          | N ONLY          | ABSENT          | ABSENT          | N ONLY          | ABSENT          | ABSENT          | ABSENT          | N ONLY          |
| O15020     | -4              | -4              | -2.00           | -2.25           | -2              | N ONLY          | 1.25            | -3              | -7.5            | -3.8333333      |
| O15031     | ABSENT          | T ONLY          | T ONLY          | T ONLY          | ABSENT          | ABSENT          | ABSENT          | T ONLY          | ABSENT          | ABSENT          |
| O15042     | ABSENT          | ABSENT          | ABSENT          | T ONLY          | ABSENT          | ABSENT          | ABSENT          | ABSENT          | ABSENT          | ABSENT          |
| O15061     | ABSENT          | ABSENT          | T ONLY          | T ONLY          | ABSENT          | T ONLY          | ABSENT          | T ONLY          | ABSENT          | ABSENT          |
| O15067     | T ONLY          | T ONLY          | 1.00            | ABSENT          | T ONLY          | N ONLY          | T ONLY          | T ONLY          | ABSENT          | N ONLY          |
| O15075     | 1.4             | -2.25           | -3.67           | 1               | 1               | -1.375          | -7              | 5               | -3.375          | N ONLY          |
| O15083     | ABSENT          | ABSENT          | N ONLY          | N ONLY          | ABSENT          | N ONLY          | N ONLY          | T ONLY          | -6              | N ONLY          |
| O15144     | 1.5             | -1.1428571      | 1.29            | 2.25            | 1.14285714      | -1.4            | -3.5            | 1.6             | -2.4            | 1.27272727      |
| O15145     | -4              | ABSENT          | -3.00           | 1.5             | 1               | 2               | 1               | 1               | -3              | N ONLY          |
| O15173     | 2               | ABSENT          | ABSENT          | 1               | ABSENT          | ABSENT          | ABSENT          | ABSENT          | N ONLY          | N ONLY          |
| O15212     | T ONLY          | ABSENT          | N ONLY          | ABSENT          | N ONLY          | ABSENT          | T ONLY          | ABSENT          | ABSENT          | N ONLY          |
| O15230     | ABSENT          | ABSENT          | ABSENT          | T ONLY          | T ONLY          | ABSENT          | T ONLY          | ABSENT          | T ONLY          | ABSENT          |
| O15294     | ABSENT          | ABSENT          | T ONLY          | ABSENT          | ABSENT          | N ONLY          | T ONLY          | ABSENT          | ABSENT          | N ONLY          |
| O15347     | N Only          | T ONLY          | ABSENT          | T ONLY          | T ONLY          | T ONLY          | ABSENT          | T ONLY          | ABSENT          | ABSENT          |
| O15355     | T ONLY          | ABSENT          | ABSENT          | T ONLY          | ABSENT          | T ONLY          | ABSENT          | ABSENT          | ABSENT          | ABSENT          |
| O15357     | ABSENT          |
| O15394     | -4              | N ONLY          | -10.00          | -3              | N ONLY          | -5.5            | -2              | -1.33333333     | -7.125          | N ONLY          |
| O15498     | N Only          | T ONLY          | ABSENT          | T ONLY          | 1               | T ONLY          | ABSENT          | ABSENT          | 1               | N ONLY          |
| O15511     | 1               | -2              | -2.00           | 5               | 2               | -2              | T ONLY          | 1.5             | 1.33333333      | 1               |
| O15523     | 5               | T ONLY          | T ONLY          | T ONLY          | T ONLY          | 2               | T ONLY          | 5               | T ONLY          | N ONLY          |
| O15540     | -5              | N ONLY          | -2.00           | T ONLY          | T ONLY          | 1               | 2               | 6               | 2               | 1               |
| O43143     | -3              | 1               | ABSENT          | T ONLY          | ABSENT          | ABSENT          | T ONLY          | T ONLY          | T ONLY          | ABSENT          |
| O43157     | T ONLY          | ABSENT          | ABSENT          | ABSENT          | ABSENT          | ABSENT          | N ONLY          | T ONLY          | ABSENT          | ABSENT          |
| O43169     | T ONLY          | N ONLY          | N ONLY          | ABSENT          | ABSENT          | ABSENT          | ABSENT          | ABSENT          | N ONLY          | -1.25           |
| O43175     | -1.0666667      | 2.9             | 5.00            | -1.0909091      | -2.75           | 4.2             | 1.71428571      | 1.35714286      | 1.95238095      | 1.05882353      |
| O43236     | ABSENT          | N ONLY          | ABSENT          | N ONLY          |
| O43237     | -3              | -3              | T ONLY          | N ONLY          | 1               | ABSENT          | N ONLY          | -4              | N ONLY          | ABSENT          |
| O43242     | N Only          | T ONLY          | T ONLY          | T ONLY          | ABSENT          | N ONLY          | 1               | ABSENT          | 1.33333333      | 1               |
| O43272     | ABSENT          | T ONLY          | ABSENT          |
| O43290     | ABSENT          |
| O43301     | -6              | -26             | -3.91           | -10             | -2.7272727      | N ONLY          | 1.52380952      | N ONLY          | N ONLY          | -7.33333333     |
| O43324     | -2              | ABSENT          | ABSENT          | ABSENT          | ABSENT          | ABSENT          | ABSENT          | T ONLY          | ABSENT          | ABSENT          |
| O43390     | -1.33333333     | 6               | N ONLY          | 11              | 2               | T ONLY          | 2.5             | T ONLY          | N ONLY          | N ONLY          |
| O43396     | 1               | 2               | ABSENT          | 3               | -2              | -2              | 3               | 4               | 1.33333333      | N ONLY          |

| Protein ID | FC 104T/104N | FC 105T/105N | FC 106T/106N | FC 111T/111N | FC 112T/112N | FC 121T/121N | FC 347T/347N | FC 353T/353N | FC 563T/563N | FC 537T/537N |
|------------|--------------|--------------|--------------|--------------|--------------|--------------|--------------|--------------|--------------|--------------|
| O43399     | 2            | 1            | N ONLY       | 4            | T ONLY       | 2            | 4            | 2            | N ONLY       | N ONLY       |
| O43402     | ABSENT       | ABSENT       | ABSENT       | T ONLY       | ABSENT       | ABSENT       | ABSENT       | ABSENT       | ABSENT       | ABSENT       |
| O43424     | ABSENT       |
| O43426     | N Only       | ABSENT       | N ONLY       | N ONLY       | ABSENT       | N ONLY       | -9           | N ONLY       | N ONLY       | N ONLY       |
| O43447     | -2           | ABSENT       | ABSENT       | 1            | N ONLY       | 1            | N ONLY       | ABSENT       | ABSENT       | N ONLY       |
| O43464     | ABSENT       | T ONLY       | N ONLY       | ABSENT       | ABSENT       | T ONLY       | ABSENT       | ABSENT       | N ONLY       | ABSENT       |
| O43488     | -2           | -4.5         | T ONLY       | 1            | -3           | 3.5          | 1.5          | 1.6          | 1            | 1.33333333   |
| O43491     | 4            | 3            | T ONLY       | 2            | -3           | T ONLY       | T ONLY       | 1            | T ONLY       | N ONLY       |
| O43592     | N Only       | T ONLY       | ABSENT       | T ONLY       | ABSENT       | T ONLY       | T ONLY       | T ONLY       | T ONLY       | 2            |
| O43602     | ABSENT       | ABSENT       | ABSENT       | T ONLY       | ABSENT       | T ONLY       | ABSENT       | ABSENT       | T ONLY       | ABSENT       |
| O43615     | T ONLY       | T ONLY       | ABSENT       | T ONLY       | ABSENT       | ABSENT       | ABSENT       | ABSENT       | ABSENT       | ABSENT       |
| O43617     | T ONLY       | ABSENT       | N ONLY       | T ONLY       | ABSENT       | ABSENT       | ABSENT       | ABSENT       | T ONLY       | ABSENT       |
| O43665     | T ONLY       | T ONLY       | ABSENT       | ABSENT       | ABSENT       | N ONLY       | ABSENT       | ABSENT       | ABSENT       | ABSENT       |
| O43676     | 1            | ABSENT       | N ONLY       | T ONLY       | ABSENT       | -2           | T ONLY       | T ONLY       | N ONLY       | N ONLY       |
| O43678     | N Only       | ABSENT       | N ONLY       | -1.5         | T ONLY       | N ONLY       | N ONLY       | T ONLY       | N ONLY       | 1.5          |
| O43681     | ABSENT       | T ONLY       | N ONLY       | 3            | T ONLY       | T ONLY       | T ONLY       | 1            | N ONLY       | N ONLY       |
| O43684     | ABSENT       | ABSENT       | ABSENT       | T ONLY       | ABSENT       | T ONLY       | ABSENT       | T ONLY       | ABSENT       | ABSENT       |
| O43707     | 1.5          | -4           | -2.63        | -1.047619    | 2.66666667   | -1.25        | -1.1875      | 1.125        | -1.4444444   | -3.4         |
| O43747     | ABSENT       | ABSENT       | N ONLY       | ABSENT       | ABSENT       | ABSENT       | T ONLY       | ABSENT       | N ONLY       | N ONLY       |
| O43759     | N Only       | -18          | ABSENT       | N ONLY       | N ONLY       |
| O43760     | 1            | ABSENT       | ABSENT       | 1            | N ONLY       | ABSENT       | ABSENT       | N ONLY       | ABSENT       | 2            |
| O43761     | N Only       | N ONLY       | N ONLY       | N ONLY       | ABSENT       | N ONLY       | N ONLY       | ABSENT       | N ONLY       | N ONLY       |
| O43765     | -2           | 1            | ABSENT       | T ONLY       | ABSENT       | 3            | T ONLY       | T ONLY       | -9           | N ONLY       |
| O43768     | -4           | -2           | -3.00        | T ONLY       | T ONLY       | -3           | N ONLY       | 1.5          | N ONLY       | -1.25        |
| O43776     | 1            | 3            | 1.00         | 3            | ABSENT       | 1            | 3            | ABSENT       | -1.5         | 1            |
| O43809     | T ONLY       | ABSENT       | ABSENT       | T ONLY       | ABSENT       | ABSENT       | ABSENT       | T ONLY       | N ONLY       | ABSENT       |
| O43813     | N Only       | -4           | -2.00        | -3           | -8           | -1.5         | -2.5         | -5           | -1.5         | N ONLY       |
| O43837     | N Only       | N ONLY       | N ONLY       | -3           | N ONLY       | N ONLY       | -3           | 1            | N ONLY       | -2.5         |
| O43852     | ABSENT       | ABSENT       | ABSENT       | T ONLY       | ABSENT       | ABSENT       | ABSENT       | ABSENT       | ABSENT       | ABSENT       |
| O43865     | -2           | -2.25        | -2.00        | ABSENT       | N ONLY       | N ONLY       | ABSENT       | ABSENT       | -4.5         | -2.5         |
| O43920     | N Only       | ABSENT       | N ONLY       | N ONLY       | ABSENT       | N ONLY       | ABSENT       | T ONLY       | N ONLY       | N ONLY       |
| O60216     | ABSENT       |
| O60220     | 1            | T ONLY       | T ONLY       | ABSENT       | ABSENT       | N ONLY       | ABSENT       | ABSENT       | ABSENT       | N ONLY       |
| O60256     | T ONLY       | 1            | T ONLY       | ABSENT       | ABSENT       | T ONLY       | ABSENT       | ABSENT       | N ONLY       | N ONLY       |
| O60264     | ABSENT       | 1            | ABSENT       | T ONLY       | ABSENT       | ABSENT       | ABSENT       | ABSENT       | ABSENT       | ABSENT       |
| O60271     | ABSENT       | ABSENT       | N ONLY       | ABSENT       | ABSENT       | ABSENT       | ABSENT       | N ONLY       | ABSENT       | ABSENT       |
| O60282     | -2.5         | -3           | -2.00        | -2           | -1.3333333   | -3           | 1.66666667   | -2.6666667   | -1.5         | -3.25        |
| O60313     | N Only       | -2.5         | N ONLY       | N ONLY       | T ONLY       | N ONLY       | 2            | 2.5          | -21          | -5           |
| O60341     | ABSENT       |
| O60437     | ABSENT       |
| O60493     | -1.5         | N ONLY       | 1.00         | 4            | ABSENT       | 2            | N ONLY       | T ONLY       | 1.33333333   | N ONLY       |
| O60506     | 1.5          | 10           | ABSENT       | T ONLY       | 1            | T ONLY       | T ONLY       | T ONLY       | N ONLY       | ABSENT       |
| O60524     | ABSENT       | N ONLY       |
| O60568     | ABSENT       | T ONLY       | ABSENT       | T ONLY       | ABSENT       | ABSENT       | ABSENT       | T ONLY       | ABSENT       | ABSENT       |
| O60641     | -4           | N ONLY       | N ONLY       | N ONLY       | -3           | N ONLY       | -4.8571429   | N ONLY       | N ONLY       | N ONLY       |
| O60664     | T ONLY       | T ONLY       | ABSENT       | ABSENT       | 1            | T ONLY       | T ONLY       | -2.5         | ABSENT       | -3           |
| O60701     | T ONLY       | T ONLY       | ABSENT       | T ONLY       | ABSENT       | T ONLY       | T ONLY       | T ONLY       | T ONLY       | ABSENT       |
| O60716     | ABSENT       |
| O60749     | ABSENT       | T ONLY       | 1.00         | -2           | ABSENT       | 1            | T ONLY       | -3           | N ONLY       | N ONLY       |
| O60762     | T ONLY       | T ONLY       | ABSENT       | ABSENT       | T ONLY       | ABSENT       | ABSENT       | ABSENT       | N ONLY       | ABSENT       |
| O60763     | 1            | 2            | 2.00         | T ONLY       | T ONLY       | 1            | T ONLY       | T ONLY       | -2.25        | 1.6          |
| O60784     | ABSENT       | ABSENT       | T ONLY       | ABSENT       | ABSENT       | ABSENT       | ABSENT       | 1            | ABSENT       | T ONLY       |
| O60812     | 2.3          | 3            | -1.50        | 10           | -1.6666667   | 1.6          | 3            | 1.5          | -3           | -1.5         |
| O60825     | N Only       | ABSENT       | ABSENT       | T ONLY       | ABSENT       | T ONLY       | ABSENT       | N ONLY       | T ONLY       | ABSENT       |
| O60832     | ABSENT       | T ONLY       | ABSENT       |
| O60861     | ABSENT       | ABSENT       | ABSENT       | ABSENT       | ABSENT       | N ONLY       | ABSENT       | ABSENT       | ABSENT       | ABSENT       |
| O60925     | 1            | ABSENT       | -2.00        | ABSENT       | N ONLY       | -3           | ABSENT       | 1            | -2.25        | N ONLY       |
| O75044     | ABSENT       | ABSENT       | ABSENT       | ABSENT       | ABSENT       | ABSENT       | T ONLY       | ABSENT       | ABSENT       | ABSENT       |
| O75051     | ABSENT       | ABSENT       | N ONLY       | ABSENT       | ABSENT       | N ONLY       | N ONLY       | ABSENT       | N ONLY       | ABSENT       |
| O75061     | ABSENT       | N ONLY       | N ONLY       | N ONLY       | ABSENT       | ABSENT       | T ONLY       | N ONLY       | N ONLY       | N ONLY       |
| O75083     | N Only       | 1            | T ONLY       | T ONLY       | ABSENT       | 3            | T ONLY       | 3            | -1.5         | 2            |
| O75116     | ABSENT       | ABSENT       | ABSENT       | ABSENT       | ABSENT       | 1            | ABSENT       | T ONLY       | ABSENT       | N ONLY       |

| Protein ID | FC 104T/104N | FC 105T/105N | FC 106T/106N | FC 111T/111N | FC 112T/112N | FC 121T/121N | FC 347T/347N | FC 353T/353N | FC 563T/563N | FC 537T/537N |
|------------|--------------|--------------|--------------|--------------|--------------|--------------|--------------|--------------|--------------|--------------|
| O75122     | ABSENT       | ABSENT       | ABSENT       | ABSENT       | N ONLY       | ABSENT       | T ONLY       | N ONLY       | N ONLY       | N ONLY       |
| O75131     | -1.5         | 1.16666667   | -2.00        | 3.5          | 2            | -2           | 2            | 1.33333333   | -1.5         | 8            |
| O75145     | ABSENT       | ABSENT       | ABSENT       | ABSENT       | ABSENT       | N ONLY       | ABSENT       | ABSENT       | N ONLY       | N ONLY       |
| O75146     | N Only       | N ONLY       | ABSENT       | T ONLY       | ABSENT       | ABSENT       | T ONLY       | T ONLY       | T ONLY       | ABSENT       |
| O75190     | ABSENT       | T ONLY       | N ONLY       | N ONLY       | T ONLY       | N ONLY       | N ONLY       | ABSENT       | N ONLY       | N ONLY       |
| O75223     | -4           | N ONLY       | -1.67        | 2.33333333   | 2            | -1.33333333  | 1            | 2            | -3           | 1            |
| O75251     | 1            | N ONLY       | N ONLY       | -2           | ABSENT       | -4.33333333  | -3           | T ONLY       | -4           | -6.5         |
| O75306     | 1            | 1            | N ONLY       | 1.33333333   | ABSENT       | N ONLY       | -1.33333333  | T ONLY       | N ONLY       | N ONLY       |
| O75323     | N Only       | 2.5          | N ONLY       | 2            | 2            | -2           | 2            | 2            | N ONLY       | 4            |
| O75334     | ABSENT       | N ONLY       |
| O75340     | 2            | N ONLY       | N ONLY       | 2            | ABSENT       | N ONLY       | N ONLY       | ABSENT       | N ONLY       | N ONLY       |
| O75347     | 2            | -2.5         | 2.00         | 2            | 4            | -1.25        | 1            | 1.33333333   | -1.5         | 1            |
| O75348     | N Only       | N ONLY       | N ONLY       | T ONLY       | T ONLY       | -2           | N ONLY       | ABSENT       | N ONLY       | N ONLY       |
| O75363     | N Only       | N ONLY       | ABSENT       | N ONLY       | -9           | ABSENT       | ABSENT       | -8           | ABSENT       | -1.5         |
| O75366     | ABSENT       | N ONLY       | ABSENT       |
| O75367     | 1            | T ONLY       | ABSENT       | N ONLY       | T ONLY       | T ONLY       | ABSENT       | T ONLY       | ABSENT       | T ONLY       |
| O75368     | -1.4         | -1.16666667  | 6.00         | 1.2          | 4.5          | 1.83333333   | 2            | 3            | T ONLY       | -1.5         |
| O75369     | T ONLY       | -3           | T ONLY       | N ONLY       |
| O75382     | ABSENT       | ABSENT       | N ONLY       | ABSENT       | N ONLY       | N ONLY       | ABSENT       | N ONLY       | ABSENT       | N ONLY       |
| O75390     | ABSENT       | -2.5         | N ONLY       | 2            | T ONLY       | N ONLY       | 1.33333333   | T ONLY       | N ONLY       | N ONLY       |
| O75396     | 1.25         | 3.5          | 3.00         | 1            | 3            | 1.33333333   | -2           | 1            | 1            | -1.75        |
| O75400     | ABSENT       | ABSENT       | ABSENT       | T ONLY       | ABSENT       | ABSENT       | ABSENT       | ABSENT       | ABSENT       | ABSENT       |
| O75431     | N Only       | 1            | N ONLY       | ABSENT       | ABSENT       | -3           | 1            | ABSENT       | N ONLY       | 2            |
| O75436     | ABSENT       | N ONLY       | T ONLY       | ABSENT       | N ONLY       | -2           | ABSENT       | N ONLY       | -7.5         | ABSENT       |
| O75439     | ABSENT       |
| O75475     | ABSENT       | T ONLY       | N ONLY       | ABSENT       |
| O75477     | 1            | 5            | ABSENT       | 1.33333333   | ABSENT       | T ONLY       | T ONLY       | 5            | T ONLY       | ABSENT       |
| O75489     | -1.5         | -1.5         | -4.00        | -2           | 3            | -10          | -1.33333333  | 1.5          | -9.75        | N ONLY       |
| O75508     | N Only       | ABSENT       | ABSENT       | -3           | 4            | N ONLY       | T ONLY       | N ONLY       | 2.66666667   | N ONLY       |
| O75521     | ABSENT       | -2           | ABSENT       | ABSENT       | ABSENT       | N ONLY       | ABSENT       | T ONLY       | ABSENT       | ABSENT       |
| O75525     | ABSENT       | ABSENT       | ABSENT       | T ONLY       | ABSENT       | ABSENT       | ABSENT       | ABSENT       | ABSENT       | ABSENT       |
| O75526     | T ONLY       | T ONLY       | ABSENT       | T ONLY       | N ONLY       | T ONLY       | ABSENT       | ABSENT       | N ONLY       | T ONLY       |
| O75533     | T ONLY       | ABSENT       | ABSENT       | T ONLY       | T ONLY       | T ONLY       | ABSENT       | T ONLY       | T ONLY       | ABSENT       |
| O75534     | ABSENT       | N ONLY       | ABSENT       | T ONLY       | ABSENT       | ABSENT       | T ONLY       | 1            | N ONLY       | ABSENT       |
| O75608     | N Only       | T ONLY       | ABSENT       | T ONLY       | T ONLY       | -2           | T ONLY       | T ONLY       | N ONLY       | ABSENT       |
| O75643     | T ONLY       | T ONLY       | ABSENT       | T ONLY       | ABSENT       | ABSENT       | T ONLY       | T ONLY       | T ONLY       | T ONLY       |
| O75746     | N Only       | -1.5         | N ONLY       | N ONLY       | N ONLY       | N ONLY       | 1.125        | N ONLY       | N ONLY       | -3.83333333  |
| O75781     | N Only       | ABSENT       | 1.00         | ABSENT       | ABSENT       | N ONLY       | ABSENT       | ABSENT       | -9           | N ONLY       |
| O75822     | 1            | T ONLY       | ABSENT       | N ONLY       | N ONLY       | N ONLY       | T ONLY       | 1            | T ONLY       | ABSENT       |
| O75832     | -2           | -2           | ABSENT       | T ONLY       | N ONLY       | ABSENT       | T ONLY       | 1            | T ONLY       | 2            |
| O75874     | 1            | 6            | N ONLY       | 8            | T ONLY       | 4            | 3            | 8            | -2.5         | 1            |
| O75891     | 2            | -2.33333333  | 2.75         | T ONLY       | 1            | 4            | 4.75         | T ONLY       | 1.2          | -1.66666667  |
| O75914     | T ONLY       | T ONLY       | N ONLY       | T ONLY       | ABSENT       | N ONLY       |
| O75915     | 1            | N ONLY       | N ONLY       | 4            | T ONLY       | ABSENT       | T ONLY       | ABSENT       | -4.5         | ABSENT       |
| O75935     | -2           | N ONLY       | -2.00        | -2           | 2            | -2           | 1            | N ONLY       | -2.5         | -1.5         |
| O75936     | T ONLY       | N ONLY       | ABSENT       | ABSENT       | ABSENT       | T ONLY       | ABSENT       | T ONLY       | T ONLY       | ABSENT       |
| O75937     | ABSENT       | T ONLY       | ABSENT       | T ONLY       | ABSENT       | ABSENT       | ABSENT       | T ONLY       | ABSENT       | ABSENT       |
| O75947     | -3           | -1.33333333  | -2.00        | 1            | 2.33333333   | -6           | -1.75        | 1.33333333   | -3           | -1.25        |
| O75955     | T ONLY       | -2           | N ONLY       | 1            | ABSENT       | -2.25        | -5           | -2           | -30          | -4.5         |
| O75964     | -2.5         | -2           | -14.00       | 2            | T ONLY       | N ONLY       | -3           | 1            | -4.8         | -4           |
| O76013     | N Only       | N ONLY       | -9.00        | -9           | N ONLY       | ABSENT       | N ONLY       | ABSENT       | -6           | T ONLY       |
| O76038     | ABSENT       |
| O76041     | ABSENT       | T ONLY       | T ONLY       | ABSENT       | ABSENT       | T ONLY       | N ONLY       | ABSENT       | ABSENT       | ABSENT       |
| O76054     | ABSENT       | T ONLY       | ABSENT       |
| O76070     | -2.375       | N ONLY       | -2.00        | -4           | 1            | -4           | 2            | N ONLY       | -7.5         | -2.83333333  |
| O76074     | ABSENT       |
| O76094     | ABSENT       |
| O94760     | -1.8181818   | -2           | 2.50         | -2.66666667  | -4.25        | 1            | -1.3846154   | 1.81818182   | -1.05555556  | -3           |
| O94811     | N Only       |
| O94819     | ABSENT       | 1.33333333   | 1.38         | N ONLY       | N ONLY       | N ONLY       | -2           | -2           | -2.25        | -6.5         |
| O94826     | N Only       | -4           | N ONLY       | T ONLY       | N ONLY       | N ONLY       | 2            | N ONLY       | N ONLY       | N ONLY       |
| O94832     | N Only       | N ONLY       | ABSENT       | N ONLY       | N ONLY       | ABSENT       | T ONLY       | N ONLY       | ABSENT       | N ONLY       |

| Protein ID | FC<br>104T/104N | FC<br>105T/105N | FC<br>106T/106N | FC<br>111T/111N | FC<br>112T/112N | FC<br>121T/121N | FC<br>347T/347N | FC<br>353T/353N | FC<br>563T/563N | FC<br>537T/537N |
|------------|-----------------|-----------------|-----------------|-----------------|-----------------|-----------------|-----------------|-----------------|-----------------|-----------------|
| O94856     | -4.6666667      | -6.5            | -3.60           | -27             | -18             | -5.5            | -1.2142857      | N ONLY          | -9.5            | -4.1666667      |
| O94874     | T ONLY          | T ONLY          | ABSENT          | T ONLY          | ABSENT          | T ONLY          | T ONLY          | T ONLY          | ABSENT          | ABSENT          |
| O94903     | N Only          | 1               | T ONLY          | T ONLY          | N ONLY          | T ONLY          | T ONLY          | 1               | N ONLY          | 2               |
| O94905     | 1               | 7               | T ONLY          | 1.66666667      | T ONLY          | T ONLY          | T ONLY          | 8               | T ONLY          | T ONLY          |
| O94906     | ABSENT          | ABSENT          | ABSENT          | T ONLY          | ABSENT          | ABSENT          | ABSENT          | T ONLY          | ABSENT          | ABSENT          |
| O94910     | ABSENT          | N ONLY          |
| O94919     | N Only          | ABSENT          | ABSENT          | N ONLY          | ABSENT          | ABSENT          | ABSENT          | ABSENT          | ABSENT          | N ONLY          |
| O94921     | ABSENT          |
| O94925     | N Only          | ABSENT          | N ONLY          | N ONLY          | ABSENT          | N ONLY          | -2              | ABSENT          | N ONLY          | -2              |
| O94973     | N Only          | -2.6666667      | -4.50           | -2.75           | 1.5             | -9              | 1.09090909      | -1.25           | -8.25           | -10             |
| O94979     | T ONLY          | ABSENT          | ABSENT          | T ONLY          | ABSENT          | ABSENT          | ABSENT          | ABSENT          | ABSENT          | ABSENT          |
| O94985     | ABSENT          | ABSENT          | N ONLY          | ABSENT          | ABSENT          | N ONLY          | ABSENT          | T ONLY          | N ONLY          | ABSENT          |
| O95057     | ABSENT          | ABSENT          | N ONLY          | N ONLY          | ABSENT          | N ONLY          | T ONLY          | ABSENT          | N ONLY          | N ONLY          |
| O95168     | N Only          | 2               | N ONLY          | 1               | T ONLY          | N ONLY          | -2              | 1               | N ONLY          | -2              |
| O95182     | T ONLY          | N ONLY          | N ONLY          | -2              | T ONLY          | -6              | N ONLY          | T ONLY          | N ONLY          | N ONLY          |
| O95197     | 1.25            | -3              | N ONLY          | 1               | -3              | -3              | -2.6666667      | -3              | -4.7142857      | -6.25           |
| O95202     | -5              | 1.5             | -6.00           | 4               | N ONLY          | -5              | 4               | T ONLY          | N ONLY          | -2.5            |
| O95292     | 1.66666667      | -4              | -8.00           | 1.5             | -2              | N ONLY          | 1.25            | T ONLY          | -9              | N ONLY          |
| O95298     | 1               | N ONLY          | N ONLY          | T ONLY          | ABSENT          | 1               | 1               | ABSENT          | N ONLY          | N ONLY          |
| O95299     | T ONLY          | N ONLY          | N ONLY          | N ONLY          | ABSENT          | N ONLY          | 1               | T ONLY          | N ONLY          | N ONLY          |
| O95336     | 1               | 2               | 2.00            | 2.5             | 3               | 5               | 4               | 1.66666667      | 1.5             | 2               |
| O95347     | ABSENT          | T ONLY          | ABSENT          | T ONLY          | ABSENT          | ABSENT          | ABSENT          | ABSENT          | ABSENT          | ABSENT          |
| O95372     | N Only          | ABSENT          | ABSENT          | T ONLY          | ABSENT          | ABSENT          | ABSENT          | ABSENT          | ABSENT          | N ONLY          |
| O95373     | -2              | T ONLY          | 1.00            | 3               | T ONLY          | T ONLY          | 2               | 2               | 1.33333333      | 2               |
| O95460     | ABSENT          |
| O95563     | 1               | N ONLY          | ABSENT          | ABSENT          | ABSENT          | ABSENT          | ABSENT          | ABSENT          | N ONLY          | ABSENT          |
| O95573     | ABSENT          |
| O95613     | -2              | -5              | T ONLY          | -1.5            | N ONLY          | T ONLY          | T ONLY          | N ONLY          | T ONLY          | 2               |
| O95670     | 1               | N ONLY          | N ONLY          | N ONLY          | -2              | N ONLY          |
| O95678     | 1.30909091      | -7.05           | -1.52           | -1.2287582      | 1.44067797      | -3.6428571      | 1.53448276      | 1.44444444      | -1.2            | 1.2             |
| O95721     | ABSENT          | T ONLY          | T ONLY          | ABSENT          | ABSENT          | ABSENT          | ABSENT          | ABSENT          | -4.5            | N ONLY          |
| O95741     | -2              | -1.2            | 1.00            | 4               | 2               | -6              | 2               | -3              | -2.25           | 4               |
| O95747     | T ONLY          | T ONLY          | ABSENT          | ABSENT          | T ONLY          | T ONLY          | T ONLY          | 1               | ABSENT          | N ONLY          |
| O95757     | -3              | -2              | 1.00            | N ONLY          | N ONLY          | 1               | -1.3333333      | T ONLY          | -13.5           | N ONLY          |
| O95782     | N Only          | -4.5            | -5.40           | -2.5            | -2              | -9.5            | -1.2857143      | -1.5            | -11             | -5.1            |
| O95817     | T ONLY          | T ONLY          | ABSENT          | T ONLY          | ABSENT          | ABSENT          | ABSENT          | T ONLY          | T ONLY          | ABSENT          |
| O95831     | ABSENT          | N ONLY          | N ONLY          | T ONLY          | T ONLY          | N ONLY          | N ONLY          | T ONLY          | N ONLY          | N ONLY          |
| O95837     | N Only          | 1               | N ONLY          | 3               | 1               | -3              | T ONLY          | -3              | N ONLY          | -2              |
| O95847     | ABSENT          | N ONLY          | N ONLY          |
| O95861     | -1.5            | -2              | T ONLY          | T ONLY          | 1               | 3               | T ONLY          | 4               | -3              | 2               |
| O95865     | 2               | -1.5            | 4.00            | 2.5             | 4               | T ONLY          | T ONLY          | 2.25            | 2.33333333      | 2               |
| O95970     | ABSENT          | ABSENT          | ABSENT          | ABSENT          | ABSENT          | N ONLY          | ABSENT          | ABSENT          | N ONLY          | N ONLY          |
| O96000     | -5              | N ONLY          | -5.00           | 1.33333333      | 4               | -4              | 1.5             | 1               | -3.75           | -1.75           |
| O96008     | N Only          | ABSENT          | ABSENT          | ABSENT          | ABSENT          | N ONLY          | ABSENT          | T ONLY          | N ONLY          | N ONLY          |
| O96019     | T ONLY          | T ONLY          | ABSENT          | T ONLY          | ABSENT          | T ONLY          | ABSENT          | ABSENT          | ABSENT          | ABSENT          |
| P00325     | ABSENT          |
| P00338     | 1.375           | -1.75           | 1.00            | 1.57142857      | 1.64285714      | -1.625          | 2.88888889      | -2.75           | 1.07407407      | -1.4545455      |
| P00352     | N Only          | N ONLY          | ABSENT          | T ONLY          | N ONLY          | N ONLY          | ABSENT          | N ONLY          | N ONLY          | ABSENT          |
| P00367     | -2.5            | 1.22058824      | 1.27            | 2.3             | 2.2             | 1.09090909      | 3.18181818      | 1.27272727      | -2.28           | 1.06666667      |
| P00387     | -1.6666667      | -1.8            | -1.50           | 2.5             | 2.33333333      | 10              | 2               | 7               | -1.6875         | -1.16666667     |
| P00390     | -2              | N ONLY          | ABSENT          | T ONLY          | ABSENT          | ABSENT          | T ONLY          | T ONLY          | N ONLY          | ABSENT          |
| P00403     | -6              | N ONLY          | -9.00           | N ONLY          | 1               | -2              | 3               | N ONLY          | -5              | -1.3333333      |
| P00441     | 1.14285714      | -4              | -8.00           | -1.5            | -2.5            | 1               | -3              | 1.5             | -1.5            | 1               |
| P00450     | 1.66666667      | ABSENT          | ABSENT          | T ONLY          | N ONLY          |
| P00488     | N Only          | ABSENT          | ABSENT          | T ONLY          | T ONLY          | ABSENT          | ABSENT          | T ONLY          | 1.33333333      | N ONLY          |
| P00491     | -2              | -1.3333333      | T ONLY          | 1               | T ONLY          | 2               |
| P00492     | -2.3333333      | N ONLY          | -4.50           | -3              | -1.3333333      | N ONLY          | -1.25           | -2              | -24             | -5              |
| P00505     | -9              | -4.2            | -4.33           | -3.2            | 1.5             | -12.333333      | -1.7777778      | -1.1            | -19.2           | -5              |
| P00533     | N Only          | ABSENT          | ABSENT          | T ONLY          | ABSENT          | ABSENT          | T ONLY          | ABSENT          | ABSENT          | ABSENT          |
| P00558     | 1.1             | -1.1176471      | -5.67           | -1.0588235      | 2               | -2.1666667      | 1.875           | 1.21428571      | 1               | -2.75           |
| P00568     | 1.07142857      | -1.2            | 3.78            | 4.25            | 3.5             | 5.25            | 6               | 4               | 2.38095238      | -1.5714286      |
| P00734     | 2               | ABSENT          | ABSENT          | ABSENT          | T ONLY          | T ONLY          | ABSENT          | T ONLY          | T ONLY          | ABSENT          |

| Protein ID | FC<br>104T/104N | FC<br>105T/105N | FC<br>106T/106N | FC<br>111T/111N | FC<br>112T/112N | FC<br>121T/121N | FC<br>347T/347N | FC<br>353T/353N | FC<br>563T/563N | FC<br>537T/537N |
|------------|-----------------|-----------------|-----------------|-----------------|-----------------|-----------------|-----------------|-----------------|-----------------|-----------------|
| P00738     | -1.5714286      | -4              | -3.00           | 3               | 161.5           | 7               | 2.75            | T ONLY          | 2.76190476      | -1.2            |
| P00739     | N Only          | ABSENT          | N ONLY          | 7               | T ONLY          | T ONLY          | 2               | T ONLY          | 2.22222222      | 2.5             |
| P00747     | ABSENT          | ABSENT          | ABSENT          | ABSENT          | T ONLY          | ABSENT          | ABSENT          | T ONLY          | ABSENT          | ABSENT          |
| P00751     | 7               | ABSENT          | ABSENT          | T ONLY          | T ONLY          | T ONLY          | ABSENT          | T ONLY          | T ONLY          | ABSENT          |
| P00846     | -1.5            | N ONLY          | N ONLY          | T ONLY          | T ONLY          | N ONLY          | T ONLY          | ABSENT          | -3              | N ONLY          |
| P00915     | -3              | -3.75           | -1.60           | 1.53846154      | 10              | -2.5            | 4               | T ONLY          | -1.83333333     | 1.63636364      |
| P00918     | -5              | -3.33333333     | -5.00           | 1.3             | 2.42857143      | 2.33333333      | 2.8             | -1.83333333     | -7.5            | 1.17647059      |
| P00966     | ABSENT          | ABSENT          | ABSENT          | T ONLY          | ABSENT          | ABSENT          | ABSENT          | ABSENT          | ABSENT          | ABSENT          |
| P01008     | 8               | ABSENT          | ABSENT          | T ONLY          | ABSENT          |
| P01009     | 1.58333333      | -3              | N ONLY          | 5               | 38              | 6               | 6               | T ONLY          | 5.33333333      | 2               |
| P01011     | 4.25            | 2               | 3.50            | T ONLY          | T ONLY          | T ONLY          | T ONLY          | 3.5             | 5.33333333      | 1.2             |
| P01019     | -1.1818182      | T ONLY          | 4.00            | 5               | 13              | T ONLY          | T ONLY          | T ONLY          | 2.66666667      | ABSENT          |
| P01023     | 3.35185185      | -10             | -6.00           | 2.69230769      | 80.75           | 13.8            | 4               | 13.8            | 9.84615385      | 2               |
| P01024     | 3.4             | -3.5            | 1.00            | 7.6             | 82.33333333     | T ONLY          | 17              | 44              | 18              | 1.14285714      |
| P01031     | ABSENT          | ABSENT          | ABSENT          | T ONLY          | 5               | ABSENT          | N ONLY          | ABSENT          | ABSENT          | N ONLY          |
| P01034     | N Only          | 3               | 2.00            | ABSENT          | 1               | -3              | 2               | 4               | ABSENT          | N ONLY          |
| P01042     | T ONLY          | ABSENT          | ABSENT          | ABSENT          | T ONLY          | T ONLY          | ABSENT          | T ONLY          | ABSENT          | ABSENT          |
| P01111     | -1.6666667      | -1.6666667      | -5.00           | -1.33333333     | N ONLY          | -9              | -2.33333333     | 2               | -2.33333333     | -1.25           |
| P01112     | -1.5            | 1               | -4.00           | -3              | N ONLY          | -6              | -5              | 2               | -3              | -1.125          |
| P01116     | N Only          | -1.33333333     | -4.50           | -3              | ABSENT          | -8              | -2              | 2               | -2.25           | 1.14285714      |
| P01700     | N Only          | ABSENT          | ABSENT          | T ONLY          | T ONLY          | T ONLY          | ABSENT          | T ONLY          | T ONLY          | ABSENT          |
| P01764     | ABSENT          | T ONLY          | ABSENT          |
| P01781     | ABSENT          | ABSENT          | ABSENT          | ABSENT          | T ONLY          | T ONLY          | ABSENT          | ABSENT          | T ONLY          | ABSENT          |
| P01857     | -2.33333333     | T ONLY          | T ONLY          | T ONLY          | 89              | 37              | 1.5             | 22.5            | T ONLY          | N ONLY          |
| P01860     | T ONLY          | ABSENT          | ABSENT          | ABSENT          | T ONLY          | T ONLY          | ABSENT          | T ONLY          | T ONLY          | ABSENT          |
| P01871     | -2              | ABSENT          | N ONLY          | 2               | T ONLY          | 2               | T ONLY          | T ONLY          | ABSENT          | ABSENT          |
| P01876     | 3               | N ONLY          | N ONLY          | 6               | T ONLY          | T ONLY          | T ONLY          | 6               | T ONLY          | N ONLY          |
| P01877     | 3               | N ONLY          | N ONLY          | 6               | T ONLY          | T ONLY          | T ONLY          | 6               | T ONLY          | N ONLY          |
| P01891     | T ONLY          | -2              | ABSENT          | T ONLY          | T ONLY          | ABSENT          | T ONLY          | T ONLY          | T ONLY          | N ONLY          |
| P01903     | ABSENT          |
| P02042     | -3.2916667      | -11.388889      | -3.78           | 1.81538462      | 3.3255814       | -2.0410959      | 1.02150538      | 2.55            | 1.69281046      | -1.0185185      |
| P02452     | ABSENT          | N ONLY          | 4.00            | T ONLY          | -2.6666667      | ABSENT          | ABSENT          | ABSENT          | ABSENT          | ABSENT          |
| P02461     | ABSENT          | ABSENT          | T ONLY          | T ONLY          | 1               | ABSENT          | ABSENT          | ABSENT          | ABSENT          | ABSENT          |
| P02511     | 2.31578947      | -16.25          | 1.91            | 2.50980392      | 1.5             | 7.2             | 2.93333333      | 2.86666667      | 3.27272727      | 2.68085106      |
| P02533     | 1.08536585      | -4.2264151      | -1.62           | -1.1330275      | 1.5046729       | 1.12820513      | 3.10638298      | -1.41333333     | -1.5            | 1.5             |
| P02538     | -1.4693878      | -5.8235294      | -1.49           | -1.4334601      | 1.09090909      | -1.4482759      | 1.70707071      | -1.2653061      | -1.0526316      | 1.64285714      |
| P02545     | -1.1666667      | 1.57142857      | 3.67            | 2.25            | -2.83333333     | 21              | 8.5             | -1.64           | -1.6666667      | 1               |
| P02549     | ABSENT          | T ONLY          | ABSENT          |
| P02647     | 3.76190476      | N ONLY          | N ONLY          | 8               | 131             | 9.2             | 2               | 11.6666667      | 6.25            | -4              |
| P02649     | -1.3            | 4.6             | 9.00            | ABSENT          | 35              | 1.44444444      | 2.66666667      | 37              | 1.48717949      | 1.2             |
| P02652     | 1.625           | ABSENT          | ABSENT          | T ONLY          | 13.33333333     | N ONLY          |
| P02655     | T ONLY          | ABSENT          | ABSENT          | ABSENT          | T ONLY          | ABSENT          | ABSENT          | ABSENT          | ABSENT          | ABSENT          |
| P02671     | T ONLY          | N ONLY          | T ONLY          | T ONLY          | T ONLY          | T ONLY          | -4              | T ONLY          | T ONLY          | 2               |
| P02675     | 1.4             | N ONLY          | ABSENT          | 4               | 109             | 6               | -5              | T ONLY          | 26              | -1.5            |
| P02679     | 3.2             | ABSENT          | N ONLY          | 3               | T ONLY          | 3.5             | -3              | 3               | 49.5555556      | 2               |
| P02686     | -1.5045872      | -11.573034      | 1.75            | -3.2987421      | -1.9104278      | -1.9658537      | 1.26706231      | -8.3910256      | -2.8587329      | 1.02909865      |
| P02689     | -1.2            | -5.6666667      | T ONLY          | 8.66666667      | 1.5             | T ONLY          | 3.5             | 1               | 2               | 1               |
| P02730     | N Only          | ABSENT          | ABSENT          | 2               | T ONLY          | ABSENT          | T ONLY          | T ONLY          | T ONLY          | T ONLY          |
| P02735     | ABSENT          | ABSENT          | ABSENT          | ABSENT          | T ONLY          | ABSENT          | ABSENT          | ABSENT          | ABSENT          | ABSENT          |
| P02741     | ABSENT          | ABSENT          | ABSENT          | ABSENT          | T ONLY          | ABSENT          | ABSENT          | ABSENT          | ABSENT          | T ONLY          |
| P02743     | T ONLY          | ABSENT          | ABSENT          | T ONLY          | T ONLY          | T ONLY          | ABSENT          | ABSENT          | T ONLY          | T ONLY          |
| P02747     | N Only          | ABSENT          | ABSENT          | T ONLY          | T ONLY          | T ONLY          | ABSENT          | T ONLY          | T ONLY          | ABSENT          |
| P02748     | T ONLY          | ABSENT          | ABSENT          | T ONLY          | T ONLY          | ABSENT          | ABSENT          | ABSENT          | T ONLY          | ABSENT          |
| P02749     | 1               | ABSENT          | ABSENT          | T ONLY          | T ONLY          | T ONLY          | ABSENT          | T ONLY          | T ONLY          | ABSENT          |
| P02750     | ABSENT          | ABSENT          | ABSENT          | T ONLY          | T ONLY          | T ONLY          | ABSENT          | T ONLY          | ABSENT          | ABSENT          |
| P02751     | T ONLY          | N ONLY          | ABSENT          | T ONLY          | T ONLY          | T ONLY          | ABSENT          | T ONLY          | T ONLY          | T ONLY          |
| P02763     | 6.33333333      | ABSENT          | ABSENT          | T ONLY          | -1.5            |
| P02766     | 4.5             | N ONLY          | N ONLY          | 1               | 5.5             | T ONLY          | N ONLY          | T ONLY          | T ONLY          | N ONLY          |
| P02768     | 1.43865031      | -1.7            | 1.50            | 10.3            | 48.8181818      | 11.875          | 3.81395349      | 16.6785714      | 7.32510288      | 1.05494505      |
| P02786     | T ONLY          | ABSENT          | ABSENT          | ABSENT          | ABSENT          | T ONLY          | T ONLY          | ABSENT          | N ONLY          | ABSENT          |
| P02787     | 2.42105263      | -2.75           | 3.67            | 2.7             | 24.5454545      | 12.1111111      | 6               | 4.84615385      | 6.66666667      | -1.8            |
| P02788     | ABSENT          | T ONLY          | N ONLY          |

| Protein ID | FC<br>104T/104N | FC<br>105T/105N | FC<br>106T/106N | FC<br>111T/111N | FC<br>112T/112N | FC<br>121T/121N | FC<br>347T/347N | FC<br>353T/353N | FC<br>563T/563N | FC<br>537T/537N |
|------------|-----------------|-----------------|-----------------|-----------------|-----------------|-----------------|-----------------|-----------------|-----------------|-----------------|
| P02790     | 1.66666667      | N ONLY          | N ONLY          | 4               | 22              | T ONLY          | T ONLY          | T ONLY          | T ONLY          | ABSENT          |
| P02792     | 3               | 1               | N ONLY          | -1.6666667      | -2              | N ONLY          | N ONLY          | 1               | 5.33333333      | 1               |
| P02794     | 1.25            | -8              | -6.00           | -2.3333333      | -5.6666667      | -7              | -2.3333333      | -11             | 1.2             | -1.3571429      |
| P04003     | T ONLY          | ABSENT          | ABSENT          | ABSENT          | T ONLY          | ABSENT          | ABSENT          | ABSENT          | ABSENT          | ABSENT          |
| P04004     | ABSENT          | ABSENT          | ABSENT          | ABSENT          | T ONLY          | T ONLY          | N ONLY          | T ONLY          | T ONLY          | ABSENT          |
| P04040     | -2              | N ONLY          | N ONLY          | T ONLY          | 1.66666667      | 4               |
| P04075     | -1.2777778      | -4.8571429      | -2.00           | 1.36842105      | 1.14285714      | -2.2352941      | -1.35           | 1.22727273      | -1.9772727      | -3.5833333      |
| P04080     | -6              | N ONLY          | 1.17            | 1.75            | 2               | 2               | 3               | 1.5             | 6.66666667      | -1.5            |
| P04083     | 4.66666667      | -6.5            | T ONLY          | 7.66666667      | 6               | 21              | T ONLY          | 7               | 7.33333333      | 12              |
| P04114     | T ONLY          | ABSENT          | ABSENT          | 1               | T ONLY          | ABSENT          | T ONLY          | ABSENT          | T ONLY          | ABSENT          |
| P04156     | N Only          | ABSENT          | 1.00            | N ONLY          | -2              | N ONLY          |
| P04179     | 1.25            | -2              | -1.17           | 3               | 11              | -3              | 2.5             | -2              | 1.4             | -2.25           |
| P04181     | ABSENT          | ABSENT          | ABSENT          | ABSENT          | ABSENT          | N ONLY          | ABSENT          | N ONLY          | ABSENT          | ABSENT          |
| P04208     | N Only          | ABSENT          | ABSENT          | T ONLY          | T ONLY          | T ONLY          | ABSENT          | T ONLY          | T ONLY          | ABSENT          |
| P04217     | 1               | ABSENT          | ABSENT          | T ONLY          | ABSENT          |
| P04259     | -1.2689655      | -4.6075949      | -1.54           | -1.160221       | -1.0550459      | -1.3272727      | 1.61904762      | -1.2727273      | -1.4130435      | 1.23809524      |
| P04264     | -1.0800712      | -3.1246377      | -1.75           | 1.48798989      | 1.01662404      | -1.1123986      | 1.43159923      | -1.0052356      | -1.5            | 1.33112583      |
| P04275     | ABSENT          | ABSENT          | ABSENT          | T ONLY          | T ONLY          | ABSENT          | ABSENT          | ABSENT          | N ONLY          | ABSENT          |
| P04350     | -1.9919355      | -1.3107345      | -1.25           | -1.3209459      | -2.1827957      | -3.537415       | -1.0247253      | -2.7928571      | -4.0732218      | -3.5324074      |
| P04406     | 1.15555556      | -1.7761194      | 2.00            | -1.5            | -1.2            | -1.4137931      | 1.02352941      | 1.26984127      | -1.2218543      | -2.4772727      |
| P04439     | T ONLY          | -2              | ABSENT          | T ONLY          | T ONLY          | ABSENT          | T ONLY          | T ONLY          | T ONLY          | N ONLY          |
| P04632     | 5               | -5              | T ONLY          | 2               | 2               | T ONLY          | 1               | T ONLY          | 1.33333333      | N ONLY          |
| P04792     | -2.75           | 2.71428571      | 18.33           | 22              | 8               | 3               | 8.5             | 3.33333333      | 1.37254902      | 1.8             |
| P04843     | 1               | 7               | N ONLY          | T ONLY          | ABSENT          | T ONLY          | T ONLY          | ABSENT          | ABSENT          | N ONLY          |
| P04844     | ABSENT          | N ONLY          |
| P04899     | 1.33333333      | -2              | -4.75           | -3.25           | -1.2            | -15             | -1.625          | 1               | -10.75          | -10.5           |
| P05023     | -2.7619048      | -4.8333333      | -2.48           | -3.48           | -1.4            | -6.6            | -1.3142857      | -2.9090909      | -10.826087      | -4.0833333      |
| P05026     | -6.5            | N ONLY          | -13.00          | -2.6666667      | 1.28571429      | -7.25           | -1.05           | -3.5            | N ONLY          | -10.25          |
| P05090     | N Only          | -4              | T ONLY          | 1.4             | 3.75            | T ONLY          | -2              | 1.6             | 2               | N ONLY          |
| P05091     | 1.33333333      | 1.66666667      | ABSENT          | 1.66666667      | -1.5            | 1               | 2.8             | 1.4             | -1.5            | -3.1666667      |
| P05109     | ABSENT          | ABSENT          | ABSENT          | N ONLY          | T ONLY          | ABSENT          | ABSENT          | T ONLY          | ABSENT          | ABSENT          |
| P05114     | T ONLY          | T ONLY          | ABSENT          | T ONLY          | ABSENT          | T ONLY          | ABSENT          | T ONLY          | T ONLY          | ABSENT          |
| P05129     | ABSENT          | ABSENT          | N ONLY          | ABSENT          | N ONLY          | N ONLY          | 1               | N ONLY          | N ONLY          | N ONLY          |
| P05141     | -1.0540541      | -5              | -4.09           | -1.2758621      | 2.16666667      | -6.1666667      | -1.7241379      | 1.25            | -6.075          | -5.0555556      |
| P05155     | 1.66666667      | N ONLY          | ABSENT          | T ONLY          | 2               |
| P05156     | T ONLY          | ABSENT          | ABSENT          | ABSENT          | T ONLY          | T ONLY          | ABSENT          | ABSENT          | ABSENT          | ABSENT          |
| P05161     | 1.5             | N ONLY          | ABSENT          | T ONLY          | ABSENT          | T ONLY          | ABSENT          | T ONLY          | T ONLY          | ABSENT          |
| P05164     | ABSENT          | T ONLY          | T ONLY          | ABSENT          |
| P05165     | ABSENT          | 1               | N ONLY          | N ONLY          | ABSENT          | -3              | 5               | N ONLY          | N ONLY          | N ONLY          |
| P05166     | ABSENT          |
| P05198     | 2               | ABSENT          | N ONLY          | ABSENT          | T ONLY          | 1               | ABSENT          | T ONLY          | -1.5            | 1               |
| P05387     | 1.22222222      | -2              | N ONLY          | T ONLY          | 1.66666667      | -2              | T ONLY          | 4               | -4.5            | N ONLY          |
| P05388     | 1.4             | 1               | 4.00            | 2.83333333      | 1               | 1.5             | 2               | 3               | -2.5            | -1.5            |
| P05413     | 1               | N ONLY          | -6              | N ONLY          | N ONLY          | -4.5            |
| P05455     | -2              | 1               | N ONLY          | T ONLY          | ABSENT          | T ONLY          | T ONLY          | 2               | ABSENT          | 1               |
| P05534     | T ONLY          | -2              | ABSENT          | T ONLY          | T ONLY          | ABSENT          | T ONLY          | T ONLY          | T ONLY          | N ONLY          |
| P05546     | T ONLY          | ABSENT          | ABSENT          | ABSENT          | T ONLY          | ABSENT          | ABSENT          | ABSENT          | T ONLY          | ABSENT          |
| P05556     | ABSENT          | ABSENT          | T ONLY          | T ONLY          | T ONLY          | ABSENT          | T ONLY          | ABSENT          | T ONLY          | 4               |
| P05771     | T ONLY          | 1               | -4.50           | -5              | N ONLY          | N ONLY          | -2.6666667      | N ONLY          | N ONLY          | N ONLY          |
| P05783     | N Only          | N ONLY          | -9.00           | N ONLY          | N ONLY          | ABSENT          | N ONLY          | ABSENT          | 2.66666667      | T ONLY          |
| P05937     | N Only          | N ONLY          | -3.00           | 7               | 1.5             | 1.25            | 2.5             | N ONLY          | -15             | N ONLY          |
| P06241     | N Only          | 3               | T ONLY          | T ONLY          | N ONLY          | -2              | -4              | 1.5             | -3              | N ONLY          |
| P06396     | -1.9            | -1.2608696      | 4.67            | 1.25            | -1.3076923      | 2               | 3.25            | -2.8181818      | 1.16666667      | -2.5            |
| P06454     | 3               | -1.6666667      | ABSENT          | 6               | 3               | T ONLY          | 2               | 1.5             | -1.5            | N ONLY          |
| P06493     | ABSENT          | ABSENT          | ABSENT          | T ONLY          | ABSENT          | ABSENT          | ABSENT          | T ONLY          | ABSENT          | ABSENT          |
| P06576     | -1.7380952      | -1.2666667      | -7.75           | -1.0344828      | 1.84            | -3.32           | 1.01176471      | 1.75            | -8.4285714      | -2.1774194      |
| P06681     | ABSENT          | ABSENT          | ABSENT          | ABSENT          | T ONLY          | ABSENT          | ABSENT          | T ONLY          | ABSENT          | ABSENT          |
| P06702     | T ONLY          | ABSENT          | ABSENT          | N ONLY          | T ONLY          | T ONLY          | ABSENT          | T ONLY          | T ONLY          | ABSENT          |
| P06703     | N Only          | -10             | T ONLY          | 12              | T ONLY          | ABSENT          | 3               | 4               | 2               | ABSENT          |
| P06727     | T ONLY          | ABSENT          | ABSENT          | ABSENT          | T ONLY          | ABSENT          | ABSENT          | ABSENT          | T ONLY          | ABSENT          |
| P06732     | 1               | ABSENT          | N ONLY          | N ONLY          | ABSENT          | N ONLY          | N ONLY          | N ONLY          | ABSENT          | ABSENT          |
| P06733     | 1.19148936      | -1.3076923      | -1.55           | 2.2             | 1.2195122       | -1.0487805      | 1.75            | 1.38709677      | 1.14393939      | -2              |

| Protein ID | FC 104T/104N | FC 105T/105N | FC 106T/106N | FC 111T/111N | FC 112T/112N | FC 121T/121N | FC 347T/347N | FC 353T/353N | FC 563T/563N | FC 537T/537N |
|------------|--------------|--------------|--------------|--------------|--------------|--------------|--------------|--------------|--------------|--------------|
| P06737     | -5           | -6           | 3.00         | 2            | N ONLY       | 1            | 4            | 5            | -2.25        | -2           |
| P06744     | -1.5         | -2           | -2.00        | 1.5          | 1.33333333   | -3           | 1            | 1            | -4.8         | -1.75        |
| P06748     | -2           | 1.5          | T ONLY       | T ONLY       | 2            | T ONLY       | T ONLY       | T ONLY       | -1.5         | T ONLY       |
| P06753     | -1.08333333  | -1.33333333  | 1.70         | 2            | 2            | 1.0625       | 1.33333333   | 1.2          | -1.2391304   | 1.55555556   |
| P06756     | N Only       | ABSENT       | ABSENT       | ABSENT       | ABSENT       | T ONLY       | ABSENT       | ABSENT       | ABSENT       | ABSENT       |
| P07093     | ABSENT       | T ONLY       | ABSENT       | ABSENT       |
| P07099     | T ONLY       | T ONLY       | ABSENT       | 5            | T ONLY       | T ONLY       | T ONLY       | 2            | -1.5         | N ONLY       |
| P07108     | -1.875       | -17          | 3.50         | 7            | 2.5          | 1            | 1.33333333   | 6.5          | 4.83333333   | 2            |
| P07195     | -1.5405405   | 1.05263158   | 2.63         | 1.07692308   | 1.21875      | -1.3255814   | 2.36666667   | 2.11538462   | -2.0555556   | -1.7368421   |
| P07196     | -1.9761905   | -41.75       | 1.96         | -4.8709677   | -1.02        | -3.08333333  | 2.2          | -179         | -3.3214286   | -1.0877193   |
| P07197     | -2.0212766   | -149         | 1.63         | -9.2352941   | -1.6410256   | -9.25        | 3.43396226   | -193         | -2.1465517   | -1.1145038   |
| P07203     | 1.5          | -2           | 1.00         | 1.75         | 10           | -1.4         | 2            | T ONLY       | 1.11111111   | 1.5          |
| P07205     | N Only       | -1.33333333  | N ONLY       | N ONLY       | T ONLY       | 1            | T ONLY       | 4            | -1.5         | N ONLY       |
| P07237     | -1.33333333  | 14           | ABSENT       | 8.5          | 3.5          | 2.66666667   | 5            | T ONLY       | 1.73333333   | 1.42857143   |
| P07305     | -1.3529412   | 3.33333333   | 4.00         | 11           | 1.5          | 8            | 2.33333333   | -2.5         | 1.55555556   | -9           |
| P07311     | 1            | N ONLY       | ABSENT       | ABSENT       | T ONLY       | N ONLY       | N ONLY       | ABSENT       | ABSENT       | N ONLY       |
| P07339     | 1.5          | 1            | -1.67        | 1            | 3            | 2            | 1.33333333   | 3            | -9           | N ONLY       |
| P07355     | 1.63636364   | -16          | T ONLY       | 5.33333333   | T ONLY       | 12           | 20           | 2.5          | 7.33333333   | 4.66666667   |
| P07384     | 1            | -1.6666667   | 1.67         | 1            | N ONLY       | ABSENT       | T ONLY       | -3           | 1.33333333   | N ONLY       |
| P07437     | -1.6321244   | -1.2418033   | -1.13        | -1.0504808   | -1.8477366   | -2.8266667   | 1.06398104   | -2.2912621   | -3.4439252   | -2.8783784   |
| P07451     | 2            | ABSENT       | ABSENT       | T ONLY       | T ONLY       | T ONLY       | ABSENT       | T ONLY       | ABSENT       | ABSENT       |
| P07476     | ABSENT       | ABSENT       | ABSENT       | N ONLY       | ABSENT       | ABSENT       | ABSENT       | ABSENT       | ABSENT       | ABSENT       |
| P07585     | ABSENT       | T ONLY       | ABSENT       | ABSENT       |
| P07602     | N Only       | N ONLY       | ABSENT       | N ONLY       | ABSENT       | ABSENT       | ABSENT       | ABSENT       | -1.5         | -1.5         |
| P07686     | -2           | ABSENT       | ABSENT       | T ONLY       | ABSENT       | ABSENT       | ABSENT       | ABSENT       | T ONLY       | ABSENT       |
| P07737     | -3           | 2            | 4.00         | T ONLY       | 10           | 1.4          | 4            | 1.25         | 1.33333333   | N ONLY       |
| P07738     | ABSENT       | 2            | ABSENT       | ABSENT       | ABSENT       | T ONLY       | ABSENT       | ABSENT       | ABSENT       | ABSENT       |
| P07741     | -1.75        | N ONLY       | 2.00         | 2            | -1.5         | 3            | 1.5          | T ONLY       | 4            | T ONLY       |
| P07814     | 4            | 4            | ABSENT       | T ONLY       | T ONLY       | 4            | ABSENT       | T ONLY       | ABSENT       | ABSENT       |
| P07900     | -1.2769231   | 1.52083333   | 1.87         | 2.03508772   | 1.21428571   | -1.2142857   | 1.55555556   | 1.37777778   | -2.2105263   | -3.6052632   |
| P07910     | 1.9375       | 3.2          | -3.00        | 9.33333333   | -2           | 1.66666667   | 2            | 1.66666667   | -5.625       | -2           |
| P07942     | ABSENT       |
| P07947     | N Only       | 3            | T ONLY       | T ONLY       | N ONLY       | -2           | -4           | 1.5          | -3           | N ONLY       |
| P07951     | 1.33333333   | -2           | 1.63         | 1.71428571   | 3.6          | 2            | 1.16666667   | 1.42857143   | -1.33333333  | 2.58823529   |
| P07954     | 1.25         | 1.75         | -4.00        | 2            | 2            | 1.2          | 1            | 1.66666667   | -9.75        | -2           |
| P08107     | -1.8965517   | 1.29411765   | 1.18         | 1.9047619    | -1.5454545   | 1.36363636   | 2.27777778   | 1.36363636   | -1.5254237   | -5.875       |
| P08123     | ABSENT       | N ONLY       | 1.00         | T ONLY       | -1.25        | ABSENT       | ABSENT       | ABSENT       | T ONLY       | T ONLY       |
| P08133     | -3           | 1            | 1.06         | 2.30769231   | -2.125       | 1.07692308   | 4.90909091   | 2.06666667   | -1.0344828   | -1.1785714   |
| P08185     | T ONLY       | ABSENT       | ABSENT       | ABSENT       | T ONLY       | ABSENT       | ABSENT       | ABSENT       | ABSENT       | ABSENT       |
| P08195     | -4           | -5           | -1.50        | -1.4         | N ONLY       | -2.5         | 1.83333333   | 9            | -8           | -1.875       |
| P08237     | -2.4         | -1.625       | -2.00        | -1.33333333  | -2.33333333  | -3.6666667   | 1.55555556   | 6            | -1.5         | -3.4         |
| P08238     | -1.203125    | 1.80434783   | 1.31         | 3.55102041   | 1.17021277   | 1.11904762   | 1.8372093    | 1.60465116   | -2.1880734   | -1.8653846   |
| P08247     | -10          | N ONLY       | -21.00       | N ONLY       | N ONLY       | N ONLY       | -6.25        | N ONLY       | N ONLY       | -13.5        |
| P08559     | -5           | -1.25        | -6.00        | 3            | ABSENT       | -4           | 1.625        | 1.5          | N ONLY       | N ONLY       |
| P08572     | 3            | ABSENT       | 1.00         | N ONLY       | 7            | 1            | T ONLY       | T ONLY       | T ONLY       | T ONLY       |
| P08574     | N Only       | N ONLY       | -3.00        | -3           | 1            | N ONLY       | N ONLY       | ABSENT       | N ONLY       | -3           |
| P08590     | ABSENT       | ABSENT       | ABSENT       | N ONLY       | ABSENT       | ABSENT       | ABSENT       | ABSENT       | ABSENT       | ABSENT       |
| P08603     | T ONLY       | ABSENT       | ABSENT       | T ONLY       | T ONLY       | ABSENT       | ABSENT       | ABSENT       | T ONLY       | ABSENT       |
| P08670     | 2.96116505   | 3.0952381    | 28.09        | 50.8235294   | 15.83333333  | 34.2727273   | 9.42857143   | 19.65        | 11.4666667   | 5.04166667   |
| P08708     | 2.5          | -2           | 1.00         | T ONLY       | ABSENT       | 2            | 1            | T ONLY       | 1.11111111   | 2            |
| P08727     | -1.25        | -4.2         | -2.27        | 1            | 1.2972973    | -1.3142857   | 3.38461538   | -1.3846154   | -2.1666667   | 4.5          |
| P08754     | 1.33333333   | -2           | -8.50        | -3.6666667   | -1.25        | N ONLY       | -1.7142857   | 1.5          | -20.5        | N ONLY       |
| P08758     | 1.41666667   | 1.33898305   | 9.08         | 6            | 2.05263158   | 4.71428571   | 4.7          | 6.25         | 3.69230769   | 2.47058824   |
| P08779     | -1.109589    | -4.173913    | -1.36        | 1            | 1.51020408   | 1.12686567   | 3.30952381   | -1.5606061   | -1.5576923   | 1.55555556   |
| P08865     | 3            | 4.5          | T ONLY       | T ONLY       | T ONLY       | 4            | T ONLY       | 5            | -3           | N ONLY       |
| P08962     | ABSENT       |
| P09104     | -2.6         | -3.6666667   | -7.50        | -9.33333333  | -1.8571429   | -8           | -2           | -2           | -5.6052632   | -2.75        |
| P09110     | 1            | ABSENT       | ABSENT       | T ONLY       | ABSENT       | ABSENT       | T ONLY       | T ONLY       | T ONLY       | ABSENT       |
| P09132     | 1            | T ONLY       | ABSENT       | T ONLY       | T ONLY       | 2            | ABSENT       | T ONLY       | -1.5         | ABSENT       |
| P09211     | 1.2          | N ONLY       | T ONLY       | 1.4          | -1.5         | 2.5          | 1.5          | ABSENT       | T ONLY       | N ONLY       |
| P09234     | 2            | ABSENT       | ABSENT       | T ONLY       | ABSENT       | ABSENT       | ABSENT       | ABSENT       | ABSENT       | ABSENT       |
| P09382     | -3           | -3.33333333  | 8.00         | 2            | 1.66666667   | 2            | 3            | 8            | 8            | N ONLY       |



| Protein ID | FC<br>104T/104N | FC<br>105T/105N | FC<br>106T/106N | FC<br>111T/111N | FC<br>112T/112N | FC<br>121T/121N | FC<br>347T/347N | FC<br>353T/353N | FC<br>563T/563N | FC<br>537T/537N |
|------------|-----------------|-----------------|-----------------|-----------------|-----------------|-----------------|-----------------|-----------------|-----------------|-----------------|
| P09417     | -3              | -3              | N ONLY          | -4              | -3              | ABSENT          | -2              | -3              | 2.66666667      | N ONLY          |
| P09429     | 1.5             | 3.5             | 1.00            | 4               | 1               | 2               | T ONLY          | 3               | T ONLY          | N ONLY          |
| P09455     | -1.6666667      | -2              | -1.50           | T ONLY          | T ONLY          | T ONLY          | 1               | 11              | T ONLY          | N ONLY          |
| P09471     | -2.6666667      | -2.7777778      | -5.00           | -14             | -3.25           | -29.5           | -3.1176471      | -1.5            | -10.269231      | -12.5           |
| P09486     | ABSENT          | ABSENT          | T ONLY          | T ONLY          | ABSENT          | ABSENT          | T ONLY          | T ONLY          | ABSENT          | ABSENT          |
| P09488     | -1.6666667      | 1.07692308      | T ONLY          | 1.5             | 2               | T ONLY          | ABSENT          | T ONLY          | 1.33333333      | 4               |
| P09493     | 1               | -1.8333333      | 1.67            | 1.57142857      | 3.5             | 1.33333333      | 1.6             | 1.14285714      | -1.5            | 1.55555556      |
| P09496     | N Only          | N ONLY          | -4.00           | -2              | 2               | -5              | N ONLY          | N ONLY          | -3              | -2.5            |
| P09497     | N Only          | 1               | N ONLY          | N ONLY          | 1               | N ONLY          | N ONLY          | N ONLY          | N ONLY          | ABSENT          |
| P09525     | -1.2            | 1.33333333      | 10.00           | 3               | 5               | T ONLY          | T ONLY          | 2.5             | T ONLY          | 2               |
| P09543     | -2.5555556      | -11.6666667     | -2.13           | -10.1           | -3.0441176      | -7.6666667      | 1.12            | -52.6           | -11.8125        | -1.9666667      |
| P09619     | ABSENT          |
| P09622     | -2.5            | 1.75            | -1.50           | 1               | 1               | N ONLY          | -1.6666667      | -4              | -18             | -1.625          |
| P09651     | 1.8             | 3               | -4.00           | 6.8             | 2               | 3.4             | 1.83333333      | 24              | -9              | -1.5            |
| P09661     | ABSENT          | T ONLY          | ABSENT          | T ONLY          | ABSENT          | ABSENT          | ABSENT          | T ONLY          | ABSENT          | T ONLY          |
| P09669     | N Only          | -1.6666667      | N ONLY          | N ONLY          | T ONLY          | -3              | -3              | T ONLY          | -11.25          | N ONLY          |
| P09874     | -1.0909091      | 6               | N ONLY          | 7               | T ONLY          | T ONLY          | 3               | 1               | T ONLY          | 4               |
| P09914     | N Only          | -2              | ABSENT          | T ONLY          | ABSENT          | ABSENT          | T ONLY          | ABSENT          | T ONLY          | ABSENT          |
| P09936     | -3.8333333      | -1.4736842      | -2.25           | -1.4117647      | 1               | -1.5            | -1.2727273      | 1               | -16.125         | -2.8            |
| P09960     | N Only          | T ONLY          | -2.00           | T ONLY          | ABSENT          | 1               | 2               | N ONLY          | T ONLY          | N ONLY          |
| P09972     | -1.8709677      | -5.2            | -1.07           | -2.9            | 2               | -1.5714286      | 1.18918919      | 1.26666667      | -1.5857143      | -1.3333333      |
| POC0L4     | -1.6923077      | 2.4             | T ONLY          | 3               | 16              | T ONLY          | T ONLY          | 12              | T ONLY          | N ONLY          |
| POC0L5     | -1.6923077      | 2.4             | T ONLY          | 3               | 16              | T ONLY          | T ONLY          | 12              | T ONLY          | N ONLY          |
| POC7P4     | -3              | -3              | -1.50           | 2               | -2              | -2.5            | N ONLY          | T ONLY          | -6              | N ONLY          |
| POCW22     | 2.5             | -2              | 1.00            | T ONLY          | ABSENT          | 2               | 1               | T ONLY          | 1.11111111      | 2               |
| P10114     | N Only          | N ONLY          | -8.00           | 1.33333333      | -2              | -6              | -7              | N ONLY          | -9.5            | -3.25           |
| P10155     | -1.1666667      | 7               | -2.00           | T ONLY          | 1               | T ONLY          | 5               | T ONLY          | ABSENT          | T ONLY          |
| P10253     | T ONLY          | ABSENT          | ABSENT          | ABSENT          | ABSENT          | T ONLY          | ABSENT          | T ONLY          | T ONLY          | ABSENT          |
| P10301     | ABSENT          | N ONLY          | T ONLY          | ABSENT          | ABSENT          | ABSENT          | T ONLY          | ABSENT          | ABSENT          | N ONLY          |
| P10412     | 1.39285714      | 7.06666667      | 3.50            | 2.66666667      | -1.5454545      | 3.81818182      | 6.2             | 2.31578947      | -1.1707317      | -1.6290323      |
| P10451     | T ONLY          | ABSENT          | N ONLY          | ABSENT          |
| P10515     | ABSENT          | ABSENT          | N ONLY          | ABSENT          | ABSENT          | N ONLY          | T ONLY          | ABSENT          | ABSENT          | N ONLY          |
| P10599     | -1.6666667      | -5.6666667      | -3.50           | 7.5             | 1.875           | -1.2727273      | 1.75            | 2               | 1.55555556      | N ONLY          |
| P10606     | N Only          | T ONLY          | N ONLY          | T ONLY          | 1               | N ONLY          | 1               | T ONLY          | -12             | -6              |
| P10620     | 6               | N ONLY          | 1.00            | T ONLY          | T ONLY          | T ONLY          | ABSENT          | ABSENT          | T ONLY          | T ONLY          |
| P10636     | N Only          | N ONLY          | -7.50           | -25             | -15             | -10.285714      | -13.333333      | -7              | -44.5           | -22.5           |
| P10644     | ABSENT          | ABSENT          | ABSENT          | 2               | ABSENT          | T ONLY          | T ONLY          | ABSENT          | T ONLY          | N ONLY          |
| P10768     | -2              | -1.4            | 3.00            | 1               | 1               | 5               | 3               | 2.5             | 2.16666667      | -4              |
| P10809     | -3.8333333      | 1.23529412      | -2.10           | 1.73684211      | 1.33333333      | 1.33333333      | 1.92857143      | 2.41666667      | -3.5833333      | -3.0714286      |
| P10909     | 1.27272727      | 2               | 2.00            | 1.33333333      | 10              | 5               | 9               | 15              | 56              | 2               |
| P10915     | ABSENT          | ABSENT          | N ONLY          | ABSENT          | ABSENT          | N ONLY          | ABSENT          | ABSENT          | N ONLY          | ABSENT          |
| P11021     | -1.3076923      | 1.23076923      | 1.25            | 3.22222222      | 2.8             | 1.5             | 2.28571429      | 1.55555556      | 1               | -3.75           |
| P11047     | 11              | N ONLY          | T ONLY          | T ONLY          | T ONLY          | ABSENT          | T ONLY          | T ONLY          | T ONLY          | T ONLY          |
| P11055     | ABSENT          | ABSENT          | ABSENT          | N ONLY          | ABSENT          | ABSENT          | ABSENT          | ABSENT          | ABSENT          | ABSENT          |
| P11137     | -7.5            | -4              | N ONLY          | 1.33333333      | ABSENT          | -23.333333      | -1.6190476      | T ONLY          | -124.5          | -12.625         |
| P11142     | -1.2280702      | 1.421875        | 1.14            | 3.32432432      | -1.1276596      | -1.3793103      | 1.48333333      | -1.4571429      | -2.7037037      | -3.0555556      |
| P11166     | 2               | N ONLY          | ABSENT          | ABSENT          | T ONLY          | ABSENT          | 1               | ABSENT          | 1.46666667      | T ONLY          |
| P11177     | -2              | 1.5             | -2.00           | -2              | 3               | -9              | 6               | 1               | -5.25           | N ONLY          |
| P11216     | -1.7142857      | -13             | 1.92            | -1.625          | -1.4            | -4              | 2.16666667      | 3.4             | 1.15942029      | -1.6818182      |
| P11217     | -2              | -8              | 5.50            | -1.6666667      | -1.5            | N ONLY          | 3.75            | 1.2             | -2.1            | 1               |
| P11233     | -4              | 1               | -2.50           | -1.5            | -3              | -3              | -3              | 1               | -3              | N ONLY          |
| P11234     | -2.5            | -1.3333333      | -2.00           | 1               | -1.5            | 1               | -3              | -2              | -4.5            | N ONLY          |
| P11277     | -4              | -6              | 1.50            | -1.5            | T ONLY          | N ONLY          | 6               | 2               | -1.2            | N ONLY          |
| P11279     | N Only          | ABSENT          | ABSENT          | N ONLY          | N ONLY          | ABSENT          | T ONLY          | ABSENT          | T ONLY          | N ONLY          |
| P11310     | ABSENT          | T ONLY          | ABSENT          | T ONLY          | ABSENT          | ABSENT          | ABSENT          | ABSENT          | ABSENT          | ABSENT          |
| P11387     | N Only          | ABSENT          | ABSENT          | T ONLY          | ABSENT          | ABSENT          | ABSENT          | ABSENT          | ABSENT          | ABSENT          |
| P11388     | T ONLY          | ABSENT          | ABSENT          | T ONLY          | ABSENT          | ABSENT          | ABSENT          | ABSENT          | ABSENT          | ABSENT          |
| P11413     | ABSENT          | ABSENT          | ABSENT          | T ONLY          | ABSENT          | ABSENT          | ABSENT          | 1               | ABSENT          | ABSENT          |
| P11498     | ABSENT          | N ONLY          | ABSENT          | N ONLY          | N ONLY          | T ONLY          | T ONLY          | ABSENT          | T ONLY          | ABSENT          |
| P11532     | ABSENT          | ABSENT          | ABSENT          | ABSENT          | ABSENT          | T ONLY          | ABSENT          | ABSENT          | ABSENT          | ABSENT          |
| P11586     | 1.42857143      | 1.5             | 4.50            | 1.33333333      | 2               | T ONLY          | 3               | 2.5             | T ONLY          | N ONLY          |
| P11766     | N Only          | T ONLY          | ABSENT          | ABSENT          | ABSENT          | ABSENT          | ABSENT          | T ONLY          | T ONLY          | N ONLY          |

| Protein ID | FC<br>104T/104N | FC<br>105T/105N | FC<br>106T/106N | FC<br>111T/111N | FC<br>112T/112N | FC<br>121T/121N | FC<br>347T/347N | FC<br>353T/353N | FC<br>563T/563N | FC<br>537T/537N |
|------------|-----------------|-----------------|-----------------|-----------------|-----------------|-----------------|-----------------|-----------------|-----------------|-----------------|
| P11908     | N Only          | T ONLY          | ABSENT          | ABSENT          | ABSENT          | ABSENT          | ABSENT          | 1               | -1.5            | ABSENT          |
| P11940     | T ONLY          | 6               | -2.00           | T ONLY          | -2              | T ONLY          | 3               | 1               | N ONLY          | N ONLY          |
| P12004     | T ONLY          | ABSENT          |
| P12035     | -3.0909091      | -17.2           | -2.90           | -1.7254902      | 1.77272727      | 1.13513514      | 1.31578947      | -1.0588235      | 1.06666667      | 4               |
| P12036     | -4              | -78             | 6.50            | -2.5555556      | 2.47619048      | -1.25           | 5.75            | -35             | 1.36363636      | 1.79130435      |
| P12081     | ABSENT          | ABSENT          | ABSENT          | T ONLY          | ABSENT          | T ONLY          | ABSENT          | ABSENT          | ABSENT          | ABSENT          |
| P12107     | ABSENT          |
| P12109     | T ONLY          | N ONLY          | ABSENT          | T ONLY          | T ONLY          | T ONLY          | ABSENT          | T ONLY          | T ONLY          | T ONLY          |
| P12110     | T ONLY          | N ONLY          | ABSENT          | T ONLY          | T ONLY          | ABSENT          | ABSENT          | T ONLY          | T ONLY          | T ONLY          |
| P12111     | T ONLY          | N ONLY          | ABSENT          | T ONLY          | T ONLY          | ABSENT          | ABSENT          | T ONLY          | T ONLY          | T ONLY          |
| P12235     | -1.25           | -4              | -9.50           | -2.6875         | 1.375           | -5.5            | -2.1851852      | -1.1666667      | -5.8571429      | -5.1666667      |
| P12236     | -1.3125         | -4.8            | -8.50           | -1.9545455      | 1.71428571      | -4.3            | -1.7741935      | -1.2            | -6.45           | -5.5            |
| P12268     | 3               | T ONLY          | ABSENT          | T ONLY          | ABSENT          | T ONLY          | T ONLY          | T ONLY          | T ONLY          | ABSENT          |
| P12270     | T ONLY          | ABSENT          | ABSENT          | T ONLY          | ABSENT          | T ONLY          | T ONLY          | ABSENT          | ABSENT          | ABSENT          |
| P12277     | -1.7777778      | 1.28571429      | -1.05           | -1.0434783      | -1.0714286      | -4.6666667      | 2.6666667       | -2.4285714      | -2.125          | -1.625          |
| P12429     | ABSENT          | ABSENT          | ABSENT          | ABSENT          | T ONLY          | ABSENT          | ABSENT          | N ONLY          | 2.6666667       | N ONLY          |
| P12532     | ABSENT          | ABSENT          | N ONLY          | N ONLY          | ABSENT          | N ONLY          | N ONLY          | ABSENT          | N ONLY          | -2.5            |
| P12814     | 1.75            | -3.6666667      | -3.50           | 1               | 3               | -5.25           | -1.9166667      | 2.5             | -1.1538462      | -3.1666667      |
| P12882     | ABSENT          | ABSENT          | ABSENT          | N ONLY          | ABSENT          | ABSENT          | ABSENT          | ABSENT          | ABSENT          | ABSENT          |
| P12883     | ABSENT          | ABSENT          | ABSENT          | N ONLY          | ABSENT          | ABSENT          | ABSENT          | ABSENT          | ABSENT          | ABSENT          |
| P12931     | N Only          | 3               | T ONLY          | T ONLY          | N ONLY          | -2              | -4              | 2               | -3              | N ONLY          |
| P12955     | N Only          | T ONLY          | T ONLY          | T ONLY          | T ONLY          | 1               | T ONLY          | 2               | ABSENT          | ABSENT          |
| P12956     | -2              | 6               | N ONLY          | T ONLY          | N ONLY          | 5               | 6               | 1.33333333      | ABSENT          | 4               |
| P13010     | -3              | 2.75            | 2.00            | 6               | T ONLY          | T ONLY          | 1.6666667       | 10              | 1.33333333      | -3.5            |
| P13073     | -2.25           | N ONLY          | -5.67           | -1.5            | 2.5             | -4              | -1.3333333      | T ONLY          | -12             | -3.5            |
| P13521     | N Only          | N ONLY          | N ONLY          | ABSENT          | ABSENT          | ABSENT          | N ONLY          | ABSENT          | -6              | N ONLY          |
| P13533     | ABSENT          | ABSENT          | ABSENT          | N ONLY          | ABSENT          | ABSENT          | ABSENT          | ABSENT          | ABSENT          | ABSENT          |
| P13535     | ABSENT          | ABSENT          | ABSENT          | N ONLY          | ABSENT          | ABSENT          | ABSENT          | ABSENT          | ABSENT          | ABSENT          |
| P13591     | -2.1666667      | -1.1515152      | 1.11            | -1.5757576      | -2.6666667      | -3.8888889      | -1.6285714      | -1.0645161      | -3.0833333      | -4.3076923      |
| P13611     | -3.3333333      | -2.5            | -2.00           | -11.5           | -33             | 19.6666667      | 1.28571429      | -5              | -1.7608696      | -5.75           |
| P13637     | -3.5789474      | -5.5454545      | -1.64           | -2.6086957      | 1.02325581      | -6.5789474      | 1.13888889      | -3.75           | -9.4444444      | -1.7153846      |
| P13639     | 1.29411765      | 2.1666667       | 7.00            | 49              | 6.5             | 3.5             | 2               | 5               | 3               | 1.6666667       |
| P13645     | -1.2207084      | -2.9704641      | -1.79           | 1.49905838      | 1.10971223      | 1.13836478      | 1.49677419      | -1.1038961      | -1.4202899      | 1.82978723      |
| P13646     | -3              | -13.75          | -6.25           | -2.1136364      | -1.8095238      | -1.0952381      | 3.22222222      | -1.5714286      | -2.5            | 3.33333333      |
| P13647     | -1.3513514      | -7.5581395      | -2.28           | -1.0844156      | 1.1091954       | -1.1            | 1.79            | -1.1052632      | -1.0862069      | 2.08695652      |
| P13667     | 1.1             | 1.75            | T ONLY          | T ONLY          | 2               | T ONLY          | T ONLY          | 1.25            | T ONLY          | N ONLY          |
| P13671     | ABSENT          | ABSENT          | ABSENT          | ABSENT          | T ONLY          | ABSENT          | ABSENT          | ABSENT          | T ONLY          | ABSENT          |
| P13693     | -1.5            | N ONLY          | ABSENT          | 1               | T ONLY          | N ONLY          | N ONLY          | T ONLY          | N ONLY          | N ONLY          |
| P13716     | N Only          | N ONLY          | T ONLY          | ABSENT          | -3              | T ONLY          | 3               | 1.33333333      | -1.5            | T ONLY          |
| P13746     | T ONLY          | -2              | ABSENT          | T ONLY          | T ONLY          | ABSENT          | T ONLY          | T ONLY          | T ONLY          | N ONLY          |
| P13760     | ABSENT          | ABSENT          | ABSENT          | ABSENT          | T ONLY          | ABSENT          | ABSENT          | ABSENT          | T ONLY          | ABSENT          |
| P13761     | ABSENT          | ABSENT          | ABSENT          | ABSENT          | T ONLY          | ABSENT          | ABSENT          | ABSENT          | T ONLY          | ABSENT          |
| P13796     | ABSENT          | 1               | ABSENT          | T ONLY          | 1               | ABSENT          | T ONLY          | T ONLY          | ABSENT          | ABSENT          |
| P13797     | ABSENT          | T ONLY          | T ONLY          | ABSENT          | N ONLY          | ABSENT          | T ONLY          | N ONLY          | ABSENT          | ABSENT          |
| P13798     | T ONLY          | N ONLY          | 2.00            | 2               | -2              | 3               | 8               | T ONLY          | -1.125          | N ONLY          |
| P13804     | -1.2            | -1.6666667      | N ONLY          | 2.5             | -1.3333333      | -5              | -1.25           | 2               | -2              | N ONLY          |
| P13861     | N Only          | T ONLY          | N ONLY          | N ONLY          | ABSENT          | 3               | ABSENT          | T ONLY          | -6              | -2              |
| P14136     | 1.09072848      | -1.1013677      | 34.58           | 8.0326087       | 1.81780962      | 9.7715736       | 12.0077519      | 2.0931677       | 14.5135135      | 3.57065217      |
| P14314     | 1.25            | 1.6666667       | -1.50           | 6.6666667       | 7               | 3.6666667       | 3               | 3.6666667       | 4.6666667       | 1               |
| P14317     | ABSENT          |
| P14324     | 2               | 2               | ABSENT          | ABSENT          | -2              | 1.5             | T ONLY          | N ONLY          | -3              | 2               |
| P14415     | -2              | T ONLY          | -3.00           | N ONLY          | ABSENT          | N ONLY          | -1.3333333      | -2              | N ONLY          | N ONLY          |
| P14543     | ABSENT          | ABSENT          | ABSENT          | T ONLY          | T ONLY          | ABSENT          | ABSENT          | T ONLY          | ABSENT          | ABSENT          |
| P14550     | -2              | 4               | 2.00            | ABSENT          | N ONLY          | T ONLY          | 5               | N ONLY          | -2              | T ONLY          |
| P14618     | -2.2            | -3.0769231      | 1.53            | 1.96969697      | -1.1944444      | -1.2162162      | 2.20930233      | 2.03125         | 1.09570957      | -1.5            |
| P14621     | -1.75           | N ONLY          | 2.60            | 1.33333333      | -2              | 1               | -1.2            | 1.33333333      | -1.1666667      | -1.2            |
| P14625     | -1.125          | 2.13333333      | 1.38            | 8               | 2.45454545      | 2.25            | 2.63636364      | 2.63636364      | 1.27536232      | -1.75           |
| P14649     | 4.5             | -1.5            | 1.00            | 4               | 4               | 1.25            | 1.33333333      | 5               | -1.2            | 1               |
| P14678     | T ONLY          | T ONLY          | N ONLY          | T ONLY          | ABSENT          | ABSENT          | ABSENT          | ABSENT          | ABSENT          | ABSENT          |
| P14854     | 1               | N ONLY          | -3.00           | N ONLY          | T ONLY          | N ONLY          | ABSENT          | ABSENT          | N ONLY          | -2.5            |
| P14866     | N Only          | T ONLY          | ABSENT          | T ONLY          | ABSENT          | 1               | T ONLY          | 2.5             | ABSENT          | ABSENT          |
| P14868     | -1.75           | 4               | T ONLY          | 2.5             | 1.33333333      | 2               |

| Protein ID | FC<br>104T/104N | FC<br>105T/105N | FC<br>106T/106N | FC<br>111T/111N | FC<br>112T/112N | FC<br>121T/121N | FC<br>347T/347N | FC<br>353T/353N | FC<br>563T/563N | FC<br>537T/537N |
|------------|-----------------|-----------------|-----------------|-----------------|-----------------|-----------------|-----------------|-----------------|-----------------|-----------------|
| P14920     | ABSENT          | T ONLY          | ABSENT          |
| P14923     | ABSENT          | N ONLY          | N ONLY          | 1               | N ONLY          | 1               | ABSENT          | T ONLY          | ABSENT          | 2               |
| P14927     | -3              | N ONLY          | N ONLY          | N ONLY          | ABSENT          | N ONLY          | N ONLY          | ABSENT          | -9              | -6.5            |
| P15090     | 1.33333333      | -4              | T ONLY          | 9               | 1.33333333      | T ONLY          | 2               | 1               | 2               | 2               |
| P15104     | N Only          | 1               | N ONLY          | -4              | T ONLY          | N ONLY          | N ONLY          | -2              | N ONLY          | N ONLY          |
| P15121     | -1.6666667      | -2.25           | 2.00            | 1.25            | 2               | 1.5             | 3               | 3.5             | -1.3125         | 2               |
| P15144     | ABSENT          |
| P15170     | ABSENT          | ABSENT          | ABSENT          | T ONLY          | ABSENT          | ABSENT          | ABSENT          | ABSENT          | N ONLY          | N ONLY          |
| P15259     | 1               | -1.8571429      | 2.14            | 1.2             | 3.33333333      | -2.25           | -1.2222222      | 1.8             | 2.66666667      | -4.5            |
| P15311     | -1.75           | 1.48148148      | 9.29            | 8.6             | 1.90909091      | 10.1666667      | 8.2             | 3.53846154      | 5.52380952      | -1.875          |
| P15531     | -1.5454545      | -5.5            | -3.50           | 2.57142857      | 1.2             | 1.42857143      | -1.2857143      | 1.4             | -1.5714286      | -2              |
| P15559     | ABSENT          | N ONLY          | ABSENT          | T ONLY          | T ONLY          | ABSENT          | ABSENT          | T ONLY          | -1.5            | N ONLY          |
| P15880     | 1.25            | 3.5             | -3.00           | T ONLY          | T ONLY          | 2               | 2               | 1.5             | -3              | 4               |
| P15924     | ABSENT          | N ONLY          | N ONLY          | 4               | ABSENT          | T ONLY          | T ONLY          | T ONLY          | T ONLY          | ABSENT          |
| P15927     | 1               | ABSENT          | ABSENT          | ABSENT          | ABSENT          | T ONLY          | ABSENT          | ABSENT          | ABSENT          | ABSENT          |
| P16070     | 2               | -3              | T ONLY          | T ONLY          | 2               | T ONLY          | T ONLY          | -1.5            | T ONLY          | T ONLY          |
| P16083     | ABSENT          | -2              | T ONLY          | ABSENT          | ABSENT          | 2               | ABSENT          | ABSENT          | ABSENT          | ABSENT          |
| P16104     | -1.7435897      | 3.58064516      | 1.73            | 4.44            | 1.41935484      | 2.65217391      | 2.25            | 2.88            | 1.07936508      | 1.68421053      |
| P16144     | ABSENT          | T ONLY          | ABSENT          |
| P16152     | -2.75           | -1.4444444      | 2.43            | -1.25           | -1.4545455      | 1.125           | 2.42857143      | -7.6666667      | -1.75           | -3.25           |
| P16157     | ABSENT          | N ONLY          | N ONLY          | N ONLY          | ABSENT          | ABSENT          | ABSENT          | ABSENT          | ABSENT          | N ONLY          |
| P16298     | N Only          | -2              | N ONLY          | -4              | N ONLY          | -7.75           |
| P16401     | 1.41666667      | 17.3333333      | T ONLY          | T ONLY          | 8               | T ONLY          |
| P16402     | 1.39285714      | 7.06666667      | 3.50            | 2.66666667      | -1.4545455      | 3.90909091      | 6.2             | 2.31578947      | -1.1707317      | -1.6290323      |
| P16403     | 1.39285714      | 7.06666667      | 3.50            | 2.66666667      | -1.5454545      | 3.81818182      | 6.2             | 2.31578947      | -1.1707317      | -1.6290323      |
| P16435     | 1               | T ONLY          | N ONLY          | T ONLY          | ABSENT          | T ONLY          | 1               | T ONLY          | T ONLY          | ABSENT          |
| P16452     | ABSENT          |
| P16520     | -2              | -1.375          | -4.80           | -2.6666667      | -2.4            | -2.1666667      | -3.2857143      | 1               | -2.5            | -4.1666667      |
| P16615     | 1.5             | T ONLY          | N ONLY          | 1.25            | T ONLY          | -10             | -6              | T ONLY          | N ONLY          | -15             |
| P16671     | ABSENT          |
| P16930     | 2               | 1               | ABSENT          | T ONLY          | ABSENT          | ABSENT          | T ONLY          | T ONLY          | T ONLY          | ABSENT          |
| P16949     | -1.3333333      | -3.3333333      | -3.33           | 2.57142857      | 1.75            | -4.6            | -1.5            | -1.125          | N ONLY          | -1.6666667      |
| P17174     | -5.5            | -6.5            | -2.20           | -6.3333333      | -1.4444444      | -15             | -2.0909091      | -5.3333333      | -48             | -6.1666667      |
| P17252     | T ONLY          | -2              | -2.33           | 1               | N ONLY          | -2              | -1.75           | 1.5             | -13.5           | N ONLY          |
| P17301     | ABSENT          | N ONLY          | T ONLY          | ABSENT          |
| P17302     | ABSENT          | T ONLY          | ABSENT          |
| P17600     | N Only          | -14             | N ONLY          | N ONLY          | N ONLY          |
| P17612     | -2              | 2               | N ONLY          | 1               | T ONLY          | N ONLY          | 1               | 1               | N ONLY          | N ONLY          |
| P17655     | 1               | N ONLY          | T ONLY          | 2               | T ONLY          | ABSENT          | ABSENT          | T ONLY          | ABSENT          | ABSENT          |
| P17661     | 2               | 1.6             | 7.00            | T ONLY          | 11              | 22              | 9               | 14.5            | 8               | 5.66666667      |
| P17677     | N Only          |
| P17812     | T ONLY          | ABSENT          | ABSENT          | T ONLY          | ABSENT          | ABSENT          | T ONLY          | ABSENT          | ABSENT          | N ONLY          |
| P17813     | ABSENT          | N ONLY          | ABSENT          | T ONLY          | N ONLY          | T ONLY          | ABSENT          | N ONLY          | ABSENT          | ABSENT          |
| P17844     | -2              | T ONLY          | -1.50           | T ONLY          | N ONLY          | T ONLY          | 7               | 2.5             | T ONLY          | N ONLY          |
| P17858     | N Only          | -1.75           | -1.33           | 1               | -6              | 1               | 3               | 1.4             | 1.33333333      | -2.1666667      |
| P17931     | T ONLY          | -2              | 1.00            | T ONLY          | 1               | ABSENT          | ABSENT          | ABSENT          | T ONLY          | ABSENT          |
| P17980     | ABSENT          | T ONLY          | T ONLY          | T ONLY          | ABSENT          | ABSENT          | ABSENT          | ABSENT          | N ONLY          | ABSENT          |
| P17987     | -3              | 1.33333333      | 1.50            | 3               | 1               | -2              | 1.5             | -1.6666667      | -2              | 1               |
| P18085     | -1.0714286      | -5              | -3.57           | 1.1875          | -1.1428571      | -2.0833333      | -1.8888889      | -1.2            | -1.826087       | -1.6            |
| P18124     | -1.5            | 3               | 1.50            | T ONLY          | T ONLY          | 2               | T ONLY          | 2               | 1.33333333      | N ONLY          |
| P18206     | -1.2222222      | 2.4             | 18.00           | 23              | T ONLY          | T ONLY          | T ONLY          | T ONLY          | 12.6666667      | 6               |
| P18509     | ABSENT          |
| P18621     | 2               | T ONLY          | T ONLY          | T ONLY          | ABSENT          | N ONLY          | ABSENT          | ABSENT          | T ONLY          | N ONLY          |
| P18669     | -1.2857143      | -2              | 1.36            | -1.4285714      | 2.75            | -2.3333333      | -1.4444444      | 2.16666667      | 1.7254902       | -3.375          |
| P18754     | ABSENT          |
| P18887     | ABSENT          | T ONLY          | ABSENT          | ABSENT          |
| P19012     | -1.2727273      | -5.0625         | -2.26           | -1.4137931      | 1.17073171      | -1.212766       | 4.46153846      | -1.2666667      | -2.1666667      | 3.6             |
| P19013     | -3.4444444      | -2.05           | -1.29           | 1.19512195      | -1.0625         | -1.1034483      | 1.1             | -1.5            | 1.11904762      | 2.1             |
| P19022     | ABSENT          |
| P19086     | ABSENT          | -3              | N ONLY          | N ONLY          | ABSENT          | -10             | -2              | -1.5            | N ONLY          | N ONLY          |
| P19105     | 1.85714286      | N ONLY          | -1.40           | 2.6             | 8               | 1               | -3              | 6               | -4.5            | -3.5            |
| P19338     | -2.5714286      | 4.5             | N ONLY          | 17              | 2               | T ONLY          | 3.5             | T ONLY          | T ONLY          | 4               |

| Protein ID | FC<br>104T/104N | FC<br>105T/105N | FC<br>106T/106N | FC<br>111T/111N | FC<br>112T/112N | FC<br>121T/121N | FC<br>347T/347N | FC<br>353T/353N | FC<br>563T/563N | FC<br>537T/537N |
|------------|-----------------|-----------------|-----------------|-----------------|-----------------|-----------------|-----------------|-----------------|-----------------|-----------------|
| P19367     | -5.2857143      | -2.8181818      | -4.64           | -7.1666667      | 1               | -52             | -1.6829268      | -1.25           | -5.1818182      | -5.5            |
| P19404     | -2              | -3.5            | -2.00           | -2.3333333      | 2.5             | -11             | 1.14285714      | T ONLY          | -21             | -5              |
| P19623     | -1.3333333      | 1               | 1.00            | 1.5             | 2               | 1               | 4               | T ONLY          | ABSENT          | 2               |
| P19652     | 8               | ABSENT          | ABSENT          | T ONLY          | 1               |
| P19784     | T ONLY          | ABSENT          | N ONLY          | N ONLY          |
| P19823     | T ONLY          | ABSENT          | ABSENT          | T ONLY          | ABSENT          |
| P19827     | T ONLY          | ABSENT          | ABSENT          | T ONLY          | T ONLY          | T ONLY          | ABSENT          | T ONLY          | T ONLY          | ABSENT          |
| P19971     | T ONLY          | ABSENT          | T ONLY          | ABSENT          |
| P20020     | 1.66666667      | 2               | -9.00           | 1               | N ONLY          | -4              | -6.5            | 2               | -19.5           | N ONLY          |
| P20042     | N Only          | ABSENT          | N ONLY          | T ONLY          | ABSENT          | ABSENT          | ABSENT          | ABSENT          | ABSENT          | ABSENT          |
| P20073     | T ONLY          | T ONLY          | T ONLY          | 1.5             | T ONLY          | 1               | -1.5            | -1.3333333      | -3              | -1.5            |
| P20338     | N Only          | 1               | ABSENT          | 1               | ABSENT          | 2.5             | ABSENT          | -2              | -3              | -1.5            |
| P20339     | -3              | 1.5             | 2.00            | 2.5             | 2.25            | -1.2857143      | 2.66666667      | 1               | -2.5714286      | N ONLY          |
| P20340     | -1.7142857      | 1.09090909      | 3.25            | 1.22222222      | -1.125          | -1.4            | 1.875           | -1.25           | -8.625          | -3.25           |
| P20472     | ABSENT          |
| P20591     | ABSENT          | T ONLY          | ABSENT          |
| P20618     | N Only          | T ONLY          | ABSENT          | 4               | ABSENT          | -2              | N ONLY          | ABSENT          | 1.33333333      | -1.5            |
| P20648     | -2.1666667      | -3.6666667      | -1.08           | N ONLY          | -3              | -11             | -1.7142857      | -5.5            | -7.95           | -1.9615385      |
| P20671     | -1.4            | 3.90625         | 1.77            | 4.92            | 1.4516129       | 2.72            | 2.375           | 3.03703704      | -1.0263158      | 1.84615385      |
| P20674     | 1.5             | 1               | -2.67           | 1               | ABSENT          | -4.5            | 1.25            | 2               | -4.2            | -5.5            |
| P20700     | -1.8333333      | 3.14285714      | T ONLY          | T ONLY          | N ONLY          | T ONLY          | 8               | 4.5             | -1.5            | 2.66666667      |
| P20742     | 2.9375          | N ONLY          | N ONLY          | 3               | T ONLY          | T ONLY          | 11              | 13              | 14              | 2               |
| P20774     | ABSENT          | N ONLY          | ABSENT          | T ONLY          | T ONLY          | ABSENT          | ABSENT          | T ONLY          | ABSENT          | T ONLY          |
| P20908     | ABSENT          |
| P20916     | N Only          | N ONLY          | -1.75           | N ONLY          | -2.4            | N ONLY          | 2.75            | N ONLY          | -11.25          | -6              |
| P20936     | ABSENT          |
| P20962     | 3               | ABSENT          | N ONLY          | T ONLY          | T ONLY          | 1               | ABSENT          | T ONLY          | -1.8            | 4               |
| P21266     | N Only          | -1.5714286      | 3.00            | 1.75            | 2.33333333      | -1.75           | 2.33333333      | 1.5             | 1.2             | -2.125          |
| P21281     | -2              | -6              | -2.00           | -2              | 1               | -14             | -1.5            | N ONLY          | -21             | -4.75           |
| P21283     | ABSENT          | N ONLY          | N ONLY          | N ONLY          | -2              | N ONLY          | T ONLY          | N ONLY          | N ONLY          | N ONLY          |
| P21291     | 1.5             | N ONLY          | -1.38           | -4              | -3              | -3              | 1.5             | 2               | -2.25           | 3.2             |
| P21333     | 9               | -2.8333333      | T ONLY          | 75              | T ONLY          | T ONLY          | T ONLY          | 13              | T ONLY          | 12.8571429      |
| P21397     | -5              | 1.16666667      | 3.00            | 1.5             | 1.5             | 1.75            | 2.66666667      | 2.5             | 2.66666667      | -1.5            |
| P21399     | 2               | 2               | T ONLY          | 1               | T ONLY          | 3               |
| P21579     | N Only          | N ONLY          | -54.00          | N ONLY          | ABSENT          | N ONLY          | -18             | ABSENT          | N ONLY          | N ONLY          |
| P21695     | -2              | N ONLY          | T ONLY          | -2              | 3               | T ONLY          | T ONLY          | N ONLY          | T ONLY          | T ONLY          |
| P21796     | -3.3333333      | -3.5            | -5.40           | -1.0833333      | 1               | -2.9090909      | -1.3333333      | 1.33333333      | -5.1666667      | -3.7            |
| P21810     | ABSENT          | N ONLY          | ABSENT          | T ONLY          | T ONLY          | ABSENT          | T ONLY          | ABSENT          | ABSENT          | 4               |
| P21912     | N Only          | -3              | N ONLY          | -3              | 1               | 1               | N ONLY          | T ONLY          | N ONLY          | -5              |
| P21926     | N Only          | -11             | N ONLY          | -7.25           | -5.1666667      | N ONLY          | -5              | N ONLY          | -1.9615385      | -1.75           |
| P21964     | ABSENT          | T ONLY          | T ONLY          | ABSENT          | ABSENT          | T ONLY          | ABSENT          | 1.33333333      | 2.66666667      | ABSENT          |
| P21980     | ABSENT          | ABSENT          | ABSENT          | T ONLY          | T ONLY          | ABSENT          | ABSENT          | ABSENT          | ABSENT          | T ONLY          |
| P22033     | N Only          | 1               | 1.00            | T ONLY          | ABSENT          | N ONLY          | 3               | ABSENT          | ABSENT          | ABSENT          |
| P22059     | ABSENT          | ABSENT          | ABSENT          | ABSENT          | ABSENT          | ABSENT          | 1               | N ONLY          | ABSENT          | ABSENT          |
| P22061     | -6              | 1               | 1.00            | -1.1818182      | -1.5            | -1.6666667      | 1.16666667      | 1               | -2.8636364      | 1.06666667      |
| P22090     | N Only          | 1.33333333      | N ONLY          | T ONLY          | ABSENT          | T ONLY          | T ONLY          | T ONLY          | -4.5            | T ONLY          |
| P22102     | 3               | T ONLY          | ABSENT          | T ONLY          | ABSENT          | ABSENT          | ABSENT          | 1               | T ONLY          | ABSENT          |
| P22105     | ABSENT          | N ONLY          | N ONLY          |
| P22234     | ABSENT          | ABSENT          | ABSENT          | T ONLY          | ABSENT          | ABSENT          | T ONLY          | T ONLY          | ABSENT          | ABSENT          |
| P22307     | 1.5             | -2              | T ONLY          | T ONLY          | T ONLY          | 3               | ABSENT          | T ONLY          | T ONLY          | 3               |
| P22314     | -1.6666667      | 1.88888889      | 1.40            | 2               | 1.33333333      | 1.41666667      | 2.4             | 1.28571429      | -4.5            | -10             |
| P22352     | T ONLY          | ABSENT          | ABSENT          | T ONLY          | T ONLY          | ABSENT          | ABSENT          | ABSENT          | ABSENT          | ABSENT          |
| P22392     | -1.4            | -5              | 1.00            | 5.5             | 2.5             | -1.25           | 1               | 1.25            | -1.9090909      | N ONLY          |
| P22492     | 2.44444444      | 5               | 2.20            | 2.9             | -4              | 6.33333333      | 5.66666667      | 1.75            | -1.5            | -1.2631579      |
| P22626     | -1.16           | 5               | -1.17           | 7.28571429      | 2.85714286      | 2.5             | 2.16666667      | 1.61111111      | -2.5            | -1.4            |
| P22676     | -1.75           | N ONLY          | 1.67            | T ONLY          | T ONLY          | 1               | 4.75            | N ONLY          | -1.5            | -2.5            |
| P22694     | -1.5            | 2               | -3.00           | 1               | N ONLY          | N ONLY          | -2              | -2              | N ONLY          | N ONLY          |
| P22695     | 1.16666667      | -1.3333333      | N ONLY          | -2.3333333      | 2               | -5.5            | 3               | 3               | -12             | -2.5            |
| P22748     | ABSENT          | ABSENT          | N ONLY          | ABSENT          | ABSENT          | N ONLY          | N ONLY          | ABSENT          | ABSENT          | N ONLY          |
| P23142     | N Only          | ABSENT          | ABSENT          | ABSENT          | T ONLY          | ABSENT          | ABSENT          | ABSENT          | ABSENT          | ABSENT          |
| P23193     | ABSENT          |
| P23229     | ABSENT          | ABSENT          | ABSENT          | ABSENT          | ABSENT          | T ONLY          | ABSENT          | ABSENT          | ABSENT          | ABSENT          |

| Protein ID | FC<br>104T/104N | FC<br>105T/105N | FC<br>106T/106N | FC<br>111T/111N | FC<br>112T/112N | FC<br>121T/121N | FC<br>347T/347N | FC<br>353T/353N | FC<br>563T/563N | FC<br>537T/537N |
|------------|-----------------|-----------------|-----------------|-----------------|-----------------|-----------------|-----------------|-----------------|-----------------|-----------------|
| P23246     | 1.33333333      | 3               | 1.00            | 4               | 4               | 2.33333333      | 2               | 3.33333333      | 1.44444444      | 1.11111111      |
| P23284     | 1.11764706      | N ONLY          | -1.38           | 13.3333333      | 8.5             | -1.1428571      | 1.57142857      | 4               | 1.77777778      | -2.1666667      |
| P23297     | N Only          | ABSENT          | N ONLY          | 1               | ABSENT          | N ONLY          | N ONLY          | ABSENT          | N ONLY          | T ONLY          |
| P23368     | N Only          | 3               | T ONLY          | T ONLY          | ABSENT          | 1               | T ONLY          | 2               | -3              | T ONLY          |
| P23378     | ABSENT          |
| P23381     | T ONLY          | ABSENT          | ABSENT          | T ONLY          | ABSENT          | ABSENT          | ABSENT          | T ONLY          | T ONLY          | ABSENT          |
| P23396     | 1               | 2.4             | 1.50            | 10              | 4               | 4               | 5               | 1.33333333      | 1.33333333      | 2.33333333      |
| P23471     | -3.2857143      | -1.33333333     | -4.14           | 2               | N ONLY          | -2.7142857      | -1.1            | 1.16666667      | -4.1590909      | -1.2647059      |
| P23515     | N Only          | N ONLY          | -3.50           | N ONLY          | N ONLY          | N ONLY          | 3               | N ONLY          | -3              | N ONLY          |
| P23526     | -2              | 1.66666667      | -1.25           | 2.4             | 1.5             | -1.5            | 10              | 2               | -2.5            | 1.42857143      |
| P23528     | 1.30769231      | -1.3529412      | -1.07           | 1.65217391      | 1.41666667      | 1.12            | 1.19047619      | 1.30769231      | -3.1875         | -4.125          |
| P23634     | 2.5             | 2               | -4.33           | 1.33333333      | N ONLY          | -2.6666667      | -5              | 4.5             | -12             | N ONLY          |
| P23786     | ABSENT          | 5               | ABSENT          | ABSENT          | ABSENT          | ABSENT          | T ONLY          | ABSENT          | ABSENT          | ABSENT          |
| P23919     | N Only          | T ONLY          | ABSENT          | T ONLY          | ABSENT          | ABSENT          | ABSENT          | T ONLY          | T ONLY          | ABSENT          |
| P23921     | ABSENT          | ABSENT          | ABSENT          | T ONLY          | ABSENT          | ABSENT          | ABSENT          | ABSENT          | ABSENT          | ABSENT          |
| P24043     | ABSENT          | T ONLY          | ABSENT          | T ONLY          | T ONLY          | T ONLY          | ABSENT          | T ONLY          | T ONLY          | ABSENT          |
| P24539     | -2              | -1.7777778      | -4.50           | -1.4444444      | 1.66666667      | -1.7777778      | -2              | 1               | -3.75           | -10.5           |
| P24666     | 1.25            | -3              | -1.50           | 6               | 2               | -1.5            | 2               | -2              | 1               | N ONLY          |
| P24752     | 1               | 2.66666667      | N ONLY          | -1.5            | -4              | 1               | 1.66666667      | -1.3333333      | -3.375          | N ONLY          |
| P24821     | 2.66666667      | 9               | 13.00           | 10.3333333      | 1.23076923      | T ONLY          | T ONLY          | 1.76923077      | 69.3333333      | T ONLY          |
| P24844     | 1               | N ONLY          | -4.00           | 7               | T ONLY          | 1.33333333      | N ONLY          | T ONLY          | ABSENT          | 3               |
| P25189     | T ONLY          | N ONLY          | ABSENT          | T ONLY          | N ONLY          | ABSENT          | ABSENT          | ABSENT          | ABSENT          | ABSENT          |
| P25205     | ABSENT          | ABSENT          | ABSENT          | T ONLY          | ABSENT          | ABSENT          | ABSENT          | ABSENT          | ABSENT          | ABSENT          |
| P25311     | T ONLY          | ABSENT          | ABSENT          | ABSENT          | T ONLY          | T ONLY          | ABSENT          | T ONLY          | ABSENT          | ABSENT          |
| P25325     | T ONLY          | T ONLY          | T ONLY          | ABSENT          | ABSENT          | T ONLY          | ABSENT          | 1.5             | N ONLY          | ABSENT          |
| P25685     | N Only          | T ONLY          | ABSENT          | ABSENT          | T ONLY          | T ONLY          | ABSENT          | ABSENT          | ABSENT          | ABSENT          |
| P25686     | ABSENT          | ABSENT          | N ONLY          | ABSENT          | ABSENT          | N ONLY          | N ONLY          | -3              | N ONLY          | N ONLY          |
| P25705     | -3.6363636      | -1.28           | -4.25           | 1.05            | 1.45454545      | -4.5            | 1.65            | -1.0714286      | -6.5454545      | -2.0166667      |
| P25786     | -1.5            | -1.6666667      | ABSENT          | 1               | 1               | 1               | 1               | -2              | -1.125          | 2               |
| P25787     | N Only          | ABSENT          | T ONLY          | T ONLY          | ABSENT          | T ONLY          | ABSENT          | ABSENT          | N ONLY          | ABSENT          |
| P25788     | 1               | 7               | -2.00           | 2.5             | 1               | -2              | T ONLY          | 1               | -2.5            | -1.5            |
| P25789     | 1               | -4              | 2.00            | 2               | 4               | 1               | T ONLY          | T ONLY          | -1.5            | N ONLY          |
| P26006     | ABSENT          | T ONLY          | ABSENT          |
| P26038     | -1.7407407      | 1.32432432      | 12.14           | 8.85714286      | 1.73333333      | 10.4285714      | 13.25           | 2.63636364      | 6.06666667      | -1.75           |
| P26196     | ABSENT          | T ONLY          | ABSENT          | T ONLY          | ABSENT          | T ONLY          | ABSENT          | ABSENT          | ABSENT          | T ONLY          |
| P26232     | -4              | 1               | 1.29            | -2              | N ONLY          | 1               | 1               | T ONLY          | -3              | -3.75           |
| P26358     | ABSENT          | ABSENT          | ABSENT          | T ONLY          | ABSENT          | ABSENT          | ABSENT          | ABSENT          | ABSENT          | ABSENT          |
| P26373     | -1.2            | 1               | -7.00           | T ONLY          | T ONLY          | 1.4             | 4               | 6               | -1.5            | 2               |
| P26440     | -2              | 3               | ABSENT          | T ONLY          | ABSENT          | 1               | T ONLY          | T ONLY          | N ONLY          | ABSENT          |
| P26447     | ABSENT          | ABSENT          | ABSENT          | ABSENT          | T ONLY          | ABSENT          | ABSENT          | T ONLY          | ABSENT          | ABSENT          |
| P26583     | 1.5             | T ONLY          | ABSENT          | T ONLY          | 2               |
| P26599     | -2              | 3               | ABSENT          | T ONLY          | ABSENT          | T ONLY          | ABSENT          | T ONLY          | ABSENT          | ABSENT          |
| P26639     | -2              | 2               | T ONLY          | 1.33333333      | ABSENT          |
| P26640     | 4               | 3               | T ONLY          | T ONLY          | T ONLY          | 3               | ABSENT          | T ONLY          | ABSENT          | N ONLY          |
| P26641     | 2               | 6               | -2.00           | 8               | 3               | 1.25            | 1               | 3               | -1.5            | -1.5            |
| P26885     | N Only          | -2              | T ONLY          | T ONLY          | 1               | N ONLY          | 2               | 1               | N ONLY          | N ONLY          |
| P27105     | ABSENT          | ABSENT          | N ONLY          | T ONLY          | T ONLY          | T ONLY          | ABSENT          | N ONLY          | T ONLY          | N ONLY          |
| P27144     | -2              | -2              | N ONLY          | T ONLY          | ABSENT          | N ONLY          | ABSENT          | ABSENT          | -1.5            | N ONLY          |
| P27338     | -1.25           | 1.1             | 7.00            | 5               | 2.66666667      | 2.5             | 3               | 4.5             | 2.66666667      | 1.06666667      |
| P27348     | -1.9565217      | -1.4            | 1.31            | 1.30612245      | 2.83333333      | -1.65           | 1.22222222      | T ONLY          | -2.625          | -3.1666667      |
| P27361     | -3              | 1.5             | 1.00            | 1.33333333      | -1.5            | -1.3333333      | 4.5             | 1.66666667      | 3.33333333      | N ONLY          |
| P27544     | N Only          | ABSENT          |
| P27635     | N Only          | 1.5             | T ONLY          | T ONLY          | T ONLY          | 2               | -2              | 1               | 1.33333333      | N ONLY          |
| P27694     | ABSENT          | T ONLY          | ABSENT          |
| P27695     | 1               | T ONLY          | ABSENT          | T ONLY          | T ONLY          | -2              | T ONLY          | ABSENT          | ABSENT          | N ONLY          |
| P27701     | ABSENT          | N ONLY          | ABSENT          | N ONLY          |
| P27708     | ABSENT          | ABSENT          | ABSENT          | ABSENT          | T ONLY          | ABSENT          | ABSENT          | ABSENT          | ABSENT          | ABSENT          |
| P27797     | -1.75           | -2.5            | ABSENT          | T ONLY          | T ONLY          | 1               | T ONLY          | ABSENT          | 1               | 2               |
| P27816     | ABSENT          | N ONLY          | T ONLY          | -1.3333333      | N ONLY          | T ONLY          | T ONLY          | -2              | 1.33333333      | -1.25           |
| P27824     | -1.6153846      | 1.16666667      | 1.14            | 2.71428571      | 2.75            | 4.25            | 2.75            | 4.66666667      | 4.88888889      | 1.16666667      |
| P28062     | 1               | 1               | ABSENT          | T ONLY          | T ONLY          | T ONLY          | T ONLY          | ABSENT          | T ONLY          | ABSENT          |
| P28065     | 1               | -2              | T ONLY          | 2               | T ONLY          | T ONLY          |

| Protein ID | FC 104T/104N | FC 105T/105N | FC 106T/106N | FC 111T/111N | FC 112T/112N | FC 121T/121N | FC 347T/347N | FC 353T/353N | FC 563T/563N | FC 537T/537N |
|------------|--------------|--------------|--------------|--------------|--------------|--------------|--------------|--------------|--------------|--------------|
| P28066     | -3           | 1.66666667   | N ONLY       | T ONLY       | T ONLY       | 1            | -2           | T ONLY       | 2.66666667   | -1.25        |
| P28072     | 1            | 2            | T ONLY       | 1.5          | 3            | 1            | 1.5          | -2           | -3           | 1.33333333   |
| P28074     | -3.33333333  | -1.16666667  | 1.00         | 5            | T ONLY       | -1.4         | 2.66666667   | 1.5          | -3.375       | -4.5         |
| P28161     | -1.33333333  | -1.1428571   | 8.00         | 2            | 3            | 1.25         | 4            | 2            | 1.6          | 1.2          |
| P28331     | -5           | -3.5         | -12.00       | -7           | 1            | N ONLY       | 1.625        | 1            | -28.5        | -6.5         |
| P28370     | ABSENT       | N ONLY       | ABSENT       | T ONLY       | ABSENT       | ABSENT       | ABSENT       | ABSENT       | ABSENT       | ABSENT       |
| P28482     | -1.8         | 1.91666667   | -1.33        | 2            | -5           | 1.33333333   | 4.75         | 1.28571429   | 1.14285714   | -1.625       |
| P28838     | -1.16666667  | 1.33333333   | T ONLY       | 13           | 8            | T ONLY       | T ONLY       | 1            | 6.33333333   | 2.66666667   |
| P28907     | -3           | 1            | ABSENT       | ABSENT       | ABSENT       | T ONLY       | ABSENT       | N ONLY       | T ONLY       | ABSENT       |
| P29144     | N Only       | ABSENT       | ABSENT       | T ONLY       | N ONLY       | T ONLY       | ABSENT       | T ONLY       | T ONLY       | ABSENT       |
| P29218     | -1.66666667  | -1.2         | 1.33         | -1.5         | 1.5          | 5            | 10           | 1            | -2           | -1.16666667  |
| P29401     | N Only       | -1.6         | 4.00         | 2            | -2           | N ONLY       | 3            | -3.33333333  | -1.3125      | 1            |
| P29508     | ABSENT       | ABSENT       | ABSENT       | N ONLY       | ABSENT       | ABSENT       | ABSENT       | ABSENT       | ABSENT       | ABSENT       |
| P29692     | 1.33333333   | 2.33333333   | N ONLY       | 14           | 2            | 1.5          | T ONLY       | T ONLY       | -3           | ABSENT       |
| P29762     | 2.2          | 1            | ABSENT       | T ONLY       | T ONLY       | 2            | T ONLY       | ABSENT       | ABSENT       | 2            |
| P29966     | -4.33333333  | -3           | T ONLY       | 5            | 2            | 5            | T ONLY       | 1            | T ONLY       | N ONLY       |
| P29992     | N Only       | 1            | N ONLY       | 1.5          | -2           | -4           | 3            | -2           | -3           | -2           |
| P30038     | 1            | 2.5          | -2.00        | 3            | 1            | -4           | 1            | 2.33333333   | -6           | 1.33333333   |
| P30040     | 2            | -1.5         | 1.00         | 2.5          | T ONLY       | 1.5          | 1            | T ONLY       | -3           | -2           |
| P30041     | -1.11111111  | -1.9090909   | 4.94         | 1.05263158   | -1.3846154   | 1.8125       | 1.70588235   | 1            | -1.5         | -1.8888889   |
| P30042     | N Only       | 1.16666667   | -1.50        | 1            | 1            | -2.5         | -1.2         | 2            | -2.75        | N ONLY       |
| P30043     | 1.5          | -3.66666667  | T ONLY       | 1.33333333   | T ONLY       | -1.25        | 3.5          | 1.33333333   | -1.16666667  | 1.5          |
| P30044     | -2.2857143   | -8.5         | -1.07        | 1.2          | 2.25         | -2.66666667  | 1.11111111   | 1.8          | -3.15        | -1.5625      |
| P30046     | -1.33333333  | N ONLY       | N ONLY       | T ONLY       | 3            | ABSENT       | N ONLY       | ABSENT       | 2            | N ONLY       |
| P30048     | -1.66666667  | -2.4444444   | 1.40         | -1.1         | 1            | -3.33333333  | -1.08333333  | T ONLY       | -3           | -5.25        |
| P30049     | -3           | -1.2         | -6.50        | 4            | 2            | -3.33333333  | -1.33333333  | 2.5          | -3.375       | -3.33333333  |
| P30084     | -2           | -2           | -2.67        | -7           | T ONLY       | N ONLY       | -3           | 1.33333333   | -4.8         | -2.16666667  |
| P30085     | -2           | -4           | -2.00        | 1            | 2.5          | 1            | 4            | 1            | T ONLY       | 2            |
| P30086     | -9           | -4           | -1.21        | -1.1         | -1.5714286   | -6           | 1            | -1.4285714   | 1.11111111   | -2.33333333  |
| P30101     | -1.2222222   | 2.11111111   | 2.33         | 5.5          | 5            | 1.8          | 2.6          | 2.75         | -1.03125     | 1.66666667   |
| P30153     | -2.5         | 1.2          | -1.50        | 3.66666667   | T ONLY       | -1.875       | -1.8         | -1.4285714   | -4.875       | -4.33333333  |
| P30273     | T ONLY       | ABSENT       | ABSENT       | ABSENT       | T ONLY       | T ONLY       | ABSENT       | T ONLY       | T ONLY       | T ONLY       |
| P30520     | T ONLY       | T ONLY       | N ONLY       | N ONLY       | ABSENT       | T ONLY       | ABSENT       | N ONLY       | ABSENT       | ABSENT       |
| P30622     | ABSENT       | ABSENT       | ABSENT       | N ONLY       | ABSENT       | T ONLY       | ABSENT       | ABSENT       | ABSENT       | ABSENT       |
| P30626     | -3.33333333  | -4.5         | -1.36        | 1            | -6           | 2            | 4            | 1            | 1.16666667   | -1.16666667  |
| P30711     | N Only       | ABSENT       | T ONLY       | ABSENT       |
| P30740     | ABSENT       | ABSENT       | ABSENT       | T ONLY       | T ONLY       | T ONLY       | T ONLY       | -2           | N ONLY       | ABSENT       |
| P30837     | ABSENT       | T ONLY       | ABSENT       |
| P31025     | ABSENT       | T ONLY       | ABSENT       | ABSENT       |
| P31040     | N Only       | 2            | -2.00        | 1            | N ONLY       | N ONLY       | -10          | N ONLY       | N ONLY       | -3.75        |
| P31146     | ABSENT       | T ONLY       | N ONLY       | N ONLY       | 1            | -8           | N ONLY       | -4           | -25.5        | N ONLY       |
| P31150     | -1.8823529   | -2           | -1.88        | -1.1111111   | -1.33333333  | -1.9047619   | 1.03125      | 1.06666667   | -4.1538462   | -1.7777778   |
| P31151     | ABSENT       | ABSENT       | ABSENT       | N ONLY       | ABSENT       | ABSENT       | ABSENT       | ABSENT       | ABSENT       | ABSENT       |
| P31153     | ABSENT       | T ONLY       | N ONLY       | 2            | ABSENT       | T ONLY       | T ONLY       | N ONLY       | -1.5         | ABSENT       |
| P31689     | T ONLY       | T ONLY       | -2.00        | 3            | T ONLY       | 1            | T ONLY       | T ONLY       | -4.5         | N ONLY       |
| P31930     | -2           | -2           | N ONLY       | -6           | 2            | -4           | -1.66666667  | T ONLY       | N ONLY       | -1.83333333  |
| P31937     | N Only       | 1            | N ONLY       | T ONLY       | T ONLY       | N ONLY       | T ONLY       | 2            | ABSENT       | 1            |
| P31939     | N Only       | 2            | ABSENT       | T ONLY       | ABSENT       | ABSENT       | N ONLY       | T ONLY       | ABSENT       | 2            |
| P31942     | 1.33333333   | T ONLY       | T ONLY       | 8            | T ONLY       | 1.25         | T ONLY       | 4            | N ONLY       | 4            |
| P31943     | 2            | 1            | ABSENT       | 7            | T ONLY       | 3            | T ONLY       | T ONLY       | -3           | N ONLY       |
| P31944     | ABSENT       | ABSENT       | N ONLY       | ABSENT       | ABSENT       | T ONLY       | ABSENT       | ABSENT       | ABSENT       | ABSENT       |
| P31946     | -2.0357143   | -1.5         | 1.00         | 1.14516129   | 2.54166667   | -1.6551724   | 1.27906977   | 2            | -2.5714286   | -4.5714286   |
| P31947     | -2           | -1.3529412   | 1.35         | 1.28571429   | 2.88235294   | -1.7368421   | 1.2          | T ONLY       | -2.0625      | -4.9         |
| P31948     | -3           | 1            | -1.33        | 1.75         | -2           | -1.25        | 3            | -2           | -4.125       | -1.75        |
| P31949     | 1            | -2           | ABSENT       | 3            | T ONLY       | T ONLY       | T ONLY       | 1            | 2.44444444   | T ONLY       |
| P32004     | N Only       | N ONLY       | N ONLY       | N ONLY       | ABSENT       | N ONLY       | N ONLY       | ABSENT       | N ONLY       | N ONLY       |
| P32119     | -2.86666667  | -1.2941176   | 1.72         | 2.6          | 2.75         | -1.5862069   | 1.95833333   | 1.14814815   | -1.4615385   | 1.14285714   |
| P32322     | ABSENT       | T ONLY       | ABSENT       | T ONLY       | ABSENT       | ABSENT       | ABSENT       | ABSENT       | ABSENT       | ABSENT       |
| P32455     | ABSENT       | ABSENT       | T ONLY       | ABSENT       | ABSENT       | ABSENT       | ABSENT       | ABSENT       | T ONLY       | ABSENT       |
| P32969     | 1            | T ONLY       | N ONLY       | T ONLY       | 3            | 2            | 3            | T ONLY       | T ONLY       | -1.5         |
| P33176     | -1.5         | 1            | 1.25         | 1.25         | 1.25         | -1.66666667  | 1.75         | -1.1428571   | 1.2          | N ONLY       |
| P33316     | 1            | T ONLY       | ABSENT       | T ONLY       | ABSENT       | ABSENT       | N ONLY       | ABSENT       | N ONLY       | N ONLY       |

| Protein ID | FC 104T/104N | FC 105T/105N | FC 106T/106N | FC 111T/111N | FC 112T/112N | FC 121T/121N | FC 347T/347N | FC 353T/353N | FC 563T/563N | FC 537T/537N |
|------------|--------------|--------------|--------------|--------------|--------------|--------------|--------------|--------------|--------------|--------------|
| P33991     | ABSENT       | T ONLY       | ABSENT       | T ONLY       | ABSENT       | ABSENT       | ABSENT       | ABSENT       | ABSENT       | ABSENT       |
| P33992     | T ONLY       | ABSENT       |
| P33993     | ABSENT       | ABSENT       | ABSENT       | T ONLY       | ABSENT       | ABSENT       | ABSENT       | ABSENT       | ABSENT       | ABSENT       |
| P34897     | ABSENT       | T ONLY       | ABSENT       | T ONLY       | ABSENT       | ABSENT       | T ONLY       | T ONLY       | ABSENT       | ABSENT       |
| P34931     | -1.6         | 1.25925926   | 1.54         | 2            | -1.0952381   | 1.52941176   | 2.28571429   | 1.31578947   | -1.8088235   | -7.75        |
| P34932     | -2.8333333   | 1.125        | 1.00         | -1.5         | 1.25         | 1.28571429   | 2.25         | 2            | -3.25        | N ONLY       |
| P35052     | T ONLY       | ABSENT       | ABSENT       | T ONLY       | ABSENT       | ABSENT       | ABSENT       | T ONLY       | T ONLY       | ABSENT       |
| P35080     | 1            | 2.2          | -1.14        | 2.25         | -1.5         | 1.4          | -5           | 3            | -1.5         | -1.2857143   |
| P35219     | ABSENT       |
| P35221     | 1.5          | 1            | -2.00        | 1            | N ONLY       | T ONLY       | T ONLY       | ABSENT       | N ONLY       | -1.5         |
| P35222     | -2           | 1            | 3.80         | T ONLY       | -2           | 1.6          | 2            | 6.5          | -1.65        | -3.5         |
| P35232     | 1            | 1.625        | -1.14        | 2.6          | 1.75         | -1.7142857   | 2.2          | 1.5          | -3.9375      | -8.5         |
| P35237     | -4           | -1.5         | T ONLY       | -3           | N ONLY       | T ONLY       | T ONLY       | 1.33333333   | T ONLY       | T ONLY       |
| P35241     | -1.9166667   | 1.37931034   | 11.50        | 5.1          | 1.69230769   | 10.3333333   | 6.42857143   | 1.92         | 6            | -1.8333333   |
| P35268     | -1.25        | -2           | 1.33         | 3            | 5            | 2.5          | T ONLY       | T ONLY       | 1            | N ONLY       |
| P35498     | ABSENT       | N ONLY       | ABSENT       |
| P35520     | ABSENT       | 4            | ABSENT       | T ONLY       | T ONLY       | ABSENT       | ABSENT       | 5            | T ONLY       | ABSENT       |
| P35527     | -1.3360656   | -2.2727273   | -1.52        | 1.42995169   | -1.0175439   | 1.10040161   | 1.41964286   | -1.1627907   | -1.233871    | -1.2         |
| P35542     | T ONLY       | ABSENT       | ABSENT       | T ONLY       | T ONLY       | T ONLY       | ABSENT       | T ONLY       | T ONLY       | ABSENT       |
| P35555     | ABSENT       | T ONLY       | ABSENT       |
| P35573     | 1            | ABSENT       | ABSENT       | ABSENT       | ABSENT       | T ONLY       | ABSENT       | T ONLY       | ABSENT       | N ONLY       |
| P35579     | 3.06666667   | -3.6666667   | -1.75        | 5.33333333   | 3.77777778   | 5.5          | 2.4          | 2.22222222   | 2.20512821   | 1.05263158   |
| P35580     | 3.5          | -5           | -2.67        | 2.5          | 1.83333333   | -1.2666667   | 1.3          | 1            | -1.3846154   | 1            |
| P35606     | T ONLY       | ABSENT       | ABSENT       | T ONLY       | T ONLY       | ABSENT       | ABSENT       | T ONLY       | ABSENT       | ABSENT       |
| P35609     | 1.5          | N ONLY       | N ONLY       | N ONLY       | 2            | N ONLY       | -2           | ABSENT       | -4.5         | N ONLY       |
| P35611     | -3.5         | -1.4444444   | 1.33         | 1.2          | -14          | -2.3333333   | -2.1428571   | 2            | -3.1875      | -5.25        |
| P35612     | N Only       | -4           | -11.00       | N ONLY       | -2.5         | -15          | -1.1111111   | -4           | -12.75       | -21          |
| P35613     | T ONLY       | 4            | N ONLY       | -3           | ABSENT       | -2.6666667   | 1            | 5            | -3           | -1.5         |
| P35637     | T ONLY       | T ONLY       | ABSENT       | N ONLY       |
| P35659     | ABSENT       | ABSENT       | ABSENT       | T ONLY       | ABSENT       | ABSENT       | ABSENT       | T ONLY       | ABSENT       | ABSENT       |
| P35749     | 7            | -5           | -1.67        | 3.5          | 3.4          | 3.5          | 3.5          | 1.2          | 1            | 3.07692308   |
| P35754     | N Only       | N ONLY       | -3.00        | T ONLY       | ABSENT       | ABSENT       | ABSENT       | T ONLY       | T ONLY       | 1            |
| P35900     | 1.5          | -10          | -2.33        | -2.4         | -4           | N ONLY       | T ONLY       | -1.5         | -1.5         | 1            |
| P35908     | -1.1413613   | -4.1891892   | -1.81        | 1.69494585   | 1.09642857   | 1.03551402   | 1.30327869   | 1.03225806   | -1.6052632   | 1.9826087    |
| P35998     | 1            | T ONLY       | ABSENT       | T ONLY       | ABSENT       | 4            | ABSENT       | 4            | N ONLY       | ABSENT       |
| P36222     | ABSENT       | ABSENT       | ABSENT       | ABSENT       | T ONLY       | ABSENT       | ABSENT       | ABSENT       | T ONLY       | ABSENT       |
| P36269     | ABSENT       |
| P36404     | 1            | N ONLY       | N ONLY       | T ONLY       | ABSENT       | 1            | N ONLY       | ABSENT       | -4.5         | N ONLY       |
| P36405     | 1            | -1.6666667   | 1.25         | -1.2         | 3            | -1.3333333   | 2            | T ONLY       | 1.11111111   | -1.25        |
| P36507     | N Only       | N ONLY       | N ONLY       | -3           | ABSENT       | N ONLY       | 1            | N ONLY       | -4.5         | N ONLY       |
| P36542     | -2           | -2           | -2.29        | -1.1428571   | 1.25         | N ONLY       | -1.625       | 4            | -10.2        | -1.35        |
| P36543     | -1.3333333   | -2.5         | -2.33        | -12          | 1.25         | -3.3333333   | -6.5         | -3           | -13.5        | -2.4         |
| P36578     | 2            | T ONLY       | N ONLY       | T ONLY       | T ONLY       | 1.25         | T ONLY       | T ONLY       | 1.33333333   | N ONLY       |
| P36776     | -1.5         | 3            | T ONLY       | T ONLY       | ABSENT       | 3            | 1.66666667   | 1            | N ONLY       | -1.5         |
| P36871     | N Only       | 1.125        | 3.00         | 1.5          | T ONLY       | 1.66666667   | 5            | 3            | -2.625       | 4            |
| P36873     | -2           | N ONLY       | ABSENT       | T ONLY       | N ONLY       | N ONLY       | 1.5          | T ONLY       | N ONLY       | N ONLY       |
| P36955     | ABSENT       | ABSENT       | ABSENT       | ABSENT       | T ONLY       | ABSENT       | ABSENT       | ABSENT       | ABSENT       | ABSENT       |
| P36957     | -2           | 1            | 1.50         | -3           | T ONLY       | -12          | 1.25         | -1.5         | -12          | -1.5         |
| P36959     | ABSENT       | ABSENT       | T ONLY       | ABSENT       | ABSENT       | ABSENT       | T ONLY       | ABSENT       | ABSENT       | ABSENT       |
| P36969     | -1.3333333   | N ONLY       | -2.00        | 1.5          | ABSENT       | -2           | -1.5         | N ONLY       | -4.5         | -1.5         |
| P37059     | ABSENT       |
| P37108     | 2.5          | -2           | ABSENT       | T ONLY       | N ONLY       | 2            |
| P37235     | -2.6666667   | N ONLY       | N ONLY       | 1.33333333   | -5           | N ONLY       | N ONLY       | -2           | -6.5         | -4.25        |
| P37802     | 2.0625       | -1.1176471   | 2.88         | 8.57142857   | 18           | 6.1          | 3.125        | 6.5          | 2.13333333   | 1.8          |
| P37837     | -7           | 2            | 3.67         | 1.55555556   | -1.9         | -2           | 4.25         | -2.125       | -7.5         | -3           |
| P37840     | N Only       | T ONLY       | N ONLY       | -4.5         | -2           | -15.5        | -7           | 2            | -40.5        | N ONLY       |
| P38117     | N Only       | 1            | -3.00        | 1.66666667   | T ONLY       | 1            | 2            | 1            | -4.5         | -4           |
| P38159     | 6            | 6            | ABSENT       | T ONLY       | 1            | T ONLY       | ABSENT       | 3            | ABSENT       | 4            |
| P38405     | ABSENT       | 1            | N ONLY       | -2.5         | 2            | N ONLY       | 1            | 1            | N ONLY       | N ONLY       |
| P38606     | N Only       | -6           | -3.50        | -2           | -3.3333333   | N ONLY       | 1.75         | -5           | -36          | -5.8333333   |
| P38646     | 1            | 1.23529412   | -2.33        | 1.75         | 1.33333333   | -1.3846154   | 2.09090909   | 1.2          | -4.5         | -4.6666667   |
| P38919     | 1            | T ONLY       | ABSENT       | T ONLY       | T ONLY       | T ONLY       | T ONLY       | 5            | N ONLY       | N ONLY       |





| Protein ID | FC<br>104T/104N | FC<br>105T/105N | FC<br>106T/106N | FC<br>111T/111N | FC<br>112T/112N | FC<br>121T/121N | FC<br>347T/347N | FC<br>353T/353N | FC<br>563T/563N | FC<br>537T/537N |
|------------|-----------------|-----------------|-----------------|-----------------|-----------------|-----------------|-----------------|-----------------|-----------------|-----------------|
| P46940     | 7               | T ONLY          | ABSENT          | T ONLY          | T ONLY          | T ONLY          |
| P46976     | -2              | T ONLY          | ABSENT          | T ONLY          | ABSENT          | T ONLY          | T ONLY          | ABSENT          | 6.66666667      | T ONLY          |
| P46977     | ABSENT          | ABSENT          | ABSENT          | T ONLY          | ABSENT          | T ONLY          | ABSENT          | ABSENT          | ABSENT          | ABSENT          |
| P47755     | -1.5            | 1               | -2.00           | 2               | 1.5             | -2              | 1.5             | 3               | -3.5            | N ONLY          |
| P47756     | 1.125           | -1.1666667      | 2.00            | -1.2857143      | 1.25            | 1               | -1.3333333      | 1.83333333      | -2.625          | -1.125          |
| P47870     | ABSENT          | ABSENT          | ABSENT          | N ONLY          | ABSENT          | ABSENT          | N ONLY          | ABSENT          | -3              | N ONLY          |
| P47897     | T ONLY          | ABSENT          | ABSENT          | ABSENT          | ABSENT          | 1               | ABSENT          | ABSENT          | ABSENT          | T ONLY          |
| P47929     | ABSENT          | ABSENT          | ABSENT          | -2              | ABSENT          | ABSENT          | ABSENT          | T ONLY          | ABSENT          | ABSENT          |
| P47985     | -3              | -3              | -1.50           | 2               | -2              | -2.5            | N ONLY          | T ONLY          | -6              | N ONLY          |
| P48047     | -4              | -1.6153846      | -3.25           | -1.1875         | 2.83333333      | -5.5            | 1.28571429      | 1.83333333      | -3.6666667      | -1.3636364      |
| P48147     | ABSENT          | ABSENT          | ABSENT          | ABSENT          | N ONLY          | N ONLY          | ABSENT          | ABSENT          | ABSENT          | N ONLY          |
| P48163     | ABSENT          | 1               | -2.00           | ABSENT          | ABSENT          | T ONLY          | T ONLY          | 2               | -1.5            | ABSENT          |
| P48444     | 3               | 2               | ABSENT          | T ONLY          | 1               | T ONLY          | 3               | 1.5             | T ONLY          | 1               |
| P48449     | ABSENT          | T ONLY          | ABSENT          |
| P48506     | N Only          | T ONLY          | T ONLY          | T ONLY          | N ONLY          | ABSENT          | T ONLY          | N ONLY          | ABSENT          | N ONLY          |
| P48556     | N Only          | N ONLY          | ABSENT          | ABSENT          | ABSENT          | T ONLY          | ABSENT          | T ONLY          | T ONLY          | N ONLY          |
| P48594     | ABSENT          | ABSENT          | ABSENT          | N ONLY          | ABSENT          | ABSENT          | ABSENT          | ABSENT          | ABSENT          | ABSENT          |
| P48637     | ABSENT          | ABSENT          | ABSENT          | 3               | N ONLY          | 1               | ABSENT          | -2              | -1.5            | -1.5            |
| P48643     | 1               | 1.5             | -4.00           | 9               | -3              | 2               | 1.66666667      | 1               | -1.875          | -2              |
| P48664     | N Only          | N ONLY          | N ONLY          | ABSENT          | ABSENT          | N ONLY          | N ONLY          | ABSENT          | ABSENT          | ABSENT          |
| P48668     | -1.4742268      | -5.78           | -1.55           | -1.4076923      | 1.1056338       | -1.4642857      | 1.67346939      | -1.2244898      | 1.01754386      | 1.62962963      |
| P48681     | T ONLY          | T ONLY          | ABSENT          | T ONLY          | T ONLY          | T ONLY          | ABSENT          | T ONLY          | ABSENT          | T ONLY          |
| P48735     | -1.0666667      | 1.28571429      | -4.25           | 1.28571429      | 1.14285714      | -1.4666667      | 2.25            | 1.33333333      | -4.5            | -3.25           |
| P48739     | -4              | 1.5             | N ONLY          | 1.5             | 1.5             | 1.5             | 2               | T ONLY          | N ONLY          | N ONLY          |
| P48741     | -1.3888889      | -1.6923077      | -1.10           | 2.16666667      | -1.25           | 1.58333333      | 2.57142857      | -1.6666667      | -2.6538462      | -7              |
| P49006     | -1.0666667      | -1.25           | T ONLY          | 4               | 1.2             | 1.77777778      | 3.33333333      | 1.7             | T ONLY          | N ONLY          |
| P49189     | 2.66666667      | 7               | 2.50            | 2.5             | 2               | 5               | 3               | -1.8            | 3.16666667      | -3              |
| P49207     | N Only          | N ONLY          | T ONLY          | T ONLY          | T ONLY          | T ONLY          | N ONLY          | 2               | -1.5            | ABSENT          |
| P49321     | -2              | T ONLY          | ABSENT          | T ONLY          | ABSENT          | ABSENT          | N ONLY          | ABSENT          | N ONLY          | N ONLY          |
| P49327     | 1.33333333      | 1.66666667      | T ONLY          | 13.5            | ABSENT          | 1               | 22              | 1.42857143      | -3              | 1               |
| P49368     | -2              | -1.125          | -2.40           | 3.16666667      | T ONLY          | 1.66666667      | 4.25            | 2.25            | 1.11111111      | -1.1666667      |
| P49411     | 1.33333333      | 3               | -1.67           | 3               | 2               | 1.11111111      | 1.2             | 2               | -8.25           | -2.5            |
| P49418     | ABSENT          | ABSENT          | N ONLY          | N ONLY          | N ONLY          | ABSENT          | N ONLY          | N ONLY          | -12             | N ONLY          |
| P49419     | -1.6666667      | 1.14285714      | T ONLY          | 1.6             | -1.5            | 1.33333333      | 4.66666667      | -1.25           | -2.0625         | -2.5            |
| P49448     | -2.5555556      | 1.3             | 1.20            | 2.2             | 2               | 1.04761905      | 3.88888889      | 1.18181818      | -2.4782609      | 1.06666667      |
| P49588     | -11             | 1               | 1.80            | N ONLY          | -1.2            | -5              | 1.66666667      | 1.55555556      | -1.5            | -5.5            |
| P49589     | -1.5            | N ONLY          | N ONLY          | T ONLY          | 2               | T ONLY          | T ONLY          | T ONLY          | -1.5            | N ONLY          |
| P49590     | ABSENT          | ABSENT          | ABSENT          | T ONLY          | ABSENT          | T ONLY          | ABSENT          | ABSENT          | ABSENT          | ABSENT          |
| P49591     | N Only          | T ONLY          | ABSENT          | T ONLY          | ABSENT          | N ONLY          | T ONLY          | ABSENT          | ABSENT          | 2               |
| P49721     | 1               | 1               | T ONLY          | 2               | T ONLY          | 1.5             | 3               | T ONLY          | -1.5            | -2              |
| P49736     | T ONLY          | T ONLY          | ABSENT          | T ONLY          | ABSENT          | ABSENT          | ABSENT          | T ONLY          | ABSENT          | ABSENT          |
| P49748     | N Only          | -3              | 2.00            | 1               | T ONLY          | 1.33333333      | 1.66666667      | -3              | -1.5            | 2               |
| P49753     | ABSENT          | T ONLY          | ABSENT          |
| P49755     | 2               | -1.3333333      | -3.00           | 2.5             | T ONLY          | 1               | 1.5             | N ONLY          | 1.2             | N ONLY          |
| P49770     | T ONLY          | ABSENT          |
| P49773     | T ONLY          | 1               | 2.00            | -1.5            | T ONLY          | -1.25           | -1.6666667      | 1               | -2.5            | -3.25           |
| P49789     | N Only          | ABSENT          | ABSENT          | N ONLY          | ABSENT          | ABSENT          | ABSENT          | T ONLY          | T ONLY          | N ONLY          |
| P49802     | ABSENT          | ABSENT          | N ONLY          | N ONLY          | ABSENT          | N ONLY          | N ONLY          | ABSENT          | N ONLY          | ABSENT          |
| P49821     | 1               | N ONLY          | N ONLY          | -2              | T ONLY          | -6              | -4              | 1               | N ONLY          | -4              |
| P49959     | ABSENT          |
| P50135     | 1               | 1               | T ONLY          | T ONLY          | T ONLY          | T ONLY          | ABSENT          | T ONLY          | T ONLY          | ABSENT          |
| P50148     | 1               | -1.3333333      | -3.00           | -1.2            | -1.3333333      | -2.25           | 1.83333333      | -1.1666667      | -7.5            | -1.125          |
| P50213     | -10             | -2              | -2.50           | -2.5            | -1.25           | -2.25           | -1.375          | N ONLY          | -15             | -3.1666667      |
| P50395     | -1.375          | -1.8888889      | -4.33           | 1.21428571      | 1.1             | -1.8333333      | 1.3             | 1.375           | -3              | -2              |
| P50402     | 1               | T ONLY          | T ONLY          | ABSENT          | T ONLY          | 1.5             | T ONLY          | T ONLY          | N ONLY          | N ONLY          |
| P50416     | ABSENT          | N ONLY          | ABSENT          | T ONLY          |
| P50440     | ABSENT          | T ONLY          | T ONLY          | ABSENT          |
| P50452     | 1               | 1               | T ONLY          | N ONLY          | N ONLY          | ABSENT          | N ONLY          | N ONLY          | ABSENT          | T ONLY          |
| P50453     | ABSENT          | N ONLY          |
| P50454     | T ONLY          | T ONLY          | ABSENT          | T ONLY          | T ONLY          | T ONLY          | ABSENT          | T ONLY          | 2.66666667      | ABSENT          |
| P50502     | 1.2             | 1.4             | -5.00           | 7               | 6               | 2.6             | 2.33333333      | 2.4             | -1.1785714      | -2.5            |
| P50552     | ABSENT          | ABSENT          | ABSENT          | ABSENT          | ABSENT          | T ONLY          | ABSENT          | T ONLY          | ABSENT          | ABSENT          |

| Protein ID | FC 104T/104N | FC 105T/105N | FC 106T/106N | FC 111T/111N | FC 112T/112N | FC 121T/121N | FC 347T/347N | FC 353T/353N | FC 563T/563N | FC 537T/537N |
|------------|--------------|--------------|--------------|--------------|--------------|--------------|--------------|--------------|--------------|--------------|
| P50570     | -1.6666667   | -2           | -7.00        | -2.6666667   | -1.6666667   | -17          | -1.8         | -5           | N ONLY       | -4.25        |
| P50895     | ABSENT       |
| P50914     | 1.6666667    | 2.5          | 1.00         | T ONLY       | ABSENT       | 1.6          | ABSENT       | ABSENT       | -3           | N ONLY       |
| P50990     | -1.1111111   | 1.35714286   | -2.50        | 3.4          | -1.2         | -1.5         | 1.46666667   | 2.2          | -4.3333333   | 1.52941176   |
| P50991     | -1.5714286   | 1.5          | -2.00        | 3            | -2           | -2.5         | 1.2          | 1.6          | -2.1428571   | 1            |
| P50993     | -1.4736842   | -1.3928571   | 1.22         | -4.6666667   | -1.625       | -2.7777778   | 1.08080808   | -3.0625      | -4.6875      | -2.8142857   |
| P50995     | T ONLY       | 1            | T ONLY       | T ONLY       | T ONLY       | -2           | ABSENT       | 1            | ABSENT       | ABSENT       |
| P51148     | -1.2         | 1.07692308   | 2.25         | 1.875        | 1.14285714   | -1.1538462   | 1.83333333   | -1.1666667   | -1.6153846   | N ONLY       |
| P51149     | -1.3333333   | -3.625       | 1.13         | 1.57142857   | 1.53846154   | -1.7777778   | 1.53333333   | 2            | -1.5833333   | -1.1428571   |
| P51153     | ABSENT       | ABSENT       | ABSENT       | T ONLY       | ABSENT       | T ONLY       | ABSENT       | T ONLY       | -1.5         | ABSENT       |
| P51178     | -2           | -2           | T ONLY       | T ONLY       | ABSENT       | ABSENT       | T ONLY       | T ONLY       | T ONLY       | 1            |
| P51398     | -2           | N ONLY       | ABSENT       | ABSENT       | ABSENT       | ABSENT       | ABSENT       | T ONLY       | ABSENT       | ABSENT       |
| P51452     | -1.4         | N ONLY       | N ONLY       | -1.75        | -2           | -2.3333333   | -3           | N ONLY       | -18          | -1.75        |
| P51513     | ABSENT       | T ONLY       | ABSENT       |
| P51532     | T ONLY       | ABSENT       | ABSENT       | T ONLY       | ABSENT       | ABSENT       | ABSENT       | ABSENT       | N ONLY       | N ONLY       |
| P51570     | ABSENT       | 1            | ABSENT       | ABSENT       | T ONLY       | ABSENT       | T ONLY       | 3            | T ONLY       | ABSENT       |
| P51571     | T ONLY       | N ONLY       | T ONLY       | T ONLY       | T ONLY       | ABSENT       | ABSENT       | T ONLY       | T ONLY       | T ONLY       |
| P51572     | 1            | 2            | 1.00         | 4            | 7            | 2            | 1.33333333   | 2            | 3            | -1.3333333   |
| P51608     | ABSENT       | ABSENT       | N ONLY       | ABSENT       | N ONLY       | ABSENT       | ABSENT       | 1            | ABSENT       | ABSENT       |
| P51610     | ABSENT       |
| P51648     | ABSENT       | T ONLY       | ABSENT       |
| P51649     | -2.3333333   | -1.1428571   | -2.00        | 1.5          | -3           | -2.6666667   | 1.75         | 2.5          | -6           | -4           |
| P51659     | T ONLY       | T ONLY       | 2.50         | T ONLY       | 1.5          | T ONLY       | 4            | 1.75         | 2.66666667   | N ONLY       |
| P51665     | 1            | T ONLY       | ABSENT       | ABSENT       | ABSENT       | -2.5         | 2            | T ONLY       | -1.5         | N ONLY       |
| P51674     | N Only       | 1            | -3.00        | N ONLY       | ABSENT       | N ONLY       | N ONLY       | T ONLY       | -3           | ABSENT       |
| P51805     | ABSENT       | ABSENT       | N ONLY       | ABSENT       | ABSENT       | N ONLY       | N ONLY       | ABSENT       | N ONLY       | N ONLY       |
| P51854     | ABSENT       | T ONLY       |
| P51858     | -2           | T ONLY       | ABSENT       | T ONLY       | ABSENT       | T ONLY       | N ONLY       | 6            | -1.5         | T ONLY       |
| P51884     | ABSENT       | T ONLY       | ABSENT       | ABSENT       |
| P51888     | ABSENT       | N ONLY       | ABSENT       | T ONLY       | ABSENT       | ABSENT       | ABSENT       | T ONLY       | ABSENT       | ABSENT       |
| P51911     | ABSENT       | N ONLY       | ABSENT       | ABSENT       | T ONLY       | ABSENT       | ABSENT       | ABSENT       | ABSENT       | T ONLY       |
| P51991     | -1.4285714   | 3            | N ONLY       | 3.25         | T ONLY       | 1.83333333   | 2            | 10           | N ONLY       | 1            |
| P52209     | -2           | -1.3333333   | -1.33        | 4            | 4            | 2.66666667   | 2            | 1            | -1.05        | 3            |
| P52272     | -1.2857143   | 16           | -2.00        | T ONLY       | -3           | 6            | T ONLY       | 4.33333333   | -1.5         | 3.33333333   |
| P52306     | 1            | -3           | 1.00         | 1            | -2           | -9           | -1.3333333   | -3           | N ONLY       | -4.5         |
| P52565     | N Only       | -4           | -2.50        | 2.5          | N ONLY       | -1.6666667   | 1            | -2           | -3           | N ONLY       |
| P52566     | -2           | 3            | T ONLY       | 2            | T ONLY       | 2            | T ONLY       | 2            | T ONLY       | ABSENT       |
| P52701     | ABSENT       | ABSENT       | ABSENT       | T ONLY       | ABSENT       | ABSENT       | ABSENT       | ABSENT       | ABSENT       | ABSENT       |
| P52788     | ABSENT       | N ONLY       |
| P52789     | -7           | -9           | -5.00        | -9           | 1.66666667   | N ONLY       | -1.625       | 1            | -3.6         | -5.625       |
| P52815     | T ONLY       | T ONLY       | N ONLY       | T ONLY       | ABSENT       | ABSENT       | 1            | ABSENT       | 1.33333333   | 1            |
| P52888     | ABSENT       | 2            | ABSENT       | T ONLY       | ABSENT       | ABSENT       | ABSENT       | T ONLY       | T ONLY       | ABSENT       |
| P52895     | -4           | 1            | T ONLY       | 1            | T ONLY       | T ONLY       | T ONLY       | T ONLY       | 2            | 4            |
| P53004     | -1.6666667   | 1.66666667   | T ONLY       | 4            | 1            | 1.5          | 7            | N ONLY       | 2            | 3            |
| P53007     | -1.6666667   | 1.66666667   | 1.00         | 6            | 2            | 2            | T ONLY       | 1.33333333   | 2            | T ONLY       |
| P53041     | T ONLY       | ABSENT       | ABSENT       | T ONLY       | T ONLY       | N ONLY       | ABSENT       | 2            | ABSENT       | ABSENT       |
| P53396     | N Only       | -4           | T ONLY       | T ONLY       | T ONLY       | ABSENT       | 1.66666667   | -3           | 1.33333333   | -2           |
| P53597     | 1            | -2           | ABSENT       | N ONLY       | T ONLY       | N ONLY       | T ONLY       | 1.5          | ABSENT       | N ONLY       |
| P53618     | 1            | ABSENT       | ABSENT       | T ONLY       | ABSENT       | ABSENT       |
| P53621     | 2            | T ONLY       | ABSENT       | T ONLY       | T ONLY       | T ONLY       | T ONLY       | ABSENT       | -1.5         | ABSENT       |
| P53675     | 1.1          | -6.3333333   | N ONLY       | -1.6153846   | -1.6666667   | -6.75        | -3.0454545   | 2.25         | -33.75       | -13.666667   |
| P53677     | ABSENT       |
| P53999     | ABSENT       | ABSENT       | N ONLY       | T ONLY       | T ONLY       | T ONLY       | ABSENT       | T ONLY       | ABSENT       | ABSENT       |
| P54136     | 1            | T ONLY       | T ONLY       | ABSENT       | ABSENT       | N ONLY       | T ONLY       | ABSENT       | ABSENT       | T ONLY       |
| P54289     | 2            | N ONLY       | N ONLY       | N ONLY       | N ONLY       | -10          | -5           | 1            | -22.5        | N ONLY       |
| P54577     | N Only       | 4            | -2.00        | T ONLY       | T ONLY       | -2           | T ONLY       | 1.5          | N ONLY       | -2.5         |
| P54578     | 1            | -2           | N ONLY       | 3            | 1.5          | -5           | -1.3333333   | -1.5         | -10.5        | N ONLY       |
| P54619     | ABSENT       | ABSENT       | ABSENT       | ABSENT       | ABSENT       | N ONLY       | ABSENT       | N ONLY       | ABSENT       | ABSENT       |
| P54652     | -1.2962963   | -1.3333333   | 1.32         | 2.09090909   | -1.7619048   | -1.3157895   | 1.77272727   | -2.8461538   | -2.7931034   | -3.0555556   |
| P54687     | ABSENT       | ABSENT       | ABSENT       | T ONLY       | ABSENT       | ABSENT       | ABSENT       | T ONLY       | ABSENT       | ABSENT       |
| P54709     | ABSENT       | ABSENT       | ABSENT       | 2            | T ONLY       | ABSENT       | N ONLY       | T ONLY       | ABSENT       | N ONLY       |
| P54727     | T ONLY       | 1.5          | ABSENT       | 7            | T ONLY       | T ONLY       | T ONLY       | T ONLY       | -3           | 2            |

| Protein ID | FC<br>104T/104N | FC<br>105T/105N | FC<br>106T/106N | FC<br>111T/111N | FC<br>112T/112N | FC<br>121T/121N | FC<br>347T/347N | FC<br>353T/353N | FC<br>563T/563N | FC<br>537T/537N |
|------------|-----------------|-----------------|-----------------|-----------------|-----------------|-----------------|-----------------|-----------------|-----------------|-----------------|
| P54819     | ABSENT          | T ONLY          | ABSENT          | T ONLY          | T ONLY          | ABSENT          | ABSENT          | ABSENT          | ABSENT          | 1               |
| P54886     | ABSENT          | T ONLY          | ABSENT          | T ONLY          | ABSENT          | ABSENT          | ABSENT          | ABSENT          | ABSENT          | ABSENT          |
| P54920     | -1.5555556      | -1.2            | -1.88           | -2.4            | 1               | N ONLY          | 1.85714286      | 1.25            | -18             | N ONLY          |
| P55011     | ABSENT          | ABSENT          | ABSENT          | N ONLY          | ABSENT          | ABSENT          | T ONLY          | N ONLY          | ABSENT          | 4               |
| P55060     | -2              | 3               | N ONLY          | 8               | ABSENT          | T ONLY          | T ONLY          | 1               | T ONLY          | ABSENT          |
| P55072     | 1.5             | 1.2             | 1.40            | 2.33333333      | 2               | 1.11111111      | 3.16666667      | 2               | -1.575          | -1.6111111      |
| P55084     | -2.3333333      | 1               | T ONLY          | 3.5             | 1.66666667      | 4.5             | T ONLY          | 1               | -6              | 1.09090909      |
| P55087     | -1.0909091      | -1.5652174      | 3.56            | 8.5             | -1.4285714      | 27              | 1.5             | 3.9             | 10.6666667      | 1.2             |
| P55145     | N Only          | ABSENT          | ABSENT          | T ONLY          | ABSENT          | T ONLY          | ABSENT          | ABSENT          | ABSENT          | ABSENT          |
| P55157     | ABSENT          |
| P55209     | 3               | 2               | ABSENT          | 3               | ABSENT          | ABSENT          | N ONLY          | T ONLY          | 1.33333333      | N ONLY          |
| P55265     | N Only          | T ONLY          | ABSENT          | T ONLY          | ABSENT          | T ONLY          | ABSENT          | ABSENT          | ABSENT          | ABSENT          |
| P55268     | T ONLY          | ABSENT          | ABSENT          | T ONLY          | ABSENT          | ABSENT          | T ONLY          | T ONLY          | T ONLY          | T ONLY          |
| P55283     | ABSENT          |
| P55327     | ABSENT          | N ONLY          | N ONLY          | 4               | 1               | N ONLY          | -2              | N ONLY          | N ONLY          | N ONLY          |
| P55735     | -2              | ABSENT          | ABSENT          | ABSENT          | ABSENT          | 1               | ABSENT          | T ONLY          | N ONLY          | ABSENT          |
| P55769     | 2               | T ONLY          | ABSENT          | T ONLY          |
| P55786     | -2              | -2.0833333      | -1.67           | 1               | -1.0833333      | 1               | 2.53333333      | 2.5             | -1.5576923      | -1.40625        |
| P55809     | N Only          | -1.1666667      | -3.00           | -3              | -2              | -20             | -2.6666667      | -1.25           | N ONLY          | -7.5            |
| P55884     | -3              | 2               | T ONLY          | T ONLY          | ABSENT          | T ONLY          | ABSENT          | N ONLY          | ABSENT          | 1               |
| P56134     | -2.5            | N ONLY          | N ONLY          | -2.6666667      | 4               | N ONLY          | -2.5            | ABSENT          | -4.5            | -10             |
| P56192     | T ONLY          | 1.5             | N ONLY          | T ONLY          | -1.5            |
| P56199     | ABSENT          |
| P56211     | -4              | -2              | -3.00           | T ONLY          | T ONLY          | -3              | N ONLY          | 1.5             | N ONLY          | 1               |
| P56385     | N Only          | -2              | N ONLY          | N ONLY          | 1               | ABSENT          | ABSENT          | ABSENT          | N ONLY          | N ONLY          |
| P56537     | ABSENT          | ABSENT          | ABSENT          | T ONLY          | ABSENT          | T ONLY          | N ONLY          | T ONLY          | ABSENT          | ABSENT          |
| P56545     | ABSENT          | ABSENT          | N ONLY          | T ONLY          | ABSENT          | N ONLY          | N ONLY          | ABSENT          | N ONLY          | N ONLY          |
| P56556     | 1               | N ONLY          | -2.00           | ABSENT          | T ONLY          | N ONLY          | N ONLY          | ABSENT          | N ONLY          | N ONLY          |
| P57088     | 1.66666667      | ABSENT          | ABSENT          | ABSENT          | ABSENT          | 2               | 3               | ABSENT          | N ONLY          | T ONLY          |
| P57737     | ABSENT          |
| P58107     | N Only          | -5              | T ONLY          | T ONLY          | ABSENT          | T ONLY          | T ONLY          | 3               | T ONLY          | 2               |
| P58546     | -2              | N ONLY          | N ONLY          | T ONLY          | T ONLY          | T ONLY          | N ONLY          | 1               | 2               | N ONLY          |
| P59780     | ABSENT          | ABSENT          | ABSENT          | T ONLY          | ABSENT          | N ONLY          | ABSENT          | ABSENT          | N ONLY          | ABSENT          |
| P59998     | 1.42857143      | N ONLY          | -1.14           | 1.71428571      | 3               | -1.5714286      | 2               | 1.4             | -2.625          | -2              |
| P60174     | -1.6956522      | -2              | 1.07            | -1.4761905      | 1.375           | -1.9333333      | -1.4444444      | 1.45            | -1.4642857      | -2.15           |
| P60201     | -1.6190476      | -20.72          | -1.08           | -6.5925926      | -2.8345679      | -1.7941176      | 1.37724551      | -28.666667      | -1.903481       | -1.2890411      |
| P60228     | ABSENT          | ABSENT          | ABSENT          | T ONLY          | ABSENT          | ABSENT          | ABSENT          | ABSENT          | ABSENT          | ABSENT          |
| P60468     | ABSENT          | ABSENT          | ABSENT          | T ONLY          | ABSENT          | ABSENT          | ABSENT          | T ONLY          | ABSENT          | T ONLY          |
| P60520     | N Only          | N ONLY          | -3.00           | N ONLY          | N ONLY          | N ONLY          | -2              | 2               | -1.5            | -4.5            |
| P60660     | 4.33333333      | -3.5            | 2.00            | 3.33333333      | 5               | 1.75            | 1.25            | 6               | 1.6             | 1.66666667      |
| P60709     | -1.2808219      | 1.42777778      | 1.01            | 1.92207792      | 1.48571429      | -1.0555556      | 1.33088235      | 1.41958042      | -1.9716495      | -1.6857143      |
| P60842     | 1.5             | T ONLY          | N ONLY          | 9               | 4               | 1.5             | 2.5             | 1.33333333      | -4.5            | -1.25           |
| P60866     | 1               | -1.6666667      | -4.00           | T ONLY          | T ONLY          | 1.5             | 3               | T ONLY          | 1.33333333      | 2               |
| P60880     | N Only          | N ONLY          | -7.50           | N ONLY          | -3.75           | N ONLY          | -2.5555556      | N ONLY          | N ONLY          | -2.8888889      |
| P60891     | 1               | 1.5             | T ONLY          | N ONLY          | T ONLY          | 2               | T ONLY          | 1.5             | -2.1            | 2               |
| P60900     | N Only          | 2               | -2.00           | 3               | 2               | 1               | 2               | 1               | -3              | -1.25           |
| P60903     | ABSENT          | N ONLY          | T ONLY          | T ONLY          | ABSENT          | ABSENT          | T ONLY          | ABSENT          | T ONLY          | T ONLY          |
| P60981     | 1               | 2               | -1.50           | 4               | 3               | 1               | -1.5            | 2               | -4.5            | -6              |
| P60983     | 1               | -1.5            | 1.00            | 1               | 2.5             | -3              | T ONLY          | 1               | -1.5            | 1               |
| P61006     | -1.5            | N ONLY          | ABSENT          | T ONLY          | T ONLY          | T ONLY          | 1               | -2              | 1               | 1.33333333      |
| P61009     | T ONLY          | ABSENT          | ABSENT          | T ONLY          | ABSENT          | T ONLY          | ABSENT          | ABSENT          | 2               | 2               |
| P61018     | ABSENT          | ABSENT          | ABSENT          | N ONLY          | T ONLY          | N ONLY          | N ONLY          | ABSENT          | N ONLY          | N ONLY          |
| P61019     | -2.25           | -5              | -3.75           | 1.72727273      | 1.28571429      | -3.25           | 1               | 3               | -2.1666667      | -5.25           |
| P61020     | -3.5            | -1.1            | 1.25            | 1.42857143      | 1               | -1.8333333      | 1.4             | -1.75           | -2.5            | N ONLY          |
| P61026     | -1.5            | -3.6666667      | 1.00            | -2.3333333      | 1.33333333      | -2              | 1.33333333      | 1               | -1.5            | -2              |
| P61081     | T ONLY          | N ONLY          | N ONLY          | T ONLY          | N ONLY          | -1.5            | 1               | N ONLY          | -4.5            | 2               |
| P61086     | 1.5             | 2               | ABSENT          | 1               | 1               | 2               | -3              | ABSENT          | -4.5            | N ONLY          |
| P61088     | 1.4             | -1.2857143      | 1.00            | 2               | 2.33333333      | -2              | -2.3333333      | 3               | -2              | -3.5            |
| P61106     | -1.2857143      | -1.4            | -1.50           | 5.33333333      | 1.14285714      | -3              | -2              | 2               | -7.5            | -2.1666667      |
| P61158     | T ONLY          | 3               | -2.50           | 1.5             | T ONLY          | 1               | -2              | 1               | N ONLY          | N ONLY          |
| P61160     | 1.5             | 4               | -2.50           | -1.25           | 1.5             | 1.33333333      | -1.3333333      | 1.16666667      | -2.7            | -3.5            |
| P61163     | 1               | 1               | N ONLY          | 1               | N ONLY          | N ONLY          | 1               | 2               | -3              | N ONLY          |

| Protein ID | FC<br>104T/104N | FC<br>105T/105N | FC<br>106T/106N | FC<br>111T/111N | FC<br>112T/112N | FC<br>121T/121N | FC<br>347T/347N | FC<br>353T/353N | FC<br>563T/563N | FC<br>537T/537N |
|------------|-----------------|-----------------|-----------------|-----------------|-----------------|-----------------|-----------------|-----------------|-----------------|-----------------|
| P61204     | -1.125          | -9              | -6.75           | -1.0322581      | 1.25            | -2.5384615      | -3.8            | -1.1666667      | -2.2924528      | -1.5            |
| P61221     | ABSENT          | ABSENT          | ABSENT          | ABSENT          | ABSENT          | T ONLY          | ABSENT          | ABSENT          | ABSENT          | ABSENT          |
| P61224     | -2.5            | -1.4            | -5.00           | -13             | -1.8            | 1               | -1.3333333      | -2              | -2              | -1.125          |
| P61225     | N Only          | N ONLY          | -8.00           | 1               | N ONLY          | -6              | -6              | N ONLY          | -15             | -3.5            |
| P61247     | 2               | T ONLY          | 3               | N ONLY          | N ONLY          |
| P61254     | -2              | 3               | N ONLY          | T ONLY          | T ONLY          | 2               | ABSENT          | 1               | 7.3333333       | N ONLY          |
| P61266     | N Only          | N ONLY          | -8.00           | N ONLY          | N ONLY          | -8              | -2              | 1               | N ONLY          | -6.5            |
| P61313     | N Only          | ABSENT          | ABSENT          | T ONLY          | ABSENT          | ABSENT          | ABSENT          | ABSENT          | T ONLY          | ABSENT          |
| P61353     | -1.5            | -2              | N ONLY          | T ONLY          | T ONLY          | T ONLY          | ABSENT          | T ONLY          | T ONLY          | 2               |
| P61421     | N Only          | N ONLY          | -10.00          | N ONLY          | T ONLY          | -11             | -2              | N ONLY          | -28.5           | N ONLY          |
| P61586     | -1.5            | N ONLY          | N ONLY          | 2               | ABSENT          | -1.6666667      | T ONLY          | 1               | T ONLY          | T ONLY          |
| P61601     | -3              | N ONLY          | N ONLY          | 1.2             | -1.5            | N ONLY          | N ONLY          | -2              | -6.5            | -5.5            |
| P61604     | -2.7            | 1               | -1.17           | 1.45454545      | 1.28571429      | 1.16666667      | 1               | 3.71428571      | -2.2173913      | -1.4285714      |
| P61758     | -2              | 1               | ABSENT          | T ONLY          | T ONLY          | N ONLY          | 1               | T ONLY          | ABSENT          | -1.5            |
| P61764     | N Only          | -10.333333      | -10.20          | -61             | -5.2            | -189            | -4.2413793      | -13.333333      | -93.75          | -10.333333      |
| P61769     | -1.1666667      | N ONLY          | N ONLY          | 1               | T ONLY          | T ONLY          | 2               | T ONLY          | 5.3333333       | N ONLY          |
| P61803     | 1               | N ONLY          | ABSENT          | T ONLY          | ABSENT          | T ONLY          | ABSENT          | 1               | ABSENT          | ABSENT          |
| P61923     | T ONLY          | T ONLY          | ABSENT          | T ONLY          | T ONLY          | T ONLY          | ABSENT          | T ONLY          | ABSENT          | ABSENT          |
| P61956     | -2.3333333      | 2               | -3.00           | 7               | 1               | 1.2             | 3               | 3.5             | -1.5            | -2.5            |
| P61978     | 1.1             | 2.125           | 1.75            | 16              | T ONLY          | 1.6666667       | 2               | 5.3333333       | N ONLY          | 1.71428571      |
| P61981     | -2.2142857      | -1.5952381      | 1.09            | 1.15942029      | 2.40740741      | -2.4193548      | 1.16981132      | -1.0769231      | -4              | -2.78125        |
| P62081     | N Only          | N ONLY          | ABSENT          | ABSENT          | ABSENT          | ABSENT          | N ONLY          | ABSENT          | T ONLY          | N ONLY          |
| P62136     | -1.3333333      | N ONLY          | ABSENT          | T ONLY          | N ONLY          | N ONLY          | 1               | T ONLY          | N ONLY          | N ONLY          |
| P62140     | -1.5            | 2               | 2.00            | 1.5             | -5              | 1.3333333       | 1               | 2.5             | -6              | N ONLY          |
| P62158     | 1.14285714      | N ONLY          | -11.50          | 1.42857143      | 1.30769231      | -4.625          | -1.2727273      | -1.2222222      | -6.2142857      | -8.5            |
| P62166     | N Only          | N ONLY          | N ONLY          | -2              | ABSENT          | N ONLY          | N ONLY          | ABSENT          | ABSENT          | -2              |
| P62191     | ABSENT          | T ONLY          | ABSENT          | T ONLY          | ABSENT          | T ONLY          | ABSENT          | N ONLY          | N ONLY          | ABSENT          |
| P62195     | 2               | ABSENT          | T ONLY          | T ONLY          | T ONLY          | ABSENT          | -2              | 3               | N ONLY          | N ONLY          |
| P62241     | -3              | 3               | 3.00            | T ONLY          | T ONLY          | 2               | 2               | 3               | 1.3333333       | T ONLY          |
| P62244     | -4              | 2.5             | -2.00           | T ONLY          | 4               | 1               | 1               | 3               | T ONLY          | N ONLY          |
| P62249     | -1.1428571      | N ONLY          | -1.50           | 3.6666667       | T ONLY          | 2               | 2               | T ONLY          | -1.5            | 3.3333333       |
| P62258     | -1.25           | 1.08163265      | 1.59            | 1.08791209      | 1.6122449       | 1.23287671      | 1.20289855      | -1.3333333      | -2.2916667      | -2.1785714      |
| P62263     | 2               | 1               | 1.33            | 2.3333333       | 1               | 1.8             | 1               | 3.5             | -1.875          | 1               |
| P62266     | 1.3333333       | 1               | 1.00            | T ONLY          | T ONLY          | 1.5             | 1               | T ONLY          | 2               | N ONLY          |
| P62269     | 1.375           | 1.375           | 5.00            | 5.5             | 5               | 1.25            | 2.3333333       | 9               | 1.42857143      | 4.6666667       |
| P62277     | 1               | N ONLY          | N ONLY          | T ONLY          | T ONLY          | 1               | 3               | T ONLY          | -1.75           | 2               |
| P62280     | 1               | T ONLY          | ABSENT          | T ONLY          | ABSENT          | 1               | T ONLY          | T ONLY          | -1.5            | ABSENT          |
| P62304     | -1.5            | N ONLY          | N ONLY          | T ONLY          | T ONLY          | ABSENT          | 2               | T ONLY          | T ONLY          | ABSENT          |
| P62308     | 5               | ABSENT          | ABSENT          | T ONLY          | ABSENT          | ABSENT          | ABSENT          | ABSENT          | ABSENT          | ABSENT          |
| P62312     | -2              | ABSENT          | ABSENT          | T ONLY          | T ONLY          | ABSENT          | ABSENT          | T ONLY          | ABSENT          | ABSENT          |
| P62316     | N Only          | 3               | 1.00            | T ONLY          | T ONLY          | 1               | T ONLY          | 3               | ABSENT          | ABSENT          |
| P62318     | -1.5            | 2               | -2.00           | T ONLY          | 3               | 1.5             | T ONLY          | T ONLY          | N ONLY          | 2               |
| P62330     | 1               | N ONLY          | -2.00           | -1.5            | T ONLY          | N ONLY          | T ONLY          | N ONLY          | -2.25           | N ONLY          |
| P62333     | N Only          | 1               | N ONLY          | 3               | ABSENT          | N ONLY          |
| P62424     | 1.6             | 1.2             | 2.00            | T ONLY          | 1               | 3               | 5               | 1               | 1.1666667       | 2               |
| P62491     | -1.8571429      | 1.28571429      | T ONLY          | 1.77777778      | 1.14285714      | 1.71428571      | 1.28571429      | 5               | 1.48148148      | -2.125          |
| P62495     | ABSENT          | ABSENT          | ABSENT          | T ONLY          | ABSENT          | ABSENT          | ABSENT          | T ONLY          | ABSENT          | ABSENT          |
| P62701     | -4              | 2.2             | 1.00            | 7               | T ONLY          | 1.5             | T ONLY          | 1.5             | -3              | 4               |
| P62714     | -1.5            | 3               | -1.50           | 2               | 1               | -2.5            | 1               | T ONLY          | N ONLY          | 1               |
| P62750     | 1.5             | 1.5             | -1.50           | 4               | T ONLY          | 5               | N ONLY          | N ONLY          | 1.3333333       | 1.6             |
| P62753     | 1               | -2              | -2.00           | ABSENT          | ABSENT          | 3.5             | T ONLY          | 3               | 1.3333333       | T ONLY          |
| P62760     | -3.25           | N ONLY          | -16.00          | -22.5           | -1.1111111      | -42             | -3              | N ONLY          | -126            | -3.5714286      |
| P62805     | -1.4052632      | -1.1979167      | -1.16           | 4.85507246      | 1.52941176      | 1.66233766      | 2.23076923      | 4.82            | 1.10622711      | 1.01886792      |
| P62820     | -3              | -4              | T ONLY          | 1               | T ONLY          | 1.3333333       | T ONLY          | 1               | T ONLY          | N ONLY          |
| P62826     | -2.75           | 1.09090909      | -3.00           | 3.3333333       | 2.3333333       | 1.36363636      | 2               | 2               | 1.41666667      | -2.5            |
| P62829     | 4               | -2.5            | -4.00           | T ONLY          | T ONLY          | -1.3333333      | 1               | T ONLY          | -1.5            | N ONLY          |
| P62834     | -2.5            | -1.4            | -5.00           | -12             | -1.8            | 1               | -1.3333333      | -2              | -2              | -1.25           |
| P62841     | N Only          | T ONLY          | ABSENT          | ABSENT          | ABSENT          | ABSENT          | ABSENT          | ABSENT          | N ONLY          | N ONLY          |
| P62847     | 3               | T ONLY          | T ONLY          | T ONLY          | ABSENT          | 2               | T ONLY          | T ONLY          | ABSENT          | 2               |
| P62851     | 5.5             | 1.5             | -3.00           | T ONLY          | T ONLY          | 2               | 2               | T ONLY          | 1.3333333       | 1               |
| P62857     | -1.125          | N ONLY          | 1.00            | 8               | 2               | 3               | N ONLY          | 2               | 1.3333333       | -1.5            |
| P62861     | 2               | ABSENT          | T ONLY          | T ONLY          | N ONLY          | ABSENT          | ABSENT          | ABSENT          | ABSENT          | ABSENT          |

| Protein ID | FC<br>104T/104N | FC<br>105T/105N | FC<br>106T/106N | FC<br>111T/111N | FC<br>112T/112N | FC<br>121T/121N | FC<br>347T/347N | FC<br>353T/353N | FC<br>563T/563N | FC<br>537T/537N |
|------------|-----------------|-----------------|-----------------|-----------------|-----------------|-----------------|-----------------|-----------------|-----------------|-----------------|
| P62888     | 5               | 1               | ABSENT          |
| P62899     | 1               | 3               | ABSENT          | N ONLY          | N ONLY          | 1               | N ONLY          | 1               | 2.66666667      | N ONLY          |
| P62906     | 1.5             | 3               | 1.00            | N ONLY          | N ONLY          | T ONLY          | N ONLY          | T ONLY          | -4.5            | -1.5            |
| P62913     | N Only          | T ONLY          | T ONLY          | T ONLY          | 1               | 3               | T ONLY          | 1               | 1               | ABSENT          |
| P62917     | -1.5            | 1.33333333      | T ONLY          | T ONLY          | T ONLY          | 1.33333333      | 1.5             | 1               | 1.66666667      | -1.5            |
| P62937     | -1.5813953      | -4.3333333      | 1.00            | 1.38297872      | -1.56           | -1.66666667     | -1.483871       | 1.53846154      | -3.0365854      | -1.95           |
| P62979     | -2.5333333      | -3.25           | -1.33           | 1.44            | 1               | -1.125          | 2.08333333      | 2               | -1.5            | -1.8333333      |
| P62993     | N Only          | ABSENT          | -2.00           | N ONLY          | ABSENT          | N ONLY          | N ONLY          | 3               | 4               | -2              |
| P63010     | N Only          | -3              | -19.00          | -4              | 2.5             | -15             | -1.5            | -1.75           | -27             | -6.5            |
| P63092     | 1               | 1               | N ONLY          | -1.2857143      | 2               | N ONLY          | 1.66666667      | -1.25           | -19.5           | -4.5            |
| P63096     | 1.33333333      | -2              | -8.50           | -3.66666667     | -1.25           | N ONLY          | -1.7142857      | 1.33333333      | -21.5           | N ONLY          |
| P63098     | N Only          | N ONLY          | N ONLY          | 1               | -1.5            | N ONLY          | -6              | 2               | -9              | N ONLY          |
| P63104     | -1.7333333      | -1.3571429      | 1.00            | 1.16129032      | 2.30434783      | -2.4230769      | 1               | 2               | -3.1956522      | -2.6            |
| P63151     | N Only          | ABSENT          | N ONLY          | T ONLY          | ABSENT          | ABSENT          | T ONLY          | N ONLY          | N ONLY          | N ONLY          |
| P63162     | T ONLY          | T ONLY          | N ONLY          | T ONLY          | ABSENT          | ABSENT          | ABSENT          | ABSENT          | ABSENT          | ABSENT          |
| P63167     | 1               | N ONLY          | N ONLY          | 1.5             | T ONLY          | ABSENT          | N ONLY          | T ONLY          | -1.5            | N ONLY          |
| P63173     | -2              | ABSENT          | ABSENT          | T ONLY          | ABSENT          | ABSENT          | ABSENT          | ABSENT          | ABSENT          | ABSENT          |
| P63220     | 4               | 5               | T ONLY          | T ONLY          | T ONLY          | 3               | T ONLY          | 4               | -1.2857143      | 1.33333333      |
| P63241     | 4               | N ONLY          | T ONLY          | 2               | T ONLY          | 1               | -3              | ABSENT          | -4.5            | 2               |
| P63244     | -1.3333333      | 2.5             | -3.00           | 6               | T ONLY          | 2               | 6               | 7               | 1.66666667      | N ONLY          |
| P63261     | -1.2808219      | 1.42777778      | 1.01            | 1.92207792      | 1.48571429      | -1.0555556      | 1.33088235      | 1.41958042      | -1.9716495      | -1.6857143      |
| P63279     | N Only          | N ONLY          | ABSENT          | T ONLY          | ABSENT          | 1               | ABSENT          | T ONLY          | ABSENT          | ABSENT          |
| P67775     | -1.5            | 3               | -1.50           | 2               | 1               | -2.5            | 1               | T ONLY          | N ONLY          | 1               |
| P67812     | 1               | ABSENT          | ABSENT          | T ONLY          | T ONLY          | ABSENT          | ABSENT          | ABSENT          | T ONLY          | ABSENT          |
| P67870     | -2              | T ONLY          | 1.00            | T ONLY          | T ONLY          | N ONLY          | N ONLY          | 1               | -1.5            | ABSENT          |
| P67936     | 1.07692308      | -1.75           | 2.00            | 1.5             | 1.66666667      | 1.27272727      | -1.11111111     | 1.44444444      | -1.3421053      | 1.6             |
| P68036     | N Only          | -2              | -2.00           | 1               | 1               | T ONLY          | 1               | 1               | -3              | 2               |
| P68104     | 1.45454545      | 1.46            | 1.77            | 9.41176471      | 1.66666667      | 1.5862069       | 1.86206897      | 1.41935484      | -1.0588235      | 1.04225352      |
| P68366     | -2              | -6.1428571      | -8.20           | -9.1            | -4.8181818      | -26             | -3.2121212      | -4.5            | -6.2205882      | -2.9545455      |
| P68371     | -1.7386364      | -1.2677824      | -1.12           | -1.1043257      | -1.8691983      | -2.793722       | 1.06698565      | -2.3434343      | -3.4655172      | -2.8851351      |
| P68402     | -2              | -5              | 1.33            | -1.5            | 2               | 2               | 2               | ABSENT          | -1.5            | -2.5            |
| P68871     | -3.0892857      | -4.1808511      | -2.54           | 1.83793103      | 2.87557604      | -1.5528846      | -1.1911357      | 2.60194175      | 1.37327189      | 1.08225108      |
| P69891     | -8.3333333      | -14.5           | -2.69           | 2.14285714      | 4.61764706      | -3.4375         | 1.87804878      | 3.125           | 1.02564103      | -2.2857143      |
| P69892     | -8.3333333      | -12.428571      | -2.66           | 2.10714286      | 4.67647059      | -3.7857143      | 1.87804878      | 3.25            | 1.02564103      | -2.2857143      |
| P69905     | -2.7575758      | -13.6666667     | -5.64           | 2.12            | 4.875           | -2.0526316      | -1.2692308      | 3               | -1.3359375      | 1.47826087      |
| P78324     | N Only          | N ONLY          | -5.33           | N ONLY          | N ONLY          | N ONLY          | -6.6666667      | -2.4444444      | -18.75          | -26             |
| P78330     | ABSENT          | T ONLY          | ABSENT          | ABSENT          | ABSENT          | T ONLY          | T ONLY          | ABSENT          | ABSENT          | ABSENT          |
| P78347     | 1               | T ONLY          | ABSENT          | 6               | ABSENT          | T ONLY          | ABSENT          | T ONLY          | ABSENT          | ABSENT          |
| P78352     | ABSENT          | ABSENT          | N ONLY          | N ONLY          | ABSENT          | N ONLY          | N ONLY          | ABSENT          | N ONLY          | N ONLY          |
| P78357     | N Only          | N ONLY          | N ONLY          | -11             | -7              | N ONLY          | 1.5             | N ONLY          | -7.5            | -2.0714286      |
| P78371     | -1.3333333      | 6               | T ONLY          | 12              | 1               | 1               | 5               | 3               | -1.5            | N ONLY          |
| P78386     | ABSENT          | ABSENT          | ABSENT          | T ONLY          | ABSENT          | ABSENT          | ABSENT          | ABSENT          | N ONLY          | ABSENT          |
| P78417     | 2               | -2              | -2.33           | -2.25           | 1               | 2               | 1               | 2               | -1.8            | -5              |
| P78527     | 1.55555556      | -1.5            | N ONLY          | T ONLY          | -3              | T ONLY          | ABSENT          | T ONLY          | T ONLY          | ABSENT          |
| P78559     | -1.3571429      | -2.6            | -1.50           | -1.0714286      | 1.06666667      | -2.8571429      | 1.13333333      | -2.6            | -3.5357143      | -3              |
| P80404     | -1.5            | -1.5            | N ONLY          | 1               | ABSENT          | -2.5            | 1.5             | 4               | -4.5            | -3              |
| P80723     | -3.4166667      | -2.9090909      | -1.75           | -5.4444444      | -4.6666667      | -5.4            | -4              | -2.6875         | -4.05           | -17.5           |
| P81605     | -2.2            | -4.4            | -2.00           | 1.95            | 1.15            | 1.44            | 4.42857143      | -4.6666667      | T ONLY          | 2               |
| P82979     | ABSENT          | T ONLY          | ABSENT          | T ONLY          | ABSENT          | T ONLY          | T ONLY          | 2               | ABSENT          | N ONLY          |
| P83731     | -1.5            | -1.5            | -2.00           | 11              | T ONLY          | 2.5             | 2               | 2               | 2.66666667      | -1.75           |
| P84074     | -3              | N ONLY          | N ONLY          | 1.33333333      | -5              | N ONLY          | N ONLY          | -3              | -8.5            | -4              |
| P84077     | -1.125          | -9              | -6.75           | -1.0322581      | 1.25            | -2.5384615      | -3.8            | -1.1666667      | -2.2924528      | -1.5            |
| P84085     | 1.13636364      | -7.5            | -6.00           | 1               | 1.375           | -2              | -3.3            | -1.8            | -2.4782609      | -1.7058824      |
| P84090     | -2              | ABSENT          | N ONLY          | T ONLY          | T ONLY          | 1               | ABSENT          | T ONLY          | T ONLY          | ABSENT          |
| P84098     | 1.5             | T ONLY          | N ONLY          | T ONLY          | 2               | 1.5             | 2               | 2               | 2.66666667      | ABSENT          |
| P84103     | N Only          | T ONLY          | N ONLY          | 5               | T ONLY          | ABSENT          | ABSENT          | T ONLY          | T ONLY          | 2               |
| P98160     | 3.5             | N ONLY          | 1.00            | T ONLY          | T ONLY          | N ONLY          | ABSENT          | T ONLY          | T ONLY          | T ONLY          |
| P98179     | ABSENT          | T ONLY          | ABSENT          | 2               |
| P99999     | -4              | -1.6666667      | -3.80           | -1.25           | -1.6666667      | -3.5            | -1.6666667      | 1.25            | -8.25           | -4              |
| Q00056     | N Only          | N ONLY          | ABSENT          | T ONLY          | T ONLY          | ABSENT          | 2               | ABSENT          | T ONLY          | ABSENT          |
| Q00059     | -2              | 1               | T ONLY          | 1               | T ONLY          | 1               | -2              | 2               | -3              | 1.33333333      |
| Q00169     | T ONLY          | T ONLY          | 1.00            | ABSENT          | ABSENT          | ABSENT          | N ONLY          | ABSENT          | -4.5            | N ONLY          |

| Protein ID | FC<br>104T/104N | FC<br>105T/105N | FC<br>106T/106N | FC<br>111T/111N | FC<br>112T/112N | FC<br>121T/121N | FC<br>347T/347N | FC<br>353T/353N | FC<br>563T/563N | FC<br>537T/537N |
|------------|-----------------|-----------------|-----------------|-----------------|-----------------|-----------------|-----------------|-----------------|-----------------|-----------------|
| Q00325     | -1.3333333      | -2              | -7.00           | 2.2             | 4               | -1.5            | -1.3333333      | 2.3333333       | -1.875          | -1.5833333      |
| Q00341     | ABSENT          | T ONLY          | N ONLY          | N ONLY          |
| Q00534     | ABSENT          |
| Q00535     | ABSENT          | N ONLY          | -2.00           | N ONLY          | N ONLY          | N ONLY          | T ONLY          | 1               | N ONLY          | 1.3333333       |
| Q00577     | N Only          | 2               | 2.00            | -2              | T ONLY          | -3              | 1.6666667       | 3               | -3              | -1.5            |
| Q00610     | 1.1147541       | -2.8            | -9.85           | -1.3114754      | -1.0625         | -4.4074074      | -2.5151515      | 2               | -7.1666667      | -8.6428571      |
| Q00688     | 1.25            | -1.5            | -2.00           | 1.3333333       | 3               | 3               | 4               | 2               | N ONLY          | 1               |
| Q00765     | N Only          | N ONLY          | -4.00           | 3               | -2              | -3.6666667      | -1.5            | 2.5             | -2.1            | N ONLY          |
| Q00796     | ABSENT          | 3               | T ONLY          | ABSENT          | ABSENT          | ABSENT          | ABSENT          | T ONLY          | ABSENT          | ABSENT          |
| Q00839     | 1.19047619      | 6               | -1.50           | 10              | 6               | T ONLY          | 11              | 3.4             | 7.3333333       | -1.125          |
| Q01082     | -1.2            | -3.1481481      | 1.12            | -1.5339806      | -1.2650602      | -3.0169492      | 1.03703704      | -1.2898551      | -1.9135135      | -2.4513889      |
| Q01105     | 1.57142857      | 2.5             | -2.00           | 14              | 1.3333333       | 2.3333333       | T ONLY          | T ONLY          | 1.3333333       | 4               |
| Q01469     | ABSENT          | N ONLY          | ABSENT          | T ONLY          | T ONLY          | N ONLY          | ABSENT          | ABSENT          | T ONLY          | N ONLY          |
| Q01484     | -2.5            | -3.6666667      | -2.10           | -2.6666667      | N ONLY          | -14             | -2.1428571      | 5.5             | -20.25          | N ONLY          |
| Q01518     | -2              | 1.6666667       | -1.50           | 1               | -2              | -2.5            | 3               | 4               | 1.1111111       | 1               |
| Q01546     | -3.3684211      | -4.72           | -1.68           | -1.2604167      | 1.14084507      | 1.04477612      | 1               | -1.3870968      | -1.0102041      | 2               |
| Q01581     | ABSENT          |
| Q01813     | -4.6666667      | N ONLY          | -3.40           | -1.5714286      | -2.8            | N ONLY          | 1               | 2               | -3              | -3.1            |
| Q01814     | 1.6666667       | 2               | -5.00           | -1.6666667      | N ONLY          | -3.2222222      | -6.75           | 3               | -21             | N ONLY          |
| Q01995     | 1.75            | N ONLY          | T ONLY          | 1.75            | T ONLY          | -2              | 1               | -3              | 3.3333333       | 7.25            |
| Q02127     | ABSENT          |
| Q02153     | ABSENT          | ABSENT          | N ONLY          | ABSENT          | ABSENT          | ABSENT          | T ONLY          | T ONLY          | ABSENT          | ABSENT          |
| Q02156     | ABSENT          | N ONLY          | -2              | ABSENT          | ABSENT          | N ONLY          |
| Q02218     | -4              | -5              | -3.00           | N ONLY          | -2              | N ONLY          | 1.25            | T ONLY          | T ONLY          | -7.5            |
| Q02246     | ABSENT          | ABSENT          | ABSENT          | N ONLY          | T ONLY          | N ONLY          | ABSENT          | N ONLY          | ABSENT          | -5              |
| Q02252     | -9              | -1.1538462      | 4.00            | 2               | -6              | -3              | -1.3333333      | 1.2             | -7.5            | -1.7857143      |
| Q02338     | ABSENT          | ABSENT          | N ONLY          | ABSENT          | ABSENT          | -2              | T ONLY          | N ONLY          | N ONLY          | -2              |
| Q02539     | 2.4444444       | 5               | 2.20            | 2.9             | -4              | 6.3333333       | 5.6666667       | 1.75            | -1.5            | -1.2631579      |
| Q02543     | 1               | ABSENT          | ABSENT          | T ONLY          | ABSENT          | T ONLY          | ABSENT          | T ONLY          | -1.5            | N ONLY          |
| Q02750     | N Only          | -8.25           | N ONLY          |
| Q02790     | N Only          | 2               | T ONLY          | T ONLY          | ABSENT          | T ONLY          | ABSENT          | 3               | 1.3333333       | ABSENT          |
| Q02818     | ABSENT          | T ONLY          | ABSENT          | T ONLY          |
| Q02878     | 1.4             | -1.3333333      | ABSENT          | T ONLY          | T ONLY          | 2.5             | 2               | 1.5             | 1               | T ONLY          |
| Q02880     | T ONLY          | T ONLY          | ABSENT          | T ONLY          | ABSENT          | T ONLY          | ABSENT          | ABSENT          | ABSENT          | ABSENT          |
| Q02952     | ABSENT          | ABSENT          | N ONLY          | T ONLY          | T ONLY          | ABSENT          | T ONLY          | ABSENT          | ABSENT          | -1.5            |
| Q02978     | -3.3333333      | -2.6666667      | -1.83           | -9              | -3              | -8              | 1.5             | 1               | -13.5           | -3.25           |
| Q03001     | N Only          | ABSENT          | ABSENT          | ABSENT          | N ONLY          | T ONLY          | 2               | ABSENT          | ABSENT          | N ONLY          |
| Q03135     | ABSENT          | ABSENT          | ABSENT          | T ONLY          | T ONLY          | ABSENT          | ABSENT          | ABSENT          | ABSENT          | ABSENT          |
| Q03252     | -7              | 1.8888889       | 3.00            | T ONLY          | -2              | 1.3333333       | 5.5             | -1.2727273      | -4.5            | 1.5555556       |
| Q04609     | ABSENT          | ABSENT          | ABSENT          | ABSENT          | ABSENT          | ABSENT          | T ONLY          | N ONLY          | ABSENT          | N ONLY          |
| Q04695     | 1.06451613      | -5.7777778      | -2.48           | -1.7572816      | 1.29787234      | -1.1111111      | 3               | -1.0952381      | -2.1            | 3.6666667       |
| Q04760     | -1.1818182      | -4              | -1.63           | 2.71428571      | 2.2             | -1.375          | 2.75            | T ONLY          | -1.0588235      | 1.14285714      |
| Q04837     | -3              | 1.3333333       | -2.00           | 1               | 2               | -2              | -2              | T ONLY          | -4.5            | N ONLY          |
| Q04917     | -1.8            | -1.4054054      | 1.10            | 1.13793103      | 2.40909091      | -2.3181818      | 1.06818182      | 1.2             | -3              | -3.4            |
| Q05086     | ABSENT          | N ONLY          | ABSENT          | N ONLY          | ABSENT          | ABSENT          | N ONLY          | ABSENT          | T ONLY          | ABSENT          |
| Q05193     | -5.3333333      | -10             | -17.50          | -18             | -1.5            | -55             | -1.7777778      | -18             | -44             | -7.1666667      |
| Q05329     | ABSENT          | ABSENT          | N ONLY          | ABSENT          | ABSENT          | N ONLY          | N ONLY          | ABSENT          | N ONLY          | N ONLY          |
| Q05586     | ABSENT          | ABSENT          | ABSENT          | ABSENT          | ABSENT          | T ONLY          | ABSENT          | ABSENT          | N ONLY          | ABSENT          |
| Q05639     | 1.31034483      | 1.61904762      | 1.69            | 7.7777778       | 1.81481481      | 1.33870968      | 1.7666667       | 1.3             | -1.1443299      | 1.07246377      |
| Q05682     | ABSENT          | ABSENT          | ABSENT          | T ONLY          | 2               | T ONLY          | ABSENT          | T ONLY          | ABSENT          | ABSENT          |
| Q05707     | ABSENT          | ABSENT          | ABSENT          | ABSENT          | T ONLY          | ABSENT          | ABSENT          | ABSENT          | T ONLY          | T ONLY          |
| Q06124     | ABSENT          | T ONLY          | 1.00            | T ONLY          | N ONLY          | 1               | -2              | N ONLY          | N ONLY          | N ONLY          |
| Q06203     | ABSENT          | T ONLY          | ABSENT          | ABSENT          |
| Q06323     | 5               | -1.3333333      | N ONLY          | 3               | T ONLY          | T ONLY          | T ONLY          | ABSENT          | T ONLY          | N ONLY          |
| Q06830     | -3.3636364      | -1.2352941      | 5.80            | 2.44186047      | 1.69387755      | 1               | 2.79487179      | 1.2             | 1.52380952      | 1.3             |
| Q07020     | 1.84615385      | -1.75           | 1.00            | T ONLY          | 5               | -1.4            | 1.25            | T ONLY          | -2.25           | 1.5             |
| Q07065     | ABSENT          | T ONLY          | ABSENT          | T ONLY          | ABSENT          | 3               | T ONLY          | ABSENT          | ABSENT          | T ONLY          |
| Q07157     | ABSENT          | ABSENT          | ABSENT          | ABSENT          | ABSENT          | T ONLY          | ABSENT          | N ONLY          | ABSENT          | ABSENT          |
| Q07812     | 6               | N ONLY          | ABSENT          | T ONLY          | T ONLY          | 6               | 3               | 1               | 2.6666667       | ABSENT          |
| Q07866     | ABSENT          | N ONLY          | N ONLY          | ABSENT          | ABSENT          | ABSENT          | T ONLY          | ABSENT          | N ONLY          | ABSENT          |
| Q07954     | 5               | T ONLY          | ABSENT          | T ONLY          | ABSENT          | ABSENT          | 1               | T ONLY          | T ONLY          | N ONLY          |
| Q07955     | -1.875          | 11              | ABSENT          | 9               | 2.6666667       | 3               | 2.5             | 6.3333333       | -2.25           | 1.3333333       |

| Protein ID | FC 104T/104N | FC 105T/105N | FC 106T/106N | FC 111T/111N | FC 112T/112N | FC 121T/121N | FC 347T/347N | FC 353T/353N | FC 563T/563N | FC 537T/537N |
|------------|--------------|--------------|--------------|--------------|--------------|--------------|--------------|--------------|--------------|--------------|
| Q07960     | 1.5          | ABSENT       | ABSENT       | 3            | T ONLY       | 1            | ABSENT       | N ONLY       | N ONLY       | N ONLY       |
| Q08043     | T ONLY       | N ONLY       | N ONLY       | 1            | T ONLY       | ABSENT       | N ONLY       | ABSENT       | T ONLY       | T ONLY       |
| Q08170     | N Only       | T ONLY       | ABSENT       | T ONLY       | ABSENT       | ABSENT       | ABSENT       | T ONLY       | ABSENT       | ABSENT       |
| Q08209     | N Only       | -5           | N ONLY       | N ONLY       | N ONLY       | N ONLY       | -21          | -4           | N ONLY       | -10.75       |
| Q08211     | 1.66666667   | T ONLY       | N ONLY       | T ONLY       | 2.88888889   | T ONLY       |
| Q08257     | 1            | 1            | 3.00         | 1.33333333   | T ONLY       | 1.66666667   | 5            | 2            | -1.5         | N ONLY       |
| Q08379     | ABSENT       | ABSENT       | ABSENT       | T ONLY       | ABSENT       | ABSENT       | ABSENT       | ABSENT       | ABSENT       | ABSENT       |
| Q08495     | ABSENT       | ABSENT       | N ONLY       | ABSENT       | ABSENT       | N ONLY       | ABSENT       | ABSENT       | N ONLY       | N ONLY       |
| Q08722     | N Only       | ABSENT       | N ONLY       | -2           | 1            | N ONLY       | 1            | ABSENT       | N ONLY       | -2.5         |
| Q08945     | ABSENT       | T ONLY       | ABSENT       |
| Q09028     | 1            | T ONLY       | ABSENT       | T ONLY       | ABSENT       | 3            | N ONLY       | T ONLY       | ABSENT       | ABSENT       |
| Q09161     | ABSENT       | ABSENT       | ABSENT       | T ONLY       | ABSENT       | ABSENT       | ABSENT       | T ONLY       | ABSENT       | ABSENT       |
| Q09666     | ABSENT       | N ONLY       | T ONLY       | ABSENT       | T ONLY       | ABSENT       | N ONLY       | ABSENT       | T ONLY       | N ONLY       |
| Q10567     | N Only       | -2           | -7.00        | -2           | 1.5          | -12          | 1            | -1.6666667   | -15          | -8.25        |
| Q12756     | ABSENT       | T ONLY       |
| Q12765     | N Only       | 1.25         | 9.00         | 2.33333333   | 1.25         | -1.6666667   | 1.5          | -1.1428571   | -4           | -2.1666667   |
| Q12840     | -1.5         | -2           | -1.33        | -2           | 1            | -2.5         | 3            | -1.6666667   | -1.0714286   | N ONLY       |
| Q12846     | N Only       | N ONLY       | T ONLY       | N ONLY       | ABSENT       | ABSENT       | ABSENT       | 2            | -1.5         | N ONLY       |
| Q12860     | -2.25        | 1.33333333   | -1.44        | -2.375       | -13          | -3           | -1.83333333  | -4           | -5.33333333  | -2.15        |
| Q12905     | 1            | T ONLY       | N ONLY       | 6            | T ONLY       | 3            | 3            | 7            | N ONLY       | 2            |
| Q12906     | -4           | 5            | N ONLY       | T ONLY       |
| Q12907     | T ONLY       | ABSENT       | ABSENT       | T ONLY       | ABSENT       | ABSENT       | ABSENT       | ABSENT       | T ONLY       | ABSENT       |
| Q12926     | ABSENT       | T ONLY       | ABSENT       | 1            | ABSENT       | N ONLY       | 1            | T ONLY       | N ONLY       | N ONLY       |
| Q12931     | T ONLY       | 1            | N ONLY       | T ONLY       | -3           | 1.5          | T ONLY       | N ONLY       | N ONLY       | N ONLY       |
| Q12955     | -2           | -7           | -6.00        | -4.5         | N ONLY       | N ONLY       | -2.25        | 1            | -21          | N ONLY       |
| Q12959     | N Only       | N ONLY       | -2.00        | ABSENT       | N ONLY       | ABSENT       | N ONLY       | N ONLY       | ABSENT       | 1            |
| Q12979     | T ONLY       | ABSENT       | N ONLY       | N ONLY       | ABSENT       | -3           | T ONLY       | N ONLY       | ABSENT       | N ONLY       |
| Q13011     | 1            | N ONLY       | -2.00        | T ONLY       | T ONLY       | 1            | 1            | 4            | 1            | 2            |
| Q13017     | ABSENT       |
| Q13045     | ABSENT       | ABSENT       | ABSENT       | T ONLY       | ABSENT       | ABSENT       | T ONLY       | ABSENT       | ABSENT       | ABSENT       |
| Q13057     | T ONLY       | ABSENT       | N ONLY       | ABSENT       | ABSENT       | 1            | T ONLY       | T ONLY       | ABSENT       | ABSENT       |
| Q13098     | T ONLY       | ABSENT       | ABSENT       | ABSENT       | ABSENT       | N ONLY       | N ONLY       | ABSENT       | -1.5         | ABSENT       |
| Q13136     | ABSENT       |
| Q13148     | ABSENT       | ABSENT       | ABSENT       | T ONLY       | ABSENT       | T ONLY       | T ONLY       | T ONLY       | N ONLY       | ABSENT       |
| Q13151     | 1            | T ONLY       | ABSENT       | T ONLY       | ABSENT       | 1            | ABSENT       | T ONLY       | ABSENT       | ABSENT       |
| Q13153     | ABSENT       | ABSENT       | N ONLY       | ABSENT       | ABSENT       | N ONLY       |
| Q13155     | T ONLY       | ABSENT       | ABSENT       | ABSENT       | ABSENT       | ABSENT       | T ONLY       | T ONLY       | ABSENT       | ABSENT       |
| Q13162     | -11          | 2.125        | 6.75         | 2.5          | 3.75         | -2           | 5            | 1            | 1.5          | 1.42857143   |
| Q13177     | T ONLY       | T ONLY       | ABSENT       | T ONLY       | ABSENT       | ABSENT       | T ONLY       | ABSENT       | N ONLY       | ABSENT       |
| Q13185     | 1            | ABSENT       | ABSENT       | T ONLY       | ABSENT       | ABSENT       | ABSENT       | ABSENT       | ABSENT       | ABSENT       |
| Q13200     | 1            | 4            | T ONLY       | -2           | 1            | 2            | 3            | 2            | -1.2         | N ONLY       |
| Q13228     | -2           | N ONLY       | T ONLY       | T ONLY       | N ONLY       | 2            | 4            | N ONLY       | T ONLY       | 1.33333333   |
| Q13232     | -1.5         | N ONLY       | N ONLY       | T ONLY       | T ONLY       | T ONLY       | ABSENT       | T ONLY       | 1            | N ONLY       |
| Q13242     | ABSENT       | ABSENT       | ABSENT       | T ONLY       | ABSENT       | ABSENT       | ABSENT       | T ONLY       | T ONLY       | ABSENT       |
| Q13243     | 1            | T ONLY       | ABSENT       | T ONLY       | ABSENT       | ABSENT       | ABSENT       | T ONLY       | ABSENT       | ABSENT       |
| Q13247     | N Only       | T ONLY       | ABSENT       | T ONLY       | ABSENT       | ABSENT       | ABSENT       | T ONLY       | ABSENT       | ABSENT       |
| Q13263     | 1            | T ONLY       | ABSENT       | T ONLY       | ABSENT       | 1            | T ONLY       | T ONLY       | ABSENT       | T ONLY       |
| Q13303     | ABSENT       | ABSENT       | ABSENT       | N ONLY       | N ONLY       | N ONLY       | N ONLY       | ABSENT       | N ONLY       | N ONLY       |
| Q13310     | T ONLY       | T ONLY       | N ONLY       | T ONLY       | 1            | ABSENT       | 2            | 1            | N ONLY       | ABSENT       |
| Q13336     | ABSENT       | ABSENT       | T ONLY       | ABSENT       | ABSENT       | ABSENT       | ABSENT       | ABSENT       | ABSENT       | N ONLY       |
| Q13347     | ABSENT       | T ONLY       | T ONLY       | ABSENT       | ABSENT       | T ONLY       | ABSENT       | T ONLY       | T ONLY       | ABSENT       |
| Q13363     | N Only       | T ONLY       | N ONLY       | 5            | ABSENT       | N ONLY       | -3           | N ONLY       | N ONLY       | N ONLY       |
| Q13367     | N Only       | ABSENT       | N ONLY       | 1            | ABSENT       | N ONLY       | -2           | ABSENT       | N ONLY       | N ONLY       |
| Q13404     | -1.2         | -3.5         | 1.00         | 2            | -1.33333333  | -3           | 1.66666667   | 4            | -2.25        | -7           |
| Q13409     | 1            | 1            | ABSENT       | T ONLY       | 3            | T ONLY       | ABSENT       | 2            | ABSENT       | N ONLY       |
| Q13423     | -1.5         | -2           | N ONLY       | 6            | -3           | -13          | 1.5          | -2           | -13.875      | -15          |
| Q13435     | T ONLY       | T ONLY       | ABSENT       | ABSENT       |
| Q13442     | 1            | 4            | ABSENT       | T ONLY       | T ONLY       | 4            | T ONLY       | ABSENT       | 1.33333333   | N ONLY       |
| Q13449     | -4           | -2           | -2.00        | T ONLY       | T ONLY       | -7           | 1            | 1            | N ONLY       | -9           |
| Q13451     | ABSENT       | T ONLY       | T ONLY       | T ONLY       | ABSENT       | ABSENT       | ABSENT       | ABSENT       | ABSENT       | ABSENT       |
| Q13464     | ABSENT       | ABSENT       | ABSENT       | ABSENT       | ABSENT       | N ONLY       | ABSENT       | ABSENT       | ABSENT       | ABSENT       |
| Q13492     | -4           | N ONLY       | N ONLY       | N ONLY       | -3           | N ONLY       | -3.6666667   | N ONLY       | N ONLY       | N ONLY       |

| Protein ID | FC<br>104T/104N | FC<br>105T/105N | FC<br>106T/106N | FC<br>111T/111N | FC<br>112T/112N | FC<br>121T/121N | FC<br>347T/347N | FC<br>353T/353N | FC<br>563T/563N | FC<br>537T/537N |
|------------|-----------------|-----------------|-----------------|-----------------|-----------------|-----------------|-----------------|-----------------|-----------------|-----------------|
| Q13509     | -2.0661157      | -1.3314607      | -1.10           | -1.2312925      | -1.9424084      | -3.4864865      | 1.03672316      | -2.5            | -3.9            | -3.3960396      |
| Q13510     | -5              | T ONLY          | T ONLY          | T ONLY          | T ONLY          | 6               | T ONLY          | 1.5             | 2               | ABSENT          |
| Q13554     | N Only          | -4              | -13.33          | -8.5            | N ONLY          | N ONLY          | -6.1666667      | 2               | -97.5           | -21.5           |
| Q13555     | N Only          | -3.5            | -6.33           | -5              | N ONLY          | N ONLY          | -4.2            | 2               | -29.25          | -13             |
| Q13557     | N Only          | -6              | -10.00          | -5.25           | N ONLY          | N ONLY          | -15             | 1.5             | -85.5           | N ONLY          |
| Q13561     | ABSENT          | ABSENT          | ABSENT          | -2              | T ONLY          | N ONLY          | ABSENT          | N ONLY          | N ONLY          | N ONLY          |
| Q13576     | -1.2            | T ONLY          | ABSENT          | T ONLY          | ABSENT          | T ONLY          | ABSENT          | T ONLY          | T ONLY          | ABSENT          |
| Q13596     | N Only          | T ONLY          | -2.00           | 1.5             | N ONLY          | 1               | T ONLY          | -6              | N ONLY          | N ONLY          |
| Q13617     | ABSENT          | ABSENT          | ABSENT          | ABSENT          | ABSENT          | N ONLY          | ABSENT          | T ONLY          | ABSENT          | N ONLY          |
| Q13618     | 1.33333333      | -5              | N ONLY          | 4               | ABSENT          | N ONLY          | 1.5             | T ONLY          | N ONLY          | N ONLY          |
| Q13620     | ABSENT          | T ONLY          | ABSENT          | T ONLY          | ABSENT          | ABSENT          | ABSENT          | ABSENT          | ABSENT          | ABSENT          |
| Q13630     | 1               | T ONLY          | ABSENT          | T ONLY          | T ONLY          | T ONLY          | ABSENT          | T ONLY          | ABSENT          | N ONLY          |
| Q13636     | 3               | N ONLY          | T ONLY          | 4               | T ONLY          | ABSENT          | T ONLY          | ABSENT          | N ONLY          | N ONLY          |
| Q13642     | 1.28571429      | 1.16666667      | 12.00           | 1.5             | 1.5             | 20              | 2               | 7.5             | T ONLY          | 2               |
| Q13740     | N Only          | -1.5            | -1.50           | -1.3333333      | ABSENT          | N ONLY          | T ONLY          | 1               | -4.5            | N ONLY          |
| Q13765     | 4.33333333      | T ONLY          | 2.00            | 9               | T ONLY          | 1.5             | 3               | T ONLY          | -1.5            | N ONLY          |
| Q13813     | -1.7413793      | -2.0740741      | 1.56            | -1.744186       | -1.1626016      | -2.9816514      | 1.35326087      | -1.2931034      | -1.9653285      | -2.130597       |
| Q13825     | ABSENT          | N ONLY          | ABSENT          | N ONLY          | T ONLY          | ABSENT          | T ONLY          | ABSENT          | N ONLY          | N ONLY          |
| Q13838     | 1.5             | T ONLY          | ABSENT          | T ONLY          | T ONLY          | T ONLY          | N ONLY          | T ONLY          | N ONLY          | ABSENT          |
| Q13867     | T ONLY          | ABSENT          | N ONLY          | T ONLY          | T ONLY          | T ONLY          | ABSENT          | N ONLY          | ABSENT          | ABSENT          |
| Q13885     | -1.6388889      | -1.4109589      | -1.31           | -1.1571816      | -1.9864253      | -3.686747       | 1.05741627      | -2.3913043      | -3.6677116      | -2.4853801      |
| Q13938     | N Only          | -3              | T ONLY          |
| Q14008     | N Only          | ABSENT          | N ONLY          | T ONLY          | N ONLY          | 2               | 5               | N ONLY          | -1.5            | N ONLY          |
| Q14011     | 2               | T ONLY          | ABSENT          | T ONLY          | ABSENT          | 4               | N ONLY          | T ONLY          | ABSENT          | 4               |
| Q14019     | ABSENT          | N ONLY          | T ONLY          | T ONLY          | N ONLY          | ABSENT          | T ONLY          | T ONLY          | T ONLY          | ABSENT          |
| Q14103     | 2.16666667      | 9               | -2.00           | 31              | T ONLY          | 5               | 2.33333333      | 4               | -3.75           | 1.33333333      |
| Q14108     | -2              | 1               | ABSENT          | 3               | T ONLY          | T ONLY          | T ONLY          | 1               | N ONLY          | N ONLY          |
| Q14112     | T ONLY          | ABSENT          | ABSENT          | T ONLY          | ABSENT          | ABSENT          | ABSENT          | T ONLY          | T ONLY          | ABSENT          |
| Q14123     | ABSENT          | N ONLY          | ABSENT          | ABSENT          |
| Q14139     | T ONLY          | T ONLY          | ABSENT          | ABSENT          | ABSENT          | T ONLY          | ABSENT          | T ONLY          | T ONLY          | ABSENT          |
| Q14141     | -2              | 1.5             | N ONLY          | 1               | 4               | -4.3333333      | 3               | 1               | N ONLY          | -1.5            |
| Q14151     | ABSENT          | ABSENT          | ABSENT          | T ONLY          | ABSENT          | ABSENT          | ABSENT          | T ONLY          | ABSENT          | ABSENT          |
| Q14152     | T ONLY          | 5               | ABSENT          | T ONLY          | ABSENT          | ABSENT          | ABSENT          | T ONLY          | ABSENT          | T ONLY          |
| Q14160     | ABSENT          | T ONLY          | ABSENT          | T ONLY          | ABSENT          | T ONLY          | ABSENT          | ABSENT          | ABSENT          | ABSENT          |
| Q14165     | 1               | ABSENT          | ABSENT          | ABSENT          | ABSENT          | ABSENT          | ABSENT          | T ONLY          | ABSENT          | ABSENT          |
| Q14166     | ABSENT          | T ONLY          | ABSENT          | T ONLY          | T ONLY          | T ONLY          | T ONLY          | ABSENT          | ABSENT          | T ONLY          |
| Q14168     | ABSENT          | ABSENT          | 1.00            | ABSENT          | ABSENT          | N ONLY          | -2              | T ONLY          | N ONLY          | ABSENT          |
| Q14185     | N Only          | ABSENT          | ABSENT          | ABSENT          | ABSENT          | ABSENT          | T ONLY          | ABSENT          | ABSENT          | ABSENT          |
| Q14194     | -3              | 2.1             | -2.70           | 1.16666667      | -1.7272727      | -9              | 1.375           | -2.3571429      | -11.571429      | -2.6875         |
| Q14195     | -1.8666667      | 1.46153846      | 3.31            | 3.875           | 1               | 2.92307692      | 6.8             | 1.81818182      | 1.96491228      | 1.25            |
| Q14203     | -1.1666667      | -4              | 2.00            | -1.8            | -2.3333333      | -1.5            | 2.25            | -2              | -1.5            | -12.5           |
| Q14204     | 1.34375         | -18.4           | -4.17           | -1.2857143      | -2.9411765      | -5.6666667      | 2.61764706      | -2              | 1               | -6.25           |
| Q14232     | ABSENT          | ABSENT          | ABSENT          | ABSENT          | ABSENT          | T ONLY          | ABSENT          | T ONLY          | ABSENT          | ABSENT          |
| Q14240     | 1.25            | T ONLY          | N ONLY          | 3               | 3               | -4              | 1.66666667      | 2               | -8.25           | -1.5            |
| Q14247     | T ONLY          | N ONLY          | ABSENT          | ABSENT          | ABSENT          | ABSENT          | N ONLY          | ABSENT          | ABSENT          | N ONLY          |
| Q14254     | ABSENT          | ABSENT          | N ONLY          | T ONLY          | T ONLY          | -2              | N ONLY          | -1.5            | N ONLY          | N ONLY          |
| Q14289     | ABSENT          | ABSENT          | ABSENT          | N ONLY          | ABSENT          | ABSENT          | ABSENT          | ABSENT          | ABSENT          | N ONLY          |
| Q14315     | T ONLY          | 1.26666667      | T ONLY          |
| Q14344     | -4              | 1.75            | T ONLY          | 1.5             | -1.5            | T ONLY          | 1               | 2               | 2               | N ONLY          |
| Q14444     | N Only          | T ONLY          | N ONLY          | T ONLY          | ABSENT          | T ONLY          | ABSENT          | T ONLY          | N ONLY          | N ONLY          |
| Q14515     | T ONLY          | ABSENT          | T ONLY          | ABSENT          |
| Q14525     | N Only          | N ONLY          | -9.00           | -9              | N ONLY          | ABSENT          | N ONLY          | ABSENT          | -4.5            | T ONLY          |
| Q14532     | N Only          | N ONLY          | -9.00           | -9              | N ONLY          | ABSENT          | N ONLY          | ABSENT          | -4.5            | T ONLY          |
| Q14566     | ABSENT          | ABSENT          | ABSENT          | T ONLY          | ABSENT          | ABSENT          | ABSENT          | ABSENT          | ABSENT          | ABSENT          |
| Q14576     | ABSENT          | T ONLY          | ABSENT          | T ONLY          | ABSENT          | -1.5            | T ONLY          | 2               | N ONLY          | N ONLY          |
| Q14624     | T ONLY          | ABSENT          | ABSENT          | ABSENT          | T ONLY          | ABSENT          |
| Q14643     | ABSENT          | N ONLY          | ABSENT          |
| Q14676     | ABSENT          | N ONLY          | ABSENT          | ABSENT          |
| Q14683     | T ONLY          | T ONLY          | ABSENT          | T ONLY          | ABSENT          | T ONLY          | ABSENT          | 4               | T ONLY          | ABSENT          |
| Q14694     | N Only          | ABSENT          | ABSENT          | T ONLY          | ABSENT          | ABSENT          | ABSENT          | ABSENT          | ABSENT          | ABSENT          |
| Q14696     | N Only          | 2               | ABSENT          | 3               | ABSENT          | T ONLY          | N ONLY          | ABSENT          | 2               | N ONLY          |
| Q14697     | 1               | -2              | ABSENT          | 2.33333333      | 3               | T ONLY          | T ONLY          | ABSENT          | 2.66666667      | 1               |



| Protein ID | FC<br>104T/104N | FC<br>105T/105N | FC<br>106T/106N | FC<br>111T/111N | FC<br>112T/112N | FC<br>121T/121N | FC<br>347T/347N | FC<br>353T/353N | FC<br>563T/563N | FC<br>537T/537N |
|------------|-----------------|-----------------|-----------------|-----------------|-----------------|-----------------|-----------------|-----------------|-----------------|-----------------|
| Q14699     | ABSENT          | N ONLY          |
| Q14764     | 3               | ABSENT          | T ONLY          | T ONLY          | T ONLY          | ABSENT          | T ONLY          | ABSENT          | T ONLY          | N ONLY          |
| Q14832     | ABSENT          | ABSENT          | N ONLY          | ABSENT          | ABSENT          | ABSENT          | ABSENT          | ABSENT          | N ONLY          | N ONLY          |
| Q14839     | ABSENT          | ABSENT          | ABSENT          | T ONLY          | ABSENT          | ABSENT          | ABSENT          | ABSENT          | ABSENT          | ABSENT          |
| Q14847     | -2              | 2               | 5.00            | N ONLY          | ABSENT          | -8              | N ONLY          | 2.5             | -8.25           | 2               |
| Q14894     | -2              | ABSENT          | -12.00          | N ONLY          | N ONLY          | N ONLY          | 2               | N ONLY          | N ONLY          | -1.45           |
| Q14914     | ABSENT          | 2               | ABSENT          | ABSENT          | ABSENT          | T ONLY          | T ONLY          | T ONLY          | T ONLY          | 2               |
| Q14974     | -1.25           | 1.4             | -1.14           | 3               | 1.5             | 6               | 1               | 2               | 1.11111111      | 1.5             |
| Q14978     | ABSENT          |
| Q14980     | 8               | T ONLY          | ABSENT          | T ONLY          | T ONLY          | T ONLY          | T ONLY          | -2              | T ONLY          | ABSENT          |
| Q14982     | ABSENT          | T ONLY          | N ONLY          | 1               | ABSENT          | N ONLY          | N ONLY          | -2              | N ONLY          | N ONLY          |
| Q14BN4     | ABSENT          |
| Q14C28     | ABSENT          | ABSENT          | T ONLY          | ABSENT          |
| Q15005     | T ONLY          | ABSENT          | ABSENT          | T ONLY          | ABSENT          | ABSENT          | ABSENT          | ABSENT          | T ONLY          | ABSENT          |
| Q15006     | T ONLY          | T ONLY          | ABSENT          | ABSENT          | ABSENT          | T ONLY          | T ONLY          | T ONLY          | N ONLY          | ABSENT          |
| Q15008     | ABSENT          | ABSENT          | ABSENT          | ABSENT          | ABSENT          | N ONLY          | N ONLY          | T ONLY          | ABSENT          | ABSENT          |
| Q15019     | N Only          | 1               | ABSENT          | T ONLY          | 1               | 1               | T ONLY          | 2               | 1.33333333      | N ONLY          |
| Q15020     | ABSENT          | T ONLY          | ABSENT          | T ONLY          | ABSENT          | ABSENT          | ABSENT          | ABSENT          | ABSENT          | ABSENT          |
| Q15029     | T ONLY          | T ONLY          | ABSENT          | T ONLY          | ABSENT          | ABSENT          |
| Q15031     | ABSENT          | T ONLY          | ABSENT          | ABSENT          | ABSENT          | ABSENT          | ABSENT          | T ONLY          | ABSENT          | ABSENT          |
| Q15046     | ABSENT          |
| Q15056     | N Only          | 1               | 1.00            | -3              | 1               | ABSENT          | T ONLY          | N ONLY          | -2.25           | ABSENT          |
| Q15075     | 8               | T ONLY          | N ONLY          | 2.5             | T ONLY          | 1.33333333      | 3               | T ONLY          | 3.33333333      | -3              |
| Q15084     | 1               | 2.5             | N ONLY          | 8               | T ONLY          | 1.33333333      | 1               | 6               | -2.25           | T ONLY          |
| Q15102     | N Only          | -1.5            | 1.50            | 5               | T ONLY          | ABSENT          | 2               | 1               | -1.5            | -1.5            |
| Q15121     | 1.3             | 2.33333333      | 2.25            | 2.5             | 1.55555556      | 2.75            | 1               | 9.5             | -1.1470588      | -7.5            |
| Q15126     | -1.2857143      | 1.33333333      | 7.00            | 2               | N ONLY          | 6               | T ONLY          | -2              | T ONLY          | 2               |
| Q15149     | 1.33636364      | -5              | 6.76            | 4.09375         | 2.58333333      | 4.48275862      | 16              | 3.22727273      | 10.3703704      | 2.11594203      |
| Q15181     | 1.5             | 2               | N ONLY          | T ONLY          | T ONLY          | ABSENT          | N ONLY          | T ONLY          | N ONLY          | ABSENT          |
| Q15185     | 1               | -1.5            | ABSENT          | 2               | T ONLY          | 1               | T ONLY          | T ONLY          | 1               | ABSENT          |
| Q15223     | ABSENT          | ABSENT          | ABSENT          | N ONLY          | ABSENT          | ABSENT          | ABSENT          | ABSENT          | N ONLY          | N ONLY          |
| Q15233     | 3               | 7               | N ONLY          | T ONLY          | T ONLY          | T ONLY          | T ONLY          | 2.5             | -3              | 6               |
| Q15257     | 1.33333333      | 1.66666667      | 2.00            | -2              | 1               | -4              | 2               | 2               | -3.5            | -1.75           |
| Q15274     | ABSENT          | T ONLY          | ABSENT          |
| Q15286     | -3              | N ONLY          | ABSENT          | T ONLY          | N ONLY          | N ONLY          | N ONLY          | 2               | -7.5            | N ONLY          |
| Q15334     | 2               | T ONLY          | 2.00            | ABSENT          | N ONLY          | ABSENT          | T ONLY          | -1.25           | T ONLY          | -2              |
| Q15363     | 1               | N ONLY          | N ONLY          | T ONLY          | T ONLY          | 1.5             | 1               | T ONLY          | T ONLY          | ABSENT          |
| Q15365     | 1               | 2.5             | -1.50           | 1               | -1.5            | 1.33333333      | 2               | 1               | -3.375          | -1.5            |
| Q15366     | 1.4             | 1.5             | -1.50           | 7               | 1.5             | 1.75            | 1.2             | 6               | -5.625          | -1.3333333      |
| Q15370     | 1               | N ONLY          | N ONLY          | 1.5             | 1               | -1.5            | -1.5            | T ONLY          | N ONLY          | N ONLY          |
| Q15382     | N Only          | ABSENT          | ABSENT          | ABSENT          | T ONLY          | 1               | ABSENT          | T ONLY          | ABSENT          | N ONLY          |
| Q15393     | T ONLY          | T ONLY          | ABSENT          | ABSENT          |
| Q15404     | N Only          | ABSENT          | ABSENT          | ABSENT          | T ONLY          | ABSENT          | T ONLY          | ABSENT          | ABSENT          | ABSENT          |
| Q15417     | 2               | 2.5             | T ONLY          | T ONLY          | T ONLY          | T ONLY          | ABSENT          | T ONLY          | 1.66666667      | 3.33333333      |
| Q15424     | ABSENT          | ABSENT          | ABSENT          | T ONLY          | ABSENT          | ABSENT          | ABSENT          | ABSENT          | ABSENT          | ABSENT          |
| Q15435     | ABSENT          | T ONLY          | N ONLY          | 2               | 1               | -3              | -2              | 3               | -6              | N ONLY          |
| Q15436     | N Only          | 2               | ABSENT          | T ONLY          | T ONLY          | 1               | ABSENT          | T ONLY          | T ONLY          | N ONLY          |
| Q15437     | ABSENT          | ABSENT          | ABSENT          | T ONLY          | ABSENT          | ABSENT          | ABSENT          | T ONLY          | ABSENT          | ABSENT          |
| Q15459     | T ONLY          | T ONLY          | ABSENT          | T ONLY          | ABSENT          | ABSENT          | ABSENT          | ABSENT          | ABSENT          | ABSENT          |
| Q15493     | N Only          | 1               | ABSENT          | ABSENT          | T ONLY          | T ONLY          | ABSENT          | T ONLY          | ABSENT          | ABSENT          |
| Q15555     | N Only          | ABSENT          | -6              | N ONLY          |
| Q15582     | ABSENT          | ABSENT          | ABSENT          | ABSENT          | T ONLY          | ABSENT          | ABSENT          | T ONLY          | T ONLY          | ABSENT          |
| Q15631     | 1.33333333      | 1               | -1.50           | 3               | 2               | T ONLY          | T ONLY          | T ONLY          | 3               | 1               |
| Q15691     | -1.5            | -2              | 1.00            | 3               | -3              | 2               | -1.5            | 3.5             | -2              | 1.33333333      |
| Q15714     | ABSENT          | ABSENT          | N ONLY          | ABSENT          | N ONLY          | N ONLY          | N ONLY          | ABSENT          | ABSENT          | N ONLY          |
| Q15717     | 4               | T ONLY          | 1.00            | T ONLY          | ABSENT          | 2               | T ONLY          | 4               | 1.33333333      | N ONLY          |
| Q15738     | T ONLY          | ABSENT          | ABSENT          | ABSENT          | T ONLY          | ABSENT          | ABSENT          | ABSENT          | ABSENT          | ABSENT          |
| Q15746     | ABSENT          | ABSENT          | T ONLY          | ABSENT          | ABSENT          | ABSENT          | ABSENT          | ABSENT          | T ONLY          | 6               |
| Q15773     | ABSENT          | ABSENT          | ABSENT          | N ONLY          |
| Q15811     | ABSENT          | ABSENT          | ABSENT          | ABSENT          | ABSENT          | ABSENT          | 1               | ABSENT          | ABSENT          | ABSENT          |
| Q15818     | ABSENT          | ABSENT          | N ONLY          | ABSENT          | ABSENT          | ABSENT          | ABSENT          | ABSENT          | ABSENT          | N ONLY          |
| Q15819     | -1.5            | -3.5            | -1.14           | 2.25            | 1.33333333      | -3.3333333      | 1.66666667      | 2.33333333      | -5.1            | -10             |

| Protein ID | FC<br>104T/104N | FC<br>105T/105N | FC<br>106T/106N | FC<br>111T/111N | FC<br>112T/112N | FC<br>121T/121N | FC<br>347T/347N | FC<br>353T/353N | FC<br>563T/563N | FC<br>537T/537N |
|------------|-----------------|-----------------|-----------------|-----------------|-----------------|-----------------|-----------------|-----------------|-----------------|-----------------|
| Q15907     | -1.8571429      | 1.125           | T ONLY          | 1.6             | 1.125           | 1.71428571      | 1.125           | 5               | 1.48148148      | -2.25           |
| Q15942     | N Only          | ABSENT          | ABSENT          | T ONLY          | N ONLY          |
| Q16134     | ABSENT          | N ONLY          | ABSENT          | T ONLY          | ABSENT          | ABSENT          | ABSENT          | ABSENT          | N ONLY          | ABSENT          |
| Q16143     | -7              | -6              | -25.00          | N ONLY          | 1.33333333      | -26             | -1.8571429      | N ONLY          | -6              | -3.25           |
| Q16181     | 1               | -1.5714286      | -2.00           | 1               | -1.5            | -3              | 1               | -1.4444444      | -6.9            | N ONLY          |
| Q16352     | -18.666667      | -14.333333      | 1.36            | -10.125         | 1.1875          | -5.2            | 2.97142857      | -103            | -6.25           | -1.5714286      |
| Q16363     | ABSENT          | ABSENT          | ABSENT          | ABSENT          | T ONLY          | ABSENT          | ABSENT          | T ONLY          | ABSENT          | ABSENT          |
| Q16527     | N Only          | ABSENT          | T ONLY          | T ONLY          | T ONLY          | ABSENT          | ABSENT          | ABSENT          | ABSENT          | T ONLY          |
| Q16531     | ABSENT          | T ONLY          | T ONLY          | N ONLY          |
| Q16543     | T ONLY          | T ONLY          | N ONLY          | 2               | N ONLY          | T ONLY          | ABSENT          | 1               | N ONLY          | ABSENT          |
| Q16555     | -5.4285714      | -1.1481481      | -1.64           | -1.2018349      | -1.9772727      | -4.025          | -1.0104167      | -2.8301887      | -3.3040541      | -2.5510204      |
| Q16576     | 1               | T ONLY          | ABSENT          | T ONLY          | ABSENT          | 2               | N ONLY          | T ONLY          | ABSENT          | ABSENT          |
| Q16623     | ABSENT          | N ONLY          | -7              |
| Q16629     | 1               | T ONLY          | ABSENT          | T ONLY          | T ONLY          | 2               | T ONLY          | T ONLY          | -6              | 2               |
| Q16630     | ABSENT          | T ONLY          | ABSENT          | T ONLY          | ABSENT          | ABSENT          | ABSENT          | ABSENT          | ABSENT          | ABSENT          |
| Q16653     | -1.625          | N ONLY          | -2.71           | -16.25          | -4.3809524      | -3.5            | -1.952381       | N ONLY          | -6.75           | -1.3064516      |
| Q16658     | 1               | 1.33333333      | T ONLY          | -1.1666667      | 1.6             | -9              | -2.6666667      | -3.3333333      | N ONLY          | -2.75           |
| Q16698     | -1.7142857      | -1.1428571      | -1.67           | -2              | 1.25            | 1.875           | 1.2             | 1.5             | -3              | -4              |
| Q16718     | -1.5            | -2.5            | -4.33           | -1.25           | 1.33333333      | -11             | -2.2            | 1               | -27             | -11.5           |
| Q16720     | 1.6666667       | 2               | -3.67           | 1               | N ONLY          | -2.1111111      | -5              | 3               | -9              | N ONLY          |
| Q16762     | N Only          | N ONLY          | 1.00            | -2              | ABSENT          | 1               | T ONLY          | 1               | ABSENT          | ABSENT          |
| Q16774     | 1.33333333      | -1.5            | 3.00            | 2               | -1.5            | -1.25           | T ONLY          | 1               | -1.2            | N ONLY          |
| Q16775     | 1               | N ONLY          | -2.00           | 1               | T ONLY          | 1               | 1               | 2               | N ONLY          | -2.5            |
| Q16795     | -5              | N ONLY          | N ONLY          | -2.3333333      | N ONLY          | N ONLY          | -2              | 1               | N ONLY          | -4.25           |
| Q16798     | ABSENT          | ABSENT          | N ONLY          | ABSENT          | ABSENT          | N ONLY          | T ONLY          | ABSENT          | N ONLY          | N ONLY          |
| Q16799     | ABSENT          | ABSENT          | N ONLY          | -2              | -2              | N ONLY          | -2.6666667      | -2              | -9.75           | N ONLY          |
| Q16822     | ABSENT          | T ONLY          | ABSENT          |
| Q16836     | 4               | 3.33333333      | 6.00            | T ONLY          | T ONLY          | 3               | T ONLY          | 1.2             | -4.5            | T ONLY          |
| Q16850     | ABSENT          |
| Q16851     | 1               | 1               | ABSENT          | 4               | T ONLY          | N ONLY          | 4               | -3              | -3              | N ONLY          |
| Q16853     | ABSENT          | T ONLY          |
| Q16864     | 2               | N ONLY          | -3.00           | T ONLY          | 1               | N ONLY          | N ONLY          | ABSENT          | N ONLY          | N ONLY          |
| Q16875     | N Only          | ABSENT          | ABSENT          | ABSENT          | ABSENT          | T ONLY          | ABSENT          | ABSENT          | N ONLY          | ABSENT          |
| Q16881     | T ONLY          | 1               | T ONLY          | T ONLY          | ABSENT          | 2               | N ONLY          | T ONLY          | ABSENT          | T ONLY          |
| Q16891     | -12             | 1.09090909      | -2.67           | -1.2857143      | 6               | -3.4            | 1.85714286      | 4.33333333      | -9.75           | -2.5            |
| Q1KMD3     | -1.5            | T ONLY          | ABSENT          | T ONLY          | ABSENT          | T ONLY          | T ONLY          | T ONLY          | ABSENT          | 4               |
| Q27J81     | ABSENT          | N ONLY          | ABSENT          | ABSENT          |
| Q2M2I5     | -4.75           | -28             | -8.00           | -1.1428571      | -1.6842105      | -1.2222222      | -1.5            | -1.6            | -6              | 4               |
| Q2M389     | ABSENT          | ABSENT          | ABSENT          | T ONLY          | ABSENT          | ABSENT          | ABSENT          | ABSENT          | T ONLY          | ABSENT          |
| Q2TB90     | -4              | -5              | -2.50           | N ONLY          | 2               | -8              | -2              | -2              | -10.5           | -2.5            |
| Q2VIR3     | ABSENT          | ABSENT          | ABSENT          | T ONLY          | ABSENT          | ABSENT          | ABSENT          | ABSENT          | ABSENT          | ABSENT          |
| Q32P28     | ABSENT          |
| Q32P51     | 1.69230769      | 3.25            | N ONLY          | 6.4             | 1.75            | 5               | 2               | T ONLY          | -9              | -1.5            |
| Q3LXA3     | ABSENT          | 2               | T ONLY          | ABSENT          | ABSENT          | ABSENT          | T ONLY          | ABSENT          | ABSENT          | N ONLY          |
| Q3SXM5     | ABSENT          | ABSENT          | ABSENT          | ABSENT          | ABSENT          | T ONLY          | ABSENT          | T ONLY          | N ONLY          | ABSENT          |
| Q3SY69     | ABSENT          | T ONLY          | T ONLY          | ABSENT          | ABSENT          | T ONLY          | T ONLY          | ABSENT          | ABSENT          | N ONLY          |
| Q3SY84     | -2.1            | -8.8333333      | -6.25           | -2.6            | -5.4            | -1.125          | 2.25            | 1.25            | 1.55555556      | 1.6             |
| Q3V6T2     | T ONLY          | ABSENT          |
| Q496J9     | ABSENT          | N ONLY          | N ONLY          | N ONLY          | ABSENT          | ABSENT          | N ONLY          | ABSENT          | ABSENT          | N ONLY          |
| Q4G0N4     | T ONLY          | 4               | 1.00            | N ONLY          | N ONLY          | T ONLY          | T ONLY          | 2               | T ONLY          | ABSENT          |
| Q53FA7     | -3              | T ONLY          | T ONLY          | ABSENT          | ABSENT          | T ONLY          | ABSENT          | ABSENT          | N ONLY          | ABSENT          |
| Q53GQ0     | N Only          | T ONLY          | N ONLY          | T ONLY          | -2              | 1               | ABSENT          | N ONLY          | ABSENT          | T ONLY          |
| Q53H12     | ABSENT          | ABSENT          | ABSENT          | ABSENT          | ABSENT          | N ONLY          | T ONLY          | ABSENT          | N ONLY          | ABSENT          |
| Q53H96     | ABSENT          | T ONLY          | ABSENT          | ABSENT          | ABSENT          | T ONLY          | ABSENT          | T ONLY          | ABSENT          | ABSENT          |
| Q58FF3     | -1.5            | 1               | T ONLY          | 2               | T ONLY          | 1.5             | 1               | 4               | T ONLY          | N ONLY          |
| Q58FF6     | -2.8            | -1.3333333      | -1.11           | 1.5             | -1.5714286      | -1.8            | 2               | 1.4             | -1.6875         | -1.8333333      |
| Q58FF7     | -1.4375         | 1.42857143      | -1.58           | 3.13333333      | 1.25            | 1.29411765      | 2               | 2.09090909      | -3.6315789      | -2.9            |
| Q58FF8     | 1.125           | 2.31818182      | 2.36            | 3.03846154      | 1.26315789      | -1.122449       | 1.64            | 1.33333333      | -1.78           | -1.5833333      |
| Q5H9L2     | N Only          | 3               | ABSENT          | T ONLY          | ABSENT          | 1               | 2               | T ONLY          | N ONLY          | N ONLY          |
| Q5HYK3     | ABSENT          |
| Q5JRX3     | ABSENT          | ABSENT          | N ONLY          | ABSENT          |
| Q5JSH3     | ABSENT          | 1               | ABSENT          | ABSENT          |





| Protein ID | FC<br>104T/104N | FC<br>105T/105N | FC<br>106T/106N | FC<br>111T/111N | FC<br>112T/112N | FC<br>121T/121N | FC<br>347T/347N | FC<br>353T/353N | FC<br>563T/563N | FC<br>537T/537N |
|------------|-----------------|-----------------|-----------------|-----------------|-----------------|-----------------|-----------------|-----------------|-----------------|-----------------|
| Q8N6C5     | N Only          | ABSENT          | T ONLY          | ABSENT          | ABSENT          | ABSENT          | T ONLY          | ABSENT          | ABSENT          | ABSENT          |
| Q8N6T3     | N Only          | ABSENT          | ABSENT          | ABSENT          | T ONLY          | 1               | N ONLY          | ABSENT          | N ONLY          | N ONLY          |
| Q8N7J2     | ABSENT          | ABSENT          | N ONLY          | ABSENT          | N ONLY          | N ONLY          | N ONLY          | -2              | -1.5            | -3.5            |
| Q8N8N7     | ABSENT          | T ONLY          | T ONLY          | ABSENT          | ABSENT          | T ONLY          | T ONLY          | ABSENT          | ABSENT          | ABSENT          |
| Q8N8S7     | T ONLY          | T ONLY          | ABSENT          | ABSENT          | ABSENT          | ABSENT          | ABSENT          | T ONLY          | T ONLY          | ABSENT          |
| Q8N954     | 2               | N ONLY          | T ONLY          | T ONLY          | T ONLY          | 2               | 3               | T ONLY          | T ONLY          | T ONLY          |
| Q8N983     | T ONLY          | ABSENT          | ABSENT          | ABSENT          | ABSENT          | ABSENT          | T ONLY          | ABSENT          | ABSENT          | ABSENT          |
| Q8N9I0     | N Only          | N ONLY          | N ONLY          | N ONLY          | ABSENT          | N ONLY          | -7              | ABSENT          | N ONLY          | N ONLY          |
| Q8N9N7     | 2               | ABSENT          | 1.00            | N ONLY          | ABSENT          | N ONLY          | N ONLY          | ABSENT          | N ONLY          | N ONLY          |
| Q8N9R8     | ABSENT          | ABSENT          | ABSENT          | ABSENT          | ABSENT          | N ONLY          | N ONLY          | ABSENT          | N ONLY          | ABSENT          |
| Q8NBJ7     | ABSENT          |
| Q8NBN7     | ABSENT          | N ONLY          |
| Q8NBQ5     | ABSENT          | T ONLY          | T ONLY          |
| Q8NBS9     | ABSENT          | T ONLY          | ABSENT          | T ONLY          | ABSENT          | ABSENT          | ABSENT          | ABSENT          | ABSENT          | ABSENT          |
| Q8NBX0     | 1               | T ONLY          | N ONLY          | -1.5            | ABSENT          | 2               | 2               | T ONLY          | N ONLY          | N ONLY          |
| Q8NC51     | 7.66666667      | T ONLY          | ABSENT          | T ONLY          | T ONLY          | 1.5             | T ONLY          | 5               | ABSENT          | ABSENT          |
| Q8NC96     | ABSENT          | ABSENT          | ABSENT          | ABSENT          | ABSENT          | N ONLY          | ABSENT          | ABSENT          | N ONLY          | N ONLY          |
| Q8NCB2     | ABSENT          | ABSENT          | N ONLY          | ABSENT          | ABSENT          | N ONLY          | N ONLY          | ABSENT          | N ONLY          | N ONLY          |
| Q8NCN5     | ABSENT          | ABSENT          | T ONLY          | ABSENT          | ABSENT          | ABSENT          | T ONLY          | T ONLY          | ABSENT          | ABSENT          |
| Q8NCW5     | 2               | N ONLY          | 1.00            | 2               | -2              | T ONLY          | 2               | ABSENT          | -2.25           | N ONLY          |
| Q8NF91     | ABSENT          |
| Q8NFI4     | 1.25            | 1.33333333      | -4.00           | 7.5             | 3               | 7               | 5               | 2.66666667      | -1.2            | -1.5            |
| Q8NFZ4     | ABSENT          | -2              | ABSENT          | ABSENT          | ABSENT          | ABSENT          | T ONLY          | ABSENT          | ABSENT          | ABSENT          |
| Q8NFZ8     | N Only          | -3              | -2.00           | 1.33333333      | N ONLY          | ABSENT          | 2               | 1               | -4.5            | 1.33333333      |
| Q8NHG7     | N Only          | N ONLY          | -1.50           | T ONLY          | N ONLY          | N ONLY          | -1.5            | N ONLY          | N ONLY          | -2              |
| Q8NHW5     | 1.4             | 1.14285714      | 4.00            | 2.5             | -1.3333333      | 1.5             | 2               | 2.66666667      | -2.5            | -1.5            |
| Q8TAC9     | N Only          | N ONLY          | N ONLY          | N ONLY          | ABSENT          | N ONLY          | ABSENT          | ABSENT          | N ONLY          | N ONLY          |
| Q8TAM6     | ABSENT          | N ONLY          | ABSENT          | N ONLY          | -2              | ABSENT          | 1               | N ONLY          | N ONLY          | N ONLY          |
| Q8TAQ2     | ABSENT          | ABSENT          | ABSENT          | T ONLY          | ABSENT          | ABSENT          | ABSENT          | ABSENT          | ABSENT          | ABSENT          |
| Q8TB36     | -2              | N ONLY          | N ONLY          | -4              | 1               | -6              | 1               | N ONLY          | -9.75           | -1.8333333      |
| Q8TB96     | ABSENT          | N ONLY          | ABSENT          |
| Q8TBF2     | N Only          | N ONLY          | ABSENT          | ABSENT          | ABSENT          | ABSENT          | N ONLY          | ABSENT          | N ONLY          | N ONLY          |
| Q8TC12     | T ONLY          | N ONLY          | N ONLY          | T ONLY          | ABSENT          | 1               | N ONLY          | T ONLY          | N ONLY          | N ONLY          |
| Q8TCU6     | T ONLY          | ABSENT          | ABSENT          | ABSENT          | ABSENT          | ABSENT          | ABSENT          | T ONLY          | ABSENT          | ABSENT          |
| Q8TD22     | N Only          | ABSENT          | ABSENT          | ABSENT          | ABSENT          | N ONLY          | ABSENT          | ABSENT          | N ONLY          | ABSENT          |
| Q8TD47     | N Only          | -1.5            | N ONLY          | T ONLY          | ABSENT          | T ONLY          | T ONLY          | T ONLY          | N ONLY          | T ONLY          |
| Q8TDJ6     | ABSENT          | ABSENT          | N ONLY          | ABSENT          | ABSENT          | ABSENT          | ABSENT          | ABSENT          | N ONLY          | N ONLY          |
| Q8TDQ7     | 2               | 3               | 1.00            | T ONLY          | ABSENT          | T ONLY          | ABSENT          | 3               | -2              | N ONLY          |
| Q8TDZ2     | T ONLY          | ABSENT          |
| Q8TEA8     | N Only          | N ONLY          | ABSENT          | 3               | ABSENT          | T ONLY          | T ONLY          | ABSENT          | ABSENT          | N ONLY          |
| Q8TEM1     | T ONLY          | ABSENT          | ABSENT          | T ONLY          | ABSENT          | ABSENT          | T ONLY          | ABSENT          | ABSENT          | T ONLY          |
| Q8TF61     | ABSENT          | ABSENT          | ABSENT          | ABSENT          | ABSENT          | N ONLY          | ABSENT          | ABSENT          | ABSENT          | ABSENT          |
| Q8WUD1     | -2.75           | N ONLY          | -3.50           | 1.57142857      | 1.5             | N ONLY          | 1.66666667      | ABSENT          | -1.5            | -6              |
| Q8WUM4     | 3               | -2              | 2.00            | 1               | 1               | N ONLY          | 7               | 1               | -3              | -1.25           |
| Q8WVC6     | -2              | -2              | ABSENT          | T ONLY          | ABSENT          | 2               | T ONLY          | 1               | T ONLY          | T ONLY          |
| Q8WVJ2     | 1               | T ONLY          | T ONLY          | T ONLY          | ABSENT          | T ONLY          | T ONLY          | 1               | -3              | ABSENT          |
| Q8WW59     | ABSENT          | ABSENT          | ABSENT          | ABSENT          | ABSENT          | N ONLY          | T ONLY          | ABSENT          | N ONLY          | N ONLY          |
| Q8WWI5     | T ONLY          | N ONLY          | ABSENT          | N ONLY          | -7              | ABSENT          | ABSENT          | N ONLY          | N ONLY          | T ONLY          |
| Q8WWY3     | ABSENT          | ABSENT          | ABSENT          | T ONLY          | ABSENT          | ABSENT          | ABSENT          | ABSENT          | ABSENT          | ABSENT          |
| Q8WXD9     | ABSENT          | N ONLY          | N ONLY          |
| Q8WXF7     | N Only          | ABSENT          | ABSENT          | N ONLY          | -3.5            |
| Q8WXH0     | ABSENT          |
| Q8WXI9     | ABSENT          |
| Q8WZ42     | N Only          | ABSENT          | ABSENT          | N ONLY          | ABSENT          | ABSENT          | T ONLY          | ABSENT          | -1.5            | ABSENT          |
| Q8WZA9     | ABSENT          | ABSENT          | T ONLY          | ABSENT          | N ONLY          | N ONLY          | T ONLY          | N ONLY          | N ONLY          | N ONLY          |
| Q92499     | ABSENT          | 2               | 2.00            | 3               | N ONLY          | 2               | -2              | 1.5             | -6              | 2               |
| Q92506     | 2               | -2              | T ONLY          | ABSENT          | ABSENT          | T ONLY          | 1               | 1               | N ONLY          | ABSENT          |
| Q92520     | ABSENT          | ABSENT          | ABSENT          | T ONLY          | ABSENT          | N ONLY          | ABSENT          | ABSENT          | ABSENT          | ABSENT          |
| Q92522     | -2.5            | 1.8             | ABSENT          | T ONLY          | -1.5            | T ONLY          |
| Q92526     | N Only          | 1               | 1.00            | T ONLY          | T ONLY          | 2               | T ONLY          | 2               | N ONLY          | 1               |
| Q92541     | ABSENT          |
| Q92542     | 1               | ABSENT          | ABSENT          | T ONLY          | ABSENT          | ABSENT          | T ONLY          | ABSENT          | ABSENT          | ABSENT          |

| Protein ID | FC 104T/104N | FC 105T/105N | FC 106T/106N | FC 111T/111N | FC 112T/112N | FC 121T/121N | FC 347T/347N | FC 353T/353N | FC 563T/563N | FC 537T/537N |
|------------|--------------|--------------|--------------|--------------|--------------|--------------|--------------|--------------|--------------|--------------|
| Q92556     | ABSENT       | ABSENT       | ABSENT       | ABSENT       | N ONLY       | ABSENT       | ABSENT       | N ONLY       | ABSENT       | ABSENT       |
| Q92561     | ABSENT       | ABSENT       | ABSENT       | N ONLY       | ABSENT       | N ONLY       | N ONLY       | ABSENT       | N ONLY       | N ONLY       |
| Q92572     | 1            | N ONLY       | ABSENT       | T ONLY       | T ONLY       | T ONLY       | 1            | ABSENT       | T ONLY       | ABSENT       |
| Q92598     | -12          | -2.5         | -1.60        | -1.6666667   | -2.5         | -2.3333333   | -1.4         | -1.6666667   | -6           | N ONLY       |
| Q92599     | -2.3333333   | -1.5         | 1.50         | -3           | -2.4         | -6           | 1.28571429   | -11          | -6           | -2.25        |
| Q92614     | ABSENT       | ABSENT       | ABSENT       | N ONLY       | ABSENT       | ABSENT       | ABSENT       | ABSENT       | N ONLY       | ABSENT       |
| Q92616     | T ONLY       | ABSENT       | ABSENT       | T ONLY       | ABSENT       | ABSENT       | ABSENT       | ABSENT       | ABSENT       | ABSENT       |
| Q92621     | ABSENT       | ABSENT       | ABSENT       | T ONLY       | ABSENT       | ABSENT       | ABSENT       | ABSENT       | ABSENT       | ABSENT       |
| Q92623     | ABSENT       | ABSENT       | ABSENT       | ABSENT       | ABSENT       | N ONLY       | ABSENT       | ABSENT       | ABSENT       | ABSENT       |
| Q92686     | ABSENT       | N ONLY       | -7.00        | -9           | -10          | N ONLY       | -5.3333333   | N ONLY       | N ONLY       | N ONLY       |
| Q92688     | 1.5          | T ONLY       | ABSENT       | T ONLY       | T ONLY       | ABSENT       | T ONLY       | T ONLY       | ABSENT       | N ONLY       |
| Q92752     | -3.9166667   | -2.25        | -2.67        | -31          | -18          | 1.79411765   | 1.7          | -1.2222222   | -5.4375      | -5.8571429   |
| Q92764     | N Only       | N ONLY       | -9.00        | N ONLY       | N ONLY       | ABSENT       | N ONLY       | ABSENT       | -4.5         | T ONLY       |
| Q92769     | ABSENT       | T ONLY       | ABSENT       | ABSENT       |
| Q92777     | N Only       | N ONLY       | N ONLY       | ABSENT       | ABSENT       | N ONLY       | N ONLY       | ABSENT       | N ONLY       | N ONLY       |
| Q92783     | ABSENT       | ABSENT       | ABSENT       | T ONLY       | ABSENT       | ABSENT       | ABSENT       | ABSENT       | ABSENT       | N ONLY       |
| Q92804     | T ONLY       | T ONLY       | ABSENT       | N ONLY       |
| Q92820     | ABSENT       | T ONLY       | ABSENT       | ABSENT       | ABSENT       | T ONLY       | ABSENT       | T ONLY       | ABSENT       | ABSENT       |
| Q92823     | -2           | -3           | -1.50        | N ONLY       | N ONLY       | -2           | -1.5         | N ONLY       | -3.5         | N ONLY       |
| Q92841     | -2           | T ONLY       | -1.50        | T ONLY       | N ONLY       | T ONLY       | 8            | 2.5          | 1.3333333    | N ONLY       |
| Q92878     | T ONLY       | T ONLY       | ABSENT       | T ONLY       | ABSENT       | ABSENT       | ABSENT       | ABSENT       | ABSENT       | ABSENT       |
| Q92900     | T ONLY       | N ONLY       | N ONLY       | T ONLY       | ABSENT       | ABSENT       | ABSENT       | 1            | N ONLY       | T ONLY       |
| Q92905     | -2           | N ONLY       | ABSENT       | N ONLY       | 1            | 1            | 1            | 1            | -3           | N ONLY       |
| Q92930     | -2           | T ONLY       | ABSENT       | ABSENT       | ABSENT       | 1            | ABSENT       | 1            | -1.5         | 4            |
| Q92945     | -2           | 9            | N ONLY       | T ONLY       | T ONLY       | 4            | 3            | T ONLY       | N ONLY       | -1.25        |
| Q92973     | 2            | T ONLY       | T ONLY       | 4            | T ONLY       | T ONLY       | 3            | 3            | N ONLY       | N ONLY       |
| Q92974     | T ONLY       | ABSENT       | N ONLY       | 6            | N ONLY       | ABSENT       |
| Q92979     | ABSENT       |
| Q93009     | N Only       | ABSENT       | ABSENT       | T ONLY       | ABSENT       | ABSENT       | T ONLY       | ABSENT       | ABSENT       | ABSENT       |
| Q93034     | T ONLY       | ABSENT       | ABSENT       | ABSENT       | ABSENT       | T ONLY       | ABSENT       | 3            | N ONLY       | ABSENT       |
| Q93045     | ABSENT       | -2           | N ONLY       | 2            | 3            | -4.5         | N ONLY       | 2            | N ONLY       | 1            |
| Q93050     | N Only       | N ONLY       | N ONLY       | N ONLY       | ABSENT       | N ONLY       | N ONLY       | ABSENT       | -90          | N ONLY       |
| Q93100     | ABSENT       | T ONLY       | ABSENT       | ABSENT       |
| Q95IE3     | ABSENT       | ABSENT       | ABSENT       | ABSENT       | T ONLY       | ABSENT       | ABSENT       | ABSENT       | ABSENT       | ABSENT       |
| Q969G3     | ABSENT       |
| Q969H8     | T ONLY       | -2           | N ONLY       | T ONLY       | 1            | ABSENT       | N ONLY       | T ONLY       | 1.3333333    | T ONLY       |
| Q969P0     | ABSENT       | N ONLY       | -9.00        | N ONLY       | N ONLY       | N ONLY       | -2.3333333   | -7           | N ONLY       | -5.25        |
| Q969T9     | T ONLY       | ABSENT       | ABSENT       | N ONLY       | N ONLY       | N ONLY       | N ONLY       | T ONLY       | -1.125       | -3           |
| Q969X5     | 1            | T ONLY       | ABSENT       | ABSENT       | ABSENT       | 3            | ABSENT       | T ONLY       | 1.3333333    | ABSENT       |
| Q969Z0     | ABSENT       |
| Q96A05     | N Only       | ABSENT       | N ONLY       | N ONLY       | T ONLY       | N ONLY       | N ONLY       | N ONLY       | -10.5        | -2.25        |
| Q96A08     | N Only       | T ONLY       | T ONLY       | T ONLY       | N ONLY       | T ONLY       | 1            | T ONLY       | 1.3333333    | 3            |
| Q96A26     | 1.5          | N ONLY       | -3.00        | 1            | 2            | N ONLY       | -4           | T ONLY       | -3           | -3.5         |
| Q96A33     | 1            | ABSENT       | ABSENT       | T ONLY       | ABSENT       | T ONLY       | T ONLY       | ABSENT       | ABSENT       | ABSENT       |
| Q96A65     | -2           | T ONLY       | ABSENT       | T ONLY       | ABSENT       | 1            | ABSENT       | ABSENT       | ABSENT       | ABSENT       |
| Q96AC1     | ABSENT       | T ONLY       | ABSENT       |
| Q96AE4     | 1            | T ONLY       | ABSENT       | T ONLY       | ABSENT       | T ONLY       | T ONLY       | T ONLY       | ABSENT       | N ONLY       |
| Q96AG4     | 1            | 2            | ABSENT       | T ONLY       | ABSENT       | T ONLY       | T ONLY       | T ONLY       | ABSENT       | T ONLY       |
| Q96AQ6     | -2           | T ONLY       | T ONLY       | T ONLY       | ABSENT       | ABSENT       | T ONLY       | T ONLY       | T ONLY       | 2            |
| Q96BM9     | -2           | -2           | N ONLY       | 2            | 4            | -1.3333333   | 2            | 3            | 1.6          | -1.5         |
| Q96BW5     | ABSENT       | T ONLY       | ABSENT       | T ONLY       | ABSENT       | ABSENT       | ABSENT       | ABSENT       | ABSENT       | ABSENT       |
| Q96C19     | T ONLY       | N ONLY       | -5.00        | -4           | T ONLY       | N ONLY       | 1            | N ONLY       | -2.25        | -2           |
| Q96CN7     | N Only       | 1            | T ONLY       | 1            | N ONLY       | ABSENT       | 1            | T ONLY       | -1.5         | ABSENT       |
| Q96CT7     | T ONLY       | ABSENT       | N ONLY       | ABSENT       |
| Q96CW1     | N Only       | N ONLY       | N ONLY       | 1            | 2            | -12          | -2.3333333   | -6           | -30          | N ONLY       |
| Q96CX2     | 1.4          | 5            | ABSENT       | ABSENT       | T ONLY       | ABSENT       | T ONLY       | T ONLY       | T ONLY       | N ONLY       |
| Q96DB2     | ABSENT       | ABSENT       | ABSENT       | ABSENT       | N ONLY       | ABSENT       | ABSENT       | N ONLY       | ABSENT       | N ONLY       |
| Q96DB5     | ABSENT       | T ONLY       | ABSENT       | ABSENT       | ABSENT       | ABSENT       | T ONLY       | ABSENT       | T ONLY       | ABSENT       |
| Q96DG6     | N Only       | ABSENT       | N ONLY       | T ONLY       | T ONLY       | N ONLY       | ABSENT       | ABSENT       | ABSENT       | ABSENT       |
| Q96E17     | ABSENT       | ABSENT       | N ONLY       | ABSENT       | ABSENT       | N ONLY       | ABSENT       | ABSENT       | N ONLY       | N ONLY       |
| Q96E39     | 6            | 5            | ABSENT       | T ONLY       | 1            | T ONLY       | ABSENT       | 2            | ABSENT       | 4            |
| Q96EK7     | T ONLY       | ABSENT       | ABSENT       | ABSENT       | N ONLY       | ABSENT       | ABSENT       | T ONLY       | ABSENT       | ABSENT       |

| Protein ID | FC 104T/104N | FC 105T/105N | FC 106T/106N | FC 111T/111N | FC 112T/112N | FC 121T/121N | FC 347T/347N | FC 353T/353N | FC 563T/563N | FC 537T/537N |
|------------|--------------|--------------|--------------|--------------|--------------|--------------|--------------|--------------|--------------|--------------|
| Q96EQ0     | ABSENT       | ABSENT       | ABSENT       | ABSENT       | N ONLY       | N ONLY       | ABSENT       | N ONLY       | N ONLY       | N ONLY       |
| Q96F07     | -1.25        | 2.5          | -10.00       | 2            | -2           | -3           | -5.6666667   | 5            | -4.5         | N ONLY       |
| Q96F85     | ABSENT       | N ONLY       | ABSENT       | N ONLY       | ABSENT       | N ONLY       | ABSENT       | ABSENT       | N ONLY       | ABSENT       |
| Q96FC7     | -2           | 2            | ABSENT       | ABSENT       | ABSENT       | 1            | T ONLY       | T ONLY       | -3           | N ONLY       |
| Q96FE5     | ABSENT       | ABSENT       | N ONLY       | ABSENT       | ABSENT       | N ONLY       | N ONLY       | ABSENT       | N ONLY       | N ONLY       |
| Q96FJ2     | 1            | N ONLY       | N ONLY       | 2            | T ONLY       | N ONLY       | N ONLY       | T ONLY       | -6.75        | N ONLY       |
| Q96FN4     | -2           | -1.5         | -2.00        | 5            | 3            | -4           | 2            | 1            | N ONLY       | 2            |
| Q96FW1     | -3           | 2            | N ONLY       | -4           | N ONLY       | N ONLY       | N ONLY       | N ONLY       | -7.5         | -1.75        |
| Q96FZ7     | ABSENT       | ABSENT       | T ONLY       | N ONLY       | ABSENT       | ABSENT       | N ONLY       | T ONLY       | N ONLY       | N ONLY       |
| Q96G03     | ABSENT       | 2            | T ONLY       | T ONLY       | ABSENT       | T ONLY       | T ONLY       | 3            | ABSENT       | ABSENT       |
| Q96GA7     | 1            | 2            | ABSENT       | ABSENT       | ABSENT       | ABSENT       | ABSENT       | ABSENT       | T ONLY       | ABSENT       |
| Q96GC5     | ABSENT       | N ONLY       |
| Q96GD0     | 1            | -3           | -4.00        | -2           | 1            | -3           | -4           | -4           | N ONLY       | -3           |
| Q96GK7     | N Only       | ABSENT       | N ONLY       | N ONLY       | ABSENT       | T ONLY       | T ONLY       | T ONLY       | ABSENT       | ABSENT       |
| Q96GR2     | ABSENT       |
| Q96GW7     | -2.7333333   | 7            | 1.00         | 6.6666667    | N ONLY       | 15           | 25           | 2.2222222    | 4.8          | 3            |
| Q96HE7     | ABSENT       | ABSENT       | ABSENT       | ABSENT       | ABSENT       | N ONLY       | T ONLY       | ABSENT       | ABSENT       | T ONLY       |
| Q96HN2     | -2           | -2.25        | -2.00        | ABSENT       | N ONLY       | N ONLY       | ABSENT       | ABSENT       | -4.5         | -2.5         |
| Q96HS1     | ABSENT       | T ONLY       | ABSENT       | T ONLY       | ABSENT       | 2            | T ONLY       | T ONLY       | N ONLY       | N ONLY       |
| Q96HU8     | ABSENT       | N ONLY       | ABSENT       | N ONLY       | N ONLY       | N ONLY       | -3           | N ONLY       | N ONLY       | N ONLY       |
| Q96I24     | ABSENT       | T ONLY       | ABSENT       | N ONLY       |
| Q96I99     | N Only       | T ONLY       | ABSENT       | 1            | ABSENT       | T ONLY       | ABSENT       | T ONLY       | ABSENT       | N ONLY       |
| Q96ID5     | ABSENT       | ABSENT       | N ONLY       | N ONLY       | ABSENT       | N ONLY       | N ONLY       | ABSENT       | N ONLY       | N ONLY       |
| Q96IU4     | ABSENT       | N ONLY       | T ONLY       | T ONLY       | ABSENT       | ABSENT       | ABSENT       | ABSENT       | T ONLY       | ABSENT       |
| Q96IX5     | -2.5         | N ONLY       | -2.00        | 1            | -2           | 1            | -3           | N ONLY       | N ONLY       | -1.25        |
| Q96JE9     | N Only       | N ONLY       | N ONLY       | ABSENT       | T ONLY       | N ONLY       | -1.5         | ABSENT       | N ONLY       | N ONLY       |
| Q96K76     | ABSENT       | ABSENT       | ABSENT       | T ONLY       | ABSENT       | ABSENT       | ABSENT       | ABSENT       | ABSENT       | ABSENT       |
| Q96KB5     | ABSENT       |
| Q96KP4     | -1.2         | 1.6666667    | T ONLY       | 2            | -2           | 1.6          | 2            | -3           | 2            | -1.8333333   |
| Q96L21     | N Only       | 1            | T ONLY       | T ONLY       | T ONLY       | 2            | -2           | 1            | -1.5         | N ONLY       |
| Q96L92     | ABSENT       | ABSENT       | ABSENT       | T ONLY       | ABSENT       | N ONLY       | ABSENT       | T ONLY       | N ONLY       | ABSENT       |
| Q96MM6     | N Only       | N ONLY       | -3.50        | N ONLY       | -1.5         | N ONLY       | -1.5         | N ONLY       | N ONLY       | -3.5         |
| Q96P70     | 2            | T ONLY       | ABSENT       | 3            | ABSENT       | T ONLY       | ABSENT       | ABSENT       | ABSENT       | ABSENT       |
| Q96PE3     | N Only       | N ONLY       | ABSENT       | N ONLY       | ABSENT       | ABSENT       | T ONLY       | ABSENT       | ABSENT       | ABSENT       |
| Q96PE5     | ABSENT       | N ONLY       | ABSENT       | N ONLY       | ABSENT       | ABSENT       | ABSENT       | N ONLY       | ABSENT       | N ONLY       |
| Q96PK2     | ABSENT       | ABSENT       | -1.50        | ABSENT       | ABSENT       | ABSENT       | T ONLY       | ABSENT       | ABSENT       | ABSENT       |
| Q96PK6     | ABSENT       | ABSENT       | ABSENT       | T ONLY       | ABSENT       | ABSENT       | ABSENT       | N ONLY       | ABSENT       | ABSENT       |
| Q96PU8     | -1.5         | T ONLY       | ABSENT       | T ONLY       | N ONLY       | T ONLY       | T ONLY       | 1.5          | N ONLY       | 2            |
| Q96PV0     | ABSENT       | ABSENT       | N ONLY       | ABSENT       | ABSENT       | N ONLY       | N ONLY       | ABSENT       | N ONLY       | N ONLY       |
| Q96PY5     | 6            | 1            | T ONLY       | -6           | -9           | T ONLY       | 3.5          | N ONLY       | -1.5         | -1.5         |
| Q96QK1     | 1            | -1.3333333   | -2.67        | 1.3333333    | -2           | -8           | -1.6666667   | 4            | -3           | N ONLY       |
| Q96QR8     | -2           | T ONLY       | T ONLY       | N ONLY       | ABSENT       | -4           | -2           | T ONLY       | N ONLY       | N ONLY       |
| Q96RP9     | ABSENT       | ABSENT       | ABSENT       | ABSENT       | ABSENT       | ABSENT       | T ONLY       | T ONLY       | ABSENT       | ABSENT       |
| Q96S19     | ABSENT       | T ONLY       | ABSENT       | ABSENT       | ABSENT       | T ONLY       | ABSENT       | T ONLY       | ABSENT       | ABSENT       |
| Q96ST3     | ABSENT       |
| Q96TA1     | T ONLY       | ABSENT       | T ONLY       | T ONLY       | ABSENT       | ABSENT       | ABSENT       | ABSENT       | ABSENT       | ABSENT       |
| Q96TC7     | ABSENT       | T ONLY       | ABSENT       | T ONLY       | ABSENT       | 1            | ABSENT       | T ONLY       | ABSENT       | ABSENT       |
| Q99250     | ABSENT       | ABSENT       | N ONLY       | ABSENT       | ABSENT       | ABSENT       | ABSENT       | ABSENT       | N ONLY       | ABSENT       |
| Q99426     | 1.6          | -1.25        | 2.00         | 1            | -1.25        | 1            | 1.1666667    | 1.125        | 1.1111111    | -1.5         |
| Q99436     | T ONLY       | 1            | N ONLY       | T ONLY       | T ONLY       | ABSENT       | N ONLY       | ABSENT       | -3           | N ONLY       |
| Q99442     | N Only       | ABSENT       | N ONLY       | ABSENT       |
| Q99456     | 1.5          | -5           | 1.14         | 1.09375      | 1.25         | -1.3809524   | 1.7777778    | -1.375       | -6           | 1            |
| Q99459     | ABSENT       | ABSENT       | ABSENT       | T ONLY       | ABSENT       | ABSENT       | T ONLY       | ABSENT       | ABSENT       | ABSENT       |
| Q99460     | N Only       | ABSENT       | ABSENT       | T ONLY       | N ONLY       | N ONLY       | ABSENT       | T ONLY       | ABSENT       | ABSENT       |
| Q99471     | -2           | N ONLY       | N ONLY       | T ONLY       | T ONLY       | 1            | T ONLY       | T ONLY       | T ONLY       | ABSENT       |
| Q99497     | -5           | 5            | N ONLY       | N ONLY       | ABSENT       | -1.3333333   | 4            | 1            | 3.3333333    | 4            |
| Q99536     | 6            | 1.3333333    | T ONLY       | 3.5          | 4            | T ONLY       | 7            | 1.25         | 2.8888889    | 2            |
| Q99584     | 1.5          | N ONLY       | -3.00        | N ONLY       | ABSENT       | N ONLY       | ABSENT       | ABSENT       | 2            | -3.5         |
| Q99598     | N Only       | T ONLY       | ABSENT       | ABSENT       | ABSENT       | T ONLY       | ABSENT       | ABSENT       | ABSENT       | T ONLY       |
| Q99613     | 1            | T ONLY       | ABSENT       | T ONLY       | ABSENT       | T ONLY       | T ONLY       | T ONLY       | T ONLY       | ABSENT       |
| Q99623     | -1.7272727   | 1            | -3.00        | -1.3333333   | 1.42857143   | -1.75        | 1.29411765   | 3            | -3           | -1.75        |
| Q99653     | -2           | ABSENT       | N ONLY       | N ONLY       | T ONLY       | N ONLY       | -2           | ABSENT       | N ONLY       | N ONLY       |





| Protein ID | FC 104T/104N | FC 105T/105N | FC 106T/106N | FC 111T/111N | FC 112T/112N | FC 121T/121N | FC 347T/347N | FC 353T/353N | FC 563T/563N | FC 537T/537N |
|------------|--------------|--------------|--------------|--------------|--------------|--------------|--------------|--------------|--------------|--------------|
| Q9BY11     | N Only       | ABSENT       | N ONLY       | N ONLY       | -1.5         | N ONLY       | -1.5         | N ONLY       | N ONLY       | N ONLY       |
| Q9BYC2     | N Only       | 1            | N ONLY       | N ONLY       | ABSENT       | N ONLY       | ABSENT       | T ONLY       | N ONLY       | N ONLY       |
| Q9BYC9     | T ONLY       | ABSENT       |
| Q9BYD1     | ABSENT       |
| Q9BYT8     | ABSENT       | T ONLY       | ABSENT       | T ONLY       | ABSENT       | N ONLY       | T ONLY       | T ONLY       | ABSENT       | ABSENT       |
| Q9BZZ5     | ABSENT       | ABSENT       | ABSENT       | T ONLY       | ABSENT       | ABSENT       | ABSENT       | T ONLY       | ABSENT       | ABSENT       |
| Q9C040     | ABSENT       | ABSENT       | N ONLY       | ABSENT       | N ONLY       | ABSENT       | 2            | -2           | N ONLY       | N ONLY       |
| Q9C075     | ABSENT       | N ONLY       | ABSENT       | N ONLY       | ABSENT       | ABSENT       | ABSENT       | ABSENT       | ABSENT       | ABSENT       |
| Q9C0H9     | ABSENT       | ABSENT       | ABSENT       | ABSENT       | ABSENT       | N ONLY       | ABSENT       | N ONLY       | N ONLY       | N ONLY       |
| Q9GZL7     | ABSENT       | ABSENT       | ABSENT       | T ONLY       | ABSENT       | ABSENT       | ABSENT       | ABSENT       | ABSENT       | ABSENT       |
| Q9GZM7     | ABSENT       |
| Q9GZP4     | N Only       | -3           | T ONLY       | N ONLY       | ABSENT       | -3           | 4            | N ONLY       | -1.5         | N ONLY       |
| Q9GZT3     | ABSENT       | T ONLY       | ABSENT       | ABSENT       | ABSENT       | -2           | T ONLY       | ABSENT       | T ONLY       | ABSENT       |
| Q9GZT6     | ABSENT       |
| Q9GZT8     | N Only       | N ONLY       | ABSENT       | N ONLY       | ABSENT       | T ONLY       | T ONLY       | T ONLY       | ABSENT       | ABSENT       |
| Q9GZV7     | N Only       | N ONLY       | 1.00         | N ONLY       | -5           | ABSENT       | -3           | N ONLY       | N ONLY       | -2.5         |
| Q9GZZ1     | T ONLY       | ABSENT       | ABSENT       | T ONLY       | ABSENT       | 1            | ABSENT       | ABSENT       | ABSENT       | ABSENT       |
| Q9H008     | N Only       | -2           | T ONLY       | ABSENT       | ABSENT       | ABSENT       | ABSENT       | 1            | -1.5         | N ONLY       |
| Q9H061     | N Only       | N ONLY       | ABSENT       | ABSENT       | ABSENT       | N ONLY       | ABSENT       | ABSENT       | N ONLY       | N ONLY       |
| Q9H078     | ABSENT       |
| Q9H098     | ABSENT       |
| Q9H0Q0     | -2           | T ONLY       | -2.00        | 1            | -2           | 1            | T ONLY       | -1.5         | -12          | N ONLY       |
| Q9H0R4     | 2            | N ONLY       | 1.50         | 1            | T ONLY       | 1            | T ONLY       | ABSENT       | -1.5         | 1            |
| Q9H0U4     | -1.5         | N ONLY       | ABSENT       | 1            | ABSENT       | 1.5          | N ONLY       | 5            | -1.5         | N ONLY       |
| Q9H115     | -6.5         | N ONLY       | -4.00        | N ONLY       | 1            | -20          | -1.5555556   | N ONLY       | -24          | -10.5        |
| Q9H1E3     | 2            | T ONLY       | ABSENT       | T ONLY       | ABSENT       | ABSENT       | ABSENT       | ABSENT       | ABSENT       | ABSENT       |
| Q9H1K4     | ABSENT       | 1            | N ONLY       | -3           | T ONLY       | N ONLY       | -2           | N ONLY       | N ONLY       | -1.25        |
| Q9H1V8     | ABSENT       | ABSENT       | N ONLY       | ABSENT       | ABSENT       | N ONLY       | ABSENT       | ABSENT       | N ONLY       | N ONLY       |
| Q9H254     | N Only       | T ONLY       | 1.00         | N ONLY       | ABSENT       | 1            | 1            | T ONLY       | -2           | N ONLY       |
| Q9H299     | 1            | -3           | 1.50         | 1.5          | 1.33333333   | 3            | -3           | 1.5          | -1.1666667   | -1.5         |
| Q9H2D6     | ABSENT       | T ONLY       | ABSENT       | ABSENT       | ABSENT       | ABSENT       | T ONLY       | ABSENT       | ABSENT       | ABSENT       |
| Q9H2H8     | T ONLY       | ABSENT       | N ONLY       | 1            | N ONLY       | ABSENT       | T ONLY       | ABSENT       | ABSENT       | ABSENT       |
| Q9H2M9     | N Only       | T ONLY       | ABSENT       | T ONLY       | ABSENT       | ABSENT       | ABSENT       | 2            | T ONLY       | N ONLY       |
| Q9H2U2     | T ONLY       | -1.33333333  | N ONLY       | T ONLY       | ABSENT       | T ONLY       | T ONLY       | T ONLY       | N ONLY       | N ONLY       |
| Q9H2X9     | ABSENT       | ABSENT       | N ONLY       | N ONLY       | ABSENT       | N ONLY       | N ONLY       | ABSENT       | N ONLY       | N ONLY       |
| Q9H307     | T ONLY       | ABSENT       |
| Q9H361     | T ONLY       | 1            | T ONLY       | T ONLY       | N ONLY       | ABSENT       | 1            | T ONLY       | ABSENT       | N ONLY       |
| Q9H3N1     | -1.33333333  | 2            | T ONLY       | 1            | T ONLY       | ABSENT       |
| Q9H3S7     | ABSENT       | ABSENT       | ABSENT       | N ONLY       | ABSENT       | ABSENT       | ABSENT       | ABSENT       | ABSENT       | N ONLY       |
| Q9H425     | N Only       | ABSENT       | ABSENT       | N ONLY       | ABSENT       | T ONLY       | ABSENT       | -3           | N ONLY       | 1            |
| Q9H444     | -1.5         | 1.33333333   | T ONLY       | -1.5         | -2           | 1.66666667   | 1.33333333   | 1.33333333   | -1.875       | 2            |
| Q9H479     | -3           | N ONLY       | -2.00        | N ONLY       | 1            | -3           | 2            | 1.33333333   | N ONLY       | N ONLY       |
| Q9H4A3     | ABSENT       | ABSENT       | ABSENT       | T ONLY       | ABSENT       | ABSENT       | ABSENT       | ABSENT       | ABSENT       | N ONLY       |
| Q9H4A4     | ABSENT       | T ONLY       | ABSENT       | ABSENT       | ABSENT       | ABSENT       | T ONLY       | ABSENT       | ABSENT       | ABSENT       |
| Q9H4B7     | -1.9294118   | -1.1729323   | 1.23         | -1.1176471   | -1.6721311   | -3.3786408   | 1.15300546   | -2.1018519   | -3.1737805   | -3.0447761   |
| Q9H4G0     | N Only       | N ONLY       | N ONLY       | ABSENT       | ABSENT       | N ONLY       | N ONLY       | ABSENT       | N ONLY       | N ONLY       |
| Q9H4G4     | -1.25        | 1.2          | 1.25         | -1.33333333  | 1            | -2           | 1            | 1.4          | -1.5         | 1.11111111   |
| Q9H4M9     | -2           | 1            | N ONLY       | T ONLY       | ABSENT       | N ONLY       | -4           | -2           | N ONLY       | -1.25        |
| Q9H6R3     | ABSENT       |
| Q9H7C9     | ABSENT       | T ONLY       | T ONLY       | ABSENT       | ABSENT       | T ONLY       | ABSENT       | ABSENT       | ABSENT       | ABSENT       |
| Q9H7Z7     | T ONLY       | T ONLY       | N ONLY       | ABSENT       | ABSENT       | N ONLY       | N ONLY       | T ONLY       | N ONLY       | 2            |
| Q9H845     | ABSENT       | T ONLY       | ABSENT       | T ONLY       | ABSENT       | ABSENT       | ABSENT       | ABSENT       | ABSENT       | ABSENT       |
| Q9H902     | ABSENT       | N ONLY       | ABSENT       | ABSENT       | ABSENT       | N ONLY       | ABSENT       | ABSENT       | N ONLY       | ABSENT       |
| Q9H936     | ABSENT       | 2            | N ONLY       | -5           | 2            | N ONLY       | -2           | N ONLY       | N ONLY       | -1.5         |
| Q9H9B4     | -7           | -3           | N ONLY       | -6           | ABSENT       | -1.25        | -1.33333333  | T ONLY       | -7.5         | N ONLY       |
| Q9H9H5     | ABSENT       | N ONLY       | ABSENT       | N ONLY       | N ONLY       | N ONLY       | T ONLY       | N ONLY       | ABSENT       | ABSENT       |
| Q9H9S4     | N Only       | N ONLY       | 1.00         | N ONLY       | ABSENT       | ABSENT       | 1            | ABSENT       | N ONLY       | ABSENT       |
| Q9HAB8     | ABSENT       |
| Q9HAV0     | -1.7272727   | -3.33333333  | -9.00        | -2.6         | -1.5384615   | -3.9090909   | -2.7777778   | 1.07692308   | -5.6666667   | -10.166667   |
| Q9HAV4     | T ONLY       | ABSENT       | ABSENT       | T ONLY       | ABSENT       | ABSENT       | ABSENT       | ABSENT       | ABSENT       | ABSENT       |
| Q9HAV7     | ABSENT       | T ONLY       | ABSENT       | N ONLY       |
| Q9HB07     | T ONLY       | T ONLY       | ABSENT       | ABSENT       | ABSENT       | ABSENT       | ABSENT       | T ONLY       | ABSENT       | ABSENT       |

| Protein ID | FC 104T/104N | FC 105T/105N | FC 106T/106N | FC 111T/111N | FC 112T/112N | FC 121T/121N | FC 347T/347N | FC 353T/353N | FC 563T/563N | FC 537T/537N |
|------------|--------------|--------------|--------------|--------------|--------------|--------------|--------------|--------------|--------------|--------------|
| Q9HB71     | 1            | -4           | -3.00        | 1.33333333   | 3            | 1            | 2            | -2           | 2            | N ONLY       |
| Q9HBA9     | ABSENT       | ABSENT       | ABSENT       | ABSENT       | ABSENT       | ABSENT       | T ONLY       | N ONLY       | ABSENT       | N ONLY       |
| Q9HC38     | 2            | 1.5          | -2.00        | 2            | -3           | 1.25         | 6            | -1.5         | -1.5         | N ONLY       |
| Q9HCB6     | N Only       | ABSENT       | ABSENT       | ABSENT       | ABSENT       | T ONLY       | ABSENT       | ABSENT       | ABSENT       | ABSENT       |
| Q9HCC0     | N Only       | -1.5         | N ONLY       | ABSENT       | N ONLY       | T ONLY       | T ONLY       | T ONLY       | ABSENT       | ABSENT       |
| Q9HCD6     | ABSENT       | N ONLY       | N ONLY       |
| Q9HCJ6     | N Only       | N ONLY       | N ONLY       | T ONLY       | T ONLY       | N ONLY       | 2            | T ONLY       | ABSENT       | ABSENT       |
| Q9HCM2     | ABSENT       | ABSENT       | N ONLY       | ABSENT       | ABSENT       | N ONLY       | 1            | ABSENT       | N ONLY       | 1            |
| Q9HD33     | ABSENT       | ABSENT       | ABSENT       | T ONLY       | ABSENT       | ABSENT       | ABSENT       | ABSENT       | ABSENT       | ABSENT       |
| Q9HDC9     | T ONLY       | ABSENT       | N ONLY       | 6            | T ONLY       | 1            | N ONLY       | 1.5          | -3           | N ONLY       |
| Q9NNW7     | N Only       | ABSENT       | ABSENT       | ABSENT       | ABSENT       | ABSENT       | ABSENT       | T ONLY       | ABSENT       | ABSENT       |
| Q9NP72     | -2.5         | -6           | N ONLY       | -2           | 1.25         | -2           | 1.25         | T ONLY       | -2.625       | -1.33333333  |
| Q9NPA0     | ABSENT       | T ONLY       | ABSENT       |
| Q9NPH2     | ABSENT       |
| Q9NPJ3     | -2           | 4            | -2.33        | 2            | T ONLY       | -2           | -1.5         | T ONLY       | -5           | N ONLY       |
| Q9NQ48     | ABSENT       | ABSENT       | ABSENT       | ABSENT       | ABSENT       | T ONLY       | T ONLY       | 4            | N ONLY       | N ONLY       |
| Q9NQ50     | ABSENT       |
| Q9NQ66     | ABSENT       | ABSENT       | -10.00       | N ONLY       | N ONLY       | N ONLY       | N ONLY       | -3           | N ONLY       | N ONLY       |
| Q9NQC3     | 1            | N ONLY       | N ONLY       | 1            | 1            | -2           | T ONLY       | N ONLY       | -3.9         | -3.33333333  |
| Q9NQG5     | T ONLY       | ABSENT       |
| Q9NQR4     | ABSENT       | N ONLY       | N ONLY       | N ONLY       | ABSENT       | T ONLY       | ABSENT       | T ONLY       | -3           | N ONLY       |
| Q9NQW6     | N Only       | N ONLY       | T ONLY       | N ONLY       | N ONLY       | ABSENT       | T ONLY       | N ONLY       | N ONLY       | -3.25        |
| Q9NQW7     | ABSENT       | T ONLY       | ABSENT       | T ONLY       | N ONLY       | ABSENT       | T ONLY       | 1            | -1.5         | T ONLY       |
| Q9NQX4     | ABSENT       | N ONLY       | N ONLY       | ABSENT       | T ONLY       | N ONLY       | N ONLY       | N ONLY       | N ONLY       | 1            |
| Q9NR28     | 1            | N ONLY       | N ONLY       | 2            | ABSENT       | 1            | -1.5         | T ONLY       | -2.25        | 1            |
| Q9NR30     | ABSENT       |
| Q9NR31     | 2.33333333   | 1.5          | -1.33        | 2.66666667   | 1.66666667   | -2.5         | 1            | ABSENT       | -1.8         | -1.25        |
| Q9NR46     | ABSENT       | ABSENT       | N ONLY       | ABSENT       | ABSENT       | N ONLY       |
| Q9NRF8     | ABSENT       | T ONLY       | T ONLY       | T ONLY       | ABSENT       | ABSENT       | ABSENT       | ABSENT       | ABSENT       | N ONLY       |
| Q9NRG7     | ABSENT       | ABSENT       | ABSENT       | ABSENT       | ABSENT       | ABSENT       | T ONLY       | N ONLY       | N ONLY       | ABSENT       |
| Q9NRV9     | -2           | -1.5         | T ONLY       | -4           | 2            | -2           | 2            | -4           | ABSENT       | N ONLY       |
| Q9NRW1     | -1.625       | 1.1          | 2.80         | -1.33333333  | 1.11111111   | -1.9090909   | 1.55555556   | 1            | -4.9285714   | -2.75        |
| Q9NRW7     | N Only       | N ONLY       | N ONLY       | ABSENT       | ABSENT       | ABSENT       | ABSENT       | N ONLY       | ABSENT       | ABSENT       |
| Q9NS69     | ABSENT       | ABSENT       | ABSENT       | T ONLY       | ABSENT       | ABSENT       | ABSENT       | ABSENT       | ABSENT       | ABSENT       |
| Q9NS86     | ABSENT       | ABSENT       | N ONLY       | N ONLY       | ABSENT       | N ONLY       | N ONLY       | ABSENT       | N ONLY       | ABSENT       |
| Q9NSB2     | -1.5         | -3.16666667  | 5.00         | 2.58333333   | 7.5          | 3            | 7            | 12           | T ONLY       | T ONLY       |
| Q9NSB4     | ABSENT       | ABSENT       | ABSENT       | T ONLY       | N ONLY       | ABSENT       | ABSENT       | ABSENT       | N ONLY       | ABSENT       |
| Q9NSC5     | ABSENT       |
| Q9NSD9     | N Only       | 1.66666667   | -2.00        | T ONLY       | ABSENT       | N ONLY       | 2            | ABSENT       | N ONLY       | -3           |
| Q9NSE4     | N Only       | ABSENT       | N ONLY       | ABSENT       | ABSENT       | T ONLY       | N ONLY       | ABSENT       | -1.5         | -2           |
| Q9NT62     | 2            | N ONLY       | ABSENT       | ABSENT       | ABSENT       | ABSENT       | T ONLY       | T ONLY       | ABSENT       | ABSENT       |
| Q9NTI5     | ABSENT       |
| Q9NTJ3     | ABSENT       | ABSENT       | ABSENT       | T ONLY       | ABSENT       | ABSENT       | ABSENT       | ABSENT       | ABSENT       | ABSENT       |
| Q9NTK5     | -1.33333333  | -2           | -1.33        | 2            | 1.5          | -1.5         | 1.33333333   | -1.66666667  | N ONLY       | 1.33333333   |
| Q9NTX5     | ABSENT       | N ONLY       | ABSENT       | T ONLY       | T ONLY       | ABSENT       | T ONLY       | N ONLY       | ABSENT       | T ONLY       |
| Q9NUB1     | ABSENT       | ABSENT       | N ONLY       | T ONLY       | N ONLY       | ABSENT       | N ONLY       | N ONLY       | N ONLY       | N ONLY       |
| Q9NUJ1     | -2           | 2            | N ONLY       | T ONLY       | T ONLY       | -2           | T ONLY       | T ONLY       | N ONLY       | N ONLY       |
| Q9NUP9     | 1            | T ONLY       | T ONLY       | T ONLY       | ABSENT       | ABSENT       | T ONLY       | ABSENT       | ABSENT       | N ONLY       |
| Q9NUQ2     | ABSENT       | ABSENT       | ABSENT       | T ONLY       | ABSENT       | ABSENT       | ABSENT       | ABSENT       | ABSENT       | ABSENT       |
| Q9NUQ9     | N Only       | 1            | -4.00        | 1            | -2.5         | -1.5         | 1            | -1.5         | -10.5        | N ONLY       |
| Q9NV70     | ABSENT       | T ONLY       | ABSENT       | ABSENT       | ABSENT       | T ONLY       | T ONLY       | 2            | T ONLY       | ABSENT       |
| Q9NVA1     | ABSENT       | N ONLY       |
| Q9NVA2     | -1.2         | 1.5          | -3.00        | -1.25        | 6            | -3           | 1.33333333   | 1            | -7.5         | -2.83333333  |
| Q9NVI7     | ABSENT       | -3           | ABSENT       | ABSENT       | ABSENT       | -2           | N ONLY       | ABSENT       | ABSENT       | N ONLY       |
| Q9NVJ2     | -2.5         | -2.5         | N ONLY       | 2            | 4            | -1.33333333  | 2            | 3            | 1.73333333   | -1.5         |
| Q9NVP1     | ABSENT       |
| Q9NVS9     | N Only       | -2           | 1.00         | T ONLY       | T ONLY       | T ONLY       | ABSENT       | ABSENT       | ABSENT       | 1            |
| Q9NVV4     | ABSENT       |
| Q9NWU5     | ABSENT       |
| Q9NX05     | ABSENT       |
| Q9NX46     | ABSENT       | ABSENT       | ABSENT       | T ONLY       | ABSENT       | ABSENT       | ABSENT       | ABSENT       | T ONLY       | ABSENT       |
| Q9NX63     | N Only       | 1.5          | 1.00         | T ONLY       | T ONLY       | -2           | 1            | 2            | -3           | -2           |



| Protein ID | FC 104T/104N | FC 105T/105N | FC 106T/106N | FC 111T/111N | FC 112T/112N | FC 121T/121N | FC 347T/347N | FC 353T/353N | FC 563T/563N | FC 537T/537N |
|------------|--------------|--------------|--------------|--------------|--------------|--------------|--------------|--------------|--------------|--------------|
| Q9UH99     | ABSENT       | ABSENT       | ABSENT       | T ONLY       | ABSENT       | ABSENT       | ABSENT       | T ONLY       | ABSENT       | N ONLY       |
| Q9UHB6     | ABSENT       | T ONLY       | ABSENT       | 2            | ABSENT       | T ONLY       | ABSENT       | T ONLY       | ABSENT       | ABSENT       |
| Q9UHB9     | ABSENT       | T ONLY       | ABSENT       | T ONLY       |
| Q9UHC6     | ABSENT       | ABSENT       | ABSENT       | N ONLY       | ABSENT       | ABSENT       | N ONLY       | ABSENT       | ABSENT       | N ONLY       |
| Q9UHD8     | 1            | 1.33333333   | -2.00        | 4            | ABSENT       | ABSENT       | 3            | 2            | -1.5         | 1            |
| Q9UHG2     | N Only       | N ONLY       | N ONLY       | N ONLY       | T ONLY       | N ONLY       | N ONLY       | ABSENT       | N ONLY       | N ONLY       |
| Q9UHL4     | T ONLY       | ABSENT       |
| Q9UHQ9     | 1.66666667   | 1            | T ONLY       | 1            | T ONLY       | 6            | T ONLY       | 1            | -2.5         | 2.66666667   |
| Q9UHV9     | 1            | -4           | -5.00        | T ONLY       | -6           | 1            |
| Q9UHW9     | ABSENT       | ABSENT       | N ONLY       | N ONLY       | ABSENT       | N ONLY       | N ONLY       | ABSENT       | N ONLY       | N ONLY       |
| Q9UHX1     | ABSENT       | T ONLY       |
| Q9UHY7     | 2            | -4           | -1.50        | 2            | 1.5          | N ONLY       | -2           | 1            | -3           | N ONLY       |
| Q9UI09     | 1            | N ONLY       | N ONLY       | ABSENT       | ABSENT       | N ONLY       | 1            | T ONLY       | N ONLY       | N ONLY       |
| Q9UI12     | N Only       | N ONLY       | N ONLY       | N ONLY       | ABSENT       | N ONLY       | N ONLY       | N ONLY       | N ONLY       | -3           |
| Q9UI15     | -1.125       | -4.66666667  | -3.17        | -1.75        | 1.625        | -1.66666667  | -1.66666667  | -1.83333333  | -7.5         | -6           |
| Q9UI47     | 1            | ABSENT       | T ONLY       | ABSENT       | ABSENT       | ABSENT       | ABSENT       | ABSENT       | T ONLY       | ABSENT       |
| Q9UIA9     | T ONLY       | 2            | N ONLY       | T ONLY       | N ONLY       | T ONLY       | 2            | 1            | 1.33333333   | ABSENT       |
| Q9UIC8     | N Only       | ABSENT       | N ONLY       | ABSENT       |
| Q9UIJ7     | N Only       | -2           | T ONLY       | T ONLY       | T ONLY       | 2            | 1            | ABSENT       | 1.66666667   | 2            |
| Q9UIW2     | ABSENT       | ABSENT       | N ONLY       | ABSENT       | ABSENT       | N ONLY       | 1            | ABSENT       | N ONLY       | N ONLY       |
| Q9UJ70     | T ONLY       | T ONLY       | ABSENT       | T ONLY       | T ONLY       | T ONLY       | T ONLY       | 7            | -1.5         | 2            |
| Q9UJ50     | N Only       | T ONLY       | N ONLY       | ABSENT       | ABSENT       | N ONLY       | -2           | N ONLY       | N ONLY       | -2           |
| Q9UJU6     | N Only       | 2            | T ONLY       | ABSENT       | ABSENT       | -2           | ABSENT       | N ONLY       | ABSENT       | ABSENT       |
| Q9UJY1     | T ONLY       | ABSENT       | T ONLY       | ABSENT       |
| Q9UK22     | -2           | N ONLY       | 2.00         | N ONLY       | 2            | N ONLY       | T ONLY       | T ONLY       | T ONLY       | -2           |
| Q9UK41     | ABSENT       | ABSENT       | ABSENT       | ABSENT       | ABSENT       | T ONLY       | ABSENT       | ABSENT       | ABSENT       | ABSENT       |
| Q9UKA9     | ABSENT       | T ONLY       | ABSENT       |
| Q9UKK9     | 3            | N ONLY       | ABSENT       | 5            | T ONLY       | N ONLY       | T ONLY       | N ONLY       | -1.5         | 4            |
| Q9UKM9     | 1.5          | T ONLY       | ABSENT       | T ONLY       | T ONLY       | 2            | T ONLY       | 5            | ABSENT       | T ONLY       |
| Q9UKU0     | 1            | 2            | ABSENT       | 1            | ABSENT       | N ONLY       | 3            | N ONLY       | N ONLY       | N ONLY       |
| Q9UKU7     | ABSENT       | T ONLY       | ABSENT       | ABSENT       | ABSENT       | ABSENT       | T ONLY       | T ONLY       | ABSENT       | ABSENT       |
| Q9UKV3     | ABSENT       |
| Q9UKX2     | ABSENT       | ABSENT       | ABSENT       | N ONLY       | ABSENT       | ABSENT       | ABSENT       | ABSENT       | ABSENT       | ABSENT       |
| Q9UKX3     | ABSENT       | ABSENT       | ABSENT       | N ONLY       | ABSENT       | ABSENT       | ABSENT       | ABSENT       | ABSENT       | ABSENT       |
| Q9UL25     | N Only       | 1            | T ONLY       | -2           | ABSENT       | -2           | ABSENT       | 1            | -1.125       | 1            |
| Q9UL26     | 2            | N ONLY       | T ONLY       | 2            | T ONLY       | ABSENT       | T ONLY       | ABSENT       | -1.5         | N ONLY       |
| Q9UL46     | T ONLY       | 1            | ABSENT       | ABSENT       | T ONLY       | 2            |
| Q9ULA0     | ABSENT       | T ONLY       | ABSENT       | T ONLY       | ABSENT       | ABSENT       | ABSENT       | N ONLY       | ABSENT       | ABSENT       |
| Q9ULB1     | ABSENT       | N ONLY       | ABSENT       | ABSENT       | ABSENT       | ABSENT       | ABSENT       | ABSENT       | N ONLY       | N ONLY       |
| Q9ULD0     | -3           | -5           | -3.00        | N ONLY       | -2           | N ONLY       | 1.33333333   | T ONLY       | T ONLY       | N ONLY       |
| Q9ULP9     | ABSENT       | ABSENT       | ABSENT       | ABSENT       | ABSENT       | N ONLY       | ABSENT       | 1            | ABSENT       | ABSENT       |
| Q9ULU8     | ABSENT       | N ONLY       | N ONLY       | T ONLY       | T ONLY       | N ONLY       | 2            | ABSENT       | N ONLY       | N ONLY       |
| Q9ULV0     | ABSENT       | N ONLY       | N ONLY       | ABSENT       | T ONLY       | N ONLY       | N ONLY       | N ONLY       | N ONLY       | 1            |
| Q9ULV4     | -2           | 1            | ABSENT       | ABSENT       | T ONLY       | T ONLY       | ABSENT       | 2            | ABSENT       | N ONLY       |
| Q9UM19     | N Only       | -3           | N ONLY       | N ONLY       | T ONLY       | -8           | -3           | N ONLY       | N ONLY       | N ONLY       |
| Q9UM22     | N Only       | N ONLY       | N ONLY       | T ONLY       | ABSENT       | N ONLY       | T ONLY       | ABSENT       | N ONLY       | N ONLY       |
| Q9UM54     | ABSENT       | 1            | T ONLY       | ABSENT       | ABSENT       | ABSENT       | ABSENT       | N ONLY       | ABSENT       | ABSENT       |
| Q9UMF0     | ABSENT       | ABSENT       | N ONLY       | N ONLY       | ABSENT       | ABSENT       | N ONLY       | ABSENT       | N ONLY       | N ONLY       |
| Q9UMS4     | ABSENT       | T ONLY       | ABSENT       |
| Q9UMY4     | N Only       | ABSENT       | ABSENT       | T ONLY       | ABSENT       | 1            | ABSENT       | T ONLY       | T ONLY       | N ONLY       |
| Q9UN36     | -3           | -1.5         | 1.00         | N ONLY       | N ONLY       | -1.5         | 1            | -2           | N ONLY       | -2           |
| Q9UNE7     | ABSENT       | ABSENT       | ABSENT       | ABSENT       | ABSENT       | ABSENT       | T ONLY       | ABSENT       | N ONLY       | N ONLY       |
| Q9UNF0     | ABSENT       | ABSENT       | ABSENT       | T ONLY       | ABSENT       | ABSENT       | ABSENT       | T ONLY       | ABSENT       | T ONLY       |
| Q9UNH7     | ABSENT       | ABSENT       | ABSENT       | N ONLY       | ABSENT       | ABSENT       | ABSENT       | N ONLY       | ABSENT       | ABSENT       |
| Q9UNM6     | 2            | N ONLY       | ABSENT       | T ONLY       | 2            | 1            | ABSENT       | 1            | N ONLY       | N ONLY       |
| Q9UNW9     | ABSENT       | T ONLY       | ABSENT       |
| Q9UNX3     | -2           | 2            | N ONLY       | T ONLY       | T ONLY       | 3            | ABSENT       | 1            | 6            | N ONLY       |
| Q9UNZ2     | N Only       | ABSENT       | ABSENT       | T ONLY       | ABSENT       | ABSENT       | N ONLY       | T ONLY       | -6           | ABSENT       |
| Q9UP95     | ABSENT       | ABSENT       | N ONLY       | N ONLY       | ABSENT       | N ONLY       | N ONLY       | ABSENT       | N ONLY       | N ONLY       |
| Q9UPA5     | ABSENT       | ABSENT       | N ONLY       | N ONLY       | ABSENT       | N ONLY       | N ONLY       | ABSENT       | N ONLY       | N ONLY       |
| Q9UPN3     | ABSENT       | ABSENT       | -2.00        | ABSENT       | ABSENT       | ABSENT       | 2            | ABSENT       | T ONLY       | N ONLY       |
| Q9UPQ0     | ABSENT       | N ONLY       | ABSENT       | ABSENT       |

| Protein ID | FC 104T/104N | FC 105T/105N | FC 106T/106N | FC 111T/111N | FC 112T/112N | FC 121T/121N | FC 347T/347N | FC 353T/353N | FC 563T/563N | FC 537T/537N |
|------------|--------------|--------------|--------------|--------------|--------------|--------------|--------------|--------------|--------------|--------------|
| Q9UPR5     | ABSENT       | ABSENT       | N ONLY       | N ONLY       | ABSENT       | N ONLY       | N ONLY       | ABSENT       | N ONLY       | N ONLY       |
| Q9UPT6     | ABSENT       | N ONLY       | ABSENT       | ABSENT       |
| Q9UPV7     | ABSENT       | ABSENT       | ABSENT       | N ONLY       | ABSENT       | N ONLY       | N ONLY       | ABSENT       | N ONLY       | 1            |
| Q9UPY8     | N Only       | -5           | -5.00        | -4           | -2           | -3           | -1.3333333   | -2           | -6           | -1.75        |
| Q9UQ16     | -1.75        | -5           | -6.75        | -5           | -2.3333333   | -21          | -1.25        | -6           | -54          | -7.875       |
| Q9UQ80     | 1            | T ONLY       | ABSENT       | 5.5          | T ONLY       | 3            | 1            | 1            | N ONLY       | ABSENT       |
| Q9UQB3     | -2           | ABSENT       | 1.00         | ABSENT       | ABSENT       | ABSENT       | N ONLY       | ABSENT       | T ONLY       | N ONLY       |
| Q9UQB8     | ABSENT       | ABSENT       | ABSENT       | ABSENT       | ABSENT       | N ONLY       | ABSENT       | ABSENT       | N ONLY       | N ONLY       |
| Q9UQE7     | 1            | T ONLY       | ABSENT       | T ONLY       | ABSENT       | T ONLY       | T ONLY       | T ONLY       | ABSENT       | ABSENT       |
| Q9UQM7     | N Only       | -5           | -33.50       | -13          | N ONLY       | N ONLY       | -16          | -1.5         | -151.5       | N ONLY       |
| Q9Y224     | -4           | 1.5          | 2.00         | ABSENT       | ABSENT       | 3            | N ONLY       | T ONLY       | N ONLY       | -2           |
| Q9Y230     | 4            | T ONLY       | ABSENT       | T ONLY       | T ONLY       | T ONLY       | T ONLY       | 1            | T ONLY       | ABSENT       |
| Q9Y262     | ABSENT       | T ONLY       | ABSENT       | T ONLY       | ABSENT       | ABSENT       | T ONLY       | N ONLY       | N ONLY       | ABSENT       |
| Q9Y265     | T ONLY       | 1            | ABSENT       | T ONLY       | T ONLY       | T ONLY       | T ONLY       | 3            | N ONLY       | T ONLY       |
| Q9Y266     | ABSENT       | T ONLY       | ABSENT       | T ONLY       | 1            | 4            | ABSENT       | T ONLY       | ABSENT       | N ONLY       |
| Q9Y276     | ABSENT       |
| Q9Y277     | -3.5         | -2.75        | -2.50        | -2.3333333   | 2.5          | -4           | -2           | N ONLY       | -2.8333333   | -10          |
| Q9Y281     | 1.44444444   | 1.13333333   | 1.40         | 2.30769231   | 1.18181818   | 1.19047619   | 1            | 1.88888889   | -1.6071429   | -2.3333333   |
| Q9Y285     | ABSENT       | T ONLY       | ABSENT       | T ONLY       | ABSENT       | -1.5         | 1.5          | ABSENT       | N ONLY       | 2            |
| Q9Y295     | N Only       | T ONLY       | ABSENT       | ABSENT       |
| Q9Y2A7     | -1.5         | 2            | N ONLY       | 1            | 1            | -2.3333333   | 1.66666667   | 2            | -6           | N ONLY       |
| Q9Y2D4     | ABSENT       | N ONLY       | T ONLY       | T ONLY       | T ONLY       | N ONLY       | T ONLY       | T ONLY       | ABSENT       | ABSENT       |
| Q9Y2J0     | N Only       | N ONLY       | N ONLY       | N ONLY       | ABSENT       | N ONLY       | N ONLY       | ABSENT       | N ONLY       | N ONLY       |
| Q9Y2J2     | -2           | N ONLY       | 1.25         | -5.5         | -3           | -2           | -1.2         | 1            | -21          | -5.6666667   |
| Q9Y2J8     | 1.42857143   | N ONLY       | 4.50         | 3.2          | 2.14285714   | -4           | 9.5          | -1.625       | 4.11111111   | 1.23076923   |
| Q9Y2Q0     | ABSENT       | N ONLY       | N ONLY       | ABSENT       | ABSENT       | N ONLY       | N ONLY       | ABSENT       | N ONLY       | N ONLY       |
| Q9Y2Q3     | 2            | 1            | ABSENT       | T ONLY       | T ONLY       | T ONLY       | T ONLY       | 3            | -1.5         | 2            |
| Q9Y2R0     | T ONLY       | ABSENT       | N ONLY       | ABSENT       | T ONLY       | -3           | T ONLY       | 1            | ABSENT       | ABSENT       |
| Q9Y2R9     | ABSENT       | T ONLY       | ABSENT       | ABSENT       |
| Q9Y2S2     | -3           | -3           | 7.00         | -1.6666667   | -2.5         | T ONLY       | T ONLY       | -1.25        | 2.22222222   | -1.3333333   |
| Q9Y2S6     | N Only       | T ONLY       | ABSENT       | T ONLY       | ABSENT       | T ONLY       | T ONLY       | 1            | ABSENT       | ABSENT       |
| Q9Y2S7     | ABSENT       | T ONLY       | ABSENT       |
| Q9Y2T3     | T ONLY       | ABSENT       | N ONLY       | N ONLY       | N ONLY       | -5           | N ONLY       | N ONLY       | N ONLY       | N ONLY       |
| Q9Y2W1     | T ONLY       | ABSENT       | ABSENT       | T ONLY       | ABSENT       | ABSENT       | ABSENT       | T ONLY       | ABSENT       | T ONLY       |
| Q9Y2X3     | N Only       | T ONLY       | ABSENT       | ABSENT       | ABSENT       | ABSENT       | ABSENT       | T ONLY       | ABSENT       | N ONLY       |
| Q9Y2Z0     | ABSENT       | N ONLY       | N ONLY       |
| Q9Y305     | ABSENT       | N ONLY       | ABSENT       | ABSENT       | ABSENT       | ABSENT       | N ONLY       | ABSENT       | N ONLY       | ABSENT       |
| Q9Y371     | ABSENT       | ABSENT       | ABSENT       | T ONLY       | N ONLY       | ABSENT       | ABSENT       | 1            | ABSENT       | ABSENT       |
| Q9Y376     | -1.5         | N ONLY       | N ONLY       | N ONLY       | ABSENT       | N ONLY       | 3            | N ONLY       | N ONLY       | ABSENT       |
| Q9Y383     | ABSENT       | T ONLY       | ABSENT       | T ONLY       | ABSENT       | ABSENT       | ABSENT       | ABSENT       | ABSENT       | ABSENT       |
| Q9Y3A5     | N Only       | 1.5          | T ONLY       | 1            | T ONLY       | T ONLY       | T ONLY       | -1.5         | T ONLY       | 2            |
| Q9Y3C8     | -1.5         | N ONLY       | N ONLY       | T ONLY       | ABSENT       | T ONLY       | ABSENT       | T ONLY       | T ONLY       | N ONLY       |
| Q9Y3D6     | 2            | -4           | -2.00        | -2           | 1            | 1            | 2            | -2           | N ONLY       | -1.5         |
| Q9Y3F4     | -2           | 1            | ABSENT       | ABSENT       | N ONLY       | -2           | ABSENT       | N ONLY       | N ONLY       | ABSENT       |
| Q9Y3I0     | 1.5          | T ONLY       | T ONLY       | T ONLY       | ABSENT       | 1            | 2            | 1.75         | ABSENT       | 1            |
| Q9Y3L5     | N Only       | N ONLY       | -6.00        | 1.5          | N ONLY       | -5           | 1            | N ONLY       | -10.5        | -2.5         |
| Q9Y3U8     | 3            | 1            | ABSENT       | T ONLY       | T ONLY       | T ONLY       | N ONLY       | T ONLY       | ABSENT       | ABSENT       |
| Q9Y3Y2     | -2           | T ONLY       | ABSENT       | ABSENT       |
| Q9Y3Z3     | ABSENT       | ABSENT       | ABSENT       | T ONLY       | ABSENT       | ABSENT       | ABSENT       | 2            | ABSENT       | ABSENT       |
| Q9Y490     | 11.5         | -1.1666667   | T ONLY       | 25           | 1.6          | T ONLY       | T ONLY       | 3            | 18           | -3           |
| Q9Y496     | ABSENT       | ABSENT       | N ONLY       | T ONLY       | ABSENT       | ABSENT       | ABSENT       | ABSENT       | ABSENT       | ABSENT       |
| Q9Y4C0     | ABSENT       | ABSENT       | ABSENT       | ABSENT       | ABSENT       | N ONLY       | ABSENT       | ABSENT       | N ONLY       | ABSENT       |
| Q9Y4E6     | ABSENT       | ABSENT       | ABSENT       | ABSENT       | ABSENT       | N ONLY       | N ONLY       | ABSENT       | ABSENT       | N ONLY       |
| Q9Y4F1     | 2            | T ONLY       | T ONLY       | ABSENT       |
| Q9Y4G6     | 2            | -3           | -2.00        | 4            | T ONLY       | -5           | 1            | 1            | -2.25        | N ONLY       |
| Q9Y4I1     | T ONLY       | N ONLY       | N ONLY       | N ONLY       | 1            | N ONLY       | -3.6666667   | N ONLY       | N ONLY       | -2           |
| Q9Y4J8     | N Only       | ABSENT       | T ONLY       | ABSENT       | ABSENT       | ABSENT       | ABSENT       | T ONLY       | ABSENT       | ABSENT       |
| Q9Y4L1     | -1.6666667   | 1            | 2.00         | T ONLY       | N ONLY       | T ONLY       | T ONLY       | T ONLY       | 2            | T ONLY       |
| Q9Y4W6     | ABSENT       | T ONLY       | N ONLY       | N ONLY       | ABSENT       | N ONLY       | 5            | ABSENT       | N ONLY       | N ONLY       |
| Q9Y4Z0     | -3           | T ONLY       | ABSENT       | T ONLY       | ABSENT       | T ONLY       | T ONLY       | T ONLY       | ABSENT       | ABSENT       |
| Q9Y512     | N Only       | T ONLY       | ABSENT       | ABSENT       | ABSENT       | ABSENT       | T ONLY       | ABSENT       | ABSENT       | N ONLY       |
| Q9Y5B9     | T ONLY       | T ONLY       | ABSENT       | T ONLY       | ABSENT       | ABSENT       | ABSENT       | T ONLY       | ABSENT       | ABSENT       |

| Protein ID | FC<br>104T/104N | FC<br>105T/105N | FC<br>106T/106N | FC<br>111T/111N | FC<br>112T/112N | FC<br>121T/121N | FC<br>347T/347N | FC<br>353T/353N | FC<br>563T/563N | FC<br>537T/537N |
|------------|-----------------|-----------------|-----------------|-----------------|-----------------|-----------------|-----------------|-----------------|-----------------|-----------------|
| Q9Y5K8     | T ONLY          | ABSENT          | N ONLY          | ABSENT          | ABSENT          | N ONLY          |
| Q9Y5L4     | 1               | ABSENT          | ABSENT          | ABSENT          | ABSENT          | ABSENT          | T ONLY          | T ONLY          | ABSENT          | ABSENT          |
| Q9Y5M8     | T ONLY          | T ONLY          | ABSENT          | T ONLY          | ABSENT          | ABSENT          | ABSENT          | T ONLY          | ABSENT          | ABSENT          |
| Q9Y5P6     | ABSENT          | T ONLY          | ABSENT          | ABSENT          | ABSENT          | T ONLY          | ABSENT          | ABSENT          | ABSENT          | ABSENT          |
| Q9Y5S2     | ABSENT          | N ONLY          | ABSENT          |
| Q9Y5S9     | 1               | N ONLY          | N ONLY          | T ONLY          | T ONLY          | T ONLY          | T ONLY          | ABSENT          | N ONLY          | N ONLY          |
| Q9Y5X3     | ABSENT          | ABSENT          | ABSENT          | T ONLY          | ABSENT          | T ONLY          | ABSENT          | T ONLY          | ABSENT          | ABSENT          |
| Q9Y5Z4     | N Only          | 1               | ABSENT          | ABSENT          | ABSENT          | T ONLY          | ABSENT          | T ONLY          | ABSENT          | ABSENT          |
| Q9Y617     | -1.1111111      | 3.11764706      | 4.67            | 1.75            | 1.3             | 4.6             | 5.2             | 2.71428571      | 1.11111111      | 2               |
| Q9Y623     | ABSENT          | ABSENT          | ABSENT          | N ONLY          | ABSENT          | ABSENT          | ABSENT          | ABSENT          | ABSENT          | ABSENT          |
| Q9Y639     | ABSENT          | ABSENT          | ABSENT          | N ONLY          | ABSENT          | N ONLY          | N ONLY          | ABSENT          | N ONLY          | N ONLY          |
| Q9Y678     | T ONLY          | ABSENT          | ABSENT          | ABSENT          | ABSENT          | ABSENT          | T ONLY          | ABSENT          | ABSENT          | ABSENT          |
| Q9Y696     | N Only          | 1               | 2.00            | -1.4            | 1               | 4               | T ONLY          | 1.66666667      | 2.33333333      | N ONLY          |
| Q9Y6A4     | T ONLY          | N ONLY          | T ONLY          | T ONLY          | ABSENT          | ABSENT          | ABSENT          | ABSENT          | ABSENT          | ABSENT          |
| Q9Y6B6     | 1               | 2               | -1.50           | 1.75            | 1               | -1.5            | -2              | ABSENT          | -1.5            | 1               |
| Q9Y6C2     | ABSENT          | T ONLY          | ABSENT          |
| Q9Y6C9     | N Only          | N ONLY          | 1.00            | 1               | 1               | -2              | 1               | 1               | -3              | 4               |
| Q9Y6I3     | ABSENT          | ABSENT          | N ONLY          | ABSENT          | ABSENT          | ABSENT          | T ONLY          | ABSENT          | N ONLY          | N ONLY          |
| Q9Y6K8     | 1               | 1               | 2.33            | T ONLY          | 3               | 2               | 3               | T ONLY          | -1.125          | -1.25           |
| Q9Y6N5     | ABSENT          |
| Q9Y6N6     | ABSENT          |
| Q9Y6R1     | N Only          | N ONLY          | N ONLY          | N ONLY          | ABSENT          | N ONLY          | N ONLY          | ABSENT          | N ONLY          | N ONLY          |
| Q9Y6R7     | T ONLY          | ABSENT          | ABSENT          | T ONLY          | T ONLY          | T ONLY          | ABSENT          | T ONLY          | T ONLY          | ABSENT          |
| Q9Y6U3     | ABSENT          | ABSENT          | ABSENT          | T ONLY          | T ONLY          | ABSENT          | ABSENT          | T ONLY          | T ONLY          | ABSENT          |
| Q9Y6X4     | ABSENT          | T ONLY          | ABSENT          | ABSENT          | ABSENT          | ABSENT          | ABSENT          | T ONLY          | ABSENT          | N ONLY          |
