# Supplementary material
Source: PubMed Central journal article supplement (PMC4028366)
Supplement: NIHMS545812-supplement-401_2013_1218_MOESM4_ESM.pdf [file NIHMS545812-supplement-401_2013_1218_MOESM4_ESM.pdf]

Authors: Amanda M. Saratsis, Madhuri Kambhampati, Kendall Snyder, Sri devi Yadavilli, Joe Devaney,  
Brennan Harmon, Jordan Hall, Eric H. Raabe, Ping An, Melanie Weingart, Brian Rood, Suresh Magge, Roger J. Packer, Javad Nazarian

Corresponding Author:

Javad Nazarian, Children's National Medical Center, Center for Genetic Medicine  
111 Michigan Ave., NW, Washington DC, 20010  
Phone: 202-476-6022 Fax: 202-476-6014  
Email: J.Nazarian@CNMC.org

Table with columns: Protein ID, p-value (Group), p-value (1 vs. 2), MeanRatio (1 vs. 2), FoldChange (1 vs. 2), FoldChange (1 vs. 2) (Description), Estimate (1 vs. 2), F(1 vs. 2), T(1 vs. 2), F(Group), SS(Group), SS(Error), F(Error). Rows list various protein IDs such as O43175, O60664, O75051, etc., along with their corresponding values for each column.
