# Supplementary material
Source: PubMed Central journal article supplement (PMC4028366)
Supplement: NIHMS545812-supplement-401_2013_1218_MOESM5_ESM.pdf [file NIHMS545812-supplement-401_2013_1218_MOESM5_ESM.pdf]

File: ESM\_5 (Online Resource 5)

**Manuscript Title:** Comparative Multidimensional Molecular Analyses of Pediatric Diffuse Intrinsic Pontine Glioma Reveals Distinct Molecular Subtypes

**Journal:** Acta Neuropathologica

**Authors:** Amanda M. Saratsis, Madhuri Kamthampati, Kendall Snyder, Srivedi Yadavilli, Joe Devaney, Brennan Harmon, Jordan Hall, Eric H. Raabe, Ping An, Melanie Weingart, Brian Rood, Suresh Magge, Roger J. Packer, Javad Nazarian

**Corresponding Author:**

Javad Nazarian, Children's National Medical Center, Center for Genetic Medicine

111 Michigan Ave., NW, Washington DC, 20010

Phone: 202-476-6022 Fax: 202-476-6014

Email: JNazarian@CNMC.org

| DIPG Fresh Tissue Proteome (Protein IDs) |        |        |        |        |        |        |        |        |        |        |        |        |        |        |        |        |        |        |        |        |  |  |  |
|------------------------------------------|--------|--------|--------|--------|--------|--------|--------|--------|--------|--------|--------|--------|--------|--------|--------|--------|--------|--------|--------|--------|--|--|--|
| A0AVT1                                   | O43447 | O94760 | P02655 | P07437 | P11908 | P17858 | P25786 | P35221 | P46777 | P52788 | P61956 | P98179 | Q13185 | Q15121 | Q5V2M2 | Q8NHG7 | Q96199 | Q9H008 | Q9NZM1 | Q9Y277 |  |  |  |
| A0M266                                   | O43464 | O94819 | P02671 | P07451 | P11940 | P17931 | P25787 | P35222 | P46778 | P52789 | P61978 | P99999 | Q13200 | Q15126 | Q5XKE5 | Q8NHW5 | Q961U4 | Q9H061 | Q9NZN3 | Q9Y281 |  |  |  |
| ASA5E0                                   | O43488 | O94826 | P02675 | P07585 | P12004 | P17980 | P25788 | P35232 | P46779 | P52815 | P61981 | Q00056 | Q13228 | Q15149 | Q6G6S9 | Q8TAM6 | Q961X5 | Q9H0Q0 | Q9NZR1 | Q9Y285 |  |  |  |
| ASYM72                                   | O43491 | O94832 | P02679 | P07602 | P12035 | P17987 | P25789 | P35237 | P46781 | P52888 | P62081 | Q00059 | Q13232 | Q15181 | Q6BCY4 | Q8TAQ2 | Q961E9 | Q9H0R4 | Q9NZT1 | Q9Y295 |  |  |  |
| A6NCN2                                   | O43592 | O94856 | P02686 | P07686 | P12036 | P18085 | P26006 | P35241 | P46783 | P52895 | P62136 | Q00169 | Q13242 | Q15185 | Q6DN03 | Q8TB36 | Q96K76 | Q9H0U4 | Q9NZW5 | Q9Y2A7 |  |  |  |
| A6NE02                                   | O43602 | O94874 | P02689 | P07737 | P12081 | P18124 | P26038 | P35268 | P46821 | P53004 | P62140 | Q00325 | Q13243 | Q15233 | Q6IA69 | Q8TC12 | Q96K94 | Q9H115 | Q9P000 | Q9Y2D4 |  |  |  |
| A6NEC2                                   | O43615 | O94903 | P02730 | P07738 | P12109 | P18206 | P26196 | P35520 | P46926 | P53007 | P62158 | Q00341 | Q13247 | Q15257 | Q6IAA8 | Q8TCU6 | Q96L21 | Q9H1E3 | Q9P0J0 | Q9Y2J2 |  |  |  |
| A6NHL2                                   | O43617 | O94905 | P02735 | P07741 | P12110 | P18509 | P26232 | P35527 | P46940 | P53041 | P62166 | Q00535 | Q13263 | Q15274 | Q6KB66 | Q8TD22 | Q96L92 | Q9H1K4 | Q9P0K1 | Q9Y2J8 |  |  |  |
| A6NL28                                   | O43665 | O94906 | P02741 | P07814 | P12111 | P18621 | P26358 | P35542 | P46976 | P53396 | P62191 | Q00577 | Q13310 | Q15286 | Q6NVY1 | Q8TD47 | Q96MM6 | Q9H254 | Q9P0L0 | Q9Y2Q3 |  |  |  |
| A6NMW6                                   | O43676 | O94919 | P02743 | P07900 | P12235 | P18669 | P26373 | P35555 | P46977 | P53597 | P62195 | Q00610 | Q13336 | Q15334 | Q6NZI2 | Q8TDQ7 | Q96P70 | Q9H299 | Q9P0M6 | Q9Y2R0 |  |  |  |
| ABMWD9                                   | O43678 | O94925 | P02747 | P07910 | P12236 | P18887 | P26440 | P35573 | P47755 | P53618 | P62241 | Q00688 | Q13347 | Q15363 | Q6P1N0 | Q8TD22 | Q96PE3 | Q9H2D6 | Q9P121 | Q9Y2R9 |  |  |  |
| B2RPK0                                   | O43681 | O94973 | P02748 | P07947 | P12268 | P19012 | P26447 | P35579 | P47756 | P53621 | P62244 | Q00765 | Q13363 | Q15365 | Q6P2Q9 | Q8TEA8 | Q96PK2 | Q9H2H8 | Q9P1U1 | Q9Y2S2 |  |  |  |
| Q00139                                   | O43684 | O94979 | P02749 | P07951 | P12270 | P19013 | P26583 | P35580 | P47870 | P53675 | P62249 | Q00796 | Q13367 | Q15366 | Q6PCE3 | Q8TEM1 | Q96PK6 | Q9H2M9 | Q9P2S8 | Q9Y2S6 |  |  |  |
| Q00142                                   | O43707 | O94985 | P02750 | P07954 | P12277 | P19086 | P26599 | P35606 | P47897 | P53999 | P62258 | Q00839 | Q13404 | Q15370 | Q6PIA8 | Q8WUD1 | Q96PU8 | Q9H2U2 | Q9P2R2 | Q9Y2S7 |  |  |  |
| Q00148                                   | O43747 | O95057 | P02751 | P08107 | P12429 | P19105 | P26639 | P35609 | P47929 | P54136 | P62263 | Q01082 | Q13409 | Q15382 | Q6PI78 | Q8WUM4 | Q96PY5 | Q9H307 | Q9P2E9 | Q9Y2T3 |  |  |  |
| Q00151                                   | O43759 | O95168 | P02763 | P08123 | P12532 | P19338 | P26640 | P35611 | P47985 | P54289 | P62266 | Q01105 | Q13423 | Q15393 | Q6PIU2 | Q8WVC6 | Q96QK1 | Q9H361 | Q9P2J5 | Q9Y2W1 |  |  |  |
| Q00154                                   | O43760 | O95182 | P02766 | P08133 | P12814 | P19367 | P26641 | P35612 | P48047 | P54577 | P62269 | Q01469 | Q13435 | Q15404 | Q6UVK1 | Q8WVJ2 | Q96Q8R | Q9H3N1 | Q9P2K5 | Q9Y2X3 |  |  |  |
| Q00161                                   | O43761 | O95197 | P02768 | P08185 | P12883 | P19404 | P26885 | P35613 | P48163 | P54578 | P62277 | Q01484 | Q13442 | Q15417 | Q6UWR7 | Q8WVW9 | Q96RP9 | Q9H3S7 | Q9P2R3 | Q9Y305 |  |  |  |
| Q00203                                   | O43765 | O95202 | P02786 | P08195 | P12931 | P19623 | P27105 | P35637 | P48444 | P54677 | P62280 | Q01518 | Q13449 | Q15424 | Q6UXV4 | Q8WVW5 | Q96S99 | Q9H425 | Q9P2R7 | Q9Y371 |  |  |  |
| Q00231                                   | O43768 | O95292 | P02787 | P08237 | P12955 | P19652 | P27144 | P35659 | P48449 | P54652 | P62304 | Q01546 | Q13451 | Q15435 | Q6YN16 | Q8WVY3 | Q96TA1 | Q9H444 | Q9UB84 | Q9Y376 |  |  |  |
| Q00232                                   | O43776 | O95298 | P02788 | P08238 | P12956 | P19784 | P27338 | P35749 | P48506 | P54687 | P62308 | Q01581 | Q13464 | Q15436 | Q6ZU65 | Q8WXF7 | Q96TC7 | Q9H479 | Q9UB86 | Q9Y383 |  |  |  |
| Q00233                                   | O43809 | O95299 | P02790 | P08247 | P13010 | P19823 | P27348 | P35754 | P48556 | P54709 | P62312 | Q01813 | Q13492 | Q15437 | Q71U19 | Q8WXH0 | Q99426 | Q9H493 | Q9UBE0 | Q9Y3A5 |  |  |  |
| Q00264                                   | O43813 | O95336 | P02792 | P08559 | P13073 | P19827 | P27361 | P35900 | P48637 | P54727 | P62316 | Q01814 | Q13509 | Q15459 | Q7KZ4F | Q8WZ42 | Q99436 | Q9H4A4 | Q9UBI6 | Q9Y3C8 |  |  |  |
| Q00291                                   | O43837 | O95347 | P02794 | P08572 | P13521 | P19971 | P27635 | P35908 | P48643 | P54819 | P62318 | Q01995 | Q13510 | Q15493 | Q7LO99 | Q8WZ49 | Q99442 | Q9H4B7 | Q9UBL6 | Q9Y3D6 |  |  |  |
| Q00299                                   | O43852 | O95372 | P04003 | P08574 | P13533 | P20020 | P27694 | P35998 | P48668 | P54886 | P62330 | Q02153 | Q13554 | Q15555 | Q7L1Q6 | Q92499 | Q99456 | Q9H4G4 | Q9UBQ0 | Q9Y3F4 |  |  |  |
| Q00303                                   | O43865 | O95373 | P04004 | P08603 | P13591 | P20042 | P27695 | P36222 | P48681 | P54920 | P62333 | Q02156 | Q13555 | Q15582 | Q7L266 | Q92506 | Q99459 | Q9H4M9 | Q9UBQ7 | Q9Y3J0 |  |  |  |
| Q00330                                   | O43920 | O95563 | P04040 | P08670 | P13611 | P20073 | P27708 | P36269 | P48735 | P55011 | P62424 | Q02218 | Q13557 | Q15631 | Q7L2E3 | Q92520 | Q99460 | Q9H7C9 | Q9UBR2 | Q9Y3L5 |  |  |  |
| Q00339                                   | O60220 | O95613 | P04075 | P08708 | P13637 | P20338 | P27797 | P36404 | P48739 | P55060 | P62491 | Q02246 | Q13561 | Q7L523 | Q92522 | Q99471 | Q9H7Z7 | Q9UB87 | Q9Y3U8 |        |  |  |  |
| Q00410                                   | O60256 | O95670 | P04080 | P08727 | P13639 | P20339 | P27816 | P36405 | P48741 | P55072 | P62495 | Q02252 | Q13576 | Q15714 | Q7L576 | Q92526 | Q99497 | Q9H845 | Q9UBW5 | Q9Y3Y2 |  |  |  |
| Q00425                                   | O60264 | O95678 | P04083 | P08754 | P13645 | P20340 | P27824 | P36507 | P49006 | P55084 | P62701 | Q02338 | Q13596 | Q15717 | Q7LSN1 | Q92542 | Q99536 | Q9H856 | Q9UBW8 | Q9Y3Z3 |  |  |  |
| Q00429                                   | O60282 | O95721 | P04114 | P08758 | P13646 | P20591 | P28062 | P36542 | P49189 | P55087 | P62714 | Q02539 | Q13617 | Q15738 | Q7Z381 | Q92572 | Q99584 | Q9H984 | Q9UDR5 | Q9Y490 |  |  |  |
| Q00445                                   | O60313 | O95741 | P04156 | P08779 | P13647 | P20618 | P28065 | P36543 | P49207 | P55145 | P62750 | Q02543 | Q13618 | Q15746 | Q7Z3D6 | Q92598 | Q99598 | Q9H9H5 | Q9UDT6 | Q9Y496 |  |  |  |
| Q00468                                   | O60493 | O95747 | P04179 | P08865 | P13667 | P20648 | P28066 | P36578 | P49321 | P55209 | P62763 | Q02750 | Q13620 | Q15811 | Q7Z3Y8 | Q92599 | Q99613 | Q9H9S4 | Q9UDY2 | Q9Y4F1 |  |  |  |
| Q00483                                   | O60506 | O95757 | P04181 | P08962 | P13671 | P20671 | P28072 | P36776 | P49327 | P55265 | P62760 | Q02750 | Q13630 | Q15819 | Q7Z4Q6 | Q92616 | Q99623 | Q9H9V0 | Q9UDY4 | Q9Y4G6 |  |  |  |
| Q00499                                   | O60568 | O95782 | P04208 | P09104 | P13693 | P20674 | P28074 | P36871 | P49368 | P55268 | P62805 | Q02818 | Q13636 | Q15907 | Q7Z4S6 | Q92621 | Q99653 | Q9H9V4 | Q9UEU8 | Q9Y4I1 |  |  |  |
| Q00533                                   | O60641 | O95817 | P04217 | P09110 | P13716 | P20700 | P28161 | P36873 | P49411 | P55327 | P62820 | Q02878 | Q13642 | Q15942 | Q7Z4W1 | Q92686 | Q99685 | Q9H9V7 | Q9UEV0 | Q9Y4J8 |  |  |  |
| Q00534                                   | O60664 | O95831 | P04259 | P09122 | P13746 | P20742 | P28331 | P36955 | P49418 | P55735 | P62826 | Q02880 | Q13740 | Q16134 | Q7Z6L0 | Q92688 | Q99714 | Q9H807 | Q9UH03 | Q9Y4L1 |  |  |  |
| Q00567                                   | O60701 | O95837 | P04264 | P09131 | P13760 | P20774 | P28370 | P36957 | P49419 | P55769 | P62829 | Q02952 | Q13765 | Q16143 | Q7Z6Z7 | Q92752 | Q99715 | Q9H871 | Q9UH99 | Q9Y4W6 |  |  |  |
| Q00571                                   | O60749 | O95861 | P04275 | P09234 | P13761 | P20916 | P28482 | P36959 | P49448 | P55786 | P62834 | Q02978 | Q13813 | Q16181 | Q7Z794 | Q92764 | Q99719 | Q9H8A9 | Q9UH86 | Q9Y4Z0 |  |  |  |
| Q00625                                   | O60762 | O95865 | P04350 | P09382 | P13796 | P20962 | P28838 | P36969 | P49588 | P55809 | P62841 | Q03001 | Q13825 | Q16352 | Q86SK9 | Q92769 | Q99729 | Q9H8C8 | Q9UH89 | Q9Y512 |  |  |  |
| Q00764                                   | O60763 | O96000 | P04406 | P09417 | P13797 | P21266 | P28907 | P37108 | P49589 | P55884 | P62847 | Q03135 | Q13838 | Q16363 | Q86T65 | Q92783 | Q99733 | Q9H8C6 | Q9UH08 | Q9Y589 |  |  |  |
| Q14495                                   | O60784 | O96008 | P04439 | P09429 | P13798 | P21281 | P29144 | P37235 | P49590 | P55914 | P62851 | Q03252 | Q13867 | Q16527 | Q86TK2 | Q92804 | Q99747 | Q9H8C0 | Q9UH62 | Q9Y5K8 |  |  |  |
| Q14531                                   | O60812 | O96019 | P04632 | P09455 | P13804 | P21283 | P29218 | P37802 | P49591 | P56192 | P62857 | Q04609 | Q13885 | Q16531 | Q86UE4 | Q92820 | Q99798 | Q9H8C6 | Q9UH14 | Q9Y5L4 |  |  |  |
| Q14558                                   | O60825 | P00338 | P04792 | P09471 | P13861 | P21291 | P29401 | P37837 | P49721 | P56121 | P62861 | Q04695 | Q13938 | Q16543 | Q86UP2 | Q92823 | Q99829 | Q9H8C2 | Q9UH10 | Q9Y5M8 |  |  |  |
| Q14561                                   | O60832 | P00352 | P04843 | P09486 | P14136 | P21333 | P29692 | P37840 | P49736 | P56385 | P62888 | Q04760 | Q14008 | Q16555 | Q86V13 | Q92841 | Q99832 | Q9HD33 | Q9UHV9 | Q9Y5P6 |  |  |  |
| Q14576                                   | O60925 | P00367 | P04899 | P09488 | P14314 | P21397 | P29762 | P38117 | P49748 | P56537 | P62899 | Q04837 | Q14011 | Q16576 | Q86VP6 | Q92878 | Q99873 | Q9HDQ3 | Q9UHK1 | Q9Y5S9 |  |  |  |
| Q14578                                   | O75044 | P00387 | P05023 | P09493 | P14324 | P21399 | P29966 | P38159 | P49753 | P56545 | P62906 | Q04917 | Q14019 | Q16623 | Q86X76 | Q92900 | Q99961 | Q9NNW7 | Q9UHT7 | Q9Y5X3 |  |  |  |
| Q14594                                   | O75061 | P00390 | P05026 | P09496 | P14415 | P21579 | P29992 | P38405 | P49755 | P56556 | P62913 | Q05086 | Q14103 | Q16629 | Q86XP3 | Q92905 | Q99962 | Q9PNP2 | Q9UI09 | Q9Y5Z4 |  |  |  |
| Q14617                                   | O75083 | P00403 | P05090 | P09497 | P14543 | P21695 | P30038 | P38606 | P49770 | P57088 | P62917 | Q05193 | Q14108 | Q16630 | Q86Y39 | Q92930 | Q99966 | Q9PNP6 | Q9UI12 | Q9Y617 |  |  |  |
| Q14735                                   | O75116 | P00441 | P05091 | P09525 | P14550 | P21796 | P30040 | P38646 | P49773 | P57737 | P62937 | Q05586 | Q14112 | Q16653 | Q86Y46 | Q92945 | Q99967 | Q9PNP8 | Q9UI15 | Q9     |  |  |  |
