# Supplementary material
Source: PubMed Central journal article supplement (PMC4028366)
Supplement: NIHMS545812-supplement-401_2013_1218_MOESM7_ESM.pdf [file NIHMS545812-supplement-401_2013_1218_MOESM7_ESM.pdf]

**File:** ESM\_7 (Online Resource 7)

**Manuscript Title:** Comparative Multidimensional Molecular Analyses of Pediatric Diffuse Intrinsic Pontine Glioma Reveals Distinct Molecular Subtypes

**Journal:** Acta Neuropathologica

**Authors:** Amanda M. Saratsis, Madhuri Kambhampati, Kendall Snyder, Sridevi Yadavilli , Joe Devaney, Brennan Harmon, Jordan Hall, Eric H. Raabe, Ping An, Melanie Weingart, Brian Rood, Suresh Magge, Roger J. Packer, Javad Nazarian

**Corresponding Author:**

Javad Nazarian

Children's National Medical Center, Center for Genetic Medicine

111 Michigan Ave., NW, Washington DC, 20010

Phone: 202-476-6022 Fax: 202-476-6014

Email: JNazarian@CNMC.org

| <b>Gene ID</b> | <b>p-value (Dx)</b> | <b>MeanRatio (DIPG vs. Astrocytoma and Ependymoma and Glioneural Tumor and JPA and Medulloblastoma and Meningioma)</b> | <b>FoldChange (DIPG vs. Astrocytoma and Ependymoma and Glioneural Tumor and JPA and Medulloblastoma and Meningioma)</b> | <b>F(Dx)</b> | <b>SS(Dx)</b> | <b>SS (Error)</b> | <b>F (Error)</b> |
|----------------|---------------------|------------------------------------------------------------------------------------------------------------------------|-------------------------------------------------------------------------------------------------------------------------|--------------|---------------|-------------------|------------------|
| DNASE1L3       | 9.51E-21            | 0.0107371                                                                                                              | -93.1353                                                                                                                | 420.233      | 3352.8        | 27.9245           | 1                |
| TPR            | 1.93E-18            | 0.123307                                                                                                               | -8.10983                                                                                                                | 251.738      | 3918.02       | 54.4736           | 1                |
| PRG4           | 2.92E-18            | -0.0738187                                                                                                             | -13.5467                                                                                                                | 241.866      | 1874.22       | 27.1214           | 1                |
| CFH            | 6.88E-18            | -0.03949                                                                                                               | -25.3229                                                                                                                | 222.556      | 3692.46       | 58.069            | 1                |
| CPA4           | 7.02E-18            | 0.0731715                                                                                                              | -13.6665                                                                                                                | 222.128      | 1615.5        | 25.455            | 1                |
| SCARA5         | 2.30E-17            | 0.0174505                                                                                                              | -57.3049                                                                                                                | 197.913      | 1431.8        | 25.3208           | 1                |
| PRG4           | 2.75E-17            | -0.00871078                                                                                                            | -114.8                                                                                                                  | 194.552      | 1588.06       | 28.5692           | 1                |
| LOC645638      | 3.01E-17            | 0.0314382                                                                                                              | -31.8084                                                                                                                | 192.824      | 1540.75       | 27.9667           | 1                |
| OGN            | 5.29E-17            | -0.0284055                                                                                                             | -35.2045                                                                                                                | 182.552      | 2071.79       | 39.7218           | 1                |
| OMD            | 2.47E-15            | -0.0333182                                                                                                             | -30.0136                                                                                                                | 125.306      | 1561.39       | 43.6123           | 1                |
| CFH            | 6.57E-15            | -0.0713125                                                                                                             | -14.0228                                                                                                                | 113.796      | 1918.27       | 58.9999           | 1                |
| KIAA1199       | 7.11E-15            | -0.177884                                                                                                              | -5.62163                                                                                                                | 112.926      | 1815.44       | 56.2673           | 1                |

| Gene ID   | p-value (Dx) | MeanRatio (DIPG vs. Astrocytoma and Ependymoma and Glioneural Tumor and JPA and Medulloblastoma and Meningioma) | FoldChange (DIPG vs. Astrocytoma and Ependymoma and Glioneural Tumor and JPA and Medulloblastoma and Meningioma) | F(Dx)   | SS(Dx)  | SS (Error) | F (Error) |
|-----------|--------------|-----------------------------------------------------------------------------------------------------------------|------------------------------------------------------------------------------------------------------------------|---------|---------|------------|-----------|
| SLC47A1   | 9.74E-15     | 0.0649308                                                                                                       | -15.401                                                                                                          | 109.465 | 2088.43 | 66.7748    | 1         |
| OGN       | 1.28E-14     | -0.0361667                                                                                                      | -27.6498                                                                                                         | 106.578 | 879.053 | 28.868     | 1         |
| FABP4     | 1.64E-13     | 0.0504111                                                                                                       | -19.8369                                                                                                         | 82.6719 | 637.376 | 26.984     | 1         |
| IGFBP6    | 2.13E-13     | -0.261895                                                                                                       | -3.81832                                                                                                         | 80.5553 | 682.646 | 29.6599    | 1         |
| OLFML2A   | 4.75E-13     | 0.179457                                                                                                        | -5.57237                                                                                                         | 74.3198 | 1662.05 | 78.2724    | 1         |
| CFH       | 5.00E-13     | 0.0045803                                                                                                       | -218.327                                                                                                         | 73.9402 | 1059.22 | 50.1386    | 1         |
| NOV       | 7.14E-13     | -0.0426764                                                                                                      | -23.4321                                                                                                         | 71.3248 | 1740.02 | 85.385     | 1         |
| EGFL6     | 7.33E-13     | 0.0152908                                                                                                       | -65.3988                                                                                                         | 71.1439 | 955.501 | 47.0069    | 1         |
| SFRP2     | 9.58E-13     | 0.187883                                                                                                        | -5.32245                                                                                                         | 69.2422 | 1210.09 | 61.1667    | 1         |
| SPTLC3    | 4.32E-12     | 0.02627                                                                                                         | -38.0663                                                                                                         | 59.4383 | 581.623 | 34.2486    | 1         |
| INMT      | 4.42E-12     | 0.0322503                                                                                                       | -31.0075                                                                                                         | 59.2985 | 694.229 | 40.9758    | 1         |
| DSP       | 5.09E-12     | 0.0300459                                                                                                       | -33.2825                                                                                                         | 58.4482 | 465.278 | 27.8619    | 1         |
| PKP2      | 7.42E-12     | 0.0656835                                                                                                       | -15.2245                                                                                                         | 56.245  | 492.14  | 30.6247    | 1         |
| GFAP      | 7.45E-12     | -0.0524153                                                                                                      | -19.0784                                                                                                         | 56.2188 | 4160.21 | 259.001    | 1         |
| BMP4      | 1.03E-11     | 0.0608471                                                                                                       | -16.4346                                                                                                         | 54.378  | 1252.2  | 80.597     | 1         |
| LEPR      | 1.77E-11     | 0.0115113                                                                                                       | -86.8712                                                                                                         | 51.4583 | 468.391 | 31.8582    | 1         |
| SLC7A2    | 2.05E-11     | -0.0520621                                                                                                      | -19.2078                                                                                                         | 50.6732 | 757.941 | 52.351     | 1         |
| LOC646723 | 4.32E-11     | -0.27088                                                                                                        | -3.69168                                                                                                         | 46.9199 | 561.352 | 41.8742    | 1         |
| LEPR      | 6.35E-11     | -0.0129145                                                                                                      | -77.4326                                                                                                         | 45.0742 | 435.582 | 33.8229    | 1         |
| GJB2      | 6.54E-11     | -0.144688                                                                                                       | -6.91143                                                                                                         | 44.9372 | 565.959 | 44.0806    | 1         |
| GJB6      | 7.05E-11     | 2.04799                                                                                                         | 2.04799                                                                                                          | 44.5854 | 45.5581 | 3.57636    | 1         |
| AOX1      | 7.11E-11     | 0.0755029                                                                                                       | -13.2445                                                                                                         | 44.5508 | 423.48  | 33.2694    | 1         |
| KLK6      | 7.55E-11     | 0.191059                                                                                                        | -5.23399                                                                                                         | 44.2722 | 474.776 | 37.534     | 1         |
| FOXD2     | 7.73E-11     | 0.0894962                                                                                                       | -11.1737                                                                                                         | 44.1621 | 557.077 | 44.1503    | 1         |
| CLEC3B    | 9.35E-11     | -0.101487                                                                                                       | -9.85348                                                                                                         | 43.295  | 550.355 | 44.4911    | 1         |
| EGFL6     | 9.38E-11     | 0.140905                                                                                                        | -7.09699                                                                                                         | 43.2788 | 509.487 | 41.2027    | 1         |
| SEC14L5   | 9.88E-11     | -0.0716292                                                                                                      | -13.9608                                                                                                         | 43.0449 | 323.863 | 26.3334    | 1         |

| Gene ID  | p-value (Dx) | MeanRatio (DIPG vs. Astrocytoma and Ependymoma and Glioneural Tumor and JPA and Medulloblastoma and Meningioma) | FoldChange (DIPG vs. Astrocytoma and Ependymoma and Glioneural Tumor and JPA and Medulloblastoma and Meningioma) | F(Dx)   | SS(Dx)  | SS (Error) | F (Error) |
|----------|--------------|-----------------------------------------------------------------------------------------------------------------|------------------------------------------------------------------------------------------------------------------|---------|---------|------------|-----------|
| IGF2     | 1.89E-10     | 0.0594116                                                                                                       | -16.8317                                                                                                         | 40.2136 | 946.503 | 82.3791    | 1         |
| SPTLC3   | 2.05E-10     | 0.0939977                                                                                                       | -10.6386                                                                                                         | 39.8745 | 304.843 | 26.7577    | 1         |
| LOX      | 2.22E-10     | 0.121211                                                                                                        | -8.25011                                                                                                         | 39.5503 | 475.417 | 42.0719    | 1         |
| CDH1     | 2.71E-10     | 0.302346                                                                                                        | -3.30746                                                                                                         | 38.7177 | 500.196 | 45.2167    | 1         |
| HSD17B2  | 4.33E-10     | 0.041973                                                                                                        | -23.8248                                                                                                         | 36.8507 | 285.236 | 27.0911    | 1         |
| LTF      | 5.14E-10     | -0.201784                                                                                                       | -4.95579                                                                                                         | 36.1826 | 487.718 | 47.1778    | 1         |
| CYP4X1   | 5.76E-10     | -2.7464                                                                                                         | 2.7464                                                                                                           | 35.7461 | 270.893 | 26.5238    | 1         |
| NDUFA4L2 | 7.46E-10     | 0.0983485                                                                                                       | -10.1679                                                                                                         | 34.7748 | 691.272 | 69.5747    | 1         |
| AK5      | 1.10E-09     | 0.00468706                                                                                                      | -213.353                                                                                                         | 33.3542 | 708.824 | 74.3799    | 1         |
| SOX8     | 1.49E-09     | -0.235424                                                                                                       | -4.24765                                                                                                         | 32.3043 | 1006.64 | 109.064    | 1         |
| FMO1     | 1.67E-09     | 0.0410385                                                                                                       | -24.3674                                                                                                         | 31.9028 | 320.407 | 35.1513    | 1         |
| ERMN     | 3.21E-09     | -0.0497368                                                                                                      | -20.1058                                                                                                         | 29.7265 | 252.912 | 29.7779    | 1         |
| NDRG4    | 3.58E-09     | 0.0506575                                                                                                       | -19.7404                                                                                                         | 29.3718 | 602.747 | 71.8246    | 1         |
| C1R      | 6.09E-09     | -0.44497                                                                                                        | -2.24734                                                                                                         | 27.7166 | 270.714 | 34.1853    | 1         |
| VCAM1    | 6.18E-09     | 0.423878                                                                                                        | -2.35917                                                                                                         | 27.6734 | 714.904 | 90.4176    | 1         |
| THSD4    | 7.64E-09     | 0.0546271                                                                                                       | -18.3059                                                                                                         | 27.0332 | 204.585 | 26.4877    | 1         |
| TMEM151A | 9.14E-09     | -0.0890641                                                                                                      | -11.2279                                                                                                         | 26.5044 | 261.809 | 34.5729    | 1         |
| PTGDR    | 1.10E-08     | 0.0348418                                                                                                       | -28.7012                                                                                                         | 25.9658 | 201.534 | 27.1654    | 1         |
| CHI3L2   | 1.32E-08     | 0.230219                                                                                                        | -4.34368                                                                                                         | 25.4566 | 284.431 | 39.1061    | 1         |
| SLC22A2  | 1.39E-08     | 0.134508                                                                                                        | -7.43451                                                                                                         | 25.2975 | 216.813 | 29.9968    | 1         |
| CCL26    | 1.48E-08     | 0.248646                                                                                                        | -4.02179                                                                                                         | 25.1249 | 160.127 | 22.3064    | 1         |
| IGF2     | 1.52E-08     | 0.146842                                                                                                        | -6.81003                                                                                                         | 25.0488 | 440.343 | 61.5278    | 1         |
| KIF1A    | 1.77E-08     | 0.101075                                                                                                        | -9.89367                                                                                                         | 24.631  | 888.678 | 126.279    | 1         |
| CLEC1A   | 1.86E-08     | -0.0222947                                                                                                      | -44.8538                                                                                                         | 24.5035 | 300.387 | 42.9062    | 1         |
| PRSS35   | 2.23E-08     | 0.224241                                                                                                        | -4.4595                                                                                                          | 24.0003 | 272.548 | 39.7461    | 1         |
| KLF4     | 3.15E-08     | 0.037525                                                                                                        | -26.6489                                                                                                         | 23.0914 | 357.093 | 54.125     | 1         |
| COL1A2   | 4.23E-08     | -0.168246                                                                                                       | -5.94368                                                                                                         | 22.3373 | 1380.3  | 216.278    | 1         |

| Gene ID   | p-value (Dx) | MeanRatio (DIPG vs. Astrocytoma and Ependymoma and Glioneural Tumor and JPA and Medulloblastoma and Meningioma) | FoldChange (DIPG vs. Astrocytoma and Ependymoma and Glioneural Tumor and JPA and Medulloblastoma and Meningioma) | F(Dx)   | SS(Dx)  | SS (Error) | F (Error) |
|-----------|--------------|-----------------------------------------------------------------------------------------------------------------|------------------------------------------------------------------------------------------------------------------|---------|---------|------------|-----------|
| FOSB      | 4.42E-08     | 0.000951801                                                                                                     | -1050.64                                                                                                         | 22.2232 | 996.24  | 156.901    | 1         |
| SMOC2     | 5.51E-08     | 0.121293                                                                                                        | -8.24447                                                                                                         | 21.6772 | 247.366 | 39.9396    | 1         |
| C1R       | 5.77E-08     | -0.43131                                                                                                        | -2.31852                                                                                                         | 21.5604 | 257.695 | 41.8327    | 1         |
| PAQR6     | 6.38E-08     | -0.013062                                                                                                       | -76.558                                                                                                          | 21.3159 | 393.063 | 64.5397    | 1         |
| COL1A1    | 6.42E-08     | -0.117127                                                                                                       | -8.53776                                                                                                         | 21.3017 | 840.539 | 138.105    | 1         |
| CNTNAP4   | 7.07E-08     | 0.0781455                                                                                                       | -12.7966                                                                                                         | 21.067  | 241.513 | 40.124     | 1         |
| SLPI      | 9.87E-08     | 0.292965                                                                                                        | -3.41338                                                                                                         | 20.2782 | 155.94  | 26.915     | 1         |
| CALB2     | 1.16E-07     | 0.0102172                                                                                                       | -97.874                                                                                                          | 19.91   | 361.448 | 63.5394    | 1         |
| GALNT9    | 1.18E-07     | 0.0822735                                                                                                       | -12.1546                                                                                                         | 19.8663 | 149.897 | 26.4086    | 1         |
| DACT1     | 1.19E-07     | 0.0276949                                                                                                       | -36.1077                                                                                                         | 19.8515 | 207.658 | 36.6119    | 1         |
| CAMK2B    | 1.50E-07     | -0.022012                                                                                                       | -45.4299                                                                                                         | 19.3206 | 367.438 | 66.5628    | 1         |
| CPXM2     | 1.72E-07     | -0.156016                                                                                                       | -6.40959                                                                                                         | 19.0115 | 222.396 | 40.943     | 1         |
| CDH19     | 1.73E-07     | 0.161353                                                                                                        | -6.19759                                                                                                         | 19.0061 | 541.888 | 99.7892    | 1         |
| FGL2      | 1.81E-07     | 0.0268162                                                                                                       | -37.2909                                                                                                         | 18.8963 | 364.989 | 67.6038    | 1         |
| 4-Sep     | 1.91E-07     | 0.0751701                                                                                                       | -13.3032                                                                                                         | 18.7872 | 330.902 | 61.6463    | 1         |
| LEPR      | 1.98E-07     | 0.0192786                                                                                                       | -51.871                                                                                                          | 18.7087 | 211.965 | 39.6541    | 1         |
| LOC646588 | 2.01E-07     | -42.2005                                                                                                        | 42.2005                                                                                                          | 18.6732 | 58.7223 | 11.0066    | 1         |
| EGFLAM    | 2.01E-07     | 0.0273428                                                                                                       | -36.5727                                                                                                         | 18.6731 | 216.736 | 40.624     | 1         |
| ACADL     | 2.07E-07     | 0.346482                                                                                                        | -2.88615                                                                                                         | 18.6076 | 152.798 | 28.7406    | 1         |
| PPAPDC1A  | 2.68E-07     | 0.35376                                                                                                         | -2.82678                                                                                                         | 18.0529 | 286.154 | 55.4779    | 1         |
| MXRA5     | 2.80E-07     | -0.305253                                                                                                       | -3.27597                                                                                                         | 17.9602 | 428.582 | 83.5202    | 1         |
| DAB2      | 2.83E-07     | 0.178819                                                                                                        | -5.59224                                                                                                         | 17.9364 | 250.766 | 48.933     | 1         |
| UNC13C    | 2.85E-07     | -0.0435445                                                                                                      | -22.965                                                                                                          | 17.9244 | 131.069 | 25.5931    | 1         |
| BEX1      | 2.95E-07     | 0.131219                                                                                                        | -7.62082                                                                                                         | 17.848  | 890.136 | 174.556    | 1         |
| ARHGDI3   | 3.13E-07     | -0.0453897                                                                                                      | -22.0314                                                                                                         | 17.7244 | 103.502 | 20.4384    | 1         |
| GRIN1     | 3.14E-07     | 0.0505781                                                                                                       | -19.7714                                                                                                         | 17.7216 | 635.308 | 125.473    | 1         |
| DSG2      | 3.48E-07     | 0.112654                                                                                                        | -8.87673                                                                                                         | 17.5047 | 236.257 | 47.2386    | 1         |

| Gene ID   | p-value (Dx) | MeanRatio (DIPG vs. Astrocytoma and Ependymoma and Glioneural Tumor and JPA and Medulloblastoma and Meningioma) | FoldChange (DIPG vs. Astrocytoma and Ependymoma and Glioneural Tumor and JPA and Medulloblastoma and Meningioma) | F(Dx)   | SS(Dx)  | SS (Error) | F (Error) |
|-----------|--------------|-----------------------------------------------------------------------------------------------------------------|------------------------------------------------------------------------------------------------------------------|---------|---------|------------|-----------|
| COPZ2     | 3.57E-07     | -0.0910452                                                                                                      | -10.9836                                                                                                         | 17.4526 | 149.338 | 29.9486    | 1         |
| OLFML1    | 4.04E-07     | 0.0457798                                                                                                       | -21.8437                                                                                                         | 17.1964 | 152.781 | 31.0956    | 1         |
| ANXA2P1   | 4.24E-07     | -0.224186                                                                                                       | -4.46059                                                                                                         | 17.1024 | 180.954 | 37.0321    | 1         |
| SVEP1     | 4.48E-07     | 0.270582                                                                                                        | -3.69574                                                                                                         | 16.9891 | 230.33  | 47.4513    | 1         |
| CACNA1I   | 4.65E-07     | -0.0873518                                                                                                      | -11.448                                                                                                          | 16.9147 | 103.881 | 21.4951    | 1         |
| SLC12A5   | 5.05E-07     | 0.181184                                                                                                        | -5.51926                                                                                                         | 16.7475 | 976.893 | 204.157    | 1         |
| PCBP4     | 5.14E-07     | -0.0382874                                                                                                      | -26.1183                                                                                                         | 16.7127 | 241.543 | 50.5841    | 1         |
| ADH1A     | 5.51E-07     | -0.122357                                                                                                       | -8.1728                                                                                                          | 16.5752 | 128.564 | 27.1474    | 1         |
| EGFLAM    | 6.33E-07     | 0.207302                                                                                                        | -4.82388                                                                                                         | 16.3003 | 345.626 | 74.213     | 1         |
| DHRS9     | 6.71E-07     | -4.53542                                                                                                        | 4.53542                                                                                                          | 16.1873 | 47.9867 | 10.3756    | 1         |
| C2orf40   | 7.25E-07     | 0.130196                                                                                                        | -7.68072                                                                                                         | 16.038  | 562.712 | 122.801    | 1         |
| COLEC12   | 7.32E-07     | -0.0374183                                                                                                      | -26.7249                                                                                                         | 16.0187 | 246.266 | 53.8076    | 1         |
| TNFRSF11B | 7.41E-07     | -0.222331                                                                                                       | -4.4978                                                                                                          | 15.9936 | 224.668 | 49.1657    | 1         |
| KCNJ4     | 8.01E-07     | -5.32407                                                                                                        | 5.32407                                                                                                          | 15.846  | 72.1759 | 15.9419    | 1         |
| PTPRR     | 8.57E-07     | -26.3832                                                                                                        | 26.3832                                                                                                          | 15.7161 | 47.2541 | 10.5236    | 1         |
| FLJ40504  | 9.62E-07     | -0.329264                                                                                                       | -3.03708                                                                                                         | 15.4968 | 141.832 | 32.0333    | 1         |
| CMTM8     | 1.01E-06     | 0.366321                                                                                                        | -2.72984                                                                                                         | 15.4116 | 350.676 | 79.6393    | 1         |
| LEPR      | 1.22E-06     | 0.0553656                                                                                                       | -18.0618                                                                                                         | 15.0532 | 135.865 | 31.5898    | 1         |
| C1S       | 1.23E-06     | -0.0543548                                                                                                      | -18.3976                                                                                                         | 15.0453 | 356.094 | 82.8383    | 1         |
| SULT4A1   | 1.24E-06     | -0.0813952                                                                                                      | -12.2857                                                                                                         | 15.0273 | 102.85  | 23.9547    | 1         |
| F13A1     | 1.39E-06     | 0.00590281                                                                                                      | -169.411                                                                                                         | 14.8191 | 165.197 | 39.0165    | 1         |
| FOXC1     | 1.49E-06     | -0.0954113                                                                                                      | -10.4809                                                                                                         | 14.696  | 534.562 | 127.312    | 1         |
| GYPC      | 1.49E-06     | 0.136748                                                                                                        | -7.31271                                                                                                         | 14.6876 | 171.813 | 40.9425    | 1         |
| DCN       | 1.50E-06     | -0.477381                                                                                                       | -2.09476                                                                                                         | 14.678  | 212.271 | 50.6164    | 1         |
| PCTK3     | 1.52E-06     | -0.0667617                                                                                                      | -14.9787                                                                                                         | 14.6532 | 142.774 | 34.1025    | 1         |
| GNAO1     | 1.62E-06     | 0.101019                                                                                                        | -9.89911                                                                                                         | 14.5448 | 291.558 | 70.1595    | 1         |
| GPM6B     | 1.63E-06     | 0.0922159                                                                                                       | -10.8441                                                                                                         | 14.5248 | 1438.87 | 346.721    | 1         |

| Gene ID   | p-value (Dx) | MeanRatio (DIPG vs. Astrocytoma and Ependymoma and Glioneural Tumor and JPA and Medulloblastoma and Meningioma) | FoldChange (DIPG vs. Astrocytoma and Ependymoma and Glioneural Tumor and JPA and Medulloblastoma and Meningioma) | F(Dx)   | SS(Dx)  | SS (Error) | F (Error) |
|-----------|--------------|-----------------------------------------------------------------------------------------------------------------|------------------------------------------------------------------------------------------------------------------|---------|---------|------------|-----------|
| FMOD      | 1.72E-06     | 0.0695342                                                                                                       | -14.3814                                                                                                         | 14.4355 | 142.875 | 34.641     | 1         |
| FAM123A   | 1.80E-06     | 0.065875                                                                                                        | -15.1803                                                                                                         | 14.3505 | 1337.11 | 326.113    | 1         |
| OLIG1     | 1.86E-06     | -0.413006                                                                                                       | -2.42127                                                                                                         | 14.2979 | 572.984 | 140.262    | 1         |
| FMO2      | 1.99E-06     | -0.178855                                                                                                       | -5.59113                                                                                                         | 14.1774 | 130.878 | 32.31      | 1         |
| DACT1     | 2.08E-06     | 0.0339949                                                                                                       | -29.4162                                                                                                         | 14.0941 | 165.379 | 41.0687    | 1         |
| CLIC6     | 2.18E-06     | 0.483303                                                                                                        | -2.06909                                                                                                         | 14.0155 | 381.727 | 95.3264    | 1         |
| S100A4    | 2.30E-06     | 0.110344                                                                                                        | -9.06254                                                                                                         | 13.9229 | 311.555 | 78.32      | 1         |
| EGFLAM    | 2.55E-06     | -0.101711                                                                                                       | -9.8318                                                                                                          | 13.7461 | 128.214 | 32.6456    | 1         |
| RNASE2    | 2.57E-06     | -0.449415                                                                                                       | -2.22511                                                                                                         | 13.7305 | 132.796 | 33.8507    | 1         |
| PLEKHB1   | 2.73E-06     | 0.336449                                                                                                        | -2.97222                                                                                                         | 13.6283 | 509.141 | 130.757    | 1         |
| CYR61     | 2.74E-06     | 0.0779726                                                                                                       | -12.825                                                                                                          | 13.6221 | 613.765 | 157.699    | 1         |
| KCNJ4     | 3.15E-06     | -0.119368                                                                                                       | -8.37747                                                                                                         | 13.3835 | 76.9915 | 20.1345    | 1         |
| PDE1A     | 3.70E-06     | -2.85087                                                                                                        | 2.85087                                                                                                          | 13.1158 | 108.567 | 28.9715    | 1         |
| SYN1      | 3.88E-06     | 0.0265781                                                                                                       | -37.625                                                                                                          | 13.0373 | 773.327 | 207.608    | 1         |
| S100A4    | 3.94E-06     | 0.028247                                                                                                        | -35.402                                                                                                          | 13.0142 | 293.174 | 78.8453    | 1         |
| KIAA1644  | 3.94E-06     | -0.113779                                                                                                       | -8.78895                                                                                                         | 13.0114 | 79.2279 | 21.312     | 1         |
| GAS7      | 4.08E-06     | -0.0787714                                                                                                      | -12.695                                                                                                          | 12.9547 | 171.145 | 46.2386    | 1         |
| LOC202134 | 4.26E-06     | -0.181208                                                                                                       | -5.51852                                                                                                         | 12.8852 | 70.935  | 19.2681    | 1         |
| PCOLCE    | 4.49E-06     | 0.0364581                                                                                                       | -27.4288                                                                                                         | 12.8003 | 201.638 | 55.1342    | 1         |
| ENPP6     | 4.71E-06     | -49.1695                                                                                                        | 49.1695                                                                                                          | 12.7207 | 119.512 | 32.8826    | 1         |
| CD163     | 4.77E-06     | -0.315451                                                                                                       | -3.17007                                                                                                         | 12.7001 | 367.397 | 101.251    | 1         |
| NFKBIZ    | 4.92E-06     | -0.021119                                                                                                       | -47.3507                                                                                                         | 12.6496 | 247.673 | 68.5284    | 1         |
| COL5A1    | 5.02E-06     | 0.42358                                                                                                         | -2.36083                                                                                                         | 12.6193 | 355.99  | 98.7349    | 1         |
| PLAC9     | 5.02E-06     | -0.188294                                                                                                       | -5.31083                                                                                                         | 12.6169 | 182.349 | 50.5845    | 1         |
| EEF1A2    | 5.09E-06     | -0.0317907                                                                                                      | -31.4557                                                                                                         | 12.596  | 780.022 | 216.741    | 1         |
| CAV2      | 5.10E-06     | 0.149456                                                                                                        | -6.69093                                                                                                         | 12.5925 | 418.277 | 116.257    | 1         |
| TUBB4     | 5.23E-06     | 0.297367                                                                                                        | -3.36285                                                                                                         | 12.5528 | 1591.11 | 443.636    | 1         |

| Gene ID  | p-value (Dx) | MeanRatio (DIPG vs. Astrocytoma and Ependymoma and Glioneural Tumor and JPA and Medulloblastoma and Meningioma) | FoldChange (DIPG vs. Astrocytoma and Ependymoma and Glioneural Tumor and JPA and Medulloblastoma and Meningioma) | F(Dx)   | SS(Dx)  | SS (Error) | F (Error) |
|----------|--------------|-----------------------------------------------------------------------------------------------------------------|------------------------------------------------------------------------------------------------------------------|---------|---------|------------|-----------|
| GMDS     | 5.74E-06     | 0.289423                                                                                                        | -3.45514                                                                                                         | 12.4035 | 510.971 | 144.185    | 1         |
| HEPACAM  | 6.13E-06     | 0.0762888                                                                                                       | -13.1081                                                                                                         | 12.3005 | 1051.43 | 299.176    | 1         |
| PDE1A    | 6.26E-06     | -7.00047                                                                                                        | 7.00047                                                                                                          | 12.2669 | 138.992 | 39.6573    | 1         |
| FRZB     | 6.76E-06     | 0.0800371                                                                                                       | -12.4942                                                                                                         | 12.1465 | 652.111 | 187.905    | 1         |
| PDGFRL   | 7.15E-06     | -2.21318                                                                                                        | 2.21318                                                                                                          | 12.0582 | 76.8074 | 22.294     | 1         |
| LY6H     | 7.42E-06     | -0.0383684                                                                                                      | -26.0631                                                                                                         | 11.9998 | 287.45  | 83.841     | 1         |
| OSMR     | 8.16E-06     | -0.380657                                                                                                       | -2.62704                                                                                                         | 11.8535 | 120.452 | 35.566     | 1         |
| COL11A1  | 8.17E-06     | 0.401263                                                                                                        | -2.49213                                                                                                         | 11.8524 | 203.873 | 60.2036    | 1         |
| KIAA1239 | 8.33E-06     | -25.1861                                                                                                        | 25.1861                                                                                                          | 11.8224 | 34.0788 | 10.089     | 1         |
| MPPED1   | 9.37E-06     | -0.368834                                                                                                       | -2.71125                                                                                                         | 11.6424 | 58.3848 | 17.5519    | 1         |
| LYZ      | 1.00E-05     | -0.0704014                                                                                                      | -14.2043                                                                                                         | 11.5408 | 275.218 | 83.4656    | 1         |
| VCAM1    | 1.04E-05     | 0.0649881                                                                                                       | -15.3874                                                                                                         | 11.4901 | 101.648 | 30.9631    | 1         |
| AK5      | 1.06E-05     | -31.5337                                                                                                        | 31.5337                                                                                                          | 11.4537 | 463.069 | 141.504    | 1         |
| ANKRD18A | 1.07E-05     | -8.97136                                                                                                        | 8.97136                                                                                                          | 11.4448 | 49.1161 | 15.0205    | 1         |
| GLT8D2   | 1.07E-05     | -0.302417                                                                                                       | -3.3067                                                                                                          | 11.4382 | 138.506 | 42.3817    | 1         |
| KLF4     | 1.09E-05     | -0.0174218                                                                                                      | -57.3992                                                                                                         | 11.4115 | 97.6358 | 29.9456    | 1         |
| EDNRA    | 1.10E-05     | 0.305043                                                                                                        | -3.27823                                                                                                         | 11.4013 | 265.341 | 81.4552    | 1         |
| CIDEA    | 1.10E-05     | -0.366064                                                                                                       | -2.73177                                                                                                         | 11.3934 | 36.1792 | 11.1141    | 1         |
| COL6A3   | 1.16E-05     | -0.134639                                                                                                       | -7.42724                                                                                                         | 11.3147 | 375.007 | 116.002    | 1         |
| APLN     | 1.20E-05     | 0.0855813                                                                                                       | -11.6848                                                                                                         | 11.2738 | 542.876 | 168.539    | 1         |
| LHX6     | 1.22E-05     | -20.0601                                                                                                        | 20.0601                                                                                                          | 11.244  | 44.5037 | 13.853     | 1         |
| TCEAL2   | 1.24E-05     | 0.0928182                                                                                                       | -10.7737                                                                                                         | 11.2247 | 424.866 | 132.479    | 1         |
| TNNC1    | 1.34E-05     | -0.0303211                                                                                                      | -32.9804                                                                                                         | 11.1059 | 84.8738 | 26.7478    | 1         |
| MCTP1    | 1.36E-05     | -25.2512                                                                                                        | 25.2512                                                                                                          | 11.0848 | 41.8721 | 13.221     | 1         |
| NPTX1    | 1.37E-05     | -0.0383026                                                                                                      | -26.1079                                                                                                         | 11.0776 | 808.484 | 255.442    | 1         |
| C1QTNF1  | 1.50E-05     | -0.0103758                                                                                                      | -96.3782                                                                                                         | 10.9392 | 439.34  | 140.567    | 1         |
| EPB41L1  | 1.57E-05     | -0.0456455                                                                                                      | -21.908                                                                                                          | 10.8793 | 74.4284 | 23.9446    | 1         |

| Gene ID      | p-value (Dx) | MeanRatio (DIPG vs. Astrocytoma and Ependymoma and Glioneural Tumor and JPA and Medulloblastoma and Meningioma) | FoldChange (DIPG vs. Astrocytoma and Ependymoma and Glioneural Tumor and JPA and Medulloblastoma and Meningioma) | F(Dx)   | SS(Dx)  | SS (Error) | F (Error) |
|--------------|--------------|-----------------------------------------------------------------------------------------------------------------|------------------------------------------------------------------------------------------------------------------|---------|---------|------------|-----------|
| LOC202134    | 1.78E-05     | -16.7554                                                                                                        | 16.7554                                                                                                          | 10.6993 | 61.48   | 20.1115    | 1         |
| CAPN3        | 1.84E-05     | -0.045709                                                                                                       | -21.8775                                                                                                         | 10.6447 | 105.555 | 34.7066    | 1         |
| LOC100129076 | 1.88E-05     | 0.153555                                                                                                        | -6.51233                                                                                                         | 10.614  | 180.259 | 59.4408    | 1         |
| LY6H         | 2.03E-05     | 0.0624633                                                                                                       | -16.0094                                                                                                         | 10.5077 | 245.156 | 81.6587    | 1         |
| ABCA2        | 2.07E-05     | -0.0248195                                                                                                      | -40.2909                                                                                                         | 10.4785 | 246.486 | 82.3308    | 1         |
| A2BP1        | 2.16E-05     | -219.873                                                                                                        | 219.873                                                                                                          | 10.4206 | 37.5379 | 12.6079    | 1         |
| MAMDC2       | 2.17E-05     | -0.119879                                                                                                       | -8.34176                                                                                                         | 10.4171 | 149.95  | 50.3813    | 1         |
| NCDN         | 2.23E-05     | 0.0173904                                                                                                       | -57.5031                                                                                                         | 10.3796 | 88.709  | 29.9126    | 1         |
| PRSS23       | 2.26E-05     | -0.188538                                                                                                       | -5.30397                                                                                                         | 10.3599 | 212.357 | 71.743     | 1         |
| ASS1         | 2.28E-05     | -0.0980171                                                                                                      | -10.2023                                                                                                         | 10.3424 | 151.831 | 51.3814    | 1         |
| LDB3         | 2.45E-05     | -20.537                                                                                                         | 20.537                                                                                                           | 10.2471 | 27.7292 | 9.47121    | 1         |
| MPZL2        | 2.56E-05     | -0.0405674                                                                                                      | -24.6503                                                                                                         | 10.1864 | 168.558 | 57.9157    | 1         |
| PPIC         | 2.56E-05     | -0.0679178                                                                                                      | -14.7237                                                                                                         | 10.1845 | 284.726 | 97.8485    | 1         |
| S100A13      | 2.58E-05     | -0.233188                                                                                                       | -4.28839                                                                                                         | 10.1755 | 62.5154 | 21.503     | 1         |
| CA3          | 2.67E-05     | 0.321693                                                                                                        | -3.10855                                                                                                         | 10.1277 | 87.4586 | 30.2246    | 1         |
| UGT8         | 2.69E-05     | -0.108517                                                                                                       | -9.21513                                                                                                         | 10.1141 | 337.681 | 116.855    | 1         |
| PLA2G2A      | 2.70E-05     | -0.0709856                                                                                                      | -14.0874                                                                                                         | 10.1085 | 3624.51 | 1254.96    | 1         |
| AQP4         | 2.96E-05     | 0.0722939                                                                                                       | -13.8324                                                                                                         | 9.9863  | 640.291 | 224.409    | 1         |
| PRKCZ        | 2.97E-05     | 0.0197786                                                                                                       | -50.5598                                                                                                         | 9.98001 | 144.515 | 50.6816    | 1         |
| CPEB3        | 3.04E-05     | -0.0322493                                                                                                      | -31.0085                                                                                                         | 9.94983 | 117.18  | 41.2198    | 1         |
| CTGF         | 3.11E-05     | -0.251239                                                                                                       | -3.98027                                                                                                         | 9.91782 | 268.959 | 94.9157    | 1         |
| HSP90AA1     | 3.24E-05     | -0.0917454                                                                                                      | -10.8997                                                                                                         | 9.86021 | 97.0253 | 34.4403    | 1         |
| LOC440359    | 3.25E-05     | 0.379707                                                                                                        | -2.63361                                                                                                         | 9.85785 | 259.261 | 92.0497    | 1         |
| FXD5         | 3.38E-05     | 0.367864                                                                                                        | -2.71839                                                                                                         | 9.80657 | 195.58  | 69.8031    | 1         |
| ZNF365       | 3.39E-05     | -0.0592295                                                                                                      | -16.8835                                                                                                         | 9.80274 | 312.228 | 111.479    | 1         |
| GPR34        | 3.47E-05     | -0.456223                                                                                                       | -2.19191                                                                                                         | 9.7694  | 137.997 | 49.4389    | 1         |
| FSTL1        | 3.59E-05     | 0.046535                                                                                                        | -21.4892                                                                                                         | 9.72555 | 439.348 | 158.111    | 1         |



| Gene ID   | p-value (Dx) | MeanRatio (DIPG vs. Astrocytoma and Ependymoma and Glioneural Tumor and JPA and Medulloblastoma and Meningioma) | FoldChange (DIPG vs. Astrocytoma and Ependymoma and Glioneural Tumor and JPA and Medulloblastoma and Meningioma) | F(Dx)   | SS(Dx)  | SS (Error) | F (Error) |
|-----------|--------------|-----------------------------------------------------------------------------------------------------------------|------------------------------------------------------------------------------------------------------------------|---------|---------|------------|-----------|
| COL8A2    | 3.60E-05     | -0.059821                                                                                                       | -16.7165                                                                                                         | 9.72117 | 81.4383 | 29.321     | 1         |
| CD163     | 3.61E-05     | -0.243023                                                                                                       | -4.11483                                                                                                         | 9.71542 | 353.275 | 127.268    | 1         |
| ELAVL3    | 3.69E-05     | 0.110249                                                                                                        | -9.07038                                                                                                         | 9.68533 | 179.92  | 65.0178    | 1         |
| TGFBI     | 3.91E-05     | 0.230062                                                                                                        | -4.34665                                                                                                         | 9.61028 | 517.556 | 188.491    | 1         |
| CTSK      | 4.04E-05     | 0.292125                                                                                                        | -3.42319                                                                                                         | 9.56712 | 275.804 | 100.899    | 1         |
| MAP4      | 4.28E-05     | 0.252445                                                                                                        | -3.96126                                                                                                         | 9.48919 | 138.546 | 51.1015    | 1         |
| ARHGDIG   | 4.34E-05     | -40.189                                                                                                         | 40.189                                                                                                           | 9.4721  | 67.1133 | 24.7988    | 1         |
| GPR124    | 4.46E-05     | -0.0668909                                                                                                      | -14.9497                                                                                                         | 9.43504 | 103.426 | 38.3667    | 1         |
| COBL      | 4.49E-05     | 0.302021                                                                                                        | -3.31103                                                                                                         | 9.42806 | 454.239 | 168.628    | 1         |
| C7        | 4.61E-05     | -0.245464                                                                                                       | -4.07392                                                                                                         | 9.39286 | 76.5107 | 28.5097    | 1         |
| MPPED1    | 4.64E-05     | -41.5294                                                                                                        | 41.5294                                                                                                          | 9.38327 | 34.8015 | 12.9811    | 1         |
| LOC340274 | 4.65E-05     | -0.351203                                                                                                       | -2.84735                                                                                                         | 9.38092 | 57.3138 | 21.3837    | 1         |
| SLCO1A2   | 4.69E-05     | -4.16267                                                                                                        | 4.16267                                                                                                          | 9.36865 | 45.6412 | 17.0509    | 1         |
| ABCC3     | 5.17E-05     | -0.440013                                                                                                       | -2.27266                                                                                                         | 9.24401 | 238.691 | 90.374     | 1         |
| HHIP      | 5.17E-05     | -16.9895                                                                                                        | 16.9895                                                                                                          | 9.24325 | 37.6056 | 14.2395    | 1         |
| TAGLN3    | 5.51E-05     | 0.364464                                                                                                        | -2.74375                                                                                                         | 9.16121 | 684.036 | 261.333    | 1         |
| MT3       | 5.66E-05     | 0.173602                                                                                                        | -5.7603                                                                                                          | 9.12684 | 2237.69 | 858.12     | 1         |
| CHN2      | 5.68E-05     | 0.0435599                                                                                                       | -22.9569                                                                                                         | 9.12136 | 165.512 | 63.5095    | 1         |
| C3        | 5.77E-05     | -0.0657765                                                                                                      | -15.203                                                                                                          | 9.10157 | 119.098 | 45.799     | 1         |
| FAIM2     | 6.04E-05     | 0.349343                                                                                                        | -2.86251                                                                                                         | 9.0425  | 478.567 | 185.235    | 1         |
| ECM2      | 6.10E-05     | 0.0111968                                                                                                       | -89.3113                                                                                                         | 9.0302  | 97.8463 | 37.924     | 1         |
| SYN2      | 6.15E-05     | 0.304639                                                                                                        | -3.28257                                                                                                         | 9.01973 | 187.715 | 72.8407    | 1         |
| LOC653879 | 6.28E-05     | -0.441049                                                                                                       | -2.26732                                                                                                         | 8.99386 | 143.503 | 55.845     | 1         |
| TMEM151A  | 6.31E-05     | -10.9503                                                                                                        | 10.9503                                                                                                          | 8.98824 | 103.862 | 40.4436    | 1         |
| CDKN2D    | 6.47E-05     | 0.0266125                                                                                                       | -37.5764                                                                                                         | 8.95525 | 63.2601 | 24.7241    | 1         |
| SNAI2     | 6.57E-05     | 0.319686                                                                                                        | -3.12806                                                                                                         | 8.93585 | 170.077 | 66.6159    | 1         |
| 4-Sep     | 6.64E-05     | 8.64721                                                                                                         | 8.64721                                                                                                          | 8.92171 | 113.322 | 44.4563    | 1         |

| Gene ID  | p-value (Dx) | MeanRatio (DIPG vs. Astrocytoma and Ependymoma and Glioneural Tumor and JPA and Medulloblastoma and Meningioma) | FoldChange (DIPG vs. Astrocytoma and Ependymoma and Glioneural Tumor and JPA and Medulloblastoma and Meningioma) | F(Dx)   | SS(Dx)  | SS (Error) | F (Error) |
|----------|--------------|-----------------------------------------------------------------------------------------------------------------|------------------------------------------------------------------------------------------------------------------|---------|---------|------------|-----------|
| CRIP1    | 6.71E-05     | -0.0350844                                                                                                      | -28.5027                                                                                                         | 8.9102  | 942.519 | 370.229    | 1         |
| PPP2R2B  | 6.80E-05     | 0.0115364                                                                                                       | -86.6824                                                                                                         | 8.89216 | 360.833 | 142.026    | 1         |
| SCN2A    | 7.22E-05     | -0.0310748                                                                                                      | -32.1804                                                                                                         | 8.81728 | 350.442 | 139.107    | 1         |
| SYT15    | 7.27E-05     | -5.59994                                                                                                        | 5.59994                                                                                                          | 8.80857 | 44.8467 | 17.8194    | 1         |
| STMN2    | 7.27E-05     | 0.208759                                                                                                        | -4.79021                                                                                                         | 8.8083  | 2202.28 | 875.081    | 1         |
| COL6A2   | 7.36E-05     | 0.331353                                                                                                        | -3.01793                                                                                                         | 8.79218 | 111.694 | 44.4633    | 1         |
| DAB2     | 7.52E-05     | 0.215067                                                                                                        | -4.64971                                                                                                         | 8.76638 | 164.134 | 65.5311    | 1         |
| SULF1    | 7.80E-05     | -0.0741582                                                                                                      | -13.4847                                                                                                         | 8.71943 | 373.768 | 150.031    | 1         |
| GPIHBP1  | 7.90E-05     | -0.059042                                                                                                       | -16.9371                                                                                                         | 8.70424 | 100.844 | 40.5497    | 1         |
| CAPN3    | 8.13E-05     | -0.0300084                                                                                                      | -33.324                                                                                                          | 8.66922 | 183.651 | 74.1447    | 1         |
| KCNMA1   | 8.23E-05     | -3.44057                                                                                                        | 3.44057                                                                                                          | 8.6535  | 147.564 | 59.6839    | 1         |
| ABCA9    | 8.33E-05     | -7.67746                                                                                                        | 7.67746                                                                                                          | 8.63895 | 34.0513 | 13.7956    | 1         |
| SLC4A5   | 8.44E-05     | -110.902                                                                                                        | 110.902                                                                                                          | 8.6217  | 31.9677 | 12.9774    | 1         |
| DBNDD2   | 8.70E-05     | -0.0365218                                                                                                      | -27.3809                                                                                                         | 8.58445 | 163.797 | 66.7823    | 1         |
| CYP4X1   | 8.74E-05     | 13.5621                                                                                                         | 13.5621                                                                                                          | 8.57903 | 46.6709 | 19.0404    | 1         |
| ERMN     | 9.01E-05     | 24.2623                                                                                                         | 24.2623                                                                                                          | 8.54189 | 130.055 | 53.2896    | 1         |
| TRIM22   | 9.33E-05     | -0.457743                                                                                                       | -2.18463                                                                                                         | 8.49904 | 151.966 | 62.5812    | 1         |
| PPP4R4   | 9.48E-05     | -26.7545                                                                                                        | 26.7545                                                                                                          | 8.47864 | 31.96   | 13.1931    | 1         |
| NAPSB    | 9.57E-05     | -2.12877                                                                                                        | 2.12877                                                                                                          | 8.46747 | 126.756 | 52.3942    | 1         |
| NCDN     | 9.83E-05     | -769.364                                                                                                        | 769.364                                                                                                          | 8.43439 | 86.0991 | 35.7283    | 1         |
| ZNF365   | 0.0001019    | -25.9043                                                                                                        | 25.9043                                                                                                          | 8.39114 | 186.749 | 77.8942    | 1         |
| PLP1     | 0.0001039    | 0.292649                                                                                                        | -3.41706                                                                                                         | 8.3666  | 2331.1  | 975.17     | 1         |
| RARRES2  | 0.0001071    | -0.191536                                                                                                       | -5.22095                                                                                                         | 8.33047 | 286.337 | 120.303    | 1         |
| MAPK8IP2 | 0.0001101    | -0.0492614                                                                                                      | -20.2999                                                                                                         | 8.29684 | 43.4669 | 18.3364    | 1         |
| KDELR3   | 0.0001131    | -0.160076                                                                                                       | -6.24704                                                                                                         | 8.26402 | 78.7632 | 33.358     | 1         |
| KDELR3   | 0.0001163    | -0.104331                                                                                                       | -9.58491                                                                                                         | 8.23125 | 90.9491 | 38.6724    | 1         |
| PRKCZ    | 0.0001163    | 0.0133079                                                                                                       | -75.1434                                                                                                         | 8.23076 | 193.183 | 82.1482    | 1         |

| Gene ID      | p-value (Dx) | MeanRatio (DIPG vs. Astrocytoma and Ependymoma and Glioneural Tumor and JPA and Medulloblastoma and Meningioma) | FoldChange (DIPG vs. Astrocytoma and Ependymoma and Glioneural Tumor and JPA and Medulloblastoma and Meningioma) | F(Dx)   | SS(Dx)  | SS (Error) | F (Error) |
|--------------|--------------|-----------------------------------------------------------------------------------------------------------------|------------------------------------------------------------------------------------------------------------------|---------|---------|------------|-----------|
| GALNTL2      | 0.0001172    | -0.271086                                                                                                       | -3.68887                                                                                                         | 8.22119 | 112.414 | 47.8581    | 1         |
| SERPINI1     | 0.0001182    | 0.298404                                                                                                        | -3.35116                                                                                                         | 8.21134 | 219.667 | 93.6308    | 1         |
| LOC100133511 | 0.0001199    | -0.20253                                                                                                        | -4.93754                                                                                                         | 8.19418 | 127.889 | 54.6255    | 1         |
| ECM2         | 0.0001319    | -0.00259733                                                                                                     | -385.011                                                                                                         | 8.08025 | 252.004 | 109.157    | 1         |
| MATK         | 0.0001335    | -0.252491                                                                                                       | -3.96053                                                                                                         | 8.06557 | 94.1257 | 40.8452    | 1         |
| SLCO3A1      | 0.000135     | 0.0804778                                                                                                       | -12.4258                                                                                                         | 8.05244 | 59.7752 | 25.9813    | 1         |
| SLCO1A2      | 0.0001373    | -10.3217                                                                                                        | 10.3217                                                                                                          | 8.03264 | 32.5376 | 14.1774    | 1         |
| CTGF         | 0.0001449    | -0.239504                                                                                                       | -4.17529                                                                                                         | 7.96888 | 142.001 | 62.368     | 1         |
| SYT7         | 0.000145     | -0.0746777                                                                                                      | -13.3909                                                                                                         | 7.96817 | 274.519 | 120.582    | 1         |
| OSR1         | 0.000148     | 4.94306                                                                                                         | 4.94306                                                                                                          | 7.94444 | 178.358 | 78.5776    | 1         |
| NBL1         | 0.000151     | 3.98658                                                                                                         | 3.98658                                                                                                          | 7.92071 | 112.627 | 49.7677    | 1         |
| SCN3B        | 0.0001539    | 0.24339                                                                                                         | -4.10863                                                                                                         | 7.89847 | 92.1232 | 40.822     | 1         |
| SCN1B        | 0.0001659    | 0.0544914                                                                                                       | -18.3515                                                                                                         | 7.81016 | 35.3392 | 15.8367    | 1         |
| SLCO3A1      | 0.0001687    | 0.227663                                                                                                        | -4.39245                                                                                                         | 7.79131 | 50.4658 | 22.6702    | 1         |
| ZNF436       | 0.000174     | -15.6611                                                                                                        | 15.6611                                                                                                          | 7.75511 | 43.6512 | 19.7004    | 1         |
| PMP2         | 0.0001804    | -0.286902                                                                                                       | -3.48551                                                                                                         | 7.71313 | 803.597 | 364.65     | 1         |
| GUCY1A3      | 0.000181     | -0.226982                                                                                                       | -4.40564                                                                                                         | 7.70964 | 168.585 | 76.5338    | 1         |
| RGS20        | 0.0001819    | -4.80798                                                                                                        | 4.80798                                                                                                          | 7.70351 | 48.1307 | 21.8676    | 1         |
| 4-Sep        | 0.0001826    | 0.241627                                                                                                        | -4.1386                                                                                                          | 7.69917 | 192.394 | 87.4612    | 1         |
| BRUNOL4      | 0.0001845    | -98.827                                                                                                         | 98.827                                                                                                           | 7.68768 | 23.2899 | 10.6033    | 1         |
| EPB41L1      | 0.0001849    | -81.5736                                                                                                        | 81.5736                                                                                                          | 7.68516 | 51.2456 | 23.3384    | 1         |
| MIR155HG     | 0.0001853    | -0.0118577                                                                                                      | -84.3336                                                                                                         | 7.68236 | 71.9916 | 32.7986    | 1         |
| KRT18P13     | 0.000187     | -0.24282                                                                                                        | -4.11828                                                                                                         | 7.67168 | 62.722  | 28.6153    | 1         |
| PTPRR        | 0.000188     | -0.0548314                                                                                                      | -18.2377                                                                                                         | 7.66585 | 37.0071 | 16.8964    | 1         |
| LPAR1        | 0.00019      | 0.169719                                                                                                        | -5.89208                                                                                                         | 7.65354 | 288.724 | 132.035    | 1         |
| ASS1         | 0.0001932    | -0.0838944                                                                                                      | -11.9198                                                                                                         | 7.63438 | 112.523 | 51.5863    | 1         |
| TPD52L1      | 0.0001966    | 54.7848                                                                                                         | 54.7848                                                                                                          | 7.61454 | 54.1338 | 24.8824    | 1         |

| Gene ID   | p-value (Dx) | MeanRatio (DIPG vs. Astrocytoma and Ependymoma and Glioneural Tumor and JPA and Medulloblastoma and Meningioma) | FoldChange (DIPG vs. Astrocytoma and Ependymoma and Glioneural Tumor and JPA and Medulloblastoma and Meningioma) | F(Dx)   | SS(Dx)  | SS (Error) | F (Error) |
|-----------|--------------|-----------------------------------------------------------------------------------------------------------------|------------------------------------------------------------------------------------------------------------------|---------|---------|------------|-----------|
| TTYH1     | 0.0001972    | -0.346835                                                                                                       | -2.88322                                                                                                         | 7.61105 | 501.046 | 230.41     | 1         |
| CRYM      | 0.0001984    | -3.49778                                                                                                        | 3.49778                                                                                                          | 7.60396 | 27.9341 | 12.8577    | 1         |
| LHX6      | 0.000201     | -0.0648227                                                                                                      | -15.4267                                                                                                         | 7.58927 | 40.8938 | 18.8593    | 1         |
| KIAA1239  | 0.0002022    | -0.151163                                                                                                       | -6.61537                                                                                                         | 7.58231 | 31.6692 | 14.6185    | 1         |
| RARRES3   | 0.0002025    | -2126.37                                                                                                        | 2126.37                                                                                                          | 7.58057 | 152.45  | 70.3872    | 1         |
| ISLR      | 0.0002069    | -0.183843                                                                                                       | -5.43944                                                                                                         | 7.55624 | 108.308 | 50.1677    | 1         |
| LOC642956 | 0.0002111    | -28.0545                                                                                                        | 28.0545                                                                                                          | 7.53314 | 90.2542 | 41.9334    | 1         |
| NBL1      | 0.0002224    | 8.55766                                                                                                         | 8.55766                                                                                                          | 7.47407 | 142.538 | 66.7486    | 1         |
| SOX10     | 0.0002249    | -0.32659                                                                                                        | -3.06194                                                                                                         | 7.46096 | 242.159 | 113.599    | 1         |
| LOC387856 | 0.0002251    | -0.306024                                                                                                       | -3.26771                                                                                                         | 7.45995 | 57.8807 | 27.156     | 1         |
| C8orf34   | 0.0002348    | -0.14582                                                                                                        | -6.85777                                                                                                         | 7.41255 | 80.8648 | 38.1821    | 1         |
| ANXA2     | 0.000236     | -0.127365                                                                                                       | -7.85148                                                                                                         | 7.40671 | 160.768 | 75.97      | 1         |
| MSRB3     | 0.000242     | 0.0812471                                                                                                       | -12.3081                                                                                                         | 7.3786  | 99.9701 | 47.4203    | 1         |
| ARHGEF10L | 0.0002426    | -0.231701                                                                                                       | -4.31592                                                                                                         | 7.37562 | 42.4383 | 20.1385    | 1         |
| CAMK2B    | 0.0002455    | 98.9725                                                                                                         | 98.9725                                                                                                          | 7.36226 | 98.3089 | 46.7358    | 1         |
| ATF3      | 0.0002489    | 6.78266                                                                                                         | 6.78266                                                                                                          | 7.347   | 97.8506 | 46.6145    | 1         |
| MTUS1     | 0.0002604    | -0.183046                                                                                                       | -5.46312                                                                                                         | 7.29612 | 130.845 | 62.7675    | 1         |
| ATP2B2    | 0.0002605    | -0.0354416                                                                                                      | -28.2154                                                                                                         | 7.29573 | 72.6742 | 34.8642    | 1         |
| CAV2      | 0.0002607    | 0.25797                                                                                                         | -3.87642                                                                                                         | 7.29496 | 597.926 | 286.875    | 1         |
| PENK      | 0.0002712    | -3.17895                                                                                                        | 3.17895                                                                                                          | 7.25078 | 56.5217 | 27.2834    | 1         |
| VSNL1     | 0.0002758    | 0.300959                                                                                                        | -3.32271                                                                                                         | 7.23235 | 770.547 | 372.896    | 1         |
| AIF1L     | 0.0002779    | 0.227541                                                                                                        | -4.39481                                                                                                         | 7.22382 | 301.195 | 145.931    | 1         |
| AGR2      | 0.0002855    | 0.472347                                                                                                        | -2.11709                                                                                                         | 7.19398 | 48.1727 | 23.4369    | 1         |
| SYNM      | 0.0002868    | 0.090725                                                                                                        | -11.0223                                                                                                         | 7.189   | 160.509 | 78.1444    | 1         |
| DMRT2     | 0.0003022    | -0.310409                                                                                                       | -3.22155                                                                                                         | 7.13114 | 77.3162 | 37.9472    | 1         |
| LOC283755 | 0.0003126    | -77.1501                                                                                                        | 77.1501                                                                                                          | 7.0939  | 32.4543 | 16.0123    | 1         |
| ARPP-21   | 0.0003191    | 0.0543164                                                                                                       | -18.4106                                                                                                         | 7.07132 | 158.554 | 78.4772    | 1         |

| Gene ID      | p-value (Dx) | MeanRatio (DIPG vs. Astrocytoma and Ependymoma and Glioneural Tumor and JPA and Medulloblastoma and Meningioma) | FoldChange (DIPG vs. Astrocytoma and Ependymoma and Glioneural Tumor and JPA and Medulloblastoma and Meningioma) | F(Dx)   | SS(Dx)  | SS (Error) | F (Error) |
|--------------|--------------|-----------------------------------------------------------------------------------------------------------------|------------------------------------------------------------------------------------------------------------------|---------|---------|------------|-----------|
| HOXB6        | 0.0003192    | -4.0415                                                                                                         | 4.0415                                                                                                           | 7.07097 | 28.6076 | 14.1603    | 1         |
| SUSD1        | 0.0003219    | 0.486903                                                                                                        | -2.0538                                                                                                          | 7.06175 | 167.43  | 82.983     | 1         |
| ENDOD1       | 0.0003273    | 4.96669                                                                                                         | 4.96669                                                                                                          | 7.04334 | 103.82  | 51.5904    | 1         |
| CAV1         | 0.0003301    | 0.174608                                                                                                        | -5.72712                                                                                                         | 7.0341  | 272.039 | 135.36     | 1         |
| HOXD3        | 0.0003345    | -2.45312                                                                                                        | 2.45312                                                                                                          | 7.01962 | 56.8869 | 28.364     | 1         |
| PCDH17       | 0.0003429    | -0.296784                                                                                                       | -3.36945                                                                                                         | 6.99274 | 276.865 | 138.576    | 1         |
| KALRN        | 0.0003439    | -0.302244                                                                                                       | -3.30859                                                                                                         | 6.98956 | 26.484  | 13.2618    | 1         |
| MSRB3        | 0.0003476    | 0.000122508                                                                                                     | -8162.74                                                                                                         | 6.97788 | 73.252  | 36.7421    | 1         |
| BCAN         | 0.0003515    | -3.66722                                                                                                        | 3.66722                                                                                                          | 6.96575 | 504.635 | 253.558    | 1         |
| LOC100128675 | 0.0003553    | -0.279536                                                                                                       | -3.57736                                                                                                         | 6.95393 | 27.0446 | 13.6119    | 1         |
| C5orf23      | 0.0003747    | 0.290866                                                                                                        | -3.43801                                                                                                         | 6.89639 | 62.6982 | 31.8201    | 1         |
| DMD          | 0.0003758    | -0.202848                                                                                                       | -4.92979                                                                                                         | 6.89323 | 77.6452 | 39.424     | 1         |
| BNC2         | 0.0003783    | -0.149032                                                                                                       | -6.70996                                                                                                         | 6.886   | 146.773 | 74.6012    | 1         |
| ASPHD1       | 0.0003793    | 0.136855                                                                                                        | -7.30701                                                                                                         | 6.88306 | 55.6675 | 28.3067    | 1         |
| COL1A2       | 0.0003975    | 0.0761863                                                                                                       | -13.1257                                                                                                         | 6.83275 | 640.487 | 328.083    | 1         |
| SCRG1        | 0.0004038    | -0.0328861                                                                                                      | -30.408                                                                                                          | 6.81569 | 536.943 | 275.732    | 1         |
| SLCO3A1      | 0.0004222    | -715.297                                                                                                        | 715.297                                                                                                          | 6.76802 | 44.0876 | 22.7994    | 1         |
| CLDN10       | 0.0004305    | -10.6292                                                                                                        | 10.6292                                                                                                          | 6.74722 | 58.2647 | 30.2238    | 1         |
| FAM20C       | 0.000435     | -0.0841384                                                                                                      | -11.8852                                                                                                         | 6.7361  | 120.935 | 62.8364    | 1         |
| SH3GL2       | 0.0004443    | 0.334254                                                                                                        | -2.99174                                                                                                         | 6.71368 | 401.998 | 209.571    | 1         |
| PCBP4        | 0.0004484    | -93.1443                                                                                                        | 93.1443                                                                                                          | 6.70387 | 127.677 | 66.6583    | 1         |
| MYRIP        | 0.0004538    | -16.0088                                                                                                        | 16.0088                                                                                                          | 6.69112 | 26.4186 | 13.8191    | 1         |
| SYT15        | 0.0004538    | -0.0881756                                                                                                      | -11.341                                                                                                          | 6.69105 | 52.5087 | 27.4666    | 1         |
| LOC100133583 | 0.0004543    | 0.112839                                                                                                        | -8.86217                                                                                                         | 6.68998 | 137.542 | 71.9581    | 1         |
| ARRDC2       | 0.0004701    | -0.120857                                                                                                       | -8.27427                                                                                                         | 6.65355 | 60.0389 | 31.5825    | 1         |
| EMX2         | 0.0004766    | 2.71272                                                                                                         | 2.71272                                                                                                          | 6.63912 | 48.4122 | 25.5219    | 1         |
| HCLS1        | 0.0004847    | -0.215349                                                                                                       | -4.64361                                                                                                         | 6.62136 | 173.349 | 91.6308    | 1         |

| Gene ID  | p-value (Dx) | MeanRatio (DIPG vs. Astrocytoma and Ependymoma and Glioneural Tumor and JPA and Medulloblastoma and Meningioma) | FoldChange (DIPG vs. Astrocytoma and Ependymoma and Glioneural Tumor and JPA and Medulloblastoma and Meningioma) | F(Dx)   | SS(Dx)  | SS (Error) | F (Error) |
|----------|--------------|-----------------------------------------------------------------------------------------------------------------|------------------------------------------------------------------------------------------------------------------|---------|---------|------------|-----------|
| CPEB3    | 0.0004906    | -4.56023                                                                                                        | 4.56023                                                                                                          | 6.60857 | 64.243  | 34.0241    | 1         |
| RTKN     | 0.0004967    | -0.161225                                                                                                       | -6.20253                                                                                                         | 6.59548 | 185.196 | 98.2772    | 1         |
| GSN      | 0.000502     | -2.56836                                                                                                        | 2.56836                                                                                                          | 6.58425 | 141.825 | 75.3901    | 1         |
| SCN9A    | 0.0005024    | 0.421028                                                                                                        | -2.37514                                                                                                         | 6.58348 | 112.135 | 59.615     | 1         |
| TCTEX1D1 | 0.000506     | -0.0468336                                                                                                      | -21.3522                                                                                                         | 6.57587 | 149.751 | 79.7048    | 1         |
| NQO1     | 0.0005346    | -34.7058                                                                                                        | 34.7058                                                                                                          | 6.51818 | 78.392  | 42.0933    | 1         |
| BAALC    | 0.000546     | 0.0863456                                                                                                       | -11.5814                                                                                                         | 6.49617 | 188.358 | 101.483    | 1         |
| REPS2    | 0.0005543    | 50.1705                                                                                                         | 50.1705                                                                                                          | 6.48041 | 39.5485 | 21.3597    | 1         |
| PALM2    | 0.0005635    | 0.0659198                                                                                                       | -15.17                                                                                                           | 6.4632  | 87.4553 | 47.3594    | 1         |
| ANKRD18A | 0.0005664    | -0.0227911                                                                                                      | -43.8768                                                                                                         | 6.45796 | 42.8782 | 23.2386    | 1         |
| LTBR     | 0.0005669    | -0.29668                                                                                                        | -3.37064                                                                                                         | 6.45698 | 101.847 | 55.2061    | 1         |
| KCNT2    | 0.000575     | 0.498909                                                                                                        | -2.00437                                                                                                         | 6.44227 | 117.123 | 63.6316    | 1         |
| ECM1     | 0.000577     | 0.103675                                                                                                        | -9.64556                                                                                                         | 6.43864 | 208.853 | 113.531    | 1         |
| C1S      | 0.000585     | -0.289683                                                                                                       | -3.45205                                                                                                         | 6.42436 | 56.0471 | 30.5346    | 1         |
| COL6A3   | 0.0005855    | 0.0114704                                                                                                       | -87.1807                                                                                                         | 6.4234  | 223.955 | 122.029    | 1         |
| VSIG4    | 0.0006046    | -0.174541                                                                                                       | -5.72931                                                                                                         | 6.39014 | 91.8748 | 50.3216    | 1         |
| SGSM1    | 0.0006136    | -0.102579                                                                                                       | -9.7486                                                                                                          | 6.37481 | 83.7086 | 45.9591    | 1         |
| SLC35F3  | 0.0006143    | -0.27003                                                                                                        | -3.70329                                                                                                         | 6.37358 | 46.3038 | 25.4274    | 1         |
| VCAM1    | 0.0006209    | 0.275808                                                                                                        | -3.6257                                                                                                          | 6.36263 | 49.6101 | 27.2899    | 1         |
| COCH     | 0.0006428    | 0.444329                                                                                                        | -2.25059                                                                                                         | 6.32689 | 135.961 | 75.2129    | 1         |
| TMEM173  | 0.0006514    | -0.493035                                                                                                       | -2.02825                                                                                                         | 6.31315 | 75.6707 | 41.9517    | 1         |
| GREM1    | 0.00066      | 0.100751                                                                                                        | -9.9255                                                                                                          | 6.2996  | 26.8416 | 14.9129    | 1         |
| WFDC1    | 0.0006614    | 0.488199                                                                                                        | -2.04834                                                                                                         | 6.29744 | 144.444 | 80.279     | 1         |
| PLAU     | 0.0006704    | -0.423925                                                                                                       | -2.35891                                                                                                         | 6.28353 | 135.652 | 75.5597    | 1         |
| ANK3     | 0.0006731    | -0.0582005                                                                                                      | -17.182                                                                                                          | 6.27951 | 41.9049 | 23.3565    | 1         |
| PGM5     | 0.00068      | -0.396211                                                                                                       | -2.52391                                                                                                         | 6.26899 | 86.3932 | 48.2336    | 1         |
| SNX10    | 0.0006829    | 5.41435                                                                                                         | 5.41435                                                                                                          | 6.26461 | 101.157 | 56.5159    | 1         |

| Gene ID  | p-value (Dx) | MeanRatio (DIPG vs. Astrocytoma and Ependymoma and Glioneural Tumor and JPA and Medulloblastoma and Meningioma) | FoldChange (DIPG vs. Astrocytoma and Ependymoma and Glioneural Tumor and JPA and Medulloblastoma and Meningioma) | F(Dx)   | SS(Dx)  | SS (Error) | F (Error) |
|----------|--------------|-----------------------------------------------------------------------------------------------------------------|------------------------------------------------------------------------------------------------------------------|---------|---------|------------|-----------|
| SLC26A6  | 0.0006886    | 0.0062495                                                                                                       | -160.013                                                                                                         | 6.25623 | 81.0257 | 45.3292    | 1         |
| COL6A2   | 0.0007021    | 0.124231                                                                                                        | -8.04954                                                                                                         | 6.23631 | 70.8344 | 39.7543    | 1         |
| MEST     | 0.0007284    | -0.428123                                                                                                       | -2.33578                                                                                                         | 6.19881 | 52.7573 | 29.7881    | 1         |
| SCN1B    | 0.000734     | 4.84408                                                                                                         | 4.84408                                                                                                          | 6.19096 | 22.6952 | 12.8305    | 1         |
| CAPN3    | 0.0007377    | -5.76602                                                                                                        | 5.76602                                                                                                          | 6.18582 | 74.1294 | 41.9432    | 1         |
| PHACTR3  | 0.0007494    | 0.121594                                                                                                        | -8.22411                                                                                                         | 6.16987 | 441.003 | 250.169    | 1         |
| DMD      | 0.000753     | 0.152817                                                                                                        | -6.54375                                                                                                         | 6.16496 | 96.689  | 54.8927    | 1         |
| C9orf116 | 0.0007576    | -3.23337                                                                                                        | 3.23337                                                                                                          | 6.15884 | 79.4408 | 45.1453    | 1         |
| ATP10B   | 0.0007578    | 4.05081                                                                                                         | 4.05081                                                                                                          | 6.15853 | 155.758 | 88.5197    | 1         |
| MAPT     | 0.0007645    | -0.0222124                                                                                                      | -45.0199                                                                                                         | 6.14957 | 350.901 | 199.713    | 1         |
| C9orf116 | 0.0007714    | -16.0156                                                                                                        | 16.0156                                                                                                          | 6.14052 | 56.5911 | 32.256     | 1         |
| ADORA1   | 0.0007739    | 0.131937                                                                                                        | -7.5794                                                                                                          | 6.1373  | 149.606 | 85.3177    | 1         |
| APCDD1L  | 0.0008069    | 2.27536                                                                                                         | 2.27536                                                                                                          | 6.095   | 46.2776 | 26.5745    | 1         |
| B3GAT1   | 0.000809     | -0.0437634                                                                                                      | -22.8501                                                                                                         | 6.09245 | 185.846 | 106.765    | 1         |
| GAD1     | 0.0008231    | 0.431999                                                                                                        | -2.31482                                                                                                         | 6.07495 | 194.475 | 112.044    | 1         |
| ANXA2    | 0.0008239    | -0.371531                                                                                                       | -2.69156                                                                                                         | 6.074   | 304.193 | 175.284    | 1         |
| TRIM5    | 0.0008298    | -0.151917                                                                                                       | -6.58256                                                                                                         | 6.06681 | 101.126 | 58.3405    | 1         |
| DLC1     | 0.0008342    | -0.259771                                                                                                       | -3.84954                                                                                                         | 6.06143 | 83.8059 | 48.3913    | 1         |
| GRIK2    | 0.0008438    | 0.295738                                                                                                        | -3.38138                                                                                                         | 6.04997 | 99.2734 | 57.4312    | 1         |
| GBP2     | 0.000887     | 0.491568                                                                                                        | -2.03431                                                                                                         | 5.99988 | 175.501 | 102.377    | 1         |
| CAPS     | 0.0008883    | 0.23397                                                                                                         | -4.27405                                                                                                         | 5.99842 | 350.492 | 204.508    | 1         |
| PPP1R1B  | 0.0008924    | -0.0928464                                                                                                      | -10.7705                                                                                                         | 5.99386 | 242.07  | 141.352    | 1         |
| OPCML    | 0.0008978    | -0.331541                                                                                                       | -3.01622                                                                                                         | 5.98782 | 311.061 | 181.821    | 1         |
| SNCB     | 0.0009052    | 0.346309                                                                                                        | -2.8876                                                                                                          | 5.97957 | 57.406  | 33.6012    | 1         |
| ECM1     | 0.0009186    | -0.0101607                                                                                                      | -98.4186                                                                                                         | 5.96493 | 62.5798 | 36.7195    | 1         |
| PPIC     | 0.0009219    | 0.0662269                                                                                                       | -15.0996                                                                                                         | 5.96134 | 173.718 | 101.992    | 1         |
| IFIT3    | 0.0009241    | -0.485647                                                                                                       | -2.05911                                                                                                         | 5.95901 | 134.801 | 79.1749    | 1         |

| Gene ID   | p-value (Dx) | MeanRatio (DIPG vs. Astrocytoma and Ependymoma and Glioneural Tumor and JPA and Medulloblastoma and Meningioma) | FoldChange (DIPG vs. Astrocytoma and Ependymoma and Glioneural Tumor and JPA and Medulloblastoma and Meningioma) | F(Dx)   | SS(Dx)  | SS (Error) | F (Error) |
|-----------|--------------|-----------------------------------------------------------------------------------------------------------------|------------------------------------------------------------------------------------------------------------------|---------|---------|------------|-----------|
| COL8A2    | 0.0009246    | 0.145094                                                                                                        | -6.8921                                                                                                          | 5.95839 | 53.9695 | 31.702     | 1         |
| PTGDR     | 0.0009257    | 0.334493                                                                                                        | -2.9896                                                                                                          | 5.95726 | 39.6418 | 23.2903    | 1         |
| RAB11FIP1 | 0.0009284    | 0.114769                                                                                                        | -8.71313                                                                                                         | 5.95437 | 59.7525 | 35.1227    | 1         |
| ZNF385B   | 0.0009416    | -7.38125                                                                                                        | 7.38125                                                                                                          | 5.94028 | 35.4299 | 20.8752    | 1         |
| ARHGAP23  | 0.0009432    | -21.9928                                                                                                        | 21.9928                                                                                                          | 5.93862 | 60.8649 | 35.8715    | 1         |
| STMN4     | 0.0009497    | 0.151281                                                                                                        | -6.61024                                                                                                         | 5.93169 | 640.674 | 378.031    | 1         |
| ZNF385B   | 0.0009609    | -0.229577                                                                                                       | -4.35584                                                                                                         | 5.92013 | 47.5646 | 28.1203    | 1         |
| ACOT7     | 0.0009711    | -0.122402                                                                                                       | -8.1698                                                                                                          | 5.90963 | 76.394  | 45.2446    | 1         |
| RARRES1   | 0.000976     | 0.141603                                                                                                        | -7.06199                                                                                                         | 5.90463 | 83.3473 | 49.4045    | 1         |
| CD74      | 0.0009966    | -0.294714                                                                                                       | -3.39312                                                                                                         | 5.88394 | 135.521 | 80.6133    | 1         |
| GABRB1    | 0.0009996    | 0.209179                                                                                                        | -4.78061                                                                                                         | 5.88093 | 179.919 | 107.077    | 1         |
| FAM74A3   | 0.0010021    | -0.0873104                                                                                                      | -11.4534                                                                                                         | 5.87845 | 212.494 | 126.518    | 1         |
| THY1      | 0.0010419    | 0.291464                                                                                                        | -3.43095                                                                                                         | 5.83999 | 344.72  | 206.596    | 1         |
| HPCAL1    | 0.00105      | 0.0257287                                                                                                       | -38.8671                                                                                                         | 5.83233 | 38.9678 | 23.3847    | 1         |
| CPLX2     | 0.0010577    | -0.075079                                                                                                       | -13.3193                                                                                                         | 5.82514 | 29.8294 | 17.9228    | 1         |
| MAP4      | 0.0010611    | -29.7149                                                                                                        | 29.7149                                                                                                          | 5.82192 | 146.194 | 87.8882    | 1         |
| VGF       | 0.0010692    | -2.0561                                                                                                         | 2.0561                                                                                                           | 5.81442 | 490.534 | 295.278    | 1         |
| CPZ       | 0.0010703    | -0.432183                                                                                                       | -2.31383                                                                                                         | 5.8134  | 46.7185 | 28.1272    | 1         |
| SVIL      | 0.0010812    | 0.175499                                                                                                        | -5.69803                                                                                                         | 5.80345 | 126.93  | 76.5501    | 1         |
| NR3C2     | 0.0010819    | 8.20234                                                                                                         | 8.20234                                                                                                          | 5.80285 | 37.7596 | 22.7748    | 1         |
| MFAP5     | 0.0010892    | -0.00624147                                                                                                     | -160.219                                                                                                         | 5.79627 | 78.1898 | 47.2138    | 1         |
| VAMP1     | 0.0010892    | 0.0653632                                                                                                       | -15.2991                                                                                                         | 5.79623 | 83.7905 | 50.5961    | 1         |
| BEST3     | 0.0010929    | 0.463153                                                                                                        | -2.15911                                                                                                         | 5.79286 | 125.343 | 75.7313    | 1         |
| IFIT1     | 0.0011143    | -36.6229                                                                                                        | 36.6229                                                                                                          | 5.7739  | 52.0131 | 31.5291    | 1         |
| CYFIP2    | 0.0011392    | -0.0776873                                                                                                      | -12.8721                                                                                                         | 5.75221 | 138.407 | 84.2156    | 1         |
| DIO2      | 0.001167     | -17.0441                                                                                                        | 17.0441                                                                                                          | 5.72865 | 43.3009 | 26.4553    | 1         |
| FAM134B   | 0.0011705    | 2.04154                                                                                                         | 2.04154                                                                                                          | 5.72569 | 59.9757 | 36.6619    | 1         |



| Gene ID  | p-value (Dx) | MeanRatio (DIPG vs. Astrocytoma and Ependymoma and Glioneural Tumor and JPA and Medulloblastoma and Meningioma) | FoldChange (DIPG vs. Astrocytoma and Ependymoma and Glioneural Tumor and JPA and Medulloblastoma and Meningioma) | F(Dx)   | SS(Dx)  | SS (Error) | F (Error) |
|----------|--------------|-----------------------------------------------------------------------------------------------------------------|------------------------------------------------------------------------------------------------------------------|---------|---------|------------|-----------|
| IL18BP   | 0.0011709    | -0.0298235                                                                                                      | -33.5306                                                                                                         | 5.72536 | 121.664 | 74.3748    | 1         |
| OPRL1    | 0.0012069    | -0.13842                                                                                                        | -7.2244                                                                                                          | 5.69583 | 48.0859 | 29.548     | 1         |
| PPP2R2C  | 0.0012162    | -0.0184251                                                                                                      | -54.2739                                                                                                         | 5.68838 | 611.952 | 376.527    | 1         |
| L1CAM    | 0.0012295    | -0.0585964                                                                                                      | -17.0659                                                                                                         | 5.67777 | 27.5304 | 16.9708    | 1         |
| VSTM2B   | 0.0012369    | -0.0977819                                                                                                      | -10.2268                                                                                                         | 5.67198 | 108.186 | 66.7582    | 1         |
| C10orf85 | 0.0012971    | 0.253445                                                                                                        | -3.94563                                                                                                         | 5.62587 | 75.7833 | 47.1468    | 1         |
| ANXA2    | 0.0013116    | -0.0333336                                                                                                      | -29.9997                                                                                                         | 5.61509 | 55.8486 | 34.8116    | 1         |
| CAPS     | 0.0013587    | 0.415493                                                                                                        | -2.40678                                                                                                         | 5.58107 | 202.9   | 127.242    | 1         |
| TNFAIP3  | 0.001374     | 0.413596                                                                                                        | -2.41782                                                                                                         | 5.57024 | 72.2289 | 45.3843    | 1         |
| SGK3     | 0.0013787    | 9.00653                                                                                                         | 9.00653                                                                                                          | 5.56695 | 41.9242 | 26.3582    | 1         |
| SORBS1   | 0.0013901    | -0.208206                                                                                                       | -4.80293                                                                                                         | 5.55901 | 75.3374 | 47.433     | 1         |
| WDR7     | 0.001405     | 15.1819                                                                                                         | 15.1819                                                                                                          | 5.54881 | 26.1926 | 16.5214    | 1         |
| DSE      | 0.0014087    | -0.185714                                                                                                       | -5.38464                                                                                                         | 5.54628 | 125.608 | 79.2654    | 1         |
| FABP5    | 0.0014133    | 0.219426                                                                                                        | -4.55735                                                                                                         | 5.54313 | 208.176 | 131.445    | 1         |
| SEZ6L2   | 0.0014253    | -0.0355662                                                                                                      | -28.1166                                                                                                         | 5.53504 | 170.481 | 107.801    | 1         |
| CCL2     | 0.0014404    | -3.64783                                                                                                        | 3.64783                                                                                                          | 5.52491 | 130.773 | 82.8437    | 1         |
| NEUROD2  | 0.0014485    | 0.011388                                                                                                        | -87.8115                                                                                                         | 5.51954 | 26.6904 | 16.9246    | 1         |
| AGTPBP1  | 0.0014559    | -0.120567                                                                                                       | -8.29413                                                                                                         | 5.51462 | 67.8608 | 43.0697    | 1         |
| ANK2     | 0.0014712    | 1897.74                                                                                                         | 1897.74                                                                                                          | 5.50465 | 43.2068 | 27.472     | 1         |
| RRAGB    | 0.0014779    | -5.33945                                                                                                        | 5.33945                                                                                                          | 5.50029 | 91.8897 | 58.4722    | 1         |
| MYBPC1   | 0.0015067    | 3.3324                                                                                                          | 3.3324                                                                                                           | 5.48183 | 30.9699 | 19.7735    | 1         |
| CTSL2    | 0.0015214    | -0.314404                                                                                                       | -3.18062                                                                                                         | 5.47256 | 51.8979 | 33.1915    | 1         |
| ANKRD37  | 0.001542     | -0.062305                                                                                                       | -16.0501                                                                                                         | 5.45973 | 136.766 | 87.6748    | 1         |
| ABCA9    | 0.0015695    | 0.462039                                                                                                        | -2.16432                                                                                                         | 5.44291 | 29.0608 | 18.6872    | 1         |
| FGF1     | 0.0015715    | 3.8604                                                                                                          | 3.8604                                                                                                           | 5.44168 | 29.0279 | 18.6702    | 1         |
| TRIM47   | 0.001582     | 2.29875                                                                                                         | 2.29875                                                                                                          | 5.43536 | 54.0328 | 34.7934    | 1         |
| FAM134B  | 0.0015911    | 5.16281                                                                                                         | 5.16281                                                                                                          | 5.42986 | 79.5613 | 51.2839    | 1         |

| Gene ID  | p-value (Dx) | MeanRatio (DIPG vs. Astrocytoma and Ependymoma and Glioneural Tumor and JPA and Medulloblastoma and Meningioma) | FoldChange (DIPG vs. Astrocytoma and Ependymoma and Glioneural Tumor and JPA and Medulloblastoma and Meningioma) | F(Dx)   | SS(Dx)  | SS (Error) | F (Error) |
|----------|--------------|-----------------------------------------------------------------------------------------------------------------|------------------------------------------------------------------------------------------------------------------|---------|---------|------------|-----------|
| KNDC1    | 0.0015963    | 0.143425                                                                                                        | -6.97228                                                                                                         | 5.42678 | 34.073  | 21.9754    | 1         |
| MS4A6A   | 0.0016166    | -0.0599887                                                                                                      | -16.6698                                                                                                         | 5.41479 | 173.991 | 112.464    | 1         |
| MS4A6A   | 0.0016347    | -0.032833                                                                                                       | -30.4571                                                                                                         | 5.40419 | 196.001 | 126.939    | 1         |
| FBLN5    | 0.0016685    | 0.122542                                                                                                        | -8.16048                                                                                                         | 5.38483 | 60.993  | 39.6439    | 1         |
| HLA-DRB5 | 0.0016817    | -4.11631                                                                                                        | 4.11631                                                                                                          | 5.37735 | 160.517 | 104.477    | 1         |
| C1RL     | 0.0017035    | -0.168022                                                                                                       | -5.95159                                                                                                         | 5.36516 | 81.3962 | 53.0994    | 1         |
| KLF2     | 0.0017072    | 0.130675                                                                                                        | -7.6526                                                                                                          | 5.36313 | 147.699 | 96.389     | 1         |
| C9orf117 | 0.0017149    | 0.201735                                                                                                        | -4.957                                                                                                           | 5.35886 | 100.699 | 65.7687    | 1         |
| C11orf41 | 0.00172      | -20.1806                                                                                                        | 20.1806                                                                                                          | 5.35607 | 137.054 | 89.5598    | 1         |
| NHEDC2   | 0.0017208    | 0.0293294                                                                                                       | -34.0954                                                                                                         | 5.35564 | 74.3327 | 48.5777    | 1         |
| OLFM1    | 0.0017336    | 0.00243202                                                                                                      | -411.181                                                                                                         | 5.34864 | 973.65  | 637.129    | 1         |
| EPHA5    | 0.0017771    | 0.0380537                                                                                                       | -26.2787                                                                                                         | 5.32529 | 46.6511 | 30.661     | 1         |
| PAPPA    | 0.0017907    | -0.046565                                                                                                       | -21.4753                                                                                                         | 5.31808 | 49.3322 | 32.4671    | 1         |
| PALM     | 0.0018054    | 0.0359464                                                                                                       | -27.8192                                                                                                         | 5.31041 | 42.3447 | 27.9087    | 1         |
| FBLN5    | 0.0018192    | 0.166587                                                                                                        | -6.00289                                                                                                         | 5.30323 | 86.4197 | 57.0348    | 1         |
| AJAP1    | 0.0018241    | -0.239434                                                                                                       | -4.17651                                                                                                         | 5.30073 | 54.9418 | 36.2773    | 1         |
| MLKL     | 0.0018552    | 0.355484                                                                                                        | -2.81307                                                                                                         | 5.28486 | 34.6985 | 22.9798    | 1         |
| MXRA7    | 0.0018562    | -0.0749903                                                                                                      | -13.3351                                                                                                         | 5.28436 | 182.287 | 120.734    | 1         |
| DSC3     | 0.00186      | 0.154124                                                                                                        | -6.4883                                                                                                          | 5.28245 | 38.6484 | 25.6073    | 1         |
| SELENBP1 | 0.0018751    | -4.85145                                                                                                        | 4.85145                                                                                                          | 5.27483 | 44.9283 | 29.8112    | 1         |
| NSF      | 0.001888     | 31.853                                                                                                          | 31.853                                                                                                           | 5.26841 | 27.9324 | 18.5565    | 1         |
| HOXB2    | 0.0019012    | 5.9611                                                                                                          | 5.9611                                                                                                           | 5.26192 | 60.5872 | 40.3       | 1         |
| PDPK1    | 0.0019016    | -12.5493                                                                                                        | 12.5493                                                                                                          | 5.26172 | 26.2939 | 17.4902    | 1         |
| TPPP3    | 0.0019406    | -28.1843                                                                                                        | 28.1843                                                                                                          | 5.24271 | 26.6613 | 17.7989    | 1         |
| INADL    | 0.0019485    | -0.0976492                                                                                                      | -10.2407                                                                                                         | 5.23894 | 48.5886 | 32.4608    | 1         |
| CPEB1    | 0.0019662    | 0.0200871                                                                                                       | -49.7831                                                                                                         | 5.23046 | 50.275  | 33.6419    | 1         |
| LPHN1    | 0.0019754    | 0.0208022                                                                                                       | -48.0718                                                                                                         | 5.22614 | 61.3932 | 41.1157    | 1         |

| Gene ID   | p-value (Dx) | MeanRatio (DIPG vs. Astrocytoma and Ependymoma and Glioneural Tumor and JPA and Medulloblastoma and Meningioma) | FoldChange (DIPG vs. Astrocytoma and Ependymoma and Glioneural Tumor and JPA and Medulloblastoma and Meningioma) | F(Dx)   | SS(Dx)  | SS (Error) | F (Error) |
|-----------|--------------|-----------------------------------------------------------------------------------------------------------------|------------------------------------------------------------------------------------------------------------------|---------|---------|------------|-----------|
| TDP1      | 0.0019795    | 0.0930105                                                                                                       | -10.7515                                                                                                         | 5.22419 | 50.0861 | 33.5557    | 1         |
| VTN       | 0.0020245    | -0.272661                                                                                                       | -3.66756                                                                                                         | 5.20324 | 36.9485 | 24.8537    | 1         |
| TBX15     | 0.0020329    | -0.0440852                                                                                                      | -22.6833                                                                                                         | 5.19941 | 45.9729 | 30.9468    | 1         |
| FABP5L2   | 0.0020666    | 2.50905                                                                                                         | 2.50905                                                                                                          | 5.18408 | 346.594 | 234.001    | 1         |
| CACNB2    | 0.0020853    | -12.8026                                                                                                        | 12.8026                                                                                                          | 5.17573 | 25.4676 | 17.2221    | 1         |
| PGM5      | 0.0020877    | -0.425419                                                                                                       | -2.35062                                                                                                         | 5.17466 | 73.0977 | 49.4413    | 1         |
| AKAP11    | 0.0020887    | -3.70495                                                                                                        | 3.70495                                                                                                          | 5.17422 | 59.0331 | 39.9318    | 1         |
| LOC440585 | 0.0020922    | 0.185724                                                                                                        | -5.38432                                                                                                         | 5.17267 | 400.476 | 270.976    | 1         |
| C11orf41  | 0.0020935    | -0.0304021                                                                                                      | -32.8925                                                                                                         | 5.17209 | 182.914 | 123.779    | 1         |
| INADL     | 0.0021389    | 0.407456                                                                                                        | -2.45425                                                                                                         | 5.15217 | 39.7907 | 27.0308    | 1         |
| LOC392871 | 0.0021454    | -0.291604                                                                                                       | -3.42931                                                                                                         | 5.14936 | 35.493  | 24.1244    | 1         |
| TWIST1    | 0.0021739    | -0.128407                                                                                                       | -7.78773                                                                                                         | 5.13717 | 84.5464 | 57.6022    | 1         |
| LDB3      | 0.0021816    | -0.0700654                                                                                                      | -14.2724                                                                                                         | 5.13388 | 22.7904 | 15.5372    | 1         |
| MYT1L     | 0.0022169    | 0.243966                                                                                                        | -4.09893                                                                                                         | 5.11903 | 113.651 | 77.7056    | 1         |
| FABP5     | 0.0022435    | -49.8556                                                                                                        | 49.8556                                                                                                          | 5.10803 | 137.489 | 94.2066    | 1         |
| SLC13A4   | 0.0022492    | -0.0172208                                                                                                      | -58.0692                                                                                                         | 5.1057  | 38.3835 | 26.3122    | 1         |
| C11orf70  | 0.0022698    | 0.119954                                                                                                        | -8.3365                                                                                                          | 5.09729 | 70.4766 | 48.392     | 1         |
| SLCO1A2   | 0.0023132    | 0.022598                                                                                                        | -44.2517                                                                                                         | 5.07981 | 23.3778 | 16.1073    | 1         |
| SPOCK1    | 0.0023412    | 0.338538                                                                                                        | -2.95388                                                                                                         | 5.06874 | 549.859 | 379.681    | 1         |
| TNFRSF1A  | 0.0023664    | 0.364939                                                                                                        | -2.74018                                                                                                         | 5.05891 | 94.6775 | 65.5025    | 1         |
| CD163     | 0.0024081    | -0.109789                                                                                                       | -9.1084                                                                                                          | 5.04288 | 109.307 | 75.8644    | 1         |
| GPNMB     | 0.0024624    | 0.156824                                                                                                        | -6.37656                                                                                                         | 5.02244 | 586.66  | 408.827    | 1         |
| CALN1     | 0.0024804    | -0.220715                                                                                                       | -4.53072                                                                                                         | 5.01579 | 91.4862 | 63.8388    | 1         |
| GRM3      | 0.0024933    | 0.37039                                                                                                         | -2.69986                                                                                                         | 5.01104 | 397.521 | 277.652    | 1         |
| PDE4B     | 0.0024986    | -0.187158                                                                                                       | -5.34308                                                                                                         | 5.0091  | 163.557 | 114.282    | 1         |
| MGLL      | 0.0025019    | 0.160281                                                                                                        | -6.23903                                                                                                         | 5.00788 | 71.6684 | 50.089     | 1         |
| TNFAIP8   | 0.0025059    | 0.00816885                                                                                                      | -122.416                                                                                                         | 5.00644 | 46.4351 | 32.4627    | 1         |

| Gene ID      | p-value (Dx) | MeanRatio (DIPG vs. Astrocytoma and Ependymoma and Glioneural Tumor and JPA and Medulloblastoma and Meningioma) | FoldChange (DIPG vs. Astrocytoma and Ependymoma and Glioneural Tumor and JPA and Medulloblastoma and Meningioma) | F(Dx)   | SS(Dx)  | SS (Error) | F (Error) |
|--------------|--------------|-----------------------------------------------------------------------------------------------------------------|------------------------------------------------------------------------------------------------------------------|---------|---------|------------|-----------|
| HOXB6        | 0.0025152    | -0.107716                                                                                                       | -9.28369                                                                                                         | 5.00303 | 25.9765 | 18.1725    | 1         |
| GPNMB        | 0.0025476    | 0.19226                                                                                                         | -5.2013                                                                                                          | 4.99135 | 357.742 | 250.853    | 1         |
| KIAA1324L    | 0.0025918    | 4.5983                                                                                                          | 4.5983                                                                                                           | 4.97567 | 99.6167 | 70.0727    | 1         |
| AAK1         | 0.002604     | -0.0694024                                                                                                      | -14.4087                                                                                                         | 4.97139 | 24.3999 | 17.1782    | 1         |
| FAM183A      | 0.0026346    | 0.16886                                                                                                         | -5.92207                                                                                                         | 4.96075 | 125.243 | 88.3637    | 1         |
| S100A11      | 0.0026554    | -0.462521                                                                                                       | -2.16206                                                                                                         | 4.9536  | 80.8114 | 57.0978    | 1         |
| HLA-DPA1     | 0.0027029    | 0.14479                                                                                                         | -6.90655                                                                                                         | 4.93746 | 279.347 | 198.019    | 1         |
| ARPC1B       | 0.0027205    | -0.336999                                                                                                       | -2.96737                                                                                                         | 4.93158 | 49.0064 | 34.7804    | 1         |
| SLC25A43     | 0.0027277    | 0.308367                                                                                                        | -3.24288                                                                                                         | 4.92919 | 67.6705 | 48.0498    | 1         |
| NR2F2        | 0.0027802    | 0.230778                                                                                                        | -4.33317                                                                                                         | 4.9119  | 111.212 | 79.2445    | 1         |
| INADL        | 0.0027826    | 0.343601                                                                                                        | -2.91035                                                                                                         | 4.91112 | 137.027 | 97.6548    | 1         |
| PRKCDBP      | 0.0027917    | 14.175                                                                                                          | 14.175                                                                                                           | 4.90814 | 67.3248 | 48.0093    | 1         |
| RTN4         | 0.0028014    | 7.47061                                                                                                         | 7.47061                                                                                                          | 4.905   | 28.1773 | 20.1061    | 1         |
| RNASE6       | 0.0028041    | -0.0439106                                                                                                      | -22.7735                                                                                                         | 4.90415 | 66.1726 | 47.2261    | 1         |
| C11orf70     | 0.0028203    | 0.0120123                                                                                                       | -83.2479                                                                                                         | 4.89894 | 79.4393 | 56.7547    | 1         |
| TPM1         | 0.0028241    | 0.154083                                                                                                        | -6.49001                                                                                                         | 4.89771 | 122.889 | 87.8187    | 1         |
| IFIT3        | 0.0028415    | -3.70864                                                                                                        | 3.70864                                                                                                          | 4.89215 | 77.7633 | 55.6343    | 1         |
| ANGPTL4      | 0.0028434    | -0.139895                                                                                                       | -7.14821                                                                                                         | 4.89154 | 81.6302 | 58.4082    | 1         |
| HOXA2        | 0.0028989    | -3.24165                                                                                                        | 3.24165                                                                                                          | 4.87408 | 177.747 | 127.637    | 1         |
| MYT1L        | 0.0029452    | 3.02145                                                                                                         | 3.02145                                                                                                          | 4.8598  | 71.1292 | 51.2269    | 1         |
| LOC100129958 | 0.0029724    | -0.18572                                                                                                        | -5.38445                                                                                                         | 4.8515  | 23.1845 | 16.7259    | 1         |
| ARHGAP23     | 0.0029847    | -0.110712                                                                                                       | -9.03242                                                                                                         | 4.84777 | 142.31  | 102.745    | 1         |
| GARNL4       | 0.003009     | 0.0184461                                                                                                       | -54.212                                                                                                          | 4.84049 | 106.656 | 77.1197    | 1         |
| C1orf194     | 0.0030117    | -0.163033                                                                                                       | -6.13372                                                                                                         | 4.83968 | 263.436 | 190.514    | 1         |
| RARRES1      | 0.0030588    | 0.145407                                                                                                        | -6.87723                                                                                                         | 4.82573 | 50.3406 | 36.511     | 1         |
| FCGBP        | 0.0030642    | 0.372644                                                                                                        | -2.68353                                                                                                         | 4.82414 | 179.113 | 129.949    | 1         |
| AHNAK        | 0.0030713    | 0.0150978                                                                                                       | -66.2348                                                                                                         | 4.82204 | 102.202 | 74.1815    | 1         |

| Gene ID  | p-value (Dx) | MeanRatio (DIPG vs. Astrocytoma and Ependymoma and Glioneural Tumor and JPA and Medulloblastoma and Meningioma) | FoldChange (DIPG vs. Astrocytoma and Ependymoma and Glioneural Tumor and JPA and Medulloblastoma and Meningioma) | F(Dx)   | SS(Dx)  | SS (Error) | F (Error) |
|----------|--------------|-----------------------------------------------------------------------------------------------------------------|------------------------------------------------------------------------------------------------------------------|---------|---------|------------|-----------|
| RAC2     | 0.0030771    | -0.211347                                                                                                       | -4.73156                                                                                                         | 4.82035 | 58.3372 | 42.358     | 1         |
| SYT7     | 0.0030968    | -31.2209                                                                                                        | 31.2209                                                                                                          | 4.81462 | 136.24  | 99.0399    | 1         |
| OSBPL1A  | 0.0031031    | 0.0684256                                                                                                       | -14.6144                                                                                                         | 4.81279 | 96.9282 | 70.489     | 1         |
| OLFML3   | 0.0031246    | -0.39107                                                                                                        | -2.55708                                                                                                         | 4.80661 | 124.262 | 90.4834    | 1         |
| MUTYH    | 0.0032293    | -0.313429                                                                                                       | -3.19051                                                                                                         | 4.77708 | 66.1208 | 48.4444    | 1         |
| P2RX7    | 0.0032303    | 0.1276                                                                                                          | -7.83697                                                                                                         | 4.7768  | 151.291 | 110.852    | 1         |
| SH2D5    | 0.0032892    | -0.0641693                                                                                                      | -15.5838                                                                                                         | 4.76065 | 21.5851 | 15.8692    | 1         |
| ERBB3    | 0.0033097    | -0.114938                                                                                                       | -8.70038                                                                                                         | 4.75509 | 123.491 | 90.8963    | 1         |
| PLCB1    | 0.0033165    | -16.1955                                                                                                        | 16.1955                                                                                                          | 4.75327 | 41.603  | 30.6338    | 1         |
| CYB5R2   | 0.0033409    | 0.0266418                                                                                                       | -37.5349                                                                                                         | 4.74671 | 58.2299 | 42.936     | 1         |
| AKAP12   | 0.0033506    | 0.0961372                                                                                                       | -10.4018                                                                                                         | 4.74414 | 112.595 | 83.0672    | 1         |
| NEBL     | 0.0033656    | -2.39999                                                                                                        | 2.39999                                                                                                          | 4.74016 | 52.8832 | 39.0475    | 1         |
| CADM4    | 0.0033659    | -0.268705                                                                                                       | -3.72156                                                                                                         | 4.74007 | 142.137 | 104.952    | 1         |
| BTG2     | 0.0033815    | 0.134588                                                                                                        | -7.43008                                                                                                         | 4.73597 | 110.677 | 81.7933    | 1         |
| VWA5A    | 0.0034854    | 0.333911                                                                                                        | -2.99481                                                                                                         | 4.70902 | 64.1275 | 47.6631    | 1         |
| FBLN1    | 0.0035036    | -0.153832                                                                                                       | -6.5006                                                                                                          | 4.70439 | 70.5801 | 52.5106    | 1         |
| SCG5     | 0.0035093    | 0.197424                                                                                                        | -5.06525                                                                                                         | 4.70294 | 708.335 | 527.154    | 1         |
| CHN2     | 0.00352      | -133.977                                                                                                        | 133.977                                                                                                          | 4.70023 | 72.7152 | 54.1469    | 1         |
| HLA-DQA1 | 0.0035446    | 0.150516                                                                                                        | -6.64382                                                                                                         | 4.69406 | 256.737 | 191.429    | 1         |
| TIAM2    | 0.0035534    | -0.143743                                                                                                       | -6.95687                                                                                                         | 4.69185 | 76.7109 | 57.2243    | 1         |
| BMP6     | 0.0036664    | -0.140994                                                                                                       | -7.09253                                                                                                         | 4.66412 | 65.1718 | 48.9055    | 1         |
| NWD1     | 0.0036851    | 6.10976                                                                                                         | 6.10976                                                                                                          | 4.65961 | 90.1867 | 67.7424    | 1         |
| ALDH1L2  | 0.003706     | 0.405842                                                                                                        | -2.46401                                                                                                         | 4.65462 | 43.2823 | 32.5457    | 1         |
| SLC12A5  | 0.0037934    | 4.89085                                                                                                         | 4.89085                                                                                                          | 4.63402 | 555.179 | 419.317    | 1         |
| SH3TC2   | 0.0037956    | 0.0256665                                                                                                       | -38.9613                                                                                                         | 4.6335  | 20.2753 | 15.3153    | 1         |
| TJP2     | 0.0038109    | 15.2814                                                                                                         | 15.2814                                                                                                          | 4.62997 | 25.9073 | 19.5845    | 1         |
| GFRA1    | 0.0038177    | 0.405089                                                                                                        | -2.46859                                                                                                         | 4.62839 | 43.0723 | 32.5713    | 1         |

| Gene ID   | p-value (Dx) | MeanRatio (DIPG vs. Astrocytoma and Ependymoma and Glioneural Tumor and JPA and Medulloblastoma and Meningioma) | FoldChange (DIPG vs. Astrocytoma and Ependymoma and Glioneural Tumor and JPA and Medulloblastoma and Meningioma) | F(Dx)   | SS(Dx)  | SS (Error) | F (Error) |
|-----------|--------------|-----------------------------------------------------------------------------------------------------------------|------------------------------------------------------------------------------------------------------------------|---------|---------|------------|-----------|
| SMAD6     | 0.0038437    | 0.38556                                                                                                         | -2.59363                                                                                                         | 4.6224  | 63.2332 | 47.879     | 1         |
| MAG       | 0.0038657    | 0.452693                                                                                                        | -2.209                                                                                                           | 4.61738 | 1649.98 | 1250.69    | 1         |
| LOC642956 | 0.0038748    | -0.148167                                                                                                       | -6.74914                                                                                                         | 4.6153  | 124.581 | 94.476     | 1         |
| C5orf4    | 0.0038831    | 34.195                                                                                                          | 34.195                                                                                                           | 4.61341 | 36.0866 | 27.3774    | 1         |
| BRUNOL4   | 0.0039238    | -0.0817798                                                                                                      | -12.228                                                                                                          | 4.60423 | 21.3484 | 16.2284    | 1         |
| FAM69A    | 0.0039391    | 0.0184621                                                                                                       | -54.1651                                                                                                         | 4.60081 | 93.4014 | 71.0537    | 1         |
| RPESP     | 0.0039684    | -2.0286                                                                                                         | 2.0286                                                                                                           | 4.5943  | 236.553 | 180.209    | 1         |
| ANPEP     | 0.0039804    | 0.430554                                                                                                        | -2.32259                                                                                                         | 4.59163 | 29.3367 | 22.3621    | 1         |
| FGF1      | 0.0039881    | 0.221911                                                                                                        | -4.50632                                                                                                         | 4.58994 | 59.1964 | 45.1394    | 1         |
| BAIAP2    | 0.003993     | -0.0584388                                                                                                      | -17.1119                                                                                                         | 4.58886 | 22.4068 | 17.0901    | 1         |
| VIP       | 0.0040139    | 2.09758                                                                                                         | 2.09758                                                                                                          | 4.58427 | 15.0379 | 11.4811    | 1         |
| C14orf139 | 0.0041135    | -0.0915166                                                                                                      | -10.927                                                                                                          | 4.56276 | 37.4183 | 28.7028    | 1         |
| IL13RA1   | 0.004135     | -0.104889                                                                                                       | -9.53393                                                                                                         | 4.55819 | 126.72  | 97.3018    | 1         |
| HSPA12A   | 0.0041899    | -0.0771929                                                                                                      | -12.9546                                                                                                         | 4.54664 | 201.536 | 155.142    | 1         |
| HOXA2     | 0.0042056    | -2.64018                                                                                                        | 2.64018                                                                                                          | 4.54337 | 140.667 | 108.363    | 1         |
| SNAI2     | 0.0042408    | 0.302448                                                                                                        | -3.30635                                                                                                         | 4.53608 | 45.499  | 35.1066    | 1         |
| ASPHD1    | 0.0042452    | 3.76188                                                                                                         | 3.76188                                                                                                          | 4.53518 | 31.3021 | 24.1572    | 1         |
| ARMC3     | 0.0042528    | 0.294871                                                                                                        | -3.39131                                                                                                         | 4.53361 | 142.96  | 110.367    | 1         |
| STXBP1    | 0.0042997    | 0.24998                                                                                                         | -4.00032                                                                                                         | 4.52403 | 75.2872 | 58.2457    | 1         |
| TCEAL6    | 0.0043113    | 3.61916                                                                                                         | 3.61916                                                                                                          | 4.52167 | 51.235  | 39.6585    | 1         |
| GRIA2     | 0.0043993    | 0.136829                                                                                                        | -7.30839                                                                                                         | 4.50405 | 575.721 | 447.381    | 1         |
| PPP2R2C   | 0.0044028    | 0.104989                                                                                                        | -9.52478                                                                                                         | 4.50334 | 262.853 | 204.289    | 1         |
| CHN1      | 0.004436     | -30.432                                                                                                         | 30.432                                                                                                           | 4.49681 | 239.994 | 186.795    | 1         |
| LEPR      | 0.004465     | -0.0857288                                                                                                      | -11.6647                                                                                                         | 4.49113 | 32.132  | 25.0409    | 1         |
| A2BP1     | 0.004485     | -0.0813568                                                                                                      | -12.2915                                                                                                         | 4.48725 | 33.0489 | 25.7778    | 1         |
| SPOCD1    | 0.0045114    | 2.93968                                                                                                         | 2.93968                                                                                                          | 4.48214 | 127.149 | 99.2879    | 1         |
| RECK      | 0.0045332    | -0.237422                                                                                                       | -4.21191                                                                                                         | 4.47793 | 76.6751 | 59.93      | 1         |

| Gene ID   | p-value (Dx) | MeanRatio (DIPG vs. Astrocytoma and Ependymoma and Glioneural Tumor and JPA and Medulloblastoma and Meningioma) | FoldChange (DIPG vs. Astrocytoma and Ependymoma and Glioneural Tumor and JPA and Medulloblastoma and Meningioma) | F(Dx)   | SS(Dx)  | SS (Error) | F (Error) |
|-----------|--------------|-----------------------------------------------------------------------------------------------------------------|------------------------------------------------------------------------------------------------------------------|---------|---------|------------|-----------|
| LOC730415 | 0.0045369    | -0.0938831                                                                                                      | -10.6515                                                                                                         | 4.47724 | 212.897 | 166.429    | 1         |
| MAN1C1    | 0.0045374    | -0.46055                                                                                                        | -2.17132                                                                                                         | 4.47713 | 142.435 | 111.348    | 1         |
| IFIT3     | 0.004567     | -15.3633                                                                                                        | 15.3633                                                                                                          | 4.47148 | 47.0375 | 36.818     | 1         |
| MAGEE1    | 0.0046383    | 0.440666                                                                                                        | -2.26929                                                                                                         | 4.45803 | 85.7357 | 67.3111    | 1         |
| CAMKK2    | 0.0046579    | 0.403879                                                                                                        | -2.47599                                                                                                         | 4.45436 | 29.1399 | 22.8966    | 1         |
| PHLDB2    | 0.0046641    | -0.117473                                                                                                       | -8.51257                                                                                                         | 4.45322 | 35.1783 | 27.6483    | 1         |
| PTGER4    | 0.0047225    | 0.186372                                                                                                        | -5.36561                                                                                                         | 4.44243 | 65.281  | 51.4321    | 1         |
| GDPD5     | 0.0047574    | -0.368663                                                                                                       | -2.71251                                                                                                         | 4.43605 | 47.758  | 37.6806    | 1         |
| FGF14     | 0.0047669    | 2.17703                                                                                                         | 2.17703                                                                                                          | 4.43432 | 60.1759 | 47.4967    | 1         |
| CENTA1    | 0.004795     | 0.470222                                                                                                        | -2.12665                                                                                                         | 4.42924 | 414.288 | 327.372    | 1         |
| SLCO1A2   | 0.004801     | -0.111918                                                                                                       | -8.93509                                                                                                         | 4.42815 | 43.2046 | 34.1488    | 1         |
| PRKCB     | 0.0048241    | 0.369406                                                                                                        | -2.70705                                                                                                         | 4.42401 | 168.507 | 133.312    | 1         |
| ALOX5AP   | 0.0048604    | -0.0139347                                                                                                      | -71.7635                                                                                                         | 4.41752 | 197.708 | 156.644    | 1         |
| PLTP      | 0.004879     | -0.44559                                                                                                        | -2.24422                                                                                                         | 4.4142  | 41.0833 | 32.5747    | 1         |
| LPPR4     | 0.0049549    | 4.54335                                                                                                         | 4.54335                                                                                                          | 4.40089 | 78.3296 | 62.2951    | 1         |
| TMEM20    | 0.0049555    | -0.0367043                                                                                                      | -27.2448                                                                                                         | 4.40077 | 41.4839 | 32.9927    | 1         |
| CYBB      | 0.0049978    | -0.304396                                                                                                       | -3.28519                                                                                                         | 4.39344 | 60.0013 | 47.7996    | 1         |
| ANKS1B    | 0.0050359    | 0.0316174                                                                                                       | -31.6281                                                                                                         | 4.38689 | 455.867 | 363.705    | 1         |
| C7orf57   | 0.0050453    | 0.35938                                                                                                         | -2.78257                                                                                                         | 4.38528 | 52.7023 | 42.063     | 1         |
| DNM3      | 0.0050575    | 0.0830897                                                                                                       | -12.0352                                                                                                         | 4.3832  | 264.057 | 210.851    | 1         |
| RRAS      | 0.0050877    | -0.392101                                                                                                       | -2.55036                                                                                                         | 4.37807 | 50.5872 | 40.4414    | 1         |
| RND2      | 0.0051324    | 0.487077                                                                                                        | -2.05306                                                                                                         | 4.37055 | 92.643  | 74.1898    | 1         |
| FLJ22662  | 0.0052016    | -0.0776749                                                                                                      | -12.8742                                                                                                         | 4.35903 | 68.6015 | 55.0823    | 1         |
| SYTL2     | 0.005236     | 0.171233                                                                                                        | -5.83999                                                                                                         | 4.35336 | 109.654 | 88.1589    | 1         |
| CRTAP     | 0.0052385    | -0.134584                                                                                                       | -7.43032                                                                                                         | 4.35296 | 99.0677 | 79.6555    | 1         |
| C12orf28  | 0.0052387    | -2.71523                                                                                                        | 2.71523                                                                                                          | 4.35291 | 67.483  | 54.2604    | 1         |
| LOC728650 | 0.0052419    | -3.05027                                                                                                        | 3.05027                                                                                                          | 4.3524  | 32.6123 | 26.2253    | 1         |

| Gene ID   | p-value (Dx) | MeanRatio (DIPG vs. Astrocytoma and Ependymoma and Glioneural Tumor and JPA and Medulloblastoma and Meningioma) | FoldChange (DIPG vs. Astrocytoma and Ependymoma and Glioneural Tumor and JPA and Medulloblastoma and Meningioma) | F(Dx)   | SS(Dx)  | SS (Error) | F (Error) |
|-----------|--------------|-----------------------------------------------------------------------------------------------------------------|------------------------------------------------------------------------------------------------------------------|---------|---------|------------|-----------|
| DLG2      | 0.005268     | 0.42166                                                                                                         | -2.37158                                                                                                         | 4.34812 | 146.13  | 117.627    | 1         |
| BTBD11    | 0.0053132    | 0.0254183                                                                                                       | -39.3418                                                                                                         | 4.34079 | 71.3717 | 57.5473    | 1         |
| LOC730278 | 0.0053257    | -0.337586                                                                                                       | -2.96221                                                                                                         | 4.33878 | 88.6347 | 71.4997    | 1         |
| ARHGEF7   | 0.0053289    | -0.181151                                                                                                       | -5.52024                                                                                                         | 4.33826 | 100.342 | 80.9534    | 1         |
| C14orf173 | 0.0053536    | -0.0947301                                                                                                      | -10.5563                                                                                                         | 4.33429 | 150.723 | 121.711    | 1         |
| VASN      | 0.0053824    | 3.05288                                                                                                         | 3.05288                                                                                                          | 4.32968 | 70.4156 | 56.9221    | 1         |
| HIPK2     | 0.0053936    | 0.146769                                                                                                        | -6.81342                                                                                                         | 4.32791 | 115.18  | 93.1465    | 1         |
| CHSY3     | 0.0054119    | 4.01034                                                                                                         | 4.01034                                                                                                          | 4.325   | 40.3518 | 32.6546    | 1         |
| SLC7A5    | 0.0054135    | -2.09277                                                                                                        | 2.09277                                                                                                          | 4.32476 | 87.9702 | 71.1938    | 1         |
| IGSF9B    | 0.0054315    | 2.49464                                                                                                         | 2.49464                                                                                                          | 4.3219  | 135.602 | 109.815    | 1         |
| STMN2     | 0.0054719    | 0.445499                                                                                                        | -2.24468                                                                                                         | 4.31556 | 1303.42 | 1057.1     | 1         |
| WDR16     | 0.0055856    | -0.165682                                                                                                       | -6.03565                                                                                                         | 4.29797 | 58.2362 | 47.4239    | 1         |
| BEND4     | 0.0056239    | -0.294618                                                                                                       | -3.39422                                                                                                         | 4.29212 | 24.0007 | 19.5713    | 1         |
| MOXD1     | 0.0057132    | 3.14951                                                                                                         | 3.14951                                                                                                          | 4.27869 | 109.655 | 89.699     | 1         |
| RTN4      | 0.0057154    | -0.0760924                                                                                                      | -13.1419                                                                                                         | 4.27836 | 29.4387 | 24.0829    | 1         |
| PALM      | 0.0057166    | 0.265649                                                                                                        | -3.76437                                                                                                         | 4.27817 | 86.094  | 70.4341    | 1         |
| GPR37     | 0.0057201    | 0.436973                                                                                                        | -2.28847                                                                                                         | 4.27765 | 208.484 | 170.583    | 1         |
| PLP1      | 0.0057327    | 0.430976                                                                                                        | -2.32031                                                                                                         | 4.27578 | 3998.85 | 3273.32    | 1         |
| PRKACB    | 0.0057388    | -0.423579                                                                                                       | -2.36083                                                                                                         | 4.27487 | 85.5647 | 70.0552    | 1         |
| DDX43     | 0.0057393    | 0.0671626                                                                                                       | -14.8892                                                                                                         | 4.2748  | 30.332  | 24.8343    | 1         |
| SORCS1    | 0.0057443    | -0.18907                                                                                                        | -5.28904                                                                                                         | 4.27405 | 108.796 | 89.0922    | 1         |
| ADORA3    | 0.0057517    | 2.09689                                                                                                         | 2.09689                                                                                                          | 4.27295 | 70.7579 | 57.9583    | 1         |
| EFCAB1    | 0.0057619    | 0.019207                                                                                                        | -52.0643                                                                                                         | 4.27144 | 240.34  | 196.934    | 1         |
| SYNC1     | 0.0057808    | -0.338863                                                                                                       | -2.95104                                                                                                         | 4.26865 | 55.8988 | 45.8331    | 1         |
| WIP1      | 0.005857     | -0.0826285                                                                                                      | -12.1024                                                                                                         | 4.25749 | 80.8548 | 66.4692    | 1         |
| CUGBP2    | 0.005905     | -2.56193                                                                                                        | 2.56193                                                                                                          | 4.25055 | 53.2136 | 43.8173    | 1         |
| ACHE      | 0.0059237    | -0.193851                                                                                                       | -5.15861                                                                                                         | 4.24786 | 40.9817 | 33.7667    | 1         |



| Gene ID   | p-value (Dx) | MeanRatio (DIPG vs. Astrocytoma and Ependymoma and Glioneural Tumor and JPA and Medulloblastoma and Meningioma) | FoldChange (DIPG vs. Astrocytoma and Ependymoma and Glioneural Tumor and JPA and Medulloblastoma and Meningioma) | F(Dx)   | SS(Dx)  | SS (Error) | F (Error) |
|-----------|--------------|-----------------------------------------------------------------------------------------------------------------|------------------------------------------------------------------------------------------------------------------|---------|---------|------------|-----------|
| SLC4A5    | 0.0059598    | -0.496774                                                                                                       | -2.01299                                                                                                         | 4.24269 | 75.5893 | 62.3573    | 1         |
| LOC493869 | 0.0060359    | -0.265085                                                                                                       | -3.77238                                                                                                         | 4.23192 | 95.0049 | 78.5737    | 1         |
| MGST1     | 0.0061188    | 0.389817                                                                                                        | -2.56531                                                                                                         | 4.22033 | 74.5444 | 61.821     | 1         |
| S100A10   | 0.0061238    | 0.0555526                                                                                                       | -18.0009                                                                                                         | 4.21964 | 164.077 | 136.094    | 1         |
| PYCR1     | 0.0061784    | -4.46874                                                                                                        | 4.46874                                                                                                          | 4.21212 | 33.5258 | 27.8578    | 1         |
| ZDHHC11   | 0.0062789    | -0.0375701                                                                                                      | -26.6169                                                                                                         | 4.19845 | 106.368 | 88.673     | 1         |
| ZMYND12   | 0.0062819    | -0.343394                                                                                                       | -2.91211                                                                                                         | 4.19803 | 35.4099 | 29.5221    | 1         |
| LAMA2     | 0.0063144    | -0.0119247                                                                                                      | -83.8596                                                                                                         | 4.19367 | 80.5698 | 67.2428    | 1         |
| FBXO2     | 0.0063146    | -0.327449                                                                                                       | -3.05391                                                                                                         | 4.19364 | 59.9134 | 50.0035    | 1         |
| MS4A7     | 0.0063605    | -0.113898                                                                                                       | -8.77976                                                                                                         | 4.18751 | 116.101 | 97.0392    | 1         |
| KIF5C     | 0.0063961    | -0.0699052                                                                                                      | -14.3051                                                                                                         | 4.1828  | 1532.65 | 1282.46    | 1         |
| RFFL      | 0.006509     | -3.406                                                                                                          | 3.406                                                                                                            | 4.16802 | 37.8809 | 31.8096    | 1         |
| ACOT7     | 0.0066413    | 0.00673738                                                                                                      | -148.426                                                                                                         | 4.15104 | 119.55  | 100.8      | 1         |
| AKAP12    | 0.0066641    | -0.404733                                                                                                       | -2.47076                                                                                                         | 4.14815 | 39.4639 | 33.2976    | 1         |
| RBMS1     | 0.0067657    | 0.452886                                                                                                        | -2.20806                                                                                                         | 4.13542 | 86.5166 | 73.2231    | 1         |
| VWA1      | 0.0067805    | 0.413014                                                                                                        | -2.42123                                                                                                         | 4.13358 | 44.3138 | 37.5215    | 1         |
| S100A16   | 0.0067897    | -0.329565                                                                                                       | -3.0343                                                                                                          | 4.13244 | 100.851 | 85.4164    | 1         |
| S100A13   | 0.0067937    | -3.83634                                                                                                        | 3.83634                                                                                                          | 4.13194 | 36.6408 | 31.0369    | 1         |
| ERBB2     | 0.0068096    | -0.184973                                                                                                       | -5.40619                                                                                                         | 4.12998 | 65.4743 | 55.487     | 1         |
| KCNS3     | 0.0068413    | 0.177607                                                                                                        | -5.63042                                                                                                         | 4.12607 | 22.8072 | 19.3465    | 1         |
| RGS11     | 0.006876     | -0.218431                                                                                                       | -4.5781                                                                                                          | 4.12182 | 65.3037 | 55.452     | 1         |
| HLA-DOA   | 0.0069292    | 0.143873                                                                                                        | -6.95056                                                                                                         | 4.11534 | 79.4141 | 67.5398    | 1         |
| MBNL2     | 0.0069536    | -13.402                                                                                                         | 13.402                                                                                                           | 4.1124  | 45.1499 | 38.4264    | 1         |
| DPP10     | 0.0069679    | 5.67664                                                                                                         | 5.67664                                                                                                          | 4.11067 | 34.1792 | 29.1016    | 1         |
| PCDHGA5   | 0.0069744    | -0.0637905                                                                                                      | -15.6763                                                                                                         | 4.10988 | 50.1099 | 42.6739    | 1         |
| SLC6A15   | 0.0070628    | 0.0308528                                                                                                       | -32.412                                                                                                          | 4.09933 | 52.2981 | 44.6521    | 1         |
| CHST3     | 0.007063     | 12.254                                                                                                          | 12.254                                                                                                           | 4.09929 | 78.7531 | 67.2399    | 1         |

| Gene ID      | p-value (Dx) | MeanRatio (DIPG vs. Astrocytoma and Ependymoma and Glioneural Tumor and JPA and Medulloblastoma and Meningioma) | FoldChange (DIPG vs. Astrocytoma and Ependymoma and Glioneural Tumor and JPA and Medulloblastoma and Meningioma) | F(Dx)   | SS(Dx)  | SS (Error) | F (Error) |
|--------------|--------------|-----------------------------------------------------------------------------------------------------------------|------------------------------------------------------------------------------------------------------------------|---------|---------|------------|-----------|
| TCEAL7       | 0.0071181    | -6.55217                                                                                                        | 6.55217                                                                                                          | 4.09278 | 50.6898 | 43.3482    | 1         |
| OLAH         | 0.0071937    | 0.139988                                                                                                        | -7.14346                                                                                                         | 4.08394 | 33.4641 | 28.6793    | 1         |
| C1QA         | 0.007199     | 0.112212                                                                                                        | -8.91172                                                                                                         | 4.08331 | 56.8775 | 48.7524    | 1         |
| PTPRT        | 0.0072208    | -0.0811087                                                                                                      | -12.3291                                                                                                         | 4.08079 | 48.2857 | 41.4135    | 1         |
| VIP          | 0.0073278    | 0.341551                                                                                                        | -2.92782                                                                                                         | 4.06848 | 23.9788 | 20.6283    | 1         |
| TMEFF2       | 0.0073447    | 0.350273                                                                                                        | -2.85492                                                                                                         | 4.06655 | 289.825 | 249.447    | 1         |
| SLC6A10P     | 0.0073561    | 0.16107                                                                                                         | -6.20848                                                                                                         | 4.06526 | 44.2152 | 38.0673    | 1         |
| LOC645321    | 0.0074111    | -2.51235                                                                                                        | 2.51235                                                                                                          | 4.05903 | 127.088 | 109.585    | 1         |
| ANKRD24      | 0.0075838    | 0.187829                                                                                                        | -5.324                                                                                                           | 4.0398  | 24.6889 | 21.3899    | 1         |
| HLA-DRB1     | 0.0076028    | -2.65246                                                                                                        | 2.65246                                                                                                          | 4.03772 | 84.5253 | 73.2687    | 1         |
| COL12A1      | 0.0076908    | -0.0400296                                                                                                      | -24.9815                                                                                                         | 4.02813 | 39.5925 | 34.4015    | 1         |
| NIPAL4       | 0.0077313    | 0.0279779                                                                                                       | -35.7425                                                                                                         | 4.02376 | 17.8124 | 15.4938    | 1         |
| 3-Sep        | 0.0077629    | 0.264304                                                                                                        | -3.78352                                                                                                         | 4.02036 | 223.7   | 194.746    | 1         |
| CEP120       | 0.0077931    | -0.211322                                                                                                       | -4.73211                                                                                                         | 4.01714 | 51.1657 | 44.579     | 1         |
| ADCYAP1      | 0.0078331    | 3.16626                                                                                                         | 3.16626                                                                                                          | 4.01288 | 78.2105 | 68.2145    | 1         |
| TGFBR3       | 0.007933     | 0.166222                                                                                                        | -6.01604                                                                                                         | 4.00235 | 91.7582 | 80.2414    | 1         |
| KCNAB1       | 0.0079397    | 0.0167554                                                                                                       | -59.6822                                                                                                         | 4.00164 | 76.8993 | 67.2593    | 1         |
| FGF13        | 0.008032     | -0.209708                                                                                                       | -4.76853                                                                                                         | 3.99204 | 22.6062 | 19.8199    | 1         |
| LOC100133678 | 0.0081259    | 0.0797233                                                                                                       | -12.5434                                                                                                         | 3.9824  | 443.533 | 389.806    | 1         |
| UGT3A2       | 0.0081783    | 0.341924                                                                                                        | -2.92463                                                                                                         | 3.97707 | 32.8303 | 28.8921    | 1         |
| BAG3         | 0.0082328    | -0.101088                                                                                                       | -9.89235                                                                                                         | 3.97157 | 221.761 | 195.43     | 1         |
| COL8A1       | 0.0082495    | -2.74087                                                                                                        | 2.74087                                                                                                          | 3.96989 | 46.7992 | 41.2599    | 1         |
| TEKT1        | 0.0082498    | 0.286975                                                                                                        | -3.48462                                                                                                         | 3.96986 | 64.3282 | 56.7145    | 1         |
| LOC653888    | 0.0082832    | -0.261587                                                                                                       | -3.82282                                                                                                         | 3.96652 | 46.2188 | 40.7828    | 1         |
| EXT1         | 0.0083105    | 0.429275                                                                                                        | -2.32951                                                                                                         | 3.96379 | 84.6734 | 74.7661    | 1         |
| TNFRSF21     | 0.0083456    | -13.2533                                                                                                        | 13.2533                                                                                                          | 3.9603  | 182.749 | 161.508    | 1         |
| MYBPC1       | 0.0083924    | 8.98006                                                                                                         | 8.98006                                                                                                          | 3.95567 | 99.8559 | 88.353     | 1         |

| Gene ID   | p-value (Dx) | MeanRatio (DIPG vs. Astrocytoma and Ependymoma and Glioneural Tumor and JPA and Medulloblastoma and Meningioma) | FoldChange (DIPG vs. Astrocytoma and Ependymoma and Glioneural Tumor and JPA and Medulloblastoma and Meningioma) | F(Dx)   | SS(Dx)  | SS (Error) | F (Error) |
|-----------|--------------|-----------------------------------------------------------------------------------------------------------------|------------------------------------------------------------------------------------------------------------------|---------|---------|------------|-----------|
| PYCARD    | 0.0084657    | -0.278963                                                                                                       | -3.5847                                                                                                          | 3.94848 | 64.4072 | 57.0915    | 1         |
| RGS18     | 0.0084758    | -0.28838                                                                                                        | -3.46765                                                                                                         | 3.94751 | 41.2038 | 36.5327    | 1         |
| EPHB1     | 0.0084761    | 3.19104                                                                                                         | 3.19104                                                                                                          | 3.94748 | 101.102 | 89.6412    | 1         |
| CX3CR1    | 0.0085447    | -2.39302                                                                                                        | 2.39302                                                                                                          | 3.94081 | 190.159 | 168.888    | 1         |
| NCAM2     | 0.0086364    | 0.327278                                                                                                        | -3.05551                                                                                                         | 3.932   | 135.617 | 120.717    | 1         |
| SPAG6     | 0.0086812    | -0.460167                                                                                                       | -2.17313                                                                                                         | 3.92774 | 224.092 | 199.688    | 1         |
| UGT8      | 0.0087345    | -4.34592                                                                                                        | 4.34592                                                                                                          | 3.92269 | 50.5752 | 45.1255    | 1         |
| CTXN1     | 0.0087496    | 0.289851                                                                                                        | -3.45004                                                                                                         | 3.92126 | 108.404 | 96.7586    | 1         |
| MFSD4     | 0.0089519    | -0.176423                                                                                                       | -5.66819                                                                                                         | 3.90243 | 23.4749 | 21.0541    | 1         |
| S100A13   | 0.0090009    | 0.347293                                                                                                        | -2.87942                                                                                                         | 3.89795 | 30.6985 | 27.5644    | 1         |
| SRPK2     | 0.0090351    | -3.61114                                                                                                        | 3.61114                                                                                                          | 3.89483 | 43.7515 | 39.3163    | 1         |
| FCGR2A    | 0.0090477    | 0.276558                                                                                                        | -3.61588                                                                                                         | 3.89368 | 95.7252 | 86.0467    | 1         |
| SEZ6L2    | 0.0090655    | 0.0947355                                                                                                       | -10.5557                                                                                                         | 3.89207 | 40.1772 | 36.13      | 1         |
| LOC153328 | 0.0090837    | -0.214345                                                                                                       | -4.66538                                                                                                         | 3.89041 | 16.794  | 15.1087    | 1         |
| PKNOX2    | 0.0091152    | 626.367                                                                                                         | 626.367                                                                                                          | 3.88757 | 61.9211 | 55.7479    | 1         |
| S100A13   | 0.0091847    | -4.04183                                                                                                        | 4.04183                                                                                                          | 3.88133 | 103.964 | 93.7495    | 1         |
| GAB2      | 0.0091939    | -0.079043                                                                                                       | -12.6513                                                                                                         | 3.88051 | 58.3756 | 52.6515    | 1         |
| GSN       | 0.0092025    | -0.290753                                                                                                       | -3.43934                                                                                                         | 3.87974 | 31.1044 | 28.06      | 1         |
| TPD52L1   | 0.0093037    | 0.293758                                                                                                        | -3.40417                                                                                                         | 3.87077 | 24.3734 | 22.0387    | 1         |
| CTHRC1    | 0.0094144    | 0.413636                                                                                                        | -2.41758                                                                                                         | 3.86107 | 195.412 | 177.138    | 1         |
| PCLO      | 0.0094232    | 0.313549                                                                                                        | -3.18929                                                                                                         | 3.8603  | 42.2165 | 38.2763    | 1         |
| AFAP1L2   | 0.0094434    | 4.26315                                                                                                         | 4.26315                                                                                                          | 3.85855 | 156.363 | 141.833    | 1         |
| CHN1      | 0.0095179    | -0.0267519                                                                                                      | -37.3805                                                                                                         | 3.85211 | 279.406 | 253.866    | 1         |
| LBH       | 0.0095197    | 12.3947                                                                                                         | 12.3947                                                                                                          | 3.85195 | 30.2508 | 27.4868    | 1         |
| RPS6KA2   | 0.0095215    | -0.239291                                                                                                       | -4.17902                                                                                                         | 3.8518  | 75.7224 | 68.8064    | 1         |
| TF        | 0.0095315    | 0.348971                                                                                                        | -2.86556                                                                                                         | 3.85094 | 797.391 | 724.723    | 1         |
| FCER1G    | 0.0095786    | 0.119947                                                                                                        | -8.33703                                                                                                         | 3.84691 | 100.472 | 91.4114    | 1         |

| Gene ID  | p-value (Dx) | MeanRatio (DIPG vs. Astrocytoma and Ependymoma and Glioneural Tumor and JPA and Medulloblastoma and Meningioma) | FoldChange (DIPG vs. Astrocytoma and Ependymoma and Glioneural Tumor and JPA and Medulloblastoma and Meningioma) | F(Dx)   | SS(Dx)  | SS (Error) | F (Error) |
|----------|--------------|-----------------------------------------------------------------------------------------------------------------|------------------------------------------------------------------------------------------------------------------|---------|---------|------------|-----------|
| MAOB     | 0.009622     | 0.254393                                                                                                        | -3.93093                                                                                                         | 3.84321 | 59.8075 | 54.4666    | 1         |
| HLA-DMA  | 0.0096498    | 0.0975471                                                                                                       | -10.2515                                                                                                         | 3.84085 | 128.779 | 117.351    | 1         |
| MUTYH    | 0.0097778    | -18.2096                                                                                                        | 18.2096                                                                                                          | 3.83008 | 36.8601 | 33.6835    | 1         |
| NR2E3    | 0.0098116    | 0.216897                                                                                                        | -4.61048                                                                                                         | 3.82725 | 32.2803 | 29.5201    | 1         |
| EPB41L4B | 0.0098841    | -0.129216                                                                                                       | -7.73896                                                                                                         | 3.82124 | 40.2628 | 36.878     | 1         |
| ACCN1    | 0.0099005    | 0.0205693                                                                                                       | -48.6162                                                                                                         | 3.81989 | 41.1505 | 37.7044    | 1         |
| PHLDB2   | 0.0099066    | -0.0797152                                                                                                      | -12.5447                                                                                                         | 3.81938 | 30.3868 | 27.8459    | 1         |
| STAB1    | 0.00997      | 0.22096                                                                                                         | -4.5257                                                                                                          | 3.81418 | 51.3101 | 47.0836    | 1         |
| FSTL3    | 0.0099853    | 0.450211                                                                                                        | -2.22118                                                                                                         | 3.81293 | 44.568  | 40.9102    | 1         |
| VAMP5    | 0.009986     | -2.00996                                                                                                        | 2.00996                                                                                                          | 3.81287 | 88.614  | 81.3428    | 1         |
| C1orf192 | 0.0100731    | 0.327994                                                                                                        | -3.04883                                                                                                         | 3.80579 | 42.3653 | 38.9614    | 1         |
| CYBA     | 0.0100742    | -0.424343                                                                                                       | -2.35658                                                                                                         | 3.8057  | 84.1067 | 77.3507    | 1         |
| MS4A7    | 0.0100951    | 0.00221049                                                                                                      | -452.389                                                                                                         | 3.80401 | 128.251 | 118.001    | 1         |
| GARNL4   | 0.0101607    | -18.4357                                                                                                        | 18.4357                                                                                                          | 3.79873 | 49.05   | 45.1928    | 1         |
| RSHL3    | 0.0102556    | 0.146063                                                                                                        | -6.84637                                                                                                         | 3.79115 | 121.583 | 112.245    | 1         |
| S100A13  | 0.0102574    | 3.2924                                                                                                          | 3.2924                                                                                                           | 3.79102 | 61.0176 | 56.3336    | 1         |
| KIAA1026 | 0.010275     | -0.380635                                                                                                       | -2.62719                                                                                                         | 3.78962 | 35.2227 | 32.5308    | 1         |
| SLC26A8  | 0.0103046    | -0.283321                                                                                                       | -3.52957                                                                                                         | 3.78728 | 20.7345 | 19.1617    | 1         |
| OXTR     | 0.0103792    | 0.373843                                                                                                        | -2.67492                                                                                                         | 3.78141 | 104.746 | 96.9511    | 1         |
| GBP4     | 0.0104343    | -0.285195                                                                                                       | -3.50637                                                                                                         | 3.77711 | 85.5674 | 79.2898    | 1         |
| NKD2     | 0.0104368    | -21.4791                                                                                                        | 21.4791                                                                                                          | 3.77691 | 30.3227 | 28.0996    | 1         |
| DNER     | 0.0104766    | -0.47975                                                                                                        | -2.08442                                                                                                         | 3.77382 | 251.077 | 232.859    | 1         |
| AFTPH    | 0.0105982    | -0.416256                                                                                                       | -2.40237                                                                                                         | 3.76444 | 60.2325 | 56.0013    | 1         |
| HBG2     | 0.0105984    | -0.144814                                                                                                       | -6.90541                                                                                                         | 3.76442 | 492.357 | 457.773    | 1         |
| INF2     | 0.0107236    | -0.0861473                                                                                                      | -11.608                                                                                                          | 3.75489 | 42.0601 | 39.205     | 1         |
| TPM1     | 0.0107663    | 0.309071                                                                                                        | -3.2355                                                                                                          | 3.75167 | 110.182 | 102.791    | 1         |
| NSF      | 0.0108089    | 4.206                                                                                                           | 4.206                                                                                                            | 3.74846 | 57.413  | 53.6075    | 1         |

| Gene ID   | p-value (Dx) | MeanRatio (DIPG vs. Astrocytoma and Ependymoma and Glioneural Tumor and JPA and Medulloblastoma and Meningioma) | FoldChange (DIPG vs. Astrocytoma and Ependymoma and Glioneural Tumor and JPA and Medulloblastoma and Meningioma) | F(Dx)   | SS(Dx)  | SS (Error) | F (Error) |
|-----------|--------------|-----------------------------------------------------------------------------------------------------------------|------------------------------------------------------------------------------------------------------------------|---------|---------|------------|-----------|
| LOC728276 | 0.0108428    | 0.140397                                                                                                        | -7.12267                                                                                                         | 3.74593 | 39.193  | 36.6199    | 1         |
| SLIT1     | 0.0108847    | -2.13185                                                                                                        | 2.13185                                                                                                          | 3.7428  | 21.5888 | 20.1883    | 1         |
| PIGP      | 0.0108983    | -2.57059                                                                                                        | 2.57059                                                                                                          | 3.74179 | 63.1529 | 59.072     | 1         |
| IDS       | 0.0109553    | 0.0363188                                                                                                       | -27.5339                                                                                                         | 3.73756 | 48.2606 | 45.1932    | 1         |
| REPS2     | 0.0109595    | 0.0289245                                                                                                       | -34.5727                                                                                                         | 3.73725 | 46.6397 | 43.6789    | 1         |
| GPR114    | 0.0111322    | -0.4475                                                                                                         | -2.23463                                                                                                         | 3.7246  | 32.1834 | 30.2427    | 1         |
| CA10      | 0.0112527    | -0.353332                                                                                                       | -2.8302                                                                                                          | 3.71589 | 234.897 | 221.25     | 1         |
| ALAD      | 0.011257     | -0.143533                                                                                                       | -6.96706                                                                                                         | 3.71559 | 60.6824 | 57.1615    | 1         |
| BCAS1     | 0.0112841    | 0.350865                                                                                                        | -2.8501                                                                                                          | 3.71364 | 2688.11 | 2533.47    | 1         |
| TOX2      | 0.0113723    | -5.94889                                                                                                        | 5.94889                                                                                                          | 3.70735 | 33.8562 | 31.9626    | 1         |
| MAP3K8    | 0.0113896    | -0.256427                                                                                                       | -3.89975                                                                                                         | 3.70612 | 47.5278 | 44.8845    | 1         |
| ABR       | 0.0114333    | -0.268705                                                                                                       | -3.72155                                                                                                         | 3.70303 | 116.301 | 109.924    | 1         |
| CLDN10    | 0.0115123    | 2.33857                                                                                                         | 2.33857                                                                                                          | 3.69747 | 32.8615 | 31.1064    | 1         |
| MFAP4     | 0.0115374    | 0.0242261                                                                                                       | -41.2778                                                                                                         | 3.69572 | 104.218 | 98.6992    | 1         |
| ANO6      | 0.0115755    | -0.0128336                                                                                                      | -77.9206                                                                                                         | 3.69305 | 91.6238 | 86.8342    | 1         |
| ADORA3    | 0.0116649    | -0.341622                                                                                                       | -2.92721                                                                                                         | 3.68686 | 165.915 | 157.506    | 1         |
| ADAP2     | 0.0116811    | -0.0638776                                                                                                      | -15.655                                                                                                          | 3.68573 | 73.842  | 70.121     | 1         |
| ALCAM     | 0.0116966    | 0.334995                                                                                                        | -2.98512                                                                                                         | 3.68466 | 211.153 | 200.571    | 1         |
| C1orf106  | 0.0117395    | 2.38694                                                                                                         | 2.38694                                                                                                          | 3.68171 | 74.1801 | 70.5188    | 1         |
| FAM181B   | 0.0118026    | -2.22902                                                                                                        | 2.22902                                                                                                          | 3.6774  | 135.882 | 129.327    | 1         |
| FCER1A    | 0.0120207    | 0.157972                                                                                                        | -6.33022                                                                                                         | 3.66266 | 38.0915 | 36.3998    | 1         |
| LOC390705 | 0.0120236    | -28.4912                                                                                                        | 28.4912                                                                                                          | 3.66247 | 31.0425 | 29.6654    | 1         |
| CACNB2    | 0.0121016    | 2.84301                                                                                                         | 2.84301                                                                                                          | 3.65727 | 30.0444 | 28.7524    | 1         |
| SLITRK1   | 0.0121532    | 0.0232166                                                                                                       | -43.0726                                                                                                         | 3.65385 | 70.4639 | 67.497     | 1         |
| SYNGR1    | 0.012225     | -3.18071                                                                                                        | 3.18071                                                                                                          | 3.64912 | 58.5796 | 56.1858    | 1         |
| PCP4      | 0.012348     | 0.0515481                                                                                                       | -19.3994                                                                                                         | 3.64108 | 116.068 | 111.571    | 1         |
| MS4A6A    | 0.0124227    | -0.0294729                                                                                                      | -33.9295                                                                                                         | 3.63624 | 131.305 | 126.385    | 1         |

| Gene ID      | p-value (Dx) | MeanRatio (DIPG vs. Astrocytoma and Ependymoma and Glioneural Tumor and JPA and Medulloblastoma and Meningioma) | FoldChange (DIPG vs. Astrocytoma and Ependymoma and Glioneural Tumor and JPA and Medulloblastoma and Meningioma) | F(Dx)   | SS(Dx)  | SS (Error) | F (Error) |
|--------------|--------------|-----------------------------------------------------------------------------------------------------------------|------------------------------------------------------------------------------------------------------------------|---------|---------|------------|-----------|
| GPRASP2      | 0.0125085    | -46.3642                                                                                                        | 46.3642                                                                                                          | 3.63072 | 34.3575 | 33.1204    | 1         |
| FAM74A4      | 0.0125812    | 0.0939894                                                                                                       | -10.6395                                                                                                         | 3.62607 | 39.0821 | 37.7233    | 1         |
| GPM6B        | 0.0125965    | 0.10211                                                                                                         | -9.79339                                                                                                         | 3.6251  | 214.011 | 206.626    | 1         |
| CABP7        | 0.0126931    | 4.87181                                                                                                         | 4.87181                                                                                                          | 3.61898 | 66.701  | 64.508     | 1         |
| MGP          | 0.0128063    | -2.45374                                                                                                        | 2.45374                                                                                                          | 3.61187 | 246.897 | 239.249    | 1         |
| CTBP2        | 0.0128123    | -5.36466                                                                                                        | 5.36466                                                                                                          | 3.6115  | 21.1481 | 20.4952    | 1         |
| SLC6A20      | 0.0128324    | 0.128912                                                                                                        | -7.75722                                                                                                         | 3.61025 | 28.1236 | 27.2648    | 1         |
| CUBN         | 0.0128504    | 0.282765                                                                                                        | -3.53651                                                                                                         | 3.60913 | 41.1654 | 39.9207    | 1         |
| ALAD         | 0.0130411    | 6.66176                                                                                                         | 6.66176                                                                                                          | 3.59735 | 23.9476 | 23.2996    | 1         |
| FN1          | 0.0130841    | 0.340694                                                                                                        | -2.93518                                                                                                         | 3.59472 | 32.4202 | 31.566     | 1         |
| RALGDS       | 0.0130887    | 0.240573                                                                                                        | -4.15674                                                                                                         | 3.59443 | 74.0563 | 72.1106    | 1         |
| MGLL         | 0.0131679    | 4.73273                                                                                                         | 4.73273                                                                                                          | 3.58961 | 53.8906 | 52.5453    | 1         |
| HLA-DRB6     | 0.013206     | 0.0880075                                                                                                       | -11.3627                                                                                                         | 3.58731 | 84.4107 | 82.3563    | 1         |
| FLNB         | 0.0132365    | -0.0532864                                                                                                      | -18.7665                                                                                                         | 3.58547 | 107.007 | 104.456    | 1         |
| GNG12        | 0.0132886    | 0.0624283                                                                                                       | -16.0184                                                                                                         | 3.58233 | 135.827 | 132.706    | 1         |
| CHL1         | 0.0133656    | 0.204029                                                                                                        | -4.90125                                                                                                         | 3.57772 | 193.655 | 189.448    | 1         |
| PLEK         | 0.013383     | -0.455565                                                                                                       | -2.19508                                                                                                         | 3.57668 | 42.8016 | 41.884     | 1         |
| ABCB9        | 0.0134506    | -0.170945                                                                                                       | -5.84982                                                                                                         | 3.57266 | 71.3666 | 69.9151    | 1         |
| LMO3         | 0.0135121    | 0.0740051                                                                                                       | -13.5126                                                                                                         | 3.56902 | 255.961 | 251.011    | 1         |
| FAM5C        | 0.0136805    | 2.10003                                                                                                         | 2.10003                                                                                                          | 3.55916 | 118.828 | 116.853    | 1         |
| C10orf79     | 0.0137232    | -0.146943                                                                                                       | -6.80538                                                                                                         | 3.55668 | 38.1007 | 37.4935    | 1         |
| CORO1A       | 0.0137822    | 193.887                                                                                                         | 193.887                                                                                                          | 3.55326 | 34.6311 | 34.112     | 1         |
| EMP3         | 0.0137968    | 0.169007                                                                                                        | -5.91691                                                                                                         | 3.55242 | 119.996 | 118.225    | 1         |
| RAB33A       | 0.0139031    | -0.214504                                                                                                       | -4.66191                                                                                                         | 3.54631 | 86.2377 | 85.1116    | 1         |
| PLCB1        | 0.014011     | -0.0718187                                                                                                      | -13.9239                                                                                                         | 3.54016 | 64.4862 | 63.7546    | 1         |
| SLCO3A1      | 0.0140753    | -0.0975926                                                                                                      | -10.2467                                                                                                         | 3.53653 | 15.845  | 15.6814    | 1         |
| LOC100132060 | 0.014091     | -0.021268                                                                                                       | -47.0189                                                                                                         | 3.53564 | 71.1863 | 70.4687    | 1         |

| Gene ID   | p-value (Dx) | MeanRatio (DIPG vs. Astrocytoma and Ependymoma and Glioneural Tumor and JPA and Medulloblastoma and Meningioma) | FoldChange (DIPG vs. Astrocytoma and Ependymoma and Glioneural Tumor and JPA and Medulloblastoma and Meningioma) | F(Dx)   | SS(Dx)  | SS (Error) | F (Error) |
|-----------|--------------|-----------------------------------------------------------------------------------------------------------------|------------------------------------------------------------------------------------------------------------------|---------|---------|------------|-----------|
| CPEB2     | 0.0141037    | 3.81179                                                                                                         | 3.81179                                                                                                          | 3.53492 | 22.9672 | 22.7403    | 1         |
| MT1H      | 0.0141748    | -0.178858                                                                                                       | -5.59102                                                                                                         | 3.53093 | 28.6527 | 28.4017    | 1         |
| QPRT      | 0.0141754    | 0.413546                                                                                                        | -2.41811                                                                                                         | 3.5309  | 52.1539 | 51.6975    | 1         |
| SNCB      | 0.0142387    | 0.200374                                                                                                        | -4.99067                                                                                                         | 3.52736 | 82.8159 | 82.1736    | 1         |
| AGAP3     | 0.0142985    | 0.258181                                                                                                        | -3.87325                                                                                                         | 3.52404 | 45.1014 | 44.7937    | 1         |
| DIXDC1    | 0.0143053    | 3.43933                                                                                                         | 3.43933                                                                                                          | 3.52366 | 23.7608 | 23.6013    | 1         |
| NAP1L2    | 0.0143656    | -0.134236                                                                                                       | -7.44955                                                                                                         | 3.52032 | 26.9752 | 26.8195    | 1         |
| LOC402116 | 0.0143799    | -0.0980106                                                                                                      | -10.203                                                                                                          | 3.51953 | 15.1593 | 15.0752    | 1         |
| HMGCLL1   | 0.0144236    | 2.10304                                                                                                         | 2.10304                                                                                                          | 3.51712 | 18.1996 | 18.111     | 1         |
| LOC650239 | 0.0144595    | -0.188339                                                                                                       | -5.30957                                                                                                         | 3.51515 | 27.8284 | 27.7084    | 1         |
| INS-IGF2  | 0.0144976    | -0.0395326                                                                                                      | -25.2956                                                                                                         | 3.51307 | 35.1423 | 35.0116    | 1         |
| TRIM6     | 0.014503     | -0.00122336                                                                                                     | -817.421                                                                                                         | 3.51277 | 36.4539 | 36.3214    | 1         |
| C12orf34  | 0.0145862    | 0.000344061                                                                                                     | -2906.46                                                                                                         | 3.50823 | 39.8753 | 39.7817    | 1         |
| BAMBI     | 0.0146104    | 3.17223                                                                                                         | 3.17223                                                                                                          | 3.50692 | 146.156 | 145.868    | 1         |
| FRMPD2    | 0.0146683    | -2.84856                                                                                                        | 2.84856                                                                                                          | 3.50379 | 24.0332 | 24.0072    | 1         |
| NRIP3     | 0.0147139    | 0.164197                                                                                                        | -6.09024                                                                                                         | 3.50133 | 68.6187 | 68.5927    | 1         |
| DAZ4      | 0.0149345    | -0.171807                                                                                                       | -5.82047                                                                                                         | 3.48955 | 22.3052 | 22.372     | 1         |
| RBMS1     | 0.0150377    | 0.46942                                                                                                         | -2.13029                                                                                                         | 3.4841  | 89.4207 | 89.8287    | 1         |
| CNTNAP4   | 0.0151083    | 3.97322                                                                                                         | 3.97322                                                                                                          | 3.4804  | 60.1312 | 60.4699    | 1         |
| DKK2      | 0.015121     | -0.0773674                                                                                                      | -12.9253                                                                                                         | 3.47973 | 25.7618 | 25.9118    | 1         |
| LMTK3     | 0.0151774    | 0.0632187                                                                                                       | -15.8181                                                                                                         | 3.47679 | 119.595 | 120.393    | 1         |
| TNFSF13B  | 0.0152985    | 0.470649                                                                                                        | -2.12473                                                                                                         | 3.47052 | 90.479  | 91.2477    | 1         |
| FPR1      | 0.0153726    | -0.305169                                                                                                       | -3.27687                                                                                                         | 3.4667  | 55.4545 | 55.9872    | 1         |
| KCTD12    | 0.0155719    | -2.43303                                                                                                        | 2.43303                                                                                                          | 3.45653 | 104.488 | 105.802    | 1         |
| STXBP6    | 0.0156605    | 0.353178                                                                                                        | -2.83143                                                                                                         | 3.45206 | 77.5318 | 78.6084    | 1         |
| TNC       | 0.0157034    | -4.07476                                                                                                        | 4.07476                                                                                                          | 3.44991 | 111.584 | 113.204    | 1         |
| WSCD1     | 0.0157708    | -3.38312                                                                                                        | 3.38312                                                                                                          | 3.44653 | 122.22  | 124.116    | 1         |

| Gene ID   | p-value (Dx) | MeanRatio (DIPG vs. Astrocytoma and Ependymoma and Glioneural Tumor and JPA and Medulloblastoma and Meningioma) | FoldChange (DIPG vs. Astrocytoma and Ependymoma and Glioneural Tumor and JPA and Medulloblastoma and Meningioma) | F(Dx)   | SS(Dx)  | SS (Error) | F (Error) |
|-----------|--------------|-----------------------------------------------------------------------------------------------------------------|------------------------------------------------------------------------------------------------------------------|---------|---------|------------|-----------|
| RNY4      | 0.0157765    | 0.427354                                                                                                        | -2.33998                                                                                                         | 3.44625 | 42.5974 | 43.2619    | 1         |
| FLJ90757  | 0.0157858    | 2.62934                                                                                                         | 2.62934                                                                                                          | 3.44578 | 20.4387 | 20.7603    | 1         |
| MAP1B     | 0.0159501    | 6.25455                                                                                                         | 6.25455                                                                                                          | 3.43763 | 178.3   | 181.535    | 1         |
| KLC1      | 0.0159844    | 0.429093                                                                                                        | -2.3305                                                                                                          | 3.43594 | 170.344 | 173.52     | 1         |
| MYBPC1    | 0.016145     | 0.396324                                                                                                        | -2.52319                                                                                                         | 3.42807 | 39.0973 | 39.9176    | 1         |
| LOC339535 | 0.0161711    | -0.100418                                                                                                       | -9.95836                                                                                                         | 3.4268  | 27.6678 | 28.2588    | 1         |
| TNK2      | 0.016405     | -0.22723                                                                                                        | -4.40083                                                                                                         | 3.41551 | 84.4956 | 86.5856    | 1         |
| CLMN      | 0.0164569    | 0.0305164                                                                                                       | -32.7692                                                                                                         | 3.41303 | 16.2188 | 16.6321    | 1         |
| PRKCB     | 0.0165199    | 2.38153                                                                                                         | 2.38153                                                                                                          | 3.41003 | 63.5663 | 65.2434    | 1         |
| GALNT10   | 0.0165591    | -0.176548                                                                                                       | -5.66418                                                                                                         | 3.40817 | 75.9484 | 77.9948    | 1         |
| FAM115A   | 0.0166444    | -0.474865                                                                                                       | -2.10586                                                                                                         | 3.40414 | 25.7874 | 26.5136    | 1         |
| C20orf100 | 0.0166449    | -6.09334                                                                                                        | 6.09334                                                                                                          | 3.40411 | 83.5879 | 85.9424    | 1         |
| MRAS      | 0.0166844    | 2.60058                                                                                                         | 2.60058                                                                                                          | 3.40225 | 35.4356 | 36.4536    | 1         |
| SLC2A12   | 0.0169819    | 7.35844                                                                                                         | 7.35844                                                                                                          | 3.38839 | 28.5556 | 29.4962    | 1         |
| GPR17     | 0.01715      | 2.1034                                                                                                          | 2.1034                                                                                                           | 3.38068 | 122.762 | 127.095    | 1         |
| SERINC2   | 0.0171946    | 5.26759                                                                                                         | 5.26759                                                                                                          | 3.37864 | 19.4618 | 20.1608    | 1         |
| PDGFA     | 0.0172348    | -7.32265                                                                                                        | 7.32265                                                                                                          | 3.37682 | 32.0434 | 33.2124    | 1         |
| TYROBP    | 0.0172642    | -0.0228184                                                                                                      | -43.8243                                                                                                         | 3.37548 | 101.899 | 105.658    | 1         |
| ATP1B1    | 0.0173266    | 0.363708                                                                                                        | -2.74946                                                                                                         | 3.37266 | 398.23  | 413.266    | 1         |
| COBLL1    | 0.0174824    | 0.183343                                                                                                        | -5.45425                                                                                                         | 3.36566 | 159.135 | 165.487    | 1         |
| FAM108B1  | 0.0175474    | -13.1223                                                                                                        | 13.1223                                                                                                          | 3.36276 | 30.9142 | 32.1759    | 1         |
| FEZ1      | 0.0177183    | 0.380495                                                                                                        | -2.62815                                                                                                         | 3.35518 | 132.607 | 138.331    | 1         |
| A2BP1     | 0.0177803    | 2.70455                                                                                                         | 2.70455                                                                                                          | 3.35245 | 13.4051 | 13.9951    | 1         |
| LOC649366 | 0.0177933    | 3.18008                                                                                                         | 3.18008                                                                                                          | 3.35188 | 261.443 | 272.996    | 1         |
| GPR83     | 0.0179203    | 7.00373                                                                                                         | 7.00373                                                                                                          | 3.34633 | 24.7066 | 25.8412    | 1         |
| TPPP3     | 0.0180802    | 0.339359                                                                                                        | -2.94673                                                                                                         | 3.3394  | 40.1543 | 42.0855    | 1         |
| NTNG1     | 0.018131     | 4.15554                                                                                                         | 4.15554                                                                                                          | 3.33721 | 86.7438 | 90.9752    | 1         |



| Gene ID   | p-value (Dx) | MeanRatio (DIPG vs. Astrocytoma and Ependymoma and Glioneural Tumor and JPA and Medulloblastoma and Meningioma) | FoldChange (DIPG vs. Astrocytoma and Ependymoma and Glioneural Tumor and JPA and Medulloblastoma and Meningioma) | F(Dx)   | SS(Dx)  | SS (Error) | F (Error) |
|-----------|--------------|-----------------------------------------------------------------------------------------------------------------|------------------------------------------------------------------------------------------------------------------|---------|---------|------------|-----------|
| PRKCB1    | 0.0182023    | 0.37766                                                                                                         | -2.64788                                                                                                         | 3.33415 | 219.508 | 230.427    | 1         |
| LOC645969 | 0.0182155    | 0.00140804                                                                                                      | -710.206                                                                                                         | 3.33358 | 55.4149 | 58.1813    | 1         |
| RNU1F1    | 0.0183369    | -3.09815                                                                                                        | 3.09815                                                                                                          | 3.3284  | 56.7885 | 59.7163    | 1         |
| SPAG6     | 0.0183475    | -0.181676                                                                                                       | -5.5043                                                                                                          | 3.32795 | 97.609  | 102.655    | 1         |
| SLITRK3   | 0.0184472    | -2.76491                                                                                                        | 2.76491                                                                                                          | 3.32373 | 114.726 | 120.81     | 1         |
| IL1RAP    | 0.0185448    | -0.136468                                                                                                       | -7.3277                                                                                                          | 3.31963 | 98.2948 | 103.636    | 1         |
| NRXN2     | 0.0186399    | -0.0565205                                                                                                      | -17.6927                                                                                                         | 3.31564 | 73.4625 | 77.5472    | 1         |
| EBI2      | 0.0186906    | 0.41664                                                                                                         | -2.40015                                                                                                         | 3.31353 | 62.7247 | 66.2546    | 1         |
| EBF1      | 0.018727     | -0.229038                                                                                                       | -4.3661                                                                                                          | 3.31202 | 83.1172 | 87.8348    | 1         |
| HSPB1     | 0.0187618    | -0.442034                                                                                                       | -2.26227                                                                                                         | 3.31057 | 106.788 | 112.898    | 1         |
| SORBS1    | 0.0187773    | -3.80682                                                                                                        | 3.80682                                                                                                          | 3.30993 | 21.1473 | 22.3616    | 1         |
| CD302     | 0.0188031    | -0.0971658                                                                                                      | -10.2917                                                                                                         | 3.30886 | 115.371 | 122.035    | 1         |
| PTGIS     | 0.0189734    | 0.386643                                                                                                        | -2.58637                                                                                                         | 3.30185 | 32.3475 | 34.2888    | 1         |
| PGCP      | 0.018986     | -0.345824                                                                                                       | -2.89165                                                                                                         | 3.30133 | 51.1821 | 54.2622    | 1         |
| ZNF326    | 0.0191665    | 5.91448                                                                                                         | 5.91448                                                                                                          | 3.29398 | 30.683  | 32.6021    | 1         |
| PPP2R2C   | 0.0192536    | -33.7827                                                                                                        | 33.7827                                                                                                          | 3.29046 | 176.738 | 187.993    | 1         |
| TFAP2C    | 0.0192805    | -44.2248                                                                                                        | 44.2248                                                                                                          | 3.28937 | 17.286  | 18.3929    | 1         |
| FLJ10916  | 0.0193143    | -5.39903                                                                                                        | 5.39903                                                                                                          | 3.28801 | 54.9454 | 58.4878    | 1         |
| CXCL12    | 0.0193165    | -0.342283                                                                                                       | -2.92156                                                                                                         | 3.28792 | 42.3507 | 45.0823    | 1         |
| FOLR2     | 0.0193497    | 0.0296293                                                                                                       | -33.7504                                                                                                         | 3.28659 | 35.1377 | 37.4193    | 1         |
| SYNGR1    | 0.019362     | 0.0130652                                                                                                       | -76.5391                                                                                                         | 3.2861  | 55.7113 | 59.3377    | 1         |
| C10orf116 | 0.019454     | -0.185975                                                                                                       | -5.37707                                                                                                         | 3.28242 | 159.976 | 170.58     | 1         |
| HEY2      | 0.0195618    | 0.436357                                                                                                        | -2.2917                                                                                                          | 3.27813 | 67.5015 | 72.07      | 1         |
| SLC2A10   | 0.0196228    | 0.0827072                                                                                                       | -12.0908                                                                                                         | 3.27572 | 70.0687 | 74.8661    | 1         |
| TTYH2     | 0.0196875    | 0.0294505                                                                                                       | -33.9553                                                                                                         | 3.27317 | 53.9838 | 57.7249    | 1         |
| FCGR2B    | 0.019689     | 0.393388                                                                                                        | -2.54202                                                                                                         | 3.27311 | 35.8935 | 38.3817    | 1         |
| CD14      | 0.0196917    | -0.369322                                                                                                       | -2.70767                                                                                                         | 3.273   | 139.534 | 149.211    | 1         |

| Gene ID   | p-value (Dx) | MeanRatio (DIPG vs. Astrocytoma and Ependymoma and Glioneural Tumor and JPA and Medulloblastoma and Meningioma) | FoldChange (DIPG vs. Astrocytoma and Ependymoma and Glioneural Tumor and JPA and Medulloblastoma and Meningioma) | F(Dx)   | SS(Dx)  | SS (Error) | F (Error) |
|-----------|--------------|-----------------------------------------------------------------------------------------------------------------|------------------------------------------------------------------------------------------------------------------|---------|---------|------------|-----------|
| CRHBP     | 0.0197265    | -0.209234                                                                                                       | -4.77933                                                                                                         | 3.27163 | 19.5264 | 20.8894    | 1         |
| C11orf88  | 0.0197638    | 0.403067                                                                                                        | -2.48098                                                                                                         | 3.27017 | 87.9014 | 94.0792    | 1         |
| ASTN2     | 0.0198378    | -8.9997                                                                                                         | 8.9997                                                                                                           | 3.26727 | 75.8083 | 81.2081    | 1         |
| PDE4DIP   | 0.0199641    | -0.395162                                                                                                       | -2.53061                                                                                                         | 3.26235 | 23.7908 | 25.5238    | 1         |
| NNAT      | 0.0199884    | -0.436437                                                                                                       | -2.29128                                                                                                         | 3.26141 | 109.636 | 117.656    | 1         |
| TBXAS1    | 0.0200192    | -0.0191237                                                                                                      | -52.2911                                                                                                         | 3.26022 | 58.5104 | 62.8136    | 1         |
| ITPR2     | 0.020049     | 0.129019                                                                                                        | -7.75079                                                                                                         | 3.25907 | 53.945  | 57.933     | 1         |
| PPP4R4    | 0.0200599    | 0.24178                                                                                                         | -4.136                                                                                                           | 3.25865 | 24.1011 | 25.8861    | 1         |
| NEBL      | 0.020062     | -3.92897                                                                                                        | 3.92897                                                                                                          | 3.25857 | 24.5213 | 26.3381    | 1         |
| FN1       | 0.0201083    | 0.164988                                                                                                        | -6.06104                                                                                                         | 3.25678 | 32.7021 | 35.1443    | 1         |
| PODXL     | 0.020124     | 0.0516407                                                                                                       | -19.3646                                                                                                         | 3.25618 | 67.0077 | 72.0252    | 1         |
| RRN3P2    | 0.0201783    | -17.0481                                                                                                        | 17.0481                                                                                                          | 3.25409 | 26.988  | 29.0275    | 1         |
| CSMD2     | 0.0204266    | -3.81293                                                                                                        | 3.81293                                                                                                          | 3.24463 | 102.036 | 110.067    | 1         |
| KLK7      | 0.0204407    | -0.125112                                                                                                       | -7.99282                                                                                                         | 3.2441  | 15.2448 | 16.4474    | 1         |
| SCN3B     | 0.020468     | 2.08946                                                                                                         | 2.08946                                                                                                          | 3.24306 | 19.766  | 21.332     | 1         |
| PTPDC1    | 0.0204932    | -0.109902                                                                                                       | -9.09899                                                                                                         | 3.24212 | 15.7132 | 16.9631    | 1         |
| PSAT1     | 0.0205542    | 0.01621                                                                                                         | -61.6903                                                                                                         | 3.23982 | 79.9582 | 86.3795    | 1         |
| LOC728855 | 0.0206051    | 4.77452                                                                                                         | 4.77452                                                                                                          | 3.23791 | 84.2435 | 91.0626    | 1         |
| PLCL1     | 0.0207052    | 0.381422                                                                                                        | -2.62177                                                                                                         | 3.23416 | 20.0952 | 21.747     | 1         |
| PPP1R1B   | 0.0207737    | -14.234                                                                                                         | 14.234                                                                                                           | 3.23161 | 104.74  | 113.439    | 1         |
| ACSL5     | 0.0208998    | -2.23427                                                                                                        | 2.23427                                                                                                          | 3.22694 | 27.5957 | 29.9308    | 1         |
| CP        | 0.0209276    | 0.0994319                                                                                                       | -10.0571                                                                                                         | 3.22591 | 32.5562 | 35.3223    | 1         |
| MRGPRF    | 0.0209681    | 0.162163                                                                                                        | -6.16665                                                                                                         | 3.22442 | 25.7148 | 27.9126    | 1         |
| HBG1      | 0.0209929    | -0.0680928                                                                                                      | -14.6858                                                                                                         | 3.22351 | 442.231 | 480.162    | 1         |
| FOXD1     | 0.0209937    | 0.0254096                                                                                                       | -39.3552                                                                                                         | 3.22348 | 167.319 | 181.672    | 1         |
| FAM89A    | 0.02107      | 2.35723                                                                                                         | 2.35723                                                                                                          | 3.22068 | 194.496 | 211.364    | 1         |
| LCP1      | 0.0211584    | -0.0887111                                                                                                      | -11.2725                                                                                                         | 3.21745 | 79.1465 | 86.0971    | 1         |

| Gene ID   | p-value (Dx) | MeanRatio (DIPG vs. Astrocytoma and Ependymoma and Glioneural Tumor and JPA and Medulloblastoma and Meningioma) | FoldChange (DIPG vs. Astrocytoma and Ependymoma and Glioneural Tumor and JPA and Medulloblastoma and Meningioma) | F(Dx)   | SS(Dx)  | SS (Error) | F (Error) |
|-----------|--------------|-----------------------------------------------------------------------------------------------------------------|------------------------------------------------------------------------------------------------------------------|---------|---------|------------|-----------|
| EBI3      | 0.021249     | -0.385538                                                                                                       | -2.59378                                                                                                         | 3.21415 | 31.4741 | 34.2732    | 1         |
| PPAP2C    | 0.0214119    | 0.226647                                                                                                        | -4.41215                                                                                                         | 3.20826 | 13.4839 | 14.7101    | 1         |
| HTR4      | 0.0215695    | -0.355753                                                                                                       | -2.81094                                                                                                         | 3.20261 | 17.7637 | 19.4132    | 1         |
| ARHGAP28  | 0.0215833    | 0.406742                                                                                                        | -2.45856                                                                                                         | 3.20212 | 34.7459 | 37.9781    | 1         |
| OTUD7A    | 0.0215952    | 0.0261149                                                                                                       | -38.2923                                                                                                         | 3.2017  | 15.2873 | 16.7116    | 1         |
| LOC643011 | 0.0219218    | -7.08219                                                                                                        | 7.08219                                                                                                          | 3.19014 | 26.4604 | 29.0305    | 1         |
| S100A10   | 0.0219271    | 0.195805                                                                                                        | -5.10711                                                                                                         | 3.18996 | 122.209 | 134.086    | 1         |
| ACTN1     | 0.0220393    | -4.59363                                                                                                        | 4.59363                                                                                                          | 3.18603 | 72.7426 | 79.911     | 1         |
| C10orf61  | 0.0220433    | -0.335759                                                                                                       | -2.97832                                                                                                         | 3.18589 | 62.2377 | 68.3739    | 1         |
| SPA17     | 0.0221005    | 0.368488                                                                                                        | -2.71379                                                                                                         | 3.1839  | 70.0593 | 77.0148    | 1         |
| MATN2     | 0.0221824    | 0.332249                                                                                                        | -3.00979                                                                                                         | 3.18105 | 127.672 | 140.473    | 1         |
| EVI2A     | 0.0222139    | 0.390682                                                                                                        | -2.55963                                                                                                         | 3.17996 | 12.3877 | 13.6345    | 1         |
| SNAP91    | 0.0222293    | 0.276584                                                                                                        | -3.61554                                                                                                         | 3.17943 | 400.46  | 440.837    | 1         |
| CCDC129   | 0.0223235    | 0.220973                                                                                                        | -4.52544                                                                                                         | 3.17618 | 26.6502 | 29.3673    | 1         |
| SCGB2A1   | 0.0224058    | 0.148529                                                                                                        | -6.7327                                                                                                          | 3.17335 | 39.231  | 43.2692    | 1         |
| NBPF10    | 0.0224375    | -4.35254                                                                                                        | 4.35254                                                                                                          | 3.17227 | 60.1565 | 66.3714    | 1         |
| MARVELD2  | 0.0224429    | -2.11469                                                                                                        | 2.11469                                                                                                          | 3.17208 | 19.353  | 21.3536    | 1         |
| LOC286411 | 0.0225135    | -0.488905                                                                                                       | -2.04539                                                                                                         | 3.16967 | 23.3998 | 25.8385    | 1         |
| GAPT      | 0.0225234    | -0.0937637                                                                                                      | -10.6651                                                                                                         | 3.16933 | 38.105  | 42.0806    | 1         |
| HEPH      | 0.0226963    | 6.27889                                                                                                         | 6.27889                                                                                                          | 3.16346 | 22.8323 | 25.2613    | 1         |
| HLA-DRB4  | 0.0227095    | -0.457829                                                                                                       | -2.18422                                                                                                         | 3.16302 | 170.182 | 188.313    | 1         |
| TTC8      | 0.0227825    | -0.231016                                                                                                       | -4.32871                                                                                                         | 3.16055 | 44.3063 | 49.0648    | 1         |
| RUNX2     | 0.022796     | -0.2256                                                                                                         | -4.43262                                                                                                         | 3.1601  | 16.8747 | 18.6897    | 1         |
| CLEC5A    | 0.0228024    | 0.0198623                                                                                                       | -50.3467                                                                                                         | 3.15988 | 26.6967 | 29.5702    | 1         |
| FGF12     | 0.0228835    | 0.102034                                                                                                        | -9.80068                                                                                                         | 3.15716 | 80.538  | 89.2838    | 1         |
| MVP       | 0.0229289    | -3.68961                                                                                                        | 3.68961                                                                                                          | 3.15564 | 35.3553 | 39.2135    | 1         |
| TMEM64    | 0.0229567    | -0.499985                                                                                                       | -2.00006                                                                                                         | 3.15471 | 41.5718 | 46.122     | 1         |

| Gene ID      | p-value (Dx) | MeanRatio (DIPG vs. Astrocytoma and Ependymoma and Glioneural Tumor and JPA and Medulloblastoma and Meningioma) | FoldChange (DIPG vs. Astrocytoma and Ependymoma and Glioneural Tumor and JPA and Medulloblastoma and Meningioma) | F(Dx)   | SS(Dx)  | SS (Error) | F (Error) |
|--------------|--------------|-----------------------------------------------------------------------------------------------------------------|------------------------------------------------------------------------------------------------------------------|---------|---------|------------|-----------|
| SYK          | 0.0230987    | -0.368537                                                                                                       | -2.71343                                                                                                         | 3.14998 | 50.7709 | 56.4124    | 1         |
| CD33         | 0.0231299    | -0.324008                                                                                                       | -3.08634                                                                                                         | 3.14895 | 32.5647 | 36.1951    | 1         |
| CREB3L2      | 0.0231606    | -0.145874                                                                                                       | -6.85524                                                                                                         | 3.14793 | 111.456 | 123.922    | 1         |
| MNDA         | 0.0232397    | -0.398124                                                                                                       | -2.51178                                                                                                         | 3.14532 | 29.9317 | 33.307     | 1         |
| LOC100134424 | 0.0232548    | 52.2772                                                                                                         | 52.2772                                                                                                          | 3.14482 | 30.4781 | 33.9203    | 1         |
| HHIP         | 0.0232988    | 0.156289                                                                                                        | -6.3984                                                                                                          | 3.14337 | 33.338  | 37.1204    | 1         |
| CYLD         | 0.0233115    | -4.93424                                                                                                        | 4.93424                                                                                                          | 3.14295 | 22.6186 | 25.1881    | 1         |
| TSPAN4       | 0.0233548    | 0.160273                                                                                                        | -6.23934                                                                                                         | 3.14153 | 125.264 | 139.557    | 1         |
| MORN5        | 0.0235541    | -0.402938                                                                                                       | -2.48177                                                                                                         | 3.13502 | 31.0703 | 34.6875    | 1         |
| DDX12        | 0.023653     | -11.7042                                                                                                        | 11.7042                                                                                                          | 3.13182 | 42.7881 | 47.8183    | 1         |
| GABRB3       | 0.0239683    | 0.0171697                                                                                                       | -58.2422                                                                                                         | 3.12169 | 118.32  | 132.659    | 1         |
| COX4I2       | 0.0239721    | -0.0883007                                                                                                      | -11.3249                                                                                                         | 3.12156 | 47.9335 | 53.7446    | 1         |
| SPR          | 0.0240044    | 0.00908562                                                                                                      | -110.064                                                                                                         | 3.12054 | 36.0146 | 40.394     | 1         |
| CDKL2        | 0.0240258    | 0.285513                                                                                                        | -3.50246                                                                                                         | 3.11985 | 22.2267 | 24.935     | 1         |
| CFD          | 0.0240267    | 0.10803                                                                                                         | -9.25672                                                                                                         | 3.11982 | 53.8956 | 60.4632    | 1         |
| ITGB2        | 0.0240605    | -0.141246                                                                                                       | -7.07986                                                                                                         | 3.11875 | 111.232 | 124.83     | 1         |
| AKAP11       | 0.0240764    | -5.31899                                                                                                        | 5.31899                                                                                                          | 3.11825 | 37.8252 | 42.4559    | 1         |
| ZIC3         | 0.0240966    | -0.44435                                                                                                        | -2.25048                                                                                                         | 3.1176  | 24.9545 | 28.0154    | 1         |
| TMOD2        | 0.0243949    | -0.05774                                                                                                        | -17.319                                                                                                          | 3.10821 | 79.0844 | 89.0531    | 1         |
| MSR1         | 0.0245326    | 0.000597294                                                                                                     | -1674.22                                                                                                         | 3.10391 | 34.9881 | 39.453     | 1         |
| CAPSL        | 0.0246001    | 0.358616                                                                                                        | -2.7885                                                                                                          | 3.10181 | 222.506 | 251.069    | 1         |
| MGP          | 0.0246485    | -2.03225                                                                                                        | 2.03225                                                                                                          | 3.10031 | 300.668 | 339.43     | 1         |
| PIGK         | 0.0248321    | -6.83838                                                                                                        | 6.83838                                                                                                          | 3.09465 | 50.2393 | 56.8199    | 1         |
| ALDH4A1      | 0.0248744    | -6.08538                                                                                                        | 6.08538                                                                                                          | 3.09335 | 35.5373 | 40.209     | 1         |
| HSPB8        | 0.0249998    | -0.364094                                                                                                       | -2.74654                                                                                                         | 3.08951 | 59.6516 | 67.5772    | 1         |
| NTRK2        | 0.025        | -2.32769                                                                                                        | 2.32769                                                                                                          | 3.08951 | 138.385 | 156.772    | 1         |
| HLA-DRA      | 0.0251446    | -0.194763                                                                                                       | -5.13444                                                                                                         | 3.08511 | 225.337 | 255.64     | 1         |

| Gene ID   | p-value (Dx) | MeanRatio (DIPG vs. Astrocytoma and Ependymoma and Glioneural Tumor and JPA and Medulloblastoma and Meningioma) | FoldChange (DIPG vs. Astrocytoma and Ependymoma and Glioneural Tumor and JPA and Medulloblastoma and Meningioma) | F(Dx)   | SS(Dx)  | SS (Error) | F (Error) |
|-----------|--------------|-----------------------------------------------------------------------------------------------------------------|------------------------------------------------------------------------------------------------------------------|---------|---------|------------|-----------|
| TLR5      | 0.0252698    | -0.262538                                                                                                       | -3.80897                                                                                                         | 3.08133 | 34.0045 | 38.6248    | 1         |
| PAQR5     | 0.0253931    | -0.102898                                                                                                       | -9.71833                                                                                                         | 3.07762 | 22.8196 | 25.9514    | 1         |
| LAMA4     | 0.025506     | 0.360935                                                                                                        | -2.77059                                                                                                         | 3.07424 | 90.2063 | 102.699    | 1         |
| CACNA1C   | 0.0255152    | 0.40099                                                                                                         | -2.49383                                                                                                         | 3.07397 | 20.8273 | 23.7139    | 1         |
| SYNJ1     | 0.0255171    | -0.0833185                                                                                                      | -12.0021                                                                                                         | 3.07391 | 45.4322 | 51.7298    | 1         |
| SEMA4B    | 0.0257722    | -0.186525                                                                                                       | -5.36121                                                                                                         | 3.06634 | 36.8572 | 42.0698    | 1         |
| FCGRT     | 0.0257755    | 0.0860494                                                                                                       | -11.6212                                                                                                         | 3.06624 | 79.9735 | 91.2867    | 1         |
| HAP1      | 0.0258239    | 0.39342                                                                                                         | -2.54182                                                                                                         | 3.06481 | 65.0727 | 74.3126    | 1         |
| KIAA0247  | 0.0259593    | -0.317689                                                                                                       | -3.14773                                                                                                         | 3.06084 | 57.2081 | 65.4162    | 1         |
| STOM      | 0.0260247    | -477.447                                                                                                        | 477.447                                                                                                          | 3.05892 | 66.3079 | 75.869     | 1         |
| FRMPD2    | 0.0261086    | -0.225268                                                                                                       | -4.43916                                                                                                         | 3.05648 | 15.8734 | 18.1768    | 1         |
| C6orf165  | 0.0261519    | 0.126461                                                                                                        | -7.9076                                                                                                          | 3.05522 | 32.7606 | 37.53      | 1         |
| KIAA0773  | 0.0261832    | -0.0665745                                                                                                      | -15.0208                                                                                                         | 3.05431 | 42.7864 | 49.0298    | 1         |
| ALDH1A2   | 0.0261982    | 0.336869                                                                                                        | -2.96851                                                                                                         | 3.05387 | 40.225  | 46.1013    | 1         |
| GPR19     | 0.0264829    | 3.2492                                                                                                          | 3.2492                                                                                                           | 3.04566 | 43.0714 | 49.4966    | 1         |
| ANK1      | 0.0265453    | -0.0840943                                                                                                      | -11.8914                                                                                                         | 3.04387 | 17.3283 | 19.925     | 1         |
| NKX6-2    | 0.0265716    | 0.484394                                                                                                        | -2.06444                                                                                                         | 3.04312 | 242.012 | 278.346    | 1         |
| C7orf16   | 0.0266489    | 2.40601                                                                                                         | 2.40601                                                                                                          | 3.04092 | 85.5701 | 98.4884    | 1         |
| NLGN4Y    | 0.0269102    | 3.99553                                                                                                         | 3.99553                                                                                                          | 3.03351 | 60.8369 | 70.1922    | 1         |
| AKR1C4    | 0.0269138    | 0.175861                                                                                                        | -5.68631                                                                                                         | 3.03341 | 55.7106 | 64.2798    | 1         |
| LOC731954 | 0.0269563    | 0.0827196                                                                                                       | -12.089                                                                                                          | 3.03221 | 34.823  | 40.1952    | 1         |
| TSPAN4    | 0.0269677    | 0.151313                                                                                                        | -6.6088                                                                                                          | 3.03189 | 79.1935 | 91.4204    | 1         |
| RRAGB     | 0.0271678    | 0.0955265                                                                                                       | -10.4683                                                                                                         | 3.02629 | 60.9989 | 70.5472    | 1         |
| LOC255167 | 0.0271898    | 5.56339                                                                                                         | 5.56339                                                                                                          | 3.02567 | 42.3787 | 49.0223    | 1         |
| CRYM      | 0.0272119    | -0.0822265                                                                                                      | -12.1615                                                                                                         | 3.02506 | 18.9409 | 21.9147    | 1         |
| HLF       | 0.0272836    | 2.31185                                                                                                         | 2.31185                                                                                                          | 3.02306 | 23.1162 | 26.7631    | 1         |
| GPR68     | 0.0273065    | 2.3243                                                                                                          | 2.3243                                                                                                           | 3.02243 | 68.3592 | 79.1606    | 1         |

| Gene ID   | p-value (Dx) | MeanRatio (DIPG vs. Astrocytoma and Ependymoma and Glioneural Tumor and JPA and Medulloblastoma and Meningioma) | FoldChange (DIPG vs. Astrocytoma and Ependymoma and Glioneural Tumor and JPA and Medulloblastoma and Meningioma) | F(Dx)   | SS(Dx)  | SS (Error) | F (Error) |
|-----------|--------------|-----------------------------------------------------------------------------------------------------------------|------------------------------------------------------------------------------------------------------------------|---------|---------|------------|-----------|
| TRIM23    | 0.0273382    | -12.262                                                                                                         | 12.262                                                                                                           | 3.02155 | 40.1005 | 46.4503    | 1         |
| RAP1GAP   | 0.0273504    | 0.237592                                                                                                        | -4.2089                                                                                                          | 3.02121 | 172.722 | 200.095    | 1         |
| OR4N2     | 0.0273791    | 2.1695                                                                                                          | 2.1695                                                                                                           | 3.02042 | 169.701 | 196.646    | 1         |
| HNMT      | 0.0275225    | -0.149863                                                                                                       | -6.67276                                                                                                         | 3.01646 | 119.567 | 138.734    | 1         |
| TNR       | 0.0275829    | 2.60971                                                                                                         | 2.60971                                                                                                          | 3.0148  | 28.3904 | 32.9595    | 1         |
| GAS7      | 0.0277157    | 10.3098                                                                                                         | 10.3098                                                                                                          | 3.01116 | 58.5206 | 68.021     | 1         |
| LOC653114 | 0.0277328    | 0.357515                                                                                                        | -2.79708                                                                                                         | 3.01069 | 22.6952 | 26.3836    | 1         |
| GREM1     | 0.0278793    | 11.1057                                                                                                         | 11.1057                                                                                                          | 3.00671 | 19.2598 | 22.4196    | 1         |
| C1orf87   | 0.0279526    | 0.395241                                                                                                        | -2.5301                                                                                                          | 3.00472 | 23.2444 | 27.0759    | 1         |
| BRI3BP    | 0.0280692    | -0.197565                                                                                                       | -5.06161                                                                                                         | 3.00157 | 23.79   | 27.7405    | 1         |
| LOC653764 | 0.0281174    | 4.34567                                                                                                         | 4.34567                                                                                                          | 3.00027 | 33.3087 | 38.8566    | 1         |
| RELN      | 0.028126     | 0.207425                                                                                                        | -4.82101                                                                                                         | 3.00004 | 63.6338 | 74.2384    | 1         |
| CD83      | 0.0281423    | 15.8189                                                                                                         | 15.8189                                                                                                          | 2.9996  | 40.8364 | 47.6488    | 1         |
| SPAG8     | 0.0281899    | -0.0740761                                                                                                      | -13.4996                                                                                                         | 2.99832 | 28.4275 | 33.184     | 1         |
| MYL12A    | 0.0282932    | -0.262581                                                                                                       | -3.80834                                                                                                         | 2.99556 | 55.3059 | 64.6192    | 1         |
| TIMP2     | 0.0283863    | -0.439553                                                                                                       | -2.27504                                                                                                         | 2.99307 | 26.5337 | 31.0276    | 1         |
| CTSH      | 0.0284488    | -0.0410129                                                                                                      | -24.3826                                                                                                         | 2.99141 | 60.4151 | 70.6866    | 1         |
| PTRF      | 0.0284541    | -0.0341441                                                                                                      | -29.2876                                                                                                         | 2.99127 | 68.9192 | 80.6404    | 1         |
| CD37      | 0.0284721    | -0.352906                                                                                                       | -2.83361                                                                                                         | 2.99079 | 26.9956 | 31.5919    | 1         |
| MAP2      | 0.0284899    | -2.59568                                                                                                        | 2.59568                                                                                                          | 2.99032 | 41.978  | 49.1329    | 1         |
| NRP1      | 0.0285294    | -0.479271                                                                                                       | -2.0865                                                                                                          | 2.98927 | 91.0309 | 106.584    | 1         |
| MAP4      | 0.0286901    | -0.161188                                                                                                       | -6.20394                                                                                                         | 2.98503 | 40.6795 | 47.6974    | 1         |
| LOC653127 | 0.0288263    | -0.290474                                                                                                       | -3.44265                                                                                                         | 2.98145 | 21.1685 | 24.8502    | 1         |
| MAN2A1    | 0.0288579    | -0.0425199                                                                                                      | -23.5184                                                                                                         | 2.98063 | 58.3669 | 68.5373    | 1         |
| BCAS4     | 0.0291391    | -0.437588                                                                                                       | -2.28525                                                                                                         | 2.97331 | 23.225  | 27.3391    | 1         |
| NDRG4     | 0.0291705    | -0.0688826                                                                                                      | -14.5174                                                                                                         | 2.97249 | 28.627  | 33.7072    | 1         |
| SLC30A3   | 0.0292665    | 0.225474                                                                                                        | -4.43509                                                                                                         | 2.97001 | 74.8932 | 88.2575    | 1         |

| Gene ID       | p-value (Dx) | MeanRatio (DIPG vs. Astrocytoma and Ependymoma and Glioneural Tumor and JPA and Medulloblastoma and Meningioma) | FoldChange (DIPG vs. Astrocytoma and Ependymoma and Glioneural Tumor and JPA and Medulloblastoma and Meningioma) | F(Dx)   | SS(Dx)  | SS (Error) | F (Error) |
|---------------|--------------|-----------------------------------------------------------------------------------------------------------------|------------------------------------------------------------------------------------------------------------------|---------|---------|------------|-----------|
| TMEM189-UBE2V | 0.0292691    | -12.7012                                                                                                        | 12.7012                                                                                                          | 2.96995 | 27.8014 | 32.7632    | 1         |
| MYBPC1        | 0.0292843    | 0.113833                                                                                                        | -8.78482                                                                                                         | 2.96956 | 96.7011 | 113.975    | 1         |
| MYLK4         | 0.0294756    | -0.312452                                                                                                       | -3.20049                                                                                                         | 2.96464 | 34.6789 | 40.9412    | 1         |
| C4orf49       | 0.0294888    | 0.439625                                                                                                        | -2.27467                                                                                                         | 2.96431 | 52.2753 | 61.7222    | 1         |
| KLRB1         | 0.0294926    | 0.130609                                                                                                        | -7.65642                                                                                                         | 2.96421 | 24.8199 | 29.3061    | 1         |
| CDCP1         | 0.0297891    | 5.44574                                                                                                         | 5.44574                                                                                                          | 2.95667 | 25.2715 | 29.9155    | 1         |
| SLC6A9        | 0.0303112    | 0.0238781                                                                                                       | -41.8794                                                                                                         | 2.94359 | 32.488  | 38.6291    | 1         |
| RNASE4        | 0.0303832    | 0.346379                                                                                                        | -2.88701                                                                                                         | 2.9418  | 50.003  | 59.4909    | 1         |
| PLEC1         | 0.0303894    | 0.110704                                                                                                        | -9.0331                                                                                                          | 2.94165 | 33.7452 | 40.1503    | 1         |
| PTPRE         | 0.030391     | -11.8308                                                                                                        | 11.8308                                                                                                          | 2.94161 | 139.732 | 166.257    | 1         |
| TRIM9         | 0.0305693    | -0.0361037                                                                                                      | -27.698                                                                                                          | 2.9372  | 58.7873 | 70.0515    | 1         |
| ST8SIA3       | 0.0308803    | 0.135761                                                                                                        | -7.36589                                                                                                         | 2.92959 | 76.1483 | 90.9748    | 1         |
| CBS           | 0.0310088    | -4.46295                                                                                                        | 4.46295                                                                                                          | 2.92647 | 67.9146 | 81.2244    | 1         |
| PTPRE         | 0.0310359    | -6.40892                                                                                                        | 6.40892                                                                                                          | 2.92582 | 95.5439 | 114.294    | 1         |
| PRUNE2        | 0.0310931    | 0.35898                                                                                                         | -2.78567                                                                                                         | 2.92443 | 26.8227 | 32.1017    | 1         |
| ROPN1L        | 0.0310969    | -2.75923                                                                                                        | 2.75923                                                                                                          | 2.92434 | 69.3958 | 83.0565    | 1         |
| RAB3C         | 0.0311226    | 10.4559                                                                                                         | 10.4559                                                                                                          | 2.92372 | 45.4395 | 54.3959    | 1         |
| CYP26B1       | 0.0311429    | 0.402938                                                                                                        | -2.48177                                                                                                         | 2.92323 | 116.483 | 139.466    | 1         |
| SLC6A1        | 0.0311459    | 0.415732                                                                                                        | -2.4054                                                                                                          | 2.92316 | 131.783 | 157.788    | 1         |
| CACNB2        | 0.0313427    | 0.0870981                                                                                                       | -11.4813                                                                                                         | 2.91843 | 21.8112 | 26.1576    | 1         |
| TMEM132B      | 0.0314084    | -0.29648                                                                                                        | -3.37291                                                                                                         | 2.91685 | 149.35  | 179.209    | 1         |
| PTP4A3        | 0.0314151    | 0.247634                                                                                                        | -4.03821                                                                                                         | 2.91669 | 58.652  | 70.3817    | 1         |
| ELMO1         | 0.031427     | 0.183584                                                                                                        | -5.4471                                                                                                          | 2.91641 | 193.367 | 232.061    | 1         |
| CD86          | 0.03149      | 0.11066                                                                                                         | -9.03673                                                                                                         | 2.9149  | 54.5251 | 65.4696    | 1         |
| FAM181A       | 0.0314993    | 2.79179                                                                                                         | 2.79179                                                                                                          | 2.91469 | 39.1591 | 47.0228    | 1         |
| HOXC4         | 0.0316288    | -2.75011                                                                                                        | 2.75011                                                                                                          | 2.9116  | 70.0416 | 84.1961    | 1         |
| LOC100130633  | 0.0316332    | 0.0241015                                                                                                       | -41.4911                                                                                                         | 2.9115  | 43.0226 | 51.7187    | 1         |

| Gene ID   | p-value (Dx) | MeanRatio (DIPG vs. Astrocytoma and Ependymoma and Glioneural Tumor and JPA and Medulloblastoma and Meningioma) | FoldChange (DIPG vs. Astrocytoma and Ependymoma and Glioneural Tumor and JPA and Medulloblastoma and Meningioma) | F(Dx)   | SS(Dx)  | SS (Error) | F (Error) |
|-----------|--------------|-----------------------------------------------------------------------------------------------------------------|------------------------------------------------------------------------------------------------------------------|---------|---------|------------|-----------|
| TKTL1     | 0.0316712    | -4.0018                                                                                                         | 4.0018                                                                                                           | 2.9106  | 55.5925 | 66.8501    | 1         |
| 3-Sep     | 0.031776     | 0.0940161                                                                                                       | -10.6365                                                                                                         | 2.90812 | 184.123 | 221.597    | 1         |
| KLHL4     | 0.0318153    | 2.41603                                                                                                         | 2.41603                                                                                                          | 2.90719 | 29.7219 | 35.7825    | 1         |
| LOC389816 | 0.0319098    | -6.21409                                                                                                        | 6.21409                                                                                                          | 2.90497 | 33.0427 | 39.8109    | 1         |
| LAMB1     | 0.0319644    | 0.0157369                                                                                                       | -63.5449                                                                                                         | 2.90369 | 75.8447 | 91.4205    | 1         |
| ID1       | 0.0319877    | 0.345732                                                                                                        | -2.89241                                                                                                         | 2.90314 | 34.1835 | 41.2113    | 1         |
| CPNE8     | 0.0319879    | 2.73294                                                                                                         | 2.73294                                                                                                          | 2.90313 | 45.5396 | 54.9023    | 1         |
| DNAJB1    | 0.0325591    | -0.0677769                                                                                                      | -14.7543                                                                                                         | 2.88987 | 488.523 | 591.664    | 1         |
| NR4A2     | 0.0325907    | 2.7594                                                                                                          | 2.7594                                                                                                           | 2.88914 | 66.1443 | 80.1294    | 1         |
| ITGB2     | 0.0326541    | -0.161726                                                                                                       | -6.18331                                                                                                         | 2.88769 | 114.357 | 138.605    | 1         |
| CASP4     | 0.0326585    | 0.153229                                                                                                        | -6.52618                                                                                                         | 2.88758 | 42.7858 | 51.86      | 1         |
| MR1       | 0.0327029    | 0.135184                                                                                                        | -7.39732                                                                                                         | 2.88656 | 28.5222 | 34.5835    | 1         |
| SRPX      | 0.0327739    | -2.55648                                                                                                        | 2.55648                                                                                                          | 2.88494 | 213.223 | 258.682    | 1         |
| FOLR1     | 0.0328477    | -0.300707                                                                                                       | -3.32549                                                                                                         | 2.88326 | 22.8229 | 27.7048    | 1         |
| LOC646588 | 0.032962     | -0.090826                                                                                                       | -11.0101                                                                                                         | 2.88066 | 106.209 | 129.045    | 1         |
| C9orf171  | 0.0330153    | 0.181094                                                                                                        | -5.52198                                                                                                         | 2.87945 | 27.0814 | 32.9177    | 1         |
| ABCC3     | 0.0330461    | -10.6747                                                                                                        | 10.6747                                                                                                          | 2.87875 | 48.8784 | 59.4267    | 1         |
| IER3      | 0.0331136    | 0.00771148                                                                                                      | -129.677                                                                                                         | 2.87722 | 79.9475 | 97.2522    | 1         |
| GALNT9    | 0.033257     | 97.7018                                                                                                         | 97.7018                                                                                                          | 2.87399 | 83.9338 | 102.216    | 1         |
| AIF1      | 0.0332798    | -0.489201                                                                                                       | -2.04415                                                                                                         | 2.87348 | 110.251 | 134.29     | 1         |
| CD83      | 0.0334189    | 0.47603                                                                                                         | -2.10071                                                                                                         | 2.87036 | 33.3186 | 40.6274    | 1         |
| CTSC      | 0.0334255    | 0.348555                                                                                                        | -2.86899                                                                                                         | 2.87021 | 52.5175 | 64.0411    | 1         |
| SORBS2    | 0.0334355    | -10.5709                                                                                                        | 10.5709                                                                                                          | 2.86998 | 35.3859 | 43.1538    | 1         |
| ZIC2      | 0.0334417    | 1620.3                                                                                                          | 1620.3                                                                                                           | 2.86985 | 177.254 | 216.175    | 1         |
| ALDH1A3   | 0.0335459    | -20.1628                                                                                                        | 20.1628                                                                                                          | 2.86752 | 249.32  | 304.312    | 1         |
| NHS       | 0.0337182    | -9.89945                                                                                                        | 9.89945                                                                                                          | 2.86369 | 25.5064 | 31.1739    | 1         |
| PAK7      | 0.0337682    | -0.0550029                                                                                                      | -18.1809                                                                                                         | 2.86258 | 41.6902 | 50.9735    | 1         |



| Gene ID      | p-value (Dx) | MeanRatio (DIPG vs. Astrocytoma and Ependymoma and Glioneural Tumor and JPA and Medulloblastoma and Meningioma) | FoldChange (DIPG vs. Astrocytoma and Ependymoma and Glioneural Tumor and JPA and Medulloblastoma and Meningioma) | F(Dx)   | SS(Dx)  | SS (Error) | F (Error) |
|--------------|--------------|-----------------------------------------------------------------------------------------------------------------|------------------------------------------------------------------------------------------------------------------|---------|---------|------------|-----------|
| DMD          | 0.0339728    | -0.0706557                                                                                                      | -14.1531                                                                                                         | 2.85807 | 21.791  | 26.6853    | 1         |
| PQLC3        | 0.0340837    | -0.315432                                                                                                       | -3.17025                                                                                                         | 2.85563 | 56.4615 | 69.2019    | 1         |
| GABBR1       | 0.0341607    | -0.178747                                                                                                       | -5.59449                                                                                                         | 2.85395 | 70.9244 | 86.9797    | 1         |
| CD86         | 0.0341822    | -0.157707                                                                                                       | -6.34089                                                                                                         | 2.85348 | 46.2893 | 56.7772    | 1         |
| GRIA3        | 0.0342525    | -0.012047                                                                                                       | -83.0081                                                                                                         | 2.85194 | 57.094  | 70.0676    | 1         |
| LRRC58       | 0.0345194    | -5.55658                                                                                                        | 5.55658                                                                                                          | 2.84615 | 26.9469 | 33.1375    | 1         |
| HIST1H2BD    | 0.0345601    | -4.67611                                                                                                        | 4.67611                                                                                                          | 2.84527 | 106.159 | 130.587    | 1         |
| ARHGAP24     | 0.0346102    | -7.42452                                                                                                        | 7.42452                                                                                                          | 2.84419 | 19.888  | 24.4738    | 1         |
| LOC113230    | 0.0346266    | -0.193454                                                                                                       | -5.1692                                                                                                          | 2.84383 | 25.7058 | 31.6369    | 1         |
| BMP4         | 0.0346657    | 0.214783                                                                                                        | -4.65587                                                                                                         | 2.84299 | 23.0893 | 28.4251    | 1         |
| C1orf162     | 0.034818     | 0.18624                                                                                                         | -5.36941                                                                                                         | 2.83972 | 108.357 | 133.551    | 1         |
| DIRAS3       | 0.0348519    | -2.00037                                                                                                        | 2.00037                                                                                                          | 2.839   | 37.4724 | 46.1971    | 1         |
| PLOD2        | 0.0350525    | -0.471613                                                                                                       | -2.12038                                                                                                         | 2.83472 | 89.1791 | 110.109    | 1         |
| PSD3         | 0.0350704    | -10.9126                                                                                                        | 10.9126                                                                                                          | 2.83434 | 35.5014 | 43.8391    | 1         |
| LOC653123    | 0.0351334    | 0.259661                                                                                                        | -3.85118                                                                                                         | 2.833   | 70.0259 | 86.5128    | 1         |
| ARHGAP15     | 0.0351459    | 0.302983                                                                                                        | -3.30051                                                                                                         | 2.83273 | 55.0579 | 68.0271    | 1         |
| SLC22A4      | 0.0351478    | 0.238451                                                                                                        | -4.19373                                                                                                         | 2.83269 | 35.7825 | 44.2119    | 1         |
| MGAT3        | 0.0353194    | 0.478996                                                                                                        | -2.0877                                                                                                          | 2.82906 | 69.1411 | 85.5386    | 1         |
| SORBS1       | 0.0353451    | 4.27274                                                                                                         | 4.27274                                                                                                          | 2.82852 | 33.4841 | 41.4332    | 1         |
| CYP2U1       | 0.0353744    | 0.188875                                                                                                        | -5.2945                                                                                                          | 2.8279  | 73.9665 | 91.5459    | 1         |
| ATCAY        | 0.0353763    | 7.48056                                                                                                         | 7.48056                                                                                                          | 2.82786 | 73.7795 | 91.3157    | 1         |
| ARHGEF10L    | 0.0355624    | -5.53571                                                                                                        | 5.53571                                                                                                          | 2.82395 | 31.257  | 38.7398    | 1         |
| FAM125B      | 0.0356454    | 0.0712362                                                                                                       | -14.0378                                                                                                         | 2.82222 | 50.308  | 62.3899    | 1         |
| FCGR2A       | 0.0357798    | 0.173635                                                                                                        | -5.75922                                                                                                         | 2.81941 | 39.6981 | 49.281     | 1         |
| PALMD        | 0.0358705    | -0.0461968                                                                                                      | -21.6465                                                                                                         | 2.81753 | 38.3972 | 47.6979    | 1         |
| DUSP1        | 0.0359906    | -0.0418412                                                                                                      | -23.8999                                                                                                         | 2.81504 | 161.413 | 200.689    | 1         |
| LOC100008589 | 0.0362084    | -0.367643                                                                                                       | -2.72003                                                                                                         | 2.81055 | 321.293 | 400.109    | 1         |

| <b>Gene ID</b> | <b>p-value (Dx)</b> | <b>MeanRatio (DIPG vs. Astrocytoma and Ependymoma and Glioneural Tumor and JPA and Medulloblastoma and Meningioma)</b> | <b>FoldChange (DIPG vs. Astrocytoma and Ependymoma and Glioneural Tumor and JPA and Medulloblastoma and Meningioma)</b> | <b>F(Dx)</b> | <b>SS(Dx)</b> | <b>SS (Error)</b> | <b>F (Error)</b> |
|----------------|---------------------|------------------------------------------------------------------------------------------------------------------------|-------------------------------------------------------------------------------------------------------------------------|--------------|---------------|-------------------|------------------|
| C4B            | 0.0362716           | 0.131181                                                                                                               | -7.62306                                                                                                                | 2.80925      | 23.5865       | 29.3861           | 1                |
| PAPLN          | 0.0363799           | -4.08154                                                                                                               | 4.08154                                                                                                                 | 2.80703      | 42.2379       | 52.6651           | 1                |
| OAF            | 0.0364417           | 30.9137                                                                                                                | 30.9137                                                                                                                 | 2.80577      | 57.1393       | 71.2773           | 1                |
| GFRA1          | 0.0365344           | -0.0616073                                                                                                             | -16.2318                                                                                                                | 2.80388      | 24.4487       | 30.5185           | 1                |
| C10orf32       | 0.0365747           | -0.418251                                                                                                              | -2.39091                                                                                                                | 2.80306      | 60.8757       | 76.0116           | 1                |
| SH3PXD2A       | 0.036584            | 2.8005                                                                                                                 | 2.8005                                                                                                                  | 2.80287      | 64.1228       | 80.0714           | 1                |
| PLAC8          | 0.0366216           | 0.0666734                                                                                                              | -14.9985                                                                                                                | 2.80211      | 35.1097       | 43.8541           | 1                |
| FUCA1          | 0.0366877           | 0.01302                                                                                                                | -76.8048                                                                                                                | 2.80077      | 62.7001       | 78.3536           | 1                |
| CNIH2          | 0.0367029           | 0.0360112                                                                                                              | -27.7692                                                                                                                | 2.80046      | 42.3602       | 52.9415           | 1                |
| GBP1           | 0.0367068           | -0.193613                                                                                                              | -5.16494                                                                                                                | 2.80038      | 107.74        | 134.656           | 1                |
| HEATR5A        | 0.0367778           | -0.436458                                                                                                              | -2.29117                                                                                                                | 2.79894      | 42.8039       | 53.5251           | 1                |
| IL6ST          | 0.0367869           | -7.57303                                                                                                               | 7.57303                                                                                                                 | 2.79876      | 30.7339       | 38.4344           | 1                |
| CCDC85A        | 0.0369263           | -0.0259936                                                                                                             | -38.4709                                                                                                                | 2.79595      | 46.1932       | 57.8252           | 1                |
| KLC2           | 0.0369524           | -0.233146                                                                                                              | -4.28917                                                                                                                | 2.79542      | 16.014        | 20.0502           | 1                |
| FBXW7          | 0.0370825           | -0.109825                                                                                                              | -9.10537                                                                                                                | 2.79281      | 69.0329       | 86.5133           | 1                |
| 4-Sep          | 0.0372844           | 3.9282                                                                                                                 | 3.9282                                                                                                                  | 2.78878      | 166.877       | 209.436           | 1                |
| GRN            | 0.0374425           | -0.0798826                                                                                                             | -12.5184                                                                                                                | 2.78563      | 45.3676       | 57.0019           | 1                |
| TPM2           | 0.0374805           | -0.132061                                                                                                              | -7.57223                                                                                                                | 2.78488      | 128.468       | 161.456           | 1                |
| ANKRD20A3      | 0.0380683           | -5.58225                                                                                                               | 5.58225                                                                                                                 | 2.77333      | 18.7815       | 23.7026           | 1                |
| DNAJB2         | 0.0382321           | 0.0238492                                                                                                              | -41.9301                                                                                                                | 2.77015      | 102.016       | 128.895           | 1                |
| EDN3           | 0.0383152           | -0.274037                                                                                                              | -3.64914                                                                                                                | 2.76854      | 27.2197       | 34.4113           | 1                |
| ZFP36          | 0.0384228           | 0.154431                                                                                                               | -6.47537                                                                                                                | 2.76646      | 163.356       | 206.671           | 1                |
| ABCC8          | 0.0385671           | 0.185587                                                                                                               | -5.38832                                                                                                                | 2.76368      | 46.8062       | 59.2767           | 1                |
| SLC45A4        | 0.0385761           | -0.0432809                                                                                                             | -23.1049                                                                                                                | 2.76351      | 27.1422       | 34.3758           | 1                |
| ARHGAP24       | 0.0385779           | -2.07615                                                                                                               | 2.07615                                                                                                                 | 2.76347      | 35.9856       | 45.5766           | 1                |
| PLCE1          | 0.0386234           | 0.335257                                                                                                               | -2.98279                                                                                                                | 2.7626       | 51.3323       | 65.0341           | 1                |
| DNAJC12        | 0.0387603           | -0.44878                                                                                                               | -2.22826                                                                                                                | 2.75998      | 80.7307       | 102.377           | 1                |

| Gene ID   | p-value (Dx) | MeanRatio (DIPG vs. Astrocytoma and Ependymoma and Glioneural Tumor and JPA and Medulloblastoma and Meningioma) | FoldChange (DIPG vs. Astrocytoma and Ependymoma and Glioneural Tumor and JPA and Medulloblastoma and Meningioma) | F(Dx)   | SS(Dx)  | SS (Error) | F (Error) |
|-----------|--------------|-----------------------------------------------------------------------------------------------------------------|------------------------------------------------------------------------------------------------------------------|---------|---------|------------|-----------|
| C3AR1     | 0.038847     | -0.228142                                                                                                       | -4.38323                                                                                                         | 2.75832 | 30.5433 | 38.756     | 1         |
| SNAP23    | 0.0389365    | -0.308807                                                                                                       | -3.23827                                                                                                         | 2.75661 | 45.5439 | 57.8259    | 1         |
| DARC      | 0.0389584    | -0.0277347                                                                                                      | -36.056                                                                                                          | 2.7562  | 80.0594 | 101.665    | 1         |
| LOC646817 | 0.0390053    | -0.292005                                                                                                       | -3.42459                                                                                                         | 2.75531 | 32.5124 | 41.2997    | 1         |
| IRX2      | 0.0390157    | 8.35882                                                                                                         | 8.35882                                                                                                          | 2.75511 | 242.141 | 307.608    | 1         |
| GADD45A   | 0.0390684    | 5.25363                                                                                                         | 5.25363                                                                                                          | 2.75411 | 122.605 | 155.81     | 1         |
| DRAM1     | 0.0392029    | 0.287769                                                                                                        | -3.47501                                                                                                         | 2.75157 | 42.4162 | 53.9536    | 1         |
| NME5      | 0.0392585    | -3.30852                                                                                                        | 3.30852                                                                                                          | 2.75052 | 46.2062 | 58.7968    | 1         |
| SGK3      | 0.039276     | -0.0637255                                                                                                      | -15.6923                                                                                                         | 2.75019 | 51.538  | 65.5894    | 1         |
| TSPAN18   | 0.0394758    | 14.0899                                                                                                         | 14.0899                                                                                                          | 2.74643 | 38.0509 | 48.4913    | 1         |
| ATP5I     | 0.0395214    | -0.250755                                                                                                       | -3.98795                                                                                                         | 2.74558 | 56.4043 | 71.903     | 1         |
| KCNJ16    | 0.0395832    | 0.212736                                                                                                        | -4.70067                                                                                                         | 2.74442 | 112.473 | 143.438    | 1         |
| PLD5      | 0.0397291    | 0.123194                                                                                                        | -8.11725                                                                                                         | 2.7417  | 38.376  | 48.9902    | 1         |
| DOCK10    | 0.0399324    | -0.201095                                                                                                       | -4.97278                                                                                                         | 2.73792 | 155.294 | 198.519    | 1         |
| RNF175    | 0.0399504    | -0.182775                                                                                                       | -5.47122                                                                                                         | 2.73759 | 46.0235 | 58.8409    | 1         |
| PPP2R2C   | 0.0400625    | 4.17539                                                                                                         | 4.17539                                                                                                          | 2.73551 | 72.2283 | 92.4137    | 1         |
| MLC1      | 0.0401557    | -2.74668                                                                                                        | 2.74668                                                                                                          | 2.7338  | 24.6294 | 31.5323    | 1         |
| KCNAB1    | 0.0401645    | -112.608                                                                                                        | 112.608                                                                                                          | 2.73363 | 37.6756 | 48.2379    | 1         |
| C5AR1     | 0.0402554    | 0.318544                                                                                                        | -3.13929                                                                                                         | 2.73196 | 29.0814 | 37.2571    | 1         |
| CADPS2    | 0.0402776    | 2.22828                                                                                                         | 2.22828                                                                                                          | 2.73155 | 12.8268 | 16.4352    | 1         |
| TOB1      | 0.0403432    | -73.0284                                                                                                        | 73.0284                                                                                                          | 2.73035 | 43.4918 | 55.7515    | 1         |
| APOL3     | 0.0403762    | -0.1177                                                                                                         | -8.49615                                                                                                         | 2.72975 | 36.2926 | 46.5333    | 1         |
| C10orf47  | 0.0404831    | 0.403808                                                                                                        | -2.47642                                                                                                         | 2.72779 | 22.598  | 28.9952    | 1         |
| LAYN      | 0.0405122    | 12.743                                                                                                          | 12.743                                                                                                           | 2.72726 | 34.6645 | 44.4863    | 1         |
| CPEB2     | 0.0405616    | 0.262268                                                                                                        | -3.81289                                                                                                         | 2.72636 | 64.8208 | 83.2145    | 1         |
| EIF1AY    | 0.0405729    | -234.755                                                                                                        | 234.755                                                                                                          | 2.72616 | 61.903  | 79.4747    | 1         |
| RNF135    | 0.0407577    | -0.411477                                                                                                       | -2.43027                                                                                                         | 2.7228  | 35.3676 | 45.4631    | 1         |

| Gene ID      | p-value (Dx) | MeanRatio (DIPG vs. Astrocytoma and Ependymoma and Glioneural Tumor and JPA and Medulloblastoma and Meningioma) | FoldChange (DIPG vs. Astrocytoma and Ependymoma and Glioneural Tumor and JPA and Medulloblastoma and Meningioma) | F(Dx)   | SS(Dx)  | SS (Error) | F (Error) |
|--------------|--------------|-----------------------------------------------------------------------------------------------------------------|------------------------------------------------------------------------------------------------------------------|---------|---------|------------|-----------|
| CD97         | 0.0407667    | -2.63455                                                                                                        | 2.63455                                                                                                          | 2.72263 | 53.8174 | 69.1834    | 1         |
| KIAA0367     | 0.0407721    | 0.411907                                                                                                        | -2.42773                                                                                                         | 2.72254 | 152.335 | 195.837    | 1         |
| ATP6V1G2     | 0.0408522    | 3.07613                                                                                                         | 3.07613                                                                                                          | 2.72109 | 49.9052 | 64.1906    | 1         |
| CLIC3        | 0.0410767    | 0.401277                                                                                                        | -2.49204                                                                                                         | 2.71704 | 22.6442 | 29.1695    | 1         |
| ENG          | 0.0411074    | 0.0468844                                                                                                       | -21.329                                                                                                          | 2.71649 | 33.2926 | 42.8951    | 1         |
| MYLK         | 0.0412344    | -0.0859786                                                                                                      | -11.6308                                                                                                         | 2.71421 | 43.0497 | 55.5129    | 1         |
| SH3KBP1      | 0.0413051    | -0.495881                                                                                                       | -2.01661                                                                                                         | 2.71295 | 88.0544 | 113.6      | 1         |
| RNF41        | 0.0416252    | -0.0858596                                                                                                      | -11.6469                                                                                                         | 2.70725 | 30.6474 | 39.6218    | 1         |
| LOC401074    | 0.0416811    | 0.396456                                                                                                        | -2.52235                                                                                                         | 2.70626 | 22.6382 | 29.278     | 1         |
| HS3ST1       | 0.0417219    | 2.50496                                                                                                         | 2.50496                                                                                                          | 2.70554 | 49.7113 | 64.3086    | 1         |
| CNOT2        | 0.0418341    | 0.260782                                                                                                        | -3.83461                                                                                                         | 2.70356 | 93.7964 | 121.428    | 1         |
| TPD52        | 0.0418412    | 0.110649                                                                                                        | -9.03763                                                                                                         | 2.70343 | 54.005  | 69.9176    | 1         |
| KCNMA1       | 0.0420122    | 0.253434                                                                                                        | -3.9458                                                                                                          | 2.70042 | 32.755  | 42.4535    | 1         |
| SERPINE2     | 0.0420294    | 10.4051                                                                                                         | 10.4051                                                                                                          | 2.70012 | 83.9575 | 108.829    | 1         |
| FERMT3       | 0.0420885    | -3.64296                                                                                                        | 3.64296                                                                                                          | 2.69908 | 24.6625 | 31.9807    | 1         |
| SHANK2       | 0.042229     | -0.0588826                                                                                                      | -16.9829                                                                                                         | 2.69663 | 29.1127 | 37.7859    | 1         |
| PCGF5        | 0.042239     | -6.4806                                                                                                         | 6.4806                                                                                                           | 2.69645 | 25.3466 | 32.8999    | 1         |
| IGSF9        | 0.0423856    | -5.0228                                                                                                         | 5.0228                                                                                                           | 2.6939  | 33.1296 | 43.043     | 1         |
| FOXN4        | 0.0424292    | -2.78953                                                                                                        | 2.78953                                                                                                          | 2.69314 | 44.8103 | 58.2354    | 1         |
| CLDN10       | 0.0424796    | -0.18102                                                                                                        | -5.52424                                                                                                         | 2.69227 | 57.8907 | 75.2591    | 1         |
| HLA-B        | 0.0427405    | 0.0822888                                                                                                       | -12.1523                                                                                                         | 2.68775 | 118.289 | 154.037    | 1         |
| SPTBN4       | 0.0428868    | -0.0646898                                                                                                      | -15.4584                                                                                                         | 2.68524 | 22.3342 | 29.1108    | 1         |
| ALPL         | 0.0429206    | -8.20278                                                                                                        | 8.20278                                                                                                          | 2.68466 | 99.275  | 129.425    | 1         |
| TP53TG3      | 0.0429337    | -0.2638                                                                                                         | -3.79075                                                                                                         | 2.68443 | 39.5556 | 51.5731    | 1         |
| NTNG1        | 0.0430249    | -0.259711                                                                                                       | -3.85044                                                                                                         | 2.68287 | 76.5587 | 99.8764    | 1         |
| LY86         | 0.0431019    | -0.296298                                                                                                       | -3.37498                                                                                                         | 2.68155 | 60.1742 | 78.5402    | 1         |
| LOC100132979 | 0.0431258    | -0.490173                                                                                                       | -2.04009                                                                                                         | 2.68115 | 55.8637 | 72.9252    | 1         |

| Gene ID  | p-value (Dx) | MeanRatio (DIPG vs. Astrocytoma and Ependymoma and Glioneural Tumor and JPA and Medulloblastoma and Meningioma) | FoldChange (DIPG vs. Astrocytoma and Ependymoma and Glioneural Tumor and JPA and Medulloblastoma and Meningioma) | F(Dx)   | SS(Dx)  | SS (Error) | F (Error) |
|----------|--------------|-----------------------------------------------------------------------------------------------------------------|------------------------------------------------------------------------------------------------------------------|---------|---------|------------|-----------|
| D4S234E  | 0.0432154    | -0.0999659                                                                                                      | -10.0034                                                                                                         | 2.67962 | 142.42  | 186.023    | 1         |
| SYN1     | 0.0433641    | 8.77569                                                                                                         | 8.77569                                                                                                          | 2.67709 | 264.528 | 345.842    | 1         |
| TMEM100  | 0.0434462    | 0.313399                                                                                                        | -3.19082                                                                                                         | 2.6757  | 106.475 | 139.277    | 1         |
| RPRM     | 0.0435126    | -0.487272                                                                                                       | -2.05224                                                                                                         | 2.67457 | 95.2179 | 124.604    | 1         |
| OTX2     | 0.0435307    | 3.10954                                                                                                         | 3.10954                                                                                                          | 2.67427 | 16.1223 | 21.1003    | 1         |
| AATK     | 0.0435624    | 0.21331                                                                                                         | -4.68802                                                                                                         | 2.67373 | 14.2352 | 18.6344    | 1         |
| KYNU     | 0.0435805    | 0.47865                                                                                                         | -2.08921                                                                                                         | 2.67343 | 38.9784 | 51.0298    | 1         |
| TMEM99   | 0.0435982    | 0.473852                                                                                                        | -2.11037                                                                                                         | 2.67313 | 40.4508 | 52.9634    | 1         |
| AIF1     | 0.0436266    | 0.0786434                                                                                                       | -12.7156                                                                                                         | 2.67265 | 93.3791 | 122.286    | 1         |
| RTN2     | 0.0436346    | 0.0343686                                                                                                       | -29.0963                                                                                                         | 2.67251 | 18.3421 | 24.0213    | 1         |
| UBE2L3   | 0.0437161    | -0.261412                                                                                                       | -3.82538                                                                                                         | 2.67114 | 36.5033 | 47.8304    | 1         |
| CNTN2    | 0.043766     | 0.435703                                                                                                        | -2.29514                                                                                                         | 2.6703  | 385.388 | 505.133    | 1         |
| SULT1A4  | 0.0437945    | -0.363238                                                                                                       | -2.75302                                                                                                         | 2.66982 | 51.4701 | 67.4746    | 1         |
| SLA      | 0.0438482    | 0.160547                                                                                                        | -6.22871                                                                                                         | 2.66892 | 48.0631 | 63.0295    | 1         |
| MEIS3P1  | 0.0439224    | -0.342285                                                                                                       | -2.92155                                                                                                         | 2.66768 | 51.5159 | 67.589     | 1         |
| NSF      | 0.0439971    | -4.61477                                                                                                        | 4.61477                                                                                                          | 2.66643 | 58.7131 | 77.0679    | 1         |
| SLC16A14 | 0.0440448    | 0.178698                                                                                                        | -5.59605                                                                                                         | 2.66563 | 37.1996 | 48.8435    | 1         |
| GSTM1    | 0.0440928    | 0.208266                                                                                                        | -4.80156                                                                                                         | 2.66483 | 103.597 | 136.065    | 1         |
| CTXN3    | 0.04413      | 0.0311152                                                                                                       | -32.1386                                                                                                         | 2.66421 | 11.8175 | 15.5248    | 1         |
| EMP1     | 0.0442555    | -0.0123252                                                                                                      | -81.1348                                                                                                         | 2.66212 | 136.865 | 179.941    | 1         |
| DTNA     | 0.0443111    | -0.0924163                                                                                                      | -10.8206                                                                                                         | 2.6612  | 157.643 | 207.332    | 1         |
| CDT1     | 0.044352     | 24.0663                                                                                                         | 24.0663                                                                                                          | 2.66052 | 30.5073 | 40.1334    | 1         |
| BEND7    | 0.0444227    | -4.9155                                                                                                         | 4.9155                                                                                                           | 2.65935 | 29.0102 | 38.1807    | 1         |
| NT5DC3   | 0.0444524    | -8.22707                                                                                                        | 8.22707                                                                                                          | 2.65886 | 47.1708 | 62.0935    | 1         |
| RASSF6   | 0.044505     | -0.0742337                                                                                                      | -13.471                                                                                                          | 2.65799 | 20.2555 | 26.6722    | 1         |
| APOE     | 0.0445818    | 5.96412                                                                                                         | 5.96412                                                                                                          | 2.65672 | 73.1626 | 96.3854    | 1         |
| TRIM36   | 0.0446942    | -0.200795                                                                                                       | -4.98019                                                                                                         | 2.65487 | 18.9382 | 24.9668    | 1         |

| Gene ID      | p-value (Dx) | MeanRatio (DIPG vs. Astrocytoma and Ependymoma and Glioneural Tumor and JPA and Medulloblastoma and Meningioma) | FoldChange (DIPG vs. Astrocytoma and Ependymoma and Glioneural Tumor and JPA and Medulloblastoma and Meningioma) | F(Dx)   | SS(Dx)  | SS (Error) | F (Error) |
|--------------|--------------|-----------------------------------------------------------------------------------------------------------------|------------------------------------------------------------------------------------------------------------------|---------|---------|------------|-----------|
| DST          | 0.0450696    | -2.96517                                                                                                        | 2.96517                                                                                                          | 2.64873 | 32.2372 | 42.5978    | 1         |
| SH2B3        | 0.0450851    | -0.386621                                                                                                       | -2.58651                                                                                                         | 2.64847 | 61.7155 | 81.558     | 1         |
| FAM114A1     | 0.0452491    | 0.131511                                                                                                        | -7.6039                                                                                                          | 2.64581 | 26.9005 | 35.5853    | 1         |
| FZD2         | 0.0452547    | 2.58843                                                                                                         | 2.58843                                                                                                          | 2.64572 | 56.8919 | 75.2618    | 1         |
| CHRM3        | 0.0453355    | 0.103876                                                                                                        | -9.62689                                                                                                         | 2.64441 | 50.5245 | 66.8716    | 1         |
| SLC7A7       | 0.0453871    | 0.225426                                                                                                        | -4.43604                                                                                                         | 2.64357 | 59.3157 | 78.5319    | 1         |
| CMTM3        | 0.0454298    | 0.0648651                                                                                                       | -15.4166                                                                                                         | 2.64288 | 37.4616 | 49.6109    | 1         |
| TMED10       | 0.0454468    | -0.33311                                                                                                        | -3.00201                                                                                                         | 2.64261 | 105.147 | 139.262    | 1         |
| MYLK         | 0.0455195    | -8.97532                                                                                                        | 8.97532                                                                                                          | 2.64143 | 28.0498 | 37.167     | 1         |
| RND3         | 0.0457034    | -0.138585                                                                                                       | -7.21581                                                                                                         | 2.63848 | 183.992 | 244.07     | 1         |
| RNF14        | 0.0457311    | 17.3894                                                                                                         | 17.3894                                                                                                          | 2.63803 | 88.1166 | 116.908    | 1         |
| SLC24A4      | 0.0457685    | 0.134626                                                                                                        | -7.428                                                                                                           | 2.63743 | 11.5717 | 15.3562    | 1         |
| LOC283755    | 0.045772     | -0.199379                                                                                                       | -5.01558                                                                                                         | 2.63738 | 54.3873 | 72.1761    | 1         |
| PDE5A        | 0.0458857    | 3.83145                                                                                                         | 3.83145                                                                                                          | 2.63556 | 153.486 | 203.829    | 1         |
| LOC100128892 | 0.0462643    | 0.16863                                                                                                         | -5.93013                                                                                                         | 2.62953 | 40.6855 | 54.154     | 1         |
| SPSB1        | 0.0463068    | 6.04704                                                                                                         | 6.04704                                                                                                          | 2.62885 | 38.5931 | 51.382     | 1         |
| OR2A9P       | 0.0464583    | 0.18443                                                                                                         | -5.42211                                                                                                         | 2.62646 | 23.7518 | 31.6514    | 1         |
| LRR9         | 0.0468669    | 0.470383                                                                                                        | -2.12593                                                                                                         | 2.62004 | 23.1003 | 30.8587    | 1         |
| DTNBP1       | 0.0468907    | -2.02419                                                                                                        | 2.02419                                                                                                          | 2.61967 | 25.2378 | 33.7189    | 1         |
| LRRN2        | 0.0469206    | -0.115563                                                                                                       | -8.65328                                                                                                         | 2.6192  | 57.6437 | 77.0284    | 1         |
| SLC5A10      | 0.04707      | -0.484214                                                                                                       | -2.0652                                                                                                          | 2.61687 | 19.5641 | 26.1664    | 1         |
| RHBDF2       | 0.0471222    | 0.0278909                                                                                                       | -35.854                                                                                                          | 2.61606 | 47.0722 | 62.9774    | 1         |
| POU3F1       | 0.0471401    | -2.75263                                                                                                        | 2.75263                                                                                                          | 2.61578 | 29.3637 | 39.2896    | 1         |
| NPR3         | 0.0472639    | 0.186869                                                                                                        | -5.35135                                                                                                         | 2.61386 | 21.2206 | 28.4146    | 1         |
| GAPT         | 0.0473039    | -0.221564                                                                                                       | -4.51338                                                                                                         | 2.61324 | 24.2218 | 32.4411    | 1         |
| NSF          | 0.0475382    | 0.155769                                                                                                        | -6.41975                                                                                                         | 2.60962 | 72.1492 | 96.7657    | 1         |
| UBE2C        | 0.0476455    | 76.355                                                                                                          | 76.355                                                                                                           | 2.60797 | 194.884 | 261.541    | 1         |

| Gene ID      | p-value (Dx) | MeanRatio (DIPG vs. Astrocytoma and Ependymoma and Glioneural Tumor and JPA and Medulloblastoma and Meningioma) | FoldChange (DIPG vs. Astrocytoma and Ependymoma and Glioneural Tumor and JPA and Medulloblastoma and Meningioma) | F(Dx)   | SS(Dx)  | SS (Error) | F (Error) |
|--------------|--------------|-----------------------------------------------------------------------------------------------------------------|------------------------------------------------------------------------------------------------------------------|---------|---------|------------|-----------|
| LRRC6        | 0.0477393    | -0.31027                                                                                                        | -3.223                                                                                                           | 2.60653 | 28.5251 | 38.3029    | 1         |
| RIT2         | 0.0477508    | 6.30693                                                                                                         | 6.30693                                                                                                          | 2.60636 | 79.9074 | 107.305    | 1         |
| SLC22A2      | 0.0477871    | 0.37021                                                                                                         | -2.70117                                                                                                         | 2.6058  | 25.3722 | 34.0789    | 1         |
| EBF4         | 0.0478717    | 2.58002                                                                                                         | 2.58002                                                                                                          | 2.60451 | 28.5228 | 38.3296    | 1         |
| RBMS1        | 0.0483171    | 0.109075                                                                                                        | -9.16802                                                                                                         | 2.59773 | 32.6538 | 43.9954    | 1         |
| SCARA3       | 0.0484675    | 2.0177                                                                                                          | 2.0177                                                                                                           | 2.59546 | 24.5932 | 33.1641    | 1         |
| LOC646278    | 0.0486148    | -0.215994                                                                                                       | -4.62975                                                                                                         | 2.59324 | 31.0978 | 41.9715    | 1         |
| COL4A5       | 0.0486502    | 0.220489                                                                                                        | -4.53538                                                                                                         | 2.59271 | 83.339  | 112.503    | 1         |
| ZMAT3        | 0.0486838    | -0.37199                                                                                                        | -2.68825                                                                                                         | 2.5922  | 143.247 | 193.413    | 1         |
| BTN3A2       | 0.0486934    | -0.0700103                                                                                                      | -14.2836                                                                                                         | 2.59206 | 59.2931 | 80.0622    | 1         |
| SPAG8        | 0.0487101    | 0.405659                                                                                                        | -2.46512                                                                                                         | 2.59181 | 26.797  | 36.1869    | 1         |
| PAQR6        | 0.0487964    | 0.444672                                                                                                        | -2.24885                                                                                                         | 2.59051 | 136.994 | 185.09     | 1         |
| ACRV1        | 0.0488848    | -3.68019                                                                                                        | 3.68019                                                                                                          | 2.58919 | 43.2305 | 58.4379    | 1         |
| C1orf88      | 0.0490864    | 0.164446                                                                                                        | -6.08104                                                                                                         | 2.58618 | 31.381  | 42.4693    | 1         |
| FHL2         | 0.0492884    | -3.20962                                                                                                        | 3.20962                                                                                                          | 2.58318 | 63.9537 | 86.652     | 1         |
| GHR          | 0.0494206    | -0.0759203                                                                                                      | -13.1717                                                                                                         | 2.58122 | 28.9548 | 39.2611    | 1         |
| SH3KBP1      | 0.0495061    | -0.163917                                                                                                       | -6.10064                                                                                                         | 2.57996 | 81.4963 | 110.559    | 1         |
| ANKRD20A1    | 0.0495485    | 2.42387                                                                                                         | 2.42387                                                                                                          | 2.57934 | 137.321 | 186.336    | 1         |
| MT1E         | 0.0496354    | 0.0513758                                                                                                       | -19.4644                                                                                                         | 2.57806 | 86.0068 | 116.764    | 1         |
| FAM38A       | 0.0498548    | 2.38278                                                                                                         | 2.38278                                                                                                          | 2.57484 | 58.3091 | 79.2601    | 1         |
| LOC100129443 | 0.0498551    | 0.337369                                                                                                        | -2.96412                                                                                                         | 2.57483 | 26.9004 | 36.5661    | 1         |
| FCRLA        | 0.0498791    | 0.33949                                                                                                         | -2.9456                                                                                                          | 2.57448 | 25.235  | 34.3069    | 1         |
