# Supplementary material
Source: PubMed Central journal article supplement (PMC4028366)
Supplement: NIHMS545812-supplement-401_2013_1218_MOESM10_ESM.pdf [file NIHMS545812-supplement-401_2013_1218_MOESM10_ESM.pdf]

Journal: Acta Neuropathologica

Brennan Harmon, Jordan Hall, Eric H. Raabe, Ping An, Melanie Weingart, Brian Rood, Suresh Magge, Roger J. Packer, Javad Nazari

Javad Nazarian, Children's National Medical Center, Center for Genetic Medicine

[illegible]



**Authors:** Amanda M. Saratsis, Madhuri Kambhampati, Kendall Snyder, Sridevi Yadavilli, Joe Devaney, Brennan Harmon, Jordan Hall, Eric H. Raabe, Ping An, Melanie Weingart, Brian Rood, Suresh Magge, Roger J. Packer, Javad Nazari

**Corresponding Author:**  
Javad Nazarian, Children's National Medical Center, Center for Genetic Medicine  
111 Michigan Ave, NW Washington DC 20010





















**Title:** Comparative Multidimensional Molecular Analyses of Pediatric Diffuse Intrinsic Pontine Glioma Reveals Distinct Molecular Subtypes  
**Journal:** *Acta Neuropathologica*

Javad Nazarian, Children's National Medical Center, Center for Genetic Medicine

Phone: 202-476-6022 Fax: 202-476-6014  
Email: [DMcneil@CDM4G.com](mailto:DMcneil@CDM4G.com)





























**Journal:** Acta Neuropathologica

Javad Nazarian, Children's National Medical Center, Center for Genetic Medicine

Phone: 202-476-6022 Fax: 202-476-6014  
E-mail: [DMcneil@GMAA.org](mailto:DMcneil@GMAA.org)

|    |  |                   |  |                    |
|----|--|-------------------|--|--------------------|
| n: |  | FoldChange[10] n: |  | FoldChange[111] n: |
|----|--|-------------------|--|--------------------|

Journal: Acta Neuropathologica

Javad Nazarian, Children's National Medical Center, Center for Genetic Medicine

Email: JNazarian@CNMC.org

Journal: Acta Neuropathologica

Phone: 202-476-6022 Fax: 202-476-6014

[illegible]



Javad Nazarian, Children's National Medical Center









**Title:** Comparative Multidimensional Molecular Analyses of Pediatric Diffuse Intrinsic Pontine Glioma Reveals Distinct Molecular Subtypes  
**Journal:** Acta Neuropathologica

Brennan Harmon, Jordan Hall, Eric H. Raabe, Ping An, Melanie Weingart, Brian Rood, Suresh Magge, Roger J. Packer, Javad

**Corresponding Author:**

111 Michigan Ave., NW, W

Email: JNazarian@CNMC.org

**p:** \_\_\_\_\_

[illegible]





Journal: Acta Neuropathologica

Phone: 202-476-6022 Fax: 202-476-6014

– [E-140kennel140](#) – [E-140kennel144](#) –

|      |   |           |         |               |   |         |         |             |          |        |        |             |   |          |         |               |   |           |          |               |   |   |       |       |             |   |          |          |             |   |          |          |             |   |          |         |         |   |
|------|---|-----------|---------|---------------|---|---------|---------|-------------|----------|--------|--------|-------------|---|----------|---------|---------------|---|-----------|----------|---------------|---|---|-------|-------|-------------|---|----------|----------|-------------|---|----------|----------|-------------|---|----------|---------|---------|---|
| CBL2 | 0 | 0.0485483 | -20.598 | 106 DOWN VS N | 0 | 4.18266 | 4.18266 | 111 UP VS N | 2.10E-41 | 1.0688 | 1.0688 | 112 UP VS N | 0 | 0.241033 | -4.1488 | 121 DOWN VS N | 0 | 0.0858634 | -11.9957 | 347 DOWN VS N | 0 | 0 | 2.147 | 2.147 | 353 UP VS N | 0 | 0.598831 | 0.598831 | 357 UP VS N | 0 | 0.006621 | 0.006621 | 363 UP VS N | 0 | 2.30E+15 | 37.4532 | 1.4E-14 | 1 |
|------|---|-----------|---------|---------------|---|---------|---------|-------------|----------|--------|--------|-------------|---|----------|---------|---------------|---|-----------|----------|---------------|---|---|-------|-------|-------------|---|----------|----------|-------------|---|----------|----------|-------------|---|----------|---------|---------|---|







**Title:** Comparative Multidimensional Molecular Analyses of Pediatric Diffuse Intrinsic Pontine Glioma Reveals Distinct Molecular Subtypes  
**Journal:** *Acta Neuropathologica*

Brennan Harmon, Jordan Hall, Eric H. Raabe, Ping An, Melanie Weingart, Brian Rood, Suresh Magge, Roger J. Packer, Jayad Nazarian

**Corresponding Author:**

111 Michigan Ave., NW, Washington DC, 20010

111 Michigan Ave., NW, Washington DC, 20010  
Phone: 202-476-6022 Fax: 202-476-6014

Email: [INazarian@CNMC.org](mailto:INazarian@CNMC.org)

[illegible]



























**Keywords:** Auto-Neuroanesthesiology

Brennan Harmon, Jordan Hall, Eric H. Raabe, Ping An, Melanie Weingart, Brian Rood, Suresh Magge, R...

Javad Nazarian, Children's National Medical Center, Center for Genetic Medicine  
 E.J. Mickelson, MD, NIH, Washington, DC, 20010

Phone: 202-476-6022 Fax: 202-476-6014

Phone: 202-476-6022 Fax: 202-476-6014  
E-mail: [DMcGowan@CMBAC.com](mailto:DMcGowan@CMBAC.com)

value(106, MassRatio, FoldChange(10, p), value(111, MassRatio, FoldChange(10, p)

[illegible]







Brennan Harmon, Jordan Hall, Eric H. Raabe, Ping An, Melanie Weingart, Brian Rood, Suresh Magge, Roger J. Packer, Javad Nazarian

Javad Nazarian, Children's National Medical Center, Center for Genetic Medicine  
111 Michigan Ave. NW, Washington DC 20010

Email: JNazarian@CNMC.org



**Title:** Comparative Multidimensional Molecular Analyses of Pediatric Diffuse Intrinsic Pontine Glioma Reveals Distinct Molecular Subtypes  
**Journal:** *Acta Neuropathologica*

Javad Nazarian, Children's National Medical Center, Center for Genetic Medicine

Phone: 202-476-6022 Fax: 202-476-6014

Journal: Acta Neuropathologica

Brennan Harmon, Jordan Hall, Eric H. L.

Javad Nazarian, Children's National Medical Center, Center for Genetic Medicine

111 Michigan Ave., NW, Washington DC, 20010

Phone: 202-476-6022 Fax: 202-476-6014

Email: JNazarian@CNMC.org









**Title:** Comparative Multidimensional Molecular Analyses of Pediatric Diffuse Intrinsic Pontine Glioma Reveals Distinct Molecular Subtypes  
**Journal:** Acta Neuropathologica

**Corresponding Author:**  
 Frank Monaghan, CHU Health, Maryland Medical Center, Center for Genetic Medicine

Javad Nazarian, Children's National Medical Center, Center for Genetic Medicine  
111 Michigan Ave., NW, Washington DC, 20010

Email: J.Nazarian@CNMC.org

[illegible]





Journal: Acta Neuropathologica

Phone: 202-476-6022 Fax: 202-476-6014

|            |           |               |          |            |                |             |
|------------|-----------|---------------|----------|------------|----------------|-------------|
| p-         |           | FoldChange(10 | p-       |            | FoldChange(111 | p-          |
| value[106] | MeanRatio | FoldChange(   | 6 vs. n) | value[111] | MeanRatio      | FoldChange( |
|            |           |               |          |            |                |             |

|     |     |     |     |     |     |     |     |     |     |     |     |     |     |     |     |     |     |     |     |     |     |     |     |     |     |     |     |     |     |     |     |     |     |     |     |     |     |     |     |     |     |     |     |     |     |     |     |     |     |     |     |     |     |     |     |     |     |     |     |     |     |     |     |     |     |     |     |     |     |     |     |     |     |     |     |     |     |     |     |     |     |     |     |     |     |     |     |     |     |     |     |     |     |     |     |     |     |     |     |     |     |     |     |     |     |     |     |     |     |     |     |     |     |     |     |     |     |     |     |     |     |     |     |     |     |     |     |     |     |     |     |     |     |     |     |     |     |     |     |     |     |     |     |     |     |     |     |     |     |     |     |     |     |     |     |     |     |     |     |     |     |     |     |     |     |     |     |     |     |     |     |     |     |     |     |     |     |     |     |     |     |     |     |     |     |     |     |     |     |     |     |     |     |     |     |     |     |     |     |     |     |     |     |     |     |     |     |     |     |     |     |     |     |     |     |     |     |     |     |     |     |     |     |     |     |     |     |     |     |     |     |     |     |     |     |     |     |     |     |     |     |     |     |     |     |     |     |     |     |     |     |     |     |     |     |     |     |     |     |     |     |     |     |     |     |     |     |     |     |     |     |     |     |     |     |     |     |     |     |     |     |     |     |     |     |     |     |     |     |     |     |     |     |     |     |     |     |     |     |     |     |     |     |     |     |     |     |     |     |     |     |     |     |     |     |     |     |     |     |     |     |     |     |     |     |     |     |     |     |     |     |     |     |     |     |     |     |     |     |     |     |     |     |     |     |     |     |     |     |     |     |     |     |     |     |     |     |     |     |     |     |     |     |     |     |     |     |     |     |     |     |     |     |     |     |     |     |     |     |     |     |     |     |     |     |     |     |     |     |     |     |     |     |     |     |     |     |     |     |     |     |     |     |     |     |     |     |     |     |     |     |     |     |     |     |     |     |     |     |     |     |     |     |     |     |     |     |     |     |     |     |     |     |     |     |     |     |     |     |     |     |     |     |     |     |     |     |     |     |     |     |     |     |     |     |     |     |     |     |     |     |     |     |     |     |     |     |     |     |     |     |     |     |     |     |     |     |     |     |     |     |     |     |     |     |     |     |     |     |     |     |     |     |     |     |     |     |     |     |     |     |     |     |     |     |     |     |     |     |     |
|-----|-----|-----|-----|-----|-----|-----|-----|-----|-----|-----|-----|-----|-----|-----|-----|-----|-----|-----|-----|-----|-----|-----|-----|-----|-----|-----|-----|-----|-----|-----|-----|-----|-----|-----|-----|-----|-----|-----|-----|-----|-----|-----|-----|-----|-----|-----|-----|-----|-----|-----|-----|-----|-----|-----|-----|-----|-----|-----|-----|-----|-----|-----|-----|-----|-----|-----|-----|-----|-----|-----|-----|-----|-----|-----|-----|-----|-----|-----|-----|-----|-----|-----|-----|-----|-----|-----|-----|-----|-----|-----|-----|-----|-----|-----|-----|-----|-----|-----|-----|-----|-----|-----|-----|-----|-----|-----|-----|-----|-----|-----|-----|-----|-----|-----|-----|-----|-----|-----|-----|-----|-----|-----|-----|-----|-----|-----|-----|-----|-----|-----|-----|-----|-----|-----|-----|-----|-----|-----|-----|-----|-----|-----|-----|-----|-----|-----|-----|-----|-----|-----|-----|-----|-----|-----|-----|-----|-----|-----|-----|-----|-----|-----|-----|-----|-----|-----|-----|-----|-----|-----|-----|-----|-----|-----|-----|-----|-----|-----|-----|-----|-----|-----|-----|-----|-----|-----|-----|-----|-----|-----|-----|-----|-----|-----|-----|-----|-----|-----|-----|-----|-----|-----|-----|-----|-----|-----|-----|-----|-----|-----|-----|-----|-----|-----|-----|-----|-----|-----|-----|-----|-----|-----|-----|-----|-----|-----|-----|-----|-----|-----|-----|-----|-----|-----|-----|-----|-----|-----|-----|-----|-----|-----|-----|-----|-----|-----|-----|-----|-----|-----|-----|-----|-----|-----|-----|-----|-----|-----|-----|-----|-----|-----|-----|-----|-----|-----|-----|-----|-----|-----|-----|-----|-----|-----|-----|-----|-----|-----|-----|-----|-----|-----|-----|-----|-----|-----|-----|-----|-----|-----|-----|-----|-----|-----|-----|-----|-----|-----|-----|-----|-----|-----|-----|-----|-----|-----|-----|-----|-----|-----|-----|-----|-----|-----|-----|-----|-----|-----|-----|-----|-----|-----|-----|-----|-----|-----|-----|-----|-----|-----|-----|-----|-----|-----|-----|-----|-----|-----|-----|-----|-----|-----|-----|-----|-----|-----|-----|-----|-----|-----|-----|-----|-----|-----|-----|-----|-----|-----|-----|-----|-----|-----|-----|-----|-----|-----|-----|-----|-----|-----|-----|-----|-----|-----|-----|-----|-----|-----|-----|-----|-----|-----|-----|-----|-----|-----|-----|-----|-----|-----|-----|-----|-----|-----|-----|-----|-----|-----|-----|-----|-----|-----|-----|-----|-----|-----|-----|-----|-----|-----|-----|-----|-----|-----|-----|-----|-----|-----|-----|-----|-----|-----|-----|-----|-----|-----|-----|-----|-----|-----|-----|-----|-----|-----|-----|-----|-----|-----|-----|-----|-----|-----|-----|-----|-----|-----|-----|-----|-----|-----|-----|-----|-----|-----|-----|-----|-----|-----|-----|-----|-----|-----|-----|-----|-----|-----|-----|-----|-----|-----|-----|-----|-----|-----|-----|-----|-----|-----|-----|-----|-----|-----|-----|-----|-----|-----|-----|-----|-----|-----|-----|-----|-----|-----|-----|-----|-----|-----|-----|-----|-----|-----|-----|-----|-----|-----|-----|-----|-----|-----|
| 001 | 002 | 003 | 004 | 005 | 006 | 007 | 008 | 009 | 010 | 011 | 012 | 013 | 014 | 015 | 016 | 017 | 018 | 019 | 020 | 021 | 022 | 023 | 024 | 025 | 026 | 027 | 028 | 029 | 030 | 031 | 032 | 033 | 034 | 035 | 036 | 037 | 038 | 039 | 040 | 041 | 042 | 043 | 044 | 045 | 046 | 047 | 048 | 049 | 050 | 051 | 052 | 053 | 054 | 055 | 056 | 057 | 058 | 059 | 060 | 061 | 062 | 063 | 064 | 065 | 066 | 067 | 068 | 069 | 070 | 071 | 072 | 073 | 074 | 075 | 076 | 077 | 078 | 079 | 080 | 081 | 082 | 083 | 084 | 085 | 086 | 087 | 088 | 089 | 090 | 091 | 092 | 093 | 094 | 095 | 096 | 097 | 098 | 099 | 100 | 101 | 102 | 103 | 104 | 105 | 106 | 107 | 108 | 109 | 110 | 111 | 112 | 113 | 114 | 115 | 116 | 117 | 118 | 119 | 120 | 121 | 122 | 123 | 124 | 125 | 126 | 127 | 128 | 129 | 130 | 131 | 132 | 133 | 134 | 135 | 136 | 137 | 138 | 139 | 140 | 141 | 142 | 143 | 144 | 145 | 146 | 147 | 148 | 149 | 150 | 151 | 152 | 153 | 154 | 155 | 156 | 157 | 158 | 159 | 160 | 161 | 162 | 163 | 164 | 165 | 166 | 167 | 168 | 169 | 170 | 171 | 172 | 173 | 174 | 175 | 176 | 177 | 178 | 179 | 180 | 181 | 182 | 183 | 184 | 185 | 186 | 187 | 188 | 189 | 190 | 191 | 192 | 193 | 194 | 195 | 196 | 197 | 198 | 199 | 200 | 201 | 202 | 203 | 204 | 205 | 206 | 207 | 208 | 209 | 210 | 211 | 212 | 213 | 214 | 215 | 216 | 217 | 218 | 219 | 220 | 221 | 222 | 223 | 224 | 225 | 226 | 227 | 228 | 229 | 230 | 231 | 232 | 233 | 234 | 235 | 236 | 237 | 238 | 239 | 240 | 241 | 242 | 243 | 244 | 245 | 246 | 247 | 248 | 249 | 250 | 251 | 252 | 253 | 254 | 255 | 256 | 257 | 258 | 259 | 260 | 261 | 262 | 263 | 264 | 265 | 266 | 267 | 268 | 269 | 270 | 271 | 272 | 273 | 274 | 275 | 276 | 277 | 278 | 279 | 280 | 281 | 282 | 283 | 284 | 285 | 286 | 287 | 288 | 289 | 290 | 291 | 292 | 293 | 294 | 295 | 296 | 297 | 298 | 299 | 300 | 301 | 302 | 303 | 304 | 305 | 306 | 307 | 308 | 309 | 310 | 311 | 312 | 313 | 314 | 315 | 316 | 317 | 318 | 319 | 320 | 321 | 322 | 323 | 324 | 325 | 326 | 327 | 328 | 329 | 330 | 331 | 332 | 333 | 334 | 335 | 336 | 337 | 338 | 339 | 340 | 341 | 342 | 343 | 344 | 345 | 346 | 347 | 348 | 349 | 350 | 351 | 352 | 353 | 354 | 355 | 356 | 357 | 358 | 359 | 360 | 361 | 362 | 363 | 364 | 365 | 366 | 367 | 368 | 369 | 370 | 371 | 372 | 373 | 374 | 375 | 376 | 377 | 378 | 379 | 380 | 381 | 382 | 383 | 384 | 385 | 386 | 387 | 388 | 389 | 390 | 391 | 392 | 393 | 394 | 395 | 396 | 397 | 398 | 399 | 400 | 401 | 402 | 403 | 404 | 405 | 406 | 407 | 408 | 409 | 410 | 411 | 412 | 413 | 414 | 415 | 416 | 417 | 418 | 419 | 420 | 421 | 422 | 423 | 424 | 425 | 426 | 427 | 428 | 429 | 430 | 431 | 432 | 433 | 434 | 435 | 436 | 437 | 438 | 439 | 440 | 441 | 442 | 443 | 444 | 445 | 446 | 447 | 448 | 449 | 450 | 451 | 452 | 453 | 454 | 455 | 456 | 457 | 458 | 459 | 460 | 461 | 462 | 463 | 464 | 465 | 466 | 467 | 468 | 469 | 470 | 471 | 472 | 473 | 474 | 475 | 476 | 477 | 478 | 479 | 480 | 481 | 482 | 483 | 484 | 485 | 486 | 487 | 488 | 489 | 490 | 491 | 492 | 493 | 494 | 495 | 496 | 497 | 498 | 499 | 500 | 501 | 502 | 503 | 504 | 505 | 506 | 507 | 508 | 509 | 510 | 511 |
|-----|-----|-----|-----|-----|-----|-----|-----|-----|-----|-----|-----|-----|-----|-----|-----|-----|-----|-----|-----|-----|-----|-----|-----|-----|-----|-----|-----|-----|-----|-----|-----|-----|-----|-----|-----|-----|-----|-----|-----|-----|-----|-----|-----|-----|-----|-----|-----|-----|-----|-----|-----|-----|-----|-----|-----|-----|-----|-----|-----|-----|-----|-----|-----|-----|-----|-----|-----|-----|-----|-----|-----|-----|-----|-----|-----|-----|-----|-----|-----|-----|-----|-----|-----|-----|-----|-----|-----|-----|-----|-----|-----|-----|-----|-----|-----|-----|-----|-----|-----|-----|-----|-----|-----|-----|-----|-----|-----|-----|-----|-----|-----|-----|-----|-----|-----|-----|-----|-----|-----|-----|-----|-----|-----|-----|-----|-----|-----|-----|-----|-----|-----|-----|-----|-----|-----|-----|-----|-----|-----|-----|-----|-----|-----|-----|-----|-----|-----|-----|-----|-----|-----|-----|-----|-----|-----|-----|-----|-----|-----|-----|-----|-----|-----|-----|-----|-----|-----|-----|-----|-----|-----|-----|-----|-----|-----|-----|-----|-----|-----|-----|-----|-----|-----|-----|-----|-----|-----|-----|-----|-----|-----|-----|-----|-----|-----|-----|-----|-----|-----|-----|-----|-----|-----|-----|-----|-----|-----|-----|-----|-----|-----|-----|-----|-----|-----|-----|-----|-----|-----|-----|-----|-----|-----|-----|-----|-----|-----|-----|-----|-----|-----|-----|-----|-----|-----|-----|-----|-----|-----|-----|-----|-----|-----|-----|-----|-----|-----|-----|-----|-----|-----|-----|-----|-----|-----|-----|-----|-----|-----|-----|-----|-----|-----|-----|-----|-----|-----|-----|-----|-----|-----|-----|-----|-----|-----|-----|-----|-----|-----|-----|-----|-----|-----|-----|-----|-----|-----|-----|-----|-----|-----|-----|-----|-----|-----|-----|-----|-----|-----|-----|-----|-----|-----|-----|-----|-----|-----|-----|-----|-----|-----|-----|-----|-----|-----|-----|-----|-----|-----|-----|-----|-----|-----|-----|-----|-----|-----|-----|-----|-----|-----|-----|-----|-----|-----|-----|-----|-----|-----|-----|-----|-----|-----|-----|-----|-----|-----|-----|-----|-----|-----|-----|-----|-----|-----|-----|-----|-----|-----|-----|-----|-----|-----|-----|-----|-----|-----|-----|-----|-----|-----|-----|-----|-----|-----|-----|-----|-----|-----|-----|-----|-----|-----|-----|-----|-----|-----|-----|-----|-----|-----|-----|-----|-----|-----|-----|-----|-----|-----|-----|-----|-----|-----|-----|-----|-----|-----|-----|-----|-----|-----|-----|-----|-----|-----|-----|-----|-----|-----|-----|-----|-----|-----|-----|-----|-----|-----|-----|-----|-----|-----|-----|-----|-----|-----|-----|-----|-----|-----|-----|-----|-----|-----|-----|-----|-----|-----|-----|-----|-----|-----|-----|-----|-----|-----|-----|-----|-----|-----|-----|-----|-----|-----|-----|-----|-----|-----|-----|-----|-----|-----|-----|-----|-----|-----|-----|-----|-----|-----|-----|-----|-----|-----|-----|-----|-----|-----|-----|-----|-----|-----|-----|-----|-----|-----|-----|-----|-----|-----|-----|-----|-----|-----|-----|-----|-----|-----|-----|-----|-----|

Journal: Acta Neuropathologica

Javad Nazarian, Children's National Medical Center, Center for Genetic Medicine

Phone: 202-476-6022 Fax: 202-476-6014  
Email: [DMcGowan@CMAA.org](mailto:DMcGowan@CMAA.org)

| n: | FoldChange[10] | n: | FoldChange[111] | n: |
|----|----------------|----|-----------------|----|
|----|----------------|----|-----------------|----|













**Title:** Comparative Multidimensional Molecular Analyses of Pediatric Diffuse Intrinsic Pontine Glioma Reveals Distinct Molecular Subtypes  
**Journal:** Acta Neuropathologica

Phone: 202-476-6022 Fax: 202-476-6014

REPRINTED FROM THE JOURNAL OF CLIMATE © 2005 BY AMERICAN METEOROLOGICAL SOCIETY

[illegible]









Journal: Acta Neuropathologica

Brennan Harmon, Jordan Hall, Eric H. Raabe, Ping An, Melanie Weingart, Brian Rood, Suresh Magge, Roger J. Packer, Javad Nazari

Javad Nazarian, Children's National Medical Center, Center for Genetic Medicine

Email: JNazarian@CNMC.org





**Authors:** Amanda M. Saratsis, Madhuri Kambhampati, Kendall Snow

**Corresponding Author:**

111 Michigan Ave., NW, Washington DC, 20010  
Phone: 202-476-6022 Fax: 202-476-6014

| p- | FoldChange(10 | p- | FoldChange(111 | p- |
|----|---------------|----|----------------|----|
|----|---------------|----|----------------|----|











[illegible]















**Title:** Comparative Multidimensional Molecular Analyses of Pediatric Diffuse Intrinsic Pontine Glioma Reveals Distinct Molecular Subtypes

© 2008 Pearson Education, Inc. All rights reserved. Printed in the United States of America. This publication is protected by copyright. Any unauthorized reproduction or distribution without prior written permission from Pearson Education, Inc., may result in legal action.

Brennan Harmon, Jordan Hall, Eric H. Raabe, Ping An, Melanie Weingart, Brian Rood, Suresh Magree, Roger J. Packer, Jayad Nazarian

**Corresponding Author:**

111 Michigan Ave. NW, Washington DC 20010

Phone: 202-476-6022 Fax: 202-476-6014  
Email: [INazarian@CNMC.org](mailto:INazarian@CNMC.org)

|    |  |                   |  |                    |
|----|--|-------------------|--|--------------------|
| n: |  | FoldChange[10] n: |  | FoldChange[111] n: |
|----|--|-------------------|--|--------------------|













File: ESM\_10 (Online Resource 10)

Title: Comparative Multidimensional Molecular Analyses of Pelagic Diffuse Invertebrate Planktonic Gloms Reveals Distinct Molecular Subtypes

Journal: Acta Neurologica

Authors: Amanda M. Sontis, Madhuri Kumbhakar, Kendall Sykes, Sidicki Yavuz, Joe Deveney,

Breanna Harmon, Jordan Hall, Eric H. Raabe, Ping An, Melanie Weingart, Brian Reid, Sarah Magee, Roger J. Packer, Javad Nazarian

Corresponding Author:

Javad Nazarian, Children's National Medical Center, Center for Genetic Medicine,

111 Michigan Ave., NW, Washington DC, 20010

Phone: 202-476-6022 Fax: 202-476-6014

Email: J.Nazarian@CNMC.org

| Gene ID | p-value | n | 106 vs. n | 106 vs. n | p-value | n | 111 vs. n | 111 vs. n | p-value | n | 112 vs. n | 112 vs. n | p-value | n | 121 vs. n | 121 vs. n | p-value | n | 133 vs. n | 133 vs. n | p-value | n | 137 vs. n | 137 vs. n | p-value | n | 153 vs. n | 153 vs. n | p-value | n | 156 vs. n | 156 vs. n | p-value | n | 157 vs. n | 157 vs. n | p-value | n | 158 vs. n | 158 vs. n | p-value | n | 159 vs. n | 159 vs. n | p-value | n | 160 vs. n | 160 vs. n | p-value | n | 161 vs. n | 161 vs. n | p-value | n | 162 vs. n | 162 vs. n | p-value | n | 163 vs. n | 163 vs. n | p-value | n | 164 vs. n | 164 vs. n | p-value | n | 165 vs. n | 165 vs. n | p-value | n | 166 vs. n | 166 vs. n | p-value | n | 167 vs. n | 167 vs. n | p-value | n | 168 vs. n | 168 vs. n | p-value | n | 169 vs. n | 169 vs. n | p-value | n | 170 vs. n | 170 vs. n | p-value | n | 171 vs. n | 171 vs. n | p-value | n | 172 vs. n | 172 vs. n | p-value | n | 173 vs. n | 173 vs. n | p-value | n | 174 vs. n | 174 vs. n | p-value | n | 175 vs. n | 175 vs. n | p-value | n | 176 vs. n | 176 vs. n | p-value | n | 177 vs. n | 177 vs. n | p-value | n | 178 vs. n | 178 vs. n | p-value | n | 179 vs. n | 179 vs. n | p-value | n | 180 vs. n | 180 vs. n | p-value | n | 181 vs. n | 181 vs. n | p-value | n | 182 vs. n | 182 vs. n | p-value | n | 183 vs. n | 183 vs. n | p-value | n | 184 vs. n | 184 vs. n | p-value | n | 185 vs. n | 185 vs. n | p-value | n | 186 vs. n | 186 vs. n | p-value | n | 187 vs. n | 187 vs. n | p-value | n | 188 vs. n | 188 vs. n | p-value | n | 189 vs. n | 189 vs. n | p-value | n | 190 vs. n | 190 vs. n | p-value | n | 191 vs. n | 191 vs. n | p-value | n | 192 vs. n | 192 vs. n | p-value | n | 193 vs. n | 193 vs. n | p-value | n | 194 vs. n | 194 vs. n | p-value | n | 195 vs. n | 195 vs. n | p-value | n | 196 vs. n | 196 vs. n | p-value | n | 197 vs. n | 197 vs. n | p-value | n | 198 vs. n | 198 vs. n | p-value | n | 199 vs. n | 199 vs. n | p-value | n | 200 vs. n | 200 vs. n | p-value | n | 201 vs. n | 201 vs. n | p-value | n | 202 vs. n | 202 vs. n | p-value | n | 203 vs. n | 203 vs. n | p-value | n | 204 vs. n | 204 vs. n | p-value | n | 205 vs. n | 205 vs. n | p-value | n | 206 vs. n | 206 vs. n | p-value | n | 207 vs. n | 207 vs. n | p-value | n | 208 vs. n | 208 vs. n | p-value | n | 209 vs. n | 209 vs. n | p-value | n | 210 vs. n | 210 vs. n | p-value | n | 211 vs. n | 211 vs. n | p-value | n | 212 vs. n | 212 vs. n | p-value | n | 213 vs. n | 213 vs. n | p-value | n | 214 vs. n | 214 vs. n | p-value | n | 215 vs. n | 215 vs. n | p-value | n | 216 vs. n | 216 vs. n | p-value | n | 217 vs. n | 217 vs. n | p-value | n | 218 vs. n | 218 vs. n | p-value | n | 219 vs. n | 219 vs. n | p-value | n | 220 vs. n | 220 vs. n | p-value | n | 221 vs. n | 221 vs. n | p-value | n | 222 vs. n | 222 vs. n | p-value | n | 223 vs. n | 223 vs. n | p-value | n | 224 vs. n | 224 vs. n | p-value | n | 225 vs. n | 225 vs. n | p-value | n | 226 vs. n | 226 vs. n | p-value | n | 227 vs. n | 227 vs. n | p-value | n | 228 vs. n | 228 vs. n | p-value | n | 229 vs. n | 229 vs. n | p-value | n | 230 vs. n | 230 vs. n | p-value | n | 231 vs. n | 231 vs. n | p-value | n | 232 vs. n | 232 vs. n | p-value | n | 233 vs. n | 233 vs. n | p-value | n | 234 vs. n | 234 vs. n | p-value | n | 235 vs. n | 235 vs. n | p-value | n | 236 vs. n | 236 vs. n | p-value | n | 237 vs. n | 237 vs. n | p-value | n | 238 vs. n | 238 vs. n | p-value | n | 239 vs. n | 239 vs. n | p-value | n | 240 vs. n | 240 vs. n | p-value | n | 241 vs. n | 241 vs. n | p-value | n | 242 vs. n | 242 vs. n | p-value | n | 243 vs. n | 243 vs. n | p-value | n | 244 vs. n | 244 vs. n | p-value | n | 245 vs. n | 245 vs. n | p-value | n | 246 vs. n | 246 vs. n | p-value | n | 247 vs. n | 247 vs. n | p-value | n | 248 vs. n | 248 vs. n | p-value | n | 249 vs. n | 249 vs. n | p-value | n | 250 vs. n | 250 vs. n | p-value | n | 251 vs. n | 251 vs. n | p-value | n | 252 vs. n | 252 vs. n | p-value | n | 253 vs. n | 253 vs. n | p-value | n | 254 vs. n | 254 vs. n | p-value | n | 255 vs. n | 255 vs. n | p-value | n | 256 vs. n | 256 vs. n | p-value | n | 257 vs. n | 257 vs. n | p-value | n | 258 vs. n | 258 vs. n | p-value | n | 259 vs. n | 259 vs. n | p-value | n | 260 vs. n | 260 vs. n | p-value | n | 261 vs. n | 261 vs. n | p-value | n | 262 vs. n | 262 vs. n | p-value | n | 263 vs. n | 263 vs. n | p-value | n | 264 vs. n | 264 vs. n | p-value | n | 265 vs. n | 265 vs. n | p-value | n | 266 vs. n | 266 vs. n | p-value | n | 267 vs. n | 267 vs. n | p-value | n | 268 vs. n | 268 vs. n | p-value | n | 269 vs. n | 269 vs. n | p-value | n | 270 vs. n | 270 vs. n | p-value | n | 271 vs. n | 271 vs. n | p-value | n | 272 vs. n | 272 vs. n | p-value | n | 273 vs. n | 273 vs. n | p-value | n | 274 vs. n | 274 vs. n | p-value | n | 275 vs. n | 275 vs. n | p-value | n | 276 vs. n | 276 vs. n | p-value | n | 277 vs. n | 277 vs. n | p-value | n | 278 vs. n | 278 vs. n | p-value | n | 279 vs. n | 279 vs. n | p-value | n | 280 vs. n | 280 vs. n | p-value | n | 281 vs. n | 281 vs. n | p-value | n | 282 vs. n | 282 vs. n | p-value | n | 283 vs. n | 283 vs. n | p-value | n | 284 vs. n | 284 vs. n | p-value | n | 285 vs. n | 285 vs. n | p-value | n | 286 vs. n | 286 vs. n | p-value | n | 287 vs. n | 287 vs. n | p-value | n | 288 vs. n | 288 vs. n | p-value | n | 289 vs. n | 289 vs. n | p-value | n | 290 vs. n | 290 vs. n | p-value | n | 291 vs. n | 291 vs. n | p-value | n | 292 vs. n | 292 vs. n | p-value | n | 293 vs. n | 293 vs. n | p-value | n | 294 vs. n | 294 vs. n | p-value | n | 295 vs. n | 295 vs. n | p-value | n | 296 vs. n | 296 vs. n | p-value | n | 297 vs. n | 297 vs. n | p-value | n | 298 vs. n | 298 vs. n | p-value | n | 299 vs. n | 299 vs. n | p-value | n | 300 vs. n | 300 vs. n | p-value | n | 301 vs. n | 301 vs. n | p-value | n | 302 vs. n | 302 vs. n | p-value | n | 303 vs. n | 303 vs. n | p-value | n | 304 vs. n | 304 vs. n | p-value | n | 305 vs. n | 305 vs. n | p-value | n | 306 vs. n |
|---------|---------|---|-----------|-----------|---------|---|-----------|-----------|---------|---|-----------|-----------|---------|---|-----------|-----------|---------|---|-----------|-----------|---------|---|-----------|-----------|---------|---|-----------|-----------|---------|---|-----------|-----------|---------|---|-----------|-----------|---------|---|-----------|-----------|---------|---|-----------|-----------|---------|---|-----------|-----------|---------|---|-----------|-----------|---------|---|-----------|-----------|---------|---|-----------|-----------|---------|---|-----------|-----------|---------|---|-----------|-----------|---------|---|-----------|-----------|---------|---|-----------|-----------|---------|---|-----------|-----------|---------|---|-----------|-----------|---------|---|-----------|-----------|---------|---|-----------|-----------|---------|---|-----------|-----------|---------|---|-----------|-----------|---------|---|-----------|-----------|---------|---|-----------|-----------|---------|---|-----------|-----------|---------|---|-----------|-----------|---------|---|-----------|-----------|---------|---|-----------|-----------|---------|---|-----------|-----------|---------|---|-----------|-----------|---------|---|-----------|-----------|---------|---|-----------|-----------|---------|---|-----------|-----------|---------|---|-----------|-----------|---------|---|-----------|-----------|---------|---|-----------|-----------|---------|---|-----------|-----------|---------|---|-----------|-----------|---------|---|-----------|-----------|---------|---|-----------|-----------|---------|---|-----------|-----------|---------|---|-----------|-----------|---------|---|-----------|-----------|---------|---|-----------|-----------|---------|---|-----------|-----------|---------|---|-----------|-----------|---------|---|-----------|-----------|---------|---|-----------|-----------|---------|---|-----------|-----------|---------|---|-----------|-----------|---------|---|-----------|-----------|---------|---|-----------|-----------|---------|---|-----------|-----------|---------|---|-----------|-----------|---------|---|-----------|-----------|---------|---|-----------|-----------|---------|---|-----------|-----------|---------|---|-----------|-----------|---------|---|-----------|-----------|---------|---|-----------|-----------|---------|---|-----------|-----------|---------|---|-----------|-----------|---------|---|-----------|-----------|---------|---|-----------|-----------|---------|---|-----------|-----------|---------|---|-----------|-----------|---------|---|-----------|-----------|---------|---|-----------|-----------|---------|---|-----------|-----------|---------|---|-----------|-----------|---------|---|-----------|-----------|---------|---|-----------|-----------|---------|---|-----------|-----------|---------|---|-----------|-----------|---------|---|-----------|-----------|---------|---|-----------|-----------|---------|---|-----------|-----------|---------|---|-----------|-----------|---------|---|-----------|-----------|---------|---|-----------|-----------|---------|---|-----------|-----------|---------|---|-----------|-----------|---------|---|-----------|-----------|---------|---|-----------|-----------|---------|---|-----------|-----------|---------|---|-----------|-----------|---------|---|-----------|-----------|---------|---|-----------|-----------|---------|---|-----------|-----------|---------|---|-----------|-----------|---------|---|-----------|-----------|---------|---|-----------|-----------|---------|---|-----------|-----------|---------|---|-----------|-----------|---------|---|-----------|-----------|---------|---|-----------|-----------|---------|---|-----------|-----------|---------|---|-----------|-----------|---------|---|-----------|-----------|---------|---|-----------|-----------|---------|---|-----------|-----------|---------|---|-----------|-----------|---------|---|-----------|-----------|---------|---|-----------|-----------|---------|---|-----------|-----------|---------|---|-----------|-----------|---------|---|-----------|-----------|---------|---|-----------|-----------|---------|---|-----------|-----------|---------|---|-----------|-----------|---------|---|-----------|-----------|---------|---|-----------|-----------|---------|---|-----------|-----------|---------|---|-----------|-----------|---------|---|-----------|-----------|---------|---|-----------|-----------|---------|---|-----------|-----------|---------|---|-----------|-----------|---------|---|-----------|-----------|---------|---|-----------|-----------|---------|---|-----------|-----------|---------|---|-----------|-----------|---------|---|-----------|-----------|---------|---|-----------|-----------|---------|---|-----------|-----------|---------|---|-----------|-----------|---------|---|-----------|-----------|---------|---|-----------|-----------|---------|---|-----------|-----------|---------|---|-----------|-----------|---------|---|-----------|-----------|---------|---|-----------|-----------|---------|---|-----------|-----------|---------|---|-----------|-----------|---------|---|-----------|-----------|---------|---|-----------|-----------|---------|---|-----------|-----------|---------|---|-----------|-----------|---------|---|-----------|-----------|---------|---|-----------|-----------|---------|---|-----------|-----------|---------|---|-----------|-----------|---------|---|-----------|-----------|---------|---|-----------|-----------|---------|---|-----------|-----------|---------|---|-----------|-----------|---------|---|-----------|-----------|---------|---|-----------|-----------|---------|---|-----------|-----------|---------|---|-----------|-----------|---------|---|-----------|-----------|---------|---|-----------|-----------|---------|---|-----------|-----------|---------|---|-----------|-----------|---------|---|-----------|
|---------|---------|---|-----------|-----------|---------|---|-----------|-----------|---------|---|-----------|-----------|---------|---|-----------|-----------|---------|---|-----------|-----------|---------|---|-----------|-----------|---------|---|-----------|-----------|---------|---|-----------|-----------|---------|---|-----------|-----------|---------|---|-----------|-----------|---------|---|-----------|-----------|---------|---|-----------|-----------|---------|---|-----------|-----------|---------|---|-----------|-----------|---------|---|-----------|-----------|---------|---|-----------|-----------|---------|---|-----------|-----------|---------|---|-----------|-----------|---------|---|-----------|-----------|---------|---|-----------|-----------|---------|---|-----------|-----------|---------|---|-----------|-----------|---------|---|-----------|-----------|---------|---|-----------|-----------|---------|---|-----------|-----------|---------|---|-----------|-----------|---------|---|-----------|-----------|---------|---|-----------|-----------|---------|---|-----------|-----------|---------|---|-----------|-----------|---------|---|-----------|-----------|---------|---|-----------|-----------|---------|---|-----------|-----------|---------|---|-----------|-----------|---------|---|-----------|-----------|---------|---|-----------|-----------|---------|---|-----------|-----------|---------|---|-----------|-----------|---------|---|-----------|-----------|---------|---|-----------|-----------|---------|---|-----------|-----------|---------|---|-----------|-----------|---------|---|-----------|-----------|---------|---|-----------|-----------|---------|---|-----------|-----------|---------|---|-----------|-----------|---------|---|-----------|-----------|---------|---|-----------|-----------|---------|---|-----------|-----------|---------|---|-----------|-----------|---------|---|-----------|-----------|---------|---|-----------|-----------|---------|---|-----------|-----------|---------|---|-----------|-----------|---------|---|-----------|-----------|---------|---|-----------|-----------|---------|---|-----------|-----------|---------|---|-----------|-----------|---------|---|-----------|-----------|---------|---|-----------|-----------|---------|---|-----------|-----------|---------|---|-----------|-----------|---------|---|-----------|-----------|---------|---|-----------|-----------|---------|---|-----------|-----------|---------|---|-----------|-----------|---------|---|-----------|-----------|---------|---|-----------|-----------|---------|---|-----------|-----------|---------|---|-----------|-----------|---------|---|-----------|-----------|---------|---|-----------|-----------|---------|---|-----------|-----------|---------|---|-----------|-----------|---------|---|-----------|-----------|---------|---|-----------|-----------|---------|---|-----------|-----------|---------|---|-----------|-----------|---------|---|-----------|-----------|---------|---|-----------|-----------|---------|---|-----------|-----------|---------|---|-----------|-----------|---------|---|-----------|-----------|---------|---|-----------|-----------|---------|---|-----------|-----------|---------|---|-----------|-----------|---------|---|-----------|-----------|---------|---|-----------|-----------|---------|---|-----------|-----------|---------|---|-----------|-----------|---------|---|-----------|-----------|---------|---|-----------|-----------|---------|---|-----------|-----------|---------|---|-----------|-----------|---------|---|-----------|-----------|---------|---|-----------|-----------|---------|---|-----------|-----------|---------|---|-----------|-----------|---------|---|-----------|-----------|---------|---|-----------|-----------|---------|---|-----------|-----------|---------|---|-----------|-----------|---------|---|-----------|-----------|---------|---|-----------|-----------|---------|---|-----------|-----------|---------|---|-----------|-----------|---------|---|-----------|-----------|---------|---|-----------|-----------|---------|---|-----------|-----------|---------|---|-----------|-----------|---------|---|-----------|-----------|---------|---|-----------|-----------|---------|---|-----------|-----------|---------|---|-----------|-----------|---------|---|-----------|-----------|---------|---|-----------|-----------|---------|---|-----------|-----------|---------|---|-----------|-----------|---------|---|-----------|-----------|---------|---|-----------|-----------|---------|---|-----------|-----------|---------|---|-----------|-----------|---------|---|-----------|-----------|---------|---|-----------|-----------|---------|---|-----------|-----------|---------|---|-----------|-----------|---------|---|-----------|-----------|---------|---|-----------|-----------|---------|---|-----------|-----------|---------|---|-----------|-----------|---------|---|-----------|-----------|---------|---|-----------|-----------|---------|---|-----------|-----------|---------|---|-----------|-----------|---------|---|-----------|-----------|---------|---|-----------|-----------|---------|---|-----------|-----------|---------|---|-----------|-----------|---------|---|-----------|-----------|---------|---|-----------|-----------|---------|---|-----------|-----------|---------|---|-----------|-----------|---------|---|-----------|-----------|---------|---|-----------|-----------|---------|---|-----------|-----------|---------|---|-----------|-----------|---------|---|-----------|-----------|---------|---|-----------|-----------|---------|---|-----------|-----------|---------|---|-----------|-----------|---------|---|-----------|-----------|---------|---|-----------|-----------|---------|---|-----------|-----------|---------|---|-----------|-----------|---------|---|-----------|-----------|---------|---|-----------|-----------|---------|---|-----------|-----------|---------|---|-----------|



Journal: Acta Neuropathologica

Javad Nazarian, Children's National Medical Center, Center for Genetic Medicine

Phone: 202-476-6022 Fax: 202-476-6014

| value106 | MeanRatio | FoldChange |
|----------|-----------|------------|
|----------|-----------|------------|

File: ESM\_10 (Online Resource 10)

Title: Comparison of Multidimensional Molecular Analyses of Pediatric Diffuse Glioma Reveals Distinct Molecular Subtypes

Journal: Acta Neurotherapeutica

Authors: Amanda M. Stransik, Madhuri Kumbhakar, Kendall Snyder, Sidicki Yavuz, Joe Devenney,

Brennan Harmon, Jordan Hall, Eric H. Raabe, Ping An, Melanie Weingart, Brian Ross, Sarah Magee, Roger J. Packer, Javad Nazarian

Corresponding Author:

Javad Nazarian, Children's National Medical Center, Center for Genetic Medicine

111 Michigan Ave., NW, Washington DC, 20010

Phone: 202-476-6022 Fax: 202-476-6014

Email: J.Nazarian@CNMCC.org

| Gene ID | P | vs. n | FolChang106 |  | p | FolChang107 |  | p | FolChang110 |  | p | FolChang111 |  | p | FolChang112 |  | p | FolChang121 |  | p | FolChang122 |  | p | FolChang137 |  | p | FolChang138 |  | p | FolChang153 |  | p | FolChang157 |  | p | FolChang158 |  | p | FolChang159 |  | p | FolChang160 |  | p | FolChang161 |  | p | FolChang162 |  | p | FolChang163 |  | p | FolChang164 |  | p | FolChang165 |  | p | FolChang166 |  | p | FolChang167 |  | p | FolChang168 |  | p | FolChang169 |  | p | FolChang170 |  | p | FolChang171 |  | p | FolChang172 |  | p | FolChang173 |  | p | FolChang174 |  | p | FolChang175 |  | p | FolChang176 |  | p | FolChang177 |  | p | FolChang178 |  | p | FolChang179 |  | p | FolChang180 |  | p | FolChang181 |  | p | FolChang182 |  | p | FolChang183 |  | p | FolChang184 |  | p | FolChang185 |  | p | FolChang186 |  | p | FolChang187 |  | p | FolChang188 |  | p | FolChang189 |  | p | FolChang190 |  | p | FolChang191 |  | p | FolChang192 |  | p | FolChang193 |  | p | FolChang194 |  | p | FolChang195 |  | p | FolChang196 |  | p | FolChang197 |  | p | FolChang198 |  | p | FolChang199 |  | p | FolChang200 |  | p | FolChang201 |  | p | FolChang202 |  | p | FolChang203 |  | p | FolChang204 |  | p | FolChang205 |  | p | FolChang206 |  | p | FolChang207 |  | p | FolChang208 |  | p | FolChang209 |  | p | FolChang210 |  | p | FolChang211 |  | p | FolChang212 |  | p | FolChang213 |  | p | FolChang214 |  | p | FolChang215 |  | p | FolChang216 |  | p | FolChang217 |  | p | FolChang218 |  | p | FolChang219 |  | p | FolChang220 |  | p | FolChang221 |  | p | FolChang222 |  | p | FolChang223 |  | p | FolChang224 |  | p | FolChang225 |  | p | FolChang226 |  | p | FolChang227 |  | p | FolChang228 |  | p | FolChang229 |  | p | FolChang230 |  | p | FolChang231 |  | p | FolChang232 |  | p | FolChang233 |  | p | FolChang234 |  | p | FolChang235 |  | p | FolChang236 |  | p | FolChang237 |  | p | FolChang238 |  | p | FolChang239 |  | p | FolChang240 |  | p | FolChang241 |  | p | FolChang242 |  | p | FolChang243 |  | p | FolChang244 |  | p | FolChang245 |  | p | FolChang246 |  | p | FolChang247 |  | p | FolChang248 |  | p | FolChang249 |  | p | FolChang250 |  | p | FolChang251 |  | p | FolChang252 |  | p | FolChang253 |  | p | FolChang254 |  | p | FolChang255 |  | p | FolChang256 |  | p | FolChang257 |  | p | FolChang258 |  | p | FolChang259 |  | p | FolChang260 |  | p | FolChang261 |  | p | FolChang262 |  | p | FolChang263 |  | p | FolChang264 |  | p | FolChang265 |  | p | FolChang266 |  | p | FolChang267 |  | p | FolChang268 |  | p | FolChang269 |  | p | FolChang270 |  | p | FolChang271 |  | p | FolChang272 |  | p | FolChang273 |  | p | FolChang274 |  | p | FolChang275 |  | p | FolChang276 |  | p | FolChang277 |  | p | FolChang278 |  | p | FolChang279 |  | p | FolChang280 |  | p | FolChang281 |  | p | FolChang282 |  | p | FolChang283 |  | p | FolChang284 |  | p | FolChang285 |  | p | FolChang286 |  | p | FolChang287 |  | p | FolChang288 |  | p | FolChang289 |  | p | FolChang290 |  | p | FolChang291 |  | p | FolChang292 |  | p | FolChang293 |  | p | FolChang294 |  | p | FolChang295 |  | p | FolChang296 |  | p | FolChang297 |  | p | FolChang298 |  | p | FolChang299 |  | p | FolChang300 |  | p | FolChang301 |  | p | FolChang302 |  | p | FolChang303 |  | p | FolChang304 |  | p | FolChang305 |  | p | FolChang306 |  | p | FolChang307 |  | p | FolChang308 |  | p | FolChang309 |  | p | FolChang310 |  | p | FolChang311 |  | p | FolChang312 |  | p | FolChang313 |  | p | FolChang314 |  | p | FolChang315 |  | p | FolChang316 |  | p | FolChang317 |  | p | FolChang318 |  | p | FolChang319 |  | p | FolChang320 |  | p | FolChang321 |  | p | FolChang322 |  | p | FolChang323 |  | p | FolChang324 |  | p | FolChang325 |  | p | FolChang326 |  | p | FolChang327 |  | p | FolChang328 |  | p | FolChang329 |  | p | FolChang330 |  | p | FolChang331 |  | p | FolChang332 |  | p | FolChang333 |  | p | FolChang334 |  | p | FolChang335 |  | p | FolChang336 |  | p | FolChang337 |  | p | FolChang338 |  | p | FolChang339 |  | p | FolChang340 |  | p | FolChang341 |  | p | FolChang342 |  | p | FolChang343 |  | p | FolChang344 |  | p | FolChang345 |  | p | FolChang346 |  | p | FolChang347 |  | p | FolChang348 |  | p | FolChang349 |  | p | FolChang350 |  | p | FolChang351 |  | p | FolChang352 |  | p | FolChang353 |  | p | FolChang354 |  | p | FolChang355 |  | p | FolChang356 |  | p | FolChang357 |  | p | FolChang358 |  | p | FolChang359 |  | p | FolChang360 |  | p | FolChang361 |  | p | FolChang362 |  | p | FolChang363 |  | p | FolChang364 |  | p | FolChang365 |  | p | FolChang366 |  | p | FolChang367 |  | p | FolChang368 |  | p | FolChang369 |  | p | FolChang370 |  | p | FolChang371 |  | p | FolChang372 |  | p | FolChang373 |  | p | FolChang374 |  | p | FolChang375 |  | p | FolChang376 |  | p | FolChang377 |  | p | FolChang378 |  | p | FolChang379 |  | p | FolChang380 |  | p | FolChang381 |  | p | FolChang382 |  | p | FolChang383 |  | p | FolChang384 |  | p | FolChang385 |  | p | FolChang386 |  | p | FolChang387 |  | p | FolChang388 |  | p | FolChang389 |  | p | FolChang390 |  | p | FolChang391 |  | p | FolChang392 |  | p | FolChang393 |  | p | FolChang394 |  | p | FolChang395 |  | p | FolChang396 |  | p | FolChang397 |  | p | FolChang398 |  | p | FolChang399 |  | p | FolChang400 |  | p | FolChang401 |  | p | FolChang402 |  | p | FolChang403 |
|---------|---|-------|-------------|--|---|-------------|--|---|-------------|--|---|-------------|--|---|-------------|--|---|-------------|--|---|-------------|--|---|-------------|--|---|-------------|--|---|-------------|--|---|-------------|--|---|-------------|--|---|-------------|--|---|-------------|--|---|-------------|--|---|-------------|--|---|-------------|--|---|-------------|--|---|-------------|--|---|-------------|--|---|-------------|--|---|-------------|--|---|-------------|--|---|-------------|--|---|-------------|--|---|-------------|--|---|-------------|--|---|-------------|--|---|-------------|--|---|-------------|--|---|-------------|--|---|-------------|--|---|-------------|--|---|-------------|--|---|-------------|--|---|-------------|--|---|-------------|--|---|-------------|--|---|-------------|--|---|-------------|--|---|-------------|--|---|-------------|--|---|-------------|--|---|-------------|--|---|-------------|--|---|-------------|--|---|-------------|--|---|-------------|--|---|-------------|--|---|-------------|--|---|-------------|--|---|-------------|--|---|-------------|--|---|-------------|--|---|-------------|--|---|-------------|--|---|-------------|--|---|-------------|--|---|-------------|--|---|-------------|--|---|-------------|--|---|-------------|--|---|-------------|--|---|-------------|--|---|-------------|--|---|-------------|--|---|-------------|--|---|-------------|--|---|-------------|--|---|-------------|--|---|-------------|--|---|-------------|--|---|-------------|--|---|-------------|--|---|-------------|--|---|-------------|--|---|-------------|--|---|-------------|--|---|-------------|--|---|-------------|--|---|-------------|--|---|-------------|--|---|-------------|--|---|-------------|--|---|-------------|--|---|-------------|--|---|-------------|--|---|-------------|--|---|-------------|--|---|-------------|--|---|-------------|--|---|-------------|--|---|-------------|--|---|-------------|--|---|-------------|--|---|-------------|--|---|-------------|--|---|-------------|--|---|-------------|--|---|-------------|--|---|-------------|--|---|-------------|--|---|-------------|--|---|-------------|--|---|-------------|--|---|-------------|--|---|-------------|--|---|-------------|--|---|-------------|--|---|-------------|--|---|-------------|--|---|-------------|--|---|-------------|--|---|-------------|--|---|-------------|--|---|-------------|--|---|-------------|--|---|-------------|--|---|-------------|--|---|-------------|--|---|-------------|--|---|-------------|--|---|-------------|--|---|-------------|--|---|-------------|--|---|-------------|--|---|-------------|--|---|-------------|--|---|-------------|--|---|-------------|--|---|-------------|--|---|-------------|--|---|-------------|--|---|-------------|--|---|-------------|--|---|-------------|--|---|-------------|--|---|-------------|--|---|-------------|--|---|-------------|--|---|-------------|--|---|-------------|--|---|-------------|--|---|-------------|--|---|-------------|--|---|-------------|--|---|-------------|--|---|-------------|--|---|-------------|--|---|-------------|--|---|-------------|--|---|-------------|--|---|-------------|--|---|-------------|--|---|-------------|--|---|-------------|--|---|-------------|--|---|-------------|--|---|-------------|--|---|-------------|--|---|-------------|--|---|-------------|--|---|-------------|--|---|-------------|--|---|-------------|--|---|-------------|--|---|-------------|--|---|-------------|--|---|-------------|--|---|-------------|--|---|-------------|--|---|-------------|--|---|-------------|--|---|-------------|--|---|-------------|--|---|-------------|--|---|-------------|--|---|-------------|--|---|-------------|--|---|-------------|--|---|-------------|--|---|-------------|--|---|-------------|--|---|-------------|--|---|-------------|--|---|-------------|--|---|-------------|--|---|-------------|--|---|-------------|--|---|-------------|--|---|-------------|--|---|-------------|--|---|-------------|--|---|-------------|--|---|-------------|--|---|-------------|--|---|-------------|--|---|-------------|--|---|-------------|--|---|-------------|--|---|-------------|--|---|-------------|--|---|-------------|--|---|-------------|--|---|-------------|--|---|-------------|--|---|-------------|--|---|-------------|--|---|-------------|--|---|-------------|--|---|-------------|--|---|-------------|--|---|-------------|--|---|-------------|--|---|-------------|--|---|-------------|--|---|-------------|--|---|-------------|--|---|-------------|--|---|-------------|--|---|-------------|--|---|-------------|--|---|-------------|--|---|-------------|--|---|-------------|--|---|-------------|--|---|-------------|--|---|-------------|--|---|-------------|--|---|-------------|--|---|-------------|--|---|-------------|--|---|-------------|--|---|-------------|--|---|-------------|--|---|-------------|--|---|-------------|--|---|-------------|--|---|-------------|--|---|-------------|--|---|-------------|--|---|-------------|--|---|-------------|--|---|-------------|--|---|-------------|--|---|-------------|--|---|-------------|--|---|-------------|--|---|-------------|--|---|-------------|--|---|-------------|--|---|-------------|--|---|-------------|--|---|-------------|--|---|-------------|--|---|-------------|--|---|-------------|
|---------|---|-------|-------------|--|---|-------------|--|---|-------------|--|---|-------------|--|---|-------------|--|---|-------------|--|---|-------------|--|---|-------------|--|---|-------------|--|---|-------------|--|---|-------------|--|---|-------------|--|---|-------------|--|---|-------------|--|---|-------------|--|---|-------------|--|---|-------------|--|---|-------------|--|---|-------------|--|---|-------------|--|---|-------------|--|---|-------------|--|---|-------------|--|---|-------------|--|---|-------------|--|---|-------------|--|---|-------------|--|---|-------------|--|---|-------------|--|---|-------------|--|---|-------------|--|---|-------------|--|---|-------------|--|---|-------------|--|---|-------------|--|---|-------------|--|---|-------------|--|---|-------------|--|---|-------------|--|---|-------------|--|---|-------------|--|---|-------------|--|---|-------------|--|---|-------------|--|---|-------------|--|---|-------------|--|---|-------------|--|---|-------------|--|---|-------------|--|---|-------------|--|---|-------------|--|---|-------------|--|---|-------------|--|---|-------------|--|---|-------------|--|---|-------------|--|---|-------------|--|---|-------------|--|---|-------------|--|---|-------------|--|---|-------------|--|---|-------------|--|---|-------------|--|---|-------------|--|---|-------------|--|---|-------------|--|---|-------------|--|---|-------------|--|---|-------------|--|---|-------------|--|---|-------------|--|---|-------------|--|---|-------------|--|---|-------------|--|---|-------------|--|---|-------------|--|---|-------------|--|---|-------------|--|---|-------------|--|---|-------------|--|---|-------------|--|---|-------------|--|---|-------------|--|---|-------------|--|---|-------------|--|---|-------------|--|---|-------------|--|---|-------------|--|---|-------------|--|---|-------------|--|---|-------------|--|---|-------------|--|---|-------------|--|---|-------------|--|---|-------------|--|---|-------------|--|---|-------------|--|---|-------------|--|---|-------------|--|---|-------------|--|---|-------------|--|---|-------------|--|---|-------------|--|---|-------------|--|---|-------------|--|---|-------------|--|---|-------------|--|---|-------------|--|---|-------------|--|---|-------------|--|---|-------------|--|---|-------------|--|---|-------------|--|---|-------------|--|---|-------------|--|---|-------------|--|---|-------------|--|---|-------------|--|---|-------------|--|---|-------------|--|---|-------------|--|---|-------------|--|---|-------------|--|---|-------------|--|---|-------------|--|---|-------------|--|---|-------------|--|---|-------------|--|---|-------------|--|---|-------------|--|---|-------------|--|---|-------------|--|---|-------------|--|---|-------------|--|---|-------------|--|---|-------------|--|---|-------------|--|---|-------------|--|---|-------------|--|---|-------------|--|---|-------------|--|---|-------------|--|---|-------------|--|---|-------------|--|---|-------------|--|---|-------------|--|---|-------------|--|---|-------------|--|---|-------------|--|---|-------------|--|---|-------------|--|---|-------------|--|---|-------------|--|---|-------------|--|---|-------------|--|---|-------------|--|---|-------------|--|---|-------------|--|---|-------------|--|---|-------------|--|---|-------------|--|---|-------------|--|---|-------------|--|---|-------------|--|---|-------------|--|---|-------------|--|---|-------------|--|---|-------------|--|---|-------------|--|---|-------------|--|---|-------------|--|---|-------------|--|---|-------------|--|---|-------------|--|---|-------------|--|---|-------------|--|---|-------------|--|---|-------------|--|---|-------------|--|---|-------------|--|---|-------------|--|---|-------------|--|---|-------------|--|---|-------------|--|---|-------------|--|---|-------------|--|---|-------------|--|---|-------------|--|---|-------------|--|---|-------------|--|---|-------------|--|---|-------------|--|---|-------------|--|---|-------------|--|---|-------------|--|---|-------------|--|---|-------------|--|---|-------------|--|---|-------------|--|---|-------------|--|---|-------------|--|---|-------------|--|---|-------------|--|---|-------------|--|---|-------------|--|---|-------------|--|---|-------------|--|---|-------------|--|---|-------------|--|---|-------------|--|---|-------------|--|---|-------------|--|---|-------------|--|---|-------------|--|---|-------------|--|---|-------------|--|---|-------------|--|---|-------------|--|---|-------------|--|---|-------------|--|---|-------------|--|---|-------------|--|---|-------------|--|---|-------------|--|---|-------------|--|---|-------------|--|---|-------------|--|---|-------------|--|---|-------------|--|---|-------------|--|---|-------------|--|---|-------------|--|---|-------------|--|---|-------------|--|---|-------------|--|---|-------------|--|---|-------------|--|---|-------------|--|---|-------------|--|---|-------------|--|---|-------------|--|---|-------------|--|---|-------------|--|---|-------------|--|---|-------------|--|---|-------------|--|---|-------------|--|---|-------------|--|---|-------------|--|---|-------------|--|---|-------------|--|---|-------------|--|---|-------------|--|---|-------------|--|---|-------------|--|---|-------------|--|---|-------------|

**Title:** Comparative Multidimensional Molecular Analyses of Pediatric Diffuse Intrinsic Pontine Glioma Reveals Distinct Molecular Subtypes  
**Journal:** Acta Neuropathologica

**Corresponding Author:**

Javad Nazarian, Children's National Medical Center, Center for Genetic Medicine  
111 Michigan Ave., NW, Washington DC, 20010



File: ISM\_10 (Online Resource 10)

Title: Comparative Multidimensional Molecular Analyses of Pediatric Diffuse Intrinsic Glioma Reveals Distinct Molecular Subtypes  
Journal: Acta Neuro-pathologica

Authors: Amanda M. Stransik, Madhuri Kumbhakar, Kendall Snyder, Sidicki Yavuzli, Joe Devenney, Brennan Harmon, Jordan Hall, Eric H. Rubie, Ping An, Melanie Weingart, Brian Ross, Sarah Magee, Roger J. Packer, Javad Nazarian

Corresponding Author:

Javad Nazarian, Children's National Medical Center, Center for Genetic Medicine

111 Michigan Ave., NW, Washington DC, 20010

Phone: 202-476-6022 Fax: 202-476-6014

Email: J.Nazarian@CNMC.org

| Gene ID | P | FolChang106 |  |  | P | FolChang110 |  |  | P | FolChang111 |  |  | P | FolChang112 |  |  | P | FolChang121 |  |  | P | FolChang137 |  |  | P | FolChang153 |  |  | P | FolChang155 |  |  | P | FolChang156 |  |  | P | FolChang157 |  |  | P | FolChang158 |  |  | P | FolChang159 |  |  | P | FolChang160 |  |  | P | FolChang161 |  |  | P | FolChang162 |  |  | P | FolChang163 |  |  | P | FolChang164 |  |  | P | FolChang165 |  |  | P | FolChang166 |  |  | P | FolChang167 |  |  | P | FolChang168 |  |  | P | FolChang169 |  |  | P | FolChang170 |  |  | P | FolChang171 |  |  | P | FolChang172 |  |  | P | FolChang173 |  |  | P | FolChang174 |  |  | P | FolChang175 |  |  | P | FolChang176 |  |  | P | FolChang177 |  |  | P | FolChang178 |  |  | P | FolChang179 |  |  | P | FolChang180 |  |  | P | FolChang181 |  |  | P | FolChang182 |  |  | P | FolChang183 |  |  | P | FolChang184 |  |  | P | FolChang185 |  |  | P | FolChang186 |  |  | P | FolChang187 |  |  | P | FolChang188 |  |  | P | FolChang189 |  |  | P | FolChang190 |  |  | P | FolChang191 |  |  | P | FolChang192 |  |  | P | FolChang193 |  |  | P | FolChang194 |  |  | P | FolChang195 |  |  | P | FolChang196 |  |  | P | FolChang197 |  |  | P | FolChang198 |  |  | P | FolChang199 |  |  | P | FolChang200 |  |  | P | FolChang201 |  |  | P | FolChang202 |  |  | P | FolChang203 |  |  | P | FolChang204 |  |  | P | FolChang205 |  |  | P | FolChang206 |  |  | P | FolChang207 |  |  | P | FolChang208 |  |  | P | FolChang209 |  |  | P | FolChang210 |  |  | P | FolChang211 |  |  | P | FolChang212 |  |  | P | FolChang213 |  |  | P | FolChang214 |  |  | P | FolChang215 |  |  | P | FolChang216 |  |  | P | FolChang217 |  |  | P | FolChang218 |  |  | P | FolChang219 |  |  | P | FolChang220 |  |  | P | FolChang221 |  |  | P | FolChang222 |  |  | P | FolChang223 |  |  | P | FolChang224 |  |  | P | FolChang225 |  |  | P | FolChang226 |  |  | P | FolChang227 |  |  | P | FolChang228 |  |  | P | FolChang229 |  |  | P | FolChang230 |  |  | P | FolChang231 |  |  | P | FolChang232 |  |  | P | FolChang233 |  |  | P | FolChang234 |  |  | P | FolChang235 |  |  | P | FolChang236 |  |  | P | FolChang237 |  |  | P | FolChang238 |  |  | P | FolChang239 |  |  | P | FolChang240 |  |  | P | FolChang241 |  |  | P | FolChang242 |  |  | P | FolChang243 |  |  | P | FolChang244 |  |  | P | FolChang245 |  |  | P | FolChang246 |  |  | P | FolChang247 |  |  | P | FolChang248 |  |  | P | FolChang249 |  |  | P | FolChang250 |  |  | P | FolChang251 |  |  | P | FolChang252 |  |  | P | FolChang253 |  |  | P | FolChang254 |  |  | P | FolChang255 |  |  | P | FolChang256 |  |  | P | FolChang257 |  |  | P | FolChang258 |  |  | P | FolChang259 |  |  | P | FolChang260 |  |  | P | FolChang261 |  |  | P | FolChang262 |  |  | P | FolChang263 |  |  | P | FolChang264 |  |  | P | FolChang265 |  |  | P | FolChang266 |  |  | P | FolChang267 |  |  | P | FolChang268 |  |  | P | FolChang269 |  |  | P | FolChang270 |  |  | P | FolChang271 |  |  | P | FolChang272 |  |  | P | FolChang273 |  |  | P | FolChang274 |  |  | P | FolChang275 |  |  | P | FolChang276 |  |  | P | FolChang277 |  |  | P | FolChang278 |  |  | P | FolChang279 |  |  | P | FolChang280 |  |  | P | FolChang281 |  |  | P | FolChang282 |  |  | P | FolChang283 |  |  | P | FolChang284 |  |  | P | FolChang285 |  |  | P | FolChang286 |  |  | P | FolChang287 |  |  | P | FolChang288 |  |  | P | FolChang289 |  |  | P | FolChang290 |  |  | P | FolChang291 |  |  | P | FolChang292 |  |  | P | FolChang293 |  |  | P | FolChang294 |  |  | P | FolChang295 |  |  | P | FolChang296 |  |  | P | FolChang297 |  |  | P | FolChang298 |  |  | P | FolChang299 |  |  | P | FolChang300 |  |  | P | FolChang301 |  |  | P | FolChang302 |  |  | P | FolChang303 |  |  | P | FolChang304 |  |  | P | FolChang305 |  |  | P | FolChang306 |  |  | P | FolChang307 |  |  | P | FolChang308 |  |  | P | FolChang309 |  |  | P | FolChang310 |  |  | P | FolChang311 |  |  | P | FolChang312 |  |  | P | FolChang313 |  |  | P | FolChang314 |  |  | P | FolChang315 |  |  | P | FolChang316 |  |  | P | FolChang317 |  |  | P | FolChang318 |  |  | P | FolChang319 |  |  | P | FolChang320 |  |  | P | FolChang321 |  |  | P | FolChang322 |  |  | P | FolChang323 |  |  | P | FolChang324 |  |  | P | FolChang325 |  |  | P | FolChang326 |  |  | P | FolChang327 |  |  | P | FolChang328 |  |  | P | FolChang329 |  |  | P | FolChang330 |  |  | P | FolChang331 |  |  | P | FolChang332 |  |  | P | FolChang333 |  |  | P | FolChang334 |  |  | P | FolChang335 |  |  | P | FolChang336 |  |  | P | FolChang337 |  |  | P | FolChang338 |  |  | P | FolChang339 |  |  | P | FolChang340 |  |  | P | FolChang341 |  |  | P | FolChang342 |  |  | P | FolChang343 |  |  | P | FolChang344 |  |  | P | FolChang345 |  |  | P | FolChang346 |  |  | P | FolChang347 |  |  | P | FolChang348 |  |  | P | FolChang349 |  |  | P | FolChang350 |  |  | P | FolChang351 |  |  | P | FolChang352 |  |  | P | FolChang353 |  |  | P | FolChang354 |  |  | P | FolChang355 |  |  | P | FolChang356 |  |  | P | FolChang357 |  |  | P | FolChang358 |  |  | P | FolChang359 |  |  | P | FolChang360 |  |  | P | FolChang361 |  |  | P | FolChang362 |  |  | P | FolChang363 |  |  | P | FolChang364 |  |  | P | FolChang365 |  |  | P | FolChang366 |  |  | P | FolChang367 |  |  | P |
|---------|---|-------------|--|--|---|-------------|--|--|---|-------------|--|--|---|-------------|--|--|---|-------------|--|--|---|-------------|--|--|---|-------------|--|--|---|-------------|--|--|---|-------------|--|--|---|-------------|--|--|---|-------------|--|--|---|-------------|--|--|---|-------------|--|--|---|-------------|--|--|---|-------------|--|--|---|-------------|--|--|---|-------------|--|--|---|-------------|--|--|---|-------------|--|--|---|-------------|--|--|---|-------------|--|--|---|-------------|--|--|---|-------------|--|--|---|-------------|--|--|---|-------------|--|--|---|-------------|--|--|---|-------------|--|--|---|-------------|--|--|---|-------------|--|--|---|-------------|--|--|---|-------------|--|--|---|-------------|--|--|---|-------------|--|--|---|-------------|--|--|---|-------------|--|--|---|-------------|--|--|---|-------------|--|--|---|-------------|--|--|---|-------------|--|--|---|-------------|--|--|---|-------------|--|--|---|-------------|--|--|---|-------------|--|--|---|-------------|--|--|---|-------------|--|--|---|-------------|--|--|---|-------------|--|--|---|-------------|--|--|---|-------------|--|--|---|-------------|--|--|---|-------------|--|--|---|-------------|--|--|---|-------------|--|--|---|-------------|--|--|---|-------------|--|--|---|-------------|--|--|---|-------------|--|--|---|-------------|--|--|---|-------------|--|--|---|-------------|--|--|---|-------------|--|--|---|-------------|--|--|---|-------------|--|--|---|-------------|--|--|---|-------------|--|--|---|-------------|--|--|---|-------------|--|--|---|-------------|--|--|---|-------------|--|--|---|-------------|--|--|---|-------------|--|--|---|-------------|--|--|---|-------------|--|--|---|-------------|--|--|---|-------------|--|--|---|-------------|--|--|---|-------------|--|--|---|-------------|--|--|---|-------------|--|--|---|-------------|--|--|---|-------------|--|--|---|-------------|--|--|---|-------------|--|--|---|-------------|--|--|---|-------------|--|--|---|-------------|--|--|---|-------------|--|--|---|-------------|--|--|---|-------------|--|--|---|-------------|--|--|---|-------------|--|--|---|-------------|--|--|---|-------------|--|--|---|-------------|--|--|---|-------------|--|--|---|-------------|--|--|---|-------------|--|--|---|-------------|--|--|---|-------------|--|--|---|-------------|--|--|---|-------------|--|--|---|-------------|--|--|---|-------------|--|--|---|-------------|--|--|---|-------------|--|--|---|-------------|--|--|---|-------------|--|--|---|-------------|--|--|---|-------------|--|--|---|-------------|--|--|---|-------------|--|--|---|-------------|--|--|---|-------------|--|--|---|-------------|--|--|---|-------------|--|--|---|-------------|--|--|---|-------------|--|--|---|-------------|--|--|---|-------------|--|--|---|-------------|--|--|---|-------------|--|--|---|-------------|--|--|---|-------------|--|--|---|-------------|--|--|---|-------------|--|--|---|-------------|--|--|---|-------------|--|--|---|-------------|--|--|---|-------------|--|--|---|-------------|--|--|---|-------------|--|--|---|-------------|--|--|---|-------------|--|--|---|-------------|--|--|---|-------------|--|--|---|-------------|--|--|---|-------------|--|--|---|-------------|--|--|---|-------------|--|--|---|-------------|--|--|---|-------------|--|--|---|-------------|--|--|---|-------------|--|--|---|-------------|--|--|---|-------------|--|--|---|-------------|--|--|---|-------------|--|--|---|-------------|--|--|---|-------------|--|--|---|-------------|--|--|---|-------------|--|--|---|-------------|--|--|---|-------------|--|--|---|-------------|--|--|---|-------------|--|--|---|-------------|--|--|---|-------------|--|--|---|-------------|--|--|---|-------------|--|--|---|-------------|--|--|---|-------------|--|--|---|-------------|--|--|---|-------------|--|--|---|-------------|--|--|---|-------------|--|--|---|-------------|--|--|---|-------------|--|--|---|-------------|--|--|---|-------------|--|--|---|-------------|--|--|---|-------------|--|--|---|-------------|--|--|---|-------------|--|--|---|-------------|--|--|---|-------------|--|--|---|-------------|--|--|---|-------------|--|--|---|-------------|--|--|---|-------------|--|--|---|-------------|--|--|---|-------------|--|--|---|-------------|--|--|---|-------------|--|--|---|-------------|--|--|---|-------------|--|--|---|-------------|--|--|---|-------------|--|--|---|-------------|--|--|---|-------------|--|--|---|-------------|--|--|---|-------------|--|--|---|-------------|--|--|---|-------------|--|--|---|-------------|--|--|---|-------------|--|--|---|-------------|--|--|---|-------------|--|--|---|-------------|--|--|---|-------------|--|--|---|-------------|--|--|---|-------------|--|--|---|-------------|--|--|---|-------------|--|--|---|-------------|--|--|---|-------------|--|--|---|-------------|--|--|---|-------------|--|--|---|-------------|--|--|---|-------------|--|--|---|-------------|--|--|---|-------------|--|--|---|-------------|--|--|---|-------------|--|--|---|-------------|--|--|---|-------------|--|--|---|-------------|--|--|---|-------------|--|--|---|-------------|--|--|---|-------------|--|--|---|-------------|--|--|---|
|---------|---|-------------|--|--|---|-------------|--|--|---|-------------|--|--|---|-------------|--|--|---|-------------|--|--|---|-------------|--|--|---|-------------|--|--|---|-------------|--|--|---|-------------|--|--|---|-------------|--|--|---|-------------|--|--|---|-------------|--|--|---|-------------|--|--|---|-------------|--|--|---|-------------|--|--|---|-------------|--|--|---|-------------|--|--|---|-------------|--|--|---|-------------|--|--|---|-------------|--|--|---|-------------|--|--|---|-------------|--|--|---|-------------|--|--|---|-------------|--|--|---|-------------|--|--|---|-------------|--|--|---|-------------|--|--|---|-------------|--|--|---|-------------|--|--|---|-------------|--|--|---|-------------|--|--|---|-------------|--|--|---|-------------|--|--|---|-------------|--|--|---|-------------|--|--|---|-------------|--|--|---|-------------|--|--|---|-------------|--|--|---|-------------|--|--|---|-------------|--|--|---|-------------|--|--|---|-------------|--|--|---|-------------|--|--|---|-------------|--|--|---|-------------|--|--|---|-------------|--|--|---|-------------|--|--|---|-------------|--|--|---|-------------|--|--|---|-------------|--|--|---|-------------|--|--|---|-------------|--|--|---|-------------|--|--|---|-------------|--|--|---|-------------|--|--|---|-------------|--|--|---|-------------|--|--|---|-------------|--|--|---|-------------|--|--|---|-------------|--|--|---|-------------|--|--|---|-------------|--|--|---|-------------|--|--|---|-------------|--|--|---|-------------|--|--|---|-------------|--|--|---|-------------|--|--|---|-------------|--|--|---|-------------|--|--|---|-------------|--|--|---|-------------|--|--|---|-------------|--|--|---|-------------|--|--|---|-------------|--|--|---|-------------|--|--|---|-------------|--|--|---|-------------|--|--|---|-------------|--|--|---|-------------|--|--|---|-------------|--|--|---|-------------|--|--|---|-------------|--|--|---|-------------|--|--|---|-------------|--|--|---|-------------|--|--|---|-------------|--|--|---|-------------|--|--|---|-------------|--|--|---|-------------|--|--|---|-------------|--|--|---|-------------|--|--|---|-------------|--|--|---|-------------|--|--|---|-------------|--|--|---|-------------|--|--|---|-------------|--|--|---|-------------|--|--|---|-------------|--|--|---|-------------|--|--|---|-------------|--|--|---|-------------|--|--|---|-------------|--|--|---|-------------|--|--|---|-------------|--|--|---|-------------|--|--|---|-------------|--|--|---|-------------|--|--|---|-------------|--|--|---|-------------|--|--|---|-------------|--|--|---|-------------|--|--|---|-------------|--|--|---|-------------|--|--|---|-------------|--|--|---|-------------|--|--|---|-------------|--|--|---|-------------|--|--|---|-------------|--|--|---|-------------|--|--|---|-------------|--|--|---|-------------|--|--|---|-------------|--|--|---|-------------|--|--|---|-------------|--|--|---|-------------|--|--|---|-------------|--|--|---|-------------|--|--|---|-------------|--|--|---|-------------|--|--|---|-------------|--|--|---|-------------|--|--|---|-------------|--|--|---|-------------|--|--|---|-------------|--|--|---|-------------|--|--|---|-------------|--|--|---|-------------|--|--|---|-------------|--|--|---|-------------|--|--|---|-------------|--|--|---|-------------|--|--|---|-------------|--|--|---|-------------|--|--|---|-------------|--|--|---|-------------|--|--|---|-------------|--|--|---|-------------|--|--|---|-------------|--|--|---|-------------|--|--|---|-------------|--|--|---|-------------|--|--|---|-------------|--|--|---|-------------|--|--|---|-------------|--|--|---|-------------|--|--|---|-------------|--|--|---|-------------|--|--|---|-------------|--|--|---|-------------|--|--|---|-------------|--|--|---|-------------|--|--|---|-------------|--|--|---|-------------|--|--|---|-------------|--|--|---|-------------|--|--|---|-------------|--|--|---|-------------|--|--|---|-------------|--|--|---|-------------|--|--|---|-------------|--|--|---|-------------|--|--|---|-------------|--|--|---|-------------|--|--|---|-------------|--|--|---|-------------|--|--|---|-------------|--|--|---|-------------|--|--|---|-------------|--|--|---|-------------|--|--|---|-------------|--|--|---|-------------|--|--|---|-------------|--|--|---|-------------|--|--|---|-------------|--|--|---|-------------|--|--|---|-------------|--|--|---|-------------|--|--|---|-------------|--|--|---|-------------|--|--|---|-------------|--|--|---|-------------|--|--|---|-------------|--|--|---|-------------|--|--|---|-------------|--|--|---|-------------|--|--|---|-------------|--|--|---|-------------|--|--|---|-------------|--|--|---|-------------|--|--|---|-------------|--|--|---|-------------|--|--|---|-------------|--|--|---|-------------|--|--|---|-------------|--|--|---|-------------|--|--|---|-------------|--|--|---|-------------|--|--|---|-------------|--|--|---|-------------|--|--|---|-------------|--|--|---|-------------|--|--|---|-------------|--|--|---|-------------|--|--|---|-------------|--|--|---|-------------|--|--|---|-------------|--|--|---|-------------|--|--|---|-------------|--|--|---|-------------|--|--|---|-------------|--|--|---|



**Title:** Comparative Multidimensional Molecular Analyses of Pediatric Diffuse Intrinsic Pontine Glioma Reveals Distinct Molecular Subtypes  
**Journal:** Acta Neuropathologica

**Corresponding Author:**  
Frank J. Marshall, CHU Health, National Multiple Sclerosis Center for Genetic Medicine

Javad Nazarian, Children's National Medical Center, Center for Genetic Medicine  
111 Michigan Ave., NW, Washington DC, 20010  
Tel: 202-476-6020, Fax: 202-476-6014

p-  
 FoldChange[10 p-  
 FoldChange[111 p-





**File:** ESM\_10 (Online Resource) **Figure:** Comparative Multidimensional Molecular Analyses of Pediatric Diffuse Intrinsic Gliomas Reveals Distinct Molecular Subtypes

**Authors:** Amanda M. Stransky, Madhuri Kumbhakar, Kendall Snyder, Sidick J. Yavuz, Joe Devenney, Brennan Harmon, Jordan Hall, Eric H. Rubie, Ping An, Melanie Weingart, Brian Reid, Sarah Magee, Roger J. Packer, Javad Nazarian

**Corresponding Author:**

Javad Nazarian, Children's National Medical Center, Center for Genetic Medicine  
111 Michigan Ave., NW, Washington DC, 20010  
Phone: 202-476-6022 Fax: 202-476-6014  
Email: J.Nazarian@CNMC.org

| Gene ID | P-Value | FolChang106 |  | FolChang107 |  | FolChang108 |  | FolChang109 |  | FolChang110 |  | FolChang111 |  | FolChang112 |  | FolChang113 |  | FolChang114 |  | FolChang115 |  | FolChang116 |  | FolChang117 |  | FolChang118 |  | FolChang119 |  | FolChang120 |  | FolChang121 |  | FolChang122 |  | FolChang123 |  | FolChang124 |  | FolChang125 |  | FolChang126 |  | FolChang127 |  | FolChang128 |  | FolChang129 |  | FolChang130 |  | FolChang131 |  | FolChang132 |  | FolChang133 |  | FolChang134 |  | FolChang135 |  | FolChang136 |  | FolChang137 |  | FolChang138 |  | FolChang139 |  | FolChang140 |  | FolChang141 |  | FolChang142 |  | FolChang143 |  | FolChang144 |  | FolChang145 |  | FolChang146 |  | FolChang147 |  | FolChang148 |  | FolChang149 |  | FolChang150 |  | FolChang151 |  | FolChang152 |  | FolChang153 |  | FolChang154 |  | FolChang155 |  | FolChang156 |  | FolChang157 |  | FolChang158 |  | FolChang159 |  | FolChang160 |  | FolChang161 |  | FolChang162 |  | FolChang163 |  | FolChang164 |  | FolChang165 |  | FolChang166 |  | FolChang167 |  | FolChang168 |  | FolChang169 |  | FolChang170 |  | FolChang171 |  | FolChang172 |  | FolChang173 |  | FolChang174 |  | FolChang175 |  | FolChang176 |  | FolChang177 |  | FolChang178 |  | FolChang179 |  | FolChang180 |  | FolChang181 |  | FolChang182 |  | FolChang183 |  | FolChang184 |  | FolChang185 |  | FolChang186 |  | FolChang187 |  | FolChang188 |  | FolChang189 |  | FolChang190 |  | FolChang191 |  | FolChang192 |  | FolChang193 |  | FolChang194 |  | FolChang195 |  | FolChang196 |  | FolChang197 |  | FolChang198 |  | FolChang199 |  | FolChang200 |  | FolChang201 |  | FolChang202 |  | FolChang203 |  | FolChang204 |  | FolChang205 |  | FolChang206 |  | FolChang207 |  | FolChang208 |  | FolChang209 |  | FolChang210 |  | FolChang211 |  | FolChang212 |  | FolChang213 |  | FolChang214 |  | FolChang215 |  | FolChang216 |  | FolChang217 |  | FolChang218 |  | FolChang219 |  | FolChang220 |  | FolChang221 |  | FolChang222 |  | FolChang223 |  | FolChang224 |  | FolChang225 |  | FolChang226 |  | FolChang227 |  | FolChang228 |  | FolChang229 |  | FolChang230 |  | FolChang231 |  | FolChang232 |  | FolChang233 |  | FolChang234 |  | FolChang235 |  | FolChang236 |  | FolChang237 |  | FolChang238 |  | FolChang239 |  | FolChang240 |  | FolChang241 |  | FolChang242 |  | FolChang243 |  | FolChang244 |  | FolChang245 |  | FolChang246 |  | FolChang247 |  | FolChang248 |  | FolChang249 |  | FolChang250 |  | FolChang251 |  | FolChang252 |  | FolChang253 |  | FolChang254 |  | FolChang255 |  | FolChang256 |  | FolChang257 |  | FolChang258 |  | FolChang259 |  | FolChang260 |  | FolChang261 |  | FolChang262 |  | FolChang263 |  | FolChang264 |  | FolChang265 |  | FolChang266 |  | FolChang267 |  | FolChang268 |  | FolChang269 |  | FolChang270 |  | FolChang271 |  | FolChang272 |  | FolChang273 |  | FolChang274 |  | FolChang275 |  | FolChang276 |  | FolChang277 |  | FolChang278 |  | FolChang279 |  | FolChang280 |  | FolChang281 |  | FolChang282 |  | FolChang283 |  | FolChang284 |  | FolChang285 |  | FolChang286 |  | FolChang287 |  | FolChang288 |  | FolChang289 |  | FolChang290 |  | FolChang291 |  | FolChang292 |  | FolChang293 |  | FolChang294 |  | FolChang295 |  | FolChang296 |  | FolChang297 |  | FolChang298 |  | FolChang299 |  | FolChang300 |  | FolChang301 |  | FolChang302 |  | FolChang303 |  | FolChang304 |  | FolChang305 |  | FolChang306 |  | FolChang307 |  | FolChang308 |  | FolChang309 |  | FolChang310 |  | FolChang311 |  | FolChang312 |  | FolChang313 |  | FolChang314 |  | FolChang315 |  | FolChang316 |  | FolChang317 |  | FolChang318 |  | FolChang319 |  | FolChang320 |  | FolChang321 |  | FolChang322 |  | FolChang323 |  | FolChang324 |  | FolChang325 |  | FolChang326 |  | FolChang327 |  | FolChang328 |  | FolChang329 |  | FolChang330 |  | FolChang331 |  | FolChang332 |  | FolChang333 |  | FolChang334 |  | FolChang335 |  | FolChang336 |  | FolChang337 |  | FolChang338 |  | FolChang339 |  | FolChang340 |  | FolChang341 |  | FolChang342 |  | FolChang343 |  | FolChang344 |  | FolChang345 |  | FolChang346 |  | FolChang347 |  | FolChang348 |  | FolChang349 |  | FolChang350 |  | FolChang351 |  | FolChang352 |  | FolChang353 |  | FolChang354 |  | FolChang355 |  | FolChang356 |  | FolChang357 |  | FolChang358 |  | FolChang359 |  | FolChang360 |  | FolChang361 |  | FolChang362 |  | FolChang363 |  | FolChang364 |  | FolChang365 |  | FolChang366 |  | FolChang367 |  | FolChang368 |  | FolChang369 |  | FolChang370 |  | FolChang371 |  | FolChang372 |  | FolChang373 |  | FolChang374 |  | FolChang375 |  | FolChang376 |  | FolChang377 |  | FolChang378 |  | FolChang379 |  | FolChang380 |  | FolChang381 |  | FolChang382 |  | FolChang383 |  | FolChang384 |  | FolChang385 |  | FolChang386 |  | FolChang387 |  | FolChang388 |  | FolChang389 |  | FolChang390 |  | FolChang391 |  | FolChang392 |  | FolChang393 |  | FolChang394 |  | FolChang395 |  | FolChang396 |  | FolChang397 |  | FolChang398 |  | FolChang399 |  | FolChang400 |  | FolChang401 |  | FolChang402 |  | FolChang403 |  | FolChang404 |  | FolChang405 |  | FolChang406 |  | FolChang407 |  | FolChang408 |  | FolChang409 |  | FolChang410 |  | FolChang411 |  | FolChang412 |  | FolChang413 |  | FolChang414 |  | FolChang415 |  | FolChang416 |  | FolChang417 |  | FolChang418 |  | FolChang419 |  | FolChang420 |  | FolChang421 |  | FolChang422 |  | FolChang423 |  | FolChang424 |  | FolChang425 |  | FolChang426 |  | FolChang427 |  | FolChang428 |  | FolChang429 |  | FolChang430 |  | FolChang431 |  | FolChang432 |  | FolChang433 |  | FolChang434 |  | FolChang435 |  | FolChang436 |  | FolChang437 |  | FolChang438 |  | FolChang439 |  | FolChang440 |  | FolChang441 |  | FolChang442 |  | FolChang443 |  | FolChang444 |  | FolChang445 |  | FolChang446 |  | FolChang447 |  | FolChang448 |  | FolChang449 |  | FolChang450 |  | FolChang451 |  | FolChang452 |  | FolChang453 |  | FolChang454 |  | FolChang455 |  | FolChang456 |  | FolChang457 |  | FolChang458 |  | FolChang459 |  | FolChang460 |  | FolChang461 |  | FolChang462 |  | FolChang463 |  | FolChang464 |  | FolChang465 |  | FolChang466 |  | FolChang467 |  | FolChang468 |  | FolChang469 |  | FolChang470 |  | FolChang471 |  | FolChang472 |  | FolChang473 |  | FolChang474 |  | FolChang475 |  | FolChang476 |  | FolChang477 |  | FolChang478 |  | FolChang479 |  | FolChang480 |  | FolChang481 |  | FolChang482 |  | FolChang483 |  | FolChang484 |  | FolChang485 |  | FolChang486 |  | FolChang487 |  | FolChang488 |  | FolChang489 |  | FolChang490 |  | FolChang491 |  | FolChang492 |  | FolChang493 |  | FolChang494 |  | FolChang495 |  | FolChang496 |  | FolChang497 |  | FolChang498 |  | FolChang499 |  | FolChang500 |  | FolChang501 |  | FolChang502 |  | FolChang503 |  | FolChang504 |  | FolChang505 |
|---------|---------|-------------|--|-------------|--|-------------|--|-------------|--|-------------|--|-------------|--|-------------|--|-------------|--|-------------|--|-------------|--|-------------|--|-------------|--|-------------|--|-------------|--|-------------|--|-------------|--|-------------|--|-------------|--|-------------|--|-------------|--|-------------|--|-------------|--|-------------|--|-------------|--|-------------|--|-------------|--|-------------|--|-------------|--|-------------|--|-------------|--|-------------|--|-------------|--|-------------|--|-------------|--|-------------|--|-------------|--|-------------|--|-------------|--|-------------|--|-------------|--|-------------|--|-------------|--|-------------|--|-------------|--|-------------|--|-------------|--|-------------|--|-------------|--|-------------|--|-------------|--|-------------|--|-------------|--|-------------|--|-------------|--|-------------|--|-------------|--|-------------|--|-------------|--|-------------|--|-------------|--|-------------|--|-------------|--|-------------|--|-------------|--|-------------|--|-------------|--|-------------|--|-------------|--|-------------|--|-------------|--|-------------|--|-------------|--|-------------|--|-------------|--|-------------|--|-------------|--|-------------|--|-------------|--|-------------|--|-------------|--|-------------|--|-------------|--|-------------|--|-------------|--|-------------|--|-------------|--|-------------|--|-------------|--|-------------|--|-------------|--|-------------|--|-------------|--|-------------|--|-------------|--|-------------|--|-------------|--|-------------|--|-------------|--|-------------|--|-------------|--|-------------|--|-------------|--|-------------|--|-------------|--|-------------|--|-------------|--|-------------|--|-------------|--|-------------|--|-------------|--|-------------|--|-------------|--|-------------|--|-------------|--|-------------|--|-------------|--|-------------|--|-------------|--|-------------|--|-------------|--|-------------|--|-------------|--|-------------|--|-------------|--|-------------|--|-------------|--|-------------|--|-------------|--|-------------|--|-------------|--|-------------|--|-------------|--|-------------|--|-------------|--|-------------|--|-------------|--|-------------|--|-------------|--|-------------|--|-------------|--|-------------|--|-------------|--|-------------|--|-------------|--|-------------|--|-------------|--|-------------|--|-------------|--|-------------|--|-------------|--|-------------|--|-------------|--|-------------|--|-------------|--|-------------|--|-------------|--|-------------|--|-------------|--|-------------|--|-------------|--|-------------|--|-------------|--|-------------|--|-------------|--|-------------|--|-------------|--|-------------|--|-------------|--|-------------|--|-------------|--|-------------|--|-------------|--|-------------|--|-------------|--|-------------|--|-------------|--|-------------|--|-------------|--|-------------|--|-------------|--|-------------|--|-------------|--|-------------|--|-------------|--|-------------|--|-------------|--|-------------|--|-------------|--|-------------|--|-------------|--|-------------|--|-------------|--|-------------|--|-------------|--|-------------|--|-------------|--|-------------|--|-------------|--|-------------|--|-------------|--|-------------|--|-------------|--|-------------|--|-------------|--|-------------|--|-------------|--|-------------|--|-------------|--|-------------|--|-------------|--|-------------|--|-------------|--|-------------|--|-------------|--|-------------|--|-------------|--|-------------|--|-------------|--|-------------|--|-------------|--|-------------|--|-------------|--|-------------|--|-------------|--|-------------|--|-------------|--|-------------|--|-------------|--|-------------|--|-------------|--|-------------|--|-------------|--|-------------|--|-------------|--|-------------|--|-------------|--|-------------|--|-------------|--|-------------|--|-------------|--|-------------|--|-------------|--|-------------|--|-------------|--|-------------|--|-------------|--|-------------|--|-------------|--|-------------|--|-------------|--|-------------|--|-------------|--|-------------|--|-------------|--|-------------|--|-------------|--|-------------|--|-------------|--|-------------|--|-------------|--|-------------|--|-------------|--|-------------|--|-------------|--|-------------|--|-------------|--|-------------|--|-------------|--|-------------|--|-------------|--|-------------|--|-------------|--|-------------|--|-------------|--|-------------|--|-------------|--|-------------|--|-------------|--|-------------|--|-------------|--|-------------|--|-------------|--|-------------|--|-------------|--|-------------|--|-------------|--|-------------|--|-------------|--|-------------|--|-------------|--|-------------|--|-------------|--|-------------|--|-------------|--|-------------|--|-------------|--|-------------|--|-------------|--|-------------|--|-------------|--|-------------|--|-------------|--|-------------|--|-------------|--|-------------|--|-------------|--|-------------|--|-------------|--|-------------|--|-------------|--|-------------|--|-------------|--|-------------|--|-------------|--|-------------|--|-------------|--|-------------|--|-------------|--|-------------|--|-------------|--|-------------|--|-------------|--|-------------|--|-------------|--|-------------|--|-------------|--|-------------|--|-------------|--|-------------|--|-------------|--|-------------|--|-------------|--|-------------|--|-------------|--|-------------|--|-------------|--|-------------|--|-------------|--|-------------|--|-------------|--|-------------|--|-------------|--|-------------|--|-------------|--|-------------|--|-------------|--|-------------|--|-------------|--|-------------|--|-------------|--|-------------|--|-------------|--|-------------|--|-------------|--|-------------|--|-------------|--|-------------|--|-------------|--|-------------|--|-------------|--|-------------|--|-------------|--|-------------|--|-------------|--|-------------|--|-------------|--|-------------|--|-------------|--|-------------|--|-------------|--|-------------|--|-------------|--|-------------|--|-------------|--|-------------|--|-------------|--|-------------|--|-------------|--|-------------|--|-------------|--|-------------|--|-------------|--|-------------|--|-------------|--|-------------|--|-------------|--|-------------|--|-------------|--|-------------|--|-------------|--|-------------|--|-------------|--|-------------|--|-------------|--|-------------|--|-------------|--|-------------|--|-------------|--|-------------|--|-------------|
|---------|---------|-------------|--|-------------|--|-------------|--|-------------|--|-------------|--|-------------|--|-------------|--|-------------|--|-------------|--|-------------|--|-------------|--|-------------|--|-------------|--|-------------|--|-------------|--|-------------|--|-------------|--|-------------|--|-------------|--|-------------|--|-------------|--|-------------|--|-------------|--|-------------|--|-------------|--|-------------|--|-------------|--|-------------|--|-------------|--|-------------|--|-------------|--|-------------|--|-------------|--|-------------|--|-------------|--|-------------|--|-------------|--|-------------|--|-------------|--|-------------|--|-------------|--|-------------|--|-------------|--|-------------|--|-------------|--|-------------|--|-------------|--|-------------|--|-------------|--|-------------|--|-------------|--|-------------|--|-------------|--|-------------|--|-------------|--|-------------|--|-------------|--|-------------|--|-------------|--|-------------|--|-------------|--|-------------|--|-------------|--|-------------|--|-------------|--|-------------|--|-------------|--|-------------|--|-------------|--|-------------|--|-------------|--|-------------|--|-------------|--|-------------|--|-------------|--|-------------|--|-------------|--|-------------|--|-------------|--|-------------|--|-------------|--|-------------|--|-------------|--|-------------|--|-------------|--|-------------|--|-------------|--|-------------|--|-------------|--|-------------|--|-------------|--|-------------|--|-------------|--|-------------|--|-------------|--|-------------|--|-------------|--|-------------|--|-------------|--|-------------|--|-------------|--|-------------|--|-------------|--|-------------|--|-------------|--|-------------|--|-------------|--|-------------|--|-------------|--|-------------|--|-------------|--|-------------|--|-------------|--|-------------|--|-------------|--|-------------|--|-------------|--|-------------|--|-------------|--|-------------|--|-------------|--|-------------|--|-------------|--|-------------|--|-------------|--|-------------|--|-------------|--|-------------|--|-------------|--|-------------|--|-------------|--|-------------|--|-------------|--|-------------|--|-------------|--|-------------|--|-------------|--|-------------|--|-------------|--|-------------|--|-------------|--|-------------|--|-------------|--|-------------|--|-------------|--|-------------|--|-------------|--|-------------|--|-------------|--|-------------|--|-------------|--|-------------|--|-------------|--|-------------|--|-------------|--|-------------|--|-------------|--|-------------|--|-------------|--|-------------|--|-------------|--|-------------|--|-------------|--|-------------|--|-------------|--|-------------|--|-------------|--|-------------|--|-------------|--|-------------|--|-------------|--|-------------|--|-------------|--|-------------|--|-------------|--|-------------|--|-------------|--|-------------|--|-------------|--|-------------|--|-------------|--|-------------|--|-------------|--|-------------|--|-------------|--|-------------|--|-------------|--|-------------|--|-------------|--|-------------|--|-------------|--|-------------|--|-------------|--|-------------|--|-------------|--|-------------|--|-------------|--|-------------|--|-------------|--|-------------|--|-------------|--|-------------|--|-------------|--|-------------|--|-------------|--|-------------|--|-------------|--|-------------|--|-------------|--|-------------|--|-------------|--|-------------|--|-------------|--|-------------|--|-------------|--|-------------|--|-------------|--|-------------|--|-------------|--|-------------|--|-------------|--|-------------|--|-------------|--|-------------|--|-------------|--|-------------|--|-------------|--|-------------|--|-------------|--|-------------|--|-------------|--|-------------|--|-------------|--|-------------|--|-------------|--|-------------|--|-------------|--|-------------|--|-------------|--|-------------|--|-------------|--|-------------|--|-------------|--|-------------|--|-------------|--|-------------|--|-------------|--|-------------|--|-------------|--|-------------|--|-------------|--|-------------|--|-------------|--|-------------|--|-------------|--|-------------|--|-------------|--|-------------|--|-------------|--|-------------|--|-------------|--|-------------|--|-------------|--|-------------|--|-------------|--|-------------|--|-------------|--|-------------|--|-------------|--|-------------|--|-------------|--|-------------|--|-------------|--|-------------|--|-------------|--|-------------|--|-------------|--|-------------|--|-------------|--|-------------|--|-------------|--|-------------|--|-------------|--|-------------|--|-------------|--|-------------|--|-------------|--|-------------|--|-------------|--|-------------|--|-------------|--|-------------|--|-------------|--|-------------|--|-------------|--|-------------|--|-------------|--|-------------|--|-------------|--|-------------|--|-------------|--|-------------|--|-------------|--|-------------|--|-------------|--|-------------|--|-------------|--|-------------|--|-------------|--|-------------|--|-------------|--|-------------|--|-------------|--|-------------|--|-------------|--|-------------|--|-------------|--|-------------|--|-------------|--|-------------|--|-------------|--|-------------|--|-------------|--|-------------|--|-------------|--|-------------|--|-------------|--|-------------|--|-------------|--|-------------|--|-------------|--|-------------|--|-------------|--|-------------|--|-------------|--|-------------|--|-------------|--|-------------|--|-------------|--|-------------|--|-------------|--|-------------|--|-------------|--|-------------|--|-------------|--|-------------|--|-------------|--|-------------|--|-------------|--|-------------|--|-------------|--|-------------|--|-------------|--|-------------|--|-------------|--|-------------|--|-------------|--|-------------|--|-------------|--|-------------|--|-------------|--|-------------|--|-------------|--|-------------|--|-------------|--|-------------|--|-------------|--|-------------|--|-------------|--|-------------|--|-------------|--|-------------|--|-------------|--|-------------|--|-------------|--|-------------|--|-------------|--|-------------|--|-------------|--|-------------|--|-------------|--|-------------|--|-------------|--|-------------|--|-------------|--|-------------|--|-------------|--|-------------|--|-------------|--|-------------|--|-------------|--|-------------|--|-------------|--|-------------|--|-------------|--|-------------|--|-------------|--|-------------|--|-------------|--|-------------|

File: ESM\_10 (Online Resource 10)

Figure: Comparative Multidimensional Molecular Analyses of Pediatric Diffuse Intrinsic Glioma Reveals Distinct Molecular Subtypes  
Journal: Acta Neuropathologica

Authors: Amanda M. Sznarski, Madhuri Kumbhakar, Kendall Snyder, Sidexi Yavuz, Joe Devenay, Brennan Harmon, Jordan Hall, Eric H. Rubie, Ping An, Melanie Weingart, Brian Ross, Sarah Mages, Roger J. Packer, Javad Nazarian

Corresponding Author:

Javad Nazarian, Children's National Medical Center, Center for Genetic Medicine  
111 Michigan Ave., NW, Washington DC, 20010  
Phone: 202-476-6022 Fax: 202-476-6014  
Email: J.Nazarian@CNMC.org

| Gene ID | P | FolChang106 |  |  | p | FolChang110 |  |  | p | FolChang111 |  |  | p | FolChang112 |  |  | p | FolChang121 |  |  | p | FolChang137 |  |  | p | FolChang153 |  |  | p | FolChang157 |  |  | p | FolChang166 |  |  | p | FolChang170 |  |  | p | FolChang184 |  |  | p | FolChang193 |  |  | p | FolChang200 |  |  | p | FolChang209 |  |  | p | FolChang216 |  |  | p | FolChang224 |  |  | p | FolChang231 |  |  | p | FolChang238 |  |  | p | FolChang245 |  |  | p | FolChang252 |  |  | p | FolChang259 |  |  | p | FolChang266 |  |  | p | FolChang273 |  |  | p | FolChang280 |  |  | p | FolChang287 |  |  | p | FolChang294 |  |  | p | FolChang301 |  |  | p | FolChang308 |  |  | p | FolChang315 |  |  | p | FolChang322 |  |  | p | FolChang329 |  |  | p | FolChang336 |  |  | p | FolChang343 |  |  | p | FolChang350 |  |  | p | FolChang357 |  |  | p | FolChang364 |  |  | p | FolChang371 |  |  | p | FolChang378 |  |  | p | FolChang385 |  |  | p | FolChang392 |  |  | p | FolChang399 |  |  | p | FolChang406 |  |  | p | FolChang413 |  |  | p | FolChang420 |  |  | p | FolChang427 |  |  | p | FolChang434 |  |  | p | FolChang441 |  |  | p | FolChang448 |  |  | p | FolChang455 |  |  | p | FolChang462 |  |  | p | FolChang469 |  |  | p | FolChang476 |  |  | p | FolChang483 |  |  | p | FolChang490 |  |  | p | FolChang497 |  |  | p | FolChang504 |  |  | p | FolChang511 |  |  | p | FolChang518 |  |  | p | FolChang525 |  |  | p | FolChang532 |  |  | p | FolChang539 |  |  | p | FolChang546 |  |  | p | FolChang553 |  |  | p | FolChang560 |  |  | p | FolChang567 |  |  | p | FolChang574 |  |  | p | FolChang581 |  |  | p | FolChang588 |  |  | p | FolChang595 |  |  | p | FolChang602 |  |  | p | FolChang609 |  |  | p | FolChang616 |  |  | p | FolChang623 |  |  | p | FolChang630 |  |  | p | FolChang637 |  |  | p | FolChang644 |  |  | p | FolChang651 |  |  | p | FolChang658 |  |  | p | FolChang665 |  |  | p | FolChang672 |  |  | p | FolChang679 |  |  | p | FolChang686 |  |  | p | FolChang693 |  |  | p | FolChang700 |  |  | p | FolChang707 |  |  | p | FolChang714 |  |  | p | FolChang721 |  |  | p | FolChang728 |  |  | p | FolChang735 |  |  | p | FolChang742 |  |  | p | FolChang749 |  |  | p | FolChang756 |  |  | p | FolChang763 |  |  | p | FolChang770 |  |  | p | FolChang777 |  |  | p | FolChang784 |  |  | p | FolChang791 |  |  | p | FolChang798 |  |  | p | FolChang805 |  |  | p | FolChang812 |  |  | p | FolChang819 |  |  | p | FolChang826 |  |  | p | FolChang833 |  |  | p | FolChang840 |  |  | p | FolChang847 |  |  | p | FolChang854 |  |  | p | FolChang861 |  |  | p | FolChang868 |  |  | p | FolChang875 |  |  | p | FolChang882 |  |  | p | FolChang889 |  |  | p | FolChang896 |  |  | p | FolChang903 |  |  | p | FolChang910 |  |  | p | FolChang917 |  |  | p | FolChang924 |  |  | p | FolChang931 |  |  | p | FolChang938 |  |  | p | FolChang945 |  |  | p | FolChang952 |  |  | p | FolChang959 |  |  | p | FolChang966 |  |  | p | FolChang973 |  |  | p | FolChang980 |  |  | p | FolChang987 |  |  | p | FolChang994 |  |  | p | FolChang1001 |  |  | p | FolChang1008 |  |  | p | FolChang1015 |  |  | p | FolChang1022 |  |  | p | FolChang1029 |  |  | p | FolChang1036 |  |  | p | FolChang1043 |  |  | p | FolChang1050 |  |  | p | FolChang1057 |  |  | p | FolChang1064 |  |  | p | FolChang1071 |  |  | p | FolChang1078 |  |  | p | FolChang1085 |  |  | p | FolChang1092 |  |  | p | FolChang1099 |  |  | p | FolChang1106 |  |  | p | FolChang1113 |  |  | p | FolChang1120 |  |  | p | FolChang1127 |  |  | p | FolChang1134 |  |  | p | FolChang1141 |  |  | p | FolChang1148 |  |  | p | FolChang1155 |  |  | p | FolChang1162 |  |  | p | FolChang1169 |  |  | p | FolChang1176 |  |  | p | FolChang1183 |  |  | p | FolChang1190 |  |  | p | FolChang1197 |  |  | p | FolChang1204 |  |  | p | FolChang1211 |  |  | p | FolChang1218 |  |  | p | FolChang1225 |  |  | p | FolChang1232 |  |  | p | FolChang1239 |  |  | p | FolChang1246 |  |  | p | FolChang1253 |  |  | p | FolChang1260 |  |  | p | FolChang1267 |  |  | p | FolChang1274 |  |  | p | FolChang1281 |  |  | p | FolChang1288 |  |  | p | FolChang1295 |  |  | p | FolChang1302 |  |  | p | FolChang1309 |  |  | p | FolChang1316 |  |  | p | FolChang1323 |  |  | p | FolChang1330 |  |  | p | FolChang1337 |  |  | p | FolChang1344 |  |  | p | FolChang1351 |  |  | p | FolChang1358 |  |  | p | FolChang1365 |  |  | p | FolChang1372 |  |  | p | FolChang1379 |  |  | p | FolChang1386 |  |  | p | FolChang1393 |  |  | p | FolChang1400 |  |  | p | FolChang1407 |  |  | p | FolChang1414 |  |  | p | FolChang1421 |  |  | p | FolChang1428 |  |  | p | FolChang1435 |  |  | p | FolChang1442 |  |  | p | FolChang1449 |  |  | p | FolChang1456 |  |  | p | FolChang1463 |  |  | p | FolChang1470 |  |  | p | FolChang1477 |  |  | p | FolChang1484 |  |  | p | FolChang1491 |  |  | p | FolChang1498 |  |  | p | FolChang1505 |  |  | p | FolChang1512 |  |  | p | FolChang1519 |  |  | p | FolChang1526 |  |  | p | FolChang1533 |  |  | p | FolChang1540 |  |  | p | FolChang1547 |  |  | p | FolChang1554 |  |  | p | FolChang1561 |  |  | p | FolChang1568 |  |  | p | FolChang1575 |  |  | p | FolChang1582 |  |  | p | FolChang1589 |  |  | p | FolChang1596 |  |  | p | FolChang1603 |  |  | p | FolChang1610 |  |  | p | FolChang1617 |  |  | p | FolChang1624 |  |  | p | FolChang1631 |  |  | p | FolChang1638 |  |  | p | FolChang1645 |  |  | p | FolChang1652 |  |  |
|---------|---|-------------|--|--|---|-------------|--|--|---|-------------|--|--|---|-------------|--|--|---|-------------|--|--|---|-------------|--|--|---|-------------|--|--|---|-------------|--|--|---|-------------|--|--|---|-------------|--|--|---|-------------|--|--|---|-------------|--|--|---|-------------|--|--|---|-------------|--|--|---|-------------|--|--|---|-------------|--|--|---|-------------|--|--|---|-------------|--|--|---|-------------|--|--|---|-------------|--|--|---|-------------|--|--|---|-------------|--|--|---|-------------|--|--|---|-------------|--|--|---|-------------|--|--|---|-------------|--|--|---|-------------|--|--|---|-------------|--|--|---|-------------|--|--|---|-------------|--|--|---|-------------|--|--|---|-------------|--|--|---|-------------|--|--|---|-------------|--|--|---|-------------|--|--|---|-------------|--|--|---|-------------|--|--|---|-------------|--|--|---|-------------|--|--|---|-------------|--|--|---|-------------|--|--|---|-------------|--|--|---|-------------|--|--|---|-------------|--|--|---|-------------|--|--|---|-------------|--|--|---|-------------|--|--|---|-------------|--|--|---|-------------|--|--|---|-------------|--|--|---|-------------|--|--|---|-------------|--|--|---|-------------|--|--|---|-------------|--|--|---|-------------|--|--|---|-------------|--|--|---|-------------|--|--|---|-------------|--|--|---|-------------|--|--|---|-------------|--|--|---|-------------|--|--|---|-------------|--|--|---|-------------|--|--|---|-------------|--|--|---|-------------|--|--|---|-------------|--|--|---|-------------|--|--|---|-------------|--|--|---|-------------|--|--|---|-------------|--|--|---|-------------|--|--|---|-------------|--|--|---|-------------|--|--|---|-------------|--|--|---|-------------|--|--|---|-------------|--|--|---|-------------|--|--|---|-------------|--|--|---|-------------|--|--|---|-------------|--|--|---|-------------|--|--|---|-------------|--|--|---|-------------|--|--|---|-------------|--|--|---|-------------|--|--|---|-------------|--|--|---|-------------|--|--|---|-------------|--|--|---|-------------|--|--|---|-------------|--|--|---|-------------|--|--|---|-------------|--|--|---|-------------|--|--|---|-------------|--|--|---|-------------|--|--|---|-------------|--|--|---|-------------|--|--|---|-------------|--|--|---|-------------|--|--|---|-------------|--|--|---|-------------|--|--|---|-------------|--|--|---|-------------|--|--|---|-------------|--|--|---|-------------|--|--|---|-------------|--|--|---|-------------|--|--|---|-------------|--|--|---|-------------|--|--|---|-------------|--|--|---|-------------|--|--|---|-------------|--|--|---|-------------|--|--|---|-------------|--|--|---|-------------|--|--|---|-------------|--|--|---|-------------|--|--|---|-------------|--|--|---|-------------|--|--|---|-------------|--|--|---|-------------|--|--|---|-------------|--|--|---|-------------|--|--|---|-------------|--|--|---|-------------|--|--|---|-------------|--|--|---|--------------|--|--|---|--------------|--|--|---|--------------|--|--|---|--------------|--|--|---|--------------|--|--|---|--------------|--|--|---|--------------|--|--|---|--------------|--|--|---|--------------|--|--|---|--------------|--|--|---|--------------|--|--|---|--------------|--|--|---|--------------|--|--|---|--------------|--|--|---|--------------|--|--|---|--------------|--|--|---|--------------|--|--|---|--------------|--|--|---|--------------|--|--|---|--------------|--|--|---|--------------|--|--|---|--------------|--|--|---|--------------|--|--|---|--------------|--|--|---|--------------|--|--|---|--------------|--|--|---|--------------|--|--|---|--------------|--|--|---|--------------|--|--|---|--------------|--|--|---|--------------|--|--|---|--------------|--|--|---|--------------|--|--|---|--------------|--|--|---|--------------|--|--|---|--------------|--|--|---|--------------|--|--|---|--------------|--|--|---|--------------|--|--|---|--------------|--|--|---|--------------|--|--|---|--------------|--|--|---|--------------|--|--|---|--------------|--|--|---|--------------|--|--|---|--------------|--|--|---|--------------|--|--|---|--------------|--|--|---|--------------|--|--|---|--------------|--|--|---|--------------|--|--|---|--------------|--|--|---|--------------|--|--|---|--------------|--|--|---|--------------|--|--|---|--------------|--|--|---|--------------|--|--|---|--------------|--|--|---|--------------|--|--|---|--------------|--|--|---|--------------|--|--|---|--------------|--|--|---|--------------|--|--|---|--------------|--|--|---|--------------|--|--|---|--------------|--|--|---|--------------|--|--|---|--------------|--|--|---|--------------|--|--|---|--------------|--|--|---|--------------|--|--|---|--------------|--|--|---|--------------|--|--|---|--------------|--|--|---|--------------|--|--|---|--------------|--|--|---|--------------|--|--|---|--------------|--|--|---|--------------|--|--|---|--------------|--|--|---|--------------|--|--|---|--------------|--|--|---|--------------|--|--|---|--------------|--|--|---|--------------|--|--|---|--------------|--|--|---|--------------|--|--|---|--------------|--|--|---|--------------|--|--|---|--------------|--|--|---|--------------|--|--|---|--------------|--|--|---|--------------|--|--|---|--------------|--|--|
|---------|---|-------------|--|--|---|-------------|--|--|---|-------------|--|--|---|-------------|--|--|---|-------------|--|--|---|-------------|--|--|---|-------------|--|--|---|-------------|--|--|---|-------------|--|--|---|-------------|--|--|---|-------------|--|--|---|-------------|--|--|---|-------------|--|--|---|-------------|--|--|---|-------------|--|--|---|-------------|--|--|---|-------------|--|--|---|-------------|--|--|---|-------------|--|--|---|-------------|--|--|---|-------------|--|--|---|-------------|--|--|---|-------------|--|--|---|-------------|--|--|---|-------------|--|--|---|-------------|--|--|---|-------------|--|--|---|-------------|--|--|---|-------------|--|--|---|-------------|--|--|---|-------------|--|--|---|-------------|--|--|---|-------------|--|--|---|-------------|--|--|---|-------------|--|--|---|-------------|--|--|---|-------------|--|--|---|-------------|--|--|---|-------------|--|--|---|-------------|--|--|---|-------------|--|--|---|-------------|--|--|---|-------------|--|--|---|-------------|--|--|---|-------------|--|--|---|-------------|--|--|---|-------------|--|--|---|-------------|--|--|---|-------------|--|--|---|-------------|--|--|---|-------------|--|--|---|-------------|--|--|---|-------------|--|--|---|-------------|--|--|---|-------------|--|--|---|-------------|--|--|---|-------------|--|--|---|-------------|--|--|---|-------------|--|--|---|-------------|--|--|---|-------------|--|--|---|-------------|--|--|---|-------------|--|--|---|-------------|--|--|---|-------------|--|--|---|-------------|--|--|---|-------------|--|--|---|-------------|--|--|---|-------------|--|--|---|-------------|--|--|---|-------------|--|--|---|-------------|--|--|---|-------------|--|--|---|-------------|--|--|---|-------------|--|--|---|-------------|--|--|---|-------------|--|--|---|-------------|--|--|---|-------------|--|--|---|-------------|--|--|---|-------------|--|--|---|-------------|--|--|---|-------------|--|--|---|-------------|--|--|---|-------------|--|--|---|-------------|--|--|---|-------------|--|--|---|-------------|--|--|---|-------------|--|--|---|-------------|--|--|---|-------------|--|--|---|-------------|--|--|---|-------------|--|--|---|-------------|--|--|---|-------------|--|--|---|-------------|--|--|---|-------------|--|--|---|-------------|--|--|---|-------------|--|--|---|-------------|--|--|---|-------------|--|--|---|-------------|--|--|---|-------------|--|--|---|-------------|--|--|---|-------------|--|--|---|-------------|--|--|---|-------------|--|--|---|-------------|--|--|---|-------------|--|--|---|-------------|--|--|---|-------------|--|--|---|-------------|--|--|---|-------------|--|--|---|-------------|--|--|---|-------------|--|--|---|-------------|--|--|---|-------------|--|--|---|-------------|--|--|---|-------------|--|--|---|-------------|--|--|---|-------------|--|--|---|-------------|--|--|---|-------------|--|--|---|-------------|--|--|---|-------------|--|--|---|-------------|--|--|---|--------------|--|--|---|--------------|--|--|---|--------------|--|--|---|--------------|--|--|---|--------------|--|--|---|--------------|--|--|---|--------------|--|--|---|--------------|--|--|---|--------------|--|--|---|--------------|--|--|---|--------------|--|--|---|--------------|--|--|---|--------------|--|--|---|--------------|--|--|---|--------------|--|--|---|--------------|--|--|---|--------------|--|--|---|--------------|--|--|---|--------------|--|--|---|--------------|--|--|---|--------------|--|--|---|--------------|--|--|---|--------------|--|--|---|--------------|--|--|---|--------------|--|--|---|--------------|--|--|---|--------------|--|--|---|--------------|--|--|---|--------------|--|--|---|--------------|--|--|---|--------------|--|--|---|--------------|--|--|---|--------------|--|--|---|--------------|--|--|---|--------------|--|--|---|--------------|--|--|---|--------------|--|--|---|--------------|--|--|---|--------------|--|--|---|--------------|--|--|---|--------------|--|--|---|--------------|--|--|---|--------------|--|--|---|--------------|--|--|---|--------------|--|--|---|--------------|--|--|---|--------------|--|--|---|--------------|--|--|---|--------------|--|--|---|--------------|--|--|---|--------------|--|--|---|--------------|--|--|---|--------------|--|--|---|--------------|--|--|---|--------------|--|--|---|--------------|--|--|---|--------------|--|--|---|--------------|--|--|---|--------------|--|--|---|--------------|--|--|---|--------------|--|--|---|--------------|--|--|---|--------------|--|--|---|--------------|--|--|---|--------------|--|--|---|--------------|--|--|---|--------------|--|--|---|--------------|--|--|---|--------------|--|--|---|--------------|--|--|---|--------------|--|--|---|--------------|--|--|---|--------------|--|--|---|--------------|--|--|---|--------------|--|--|---|--------------|--|--|---|--------------|--|--|---|--------------|--|--|---|--------------|--|--|---|--------------|--|--|---|--------------|--|--|---|--------------|--|--|---|--------------|--|--|---|--------------|--|--|---|--------------|--|--|---|--------------|--|--|---|--------------|--|--|---|--------------|--|--|---|--------------|--|--|---|--------------|--|--|---|--------------|--|--|---|--------------|--|--|---|--------------|--|--|---|--------------|--|--|

File: ESM\_10 (Online Resource 10)

Title: Comparing Multidimensional Molecular Analyses of Pediatric Diffuse Intrinsic Tumors: Gene Gloms Reveals Distinct Molecular Subtypes

Journal: Acta Neuropathologica

Authors: Amanda M. Stransik, Madhuri Kumbhakar, Kendall Snyder, Sidicki Yavuz, Joe Devenney,

Brennan Harmon, Jordan Hall, Eric H. Ruabe, Ping An, Melanie Weingart, Brian Reid, Sarah Magee, Roger J. Packer, Javad Nazarian

Corresponding Author:

Javad Nazarian, Children's National Medical Center, Center for Genetic Medicine

111 Michigan Ave., NW, Washington DC, 20010

DOI: 2024.076.0014

Email: J.Nazarian@CNMC.org

| Gene ID | P-value | FolChang106 |  | P-value | FolChang107 |  | P-value | FolChang108 |  | P-value | FolChang109 |  | P-value | FolChang110 |  | P-value | FolChang111 |  | P-value | FolChang112 |  | P-value | FolChang113 |  | P-value | FolChang114 |  | P-value | FolChang115 |  | P-value | FolChang116 |  | P-value | FolChang117 |  | P-value | FolChang118 |  | P-value | FolChang119 |  | P-value | FolChang120 |  | P-value | FolChang121 |  | P-value | FolChang122 |  | P-value | FolChang123 |  | P-value | FolChang124 |  | P-value | FolChang125 |  | P-value | FolChang126 |  | P-value | FolChang127 |  | P-value | FolChang128 |  | P-value | FolChang129 |  | P-value | FolChang130 |  | P-value | FolChang131 |  | P-value | FolChang132 |  | P-value | FolChang133 |  | P-value | FolChang134 |  | P-value | FolChang135 |  | P-value | FolChang136 |  | P-value | FolChang137 |  | P-value | FolChang138 |  | P-value | FolChang139 |  | P-value | FolChang140 |  | P-value | FolChang141 |  | P-value | FolChang142 |  | P-value | FolChang143 |  | P-value | FolChang144 |  | P-value | FolChang145 |  | P-value | FolChang146 |  | P-value | FolChang147 |  | P-value | FolChang148 |  | P-value | FolChang149 |  | P-value | FolChang150 |  | P-value | FolChang151 |  | P-value | FolChang152 |  | P-value | FolChang153 |  | P-value | FolChang154 |  | P-value | FolChang155 |  | P-value | FolChang156 |  | P-value | FolChang157 |  | P-value | FolChang158 |  | P-value | FolChang159 |  | P-value | FolChang160 |  | P-value | FolChang161 |  | P-value | FolChang162 |  | P-value | FolChang163 |  | P-value | FolChang164 |  | P-value | FolChang165 |  | P-value | FolChang166 |  | P-value | FolChang167 |  | P-value | FolChang168 |  | P-value | FolChang169 |  | P-value | FolChang170 |  | P-value | FolChang171 |  | P-value | FolChang172 |  | P-value | FolChang173 |  | P-value | FolChang174 |  | P-value | FolChang175 |  | P-value | FolChang176 |  | P-value | FolChang177 |  | P-value | FolChang178 |  | P-value | FolChang179 |  | P-value | FolChang180 |  | P-value | FolChang181 |  | P-value | FolChang182 |  | P-value | FolChang183 |  | P-value | FolChang184 |  | P-value | FolChang185 |  | P-value | FolChang186 |  | P-value | FolChang187 |  | P-value | FolChang188 |  | P-value | FolChang189 |  | P-value | FolChang190 |  | P-value | FolChang191 |  | P-value | FolChang192 |  | P-value | FolChang193 |  | P-value | FolChang194 |  | P-value | FolChang195 |  | P-value | FolChang196 |  | P-value | FolChang197 |  | P-value | FolChang198 |  | P-value | FolChang199 |  | P-value | FolChang200 |  | P-value | FolChang201 |  | P-value | FolChang202 |  | P-value | FolChang203 |  | P-value | FolChang204 |  | P-value | FolChang205 |  | P-value | FolChang206 |  | P-value | FolChang207 |  | P-value | FolChang208 |  | P-value | FolChang209 |  | P-value | FolChang210 |  | P-value | FolChang211 |  | P-value | FolChang212 |  | P-value | FolChang213 |  | P-value | FolChang214 |  | P-value | FolChang215 |  | P-value | FolChang216 |  | P-value | FolChang217 |  | P-value | FolChang218 |  | P-value | FolChang219 |  | P-value | FolChang220 |  | P-value | FolChang221 |  | P-value | FolChang222 |  | P-value | FolChang223 |  | P-value | FolChang224 |  | P-value | FolChang225 |  | P-value | FolChang226 |  | P-value | FolChang227 |  | P-value | FolChang228 |  | P-value | FolChang229 |  | P-value | FolChang230 |  | P-value | FolChang231 |  | P-value | FolChang232 |  | P-value | FolChang233 |  | P-value | FolChang234 |  | P-value | FolChang235 |  | P-value | FolChang236 |  | P-value | FolChang237 |  | P-value | FolChang238 |  | P-value | FolChang239 |  | P-value | FolChang240 |  | P-value | FolChang241 |  | P-value | FolChang242 |  | P-value | FolChang243 |  | P-value | FolChang244 |  | P-value | FolChang245 |  | P-value | FolChang246 |  | P-value | FolChang247 |  | P-value | FolChang248 |  | P-value | FolChang249 |  | P-value | FolChang250 |  | P-value | FolChang251 |  | P-value | FolChang252 |  | P-value | FolChang253 |  | P-value | FolChang254 |  | P-value | FolChang255 |  | P-value | FolChang256 |  | P-value | FolChang257 |  | P-value | FolChang258 |  | P-value | FolChang259 |  | P-value | FolChang260 |  | P-value | FolChang261 |  | P-value | FolChang262 |  | P-value | FolChang263 |  | P-value | FolChang264 |  | P-value | FolChang265 |  | P-value | FolChang266 |  | P-value | FolChang267 |  | P-value | FolChang268 |  | P-value | FolChang269 |  | P-value | FolChang270 |  | P-value | FolChang271 |  | P-value | FolChang272 |  | P-value | FolChang273 |  | P-value | FolChang274 |  | P-value | FolChang275 |  | P-value | FolChang276 |  | P-value | FolChang277 |  | P-value | FolChang278 |  | P-value | FolChang279 |  | P-value | FolChang280 |  | P-value | FolChang281 |  | P-value | FolChang282 |  | P-value | FolChang283 |  | P-value | FolChang284 |  | P-value | FolChang285 |  | P-value | FolChang286 |  | P-value | FolChang287 |  | P-value | FolChang288 |  | P-value | FolChang289 |  | P-value | FolChang290 |  | P-value | FolChang291 |  | P-value | FolChang292 |  | P-value | FolChang293 |  | P-value | FolChang294 |  | P-value | FolChang295 |  | P-value | FolChang296 |  | P-value | FolChang297 |  | P-value | FolChang298 |  | P-value | FolChang299 |  | P-value | FolChang300 |  | P-value | FolChang301 |  | P-value | FolChang302 |  | P-value | FolChang303 |  | P-value | FolChang304 |  | P-value | FolChang305 |  | P-value | FolChang306 |  | P-value | FolChang307 |  | P-value | FolChang308 |  | P-value | FolChang309 |  | P-value | FolChang310 |  | P-value | FolChang311 |  | P-value | FolChang312 |  | P-value | FolChang313 |  | P-value | FolChang314 |  | P-value | FolChang315 |  | P-value | FolChang316 |  | P-value | FolChang317 |  | P-value | FolChang318 |  | P-value | FolChang319 |  | P-value | FolChang320 |  | P-value | FolChang321 |  | P-value | FolChang322 |  | P-value | FolChang323 |  | P-value | FolChang324 |  | P-value | FolChang325 |  | P-value | FolChang326 |  | P-value | FolChang327 |  | P-value | FolChang328 |  | P-value | FolChang329 |  | P-value | FolChang330 |  | P-value | FolChang331 |  | P-value | FolChang332 |  | P-value | FolChang333 |  | P-value | FolChang334 |  | P-value | FolChang335 |  | P-value | FolChang336 |  | P-value | FolChang337 |  | P-value | FolChang338 |  | P-value | FolChang339 |  | P-value | FolChang340 |  | P-value | FolChang341 |  | P-value | FolChang342 |  | P-value | FolChang343 |  | P-value | FolChang344 |  | P-value | FolChang345 |  | P-value | FolChang346 |  | P-value | FolChang347 |  | P-value | FolChang348 |  | P-value | FolChang349 |  | P-value | FolChang350 |  | P-value | FolChang351 |  | P-value | FolChang352 |  | P-value | FolChang353 |  | P-value | FolChang354 |  | P-value | FolChang355 |  | P-value | FolChang356 |  | P-value | FolChang357 |  |
|---------|---------|-------------|--|---------|-------------|--|---------|-------------|--|---------|-------------|--|---------|-------------|--|---------|-------------|--|---------|-------------|--|---------|-------------|--|---------|-------------|--|---------|-------------|--|---------|-------------|--|---------|-------------|--|---------|-------------|--|---------|-------------|--|---------|-------------|--|---------|-------------|--|---------|-------------|--|---------|-------------|--|---------|-------------|--|---------|-------------|--|---------|-------------|--|---------|-------------|--|---------|-------------|--|---------|-------------|--|---------|-------------|--|---------|-------------|--|---------|-------------|--|---------|-------------|--|---------|-------------|--|---------|-------------|--|---------|-------------|--|---------|-------------|--|---------|-------------|--|---------|-------------|--|---------|-------------|--|---------|-------------|--|---------|-------------|--|---------|-------------|--|---------|-------------|--|---------|-------------|--|---------|-------------|--|---------|-------------|--|---------|-------------|--|---------|-------------|--|---------|-------------|--|---------|-------------|--|---------|-------------|--|---------|-------------|--|---------|-------------|--|---------|-------------|--|---------|-------------|--|---------|-------------|--|---------|-------------|--|---------|-------------|--|---------|-------------|--|---------|-------------|--|---------|-------------|--|---------|-------------|--|---------|-------------|--|---------|-------------|--|---------|-------------|--|---------|-------------|--|---------|-------------|--|---------|-------------|--|---------|-------------|--|---------|-------------|--|---------|-------------|--|---------|-------------|--|---------|-------------|--|---------|-------------|--|---------|-------------|--|---------|-------------|--|---------|-------------|--|---------|-------------|--|---------|-------------|--|---------|-------------|--|---------|-------------|--|---------|-------------|--|---------|-------------|--|---------|-------------|--|---------|-------------|--|---------|-------------|--|---------|-------------|--|---------|-------------|--|---------|-------------|--|---------|-------------|--|---------|-------------|--|---------|-------------|--|---------|-------------|--|---------|-------------|--|---------|-------------|--|---------|-------------|--|---------|-------------|--|---------|-------------|--|---------|-------------|--|---------|-------------|--|---------|-------------|--|---------|-------------|--|---------|-------------|--|---------|-------------|--|---------|-------------|--|---------|-------------|--|---------|-------------|--|---------|-------------|--|---------|-------------|--|---------|-------------|--|---------|-------------|--|---------|-------------|--|---------|-------------|--|---------|-------------|--|---------|-------------|--|---------|-------------|--|---------|-------------|--|---------|-------------|--|---------|-------------|--|---------|-------------|--|---------|-------------|--|---------|-------------|--|---------|-------------|--|---------|-------------|--|---------|-------------|--|---------|-------------|--|---------|-------------|--|---------|-------------|--|---------|-------------|--|---------|-------------|--|---------|-------------|--|---------|-------------|--|---------|-------------|--|---------|-------------|--|---------|-------------|--|---------|-------------|--|---------|-------------|--|---------|-------------|--|---------|-------------|--|---------|-------------|--|---------|-------------|--|---------|-------------|--|---------|-------------|--|---------|-------------|--|---------|-------------|--|---------|-------------|--|---------|-------------|--|---------|-------------|--|---------|-------------|--|---------|-------------|--|---------|-------------|--|---------|-------------|--|---------|-------------|--|---------|-------------|--|---------|-------------|--|---------|-------------|--|---------|-------------|--|---------|-------------|--|---------|-------------|--|---------|-------------|--|---------|-------------|--|---------|-------------|--|---------|-------------|--|---------|-------------|--|---------|-------------|--|---------|-------------|--|---------|-------------|--|---------|-------------|--|---------|-------------|--|---------|-------------|--|---------|-------------|--|---------|-------------|--|---------|-------------|--|---------|-------------|--|---------|-------------|--|---------|-------------|--|---------|-------------|--|---------|-------------|--|---------|-------------|--|---------|-------------|--|---------|-------------|--|---------|-------------|--|---------|-------------|--|---------|-------------|--|---------|-------------|--|---------|-------------|--|---------|-------------|--|---------|-------------|--|---------|-------------|--|---------|-------------|--|---------|-------------|--|---------|-------------|--|---------|-------------|--|---------|-------------|--|---------|-------------|--|---------|-------------|--|---------|-------------|--|---------|-------------|--|---------|-------------|--|---------|-------------|--|---------|-------------|--|---------|-------------|--|---------|-------------|--|---------|-------------|--|---------|-------------|--|---------|-------------|--|---------|-------------|--|---------|-------------|--|---------|-------------|--|---------|-------------|--|---------|-------------|--|---------|-------------|--|---------|-------------|--|---------|-------------|--|---------|-------------|--|---------|-------------|--|---------|-------------|--|---------|-------------|--|---------|-------------|--|---------|-------------|--|---------|-------------|--|---------|-------------|--|---------|-------------|--|---------|-------------|--|---------|-------------|--|---------|-------------|--|---------|-------------|--|---------|-------------|--|---------|-------------|--|---------|-------------|--|---------|-------------|--|---------|-------------|--|---------|-------------|--|---------|-------------|--|---------|-------------|--|---------|-------------|--|---------|-------------|--|---------|-------------|--|---------|-------------|--|---------|-------------|--|---------|-------------|--|---------|-------------|--|---------|-------------|--|---------|-------------|--|---------|-------------|--|---------|-------------|--|---------|-------------|--|---------|-------------|--|---------|-------------|--|---------|-------------|--|---------|-------------|--|---------|-------------|--|---------|-------------|--|---------|-------------|--|---------|-------------|--|---------|-------------|--|
|---------|---------|-------------|--|---------|-------------|--|---------|-------------|--|---------|-------------|--|---------|-------------|--|---------|-------------|--|---------|-------------|--|---------|-------------|--|---------|-------------|--|---------|-------------|--|---------|-------------|--|---------|-------------|--|---------|-------------|--|---------|-------------|--|---------|-------------|--|---------|-------------|--|---------|-------------|--|---------|-------------|--|---------|-------------|--|---------|-------------|--|---------|-------------|--|---------|-------------|--|---------|-------------|--|---------|-------------|--|---------|-------------|--|---------|-------------|--|---------|-------------|--|---------|-------------|--|---------|-------------|--|---------|-------------|--|---------|-------------|--|---------|-------------|--|---------|-------------|--|---------|-------------|--|---------|-------------|--|---------|-------------|--|---------|-------------|--|---------|-------------|--|---------|-------------|--|---------|-------------|--|---------|-------------|--|---------|-------------|--|---------|-------------|--|---------|-------------|--|---------|-------------|--|---------|-------------|--|---------|-------------|--|---------|-------------|--|---------|-------------|--|---------|-------------|--|---------|-------------|--|---------|-------------|--|---------|-------------|--|---------|-------------|--|---------|-------------|--|---------|-------------|--|---------|-------------|--|---------|-------------|--|---------|-------------|--|---------|-------------|--|---------|-------------|--|---------|-------------|--|---------|-------------|--|---------|-------------|--|---------|-------------|--|---------|-------------|--|---------|-------------|--|---------|-------------|--|---------|-------------|--|---------|-------------|--|---------|-------------|--|---------|-------------|--|---------|-------------|--|---------|-------------|--|---------|-------------|--|---------|-------------|--|---------|-------------|--|---------|-------------|--|---------|-------------|--|---------|-------------|--|---------|-------------|--|---------|-------------|--|---------|-------------|--|---------|-------------|--|---------|-------------|--|---------|-------------|--|---------|-------------|--|---------|-------------|--|---------|-------------|--|---------|-------------|--|---------|-------------|--|---------|-------------|--|---------|-------------|--|---------|-------------|--|---------|-------------|--|---------|-------------|--|---------|-------------|--|---------|-------------|--|---------|-------------|--|---------|-------------|--|---------|-------------|--|---------|-------------|--|---------|-------------|--|---------|-------------|--|---------|-------------|--|---------|-------------|--|---------|-------------|--|---------|-------------|--|---------|-------------|--|---------|-------------|--|---------|-------------|--|---------|-------------|--|---------|-------------|--|---------|-------------|--|---------|-------------|--|---------|-------------|--|---------|-------------|--|---------|-------------|--|---------|-------------|--|---------|-------------|--|---------|-------------|--|---------|-------------|--|---------|-------------|--|---------|-------------|--|---------|-------------|--|---------|-------------|--|---------|-------------|--|---------|-------------|--|---------|-------------|--|---------|-------------|--|---------|-------------|--|---------|-------------|--|---------|-------------|--|---------|-------------|--|---------|-------------|--|---------|-------------|--|---------|-------------|--|---------|-------------|--|---------|-------------|--|---------|-------------|--|---------|-------------|--|---------|-------------|--|---------|-------------|--|---------|-------------|--|---------|-------------|--|---------|-------------|--|---------|-------------|--|---------|-------------|--|---------|-------------|--|---------|-------------|--|---------|-------------|--|---------|-------------|--|---------|-------------|--|---------|-------------|--|---------|-------------|--|---------|-------------|--|---------|-------------|--|---------|-------------|--|---------|-------------|--|---------|-------------|--|---------|-------------|--|---------|-------------|--|---------|-------------|--|---------|-------------|--|---------|-------------|--|---------|-------------|--|---------|-------------|--|---------|-------------|--|---------|-------------|--|---------|-------------|--|---------|-------------|--|---------|-------------|--|---------|-------------|--|---------|-------------|--|---------|-------------|--|---------|-------------|--|---------|-------------|--|---------|-------------|--|---------|-------------|--|---------|-------------|--|---------|-------------|--|---------|-------------|--|---------|-------------|--|---------|-------------|--|---------|-------------|--|---------|-------------|--|---------|-------------|--|---------|-------------|--|---------|-------------|--|---------|-------------|--|---------|-------------|--|---------|-------------|--|---------|-------------|--|---------|-------------|--|---------|-------------|--|---------|-------------|--|---------|-------------|--|---------|-------------|--|---------|-------------|--|---------|-------------|--|---------|-------------|--|---------|-------------|--|---------|-------------|--|---------|-------------|--|---------|-------------|--|---------|-------------|--|---------|-------------|--|---------|-------------|--|---------|-------------|--|---------|-------------|--|---------|-------------|--|---------|-------------|--|---------|-------------|--|---------|-------------|--|---------|-------------|--|---------|-------------|--|---------|-------------|--|---------|-------------|--|---------|-------------|--|---------|-------------|--|---------|-------------|--|---------|-------------|--|---------|-------------|--|---------|-------------|--|---------|-------------|--|---------|-------------|--|---------|-------------|--|---------|-------------|--|---------|-------------|--|---------|-------------|--|---------|-------------|--|---------|-------------|--|---------|-------------|--|---------|-------------|--|---------|-------------|--|---------|-------------|--|---------|-------------|--|---------|-------------|--|---------|-------------|--|---------|-------------|--|---------|-------------|--|---------|-------------|--|---------|-------------|--|---------|-------------|--|---------|-------------|--|---------|-------------|--|---------|-------------|--|---------|-------------|--|---------|-------------|--|---------|-------------|--|---------|-------------|--|---------|-------------|--|

File: ESM\_10 (On-line Release 10)

Title: Comparative Multidimensional Molecular Analyses of Pediatric Diffuse Intrinsic Glioma Reveals Distinct Molecular Subtypes  
Journal: Acta Neuro-pathologica

Authors: Amanda M. Stransik, Mahesh Kumarbhat, Kendall Snyder, Sidney Yustine, Joe Devenney,  
Brennan Harmon, Jordan Hall, Eric H. Rubie, Ping An, Melanie Weingart, Brian Reid, Sarah Magee, Roger J. Packer, Javad Nazarian

Corresponding Author:

Javad Nazarian, Children's National Medical Center, Center for Genetic Medicine  
111 Michigan Ave., NW, Washington DC, 20010  
Tel: 202-476-0021 Fax: 202-476-6014  
Email: J.Nazarian@CNMC.org

| Gene ID | p-<br>value[106] | MeanRatio<br>(106 vs. n) | FoldChange[106] | p-<br>value[111] | MeanRatio<br>(111 vs. n) | FoldChange[111] | p-<br>value[112] | MeanRatio<br>(112 vs. n) | FoldChange[112] | p-<br>value[121] | MeanRatio<br>(121 vs. n) | FoldChange[121] | p-<br>value[137] | MeanRatio<br>(137 vs. n) | FoldChange[137] | p-<br>value[153] | MeanRatio<br>(153 vs. n) | FoldChange[153] | p-<br>value[157] | MeanRatio<br>(157 vs. n) | FoldChange[157] | p-<br>value[165] | MeanRatio<br>(165 vs. n) | FoldChange[165] | p-<br>value[166] | MeanRatio<br>(166 vs. n) | FoldChange[166] | FPRD           | SMPD         | FPRERR       |                |              |         |              |
|---------|------------------|--------------------------|-----------------|------------------|--------------------------|-----------------|------------------|--------------------------|-----------------|------------------|--------------------------|-----------------|------------------|--------------------------|-----------------|------------------|--------------------------|-----------------|------------------|--------------------------|-----------------|------------------|--------------------------|-----------------|------------------|--------------------------|-----------------|----------------|--------------|--------------|----------------|--------------|---------|--------------|
|         |                  |                          |                 |                  |                          |                 |                  |                          |                 |                  |                          |                 |                  |                          |                 |                  |                          |                 |                  |                          |                 |                  |                          |                 |                  |                          |                 |                |              |              |                |              |         |              |
| 13810   | 0                | 1.02394                  | 1.02394         | 106 down vs. n   | 0.846496                 | 1.18134         | 111 down vs. n   | 0.739492                 | 1.15228         | 112 down vs. n   | 1.05328                  | 1.05328         | 121 up vs. n     | 0.13545                  | -7.3828         | 347 down vs. n   | 0.68412                  | -1.46173        | 353 down vs. n   | 0.32619                  | 2.28919         | 537 up vs. n     | 0.32619                  | 2.28919         | 537 up vs. n     | 0.32619                  | 2.28919         | 537 up vs. n   | 0.32619      | 2.28919      | 537 up vs. n   |              |         |              |
| 13811   | 0                | 0.429362                 | -1.23504        | 106 down vs. n   | 2.70785                  | 2.70785         | 111 up vs. n     | 0.888146                 | -1.012          | 112 down vs. n   | 1.3999                   | 1.3999          | 121 up vs. n     | 0.34234                  | -2.9212         | 347 down vs. n   | 1.33822                  | 1.33822         | 353 up vs. n     | 0.71218                  | 1.21283         | 537 up vs. n     | 0.71218                  | 1.21283         | 537 up vs. n     | 0.71218                  | 1.21283         | 537 up vs. n   | 0.71218      | 1.21283      | 537 up vs. n   |              |         |              |
| 13812   | 0                | 0.830477                 | -1.58661        | 106 down vs. n   | 0.943294                 | 1.06011         | 111 down vs. n   | 1.64586                  | 1.64586         | 112 up vs. n     | 0.43955                  | 1.43955         | 121 up vs. n     | 0.13827                  | -0.87302        | 347 down vs. n   | 1.31827                  | 1.31827         | 353 up vs. n     | 0.44736                  | 4.44736         | 537 up vs. n     | 0.44736                  | 4.44736         | 537 up vs. n     | 0.44736                  | 4.44736         | 537 up vs. n   | 0.44736      | 4.44736      | 537 up vs. n   |              |         |              |
| 13813   | 2.80E-45         | 0.682261                 | -1.50998        | 106 down vs. n   | 6.00184                  | 6.00184         | 111 up vs. n     | 1.54555                  | 1.54555         | 112 up vs. n     | 1.58075                  | 1.58075         | 121 up vs. n     | 0.342402                 | -2.92054        | 347 down vs. n   | 2.98136                  | 2.98136         | 353 up vs. n     | 0.727618                 | 7.27618         | 537 up vs. n     | 0.727618                 | 7.27618         | 537 up vs. n     | 0.727618                 | 7.27618         | 537 up vs. n   | 0.727618     | 7.27618      | 537 up vs. n   |              |         |              |
| 13814   | 0                | 0.295235                 | -1.39725        | 106 down vs. n   | 0.57517                  | 1.14264         | 111 down vs. n   | 0.463108                 | 0.463108        | 112 up vs. n     | 0.655392                 | -1.25534        | 121 down vs. n   | 0.895658                 | -1.19109        | 347 down vs. n   | 2.54447                  | 2.54447         | 353 up vs. n     | 0.54447                  | 2.54447         | 537 up vs. n     | 0.54447                  | 2.54447         | 537 up vs. n     | 0.54447                  | 2.54447         | 537 up vs. n   | 0.54447      | 2.54447      | 537 up vs. n   |              |         |              |
| 13815   | 1.40E-45         | -0.116979                | -1.55851        | 106 down vs. n   | -20.4615                 | -1.55098        | 111 down vs. n   | -0.64475                 | -1.55098        | 112 down vs. n   | -0.9368                  | 1.9368          | 121 up vs. n     | -0.274635                | -2.0505         | 347 down vs. n   | -26.0654                 | -1.08817        | 353 down vs. n   | -26.0654                 | -1.08817        | 537 down vs. n   | -26.0654                 | -1.08817        | 537 down vs. n   | -26.0654                 | -1.08817        | 537 down vs. n | -26.0654     | -1.08817     | 537 down vs. n |              |         |              |
| 13816   | 0                | 0.558433                 | -1.79992        | 106 down vs. n   | -1.35377                 | 1.53377         | 111 up vs. n     | 0.0019038                | -52.4005        | 112 down vs. n   | 0.0508212                | -19.7546        | 121 down vs. n   | 0.128219                 | -7.79913        | 347 down vs. n   | -2.48194                 | 2.48194         | 353 up vs. n     | 1.74906                  | 1.74906         | 537 up vs. n     | 1.74906                  | 1.74906         | 537 up vs. n     | 1.74906                  | 1.74906         | 537 up vs. n   | 1.74906      | 1.74906      | 537 up vs. n   |              |         |              |
| 13817   | 0                | 0.600988                 | -1.62033        | 106 down vs. n   | 2.08387                  | 2.08387         | 111 up vs. n     | 2.1527                   | 2.1527          | 112 up vs. n     | 2.1527                   | 2.1527          | 121 up vs. n     | 0.082448                 | -1.13446        | 347 down vs. n   | 0.0271055                | -36.8997        | 353 down vs. n   | -0.024054                | -23.937         | 537 down vs. n   | -0.024054                | -23.937         | 537 down vs. n   | -0.024054                | -23.937         | 537 down vs. n | -0.024054    | -23.937      | 537 down vs. n |              |         |              |
| 13818   | 0                | -1.12244                 | 1.12244         | 106 up vs. n     | 0.194791                 | -1.53337        | 111 down vs. n   | -0.252501                | -1.53337        | 112 down vs. n   | -0.146843                | 1.46843         | 121 down vs. n   | -0.158608                | 2.67816         | 347 down vs. n   | -0.158608                | 2.67816         | 353 up vs. n     | -0.158608                | 2.67816         | 537 down vs. n   | -0.158608                | 2.67816         | 537 down vs. n   | -0.158608                | 2.67816         | 537 down vs. n | -0.158608    | 2.67816      | 537 down vs. n |              |         |              |
| 13819   | 1.40E-45         | 0.72494                  | -1.37943        | 106 down vs. n   | 3.07366                  | 3.07366         | 111 up vs. n     | 7.79882                  | 7.79882         | 112 up vs. n     | 0.436411                 | -2.29037        | 121 down vs. n   | 0.0137571                | -72.7661        | 347 down vs. n   | 0.271863                 | -0.67882        | 353 down vs. n   | 2.83192                  | 2.83192         | 537 up vs. n     | 2.83192                  | 2.83192         | 537 up vs. n     | 2.83192                  | 2.83192         | 537 up vs. n   | 2.83192      | 2.83192      | 537 up vs. n   |              |         |              |
| 13820   | 0                | 0.501781                 | -1.9529         | 106 down vs. n   | -5.7121                  | 1.56721         | 111 up vs. n     | 1.40E-45                 | 0.734255        | -1.9529          | 0.514149                 | -1.09479        | 121 down vs. n   | 0.4718                   | -2.11554        | 347 down vs. n   | 0.150418                 | -6.64816        | 353 down vs. n   | 4.331                    | 4.331           | 537 up vs. n     | 1.04E-41                 | 0.934168        | -1.80205         | 537 down vs. n           | 3.44E+15        | 36.1519        | 1.42E-14     | 1.42E-14     | 1.42E-14       |              |         |              |
| 13821   | 0                | -0.20239                 | -1.54095        | 106 down vs. n   | 3.20625                  | 3.20625         | 111 up vs. n     | 1.83896                  | 1.83896         | 112 up vs. n     | 0.329955                 | 1.03071         | 121 down vs. n   | 1.54873                  | 1.54873         | 347 down vs. n   | 1.54873                  | 1.54873         | 353 up vs. n     | 1.67077                  | 1.67077         | 537 up vs. n     | 1.67077                  | 1.67077         | 537 up vs. n     | 1.67077                  | 1.67077         | 537 up vs. n   | 1.67077      | 1.67077      | 537 up vs. n   |              |         |              |
| 13822   | 0                | -12.3002                 | 12.3002         | 106 up vs. n     | 0.564276                 | -1.77218        | 111 down vs. n   | 1.78388                  | 1.78388         | 112 up vs. n     | 2.0992                   | 2.0992          | 121 up vs. n     | 4.64E-39                 | 1.04488         | 1.04488          | 347 up vs. n             | 0.347372        | -1.60883         | 353 down vs. n           | 4.40E-39        | 1.04522          | 1.04522                  | 537 up vs. n    | 1.04522          | 1.04522                  | 537 up vs. n    | 1.04522        | 1.04522      | 537 up vs. n |                |              |         |              |
| 13823   | 0                | 0.802614                 | -1.35004        | 106 down vs. n   | 1.81363                  | 1.81363         | 111 up vs. n     | 1.17384                  | 1.17384         | 112 up vs. n     | 0.0116107                | -18.7821        | 121 down vs. n   | 0.113329                 | -8.82384        | 347 down vs. n   | 1.06881                  | 1.06881         | 353 up vs. n     | 1.31017                  | 1.31017         | 537 up vs. n     | 1.31017                  | 1.31017         | 537 up vs. n     | 1.31017                  | 1.31017         | 537 up vs. n   | 1.31017      | 1.31017      | 537 up vs. n   |              |         |              |
| 13824   | 0                | 0.109515                 | -0.85152        | 106 down vs. n   | 1.01055                  | -0.85152        | 111 down vs. n   | 1.07474                  | 1.07474         | 112 up vs. n     | 0.743078                 | 1.34413         | 121 down vs. n   | 2.27038                  | 2.27038         | 347 down vs. n   | 2.27038                  | 2.27038         | 353 up vs. n     | 4.77545                  | 4.77545         | 537 up vs. n     | 4.77545                  | 4.77545         | 537 up vs. n     | 4.77545                  | 4.77545         | 537 up vs. n   | 4.77545      | 4.77545      | 537 up vs. n   |              |         |              |
| 13825   | 0                | 0.7464                   | -2.60923        | 106 down vs. n   | -5.18554                 | 5.18554         | 111 up vs. n     | 2.4211                   | 2.4211          | 112 up vs. n     | 1.45309                  | 1.45309         | 121 up vs. n     | -0.144246                | -6.93261        | 347 down vs. n   | 11.2843                  | 1.30493         | 353 up vs. n     | 0.164893                 | 1.60893         | 537 up vs. n     | 0.164893                 | 1.60893         | 537 up vs. n     | 0.164893                 | 1.60893         | 537 up vs. n   | 0.164893     | 1.60893      | 537 up vs. n   |              |         |              |
| 13826   | 0                | 0.257693                 | -1.90957        | 106 down vs. n   | 1.6467                   | 1.6467          | 111 up vs. n     | 1.6321                   | 1.6321          | 112 up vs. n     | 0.460570                 | -2.14728        | 121 down vs. n   | 0.023023                 | -60.6737        | 347 down vs. n   | 0.129439                 | 1.39493         | 353 up vs. n     | 0.164922                 | 4.79434         | 537 down vs. n   | 0.164922                 | 4.79434         | 537 down vs. n   | 0.164922                 | 4.79434         | 537 down vs. n | 0.164922     | 4.79434      | 537 down vs. n |              |         |              |
| 13827   | 0                | 0.136604                 | -0.7087         | 106 down vs. n   | 1.79901                  | -0.7087         | 111 down vs. n   | 1.45E-45                 | 0.494657        | -1.11379         | 0.532327                 | -1.81052        | 121 down vs. n   | 0.173495                 | -5.60781        | 347 down vs. n   | 1.04913                  | 1.04913         | 353 up vs. n     | 0.71917                  | 1.20493         | 537 up vs. n     | 0.71917                  | 1.20493         | 537 up vs. n     | 0.71917                  | 1.20493         | 537 up vs. n   | 0.71917      | 1.20493      | 537 up vs. n   |              |         |              |
| 13828   | 4.63E-42         | 0.306375                 | -27.3932        | 106 down vs. n   | -91.4243                 | 1.91424         | 111 up vs. n     | 0.43333                  | -2.0663         | 112 down vs. n   | 2.08131                  | 2.08131         | 121 up vs. n     | 3.01E-42                 | 0.90489         | 1.90489          | 347 down vs. n           | 1.30E-41        | 1.83134          | 353 up vs. n             | 1.87324         | 1.87324          | 537 up vs. n             | 1.87324         | 1.87324          | 537 up vs. n             | 1.87324         | 1.87324        | 537 up vs. n | 1.87324      | 1.87324        | 537 up vs. n |         |              |
| 13829   | 0                | 0.42454                  | -2.55397        | 106 down vs. n   | -11.4853                 | 11.8853         | 111 up vs. n     | 2.57772                  | 2.57772         | 112 up vs. n     | 2.48796                  | 2.48796         | 121 up vs. n     | 9.37E-42                 | 0.891104        | -1.1222          | 347 down vs. n           | 2.65091         | 2.65091          | 353 up vs. n             | -2.28056        | 2.87056          | 537 up vs. n             | -2.28056        | 2.87056          | 537 up vs. n             | -2.28056        | 2.87056        | 537 up vs. n | -2.28056     | 2.87056        | 537 up vs. n |         |              |
| 13830   | 0                | 0.20645                  | -2.6199         | 106 down vs. n   | 1.39804                  | -2.6199         | 111 down vs. n   | 1.48E-45                 | 0.494657        | -1.11379         | 0.532327                 | -1.81052        | 121 down vs. n   | 0.173495                 | -5.60781        | 347 down vs. n   | 1.04913                  | 1.04913         | 353 up vs. n     | 0.71917                  | 1.20493         | 537 up vs. n     | 0.71917                  | 1.20493         | 537 up vs. n     | 0.71917                  | 1.20493         | 537 up vs. n   | 0.71917      | 1.20493      | 537 up vs. n   |              |         |              |
| 13831   | 0                | -0.40351                 | -2.47825        | 106 down vs. n   | 1.73781                  | 1.73781         | 111 up vs. n     | -0.48245                 | 4.08245         | 112 up vs. n     | -0.17228                 | 8.17228         | 121 up vs. n     | -0.0056409               | -176.402        | 347 down vs. n   | 4.36559                  | 4.36559         | 353 up vs. n     | 0.158445                 | 6.31136         | 537 down vs. n   | 0.158445                 | 6.31136         | 537 down vs. n   | 0.158445                 | 6.31136         | 537 down vs. n | 0.158445     | 6.31136      | 537 down vs. n |              |         |              |
| 13832   | 2.79E-33         | 0.959259                 | -1.00476        | 106 down vs. n   | 6.70809                  | 6.70809         | 111 up vs. n     | 3.0721                   | 3.0721          | 112 down vs. n   | 0.3022                   | 3.0922          | 121 down vs. n   | 0.153289                 | -6.5262         | 347 down vs. n   | 1.43893                  | 1.43893         | 353 up vs. n     | 1.58484                  | 1.58484         | 537 up vs. n     | 1.58484                  | 1.58484         | 537 up vs. n     | 1.58484                  | 1.58484         | 537 up vs. n   | 1.58484      | 1.58484      | 537 up vs. n   |              |         |              |
| 13833   | 0                | 0.19554                  | -0.54046        | 106 down vs. n   | 1.15545                  | -0.54046        | 111 down vs. n   | 1.23438                  | 1.23438         | 112 up vs. n     | 2.40602                  | 2.40602         | 121 up vs. n     | 0.594981                 | -1.60075        | 347 down vs. n   | 0.682227                 | -1.75152        | 353 down vs. n   | 1.29664                  | 1.29664         | 537 up vs. n     | 1.29664                  | 1.29664         | 537 up vs. n     | 1.29664                  | 1.29664         | 537 up vs. n   | 1.29664      | 1.29664      | 537 up vs. n   |              |         |              |
| 13834   | 3.29E-41         | -0.0294701               | -33.9327        | 106 down vs. n   | 6.27936                  | 6.27936         | 111 up vs. n     | 3.33E-38                 | 1.3831          | 1.3831           | 112 up vs. n             | -0.91232        | 9.1232           | 121 up vs. n             | 1.83E-34        | 0.888047         | -1.12607                 | 347 down vs. n  | 5.71E-40         | 0.35115                  | -1.17344        | 353 down vs. n   | 3.77E-43                 | 2.94558         | 2.94558          | 537 up vs. n             | 1.40E-45        | 5.24934        | 5.24934      | 537 up vs. n | 1.40E-45       | 5.24934      | 5.24934 | 537 up vs. n |
| 13835   | 4.71E-42         | 0.519411                 | -1.95236        | 106 down vs. n   | 6.61E-44                 | 0.0941278       | -10.6238         | 111 down vs. n           | 3.65174         | 3.65174          | 112 up vs. n             | 5.03E-43        | 1.66356          | 1.66356                  | 121 up vs. n    | 3.90401          | 3.90401                  | 347 down vs. n  | 2.47E-41         | 0.620827                 | -1.01755        | 353 down vs. n   | 5.15358                  | 5.15358         | 537 up vs. n     | 5.08E-37                 | 1.09177         | 1.09177        | 537 up vs. n | 4.58E+11     | 2.8816         | 4.55E-13     |         |              |
| 13836   | 0                | 0.59229                  | -1.66213        | 106 down vs. n   | 1.59284                  | -1.66213        | 111 down vs. n   | 0.75017                  | -1.66213        | 112 up vs. n     | 0.140523                 | -2.90422        | 121 down vs. n   | 0.121616                 | -2.90422        | 347 down vs. n   | 0.121616                 | -2.90422        | 353 down vs. n   | 2.55078                  | 2.55078         | 537 up vs. n     | 2.55078                  | 2.55078         | 537 up vs. n     | 2.55078                  | 2.55078         | 537 up vs. n   | 2.55078      | 2.55078      | 537 up vs. n   |              |         |              |
| 13837   | 0                | 0.0153392                | -0.64394        | 106 down vs. n   | 5.48745                  | 5.48745         | 111 up vs. n     | 0.83824                  | 8.38224         | 112 up vs. n     | -0.47094                 | 4.7094          | 121 down vs. n   | 0.0426187                | -61.695         | 347 down vs. n   | 0.0426187                | -61.695         | 353 down vs. n   | 2.8276                   | 2.8276          | 537 up vs. n     | 2.8276                   | 2.8276          | 537 up vs. n     | 2.8276                   | 2.8276          | 537 up vs. n   | 2.8276       | 2.8276       | 537 up vs. n   |              |         |              |
| 13838   | 0                | 0.0818966                | -52.7165        | 106 down vs. n   | -1.41631                 | 1.41631         | 111 up vs. n     | 0.776066                 | -1.28765        | 112 down vs. n   | -0.113469                | 8.81266         | 121 down vs. n   | -0.154571                | 1.5675          | 347 up vs. n     | -0.1                     |                 |                  |                          |                 |                  |                          |                 |                  |                          |                 |                |              |              |                |              |         |              |

File: ESM\_10 (Online Resource 10)

Figure: Comparative Multidimensional Molecular Analyses of Pediatric Diffuse Intrinsic Piloile Gloma Reveals Distinct Molecular Subtypes

Journal: Acta Neuropathologica

Authors: Amanda M. Senn, Madhuri Kumbhakar, Kendall Snyder, Sidley Yavitze, Jon Deveney,

Breanna Harmon, Jordan Hall, Eric H. Raabe, Ping An, Melanie Weingart, Brian Ross, Sarah Muege, Roger J. Packer, Javad Nazarian

Corresponding Author:

Javad Nazarian, Children's National Medical Center, Center for Genetic Medicine

111 Michigan Ave., NW, Washington DC, 20010

Phone: 202-476-0022 Fax: 202-476-0014

Email: J.Nazarian@CNMC.org

| Gene ID | P | FolChang106 |  | p | FolChang107 |  | p | FolChang108 |  | p | FolChang109 |  | p | FolChang110 |  | p | FolChang111 |  | p | FolChang112 |  | p | FolChang113 |  | p | FolChang114 |  | p | FolChang115 |  | p | FolChang116 |  | p | FolChang117 |  | p | FolChang118 |  | p | FolChang119 |  | p | FolChang120 |  | p | FolChang121 |  | p | FolChang122 |  | p | FolChang123 |  | p | FolChang124 |  | p | FolChang125 |  | p | FolChang126 |  | p | FolChang127 |  | p | FolChang128 |  | p | FolChang129 |  | p | FolChang130 |  | p | FolChang131 |  | p | FolChang132 |  | p | FolChang133 |  | p | FolChang134 |  | p | FolChang135 |  | p | FolChang136 |  | p | FolChang137 |  | p | FolChang138 |  | p | FolChang139 |  | p | FolChang140 |  | p | FolChang141 |  | p | FolChang142 |  | p | FolChang143 |  | p | FolChang144 |  | p | FolChang145 |  | p | FolChang146 |  | p | FolChang147 |  | p | FolChang148 |  | p | FolChang149 |  | p | FolChang150 |  | p | FolChang151 |  | p | FolChang152 |  | p | FolChang153 |  | p | FolChang154 |  | p | FolChang155 |  | p | FolChang156 |  | p | FolChang157 |  | p | FolChang158 |  | p | FolChang159 |  | p | FolChang160 |  | p | FolChang161 |  | p | FolChang162 |  | p | FolChang163 |  | p | FolChang164 |  | p | FolChang165 |  | p | FolChang166 |  | p | FolChang167 |  | p | FolChang168 |  | p | FolChang169 |  | p | FolChang170 |  | p | FolChang171 |  | p | FolChang172 |  | p | FolChang173 |  | p | FolChang174 |  | p | FolChang175 |  | p | FolChang176 |  | p | FolChang177 |  | p | FolChang178 |  | p | FolChang179 |  | p | FolChang180 |  | p | FolChang181 |  | p | FolChang182 |  | p | FolChang183 |  | p | FolChang184 |  | p | FolChang185 |  | p | FolChang186 |  | p | FolChang187 |  | p | FolChang188 |  | p | FolChang189 |  | p | FolChang190 |  | p | FolChang191 |  | p | FolChang192 |  | p | FolChang193 |  | p | FolChang194 |  | p | FolChang195 |  | p | FolChang196 |  | p | FolChang197 |  | p | FolChang198 |  | p | FolChang199 |  | p | FolChang200 |  | p | FolChang201 |  | p | FolChang202 |  | p | FolChang203 |  | p | FolChang204 |  | p | FolChang205 |  | p | FolChang206 |  | p | FolChang207 |  | p | FolChang208 |  | p | FolChang209 |  | p | FolChang210 |  | p | FolChang211 |  | p | FolChang212 |  | p | FolChang213 |  | p | FolChang214 |  | p | FolChang215 |  | p | FolChang216 |  | p | FolChang217 |  | p | FolChang218 |  | p | FolChang219 |  | p | FolChang220 |  | p | FolChang221 |  | p | FolChang222 |  | p | FolChang223 |  | p | FolChang224 |  | p | FolChang225 |  | p | FolChang226 |  | p | FolChang227 |  | p | FolChang228 |  | p | FolChang229 |  | p | FolChang230 |  | p | FolChang231 |  | p | FolChang232 |  | p | FolChang233 |  | p | FolChang234 |  | p | FolChang235 |  | p | FolChang236 |  | p | FolChang237 |  | p | FolChang238 |  | p | FolChang239 |  | p | FolChang240 |  | p | FolChang241 |  | p | FolChang242 |  | p | FolChang243 |  | p | FolChang244 |  | p | FolChang245 |  | p | FolChang246 |  | p | FolChang247 |  | p | FolChang248 |  | p | FolChang249 |  | p | FolChang250 |  | p | FolChang251 |  | p | FolChang252 |  | p | FolChang253 |  | p | FolChang254 |  | p | FolChang255 |  | p | FolChang256 |  | p | FolChang257 |  | p | FolChang258 |  | p | FolChang259 |  | p | FolChang260 |  | p | FolChang261 |  | p | FolChang262 |  | p | FolChang263 |  | p | FolChang264 |  | p | FolChang265 |  | p | FolChang266 |  | p | FolChang267 |  | p | FolChang268 |  | p | FolChang269 |  | p | FolChang270 |  | p | FolChang271 |  | p | FolChang272 |  | p | FolChang273 |  | p | FolChang274 |  | p | FolChang275 |  | p | FolChang276 |  | p | FolChang277 |  | p | FolChang278 |  | p | FolChang279 |  | p | FolChang280 |  | p | FolChang281 |  | p | FolChang282 |  | p | FolChang283 |  | p | FolChang284 |  | p | FolChang285 |  | p | FolChang286 |  | p | FolChang287 |  | p | FolChang288 |  | p | FolChang289 |  | p | FolChang290 |  | p | FolChang291 |  | p | FolChang292 |  | p | FolChang293 |  | p | FolChang294 |  | p | FolChang295 |  | p | FolChang296 |  | p | FolChang297 |  | p | FolChang298 |  | p | FolChang299 |  | p | FolChang300 |  | p | FolChang301 |  | p | FolChang302 |  | p | FolChang303 |  | p | FolChang304 |  | p | FolChang305 |  | p | FolChang306 |  | p | FolChang307 |  | p | FolChang308 |  | p | FolChang309 |  | p | FolChang310 |  | p | FolChang311 |  | p | FolChang312 |  | p | FolChang313 |  | p | FolChang314 |  | p | FolChang315 |  | p | FolChang316 |  | p | FolChang317 |  | p | FolChang318 |  | p | FolChang319 |  | p | FolChang320 |  | p | FolChang321 |  | p | FolChang322 |  | p | FolChang323 |  | p | FolChang324 |  | p | FolChang325 |  | p | FolChang326 |  | p | FolChang327 |  | p | FolChang328 |  | p | FolChang329 |  | p | FolChang330 |  | p | FolChang331 |  | p | FolChang332 |  | p | FolChang333 |  | p | FolChang334 |  | p | FolChang335 |  | p | FolChang336 |  | p | FolChang337 |  | p | FolChang338 |  | p | FolChang339 |  | p | FolChang340 |  | p | FolChang341 |  | p | FolChang342 |  | p | FolChang343 |  | p | FolChang344 |  | p | FolChang345 |  | p | FolChang346 |  | p | FolChang347 |  | p | FolChang348 |  | p | FolChang349 |  | p | FolChang350 |  | p | FolChang351 |  | p | FolChang352 |  | p | FolChang353 |  | p | FolChang354 |  | p | FolChang355 |  | p | FolChang356 |  | p | FolChang357 |  | p | FolChang358 |  | p | FolChang359 |  | p | FolChang360 |  | p | FolChang361 |  | p | FolChang362 |  |
|---------|---|-------------|--|---|-------------|--|---|-------------|--|---|-------------|--|---|-------------|--|---|-------------|--|---|-------------|--|---|-------------|--|---|-------------|--|---|-------------|--|---|-------------|--|---|-------------|--|---|-------------|--|---|-------------|--|---|-------------|--|---|-------------|--|---|-------------|--|---|-------------|--|---|-------------|--|---|-------------|--|---|-------------|--|---|-------------|--|---|-------------|--|---|-------------|--|---|-------------|--|---|-------------|--|---|-------------|--|---|-------------|--|---|-------------|--|---|-------------|--|---|-------------|--|---|-------------|--|---|-------------|--|---|-------------|--|---|-------------|--|---|-------------|--|---|-------------|--|---|-------------|--|---|-------------|--|---|-------------|--|---|-------------|--|---|-------------|--|---|-------------|--|---|-------------|--|---|-------------|--|---|-------------|--|---|-------------|--|---|-------------|--|---|-------------|--|---|-------------|--|---|-------------|--|---|-------------|--|---|-------------|--|---|-------------|--|---|-------------|--|---|-------------|--|---|-------------|--|---|-------------|--|---|-------------|--|---|-------------|--|---|-------------|--|---|-------------|--|---|-------------|--|---|-------------|--|---|-------------|--|---|-------------|--|---|-------------|--|---|-------------|--|---|-------------|--|---|-------------|--|---|-------------|--|---|-------------|--|---|-------------|--|---|-------------|--|---|-------------|--|---|-------------|--|---|-------------|--|---|-------------|--|---|-------------|--|---|-------------|--|---|-------------|--|---|-------------|--|---|-------------|--|---|-------------|--|---|-------------|--|---|-------------|--|---|-------------|--|---|-------------|--|---|-------------|--|---|-------------|--|---|-------------|--|---|-------------|--|---|-------------|--|---|-------------|--|---|-------------|--|---|-------------|--|---|-------------|--|---|-------------|--|---|-------------|--|---|-------------|--|---|-------------|--|---|-------------|--|---|-------------|--|---|-------------|--|---|-------------|--|---|-------------|--|---|-------------|--|---|-------------|--|---|-------------|--|---|-------------|--|---|-------------|--|---|-------------|--|---|-------------|--|---|-------------|--|---|-------------|--|---|-------------|--|---|-------------|--|---|-------------|--|---|-------------|--|---|-------------|--|---|-------------|--|---|-------------|--|---|-------------|--|---|-------------|--|---|-------------|--|---|-------------|--|---|-------------|--|---|-------------|--|---|-------------|--|---|-------------|--|---|-------------|--|---|-------------|--|---|-------------|--|---|-------------|--|---|-------------|--|---|-------------|--|---|-------------|--|---|-------------|--|---|-------------|--|---|-------------|--|---|-------------|--|---|-------------|--|---|-------------|--|---|-------------|--|---|-------------|--|---|-------------|--|---|-------------|--|---|-------------|--|---|-------------|--|---|-------------|--|---|-------------|--|---|-------------|--|---|-------------|--|---|-------------|--|---|-------------|--|---|-------------|--|---|-------------|--|---|-------------|--|---|-------------|--|---|-------------|--|---|-------------|--|---|-------------|--|---|-------------|--|---|-------------|--|---|-------------|--|---|-------------|--|---|-------------|--|---|-------------|--|---|-------------|--|---|-------------|--|---|-------------|--|---|-------------|--|---|-------------|--|---|-------------|--|---|-------------|--|---|-------------|--|---|-------------|--|---|-------------|--|---|-------------|--|---|-------------|--|---|-------------|--|---|-------------|--|---|-------------|--|---|-------------|--|---|-------------|--|---|-------------|--|---|-------------|--|---|-------------|--|---|-------------|--|---|-------------|--|---|-------------|--|---|-------------|--|---|-------------|--|---|-------------|--|---|-------------|--|---|-------------|--|---|-------------|--|---|-------------|--|---|-------------|--|---|-------------|--|---|-------------|--|---|-------------|--|---|-------------|--|---|-------------|--|---|-------------|--|---|-------------|--|---|-------------|--|---|-------------|--|---|-------------|--|---|-------------|--|---|-------------|--|---|-------------|--|---|-------------|--|---|-------------|--|---|-------------|--|---|-------------|--|---|-------------|--|---|-------------|--|---|-------------|--|---|-------------|--|---|-------------|--|---|-------------|--|---|-------------|--|---|-------------|--|---|-------------|--|---|-------------|--|---|-------------|--|---|-------------|--|---|-------------|--|---|-------------|--|---|-------------|--|---|-------------|--|---|-------------|--|---|-------------|--|---|-------------|--|---|-------------|--|---|-------------|--|---|-------------|--|---|-------------|--|---|-------------|--|---|-------------|--|---|-------------|--|---|-------------|--|---|-------------|--|---|-------------|--|---|-------------|--|---|-------------|--|---|-------------|--|---|-------------|--|---|-------------|--|---|-------------|--|---|-------------|--|---|-------------|--|---|-------------|--|---|-------------|--|---|-------------|--|---|-------------|--|
|---------|---|-------------|--|---|-------------|--|---|-------------|--|---|-------------|--|---|-------------|--|---|-------------|--|---|-------------|--|---|-------------|--|---|-------------|--|---|-------------|--|---|-------------|--|---|-------------|--|---|-------------|--|---|-------------|--|---|-------------|--|---|-------------|--|---|-------------|--|---|-------------|--|---|-------------|--|---|-------------|--|---|-------------|--|---|-------------|--|---|-------------|--|---|-------------|--|---|-------------|--|---|-------------|--|---|-------------|--|---|-------------|--|---|-------------|--|---|-------------|--|---|-------------|--|---|-------------|--|---|-------------|--|---|-------------|--|---|-------------|--|---|-------------|--|---|-------------|--|---|-------------|--|---|-------------|--|---|-------------|--|---|-------------|--|---|-------------|--|---|-------------|--|---|-------------|--|---|-------------|--|---|-------------|--|---|-------------|--|---|-------------|--|---|-------------|--|---|-------------|--|---|-------------|--|---|-------------|--|---|-------------|--|---|-------------|--|---|-------------|--|---|-------------|--|---|-------------|--|---|-------------|--|---|-------------|--|---|-------------|--|---|-------------|--|---|-------------|--|---|-------------|--|---|-------------|--|---|-------------|--|---|-------------|--|---|-------------|--|---|-------------|--|---|-------------|--|---|-------------|--|---|-------------|--|---|-------------|--|---|-------------|--|---|-------------|--|---|-------------|--|---|-------------|--|---|-------------|--|---|-------------|--|---|-------------|--|---|-------------|--|---|-------------|--|---|-------------|--|---|-------------|--|---|-------------|--|---|-------------|--|---|-------------|--|---|-------------|--|---|-------------|--|---|-------------|--|---|-------------|--|---|-------------|--|---|-------------|--|---|-------------|--|---|-------------|--|---|-------------|--|---|-------------|--|---|-------------|--|---|-------------|--|---|-------------|--|---|-------------|--|---|-------------|--|---|-------------|--|---|-------------|--|---|-------------|--|---|-------------|--|---|-------------|--|---|-------------|--|---|-------------|--|---|-------------|--|---|-------------|--|---|-------------|--|---|-------------|--|---|-------------|--|---|-------------|--|---|-------------|--|---|-------------|--|---|-------------|--|---|-------------|--|---|-------------|--|---|-------------|--|---|-------------|--|---|-------------|--|---|-------------|--|---|-------------|--|---|-------------|--|---|-------------|--|---|-------------|--|---|-------------|--|---|-------------|--|---|-------------|--|---|-------------|--|---|-------------|--|---|-------------|--|---|-------------|--|---|-------------|--|---|-------------|--|---|-------------|--|---|-------------|--|---|-------------|--|---|-------------|--|---|-------------|--|---|-------------|--|---|-------------|--|---|-------------|--|---|-------------|--|---|-------------|--|---|-------------|--|---|-------------|--|---|-------------|--|---|-------------|--|---|-------------|--|---|-------------|--|---|-------------|--|---|-------------|--|---|-------------|--|---|-------------|--|---|-------------|--|---|-------------|--|---|-------------|--|---|-------------|--|---|-------------|--|---|-------------|--|---|-------------|--|---|-------------|--|---|-------------|--|---|-------------|--|---|-------------|--|---|-------------|--|---|-------------|--|---|-------------|--|---|-------------|--|---|-------------|--|---|-------------|--|---|-------------|--|---|-------------|--|---|-------------|--|---|-------------|--|---|-------------|--|---|-------------|--|---|-------------|--|---|-------------|--|---|-------------|--|---|-------------|--|---|-------------|--|---|-------------|--|---|-------------|--|---|-------------|--|---|-------------|--|---|-------------|--|---|-------------|--|---|-------------|--|---|-------------|--|---|-------------|--|---|-------------|--|---|-------------|--|---|-------------|--|---|-------------|--|---|-------------|--|---|-------------|--|---|-------------|--|---|-------------|--|---|-------------|--|---|-------------|--|---|-------------|--|---|-------------|--|---|-------------|--|---|-------------|--|---|-------------|--|---|-------------|--|---|-------------|--|---|-------------|--|---|-------------|--|---|-------------|--|---|-------------|--|---|-------------|--|---|-------------|--|---|-------------|--|---|-------------|--|---|-------------|--|---|-------------|--|---|-------------|--|---|-------------|--|---|-------------|--|---|-------------|--|---|-------------|--|---|-------------|--|---|-------------|--|---|-------------|--|---|-------------|--|---|-------------|--|---|-------------|--|---|-------------|--|---|-------------|--|---|-------------|--|---|-------------|--|---|-------------|--|---|-------------|--|---|-------------|--|---|-------------|--|---|-------------|--|---|-------------|--|---|-------------|--|---|-------------|--|---|-------------|--|---|-------------|--|---|-------------|--|---|-------------|--|---|-------------|--|---|-------------|--|---|-------------|--|---|-------------|--|---|-------------|--|---|-------------|--|---|-------------|--|---|-------------|--|---|-------------|--|---|-------------|--|

Journal: Acta Neuropathologica

Javad Nazarian, Children's National Medical Center, Center for Genetic Medicine

Phone: 202-476-6022 Fax: 202-476-6014

| value[106] | MeanRatio | FoldChange( 6 vs. n) | value[111] | MeanRatio | FoldChange( vs. n) | v |
|------------|-----------|----------------------|------------|-----------|--------------------|---|
|------------|-----------|----------------------|------------|-----------|--------------------|---|

**Title:** Comparative Multidimensional Molecular Analyses of Pediatric Diffuse Intrinsic Pontine Glioma Reveals Distinct Molecular Subtypes  
**Journal:** Acta Neuropathologica

Javad Nazarian, Children's National Medical Center, Center for Genetic Medicine  
111 Michigan Ave. NW, Washington DC 20010

Email: JNazarian@CNMC.org

File: ESM\_10 (Online Resource 10)

Title: Comparative Multidimensional Molecular Analyses of Pediatric Diffuse Intrinsic Glioma Reveals Distinct Molecular Subtypes

Journal: Acta Neuropathologica

Authors: Amanda M. Stransik, Madhuri Kumbhakar, Kendall Snyder, Sidicki Yavuz, Joe Devenney, Brennan Harmon, Jordan Hall, Eric H. Rubie, Ping An, Melanie Weingart, Brian Reid, Sarah Magize, Roger J. Packer, Javad Nazarian

Corresponding Author:

Javad Nazarian, Children's National Medical Center, Center for Genetic Medicine

111 Michigan Ave., NW, Washington DC, 20010

Phone: 202-476-6022 Fax: 202-476-6014

Email: J.Nazarian@CNMC.org

| Gene ID | P-<br>value[106] | Meanarati<br>(106 vs. n) | FoldChange[106] | P-<br>value[110] | Meanarati<br>(110 vs. n) | FoldChange[110] | P-<br>value[111] | Meanarati<br>(111 vs. n) | FoldChange[111] | P-<br>value[112] | Meanarati<br>(112 vs. n) | FoldChange[112] | P-<br>value[121] | Meanarati<br>(121 vs. n) | FoldChange[121] | FoldChange[347] |          | P-<br>value[353] | Meanarati<br>(353 vs. n) | FoldChange[353] | P-<br>value[357] | Meanarati<br>(357 vs. n) | FoldChange[357] | P-<br>value[563] | Meanarati<br>(563 vs. n) | FoldChange[563] | P-<br>value[566] | Meanarati<br>(566 vs. n) | FoldChange[566] | FPRD          | SMPD        | S50RER    | FPRER    |          |   |
|---------|------------------|--------------------------|-----------------|------------------|--------------------------|-----------------|------------------|--------------------------|-----------------|------------------|--------------------------|-----------------|------------------|--------------------------|-----------------|-----------------|----------|------------------|--------------------------|-----------------|------------------|--------------------------|-----------------|------------------|--------------------------|-----------------|------------------|--------------------------|-----------------|---------------|-------------|-----------|----------|----------|---|
|         |                  |                          |                 |                  |                          |                 |                  |                          |                 |                  |                          |                 |                  |                          |                 | vs. n           | vs. n    |                  |                          |                 |                  |                          |                 |                  |                          |                 |                  |                          |                 |               |             |           |          |          |   |
| 14218   | 0.400318         | -2.48022                 | 106 down vs n   | 0.234523         | 2.34523                  | 111 up vs n     | 0                | 0.740407                 | 4.70407         | 112 up vs n      | 0                        | 0.573715        | -1.86104         | 121 down vs n            | 0               | 0.103011        | -9.70768 | 347 down vs n    | 0                        | 2.4967          | 2.4967           | 353 up vs n              | 0               | 5.47817          | 5.47817                  | 537 up vs n     | 0                | 0.0174451                | 57.3228         | 563 down vs n | 7           | 16.8899   | 0        | 1        |   |
| 14219   | 0.172551         | 17.2551                  | 106 up vs n     | 1.59779          | 1.59779                  | 111 up vs n     | 0                | 1.57899                  | 1.57899         | 112 up vs n      | 0                        | 0.545388        | -1.83963         | 121 down vs n            | 0               | 0.140645        | -7.79761 | 347 down vs n    | 1.40E-45                 | 0.255123        | -4.44201         | 353 down vs n            | 1               | 1.48404          | 1.48404                  | 537 up vs n     | 0                | 0.234072                 | -4.2122         | 563 down vs n | 5.14E-15    | 55.3121   | 1.42E-14 | 1        |   |
| 14240   | 0.102039         | -9.80014                 | 106 down vs n   | 0.764135         | -1.38867                 | 111 down vs n   | 0                | 0.669335                 | -1.49042        | 112 down vs n    | 0                        | 0.377145        | -6.44449         | 121 down vs n            | 0               | 0.187618        | -2.72143 | 347 down vs n    | 0                        | -5.88106        | -2.7487          | 353 down vs n            | 0               | 0.00883858       | -1.3141                  | 537 up vs n     | 0                | 1.32413                  | 1.3141          | 563 up vs n   | 1.191E-15   | 1.86319   | 1.78E-15 | 1        |   |
| 14241   | 0.28204          | -3.50828                 | 106 down vs n   | 0.0934871        | -10.6967                 | 111 down vs n   | 0                | -1.78455                 | 1.78455         | 112 up vs n      | 0                        | -0.089405       | -11.1551         | 121 down vs n            | 0               | 0.733886        | 7.33886  | 347 up vs n      | 0                        | -0.747071       | -1.38556         | 353 down vs n            | 0               | 2.87302          | 2.87302                  | 537 up vs n     | 0                | 8.644E-39                | 1.04404         | 1.04404       | 563 up vs n | 2.300E-15 | 74.7445  | 2.84E-14 | 1 |
| 14242   | 0.075852         | -1.47961                 | 106 down vs n   | 4.53388          | 4.53388                  | 111 up vs n     | 0                | -0.0732415               | -11.6515        | 112 up vs n      | 0                        | -1.25316        | 1.25316          | 121 up vs n              | 0               | 0.253773        | -1.86439 | 347 down vs n    | 0                        | -0.330824       | -2.99312         | 353 down vs n            | 0               | 0.384932         | -1.70966                 | 537 down vs n   | 0                | 1.39644                  | 1.39644         | 563 up vs n   | 0           | 1.9002    | 1.9002   | 1        |   |
| 14243   | 0.132536         | 1.32536                  | 106 up vs n     | 0.311007         | 1.32536                  | 111 up vs n     | 0                | 0.218854                 | -5.48448        | 112 down vs n    | 0                        | 0.193402        | -1.25757         | 121 down vs n            | 0               | 0.439412        | 1.75842  | 347 down vs n    | 0                        | 0.131073        | 1.31073          | 353 up vs n              | 0               | -0.0913228       | -10.8702                 | 537 down vs n   | 0                | 1.70937                  | 1.70937         | 563 up vs n   | 1.040E-15   | 8.48564   | 7.11E-15 | 1        |   |
| 14244   | 0.0459336        | -1.80389                 | 106 down vs n   | 0.548975         | 5.48975                  | 111 up vs n     | 0                | -0.33953                 | 3.3953          | 112 up vs n      | 0                        | 0.944437        | -1.05883         | 121 down vs n            | 0               | 0.0135002       | -72.5288 | 347 down vs n    | 0                        | 0.0030894       | -32.639          | 353 down vs n            | 0               | 17.3433          | 17.3433                  | 537 up vs n     | 0                | 47.8305                  | 47.8305         | 563 up vs n   | 0           | 76.2244   | 0        | 1        |   |
| 14245   | 1.21E-42         | 1.10313                  | 1.10313         | 1.112            | 1.112                    | 1.112           | 1.112            | 0.350563                 | -2.59698        | 112 down vs n    | 0                        | 0.44436         | 8.44436          | 121 up vs n              | 0               | 0.271858        | -1.38916 | 347 down vs n    | 0                        | -0.3388         | 2.9516           | 353 down vs n            | 0               | 0.115502         | 0.0999479                | -10.0252        | 563 down vs n    | 5.14E-15                 | 55.3121         | 1.42E-14      | 1           |           |          |          |   |
| 14246   | 0.044882         | -2.06236                 | 106 down vs n   | 0.479529         | 4.79529                  | 111 up vs n     | 0                | 1.39124                  | 2.39124         | 112 up vs n      | 0                        | 0.064007        | -1.38125         | 121 down vs n            | 0               | 0.126966        | -7.89293 | 347 down vs n    | 0                        | 0.21465         | -4.662           | 353 down vs n            | 0               | 6.21342          | 6.21342                  | 537 up vs n     | 0                | 1.36516                  | 1.36516         | 563 up vs n   | 2.58E-15    | 41.8612   | 1.42E-14 | 1        |   |
| 14247   | 0.133837         | 1.33837                  | 106 up vs n     | 0.0194646        | -1.09332                 | 111 down vs n   | 0                | -0.0200864               | -49.7848        | 112 down vs n    | 0                        | 0.45662         | 3.45662          | 121 up vs n              | 0               | 0.252408        | -3.96183 | 347 down vs n    | 2.09E-40                 | 1.04279         | 1.04279          | 353 up vs n              | 4.28E-42        | 0.925415         | 1.0806                   | 537 down vs n   | 0                | 1.41205                  | 1.43105         | 563 up vs n   | 6.43E-14    | 7.837     | 1.07E-14 | 1        |   |
| 14248   | 0.114412         | -8.74033                 | 106 down vs n   | 0.38972          | 3.8972                   | 111 up vs n     | 0                | 2.5451                   | 2.5451          | 112 up vs n      | 0                        | 0.582923        | -5.99223         | 121 down vs n            | 0               | 0.382572        | -1.86759 | 347 down vs n    | 0                        | 0.27617         | 22.2617          | 353 up vs n              | 0               | 12.9865          | 12.9865                  | 537 up vs n     | 0                | 0.472684                 | 2.56379         | 563 up vs n   | 0           | 5.62639   | 0        | 1        |   |
| 14249   | 0.035429         | -2.66362                 | 106 down vs n   | 0.125468         | 6.15458                  | 111 up vs n     | 0                | 0.89993                  | 1.89993         | 112 up vs n      | 0                        | 1.64769         | 1.89993          | 121 up vs n              | 0               | 0.307722        | 1.23916  | 347 down vs n    | 0                        | 0.26747         | 2.9747           | 353 up vs n              | 0               | 7.03865          | 7.03865                  | 537 up vs n     | 0                | 0.054899                 | -1.77042        | 563 down vs n | 2.90E-15    | 47.1251   | 1.42E-14 | 1        |   |
| 14250   | 0.041304         | -2.43259                 | 106 down vs n   | 1.23122          | 1.23122                  | 111 up vs n     | 0                | 0.11845                  | 1.1845          | 112 up vs n      | 7.01E-45                 | 0.784257        | -1.27509         | 121 down vs n            | 0               | 0.209702        | -4.76868 | 347 down vs n    | 5.63E-38                 | 0.977784        | -1.02272         | 353 down vs n            | 1.40E-45        | 1.28624          | 1.28624                  | 537 up vs n     | 0                | 0.290957                 | -4.181          | 563 up vs n   | 1.82E-14    | 1.24935   | 1.42E-14 | 1        |   |
| 14251   | 0.0080319        | -14.499                  | 106 down vs n   | 0.71197          | 71.197                   | 111 up vs n     | 0                | 35.4817                  | 35.4817         | 112 up vs n      | 0                        | 0.24066         | -2.40679         | 121 up vs n              | 0               | 0.498235        | -2.00708 | 347 down vs n    | 0                        | 10.2588         | 10.2588          | 353 up vs n              | 0               | 79.9229          | 79.9229                  | 537 up vs n     | 0                | 0.65897                  | -1.45449        | 563 down vs n | 0           | 10.1113   | 0        | 1        |   |
| 14252   | 0.030252         | -2.76131                 | 106 down vs n   | 0.384868         | 1.01524                  | 111 down vs n   | 0                | 0.207334                 | -4.82314        | 112 down vs n    | 0                        | 0.194134        | -5.15107         | 121 down vs n            | 0               | 0.21846         | 2.21846  | 347 up vs n      | 0                        | 22.216          | 22.216           | 353 up vs n              | 0               | 0.0093882        | -16.4649                 | 563 down vs n   | 0                | 4.82404                  | 0               | 1             |             |           |          |          |   |
| 14253   | 0.138579         | 1.38579                  | 106 up vs n     | 0.039883         | -3.27202                 | 111 down vs n   | 0                | 0.24805                  | 2.4805          | 112 up vs n      | 0                        | 0.401465        | -1.6654          | 121 down vs n            | 0               | 0.56409         | -5.60409 | 353 up vs n      | 0                        | 1.80709         | 1.80709          | 537 up vs n              | 0               | -1.13346         | 1.13346                  | 563 up vs n     | 0                | 1.87078                  | 0               | 1             |             |           |          |          |   |
| 14254   | 0.126487         | -1.05953                 | 106 down vs n   | 0.174949         | -5.76373                 | 111 down vs n   | 0                | 2.74684                  | 2.74684         | 112 up vs n      | 0                        | 0.26042         | -1.84553         | 121 down vs n            | 0               | 0.196909        | 1.06909  | 347 down vs n    | 0                        | 2.49557         | 2.49557          | 353 up vs n              | 1.16E-42        | 0.048112         | -1.05747                 | 537 down vs n   | 3.400E-15        | 11.8132                  | 5.55E-15        | 1             |             |           |          |          |   |
| 14255   | 0.15345          | -1.935                   | 106 down vs n   | 0.439425         | 4.39425                  | 111 up vs n     | 0                | 0.194815                 | -1.935          | 112 up vs n      | 0                        | 0.63108         | -1.53445         | 121 down vs n            | 0               | 0.179481        | -5.57163 | 347 down vs n    | 0                        | 1.18627         | 1.18627          | 353 up vs n              | 0               | 1.12173          | 1.12173                  | 537 up vs n     | 0                | 1.6478                   | 0               | 1             |             |           |          |          |   |
| 14256   | 0.0034762        | -287.674                 | 106 down vs n   | -2.8552          | 2.8552                   | 111 up vs n     | 0                | 0.19501                  | 1.95001         | 112 up vs n      | 0                        | 0.239644        | -4.17286         | 121 down vs n            | 0               | 0.486306        | 4.86306  | 347 up vs n      | 0                        | -0.238495       | -4.18506         | 353 down vs n            | 0               | 0.038687         | -1.18493                 | 537 down vs n   | 0                | 1.1503                   | 1.1503          | 563 up vs n   | 0           | 78.5561   | 0        | 1        |   |
| 14257   | 0.21025          | 2.1025                   | 106 up vs n     | 0.21296          | 2.1296                   | 111 up vs n     | 0                | -1.215                   | 1.215           | 112 up vs n      | 0                        | -1.87489        | 1.47469          | 121 down vs n            | 0               | -0.11358        | -8.62962 | 347 down vs n    | 0                        | 0.043582        | -2.322           | 353 down vs n            | 0               | -0.34878         | 4.09924                  | 563 up vs n     | 0                | 4.222                    | 0               | 1             |             |           |          |          |   |
| 14258   | 0.24248          | 2.4248                   | 106 up vs n     | 0.24643          | 2.24643                  | 111 up vs n     | 0                | 0.386653                 | -1.00763        | 112 up vs n      | 0                        | 0.634874        | -1.6374          | 121 up vs n              | 0               | 0.178406        | -1.27441 | 347 down vs n    | 0                        | 0.660587        | -1.64857         | 353 down vs n            | 0               | 0.0449012        | -2.27711                 | 537 down vs n   | 0                | 1.40415                  | 0               | 1             |             |           |          |          |   |
| 14259   | 0.132768         | 1.32768                  | 106 up vs n     | 0.16789          | 1.6789                   | 111 up vs n     | 2.80E-45         | 1.16977                  | 1.16789         | 112 up vs n      | 0                        | 0.229164        | -4.36369         | 121 down vs n            | 0               | 0.542381        | -1.84202 | 347 down vs n    | 0                        | 2.93646         | -1.77033         | 353 down vs n            | 0               | 2.0299           | 2.0299                   | 537 up vs n     | 0                | 2.06437                  | 2.06437         | 563 up vs n   | 4.45E-14    | 1.6159    | 7.11E-15 | 1        |   |
| 14260   | 0.13637          | 1.6367                   | 106 up vs n     | 0.0468426        | -2.13481                 | 111 down vs n   | 0                | -0.126366                | -7.89851        | 112 down vs n    | 1.76E-39                 | 0.105735        | -10.6705         | 121 down vs n            | 0               | 0.152578        | 1.8466   | 347 down vs n    | 0                        | 2.93056         | 2.93056          | 353 up vs n              | 0               | 3.5884           | 3.5884                   | 537 up vs n     | 0                | 0.074166                 | -1.22373        | 563 down vs n | 1.550E-15   | 12.6469   | 7.11E-15 | 1        |   |
| 14261   | 0.21935          | -1.21935                 | 106 down vs n   | 0.946274         | 9.46274                  | 111 up vs n     | 0                | 0.57741                  | 5.7741          | 112 up vs n      | 0                        | 0.0937365       | -10.6705         | 121 down vs n            | 0               | 0.118193        | -8.46073 | 347 down vs n    | 0                        | 2.28453         | 2.28453          | 353 down vs n            | 0               | 0.503922         | 1.98522                  | 537 down vs n   | 0                | 6.5108                   | 6.5108          | 563 up vs n   | 5.01E-15    | 50.827    | 2.84E-14 | 1        |   |
| 14262   | 1.40E-45         | 1.1431                   | 1.1431          | 0.00812          | -2.45026                 | 111 down vs n   | 0                | 0.158819                 | 1.32078         | 112 down vs n    | 0                        | 0.132078        | 1.32078          | 121 up vs n              | 0               | 0.257423        | -2.95059 | 347 down vs n    | 0                        | 0.38231         | -3.85078         | 353 down vs n            | 0               | 1.36664          | 1.36664                  | 537 up vs n     | 0                | 0.072758                 | -1.37442        | 563 down vs n | 5.06E-14    | 1.02547   | 3.55E-15 | 1        |   |
| 14263   | 0.11631          | 1.1631                   | 106 up vs n     | 0.22371          | 2.2371                   | 111 up vs n     | 0                | 0.11097                  | 1.1097          | 112 up vs n      | 0                        | 0.490261        | -2.03973         | 121 down vs n            | 0               | 0.277823        | -3.59942 | 347 down vs n    | 0                        | 0.386581        | -2.8508          | 353 down vs n            | 0               | 17.448           | 17.448                   | 537 up vs n     | 0                | 0.297597                 | -2.97597        | 563 up vs n   | 0           | 257.943   | 0        | 1        |   |
| 14264   | 0.230709         | 2.30709                  | 106 up vs n     | 0.230709         | 2.30709                  | 111 up vs n     | 0                | 0.11097                  | 1.1097          | 112 up vs n      | 0                        | 0.490261        | -2.03973         | 121 down vs n            | 0               | 0.277823        | -3.59942 | 347 down vs n    | 0                        | 0.386581        | -2.8508          | 353 down vs n            | 0               | 17.448           | 17.448                   | 537 up vs n     | 0                | 0.297597                 | -2.97597        | 563 up vs n   | 0           | 257.943   | 0        | 1        |   |
| 14265   | 0.0732172        | -1.3658                  | 106 down vs n   | 0.492789         | -2.02927                 | 111 down vs n   | 0                | 0.763371                 | -1.30485        | 112 down vs n    | 0                        | 0.363708        | -2.74946         | 121 down vs n            | 2.04E-38        | 0.084578        | -1.0185  | 347 down vs n    | 0                        | 0.945792        | -1.81907         | 353 down vs n            | 1.40E-45        | 0.803637         | -1.24517                 | 537 down vs n   | 0                | 0.249558                 | -4.08091        | 563 down vs n | 2.20E-14    | 1.78952   | 7.11E-15 | 1        |   |
| 14266   | 0.0484865        | -2.06243                 | 106 down vs n   | 0.20639          | 2.0639                   | 111 up vs n     | 4.84E-42         | 0.093159                 | -1.09243        | 112 down vs n    | 3.70E-43                 | 1.2221          | 1.2221           | 121 up vs n              | 0               | 0.145208        | -8.86666 | 347 down vs n    | 0                        | 1.35281         | 1.35281          | 353 up vs n              | 0               | 0.84793          | 3.8793                   | 563 up vs n     | 0                | 1.75E-15                 | 28.4328         | 1.42E-14      | 1           |           |          |          |   |
| 14267   | 0.17027          | -1.02707                 | 106 down vs n   | 0.17027          | -1.02707                 | 111 down vs n   | 0                | 0.17027                  | -1.02707        | 112 down vs n    | 0                        | 0.17027         | -1.02707         | 121 down vs n            | 0               | 0.17027         | -1.02707 | 347 down vs n    | 0                        | 0.17027         | -1.02707         | 353 down vs n            | 0               | 0.17027          | -1.02707                 |                 |                  |                          |                 |               |             |           |          |          |   |



| Gene ID | P-value | FolChang106 |  | FolChang107 | P-value | FolChang108 |  | FolChang109 | P-value | FolChang110 |  | FolChang111 | P-value | FolChang112 |  | FolChang113 | P-value | FolChang114 |  | FolChang115 | P-value | FolChang116 |  | FolChang117 | P-value | FolChang118 |  | FolChang119 | P-value | FolChang120 |  | FolChang121 | P-value | FolChang122 |  | FolChang123 | P-value | FolChang124 |  | FolChang125 | P-value | FolChang126 |  | FolChang127 | P-value | FolChang128 |  | FolChang129 | P-value | FolChang130 |  | FolChang131 | P-value | FolChang132 |  | FolChang133 | P-value | FolChang134 |  | FolChang135 | P-value | FolChang136 |  | FolChang137 | P-value | FolChang138 |  | FolChang139 | P-value | FolChang140 |  | FolChang141 | P-value | FolChang142 |  | FolChang143 | P-value | FolChang144 |  | FolChang145 | P-value | FolChang146 |  | FolChang147 | P-value | FolChang148 |  | FolChang149 | P-value | FolChang150 |  | FolChang151 | P-value | FolChang152 |  | FolChang153 | P-value | FolChang154 |  | FolChang155 | P-value | FolChang156 |  | FolChang157 | P-value | FolChang158 |  | FolChang159 | P-value | FolChang160 |  | FolChang161 | P-value | FolChang162 |  | FolChang163 | P-value | FolChang164 |  | FolChang165 | P-value | FolChang166 |  | FolChang167 | P-value | FolChang168 |  | FolChang169 | P-value | FolChang170 |  | FolChang171 | P-value | FolChang172 |  | FolChang173 | P-value | FolChang174 |  | FolChang175 | P-value | FolChang176 |  | FolChang177 | P-value | FolChang178 |  | FolChang179 | P-value | FolChang180 |  | FolChang181 | P-value | FolChang182 |  | FolChang183 | P-value | FolChang184 |  | FolChang185 | P-value | FolChang186 |  | FolChang187 | P-value | FolChang188 |  | FolChang189 | P-value | FolChang190 |  | FolChang191 | P-value | FolChang192 |  | FolChang193 | P-value | FolChang194 |  | FolChang195 | P-value | FolChang196 |  | FolChang197 | P-value | FolChang198 |  | FolChang199 | P-value | FolChang200 |  | FolChang201 | P-value | FolChang202 |  | FolChang203 | P-value | FolChang204 |  | FolChang205 | P-value | FolChang206 |  | FolChang207 | P-value | FolChang208 |  | FolChang209 | P-value | FolChang210 |  | FolChang211 | P-value | FolChang212 |  | FolChang213 | P-value | FolChang214 |  | FolChang215 | P-value | FolChang216 |  | FolChang217 | P-value | FolChang218 |  | FolChang219 | P-value | FolChang220 |  | FolChang221 | P-value | FolChang222 |  | FolChang223 | P-value | FolChang224 |  | FolChang225 | P-value | FolChang226 |  | FolChang227 | P-value | FolChang228 |  | FolChang229 | P-value | FolChang230 |  | FolChang231 | P-value | FolChang232 |  | FolChang233 | P-value | FolChang234 |  | FolChang235 | P-value | FolChang236 |  | FolChang237 | P-value | FolChang238 |  | FolChang239 | P-value | FolChang240 |  | FolChang241 | P-value | FolChang242 |  | FolChang243 | P-value | FolChang244 |  | FolChang245 | P-value | FolChang246 |  | FolChang247 | P-value | FolChang248 |  | FolChang249 | P-value | FolChang250 |  | FolChang251 | P-value | FolChang252 |  | FolChang253 | P-value | FolChang254 |  | FolChang255 | P-value | FolChang256 |  | FolChang257 | P-value | FolChang258 |  | FolChang259 | P-value | FolChang260 |  | FolChang261 | P-value | FolChang262 |  | FolChang263 | P-value | FolChang264 |  | FolChang265 | P-value | FolChang266 |  | FolChang267 | P-value | FolChang268 |  | FolChang269 | P-value | FolChang270 |  | FolChang271 | P-value | FolChang272 |  | FolChang273 | P-value | FolChang274 |  | FolChang275 | P-value | FolChang276 |  | FolChang277 | P-value | FolChang278 |  | FolChang279 | P-value | FolChang280 |  | FolChang281 | P-value | FolChang282 |  | FolChang283 | P-value | FolChang284 |  | FolChang285 | P-value | FolChang286 |  | FolChang287 | P-value | FolChang288 |  | FolChang289 | P-value | FolChang290 |  | FolChang291 | P-value | FolChang292 |  | FolChang293 | P-value | FolChang294 |  | FolChang295 | P-value | FolChang296 |  | FolChang297 | P-value | FolChang298 |  | FolChang299 | P-value | FolChang300 |  | FolChang301 | P-value | FolChang302 |  | FolChang303 | P-value | FolChang304 |  | FolChang305 | P-value | FolChang306 |  | FolChang307 | P-value | FolChang308 |  | FolChang309 | P-value | FolChang310 |  | FolChang311 | P-value | FolChang312 |  | FolChang313 | P-value | FolChang314 |  | FolChang315 | P-value | FolChang316 |  | FolChang317 | P-value | FolChang318 |  | FolChang319 | P-value | FolChang320 |  | FolChang321 | P-value | FolChang322 |  | FolChang323 | P-value | FolChang324 |  | FolChang325 | P-value | FolChang326 |  | FolChang327 | P-value | FolChang328 |  | FolChang329 | P-value | FolChang330 |  | FolChang331 | P-value | FolChang332 |  | FolChang333 | P-value | FolChang334 |  | FolChang335 | P-value | FolChang336 |  | FolChang337 | P-value | FolChang338 |  | FolChang339 | P-value | FolChang340 |  | FolChang341 | P-value | FolChang342 |  | FolChang343 | P-value | FolChang344 |  | FolChang345 | P-value | FolChang346 |  | FolChang347 | P-value | FolChang348 |  | FolChang349 | P-value | FolChang350 |  | FolChang351 | P-value | FolChang352 |  | FolChang353 | P-value | FolChang354 |  | FolChang355 | P-value | FolChang356 |  | FolChang357 | P-value | FolChang358 |  | FolChang359 | P-value | FolChang360 |  | FolChang361 | P-value | FolChang362 |  | FolChang363 | P-value | FolChang364 |  | FolChang365 | P-value | FolChang366 |  | FolChang367 | P-value | FolChang368 |  | FolChang369 | P-value | FolChang370 |  | FolChang371 | P-value | FolChang372 |  | FolChang373 | P-value | FolChang374 |  | FolChang375 | P-value | FolChang376 |  | FolChang377 | P-value | FolChang378 |  | FolChang379 | P-value | FolChang380 |  | FolChang381 | P-value | FolChang382 |  | FolChang383 | P-value | FolChang384 |  | FolChang385 | P-value | FolChang386 |  | FolChang387 | P-value | FolChang388 |  | FolChang389 | P-value | FolChang390 |  | FolChang391 | P-value | FolChang392 |  | FolChang393 | P-value | FolChang394 |  | FolChang395 | P-value | FolChang396 |  | FolChang397 | P-value | FolChang398 |  | FolChang399 | P-value | FolChang400 |  | FolChang401 | P-value | FolChang402 |  | FolChang403 | P-value | FolChang404 |  | FolChang405 | P-value | FolChang406 |  | FolChang407 | P-value | FolChang408 |  | FolChang409 | P-value | FolChang410 |  | FolChang411 | P-value | FolChang412 |  | FolChang413 | P-value | FolChang414 |  | FolChang415 | P-value | FolChang416 |  | FolChang417 | P-value | FolChang418 |  | FolChang419 | P-value | FolChang420 |  | FolChang421 | P-value | FolChang422 |  | FolChang423 | P-value | FolChang424 |  | FolChang425 | P-value | FolChang426 |  | FolChang427 | P-value | FolChang428 |  | FolChang429 | P-value | FolChang430 |  | FolChang431 | P-value | FolChang432 |  | FolChang433 | P-value | FolChang434 |  | FolChang435 | P-value | FolChang436 |  | FolChang437 | P-value | FolChang438 |  | FolChang439 | P-value | FolChang440 |  | FolChang441 | P-value | FolChang442 |  | FolChang443 | P-value | FolChang444 |  | FolChang445 | P-value | FolChang446 |  | FolChang447 | P-value | FolChang448 |  | FolChang449 | P-value | FolChang450 |
|---------|---------|-------------|--|-------------|---------|-------------|--|-------------|---------|-------------|--|-------------|---------|-------------|--|-------------|---------|-------------|--|-------------|---------|-------------|--|-------------|---------|-------------|--|-------------|---------|-------------|--|-------------|---------|-------------|--|-------------|---------|-------------|--|-------------|---------|-------------|--|-------------|---------|-------------|--|-------------|---------|-------------|--|-------------|---------|-------------|--|-------------|---------|-------------|--|-------------|---------|-------------|--|-------------|---------|-------------|--|-------------|---------|-------------|--|-------------|---------|-------------|--|-------------|---------|-------------|--|-------------|---------|-------------|--|-------------|---------|-------------|--|-------------|---------|-------------|--|-------------|---------|-------------|--|-------------|---------|-------------|--|-------------|---------|-------------|--|-------------|---------|-------------|--|-------------|---------|-------------|--|-------------|---------|-------------|--|-------------|---------|-------------|--|-------------|---------|-------------|--|-------------|---------|-------------|--|-------------|---------|-------------|--|-------------|---------|-------------|--|-------------|---------|-------------|--|-------------|---------|-------------|--|-------------|---------|-------------|--|-------------|---------|-------------|--|-------------|---------|-------------|--|-------------|---------|-------------|--|-------------|---------|-------------|--|-------------|---------|-------------|--|-------------|---------|-------------|--|-------------|---------|-------------|--|-------------|---------|-------------|--|-------------|---------|-------------|--|-------------|---------|-------------|--|-------------|---------|-------------|--|-------------|---------|-------------|--|-------------|---------|-------------|--|-------------|---------|-------------|--|-------------|---------|-------------|--|-------------|---------|-------------|--|-------------|---------|-------------|--|-------------|---------|-------------|--|-------------|---------|-------------|--|-------------|---------|-------------|--|-------------|---------|-------------|--|-------------|---------|-------------|--|-------------|---------|-------------|--|-------------|---------|-------------|--|-------------|---------|-------------|--|-------------|---------|-------------|--|-------------|---------|-------------|--|-------------|---------|-------------|--|-------------|---------|-------------|--|-------------|---------|-------------|--|-------------|---------|-------------|--|-------------|---------|-------------|--|-------------|---------|-------------|--|-------------|---------|-------------|--|-------------|---------|-------------|--|-------------|---------|-------------|--|-------------|---------|-------------|--|-------------|---------|-------------|--|-------------|---------|-------------|--|-------------|---------|-------------|--|-------------|---------|-------------|--|-------------|---------|-------------|--|-------------|---------|-------------|--|-------------|---------|-------------|--|-------------|---------|-------------|--|-------------|---------|-------------|--|-------------|---------|-------------|--|-------------|---------|-------------|--|-------------|---------|-------------|--|-------------|---------|-------------|--|-------------|---------|-------------|--|-------------|---------|-------------|--|-------------|---------|-------------|--|-------------|---------|-------------|--|-------------|---------|-------------|--|-------------|---------|-------------|--|-------------|---------|-------------|--|-------------|---------|-------------|--|-------------|---------|-------------|--|-------------|---------|-------------|--|-------------|---------|-------------|--|-------------|---------|-------------|--|-------------|---------|-------------|--|-------------|---------|-------------|--|-------------|---------|-------------|--|-------------|---------|-------------|--|-------------|---------|-------------|--|-------------|---------|-------------|--|-------------|---------|-------------|--|-------------|---------|-------------|--|-------------|---------|-------------|--|-------------|---------|-------------|--|-------------|---------|-------------|--|-------------|---------|-------------|--|-------------|---------|-------------|--|-------------|---------|-------------|--|-------------|---------|-------------|--|-------------|---------|-------------|--|-------------|---------|-------------|--|-------------|---------|-------------|--|-------------|---------|-------------|--|-------------|---------|-------------|--|-------------|---------|-------------|--|-------------|---------|-------------|--|-------------|---------|-------------|--|-------------|---------|-------------|--|-------------|---------|-------------|--|-------------|---------|-------------|--|-------------|---------|-------------|--|-------------|---------|-------------|--|-------------|---------|-------------|--|-------------|---------|-------------|--|-------------|---------|-------------|--|-------------|---------|-------------|--|-------------|---------|-------------|--|-------------|---------|-------------|--|-------------|---------|-------------|--|-------------|---------|-------------|--|-------------|---------|-------------|--|-------------|---------|-------------|--|-------------|---------|-------------|--|-------------|---------|-------------|--|-------------|---------|-------------|--|-------------|---------|-------------|--|-------------|---------|-------------|--|-------------|---------|-------------|--|-------------|---------|-------------|--|-------------|---------|-------------|--|-------------|---------|-------------|--|-------------|---------|-------------|--|-------------|---------|-------------|--|-------------|---------|-------------|--|-------------|---------|-------------|--|-------------|---------|-------------|--|-------------|---------|-------------|--|-------------|---------|-------------|--|-------------|---------|-------------|--|-------------|---------|-------------|--|-------------|---------|-------------|--|-------------|---------|-------------|--|-------------|---------|-------------|--|-------------|---------|-------------|--|-------------|---------|-------------|--|-------------|---------|-------------|--|-------------|---------|-------------|--|-------------|---------|-------------|--|-------------|---------|-------------|--|-------------|---------|-------------|--|-------------|---------|-------------|--|-------------|---------|-------------|--|-------------|---------|-------------|--|-------------|---------|-------------|--|-------------|---------|-------------|--|-------------|---------|-------------|--|-------------|---------|-------------|--|-------------|---------|-------------|
|---------|---------|-------------|--|-------------|---------|-------------|--|-------------|---------|-------------|--|-------------|---------|-------------|--|-------------|---------|-------------|--|-------------|---------|-------------|--|-------------|---------|-------------|--|-------------|---------|-------------|--|-------------|---------|-------------|--|-------------|---------|-------------|--|-------------|---------|-------------|--|-------------|---------|-------------|--|-------------|---------|-------------|--|-------------|---------|-------------|--|-------------|---------|-------------|--|-------------|---------|-------------|--|-------------|---------|-------------|--|-------------|---------|-------------|--|-------------|---------|-------------|--|-------------|---------|-------------|--|-------------|---------|-------------|--|-------------|---------|-------------|--|-------------|---------|-------------|--|-------------|---------|-------------|--|-------------|---------|-------------|--|-------------|---------|-------------|--|-------------|---------|-------------|--|-------------|---------|-------------|--|-------------|---------|-------------|--|-------------|---------|-------------|--|-------------|---------|-------------|--|-------------|---------|-------------|--|-------------|---------|-------------|--|-------------|---------|-------------|--|-------------|---------|-------------|--|-------------|---------|-------------|--|-------------|---------|-------------|--|-------------|---------|-------------|--|-------------|---------|-------------|--|-------------|---------|-------------|--|-------------|---------|-------------|--|-------------|---------|-------------|--|-------------|---------|-------------|--|-------------|---------|-------------|--|-------------|---------|-------------|--|-------------|---------|-------------|--|-------------|---------|-------------|--|-------------|---------|-------------|--|-------------|---------|-------------|--|-------------|---------|-------------|--|-------------|---------|-------------|--|-------------|---------|-------------|--|-------------|---------|-------------|--|-------------|---------|-------------|--|-------------|---------|-------------|--|-------------|---------|-------------|--|-------------|---------|-------------|--|-------------|---------|-------------|--|-------------|---------|-------------|--|-------------|---------|-------------|--|-------------|---------|-------------|--|-------------|---------|-------------|--|-------------|---------|-------------|--|-------------|---------|-------------|--|-------------|---------|-------------|--|-------------|---------|-------------|--|-------------|---------|-------------|--|-------------|---------|-------------|--|-------------|---------|-------------|--|-------------|---------|-------------|--|-------------|---------|-------------|--|-------------|---------|-------------|--|-------------|---------|-------------|--|-------------|---------|-------------|--|-------------|---------|-------------|--|-------------|---------|-------------|--|-------------|---------|-------------|--|-------------|---------|-------------|--|-------------|---------|-------------|--|-------------|---------|-------------|--|-------------|---------|-------------|--|-------------|---------|-------------|--|-------------|---------|-------------|--|-------------|---------|-------------|--|-------------|---------|-------------|--|-------------|---------|-------------|--|-------------|---------|-------------|--|-------------|---------|-------------|--|-------------|---------|-------------|--|-------------|---------|-------------|--|-------------|---------|-------------|--|-------------|---------|-------------|--|-------------|---------|-------------|--|-------------|---------|-------------|--|-------------|---------|-------------|--|-------------|---------|-------------|--|-------------|---------|-------------|--|-------------|---------|-------------|--|-------------|---------|-------------|--|-------------|---------|-------------|--|-------------|---------|-------------|--|-------------|---------|-------------|--|-------------|---------|-------------|--|-------------|---------|-------------|--|-------------|---------|-------------|--|-------------|---------|-------------|--|-------------|---------|-------------|--|-------------|---------|-------------|--|-------------|---------|-------------|--|-------------|---------|-------------|--|-------------|---------|-------------|--|-------------|---------|-------------|--|-------------|---------|-------------|--|-------------|---------|-------------|--|-------------|---------|-------------|--|-------------|---------|-------------|--|-------------|---------|-------------|--|-------------|---------|-------------|--|-------------|---------|-------------|--|-------------|---------|-------------|--|-------------|---------|-------------|--|-------------|---------|-------------|--|-------------|---------|-------------|--|-------------|---------|-------------|--|-------------|---------|-------------|--|-------------|---------|-------------|--|-------------|---------|-------------|--|-------------|---------|-------------|--|-------------|---------|-------------|--|-------------|---------|-------------|--|-------------|---------|-------------|--|-------------|---------|-------------|--|-------------|---------|-------------|--|-------------|---------|-------------|--|-------------|---------|-------------|--|-------------|---------|-------------|--|-------------|---------|-------------|--|-------------|---------|-------------|--|-------------|---------|-------------|--|-------------|---------|-------------|--|-------------|---------|-------------|--|-------------|---------|-------------|--|-------------|---------|-------------|--|-------------|---------|-------------|--|-------------|---------|-------------|--|-------------|---------|-------------|--|-------------|---------|-------------|--|-------------|---------|-------------|--|-------------|---------|-------------|--|-------------|---------|-------------|--|-------------|---------|-------------|--|-------------|---------|-------------|--|-------------|---------|-------------|--|-------------|---------|-------------|--|-------------|---------|-------------|--|-------------|---------|-------------|--|-------------|---------|-------------|--|-------------|---------|-------------|--|-------------|---------|-------------|--|-------------|---------|-------------|--|-------------|---------|-------------|--|-------------|---------|-------------|--|-------------|---------|-------------|--|-------------|---------|-------------|--|-------------|---------|-------------|--|-------------|---------|-------------|--|-------------|---------|-------------|--|-------------|---------|-------------|--|-------------|---------|-------------|--|-------------|---------|-------------|--|-------------|---------|-------------|--|-------------|---------|-------------|--|-------------|---------|-------------|



Journal: Acta Neuropathologica

**Corresponding Author:**

Javad Nazarian, Children's National Medical Center  
111 Michigan Ave, NW, Washington, DC 20010

Phone: 202-476-6022 Fax: 202-476-6014

**Title:** Comparative Multidimensional Molecular Analyses of Pediatric Diffuse Intrinsic Pontine Glioma Reveals Distinct  
**Journal:** Acta Neuropathologica

**Corresponding Author:**  
Eva-Lena Nyman, CHU Health Services, National Public Health Center for Climate Change Medicine

Javad Nazarian, Children's National Medical Center, Center for Genetic Medicine  
111 Michigan Ave., NW, Washington DC, 20010  
Ph: 202-476-6020, Fax: 202-476-6014





**File:** ESM\_10 (On-line Resource)  
**Figure:** Comparative Multidimensional Molecular Analyses of Pelagic Diffuse Intrinsic Yawning Gloms Reveals Distinct Molecular Subtypes

**Authors:** Amanda M. Stransik, Madhuri Kumbhakar, Kendall Snyder, Sidnei Yavitze, Jon Deveney, Brennan Harmon, Jordan Hall, Eric H. Ruabe, Ping An, Melanie Weingart, Brian Ross, Sarah Magee, Roger J. Packer, Javad Nazarian

**Corresponding Author:**  
Javad Nazarian, Children's National Medical Center, Center for Genetic Medicine  
111 Michigan Ave., NW, Washington DC, 20010  
Phone: 202-476-6022 Fax: 202-476-6014  
Email: J.Nazarian@CNMC.org

| Gene ID | P-<br>value[106] | Meanaratio<br>FoldeChange[106] | p-<br>value[110] | Meanaratio<br>FoldeChange[110] | p-<br>value[111] | Meanaratio<br>FoldeChange[111] | p-<br>value[112] | Meanaratio<br>FoldeChange[112] | p-<br>value[121] | Meanaratio<br>FoldeChange[121] | p-<br>value[137] | Meanaratio<br>FoldeChange[137] | p-<br>value[153] | Meanaratio<br>FoldeChange[153] | p-<br>value[157] | Meanaratio<br>FoldeChange[157] | p-<br>value[165] | Meanaratio<br>FoldeChange[165] | p-<br>value[172] | Meanaratio<br>FoldeChange[172] | p-<br>value[180] | Meanaratio<br>FoldeChange[180] | p-<br>value[186] | Meanaratio<br>FoldeChange[186] | p-<br>value[193] | Meanaratio<br>FoldeChange[193] | p-<br>value[199] | Meanaratio<br>FoldeChange[199] | p-<br>value[206] | Meanaratio<br>FoldeChange[206] | p-<br>value[213] | Meanaratio<br>FoldeChange[213] | p-<br>value[220] | Meanaratio<br>FoldeChange[220] | p-<br>value[227] | Meanaratio<br>FoldeChange[227] | p-<br>value[234] | Meanaratio<br>FoldeChange[234] | p-<br>value[241] | Meanaratio<br>FoldeChange[241] | p-<br>value[248] | Meanaratio<br>FoldeChange[248] | p-<br>value[255] | Meanaratio<br>FoldeChange[255] | p-<br>value[262] | Meanaratio<br>FoldeChange[262] | p-<br>value[269] | Meanaratio<br>FoldeChange[269] | p-<br>value[276] | Meanaratio<br>FoldeChange[276] | p-<br>value[283] | Meanaratio<br>FoldeChange[283] | p-<br>value[290] | Meanaratio<br>FoldeChange[290] | p-<br>value[297] | Meanaratio<br>FoldeChange[297] | p-<br>value[304] | Meanaratio<br>FoldeChange[304] | p-<br>value[311] | Meanaratio<br>FoldeChange[311] | p-<br>value[318] | Meanaratio<br>FoldeChange[318] | p-<br>value[325] | Meanaratio<br>FoldeChange[325] | p-<br>value[332] | Meanaratio<br>FoldeChange[332] | p-<br>value[339] | Meanaratio<br>FoldeChange[339] | p-<br>value[346] | Meanaratio<br>FoldeChange[346] | p-<br>value[353] | Meanaratio<br>FoldeChange[353] | p-<br>value[360] | Meanaratio<br>FoldeChange[360] | p-<br>value[367] | Meanaratio<br>FoldeChange[367] | p-<br>value[374] | Meanaratio<br>FoldeChange[374] | p-<br>value[381] | Meanaratio<br>FoldeChange[381] | p-<br>value[388] | Meanaratio<br>FoldeChange[388] | p-<br>value[395] | Meanaratio<br>FoldeChange[395] | p-<br>value[402] | Meanaratio<br>FoldeChange[402] | p-<br>value[409] | Meanaratio<br>FoldeChange[409] | p-<br>value[416] | Meanaratio<br>FoldeChange[416] | p-<br>value[423] | Meanaratio<br>FoldeChange[423] | p-<br>value[430] | Meanaratio<br>FoldeChange[430] | p-<br>value[437] | Meanaratio<br>FoldeChange[437] | p-<br>value[444] | Meanaratio<br>FoldeChange[444] | p-<br>value[451] | Meanaratio<br>FoldeChange[451] | p-<br>value[458] | Meanaratio<br>FoldeChange[458] | p-<br>value[465] | Meanaratio<br>FoldeChange[465] | p-<br>value[472] | Meanaratio<br>FoldeChange[472] | p-<br>value[479] | Meanaratio<br>FoldeChange[479] | p-<br>value[486] | Meanaratio<br>FoldeChange[486] | p-<br>value[493] | Meanaratio<br>FoldeChange[493] | p-<br>value[500] | Meanaratio<br>FoldeChange[500] | p-<br>value[507] | Meanaratio<br>FoldeChange[507] | p-<br>value[514] | Meanaratio<br>FoldeChange[514] | p-<br>value[521] | Meanaratio<br>FoldeChange[521] | p-<br>value[528] | Meanaratio<br>FoldeChange[528] | p-<br>value[535] | Meanaratio<br>FoldeChange[535] | p-<br>value[542] | Meanaratio<br>FoldeChange[542] | p-<br>value[549] | Meanaratio<br>FoldeChange[549] | p-<br>value[556] | Meanaratio<br>FoldeChange[556] | p-<br>value[563] | Meanaratio<br>FoldeChange[563] | p-<br>value[570] | Meanaratio<br>FoldeChange[570] | p-<br>value[577] | Meanaratio<br>FoldeChange[577] | p-<br>value[584] | Meanaratio<br>FoldeChange[584] | p-<br>value[591] | Meanaratio<br>FoldeChange[591] | p-<br>value[598] | Meanaratio<br>FoldeChange[598] | p-<br>value[605] | Meanaratio<br>FoldeChange[605] | p-<br>value[612] | Meanaratio<br>FoldeChange[612] | p-<br>value[619] | Meanaratio<br>FoldeChange[619] | p-<br>value[626] | Meanaratio<br>FoldeChange[626] | p-<br>value[633] | Meanaratio<br>FoldeChange[633] | p-<br>value[640] | Meanaratio<br>FoldeChange[640] | p-<br>value[647] | Meanaratio<br>FoldeChange[647] | p-<br>value[654] | Meanaratio<br>FoldeChange[654] | p-<br>value[661] | Meanaratio<br>FoldeChange[661] | p-<br>value[668] | Meanaratio<br>FoldeChange[668] | p-<br>value[675] | Meanaratio<br>FoldeChange[675] | p-<br>value[682] | Meanaratio<br>FoldeChange[682] | p-<br>value[689] | Meanaratio<br>FoldeChange[689] | p-<br>value[696] | Meanaratio<br>FoldeChange[696] | p-<br>value[703] | Meanaratio<br>FoldeChange[703] | p-<br>value[710] | Meanaratio<br>FoldeChange[710] | p-<br>value[717] | Meanaratio<br>FoldeChange[717] | p-<br>value[724] | Meanaratio<br>FoldeChange[724] | p-<br>value[731] | Meanaratio<br>FoldeChange[731] | p-<br>value[738] | Meanaratio<br>FoldeChange[738] | p-<br>value[745] | Meanaratio<br>FoldeChange[745] | p-<br>value[752] | Meanaratio<br>FoldeChange[752] | p-<br>value[759] | Meanaratio<br>FoldeChange[759] | p-<br>value[766] | Meanaratio<br>FoldeChange[766] | p-<br>value[773] | Meanaratio<br>FoldeChange[773] | p-<br>value[780] | Meanaratio<br>FoldeChange[780] | p-<br>value[787] | Meanaratio<br>FoldeChange[787] | p-<br>value[794] | Meanaratio<br>FoldeChange[794] | p-<br>value[801] | Meanaratio<br>FoldeChange[801] | p-<br>value[808] | Meanaratio<br>FoldeChange[808] | p-<br>value[815] | Meanaratio<br>FoldeChange[815] | p-<br>value[822] | Meanaratio<br>FoldeChange[822] | p-<br>value[829] | Meanaratio<br>FoldeChange[829] | p-<br>value[836] | Meanaratio<br>FoldeChange[836] | p-<br>value[843] | Meanaratio<br>FoldeChange[843] | p-<br>value[850] | Meanaratio<br>FoldeChange[850] | p-<br>value[857] | Meanaratio<br>FoldeChange[857] | p-<br>value[864] | Meanaratio<br>FoldeChange[864] | p-<br>value[871] | Meanaratio<br>FoldeChange[871] | p-<br>value[878] | Meanaratio<br>FoldeChange[878] | p-<br>value[885] | Meanaratio<br>FoldeChange[885] | p-<br>value[892] | Meanaratio<br>FoldeChange[892] | p-<br>value[899] | Meanaratio<br>FoldeChange[899] | p-<br>value[906] | Meanaratio<br>FoldeChange[906] | p-<br>value[913] | Meanaratio<br>FoldeChange[913] | p-<br>value[920] | Meanaratio<br>FoldeChange[920] | p-<br>value[927] | Meanaratio<br>FoldeChange[927] | p-<br>value[934] | Meanaratio<br>FoldeChange[934] | p-<br>value[941] | Meanaratio<br>FoldeChange[941] | p-<br>value[948] | Meanaratio<br>FoldeChange[948] | p-<br>value[955] | Meanaratio<br>FoldeChange[955] | p-<br>value[962] | Meanaratio<br>FoldeChange[962] | p-<br>value[969] | Meanaratio<br>FoldeChange[969] | p-<br>value[976] | Meanaratio<br>FoldeChange[976] | p-<br>value[983] | Meanaratio<br>FoldeChange[983] | p-<br>value[990] | Meanaratio<br>FoldeChange[990] | p-<br>value[997] | Meanaratio<br>FoldeChange[997] | p-<br>value[1004] | Meanaratio<br>FoldeChange[1004] | p-<br>value[1011] | Meanaratio<br>FoldeChange[1011] | p-<br>value[1018] | Meanaratio<br>FoldeChange[1018] | p-<br>value[1025] | Meanaratio<br>FoldeChange[1025] | p-<br>value[1032] | Meanaratio<br>FoldeChange[1032] | p-<br>value[1039] | Meanaratio<br>FoldeChange[1039] | p-<br>value[1046] | Meanaratio<br>FoldeChange[1046] | p-<br>value[1053] | Meanaratio<br>FoldeChange[1053] | p-<br>value[1060] | Meanaratio<br>FoldeChange[1060] | p-<br>value[1067] | Meanaratio<br>FoldeChange[1067] | p-<br>value[1074] | Meanaratio<br>FoldeChange[1074] | p-<br>value[1081] | Meanaratio<br>FoldeChange[1081] | p-<br>value[1088] | Meanaratio<br>FoldeChange[1088] | p-<br>value[1095] | Meanaratio<br>FoldeChange[1095] | p-<br>value[1102] | Meanaratio<br>FoldeChange[1102] | p-<br>value[1109] | Meanaratio<br>FoldeChange[1109] | p-<br>value[1116] | Meanaratio<br>FoldeChange[1116] | p-<br>value[1123] | Meanaratio<br>FoldeChange[1123] | p-<br>value[1130] | Meanaratio<br>FoldeChange[1130] | p-<br>value[1137] | Meanaratio<br>FoldeChange[1137] | p-<br>value[1144] | Meanaratio<br>FoldeChange[1144] | p-<br>value[1151] | Meanaratio<br>FoldeChange[1151] | p-<br>value[1158] | Meanaratio<br>FoldeChange[1158] | p-<br>value[1165] | Meanaratio<br>FoldeChange[1165] | p-<br>value[1172] | Meanaratio<br>FoldeChange[1172] | p-<br>value[1179] | Meanaratio<br>FoldeChange[1179] | p-<br>value[1186] | Meanaratio<br>FoldeChange[1186] | p-<br>value[1193] | Meanaratio<br>FoldeChange[1193] | p-<br>value[1200] | Meanaratio<br>FoldeChange[1200] | p-<br>value[1207] | Meanaratio<br>FoldeChange[1207] | p-<br>value[1214] | Meanaratio<br>FoldeChange[1214] | p-<br>value[1221] | Meanaratio<br>FoldeChange[1221] | p-<br>value[1228] | Meanaratio<br>FoldeChange[1228] | p-<br>value[1235] | Meanaratio<br>FoldeChange[1235] | p-<br>value[1242] | Meanaratio<br>FoldeChange[1242] | p-<br>value[1249] | Meanaratio<br>FoldeChange[1249] | p-<br>value[1256] | Meanaratio<br>FoldeChange[1256] | p-<br>value[1263] | Meanaratio<br>FoldeChange[1263] | p-<br>value[1270] | Meanaratio<br>FoldeChange[1270] | p-<br>value[1277] | Meanaratio<br>FoldeChange[1277] | p-<br>value[1284] | Meanaratio<br>FoldeChange[1284] | p-<br>value[1291] | Meanaratio<br>FoldeChange[1291] | p-<br>value[1298] | Meanaratio<br>FoldeChange[1298] | p-<br>value[1305] | Meanaratio<br>FoldeChange[1305] | p-<br>value[1312] | Meanaratio<br>FoldeChange[1312] | p-<br>value[1319] | Meanaratio<br>FoldeChange[1319] | p-<br>value[1326] | Meanaratio<br>FoldeChange[1326] | p-<br>value[1333] | Meanaratio<br>FoldeChange[1333] | p-<br>value[1340] | Meanaratio<br>FoldeChange[1340] | p-<br>value[1347] | Meanaratio<br>FoldeChange[1347] | p-<br>value[1354] | Meanaratio<br>FoldeChange[1354] | p-<br>value[1361] | Meanaratio<br>FoldeChange[1361] | p-<br>value[1368] | Meanaratio<br>FoldeChange[1368] | p-<br>value[1375] | Meanaratio<br>FoldeChange[1375] | p-<br>value[1382] | Meanaratio<br>FoldeChange[1382] | p-<br>value[1389] | Meanaratio<br>FoldeChange[1389] | p-<br>value[1396] | Meanaratio<br>FoldeChange[1396] | p-<br>value[1403] | Meanaratio<br>FoldeChange[1403] | p-<br>value[1410] | Meanaratio<br>FoldeChange[1410] | p-<br>value[1417] | Meanaratio<br>FoldeChange[1417] | p-<br>value[1424] | Meanaratio<br>FoldeChange[1424] | p-<br>value[1431] | Meanaratio<br>FoldeChange[1431] | p-<br>value[1438] | Meanaratio<br>FoldeChange[1438] | p-<br>value[1445] | Meanaratio<br>FoldeChange[1445] | p-<br>value[1452] | Meanaratio<br>FoldeChange[1452] | p-<br>value[1459] | Meanaratio<br>FoldeChange[1459] | p-<br>value[1466] | Meanaratio<br>FoldeChange[1466] | p-<br>value[1473] | Meanaratio<br>FoldeChange[1473] | p-<br>value[1480] | Meanaratio<br>FoldeChange[1480] | p-<br>value[1487] | Meanaratio<br>FoldeChange[1487] | p-<br>value[1494] | Meanaratio<br>FoldeChange[1494] | p-<br>value[1501] | Meanaratio<br>FoldeChange[1501] | p-<br>value[1508] | Meanaratio<br>FoldeChange[1508] | p-<br>value[1515] | Meanaratio<br>FoldeChange[1515] | p-<br>value[1522] | Meanaratio<br>FoldeChange[1522] | p-<br>value[1529] | Meanaratio<br>FoldeChange[1529] | p-<br>value[1536] | Meanaratio<br>FoldeChange[1536] | p-<br>value[1543] | Meanaratio<br>FoldeChange[1543] | p-<br>value[1550] | Meanaratio<br>FoldeChange[1550] | p-<br>value[1557] | Meanaratio<br>FoldeChange[1557] | p-<br>value[1564] | Meanaratio<br>FoldeChange[1564] | p-<br>value[1571] | Meanaratio<br>FoldeChange[1571] | p-<br>value[1578] | Meanaratio<br>FoldeChange[1578] | p-<br>value[1585] | Meanaratio<br>FoldeChange[1585] | p-<br>value[1592] | Meanaratio<br>FoldeChange[1592] | p-<br>value[1599] | Meanaratio<br>FoldeChange[1599] | p-<br>value[1606] | Meanaratio<br>FoldeChange[1606] | p-<br>value[1613] | Meanaratio<br>FoldeChange[1613] | p-<br>value[1620] | Meanaratio<br>FoldeChange[1620] | p-<br>value[1627] | Meanaratio<br>FoldeChange[1627] | p-<br>value[1634] | Meanaratio<br>FoldeChange[1634] | p-<br>value[1641] | Meanaratio<br>FoldeChange[1641] | p-<br>value[1648] | Meanaratio<br>FoldeChange[1648] | p-<br>value[1655] | Meanaratio<br>FoldeChange[1655] | p-<br>value[1662] | Meanaratio<br>FoldeChange[1662] | p-<br>value[1669] |
|---------|------------------|--------------------------------|------------------|--------------------------------|------------------|--------------------------------|------------------|--------------------------------|------------------|--------------------------------|------------------|--------------------------------|------------------|--------------------------------|------------------|--------------------------------|------------------|--------------------------------|------------------|--------------------------------|------------------|--------------------------------|------------------|--------------------------------|------------------|--------------------------------|------------------|--------------------------------|------------------|--------------------------------|------------------|--------------------------------|------------------|--------------------------------|------------------|--------------------------------|------------------|--------------------------------|------------------|--------------------------------|------------------|--------------------------------|------------------|--------------------------------|------------------|--------------------------------|------------------|--------------------------------|------------------|--------------------------------|------------------|--------------------------------|------------------|--------------------------------|------------------|--------------------------------|------------------|--------------------------------|------------------|--------------------------------|------------------|--------------------------------|------------------|--------------------------------|------------------|--------------------------------|------------------|--------------------------------|------------------|--------------------------------|------------------|--------------------------------|------------------|--------------------------------|------------------|--------------------------------|------------------|--------------------------------|------------------|--------------------------------|------------------|--------------------------------|------------------|--------------------------------|------------------|--------------------------------|------------------|--------------------------------|------------------|--------------------------------|------------------|--------------------------------|------------------|--------------------------------|------------------|--------------------------------|------------------|--------------------------------|------------------|--------------------------------|------------------|--------------------------------|------------------|--------------------------------|------------------|--------------------------------|------------------|--------------------------------|------------------|--------------------------------|------------------|--------------------------------|------------------|--------------------------------|------------------|--------------------------------|------------------|--------------------------------|------------------|--------------------------------|------------------|--------------------------------|------------------|--------------------------------|------------------|--------------------------------|------------------|--------------------------------|------------------|--------------------------------|------------------|--------------------------------|------------------|--------------------------------|------------------|--------------------------------|------------------|--------------------------------|------------------|--------------------------------|------------------|--------------------------------|------------------|--------------------------------|------------------|--------------------------------|------------------|--------------------------------|------------------|--------------------------------|------------------|--------------------------------|------------------|--------------------------------|------------------|--------------------------------|------------------|--------------------------------|------------------|--------------------------------|------------------|--------------------------------|------------------|--------------------------------|------------------|--------------------------------|------------------|--------------------------------|------------------|--------------------------------|------------------|--------------------------------|------------------|--------------------------------|------------------|--------------------------------|------------------|--------------------------------|------------------|--------------------------------|------------------|--------------------------------|------------------|--------------------------------|------------------|--------------------------------|------------------|--------------------------------|------------------|--------------------------------|------------------|--------------------------------|------------------|--------------------------------|------------------|--------------------------------|------------------|--------------------------------|------------------|--------------------------------|------------------|--------------------------------|------------------|--------------------------------|------------------|--------------------------------|------------------|--------------------------------|------------------|--------------------------------|------------------|--------------------------------|------------------|--------------------------------|------------------|--------------------------------|------------------|--------------------------------|------------------|--------------------------------|------------------|--------------------------------|------------------|--------------------------------|------------------|--------------------------------|------------------|--------------------------------|------------------|--------------------------------|------------------|--------------------------------|------------------|--------------------------------|------------------|--------------------------------|------------------|--------------------------------|------------------|--------------------------------|------------------|--------------------------------|------------------|--------------------------------|------------------|--------------------------------|------------------|--------------------------------|------------------|--------------------------------|------------------|--------------------------------|------------------|--------------------------------|------------------|--------------------------------|-------------------|---------------------------------|-------------------|---------------------------------|-------------------|---------------------------------|-------------------|---------------------------------|-------------------|---------------------------------|-------------------|---------------------------------|-------------------|---------------------------------|-------------------|---------------------------------|-------------------|---------------------------------|-------------------|---------------------------------|-------------------|---------------------------------|-------------------|---------------------------------|-------------------|---------------------------------|-------------------|---------------------------------|-------------------|---------------------------------|-------------------|---------------------------------|-------------------|---------------------------------|-------------------|---------------------------------|-------------------|---------------------------------|-------------------|---------------------------------|-------------------|---------------------------------|-------------------|---------------------------------|-------------------|---------------------------------|-------------------|---------------------------------|-------------------|---------------------------------|-------------------|---------------------------------|-------------------|---------------------------------|-------------------|---------------------------------|-------------------|---------------------------------|-------------------|---------------------------------|-------------------|---------------------------------|-------------------|---------------------------------|-------------------|---------------------------------|-------------------|---------------------------------|-------------------|---------------------------------|-------------------|---------------------------------|-------------------|---------------------------------|-------------------|---------------------------------|-------------------|---------------------------------|-------------------|---------------------------------|-------------------|---------------------------------|-------------------|---------------------------------|-------------------|---------------------------------|-------------------|---------------------------------|-------------------|---------------------------------|-------------------|---------------------------------|-------------------|---------------------------------|-------------------|---------------------------------|-------------------|---------------------------------|-------------------|---------------------------------|-------------------|---------------------------------|-------------------|---------------------------------|-------------------|---------------------------------|-------------------|---------------------------------|-------------------|---------------------------------|-------------------|---------------------------------|-------------------|---------------------------------|-------------------|---------------------------------|-------------------|---------------------------------|-------------------|---------------------------------|-------------------|---------------------------------|-------------------|---------------------------------|-------------------|---------------------------------|-------------------|---------------------------------|-------------------|---------------------------------|-------------------|---------------------------------|-------------------|---------------------------------|-------------------|---------------------------------|-------------------|---------------------------------|-------------------|---------------------------------|-------------------|---------------------------------|-------------------|---------------------------------|-------------------|---------------------------------|-------------------|---------------------------------|-------------------|---------------------------------|-------------------|---------------------------------|-------------------|---------------------------------|-------------------|---------------------------------|-------------------|---------------------------------|-------------------|---------------------------------|-------------------|---------------------------------|-------------------|---------------------------------|-------------------|---------------------------------|-------------------|---------------------------------|-------------------|---------------------------------|-------------------|---------------------------------|-------------------|---------------------------------|-------------------|---------------------------------|-------------------|---------------------------------|-------------------|---------------------------------|-------------------|---------------------------------|-------------------|---------------------------------|-------------------|---------------------------------|-------------------|---------------------------------|-------------------|---------------------------------|-------------------|
|---------|------------------|--------------------------------|------------------|--------------------------------|------------------|--------------------------------|------------------|--------------------------------|------------------|--------------------------------|------------------|--------------------------------|------------------|--------------------------------|------------------|--------------------------------|------------------|--------------------------------|------------------|--------------------------------|------------------|--------------------------------|------------------|--------------------------------|------------------|--------------------------------|------------------|--------------------------------|------------------|--------------------------------|------------------|--------------------------------|------------------|--------------------------------|------------------|--------------------------------|------------------|--------------------------------|------------------|--------------------------------|------------------|--------------------------------|------------------|--------------------------------|------------------|--------------------------------|------------------|--------------------------------|------------------|--------------------------------|------------------|--------------------------------|------------------|--------------------------------|------------------|--------------------------------|------------------|--------------------------------|------------------|--------------------------------|------------------|--------------------------------|------------------|--------------------------------|------------------|--------------------------------|------------------|--------------------------------|------------------|--------------------------------|------------------|--------------------------------|------------------|--------------------------------|------------------|--------------------------------|------------------|--------------------------------|------------------|--------------------------------|------------------|--------------------------------|------------------|--------------------------------|------------------|--------------------------------|------------------|--------------------------------|------------------|--------------------------------|------------------|--------------------------------|------------------|--------------------------------|------------------|--------------------------------|------------------|--------------------------------|------------------|--------------------------------|------------------|--------------------------------|------------------|--------------------------------|------------------|--------------------------------|------------------|--------------------------------|------------------|--------------------------------|------------------|--------------------------------|------------------|--------------------------------|------------------|--------------------------------|------------------|--------------------------------|------------------|--------------------------------|------------------|--------------------------------|------------------|--------------------------------|------------------|--------------------------------|------------------|--------------------------------|------------------|--------------------------------|------------------|--------------------------------|------------------|--------------------------------|------------------|--------------------------------|------------------|--------------------------------|------------------|--------------------------------|------------------|--------------------------------|------------------|--------------------------------|------------------|--------------------------------|------------------|--------------------------------|------------------|--------------------------------|------------------|--------------------------------|------------------|--------------------------------|------------------|--------------------------------|------------------|--------------------------------|------------------|--------------------------------|------------------|--------------------------------|------------------|--------------------------------|------------------|--------------------------------|------------------|--------------------------------|------------------|--------------------------------|------------------|--------------------------------|------------------|--------------------------------|------------------|--------------------------------|------------------|--------------------------------|------------------|--------------------------------|------------------|--------------------------------|------------------|--------------------------------|------------------|--------------------------------|------------------|--------------------------------|------------------|--------------------------------|------------------|--------------------------------|------------------|--------------------------------|------------------|--------------------------------|------------------|--------------------------------|------------------|--------------------------------|------------------|--------------------------------|------------------|--------------------------------|------------------|--------------------------------|------------------|--------------------------------|------------------|--------------------------------|------------------|--------------------------------|------------------|--------------------------------|------------------|--------------------------------|------------------|--------------------------------|------------------|--------------------------------|------------------|--------------------------------|------------------|--------------------------------|------------------|--------------------------------|------------------|--------------------------------|------------------|--------------------------------|------------------|--------------------------------|------------------|--------------------------------|------------------|--------------------------------|------------------|--------------------------------|------------------|--------------------------------|------------------|--------------------------------|------------------|--------------------------------|------------------|--------------------------------|------------------|--------------------------------|------------------|--------------------------------|------------------|--------------------------------|------------------|--------------------------------|------------------|--------------------------------|-------------------|---------------------------------|-------------------|---------------------------------|-------------------|---------------------------------|-------------------|---------------------------------|-------------------|---------------------------------|-------------------|---------------------------------|-------------------|---------------------------------|-------------------|---------------------------------|-------------------|---------------------------------|-------------------|---------------------------------|-------------------|---------------------------------|-------------------|---------------------------------|-------------------|---------------------------------|-------------------|---------------------------------|-------------------|---------------------------------|-------------------|---------------------------------|-------------------|---------------------------------|-------------------|---------------------------------|-------------------|---------------------------------|-------------------|---------------------------------|-------------------|---------------------------------|-------------------|---------------------------------|-------------------|---------------------------------|-------------------|---------------------------------|-------------------|---------------------------------|-------------------|---------------------------------|-------------------|---------------------------------|-------------------|---------------------------------|-------------------|---------------------------------|-------------------|---------------------------------|-------------------|---------------------------------|-------------------|---------------------------------|-------------------|---------------------------------|-------------------|---------------------------------|-------------------|---------------------------------|-------------------|---------------------------------|-------------------|---------------------------------|-------------------|---------------------------------|-------------------|---------------------------------|-------------------|---------------------------------|-------------------|---------------------------------|-------------------|---------------------------------|-------------------|---------------------------------|-------------------|---------------------------------|-------------------|---------------------------------|-------------------|---------------------------------|-------------------|---------------------------------|-------------------|---------------------------------|-------------------|---------------------------------|-------------------|---------------------------------|-------------------|---------------------------------|-------------------|---------------------------------|-------------------|---------------------------------|-------------------|---------------------------------|-------------------|---------------------------------|-------------------|---------------------------------|-------------------|---------------------------------|-------------------|---------------------------------|-------------------|---------------------------------|-------------------|---------------------------------|-------------------|---------------------------------|-------------------|---------------------------------|-------------------|---------------------------------|-------------------|---------------------------------|-------------------|---------------------------------|-------------------|---------------------------------|-------------------|---------------------------------|-------------------|---------------------------------|-------------------|---------------------------------|-------------------|---------------------------------|-------------------|---------------------------------|-------------------|---------------------------------|-------------------|---------------------------------|-------------------|---------------------------------|-------------------|---------------------------------|-------------------|---------------------------------|-------------------|---------------------------------|-------------------|---------------------------------|-------------------|---------------------------------|-------------------|---------------------------------|-------------------|---------------------------------|-------------------|---------------------------------|-------------------|---------------------------------|-------------------|---------------------------------|-------------------|---------------------------------|-------------------|---------------------------------|-------------------|---------------------------------|-------------------|---------------------------------|-------------------|---------------------------------|-------------------|---------------------------------|-------------------|---------------------------------|-------------------|---------------------------------|-------------------|---------------------------------|-------------------|---------------------------------|-------------------|---------------------------------|-------------------|

File: ESM\_10 (On-line Resource)

Title: Comparative Multidimensional Molecular Analyses of Pelagic Diffuse Invertebrate Planktonic Groups Reveals Distinct Molecular Subtypes

Journal: Acta Neurologica

Authors: Amanda M. Sontag, Madhuri Kumbharapuri, Kendall Snyder, Sidéni Yavine, Joe Deveney, Brennan Harmon, Jordan Hall, Eric H. Raabe, Ping An, Melanie Weingart, Brian Ross, Sarah Mudge, Roger J. Packer, Javad Nazarian

Corresponding Author:

Javad Nazarian, Children's National Medical Center, Center for Genetic Medicine

111 Michigan Ave., NW, Washington DC, 20010

Phone: 202-476-0022 Fax: 202-476-6014

Email: J.Nazarian@CNMCC.org

| Gene ID | P-<br>value[106] | MeanRatio<br>(106 vs. n) | FoldChange[106] | P-<br>value[111] | MeanRatio<br>(111 vs. n) | FoldChange[111] | P-<br>value[112] | MeanRatio<br>(112 vs. n) | FoldChange[112] | P-<br>value[121] | MeanRatio<br>(121 vs. n) | FoldChange[121] | P-<br>value[147] | MeanRatio<br>(147 vs. n) | FoldChange[147] | P-<br>value[153] | MeanRatio<br>(153 vs. n) | FoldChange[153] | P-<br>value[157] | MeanRatio<br>(157 vs. n) | FoldChange[157] | P-<br>value[165] | MeanRatio<br>(165 vs. n) | FoldChange[165] | P-<br>value[170] | MeanRatio<br>(170 vs. n) | FoldChange[170] | P-<br>value[171] | MeanRatio<br>(171 vs. n) | FoldChange[171] | P-<br>value[172] | MeanRatio<br>(172 vs. n) | FoldChange[172] | P-<br>value[173] | MeanRatio<br>(173 vs. n) | FoldChange[173] | P-<br>value[174] | MeanRatio<br>(174 vs. n) | FoldChange[174] | P-<br>value[175] | MeanRatio<br>(175 vs. n) | FoldChange[175] | P-<br>value[176] | MeanRatio<br>(176 vs. n) | FoldChange[176] | P-<br>value[177] | MeanRatio<br>(177 vs. n) | FoldChange[177] | P-<br>value[178] | MeanRatio<br>(178 vs. n) | FoldChange[178] | P-<br>value[179] | MeanRatio<br>(179 vs. n) | FoldChange[179] | P-<br>value[180] | MeanRatio<br>(180 vs. n) | FoldChange[180] | P-<br>value[181] | MeanRatio<br>(181 vs. n) | FoldChange[181] | P-<br>value[182] | MeanRatio<br>(182 vs. n) | FoldChange[182] | P-<br>value[183] | MeanRatio<br>(183 vs. n) | FoldChange[183] | P-<br>value[184] | MeanRatio<br>(184 vs. n) | FoldChange[184] | P-<br>value[185] | MeanRatio<br>(185 vs. n) | FoldChange[185] | P-<br>value[186] | MeanRatio<br>(186 vs. n) | FoldChange[186] | P-<br>value[187] | MeanRatio<br>(187 vs. n) | FoldChange[187] | P-<br>value[188] | MeanRatio<br>(188 vs. n) | FoldChange[188] | P-<br>value[189] | MeanRatio<br>(189 vs. n) | FoldChange[189] | P-<br>value[190] | MeanRatio<br>(190 vs. n) | FoldChange[190] | P-<br>value[191] | MeanRatio<br>(191 vs. n) | FoldChange[191] | P-<br>value[192] | MeanRatio<br>(192 vs. n) | FoldChange[192] | P-<br>value[193] | MeanRatio<br>(193 vs. n) | FoldChange[193] | P-<br>value[194] | MeanRatio<br>(194 vs. n) | FoldChange[194] | P-<br>value[195] | MeanRatio<br>(195 vs. n) | FoldChange[195] | P-<br>value[196] | MeanRatio<br>(196 vs. n) | FoldChange[196] | P-<br>value[197] | MeanRatio<br>(197 vs. n) | FoldChange[197] | P-<br>value[198] | MeanRatio<br>(198 vs. n) | FoldChange[198] | P-<br>value[199] | MeanRatio<br>(199 vs. n) | FoldChange[199] | P-<br>value[200] | MeanRatio<br>(200 vs. n) | FoldChange[200] | P-<br>value[201] | MeanRatio<br>(201 vs. n) | FoldChange[201] | P-<br>value[202] | MeanRatio<br>(202 vs. n) | FoldChange[202] | P-<br>value[203] | MeanRatio<br>(203 vs. n) | FoldChange[203] | P-<br>value[204] | MeanRatio<br>(204 vs. n) | FoldChange[204] | P-<br>value[205] | MeanRatio<br>(205 vs. n) | FoldChange[205] | P-<br>value[206] | MeanRatio<br>(206 vs. n) | FoldChange[206] | P-<br>value[207] | MeanRatio<br>(207 vs. n) | FoldChange[207] | P-<br>value[208] | MeanRatio<br>(208 vs. n) | FoldChange[208] | P-<br>value[209] | MeanRatio<br>(209 vs. n) | FoldChange[209] | P-<br>value[210] | MeanRatio<br>(210 vs. n) | FoldChange[210] | P-<br>value[211] | MeanRatio<br>(211 vs. n) | FoldChange[211] | P-<br>value[212] | MeanRatio<br>(212 vs. n) | FoldChange[212] | P-<br>value[213] | MeanRatio<br>(213 vs. n) | FoldChange[213] | P-<br>value[214] | MeanRatio<br>(214 vs. n) | FoldChange[214] | P-<br>value[215] | MeanRatio<br>(215 vs. n) | FoldChange[215] | P-<br>value[216] | MeanRatio<br>(216 vs. n) | FoldChange[216] | P-<br>value[217] | MeanRatio<br>(217 vs. n) | FoldChange[217] | P-<br>value[218] | MeanRatio<br>(218 vs. n) | FoldChange[218] | P-<br>value[219] | MeanRatio<br>(219 vs. n) | FoldChange[219] | P-<br>value[220] | MeanRatio<br>(220 vs. n) | FoldChange[220] | P-<br>value[221] | MeanRatio<br>(221 vs. n) | FoldChange[221] | P-<br>value[222] | MeanRatio<br>(222 vs. n) | FoldChange[222] | P-<br>value[223] | MeanRatio<br>(223 vs. n) | FoldChange[223] | P-<br>value[224] | MeanRatio<br>(224 vs. n) | FoldChange[224] | P-<br>value[225] | MeanRatio<br>(225 vs. n) | FoldChange[225] | P-<br>value[226] | MeanRatio<br>(226 vs. n) | FoldChange[226] | P-<br>value[227] | MeanRatio<br>(227 vs. n) | FoldChange[227] | P-<br>value[228] | MeanRatio<br>(228 vs. n) | FoldChange[228] | P-<br>value[229] | MeanRatio<br>(229 vs. n) | FoldChange[229] | P-<br>value[230] | MeanRatio<br>(230 vs. n) | FoldChange[230] | P-<br>value[231] | MeanRatio<br>(231 vs. n) | FoldChange[231] | P-<br>value[232] | MeanRatio<br>(232 vs. n) | FoldChange[232] | P-<br>value[233] | MeanRatio<br>(233 vs. n) | FoldChange[233] | P-<br>value[234] | MeanRatio<br>(234 vs. n) | FoldChange[234] | P-<br>value[235] | MeanRatio<br>(235 vs. n) | FoldChange[235] | P-<br>value[236] | MeanRatio<br>(236 vs. n) | FoldChange[236] | P-<br>value[237] | MeanRatio<br>(237 vs. n) | FoldChange[237] | P-<br>value[238] | MeanRatio<br>(238 vs. n) | FoldChange[238] | P-<br>value[239] | MeanRatio<br>(239 vs. n) | FoldChange[239] | P-<br>value[240] | MeanRatio<br>(240 vs. n) | FoldChange[240] | P-<br>value[241] | MeanRatio<br>(241 vs. n) | FoldChange[241] | P-<br>value[242] | MeanRatio<br>(242 vs. n) | FoldChange[242] | P-<br>value[243] | MeanRatio<br>(243 vs. n) | FoldChange[243] | P-<br>value[244] | MeanRatio<br>(244 vs. n) | FoldChange[244] | P-<br>value[245] | MeanRatio<br>(245 vs. n) | FoldChange[245] | P-<br>value[246] | MeanRatio<br>(246 vs. n) | FoldChange[246] | P-<br>value[247] | MeanRatio<br>(247 vs. n) | FoldChange[247] | P-<br>value[248] | MeanRatio<br>(248 vs. n) | FoldChange[248] | P-<br>value[249] | MeanRatio<br>(249 vs. n) | FoldChange[249] | P-<br>value[250] | MeanRatio<br>(250 vs. n) | FoldChange[250] | P-<br>value[251] | MeanRatio<br>(251 vs. n) | FoldChange[251] | P-<br>value[252] | MeanRatio<br>(252 vs. n) | FoldChange[252] | P-<br>value[253] | MeanRatio<br>(253 vs. n) | FoldChange[253] | P-<br>value[254] | MeanRatio<br>(254 vs. n) | FoldChange[254] | P-<br>value[255] | MeanRatio<br>(255 vs. n) | FoldChange[255] | P-<br>value[256] | MeanRatio<br>(256 vs. n) | FoldChange[256] | P-<br>value[257] | MeanRatio<br>(257 vs. n) | FoldChange[257] | P-<br>value[258] | MeanRatio<br>(258 vs. n) | FoldChange[258] | P-<br>value[259] | MeanRatio<br>(259 vs. n) | FoldChange[259] | P-<br>value[260] | MeanRatio<br>(260 vs. n) | FoldChange[260] | P-<br>value[261] | MeanRatio<br>(261 vs. n) | FoldChange[261] | P-<br>value[262] | MeanRatio<br>(262 vs. n) | FoldChange[262] | P-<br>value[263] | MeanRatio<br>(263 vs. n) | FoldChange[263] | P-<br>value[264] | MeanRatio<br>(264 vs. n) | FoldChange[264] | P-<br>value[265] | MeanRatio<br>(265 vs. n) | FoldChange[265] | P-<br>value[266] | MeanRatio<br>(266 vs. n) | FoldChange[266] | P-<br>value[267] | MeanRatio<br>(267 vs. n) | FoldChange[267] | P-<br>value[268] | MeanRatio<br>(268 vs. n) | FoldChange[268] | P-<br>value[269] | MeanRatio<br>(269 vs. n) | FoldChange[269] | P-<br>value[270] | MeanRatio<br>(270 vs. n) | FoldChange[270] | P-<br>value[271] | MeanRatio<br>(271 vs. n) | FoldChange[271] | P-<br>value[272] | MeanRatio<br>(272 vs. n) | FoldChange[272] | P-<br>value[273] | MeanRatio<br>(273 vs. n) | FoldChange[273] | P-<br>value[274] | MeanRatio<br>(274 vs. n) | FoldChange[274] | P-<br>value[275] | MeanRatio<br>(275 vs. n) | FoldChange[275] | P-<br>value[276] | MeanRatio<br>(276 vs. n) | FoldChange[276] | P-<br>value[277] | MeanRatio<br>(277 vs. n) | FoldChange[277] | P-<br>value[278] | MeanRatio<br>(278 vs. n) | FoldChange[278] | P-<br>value[279] | MeanRatio<br>(279 vs. n) | FoldChange[279] | P-<br>value[280] | MeanRatio<br>(280 vs. n) | FoldChange[280] | P-<br>value[281] | MeanRatio<br>(281 vs. n) | FoldChange[281] | P-<br>value[282] | MeanRatio<br>(282 vs. n) | FoldChange[282] | P-<br>value[283] | MeanRatio<br>(283 vs. n) | FoldChange[283] | P-<br>value[284] | MeanRatio<br>(284 vs. n) | FoldChange[284] | P-<br>value[285] | MeanRatio<br>(285 vs. n) | FoldChange[285] | P-<br>value[286] | MeanRatio<br>(286 vs. n) | FoldChange[286] | P-<br>value[287] | MeanRatio<br>(287 vs. n) | FoldChange[287] | P-<br>value[288] | MeanRatio<br>(288 vs. n) | FoldChange[288] | P-<br>value[289] | MeanRatio<br>(289 vs. n) | FoldChange[289] | P-<br>value[290] | MeanRatio<br>(290 vs. n) | FoldChange[290] | P-<br>value[291] | MeanRatio<br>(291 vs. n) | FoldChange[291] | P-<br>value[292] | MeanRatio<br>(292 vs. n) | FoldChange[292] | P-<br>value[293] | MeanRatio<br>(293 vs. n) | FoldChange[293] | P-<br>value[294] | MeanRatio<br>(294 vs. n) | FoldChange[294] | P-<br>value[295] | MeanRatio<br>(295 vs. n) | FoldChange[295] | P-<br>value[296] | MeanRatio<br>(296 vs. n) | FoldChange[296] | P-<br>value[297] | MeanRatio<br>(297 vs. n) | FoldChange[297] | P-<br>value[298] | MeanRatio<br>(298 vs. n) | FoldChange[298] | P-<br>value[299] | MeanRatio<br>(299 vs. n) | FoldChange[299] | P-<br>value[300] | MeanRatio<br>(300 vs. n) | FoldChange[300] | P-<br>value[301] | MeanRatio<br>(301 vs. n) | FoldChange[301] | P-<br>value[302] | MeanRatio<br>(302 vs. n) | FoldChange[302] | P-<br>value[303] | MeanRatio<br>(303 vs. n) | FoldChange[303] | P-<br>value[304] | MeanRatio<br>(304 vs. n) | FoldChange[304] | P-<br>value[305] | MeanRatio<br>(305 vs. n) | FoldChange[305] | P-<br>value[306] | MeanRatio<br>(306 vs. n) | FoldChange[306] | P-<br>value[307] | MeanRatio<br>(307 vs. n) | FoldChange[307] | P-<br>value[308] | MeanRatio<br>(308 vs. n) | FoldChange[308] | P-<br>value[309] | MeanRatio<br>(309 vs. n) | FoldChange[309] | P-<br>value[310] | MeanRatio<br>(310 vs. n) | FoldChange[310] | P-<br>value[311] | MeanRatio<br>(311 vs. n) | FoldChange[311] | P-<br>value[312] | MeanRatio<br>(312 vs. n) | FoldChange[312] | P-<br>value[313] | MeanRatio<br>(313 vs. n) | FoldChange[313] | P-<br>value[314] | MeanRatio<br>(314 vs. n) | FoldChange[314] | P-<br>value[315] | MeanRatio<br>(315 vs. n) | FoldChange[315] | P-<br>value[316] | MeanRatio<br>(316 vs. n) | FoldChange[316] | P-<br>value[317] | MeanRatio<br>(317 vs. n) | FoldChange[317] | P-<br>value[318] | MeanRatio<br>(318 vs. n) | FoldChange[318] | P-<br>value[319] | MeanRatio<br>(319 vs. n) | FoldChange[319] | P-<br>value[320] | MeanRatio<br>(320 vs. n) | FoldChange[320] | P-<br>value[321] | MeanRatio<br>(321 vs. n) | FoldChange[321] | P-<br>value[322] | MeanRatio<br>(322 vs. n) | FoldChange[322] | P-<br>value[323] | MeanRatio<br>(323 vs. n) | FoldChange[323] | P-<br>value[324] | MeanRatio<br>(324 vs. n) | FoldChange[324] | P-<br>value[325] | MeanRatio<br>(325 vs. n) | FoldChange[325] | P-<br>value[326] | MeanRatio<br>(326 vs. n) |
|---------|------------------|--------------------------|-----------------|------------------|--------------------------|-----------------|------------------|--------------------------|-----------------|------------------|--------------------------|-----------------|------------------|--------------------------|-----------------|------------------|--------------------------|-----------------|------------------|--------------------------|-----------------|------------------|--------------------------|-----------------|------------------|--------------------------|-----------------|------------------|--------------------------|-----------------|------------------|--------------------------|-----------------|------------------|--------------------------|-----------------|------------------|--------------------------|-----------------|------------------|--------------------------|-----------------|------------------|--------------------------|-----------------|------------------|--------------------------|-----------------|------------------|--------------------------|-----------------|------------------|--------------------------|-----------------|------------------|--------------------------|-----------------|------------------|--------------------------|-----------------|------------------|--------------------------|-----------------|------------------|--------------------------|-----------------|------------------|--------------------------|-----------------|------------------|--------------------------|-----------------|------------------|--------------------------|-----------------|------------------|--------------------------|-----------------|------------------|--------------------------|-----------------|------------------|--------------------------|-----------------|------------------|--------------------------|-----------------|------------------|--------------------------|-----------------|------------------|--------------------------|-----------------|------------------|--------------------------|-----------------|------------------|--------------------------|-----------------|------------------|--------------------------|-----------------|------------------|--------------------------|-----------------|------------------|--------------------------|-----------------|------------------|--------------------------|-----------------|------------------|--------------------------|-----------------|------------------|--------------------------|-----------------|------------------|--------------------------|-----------------|------------------|--------------------------|-----------------|------------------|--------------------------|-----------------|------------------|--------------------------|-----------------|------------------|--------------------------|-----------------|------------------|--------------------------|-----------------|------------------|--------------------------|-----------------|------------------|--------------------------|-----------------|------------------|--------------------------|-----------------|------------------|--------------------------|-----------------|------------------|--------------------------|-----------------|------------------|--------------------------|-----------------|------------------|--------------------------|-----------------|------------------|--------------------------|-----------------|------------------|--------------------------|-----------------|------------------|--------------------------|-----------------|------------------|--------------------------|-----------------|------------------|--------------------------|-----------------|------------------|--------------------------|-----------------|------------------|--------------------------|-----------------|------------------|--------------------------|-----------------|------------------|--------------------------|-----------------|------------------|--------------------------|-----------------|------------------|--------------------------|-----------------|------------------|--------------------------|-----------------|------------------|--------------------------|-----------------|------------------|--------------------------|-----------------|------------------|--------------------------|-----------------|------------------|--------------------------|-----------------|------------------|--------------------------|-----------------|------------------|--------------------------|-----------------|------------------|--------------------------|-----------------|------------------|--------------------------|-----------------|------------------|--------------------------|-----------------|------------------|--------------------------|-----------------|------------------|--------------------------|-----------------|------------------|--------------------------|-----------------|------------------|--------------------------|-----------------|------------------|--------------------------|-----------------|------------------|--------------------------|-----------------|------------------|--------------------------|-----------------|------------------|--------------------------|-----------------|------------------|--------------------------|-----------------|------------------|--------------------------|-----------------|------------------|--------------------------|-----------------|------------------|--------------------------|-----------------|------------------|--------------------------|-----------------|------------------|--------------------------|-----------------|------------------|--------------------------|-----------------|------------------|--------------------------|-----------------|------------------|--------------------------|-----------------|------------------|--------------------------|-----------------|------------------|--------------------------|-----------------|------------------|--------------------------|-----------------|------------------|--------------------------|-----------------|------------------|--------------------------|-----------------|------------------|--------------------------|-----------------|------------------|--------------------------|-----------------|------------------|--------------------------|-----------------|------------------|--------------------------|-----------------|------------------|--------------------------|-----------------|------------------|--------------------------|-----------------|------------------|--------------------------|-----------------|------------------|--------------------------|-----------------|------------------|--------------------------|-----------------|------------------|--------------------------|-----------------|------------------|--------------------------|-----------------|------------------|--------------------------|-----------------|------------------|--------------------------|-----------------|------------------|--------------------------|-----------------|------------------|--------------------------|-----------------|------------------|--------------------------|-----------------|------------------|--------------------------|-----------------|------------------|--------------------------|-----------------|------------------|--------------------------|-----------------|------------------|--------------------------|-----------------|------------------|--------------------------|-----------------|------------------|--------------------------|-----------------|------------------|--------------------------|-----------------|------------------|--------------------------|-----------------|------------------|--------------------------|-----------------|------------------|--------------------------|-----------------|------------------|--------------------------|-----------------|------------------|--------------------------|-----------------|------------------|--------------------------|-----------------|------------------|--------------------------|-----------------|------------------|--------------------------|-----------------|------------------|--------------------------|-----------------|------------------|--------------------------|-----------------|------------------|--------------------------|-----------------|------------------|--------------------------|-----------------|------------------|--------------------------|-----------------|------------------|--------------------------|-----------------|------------------|--------------------------|-----------------|------------------|--------------------------|-----------------|------------------|--------------------------|-----------------|------------------|--------------------------|-----------------|------------------|--------------------------|-----------------|------------------|--------------------------|-----------------|------------------|--------------------------|-----------------|------------------|--------------------------|-----------------|------------------|--------------------------|-----------------|------------------|--------------------------|-----------------|------------------|--------------------------|-----------------|------------------|--------------------------|-----------------|------------------|--------------------------|-----------------|------------------|--------------------------|-----------------|------------------|--------------------------|-----------------|------------------|--------------------------|-----------------|------------------|--------------------------|-----------------|------------------|--------------------------|-----------------|------------------|--------------------------|-----------------|------------------|--------------------------|-----------------|------------------|--------------------------|-----------------|------------------|--------------------------|-----------------|------------------|--------------------------|-----------------|------------------|--------------------------|-----------------|------------------|--------------------------|-----------------|------------------|--------------------------|-----------------|------------------|--------------------------|-----------------|------------------|--------------------------|-----------------|------------------|--------------------------|-----------------|------------------|--------------------------|-----------------|------------------|--------------------------|-----------------|------------------|--------------------------|-----------------|------------------|--------------------------|
|---------|------------------|--------------------------|-----------------|------------------|--------------------------|-----------------|------------------|--------------------------|-----------------|------------------|--------------------------|-----------------|------------------|--------------------------|-----------------|------------------|--------------------------|-----------------|------------------|--------------------------|-----------------|------------------|--------------------------|-----------------|------------------|--------------------------|-----------------|------------------|--------------------------|-----------------|------------------|--------------------------|-----------------|------------------|--------------------------|-----------------|------------------|--------------------------|-----------------|------------------|--------------------------|-----------------|------------------|--------------------------|-----------------|------------------|--------------------------|-----------------|------------------|--------------------------|-----------------|------------------|--------------------------|-----------------|------------------|--------------------------|-----------------|------------------|--------------------------|-----------------|------------------|--------------------------|-----------------|------------------|--------------------------|-----------------|------------------|--------------------------|-----------------|------------------|--------------------------|-----------------|------------------|--------------------------|-----------------|------------------|--------------------------|-----------------|------------------|--------------------------|-----------------|------------------|--------------------------|-----------------|------------------|--------------------------|-----------------|------------------|--------------------------|-----------------|------------------|--------------------------|-----------------|------------------|--------------------------|-----------------|------------------|--------------------------|-----------------|------------------|--------------------------|-----------------|------------------|--------------------------|-----------------|------------------|--------------------------|-----------------|------------------|--------------------------|-----------------|------------------|--------------------------|-----------------|------------------|--------------------------|-----------------|------------------|--------------------------|-----------------|------------------|--------------------------|-----------------|------------------|--------------------------|-----------------|------------------|--------------------------|-----------------|------------------|--------------------------|-----------------|------------------|--------------------------|-----------------|------------------|--------------------------|-----------------|------------------|--------------------------|-----------------|------------------|--------------------------|-----------------|------------------|--------------------------|-----------------|------------------|--------------------------|-----------------|------------------|--------------------------|-----------------|------------------|--------------------------|-----------------|------------------|--------------------------|-----------------|------------------|--------------------------|-----------------|------------------|--------------------------|-----------------|------------------|--------------------------|-----------------|------------------|--------------------------|-----------------|------------------|--------------------------|-----------------|------------------|--------------------------|-----------------|------------------|--------------------------|-----------------|------------------|--------------------------|-----------------|------------------|--------------------------|-----------------|------------------|--------------------------|-----------------|------------------|--------------------------|-----------------|------------------|--------------------------|-----------------|------------------|--------------------------|-----------------|------------------|--------------------------|-----------------|------------------|--------------------------|-----------------|------------------|--------------------------|-----------------|------------------|--------------------------|-----------------|------------------|--------------------------|-----------------|------------------|--------------------------|-----------------|------------------|--------------------------|-----------------|------------------|--------------------------|-----------------|------------------|--------------------------|-----------------|------------------|--------------------------|-----------------|------------------|--------------------------|-----------------|------------------|--------------------------|-----------------|------------------|--------------------------|-----------------|------------------|--------------------------|-----------------|------------------|--------------------------|-----------------|------------------|--------------------------|-----------------|------------------|--------------------------|-----------------|------------------|--------------------------|-----------------|------------------|--------------------------|-----------------|------------------|--------------------------|-----------------|------------------|--------------------------|-----------------|------------------|--------------------------|-----------------|------------------|--------------------------|-----------------|------------------|--------------------------|-----------------|------------------|--------------------------|-----------------|------------------|--------------------------|-----------------|------------------|--------------------------|-----------------|------------------|--------------------------|-----------------|------------------|--------------------------|-----------------|------------------|--------------------------|-----------------|------------------|--------------------------|-----------------|------------------|--------------------------|-----------------|------------------|--------------------------|-----------------|------------------|--------------------------|-----------------|------------------|--------------------------|-----------------|------------------|--------------------------|-----------------|------------------|--------------------------|-----------------|------------------|--------------------------|-----------------|------------------|--------------------------|-----------------|------------------|--------------------------|-----------------|------------------|--------------------------|-----------------|------------------|--------------------------|-----------------|------------------|--------------------------|-----------------|------------------|--------------------------|-----------------|------------------|--------------------------|-----------------|------------------|--------------------------|-----------------|------------------|--------------------------|-----------------|------------------|--------------------------|-----------------|------------------|--------------------------|-----------------|------------------|--------------------------|-----------------|------------------|--------------------------|-----------------|------------------|--------------------------|-----------------|------------------|--------------------------|-----------------|------------------|--------------------------|-----------------|------------------|--------------------------|-----------------|------------------|--------------------------|-----------------|------------------|--------------------------|-----------------|------------------|--------------------------|-----------------|------------------|--------------------------|-----------------|------------------|--------------------------|-----------------|------------------|--------------------------|-----------------|------------------|--------------------------|-----------------|------------------|--------------------------|-----------------|------------------|--------------------------|-----------------|------------------|--------------------------|-----------------|------------------|--------------------------|-----------------|------------------|--------------------------|-----------------|------------------|--------------------------|-----------------|------------------|--------------------------|-----------------|------------------|--------------------------|-----------------|------------------|--------------------------|-----------------|------------------|--------------------------|-----------------|------------------|--------------------------|-----------------|------------------|--------------------------|-----------------|------------------|--------------------------|-----------------|------------------|--------------------------|-----------------|------------------|--------------------------|-----------------|------------------|--------------------------|-----------------|------------------|--------------------------|-----------------|------------------|--------------------------|-----------------|------------------|--------------------------|-----------------|------------------|--------------------------|-----------------|------------------|--------------------------|-----------------|------------------|--------------------------|-----------------|------------------|--------------------------|-----------------|------------------|--------------------------|-----------------|------------------|--------------------------|-----------------|------------------|--------------------------|-----------------|------------------|--------------------------|-----------------|------------------|--------------------------|-----------------|------------------|--------------------------|-----------------|------------------|--------------------------|-----------------|------------------|--------------------------|-----------------|------------------|--------------------------|-----------------|------------------|--------------------------|-----------------|------------------|--------------------------|-----------------|------------------|--------------------------|-----------------|------------------|--------------------------|-----------------|------------------|--------------------------|



File: ESM\_10 (Online Resource 10)

Title: Comparative Multidimensional Molecular Analyses of Pediatric Diffuse Intrinsic Glioma Reveals Distinct Molecular Subtypes

Journal: Acta Neuropathologica

Authors: Amanda M. Stransik, Madhuri Kumbhakar, Kendall Snyder, Sidicki Yavuzli, Joe Devenney,

Breanna Harmon, Jordan Hall, Eric H. Raabe, Ping An, Melanie Weingart, Brian Ross, Sarah Magee, Roger J. Packer, Javad Nazarian

Corresponding Author:

Javad Nazarian, Children's National Medical Center, Center for Genetic Medicine,

111 Michigan Ave., NW, Washington DC, 20010

Phone: 202-476-6022 Fax: 202-476-6014

Email: J.Nazarian@CNMC.org

| Gene ID | p-<br>value[106] | Meanaratio<br>(106 vs. n) | FoldChange[106] | p-<br>value[111] | Meanaratio<br>(111 vs. n) | FoldChange[111] | p-<br>value[112] | Meanaratio<br>(112 vs. n) | FoldChange[112] | p-<br>value[121] | Meanaratio<br>(121 vs. n) | FoldChange[121] | p-<br>value[137] | Meanaratio<br>(137 vs. n) | FoldChange[137] | p-<br>value[153] | Meanaratio<br>(153 vs. n) | FoldChange[153] | p-<br>value[157] | Meanaratio<br>(157 vs. n) | FoldChange[157] | p-<br>value[165] | Meanaratio<br>(165 vs. n) | FoldChange[165] | p-<br>value[170] | Meanaratio<br>(170 vs. n) | FoldChange[170] | FPRD  | SMPD | S50RER    | FPRER    |               |       |      |
|---------|------------------|---------------------------|-----------------|------------------|---------------------------|-----------------|------------------|---------------------------|-----------------|------------------|---------------------------|-----------------|------------------|---------------------------|-----------------|------------------|---------------------------|-----------------|------------------|---------------------------|-----------------|------------------|---------------------------|-----------------|------------------|---------------------------|-----------------|-------|------|-----------|----------|---------------|-------|------|
|         |                  |                           |                 |                  |                           |                 |                  |                           |                 |                  |                           |                 |                  |                           |                 |                  |                           |                 |                  |                           |                 |                  |                           |                 |                  |                           |                 |       |      |           |          |               |       |      |
| 15415   | 0                | -0.210881                 | -4.74202        | 106 down vs n    | 0.101374                  | 10.1374         | 111 up vs n      | 1.376                     | 1.38            | 0.01846          | 1.0846                    | 121 down vs n   | 1.406            | 1.41                      | 0.01846         | 1.0846           | 137 down vs n             | 1.406           | 1.41             | 0.01846                   | 1.0846          | 153 down vs n    | 1.406                     | 1.41            | 0.01846          | 1.0846                    | 157 down vs n   | 1.406 | 1.41 | 0.01846   | 1.0846   | 170 down vs n | 1.406 | 1.41 |
| 15416   | 0                | 0.360809                  | 2.71688         | 106 down vs n    | 0.156512                  | 1.5651          | 111 up vs n      | 1.2536                    | 1.25            | 0.38058          | 2.58078                   | 121 down vs n   | 0                | 0                         | 0.38058         | 2.58078          | 137 down vs n             | 0               | 0                | 0.38058                   | 2.58078         | 153 down vs n    | 0                         | 0               | 0.38058          | 2.58078                   | 157 down vs n   | 0     | 0    | 0.38058   | 2.58078  | 170 down vs n | 0     | 0    |
| 15417   | 0                | -0.20842                  | -2.08442        | 106 up vs n      | 0.388906                  | 3.88906         | 111 up vs n      | 0                         | 0               | 0.256758         | -3.88906                  | 121 down vs n   | 0                | 0                         | 0.256758        | -3.88906         | 137 down vs n             | 0               | 0                | 0.256758                  | -3.88906        | 153 down vs n    | 0                         | 0               | 0.256758         | -3.88906                  | 157 down vs n   | 0     | 0    | 0.256758  | -3.88906 | 170 down vs n | 0     | 0    |
| 15418   | 0                | 0.555617                  | -1.7998         | 106 down vs n    | 0.24318                   | 2.4318          | 111 up vs n      | 0                         | 0               | 0.59775          | 1.59775                   | 121 up vs n     | 0                | 0                         | 0.207962        | -4.80856         | 121 down vs n             | 0               | 0                | 0.207962                  | -4.80856        | 137 down vs n    | 0                         | 0               | 0.207962         | -4.80856                  | 153 down vs n   | 0     | 0    | 0.207962  | -4.80856 | 157 down vs n | 0     | 0    |
| 15419   | 0                | 0.162022                  | -6.16554        | 106 down vs n    | 0.12927                   | 1.2927          | 111 up vs n      | 0                         | 0               | 0.52384          | 6.52384                   | 121 down vs n   | 0                | 0                         | 0.444804        | -2.4773          | 121 down vs n             | 0               | 0                | 0.444804                  | -2.4773         | 137 down vs n    | 0                         | 0               | 0.444804         | -2.4773                   | 153 down vs n   | 0     | 0    | 0.444804  | -2.4773  | 157 down vs n | 0     | 0    |
| 15420   | 4.76E-44         | 0.573727                  | -1.85968        | 106 down vs n    | 0.324061                  | 3.24061         | 111 up vs n      | 0                         | 0               | 0.95175          | 1.95175                   | 121 up vs n     | 0                | 0                         | -0.499192       | -0.00324         | 121 down vs n             | 0               | 0                | -0.499192                 | -0.00324        | 137 down vs n    | 0                         | 0               | -0.499192        | -0.00324                  | 153 down vs n   | 0     | 0    | -0.499192 | -0.00324 | 157 down vs n | 0     | 0    |
| 15421   | 0                | 8.12489                   | 8.12489         | 106 up vs n      | 0.22294                   | 2.2294          | 111 up vs n      | 0                         | 0               | -4.56118         | 4.56118                   | 121 up vs n     | 0                | 0                         | 0.47969         | 1.47969          | 121 up vs n               | 0               | 0                | 0.47969                   | 1.47969         | 137 down vs n    | 0                         | 0               | 0.47969          | 1.47969                   | 153 down vs n   | 0     | 0    | 0.47969   | 1.47969  | 157 down vs n | 0     | 0    |
| 15422   | 1.90E-40         | 0.02917                   | -1.07623        | 106 down vs n    | 0.72992                   | 7.2992          | 111 up vs n      | 0                         | 0               | 0.4656           | 4.656                     | 121 down vs n   | 0                | 0                         | 0.250514        | -3.98544         | 121 down vs n             | 0               | 0                | 0.250514                  | -3.98544        | 137 down vs n    | 0                         | 0               | 0.250514         | -3.98544                  | 153 down vs n   | 0     | 0    | 0.250514  | -3.98544 | 157 down vs n | 0     | 0    |
| 15423   | 0                | 0.417358                  | -2.95957        | 106 down vs n    | 0.202379                  | 2.02379         | 111 up vs n      | 0                         | 0               | 1.06799          | 1.06799                   | 121 up vs n     | 0                | 0                         | 0.160803        | -6.2188          | 121 down vs n             | 0               | 0                | 0.160803                  | -6.2188         | 137 down vs n    | 0                         | 0               | 0.160803         | -6.2188                   | 153 down vs n   | 0     | 0    | 0.160803  | -6.2188  | 157 down vs n | 0     | 0    |
| 15424   | 0                | 0.0587444                 | -17.0229        | 106 down vs n    | 0.0626344                 | -1.09315        | 111 down vs n    | 0                         | 0               | 0.0626344        | -15.9579                  | 121 down vs n   | 0                | 0                         | 0.741787        | -1.3481          | 121 down vs n             | 0               | 0                | 0.741787                  | -1.3481         | 137 down vs n    | 0                         | 0               | 0.741787         | -1.3481                   | 153 down vs n   | 0     | 0    | 0.741787  | -1.3481  | 157 down vs n | 0     | 0    |
| 15425   | 0                | 0.588818                  | -2.71283        | 106 down vs n    | 0.20104                   | 2.0104          | 111 up vs n      | 0                         | 0               | 0.68126          | 1.68126                   | 121 up vs n     | 0                | 0                         | 0.267111        | -1.74376         | 121 down vs n             | 0               | 0                | 0.267111                  | -1.74376        | 137 down vs n    | 0                         | 0               | 0.267111         | -1.74376                  | 153 down vs n   | 0     | 0    | 0.267111  | -1.74376 | 157 down vs n | 0     | 0    |
| 15426   | 0                | 0.135089                  | -5.15586        | 106 down vs n    | 0.546073                  | 5.46073         | 111 up vs n      | 0                         | 0               | 0.569944         | -1.74563                  | 121 down vs n   | 0                | 0                         | 0.120521        | -7.9038          | 121 down vs n             | 0               | 0                | 0.120521                  | -7.9038         | 137 down vs n    | 0                         | 0               | 0.120521         | -7.9038                   | 153 down vs n   | 0     | 0    | 0.120521  | -7.9038  | 157 down vs n | 0     | 0    |
| 15427   | 0                | 0.128157                  | -7.8029         | 106 down vs n    | 0.136212                  | 1.36212         | 111 up vs n      | 0                         | 0               | 0.424269         | -2.36704                  | 121 down vs n   | 0                | 0                         | 0.515912        | -1.93831         | 121 down vs n             | 0               | 0                | 0.515912                  | -1.93831        | 137 down vs n    | 0                         | 0               | 0.515912         | -1.93831                  | 153 down vs n   | 0     | 0    | 0.515912  | -1.93831 | 157 down vs n | 0     | 0    |
| 15428   | 7.01E-45         | 0.130429                  | -7.80292        | 106 down vs n    | 0.364683                  | 3.64683         | 111 up vs n      | 0                         | 0               | 0.494086         | -0.2218                   | 121 down vs n   | 0                | 0                         | 0.494086        | -0.2218          | 121 down vs n             | 0               | 0                | 0.494086                  | -0.2218         | 137 down vs n    | 0                         | 0               | 0.494086         | -0.2218                   | 153 down vs n   | 0     | 0    | 0.494086  | -0.2218  | 157 down vs n | 0     | 0    |
| 15429   | 0                | 0.106454                  | -7.90919        | 106 down vs n    | 0.147212                  | 1.47212         | 111 up vs n      | 0                         | 0               | 0.758327         | -1.11869                  | 121 down vs n   | 0                | 0                         | 0.412093        | -2.42664         | 121 down vs n             | 0               | 0                | 0.412093                  | -2.42664        | 137 down vs n    | 0                         | 0               | 0.412093         | -2.42664                  | 153 down vs n   | 0     | 0    | 0.412093  | -2.42664 | 157 down vs n | 0     | 0    |
| 15430   | 3.19E-43         | 0.0016785                 | -595.756        | 106 down vs n    | 0.17841                   | 1.7841          | 111 up vs n      | 0                         | 0               | -0.78917         | 3.78917                   | 121 up vs n     | 0                | 0                         | 1.23444         | 1.23444          | 121 up vs n               | 0               | 0                | 1.23444                   | 1.23444         | 137 down vs n    | 0                         | 0               | 1.23444          | 1.23444                   | 153 down vs n   | 0     | 0    | 1.23444   | 1.23444  | 157 down vs n | 0     | 0    |
| 15431   | 0                | 0.210352                  | -4.75191        | 106 down vs n    | 0.442563                  | 4.42563         | 111 up vs n      | 0                         | 0               | 0.0379662        | -26.3254                  | 121 down vs n   | 0                | 0                         | 0.261427        | -1.82515         | 121 down vs n             | 0               | 0                | 0.261427                  | -1.82515        | 137 down vs n    | 0                         | 0               | 0.261427         | -1.82515                  | 153 down vs n   | 0     | 0    | 0.261427  | -1.82515 | 157 down vs n | 0     | 0    |
| 15432   | 0                | 0.128157                  | -7.8029         | 106 down vs n    | 0.136212                  | 1.36212         | 111 up vs n      | 0                         | 0               | 0.424269         | -2.36704                  | 121 down vs n   | 0                | 0                         | 0.515912        | -1.93831         | 121 down vs n             | 0               | 0                | 0.515912                  | -1.93831        | 137 down vs n    | 0                         | 0               | 0.515912         | -1.93831                  | 153 down vs n   | 0     | 0    | 0.515912  | -1.93831 | 157 down vs n | 0     | 0    |
| 15433   | 0                | 0.274468                  | -3.64343        | 106 down vs n    | 0.158537                  | 1.58537         | 111 up vs n      | 0                         | 0               | 0.966414         | -0.04375                  | 121 down vs n   | 0                | 0                         | 0.166819        | 1.66819          | 121 down vs n             | 0               | 0                | 0.166819                  | 1.66819         | 137 down vs n    | 0                         | 0               | 0.166819         | 1.66819                   | 153 down vs n   | 0     | 0    | 0.166819  | 1.66819  | 157 down vs n | 0     | 0    |
| 15434   | 0                | 0.774599                  | -7.10436        | 106 down vs n    | 0.12126                   | 1.2126          | 111 up vs n      | 0                         | 0               | 0.28628          | 2.8628                    | 121 down vs n   | 0                | 0                         | 0.793188        | -2.6582          | 121 down vs n             | 0               | 0                | 0.793188                  | -2.6582         | 137 down vs n    | 0                         | 0               | 0.793188         | -2.6582                   | 153 down vs n   | 0     | 0    | 0.793188  | -2.6582  | 157 down vs n | 0     | 0    |
| 15435   | 0                | 0.143431                  | -6.16554        | 106 down vs n    | 0.12927                   | 1.2927          | 111 up vs n      | 0                         | 0               | 0.52384          | 6.52384                   | 121 down vs n   | 0                | 0                         | 0.444804        | -2.4773          | 121 down vs n             | 0               | 0                | 0.444804                  | -2.4773         | 137 down vs n    | 0                         | 0               | 0.444804         | -2.4773                   | 153 down vs n   | 0     | 0    | 0.444804  | -2.4773  | 157 down vs n | 0     | 0    |
| 15436   | 0                | -0.512071                 | -1.95286        | 106 down vs n    | 0.0653                    | 1.65207         | 111 down vs n    | 0                         | 0               | -0.93023         | -1.07502                  | 121 down vs n   | 0                | 0                         | 0.739659        | -1.35197         | 121 down vs n             | 0               | 0                | 0.739659                  | -1.35197        | 137 down vs n    | 0                         | 0               | 0.739659         | -1.35197                  | 153 down vs n   | 0     | 0    | 0.739659  | -1.35197 | 157 down vs n | 0     | 0    |
| 15437   | 0                | -1.2116                   | -40.8212        | 106 down vs n    | 0.568792                  | -1.75811        | 111 down vs n    | 0                         | 0               | 0.41784          | 1.4784                    | 121 up vs n     | 0                | 0                         | 0.072193        | -11.866          | 121 down vs n             | 0               | 0                | 0.072193                  | -11.866         | 137 down vs n    | 0                         | 0               | 0.072193         | -11.866                   | 153 down vs n   | 0     | 0    | 0.072193  | -11.866  | 157 down vs n | 0     | 0    |
| 15438   | 0                | 0.143431                  | -6.16554        | 106 down vs n    | 0.12927                   | 1.2927          | 111 up vs n      | 0                         | 0               | 0.52384          | 6.52384                   | 121 down vs n   | 0                | 0                         | 0.444804        | -2.4773          | 121 down vs n             | 0               | 0                | 0.444804                  | -2.4773         | 137 down vs n    | 0                         | 0               | 0.444804         | -2.4773                   | 153 down vs n   | 0     | 0    | 0.444804  | -2.4773  | 157 down vs n | 0     | 0    |
| 15439   | 0                | 0.326318                  | -3.06449        | 106 down vs n    | 0.141682                  | 1.41682         | 111 up vs n      | 0                         | 0               | 0.906589         | -1.0425                   | 121 down vs n   | 0                | 0                         | 0.062559        | -4.43191         | 121 down vs n             | 0               | 0                | 0.062559                  | -4.43191        | 137 down vs n    | 0                         | 0               | 0.062559         | -4.43191                  | 153 down vs n   | 0     | 0    | 0.062559  | -4.43191 | 157 down vs n | 0     | 0    |
| 15440   | 0                | 0.0351514                 | -31.7285        | 106 down vs n    | 0.0372969                 | -26.8317        | 111 down vs n    | 0                         | 0               | 0.236371         | 2.36371                   | 121 up vs n     | 0                | 0                         | 0.261761        | -3.82028         | 121 down vs n             | 0               | 0                | 0.261761                  | -3.82028        | 137 down vs n    | 0                         | 0               | 0.261761         | -3.82028                  | 153 down vs n   | 0     | 0    | 0.261761  | -3.82028 | 157 down vs n | 0     | 0    |
| 15441   | 0                | 0.252328                  | -2.71283        | 106 down vs n    | 0.20104                   | 2.0104          | 111 up vs n      | 0                         | 0               | 0.68126          | 1.68126                   | 121 up vs n     | 0                | 0                         | 0.267111        | -1.74376         | 121 down vs n             | 0               | 0                | 0.267111                  | -1.74376        | 137 down vs n    | 0                         | 0               | 0.267111         | -1.74376                  | 153 down vs n   | 0     | 0    | 0.267111  | -1.74376 | 157 down vs n | 0     | 0    |
| 15442   | 0                | 0.207041                  | -4.82995        | 106 down vs n    | 0.232973                  | 2.32973         | 111 up vs n      | 0                         | 0               | 0.106156         | 1.06156                   | 121 up vs n     | 0                | 0                         | 0.32909         | -0.03868         | 121 down vs n             | 0               | 0                | 0.32909                   | -0.03868        | 137 down vs n    | 0                         | 0               | 0.32909          | -0.03868                  | 153 down vs n   | 0     | 0    | 0.32909   | -0.03868 | 157 down vs n | 0     | 0    |
| 15443   | 0                | 0.562279                  | -1.7998         | 106 down vs n    | 0.0604178                 | -1.65514        | 111 down vs n    | 0                         | 0               | 0.50208          | -1.9912                   | 121 down vs n   | 0                | 0                         | 0.22229         | -4.8962          | 121 down vs n             | 0               | 0                | 0.22229                   | -4.8962         | 137 down vs n    | 0                         | 0               | 0.22229          | -4.8962                   | 153 down vs n   | 0     | 0    | 0.22229   | -4.8962  | 157 down vs n | 0     | 0    |
| 15444   | 0                | 0.143431                  | -6.16554        | 106 down vs n    | 0.12927                   | 1.2927          | 111 up vs n      | 0                         | 0               | 0.52384          | 6.52384                   | 121 down vs n   | 0                | 0                         | 0.444804        | -2.4773          | 121 down vs n             | 0               | 0                | 0.444804                  | -2.4773         | 137 down vs n    | 0                         | 0               | 0.444804         | -2.4773                   | 153 down vs n   | 0     | 0    | 0.444804  | -2.4773  | 157 down vs n | 0     | 0    |
| 15445   | 0                | 0.162576                  | -4.95098        | 106 down vs n    | 0.12889                   | -7.75854        | 111 down vs n    | 0                         | 0               | 0.38526          | 3.8526                    | 121 up vs n     | 0                | 0                         | 0.285324        | -1.8115          | 121 down vs n             | 0               | 0                | 0.285324                  | -1.8115         | 137 down vs n    | 0                         | 0               | 0.285324         | -1.8115                   | 153 down vs n   | 0     | 0    | 0.285324  | -1.8115  | 157 down vs n | 0     | 0    |
| 15446   | 0                | 0.050528                  | -1.57989        | 106 down vs n    | 0.13841                   | 1.3841          | 111 up vs n      | 0                         | 0               | 0.73048          | -1.4075                   | 121 down vs n   | 0                | 0                         | 0.557894        | -1.79245         | 121 down vs n             | 0               | 0                | 0.557894                  | -1.79245        | 137 down vs n    |                           |                 |                  |                           |                 |       |      |           |          |               |       |      |
