# Supplementary material
Source: PubMed Central journal article supplement (PMC4028366)
Supplement: NIHMS545812-supplement-401_2013_1218_MOESM11_ESM.pdf [file NIHMS545812-supplement-401_2013_1218_MOESM11_ESM.pdf]

File: ESM\_10 (Online Resource 10)

Title: Comparative Multidimensional Molecular Analyses of Pediatric Diffuse Intrinsic Gliomas Reveals Distinct Molecular Subtypes  
Journal: Acta Neurochirurgica

Authors: Amanda M. Stransik, Madhuri Kumbhakar, Kendall Syffert, Sidique Yasin, Joe Devenney, Brennan Harmon, Jordan Hall, Eric H. Rubie, Ping An, Melanie Weingart, Brian Reid, Sarah Magee, Roger J. Packer, Javad Nazarian

Corresponding Author:

Javad Nazarian, Children's National Medical Center, Center for Genetic Medicine  
111 Michigan Ave., NW, Washington, DC, 20010  
Tel: 202-476-6022; Fax: 202-476-6014  
Email: J.Nazarian@CNMC.org

| Gene ID |  | p-value |  | FolChang106 |  | FolChang107 |  | FolChang108 |  | FolChang109 |  | FolChang110 |  | FolChang111 |  | FolChang112 |  | FolChang113 |  | FolChang114 |  | FolChang115 |  | FolChang116 |  | FolChang117 |  | FolChang118 |  | FolChang119 |  | FolChang120 |  | FolChang121 |  | FolChang122 |  | FolChang123 |  | FolChang124 |  | FolChang125 |  | FolChang126 |  | FolChang127 |  | FolChang128 |  | FolChang129 |  | FolChang130 |  | FolChang131 |  | FolChang132 |  | FolChang133 |  | FolChang134 |  | FolChang135 |  | FolChang136 |  | FolChang137 |  | FolChang138 |  | FolChang139 |  | FolChang140 |  | FolChang141 |  | FolChang142 |  | FolChang143 |  | FolChang144 |  | FolChang145 |  | FolChang146 |  | FolChang147 |  | FolChang148 |  | FolChang149 |  | FolChang150 |  | FolChang151 |  | FolChang152 |  | FolChang153 |  | FolChang154 |  | FolChang155 |  | FolChang156 |  | FolChang157 |  | FolChang158 |  | FolChang159 |  | FolChang160 |  | FolChang161 |  | FolChang162 |  | FolChang163 |  | FolChang164 |  | FolChang165 |  | FolChang166 |  | FolChang167 |  | FolChang168 |  | FolChang169 |  | FolChang170 |  | FolChang171 |  | FolChang172 |  | FolChang173 |  | FolChang174 |  | FolChang175 |  | FolChang176 |  | FolChang177 |  | FolChang178 |  | FolChang179 |  | FolChang180 |  | FolChang181 |  | FolChang182 |  | FolChang183 |  | FolChang184 |  | FolChang185 |  | FolChang186 |  | FolChang187 |  | FolChang188 |  | FolChang189 |  | FolChang190 |  | FolChang191 |  | FolChang192 |  | FolChang193 |  | FolChang194 |  | FolChang195 |  | FolChang196 |  | FolChang197 |  | FolChang198 |  | FolChang199 |  | FolChang200 |  | FolChang201 |  | FolChang202 |  | FolChang203 |  | FolChang204 |  | FolChang205 |  | FolChang206 |  | FolChang207 |  | FolChang208 |  | FolChang209 |  | FolChang210 |  | FolChang211 |  | FolChang212 |  | FolChang213 |  | FolChang214 |  | FolChang215 |  | FolChang216 |  | FolChang217 |  | FolChang218 |  | FolChang219 |  | FolChang220 |  | FolChang221 |  | FolChang222 |  | FolChang223 |  | FolChang224 |  | FolChang225 |  | FolChang226 |  | FolChang227 |  | FolChang228 |  | FolChang229 |  | FolChang230 |  | FolChang231 |  | FolChang232 |  | FolChang233 |  | FolChang234 |  | FolChang235 |  | FolChang236 |  | FolChang237 |  | FolChang238 |  | FolChang239 |  | FolChang240 |  | FolChang241 |  | FolChang242 |  | FolChang243 |  | FolChang244 |  | FolChang245 |  | FolChang246 |  | FolChang247 |  | FolChang248 |  | FolChang249 |  | FolChang250 |  | FolChang251 |  | FolChang252 |  | FolChang253 |  | FolChang254 |  | FolChang255 |  | FolChang256 |  | FolChang257 |  | FolChang258 |  | FolChang259 |  | FolChang260 |  | FolChang261 |  | FolChang262 |  | FolChang263 |  | FolChang264 |  | FolChang265 |  | FolChang266 |  | FolChang267 |  | FolChang268 |  | FolChang269 |  | FolChang270 |  | FolChang271 |  | FolChang272 |  | FolChang273 |  | FolChang274 |  | FolChang275 |  | FolChang276 |  | FolChang277 |  | FolChang278 |  | FolChang279 |  | FolChang280 |  | FolChang281 |  | FolChang282 |  | FolChang283 |  | FolChang284 |  | FolChang285 |  | FolChang286 |  | FolChang287 |  | FolChang288 |  | FolChang289 |  | FolChang290 |  | FolChang291 |  | FolChang292 |  | FolChang293 |  | FolChang294 |  | FolChang295 |  | FolChang296 |  | FolChang297 |  | FolChang298 |  | FolChang299 |  | FolChang300 |  | FolChang301 |  | FolChang302 |  | FolChang303 |  | FolChang304 |  | FolChang305 |  | FolChang306 |  | FolChang307 |  | FolChang308 |  | FolChang309 |  | FolChang310 |  | FolChang311 |  | FolChang312 |  | FolChang313 |  | FolChang314 |  | FolChang315 |  | FolChang316 |  | FolChang317 |  | FolChang318 |  | FolChang319 |  | FolChang320 |  | FolChang321 |  | FolChang322 |  | FolChang323 |  | FolChang324 |  | FolChang325 |  | FolChang326 |  | FolChang327 |  | FolChang328 |  | FolChang329 |  | FolChang330 |  | FolChang331 |  | FolChang332 |  | FolChang333 |  | FolChang334 |  | FolChang335 |  | FolChang336 |  | FolChang337 |  | FolChang338 |  | FolChang339 |  | FolChang340 |  | FolChang341 |  | FolChang342 |  | FolChang343 |  | FolChang344 |  | FolChang345 |  | FolChang346 |  | FolChang347 |  | FolChang348 |  | FolChang349 |  | FolChang350 |  | FolChang351 |  | FolChang352 |  | FolChang353 |  | FolChang354 |  | FolChang355 |  | FolChang356 |  | FolChang357 |  | FolChang358 |  | FolChang359 |  | FolChang360 |  | FolChang361 |  | FolChang362 |  | FolChang363 |  | FolChang364 |  | FolChang365 |  | FolChang366 |  | FolChang367 |  | FolChang368 |  | FolChang369 |  | FolChang370 |  | FolChang371 |  | FolChang372 |  | FolChang373 |  | FolChang374 |  | FolChang375 |  | FolChang376 |  | FolChang377 |  | FolChang378 |  | FolChang379 |  | FolChang380 |  | FolChang381 |  | FolChang382 |  | FolChang383 |  | FolChang384 |  | FolChang385 |  | FolChang386 |  | FolChang387 |  | FolChang388 |  | FolChang389 |  | FolChang390 |  | FolChang391 |  | FolChang392 |  | FolChang393 |  | FolChang394 |  | FolChang395 |  | FolChang396 |  | FolChang397 |  | FolChang398 |  | FolChang399 |  | FolChang400 |  | FolChang401 |  | FolChang402 |  | FolChang403 |  | FolChang404 |  | FolChang405 |  | FolChang406 |  | FolChang407 |  | FolChang408 |  | FolChang409 |  | FolChang410 |  | FolChang411 |  | FolChang412 |  | FolChang413 |  | FolChang414 |  | FolChang415 |  | FolChang416 |  | FolChang417 |  | FolChang418 |  | FolChang419 |  | FolChang420 |  | FolChang421 |  | FolChang422 |  | FolChang423 |  | FolChang424 |  | FolChang425 |  | FolChang426 |  | FolChang427 |  | FolChang428 |  | FolChang429 |  | FolChang430 |  | FolChang431 |  | FolChang432 |  | FolChang433 |  | FolChang434 |  | FolChang435 |  | FolChang436 |  | FolChang437 |  | FolChang438 |  | FolChang439 |  | FolChang440 |  | FolChang441 |  | FolChang442 |  | FolChang443 |  | FolChang444 |  | FolChang445 |  | FolChang446 |  | FolChang447 |  | FolChang448 |  | FolChang449 |  | FolChang450 |  | FolChang451 |  | FolChang452 |  | FolChang453 |  | FolChang454 |  | FolChang455 |  | FolChang456 |  | FolChang457 |  | FolChang458 |  | FolChang459 |  | FolChang460 |  | FolChang461 |  | FolChang462 |  | FolChang463 |  | FolChang464 |  | FolChang465 |  | FolChang466 |  | FolChang467 |  | FolChang468 |  | FolChang469 |  | FolChang470 |  | FolChang471 |  | FolChang472 |  | FolChang473 |  | FolChang474 |  | FolChang475 |  | FolChang476 |  | FolChang477 |  | FolChang478 |  | FolChang479 |  | FolChang480 |  | FolChang481 |  | FolChang482 |  | FolChang483 |  | FolChang484 |  | FolChang485 |  | FolChang486 |  | FolChang487 |  | FolChang488 |  | FolChang489 |  | FolChang490 |  | FolChang491 |  | FolChang492 |  | FolChang493 |  | FolChang494 |  | FolChang495 |  | FolChang496 |  | FolChang497 |  | FolChang498 |  | FolChang499 |  | FolChang500 |  | FolChang501 |  | FolChang502 |  | FolChang503 |  | FolChang504 |  |
|---------|--|---------|--|-------------|--|-------------|--|-------------|--|-------------|--|-------------|--|-------------|--|-------------|--|-------------|--|-------------|--|-------------|--|-------------|--|-------------|--|-------------|--|-------------|--|-------------|--|-------------|--|-------------|--|-------------|--|-------------|--|-------------|--|-------------|--|-------------|--|-------------|--|-------------|--|-------------|--|-------------|--|-------------|--|-------------|--|-------------|--|-------------|--|-------------|--|-------------|--|-------------|--|-------------|--|-------------|--|-------------|--|-------------|--|-------------|--|-------------|--|-------------|--|-------------|--|-------------|--|-------------|--|-------------|--|-------------|--|-------------|--|-------------|--|-------------|--|-------------|--|-------------|--|-------------|--|-------------|--|-------------|--|-------------|--|-------------|--|-------------|--|-------------|--|-------------|--|-------------|--|-------------|--|-------------|--|-------------|--|-------------|--|-------------|--|-------------|--|-------------|--|-------------|--|-------------|--|-------------|--|-------------|--|-------------|--|-------------|--|-------------|--|-------------|--|-------------|--|-------------|--|-------------|--|-------------|--|-------------|--|-------------|--|-------------|--|-------------|--|-------------|--|-------------|--|-------------|--|-------------|--|-------------|--|-------------|--|-------------|--|-------------|--|-------------|--|-------------|--|-------------|--|-------------|--|-------------|--|-------------|--|-------------|--|-------------|--|-------------|--|-------------|--|-------------|--|-------------|--|-------------|--|-------------|--|-------------|--|-------------|--|-------------|--|-------------|--|-------------|--|-------------|--|-------------|--|-------------|--|-------------|--|-------------|--|-------------|--|-------------|--|-------------|--|-------------|--|-------------|--|-------------|--|-------------|--|-------------|--|-------------|--|-------------|--|-------------|--|-------------|--|-------------|--|-------------|--|-------------|--|-------------|--|-------------|--|-------------|--|-------------|--|-------------|--|-------------|--|-------------|--|-------------|--|-------------|--|-------------|--|-------------|--|-------------|--|-------------|--|-------------|--|-------------|--|-------------|--|-------------|--|-------------|--|-------------|--|-------------|--|-------------|--|-------------|--|-------------|--|-------------|--|-------------|--|-------------|--|-------------|--|-------------|--|-------------|--|-------------|--|-------------|--|-------------|--|-------------|--|-------------|--|-------------|--|-------------|--|-------------|--|-------------|--|-------------|--|-------------|--|-------------|--|-------------|--|-------------|--|-------------|--|-------------|--|-------------|--|-------------|--|-------------|--|-------------|--|-------------|--|-------------|--|-------------|--|-------------|--|-------------|--|-------------|--|-------------|--|-------------|--|-------------|--|-------------|--|-------------|--|-------------|--|-------------|--|-------------|--|-------------|--|-------------|--|-------------|--|-------------|--|-------------|--|-------------|--|-------------|--|-------------|--|-------------|--|-------------|--|-------------|--|-------------|--|-------------|--|-------------|--|-------------|--|-------------|--|-------------|--|-------------|--|-------------|--|-------------|--|-------------|--|-------------|--|-------------|--|-------------|--|-------------|--|-------------|--|-------------|--|-------------|--|-------------|--|-------------|--|-------------|--|-------------|--|-------------|--|-------------|--|-------------|--|-------------|--|-------------|--|-------------|--|-------------|--|-------------|--|-------------|--|-------------|--|-------------|--|-------------|--|-------------|--|-------------|--|-------------|--|-------------|--|-------------|--|-------------|--|-------------|--|-------------|--|-------------|--|-------------|--|-------------|--|-------------|--|-------------|--|-------------|--|-------------|--|-------------|--|-------------|--|-------------|--|-------------|--|-------------|--|-------------|--|-------------|--|-------------|--|-------------|--|-------------|--|-------------|--|-------------|--|-------------|--|-------------|--|-------------|--|-------------|--|-------------|--|-------------|--|-------------|--|-------------|--|-------------|--|-------------|--|-------------|--|-------------|--|-------------|--|-------------|--|-------------|--|-------------|--|-------------|--|-------------|--|-------------|--|-------------|--|-------------|--|-------------|--|-------------|--|-------------|--|-------------|--|-------------|--|-------------|--|-------------|--|-------------|--|-------------|--|-------------|--|-------------|--|-------------|--|-------------|--|-------------|--|-------------|--|-------------|--|-------------|--|-------------|--|-------------|--|-------------|--|-------------|--|-------------|--|-------------|--|-------------|--|-------------|--|-------------|--|-------------|--|-------------|--|-------------|--|-------------|--|-------------|--|-------------|--|-------------|--|-------------|--|-------------|--|-------------|--|-------------|--|-------------|--|-------------|--|-------------|--|-------------|--|-------------|--|-------------|--|-------------|--|-------------|--|-------------|--|-------------|--|-------------|--|-------------|--|-------------|--|-------------|--|-------------|--|-------------|--|-------------|--|-------------|--|-------------|--|-------------|--|-------------|--|-------------|--|-------------|--|-------------|--|-------------|--|-------------|--|-------------|--|-------------|--|-------------|--|-------------|--|-------------|--|-------------|--|-------------|--|-------------|--|-------------|--|-------------|--|-------------|--|-------------|--|-------------|--|-------------|--|-------------|--|-------------|--|-------------|--|-------------|--|-------------|--|-------------|--|-------------|--|-------------|--|-------------|--|-------------|--|-------------|--|-------------|--|-------------|--|-------------|--|-------------|--|-------------|--|-------------|--|-------------|--|-------------|--|-------------|--|-------------|--|-------------|--|-------------|--|-------------|--|-------------|--|-------------|--|-------------|--|-------------|--|-------------|--|-------------|--|-------------|--|-------------|--|-------------|--|-------------|--|-------------|--|-------------|--|-------------|--|-------------|--|
|---------|--|---------|--|-------------|--|-------------|--|-------------|--|-------------|--|-------------|--|-------------|--|-------------|--|-------------|--|-------------|--|-------------|--|-------------|--|-------------|--|-------------|--|-------------|--|-------------|--|-------------|--|-------------|--|-------------|--|-------------|--|-------------|--|-------------|--|-------------|--|-------------|--|-------------|--|-------------|--|-------------|--|-------------|--|-------------|--|-------------|--|-------------|--|-------------|--|-------------|--|-------------|--|-------------|--|-------------|--|-------------|--|-------------|--|-------------|--|-------------|--|-------------|--|-------------|--|-------------|--|-------------|--|-------------|--|-------------|--|-------------|--|-------------|--|-------------|--|-------------|--|-------------|--|-------------|--|-------------|--|-------------|--|-------------|--|-------------|--|-------------|--|-------------|--|-------------|--|-------------|--|-------------|--|-------------|--|-------------|--|-------------|--|-------------|--|-------------|--|-------------|--|-------------|--|-------------|--|-------------|--|-------------|--|-------------|--|-------------|--|-------------|--|-------------|--|-------------|--|-------------|--|-------------|--|-------------|--|-------------|--|-------------|--|-------------|--|-------------|--|-------------|--|-------------|--|-------------|--|-------------|--|-------------|--|-------------|--|-------------|--|-------------|--|-------------|--|-------------|--|-------------|--|-------------|--|-------------|--|-------------|--|-------------|--|-------------|--|-------------|--|-------------|--|-------------|--|-------------|--|-------------|--|-------------|--|-------------|--|-------------|--|-------------|--|-------------|--|-------------|--|-------------|--|-------------|--|-------------|--|-------------|--|-------------|--|-------------|--|-------------|--|-------------|--|-------------|--|-------------|--|-------------|--|-------------|--|-------------|--|-------------|--|-------------|--|-------------|--|-------------|--|-------------|--|-------------|--|-------------|--|-------------|--|-------------|--|-------------|--|-------------|--|-------------|--|-------------|--|-------------|--|-------------|--|-------------|--|-------------|--|-------------|--|-------------|--|-------------|--|-------------|--|-------------|--|-------------|--|-------------|--|-------------|--|-------------|--|-------------|--|-------------|--|-------------|--|-------------|--|-------------|--|-------------|--|-------------|--|-------------|--|-------------|--|-------------|--|-------------|--|-------------|--|-------------|--|-------------|--|-------------|--|-------------|--|-------------|--|-------------|--|-------------|--|-------------|--|-------------|--|-------------|--|-------------|--|-------------|--|-------------|--|-------------|--|-------------|--|-------------|--|-------------|--|-------------|--|-------------|--|-------------|--|-------------|--|-------------|--|-------------|--|-------------|--|-------------|--|-------------|--|-------------|--|-------------|--|-------------|--|-------------|--|-------------|--|-------------|--|-------------|--|-------------|--|-------------|--|-------------|--|-------------|--|-------------|--|-------------|--|-------------|--|-------------|--|-------------|--|-------------|--|-------------|--|-------------|--|-------------|--|-------------|--|-------------|--|-------------|--|-------------|--|-------------|--|-------------|--|-------------|--|-------------|--|-------------|--|-------------|--|-------------|--|-------------|--|-------------|--|-------------|--|-------------|--|-------------|--|-------------|--|-------------|--|-------------|--|-------------|--|-------------|--|-------------|--|-------------|--|-------------|--|-------------|--|-------------|--|-------------|--|-------------|--|-------------|--|-------------|--|-------------|--|-------------|--|-------------|--|-------------|--|-------------|--|-------------|--|-------------|--|-------------|--|-------------|--|-------------|--|-------------|--|-------------|--|-------------|--|-------------|--|-------------|--|-------------|--|-------------|--|-------------|--|-------------|--|-------------|--|-------------|--|-------------|--|-------------|--|-------------|--|-------------|--|-------------|--|-------------|--|-------------|--|-------------|--|-------------|--|-------------|--|-------------|--|-------------|--|-------------|--|-------------|--|-------------|--|-------------|--|-------------|--|-------------|--|-------------|--|-------------|--|-------------|--|-------------|--|-------------|--|-------------|--|-------------|--|-------------|--|-------------|--|-------------|--|-------------|--|-------------|--|-------------|--|-------------|--|-------------|--|-------------|--|-------------|--|-------------|--|-------------|--|-------------|--|-------------|--|-------------|--|-------------|--|-------------|--|-------------|--|-------------|--|-------------|--|-------------|--|-------------|--|-------------|--|-------------|--|-------------|--|-------------|--|-------------|--|-------------|--|-------------|--|-------------|--|-------------|--|-------------|--|-------------|--|-------------|--|-------------|--|-------------|--|-------------|--|-------------|--|-------------|--|-------------|--|-------------|--|-------------|--|-------------|--|-------------|--|-------------|--|-------------|--|-------------|--|-------------|--|-------------|--|-------------|--|-------------|--|-------------|--|-------------|--|-------------|--|-------------|--|-------------|--|-------------|--|-------------|--|-------------|--|-------------|--|-------------|--|-------------|--|-------------|--|-------------|--|-------------|--|-------------|--|-------------|--|-------------|--|-------------|--|-------------|--|-------------|--|-------------|--|-------------|--|-------------|--|-------------|--|-------------|--|-------------|--|-------------|--|-------------|--|-------------|--|-------------|--|-------------|--|-------------|--|-------------|--|-------------|--|-------------|--|-------------|--|-------------|--|-------------|--|-------------|--|-------------|--|-------------|--|-------------|--|-------------|--|-------------|--|-------------|--|-------------|--|-------------|--|-------------|--|-------------|--|-------------|--|-------------|--|-------------|--|-------------|--|-------------|--|-------------|--|-------------|--|-------------|--|-------------|--|-------------|--|-------------|--|-------------|--|-------------|--|-------------|--|-------------|--|-------------|--|-------------|--|

File: ESM\_10 (Online Resource 10)

Figure: Comparative Multidimensional Molecular Analyses of Pediatric Diffuse Intrinsic Piloile Gloma Reveals Distinct Molecular Subtypes  
Journal: Acta Neuropathologica

Authors: Amanda M. Senn, Madhuri Kumbhakar, Kendall Snyder, Sidick Yavuz, Joe Deveney,  
Brennan Harmon, Jordan Hall, Eric H. Raabe, Ping An, Melanie Weingart, Brian Ross, Sarah Mudge, Roger J. Packer, Javad Nazarian

Corresponding Author:

Javad Nazarian, Children's National Medical Center, Center for Genetic Medicine  
111 Michigan Ave., NW, Washington DC, 20010  
Phone: 202-476-6022 Fax: 202-476-6014  
Email: J.Nazarian@CNMC.org

| Gene ID | p-<br>value[106] | MeanRatio<br>(106 vs. n) | FoldChange[106] | p-<br>value[107] | MeanRatio<br>(107 vs. n) | FoldChange[107] | p-<br>value[108] | MeanRatio<br>(108 vs. n) | FoldChange[108] | p-<br>value[109] | MeanRatio<br>(109 vs. n) | FoldChange[109] | p-<br>value[110] | MeanRatio<br>(110 vs. n) | FoldChange[110] | p-<br>value[111] | MeanRatio<br>(111 vs. n) | FoldChange[111] | p-<br>value[112] | MeanRatio<br>(112 vs. n) | FoldChange[112] | p-<br>value[113] | MeanRatio<br>(113 vs. n) | FoldChange[113] | p-<br>value[114] | MeanRatio<br>(114 vs. n) | FoldChange[114] | p-<br>value[115] | MeanRatio<br>(115 vs. n) | FoldChange[115] | p-<br>value[116] | MeanRatio<br>(116 vs. n) | FoldChange[116] | p-<br>value[117] | MeanRatio<br>(117 vs. n) | FoldChange[117] | p-<br>value[118] | MeanRatio<br>(118 vs. n) | FoldChange[118] | p-<br>value[119] | MeanRatio<br>(119 vs. n) | FoldChange[119] | p-<br>value[120] | MeanRatio<br>(120 vs. n) | FoldChange[120] | p-<br>value[121] | MeanRatio<br>(121 vs. n) | FoldChange[121] | p-<br>value[122] | MeanRatio<br>(122 vs. n) | FoldChange[122] | p-<br>value[123] | MeanRatio<br>(123 vs. n) | FoldChange[123] | p-<br>value[124] | MeanRatio<br>(124 vs. n) | FoldChange[124] | p-<br>value[125] | MeanRatio<br>(125 vs. n) | FoldChange[125] | p-<br>value[126] | MeanRatio<br>(126 vs. n) | FoldChange[126] | p-<br>value[127] | MeanRatio<br>(127 vs. n) | FoldChange[127] | p-<br>value[128] | MeanRatio<br>(128 vs. n) | FoldChange[128] | p-<br>value[129] | MeanRatio<br>(129 vs. n) | FoldChange[129] | p-<br>value[130] | MeanRatio<br>(130 vs. n) | FoldChange[130] | p-<br>value[131] | MeanRatio<br>(131 vs. n) | FoldChange[131] | p-<br>value[132] | MeanRatio<br>(132 vs. n) | FoldChange[132] | p-<br>value[133] | MeanRatio<br>(133 vs. n) | FoldChange[133] | p-<br>value[134] | MeanRatio<br>(134 vs. n) | FoldChange[134] | p-<br>value[135] | MeanRatio<br>(135 vs. n) | FoldChange[135] | p-<br>value[136] | MeanRatio<br>(136 vs. n) | FoldChange[136] | p-<br>value[137] | MeanRatio<br>(137 vs. n) | FoldChange[137] | p-<br>value[138] | MeanRatio<br>(138 vs. n) | FoldChange[138] | p-<br>value[139] | MeanRatio<br>(139 vs. n) | FoldChange[139] | p-<br>value[140] | MeanRatio<br>(140 vs. n) | FoldChange[140] | p-<br>value[141] | MeanRatio<br>(141 vs. n) | FoldChange[141] | p-<br>value[142] | MeanRatio<br>(142 vs. n) | FoldChange[142] | p-<br>value[143] | MeanRatio<br>(143 vs. n) | FoldChange[143] | p-<br>value[144] | MeanRatio<br>(144 vs. n) | FoldChange[144] | p-<br>value[145] | MeanRatio<br>(145 vs. n) | FoldChange[145] | p-<br>value[146] | MeanRatio<br>(146 vs. n) | FoldChange[146] | p-<br>value[147] | MeanRatio<br>(147 vs. n) | FoldChange[147] | p-<br>value[148] | MeanRatio<br>(148 vs. n) | FoldChange[148] | p-<br>value[149] | MeanRatio<br>(149 vs. n) | FoldChange[149] | p-<br>value[150] | MeanRatio<br>(150 vs. n) | FoldChange[150] | p-<br>value[151] | MeanRatio<br>(151 vs. n) | FoldChange[151] | p-<br>value[152] | MeanRatio<br>(152 vs. n) | FoldChange[152] | p-<br>value[153] | MeanRatio<br>(153 vs. n) | FoldChange[153] | p-<br>value[154] | MeanRatio<br>(154 vs. n) | FoldChange[154] | p-<br>value[155] | MeanRatio<br>(155 vs. n) | FoldChange[155] | p-<br>value[156] | MeanRatio<br>(156 vs. n) | FoldChange[156] | p-<br>value[157] | MeanRatio<br>(157 vs. n) | FoldChange[157] | p-<br>value[158] | MeanRatio<br>(158 vs. n) | FoldChange[158] | p-<br>value[159] | MeanRatio<br>(159 vs. n) | FoldChange[159] | p-<br>value[160] | MeanRatio<br>(160 vs. n) | FoldChange[160] | p-<br>value[161] | MeanRatio<br>(161 vs. n) | FoldChange[161] | p-<br>value[162] | MeanRatio<br>(162 vs. n) | FoldChange[162] | p-<br>value[163] | MeanRatio<br>(163 vs. n) | FoldChange[163] | p-<br>value[164] | MeanRatio<br>(164 vs. n) | FoldChange[164] | p-<br>value[165] | MeanRatio<br>(165 vs. n) | FoldChange[165] | p-<br>value[166] | MeanRatio<br>(166 vs. n) | FoldChange[166] | p-<br>value[167] | MeanRatio<br>(167 vs. n) | FoldChange[167] | p-<br>value[168] | MeanRatio<br>(168 vs. n) | FoldChange[168] | p-<br>value[169] | MeanRatio<br>(169 vs. n) | FoldChange[169] | p-<br>value[170] | MeanRatio<br>(170 vs. n) | FoldChange[170] | p-<br>value[171] | MeanRatio<br>(171 vs. n) | FoldChange[171] | p-<br>value[172] | MeanRatio<br>(172 vs. n) | FoldChange[172] | p-<br>value[173] | MeanRatio<br>(173 vs. n) | FoldChange[173] | p-<br>value[174] | MeanRatio<br>(174 vs. n) | FoldChange[174] | p-<br>value[175] | MeanRatio<br>(175 vs. n) | FoldChange[175] | p-<br>value[176] | MeanRatio<br>(176 vs. n) | FoldChange[176] | p-<br>value[177] | MeanRatio<br>(177 vs. n) | FoldChange[177] | p-<br>value[178] | MeanRatio<br>(178 vs. n) | FoldChange[178] | p-<br>value[179] | MeanRatio<br>(179 vs. n) | FoldChange[179] | p-<br>value[180] | MeanRatio<br>(180 vs. n) | FoldChange[180] | p-<br>value[181] | MeanRatio<br>(181 vs. n) | FoldChange[181] | p-<br>value[182] | MeanRatio<br>(182 vs. n) | FoldChange[182] | p-<br>value[183] | MeanRatio<br>(183 vs. n) | FoldChange[183] | p-<br>value[184] | MeanRatio<br>(184 vs. n) | FoldChange[184] | p-<br>value[185] | MeanRatio<br>(185 vs. n) | FoldChange[185] | p-<br>value[186] | MeanRatio<br>(186 vs. n) | FoldChange[186] | p-<br>value[187] | MeanRatio<br>(187 vs. n) | FoldChange[187] | p-<br>value[188] | MeanRatio<br>(188 vs. n) | FoldChange[188] | p-<br>value[189] | MeanRatio<br>(189 vs. n) | FoldChange[189] | p-<br>value[190] | MeanRatio<br>(190 vs. n) | FoldChange[190] | p-<br>value[191] | MeanRatio<br>(191 vs. n) | FoldChange[191] | p-<br>value[192] | MeanRatio<br>(192 vs. n) | FoldChange[192] | p-<br>value[193] | MeanRatio<br>(193 vs. n) | FoldChange[193] | p-<br>value[194] | MeanRatio<br>(194 vs. n) | FoldChange[194] | p-<br>value[195] | MeanRatio<br>(195 vs. n) | FoldChange[195] | p-<br>value[196] | MeanRatio<br>(196 vs. n) | FoldChange[196] | p-<br>value[197] | MeanRatio<br>(197 vs. n) | FoldChange[197] | p-<br>value[198] | MeanRatio<br>(198 vs. n) | FoldChange[198] | p-<br>value[199] | MeanRatio<br>(199 vs. n) | FoldChange[199] | p-<br>value[200] | MeanRatio<br>(200 vs. n) | FoldChange[200] | p-<br>value[201] | MeanRatio<br>(201 vs. n) | FoldChange[201] | p-<br>value[202] | MeanRatio<br>(202 vs. n) | FoldChange[202] | p-<br>value[203] | MeanRatio<br>(203 vs. n) | FoldChange[203] | p-<br>value[204] | MeanRatio<br>(204 vs. n) | FoldChange[204] | p-<br>value[205] | MeanRatio<br>(205 vs. n) | FoldChange[205] | p-<br>value[206] | MeanRatio<br>(206 vs. n) | FoldChange[206] | p-<br>value[207] | MeanRatio<br>(207 vs. n) | FoldChange[207] | p-<br>value[208] | MeanRatio<br>(208 vs. n) | FoldChange[208] | p-<br>value[209] | MeanRatio<br>(209 vs. n) | FoldChange[209] | p-<br>value[210] | MeanRatio<br>(210 vs. n) | FoldChange[210] | p-<br>value[211] | MeanRatio<br>(211 vs. n) | FoldChange[211] | p-<br>value[212] | MeanRatio<br>(212 vs. n) | FoldChange[212] | p-<br>value[213] | MeanRatio<br>(213 vs. n) | FoldChange[213] | p-<br>value[214] | MeanRatio<br>(214 vs. n) | FoldChange[214] | p-<br>value[215] | MeanRatio<br>(215 vs. n) | FoldChange[215] | p-<br>value[216] | MeanRatio<br>(216 vs. n) | FoldChange[216] | p-<br>value[217] | MeanRatio<br>(217 vs. n) | FoldChange[217] | p-<br>value[218] | MeanRatio<br>(218 vs. n) | FoldChange[218] | p-<br>value[219] | MeanRatio<br>(219 vs. n) | FoldChange[219] | p-<br>value[220] | MeanRatio<br>(220 vs. n) | FoldChange[220] | p-<br>value[221] | MeanRatio<br>(221 vs. n) | FoldChange[221] | p-<br>value[222] | MeanRatio<br>(222 vs. n) | FoldChange[222] | p-<br>value[223] | MeanRatio<br>(223 vs. n) | FoldChange[223] | p-<br>value[224] | MeanRatio<br>(224 vs. n) | FoldChange[224] | p-<br>value[225] | MeanRatio<br>(225 vs. n) | FoldChange[225] | p-<br>value[226] | MeanRatio<br>(226 vs. n) | FoldChange[226] | p-<br>value[227] | MeanRatio<br>(227 vs. n) | FoldChange[227] | p-<br>value[228] | MeanRatio<br>(228 vs. n) | FoldChange[228] | p-<br>value[229] | MeanRatio<br>(229 vs. n) | FoldChange[229] | p-<br>value[230] | MeanRatio<br>(230 vs. n) | FoldChange[230] | p-<br>value[231] | MeanRatio<br>(231 vs. n) | FoldChange[231] | p-<br>value[232] | MeanRatio<br>(232 vs. n) | FoldChange[232] | p-<br>value[233] | MeanRatio<br>(233 vs. n) | FoldChange[233] | p-<br>value[234] | MeanRatio<br>(234 vs. n) | FoldChange[234] | p-<br>value[235] | MeanRatio<br>(235 vs. n) | FoldChange[235] | p-<br>value[236] | MeanRatio<br>(236 vs. n) | FoldChange[236] | p-<br>value[237] | MeanRatio<br>(237 vs. n) | FoldChange[237] | p-<br>value[238] | MeanRatio<br>(238 vs. n) | FoldChange[238] | p-<br>value[239] | MeanRatio<br>(239 vs. n) | FoldChange[239] | p-<br>value[240] | MeanRatio<br>(240 vs. n) | FoldChange[240] | p-<br>value[241] | MeanRatio<br>(241 vs. n) | FoldChange[241] | p-<br>value[242] | MeanRatio<br>(242 vs. n) | FoldChange[242] | p-<br>value[243] | MeanRatio<br>(243 vs. n) | FoldChange[243] | p-<br>value[244] | MeanRatio<br>(244 vs. n) | FoldChange[244] | p-<br>value[245] | MeanRatio<br>(245 vs. n) | FoldChange[245] | p-<br>value[246] | MeanRatio<br>(246 vs. n) | FoldChange[246] | p-<br>value[247] | MeanRatio<br>(247 vs. n) | FoldChange[247] | p-<br>value[248] | MeanRatio<br>(248 vs. n) | FoldChange[248] | p-<br>value[249] | MeanRatio<br>(249 vs. n) | FoldChange[249] | p-<br>value[250] | MeanRatio<br>(250 vs. n) | FoldChange[250] | p-<br>value[251] | MeanRatio<br>(251 vs. n) | FoldChange[251] | p-<br>value[252] | MeanRatio<br>(252 vs. n) | FoldChange[252] | p-<br>value[253] | MeanRatio<br>(253 vs. n) | FoldChange[253] | p-<br>value[254] | MeanRatio<br>(254 vs. n) | FoldChange[254] | p-<br>value[255] | MeanRatio<br>(255 vs. n) | FoldChange[255] | p-<br>value[256] | MeanRatio<br>(256 vs. n) | FoldChange[256] | p-<br>value[257] | MeanRatio<br>(257 vs. n) | FoldChange[257] | p-<br>value[258] | MeanRatio<br>(258 vs. n) | FoldChange[258] | p-<br>value[259] | MeanRatio<br>(259 vs. n) | FoldChange[259] | p-<br>value[260] | MeanRatio<br>(260 vs. n) | FoldChange[260] | p-<br>value[261] | MeanRatio<br>(261 vs. n) | FoldChange[261] | p-<br>value[262] | MeanRatio<br>(262 vs. n) | FoldChange[262] | p-<br>value[263] | MeanRatio<br>(263 vs. n) | FoldChange[263] | p-<br>value[264] | MeanRatio<br>(264 vs. n) | FoldChange[264] | p-<br>value[265] | MeanRatio<br>(265 vs. n) | FoldChange[265] | p-<br>value[266] | MeanRatio<br>(266 vs. n) | FoldChange[266] | p-<br>value[267] | MeanRatio<br>(267 vs. n) | FoldChange[267] | p-<br>value[268] | MeanRatio<br>(268 vs. n) | FoldChange[268] | p-<br>value[269] | MeanRatio<br>(269 vs. n) | FoldChange[269] | p-<br>value[270] | MeanRatio<br>(270 vs. n) | FoldChange[270] | p-<br>value[271] | MeanRatio<br>(271 vs. n) | FoldChange[271] | p-<br>value[272] |
|---------|------------------|--------------------------|-----------------|------------------|--------------------------|-----------------|------------------|--------------------------|-----------------|------------------|--------------------------|-----------------|------------------|--------------------------|-----------------|------------------|--------------------------|-----------------|------------------|--------------------------|-----------------|------------------|--------------------------|-----------------|------------------|--------------------------|-----------------|------------------|--------------------------|-----------------|------------------|--------------------------|-----------------|------------------|--------------------------|-----------------|------------------|--------------------------|-----------------|------------------|--------------------------|-----------------|------------------|--------------------------|-----------------|------------------|--------------------------|-----------------|------------------|--------------------------|-----------------|------------------|--------------------------|-----------------|------------------|--------------------------|-----------------|------------------|--------------------------|-----------------|------------------|--------------------------|-----------------|------------------|--------------------------|-----------------|------------------|--------------------------|-----------------|------------------|--------------------------|-----------------|------------------|--------------------------|-----------------|------------------|--------------------------|-----------------|------------------|--------------------------|-----------------|------------------|--------------------------|-----------------|------------------|--------------------------|-----------------|------------------|--------------------------|-----------------|------------------|--------------------------|-----------------|------------------|--------------------------|-----------------|------------------|--------------------------|-----------------|------------------|--------------------------|-----------------|------------------|--------------------------|-----------------|------------------|--------------------------|-----------------|------------------|--------------------------|-----------------|------------------|--------------------------|-----------------|------------------|--------------------------|-----------------|------------------|--------------------------|-----------------|------------------|--------------------------|-----------------|------------------|--------------------------|-----------------|------------------|--------------------------|-----------------|------------------|--------------------------|-----------------|------------------|--------------------------|-----------------|------------------|--------------------------|-----------------|------------------|--------------------------|-----------------|------------------|--------------------------|-----------------|------------------|--------------------------|-----------------|------------------|--------------------------|-----------------|------------------|--------------------------|-----------------|------------------|--------------------------|-----------------|------------------|--------------------------|-----------------|------------------|--------------------------|-----------------|------------------|--------------------------|-----------------|------------------|--------------------------|-----------------|------------------|--------------------------|-----------------|------------------|--------------------------|-----------------|------------------|--------------------------|-----------------|------------------|--------------------------|-----------------|------------------|--------------------------|-----------------|------------------|--------------------------|-----------------|------------------|--------------------------|-----------------|------------------|--------------------------|-----------------|------------------|--------------------------|-----------------|------------------|--------------------------|-----------------|------------------|--------------------------|-----------------|------------------|--------------------------|-----------------|------------------|--------------------------|-----------------|------------------|--------------------------|-----------------|------------------|--------------------------|-----------------|------------------|--------------------------|-----------------|------------------|--------------------------|-----------------|------------------|--------------------------|-----------------|------------------|--------------------------|-----------------|------------------|--------------------------|-----------------|------------------|--------------------------|-----------------|------------------|--------------------------|-----------------|------------------|--------------------------|-----------------|------------------|--------------------------|-----------------|------------------|--------------------------|-----------------|------------------|--------------------------|-----------------|------------------|--------------------------|-----------------|------------------|--------------------------|-----------------|------------------|--------------------------|-----------------|------------------|--------------------------|-----------------|------------------|--------------------------|-----------------|------------------|--------------------------|-----------------|------------------|--------------------------|-----------------|------------------|--------------------------|-----------------|------------------|--------------------------|-----------------|------------------|--------------------------|-----------------|------------------|--------------------------|-----------------|------------------|--------------------------|-----------------|------------------|--------------------------|-----------------|------------------|--------------------------|-----------------|------------------|--------------------------|-----------------|------------------|--------------------------|-----------------|------------------|--------------------------|-----------------|------------------|--------------------------|-----------------|------------------|--------------------------|-----------------|------------------|--------------------------|-----------------|------------------|--------------------------|-----------------|------------------|--------------------------|-----------------|------------------|--------------------------|-----------------|------------------|--------------------------|-----------------|------------------|--------------------------|-----------------|------------------|--------------------------|-----------------|------------------|--------------------------|-----------------|------------------|--------------------------|-----------------|------------------|--------------------------|-----------------|------------------|--------------------------|-----------------|------------------|--------------------------|-----------------|------------------|--------------------------|-----------------|------------------|--------------------------|-----------------|------------------|--------------------------|-----------------|------------------|--------------------------|-----------------|------------------|--------------------------|-----------------|------------------|--------------------------|-----------------|------------------|--------------------------|-----------------|------------------|--------------------------|-----------------|------------------|--------------------------|-----------------|------------------|--------------------------|-----------------|------------------|--------------------------|-----------------|------------------|--------------------------|-----------------|------------------|--------------------------|-----------------|------------------|--------------------------|-----------------|------------------|--------------------------|-----------------|------------------|--------------------------|-----------------|------------------|--------------------------|-----------------|------------------|--------------------------|-----------------|------------------|--------------------------|-----------------|------------------|--------------------------|-----------------|------------------|--------------------------|-----------------|------------------|--------------------------|-----------------|------------------|--------------------------|-----------------|------------------|--------------------------|-----------------|------------------|--------------------------|-----------------|------------------|--------------------------|-----------------|------------------|--------------------------|-----------------|------------------|--------------------------|-----------------|------------------|--------------------------|-----------------|------------------|--------------------------|-----------------|------------------|--------------------------|-----------------|------------------|--------------------------|-----------------|------------------|--------------------------|-----------------|------------------|--------------------------|-----------------|------------------|--------------------------|-----------------|------------------|--------------------------|-----------------|------------------|--------------------------|-----------------|------------------|--------------------------|-----------------|------------------|--------------------------|-----------------|------------------|--------------------------|-----------------|------------------|--------------------------|-----------------|------------------|--------------------------|-----------------|------------------|--------------------------|-----------------|------------------|--------------------------|-----------------|------------------|--------------------------|-----------------|------------------|--------------------------|-----------------|------------------|--------------------------|-----------------|------------------|--------------------------|-----------------|------------------|--------------------------|-----------------|------------------|--------------------------|-----------------|------------------|--------------------------|-----------------|------------------|--------------------------|-----------------|------------------|--------------------------|-----------------|------------------|
|---------|------------------|--------------------------|-----------------|------------------|--------------------------|-----------------|------------------|--------------------------|-----------------|------------------|--------------------------|-----------------|------------------|--------------------------|-----------------|------------------|--------------------------|-----------------|------------------|--------------------------|-----------------|------------------|--------------------------|-----------------|------------------|--------------------------|-----------------|------------------|--------------------------|-----------------|------------------|--------------------------|-----------------|------------------|--------------------------|-----------------|------------------|--------------------------|-----------------|------------------|--------------------------|-----------------|------------------|--------------------------|-----------------|------------------|--------------------------|-----------------|------------------|--------------------------|-----------------|------------------|--------------------------|-----------------|------------------|--------------------------|-----------------|------------------|--------------------------|-----------------|------------------|--------------------------|-----------------|------------------|--------------------------|-----------------|------------------|--------------------------|-----------------|------------------|--------------------------|-----------------|------------------|--------------------------|-----------------|------------------|--------------------------|-----------------|------------------|--------------------------|-----------------|------------------|--------------------------|-----------------|------------------|--------------------------|-----------------|------------------|--------------------------|-----------------|------------------|--------------------------|-----------------|------------------|--------------------------|-----------------|------------------|--------------------------|-----------------|------------------|--------------------------|-----------------|------------------|--------------------------|-----------------|------------------|--------------------------|-----------------|------------------|--------------------------|-----------------|------------------|--------------------------|-----------------|------------------|--------------------------|-----------------|------------------|--------------------------|-----------------|------------------|--------------------------|-----------------|------------------|--------------------------|-----------------|------------------|--------------------------|-----------------|------------------|--------------------------|-----------------|------------------|--------------------------|-----------------|------------------|--------------------------|-----------------|------------------|--------------------------|-----------------|------------------|--------------------------|-----------------|------------------|--------------------------|-----------------|------------------|--------------------------|-----------------|------------------|--------------------------|-----------------|------------------|--------------------------|-----------------|------------------|--------------------------|-----------------|------------------|--------------------------|-----------------|------------------|--------------------------|-----------------|------------------|--------------------------|-----------------|------------------|--------------------------|-----------------|------------------|--------------------------|-----------------|------------------|--------------------------|-----------------|------------------|--------------------------|-----------------|------------------|--------------------------|-----------------|------------------|--------------------------|-----------------|------------------|--------------------------|-----------------|------------------|--------------------------|-----------------|------------------|--------------------------|-----------------|------------------|--------------------------|-----------------|------------------|--------------------------|-----------------|------------------|--------------------------|-----------------|------------------|--------------------------|-----------------|------------------|--------------------------|-----------------|------------------|--------------------------|-----------------|------------------|--------------------------|-----------------|------------------|--------------------------|-----------------|------------------|--------------------------|-----------------|------------------|--------------------------|-----------------|------------------|--------------------------|-----------------|------------------|--------------------------|-----------------|------------------|--------------------------|-----------------|------------------|--------------------------|-----------------|------------------|--------------------------|-----------------|------------------|--------------------------|-----------------|------------------|--------------------------|-----------------|------------------|--------------------------|-----------------|------------------|--------------------------|-----------------|------------------|--------------------------|-----------------|------------------|--------------------------|-----------------|------------------|--------------------------|-----------------|------------------|--------------------------|-----------------|------------------|--------------------------|-----------------|------------------|--------------------------|-----------------|------------------|--------------------------|-----------------|------------------|--------------------------|-----------------|------------------|--------------------------|-----------------|------------------|--------------------------|-----------------|------------------|--------------------------|-----------------|------------------|--------------------------|-----------------|------------------|--------------------------|-----------------|------------------|--------------------------|-----------------|------------------|--------------------------|-----------------|------------------|--------------------------|-----------------|------------------|--------------------------|-----------------|------------------|--------------------------|-----------------|------------------|--------------------------|-----------------|------------------|--------------------------|-----------------|------------------|--------------------------|-----------------|------------------|--------------------------|-----------------|------------------|--------------------------|-----------------|------------------|--------------------------|-----------------|------------------|--------------------------|-----------------|------------------|--------------------------|-----------------|------------------|--------------------------|-----------------|------------------|--------------------------|-----------------|------------------|--------------------------|-----------------|------------------|--------------------------|-----------------|------------------|--------------------------|-----------------|------------------|--------------------------|-----------------|------------------|--------------------------|-----------------|------------------|--------------------------|-----------------|------------------|--------------------------|-----------------|------------------|--------------------------|-----------------|------------------|--------------------------|-----------------|------------------|--------------------------|-----------------|------------------|--------------------------|-----------------|------------------|--------------------------|-----------------|------------------|--------------------------|-----------------|------------------|--------------------------|-----------------|------------------|--------------------------|-----------------|------------------|--------------------------|-----------------|------------------|--------------------------|-----------------|------------------|--------------------------|-----------------|------------------|--------------------------|-----------------|------------------|--------------------------|-----------------|------------------|--------------------------|-----------------|------------------|--------------------------|-----------------|------------------|--------------------------|-----------------|------------------|--------------------------|-----------------|------------------|--------------------------|-----------------|------------------|--------------------------|-----------------|------------------|--------------------------|-----------------|------------------|--------------------------|-----------------|------------------|--------------------------|-----------------|------------------|--------------------------|-----------------|------------------|--------------------------|-----------------|------------------|--------------------------|-----------------|------------------|--------------------------|-----------------|------------------|--------------------------|-----------------|------------------|--------------------------|-----------------|------------------|--------------------------|-----------------|------------------|--------------------------|-----------------|------------------|--------------------------|-----------------|------------------|--------------------------|-----------------|------------------|--------------------------|-----------------|------------------|--------------------------|-----------------|------------------|--------------------------|-----------------|------------------|--------------------------|-----------------|------------------|--------------------------|-----------------|------------------|--------------------------|-----------------|------------------|--------------------------|-----------------|------------------|--------------------------|-----------------|------------------|--------------------------|-----------------|------------------|--------------------------|-----------------|------------------|--------------------------|-----------------|------------------|--------------------------|-----------------|------------------|--------------------------|-----------------|------------------|--------------------------|-----------------|------------------|--------------------------|-----------------|------------------|



File: ESM\_10 (Online Resource 10)

Title: Comparative Multidimensional Molecular Analyses of Pediatric Diffuse Intrinsic Pontine Gliomas Reveals Distinct Molecular Subtypes

Journal: Acta Neuropathologica

Authors: Amanda M. Senn, Madhuri Kumbhakar, Konrad Snyder, Sidick J. Yadhav, Joe Devenay, Brennan Harmon, Jordan Hall, Eric H. Ruabe, Ping An, Melanie Weingart, Brian Reid, Sarah Magge, Roger J. Packer, Javad Nazarian

Corresponding Author:

Javad Nazarian, Children's National Medical Center, Center for Genetic Medicine

111 Michigan Ave., NW, Washington DC, 20010

Phone: 202-476-6022 Fax: 202-476-6014

Email: J.Nazarian@CNMC.org

| Gene ID | P-<br>value[106] | Meanaratio<br>(106 vs. n) | FoldChange[106] | n | p-<br>value[111] | Meanaratio<br>(111 vs. n) | FoldChange[111] | n | p-<br>value[112] | Meanaratio<br>(112 vs. n) | FoldChange[112] | n | p-<br>value[121] | Meanaratio<br>(121 vs. n) | FoldChange[121] | p-<br>value[137] | Meanaratio<br>(137 vs. n) | FoldChange[137] | p-<br>value[153] | Meanaratio<br>(153 vs. n) | FoldChange[153] | p-<br>value[157] | Meanaratio<br>(157 vs. n) | FoldChange[157] | p-<br>value[163] | Meanaratio<br>(163 vs. n) | FoldChange[163] | p-<br>value[165] | Meanaratio<br>(165 vs. n) | FoldChange[165] | p-<br>value[172] | Meanaratio<br>(172 vs. n) | FoldChange[172] | p-<br>value[173] | Meanaratio<br>(173 vs. n) | FoldChange[173] | p-<br>value[174] | Meanaratio<br>(174 vs. n) | FoldChange[174] | p-<br>value[175] | Meanaratio<br>(175 vs. n) | FoldChange[175] | p-<br>value[176] | Meanaratio<br>(176 vs. n) | FoldChange[176] | p-<br>value[177] | Meanaratio<br>(177 vs. n) | FoldChange[177] | p-<br>value[178] | Meanaratio<br>(178 vs. n) | FoldChange[178] | p-<br>value[179] | Meanaratio<br>(179 vs. n) | FoldChange[179] | p-<br>value[180] | Meanaratio<br>(180 vs. n) | FoldChange[180] | p-<br>value[181] | Meanaratio<br>(181 vs. n) | FoldChange[181] | p-<br>value[182] | Meanaratio<br>(182 vs. n) | FoldChange[182] | p-<br>value[183] | Meanaratio<br>(183 vs. n) | FoldChange[183] | p-<br>value[184] | Meanaratio<br>(184 vs. n) | FoldChange[184] | p-<br>value[185] | Meanaratio<br>(185 vs. n) | FoldChange[185] | p-<br>value[186] | Meanaratio<br>(186 vs. n) | FoldChange[186] | p-<br>value[187] | Meanaratio<br>(187 vs. n) | FoldChange[187] | p-<br>value[188] | Meanaratio<br>(188 vs. n) | FoldChange[188] | p-<br>value[189] | Meanaratio<br>(189 vs. n) | FoldChange[189] | p-<br>value[190] | Meanaratio<br>(190 vs. n) | FoldChange[190] | p-<br>value[191] | Meanaratio<br>(191 vs. n) | FoldChange[191] | p-<br>value[192] | Meanaratio<br>(192 vs. n) | FoldChange[192] | p-<br>value[193] | Meanaratio<br>(193 vs. n) | FoldChange[193] | p-<br>value[194] | Meanaratio<br>(194 vs. n) | FoldChange[194] | p-<br>value[195] | Meanaratio<br>(195 vs. n) | FoldChange[195] | p-<br>value[196] | Meanaratio<br>(196 vs. n) | FoldChange[196] | p-<br>value[197] | Meanaratio<br>(197 vs. n) | FoldChange[197] | p-<br>value[198] | Meanaratio<br>(198 vs. n) | FoldChange[198] | p-<br>value[199] | Meanaratio<br>(199 vs. n) | FoldChange[199] | p-<br>value[200] | Meanaratio<br>(200 vs. n) | FoldChange[200] | p-<br>value[201] | Meanaratio<br>(201 vs. n) | FoldChange[201] | p-<br>value[202] | Meanaratio<br>(202 vs. n) | FoldChange[202] | p-<br>value[203] | Meanaratio<br>(203 vs. n) | FoldChange[203] | p-<br>value[204] | Meanaratio<br>(204 vs. n) | FoldChange[204] | p-<br>value[205] | Meanaratio<br>(205 vs. n) | FoldChange[205] | p-<br>value[206] | Meanaratio<br>(206 vs. n) | FoldChange[206] | p-<br>value[207] | Meanaratio<br>(207 vs. n) | FoldChange[207] | p-<br>value[208] | Meanaratio<br>(208 vs. n) | FoldChange[208] | p-<br>value[209] | Meanaratio<br>(209 vs. n) | FoldChange[209] | p-<br>value[210] | Meanaratio<br>(210 vs. n) | FoldChange[210] | p-<br>value[211] | Meanaratio<br>(211 vs. n) | FoldChange[211] | p-<br>value[212] | Meanaratio<br>(212 vs. n) | FoldChange[212] | p-<br>value[213] | Meanaratio<br>(213 vs. n) | FoldChange[213] | p-<br>value[214] | Meanaratio<br>(214 vs. n) | FoldChange[214] | p-<br>value[215] | Meanaratio<br>(215 vs. n) | FoldChange[215] | p-<br>value[216] | Meanaratio<br>(216 vs. n) | FoldChange[216] | p-<br>value[217] | Meanaratio<br>(217 vs. n) | FoldChange[217] | p-<br>value[218] | Meanaratio<br>(218 vs. n) | FoldChange[218] | p-<br>value[219] | Meanaratio<br>(219 vs. n) | FoldChange[219] | p-<br>value[220] | Meanaratio<br>(220 vs. n) | FoldChange[220] | p-<br>value[221] | Meanaratio<br>(221 vs. n) | FoldChange[221] | p-<br>value[222] | Meanaratio<br>(222 vs. n) | FoldChange[222] | p-<br>value[223] | Meanaratio<br>(223 vs. n) | FoldChange[223] | p-<br>value[224] | Meanaratio<br>(224 vs. n) | FoldChange[224] | p-<br>value[225] | Meanaratio<br>(225 vs. n) | FoldChange[225] | p-<br>value[226] | Meanaratio<br>(226 vs. n) | FoldChange[226] | p-<br>value[227] | Meanaratio<br>(227 vs. n) | FoldChange[227] | p-<br>value[228] | Meanaratio<br>(228 vs. n) | FoldChange[228] | p-<br>value[229] | Meanaratio<br>(229 vs. n) | FoldChange[229] | p-<br>value[230] | Meanaratio<br>(230 vs. n) | FoldChange[230] | p-<br>value[231] | Meanaratio<br>(231 vs. n) | FoldChange[231] | p-<br>value[232] | Meanaratio<br>(232 vs. n) | FoldChange[232] | p-<br>value[233] | Meanaratio<br>(233 vs. n) | FoldChange[233] | p-<br>value[234] | Meanaratio<br>(234 vs. n) | FoldChange[234] | p-<br>value[235] | Meanaratio<br>(235 vs. n) | FoldChange[235] | p-<br>value[236] | Meanaratio<br>(236 vs. n) | FoldChange[236] | p-<br>value[237] | Meanaratio<br>(237 vs. n) | FoldChange[237] | p-<br>value[238] | Meanaratio<br>(238 vs. n) | FoldChange[238] | p-<br>value[239] | Meanaratio<br>(239 vs. n) | FoldChange[239] | p-<br>value[240] | Meanaratio<br>(240 vs. n) | FoldChange[240] | p-<br>value[241] | Meanaratio<br>(241 vs. n) | FoldChange[241] | p-<br>value[242] | Meanaratio<br>(242 vs. n) | FoldChange[242] | p-<br>value[243] | Meanaratio<br>(243 vs. n) | FoldChange[243] | p-<br>value[244] | Meanaratio<br>(244 vs. n) | FoldChange[244] | p-<br>value[245] | Meanaratio<br>(245 vs. n) | FoldChange[245] | p-<br>value[246] | Meanaratio<br>(246 vs. n) | FoldChange[246] | p-<br>value[247] | Meanaratio<br>(247 vs. n) | FoldChange[247] | p-<br>value[248] | Meanaratio<br>(248 vs. n) | FoldChange[248] | p-<br>value[249] | Meanaratio<br>(249 vs. n) | FoldChange[249] | p-<br>value[250] | Meanaratio<br>(250 vs. n) | FoldChange[250] | p-<br>value[251] | Meanaratio<br>(251 vs. n) | FoldChange[251] | p-<br>value[252] | Meanaratio<br>(252 vs. n) | FoldChange[252] | p-<br>value[253] | Meanaratio<br>(253 vs. n) | FoldChange[253] | p-<br>value[254] | Meanaratio<br>(254 vs. n) | FoldChange[254] | p-<br>value[255] | Meanaratio<br>(255 vs. n) | FoldChange[255] | p-<br>value[256] | Meanaratio<br>(256 vs. n) | FoldChange[256] | p-<br>value[257] | Meanaratio<br>(257 vs. n) | FoldChange[257] | p-<br>value[258] | Meanaratio<br>(258 vs. n) | FoldChange[258] | p-<br>value[259] | Meanaratio<br>(259 vs. n) | FoldChange[259] | p-<br>value[260] | Meanaratio<br>(260 vs. n) | FoldChange[260] | p-<br>value[261] | Meanaratio<br>(261 vs. n) | FoldChange[261] | p-<br>value[262] | Meanaratio<br>(262 vs. n) | FoldChange[262] | p-<br>value[263] | Meanaratio<br>(263 vs. n) | FoldChange[263] | p-<br>value[264] | Meanaratio<br>(264 vs. n) | FoldChange[264] | p-<br>value[265] | Meanaratio<br>(265 vs. n) | FoldChange[265] | p-<br>value[266] | Meanaratio<br>(266 vs. n) | FoldChange[266] | p-<br>value[267] | Meanaratio<br>(267 vs. n) | FoldChange[267] | p-<br>value[268] | Meanaratio<br>(268 vs. n) | FoldChange[268] | p-<br>value[269] | Meanaratio<br>(269 vs. n) | FoldChange[269] | p-<br>value[270] | Meanaratio<br>(270 vs. n) | FoldChange[270] | p-<br>value[271] | Meanaratio<br>(271 vs. n) | FoldChange[271] | p-<br>value[272] | Meanaratio<br>(272 vs. n) | FoldChange[272] | p-<br>value[273] | Meanaratio<br>(273 vs. n) | FoldChange[273] | p-<br>value[274] | Meanaratio<br>(274 vs. n) | FoldChange[274] | p-<br>value[275] | Meanaratio<br>(275 vs. n) | FoldChange[275] | p-<br>value[276] | Meanaratio<br>(276 vs. n) | FoldChange[276] | p-<br>value[277] | Meanaratio<br>(277 vs. n) | FoldChange[277] | p-<br>value[278] | Meanaratio<br>(278 vs. n) | FoldChange[278] | p-<br>value[279] | Meanaratio<br>(279 vs. n) | FoldChange[279] | p-<br>value[280] | Meanaratio<br>(280 vs. n) | FoldChange[280] | p-<br>value[281] | Meanaratio<br>(281 vs. n) | FoldChange[281] | p-<br>value[282] | Meanaratio<br>(282 vs. n) | FoldChange[282] | p-<br>value[283] | Meanaratio<br>(283 vs. n) | FoldChange[283] | p-<br>value[284] | Meanaratio<br>(284 vs. n) | FoldChange[284] | p-<br>value[285] | Meanaratio<br>(285 vs. n) | FoldChange[285] | p-<br>value[286] | Meanaratio<br>(286 vs. n) | FoldChange[286] | p-<br>value[287] | Meanaratio<br>(287 vs. n) | FoldChange[287] | p-<br>value[288] | Meanaratio<br>(288 vs. n) | FoldChange[288] | p-<br>value[289] | Meanaratio<br>(289 vs. n) | FoldChange[289] | p-<br>value[290] | Meanaratio<br>(290 vs. n) | FoldChange[290] | p-<br>value[291] | Meanaratio<br>(291 vs. n) | FoldChange[291] | p-<br>value[292] | Meanaratio<br>(292 vs. n) | FoldChange[292] | p-<br>value[293] | Meanaratio<br>(293 vs. n) | FoldChange[293] | p-<br>value[294] | Meanaratio<br>(294 vs. n) | FoldChange[294] | p-<br>value[295] | Meanaratio<br>(295 vs. n) | FoldChange[295] | p-<br>value[296] | Meanaratio<br>(296 vs. n) | FoldChange[296] | p-<br>value[297] | Meanaratio<br>(297 vs. n) | FoldChange[297] | p-<br>value[298] | Meanaratio<br>(298 vs. n) | FoldChange[298] | p-<br>value[299] | Meanaratio<br>(299 vs. n) | FoldChange[299] | p-<br>value[300] | Meanaratio<br>(300 vs. n) | FoldChange[300] | p-<br>value[301] | Meanaratio<br>(301 vs. n) | FoldChange[301] | p-<br>value[302] | Meanaratio<br>(302 vs. n) | FoldChange[302] | p-<br>value[303] | Meanaratio<br>(303 vs. n) | FoldChange[303] | p-<br>value[304] | Meanaratio<br>(304 vs. n) | FoldChange[304] | p-<br>value[305] | Meanaratio<br>(305 vs. n) | FoldChange[305] | p-<br>value[306] | Meanaratio<br>(306 vs. n) | FoldChange[306] | p-<br>value[307] | Meanaratio<br>(307 vs. n) | FoldChange[307] | p-<br>value[308] | Meanaratio<br>(308 vs. n) | FoldChange[308] | p-<br>value[309] | Meanaratio<br>(309 vs. n) | FoldChange[309] | p-<br>value[310] | Meanaratio<br>(310 vs. n) | FoldChange[310] | p-<br>value[311] | Meanaratio<br>(311 vs. n) | FoldChange[311] | p-<br>value[312] | Meanaratio<br>(312 vs. n) | FoldChange[312] | p-<br>value[313] | Meanaratio<br>(313 vs. n) | FoldChange[313] | p-<br>value[314] | Meanaratio<br>(314 vs. n) | FoldChange[314] | p-<br>value[315] | Meanaratio<br>(315 vs. n) | FoldChange[315] | p-<br>value[316] | Meanaratio<br>(316 vs. n) | FoldChange[316] | p-<br>value[317] | Meanaratio<br>(317 vs. n) | FoldChange[317] | p-<br>value[318] | Meanaratio<br>(318 vs. n) | FoldChange[318] | p-<br>value[319] | Meanaratio<br>(319 vs. n) | FoldChange[319] | p-<br>value[320] | Meanaratio<br>(320 vs. n) | FoldChange[320] | p-<br>value[321] | Meanaratio<br>(321 vs. n) | FoldChange[321] | p-<br>value[322] | Meanaratio<br>(322 vs. n) | FoldChange[322] | p-<br>value[323] | Meanaratio<br>(323 vs. n) | FoldChange[323] | p-<br>value[324] | Meanaratio<br>(324 vs. n) |
|---------|------------------|---------------------------|-----------------|---|------------------|---------------------------|-----------------|---|------------------|---------------------------|-----------------|---|------------------|---------------------------|-----------------|------------------|---------------------------|-----------------|------------------|---------------------------|-----------------|------------------|---------------------------|-----------------|------------------|---------------------------|-----------------|------------------|---------------------------|-----------------|------------------|---------------------------|-----------------|------------------|---------------------------|-----------------|------------------|---------------------------|-----------------|------------------|---------------------------|-----------------|------------------|---------------------------|-----------------|------------------|---------------------------|-----------------|------------------|---------------------------|-----------------|------------------|---------------------------|-----------------|------------------|---------------------------|-----------------|------------------|---------------------------|-----------------|------------------|---------------------------|-----------------|------------------|---------------------------|-----------------|------------------|---------------------------|-----------------|------------------|---------------------------|-----------------|------------------|---------------------------|-----------------|------------------|---------------------------|-----------------|------------------|---------------------------|-----------------|------------------|---------------------------|-----------------|------------------|---------------------------|-----------------|------------------|---------------------------|-----------------|------------------|---------------------------|-----------------|------------------|---------------------------|-----------------|------------------|---------------------------|-----------------|------------------|---------------------------|-----------------|------------------|---------------------------|-----------------|------------------|---------------------------|-----------------|------------------|---------------------------|-----------------|------------------|---------------------------|-----------------|------------------|---------------------------|-----------------|------------------|---------------------------|-----------------|------------------|---------------------------|-----------------|------------------|---------------------------|-----------------|------------------|---------------------------|-----------------|------------------|---------------------------|-----------------|------------------|---------------------------|-----------------|------------------|---------------------------|-----------------|------------------|---------------------------|-----------------|------------------|---------------------------|-----------------|------------------|---------------------------|-----------------|------------------|---------------------------|-----------------|------------------|---------------------------|-----------------|------------------|---------------------------|-----------------|------------------|---------------------------|-----------------|------------------|---------------------------|-----------------|------------------|---------------------------|-----------------|------------------|---------------------------|-----------------|------------------|---------------------------|-----------------|------------------|---------------------------|-----------------|------------------|---------------------------|-----------------|------------------|---------------------------|-----------------|------------------|---------------------------|-----------------|------------------|---------------------------|-----------------|------------------|---------------------------|-----------------|------------------|---------------------------|-----------------|------------------|---------------------------|-----------------|------------------|---------------------------|-----------------|------------------|---------------------------|-----------------|------------------|---------------------------|-----------------|------------------|---------------------------|-----------------|------------------|---------------------------|-----------------|------------------|---------------------------|-----------------|------------------|---------------------------|-----------------|------------------|---------------------------|-----------------|------------------|---------------------------|-----------------|------------------|---------------------------|-----------------|------------------|---------------------------|-----------------|------------------|---------------------------|-----------------|------------------|---------------------------|-----------------|------------------|---------------------------|-----------------|------------------|---------------------------|-----------------|------------------|---------------------------|-----------------|------------------|---------------------------|-----------------|------------------|---------------------------|-----------------|------------------|---------------------------|-----------------|------------------|---------------------------|-----------------|------------------|---------------------------|-----------------|------------------|---------------------------|-----------------|------------------|---------------------------|-----------------|------------------|---------------------------|-----------------|------------------|---------------------------|-----------------|------------------|---------------------------|-----------------|------------------|---------------------------|-----------------|------------------|---------------------------|-----------------|------------------|---------------------------|-----------------|------------------|---------------------------|-----------------|------------------|---------------------------|-----------------|------------------|---------------------------|-----------------|------------------|---------------------------|-----------------|------------------|---------------------------|-----------------|------------------|---------------------------|-----------------|------------------|---------------------------|-----------------|------------------|---------------------------|-----------------|------------------|---------------------------|-----------------|------------------|---------------------------|-----------------|------------------|---------------------------|-----------------|------------------|---------------------------|-----------------|------------------|---------------------------|-----------------|------------------|---------------------------|-----------------|------------------|---------------------------|-----------------|------------------|---------------------------|-----------------|------------------|---------------------------|-----------------|------------------|---------------------------|-----------------|------------------|---------------------------|-----------------|------------------|---------------------------|-----------------|------------------|---------------------------|-----------------|------------------|---------------------------|-----------------|------------------|---------------------------|-----------------|------------------|---------------------------|-----------------|------------------|---------------------------|-----------------|------------------|---------------------------|-----------------|------------------|---------------------------|-----------------|------------------|---------------------------|-----------------|------------------|---------------------------|-----------------|------------------|---------------------------|-----------------|------------------|---------------------------|-----------------|------------------|---------------------------|-----------------|------------------|---------------------------|-----------------|------------------|---------------------------|-----------------|------------------|---------------------------|-----------------|------------------|---------------------------|-----------------|------------------|---------------------------|-----------------|------------------|---------------------------|-----------------|------------------|---------------------------|-----------------|------------------|---------------------------|-----------------|------------------|---------------------------|-----------------|------------------|---------------------------|-----------------|------------------|---------------------------|-----------------|------------------|---------------------------|-----------------|------------------|---------------------------|-----------------|------------------|---------------------------|-----------------|------------------|---------------------------|-----------------|------------------|---------------------------|-----------------|------------------|---------------------------|-----------------|------------------|---------------------------|-----------------|------------------|---------------------------|-----------------|------------------|---------------------------|-----------------|------------------|---------------------------|-----------------|------------------|---------------------------|-----------------|------------------|---------------------------|-----------------|------------------|---------------------------|-----------------|------------------|---------------------------|-----------------|------------------|---------------------------|-----------------|------------------|---------------------------|-----------------|------------------|---------------------------|-----------------|------------------|---------------------------|-----------------|------------------|---------------------------|-----------------|------------------|---------------------------|-----------------|------------------|---------------------------|-----------------|------------------|---------------------------|-----------------|------------------|---------------------------|-----------------|------------------|---------------------------|-----------------|------------------|---------------------------|-----------------|------------------|---------------------------|
|---------|------------------|---------------------------|-----------------|---|------------------|---------------------------|-----------------|---|------------------|---------------------------|-----------------|---|------------------|---------------------------|-----------------|------------------|---------------------------|-----------------|------------------|---------------------------|-----------------|------------------|---------------------------|-----------------|------------------|---------------------------|-----------------|------------------|---------------------------|-----------------|------------------|---------------------------|-----------------|------------------|---------------------------|-----------------|------------------|---------------------------|-----------------|------------------|---------------------------|-----------------|------------------|---------------------------|-----------------|------------------|---------------------------|-----------------|------------------|---------------------------|-----------------|------------------|---------------------------|-----------------|------------------|---------------------------|-----------------|------------------|---------------------------|-----------------|------------------|---------------------------|-----------------|------------------|---------------------------|-----------------|------------------|---------------------------|-----------------|------------------|---------------------------|-----------------|------------------|---------------------------|-----------------|------------------|---------------------------|-----------------|------------------|---------------------------|-----------------|------------------|---------------------------|-----------------|------------------|---------------------------|-----------------|------------------|---------------------------|-----------------|------------------|---------------------------|-----------------|------------------|---------------------------|-----------------|------------------|---------------------------|-----------------|------------------|---------------------------|-----------------|------------------|---------------------------|-----------------|------------------|---------------------------|-----------------|------------------|---------------------------|-----------------|------------------|---------------------------|-----------------|------------------|---------------------------|-----------------|------------------|---------------------------|-----------------|------------------|---------------------------|-----------------|------------------|---------------------------|-----------------|------------------|---------------------------|-----------------|------------------|---------------------------|-----------------|------------------|---------------------------|-----------------|------------------|---------------------------|-----------------|------------------|---------------------------|-----------------|------------------|---------------------------|-----------------|------------------|---------------------------|-----------------|------------------|---------------------------|-----------------|------------------|---------------------------|-----------------|------------------|---------------------------|-----------------|------------------|---------------------------|-----------------|------------------|---------------------------|-----------------|------------------|---------------------------|-----------------|------------------|---------------------------|-----------------|------------------|---------------------------|-----------------|------------------|---------------------------|-----------------|------------------|---------------------------|-----------------|------------------|---------------------------|-----------------|------------------|---------------------------|-----------------|------------------|---------------------------|-----------------|------------------|---------------------------|-----------------|------------------|---------------------------|-----------------|------------------|---------------------------|-----------------|------------------|---------------------------|-----------------|------------------|---------------------------|-----------------|------------------|---------------------------|-----------------|------------------|---------------------------|-----------------|------------------|---------------------------|-----------------|------------------|---------------------------|-----------------|------------------|---------------------------|-----------------|------------------|---------------------------|-----------------|------------------|---------------------------|-----------------|------------------|---------------------------|-----------------|------------------|---------------------------|-----------------|------------------|---------------------------|-----------------|------------------|---------------------------|-----------------|------------------|---------------------------|-----------------|------------------|---------------------------|-----------------|------------------|---------------------------|-----------------|------------------|---------------------------|-----------------|------------------|---------------------------|-----------------|------------------|---------------------------|-----------------|------------------|---------------------------|-----------------|------------------|---------------------------|-----------------|------------------|---------------------------|-----------------|------------------|---------------------------|-----------------|------------------|---------------------------|-----------------|------------------|---------------------------|-----------------|------------------|---------------------------|-----------------|------------------|---------------------------|-----------------|------------------|---------------------------|-----------------|------------------|---------------------------|-----------------|------------------|---------------------------|-----------------|------------------|---------------------------|-----------------|------------------|---------------------------|-----------------|------------------|---------------------------|-----------------|------------------|---------------------------|-----------------|------------------|---------------------------|-----------------|------------------|---------------------------|-----------------|------------------|---------------------------|-----------------|------------------|---------------------------|-----------------|------------------|---------------------------|-----------------|------------------|---------------------------|-----------------|------------------|---------------------------|-----------------|------------------|---------------------------|-----------------|------------------|---------------------------|-----------------|------------------|---------------------------|-----------------|------------------|---------------------------|-----------------|------------------|---------------------------|-----------------|------------------|---------------------------|-----------------|------------------|---------------------------|-----------------|------------------|---------------------------|-----------------|------------------|---------------------------|-----------------|------------------|---------------------------|-----------------|------------------|---------------------------|-----------------|------------------|---------------------------|-----------------|------------------|---------------------------|-----------------|------------------|---------------------------|-----------------|------------------|---------------------------|-----------------|------------------|---------------------------|-----------------|------------------|---------------------------|-----------------|------------------|---------------------------|-----------------|------------------|---------------------------|-----------------|------------------|---------------------------|-----------------|------------------|---------------------------|-----------------|------------------|---------------------------|-----------------|------------------|---------------------------|-----------------|------------------|---------------------------|-----------------|------------------|---------------------------|-----------------|------------------|---------------------------|-----------------|------------------|---------------------------|-----------------|------------------|---------------------------|-----------------|------------------|---------------------------|-----------------|------------------|---------------------------|-----------------|------------------|---------------------------|-----------------|------------------|---------------------------|-----------------|------------------|---------------------------|-----------------|------------------|---------------------------|-----------------|------------------|---------------------------|-----------------|------------------|---------------------------|-----------------|------------------|---------------------------|-----------------|------------------|---------------------------|-----------------|------------------|---------------------------|-----------------|------------------|---------------------------|-----------------|------------------|---------------------------|-----------------|------------------|---------------------------|-----------------|------------------|---------------------------|-----------------|------------------|---------------------------|-----------------|------------------|---------------------------|-----------------|------------------|---------------------------|-----------------|------------------|---------------------------|-----------------|------------------|---------------------------|-----------------|------------------|---------------------------|-----------------|------------------|---------------------------|-----------------|------------------|---------------------------|-----------------|------------------|---------------------------|-----------------|------------------|---------------------------|-----------------|------------------|---------------------------|-----------------|------------------|---------------------------|-----------------|------------------|---------------------------|-----------------|------------------|---------------------------|



File: ESM\_10 (Online Resource 10)

**Title:** Comparison of Multidimensional Molecular Analyses of Pediatric Diffuse Intrinsic Gliomas Reveals Distinct Molecular Subtypes  
**Journal:** Acta Neuropathologica

**Authors:** Amanda M. Stransik, Madhuri Kumbhakar, Kendall Snyder, Sidicki Yavitse, Joe Devenney, Brennan Harmon, Jordan Hall, Eric H. Rubie, Ping An, Melanie Weingart, Brian Reid, Sarah Magee, Roger J. Packer, Javad Nazarian

**Corresponding Author:**

Javad Nazarian, Children's National Medical Center, Center for Genetic Medicine  
111 Michigan Ave., NW, Washington DC, 20010  
Phone: 202-476-6022 Fax: 202-476-6014  
Email: Nazarian@CNMC.org

| Gene ID | P | FolChang106 |  | p | FolChang107 |  | p | FolChang110 |  | p | FolChang111 |  | p | FolChang112 |  | p | FolChang121 |  | p | FolChang122 |  | p | FolChang1347 |  | p | FolChang1553 |  | p | FolChang1557 |  | p | FolChang1565 |  | p | FolChang1566 |  | p | FolChang1567 |  | p | FolChang1568 |  | p | FolChang1569 |  | p | FolChang1570 |  | p | FolChang1571 |  | p | FolChang1572 |  | p | FolChang1573 |  | p | FolChang1574 |  | p | FolChang1575 |  | p | FolChang1576 |  | p | FolChang1577 |  | p | FolChang1578 |  | p | FolChang1579 |  | p | FolChang1580 |  | p | FolChang1581 |  | p | FolChang1582 |  | p | FolChang1583 |  | p | FolChang1584 |  | p | FolChang1585 |  | p | FolChang1586 |  | p | FolChang1587 |  | p | FolChang1588 |  | p | FolChang1589 |  | p | FolChang1590 |  | p | FolChang1591 |  | p | FolChang1592 |  | p | FolChang1593 |  | p | FolChang1594 |  | p | FolChang1595 |  | p | FolChang1596 |  | p | FolChang1597 |  | p | FolChang1598 |  | p | FolChang1599 |  | p | FolChang1600 |  | p | FolChang1601 |  | p | FolChang1602 |  | p | FolChang1603 |  | p | FolChang1604 |  | p | FolChang1605 |  | p | FolChang1606 |  | p | FolChang1607 |  | p | FolChang1608 |  | p | FolChang1609 |  | p | FolChang1610 |  | p | FolChang1611 |  | p | FolChang1612 |  | p | FolChang1613 |  | p | FolChang1614 |  | p | FolChang1615 |  | p | FolChang1616 |  | p | FolChang1617 |  | p | FolChang1618 |  | p | FolChang1619 |  | p | FolChang1620 |  | p | FolChang1621 |  | p | FolChang1622 |  | p | FolChang1623 |  | p | FolChang1624 |  | p | FolChang1625 |  | p | FolChang1626 |  | p | FolChang1627 |  | p | FolChang1628 |  | p | FolChang1629 |  | p | FolChang1630 |  | p | FolChang1631 |  | p | FolChang1632 |  | p | FolChang1633 |  | p | FolChang1634 |  | p | FolChang1635 |  | p | FolChang1636 |  | p | FolChang1637 |  | p | FolChang1638 |  | p | FolChang1639 |  | p | FolChang1640 |  | p | FolChang1641 |  | p | FolChang1642 |  | p | FolChang1643 |  | p | FolChang1644 |  | p | FolChang1645 |  | p | FolChang1646 |  | p | FolChang1647 |  | p | FolChang1648 |  | p | FolChang1649 |  | p | FolChang1650 |  | p | FolChang1651 |  | p | FolChang1652 |  | p | FolChang1653 |  | p | FolChang1654 |  | p | FolChang1655 |  | p | FolChang1656 |  | p | FolChang1657 |  | p | FolChang1658 |  | p | FolChang1659 |  | p | FolChang1660 |  | p | FolChang1661 |  | p | FolChang1662 |  | p | FolChang1663 |  | p | FolChang1664 |  | p | FolChang1665 |  | p | FolChang1666 |  | p | FolChang1667 |  | p | FolChang1668 |  | p | FolChang1669 |  | p | FolChang1670 |  | p | FolChang1671 |  | p | FolChang1672 |  | p | FolChang1673 |  | p | FolChang1674 |  | p | FolChang1675 |  | p | FolChang1676 |  | p | FolChang1677 |  | p | FolChang1678 |  | p | FolChang1679 |  | p | FolChang1680 |  | p | FolChang1681 |  | p | FolChang1682 |  | p | FolChang1683 |  | p | FolChang1684 |  | p | FolChang1685 |  | p | FolChang1686 |  | p | FolChang1687 |  | p | FolChang1688 |  | p | FolChang1689 |  | p | FolChang1690 |  | p | FolChang1691 |  | p | FolChang1692 |  | p | FolChang1693 |  | p | FolChang1694 |  | p | FolChang1695 |  | p | FolChang1696 |  | p | FolChang1697 |  | p | FolChang1698 |  | p | FolChang1699 |  | p | FolChang1700 |  | p | FolChang1701 |  | p | FolChang1702 |  | p | FolChang1703 |  | p | FolChang1704 |  | p | FolChang1705 |  | p | FolChang1706 |  | p | FolChang1707 |  | p | FolChang1708 |  | p | FolChang1709 |  | p | FolChang1710 |  | p | FolChang1711 |  | p | FolChang1712 |  | p | FolChang1713 |  | p | FolChang1714 |  | p | FolChang1715 |  | p | FolChang1716 |  | p | FolChang1717 |  | p | FolChang1718 |  | p | FolChang1719 |  | p | FolChang1720 |  | p | FolChang1721 |  | p | FolChang1722 |  | p | FolChang1723 |  | p | FolChang1724 |  | p | FolChang1725 |  | p | FolChang1726 |  | p | FolChang1727 |  | p | FolChang1728 |  | p | FolChang1729 |  | p | FolChang1730 |  | p | FolChang1731 |  | p | FolChang1732 |  | p | FolChang1733 |  | p | FolChang1734 |  | p | FolChang1735 |  | p | FolChang1736 |  | p | FolChang1737 |  | p | FolChang1738 |  | p | FolChang1739 |  | p | FolChang1740 |  | p | FolChang1741 |  | p | FolChang1742 |  | p | FolChang1743 |  | p | FolChang1744 |  | p | FolChang1745 |  | p | FolChang1746 |  | p | FolChang1747 |  | p | FolChang1748 |  | p | FolChang1749 |  | p | FolChang1750 |  | p | FolChang1751 |  | p | FolChang1752 |  | p | FolChang1753 |  | p | FolChang1754 |  | p | FolChang1755 |  | p | FolChang1756 |  | p | FolChang1757 |  | p | FolChang1758 |  | p | FolChang1759 |  | p | FolChang1760 |  | p | FolChang1761 |  | p | FolChang1762 |  | p | FolChang1763 |  | p | FolChang1764 |  | p | FolChang1765 |  | p | FolChang1766 |  | p | FolChang1767 |  | p | FolChang1768 |  | p | FolChang1769 |  | p | FolChang1770 |  | p | FolChang1771 |  | p | FolChang1772 |  | p | FolChang1773 |  | p | FolChang1774 |  | p | FolChang1775 |  | p | FolChang1776 |  | p | FolChang1777 |  | p | FolChang1778 |  | p | FolChang1779 |  | p | FolChang1780 |  | p | FolChang1781 |  | p | FolChang1782 |  | p | FolChang1783 |  | p | FolChang1784 |  | p | FolChang1785 |  | p | FolChang1786 |  | p | FolChang1787 |  | p | FolChang1788 |  | p | FolChang1789 |  | p | FolChang1790 |  | p | FolChang1791 |  | p | FolChang1792 |  | p | FolChang1793 |  | p | FolChang1794 |  | p | FolChang1795 |  | p | FolChang1796 |  | p | FolChang1797 |  | p | FolChang1798 |  | p | FolChang1799 |  | p | FolChang1800 |  | p | FolChang1801 |  | p | FolChang1802 |  | p | FolChang1803 |  | p | FolChang1804 |  | p | FolChang1805 |  | p | FolChang1806 |  | p | FolChang1807 |  | p | FolChang1808 |  | p | FolChang1809 |
|---------|---|-------------|--|---|-------------|--|---|-------------|--|---|-------------|--|---|-------------|--|---|-------------|--|---|-------------|--|---|--------------|--|---|--------------|--|---|--------------|--|---|--------------|--|---|--------------|--|---|--------------|--|---|--------------|--|---|--------------|--|---|--------------|--|---|--------------|--|---|--------------|--|---|--------------|--|---|--------------|--|---|--------------|--|---|--------------|--|---|--------------|--|---|--------------|--|---|--------------|--|---|--------------|--|---|--------------|--|---|--------------|--|---|--------------|--|---|--------------|--|---|--------------|--|---|--------------|--|---|--------------|--|---|--------------|--|---|--------------|--|---|--------------|--|---|--------------|--|---|--------------|--|---|--------------|--|---|--------------|--|---|--------------|--|---|--------------|--|---|--------------|--|---|--------------|--|---|--------------|--|---|--------------|--|---|--------------|--|---|--------------|--|---|--------------|--|---|--------------|--|---|--------------|--|---|--------------|--|---|--------------|--|---|--------------|--|---|--------------|--|---|--------------|--|---|--------------|--|---|--------------|--|---|--------------|--|---|--------------|--|---|--------------|--|---|--------------|--|---|--------------|--|---|--------------|--|---|--------------|--|---|--------------|--|---|--------------|--|---|--------------|--|---|--------------|--|---|--------------|--|---|--------------|--|---|--------------|--|---|--------------|--|---|--------------|--|---|--------------|--|---|--------------|--|---|--------------|--|---|--------------|--|---|--------------|--|---|--------------|--|---|--------------|--|---|--------------|--|---|--------------|--|---|--------------|--|---|--------------|--|---|--------------|--|---|--------------|--|---|--------------|--|---|--------------|--|---|--------------|--|---|--------------|--|---|--------------|--|---|--------------|--|---|--------------|--|---|--------------|--|---|--------------|--|---|--------------|--|---|--------------|--|---|--------------|--|---|--------------|--|---|--------------|--|---|--------------|--|---|--------------|--|---|--------------|--|---|--------------|--|---|--------------|--|---|--------------|--|---|--------------|--|---|--------------|--|---|--------------|--|---|--------------|--|---|--------------|--|---|--------------|--|---|--------------|--|---|--------------|--|---|--------------|--|---|--------------|--|---|--------------|--|---|--------------|--|---|--------------|--|---|--------------|--|---|--------------|--|---|--------------|--|---|--------------|--|---|--------------|--|---|--------------|--|---|--------------|--|---|--------------|--|---|--------------|--|---|--------------|--|---|--------------|--|---|--------------|--|---|--------------|--|---|--------------|--|---|--------------|--|---|--------------|--|---|--------------|--|---|--------------|--|---|--------------|--|---|--------------|--|---|--------------|--|---|--------------|--|---|--------------|--|---|--------------|--|---|--------------|--|---|--------------|--|---|--------------|--|---|--------------|--|---|--------------|--|---|--------------|--|---|--------------|--|---|--------------|--|---|--------------|--|---|--------------|--|---|--------------|--|---|--------------|--|---|--------------|--|---|--------------|--|---|--------------|--|---|--------------|--|---|--------------|--|---|--------------|--|---|--------------|--|---|--------------|--|---|--------------|--|---|--------------|--|---|--------------|--|---|--------------|--|---|--------------|--|---|--------------|--|---|--------------|--|---|--------------|--|---|--------------|--|---|--------------|--|---|--------------|--|---|--------------|--|---|--------------|--|---|--------------|--|---|--------------|--|---|--------------|--|---|--------------|--|---|--------------|--|---|--------------|--|---|--------------|--|---|--------------|--|---|--------------|--|---|--------------|--|---|--------------|--|---|--------------|--|---|--------------|--|---|--------------|--|---|--------------|--|---|--------------|--|---|--------------|--|---|--------------|--|---|--------------|--|---|--------------|--|---|--------------|--|---|--------------|--|---|--------------|--|---|--------------|--|---|--------------|--|---|--------------|--|---|--------------|--|---|--------------|--|---|--------------|--|---|--------------|--|---|--------------|--|---|--------------|--|---|--------------|--|---|--------------|--|---|--------------|--|---|--------------|--|---|--------------|--|---|--------------|--|---|--------------|--|---|--------------|--|---|--------------|--|---|--------------|--|---|--------------|--|---|--------------|--|---|--------------|--|---|--------------|--|---|--------------|--|---|--------------|--|---|--------------|--|---|--------------|--|---|--------------|--|---|--------------|--|---|--------------|--|---|--------------|--|---|--------------|--|---|--------------|--|---|--------------|--|---|--------------|--|---|--------------|--|---|--------------|--|---|--------------|--|---|--------------|--|---|--------------|--|---|--------------|--|---|--------------|--|---|--------------|--|---|--------------|--|---|--------------|--|---|--------------|--|---|--------------|--|---|--------------|--|---|--------------|--|---|--------------|--|---|--------------|--|---|--------------|--|---|--------------|--|---|--------------|--|---|--------------|
|---------|---|-------------|--|---|-------------|--|---|-------------|--|---|-------------|--|---|-------------|--|---|-------------|--|---|-------------|--|---|--------------|--|---|--------------|--|---|--------------|--|---|--------------|--|---|--------------|--|---|--------------|--|---|--------------|--|---|--------------|--|---|--------------|--|---|--------------|--|---|--------------|--|---|--------------|--|---|--------------|--|---|--------------|--|---|--------------|--|---|--------------|--|---|--------------|--|---|--------------|--|---|--------------|--|---|--------------|--|---|--------------|--|---|--------------|--|---|--------------|--|---|--------------|--|---|--------------|--|---|--------------|--|---|--------------|--|---|--------------|--|---|--------------|--|---|--------------|--|---|--------------|--|---|--------------|--|---|--------------|--|---|--------------|--|---|--------------|--|---|--------------|--|---|--------------|--|---|--------------|--|---|--------------|--|---|--------------|--|---|--------------|--|---|--------------|--|---|--------------|--|---|--------------|--|---|--------------|--|---|--------------|--|---|--------------|--|---|--------------|--|---|--------------|--|---|--------------|--|---|--------------|--|---|--------------|--|---|--------------|--|---|--------------|--|---|--------------|--|---|--------------|--|---|--------------|--|---|--------------|--|---|--------------|--|---|--------------|--|---|--------------|--|---|--------------|--|---|--------------|--|---|--------------|--|---|--------------|--|---|--------------|--|---|--------------|--|---|--------------|--|---|--------------|--|---|--------------|--|---|--------------|--|---|--------------|--|---|--------------|--|---|--------------|--|---|--------------|--|---|--------------|--|---|--------------|--|---|--------------|--|---|--------------|--|---|--------------|--|---|--------------|--|---|--------------|--|---|--------------|--|---|--------------|--|---|--------------|--|---|--------------|--|---|--------------|--|---|--------------|--|---|--------------|--|---|--------------|--|---|--------------|--|---|--------------|--|---|--------------|--|---|--------------|--|---|--------------|--|---|--------------|--|---|--------------|--|---|--------------|--|---|--------------|--|---|--------------|--|---|--------------|--|---|--------------|--|---|--------------|--|---|--------------|--|---|--------------|--|---|--------------|--|---|--------------|--|---|--------------|--|---|--------------|--|---|--------------|--|---|--------------|--|---|--------------|--|---|--------------|--|---|--------------|--|---|--------------|--|---|--------------|--|---|--------------|--|---|--------------|--|---|--------------|--|---|--------------|--|---|--------------|--|---|--------------|--|---|--------------|--|---|--------------|--|---|--------------|--|---|--------------|--|---|--------------|--|---|--------------|--|---|--------------|--|---|--------------|--|---|--------------|--|---|--------------|--|---|--------------|--|---|--------------|--|---|--------------|--|---|--------------|--|---|--------------|--|---|--------------|--|---|--------------|--|---|--------------|--|---|--------------|--|---|--------------|--|---|--------------|--|---|--------------|--|---|--------------|--|---|--------------|--|---|--------------|--|---|--------------|--|---|--------------|--|---|--------------|--|---|--------------|--|---|--------------|--|---|--------------|--|---|--------------|--|---|--------------|--|---|--------------|--|---|--------------|--|---|--------------|--|---|--------------|--|---|--------------|--|---|--------------|--|---|--------------|--|---|--------------|--|---|--------------|--|---|--------------|--|---|--------------|--|---|--------------|--|---|--------------|--|---|--------------|--|---|--------------|--|---|--------------|--|---|--------------|--|---|--------------|--|---|--------------|--|---|--------------|--|---|--------------|--|---|--------------|--|---|--------------|--|---|--------------|--|---|--------------|--|---|--------------|--|---|--------------|--|---|--------------|--|---|--------------|--|---|--------------|--|---|--------------|--|---|--------------|--|---|--------------|--|---|--------------|--|---|--------------|--|---|--------------|--|---|--------------|--|---|--------------|--|---|--------------|--|---|--------------|--|---|--------------|--|---|--------------|--|---|--------------|--|---|--------------|--|---|--------------|--|---|--------------|--|---|--------------|--|---|--------------|--|---|--------------|--|---|--------------|--|---|--------------|--|---|--------------|--|---|--------------|--|---|--------------|--|---|--------------|--|---|--------------|--|---|--------------|--|---|--------------|--|---|--------------|--|---|--------------|--|---|--------------|--|---|--------------|--|---|--------------|--|---|--------------|--|---|--------------|--|---|--------------|--|---|--------------|--|---|--------------|--|---|--------------|--|---|--------------|--|---|--------------|--|---|--------------|--|---|--------------|--|---|--------------|--|---|--------------|--|---|--------------|--|---|--------------|--|---|--------------|--|---|--------------|--|---|--------------|--|---|--------------|--|---|--------------|--|---|--------------|--|---|--------------|--|---|--------------|--|---|--------------|--|---|--------------|--|---|--------------|--|---|--------------|--|---|--------------|--|---|--------------|--|---|--------------|--|---|--------------|

File: ESM\_10 (Online Resource)

Title: Comparative Multidimensional Molecular Analyses of Pediatric Diffuse Intrinsic Tumors: Glioma Reveals Distinct Molecular Subtypes

Journal: Acta Neurochirurgica

Authors: Amanda M. Stransik, Madhuri Kumbhakar, Kendall Snyder, Sidney Yustine, Joe Devenney, Brennan Harmon, Jordan Hall, Eric H. Rubie, Ping An, Melanie Weingart, Brian Ross, Sarah Marge, Roger J. Packer, Julia Nazarian

Corresponding Author:

Julia Nazarian, Children's National Medical Center, Center for Genetic Medicine

111 Michigan Ave., NW, Washington DC, 20010

Phone: 202-476-6022 Fax: 202-476-6014

Email: J.Nazarian@CNMC.org

| Gene ID | P-<br>value[106] | MeanRatio<br>(106 vs. n) | FoldChange[106] | p-<br>value[110] | MeanRatio<br>(110 vs. n) | FoldChange[110] | p-<br>value[111] | MeanRatio<br>(111 vs. n) | FoldChange[111] | p-<br>value[112] | MeanRatio<br>(112 vs. n) | FoldChange[112] | p-<br>value[121] | MeanRatio<br>(121 vs. n) | FoldChange[121] | p-<br>value[137] | MeanRatio<br>(137 vs. n) | FoldChange[137] | p-<br>value[153] | MeanRatio<br>(153 vs. n) | FoldChange[153] | p-<br>value[157] | MeanRatio<br>(157 vs. n) | FoldChange[157] | p-<br>value[165] | MeanRatio<br>(165 vs. n) | FoldChange[165] | p-<br>value[178] | MeanRatio<br>(178 vs. n) | FoldChange[178] | p-<br>value[185] | MeanRatio<br>(185 vs. n) | FoldChange[185] | p-<br>value[186] | MeanRatio<br>(186 vs. n) | FoldChange[186] | p-<br>value[187] | MeanRatio<br>(187 vs. n) | FoldChange[187] | p-<br>value[188] | MeanRatio<br>(188 vs. n) | FoldChange[188] | p-<br>value[189] | MeanRatio<br>(189 vs. n) | FoldChange[189] | p-<br>value[190] | MeanRatio<br>(190 vs. n) | FoldChange[190] | p-<br>value[191] | MeanRatio<br>(191 vs. n) | FoldChange[191] | p-<br>value[192] | MeanRatio<br>(192 vs. n) | FoldChange[192] | p-<br>value[193] | MeanRatio<br>(193 vs. n) | FoldChange[193] | p-<br>value[194] | MeanRatio<br>(194 vs. n) | FoldChange[194] | p-<br>value[195] | MeanRatio<br>(195 vs. n) | FoldChange[195] | p-<br>value[196] | MeanRatio<br>(196 vs. n) | FoldChange[196] | p-<br>value[197] | MeanRatio<br>(197 vs. n) | FoldChange[197] | p-<br>value[198] | MeanRatio<br>(198 vs. n) | FoldChange[198] | p-<br>value[199] | MeanRatio<br>(199 vs. n) | FoldChange[199] | p-<br>value[200] | MeanRatio<br>(200 vs. n) | FoldChange[200] | p-<br>value[201] | MeanRatio<br>(201 vs. n) | FoldChange[201] | p-<br>value[202] | MeanRatio<br>(202 vs. n) | FoldChange[202] | p-<br>value[203] | MeanRatio<br>(203 vs. n) | FoldChange[203] | p-<br>value[204] | MeanRatio<br>(204 vs. n) | FoldChange[204] | p-<br>value[205] | MeanRatio<br>(205 vs. n) | FoldChange[205] | p-<br>value[206] | MeanRatio<br>(206 vs. n) | FoldChange[206] | p-<br>value[207] | MeanRatio<br>(207 vs. n) | FoldChange[207] | p-<br>value[208] | MeanRatio<br>(208 vs. n) | FoldChange[208] | p-<br>value[209] | MeanRatio<br>(209 vs. n) | FoldChange[209] | p-<br>value[210] | MeanRatio<br>(210 vs. n) | FoldChange[210] | p-<br>value[211] | MeanRatio<br>(211 vs. n) | FoldChange[211] | p-<br>value[212] | MeanRatio<br>(212 vs. n) | FoldChange[212] | p-<br>value[213] | MeanRatio<br>(213 vs. n) | FoldChange[213] | p-<br>value[214] | MeanRatio<br>(214 vs. n) | FoldChange[214] | p-<br>value[215] | MeanRatio<br>(215 vs. n) | FoldChange[215] | p-<br>value[216] | MeanRatio<br>(216 vs. n) | FoldChange[216] | p-<br>value[217] | MeanRatio<br>(217 vs. n) | FoldChange[217] | p-<br>value[218] | MeanRatio<br>(218 vs. n) | FoldChange[218] | p-<br>value[219] | MeanRatio<br>(219 vs. n) | FoldChange[219] | p-<br>value[220] | MeanRatio<br>(220 vs. n) | FoldChange[220] | p-<br>value[221] | MeanRatio<br>(221 vs. n) | FoldChange[221] | p-<br>value[222] | MeanRatio<br>(222 vs. n) | FoldChange[222] | p-<br>value[223] | MeanRatio<br>(223 vs. n) | FoldChange[223] | p-<br>value[224] | MeanRatio<br>(224 vs. n) | FoldChange[224] | p-<br>value[225] | MeanRatio<br>(225 vs. n) | FoldChange[225] | p-<br>value[226] | MeanRatio<br>(226 vs. n) | FoldChange[226] | p-<br>value[227] | MeanRatio<br>(227 vs. n) | FoldChange[227] | p-<br>value[228] | MeanRatio<br>(228 vs. n) | FoldChange[228] | p-<br>value[229] | MeanRatio<br>(229 vs. n) | FoldChange[229] | p-<br>value[230] | MeanRatio<br>(230 vs. n) | FoldChange[230] | p-<br>value[231] | MeanRatio<br>(231 vs. n) | FoldChange[231] | p-<br>value[232] | MeanRatio<br>(232 vs. n) | FoldChange[232] | p-<br>value[233] | MeanRatio<br>(233 vs. n) | FoldChange[233] | p-<br>value[234] | MeanRatio<br>(234 vs. n) | FoldChange[234] | p-<br>value[235] | MeanRatio<br>(235 vs. n) | FoldChange[235] | p-<br>value[236] | MeanRatio<br>(236 vs. n) | FoldChange[236] | p-<br>value[237] | MeanRatio<br>(237 vs. n) | FoldChange[237] | p-<br>value[238] | MeanRatio<br>(238 vs. n) | FoldChange[238] | p-<br>value[239] | MeanRatio<br>(239 vs. n) | FoldChange[239] | p-<br>value[240] | MeanRatio<br>(240 vs. n) | FoldChange[240] | p-<br>value[241] | MeanRatio<br>(241 vs. n) | FoldChange[241] | p-<br>value[242] | MeanRatio<br>(242 vs. n) | FoldChange[242] | p-<br>value[243] | MeanRatio<br>(243 vs. n) | FoldChange[243] | p-<br>value[244] | MeanRatio<br>(244 vs. n) | FoldChange[244] | p-<br>value[245] | MeanRatio<br>(245 vs. n) | FoldChange[245] | p-<br>value[246] | MeanRatio<br>(246 vs. n) | FoldChange[246] | p-<br>value[247] | MeanRatio<br>(247 vs. n) | FoldChange[247] | p-<br>value[248] | MeanRatio<br>(248 vs. n) | FoldChange[248] | p-<br>value[249] | MeanRatio<br>(249 vs. n) | FoldChange[249] | p-<br>value[250] | MeanRatio<br>(250 vs. n) | FoldChange[250] | p-<br>value[251] | MeanRatio<br>(251 vs. n) | FoldChange[251] | p-<br>value[252] | MeanRatio<br>(252 vs. n) | FoldChange[252] | p-<br>value[253] | MeanRatio<br>(253 vs. n) | FoldChange[253] | p-<br>value[254] | MeanRatio<br>(254 vs. n) | FoldChange[254] | p-<br>value[255] | MeanRatio<br>(255 vs. n) | FoldChange[255] | p-<br>value[256] | MeanRatio<br>(256 vs. n) | FoldChange[256] | p-<br>value[257] | MeanRatio<br>(257 vs. n) | FoldChange[257] | p-<br>value[258] | MeanRatio<br>(258 vs. n) | FoldChange[258] | p-<br>value[259] | MeanRatio<br>(259 vs. n) | FoldChange[259] | p-<br>value[260] | MeanRatio<br>(260 vs. n) | FoldChange[260] | p-<br>value[261] | MeanRatio<br>(261 vs. n) | FoldChange[261] | p-<br>value[262] | MeanRatio<br>(262 vs. n) | FoldChange[262] | p-<br>value[263] | MeanRatio<br>(263 vs. n) | FoldChange[263] | p-<br>value[264] | MeanRatio<br>(264 vs. n) | FoldChange[264] | p-<br>value[265] | MeanRatio<br>(265 vs. n) | FoldChange[265] | p-<br>value[266] | MeanRatio<br>(266 vs. n) | FoldChange[266] | p-<br>value[267] | MeanRatio<br>(267 vs. n) | FoldChange[267] | p-<br>value[268] | MeanRatio<br>(268 vs. n) | FoldChange[268] | p-<br>value[269] | MeanRatio<br>(269 vs. n) | FoldChange[269] | p-<br>value[270] | MeanRatio<br>(270 vs. n) | FoldChange[270] | p-<br>value[271] | MeanRatio<br>(271 vs. n) | FoldChange[271] | p-<br>value[272] | MeanRatio<br>(272 vs. n) | FoldChange[272] | p-<br>value[273] | MeanRatio<br>(273 vs. n) | FoldChange[273] | p-<br>value[274] | MeanRatio<br>(274 vs. n) | FoldChange[274] | p-<br>value[275] | MeanRatio<br>(275 vs. n) | FoldChange[275] | p-<br>value[276] | MeanRatio<br>(276 vs. n) | FoldChange[276] | p-<br>value[277] | MeanRatio<br>(277 vs. n) | FoldChange[277] | p-<br>value[278] | MeanRatio<br>(278 vs. n) | FoldChange[278] | p-<br>value[279] | MeanRatio<br>(279 vs. n) | FoldChange[279] | p-<br>value[280] | MeanRatio<br>(280 vs. n) | FoldChange[280] | p-<br>value[281] | MeanRatio<br>(281 vs. n) | FoldChange[281] | p-<br>value[282] | MeanRatio<br>(282 vs. n) | FoldChange[282] | p-<br>value[283] | MeanRatio<br>(283 vs. n) | FoldChange[283] | p-<br>value[284] | MeanRatio<br>(284 vs. n) | FoldChange[284] | p-<br>value[285] | MeanRatio<br>(285 vs. n) | FoldChange[285] | p-<br>value[286] | MeanRatio<br>(286 vs. n) | FoldChange[286] | p-<br>value[287] | MeanRatio<br>(287 vs. n) | FoldChange[287] | p-<br>value[288] | MeanRatio<br>(288 vs. n) | FoldChange[288] | p-<br>value[289] | MeanRatio<br>(289 vs. n) | FoldChange[289] | p-<br>value[290] | MeanRatio<br>(290 vs. n) | FoldChange[290] | p-<br>value[291] | MeanRatio<br>(291 vs. n) | FoldChange[291] | p-<br>value[292] | MeanRatio<br>(292 vs. n) | FoldChange[292] | p-<br>value[293] | MeanRatio<br>(293 vs. n) | FoldChange[293] | p-<br>value[294] | MeanRatio<br>(294 vs. n) | FoldChange[294] | p-<br>value[295] | MeanRatio<br>(295 vs. n) | FoldChange[295] | p-<br>value[296] | MeanRatio<br>(296 vs. n) | FoldChange[296] | p-<br>value[297] | MeanRatio<br>(297 vs. n) | FoldChange[297] | p-<br>value[298] | MeanRatio<br>(298 vs. n) | FoldChange[298] | p-<br>value[299] | MeanRatio<br>(299 vs. n) | FoldChange[299] | p-<br>value[300] | MeanRatio<br>(300 vs. n) | FoldChange[300] | p-<br>value[301] | MeanRatio<br>(301 vs. n) | FoldChange[301] | p-<br>value[302] | MeanRatio<br>(302 vs. n) | FoldChange[302] | p-<br>value[303] | MeanRatio<br>(303 vs. n) | FoldChange[303] | p-<br>value[304] | MeanRatio<br>(304 vs. n) | FoldChange[304] | p-<br>value[305] | MeanRatio<br>(305 vs. n) | FoldChange[305] | p-<br>value[306] | MeanRatio<br>(306 vs. n) | FoldChange[306] | p-<br>value[307] | MeanRatio<br>(307 vs. n) | FoldChange[307] | p-<br>value[308] | MeanRatio<br>(308 vs. n) | FoldChange[308] | p-<br>value[309] | MeanRatio<br>(309 vs. n) | FoldChange[309] | p-<br>value[310] | MeanRatio<br>(310 vs. n) | FoldChange[310] | p-<br>value[311] | MeanRatio<br>(311 vs. n) | FoldChange[311] | p-<br>value[312] | MeanRatio<br>(312 vs. n) | FoldChange[312] | p-<br>value[313] | MeanRatio<br>(313 vs. n) | FoldChange[313] | p-<br>value[314] | MeanRatio<br>(314 vs. n) | FoldChange[314] | p-<br>value[315] | MeanRatio<br>(315 vs. n) | FoldChange[315] | p-<br>value[316] | MeanRatio<br>(316 vs. n) | FoldChange[316] | p-<br>value[317] | MeanRatio<br>(317 vs. n) | FoldChange[317] | p-<br>value[318] | MeanRatio<br>(318 vs. n) | FoldChange[318] | p-<br>value[319] | MeanRatio<br>(319 vs. n) | FoldChange[319] | p-<br>value[320] | MeanRatio<br>(320 vs. n) | FoldChange[320] | p-<br>value[321] | MeanRatio<br>(321 vs. n) | FoldChange[321] | p-<br>value[322] | MeanRatio<br>(322 vs. n) | FoldChange[322] | p-<br>value[323] | MeanRatio<br>(323 vs. n) | FoldChange[323] | p-<br>value[324] | MeanRatio<br>(324 vs. n) | FoldChange[324] | p-<br>value[325] | MeanRatio<br>(325 vs. n) | FoldChange[325] | p-<br>value[326] | MeanRatio<br>(326 vs. n) | FoldChange[326] | p-<br>value[327] | MeanRatio<br>(327 vs. n) | FoldChange[327] | p-<br>value[328] | MeanRatio<br>(328 vs. n) | FoldChange[328] | p-<br>value[329] | MeanRatio<br>(329 vs. n) | FoldChange[329] | p-<br>value[330] | MeanRatio<br>(330 vs. n) | FoldChange[330] | p-<br>value[331] | MeanRatio<br>(331 vs. n) | FoldChange[331] | p-<br>value[332] | MeanRatio<br>(332 vs. n) | FoldChange[332] | p-<br>value[333] | MeanRatio<br>(333 vs. n) | FoldChange[333] | p-<br>value[334] | MeanRatio<br>(334 vs. n) | FoldChange[334] | p-<br>value[335] | MeanRatio<br>(335 vs. n) | FoldChange[335] | p-<br>value[336] | MeanRatio<br>(336 vs. n) | FoldChange[336] | p-<br>value[337] | MeanRatio<br>(337 vs. n) | FoldChange[337] | p-<br>value[338] | MeanRatio<br>(338 vs. n) | FoldChange[338] | p-<br>value[339] | MeanRatio<br>(339 vs. n) |
|---------|------------------|--------------------------|-----------------|------------------|--------------------------|-----------------|------------------|--------------------------|-----------------|------------------|--------------------------|-----------------|------------------|--------------------------|-----------------|------------------|--------------------------|-----------------|------------------|--------------------------|-----------------|------------------|--------------------------|-----------------|------------------|--------------------------|-----------------|------------------|--------------------------|-----------------|------------------|--------------------------|-----------------|------------------|--------------------------|-----------------|------------------|--------------------------|-----------------|------------------|--------------------------|-----------------|------------------|--------------------------|-----------------|------------------|--------------------------|-----------------|------------------|--------------------------|-----------------|------------------|--------------------------|-----------------|------------------|--------------------------|-----------------|------------------|--------------------------|-----------------|------------------|--------------------------|-----------------|------------------|--------------------------|-----------------|------------------|--------------------------|-----------------|------------------|--------------------------|-----------------|------------------|--------------------------|-----------------|------------------|--------------------------|-----------------|------------------|--------------------------|-----------------|------------------|--------------------------|-----------------|------------------|--------------------------|-----------------|------------------|--------------------------|-----------------|------------------|--------------------------|-----------------|------------------|--------------------------|-----------------|------------------|--------------------------|-----------------|------------------|--------------------------|-----------------|------------------|--------------------------|-----------------|------------------|--------------------------|-----------------|------------------|--------------------------|-----------------|------------------|--------------------------|-----------------|------------------|--------------------------|-----------------|------------------|--------------------------|-----------------|------------------|--------------------------|-----------------|------------------|--------------------------|-----------------|------------------|--------------------------|-----------------|------------------|--------------------------|-----------------|------------------|--------------------------|-----------------|------------------|--------------------------|-----------------|------------------|--------------------------|-----------------|------------------|--------------------------|-----------------|------------------|--------------------------|-----------------|------------------|--------------------------|-----------------|------------------|--------------------------|-----------------|------------------|--------------------------|-----------------|------------------|--------------------------|-----------------|------------------|--------------------------|-----------------|------------------|--------------------------|-----------------|------------------|--------------------------|-----------------|------------------|--------------------------|-----------------|------------------|--------------------------|-----------------|------------------|--------------------------|-----------------|------------------|--------------------------|-----------------|------------------|--------------------------|-----------------|------------------|--------------------------|-----------------|------------------|--------------------------|-----------------|------------------|--------------------------|-----------------|------------------|--------------------------|-----------------|------------------|--------------------------|-----------------|------------------|--------------------------|-----------------|------------------|--------------------------|-----------------|------------------|--------------------------|-----------------|------------------|--------------------------|-----------------|------------------|--------------------------|-----------------|------------------|--------------------------|-----------------|------------------|--------------------------|-----------------|------------------|--------------------------|-----------------|------------------|--------------------------|-----------------|------------------|--------------------------|-----------------|------------------|--------------------------|-----------------|------------------|--------------------------|-----------------|------------------|--------------------------|-----------------|------------------|--------------------------|-----------------|------------------|--------------------------|-----------------|------------------|--------------------------|-----------------|------------------|--------------------------|-----------------|------------------|--------------------------|-----------------|------------------|--------------------------|-----------------|------------------|--------------------------|-----------------|------------------|--------------------------|-----------------|------------------|--------------------------|-----------------|------------------|--------------------------|-----------------|------------------|--------------------------|-----------------|------------------|--------------------------|-----------------|------------------|--------------------------|-----------------|------------------|--------------------------|-----------------|------------------|--------------------------|-----------------|------------------|--------------------------|-----------------|------------------|--------------------------|-----------------|------------------|--------------------------|-----------------|------------------|--------------------------|-----------------|------------------|--------------------------|-----------------|------------------|--------------------------|-----------------|------------------|--------------------------|-----------------|------------------|--------------------------|-----------------|------------------|--------------------------|-----------------|------------------|--------------------------|-----------------|------------------|--------------------------|-----------------|------------------|--------------------------|-----------------|------------------|--------------------------|-----------------|------------------|--------------------------|-----------------|------------------|--------------------------|-----------------|------------------|--------------------------|-----------------|------------------|--------------------------|-----------------|------------------|--------------------------|-----------------|------------------|--------------------------|-----------------|------------------|--------------------------|-----------------|------------------|--------------------------|-----------------|------------------|--------------------------|-----------------|------------------|--------------------------|-----------------|------------------|--------------------------|-----------------|------------------|--------------------------|-----------------|------------------|--------------------------|-----------------|------------------|--------------------------|-----------------|------------------|--------------------------|-----------------|------------------|--------------------------|-----------------|------------------|--------------------------|-----------------|------------------|--------------------------|-----------------|------------------|--------------------------|-----------------|------------------|--------------------------|-----------------|------------------|--------------------------|-----------------|------------------|--------------------------|-----------------|------------------|--------------------------|-----------------|------------------|--------------------------|-----------------|------------------|--------------------------|-----------------|------------------|--------------------------|-----------------|------------------|--------------------------|-----------------|------------------|--------------------------|-----------------|------------------|--------------------------|-----------------|------------------|--------------------------|-----------------|------------------|--------------------------|-----------------|------------------|--------------------------|-----------------|------------------|--------------------------|-----------------|------------------|--------------------------|-----------------|------------------|--------------------------|-----------------|------------------|--------------------------|-----------------|------------------|--------------------------|-----------------|------------------|--------------------------|-----------------|------------------|--------------------------|-----------------|------------------|--------------------------|-----------------|------------------|--------------------------|-----------------|------------------|--------------------------|-----------------|------------------|--------------------------|-----------------|------------------|--------------------------|-----------------|------------------|--------------------------|-----------------|------------------|--------------------------|-----------------|------------------|--------------------------|-----------------|------------------|--------------------------|-----------------|------------------|--------------------------|-----------------|------------------|--------------------------|-----------------|------------------|--------------------------|-----------------|------------------|--------------------------|-----------------|------------------|--------------------------|-----------------|------------------|--------------------------|-----------------|------------------|--------------------------|-----------------|------------------|--------------------------|-----------------|------------------|--------------------------|-----------------|------------------|--------------------------|
|---------|------------------|--------------------------|-----------------|------------------|--------------------------|-----------------|------------------|--------------------------|-----------------|------------------|--------------------------|-----------------|------------------|--------------------------|-----------------|------------------|--------------------------|-----------------|------------------|--------------------------|-----------------|------------------|--------------------------|-----------------|------------------|--------------------------|-----------------|------------------|--------------------------|-----------------|------------------|--------------------------|-----------------|------------------|--------------------------|-----------------|------------------|--------------------------|-----------------|------------------|--------------------------|-----------------|------------------|--------------------------|-----------------|------------------|--------------------------|-----------------|------------------|--------------------------|-----------------|------------------|--------------------------|-----------------|------------------|--------------------------|-----------------|------------------|--------------------------|-----------------|------------------|--------------------------|-----------------|------------------|--------------------------|-----------------|------------------|--------------------------|-----------------|------------------|--------------------------|-----------------|------------------|--------------------------|-----------------|------------------|--------------------------|-----------------|------------------|--------------------------|-----------------|------------------|--------------------------|-----------------|------------------|--------------------------|-----------------|------------------|--------------------------|-----------------|------------------|--------------------------|-----------------|------------------|--------------------------|-----------------|------------------|--------------------------|-----------------|------------------|--------------------------|-----------------|------------------|--------------------------|-----------------|------------------|--------------------------|-----------------|------------------|--------------------------|-----------------|------------------|--------------------------|-----------------|------------------|--------------------------|-----------------|------------------|--------------------------|-----------------|------------------|--------------------------|-----------------|------------------|--------------------------|-----------------|------------------|--------------------------|-----------------|------------------|--------------------------|-----------------|------------------|--------------------------|-----------------|------------------|--------------------------|-----------------|------------------|--------------------------|-----------------|------------------|--------------------------|-----------------|------------------|--------------------------|-----------------|------------------|--------------------------|-----------------|------------------|--------------------------|-----------------|------------------|--------------------------|-----------------|------------------|--------------------------|-----------------|------------------|--------------------------|-----------------|------------------|--------------------------|-----------------|------------------|--------------------------|-----------------|------------------|--------------------------|-----------------|------------------|--------------------------|-----------------|------------------|--------------------------|-----------------|------------------|--------------------------|-----------------|------------------|--------------------------|-----------------|------------------|--------------------------|-----------------|------------------|--------------------------|-----------------|------------------|--------------------------|-----------------|------------------|--------------------------|-----------------|------------------|--------------------------|-----------------|------------------|--------------------------|-----------------|------------------|--------------------------|-----------------|------------------|--------------------------|-----------------|------------------|--------------------------|-----------------|------------------|--------------------------|-----------------|------------------|--------------------------|-----------------|------------------|--------------------------|-----------------|------------------|--------------------------|-----------------|------------------|--------------------------|-----------------|------------------|--------------------------|-----------------|------------------|--------------------------|-----------------|------------------|--------------------------|-----------------|------------------|--------------------------|-----------------|------------------|--------------------------|-----------------|------------------|--------------------------|-----------------|------------------|--------------------------|-----------------|------------------|--------------------------|-----------------|------------------|--------------------------|-----------------|------------------|--------------------------|-----------------|------------------|--------------------------|-----------------|------------------|--------------------------|-----------------|------------------|--------------------------|-----------------|------------------|--------------------------|-----------------|------------------|--------------------------|-----------------|------------------|--------------------------|-----------------|------------------|--------------------------|-----------------|------------------|--------------------------|-----------------|------------------|--------------------------|-----------------|------------------|--------------------------|-----------------|------------------|--------------------------|-----------------|------------------|--------------------------|-----------------|------------------|--------------------------|-----------------|------------------|--------------------------|-----------------|------------------|--------------------------|-----------------|------------------|--------------------------|-----------------|------------------|--------------------------|-----------------|------------------|--------------------------|-----------------|------------------|--------------------------|-----------------|------------------|--------------------------|-----------------|------------------|--------------------------|-----------------|------------------|--------------------------|-----------------|------------------|--------------------------|-----------------|------------------|--------------------------|-----------------|------------------|--------------------------|-----------------|------------------|--------------------------|-----------------|------------------|--------------------------|-----------------|------------------|--------------------------|-----------------|------------------|--------------------------|-----------------|------------------|--------------------------|-----------------|------------------|--------------------------|-----------------|------------------|--------------------------|-----------------|------------------|--------------------------|-----------------|------------------|--------------------------|-----------------|------------------|--------------------------|-----------------|------------------|--------------------------|-----------------|------------------|--------------------------|-----------------|------------------|--------------------------|-----------------|------------------|--------------------------|-----------------|------------------|--------------------------|-----------------|------------------|--------------------------|-----------------|------------------|--------------------------|-----------------|------------------|--------------------------|-----------------|------------------|--------------------------|-----------------|------------------|--------------------------|-----------------|------------------|--------------------------|-----------------|------------------|--------------------------|-----------------|------------------|--------------------------|-----------------|------------------|--------------------------|-----------------|------------------|--------------------------|-----------------|------------------|--------------------------|-----------------|------------------|--------------------------|-----------------|------------------|--------------------------|-----------------|------------------|--------------------------|-----------------|------------------|--------------------------|-----------------|------------------|--------------------------|-----------------|------------------|--------------------------|-----------------|------------------|--------------------------|-----------------|------------------|--------------------------|-----------------|------------------|--------------------------|-----------------|------------------|--------------------------|-----------------|------------------|--------------------------|-----------------|------------------|--------------------------|-----------------|------------------|--------------------------|-----------------|------------------|--------------------------|-----------------|------------------|--------------------------|-----------------|------------------|--------------------------|-----------------|------------------|--------------------------|-----------------|------------------|--------------------------|-----------------|------------------|--------------------------|-----------------|------------------|--------------------------|-----------------|------------------|--------------------------|-----------------|------------------|--------------------------|-----------------|------------------|--------------------------|-----------------|------------------|--------------------------|-----------------|------------------|--------------------------|-----------------|------------------|--------------------------|-----------------|------------------|--------------------------|-----------------|------------------|--------------------------|-----------------|------------------|--------------------------|

File: ESM\_10 (Online Resource 10)

Figure: Comparative Molecular Analyses of Peptide-Diffusion Profiles: Positive Gloms Reveals Distinct Molecular Subtypes

Journal: Acta Neurotherapeutica

Authors: Amanda M. Sontag, Madhuri Kumbhakar, Kendall Sykes, Sidicki Yavuz, Joe Deveney,

Brennan Harmon, Jordan Hall, Eric H. Raabe, Ping An, Melanie Weingart, Brian Reid, Sarah Magee, Roger J. Packer, Javad Nazarian

Corresponding Author:

Javad Nazarian, Children's National Medical Center, Center for Genetic Medicine,

111 Michigan Ave., NW, Washington DC, 20010

Phone: 202-476-0222; Fax: 202-476-6014

Email: J.Nazarian@CNMC.org

| Gene ID | P        | FolcChange106 |             |             | P             | FolcChange110 |             |             | P        | FolcChange111 |             |             | P        | FolcChange112 |               |             | P         | FolcChange121 |             |               | P | FolcChange137 |             |             | P             | FolcChange153 |             |             | P        | FolcChange156 |             |             |          |
|---------|----------|---------------|-------------|-------------|---------------|---------------|-------------|-------------|----------|---------------|-------------|-------------|----------|---------------|---------------|-------------|-----------|---------------|-------------|---------------|---|---------------|-------------|-------------|---------------|---------------|-------------|-------------|----------|---------------|-------------|-------------|----------|
|         |          | (106 vs. n)   | (106 vs. n) | (106 vs. n) |               | (110 vs. n)   | (110 vs. n) | (110 vs. n) |          | (111 vs. n)   | (111 vs. n) | (111 vs. n) |          | (112 vs. n)   | (112 vs. n)   | (112 vs. n) |           | (121 vs. n)   | (121 vs. n) | (121 vs. n)   |   | (137 vs. n)   | (137 vs. n) | (137 vs. n) |               | (153 vs. n)   | (153 vs. n) | (153 vs. n) |          | (156 vs. n)   | (156 vs. n) | (156 vs. n) |          |
| HCN1    | 0        | 1.56115       | 2.71988     | 2.71988     | 106 down vs n | 0             | 1.56552     | 1.56552     | 1.56552  | 106 down vs n | 0           | 1.56552     | 1.56552  | 1.56552       | 106 down vs n | 0           | 1.56552   | 1.56552       | 1.56552     | 106 down vs n | 0 | 1.56552       | 1.56552     | 1.56552     | 106 down vs n | 0             | 1.56552     | 1.56552     | 1.56552  | 106 down vs n | 0           | 1.56552     | 1.56552  |
| HCN1    | 0        | 2.3684        | 2.3684      | 2.3684      | 106 down vs n | 0             | 0.825837    | 1.11658     | 1.11658  | 106 down vs n | 0           | 0.825837    | 1.11658  | 1.11658       | 106 down vs n | 0           | 0.825837  | 1.11658       | 1.11658     | 106 down vs n | 0 | 0.825837      | 1.11658     | 1.11658     | 106 down vs n | 0             | 0.825837    | 1.11658     | 1.11658  | 106 down vs n | 0           | 0.825837    | 1.11658  |
| HCN1    | 0        | 0.29795       | -3.56227    | -3.56227    | 106 down vs n | 0             | 1.21282     | 1.21282     | 1.21282  | 106 down vs n | 0           | 1.21282     | 1.21282  | 1.21282       | 106 down vs n | 0           | 1.21282   | 1.21282       | 1.21282     | 106 down vs n | 0 | 1.21282       | 1.21282     | 1.21282     | 106 down vs n | 0             | 1.21282     | 1.21282     | 1.21282  | 106 down vs n | 0           | 1.21282     | 1.21282  |
| HCN1    | 0        | 0.165132      | -0.65578    | -0.65578    | 106 down vs n | 0             | 2.80299     | 2.80299     | 2.80299  | 106 down vs n | 0           | 2.80299     | 2.80299  | 2.80299       | 106 down vs n | 0           | 2.80299   | 2.80299       | 2.80299     | 106 down vs n | 0 | 2.80299       | 2.80299     | 2.80299     | 106 down vs n | 0             | 2.80299     | 2.80299     | 2.80299  | 106 down vs n | 0           | 2.80299     | 2.80299  |
| HCN1    | 0        | -0.481228     | -2.07802    | -2.07802    | 106 down vs n | 0             | 0.427356    | -5.33007    | -5.33007 | 106 down vs n | 0           | 0.427356    | -5.33007 | -5.33007      | 106 down vs n | 0           | 0.427356  | -5.33007      | -5.33007    | 106 down vs n | 0 | 0.427356      | -5.33007    | -5.33007    | 106 down vs n | 0             | 0.427356    | -5.33007    | -5.33007 | 106 down vs n | 0           | 0.427356    | -5.33007 |
| HCN1    | 1.922143 | -0.0731242    | -13.6754    | -13.6754    | 106 down vs n | 0             | 62.3084     | 62.3084     | 62.3084  | 106 down vs n | 0           | 62.3084     | 62.3084  | 62.3084       | 106 down vs n | 0           | 62.3084   | 62.3084       | 62.3084     | 106 down vs n | 0 | 62.3084       | 62.3084     | 62.3084     | 106 down vs n | 0             | 62.3084     | 62.3084     | 62.3084  | 106 down vs n | 0           | 62.3084     | 62.3084  |
| HCN2    | 0        | -0.449722     | -2.2236     | -2.2236     | 106 down vs n | 0             | -0.920256   | -1.0072     | -1.0072  | 106 down vs n | 0           | -0.920256   | -1.0072  | -1.0072       | 106 down vs n | 0           | -0.920256 | -1.0072       | -1.0072     | 106 down vs n | 0 | -0.920256     | -1.0072     | -1.0072     | 106 down vs n | 0             | -0.920256   | -1.0072     | -1.0072  | 106 down vs n | 0           | -0.920256   | -1.0072  |
| HCN2    | 0        | 0.317029      | -3.15429    | -3.15429    | 106 down vs n | 0             | 3.02194     | 3.02194     | 3.02194  | 106 down vs n | 0           | 3.02194     | 3.02194  | 3.02194       | 106 down vs n | 0           | 3.02194   | 3.02194       | 3.02194     | 106 down vs n | 0 | 3.02194       | 3.02194     | 3.02194     | 106 down vs n | 0             | 3.02194     | 3.02194     | 3.02194  | 106 down vs n | 0           | 3.02194     | 3.02194  |
| HCN2    | 0        | -0.177301     | -5.60402    | -5.60402    | 106 down vs n | 0             | 1.22934     | 1.22934     | 1.22934  | 106 down vs n | 0           | 1.22934     | 1.22934  | 1.22934       | 106 down vs n | 0           | 1.22934   | 1.22934       | 1.22934     | 106 down vs n | 0 | 1.22934       | 1.22934     | 1.22934     | 106 down vs n | 0             | 1.22934     | 1.22934     | 1.22934  | 106 down vs n | 0           | 1.22934     | 1.22934  |
| HCN2    | 1.406145 | 0.233389      | -4.85563    | -4.85563    | 106 down vs n | 0             | 1.71643     | 1.71643     | 1.71643  | 106 down vs n | 0           | 1.71643     | 1.71643  | 1.71643       | 106 down vs n | 0           | 1.71643   | 1.71643       | 1.71643     | 106 down vs n | 0 | 1.71643       | 1.71643     | 1.71643     | 106 down vs n | 0             | 1.71643     | 1.71643     | 1.71643  | 106 down vs n | 0           | 1.71643     | 1.71643  |
| HCN2    | 0        | 0.158369      | -0.506161   | -0.506161   | 106 down vs n | 0             | 1.73186     | 1.73186     | 1.73186  | 106 down vs n | 0           | 1.73186     | 1.73186  | 1.73186       | 106 down vs n | 0           | 1.73186   | 1.73186       | 1.73186     | 106 down vs n | 0 | 1.73186       | 1.73186     | 1.73186     | 106 down vs n | 0             | 1.73186     | 1.73186     | 1.73186  | 106 down vs n | 0           | 1.73186     | 1.73186  |
| HCN2    | 0        | -0.040401     | -15.4073    | -15.4073    | 106 down vs n | 0             | 0.756718    | -1.3215     | -1.3215  | 106 down vs n | 0           | 0.756718    | -1.3215  | -1.3215       | 106 down vs n | 0           | 0.756718  | -1.3215       | -1.3215     | 106 down vs n | 0 | 0.756718      | -1.3215     | -1.3215     | 106 down vs n | 0             | 0.756718    | -1.3215     | -1.3215  | 106 down vs n | 0           | 0.756718    | -1.3215  |
| HCN2    | 0        | 0.295778      | -3.80802    | -3.80802    | 106 down vs n | 0             | 2.28629     | 2.28629     | 2.28629  | 106 down vs n | 0           | 2.28629     | 2.28629  | 2.28629       | 106 down vs n | 0           | 2.28629   | 2.28629       | 2.28629     | 106 down vs n | 0 | 2.28629       | 2.28629     | 2.28629     | 106 down vs n | 0             | 2.28629     | 2.28629     | 2.28629  | 106 down vs n | 0           | 2.28629     | 2.28629  |
| HCN2    | 0        | 0.21131       | -0.040401   | -0.040401   | 106 down vs n | 0             | 1.24374     | 1.24374     | 1.24374  | 106 down vs n | 0           | 1.24374     | 1.24374  | 1.24374       | 106 down vs n | 0           | 1.24374   | 1.24374       | 1.24374     | 106 down vs n | 0 | 1.24374       | 1.24374     | 1.24374     | 106 down vs n | 0             | 1.24374     | 1.24374     | 1.24374  | 106 down vs n | 0           | 1.24374     | 1.24374  |
| HCN2    | 0        | 0.183132      | -0.46083    | -0.46083    | 106 down vs n | 0             | -0.225189   | -4.4112     | -4.4112  | 106 down vs n | 0           | -0.225189   | -4.4112  | -4.4112       | 106 down vs n | 0           | -0.225189 | -4.4112       | -4.4112     | 106 down vs n | 0 | -0.225189     | -4.4112     | -4.4112     | 106 down vs n | 0             | -0.225189   | -4.4112     | -4.4112  | 106 down vs n | 0           | -0.225189   | -4.4112  |
| HCN2    | 0        | -0.388261     | -2.97509    | -2.97509    | 106 down vs n | 0             | 4.67886     | 4.67886     | 4.67886  | 106 down vs n | 0           | 4.67886     | 4.67886  | 4.67886       | 106 down vs n | 0           | 4.67886   | 4.67886       | 4.67886     | 106 down vs n | 0 | 4.67886       | 4.67886     | 4.67886     | 106 down vs n | 0             | 4.67886     | 4.67886     | 4.67886  | 106 down vs n | 0           | 4.67886     | 4.67886  |
| HCN2    | 0        | -0.178602     | -1.72802    | -1.72802    | 106 down vs n | 0             | 2.40723     | 2.40723     | 2.40723  | 106 down vs n | 0           | 2.40723     | 2.40723  | 2.40723       | 106 down vs n | 0           | 2.40723   | 2.40723       | 2.40723     | 106 down vs n | 0 | 2.40723       | 2.40723     | 2.40723     | 106 down vs n | 0             | 2.40723     | 2.40723     | 2.40723  | 106 down vs n | 0           | 2.40723     | 2.40723  |
| HCN2    | 0        | -0.0670204    | -14.8804    | -14.8804    | 106 down vs n | 0             | 4.64759     | 4.64759     | 4.64759  | 106 down vs n | 0           | 4.64759     | 4.64759  | 4.64759       | 106 down vs n | 0           | 4.64759   | 4.64759       | 4.64759     | 106 down vs n | 0 | 4.64759       | 4.64759     | 4.64759     | 106 down vs n | 0             | 4.64759     | 4.64759     | 4.64759  | 106 down vs n | 0           | 4.64759     | 4.64759  |
| HCN2    | 0        | 2.64207       | 2.64207     | 2.64207     | 106 down vs n | 0             | 1.12196     | 1.12196     | 1.12196  | 106 down vs n | 0           | 1.12196     | 1.12196  | 1.12196       | 106 down vs n | 0           | 1.12196   | 1.12196       | 1.12196     | 106 down vs n | 0 | 1.12196       | 1.12196     | 1.12196     | 106 down vs n | 0             | 1.12196     | 1.12196     | 1.12196  | 106 down vs n | 0           | 1.12196     | 1.12196  |
| HCN2    | 0        | 0.14187       | -0.50201    | -0.50201    | 106 down vs n | 0             | 0.825837    | 1.11658     | 1.11658  | 106 down vs n | 0           | 0.825837    | 1.11658  | 1.11658       | 106 down vs n | 0           | 0.825837  | 1.11658       | 1.11658     | 106 down vs n | 0 | 0.825837      | 1.11658     | 1.11658     | 106 down vs n | 0             | 0.825837    | 1.11658     | 1.11658  | 106 down vs n | 0           | 0.825837    | 1.11658  |
| HCN2    | 0        | 0.122918      | -8.1355     | -8.1355     | 106 down vs n | 0             | 2.51864     | 2.51864     | 2.51864  | 106 down vs n | 0           | 2.51864     | 2.51864  | 2.51864       | 106 down vs n | 0           | 2.51864   | 2.51864       | 2.51864     | 106 down vs n | 0 | 2.51864       | 2.51864     | 2.51864     | 106 down vs n | 0             | 2.51864     | 2.51864     | 2.51864  | 106 down vs n | 0           | 2.51864     | 2.51864  |
| HCN2    | 0        | 0.362588      | -1.7588     | -1.7588     | 106 down vs n | 0             | 3.90805     | 3.90805     | 3.90805  | 106 down vs n | 0           | 3.90805     | 3.90805  | 3.90805       | 106 down vs n | 0           | 3.90805   | 3.90805       | 3.90805     | 106 down vs n | 0 | 3.90805       | 3.90805     | 3.90805     | 106 down vs n | 0             | 3.90805     | 3.90805     | 3.90805  | 106 down vs n | 0           | 3.90805     | 3.90805  |
| HCN2    | 0        | 0.105016      | -6.4545     | -6.4545     | 106 down vs n | 0             | 1.05124     | 1.05124     | 1.05124  | 106 down vs n | 0           | 1.05124     | 1.05124  | 1.05124       | 106 down vs n | 0           | 1.05124   | 1.05124       | 1.05124     | 106 down vs n | 0 | 1.05124       | 1.05124     | 1.05124     | 106 down vs n | 0             | 1.05124     | 1.05124     | 1.05124  | 106 down vs n | 0           | 1.05124     | 1.05124  |
| HCN2    | 3.588142 | -1.82744      | 1.82744     | 1.82744     | 106 up vs n   | 0             | 109.18      | 109.18      | 109.18   | 106 up vs n   | 0           | 109.18      | 109.18   | 109.18        | 106 up vs n   | 0           | 109.18    | 109.18        | 109.18      | 106 up vs n   | 0 | 109.18        | 109.18      | 109.18      | 106 up vs n   | 0             | 109.18      | 109.18      | 109.18   | 106 up vs n   | 0           | 109.18      | 109.18   |
| HCN2    | 0        | 0.632323      | -1.58147    | -1.58147    | 106 down vs n | 0             | 0.946372    | -1.05667    | -1.05667 | 106 down vs n | 0           | 0.946372    | -1.05667 | -1.05667      | 106 down vs n | 0           | 0.946372  | -1.05667      | -1.05667    | 106 down vs n | 0 | 0.946372      | -1.05667    | -1.05667    | 106 down vs n | 0             | 0.946372    | -1.05667    | -1.05667 | 106 down vs n | 0           | 0.946372    | -1.05667 |
| HCN2    | 0        | 0.246624      | -1.20076    | -1.20076    | 106 down vs n | 0             | 0.946372    | -1.05667    | -1.05667 | 106 down vs n | 0           | 0.946372    | -1.05667 | -1.05667      | 106 down vs n | 0           | 0.946372  | -1.05667      | -1.05667    | 106 down vs n | 0 | 0.946372      | -1.05667    | -1.05667    | 106 down vs n | 0             | 0.946372    | -1.05667    | -1.05667 | 106 down vs n | 0           | 0.946372    | -1.05667 |
| HCN2    | 0        | 0.550535      | -1.85163    | -1.85163    | 106 down vs n | 0             | -2.47373    | 2.47373     | 2.47373  | 106 down vs n | 0           | -2.47373    | 2.47373  | 2.47373       | 106 down vs n | 0           | -2.47373  | 2.47373       | 2.47373     | 106 down vs n | 0 | -2.47373      | 2.47373     | 2.47373     | 106 down vs n | 0             | -2.47373    | 2.47373     | 2.47373  | 106 down vs n | 0           | -2.47373    | 2.47373  |
| HCN2    | 0        | 1.17941       | 1.17941     | 1.17941     | 106 up vs n   | 0             | 2.8033      | 2.8033      | 2.8033   | 106 up vs n   | 0           | 2.8033      | 2.8033   | 2.8033        | 106 up vs n   | 0           | 2.8033    | 2.8033        | 2.8033      | 106 up vs n   | 0 | 2.8033        | 2.8033      | 2.8033      | 106 up vs n   | 0             | 2.8033      | 2.8033      | 2.8033   | 106 up vs n   | 0           | 2.8033      | 2.8033   |
| HCN2    | 0        | 0.010364      | -1.54545    | -1.54545    | 106 down vs n | 0             | -0.149304   | -1.49704    | -1.49704 | 106 down vs n | 0           | -0.149304   | -1.49704 | -1.49704      | 106 down vs n | 0           | -0.149304 | -1.49704      | -1.49704    | 106 down vs n | 0 | -0.149304     | -1.49704    | -1.49704    | 106 down vs n | 0             | -0.149304   | -1.49704    | -1.49704 | 106 down vs n | 0           | -0.149304   | -1.49704 |
| HCN2    | 0        | 0.585837      | -1.02183    | -1.02183    | 106 up vs n   | 0             | 1.81148     | 1.81148     | 1.81148  | 106 up vs n   | 0           | 1.81148     | 1.81148  | 1.81148       | 106 up vs n   | 0           | 1.81148   | 1.81148       | 1.81148     | 106 up vs n   | 0 | 1.81148       | 1.81148     | 1.81148     | 106 up vs n   | 0             | 1.81148     | 1.81148     | 1.81148  | 106 up vs n   | 0           | 1.81148     | 1.81148  |
| HCN2    | 0        | 0.0280209     | -12.1063    | -12.1063    | 106 up vs n   | 0             | 3.77225     | 3.77225     | 3.77225  | 106 up vs n   | 0           | 3.77225     | 3.77225  | 3.77225       | 106 up vs n   | 0           | 3.77225   | 3.77225       | 3.77225     | 106 up vs n   | 0 | 3             |             |             |               |               |             |             |          |               |             |             |          |





**Title:** Comparative Multidimensional Molecular Analyses of Pediatric Diffuse Intrinsic Pontine Glioma Reveals Distinct Molecular Subtypes  
**Journal:** Acta Neuropathologica

Javad Nazarian, Children's National Medical Center, Center for Genetic Medicine

Phone: 202-476-6022 Fax: 202-476-6014  
E-mail: [DMcGowan@GMAA.com](mailto:DMcGowan@GMAA.com)

|           |                           |                   |
|-----------|---------------------------|-------------------|
| <b>p:</b> | <b>FoldChannel[10, p:</b> | <b>FoldChanne</b> |
|-----------|---------------------------|-------------------|

[illegible]









Javad Nazarian, Children's National Medical Center, Center for Genetic Medicine

Phone: 202-476-6022 Fax: 202-476-6014  
E-mail: [DMcConnell@CMBAC.com](mailto:DMcConnell@CMBAC.com)

| g. | FoldChange[10] | g. | FoldChange[111] | g. |
|----|----------------|----|-----------------|----|
| 1  | 1.00           | 1  | 1.00            | 1  |
| 2  | 1.00           | 2  | 1.00            | 2  |
| 3  | 1.00           | 3  | 1.00            | 3  |
| 4  | 1.00           | 4  | 1.00            | 4  |
| 5  | 1.00           | 5  | 1.00            | 5  |
| 6  | 1.00           | 6  | 1.00            | 6  |
| 7  | 1.00           | 7  | 1.00            | 7  |
| 8  | 1.00           | 8  | 1.00            | 8  |
| 9  | 1.00           | 9  | 1.00            | 9  |
| 10 | 1.00           | 10 | 1.00            | 10 |
| 11 | 1.00           | 11 | 1.00            | 11 |
| 12 | 1.00           | 12 | 1.00            | 12 |
| 13 | 1.00           | 13 | 1.00            | 13 |
| 14 | 1.00           | 14 | 1.00            | 14 |
| 15 | 1.00           | 15 | 1.00            | 15 |
| 16 | 1.00           | 16 | 1.00            | 16 |
| 17 | 1.00           | 17 | 1.00            | 17 |
| 18 | 1.00           | 18 | 1.00            | 18 |
| 19 | 1.00           | 19 | 1.00            | 19 |
| 20 | 1.00           | 20 | 1.00            | 20 |
| 21 | 1.00           | 21 | 1.00            | 21 |
| 22 | 1.00           | 22 | 1.00            | 22 |
| 23 | 1.00           | 23 | 1.00            | 23 |
| 24 | 1.00           | 24 | 1.00            | 24 |
| 25 | 1.00           | 25 | 1.00            | 25 |
| 26 | 1.00           | 26 | 1.00            | 26 |
| 27 | 1.00           | 27 | 1.00            | 27 |
| 28 | 1.00           | 28 | 1.00            | 28 |
| 29 | 1.00           | 29 | 1.00            | 29 |
| 30 | 1.00           | 30 | 1.00            | 30 |
| 31 | 1.00           | 31 | 1.00            | 31 |
| 32 | 1.00           | 32 | 1.00            | 32 |
| 33 | 1.00           | 33 | 1.00            | 33 |
| 34 | 1.00           | 34 | 1.00            | 34 |
| 35 | 1.00           | 35 | 1.00            | 35 |
| 36 | 1.00           | 36 | 1.00            | 36 |
| 37 | 1.00           | 37 | 1.00            | 37 |
| 38 | 1.00           | 38 | 1.00            | 38 |
| 39 | 1.00           | 39 | 1.00            | 39 |
| 40 | 1.00           | 40 | 1.00            | 40 |
| 41 | 1.00           | 41 | 1.00            | 41 |
| 42 | 1.00           | 42 | 1.00            | 42 |
| 43 | 1.00           | 43 | 1.00            | 43 |
| 44 | 1.00           | 44 | 1.00            | 44 |
| 45 | 1.00           | 45 | 1.00            | 45 |
| 46 | 1.00           | 46 | 1.00            | 46 |
| 47 | 1.00           | 47 | 1.00            | 47 |
| 48 | 1.00           | 48 | 1.00            | 48 |
| 49 | 1.00           | 49 | 1.00            | 49 |
| 50 | 1.00           | 50 | 1.00            | 50 |
| 51 | 1.00           | 51 | 1.00            | 51 |
| 52 | 1.00           | 52 | 1.00            | 52 |
| 53 | 1.00           | 53 | 1.00            | 53 |
| 54 | 1.00           | 54 | 1.00            | 54 |
| 55 | 1.00           | 55 | 1.00            | 55 |
| 56 | 1.00           | 56 | 1.00            | 56 |
| 57 | 1.00           | 57 | 1.00            | 57 |
| 58 | 1.00           | 58 | 1.00            | 58 |
| 59 | 1.00           | 59 | 1.00            | 59 |
| 60 | 1.00           | 60 | 1.00            | 60 |
| 61 | 1.00           | 61 | 1.00            | 61 |
| 62 | 1.00           | 62 | 1.00            | 62 |
| 63 | 1.00           | 63 | 1.00            | 63 |
| 64 | 1.00           | 64 | 1.00            | 64 |
| 65 | 1.00           | 65 | 1.00            | 65 |
| 66 | 1.00           | 66 | 1.00            | 66 |
| 67 | 1.00           | 67 | 1.00            | 67 |
| 68 | 1.00           | 68 | 1.00            | 68 |
| 69 | 1.00           | 69 | 1.00            | 69 |
| 70 | 1.00           | 70 | 1.00            | 70 |
| 71 | 1.00           | 71 | 1.00            | 71 |
| 72 | 1.00           | 72 | 1.00            | 72 |
| 73 | 1.00           | 73 | 1.00            | 73 |
| 74 | 1.00           | 74 | 1.00            | 74 |
| 75 | 1.00           | 75 | 1.00            | 75 |
| 76 | 1.00           | 76 | 1.00            | 76 |
| 77 | 1.00           | 77 | 1.00            | 77 |
| 78 | 1.00           | 78 | 1.00            | 78 |
| 79 | 1.00           | 79 | 1.00            | 79 |
| 80 | 1.00           | 80 |                 |    |

| Gene ID | value(106 vs. n) | Meshratio | Foldchange( 106 vs. n) | (Description) | value(111 vs. n) | Meshratio | Foldchange( 111 vs. n) | (Description) | value(111 vs. n) |
|---------|------------------|-----------|------------------------|---------------|------------------|-----------|------------------------|---------------|------------------|
|---------|------------------|-----------|------------------------|---------------|------------------|-----------|------------------------|---------------|------------------|











Journal: Acta Neuropathologica

Phone: 202-476-6022 Fax: 202-476-6014

| p-         | FoldChange(10               | p-         | FoldChange(111               | p-         |
|------------|-----------------------------|------------|------------------------------|------------|
| value(106) | AdaptiveRatio_FoldChange(10 | value(111) | AdaptiveRatio_FoldChange(111 | value(113) |









**Title:** Comparative Multidimensional Molecular Analyses of Pediatric Diffuse Intrinsic Pontine Glioma Reveals Distinct Molecular Subtypes  
**Journal:** Acta Neuropathologica

Brannon Harmon, Jordan Hall, Eric H. Reabe, Bing An, Melanie Weinart, Brian Reed, Samuel

**Contributors:** H. A. Auer

Javad Nazarian, Children's National Medical Center, Center for Genetic Medicine

Phone: 202-476-6022 Fax: 202-476-6014



Journal: Acta Neuropathologica

Javad Nazarian, Children's National Medical Center, Center for Genetic Medicine

Phone: 202-476-6022 Fax: 202-476-6014  
Email: [DMcGowan@CMAA.org](mailto:DMcGowan@CMAA.org)

|    |                   |                    |
|----|-------------------|--------------------|
| n: | FoldChange(10) n: | FoldChange(111) n: |
|----|-------------------|--------------------|







**Title:** Comparative Multidimensional Molecular Analyses of Pediatric Diffuse Intrinsic Pontine Glioma Reveals Distinct Molecular Subtypes  
**Journal:** Acta Neuropathologica

Javad Nazarian, Children's National Medical Center, Center for Genetic Medicine

Phone: 202-476-6022 Fax: 202-476-6014  
E-mail: [DMorgan@GMDAC.com](mailto:DMorgan@GMDAC.com)

| g: | FoldChannel10 | g: | FoldChannel10 | g: | FoldChannel10 |
|----|---------------|----|---------------|----|---------------|
| 0  | 0             | 0  | 0             | 0  | 0             |
| 1  | 1             | 1  | 1             | 1  | 1             |
| 2  | 2             | 2  | 2             | 2  | 2             |
| 3  | 3             | 3  | 3             | 3  | 3             |
| 4  | 4             | 4  | 4             | 4  | 4             |
| 5  | 5             | 5  | 5             | 5  | 5             |
| 6  | 6             | 6  | 6             | 6  | 6             |
| 7  | 7             | 7  | 7             | 7  | 7             |
| 8  | 8             | 8  | 8             | 8  | 8             |
| 9  | 9             | 9  | 9             | 9  | 9             |
| 10 | 10            | 10 | 10            | 10 | 10            |
| 11 | 11            | 11 | 11            | 11 | 11            |
| 12 | 12            | 12 | 12            | 12 | 12            |
| 13 | 13            | 13 | 13            | 13 | 13            |
| 14 | 14            | 14 | 14            | 14 | 14            |
| 15 | 15            | 15 | 15            | 15 | 15            |
| 16 | 16            | 16 | 16            | 16 | 16            |
| 17 | 17            | 17 | 17            | 17 | 17            |
| 18 | 18            | 18 | 18            | 18 | 18            |
| 19 | 19            | 19 | 19            | 19 | 19            |
| 20 | 20            | 20 | 20            | 20 | 20            |
| 21 | 21            | 21 | 21            | 21 | 21            |
| 22 | 22            | 22 | 22            | 22 | 22            |
| 23 | 23            | 23 | 23            | 23 | 23            |
| 24 | 24            | 24 | 24            | 24 | 24            |
| 25 | 25            | 25 | 25            | 25 | 25            |
| 26 | 26            | 26 | 26            | 26 | 26            |
| 27 | 27            | 27 | 27            | 27 | 27            |
| 28 | 28            | 28 | 28            | 28 | 28            |
| 29 | 29            | 29 | 29            | 29 | 29            |
| 30 | 30            | 30 | 30            | 30 | 30            |
| 31 | 31            | 31 | 31            | 31 | 31            |
| 32 | 32            | 32 | 32            | 32 | 32            |
| 33 | 33            | 33 | 33            | 33 | 33            |
| 34 | 34            | 34 | 34            | 34 | 34            |
| 35 | 35            | 35 | 35            | 35 | 35            |
| 36 | 36            | 36 | 36            | 36 | 36            |
| 37 | 37            | 37 | 37            | 37 | 37            |
| 38 | 38            | 38 | 38            | 38 | 38            |
| 39 | 39            | 39 | 39            | 39 | 39            |
| 40 | 40            | 40 | 40            | 40 | 40            |
| 41 | 41            | 41 | 41            | 41 | 41            |
| 42 | 42            | 42 | 42            | 42 | 42            |
| 43 | 43            | 43 | 43            | 43 | 43            |
| 44 | 44            | 44 | 44            | 44 | 44            |
| 45 | 45            | 45 | 45            | 45 | 45            |
| 46 | 46            | 46 | 46            | 46 | 46            |
| 47 | 47            | 47 | 47            | 47 | 47            |
| 48 | 48            | 48 | 48            | 48 | 48            |
| 49 | 49            | 49 | 49            | 49 | 49            |
| 50 | 50            | 50 | 50            | 50 | 50            |
| 51 | 51            | 51 | 51            | 51 | 51            |
| 52 | 52            | 52 | 52            | 52 | 52            |
| 53 | 53            | 53 | 53            | 53 | 53            |
| 54 | 54            | 54 | 54            | 54 | 54            |
| 55 | 55            | 55 | 55            | 55 | 55            |
| 56 | 56            | 56 | 56            | 56 | 56            |
| 57 | 57            | 57 | 57            | 57 | 57            |
| 58 | 58            | 58 | 58            | 58 | 58            |
| 59 | 59            | 59 | 59            | 59 | 59            |
| 60 | 60            | 60 | 60            | 60 | 60            |
| 61 | 61            | 61 | 61            | 61 | 61            |
| 62 | 62            | 62 | 62            | 62 | 62            |
| 63 | 63            | 63 | 63            | 63 | 63            |
| 64 | 64            | 64 | 64            | 64 | 64            |
| 65 | 65            | 65 | 65            | 65 | 65            |
| 66 | 66            | 66 | 66            | 66 | 66            |
| 67 | 67            | 67 | 67            | 67 | 67            |
| 68 | 68            | 68 | 68            | 68 | 68            |
| 69 | 69            | 69 | 69            | 69 | 69            |
| 70 | 70            | 70 | 70            | 70 | 70            |
| 71 | 71            | 71 | 71            | 71 | 71            |
| 72 | 72            | 72 | 72            | 72 | 72            |
| 73 | 73            | 73 | 73            | 73 | 73            |
| 74 |               |    |               |    |               |

[illegible]





**Title:** Comparative Multidimensional Molecular Analyses of Pediatric Diffuse Intrinsic Pontine Glioma Reveals

**Authors:** Amanda M. Saratsis, Madhuri Kambhampati, Kendall Snyder, Sridevi Yadavilli, Joe Devaney, Brennan Harmon, Jordan Hall, Eric H. Raabe, Ping An, Melanie Weingart, Brian Rood, Suresh Magge, Roger

**Corresponding Author:**  
Javad Nazarian, Children's National Medical Center, Center for Genetic Medicine  
111 Michigan Ave., NW, Washington DC, 20010  
Phone: 202-476-6022 Fax: 202-476-6014  
Email: JNazarian@CNMC.org









**Title:** Comparative Multidimensional Molecular Analyses of Pediatric Diffuse Intrinsic Pontine Glioma Reveals Distinct Molecular Subtypes  
**Journal:** *Acta Neuropathologica*

Javad Nazarian, Children's National Medical Center, Center for Genetic Medicine  
 10.1002/ajmg.b.30010

Email: [INazarian@CNMC.org](mailto:INazarian@CNMC.org)

p- FoldChange[10] p- FoldChange[111] p-

[illegible]





Phone: 202-476-6022 Fax: 202-476-6014

p-                      FoldChange{10 p-                      FoldChange{111 p-

| Gene ID     | Val. 1/2 | Val. 1/2 | Description | Val. 1/2 | Val. 1/2 | Description | Val. 1/2    |
|-------------|----------|----------|-------------|----------|----------|-------------|-------------|
| LOC100131.0 | 4.1295   | 4.1295   | 106 up vs n | 0        | 2.55195  | 2.55195     | 111 up vs n |

|            |          |          |               |          |        |          |               |          |
|------------|----------|----------|---------------|----------|--------|----------|---------------|----------|
| LOC1001310 | 0.136218 | -7.34119 | 106 down vs n | 4.19E-40 | 0.9726 | -1.02817 | 111 down vs n | 2.24E-44 |
|------------|----------|----------|---------------|----------|--------|----------|---------------|----------|

|            |          |          |               |   |          |         |             |   |
|------------|----------|----------|---------------|---|----------|---------|-------------|---|
| LOC1001310 | 0.600485 | -1.66532 | 106 down vs n | 0 | -1.28133 | 1.28133 | 111 up vs n | 0 |
|------------|----------|----------|---------------|---|----------|---------|-------------|---|

|            |           |          |               |   |           |          |               |   |
|------------|-----------|----------|---------------|---|-----------|----------|---------------|---|
| LOC1001310 | -0.043700 | -2.13321 | 100 down vs n | 0 | -0.133213 | -0.44133 | 111 down vs n | 0 |
| LOC1001310 | -4.25665  | 4.25665  | 106 up vs n   | 0 | -8.84708  | 8.84708  | 111 up vs n   | 0 |

| LOC1001310 | -1.03467 | 1.03467 | 106 up vs n | 0 | -0.932401 | -1.0725 | 111 down vs n | 0 |
|------------|----------|---------|-------------|---|-----------|---------|---------------|---|
| LOC1001310 | -1.03467 | 1.03467 | 106 up vs n | 0 | -0.932401 | -1.0725 | 111 down vs n | 0 |

|            |          |         |               |   |         |         |             |   |
|------------|----------|---------|---------------|---|---------|---------|-------------|---|
| LOC1001310 | -2.30526 | 2.30526 | 106 down vs n | 0 | 2.93268 | 2.93268 | 111 up vs n | 0 |
| LOC1001310 | -2.30526 | 2.30526 | 106 up vs n   | 0 | 2.93268 | 2.93268 | 111 up vs n | 0 |

|             |          |         |               |          |          |          |               |   |
|-------------|----------|---------|---------------|----------|----------|----------|---------------|---|
| LOC10013110 | -2.20153 | 2.20153 | 106 down vs n | 0        | 0.977024 | -1.02352 | 111 down vs n | 0 |
| LOC10013110 | -2.20153 | 2.20153 | 106 up vs n   | 5.69E-36 | 0.977024 | -1.02352 | 111 down vs n | 0 |

|                  |         |          |               |   |           |         |               |   |
|------------------|---------|----------|---------------|---|-----------|---------|---------------|---|
| LOC100131841E-44 | 0.39552 | -2.52832 | 106 down vs n | 0 | -0.355013 | -2.8168 | 111 down vs n | 0 |
|------------------|---------|----------|---------------|---|-----------|---------|---------------|---|

|            |          |          |               |   |         |         |             |   |
|------------|----------|----------|---------------|---|---------|---------|-------------|---|
| LOC1001310 | 0.441962 | -2.26264 | 106 down vs n | 0 | 2.92948 | 2.92948 | 111 up vs n | 0 |
|------------|----------|----------|---------------|---|---------|---------|-------------|---|

|             |          |          |               |   |         |          |               |          |
|-------------|----------|----------|---------------|---|---------|----------|---------------|----------|
| LOC10013110 | 0.332803 | -1.81184 | 100 down vs n | 0 | 1.23010 | 1.23010  | 111 up vs n   | 2.73E-41 |
| LOC10013110 | 0.236128 | -4.23499 | 106 down vs n | 0 | 0.36696 | -2.72509 | 111 down vs n | 1.06E-39 |

| LOC        | 20170222   | 20170222 | 100 down vs n | 0 | 2.7018 | 2.7018 | 111 up vs n | 0 |
|------------|------------|----------|---------------|---|--------|--------|-------------|---|
| LOC1001310 | -0.0564459 | -17.7161 | 106 down vs n | 0 | 2.7018 | 2.7018 | 111 up vs n | 0 |

|             |          |          |               |   |          |          |               |   |
|-------------|----------|----------|---------------|---|----------|----------|---------------|---|
| LOC10013110 | 1.04689  | -1.04689 | 100 up vs n   | 0 | 2.18092  | -2.18092 | 112 up vs n   | 0 |
| LOC10013110 | 0.727168 | -1.3752  | 106 down vs n | 0 | 0.728355 | -1.37296 | 111 down vs n | 0 |

|            |         |          |               |   |          |         |             |          |
|------------|---------|----------|---------------|---|----------|---------|-------------|----------|
| LOC1001310 | 0.41945 | -2.38407 | 106 down vs n | 0 | -1.81514 | 1.81514 | 111 up vs n | 3.52E-40 |
|------------|---------|----------|---------------|---|----------|---------|-------------|----------|

|              |            |          |               |   |          |         |             |   |
|--------------|------------|----------|---------------|---|----------|---------|-------------|---|
| LOC100109130 | -0.0365429 | -27.3651 | 106 up vs n   | 0 | -1.75432 | 1.75432 | 111 up vs n | 0 |
| LOC1001310   | -0.0365429 | -27.3651 | 106 down vs n | 0 | -1.75432 | 1.75432 | 111 up vs n | 0 |

|            |         |         |             |   |          |          |               |   |
|------------|---------|---------|-------------|---|----------|----------|---------------|---|
| LOC1001310 | 1.35016 | 1.35016 | 106 up vs n | 0 | 0.239581 | -4.17395 | 111 down vs n | 0 |
|------------|---------|---------|-------------|---|----------|----------|---------------|---|

| LOC1001310 | 0.132161 | -7.56651 | 106 down vs n | 0 | -0.0834069 | -11.9894 | 111 down vs n | 0 |
|------------|----------|----------|---------------|---|------------|----------|---------------|---|
| LOC1001310 | 0.132161 | -7.56651 | 106 down vs n | 0 | -0.0834069 | -11.9894 | 111 down vs n | 0 |

| LOC        | 0.172502 | -5.79704 | 106 down vs n | 3.46E-42 | 0.911232 | -1.09742 | 111 down vs n | 0 |
|------------|----------|----------|---------------|----------|----------|----------|---------------|---|
| LOC1001310 | 0.172502 | -5.79704 | 106 down vs n | 3.46E-42 | 0.911232 | -1.09742 | 111 down vs n | 0 |

|             |           |          |               |   |         |         |             |   |
|-------------|-----------|----------|---------------|---|---------|---------|-------------|---|
| LOC10013110 | 0.5123771 | -3.18883 | 100 down vs n | 0 | 2.41474 | 2.41474 | 111 up vs n | 0 |
| LOC10013110 | 0.528065  | -1.89371 | 106 down vs n | 0 | 4.75808 | 4.75808 | 111 up vs n | 0 |

|            |          |         |             |   |          |         |             |   |
|------------|----------|---------|-------------|---|----------|---------|-------------|---|
| LOC1001310 | -3.90105 | 3.90105 | 106 up vs n | 0 | -2.96371 | 2.96371 | 111 up vs n | 0 |
|------------|----------|---------|-------------|---|----------|---------|-------------|---|

|             |          |          |               |   |          |          |               |   |
|-------------|----------|----------|---------------|---|----------|----------|---------------|---|
| LOC10013110 | 0.264317 | -3.78334 | 106 down vs n | 0 | 0.601209 | -1.66331 | 111 down vs n | 0 |
|-------------|----------|----------|---------------|---|----------|----------|---------------|---|

|             |         |         |             |   |         |         |             |   |
|-------------|---------|---------|-------------|---|---------|---------|-------------|---|
| LOC10013130 | 18.5707 | 18.5707 | 106 up vs n | 0 | 10.2524 | 10.2524 | 111 up vs n | 0 |
|-------------|---------|---------|-------------|---|---------|---------|-------------|---|

| LOC100131300 | 0.301172 | -3.32036 | 106 down vs n | 0 | 3.45932 | 3.45932 | 111 up vs n | 0 |
|--------------|----------|----------|---------------|---|---------|---------|-------------|---|
| LOC100131300 | 0.301172 | -3.32036 | 106 down vs n | 0 | 3.45932 | 3.45932 | 111 up vs n | 0 |

|            |           |          |               |   |         |         |             |   |
|------------|-----------|----------|---------------|---|---------|---------|-------------|---|
| LOC1001310 | 2.57412   | 2.57412  | 106 up vs n   | 0 | 2.57412 | 2.57412 | 111 up vs n | 0 |
| LOC1001310 | 0.0599595 | -16.6779 | 106 down vs n | 0 | 2.69469 | 2.69469 | 111 up vs n | 0 |

|                  |          |          |               |   |          |          |               |   |
|------------------|----------|----------|---------------|---|----------|----------|---------------|---|
| LOC10013110      | -0.15134 | -7.55621 | 100 down vs n | 0 | -0.00000 | -1.00000 | 111 down vs n | 0 |
| LOC100131140E-45 | 5.16731  | 5.16731  | 106 up vs n   | 0 | -175.58  | 175.58   | 111 up vs n   | 0 |

|              |          |          |               |   |          |         |             |   |
|--------------|----------|----------|---------------|---|----------|---------|-------------|---|
| LOC100131040 | 0.338447 | -2.95467 | 106 up vs n   | 0 | -3.85666 | 3.85666 | 111 up vs n | 0 |
| LOC1001310   | 0.338447 | -2.95467 | 106 down vs n | 0 | -3.85666 | 3.85666 | 111 up vs n | 0 |

|            |         |         |             |   |          |         |             |   |
|------------|---------|---------|-------------|---|----------|---------|-------------|---|
| LOC1001310 | 2.38031 | 2.38031 | 106 up vs n | 0 | -11.5126 | 11.5126 | 111 up vs n | 0 |
|------------|---------|---------|-------------|---|----------|---------|-------------|---|

| LOC1001316 | 0.110735 | -9.03054 | 106 down vs n | 7.78E-38 | -0.66264 | -1.50912 | 111 down vs n | 0 |
|------------|----------|----------|---------------|----------|----------|----------|---------------|---|
| LOC1001316 | 0.110735 | -9.03054 | 106 down vs n | 7.78E-38 | -0.66264 | -1.50912 | 111 down vs n | 0 |

|            |         |         |             |   |          |         |             |          |
|------------|---------|---------|-------------|---|----------|---------|-------------|----------|
| LOC1001310 | 2.75464 | 2.75464 | 106 up vs n | 0 | -1.47353 | 1.47353 | 111 up vs n | 1.40E-45 |
|------------|---------|---------|-------------|---|----------|---------|-------------|----------|

|                    |           |           |               |   |           |          |             |          |
|--------------------|-----------|-----------|---------------|---|-----------|----------|-------------|----------|
| LOC10013130        | 4.581288  | -4.581288 | 100 up vs n   | 0 | -5.35E-42 | 5.35E-42 | 111 up vs n | 0        |
| LOC10013131.19E-43 | -0.996384 | -1.00363  | 106 down vs n | 0 | -27.757   | 27.757   | 111 up vs n | 5.35E-42 |

| LOC10013130 | 0.130248 | -7.67768 | 106 down vs n | 0 | 5.70465 | 5.70465 | 111 up vs n | 0 |
|-------------|----------|----------|---------------|---|---------|---------|-------------|---|
| LOC10013130 | 0.130248 | -7.67768 | 106 down vs n | 0 | 5.70465 | 5.70465 | 111 up vs n | 0 |

|            |          |          |               |   |         |         |             |   |
|------------|----------|----------|---------------|---|---------|---------|-------------|---|
| LOC1001310 | 0.101237 | -3.33946 | 100 down vs n | 0 | 17.1953 | 17.1953 | 111 up vs n | 0 |
| LOC1001310 | 0.11967  | -8.35632 | 106 down vs n | 0 | 17.1953 | 17.1953 | 111 up vs n | 0 |

|             |            |          |               |   |           |         |               |   |
|-------------|------------|----------|---------------|---|-----------|---------|---------------|---|
| LOC10013110 | -0.0283855 | -35.2293 | 106 down vs n | 0 | 0.0714084 | -14.004 | 111 down vs n | 0 |
| LOC10013110 | -0.0283855 | -35.2293 | 106 down vs n | 0 | 0.0714084 | -14.004 | 111 down vs n | 0 |

|            |           |          |               |   |           |          |               |   |
|------------|-----------|----------|---------------|---|-----------|----------|---------------|---|
| LOC1001310 | -0.276827 | -3.61237 | 106 down vs n | 0 | -0.409672 | -2.44098 | 111 down vs n | 0 |
|------------|-----------|----------|---------------|---|-----------|----------|---------------|---|

|           |          |          |          |               |   |          |         |             |          |
|-----------|----------|----------|----------|---------------|---|----------|---------|-------------|----------|
| LOC100131 | 5.17E-40 | 0.305355 | -3.27488 | 106 down vs n | 0 | -160.344 | 160.344 | 111 up vs n | 2.80E-45 |
|-----------|----------|----------|----------|---------------|---|----------|---------|-------------|----------|

|            |           |          |               |   |          |          |             |   |
|------------|-----------|----------|---------------|---|----------|----------|-------------|---|
| LOC1001310 | -1.9473   | -1.9473  | 100 up vs n   | 0 | -1.11333 | -1.11333 | 111 up vs n | 0 |
| LOC1001310 | 0.0824025 | -12.1356 | 106 down vs n | 0 | 1.713    | 1.713    | 111 up vs n | 0 |

|            |          |          |               |   |         |         |             |   |
|------------|----------|----------|---------------|---|---------|---------|-------------|---|
| LOC1001310 | 0.363697 | -2.74954 | 106 down vs n | 0 | 2.97452 | 2.97452 | 111 up vs n | 0 |
|------------|----------|----------|---------------|---|---------|---------|-------------|---|

[illegible]

















































Journal: Acta Neuropathologica

Brennan Harmon, Jordan Hall, Eric H. Raabe, Ping An, Melanie Weingart, Brian Rood, Suresh Marge, Roger J. Packer, Jayad N.

**Commanding Author**

Javad Nazarian, Children's National Medical Center, Center for Genetic Medicine

Phone: 202-476-6022 Fax: 202-476-6014

File: ISM\_10 (Online Resource 10)

Title: Comparative Multidimensional Molecular Analyses of Pelagic Diffuse Intrinsic Purine Gloms Reveals Distinct Molecular Subtypes

Journal: Acta Neurologica Scandinavica

Authors: Amanda M. Stransky, Madhuri Kumbhakar, Kendall Snyder, Sidicki Yadhavi, Joe Devenney,

Brennan Harmon, Jordan Hall, Eric H. Raabe, Ping An, Melanie Weingart, Brian Reid, Sarah Magge, Roger J. Packer, Javad Nazarian

Corresponding Author:

Javad Nazarian, Children's National Medical Center, Center for Genetic Medicine,

111 Michigan Ave., NW, Washington DC, 20010

Phone: 202-476-6014; Fax: 202-476-6014

Email: J.Nazarian@CNMC.org

| FoldChange111 |           |           |            |         |           |           |            |         |           | FoldChange112 |            |         |           |           |            |         |           |           |            | FoldChange121 |           |           |            |         |           |           |            |         |           | FoldChange137 |            |         |           |           |            |         |           |           |            | FoldChange153 |           |           |            |         |           |           |            |         |           | FoldChange157 |            |         |           |           |            |         |           |           |            | FoldChange165 |           |           |            |         |           |           |            |         |           |           |            |         |           |           |            |         |           |           |            |         |           |           |            |         |           |           |            |         |           |           |            |         |           |           |            |         |           |           |            |         |           |           |            |         |           |           |            |         |           |           |            |         |           |           |            |         |           |           |            |         |           |           |            |         |           |           |            |         |           |           |            |         |           |           |            |         |           |           |            |         |           |           |            |         |           |           |            |         |           |           |            |         |           |           |            |         |           |           |            |         |           |           |            |         |           |           |            |         |           |           |            |         |           |           |            |         |           |           |            |         |           |           |            |         |           |           |            |         |           |           |            |         |           |           |            |         |           |           |            |         |           |           |            |         |           |           |            |         |           |           |            |         |           |           |            |         |           |           |            |         |           |           |            |         |           |           |            |         |           |           |            |         |           |           |            |         |           |           |            |         |           |           |            |         |           |           |            |         |           |           |            |         |           |           |            |         |           |           |            |         |           |           |            |         |           |           |            |         |           |           |            |         |           |           |            |         |           |           |            |         |           |           |            |         |           |           |            |         |           |           |            |         |           |           |            |         |           |           |            |         |           |           |            |         |           |           |            |         |           |           |            |         |           |           |            |         |           |           |            |         |           |           |            |         |           |           |            |         |           |           |            |         |           |           |            |         |           |           |            |         |           |           |            |         |           |           |            |         |           |           |            |         |           |           |            |         |           |           |            |         |           |           |            |         |           |           |            |         |           |           |            |         |           |           |            |         |           |           |            |         |           |           |            |         |           |           |            |         |           |           |            |         |           |           |            |         |           |           |            |         |           |           |            |         |           |           |            |         |           |           |            |         |           |           |            |         |           |           |            |         |           |           |            |         |           |           |            |         |           |           |            |         |           |           |            |         |           |           |            |         |           |           |            |         |           |           |            |         |           |           |            |         |           |           |            |         |           |           |            |         |           |           |            |         |           |           |            |         |           |           |            |         |           |           |            |         |           |           |            |         |           |           |            |         |           |           |            |         |           |           |            |         |           |           |            |         |           |           |            |         |           |           |            |         |           |           |            |         |           |           |            |         |           |           |            |         |           |           |            |         |           |           |            |         |           |           |            |         |           |           |            |         |           |           |            |         |           |           |            |         |           |           |            |         |           |           |            |         |           |           |            |         |           |           |            |         |           |           |            |         |           |           |            |         |           |           |            |         |           |           |            |         |           |           |            |         |           |           |            |         |           |           |            |         |           |           |            |         |           |           |            |         |           |           |            |         |           |           |            |         |           |           |            |         |           |           |            |         |           |           |            |         |           |           |            |         |           |           |            |         |           |           |            |         |           |           |            |         |           |           |            |         |           |           |            |         |           |           |            |         |           |           |            |         |           |           |            |         |           |           |            |         |           |           |            |         |           |           |            |         |           |           |            |         |           |           |            |         |           |           |            |         |           |           |            |         |           |
|---------------|-----------|-----------|------------|---------|-----------|-----------|------------|---------|-----------|---------------|------------|---------|-----------|-----------|------------|---------|-----------|-----------|------------|---------------|-----------|-----------|------------|---------|-----------|-----------|------------|---------|-----------|---------------|------------|---------|-----------|-----------|------------|---------|-----------|-----------|------------|---------------|-----------|-----------|------------|---------|-----------|-----------|------------|---------|-----------|---------------|------------|---------|-----------|-----------|------------|---------|-----------|-----------|------------|---------------|-----------|-----------|------------|---------|-----------|-----------|------------|---------|-----------|-----------|------------|---------|-----------|-----------|------------|---------|-----------|-----------|------------|---------|-----------|-----------|------------|---------|-----------|-----------|------------|---------|-----------|-----------|------------|---------|-----------|-----------|------------|---------|-----------|-----------|------------|---------|-----------|-----------|------------|---------|-----------|-----------|------------|---------|-----------|-----------|------------|---------|-----------|-----------|------------|---------|-----------|-----------|------------|---------|-----------|-----------|------------|---------|-----------|-----------|------------|---------|-----------|-----------|------------|---------|-----------|-----------|------------|---------|-----------|-----------|------------|---------|-----------|-----------|------------|---------|-----------|-----------|------------|---------|-----------|-----------|------------|---------|-----------|-----------|------------|---------|-----------|-----------|------------|---------|-----------|-----------|------------|---------|-----------|-----------|------------|---------|-----------|-----------|------------|---------|-----------|-----------|------------|---------|-----------|-----------|------------|---------|-----------|-----------|------------|---------|-----------|-----------|------------|---------|-----------|-----------|------------|---------|-----------|-----------|------------|---------|-----------|-----------|------------|---------|-----------|-----------|------------|---------|-----------|-----------|------------|---------|-----------|-----------|------------|---------|-----------|-----------|------------|---------|-----------|-----------|------------|---------|-----------|-----------|------------|---------|-----------|-----------|------------|---------|-----------|-----------|------------|---------|-----------|-----------|------------|---------|-----------|-----------|------------|---------|-----------|-----------|------------|---------|-----------|-----------|------------|---------|-----------|-----------|------------|---------|-----------|-----------|------------|---------|-----------|-----------|------------|---------|-----------|-----------|------------|---------|-----------|-----------|------------|---------|-----------|-----------|------------|---------|-----------|-----------|------------|---------|-----------|-----------|------------|---------|-----------|-----------|------------|---------|-----------|-----------|------------|---------|-----------|-----------|------------|---------|-----------|-----------|------------|---------|-----------|-----------|------------|---------|-----------|-----------|------------|---------|-----------|-----------|------------|---------|-----------|-----------|------------|---------|-----------|-----------|------------|---------|-----------|-----------|------------|---------|-----------|-----------|------------|---------|-----------|-----------|------------|---------|-----------|-----------|------------|---------|-----------|-----------|------------|---------|-----------|-----------|------------|---------|-----------|-----------|------------|---------|-----------|-----------|------------|---------|-----------|-----------|------------|---------|-----------|-----------|------------|---------|-----------|-----------|------------|---------|-----------|-----------|------------|---------|-----------|-----------|------------|---------|-----------|-----------|------------|---------|-----------|-----------|------------|---------|-----------|-----------|------------|---------|-----------|-----------|------------|---------|-----------|-----------|------------|---------|-----------|-----------|------------|---------|-----------|-----------|------------|---------|-----------|-----------|------------|---------|-----------|-----------|------------|---------|-----------|-----------|------------|---------|-----------|-----------|------------|---------|-----------|-----------|------------|---------|-----------|-----------|------------|---------|-----------|-----------|------------|---------|-----------|-----------|------------|---------|-----------|-----------|------------|---------|-----------|-----------|------------|---------|-----------|-----------|------------|---------|-----------|-----------|------------|---------|-----------|-----------|------------|---------|-----------|-----------|------------|---------|-----------|-----------|------------|---------|-----------|-----------|------------|---------|-----------|-----------|------------|---------|-----------|-----------|------------|---------|-----------|-----------|------------|---------|-----------|-----------|------------|---------|-----------|-----------|------------|---------|-----------|-----------|------------|---------|-----------|-----------|------------|---------|-----------|-----------|------------|---------|-----------|-----------|------------|---------|-----------|-----------|------------|---------|-----------|-----------|------------|---------|-----------|-----------|------------|---------|-----------|-----------|------------|---------|-----------|-----------|------------|---------|-----------|-----------|------------|---------|-----------|-----------|------------|---------|-----------|-----------|------------|---------|-----------|-----------|------------|---------|-----------|-----------|------------|---------|-----------|-----------|------------|---------|-----------|-----------|------------|---------|-----------|-----------|------------|---------|-----------|-----------|------------|---------|-----------|-----------|------------|---------|-----------|-----------|------------|---------|-----------|-----------|------------|---------|-----------|-----------|------------|---------|-----------|-----------|------------|---------|-----------|-----------|------------|---------|-----------|-----------|------------|---------|-----------|-----------|------------|---------|-----------|-----------|------------|---------|-----------|-----------|------------|---------|-----------|-----------|------------|---------|-----------|-----------|------------|---------|-----------|-----------|------------|---------|-----------|-----------|------------|---------|-----------|-----------|------------|---------|-----------|-----------|------------|---------|-----------|-----------|------------|---------|-----------|-----------|------------|---------|-----------|-----------|------------|---------|-----------|-----------|------------|---------|-----------|-----------|------------|---------|-----------|-----------|------------|---------|-----------|-----------|------------|---------|-----------|-----------|------------|---------|-----------|-----------|------------|---------|-----------|-----------|------------|---------|-----------|-----------|------------|---------|-----------|-----------|------------|---------|-----------|-----------|------------|---------|-----------|-----------|------------|---------|-----------|-----------|------------|---------|-----------|
| Gene ID       | MeanRatio | MeanRatio | FoldChange | p-value | MeanRatio | MeanRatio | FoldChange | p-value | MeanRatio | MeanRatio     | FoldChange | p-value | MeanRatio | MeanRatio | FoldChange | p-value | MeanRatio | MeanRatio | FoldChange | p-value       | MeanRatio | MeanRatio | FoldChange | p-value | MeanRatio | MeanRatio | FoldChange | p-value | MeanRatio | MeanRatio     | FoldChange | p-value | MeanRatio | MeanRatio | FoldChange | p-value | MeanRatio | MeanRatio | FoldChange | p-value       | MeanRatio | MeanRatio | FoldChange | p-value | MeanRatio | MeanRatio | FoldChange | p-value | MeanRatio | MeanRatio     | FoldChange | p-value | MeanRatio | MeanRatio | FoldChange | p-value | MeanRatio | MeanRatio | FoldChange | p-value       | MeanRatio | MeanRatio | FoldChange | p-value | MeanRatio | MeanRatio | FoldChange | p-value | MeanRatio | MeanRatio | FoldChange | p-value | MeanRatio | MeanRatio | FoldChange | p-value | MeanRatio | MeanRatio | FoldChange | p-value | MeanRatio | MeanRatio | FoldChange | p-value | MeanRatio | MeanRatio | FoldChange | p-value | MeanRatio | MeanRatio | FoldChange | p-value | MeanRatio | MeanRatio | FoldChange | p-value | MeanRatio | MeanRatio | FoldChange | p-value | MeanRatio | MeanRatio | FoldChange | p-value | MeanRatio | MeanRatio | FoldChange | p-value | MeanRatio | MeanRatio | FoldChange | p-value | MeanRatio | MeanRatio | FoldChange | p-value | MeanRatio | MeanRatio | FoldChange | p-value | MeanRatio | MeanRatio | FoldChange | p-value | MeanRatio | MeanRatio | FoldChange | p-value | MeanRatio | MeanRatio | FoldChange | p-value | MeanRatio | MeanRatio | FoldChange | p-value | MeanRatio | MeanRatio | FoldChange | p-value | MeanRatio | MeanRatio | FoldChange | p-value | MeanRatio | MeanRatio | FoldChange | p-value | MeanRatio | MeanRatio | FoldChange | p-value | MeanRatio | MeanRatio | FoldChange | p-value | MeanRatio | MeanRatio | FoldChange | p-value | MeanRatio | MeanRatio | FoldChange | p-value | MeanRatio | MeanRatio | FoldChange | p-value | MeanRatio | MeanRatio | FoldChange | p-value | MeanRatio | MeanRatio | FoldChange | p-value | MeanRatio | MeanRatio | FoldChange | p-value | MeanRatio | MeanRatio | FoldChange | p-value | MeanRatio | MeanRatio | FoldChange | p-value | MeanRatio | MeanRatio | FoldChange | p-value | MeanRatio | MeanRatio | FoldChange | p-value | MeanRatio | MeanRatio | FoldChange | p-value | MeanRatio | MeanRatio | FoldChange | p-value | MeanRatio | MeanRatio | FoldChange | p-value | MeanRatio | MeanRatio | FoldChange | p-value | MeanRatio | MeanRatio | FoldChange | p-value | MeanRatio | MeanRatio | FoldChange | p-value | MeanRatio | MeanRatio | FoldChange | p-value | MeanRatio | MeanRatio | FoldChange | p-value | MeanRatio | MeanRatio | FoldChange | p-value | MeanRatio | MeanRatio | FoldChange | p-value | MeanRatio | MeanRatio | FoldChange | p-value | MeanRatio | MeanRatio | FoldChange | p-value | MeanRatio | MeanRatio | FoldChange | p-value | MeanRatio | MeanRatio | FoldChange | p-value | MeanRatio | MeanRatio | FoldChange | p-value | MeanRatio | MeanRatio | FoldChange | p-value | MeanRatio | MeanRatio | FoldChange | p-value | MeanRatio | MeanRatio | FoldChange | p-value | MeanRatio | MeanRatio | FoldChange | p-value | MeanRatio | MeanRatio | FoldChange | p-value | MeanRatio | MeanRatio | FoldChange | p-value | MeanRatio | MeanRatio | FoldChange | p-value | MeanRatio | MeanRatio | FoldChange | p-value | MeanRatio | MeanRatio | FoldChange | p-value | MeanRatio | MeanRatio | FoldChange | p-value | MeanRatio | MeanRatio | FoldChange | p-value | MeanRatio | MeanRatio | FoldChange | p-value | MeanRatio | MeanRatio | FoldChange | p-value | MeanRatio | MeanRatio | FoldChange | p-value | MeanRatio | MeanRatio | FoldChange | p-value | MeanRatio | MeanRatio | FoldChange | p-value | MeanRatio | MeanRatio | FoldChange | p-value | MeanRatio | MeanRatio | FoldChange | p-value | MeanRatio | MeanRatio | FoldChange | p-value | MeanRatio | MeanRatio | FoldChange | p-value | MeanRatio | MeanRatio | FoldChange | p-value | MeanRatio | MeanRatio | FoldChange | p-value | MeanRatio | MeanRatio | FoldChange | p-value | MeanRatio | MeanRatio | FoldChange | p-value | MeanRatio | MeanRatio | FoldChange | p-value | MeanRatio | MeanRatio | FoldChange | p-value | MeanRatio | MeanRatio | FoldChange | p-value | MeanRatio | MeanRatio | FoldChange | p-value | MeanRatio | MeanRatio | FoldChange | p-value | MeanRatio | MeanRatio | FoldChange | p-value | MeanRatio | MeanRatio | FoldChange | p-value | MeanRatio | MeanRatio | FoldChange | p-value | MeanRatio | MeanRatio | FoldChange | p-value | MeanRatio | MeanRatio | FoldChange | p-value | MeanRatio | MeanRatio | FoldChange | p-value | MeanRatio | MeanRatio | FoldChange | p-value | MeanRatio | MeanRatio | FoldChange | p-value | MeanRatio | MeanRatio | FoldChange | p-value | MeanRatio | MeanRatio | FoldChange | p-value | MeanRatio | MeanRatio | FoldChange | p-value | MeanRatio | MeanRatio | FoldChange | p-value | MeanRatio | MeanRatio | FoldChange | p-value | MeanRatio | MeanRatio | FoldChange | p-value | MeanRatio | MeanRatio | FoldChange | p-value | MeanRatio | MeanRatio | FoldChange | p-value | MeanRatio | MeanRatio | FoldChange | p-value | MeanRatio | MeanRatio | FoldChange | p-value | MeanRatio | MeanRatio | FoldChange | p-value | MeanRatio | MeanRatio | FoldChange | p-value | MeanRatio | MeanRatio | FoldChange | p-value | MeanRatio | MeanRatio | FoldChange | p-value | MeanRatio | MeanRatio | FoldChange | p-value | MeanRatio | MeanRatio | FoldChange | p-value | MeanRatio | MeanRatio | FoldChange | p-value | MeanRatio | MeanRatio | FoldChange | p-value | MeanRatio | MeanRatio | FoldChange | p-value | MeanRatio | MeanRatio | FoldChange | p-value | MeanRatio | MeanRatio | FoldChange | p-value | MeanRatio | MeanRatio | FoldChange | p-value | MeanRatio | MeanRatio | FoldChange | p-value | MeanRatio | MeanRatio | FoldChange | p-value | MeanRatio | MeanRatio | FoldChange | p-value | MeanRatio | MeanRatio | FoldChange | p-value | MeanRatio | MeanRatio | FoldChange | p-value | MeanRatio | MeanRatio | FoldChange | p-value | MeanRatio | MeanRatio | FoldChange | p-value | MeanRatio | MeanRatio | FoldChange | p-value | MeanRatio | MeanRatio | FoldChange | p-value | MeanRatio | MeanRatio | FoldChange | p-value | MeanRatio | MeanRatio | FoldChange | p-value | MeanRatio | MeanRatio | FoldChange | p-value | MeanRatio | MeanRatio | FoldChange | p-value | MeanRatio | MeanRatio | FoldChange | p-value | MeanRatio | MeanRatio | FoldChange | p-value | MeanRatio | MeanRatio | FoldChange | p-value | MeanRatio | MeanRatio | FoldChange | p-value | MeanRatio | MeanRatio | FoldChange | p-value | MeanRatio | MeanRatio | FoldChange | p-value | MeanRatio | MeanRatio | FoldChange | p-value | MeanRatio | MeanRatio | FoldChange | p-value | MeanRatio | MeanRatio | FoldChange | p-value | MeanRatio | MeanRatio | FoldChange | p-value | MeanRatio | MeanRatio | FoldChange | p-value | MeanRatio | MeanRatio | FoldChange | p-value | MeanRatio | MeanRatio | FoldChange | p-value | MeanRatio | MeanRatio | FoldChange | p-value | MeanRatio | MeanRatio | FoldChange | p-value | MeanRatio | MeanRatio | FoldChange | p-value | MeanRatio | MeanRatio | FoldChange | p-value | MeanRatio | MeanRatio | FoldChange | p-value | MeanRatio | MeanRatio | FoldChange | p-value | MeanRatio | MeanRatio | FoldChange | p-value | MeanRatio | MeanRatio | FoldChange | p-value | MeanRatio | MeanRatio | FoldChange | p-value | MeanRatio | MeanRatio | FoldChange | p-value | MeanRatio | MeanRatio | FoldChange | p-value | MeanRatio | MeanRatio | FoldChange | p-value | MeanRatio | MeanRatio | FoldChange | p-value | MeanRatio | MeanRatio | FoldChange | p-value | MeanRatio | MeanRatio | FoldChange | p-value | MeanRatio | MeanRatio | FoldChange | p-value | MeanRatio | MeanRatio | FoldChange | p-value | MeanRatio | MeanRatio | FoldChange | p-value | MeanRatio | MeanRatio | FoldChange | p-value | MeanRatio | MeanRatio | FoldChange | p-value | MeanRatio |





















Journal: Acta Neuropathologica

Javad Nazarian, Children's National Medical Center, Center for Genetic Medicine

Phone: 202-476-6022 Fax: 202-476-6014  
E-mail: [DMcGowan@CMAA.org](mailto:DMcGowan@CMAA.org)

|             |           |          |               |   |         |         |             |   |         |         |             |   |          |          |               |   |          |          |               |   |         |         |             |   |          |         |             |   |        |        |             |   |         |   |   |
|-------------|-----------|----------|---------------|---|---------|---------|-------------|---|---------|---------|-------------|---|----------|----------|---------------|---|----------|----------|---------------|---|---------|---------|-------------|---|----------|---------|-------------|---|--------|--------|-------------|---|---------|---|---|
| LOC643233.0 | -0.164448 | -6.08097 | 106 down vs n | 0 | 3.34637 | 3.34637 | 111 up vs n | 0 | 3.74011 | 3.74011 | 112 up vs n | 0 | 0.775189 | -1.29001 | 121 down vs n | 0 | 0.984577 | -1.01566 | 347 down vs n | 0 | 2.05172 | 2.05172 | 353 up vs n | 0 | -10.3613 | 10.3613 | 537 up vs n | 0 | 1.1686 | 1.1686 | 563 up vs n | ? | 142.026 | 0 | 1 |
|-------------|-----------|----------|---------------|---|---------|---------|-------------|---|---------|---------|-------------|---|----------|----------|---------------|---|----------|----------|---------------|---|---------|---------|-------------|---|----------|---------|-------------|---|--------|--------|-------------|---|---------|---|---|













**Title:** Comparative Multidimensional Molecular Analyses of Pediatric Diffuse Intrinsic Pontine Glioma Reveals Distinct Molecular Subtypes  
**Journal:** Acta Neuropathologica

Javad Nazarian, Children's National Medical Center, Center for  
111 Michigan Ave. NW, Washington DC 20010

Email: JNazarian@CNMC.org

Link/106 Mann Basin, FieldChannel

| Week   | Week 1 | Week 2 | Week 3 | Week 4 | Week 5 | Week 6 | Week 7 | Week 8 | Week 9  | Week 10 | Week 11 | Week 12 | Week 13 | Week 14 | Week 15 | Week 16 | Week 17 | Week 18 | Week 19 | Week 20 | Week 21 | Week 22 | Week 23 | Week 24 | Week 25 | Week 26 | Week 27 | Week 28 | Week 29 | Week 30 | Week 31 | Week 32 | Week 33 | Week 34 | Week 35 | Week 36 | Week 37 | Week 38 | Week 39 | Week 40 | Week 41 | Week 42 | Week 43 | Week 44 | Week 45 | Week 46 | Week 47 | Week 48 | Week 49 | Week 50 | Week 51 | Week 52 |
|--------|--------|--------|--------|--------|--------|--------|--------|--------|---------|---------|---------|---------|---------|---------|---------|---------|---------|---------|---------|---------|---------|---------|---------|---------|---------|---------|---------|---------|---------|---------|---------|---------|---------|---------|---------|---------|---------|---------|---------|---------|---------|---------|---------|---------|---------|---------|---------|---------|---------|---------|---------|---------|
| Week 1 | Week 2 | Week 3 | Week 4 | Week 5 | Week 6 | Week 7 | Week 8 | Week 9 | Week 10 | Week 11 | Week 12 | Week 13 | Week 14 | Week 15 | Week 16 | Week 17 | Week 18 | Week 19 | Week 20 | Week 21 | Week 22 | Week 23 | Week 24 | Week 25 | Week 26 | Week 27 | Week 28 | Week 29 | Week 30 | Week 31 | Week 32 | Week 33 | Week 34 | Week 35 | Week 36 | Week 37 | Week 38 | Week 39 | Week 40 | Week 41 | Week 42 | Week 43 | Week 44 | Week 45 | Week 46 | Week 47 | Week 48 | Week 49 | Week 50 | Week 51 | Week 52 |         |









**Corresponding Author:**  
Frank J. Marshall, MD, PhD, National Multiple Sclerosis Center for Genetic Medicine

111 Michigan Ave., NW, Washington DC, 20010  
Phone: 202-476-6022 Fax: 202-476-6014  
Email: JNazarian@CNMC.org











File: ESM\_10 (Online Resource 10)

Figure: Comparative Multivariate Molecular Analyses of Pediatric Diffuse Intrinsic Gliomas Reveals Distinct Molecular Subtypes  
Journal: Acta Neuropathologica

Authors: Amanda M. Stranski, Madhuri Kumbhakar, Kendall Snyder, Sidney Yavitt, Joe Devenney, Brennan Harmon, Jordan Hall, Eric H. Rubie, Ping An, Melanie Weingart, Brian Ross, Sarah Marge, Roger J. Packer, Javad Nazarian

Corresponding Author:

Javad Nazarian, Children's National Medical Center, Center for Genetic Medicine  
111 Michigan Ave., NW, Washington DC, 20010  
Phone: 202-476-6022 Fax: 202-476-6014  
Email: J.Nazarian@CNMCC.org

| value106 |  | FOLDCHANGE106 |  | value111 |  | FOLDCHANGE111 |  | value112 |  | FOLDCHANGE112 |  | value121 |  | FOLDCHANGE121 |  | value137 |  | FOLDCHANGE137 |  | value343 |  | FOLDCHANGE343 |  | value357 |  | FOLDCHANGE357 |  | value561 |  | FOLDCHANGE561 |  | value564 |  | FOLDCHANGE564 |  | value568 |  | FOLDCHANGE568 |  | value570 |  | FOLDCHANGE570 |  | value571 |  | FOLDCHANGE571 |  | value572 |  | FOLDCHANGE572 |  | value573 |  | FOLDCHANGE573 |  | value574 |  | FOLDCHANGE574 |  | value575 |  | FOLDCHANGE575 |  | value576 |  | FOLDCHANGE576 |  | value577 |  | FOLDCHANGE577 |  | value578 |  | FOLDCHANGE578 |  | value579 |  | FOLDCHANGE579 |  | value580 |  | FOLDCHANGE580 |  | value581 |  | FOLDCHANGE581 |  | value582 |  | FOLDCHANGE582 |  | value583 |  | FOLDCHANGE583 |  | value584 |  | FOLDCHANGE584 |  | value585 |  | FOLDCHANGE585 |  | value586 |  | FOLDCHANGE586 |  | value587 |  | FOLDCHANGE587 |  | value588 |  | FOLDCHANGE588 |  | value589 |  | FOLDCHANGE589 |  | value590 |  | FOLDCHANGE590 |  | value591 |  | FOLDCHANGE591 |  | value592 |  | FOLDCHANGE592 |  | value593 |  | FOLDCHANGE593 |  | value594 |  | FOLDCHANGE594 |  | value595 |  | FOLDCHANGE595 |  | value596 |  | FOLDCHANGE596 |  | value597 |  | FOLDCHANGE597 |  | value598 |  | FOLDCHANGE598 |  | value599 |  | FOLDCHANGE599 |  | value600 |  | FOLDCHANGE600 |  | value601 |  | FOLDCHANGE601 |  | value602 |  | FOLDCHANGE602 |  | value603 |  | FOLDCHANGE603 |  | value604 |  | FOLDCHANGE604 |  | value605 |  | FOLDCHANGE605 |  | value606 |  | FOLDCHANGE606 |  | value607 |  | FOLDCHANGE607 |  | value608 |  | FOLDCHANGE608 |  | value609 |  | FOLDCHANGE609 |  | value610 |  | FOLDCHANGE610 |  | value611 |  | FOLDCHANGE611 |  | value612 |  | FOLDCHANGE612 |  | value613 |  | FOLDCHANGE613 |  | value614 |  | FOLDCHANGE614 |  | value615 |  | FOLDCHANGE615 |  | value616 |  | FOLDCHANGE616 |  | value617 |  | FOLDCHANGE617 |  | value618 |  | FOLDCHANGE618 |  | value619 |  | FOLDCHANGE619 |  | value620 |  | FOLDCHANGE620 |  | value621 |  | FOLDCHANGE621 |  | value622 |  | FOLDCHANGE622 |  | value623 |  | FOLDCHANGE623 |  | value624 |  | FOLDCHANGE624 |  | value625 |  | FOLDCHANGE625 |  | value626 |  | FOLDCHANGE626 |  | value627 |  | FOLDCHANGE627 |  | value628 |  | FOLDCHANGE628 |  | value629 |  | FOLDCHANGE629 |  | value630 |  | FOLDCHANGE630 |  | value631 |  | FOLDCHANGE631 |  | value632 |  | FOLDCHANGE632 |  | value633 |  | FOLDCHANGE633 |  | value634 |  | FOLDCHANGE634 |  | value635 |  | FOLDCHANGE635 |  | value636 |  | FOLDCHANGE636 |  | value637 |  | FOLDCHANGE637 |  | value638 |  | FOLDCHANGE638 |  | value639 |  | FOLDCHANGE639 |  | value640 |  | FOLDCHANGE640 |  | value641 |  | FOLDCHANGE641 |  | value642 |  | FOLDCHANGE642 |  | value643 |  | FOLDCHANGE643 |  | value644 |  | FOLDCHANGE644 |  | value645 |  | FOLDCHANGE645 |  | value646 |  | FOLDCHANGE646 |  | value647 |  | FOLDCHANGE647 |  | value648 |  | FOLDCHANGE648 |  | value649 |  | FOLDCHANGE649 |  | value650 |  | FOLDCHANGE650 |  | value651 |  | FOLDCHANGE651 |  | value652 |  | FOLDCHANGE652 |  | value653 |  | FOLDCHANGE653 |  | value654 |  | FOLDCHANGE654 |  | value655 |  | FOLDCHANGE655 |  | value656 |  | FOLDCHANGE656 |  | value657 |  | FOLDCHANGE657 |  | value658 |  | FOLDCHANGE658 |  | value659 |  | FOLDCHANGE659 |  | value660 |  | FOLDCHANGE660 |  | value661 |  | FOLDCHANGE661 |  | value662 |  | FOLDCHANGE662 |  | value663 |  | FOLDCHANGE663 |  | value664 |  | FOLDCHANGE664 |  | value665 |  | FOLDCHANGE665 |  | value666 |  | FOLDCHANGE666 |  | value667 |  | FOLDCHANGE667 |  | value668 |  | FOLDCHANGE668 |  | value669 |  | FOLDCHANGE669 |  | value670 |  | FOLDCHANGE670 |  | value671 |  | FOLDCHANGE671 |  | value672 |  | FOLDCHANGE672 |  | value673 |  | FOLDCHANGE673 |  | value674 |  | FOLDCHANGE674 |  | value675 |  | FOLDCHANGE675 |  | value676 |  | FOLDCHANGE676 |  | value677 |  | FOLDCHANGE677 |  | value678 |  | FOLDCHANGE678 |  | value679 |  | FOLDCHANGE679 |  | value680 |  | FOLDCHANGE680 |  | value681 |  | FOLDCHANGE681 |  | value682 |  | FOLDCHANGE682 |  | value683 |  | FOLDCHANGE683 |  | value684 |  | FOLDCHANGE684 |  | value685 |  | FOLDCHANGE685 |  | value686 |  | FOLDCHANGE686 |  | value687 |  | FOLDCHANGE687 |  | value688 |  | FOLDCHANGE688 |  | value689 |  | FOLDCHANGE689 |  | value690 |  | FOLDCHANGE690 |  | value691 |  | FOLDCHANGE691 |  | value692 |  | FOLDCHANGE692 |  | value693 |  | FOLDCHANGE693 |  | value694 |  | FOLDCHANGE694 |  | value695 |  | FOLDCHANGE695 |  | value696 |  | FOLDCHANGE696 |  | value697 |  | FOLDCHANGE697 |  | value698 |  | FOLDCHANGE698 |  | value699 |  | FOLDCHANGE699 |  | value700 |  | FOLDCHANGE700 |  | value701 |  | FOLDCHANGE701 |  | value702 |  | FOLDCHANGE702 |  | value703 |  | FOLDCHANGE703 |  | value704 |  | FOLDCHANGE704 |  | value705 |  | FOLDCHANGE705 |  | value706 |  | FOLDCHANGE706 |  | value707 |  | FOLDCHANGE707 |  | value708 |  | FOLDCHANGE708 |  | value709 |  | FOLDCHANGE709 |  | value710 |  | FOLDCHANGE710 |  | value711 |  | FOLDCHANGE711 |  | value712 |  | FOLDCHANGE712 |  | value713 |  | FOLDCHANGE713 |  | value714 |  | FOLDCHANGE714 |  | value715 |  | FOLDCHANGE715 |  | value716 |  | FOLDCHANGE716 |  | value717 |  | FOLDCHANGE717 |  | value718 |  | FOLDCHANGE718 |  | value719 |  | FOLDCHANGE719 |  | value720 |  | FOLDCHANGE720 |  | value721 |  | FOLDCHANGE721 |  | value722 |  | FOLDCHANGE722 |  | value723 |  | FOLDCHANGE723 |  | value724 |  | FOLDCHANGE724 |  | value725 |  | FOLDCHANGE725 |  | value726 |  | FOLDCHANGE726 |  | value727 |  | FOLDCHANGE727 |  | value728 |  | FOLDCHANGE728 |  | value729 |  | FOLDCHANGE729 |  | value730 |  | FOLDCHANGE730 |  | value731 |  | FOLDCHANGE731 |  | value732 |  | FOLDCHANGE732 |  | value733 |  | FOLDCHANGE733 |  | value734 |  | FOLDCHANGE734 |  | value735 |  | FOLDCHANGE735 |  | value736 |  | FOLDCHANGE736 |  | value737 |  | FOLDCHANGE737 |  | value738 |  | FOLDCHANGE738 |  | value739 |  | FOLDCHANGE739 |  | value740 |  | FOLDCHANGE740 |  | value741 |  | FOLDCHANGE741 |  | value742 |  | FOLDCHANGE742 |  | value743 |  | FOLDCHANGE743 |  | value744 |  | FOLDCHANGE744 |  | value745 |  | FOLDCHANGE745 |  | value746 |  | FOLDCHANGE746 |  | value747 |  | FOLDCHANGE747 |  | value748 |  | FOLDCHANGE748 |  | value749 |  | FOLDCHANGE749 |  | value750 |  | FOLDCHANGE750 |  | value751 |  | FOLDCHANGE751 |  | value752 |  | FOLDCHANGE752 |  | value753 |  | FOLDCHANGE753 |  | value754 |  | FOLDCHANGE754 |  | value755 |  | FOLDCHANGE755 |  | value756 |  | FOLDCHANGE756 |  | value757 |  | FOLDCHANGE757 |  | value758 |  | FOLDCHANGE758 |  | value759 |  | FOLDCHANGE759 |  | value760 |  | FOLDCHANGE760 |  | value761 |  | FOLDCHANGE761 |  | value762 |  | FOLDCHANGE762 |  | value763 |  | FOLDCHANGE763 |  | value764 |  | FOLDCHANGE764 |  | value765 |  | FOLDCHANGE765 |  | value766 |  | FOLDCHANGE766 |  | value767 |  | FOLDCHANGE767 |  | value768 |  | FOLDCHANGE768 |  | value769 |  | FOLDCHANGE769 |  | value770 |  | FOLDCHANGE770 |  | value771 |  | FOLDCHANGE771 |  | value772 |  | FOLDCHANGE772 |  | value773 |  | FOLDCHANGE773 |  | value774 |  | FOLDCHANGE774 |  | value775 |  | FOLDCHANGE775 |  | value776 |  | FOLDCHANGE776 |  | value777 |  | FOLDCHANGE777 |  | value778 |  | FOLDCHANGE778 |  | value779 |  | FOLDCHANGE779 |  | value780 |  | FOLDCHANGE780 |  | value781 |  | FOLDCHANGE781 |  | value782 |  | FOLDCHANGE782 |  | value783 |  | FOLDCHANGE783 |  | value784 |  | FOLDCHANGE784 |  | value785 |  | FOLDCHANGE785 |  | value786 |  | FOLDCHANGE786 |  | value787 |  | FOLDCHANGE787 |  | value788 |  | FOLDCHANGE788 |  | value789 |  | FOLDCHANGE789 |  | value790 |  | FOLDCHANGE790 |  | value791 |  | FOLDCHANGE791 |  | value792 |  | FOLDCHANGE792 |  | value793 |  | FOLDCHANGE793 |  | value794 |  | FOLDCHANGE794 |  | value795 |  | FOLDCHANGE795 |  | value796 |  | FOLDCHANGE796 |  | value797 |  | FOLDCHANGE797 |  | value798 |  | FOLDCHANGE798 |  | value799 |  | FOLDCHANGE799 |  | value800 |  | FOLDCHANGE800 |  | value801 |  | FOLDCHANGE801 |  | value802 |  | FOLDCHANGE802 |  | value803 |  | FOLDCHANGE803 |  | value804 |  | FOLDCHANGE804 |  | value805 |  | FOLDCHANGE805 |  | value806 |  | FOLDCHANGE806 |  | value807 |  | FOLDCHANGE807 |  | value808 |  | FOLDCHANGE808 |  | value809 |  | FOLDCHANGE809 |  | value810 |  | FOLDCHANGE810 |  | value811 |  | FOLDCHANGE811 |  | value812 |  | FOLDCHANGE812 |  | value813 |  | FOLDCHANGE813 |  | value814 |  | FOLDCHANGE814 |  | value815 |  | FOLDCHANGE815 |  | value816 |  | FOLDCHANGE816 |  | value817 |  | FOLDCHANGE817 |  | value818 |  | FOLDCHANGE818 |  | value819 |  | FOLDCHANGE819 |  | value820 |  | FOLDCHANGE820 |  | value821 |  | FOLDCHANGE821 |  | value822 |  | FOLDCHANGE822 |  | value823 |  | FOLDCHANGE823 |  | value824 |  | FOLDCHANGE824 |  | value825 |  | FOLDCHANGE825 |  | value826 |  | FOLDCHANGE826 |  | value827 |  | FOLDCHANGE827 |  | value828 |  | FOLDCHANGE828 |  | value829 |  | FOLDCHANGE829 |  | value830 |  | FOLDCHANGE830 |  | value831 |  | FOLDCHANGE831 |  | value832 |  | FOLDCHANGE832 |  | value833 |  | FOLDCHANGE833 |  | value834 |  | FOLDCHANGE834 |  | value835 |  | FOLDCHANGE835 |  | value836 |  | FOLDCHANGE836 |  | value837 |  | FOLDCHANGE837 |  | value838 |  | FOLDCHANGE838 |  | value839 |  | FOLDCHANGE839 |  | value840 |  | FOLDCHANGE840 |  | value841 |  | FOLDCHANGE841 |  | value842 |  | FOLDCHANGE842 |  | value843 |  | FOLDCHANGE843 |  | value844 |  | FOLDCHANGE844 |  | value845 |  | FOLDCHANGE845 |  | value846 |  | FOLDCHANGE846 |  | value847 |  | FOLDCHANGE847 |  | value848 |  | FOLDCHANGE848 |  | value849 |  | FOLDCHANGE849 |  | value850 |  | FOLDCHANGE850 |  | value851 |  | FOLDCHANGE851 |  | value852 |  | FOLDCHANGE852 |  | value853 |  | FOLDCHANGE853 |  | value854 |  | FOLDCHANGE854 |  | value855 |  | FOLDCHANGE855 |  | value856 |  | FOLDCHANGE856 |  | value857 |  | FOLDCHANGE857 |  | value858 |  | FOLDCHANGE858 |  | value859 |  | FOLDCHANGE859 |  | value860 |  | FOLDCHANGE860 |  | value861 |  | FOLDCHANGE861 |  | value862 |  | FOLDCHANGE862 |  | value863 |  | FOLDCHANGE863 |  | value864 |  | FOLDCHANGE864 |  | value865 |  | FOLDCHANGE865 |  | value866 |  | FOLDCHANGE866 |  | value867 |  | FOLDCHANGE867 |  | value868 |  | FOLDCHANGE868 |  | value869 |  | FOLDCHANGE869 |  | value870 |  | FOLDCHANGE870 |  | value871 |  | FOLDCHANGE871 |  | value872 |  | FOLDCHANGE872 |  | value873 |  | FOLDCHANGE873 |  | value874 |  | FOLDCHANGE874 |  | value875 |  | FOLDCHANGE875 |  | value876 |  | FOLDCHANGE876 |  | value877 |  | FOLDCHANGE877 |  | value878 |  | FOLDCHANGE878 |  | value879 |  | FOLDCHANGE879 |  | value880 |  | FOLDCHANGE880 |  | value881 |  | FOLDCHANGE881 |  | value882 |  | FOLDCHANGE882 |  | value883 |  | FOLDCHANGE883 |  | value884 |  | FOLDCHANGE884 |  | value885 |  | FOLDCHANGE885 |  | value886 |  | FOLDCHANGE886 |  | value887 |  | FOLDCHANGE887 |  | value888 |  | FOLDCHANGE888 |  | value889 |  | FOLDCHANGE889 |  | value890 |  | FOLDCHANGE890 |  | value891 |  | FOLDCHANGE891 |  | value892 |  | FOLDCHANGE892 |  | value893 |  | FOLDCHANGE893 |  | value894 |  | FOLDCHANGE894 |  | value895 |  | FOLDCHANGE895 |  | value896 |  | FOLDCHANGE896 |  | value897 |  | FOLDCHANGE897 |  | value898 |  | FOLDCHANGE898 |  | value899 |  | FOLDCHANGE899 |  | value900 |  | FOLDCHANGE900 |  | value901 |  | FOLDCHANGE901 |  | value902 |  | FOLDCHANGE902 |  | value903 |  | FOLDCHANGE903 |  | value904 |  | FOLDCHANGE904 |  | value905 |  | FOLDCHANGE905 |  | value906 |  | FOLDCHANGE906 |  | value907 |  | FOLDCHANGE907 |  | value908 |  | FOLDCHANGE908 |  | value909 |  | FOLDCHANGE909 |  | value910 |  | FOLDCHANGE910 |  | value911 |  | FOLDCHANGE911 |  | value912 |  | FOLDCHANGE912 |  | value913 |  | FOLDCHANGE913 |  | value914 |  | FOLDCHANGE914 |  | value915 |  | FOLDCHANGE915 |  | value916 |  | FOLDCHANGE916 |  | value917 |  | FOLDCHANGE917 |  | value918 |  | FOLDCHANGE918 |  | value919 |  | FOLDCHANGE919 |  | value920 |  | FOLDCHANGE920 |  | value921 |  | FOLDCHANGE921 |  | value922 |  | FOLDCHANGE922 |  | value923 |  | FOLDCHANGE923 |  | value924 |  | FOLDCHANGE924 |  | value925 |  | FOLDCHANGE925 |  | value926 |  | FOLDCHANGE926 |  | value927 |  | FOLDCHANGE927 |  | value928 |  | FOLDCHANGE928 |  | value929 |  | FOLDCHANGE929 |  | value930 |  | FOLDCHANGE930 |  | value931 |  | FOLDCHANGE931 |  | value932 |  | FOLDCHANGE932 |  | value933 |  | FOLDCHANGE933 |  | value934 |  | FOLDCHANGE934 |  | value935 |  | FOLDCHANGE935 |  | value936 |  | FOLDCHANGE936 |  | value937 |  | FOLDCHANGE937 |  | value938 |  | FOLDCHANGE938 |  | value939 |  | FOLDCHANGE939 |  | value940 |  | FOLDCHANGE940 |  | value941 |  | FOLDCHANGE941 |  | value942 |  | FOLDCHANGE942 |  | value943 |  | FOLDCHANGE943 |  | value944 |  | FOLDCHANGE944 |  | value945 |  | FOLDCHANGE945 |  | value946 |  | FOLDCHANGE946 |  | value947 |  | FOLDCHANGE947 |  | value948 |  | FOLDCHANGE948 |  | value949 |  | FOLDCHANGE949 |  | value950 |  | FOLDCHANGE950 |  | value951 |  | FOLDCHANGE951 |  | value952 |  | FOLDCHANGE952 |  | value953 |  | FOLDCHANGE953 |  | value954 |  | FOLDCHANGE954 |  | value955 |  | FOLDCHANGE955 |  | value956 |  | FOLDCHANGE956 |  | value957 |  | FOLDCHANGE957 |  | value958 |  | FOLDCHANGE958 |  | value959 |  | FOLDCHANGE959 |  | value960 |  | FOLDCHANGE960 |  | value961 |  | FOLDCHANGE961 |  | value962 |  | FOLDCHANGE962 |  | value963 |  | FOLDCHANGE963 |  | value964 |  | FOLDCHANGE964 |  | value965 |  | FOLDCHANGE965 |  | value966 |  | FOLDCHANGE966 |  | value967 |  | FOLDCHANGE967 |  | value968 |  | FOLDCHANGE968 |  | value969 |  | FOLDCHANGE969 |  | value970 |  | FOLDCHANGE970 |  | value971 |  | FOLDCHANGE971 |  | value972 |  | FOLDCHANGE972 |  | value973 |  | FOLDCHANGE973 |  | value974 |  | FOLDCHANGE974 |  | value975 |  | FOLDCHANGE975 |  | value976 |  | FOLDCHANGE976 |  | value977 |  | FOLDCHANGE977 |  | value978 |  | FOLDCHANGE978 |  | value979 |  | FOLDCHANGE979 |  | value980 |  | FOLDCHANGE980 |  | value981 |  | FOLDCHANGE981 |  | value982 |  | FOLDCHANGE982 |  | value983 |  | FOLDCHANGE983 |  | value984 |  | FOLDCHANGE984 |  | value985 |  | FOLDCHANGE985 |  | value986 |  | FOLDCHANGE986 |  | value987 |  | FOLDCHANGE987 |  | value988 |  | FOLDCHANGE988 |  | value989 |  | FOLDCHANGE989 |  | value990 |  | FOLDCHANGE990 |  | value991 |  | FOLDCHANGE991 |  | value992 |  | FOLDCHANGE992 |  | value993 |  | FOLDCHANGE993 |  | value994 |  | FOLDCHANGE994 |  | value995 |  | FOLDCHANGE995 |  | value996 |  | FOLDCHANGE996 |  | value997 |  | FOLDCHANGE997 |  | value998 |  | FOLDCHANGE998 |  | value999 |  | FOLDCHANGE999 |  | value1000 |  | FOLDCHANGE1000 |  | value1001 |  | FOLDCHANGE1001 |  | value1002 |  | FOLDCHANGE1002 |  | value1003 |  | FOLDCHANGE1003 |  | value1004 |  | FOLDCHANGE1004 |  | value1005 |  | FOLDCHANGE1005 |  | value1006 |  | FOLDCHANGE1006 |  | value1007 |  | FOLDCHANGE1007 |  | value1008 |  | FOLDCHANGE1008 |  | value1009 |  | FOLDCHANGE1009 |  | value1010 |  | FOLDCHANGE1010 |  | value1011 |  | FOLDCHANGE1011 |  | value1012 |  | FOLDCHANGE1012 |  | value1013 |  | FOLDCHANGE1013 |  | value1014 |  | FOLDCHANGE1014 |  | value1015 |  | FOLDCHANGE1015 |  | value1016 |  | FOLDCHANGE1016 |  | value1017 |  | FOLDCHANGE1017 |  | value1018 |  | FOLDCHANGE1018 |  | value1019 |  | FOLDCHANGE1019 |  | value1020 |  | FOLDCHANGE1020 |  | value1021 |  | FOLDCHANGE1021 |  | value1022 |  | FOLDCHANGE1022 |  | value1023 |  | FOLDCHANGE1023 |  | value1024 |  | FOLDCHANGE1024 |  | value1025 |  | FOLDCHANGE1025 |  | value1026 |  | FOLDCHANGE1026 |  | value1027 |  | FOLDCHANGE1027 |  | value1028 |  | FOLDCHANGE1028 |  | value1029 |  | FOLDCHANGE1029 |  | value1030 |  | FOLDCHANGE1030 |  | value1031 |  | FOLDCHANGE1031 |  | value1032 |  | FOLDCHANGE1032 |  | value1033 |  |
|----------|--|---------------|--|----------|--|---------------|--|----------|--|---------------|--|----------|--|---------------|--|----------|--|---------------|--|----------|--|---------------|--|----------|--|---------------|--|----------|--|---------------|--|----------|--|---------------|--|----------|--|---------------|--|----------|--|---------------|--|----------|--|---------------|--|----------|--|---------------|--|----------|--|---------------|--|----------|--|---------------|--|----------|--|---------------|--|----------|--|---------------|--|----------|--|---------------|--|----------|--|---------------|--|----------|--|---------------|--|----------|--|---------------|--|----------|--|---------------|--|----------|--|---------------|--|----------|--|---------------|--|----------|--|---------------|--|----------|--|---------------|--|----------|--|---------------|--|----------|--|---------------|--|----------|--|---------------|--|----------|--|---------------|--|----------|--|---------------|--|----------|--|---------------|--|----------|--|---------------|--|----------|--|---------------|--|----------|--|---------------|--|----------|--|---------------|--|----------|--|---------------|--|----------|--|---------------|--|----------|--|---------------|--|----------|--|---------------|--|----------|--|---------------|--|----------|--|---------------|--|----------|--|---------------|--|----------|--|---------------|--|----------|--|---------------|--|----------|--|---------------|--|----------|--|---------------|--|----------|--|---------------|--|----------|--|---------------|--|----------|--|---------------|--|----------|--|---------------|--|----------|--|---------------|--|----------|--|---------------|--|----------|--|---------------|--|----------|--|---------------|--|----------|--|---------------|--|----------|--|---------------|--|----------|--|---------------|--|----------|--|---------------|--|----------|--|---------------|--|----------|--|---------------|--|----------|--|---------------|--|----------|--|---------------|--|----------|--|---------------|--|----------|--|---------------|--|----------|--|---------------|--|----------|--|---------------|--|----------|--|---------------|--|----------|--|---------------|--|----------|--|---------------|--|----------|--|---------------|--|----------|--|---------------|--|----------|--|---------------|--|----------|--|---------------|--|----------|--|---------------|--|----------|--|---------------|--|----------|--|---------------|--|----------|--|---------------|--|----------|--|---------------|--|----------|--|---------------|--|----------|--|---------------|--|----------|--|---------------|--|----------|--|---------------|--|----------|--|---------------|--|----------|--|---------------|--|----------|--|---------------|--|----------|--|---------------|--|----------|--|---------------|--|----------|--|---------------|--|----------|--|---------------|--|----------|--|---------------|--|----------|--|---------------|--|----------|--|---------------|--|----------|--|---------------|--|----------|--|---------------|--|----------|--|---------------|--|----------|--|---------------|--|----------|--|---------------|--|----------|--|---------------|--|----------|--|---------------|--|----------|--|---------------|--|----------|--|---------------|--|----------|--|---------------|--|----------|--|---------------|--|----------|--|---------------|--|----------|--|---------------|--|----------|--|---------------|--|----------|--|---------------|--|----------|--|---------------|--|----------|--|---------------|--|----------|--|---------------|--|----------|--|---------------|--|----------|--|---------------|--|----------|--|---------------|--|----------|--|---------------|--|----------|--|---------------|--|----------|--|---------------|--|----------|--|---------------|--|----------|--|---------------|--|----------|--|---------------|--|----------|--|---------------|--|----------|--|---------------|--|----------|--|---------------|--|----------|--|---------------|--|----------|--|---------------|--|----------|--|---------------|--|----------|--|---------------|--|----------|--|---------------|--|----------|--|---------------|--|----------|--|---------------|--|----------|--|---------------|--|----------|--|---------------|--|----------|--|---------------|--|----------|--|---------------|--|----------|--|---------------|--|----------|--|---------------|--|----------|--|---------------|--|----------|--|---------------|--|----------|--|---------------|--|----------|--|---------------|--|----------|--|---------------|--|----------|--|---------------|--|----------|--|---------------|--|----------|--|---------------|--|----------|--|---------------|--|----------|--|---------------|--|----------|--|---------------|--|----------|--|---------------|--|----------|--|---------------|--|----------|--|---------------|--|----------|--|---------------|--|----------|--|---------------|--|----------|--|---------------|--|----------|--|---------------|--|----------|--|---------------|--|----------|--|---------------|--|----------|--|---------------|--|----------|--|---------------|--|----------|--|---------------|--|----------|--|---------------|--|----------|--|---------------|--|----------|--|---------------|--|----------|--|---------------|--|----------|--|---------------|--|----------|--|---------------|--|----------|--|---------------|--|----------|--|---------------|--|----------|--|---------------|--|----------|--|---------------|--|----------|--|---------------|--|----------|--|---------------|--|----------|--|---------------|--|----------|--|---------------|--|----------|--|---------------|--|----------|--|---------------|--|----------|--|---------------|--|----------|--|---------------|--|----------|--|---------------|--|----------|--|---------------|--|----------|--|---------------|--|----------|--|---------------|--|----------|--|---------------|--|----------|--|---------------|--|----------|--|---------------|--|----------|--|---------------|--|----------|--|---------------|--|----------|--|---------------|--|----------|--|---------------|--|----------|--|---------------|--|----------|--|---------------|--|----------|--|---------------|--|----------|--|---------------|--|----------|--|---------------|--|----------|--|---------------|--|----------|--|---------------|--|----------|--|---------------|--|----------|--|---------------|--|----------|--|---------------|--|----------|--|---------------|--|----------|--|---------------|--|----------|--|---------------|--|----------|--|---------------|--|----------|--|---------------|--|----------|--|---------------|--|----------|--|---------------|--|----------|--|---------------|--|----------|--|---------------|--|----------|--|---------------|--|----------|--|---------------|--|----------|--|---------------|--|----------|--|---------------|--|----------|--|---------------|--|----------|--|---------------|--|----------|--|---------------|--|----------|--|---------------|--|----------|--|---------------|--|----------|--|---------------|--|----------|--|---------------|--|----------|--|---------------|--|----------|--|---------------|--|----------|--|---------------|--|----------|--|---------------|--|----------|--|---------------|--|----------|--|---------------|--|----------|--|---------------|--|----------|--|---------------|--|----------|--|---------------|--|----------|--|---------------|--|----------|--|---------------|--|----------|--|---------------|--|----------|--|---------------|--|----------|--|---------------|--|----------|--|---------------|--|----------|--|---------------|--|----------|--|---------------|--|----------|--|---------------|--|----------|--|---------------|--|----------|--|---------------|--|----------|--|---------------|--|----------|--|---------------|--|----------|--|---------------|--|----------|--|---------------|--|----------|--|---------------|--|----------|--|---------------|--|----------|--|---------------|--|----------|--|---------------|--|----------|--|---------------|--|----------|--|---------------|--|----------|--|---------------|--|----------|--|---------------|--|----------|--|---------------|--|----------|--|---------------|--|----------|--|---------------|--|----------|--|---------------|--|----------|--|---------------|--|----------|--|---------------|--|----------|--|---------------|--|----------|--|---------------|--|----------|--|---------------|--|----------|--|---------------|--|----------|--|---------------|--|----------|--|---------------|--|----------|--|---------------|--|----------|--|---------------|--|----------|--|---------------|--|----------|--|---------------|--|----------|--|---------------|--|----------|--|---------------|--|----------|--|---------------|--|----------|--|---------------|--|----------|--|---------------|--|----------|--|---------------|--|----------|--|---------------|--|----------|--|---------------|--|----------|--|---------------|--|----------|--|---------------|--|----------|--|---------------|--|----------|--|---------------|--|----------|--|---------------|--|----------|--|---------------|--|----------|--|---------------|--|----------|--|---------------|--|----------|--|---------------|--|----------|--|---------------|--|----------|--|---------------|--|----------|--|---------------|--|----------|--|---------------|--|----------|--|---------------|--|----------|--|---------------|--|----------|--|---------------|--|----------|--|---------------|--|----------|--|---------------|--|----------|--|---------------|--|----------|--|---------------|--|----------|--|---------------|--|----------|--|---------------|--|----------|--|---------------|--|----------|--|---------------|--|----------|--|---------------|--|----------|--|---------------|--|----------|--|---------------|--|----------|--|---------------|--|----------|--|---------------|--|----------|--|---------------|--|----------|--|---------------|--|----------|--|---------------|--|----------|--|---------------|--|----------|--|---------------|--|----------|--|---------------|--|----------|--|---------------|--|----------|--|---------------|--|----------|--|---------------|--|----------|--|---------------|--|----------|--|---------------|--|----------|--|---------------|--|----------|--|---------------|--|----------|--|---------------|--|----------|--|---------------|--|----------|--|---------------|--|----------|--|---------------|--|----------|--|---------------|--|----------|--|---------------|--|----------|--|---------------|--|----------|--|---------------|--|----------|--|---------------|--|----------|--|---------------|--|----------|--|---------------|--|----------|--|---------------|--|----------|--|---------------|--|----------|--|---------------|--|----------|--|---------------|--|----------|--|---------------|--|----------|--|---------------|--|----------|--|---------------|--|----------|--|---------------|--|----------|--|---------------|--|----------|--|---------------|--|----------|--|---------------|--|----------|--|---------------|--|----------|--|---------------|--|----------|--|---------------|--|----------|--|---------------|--|----------|--|---------------|--|----------|--|---------------|--|----------|--|---------------|--|----------|--|---------------|--|----------|--|---------------|--|----------|--|---------------|--|----------|--|---------------|--|----------|--|---------------|--|----------|--|---------------|--|----------|--|---------------|--|----------|--|---------------|--|----------|--|---------------|--|----------|--|---------------|--|----------|--|---------------|--|----------|--|---------------|--|----------|--|---------------|--|----------|--|---------------|--|----------|--|---------------|--|----------|--|---------------|--|----------|--|---------------|--|----------|--|---------------|--|----------|--|---------------|--|----------|--|---------------|--|----------|--|---------------|--|----------|--|---------------|--|----------|--|---------------|--|----------|--|---------------|--|----------|--|---------------|--|----------|--|---------------|--|----------|--|---------------|--|----------|--|---------------|--|----------|--|---------------|--|----------|--|---------------|--|----------|--|---------------|--|----------|--|---------------|--|----------|--|---------------|--|----------|--|---------------|--|----------|--|---------------|--|----------|--|---------------|--|----------|--|---------------|--|----------|--|---------------|--|----------|--|---------------|--|----------|--|---------------|--|----------|--|---------------|--|----------|--|---------------|--|----------|--|---------------|--|----------|--|---------------|--|----------|--|---------------|--|----------|--|---------------|--|----------|--|---------------|--|----------|--|---------------|--|----------|--|---------------|--|----------|--|---------------|--|----------|--|---------------|--|----------|--|---------------|--|----------|--|---------------|--|----------|--|---------------|--|----------|--|---------------|--|----------|--|---------------|--|----------|--|---------------|--|----------|--|---------------|--|----------|--|---------------|--|----------|--|---------------|--|----------|--|---------------|--|----------|--|---------------|--|----------|--|---------------|--|----------|--|---------------|--|----------|--|---------------|--|----------|--|---------------|--|----------|--|---------------|--|----------|--|---------------|--|----------|--|---------------|--|----------|--|---------------|--|----------|--|---------------|--|----------|--|---------------|--|----------|--|---------------|--|----------|--|---------------|--|----------|--|---------------|--|----------|--|---------------|--|----------|--|---------------|--|----------|--|---------------|--|----------|--|---------------|--|----------|--|---------------|--|----------|--|---------------|--|----------|--|---------------|--|----------|--|---------------|--|----------|--|---------------|--|----------|--|---------------|--|----------|--|---------------|--|----------|--|---------------|--|----------|--|---------------|--|----------|--|---------------|--|----------|--|---------------|--|----------|--|---------------|--|----------|--|---------------|--|----------|--|---------------|--|----------|--|---------------|--|----------|--|---------------|--|-----------|--|----------------|--|-----------|--|----------------|--|-----------|--|----------------|--|-----------|--|----------------|--|-----------|--|----------------|--|-----------|--|----------------|--|-----------|--|----------------|--|-----------|--|----------------|--|-----------|--|----------------|--|-----------|--|----------------|--|-----------|--|----------------|--|-----------|--|----------------|--|-----------|--|----------------|--|-----------|--|----------------|--|-----------|--|----------------|--|-----------|--|----------------|--|-----------|--|----------------|--|-----------|--|----------------|--|-----------|--|----------------|--|-----------|--|----------------|--|-----------|--|----------------|--|-----------|--|----------------|--|-----------|--|----------------|--|-----------|--|----------------|--|-----------|--|----------------|--|-----------|--|----------------|--|-----------|--|----------------|--|-----------|--|----------------|--|-----------|--|----------------|--|-----------|--|----------------|--|-----------|--|----------------|--|-----------|--|----------------|--|-----------|--|----------------|--|-----------|--|
|----------|--|---------------|--|----------|--|---------------|--|----------|--|---------------|--|----------|--|---------------|--|----------|--|---------------|--|----------|--|---------------|--|----------|--|---------------|--|----------|--|---------------|--|----------|--|---------------|--|----------|--|---------------|--|----------|--|---------------|--|----------|--|---------------|--|----------|--|---------------|--|----------|--|---------------|--|----------|--|---------------|--|----------|--|---------------|--|----------|--|---------------|--|----------|--|---------------|--|----------|--|---------------|--|----------|--|---------------|--|----------|--|---------------|--|----------|--|---------------|--|----------|--|---------------|--|----------|--|---------------|--|----------|--|---------------|--|----------|--|---------------|--|----------|--|---------------|--|----------|--|---------------|--|----------|--|---------------|--|----------|--|---------------|--|----------|--|---------------|--|----------|--|---------------|--|----------|--|---------------|--|----------|--|---------------|--|----------|--|---------------|--|----------|--|---------------|--|----------|--|---------------|--|----------|--|---------------|--|----------|--|---------------|--|----------|--|---------------|--|----------|--|---------------|--|----------|--|---------------|--|----------|--|---------------|--|----------|--|---------------|--|----------|--|---------------|--|----------|--|---------------|--|----------|--|---------------|--|----------|--|---------------|--|----------|--|---------------|--|----------|--|---------------|--|----------|--|---------------|--|----------|--|---------------|--|----------|--|---------------|--|----------|--|---------------|--|----------|--|---------------|--|----------|--|---------------|--|----------|--|---------------|--|----------|--|---------------|--|----------|--|---------------|--|----------|--|---------------|--|----------|--|---------------|--|----------|--|---------------|--|----------|--|---------------|--|----------|--|---------------|--|----------|--|---------------|--|----------|--|---------------|--|----------|--|---------------|--|----------|--|---------------|--|----------|--|---------------|--|----------|--|---------------|--|----------|--|---------------|--|----------|--|---------------|--|----------|--|---------------|--|----------|--|---------------|--|----------|--|---------------|--|----------|--|---------------|--|----------|--|---------------|--|----------|--|---------------|--|----------|--|---------------|--|----------|--|---------------|--|----------|--|---------------|--|----------|--|---------------|--|----------|--|---------------|--|----------|--|---------------|--|----------|--|---------------|--|----------|--|---------------|--|----------|--|---------------|--|----------|--|---------------|--|----------|--|---------------|--|----------|--|---------------|--|----------|--|---------------|--|----------|--|---------------|--|----------|--|---------------|--|----------|--|---------------|--|----------|--|---------------|--|----------|--|---------------|--|----------|--|---------------|--|----------|--|---------------|--|----------|--|---------------|--|----------|--|---------------|--|----------|--|---------------|--|----------|--|---------------|--|----------|--|---------------|--|----------|--|---------------|--|----------|--|---------------|--|----------|--|---------------|--|----------|--|---------------|--|----------|--|---------------|--|----------|--|---------------|--|----------|--|---------------|--|----------|--|---------------|--|----------|--|---------------|--|----------|--|---------------|--|----------|--|---------------|--|----------|--|---------------|--|----------|--|---------------|--|----------|--|---------------|--|----------|--|---------------|--|----------|--|---------------|--|----------|--|---------------|--|----------|--|---------------|--|----------|--|---------------|--|----------|--|---------------|--|----------|--|---------------|--|----------|--|---------------|--|----------|--|---------------|--|----------|--|---------------|--|----------|--|---------------|--|----------|--|---------------|--|----------|--|---------------|--|----------|--|---------------|--|----------|--|---------------|--|----------|--|---------------|--|----------|--|---------------|--|----------|--|---------------|--|----------|--|---------------|--|----------|--|---------------|--|----------|--|---------------|--|----------|--|---------------|--|----------|--|---------------|--|----------|--|---------------|--|----------|--|---------------|--|----------|--|---------------|--|----------|--|---------------|--|----------|--|---------------|--|----------|--|---------------|--|----------|--|---------------|--|----------|--|---------------|--|----------|--|---------------|--|----------|--|---------------|--|----------|--|---------------|--|----------|--|---------------|--|----------|--|---------------|--|----------|--|---------------|--|----------|--|---------------|--|----------|--|---------------|--|----------|--|---------------|--|----------|--|---------------|--|----------|--|---------------|--|----------|--|---------------|--|----------|--|---------------|--|----------|--|---------------|--|----------|--|---------------|--|----------|--|---------------|--|----------|--|---------------|--|----------|--|---------------|--|----------|--|---------------|--|----------|--|---------------|--|----------|--|---------------|--|----------|--|---------------|--|----------|--|---------------|--|----------|--|---------------|--|----------|--|---------------|--|----------|--|---------------|--|----------|--|---------------|--|----------|--|---------------|--|----------|--|---------------|--|----------|--|---------------|--|----------|--|---------------|--|----------|--|---------------|--|----------|--|---------------|--|----------|--|---------------|--|----------|--|---------------|--|----------|--|---------------|--|----------|--|---------------|--|----------|--|---------------|--|----------|--|---------------|--|----------|--|---------------|--|----------|--|---------------|--|----------|--|---------------|--|----------|--|---------------|--|----------|--|---------------|--|----------|--|---------------|--|----------|--|---------------|--|----------|--|---------------|--|----------|--|---------------|--|----------|--|---------------|--|----------|--|---------------|--|----------|--|---------------|--|----------|--|---------------|--|----------|--|---------------|--|----------|--|---------------|--|----------|--|---------------|--|----------|--|---------------|--|----------|--|---------------|--|----------|--|---------------|--|----------|--|---------------|--|----------|--|---------------|--|----------|--|---------------|--|----------|--|---------------|--|----------|--|---------------|--|----------|--|---------------|--|----------|--|---------------|--|----------|--|---------------|--|----------|--|---------------|--|----------|--|---------------|--|----------|--|---------------|--|----------|--|---------------|--|----------|--|---------------|--|----------|--|---------------|--|----------|--|---------------|--|----------|--|---------------|--|----------|--|---------------|--|----------|--|---------------|--|----------|--|---------------|--|----------|--|---------------|--|----------|--|---------------|--|----------|--|---------------|--|----------|--|---------------|--|----------|--|---------------|--|----------|--|---------------|--|----------|--|---------------|--|----------|--|---------------|--|----------|--|---------------|--|----------|--|---------------|--|----------|--|---------------|--|----------|--|---------------|--|----------|--|---------------|--|----------|--|---------------|--|----------|--|---------------|--|----------|--|---------------|--|----------|--|---------------|--|----------|--|---------------|--|----------|--|---------------|--|----------|--|---------------|--|----------|--|---------------|--|----------|--|---------------|--|----------|--|---------------|--|----------|--|---------------|--|----------|--|---------------|--|----------|--|---------------|--|----------|--|---------------|--|----------|--|---------------|--|----------|--|---------------|--|----------|--|---------------|--|----------|--|---------------|--|----------|--|---------------|--|----------|--|---------------|--|----------|--|---------------|--|----------|--|---------------|--|----------|--|---------------|--|----------|--|---------------|--|----------|--|---------------|--|----------|--|---------------|--|----------|--|---------------|--|----------|--|---------------|--|----------|--|---------------|--|----------|--|---------------|--|----------|--|---------------|--|----------|--|---------------|--|----------|--|---------------|--|----------|--|---------------|--|----------|--|---------------|--|----------|--|---------------|--|----------|--|---------------|--|----------|--|---------------|--|----------|--|---------------|--|----------|--|---------------|--|----------|--|---------------|--|----------|--|---------------|--|----------|--|---------------|--|----------|--|---------------|--|----------|--|---------------|--|----------|--|---------------|--|----------|--|---------------|--|----------|--|---------------|--|----------|--|---------------|--|----------|--|---------------|--|----------|--|---------------|--|----------|--|---------------|--|----------|--|---------------|--|----------|--|---------------|--|----------|--|---------------|--|----------|--|---------------|--|----------|--|---------------|--|----------|--|---------------|--|----------|--|---------------|--|----------|--|---------------|--|----------|--|---------------|--|----------|--|---------------|--|----------|--|---------------|--|----------|--|---------------|--|----------|--|---------------|--|----------|--|---------------|--|----------|--|---------------|--|----------|--|---------------|--|----------|--|---------------|--|----------|--|---------------|--|----------|--|---------------|--|----------|--|---------------|--|----------|--|---------------|--|----------|--|---------------|--|----------|--|---------------|--|----------|--|---------------|--|----------|--|---------------|--|----------|--|---------------|--|----------|--|---------------|--|----------|--|---------------|--|----------|--|---------------|--|----------|--|---------------|--|----------|--|---------------|--|----------|--|---------------|--|----------|--|---------------|--|----------|--|---------------|--|----------|--|---------------|--|----------|--|---------------|--|----------|--|---------------|--|----------|--|---------------|--|----------|--|---------------|--|----------|--|---------------|--|----------|--|---------------|--|----------|--|---------------|--|----------|--|---------------|--|----------|--|---------------|--|----------|--|---------------|--|----------|--|---------------|--|----------|--|---------------|--|----------|--|---------------|--|----------|--|---------------|--|----------|--|---------------|--|----------|--|---------------|--|----------|--|---------------|--|----------|--|---------------|--|----------|--|---------------|--|----------|--|---------------|--|----------|--|---------------|--|----------|--|---------------|--|----------|--|---------------|--|----------|--|---------------|--|----------|--|---------------|--|----------|--|---------------|--|----------|--|---------------|--|----------|--|---------------|--|----------|--|---------------|--|----------|--|---------------|--|----------|--|---------------|--|----------|--|---------------|--|----------|--|---------------|--|----------|--|---------------|--|----------|--|---------------|--|----------|--|---------------|--|----------|--|---------------|--|----------|--|---------------|--|----------|--|---------------|--|----------|--|---------------|--|----------|--|---------------|--|----------|--|---------------|--|----------|--|---------------|--|----------|--|---------------|--|----------|--|---------------|--|----------|--|---------------|--|----------|--|---------------|--|----------|--|---------------|--|----------|--|---------------|--|----------|--|---------------|--|----------|--|---------------|--|----------|--|---------------|--|----------|--|---------------|--|----------|--|---------------|--|----------|--|---------------|--|----------|--|---------------|--|----------|--|---------------|--|----------|--|---------------|--|----------|--|---------------|--|----------|--|---------------|--|----------|--|---------------|--|----------|--|---------------|--|----------|--|---------------|--|----------|--|---------------|--|----------|--|---------------|--|----------|--|---------------|--|----------|--|---------------|--|----------|--|---------------|--|----------|--|---------------|--|----------|--|---------------|--|----------|--|---------------|--|----------|--|---------------|--|----------|--|---------------|--|----------|--|---------------|--|----------|--|---------------|--|----------|--|---------------|--|----------|--|---------------|--|----------|--|---------------|--|----------|--|---------------|--|----------|--|---------------|--|----------|--|---------------|--|----------|--|---------------|--|----------|--|---------------|--|----------|--|---------------|--|----------|--|---------------|--|----------|--|---------------|--|----------|--|---------------|--|----------|--|---------------|--|----------|--|---------------|--|----------|--|---------------|--|----------|--|---------------|--|----------|--|---------------|--|----------|--|---------------|--|----------|--|---------------|--|----------|--|---------------|--|----------|--|---------------|--|----------|--|---------------|--|----------|--|---------------|--|----------|--|---------------|--|----------|--|---------------|--|----------|--|---------------|--|----------|--|---------------|--|----------|--|---------------|--|----------|--|---------------|--|----------|--|---------------|--|----------|--|---------------|--|----------|--|---------------|--|----------|--|---------------|--|----------|--|---------------|--|----------|--|---------------|--|----------|--|---------------|--|----------|--|---------------|--|----------|--|---------------|--|----------|--|---------------|--|----------|--|---------------|--|-----------|--|----------------|--|-----------|--|----------------|--|-----------|--|----------------|--|-----------|--|----------------|--|-----------|--|----------------|--|-----------|--|----------------|--|-----------|--|----------------|--|-----------|--|----------------|--|-----------|--|----------------|--|-----------|--|----------------|--|-----------|--|----------------|--|-----------|--|----------------|--|-----------|--|----------------|--|-----------|--|----------------|--|-----------|--|----------------|--|-----------|--|----------------|--|-----------|--|----------------|--|-----------|--|----------------|--|-----------|--|----------------|--|-----------|--|----------------|--|-----------|--|----------------|--|-----------|--|----------------|--|-----------|--|----------------|--|-----------|--|----------------|--|-----------|--|----------------|--|-----------|--|----------------|--|-----------|--|----------------|--|-----------|--|----------------|--|-----------|--|----------------|--|-----------|--|----------------|--|-----------|--|----------------|--|-----------|--|----------------|--|-----------|--|----------------|--|-----------|--|





File: ESM\_10 (Online Resource)

Title: Comparative Multidimensional Molecular Analyses of Pediatric Diffuse Intrinsic Glioma Reveals Distinct Molecular Subtypes

Author: Anna NeuroPathology

Authors: Ananya M. Sankar, Manish KumarBhatnagar, Konall Snyder, Sidick Yavuz, Joe Devenny,

Brennan Harmon, Jordan Hall, Eric H. Ruabe, Ping An, Melanie Weingart, Brian Reid, Sarah Magee, Roger J. Packer, Javad Nazarian

Corresponding Author:

Javad Nazarian, Children's National Medical Center, Center for Genetic Medicine,

111 Michigan Ave., NW, Washington DC, 20010

Phone: 202-476-6022 Fax: 202-476-6014

Email: J.Nazarian@CNMC.org

| value[106] |  | FoldChange[106] |  | value[107] |  | FoldChange[107] |  | value[108] |  | FoldChange[108] |  | value[109] |  | FoldChange[109] |  | value[110] |  | FoldChange[110] |  | value[111] |  | FoldChange[111] |  | value[112] |  | FoldChange[112] |  | value[113] |  | FoldChange[113] |  | value[114] |  | FoldChange[114] |  | value[115] |  | FoldChange[115] |  | value[116] |  | FoldChange[116] |  | value[117] |  | FoldChange[117] |  | value[118] |  | FoldChange[118] |  | value[119] |  | FoldChange[119] |  | value[120] |  | FoldChange[120] |  | value[121] |  | FoldChange[121] |  | value[122] |  | FoldChange[122] |  | value[123] |  | FoldChange[123] |  | value[124] |  | FoldChange[124] |  | value[125] |  | FoldChange[125] |  | value[126] |  | FoldChange[126] |  | value[127] |  | FoldChange[127] |  | value[128] |  | FoldChange[128] |  | value[129] |  | FoldChange[129] |  | value[130] |  | FoldChange[130] |  | value[131] |  | FoldChange[131] |  | value[132] |  | FoldChange[132] |  | value[133] |  | FoldChange[133] |  | value[134] |  | FoldChange[134] |  | value[135] |  | FoldChange[135] |  | value[136] |  | FoldChange[136] |  | value[137] |  | FoldChange[137] |  | value[138] |  | FoldChange[138] |  | value[139] |  | FoldChange[139] |  | value[140] |  | FoldChange[140] |  | value[141] |  | FoldChange[141] |  | value[142] |  | FoldChange[142] |  | value[143] |  | FoldChange[143] |  | value[144] |  | FoldChange[144] |  | value[145] |  | FoldChange[145] |  | value[146] |  | FoldChange[146] |  | value[147] |  | FoldChange[147] |  | value[148] |  | FoldChange[148] |  | value[149] |  | FoldChange[149] |  | value[150] |  | FoldChange[150] |  | value[151] |  | FoldChange[151] |  | value[152] |  | FoldChange[152] |  | value[153] |  | FoldChange[153] |  | value[154] |  | FoldChange[154] |  | value[155] |  | FoldChange[155] |  | value[156] |  | FoldChange[156] |  | value[157] |  | FoldChange[157] |  | value[158] |  | FoldChange[158] |  | value[159] |  | FoldChange[159] |  | value[160] |  | FoldChange[160] |  | value[161] |  | FoldChange[161] |  | value[162] |  | FoldChange[162] |  | value[163] |  | FoldChange[163] |  | value[164] |  | FoldChange[164] |  | value[165] |  | FoldChange[165] |  | value[166] |  | FoldChange[166] |  | value[167] |  | FoldChange[167] |  | value[168] |  | FoldChange[168] |  | value[169] |  | FoldChange[169] |  | value[170] |  | FoldChange[170] |  | value[171] |  | FoldChange[171] |  | value[172] |  | FoldChange[172] |  | value[173] |  | FoldChange[173] |  | value[174] |  | FoldChange[174] |  | value[175] |  | FoldChange[175] |  | value[176] |  | FoldChange[176] |  | value[177] |  | FoldChange[177] |  | value[178] |  | FoldChange[178] |  | value[179] |  | FoldChange[179] |  | value[180] |  | FoldChange[180] |  | value[181] |  | FoldChange[181] |  | value[182] |  | FoldChange[182] |  | value[183] |  | FoldChange[183] |  | value[184] |  | FoldChange[184] |  | value[185] |  | FoldChange[185] |  | value[186] |  | FoldChange[186] |  | value[187] |  | FoldChange[187] |  | value[188] |  | FoldChange[188] |  | value[189] |  | FoldChange[189] |  | value[190] |  | FoldChange[190] |  | value[191] |  | FoldChange[191] |  | value[192] |  | FoldChange[192] |  | value[193] |  | FoldChange[193] |  | value[194] |  | FoldChange[194] |  | value[195] |  | FoldChange[195] |  | value[196] |  | FoldChange[196] |  | value[197] |  | FoldChange[197] |  | value[198] |  | FoldChange[198] |  | value[199] |  | FoldChange[199] |  | value[200] |  | FoldChange[200] |  | value[201] |  | FoldChange[201] |  | value[202] |  | FoldChange[202] |  | value[203] |  | FoldChange[203] |  | value[204] |  | FoldChange[204] |  | value[205] |  | FoldChange[205] |  | value[206] |  | FoldChange[206] |  | value[207] |  | FoldChange[207] |  | value[208] |  | FoldChange[208] |  | value[209] |  | FoldChange[209] |  | value[210] |  | FoldChange[210] |  | value[211] |  | FoldChange[211] |  | value[212] |  | FoldChange[212] |  | value[213] |  | FoldChange[213] |  | value[214] |  | FoldChange[214] |  | value[215] |  | FoldChange[215] |  | value[216] |  | FoldChange[216] |  | value[217] |  | FoldChange[217] |  | value[218] |  | FoldChange[218] |  | value[219] |  | FoldChange[219] |  | value[220] |  | FoldChange[220] |  | value[221] |  | FoldChange[221] |  | value[222] |  | FoldChange[222] |  | value[223] |  | FoldChange[223] |  | value[224] |  | FoldChange[224] |  | value[225] |  | FoldChange[225] |  | value[226] |  | FoldChange[226] |  | value[227] |  | FoldChange[227] |  | value[228] |  | FoldChange[228] |  | value[229] |  | FoldChange[229] |  | value[230] |  | FoldChange[230] |  | value[231] |  | FoldChange[231] |  | value[232] |  | FoldChange[232] |  | value[233] |  | FoldChange[233] |  | value[234] |  | FoldChange[234] |  | value[235] |  | FoldChange[235] |  | value[236] |  | FoldChange[236] |  | value[237] |  | FoldChange[237] |  | value[238] |  | FoldChange[238] |  | value[239] |  | FoldChange[239] |  | value[240] |  | FoldChange[240] |  | value[241] |  | FoldChange[241] |  | value[242] |  | FoldChange[242] |  | value[243] |  | FoldChange[243] |  | value[244] |  | FoldChange[244] |  | value[245] |  | FoldChange[245] |  | value[246] |  | FoldChange[246] |  | value[247] |  | FoldChange[247] |  | value[248] |  | FoldChange[248] |  | value[249] |  | FoldChange[249] |  | value[250] |  | FoldChange[250] |  | value[251] |  | FoldChange[251] |  | value[252] |  | FoldChange[252] |  | value[253] |  | FoldChange[253] |  | value[254] |  | FoldChange[254] |  | value[255] |  | FoldChange[255] |  | value[256] |  | FoldChange[256] |  | value[257] |  | FoldChange[257] |  | value[258] |  | FoldChange[258] |  | value[259] |  | FoldChange[259] |  | value[260] |  | FoldChange[260] |  | value[261] |  | FoldChange[261] |  | value[262] |  | FoldChange[262] |  | value[263] |  | FoldChange[263] |  | value[264] |  | FoldChange[264] |  | value[265] |  | FoldChange[265] |  | value[266] |  | FoldChange[266] |  | value[267] |  | FoldChange[267] |  | value[268] |  | FoldChange[268] |  | value[269] |  | FoldChange[269] |  | value[270] |  | FoldChange[270] |  | value[271] |  | FoldChange[271] |  | value[272] |  | FoldChange[272] |  | value[273] |  | FoldChange[273] |  | value[274] |  | FoldChange[274] |  | value[275] |  | FoldChange[275] |  | value[276] |  | FoldChange[276] |  | value[277] |  | FoldChange[277] |  | value[278] |  | FoldChange[278] |  | value[279] |  | FoldChange[279] |  | value[280] |  | FoldChange[280] |  | value[281] |  | FoldChange[281] |  | value[282] |  | FoldChange[282] |  | value[283] |  | FoldChange[283] |  | value[284] |  | FoldChange[284] |  | value[285] |  | FoldChange[285] |  | value[286] |  | FoldChange[286] |  | value[287] |  | FoldChange[287] |  | value[288] |  | FoldChange[288] |  | value[289] |  | FoldChange[289] |  | value[290] |  | FoldChange[290] |  | value[291] |  | FoldChange[291] |  | value[292] |  | FoldChange[292] |  | value[293] |  | FoldChange[293] |  | value[294] |  | FoldChange[294] |  | value[295] |  | FoldChange[295] |  | value[296] |  | FoldChange[296] |  | value[297] |  | FoldChange[297] |  | value[298] |  | FoldChange[298] |  | value[299] |  | FoldChange[299] |  | value[300] |  | FoldChange[300] |  | value[301] |  | FoldChange[301] |  | value[302] |  | FoldChange[302] |  | value[303] |  | FoldChange[303] |  | value[304] |  | FoldChange[304] |  | value[305] |  | FoldChange[305] |  | value[306] |  | FoldChange[306] |  | value[307] |  | FoldChange[307] |  | value[308] |  | FoldChange[308] |  | value[309] |  | FoldChange[309] |  | value[310] |  | FoldChange[310] |  | value[311] |  | FoldChange[311] |  | value[312] |  | FoldChange[312] |  | value[313] |  | FoldChange[313] |  | value[314] |  | FoldChange[314] |  | value[315] |  | FoldChange[315] |  | value[316] |  | FoldChange[316] |  | value[317] |  | FoldChange[317] |  | value[318] |  | FoldChange[318] |  | value[319] |  | FoldChange[319] |  | value[320] |  | FoldChange[320] |  | value[321] |  | FoldChange[321] |  | value[322] |  | FoldChange[322] |  | value[323] |  | FoldChange[323] |  | value[324] |  | FoldChange[324] |  | value[325] |  | FoldChange[325] |  | value[326] |  | FoldChange[326] |  | value[327] |  | FoldChange[327] |  | value[328] |  | FoldChange[328] |  | value[329] |  | FoldChange[329] |  | value[330] |  | FoldChange[330] |  | value[331] |  | FoldChange[331] |  | value[332] |  | FoldChange[332] |  | value[333] |  | FoldChange[333] |  | value[334] |  | FoldChange[334] |  | value[335] |  | FoldChange[335] |  | value[336] |  | FoldChange[336] |  | value[337] |  | FoldChange[337] |  | value[338] |  | FoldChange[338] |  | value[339] |  | FoldChange[339] |  | value[340] |  | FoldChange[340] |  | value[341] |  | FoldChange[341] |  | value[342] |  | FoldChange[342] |  | value[343] |  | FoldChange[343] |  | value[344] |  | FoldChange[344] |  | value[345] |  | FoldChange[345] |  | value[346] |  | FoldChange[346] |  | value[347] |  | FoldChange[347] |  | value[348] |  | FoldChange[348] |  | value[349] |  | FoldChange[349] |  | value[350] |  | FoldChange[350] |  | value[351] |  | FoldChange[351] |  | value[352] |  | FoldChange[352] |  | value[353] |  | FoldChange[353] |  | value[354] |  | FoldChange[354] |  | value[355] |  | FoldChange[355] |  | value[356] |  | FoldChange[356] |  | value[357] |  | FoldChange[357] |  | value[358] |  | FoldChange[358] |  | value[359] |  | FoldChange[359] |  | value[360] |  | FoldChange[360] |  | value[361] |  | FoldChange[361] |  | value[362] |  | FoldChange[362] |  | value[363] |  | FoldChange[363] |  | value[364] |  | FoldChange[364] |  | value[365] |  | FoldChange[365] |  | value[366] |  | FoldChange[366] |  | value[367] |  | FoldChange[367] |  | value[368] |  | FoldChange[368] |  | value[369] |  | FoldChange[369] |  | value[370] |  | FoldChange[370] |  | value[371] |  | FoldChange[371] |  | value[372] |  | FoldChange[372] |  | value[373] |  | FoldChange[373] |  | value[374] |  | FoldChange[374] |  | value[375] |  | FoldChange[375] |  | value[376] |  | FoldChange[376] |  | value[377] |  | FoldChange[377] |  | value[378] |  | FoldChange[378] |  | value[379] |  | FoldChange[379] |  | value[380] |  | FoldChange[380] |  | value[381] |  | FoldChange[381] |  | value[382] |  | FoldChange[382] |  | value[383] |  | FoldChange[383] |  | value[384] |  | FoldChange[384] |  | value[385] |  | FoldChange[385] |  | value[386] |  | FoldChange[386] |  | value[387] |  | FoldChange[387] |  | value[388] |  | FoldChange[388] |  | value[389] |  | FoldChange[389] |  | value[390] |  | FoldChange[390] |  | value[391] |  | FoldChange[391] |  | value[392] |  | FoldChange[392] |  | value[393] |  | FoldChange[393] |  | value[394] |  | FoldChange[394] |  | value[395] |  | FoldChange[395] |  | value[396] |  | FoldChange[396] |  | value[397] |  | FoldChange[397] |  | value[398] |  | FoldChange[398] |  | value[399] |  | FoldChange[399] |  | value[400] |  | FoldChange[400] |  | value[401] |  | FoldChange[401] |  | value[402] |  | FoldChange[402] |  | value[403] |  | FoldChange[403] |  | value[404] |  | FoldChange[404] |  | value[405] |  | FoldChange[405] |  | value[406] |  | FoldChange[406] |  | value[407] |  | FoldChange[407] |  | value[408] |  | FoldChange[408] |  | value[409] |  | FoldChange[409] |  | value[410] |  | FoldChange[410] |  | value[411] |  | FoldChange[411] |  | value[412] |  | FoldChange[412] |  | value[413] |  | FoldChange[413] |  | value[414] |  | FoldChange[414] |  | value[415] |  | FoldChange[415] |  | value[416] |  | FoldChange[416] |  | value[417] |  | FoldChange[417] |  | value[418] |  | FoldChange[418] |  | value[419] |  | FoldChange[419] |  | value[420] |  | FoldChange[420] |  | value[421] |  | FoldChange[421] |  | value[422] |  | FoldChange[422] |  | value[423] |  | FoldChange[423] |  | value[424] |  | FoldChange[424] |  | value[425] |  | FoldChange[425] |  | value[426] |  | FoldChange[426] |  | value[427] |  | FoldChange[427] |  | value[428] |  | FoldChange[428] |  | value[429] |  | FoldChange[429] |  | value[430] |  | FoldChange[430] |  | value[431] |  | FoldChange[431] |  | value[432] |  | FoldChange[432] |  | value[433] |  | FoldChange[433] |  | value[434] |  | FoldChange[434] |  | value[435] |  | FoldChange[435] |  | value[436] |  | FoldChange[436] |  | value[437] |  | FoldChange[437] |  | value[438] |  | FoldChange[438] |  | value[439] |  | FoldChange[439] |  | value[440] |  | FoldChange[440] |  | value[441] |  | FoldChange[441] |  | value[442] |  | FoldChange[442] |  | value[443] |  | FoldChange[443] |  | value[444] |  | FoldChange[444] |  | value[445] |  | FoldChange[445] |  | value[446] |  | FoldChange[446] |  | value[447] |  | FoldChange[447] |  | value[448] |  | FoldChange[448] |  | value[449] |  | FoldChange[449] |  | value[450] |  | FoldChange[450] |  | value[451] |  | FoldChange[451] |  | value[452] |  | FoldChange[452] |  | value[453] |  | FoldChange[453] |  | value[454] |  | FoldChange[454] |  | value[455] |  | FoldChange[455] |  | value[456] |  | FoldChange[456] |  | value[457] |  | FoldChange[457] |  | value[458] |  | FoldChange[458] |  | value[459] |  | FoldChange[459] |  | value[460] |  | FoldChange[460] |  | value[461] |  | FoldChange[461] |  | value[462] |  | FoldChange[462] |  | value[463] |  | FoldChange[463] |  | value[464] |  | FoldChange[464] |  | value[465] |  | FoldChange[465] |  | value[466] |  | FoldChange[466] |  | value[467] |  | FoldChange[467] |  | value[468] |  | FoldChange[468] |  | value[469] |  | FoldChange[469] |  | value[470] |  | FoldChange[470] |  | value[471] |  | FoldChange[471] |  | value[472] |  | FoldChange[472] |  | value[473] |  | FoldChange[473] |  | value[474] |  | FoldChange[474] |  | value[475] |  | FoldChange[475] |  | value[476] |  | FoldChange[476] |  | value[477] |  | FoldChange[477] |  | value[478] |  | FoldChange[478] |  | value[479] |  | FoldChange[479] |  | value[480] |  | FoldChange[480] |  | value[481] |  | FoldChange[481] |  | value[482] |  | FoldChange[482] |  | value[483] |  | FoldChange[483] |  | value[484] |  | FoldChange[484] |  | value[485] |  | FoldChange[485] |  | value[486] |  | FoldChange[486] |  | value[487] |  | FoldChange[487] |  | value[488] |  | FoldChange[488] |  | value[489] |  | FoldChange[489] |  | value[490] |  | FoldChange[490] |  | value[491] |  | FoldChange[491] |  | value[492] |  | FoldChange[492] |  | value[493] |  | FoldChange[493] |  | value[494] |  | FoldChange[494] |  | value[495] |  | FoldChange[495] |  | value[496] |  | FoldChange[496] |  | value[497] |  | FoldChange[497] |  | value[498] |  | FoldChange[498] |  | value[499] |  | FoldChange[499] |  | value[500] |  | FoldChange[500] |  | value[501] |  | FoldChange[501] |  | value[502] |  | FoldChange[502] |  | value[503] |  | FoldChange[503] |  | value[504] |  | FoldChange[504] |  | value[505] |  | FoldChange[505] |  | value[506] |  | FoldChange[506] |  | value[507] |  | FoldChange[507] |  | value[508] |  | FoldChange[508] |  | value[509] |  | FoldChange[509] |  | value[510] |  | FoldChange[510] |  | value[511] |  | FoldChange[511] |  | value[512] |  | FoldChange[512] |  | value[513] |  | FoldChange[513] |  | value[514] |  | FoldChange[514] |  | value[515] |  | FoldChange[515] |  | value[516] |  | FoldChange[516] |  | value[517] |  | FoldChange[517] |  | value[518] |  | FoldChange[518] |  | value[519] |  | FoldChange[519] |  | value[520] |  | FoldChange[520] |  | value[521] |  | FoldChange[521] |  | value[522] |  | FoldChange[522] |  | value[523] |  | FoldChange[523] |  | value[524] |  | FoldChange[524] |  | value[525] |  | FoldChange[525] |  | value[526] |  | FoldChange[526] |  | value[527] |  | FoldChange[527] |  | value[528] |  | FoldChange[528] |  | value[529] |  | FoldChange[529] |  | value[530] |  | FoldChange[530] |  | value[531] |  | FoldChange[531] |  | value[532] |  | FoldChange[532] |  | value[533] |  | FoldChange[533] |  | value[534] |  | FoldChange[534] |  | value[535] |  | FoldChange[535] |  | value[536] |  | FoldChange[536] |  | value[537] |  | FoldChange[537] |  | value[538] |  | FoldChange[538] |  | value[539] |  | FoldChange[539] |  | value[540] |  | FoldChange[540] |  | value[541] |  | FoldChange[541] |  | value[542] |  | FoldChange[542] |  | value[543] |  | FoldChange[543] |  | value[544] |  | FoldChange[544] |  | value[545] |  | FoldChange[545] |  | value[546] |  | FoldChange[546] |  | value[547] |  | FoldChange[547] |  | value[548] |  | FoldChange[548] |  | value[549] |  | FoldChange[549] |  | value[550] |  | FoldChange[550] |  | value[551] |  | FoldChange[551] |  | value[552] |  | FoldChange[552] |  | value[553] |  | FoldChange[553] |  | value[554] |  | FoldChange[554] |  | value[555] |  | FoldChange[555] |  | value[556] |  | FoldChange[556] |  | value[557] |  | FoldChange[557] |  | value[558] |  | FoldChange[558] |  | value[559] |  | FoldChange[559] |  | value[560] |  | FoldChange[560] |  | value[561] |  | FoldChange[561] |  | value[562] |  | FoldChange[562] |  | value[563] |  | FoldChange[563] |  | value[564] |  |
|------------|--|-----------------|--|------------|--|-----------------|--|------------|--|-----------------|--|------------|--|-----------------|--|------------|--|-----------------|--|------------|--|-----------------|--|------------|--|-----------------|--|------------|--|-----------------|--|------------|--|-----------------|--|------------|--|-----------------|--|------------|--|-----------------|--|------------|--|-----------------|--|------------|--|-----------------|--|------------|--|-----------------|--|------------|--|-----------------|--|------------|--|-----------------|--|------------|--|-----------------|--|------------|--|-----------------|--|------------|--|-----------------|--|------------|--|-----------------|--|------------|--|-----------------|--|------------|--|-----------------|--|------------|--|-----------------|--|------------|--|-----------------|--|------------|--|-----------------|--|------------|--|-----------------|--|------------|--|-----------------|--|------------|--|-----------------|--|------------|--|-----------------|--|------------|--|-----------------|--|------------|--|-----------------|--|------------|--|-----------------|--|------------|--|-----------------|--|------------|--|-----------------|--|------------|--|-----------------|--|------------|--|-----------------|--|------------|--|-----------------|--|------------|--|-----------------|--|------------|--|-----------------|--|------------|--|-----------------|--|------------|--|-----------------|--|------------|--|-----------------|--|------------|--|-----------------|--|------------|--|-----------------|--|------------|--|-----------------|--|------------|--|-----------------|--|------------|--|-----------------|--|------------|--|-----------------|--|------------|--|-----------------|--|------------|--|-----------------|--|------------|--|-----------------|--|------------|--|-----------------|--|------------|--|-----------------|--|------------|--|-----------------|--|------------|--|-----------------|--|------------|--|-----------------|--|------------|--|-----------------|--|------------|--|-----------------|--|------------|--|-----------------|--|------------|--|-----------------|--|------------|--|-----------------|--|------------|--|-----------------|--|------------|--|-----------------|--|------------|--|-----------------|--|------------|--|-----------------|--|------------|--|-----------------|--|------------|--|-----------------|--|------------|--|-----------------|--|------------|--|-----------------|--|------------|--|-----------------|--|------------|--|-----------------|--|------------|--|-----------------|--|------------|--|-----------------|--|------------|--|-----------------|--|------------|--|-----------------|--|------------|--|-----------------|--|------------|--|-----------------|--|------------|--|-----------------|--|------------|--|-----------------|--|------------|--|-----------------|--|------------|--|-----------------|--|------------|--|-----------------|--|------------|--|-----------------|--|------------|--|-----------------|--|------------|--|-----------------|--|------------|--|-----------------|--|------------|--|-----------------|--|------------|--|-----------------|--|------------|--|-----------------|--|------------|--|-----------------|--|------------|--|-----------------|--|------------|--|-----------------|--|------------|--|-----------------|--|------------|--|-----------------|--|------------|--|-----------------|--|------------|--|-----------------|--|------------|--|-----------------|--|------------|--|-----------------|--|------------|--|-----------------|--|------------|--|-----------------|--|------------|--|-----------------|--|------------|--|-----------------|--|------------|--|-----------------|--|------------|--|-----------------|--|------------|--|-----------------|--|------------|--|-----------------|--|------------|--|-----------------|--|------------|--|-----------------|--|------------|--|-----------------|--|------------|--|-----------------|--|------------|--|-----------------|--|------------|--|-----------------|--|------------|--|-----------------|--|------------|--|-----------------|--|------------|--|-----------------|--|------------|--|-----------------|--|------------|--|-----------------|--|------------|--|-----------------|--|------------|--|-----------------|--|------------|--|-----------------|--|------------|--|-----------------|--|------------|--|-----------------|--|------------|--|-----------------|--|------------|--|-----------------|--|------------|--|-----------------|--|------------|--|-----------------|--|------------|--|-----------------|--|------------|--|-----------------|--|------------|--|-----------------|--|------------|--|-----------------|--|------------|--|-----------------|--|------------|--|-----------------|--|------------|--|-----------------|--|------------|--|-----------------|--|------------|--|-----------------|--|------------|--|-----------------|--|------------|--|-----------------|--|------------|--|-----------------|--|------------|--|-----------------|--|------------|--|-----------------|--|------------|--|-----------------|--|------------|--|-----------------|--|------------|--|-----------------|--|------------|--|-----------------|--|------------|--|-----------------|--|------------|--|-----------------|--|------------|--|-----------------|--|------------|--|-----------------|--|------------|--|-----------------|--|------------|--|-----------------|--|------------|--|-----------------|--|------------|--|-----------------|--|------------|--|-----------------|--|------------|--|-----------------|--|------------|--|-----------------|--|------------|--|-----------------|--|------------|--|-----------------|--|------------|--|-----------------|--|------------|--|-----------------|--|------------|--|-----------------|--|------------|--|-----------------|--|------------|--|-----------------|--|------------|--|-----------------|--|------------|--|-----------------|--|------------|--|-----------------|--|------------|--|-----------------|--|------------|--|-----------------|--|------------|--|-----------------|--|------------|--|-----------------|--|------------|--|-----------------|--|------------|--|-----------------|--|------------|--|-----------------|--|------------|--|-----------------|--|------------|--|-----------------|--|------------|--|-----------------|--|------------|--|-----------------|--|------------|--|-----------------|--|------------|--|-----------------|--|------------|--|-----------------|--|------------|--|-----------------|--|------------|--|-----------------|--|------------|--|-----------------|--|------------|--|-----------------|--|------------|--|-----------------|--|------------|--|-----------------|--|------------|--|-----------------|--|------------|--|-----------------|--|------------|--|-----------------|--|------------|--|-----------------|--|------------|--|-----------------|--|------------|--|-----------------|--|------------|--|-----------------|--|------------|--|-----------------|--|------------|--|-----------------|--|------------|--|-----------------|--|------------|--|-----------------|--|------------|--|-----------------|--|------------|--|-----------------|--|------------|--|-----------------|--|------------|--|-----------------|--|------------|--|-----------------|--|------------|--|-----------------|--|------------|--|-----------------|--|------------|--|-----------------|--|------------|--|-----------------|--|------------|--|-----------------|--|------------|--|-----------------|--|------------|--|-----------------|--|------------|--|-----------------|--|------------|--|-----------------|--|------------|--|-----------------|--|------------|--|-----------------|--|------------|--|-----------------|--|------------|--|-----------------|--|------------|--|-----------------|--|------------|--|-----------------|--|------------|--|-----------------|--|------------|--|-----------------|--|------------|--|-----------------|--|------------|--|-----------------|--|------------|--|-----------------|--|------------|--|-----------------|--|------------|--|-----------------|--|------------|--|-----------------|--|------------|--|-----------------|--|------------|--|-----------------|--|------------|--|-----------------|--|------------|--|-----------------|--|------------|--|-----------------|--|------------|--|-----------------|--|------------|--|-----------------|--|------------|--|-----------------|--|------------|--|-----------------|--|------------|--|-----------------|--|------------|--|-----------------|--|------------|--|-----------------|--|------------|--|-----------------|--|------------|--|-----------------|--|------------|--|-----------------|--|------------|--|-----------------|--|------------|--|-----------------|--|------------|--|-----------------|--|------------|--|-----------------|--|------------|--|-----------------|--|------------|--|-----------------|--|------------|--|-----------------|--|------------|--|-----------------|--|------------|--|-----------------|--|------------|--|-----------------|--|------------|--|-----------------|--|------------|--|-----------------|--|------------|--|-----------------|--|------------|--|-----------------|--|------------|--|-----------------|--|------------|--|-----------------|--|------------|--|-----------------|--|------------|--|-----------------|--|------------|--|-----------------|--|------------|--|-----------------|--|------------|--|-----------------|--|------------|--|-----------------|--|------------|--|-----------------|--|------------|--|-----------------|--|------------|--|-----------------|--|------------|--|-----------------|--|------------|--|-----------------|--|------------|--|-----------------|--|------------|--|-----------------|--|------------|--|-----------------|--|------------|--|-----------------|--|------------|--|-----------------|--|------------|--|-----------------|--|------------|--|-----------------|--|------------|--|-----------------|--|------------|--|-----------------|--|------------|--|-----------------|--|------------|--|-----------------|--|------------|--|-----------------|--|------------|--|-----------------|--|------------|--|-----------------|--|------------|--|-----------------|--|------------|--|-----------------|--|------------|--|-----------------|--|------------|--|-----------------|--|------------|--|-----------------|--|------------|--|-----------------|--|------------|--|-----------------|--|------------|--|-----------------|--|------------|--|-----------------|--|------------|--|-----------------|--|------------|--|-----------------|--|------------|--|-----------------|--|------------|--|-----------------|--|------------|--|-----------------|--|------------|--|-----------------|--|------------|--|-----------------|--|------------|--|-----------------|--|------------|--|-----------------|--|------------|--|-----------------|--|------------|--|-----------------|--|------------|--|-----------------|--|------------|--|-----------------|--|------------|--|-----------------|--|------------|--|-----------------|--|------------|--|-----------------|--|------------|--|-----------------|--|------------|--|-----------------|--|------------|--|-----------------|--|------------|--|-----------------|--|------------|--|-----------------|--|------------|--|-----------------|--|------------|--|-----------------|--|------------|--|-----------------|--|------------|--|-----------------|--|------------|--|-----------------|--|------------|--|-----------------|--|------------|--|-----------------|--|------------|--|-----------------|--|------------|--|-----------------|--|------------|--|-----------------|--|------------|--|-----------------|--|------------|--|-----------------|--|------------|--|-----------------|--|------------|--|-----------------|--|------------|--|-----------------|--|------------|--|-----------------|--|------------|--|-----------------|--|------------|--|-----------------|--|------------|--|-----------------|--|------------|--|-----------------|--|------------|--|-----------------|--|------------|--|-----------------|--|------------|--|-----------------|--|------------|--|-----------------|--|------------|--|-----------------|--|------------|--|-----------------|--|------------|--|-----------------|--|------------|--|-----------------|--|------------|--|-----------------|--|------------|--|-----------------|--|------------|--|-----------------|--|------------|--|-----------------|--|------------|--|-----------------|--|------------|--|-----------------|--|------------|--|-----------------|--|------------|--|-----------------|--|------------|--|-----------------|--|------------|--|-----------------|--|------------|--|-----------------|--|------------|--|-----------------|--|------------|--|-----------------|--|------------|--|-----------------|--|------------|--|-----------------|--|------------|--|-----------------|--|------------|--|-----------------|--|------------|--|-----------------|--|------------|--|-----------------|--|------------|--|-----------------|--|------------|--|-----------------|--|------------|--|-----------------|--|------------|--|-----------------|--|------------|--|-----------------|--|------------|--|-----------------|--|------------|--|-----------------|--|------------|--|-----------------|--|------------|--|-----------------|--|------------|--|-----------------|--|------------|--|-----------------|--|------------|--|-----------------|--|------------|--|-----------------|--|------------|--|-----------------|--|------------|--|-----------------|--|------------|--|-----------------|--|------------|--|-----------------|--|------------|--|-----------------|--|------------|--|-----------------|--|------------|--|-----------------|--|------------|--|-----------------|--|------------|--|-----------------|--|------------|--|-----------------|--|------------|--|-----------------|--|------------|--|-----------------|--|------------|--|-----------------|--|------------|--|-----------------|--|------------|--|-----------------|--|------------|--|-----------------|--|------------|--|-----------------|--|------------|--|-----------------|--|------------|--|-----------------|--|------------|--|-----------------|--|------------|--|-----------------|--|------------|--|-----------------|--|------------|--|-----------------|--|------------|--|-----------------|--|------------|--|-----------------|--|------------|--|-----------------|--|------------|--|-----------------|--|------------|--|-----------------|--|------------|--|-----------------|--|------------|--|-----------------|--|------------|--|-----------------|--|------------|--|-----------------|--|------------|--|-----------------|--|------------|--|-----------------|--|------------|--|-----------------|--|------------|--|-----------------|--|------------|--|-----------------|--|------------|--|-----------------|--|------------|--|-----------------|--|------------|--|-----------------|--|------------|--|-----------------|--|------------|--|-----------------|--|------------|--|-----------------|--|------------|--|-----------------|--|------------|--|-----------------|--|------------|--|-----------------|--|------------|--|-----------------|--|------------|--|-----------------|--|------------|--|-----------------|--|------------|--|-----------------|--|------------|--|-----------------|--|------------|--|-----------------|--|------------|--|-----------------|--|------------|--|-----------------|--|------------|--|-----------------|--|------------|--|-----------------|--|------------|--|-----------------|--|------------|--|-----------------|--|------------|--|-----------------|--|------------|--|-----------------|--|------------|--|-----------------|--|------------|--|-----------------|--|------------|--|-----------------|--|------------|--|-----------------|--|------------|--|-----------------|--|------------|--|-----------------|--|------------|--|-----------------|--|------------|--|-----------------|--|------------|--|-----------------|--|------------|--|-----------------|--|------------|--|-----------------|--|------------|--|-----------------|--|------------|--|-----------------|--|------------|--|-----------------|--|------------|--|-----------------|--|------------|--|-----------------|--|------------|--|-----------------|--|------------|--|-----------------|--|------------|--|-----------------|--|------------|--|-----------------|--|------------|--|-----------------|--|------------|--|-----------------|--|------------|--|-----------------|--|------------|--|-----------------|--|------------|--|-----------------|--|------------|--|-----------------|--|------------|--|-----------------|--|------------|--|-----------------|--|------------|--|
|------------|--|-----------------|--|------------|--|-----------------|--|------------|--|-----------------|--|------------|--|-----------------|--|------------|--|-----------------|--|------------|--|-----------------|--|------------|--|-----------------|--|------------|--|-----------------|--|------------|--|-----------------|--|------------|--|-----------------|--|------------|--|-----------------|--|------------|--|-----------------|--|------------|--|-----------------|--|------------|--|-----------------|--|------------|--|-----------------|--|------------|--|-----------------|--|------------|--|-----------------|--|------------|--|-----------------|--|------------|--|-----------------|--|------------|--|-----------------|--|------------|--|-----------------|--|------------|--|-----------------|--|------------|--|-----------------|--|------------|--|-----------------|--|------------|--|-----------------|--|------------|--|-----------------|--|------------|--|-----------------|--|------------|--|-----------------|--|------------|--|-----------------|--|------------|--|-----------------|--|------------|--|-----------------|--|------------|--|-----------------|--|------------|--|-----------------|--|------------|--|-----------------|--|------------|--|-----------------|--|------------|--|-----------------|--|------------|--|-----------------|--|------------|--|-----------------|--|------------|--|-----------------|--|------------|--|-----------------|--|------------|--|-----------------|--|------------|--|-----------------|--|------------|--|-----------------|--|------------|--|-----------------|--|------------|--|-----------------|--|------------|--|-----------------|--|------------|--|-----------------|--|------------|--|-----------------|--|------------|--|-----------------|--|------------|--|-----------------|--|------------|--|-----------------|--|------------|--|-----------------|--|------------|--|-----------------|--|------------|--|-----------------|--|------------|--|-----------------|--|------------|--|-----------------|--|------------|--|-----------------|--|------------|--|-----------------|--|------------|--|-----------------|--|------------|--|-----------------|--|------------|--|-----------------|--|------------|--|-----------------|--|------------|--|-----------------|--|------------|--|-----------------|--|------------|--|-----------------|--|------------|--|-----------------|--|------------|--|-----------------|--|------------|--|-----------------|--|------------|--|-----------------|--|------------|--|-----------------|--|------------|--|-----------------|--|------------|--|-----------------|--|------------|--|-----------------|--|------------|--|-----------------|--|------------|--|-----------------|--|------------|--|-----------------|--|------------|--|-----------------|--|------------|--|-----------------|--|------------|--|-----------------|--|------------|--|-----------------|--|------------|--|-----------------|--|------------|--|-----------------|--|------------|--|-----------------|--|------------|--|-----------------|--|------------|--|-----------------|--|------------|--|-----------------|--|------------|--|-----------------|--|------------|--|-----------------|--|------------|--|-----------------|--|------------|--|-----------------|--|------------|--|-----------------|--|------------|--|-----------------|--|------------|--|-----------------|--|------------|--|-----------------|--|------------|--|-----------------|--|------------|--|-----------------|--|------------|--|-----------------|--|------------|--|-----------------|--|------------|--|-----------------|--|------------|--|-----------------|--|------------|--|-----------------|--|------------|--|-----------------|--|------------|--|-----------------|--|------------|--|-----------------|--|------------|--|-----------------|--|------------|--|-----------------|--|------------|--|-----------------|--|------------|--|-----------------|--|------------|--|-----------------|--|------------|--|-----------------|--|------------|--|-----------------|--|------------|--|-----------------|--|------------|--|-----------------|--|------------|--|-----------------|--|------------|--|-----------------|--|------------|--|-----------------|--|------------|--|-----------------|--|------------|--|-----------------|--|------------|--|-----------------|--|------------|--|-----------------|--|------------|--|-----------------|--|------------|--|-----------------|--|------------|--|-----------------|--|------------|--|-----------------|--|------------|--|-----------------|--|------------|--|-----------------|--|------------|--|-----------------|--|------------|--|-----------------|--|------------|--|-----------------|--|------------|--|-----------------|--|------------|--|-----------------|--|------------|--|-----------------|--|------------|--|-----------------|--|------------|--|-----------------|--|------------|--|-----------------|--|------------|--|-----------------|--|------------|--|-----------------|--|------------|--|-----------------|--|------------|--|-----------------|--|------------|--|-----------------|--|------------|--|-----------------|--|------------|--|-----------------|--|------------|--|-----------------|--|------------|--|-----------------|--|------------|--|-----------------|--|------------|--|-----------------|--|------------|--|-----------------|--|------------|--|-----------------|--|------------|--|-----------------|--|------------|--|-----------------|--|------------|--|-----------------|--|------------|--|-----------------|--|------------|--|-----------------|--|------------|--|-----------------|--|------------|--|-----------------|--|------------|--|-----------------|--|------------|--|-----------------|--|------------|--|-----------------|--|------------|--|-----------------|--|------------|--|-----------------|--|------------|--|-----------------|--|------------|--|-----------------|--|------------|--|-----------------|--|------------|--|-----------------|--|------------|--|-----------------|--|------------|--|-----------------|--|------------|--|-----------------|--|------------|--|-----------------|--|------------|--|-----------------|--|------------|--|-----------------|--|------------|--|-----------------|--|------------|--|-----------------|--|------------|--|-----------------|--|------------|--|-----------------|--|------------|--|-----------------|--|------------|--|-----------------|--|------------|--|-----------------|--|------------|--|-----------------|--|------------|--|-----------------|--|------------|--|-----------------|--|------------|--|-----------------|--|------------|--|-----------------|--|------------|--|-----------------|--|------------|--|-----------------|--|------------|--|-----------------|--|------------|--|-----------------|--|------------|--|-----------------|--|------------|--|-----------------|--|------------|--|-----------------|--|------------|--|-----------------|--|------------|--|-----------------|--|------------|--|-----------------|--|------------|--|-----------------|--|------------|--|-----------------|--|------------|--|-----------------|--|------------|--|-----------------|--|------------|--|-----------------|--|------------|--|-----------------|--|------------|--|-----------------|--|------------|--|-----------------|--|------------|--|-----------------|--|------------|--|-----------------|--|------------|--|-----------------|--|------------|--|-----------------|--|------------|--|-----------------|--|------------|--|-----------------|--|------------|--|-----------------|--|------------|--|-----------------|--|------------|--|-----------------|--|------------|--|-----------------|--|------------|--|-----------------|--|------------|--|-----------------|--|------------|--|-----------------|--|------------|--|-----------------|--|------------|--|-----------------|--|------------|--|-----------------|--|------------|--|-----------------|--|------------|--|-----------------|--|------------|--|-----------------|--|------------|--|-----------------|--|------------|--|-----------------|--|------------|--|-----------------|--|------------|--|-----------------|--|------------|--|-----------------|--|------------|--|-----------------|--|------------|--|-----------------|--|------------|--|-----------------|--|------------|--|-----------------|--|------------|--|-----------------|--|------------|--|-----------------|--|------------|--|-----------------|--|------------|--|-----------------|--|------------|--|-----------------|--|------------|--|-----------------|--|------------|--|-----------------|--|------------|--|-----------------|--|------------|--|-----------------|--|------------|--|-----------------|--|------------|--|-----------------|--|------------|--|-----------------|--|------------|--|-----------------|--|------------|--|-----------------|--|------------|--|-----------------|--|------------|--|-----------------|--|------------|--|-----------------|--|------------|--|-----------------|--|------------|--|-----------------|--|------------|--|-----------------|--|------------|--|-----------------|--|------------|--|-----------------|--|------------|--|-----------------|--|------------|--|-----------------|--|------------|--|-----------------|--|------------|--|-----------------|--|------------|--|-----------------|--|------------|--|-----------------|--|------------|--|-----------------|--|------------|--|-----------------|--|------------|--|-----------------|--|------------|--|-----------------|--|------------|--|-----------------|--|------------|--|-----------------|--|------------|--|-----------------|--|------------|--|-----------------|--|------------|--|-----------------|--|------------|--|-----------------|--|------------|--|-----------------|--|------------|--|-----------------|--|------------|--|-----------------|--|------------|--|-----------------|--|------------|--|-----------------|--|------------|--|-----------------|--|------------|--|-----------------|--|------------|--|-----------------|--|------------|--|-----------------|--|------------|--|-----------------|--|------------|--|-----------------|--|------------|--|-----------------|--|------------|--|-----------------|--|------------|--|-----------------|--|------------|--|-----------------|--|------------|--|-----------------|--|------------|--|-----------------|--|------------|--|-----------------|--|------------|--|-----------------|--|------------|--|-----------------|--|------------|--|-----------------|--|------------|--|-----------------|--|------------|--|-----------------|--|------------|--|-----------------|--|------------|--|-----------------|--|------------|--|-----------------|--|------------|--|-----------------|--|------------|--|-----------------|--|------------|--|-----------------|--|------------|--|-----------------|--|------------|--|-----------------|--|------------|--|-----------------|--|------------|--|-----------------|--|------------|--|-----------------|--|------------|--|-----------------|--|------------|--|-----------------|--|------------|--|-----------------|--|------------|--|-----------------|--|------------|--|-----------------|--|------------|--|-----------------|--|------------|--|-----------------|--|------------|--|-----------------|--|------------|--|-----------------|--|------------|--|-----------------|--|------------|--|-----------------|--|------------|--|-----------------|--|------------|--|-----------------|--|------------|--|-----------------|--|------------|--|-----------------|--|------------|--|-----------------|--|------------|--|-----------------|--|------------|--|-----------------|--|------------|--|-----------------|--|------------|--|-----------------|--|------------|--|-----------------|--|------------|--|-----------------|--|------------|--|-----------------|--|------------|--|-----------------|--|------------|--|-----------------|--|------------|--|-----------------|--|------------|--|-----------------|--|------------|--|-----------------|--|------------|--|-----------------|--|------------|--|-----------------|--|------------|--|-----------------|--|------------|--|-----------------|--|------------|--|-----------------|--|------------|--|-----------------|--|------------|--|-----------------|--|------------|--|-----------------|--|------------|--|-----------------|--|------------|--|-----------------|--|------------|--|-----------------|--|------------|--|-----------------|--|------------|--|-----------------|--|------------|--|-----------------|--|------------|--|-----------------|--|------------|--|-----------------|--|------------|--|-----------------|--|------------|--|-----------------|--|------------|--|-----------------|--|------------|--|-----------------|--|------------|--|-----------------|--|------------|--|-----------------|--|------------|--|-----------------|--|------------|--|-----------------|--|------------|--|-----------------|--|------------|--|-----------------|--|------------|--|-----------------|--|------------|--|-----------------|--|------------|--|-----------------|--|------------|--|-----------------|--|------------|--|-----------------|--|------------|--|-----------------|--|------------|--|-----------------|--|------------|--|-----------------|--|------------|--|-----------------|--|------------|--|-----------------|--|------------|--|-----------------|--|------------|--|-----------------|--|------------|--|-----------------|--|------------|--|-----------------|--|------------|--|-----------------|--|------------|--|-----------------|--|------------|--|-----------------|--|------------|--|-----------------|--|------------|--|-----------------|--|------------|--|-----------------|--|------------|--|-----------------|--|------------|--|-----------------|--|------------|--|-----------------|--|------------|--|-----------------|--|------------|--|-----------------|--|------------|--|-----------------|--|------------|--|-----------------|--|------------|--|-----------------|--|------------|--|-----------------|--|------------|--|-----------------|--|------------|--|-----------------|--|------------|--|-----------------|--|------------|--|-----------------|--|------------|--|-----------------|--|------------|--|-----------------|--|------------|--|-----------------|--|------------|--|-----------------|--|------------|--|-----------------|--|------------|--|-----------------|--|------------|--|-----------------|--|------------|--|-----------------|--|------------|--|-----------------|--|------------|--|-----------------|--|------------|--|-----------------|--|------------|--|-----------------|--|------------|--|-----------------|--|------------|--|-----------------|--|------------|--|-----------------|--|------------|--|-----------------|--|------------|--|-----------------|--|------------|--|-----------------|--|------------|--|-----------------|--|------------|--|-----------------|--|------------|--|-----------------|--|------------|--|-----------------|--|------------|--|-----------------|--|------------|--|-----------------|--|------------|--|-----------------|--|------------|--|-----------------|--|------------|--|-----------------|--|------------|--|-----------------|--|------------|--|-----------------|--|------------|--|-----------------|--|------------|--|-----------------|--|------------|--|-----------------|--|------------|--|-----------------|--|------------|--|-----------------|--|------------|--|-----------------|--|------------|--|-----------------|--|------------|--|-----------------|--|------------|--|-----------------|--|------------|--|-----------------|--|------------|--|-----------------|--|------------|--|-----------------|--|------------|--|-----------------|--|------------|--|-----------------|--|------------|--|-----------------|--|------------|--|-----------------|--|------------|--|-----------------|--|------------|--|-----------------|--|------------|--|-----------------|--|------------|--|-----------------|--|------------|--|-----------------|--|------------|--|-----------------|--|------------|--|-----------------|--|------------|--|-----------------|--|------------|--|-----------------|--|------------|--|-----------------|--|------------|--|-----------------|--|------------|--|-----------------|--|------------|--|-----------------|--|------------|--|-----------------|--|------------|--|-----------------|--|------------|--|-----------------|--|------------|--|-----------------|--|------------|--|-----------------|--|------------|--|-----------------|--|------------|--|-----------------|--|------------|--|-----------------|--|------------|--|-----------------|--|------------|--|-----------------|--|------------|--|-----------------|--|------------|--|-----------------|--|------------|--|-----------------|--|------------|--|



File: ESM\_10 (Online Resource)

Title: Comparative Multidimensional Molecular Analyses of Pediatric Diffuse Intrinsic Glioma Reveals Distinct Molecular Subtypes

Journal: Acta Neuropathologica

Authors: Amanda M. Stransik, Madhuri Kumbhakar, Kendall Snyder, Sidicki Yavuzli, Joe Devenney, Brennan Harmon, Jordan Hall, Eric H. Raabe, Ping An, Melanie Weingart, Brian Ross, Sarah Magee, Roger J. Packer, Javad Nazarian

Corresponding Author:

Javad Nazarian, Children's National Medical Center, Center for Genetic Medicine

111 Michigan Ave., NW, Washington DC, 20010

Phone: 202-476-6022 Fax: 202-476-6014

Email: J.Nazarian@CNMC.org

| FoldChange1010 |         |           |            |   |         |           |            |   |         | FoldChange1110 |            |   |         |           |            |   |         |           |            | FoldChange1210 |         |           |            |   |         |           |            |   |         | FoldChange1310 |            |   |         |           |            |   |         |           |            | FoldChange1410 |         |           |            |   |         |           |            |   |         | FoldChange1510 |            |   |         |           |            |   |         |           |            |   |         |           |            |   |         |           |            |   |         |           |            |   |         |           |            |   |         |           |            |   |         |           |            |   |         |           |            |   |         |           |            |   |         |           |            |   |         |           |            |   |         |           |            |   |         |           |            |   |         |           |            |   |         |           |            |   |         |           |            |   |         |           |            |   |         |           |            |   |         |           |            |   |         |           |            |   |         |           |            |   |         |           |            |   |         |           |            |   |         |           |            |   |         |           |            |   |         |           |            |   |         |           |            |   |         |           |            |   |         |           |            |   |         |           |            |   |         |           |            |   |         |           |            |   |         |           |            |   |         |           |            |   |         |           |            |   |         |           |            |   |         |           |            |   |         |           |            |   |         |           |            |   |         |           |            |   |         |           |            |   |         |           |            |   |         |           |            |   |         |           |            |   |         |           |            |   |         |           |            |   |         |           |            |   |         |           |            |   |         |           |            |   |         |           |            |   |         |           |            |   |         |           |            |   |         |           |            |   |         |           |            |   |         |           |            |   |         |           |            |   |         |           |            |   |         |           |            |   |         |           |            |   |         |           |            |   |         |           |            |   |         |           |            |   |         |           |            |   |         |           |            |   |         |           |            |   |         |           |            |   |         |           |            |   |         |           |            |   |         |           |            |   |         |           |            |   |         |           |            |   |         |           |            |   |         |           |            |   |         |           |            |   |         |           |            |   |         |           |            |   |         |           |            |   |         |           |            |   |         |           |            |   |         |           |            |   |         |           |            |   |         |           |            |   |         |           |            |   |         |           |            |   |         |           |            |   |         |           |            |   |         |           |            |   |         |           |            |   |         |           |            |   |         |           |            |   |         |           |            |   |         |           |            |   |         |           |            |   |         |           |            |   |         |           |            |   |         |           |            |   |         |           |            |   |         |           |            |   |         |           |            |   |         |           |            |   |         |           |            |   |         |           |            |   |         |           |            |   |         |           |            |   |         |           |            |   |         |           |            |   |         |           |            |   |         |           |            |   |         |           |            |   |         |           |            |   |         |           |            |   |         |           |            |   |         |           |            |   |         |           |            |   |         |           |            |   |         |           |            |   |         |           |            |   |         |           |            |   |         |           |            |   |         |           |            |   |         |           |            |   |         |           |            |   |         |           |            |   |         |           |            |   |         |           |            |   |         |           |            |   |         |           |            |   |         |           |            |   |         |           |            |   |         |           |            |   |         |           |            |   |         |           |            |   |         |           |            |   |         |           |            |   |         |           |            |   |         |           |            |   |         |           |            |   |         |           |            |   |         |           |            |   |         |           |            |   |         |           |            |   |         |           |            |   |         |           |            |   |         |           |            |   |         |           |            |   |         |           |            |   |         |           |            |   |         |           |            |   |         |           |            |   |         |           |            |   |         |           |            |   |         |           |            |   |         |           |            |   |         |           |            |   |         |           |            |   |         |           |            |   |         |           |            |   |         |           |            |   |         |           |            |   |         |           |            |   |         |           |            |   |         |           |            |   |         |           |            |   |         |           |            |   |         |           |            |   |         |           |            |   |         |           |            |   |         |           |            |   |         |           |            |   |         |           |            |   |         |           |            |   |         |           |            |   |         |           |            |   |         |           |            |   |         |           |            |   |         |           |            |   |         |           |            |   |         |
|----------------|---------|-----------|------------|---|---------|-----------|------------|---|---------|----------------|------------|---|---------|-----------|------------|---|---------|-----------|------------|----------------|---------|-----------|------------|---|---------|-----------|------------|---|---------|----------------|------------|---|---------|-----------|------------|---|---------|-----------|------------|----------------|---------|-----------|------------|---|---------|-----------|------------|---|---------|----------------|------------|---|---------|-----------|------------|---|---------|-----------|------------|---|---------|-----------|------------|---|---------|-----------|------------|---|---------|-----------|------------|---|---------|-----------|------------|---|---------|-----------|------------|---|---------|-----------|------------|---|---------|-----------|------------|---|---------|-----------|------------|---|---------|-----------|------------|---|---------|-----------|------------|---|---------|-----------|------------|---|---------|-----------|------------|---|---------|-----------|------------|---|---------|-----------|------------|---|---------|-----------|------------|---|---------|-----------|------------|---|---------|-----------|------------|---|---------|-----------|------------|---|---------|-----------|------------|---|---------|-----------|------------|---|---------|-----------|------------|---|---------|-----------|------------|---|---------|-----------|------------|---|---------|-----------|------------|---|---------|-----------|------------|---|---------|-----------|------------|---|---------|-----------|------------|---|---------|-----------|------------|---|---------|-----------|------------|---|---------|-----------|------------|---|---------|-----------|------------|---|---------|-----------|------------|---|---------|-----------|------------|---|---------|-----------|------------|---|---------|-----------|------------|---|---------|-----------|------------|---|---------|-----------|------------|---|---------|-----------|------------|---|---------|-----------|------------|---|---------|-----------|------------|---|---------|-----------|------------|---|---------|-----------|------------|---|---------|-----------|------------|---|---------|-----------|------------|---|---------|-----------|------------|---|---------|-----------|------------|---|---------|-----------|------------|---|---------|-----------|------------|---|---------|-----------|------------|---|---------|-----------|------------|---|---------|-----------|------------|---|---------|-----------|------------|---|---------|-----------|------------|---|---------|-----------|------------|---|---------|-----------|------------|---|---------|-----------|------------|---|---------|-----------|------------|---|---------|-----------|------------|---|---------|-----------|------------|---|---------|-----------|------------|---|---------|-----------|------------|---|---------|-----------|------------|---|---------|-----------|------------|---|---------|-----------|------------|---|---------|-----------|------------|---|---------|-----------|------------|---|---------|-----------|------------|---|---------|-----------|------------|---|---------|-----------|------------|---|---------|-----------|------------|---|---------|-----------|------------|---|---------|-----------|------------|---|---------|-----------|------------|---|---------|-----------|------------|---|---------|-----------|------------|---|---------|-----------|------------|---|---------|-----------|------------|---|---------|-----------|------------|---|---------|-----------|------------|---|---------|-----------|------------|---|---------|-----------|------------|---|---------|-----------|------------|---|---------|-----------|------------|---|---------|-----------|------------|---|---------|-----------|------------|---|---------|-----------|------------|---|---------|-----------|------------|---|---------|-----------|------------|---|---------|-----------|------------|---|---------|-----------|------------|---|---------|-----------|------------|---|---------|-----------|------------|---|---------|-----------|------------|---|---------|-----------|------------|---|---------|-----------|------------|---|---------|-----------|------------|---|---------|-----------|------------|---|---------|-----------|------------|---|---------|-----------|------------|---|---------|-----------|------------|---|---------|-----------|------------|---|---------|-----------|------------|---|---------|-----------|------------|---|---------|-----------|------------|---|---------|-----------|------------|---|---------|-----------|------------|---|---------|-----------|------------|---|---------|-----------|------------|---|---------|-----------|------------|---|---------|-----------|------------|---|---------|-----------|------------|---|---------|-----------|------------|---|---------|-----------|------------|---|---------|-----------|------------|---|---------|-----------|------------|---|---------|-----------|------------|---|---------|-----------|------------|---|---------|-----------|------------|---|---------|-----------|------------|---|---------|-----------|------------|---|---------|-----------|------------|---|---------|-----------|------------|---|---------|-----------|------------|---|---------|-----------|------------|---|---------|-----------|------------|---|---------|-----------|------------|---|---------|-----------|------------|---|---------|-----------|------------|---|---------|-----------|------------|---|---------|-----------|------------|---|---------|-----------|------------|---|---------|-----------|------------|---|---------|-----------|------------|---|---------|-----------|------------|---|---------|-----------|------------|---|---------|-----------|------------|---|---------|-----------|------------|---|---------|-----------|------------|---|---------|-----------|------------|---|---------|-----------|------------|---|---------|-----------|------------|---|---------|-----------|------------|---|---------|-----------|------------|---|---------|-----------|------------|---|---------|-----------|------------|---|---------|-----------|------------|---|---------|-----------|------------|---|---------|-----------|------------|---|---------|-----------|------------|---|---------|-----------|------------|---|---------|-----------|------------|---|---------|-----------|------------|---|---------|-----------|------------|---|---------|-----------|------------|---|---------|-----------|------------|---|---------|-----------|------------|---|---------|-----------|------------|---|---------|-----------|------------|---|---------|-----------|------------|---|---------|-----------|------------|---|---------|-----------|------------|---|---------|-----------|------------|---|---------|-----------|------------|---|---------|-----------|------------|---|---------|-----------|------------|---|---------|-----------|------------|---|---------|-----------|------------|---|---------|-----------|------------|---|---------|-----------|------------|---|---------|-----------|------------|---|---------|-----------|------------|---|---------|-----------|------------|---|---------|-----------|------------|---|---------|-----------|------------|---|---------|-----------|------------|---|---------|-----------|------------|---|---------|
| Gene ID        | P-value | MeanRatio | FoldChange | n | P-value | MeanRatio | FoldChange | n | P-value | MeanRatio      | FoldChange | n | P-value | MeanRatio | FoldChange | n | P-value | MeanRatio | FoldChange | n              | P-value | MeanRatio | FoldChange | n | P-value | MeanRatio | FoldChange | n | P-value | MeanRatio      | FoldChange | n | P-value | MeanRatio | FoldChange | n | P-value | MeanRatio | FoldChange | n              | P-value | MeanRatio | FoldChange | n | P-value | MeanRatio | FoldChange | n | P-value | MeanRatio      | FoldChange | n | P-value | MeanRatio | FoldChange | n | P-value | MeanRatio | FoldChange | n | P-value | MeanRatio | FoldChange | n | P-value | MeanRatio | FoldChange | n | P-value | MeanRatio | FoldChange | n | P-value | MeanRatio | FoldChange | n | P-value | MeanRatio | FoldChange | n | P-value | MeanRatio | FoldChange | n | P-value | MeanRatio | FoldChange | n | P-value | MeanRatio | FoldChange | n | P-value | MeanRatio | FoldChange | n | P-value | MeanRatio | FoldChange | n | P-value | MeanRatio | FoldChange | n | P-value | MeanRatio | FoldChange | n | P-value | MeanRatio | FoldChange | n | P-value | MeanRatio | FoldChange | n | P-value | MeanRatio | FoldChange | n | P-value | MeanRatio | FoldChange | n | P-value | MeanRatio | FoldChange | n | P-value | MeanRatio | FoldChange | n | P-value | MeanRatio | FoldChange | n | P-value | MeanRatio | FoldChange | n | P-value | MeanRatio | FoldChange | n | P-value | MeanRatio | FoldChange | n | P-value | MeanRatio | FoldChange | n | P-value | MeanRatio | FoldChange | n | P-value | MeanRatio | FoldChange | n | P-value | MeanRatio | FoldChange | n | P-value | MeanRatio | FoldChange | n | P-value | MeanRatio | FoldChange | n | P-value | MeanRatio | FoldChange | n | P-value | MeanRatio | FoldChange | n | P-value | MeanRatio | FoldChange | n | P-value | MeanRatio | FoldChange | n | P-value | MeanRatio | FoldChange | n | P-value | MeanRatio | FoldChange | n | P-value | MeanRatio | FoldChange | n | P-value | MeanRatio | FoldChange | n | P-value | MeanRatio | FoldChange | n | P-value | MeanRatio | FoldChange | n | P-value | MeanRatio | FoldChange | n | P-value | MeanRatio | FoldChange | n | P-value | MeanRatio | FoldChange | n | P-value | MeanRatio | FoldChange | n | P-value | MeanRatio | FoldChange | n | P-value | MeanRatio | FoldChange | n | P-value | MeanRatio | FoldChange | n | P-value | MeanRatio | FoldChange | n | P-value | MeanRatio | FoldChange | n | P-value | MeanRatio | FoldChange | n | P-value | MeanRatio | FoldChange | n | P-value | MeanRatio | FoldChange | n | P-value | MeanRatio | FoldChange | n | P-value | MeanRatio | FoldChange | n | P-value | MeanRatio | FoldChange | n | P-value | MeanRatio | FoldChange | n | P-value | MeanRatio | FoldChange | n | P-value | MeanRatio | FoldChange | n | P-value | MeanRatio | FoldChange | n | P-value | MeanRatio | FoldChange | n | P-value | MeanRatio | FoldChange | n | P-value | MeanRatio | FoldChange | n | P-value | MeanRatio | FoldChange | n | P-value | MeanRatio | FoldChange | n | P-value | MeanRatio | FoldChange | n | P-value | MeanRatio | FoldChange | n | P-value | MeanRatio | FoldChange | n | P-value | MeanRatio | FoldChange | n | P-value | MeanRatio | FoldChange | n | P-value | MeanRatio | FoldChange | n | P-value | MeanRatio | FoldChange | n | P-value | MeanRatio | FoldChange | n | P-value | MeanRatio | FoldChange | n | P-value | MeanRatio | FoldChange | n | P-value | MeanRatio | FoldChange | n | P-value | MeanRatio | FoldChange | n | P-value | MeanRatio | FoldChange | n | P-value | MeanRatio | FoldChange | n | P-value | MeanRatio | FoldChange | n | P-value | MeanRatio | FoldChange | n | P-value | MeanRatio | FoldChange | n | P-value | MeanRatio | FoldChange | n | P-value | MeanRatio | FoldChange | n | P-value | MeanRatio | FoldChange | n | P-value | MeanRatio | FoldChange | n | P-value | MeanRatio | FoldChange | n | P-value | MeanRatio | FoldChange | n | P-value | MeanRatio | FoldChange | n | P-value | MeanRatio | FoldChange | n | P-value | MeanRatio | FoldChange | n | P-value | MeanRatio | FoldChange | n | P-value | MeanRatio | FoldChange | n | P-value | MeanRatio | FoldChange | n | P-value | MeanRatio | FoldChange | n | P-value | MeanRatio | FoldChange | n | P-value | MeanRatio | FoldChange | n | P-value | MeanRatio | FoldChange | n | P-value | MeanRatio | FoldChange | n | P-value | MeanRatio | FoldChange | n | P-value | MeanRatio | FoldChange | n | P-value | MeanRatio | FoldChange | n | P-value | MeanRatio | FoldChange | n | P-value | MeanRatio | FoldChange | n | P-value | MeanRatio | FoldChange | n | P-value | MeanRatio | FoldChange | n | P-value | MeanRatio | FoldChange | n | P-value | MeanRatio | FoldChange | n | P-value | MeanRatio | FoldChange | n | P-value | MeanRatio | FoldChange | n | P-value | MeanRatio | FoldChange | n | P-value | MeanRatio | FoldChange | n | P-value | MeanRatio | FoldChange | n | P-value | MeanRatio | FoldChange | n | P-value | MeanRatio | FoldChange | n | P-value | MeanRatio | FoldChange | n | P-value | MeanRatio | FoldChange | n | P-value | MeanRatio | FoldChange | n | P-value | MeanRatio | FoldChange | n | P-value | MeanRatio | FoldChange | n | P-value | MeanRatio | FoldChange | n | P-value | MeanRatio | FoldChange | n | P-value | MeanRatio | FoldChange | n | P-value | MeanRatio | FoldChange | n | P-value | MeanRatio | FoldChange | n | P-value | MeanRatio | FoldChange | n | P-value | MeanRatio | FoldChange | n | P-value | MeanRatio | FoldChange | n | P-value | MeanRatio | FoldChange | n | P-value | MeanRatio | FoldChange | n | P-value | MeanRatio | FoldChange | n | P-value | MeanRatio | FoldChange | n | P-value | MeanRatio | FoldChange | n | P-value | MeanRatio | FoldChange | n | P-value | MeanRatio | FoldChange | n | P-value | MeanRatio | FoldChange | n | P-value | MeanRatio | FoldChange | n | P-value | MeanRatio | FoldChange | n | P-value | MeanRatio | FoldChange | n | P-value | MeanRatio | FoldChange | n | P-value | MeanRatio | FoldChange | n | P-value | MeanRatio | FoldChange | n | P-value | MeanRatio | FoldChange | n | P-value | MeanRatio | FoldChange | n | P-value | MeanRatio | FoldChange | n | P-value | MeanRatio | FoldChange | n | P-value | MeanRatio | FoldChange | n | P-value | MeanRatio | FoldChange | n | P-value | MeanRatio | FoldChange | n | P-value | MeanRatio | FoldChange | n | P-value | MeanRatio | FoldChange | n | P-value | MeanRatio | FoldChange | n | P-value | MeanRatio | FoldChange | n | P-value | MeanRatio | FoldChange | n | P-value | MeanRatio | FoldChange | n | P-value | MeanRatio | FoldChange | n | P-value | MeanRatio | FoldChange | n | P-value | MeanRatio | FoldChange | n | P-value | MeanRatio | FoldChange | n | P-value | MeanRatio | FoldChange | n | P-value | MeanRatio | FoldChange | n | P-value | MeanRatio | FoldChange | n | P-value | MeanRatio | FoldChange | n | P-value | MeanRatio | FoldChange | n | P-value | MeanRatio | FoldChange | n | P-value | MeanRatio | FoldChange | n | P-value | MeanRatio | FoldChange | n | P-value | MeanRatio | FoldChange | n | P-value | MeanRatio | FoldChange | n | P-value | MeanRatio | FoldChange | n | P-value | MeanRatio | FoldChange | n | P-value | MeanRatio | FoldChange | n | P-value | MeanRatio | FoldChange | n | P-value | MeanRatio | FoldChange | n | P-value | MeanRatio | FoldChange | n | P-value | MeanRatio | FoldChange | n | P-value | MeanRatio | FoldChange | n | P-value | MeanRatio | FoldChange | n | P-value | MeanRatio | FoldChange | n | P-value |

File: ISM\_10 (Online Resource)
Title: Comparative Multidimensional Molecular Analyses of Pediatric Diffuse Intrinsic Piloile Glia Reveals Distinct Molecular Subtypes
Journal: Acta Neuropathologica

Authors: Amanda M. Stranski, Madhuri Kumbhakar, Kendall Sykes, Sidicki Yavuz, Joe Devenney, Brennan Harmon, Jordan Hall, Eric R. Haube, Ping An, Melanie Weingart, Brian Reid, Sarah Magee, Roger J. Packer, Javad Nazarian

Corresponding Author: Javad Nazarian, Children's National Medical Center, Center for Genetic Medicine, 111 Michigan Ave., NW, Washington DC, 20010
Phone: 202-476-0021; Fax: 202-476-6014
Email: J.Nazarian@CNMC.org

| FoldChange[106] |  |  | FoldChange[111] |  |  | FoldChange[112] |  |  | FoldChange[121] |  |  | FoldChange[137] |  |  | FoldChange[153] |  |  | FoldChange[157] |  |  | FoldChange[165] |  |  | FoldChange[170] |  |  | FoldChange[172] |  |  | FoldChange[173] |  |  | FoldChange[174] |  |  | FoldChange[175] |  |  | FoldChange[176] |  |  | FoldChange[177] |  |  | FoldChange[178] |  |  | FoldChange[179] |  |  | FoldChange[180] |  |  | FoldChange[181] |  |  | FoldChange[182] |  |  | FoldChange[183] |  |  | FoldChange[184] |  |  | FoldChange[185] |  |  | FoldChange[186] |  |  | FoldChange[187] |  |  | FoldChange[188] |  |  | FoldChange[189] |  |  | FoldChange[190] |  |  | FoldChange[191] |  |  | FoldChange[192] |  |  | FoldChange[193] |  |  | FoldChange[194] |  |  | FoldChange[195] |  |  | FoldChange[196] |  |  | FoldChange[197] |  |  | FoldChange[198] |  |  | FoldChange[199] |  |  | FoldChange[200] |  |  | FoldChange[201] |  |  | FoldChange[202] |  |  | FoldChange[203] |  |  | FoldChange[204] |  |  | FoldChange[205] |  |  | FoldChange[206] |  |  | FoldChange[207] |  |  | FoldChange[208] |  |  | FoldChange[209] |  |  | FoldChange[210] |  |  | FoldChange[211] |  |  | FoldChange[212] |  |  | FoldChange[213] |  |  | FoldChange[214] |  |  | FoldChange[215] |  |  | FoldChange[216] |  |  | FoldChange[217] |  |  | FoldChange[218] |  |  | FoldChange[219] |  |  | FoldChange[220] |  |  | FoldChange[221] |  |  | FoldChange[222] |  |  | FoldChange[223] |  |  | FoldChange[224] |  |  | FoldChange[225] |  |  | FoldChange[226] |  |  | FoldChange[227] |  |  | FoldChange[228] |  |  | FoldChange[229] |  |  | FoldChange[230] |  |  | FoldChange[231] |  |  | FoldChange[232] |  |  | FoldChange[233] |  |  | FoldChange[234] |  |  | FoldChange[235] |  |  | FoldChange[236] |  |  | FoldChange[237] |  |  | FoldChange[238] |  |  | FoldChange[239] |  |  | FoldChange[240] |  |  | FoldChange[241] |  |  | FoldChange[242] |  |  | FoldChange[243] |  |  | FoldChange[244] |  |  | FoldChange[245] |  |  | FoldChange[246] |  |  | FoldChange[247] |  |  | FoldChange[248] |  |  | FoldChange[249] |  |  | FoldChange[250] |  |  | FoldChange[251] |  |  | FoldChange[252] |  |  | FoldChange[253] |  |  | FoldChange[254] |  |  | FoldChange[255] |  |  | FoldChange[256] |  |  | FoldChange[257] |  |  | FoldChange[258] |  |  | FoldChange[259] |  |  | FoldChange[260] |  |  | FoldChange[261] |  |  | FoldChange[262] |  |  | FoldChange[263] |  |  | FoldChange[264] |  |  | FoldChange[265] |  |  | FoldChange[266] |  |  | FoldChange[267] |  |  | FoldChange[268] |  |  | FoldChange[269] |  |  | FoldChange[270] |  |  | FoldChange[271] |  |  | FoldChange[272] |  |  | FoldChange[273] |  |  | FoldChange[274] |  |  | FoldChange[275] |  |  | FoldChange[276] |  |  | FoldChange[277] |  |  | FoldChange[278] |  |  | FoldChange[279] |  |  | FoldChange[280] |  |  | FoldChange[281] |  |  | FoldChange[282] |  |  | FoldChange[283] |  |  | FoldChange[284] |  |  | FoldChange[285] |  |  | FoldChange[286] |  |  | FoldChange[287] |  |  | FoldChange[288] |  |  | FoldChange[289] |  |  | FoldChange[290] |  |  | FoldChange[291] |  |  | FoldChange[292] |  |  | FoldChange[293] |  |  | FoldChange[294] |  |  | FoldChange[295] |  |  | FoldChange[296] |  |  | FoldChange[297] |  |  | FoldChange[298] |  |  | FoldChange[299] |  |  | FoldChange[300] |  |  | FoldChange[301] |  |  | FoldChange[302] |  |  | FoldChange[303] |  |  | FoldChange[304] |  |  | FoldChange[305] |  |  | FoldChange[306] |  |  | FoldChange[307] |  |  | FoldChange[308] |  |  | FoldChange[309] |  |  | FoldChange[310] |  |  | FoldChange[311] |  |  | FoldChange[312] |  |  | FoldChange[313] |  |  | FoldChange[314] |  |  | FoldChange[315] |  |  | FoldChange[316] |  |  | FoldChange[317] |  |  | FoldChange[318] |  |  | FoldChange[319] |  |  | FoldChange[320] |  |  | FoldChange[321] |  |  | FoldChange[322] |  |  | FoldChange[323] |  |  | FoldChange[324] |  |  | FoldChange[325] |  |  | FoldChange[326] |  |  | FoldChange[327] |  |  | FoldChange[328] |  |  | FoldChange[329] |  |  | FoldChange[330] |  |  | FoldChange[331] |  |  | FoldChange[332] |  |  | FoldChange[333] |  |  | FoldChange[334] |  |  | FoldChange[335] |  |  | FoldChange[336] |  |  | FoldChange[337] |  |  | FoldChange[338] |  |  | FoldChange[339] |  |  | FoldChange[340] |  |  | FoldChange[341] |  |  | FoldChange[342] |  |  | FoldChange[343] |  |  | FoldChange[344] |  |  | FoldChange[345] |  |  | FoldChange[346] |  |  | FoldChange[347] |  |  | FoldChange[348] |  |  | FoldChange[349] |  |  | FoldChange[350] |  |  | FoldChange[351] |  |  | FoldChange[352] |  |  | FoldChange[353] |  |  | FoldChange[354] |  |  | FoldChange[355] |  |  | FoldChange[356] |  |  | FoldChange[357] |  |  | FoldChange[358] |  |  | FoldChange[359] |  |  | FoldChange[360] |  |  | FoldChange[361] |  |  | FoldChange[362] |  |  | FoldChange[363] |  |  | FoldChange[364] |  |  | FoldChange[365] |  |  | FoldChange[366] |  |  | FoldChange[367] |  |  | FoldChange[368] |  |  | FoldChange[369] |  |  | FoldChange[370] |  |  | FoldChange[371] |  |  | FoldChange[372] |  |  | FoldChange[373] |  |  | FoldChange[374] |  |  | FoldChange[375] |  |  | FoldChange[376] |  |  | FoldChange[377] |  |  | FoldChange[378] |  |  | FoldChange[379] |  |  | FoldChange[380] |  |  | FoldChange[381] |  |  | FoldChange[382] |  |  | FoldChange[383] |  |  | FoldChange[384] |  |  | FoldChange[385] |  |  | FoldChange[386] |  |  | FoldChange[387] |  |  | FoldChange[388] |  |  | FoldChange[389] |  |  | FoldChange[390] |  |  | FoldChange[391] |  |  | FoldChange[392] |  |  | FoldChange[393] |  |  | FoldChange[394] |  |  | FoldChange[395] |  |  | FoldChange[396] |  |  | FoldChange[397] |  |  | FoldChange[398] |  |  | FoldChange[399] |  |  | FoldChange[400] |  |  | FoldChange[401] |  |  | FoldChange[402] |  |  | FoldChange[403] |  |  | FoldChange[404] |  |  | FoldChange[405] |  |  | FoldChange[406] |  |  | FoldChange[407] |  |  | FoldChange[408] |  |  | FoldChange[409] |  |  | FoldChange[410] |  |  | FoldChange[411] |  |  | FoldChange[412] |  |  | FoldChange[413] |  |  | FoldChange[414] |  |  | FoldChange[415] |  |  | FoldChange[416] |  |  | FoldChange[417] |  |  | FoldChange[418] |  |  | FoldChange[419] |  |  | FoldChange[420] |  |  | FoldChange[421] |  |  | FoldChange[422] |  |  | FoldChange[423] |  |  | FoldChange[424] |  |  | FoldChange[425] |  |  | FoldChange[426] |  |  | FoldChange[427] |  |  | FoldChange[428] |  |  | FoldChange[429] |  |  | FoldChange[430] |  |  | FoldChange[431] |  |  | FoldChange[432] |  |  | FoldChange[433] |  |  | FoldChange[434] |  |  | FoldChange[435] |  |  | FoldChange[436] |  |  | FoldChange[437] |  |  | FoldChange[438] |  |  | FoldChange[439] |  |  | FoldChange[440] |  |  | FoldChange[441] |  |  | FoldChange[442] |  |  | FoldChange[443] |  |  | FoldChange[444] |  |  | FoldChange[445] |  |  | FoldChange[446] |  |  | FoldChange[447] |  |  | FoldChange[448] |  |  | FoldChange[449] |  |  | FoldChange[450] |  |  | FoldChange[451] |  |  | FoldChange[452] |  |  | FoldChange[453] |  |  | FoldChange[454] |  |  | FoldChange[455] |  |  | FoldChange[456] |  |  | FoldChange[457] |  |  | FoldChange[458] |  |  | FoldChange[459] |  |  | FoldChange[460] |  |  | FoldChange[461] |  |  | FoldChange[462] |  |  | FoldChange[463] |  |  | FoldChange[464] |  |  | FoldChange[465] |  |  | FoldChange[466] |  |  | FoldChange[467] |  |  | FoldChange[468] |  |  | FoldChange[469] |  |  | FoldChange[470] |  |  | FoldChange[471] |  |  | FoldChange[472] |  |  | FoldChange[473] |  |  | FoldChange[474] |  |  | FoldChange[475] |  |  | FoldChange[476] |  |  | FoldChange[477] |  |  | FoldChange[478] |  |  | FoldChange[479] |  |  | FoldChange[480] |  |  | FoldChange[481] |  |  | FoldChange[482] |  |  | FoldChange[483] |  |  | FoldChange[484] |  |  | FoldChange[485] |  |  | FoldChange[486] |  |  | FoldChange[487] |  |  | FoldChange[488] |  |  | FoldChange[489] |  |  | FoldChange[490] |  |  | FoldChange[491] |  |  | FoldChange[492] |  |  | FoldChange[493] |  |  | FoldChange[494] |  |  | FoldChange[495] |  |  | FoldChange[496] |  |  | FoldChange[497] |  |  | FoldChange[498] |  |  | FoldChange[499] |  |  | FoldChange[500] |  |  | FoldChange[501] |  |  | FoldChange[502] |  |  | FoldChange[503] |  |  | FoldChange[504] |  |  | FoldChange[505] |  |  | FoldChange[506] |  |  | FoldChange[507] |  |  | FoldChange[508] |  |  | FoldChange[509] |  |  | FoldChange[510] |  |  | FoldChange[511] |  |  | FoldChange[512] |  |  | FoldChange[513] |  |  | FoldChange[514] |  |  | FoldChange[515] |  |  | FoldChange[516] |  |  | FoldChange[517] |  |  | FoldChange[518] |  |  | FoldChange[519] |  |  | FoldChange[520] |  |  | FoldChange[521] |  |  | FoldChange[522] |  |  | FoldChange[523] |  |  | FoldChange[524] |  |  | FoldChange[525] |  |  | FoldChange[526] |  |  | FoldChange[527] |  |  | FoldChange[528] |  |  | FoldChange[529] |  |  | FoldChange[530] |  |  | FoldChange[531] |  |  | FoldChange[532] |  |  | FoldChange[533] |  |  | FoldChange[534] |  |  | FoldChange[535] |  |  | FoldChange[536] |  |  | FoldChange[537] |  |  | FoldChange[538] |  |  | FoldChange[539] |  |  | FoldChange[540] |  |  | FoldChange[541] |  |  | FoldChange[542] |  |  | FoldChange[543] |  |  | FoldChange[544] |  |  | FoldChange[545] |  |  | FoldChange[546] |  |  | FoldChange[547] |  |  | FoldChange[548] |  |  | FoldChange[549] |  |  | FoldChange[550] |  |  | FoldChange[551] |  |  | FoldChange[552] |  |  | FoldChange[553] |  |  | FoldChange[554] |  |  | FoldChange[555] |  |  | FoldChange[556] |  |  | FoldChange[557] |  |  | FoldChange[558] |  |  | FoldChange[559] |  |  | FoldChange[560] |  |  | FoldChange[561] |  |  | FoldChange[562] |  |  | FoldChange[563] |  |  | FoldChange[564] |  |  | FoldChange[565] |  |  | FoldChange[566] |  |  | FoldChange[567] |  |  | FoldChange[568] |  |  | FoldChange[569] |  |  | FoldChange[570] |  |  | FoldChange[571] |  |  | FoldChange[572] |  |  | FoldChange[573] |  |  | FoldChange[574] |  |  | FoldChange[575] |  |  | FoldChange[576] |  |  | FoldChange[577] |  |  | FoldChange[578] |  |  | FoldChange[579] |  |  | FoldChange[580] |  |  | FoldChange[581] |  |  | FoldChange[582] |  |  | FoldChange[583] |  |  | FoldChange[584] |  |  | FoldChange[585] |  |  | FoldChange[586] |  |  | FoldChange[587] |  |  | FoldChange[588] |  |  | FoldChange[589] |  |  | FoldChange[590] |  |  | FoldChange[591] |  |  | FoldChange[592] |  |  | FoldChange[593] |  |  | FoldChange[594] |  |  | FoldChange[595] |  |  | FoldChange[596] |  |  | FoldChange[597] |  |  | FoldChange[598] |  |  | FoldChange[599] |  |  | FoldChange[600] |  |  | FoldChange[601] |  |  | FoldChange[602] |  |  | FoldChange[603] |  |  | FoldChange[604] |  |  | FoldChange[605] |  |  | FoldChange[606] |  |  | FoldChange[607] |  |  | FoldChange[608] |  |  | FoldChange[609] |  |  | FoldChange[610] |  |  | FoldChange[611] |  |  | FoldChange[612] |  |  | FoldChange[613] |  |  | FoldChange[614] |  |  | FoldChange[615] |  |  | FoldChange[616] |  |  | FoldChange[617] |  |  | FoldChange[618] |  |  | FoldChange[619] |  |  | FoldChange[620] |  |  | FoldChange[621] |  |  | FoldChange[622] |  |  | FoldChange[623] |  |  | FoldChange[624] |  |  | FoldChange[625] |  |  | FoldChange[626] |  |  | FoldChange[627] |  |  | FoldChange[628] |  |  | FoldChange[629] |  |  | FoldChange[630] |  |  | FoldChange[631] |  |  | FoldChange[632] |  |  | FoldChange[633] |  |  | FoldChange[634] |  |  | FoldChange[635] |  |  | FoldChange[636] |  |  | FoldChange[637] |  |  | FoldChange[638] |  |  | FoldChange[639] |  |  | FoldChange[640] |  |  | FoldChange[641] |  |  | FoldChange[642] |  |  | FoldChange[643] |  |  | FoldChange[644] |  |  | FoldChange[645] |  |  | FoldChange[646] |  |  | FoldChange[647] |  |  | FoldChange[648] |  |  | FoldChange[649] |  |  | FoldChange[650] |  |  | FoldChange[651] |  |  | FoldChange[652] |  |  | FoldChange[653] |  |  | FoldChange[654] |  |  | FoldChange[655] |  |  | FoldChange[656] |  |  | FoldChange[657] |  |  | FoldChange[658] |  |  | FoldChange[659] |  |  | FoldChange[660] |  |  | FoldChange[661] |  |  | FoldChange[662] |  |  | FoldChange[663] |  |  | FoldChange[664] |  |  | FoldChange[665] |  |  | FoldChange[666] |  |  | FoldChange[667] |  |  | FoldChange[668] |  |  | FoldChange[669] |  |  | FoldChange[670] |  |  | FoldChange[671] |  |  | FoldChange[672] |  |  | FoldChange[673] |  |  | FoldChange[674] |  |  | FoldChange[675] |  |  | FoldChange[676] |  |  | FoldChange[677] |  |  | FoldChange[678] |  |  | FoldChange[679] |  |  | FoldChange[680] |  |  | FoldChange[681] |  |  | FoldChange[682] |  |  | FoldChange[683] |  |  | FoldChange[684] |  |  | FoldChange[685] |  |  | FoldChange[686] |  |  | FoldChange[687] |  |  | FoldChange[688] |  |  | FoldChange[689] |  |  | FoldChange[690] |  |  | FoldChange[691] |  |  | FoldChange[692] |  |  | FoldChange[693] |  |  | FoldChange[694] |  |  | FoldChange[695] |  |  | FoldChange[696] |  |  | FoldChange[697] |  |  | FoldChange[698] |  |  | FoldChange[699] |  |  | FoldChange[700] |  |  | FoldChange[701] |  |  | FoldChange[702] |  |  | FoldChange[703] |  |  | FoldChange[704] |  |  | FoldChange[705] |  |  | FoldChange[706] |  |  | FoldChange[707] |  |  | FoldChange[708] |  |  | FoldChange[709] |  |  | FoldChange[710] |  |  | FoldChange[711] |  |  | FoldChange[712] |  |  | FoldChange[713] |  |  | FoldChange[714] |  |  | FoldChange[715] |  |  | FoldChange[716] |  |  | FoldChange[717] |  |  | FoldChange[718] |  |  | FoldChange[719] |  |  | FoldChange[720] |  |  | FoldChange[721] |  |  | FoldChange[722] |  |  | FoldChange[723] |  |  | FoldChange[724] |  |  | FoldChange[725] |  |  | FoldChange[726] |  |  | FoldChange[727] |  |  | FoldChange[728] |  |  | FoldChange[729] |  |  | FoldChange[730] |  |  | FoldChange[731] |  |  | FoldChange[732] |  |  | FoldChange[733] |  |  | FoldChange[734] |  |  | FoldChange[735] |  |  | FoldChange[736] |  |  | FoldChange[737] |  |  | FoldChange[738] |  |  | FoldChange[739] |  |  | FoldChange[740] |  |  | FoldChange[741] |  |  | FoldChange[742] |  |  | FoldChange[743] |  |  | FoldChange[744] |  |  | FoldChange[745] |  |  | FoldChange[746] |  |  | FoldChange[747] |  |  | FoldChange[748] |  |  | FoldChange[749] |  |  | FoldChange[750] |  |  | FoldChange[751] |  |  | FoldChange[752] |  |  | FoldChange[753] |  |  | FoldChange[754] |  |  | FoldChange[755] |  |  | FoldChange[756] |  |  | FoldChange[757] |  |  | FoldChange[758] |  |  | FoldChange[759] |  |  | FoldChange[760] |  |  | FoldChange[761] |  |  | FoldChange[762] |  |  | FoldChange[763] |  |  | FoldChange[764] |  |  | FoldChange[765] |  |  | FoldChange[766] |  |  | FoldChange[767] |  |  | FoldChange[768] |  |  | FoldChange[769] |  |  | FoldChange[770] |  |  | FoldChange[771] |  |  | FoldChange[772] |  |  | FoldChange[773] |  |  | FoldChange[774] |  |  | FoldChange[775] |  |  | FoldChange[776] |  |  | FoldChange[777] |  |  | FoldChange[778] |  |  | FoldChange[779] |  |  | FoldChange[780] |  |  | FoldChange[781] |  |  | FoldChange[782] |  |  | FoldChange[783] |  |  | FoldChange[784] |  |  | FoldChange[785] |  |  | FoldChange[786] |  |  | FoldChange[787] |  |  | FoldChange[788] |  |  | FoldChange[789] |  |  | FoldChange[790] |  |  | FoldChange[791] |  |  | FoldChange[792] |  |  | FoldChange[793] |  |  | FoldChange[794] |  |  | FoldChange[795] |  |  | FoldChange[796] |  |  | FoldChange[797] |  |  | FoldChange[798] |  |  | FoldChange[799] |  |  | FoldChange[800] |  |  | FoldChange[801] |  |  | FoldChange[802] |  |  | FoldChange[803] |  |  | FoldChange[804] |  |  | FoldChange[805] |  |  | FoldChange[806] |  |  | FoldChange[807] |  |  | FoldChange[808] |  |  | FoldChange[809] |  |  | FoldChange[810] |  |  | FoldChange[811] |  |  | FoldChange[812] |  |  | FoldChange[813] |  |  | FoldChange[814] |  |  | FoldChange[815] |  |  | FoldChange[816] |  |  | FoldChange[817] |  |  | FoldChange[818] |  |  | FoldChange[819] |  |  | FoldChange[820] |  |  | FoldChange[821] |  |  | FoldChange[822] |  |  | FoldChange[823] |  |  | FoldChange[824] |  |  | FoldChange[825] |  |  | FoldChange[826] |  |  | FoldChange[827] |  |  | FoldChange[828] |  |  | FoldChange[829] |  |  | FoldChange[830] |  |  | FoldChange[831] |  |  | FoldChange[832] |  |  | FoldChange[833] |  |  | FoldChange[834] |  |  | FoldChange[835] |  |  | FoldChange[836] |  |  | FoldChange[837] |  |  | FoldChange[838] |  |  | FoldChange[839] |  |  | FoldChange[840] |  |  | FoldChange[841] |  |  | FoldChange[842] |  |  | FoldChange[843] |  |  | FoldChange[844] |  |  | FoldChange[845] |  |  | FoldChange[846] |  |  | FoldChange[847] |  |  | FoldChange[848] |  |  | FoldChange[849] |  |  | FoldChange[850] |  |  | FoldChange[851] |  |  | FoldChange[852] |  |  | FoldChange[853] |  |  | FoldChange[854] |  |  | FoldChange[855] |  |  | FoldChange[856] |  |  | FoldChange[857] |  |  | FoldChange[858] |  |  | FoldChange[859] |  |  | FoldChange[860] |  |  | FoldChange[861] |  |  | FoldChange[862] |  |  | FoldChange[863] |  |  | FoldChange[864] |  |  | FoldChange[865] |  |  | FoldChange[866] |  |  | FoldChange[867] |  |  | FoldChange[868] |  |  | FoldChange[869] |  |  | FoldChange[870] |  |  | FoldChange[871] |  |  | FoldChange[872] |  |  | FoldChange[873] |  |  | FoldChange[874] |  |  | FoldChange[875] |  |  | FoldChange[876] |  |  | FoldChange[877] |  |  | FoldChange[878] |  |  | FoldChange[879] |  |  | FoldChange[880] |  |  | FoldChange[881] |  |  | FoldChange[882] |  |  | FoldChange[883] |  |  | FoldChange[884] |  |  | FoldChange[885] |  |  | FoldChange[886] |  |  | FoldChange[887] |  |  | FoldChange[888] |  |  | FoldChange[889] |  |  | FoldChange[890] |  |  | FoldChange[891] |  |  | FoldChange[892] |  |  | FoldChange[893] |  |  | FoldChange[894] |  |  | FoldChange[895] |  |  | FoldChange[896] |  |  | FoldChange[897] |  |  | FoldChange[898] |  |  | FoldChange[899] |  |  | FoldChange[900] |  |  | FoldChange[901] |  |  | FoldChange[902] |  |  | FoldChange[903] |  |  | FoldChange[904] |  |  | FoldChange[905] |  |  | FoldChange[906] |  |  | FoldChange[907] |  |  | FoldChange[908] |  |  | FoldChange[909] |  |  | FoldChange[910] |  |  | FoldChange[911] |  |  | FoldChange[912] |  |  | FoldChange[913] |  |  | FoldChange[914] |  |  | FoldChange[915] |  |  | FoldChange[916] |  |  | FoldChange[917] |  |  | FoldChange[918] |  |  | FoldChange[919] |  |  | FoldChange[920] |  |  | FoldChange[921] |  |  | FoldChange[922] |  |  | FoldChange[923] |  |  | FoldChange[924] |  |  | FoldChange[925] |  |  | FoldChange[926] |  |  | FoldChange[927] |  |  | FoldChange[928] |  |  | FoldChange[929] |  |  | FoldChange[930] |  |  | FoldChange[931] |  |  | FoldChange[932] |  |  | FoldChange[933] |  |  | FoldChange[934] |  |  | FoldChange[935] |  |  | FoldChange[936] |  |  | FoldChange[937] |  |  | FoldChange[938] |  |  | FoldChange[939] |  |  | FoldChange[940] |  |  | FoldChange[941] |  |  | FoldChange[942] |  |  | FoldChange[943] |  |  | FoldChange[944] |  |  | FoldChange[945] |  |  | FoldChange[946] |  |  | FoldChange[947] |  |  | FoldChange[948] |  |  | FoldChange[949] |  |  | FoldChange[950] |  |  | FoldChange[951] |  |  | FoldChange[952] |  |  | FoldChange[953] |  |  | FoldChange[954] |  |  | FoldChange[955] |  |  | FoldChange[956] |  |  | FoldChange[957] |  |  | FoldChange[958] |  |  | FoldChange[959] |  |  | FoldChange[960] |  |  | FoldChange[961] |  |  | FoldChange[962] |  |  | FoldChange[963] |  |  | FoldChange[964] |  |  | FoldChange[965] |  |  | FoldChange[966] |  |  | FoldChange[967] |  |  | FoldChange[968] |  |  | FoldChange[969] |  |  | FoldChange[970] |  |  | FoldChange[971] |  |  | FoldChange[972] |  |  | FoldChange[973] |  |  | FoldChange[974] |  |  | FoldChange[975] |  |  | FoldChange[976] |  |  | FoldChange[977] |  |  | FoldChange[978] |  |  | FoldChange[979] |  |  | FoldChange[980] |  |  | FoldChange[981] |  |  | FoldChange[982] |  |  | FoldChange[983] |  |  | FoldChange[984] |  |  | FoldChange[985] |  |  | FoldChange[986] |  |  | FoldChange[987] |  |  | FoldChange[988] |  |  | FoldChange[989] |  |  | FoldChange[990] |  |  | FoldChange[991] |  |  | FoldChange[992] |  |  | FoldChange[993] |  |  | FoldChange[994] |  |  | FoldChange[995] |  |  | FoldChange[996] |  |  | FoldChange[997] |  |  | FoldChange[998] |  |  | FoldChange[999] |  |  | FoldChange[1000] |  |  | FoldChange[1001] |  |  | FoldChange[1002] |  |  | FoldChange[1003] |  |  | FoldChange[1004] |  |  | FoldChange[1005] |  |  | FoldChange[1006] |  |  | FoldChange[1007] |  |  | FoldChange[1008] |  |  | FoldChange[1009] |  |  | FoldChange[1010] |  |  | FoldChange[1011] |  |  | FoldChange[1012] |  |  | FoldChange[1013] |  |  | FoldChange[1014] |  |  | FoldChange[1015] |  |  | FoldChange[1016] |  |  | FoldChange[1017] |  |  | FoldChange[1018] |  |  | FoldChange[1019] |  |  | FoldChange[1020] |  |  | FoldChange[1021] |  |  | FoldChange[1022] |  |  | FoldChange[1023] |  |  | FoldChange[1024] |  |  | FoldChange[1025] |  |  | FoldChange[1026] |  |  | FoldChange[1027] |  |  | FoldChange[1028] |  |  | FoldChange[1029] |  |  | FoldChange[1030] |  |  | FoldChange[1031] |  |  | FoldChange[1032] |  |  | FoldChange[1033] |  |  | FoldChange[1034] |  |  | FoldChange[1035] |  |  | FoldChange[1036] |  |  | FoldChange[1037] |  |  | FoldChange[1038] |  |  | FoldChange[1039] |  |  | FoldChange[1040] |  |  | FoldChange[1041] |  |  | FoldChange[1042] |  |  | FoldChange[1043] |  |  |
|-----------------|--|--|-----------------|--|--|-----------------|--|--|-----------------|--|--|-----------------|--|--|-----------------|--|--|-----------------|--|--|-----------------|--|--|-----------------|--|--|-----------------|--|--|-----------------|--|--|-----------------|--|--|-----------------|--|--|-----------------|--|--|-----------------|--|--|-----------------|--|--|-----------------|--|--|-----------------|--|--|-----------------|--|--|-----------------|--|--|-----------------|--|--|-----------------|--|--|-----------------|--|--|-----------------|--|--|-----------------|--|--|-----------------|--|--|-----------------|--|--|-----------------|--|--|-----------------|--|--|-----------------|--|--|-----------------|--|--|-----------------|--|--|-----------------|--|--|-----------------|--|--|-----------------|--|--|-----------------|--|--|-----------------|--|--|-----------------|--|--|-----------------|--|--|-----------------|--|--|-----------------|--|--|-----------------|--|--|-----------------|--|--|-----------------|--|--|-----------------|--|--|-----------------|--|--|-----------------|--|--|-----------------|--|--|-----------------|--|--|-----------------|--|--|-----------------|--|--|-----------------|--|--|-----------------|--|--|-----------------|--|--|-----------------|--|--|-----------------|--|--|-----------------|--|--|-----------------|--|--|-----------------|--|--|-----------------|--|--|-----------------|--|--|-----------------|--|--|-----------------|--|--|-----------------|--|--|-----------------|--|--|-----------------|--|--|-----------------|--|--|-----------------|--|--|-----------------|--|--|-----------------|--|--|-----------------|--|--|-----------------|--|--|-----------------|--|--|-----------------|--|--|-----------------|--|--|-----------------|--|--|-----------------|--|--|-----------------|--|--|-----------------|--|--|-----------------|--|--|-----------------|--|--|-----------------|--|--|-----------------|--|--|-----------------|--|--|-----------------|--|--|-----------------|--|--|-----------------|--|--|-----------------|--|--|-----------------|--|--|-----------------|--|--|-----------------|--|--|-----------------|--|--|-----------------|--|--|-----------------|--|--|-----------------|--|--|-----------------|--|--|-----------------|--|--|-----------------|--|--|-----------------|--|--|-----------------|--|--|-----------------|--|--|-----------------|--|--|-----------------|--|--|-----------------|--|--|-----------------|--|--|-----------------|--|--|-----------------|--|--|-----------------|--|--|-----------------|--|--|-----------------|--|--|-----------------|--|--|-----------------|--|--|-----------------|--|--|-----------------|--|--|-----------------|--|--|-----------------|--|--|-----------------|--|--|-----------------|--|--|-----------------|--|--|-----------------|--|--|-----------------|--|--|-----------------|--|--|-----------------|--|--|-----------------|--|--|-----------------|--|--|-----------------|--|--|-----------------|--|--|-----------------|--|--|-----------------|--|--|-----------------|--|--|-----------------|--|--|-----------------|--|--|-----------------|--|--|-----------------|--|--|-----------------|--|--|-----------------|--|--|-----------------|--|--|-----------------|--|--|-----------------|--|--|-----------------|--|--|-----------------|--|--|-----------------|--|--|-----------------|--|--|-----------------|--|--|-----------------|--|--|-----------------|--|--|-----------------|--|--|-----------------|--|--|-----------------|--|--|-----------------|--|--|-----------------|--|--|-----------------|--|--|-----------------|--|--|-----------------|--|--|-----------------|--|--|-----------------|--|--|-----------------|--|--|-----------------|--|--|-----------------|--|--|-----------------|--|--|-----------------|--|--|-----------------|--|--|-----------------|--|--|-----------------|--|--|-----------------|--|--|-----------------|--|--|-----------------|--|--|-----------------|--|--|-----------------|--|--|-----------------|--|--|-----------------|--|--|-----------------|--|--|-----------------|--|--|-----------------|--|--|-----------------|--|--|-----------------|--|--|-----------------|--|--|-----------------|--|--|-----------------|--|--|-----------------|--|--|-----------------|--|--|-----------------|--|--|-----------------|--|--|-----------------|--|--|-----------------|--|--|-----------------|--|--|-----------------|--|--|-----------------|--|--|-----------------|--|--|-----------------|--|--|-----------------|--|--|-----------------|--|--|-----------------|--|--|-----------------|--|--|-----------------|--|--|-----------------|--|--|-----------------|--|--|-----------------|--|--|-----------------|--|--|-----------------|--|--|-----------------|--|--|-----------------|--|--|-----------------|--|--|-----------------|--|--|-----------------|--|--|-----------------|--|--|-----------------|--|--|-----------------|--|--|-----------------|--|--|-----------------|--|--|-----------------|--|--|-----------------|--|--|-----------------|--|--|-----------------|--|--|-----------------|--|--|-----------------|--|--|-----------------|--|--|-----------------|--|--|-----------------|--|--|-----------------|--|--|-----------------|--|--|-----------------|--|--|-----------------|--|--|-----------------|--|--|-----------------|--|--|-----------------|--|--|-----------------|--|--|-----------------|--|--|-----------------|--|--|-----------------|--|--|-----------------|--|--|-----------------|--|--|-----------------|--|--|-----------------|--|--|-----------------|--|--|-----------------|--|--|-----------------|--|--|-----------------|--|--|-----------------|--|--|-----------------|--|--|-----------------|--|--|-----------------|--|--|-----------------|--|--|-----------------|--|--|-----------------|--|--|-----------------|--|--|-----------------|--|--|-----------------|--|--|-----------------|--|--|-----------------|--|--|-----------------|--|--|-----------------|--|--|-----------------|--|--|-----------------|--|--|-----------------|--|--|-----------------|--|--|-----------------|--|--|-----------------|--|--|-----------------|--|--|-----------------|--|--|-----------------|--|--|-----------------|--|--|-----------------|--|--|-----------------|--|--|-----------------|--|--|-----------------|--|--|-----------------|--|--|-----------------|--|--|-----------------|--|--|-----------------|--|--|-----------------|--|--|-----------------|--|--|-----------------|--|--|-----------------|--|--|-----------------|--|--|-----------------|--|--|-----------------|--|--|-----------------|--|--|-----------------|--|--|-----------------|--|--|-----------------|--|--|-----------------|--|--|-----------------|--|--|-----------------|--|--|-----------------|--|--|-----------------|--|--|-----------------|--|--|-----------------|--|--|-----------------|--|--|-----------------|--|--|-----------------|--|--|-----------------|--|--|-----------------|--|--|-----------------|--|--|-----------------|--|--|-----------------|--|--|-----------------|--|--|-----------------|--|--|-----------------|--|--|-----------------|--|--|-----------------|--|--|-----------------|--|--|-----------------|--|--|-----------------|--|--|-----------------|--|--|-----------------|--|--|-----------------|--|--|-----------------|--|--|-----------------|--|--|-----------------|--|--|-----------------|--|--|-----------------|--|--|-----------------|--|--|-----------------|--|--|-----------------|--|--|-----------------|--|--|-----------------|--|--|-----------------|--|--|-----------------|--|--|-----------------|--|--|-----------------|--|--|-----------------|--|--|-----------------|--|--|-----------------|--|--|-----------------|--|--|-----------------|--|--|-----------------|--|--|-----------------|--|--|-----------------|--|--|-----------------|--|--|-----------------|--|--|-----------------|--|--|-----------------|--|--|-----------------|--|--|-----------------|--|--|-----------------|--|--|-----------------|--|--|-----------------|--|--|-----------------|--|--|-----------------|--|--|-----------------|--|--|-----------------|--|--|-----------------|--|--|-----------------|--|--|-----------------|--|--|-----------------|--|--|-----------------|--|--|-----------------|--|--|-----------------|--|--|-----------------|--|--|-----------------|--|--|-----------------|--|--|-----------------|--|--|-----------------|--|--|-----------------|--|--|-----------------|--|--|-----------------|--|--|-----------------|--|--|-----------------|--|--|-----------------|--|--|-----------------|--|--|-----------------|--|--|-----------------|--|--|-----------------|--|--|-----------------|--|--|-----------------|--|--|-----------------|--|--|-----------------|--|--|-----------------|--|--|-----------------|--|--|-----------------|--|--|-----------------|--|--|-----------------|--|--|-----------------|--|--|-----------------|--|--|-----------------|--|--|-----------------|--|--|-----------------|--|--|-----------------|--|--|-----------------|--|--|-----------------|--|--|-----------------|--|--|-----------------|--|--|-----------------|--|--|-----------------|--|--|-----------------|--|--|-----------------|--|--|-----------------|--|--|-----------------|--|--|-----------------|--|--|-----------------|--|--|-----------------|--|--|-----------------|--|--|-----------------|--|--|-----------------|--|--|-----------------|--|--|-----------------|--|--|-----------------|--|--|-----------------|--|--|-----------------|--|--|-----------------|--|--|-----------------|--|--|-----------------|--|--|-----------------|--|--|-----------------|--|--|-----------------|--|--|-----------------|--|--|-----------------|--|--|-----------------|--|--|-----------------|--|--|-----------------|--|--|-----------------|--|--|-----------------|--|--|-----------------|--|--|-----------------|--|--|-----------------|--|--|-----------------|--|--|-----------------|--|--|-----------------|--|--|-----------------|--|--|-----------------|--|--|-----------------|--|--|-----------------|--|--|-----------------|--|--|-----------------|--|--|-----------------|--|--|-----------------|--|--|-----------------|--|--|-----------------|--|--|-----------------|--|--|-----------------|--|--|-----------------|--|--|-----------------|--|--|-----------------|--|--|-----------------|--|--|-----------------|--|--|-----------------|--|--|-----------------|--|--|-----------------|--|--|-----------------|--|--|-----------------|--|--|-----------------|--|--|-----------------|--|--|-----------------|--|--|-----------------|--|--|-----------------|--|--|-----------------|--|--|-----------------|--|--|-----------------|--|--|-----------------|--|--|-----------------|--|--|-----------------|--|--|-----------------|--|--|-----------------|--|--|-----------------|--|--|-----------------|--|--|-----------------|--|--|-----------------|--|--|-----------------|--|--|-----------------|--|--|-----------------|--|--|-----------------|--|--|-----------------|--|--|-----------------|--|--|-----------------|--|--|-----------------|--|--|-----------------|--|--|-----------------|--|--|-----------------|--|--|-----------------|--|--|-----------------|--|--|-----------------|--|--|-----------------|--|--|-----------------|--|--|-----------------|--|--|-----------------|--|--|-----------------|--|--|-----------------|--|--|-----------------|--|--|-----------------|--|--|-----------------|--|--|-----------------|--|--|-----------------|--|--|-----------------|--|--|-----------------|--|--|-----------------|--|--|-----------------|--|--|-----------------|--|--|-----------------|--|--|-----------------|--|--|-----------------|--|--|-----------------|--|--|-----------------|--|--|-----------------|--|--|-----------------|--|--|-----------------|--|--|-----------------|--|--|-----------------|--|--|-----------------|--|--|-----------------|--|--|-----------------|--|--|-----------------|--|--|-----------------|--|--|-----------------|--|--|-----------------|--|--|-----------------|--|--|-----------------|--|--|-----------------|--|--|-----------------|--|--|-----------------|--|--|-----------------|--|--|-----------------|--|--|-----------------|--|--|-----------------|--|--|-----------------|--|--|-----------------|--|--|-----------------|--|--|-----------------|--|--|-----------------|--|--|-----------------|--|--|-----------------|--|--|-----------------|--|--|-----------------|--|--|-----------------|--|--|-----------------|--|--|-----------------|--|--|-----------------|--|--|-----------------|--|--|-----------------|--|--|-----------------|--|--|-----------------|--|--|-----------------|--|--|-----------------|--|--|-----------------|--|--|-----------------|--|--|-----------------|--|--|-----------------|--|--|-----------------|--|--|-----------------|--|--|-----------------|--|--|-----------------|--|--|-----------------|--|--|-----------------|--|--|-----------------|--|--|-----------------|--|--|-----------------|--|--|-----------------|--|--|-----------------|--|--|-----------------|--|--|-----------------|--|--|-----------------|--|--|-----------------|--|--|-----------------|--|--|-----------------|--|--|-----------------|--|--|-----------------|--|--|-----------------|--|--|-----------------|--|--|-----------------|--|--|-----------------|--|--|-----------------|--|--|-----------------|--|--|-----------------|--|--|-----------------|--|--|-----------------|--|--|-----------------|--|--|-----------------|--|--|-----------------|--|--|-----------------|--|--|-----------------|--|--|-----------------|--|--|-----------------|--|--|-----------------|--|--|-----------------|--|--|-----------------|--|--|-----------------|--|--|-----------------|--|--|-----------------|--|--|-----------------|--|--|-----------------|--|--|-----------------|--|--|-----------------|--|--|-----------------|--|--|-----------------|--|--|-----------------|--|--|-----------------|--|--|-----------------|--|--|-----------------|--|--|-----------------|--|--|-----------------|--|--|-----------------|--|--|-----------------|--|--|-----------------|--|--|-----------------|--|--|-----------------|--|--|-----------------|--|--|-----------------|--|--|-----------------|--|--|-----------------|--|--|-----------------|--|--|-----------------|--|--|-----------------|--|--|-----------------|--|--|-----------------|--|--|-----------------|--|--|-----------------|--|--|-----------------|--|--|-----------------|--|--|-----------------|--|--|-----------------|--|--|-----------------|--|--|-----------------|--|--|-----------------|--|--|-----------------|--|--|-----------------|--|--|-----------------|--|--|-----------------|--|--|-----------------|--|--|-----------------|--|--|-----------------|--|--|-----------------|--|--|-----------------|--|--|-----------------|--|--|-----------------|--|--|-----------------|--|--|-----------------|--|--|-----------------|--|--|-----------------|--|--|-----------------|--|--|-----------------|--|--|-----------------|--|--|-----------------|--|--|-----------------|--|--|-----------------|--|--|-----------------|--|--|-----------------|--|--|-----------------|--|--|-----------------|--|--|-----------------|--|--|-----------------|--|--|-----------------|--|--|-----------------|--|--|-----------------|--|--|-----------------|--|--|-----------------|--|--|-----------------|--|--|-----------------|--|--|-----------------|--|--|-----------------|--|--|-----------------|--|--|-----------------|--|--|-----------------|--|--|-----------------|--|--|-----------------|--|--|-----------------|--|--|-----------------|--|--|-----------------|--|--|-----------------|--|--|-----------------|--|--|-----------------|--|--|-----------------|--|--|-----------------|--|--|-----------------|--|--|-----------------|--|--|-----------------|--|--|-----------------|--|--|-----------------|--|--|-----------------|--|--|-----------------|--|--|-----------------|--|--|-----------------|--|--|-----------------|--|--|-----------------|--|--|-----------------|--|--|-----------------|--|--|-----------------|--|--|-----------------|--|--|-----------------|--|--|-----------------|--|--|-----------------|--|--|-----------------|--|--|-----------------|--|--|-----------------|--|--|-----------------|--|--|-----------------|--|--|-----------------|--|--|-----------------|--|--|-----------------|--|--|-----------------|--|--|-----------------|--|--|-----------------|--|--|-----------------|--|--|-----------------|--|--|-----------------|--|--|-----------------|--|--|-----------------|--|--|-----------------|--|--|-----------------|--|--|-----------------|--|--|-----------------|--|--|-----------------|--|--|-----------------|--|--|-----------------|--|--|-----------------|--|--|-----------------|--|--|-----------------|--|--|-----------------|--|--|-----------------|--|--|-----------------|--|--|-----------------|--|--|-----------------|--|--|-----------------|--|--|-----------------|--|--|-----------------|--|--|-----------------|--|--|-----------------|--|--|-----------------|--|--|-----------------|--|--|-----------------|--|--|-----------------|--|--|-----------------|--|--|-----------------|--|--|-----------------|--|--|-----------------|--|--|-----------------|--|--|-----------------|--|--|-----------------|--|--|-----------------|--|--|-----------------|--|--|-----------------|--|--|-----------------|--|--|-----------------|--|--|-----------------|--|--|-----------------|--|--|-----------------|--|--|-----------------|--|--|-----------------|--|--|-----------------|--|--|-----------------|--|--|-----------------|--|--|-----------------|--|--|-----------------|--|--|-----------------|--|--|-----------------|--|--|-----------------|--|--|-----------------|--|--|-----------------|--|--|-----------------|--|--|-----------------|--|--|-----------------|--|--|-----------------|--|--|-----------------|--|--|-----------------|--|--|-----------------|--|--|-----------------|--|--|-----------------|--|--|-----------------|--|--|-----------------|--|--|-----------------|--|--|-----------------|--|--|-----------------|--|--|-----------------|--|--|-----------------|--|--|-----------------|--|--|-----------------|--|--|-----------------|--|--|-----------------|--|--|-----------------|--|--|-----------------|--|--|-----------------|--|--|-----------------|--|--|-----------------|--|--|-----------------|--|--|-----------------|--|--|-----------------|--|--|-----------------|--|--|-----------------|--|--|-----------------|--|--|-----------------|--|--|-----------------|--|--|-----------------|--|--|-----------------|--|--|-----------------|--|--|-----------------|--|--|-----------------|--|--|-----------------|--|--|-----------------|--|--|-----------------|--|--|-----------------|--|--|-----------------|--|--|-----------------|--|--|-----------------|--|--|-----------------|--|--|-----------------|--|--|-----------------|--|--|-----------------|--|--|-----------------|--|--|-----------------|--|--|-----------------|--|--|-----------------|--|--|-----------------|--|--|-----------------|--|--|-----------------|--|--|-----------------|--|--|-----------------|--|--|-----------------|--|--|-----------------|--|--|-----------------|--|--|-----------------|--|--|-----------------|--|--|-----------------|--|--|-----------------|--|--|-----------------|--|--|-----------------|--|--|-----------------|--|--|-----------------|--|--|-----------------|--|--|-----------------|--|--|-----------------|--|--|-----------------|--|--|-----------------|--|--|-----------------|--|--|-----------------|--|--|-----------------|--|--|-----------------|--|--|-----------------|--|--|-----------------|--|--|-----------------|--|--|-----------------|--|--|-----------------|--|--|-----------------|--|--|-----------------|--|--|-----------------|--|--|-----------------|--|--|-----------------|--|--|-----------------|--|--|-----------------|--|--|------------------|--|--|------------------|--|--|------------------|--|--|------------------|--|--|------------------|--|--|------------------|--|--|------------------|--|--|------------------|--|--|------------------|--|--|------------------|--|--|------------------|--|--|------------------|--|--|------------------|--|--|------------------|--|--|------------------|--|--|------------------|--|--|------------------|--|--|------------------|--|--|------------------|--|--|------------------|--|--|------------------|--|--|------------------|--|--|------------------|--|--|------------------|--|--|------------------|--|--|------------------|--|--|------------------|--|--|------------------|--|--|------------------|--|--|------------------|--|--|------------------|--|--|------------------|--|--|------------------|--|--|------------------|--|--|------------------|--|--|------------------|--|--|------------------|--|--|------------------|--|--|------------------|--|--|------------------|--|--|------------------|--|--|------------------|--|--|------------------|--|--|------------------|--|--|
|-----------------|--|--|-----------------|--|--|-----------------|--|--|-----------------|--|--|-----------------|--|--|-----------------|--|--|-----------------|--|--|-----------------|--|--|-----------------|--|--|-----------------|--|--|-----------------|--|--|-----------------|--|--|-----------------|--|--|-----------------|--|--|-----------------|--|--|-----------------|--|--|-----------------|--|--|-----------------|--|--|-----------------|--|--|-----------------|--|--|-----------------|--|--|-----------------|--|--|-----------------|--|--|-----------------|--|--|-----------------|--|--|-----------------|--|--|-----------------|--|--|-----------------|--|--|-----------------|--|--|-----------------|--|--|-----------------|--|--|-----------------|--|--|-----------------|--|--|-----------------|--|--|-----------------|--|--|-----------------|--|--|-----------------|--|--|-----------------|--|--|-----------------|--|--|-----------------|--|--|-----------------|--|--|-----------------|--|--|-----------------|--|--|-----------------|--|--|-----------------|--|--|-----------------|--|--|-----------------|--|--|-----------------|--|--|-----------------|--|--|-----------------|--|--|-----------------|--|--|-----------------|--|--|-----------------|--|--|-----------------|--|--|-----------------|--|--|-----------------|--|--|-----------------|--|--|-----------------|--|--|-----------------|--|--|-----------------|--|--|-----------------|--|--|-----------------|--|--|-----------------|--|--|-----------------|--|--|-----------------|--|--|-----------------|--|--|-----------------|--|--|-----------------|--|--|-----------------|--|--|-----------------|--|--|-----------------|--|--|-----------------|--|--|-----------------|--|--|-----------------|--|--|-----------------|--|--|-----------------|--|--|-----------------|--|--|-----------------|--|--|-----------------|--|--|-----------------|--|--|-----------------|--|--|-----------------|--|--|-----------------|--|--|-----------------|--|--|-----------------|--|--|-----------------|--|--|-----------------|--|--|-----------------|--|--|-----------------|--|--|-----------------|--|--|-----------------|--|--|-----------------|--|--|-----------------|--|--|-----------------|--|--|-----------------|--|--|-----------------|--|--|-----------------|--|--|-----------------|--|--|-----------------|--|--|-----------------|--|--|-----------------|--|--|-----------------|--|--|-----------------|--|--|-----------------|--|--|-----------------|--|--|-----------------|--|--|-----------------|--|--|-----------------|--|--|-----------------|--|--|-----------------|--|--|-----------------|--|--|-----------------|--|--|-----------------|--|--|-----------------|--|--|-----------------|--|--|-----------------|--|--|-----------------|--|--|-----------------|--|--|-----------------|--|--|-----------------|--|--|-----------------|--|--|-----------------|--|--|-----------------|--|--|-----------------|--|--|-----------------|--|--|-----------------|--|--|-----------------|--|--|-----------------|--|--|-----------------|--|--|-----------------|--|--|-----------------|--|--|-----------------|--|--|-----------------|--|--|-----------------|--|--|-----------------|--|--|-----------------|--|--|-----------------|--|--|-----------------|--|--|-----------------|--|--|-----------------|--|--|-----------------|--|--|-----------------|--|--|-----------------|--|--|-----------------|--|--|-----------------|--|--|-----------------|--|--|-----------------|--|--|-----------------|--|--|-----------------|--|--|-----------------|--|--|-----------------|--|--|-----------------|--|--|-----------------|--|--|-----------------|--|--|-----------------|--|--|-----------------|--|--|-----------------|--|--|-----------------|--|--|-----------------|--|--|-----------------|--|--|-----------------|--|--|-----------------|--|--|-----------------|--|--|-----------------|--|--|-----------------|--|--|-----------------|--|--|-----------------|--|--|-----------------|--|--|-----------------|--|--|-----------------|--|--|-----------------|--|--|-----------------|--|--|-----------------|--|--|-----------------|--|--|-----------------|--|--|-----------------|--|--|-----------------|--|--|-----------------|--|--|-----------------|--|--|-----------------|--|--|-----------------|--|--|-----------------|--|--|-----------------|--|--|-----------------|--|--|-----------------|--|--|-----------------|--|--|-----------------|--|--|-----------------|--|--|-----------------|--|--|-----------------|--|--|-----------------|--|--|-----------------|--|--|-----------------|--|--|-----------------|--|--|-----------------|--|--|-----------------|--|--|-----------------|--|--|-----------------|--|--|-----------------|--|--|-----------------|--|--|-----------------|--|--|-----------------|--|--|-----------------|--|--|-----------------|--|--|-----------------|--|--|-----------------|--|--|-----------------|--|--|-----------------|--|--|-----------------|--|--|-----------------|--|--|-----------------|--|--|-----------------|--|--|-----------------|--|--|-----------------|--|--|-----------------|--|--|-----------------|--|--|-----------------|--|--|-----------------|--|--|-----------------|--|--|-----------------|--|--|-----------------|--|--|-----------------|--|--|-----------------|--|--|-----------------|--|--|-----------------|--|--|-----------------|--|--|-----------------|--|--|-----------------|--|--|-----------------|--|--|-----------------|--|--|-----------------|--|--|-----------------|--|--|-----------------|--|--|-----------------|--|--|-----------------|--|--|-----------------|--|--|-----------------|--|--|-----------------|--|--|-----------------|--|--|-----------------|--|--|-----------------|--|--|-----------------|--|--|-----------------|--|--|-----------------|--|--|-----------------|--|--|-----------------|--|--|-----------------|--|--|-----------------|--|--|-----------------|--|--|-----------------|--|--|-----------------|--|--|-----------------|--|--|-----------------|--|--|-----------------|--|--|-----------------|--|--|-----------------|--|--|-----------------|--|--|-----------------|--|--|-----------------|--|--|-----------------|--|--|-----------------|--|--|-----------------|--|--|-----------------|--|--|-----------------|--|--|-----------------|--|--|-----------------|--|--|-----------------|--|--|-----------------|--|--|-----------------|--|--|-----------------|--|--|-----------------|--|--|-----------------|--|--|-----------------|--|--|-----------------|--|--|-----------------|--|--|-----------------|--|--|-----------------|--|--|-----------------|--|--|-----------------|--|--|-----------------|--|--|-----------------|--|--|-----------------|--|--|-----------------|--|--|-----------------|--|--|-----------------|--|--|-----------------|--|--|-----------------|--|--|-----------------|--|--|-----------------|--|--|-----------------|--|--|-----------------|--|--|-----------------|--|--|-----------------|--|--|-----------------|--|--|-----------------|--|--|-----------------|--|--|-----------------|--|--|-----------------|--|--|-----------------|--|--|-----------------|--|--|-----------------|--|--|-----------------|--|--|-----------------|--|--|-----------------|--|--|-----------------|--|--|-----------------|--|--|-----------------|--|--|-----------------|--|--|-----------------|--|--|-----------------|--|--|-----------------|--|--|-----------------|--|--|-----------------|--|--|-----------------|--|--|-----------------|--|--|-----------------|--|--|-----------------|--|--|-----------------|--|--|-----------------|--|--|-----------------|--|--|-----------------|--|--|-----------------|--|--|-----------------|--|--|-----------------|--|--|-----------------|--|--|-----------------|--|--|-----------------|--|--|-----------------|--|--|-----------------|--|--|-----------------|--|--|-----------------|--|--|-----------------|--|--|-----------------|--|--|-----------------|--|--|-----------------|--|--|-----------------|--|--|-----------------|--|--|-----------------|--|--|-----------------|--|--|-----------------|--|--|-----------------|--|--|-----------------|--|--|-----------------|--|--|-----------------|--|--|-----------------|--|--|-----------------|--|--|-----------------|--|--|-----------------|--|--|-----------------|--|--|-----------------|--|--|-----------------|--|--|-----------------|--|--|-----------------|--|--|-----------------|--|--|-----------------|--|--|-----------------|--|--|-----------------|--|--|-----------------|--|--|-----------------|--|--|-----------------|--|--|-----------------|--|--|-----------------|--|--|-----------------|--|--|-----------------|--|--|-----------------|--|--|-----------------|--|--|-----------------|--|--|-----------------|--|--|-----------------|--|--|-----------------|--|--|-----------------|--|--|-----------------|--|--|-----------------|--|--|-----------------|--|--|-----------------|--|--|-----------------|--|--|-----------------|--|--|-----------------|--|--|-----------------|--|--|-----------------|--|--|-----------------|--|--|-----------------|--|--|-----------------|--|--|-----------------|--|--|-----------------|--|--|-----------------|--|--|-----------------|--|--|-----------------|--|--|-----------------|--|--|-----------------|--|--|-----------------|--|--|-----------------|--|--|-----------------|--|--|-----------------|--|--|-----------------|--|--|-----------------|--|--|-----------------|--|--|-----------------|--|--|-----------------|--|--|-----------------|--|--|-----------------|--|--|-----------------|--|--|-----------------|--|--|-----------------|--|--|-----------------|--|--|-----------------|--|--|-----------------|--|--|-----------------|--|--|-----------------|--|--|-----------------|--|--|-----------------|--|--|-----------------|--|--|-----------------|--|--|-----------------|--|--|-----------------|--|--|-----------------|--|--|-----------------|--|--|-----------------|--|--|-----------------|--|--|-----------------|--|--|-----------------|--|--|-----------------|--|--|-----------------|--|--|-----------------|--|--|-----------------|--|--|-----------------|--|--|-----------------|--|--|-----------------|--|--|-----------------|--|--|-----------------|--|--|-----------------|--|--|-----------------|--|--|-----------------|--|--|-----------------|--|--|-----------------|--|--|-----------------|--|--|-----------------|--|--|-----------------|--|--|-----------------|--|--|-----------------|--|--|-----------------|--|--|-----------------|--|--|-----------------|--|--|-----------------|--|--|-----------------|--|--|-----------------|--|--|-----------------|--|--|-----------------|--|--|-----------------|--|--|-----------------|--|--|-----------------|--|--|-----------------|--|--|-----------------|--|--|-----------------|--|--|-----------------|--|--|-----------------|--|--|-----------------|--|--|-----------------|--|--|-----------------|--|--|-----------------|--|--|-----------------|--|--|-----------------|--|--|-----------------|--|--|-----------------|--|--|-----------------|--|--|-----------------|--|--|-----------------|--|--|-----------------|--|--|-----------------|--|--|-----------------|--|--|-----------------|--|--|-----------------|--|--|-----------------|--|--|-----------------|--|--|-----------------|--|--|-----------------|--|--|-----------------|--|--|-----------------|--|--|-----------------|--|--|-----------------|--|--|-----------------|--|--|-----------------|--|--|-----------------|--|--|-----------------|--|--|-----------------|--|--|-----------------|--|--|-----------------|--|--|-----------------|--|--|-----------------|--|--|-----------------|--|--|-----------------|--|--|-----------------|--|--|-----------------|--|--|-----------------|--|--|-----------------|--|--|-----------------|--|--|-----------------|--|--|-----------------|--|--|-----------------|--|--|-----------------|--|--|-----------------|--|--|-----------------|--|--|-----------------|--|--|-----------------|--|--|-----------------|--|--|-----------------|--|--|-----------------|--|--|-----------------|--|--|-----------------|--|--|-----------------|--|--|-----------------|--|--|-----------------|--|--|-----------------|--|--|-----------------|--|--|-----------------|--|--|-----------------|--|--|-----------------|--|--|-----------------|--|--|-----------------|--|--|-----------------|--|--|-----------------|--|--|-----------------|--|--|-----------------|--|--|-----------------|--|--|-----------------|--|--|-----------------|--|--|-----------------|--|--|-----------------|--|--|-----------------|--|--|-----------------|--|--|-----------------|--|--|-----------------|--|--|-----------------|--|--|-----------------|--|--|-----------------|--|--|-----------------|--|--|-----------------|--|--|-----------------|--|--|-----------------|--|--|-----------------|--|--|-----------------|--|--|-----------------|--|--|-----------------|--|--|-----------------|--|--|-----------------|--|--|-----------------|--|--|-----------------|--|--|-----------------|--|--|-----------------|--|--|-----------------|--|--|-----------------|--|--|-----------------|--|--|-----------------|--|--|-----------------|--|--|-----------------|--|--|-----------------|--|--|-----------------|--|--|-----------------|--|--|-----------------|--|--|-----------------|--|--|-----------------|--|--|-----------------|--|--|-----------------|--|--|-----------------|--|--|-----------------|--|--|-----------------|--|--|-----------------|--|--|-----------------|--|--|-----------------|--|--|-----------------|--|--|-----------------|--|--|-----------------|--|--|-----------------|--|--|-----------------|--|--|-----------------|--|--|-----------------|--|--|-----------------|--|--|-----------------|--|--|-----------------|--|--|-----------------|--|--|-----------------|--|--|-----------------|--|--|-----------------|--|--|-----------------|--|--|-----------------|--|--|-----------------|--|--|-----------------|--|--|-----------------|--|--|-----------------|--|--|-----------------|--|--|-----------------|--|--|-----------------|--|--|-----------------|--|--|-----------------|--|--|-----------------|--|--|-----------------|--|--|-----------------|--|--|-----------------|--|--|-----------------|--|--|-----------------|--|--|-----------------|--|--|-----------------|--|--|-----------------|--|--|-----------------|--|--|-----------------|--|--|-----------------|--|--|-----------------|--|--|-----------------|--|--|-----------------|--|--|-----------------|--|--|-----------------|--|--|-----------------|--|--|-----------------|--|--|-----------------|--|--|-----------------|--|--|-----------------|--|--|-----------------|--|--|-----------------|--|--|-----------------|--|--|-----------------|--|--|-----------------|--|--|-----------------|--|--|-----------------|--|--|-----------------|--|--|-----------------|--|--|-----------------|--|--|-----------------|--|--|-----------------|--|--|-----------------|--|--|-----------------|--|--|-----------------|--|--|-----------------|--|--|-----------------|--|--|-----------------|--|--|-----------------|--|--|-----------------|--|--|-----------------|--|--|-----------------|--|--|-----------------|--|--|-----------------|--|--|-----------------|--|--|-----------------|--|--|-----------------|--|--|-----------------|--|--|-----------------|--|--|-----------------|--|--|-----------------|--|--|-----------------|--|--|-----------------|--|--|-----------------|--|--|-----------------|--|--|-----------------|--|--|-----------------|--|--|-----------------|--|--|-----------------|--|--|-----------------|--|--|-----------------|--|--|-----------------|--|--|-----------------|--|--|-----------------|--|--|-----------------|--|--|-----------------|--|--|-----------------|--|--|-----------------|--|--|-----------------|--|--|-----------------|--|--|-----------------|--|--|-----------------|--|--|-----------------|--|--|-----------------|--|--|-----------------|--|--|-----------------|--|--|-----------------|--|--|-----------------|--|--|-----------------|--|--|-----------------|--|--|-----------------|--|--|-----------------|--|--|-----------------|--|--|-----------------|--|--|-----------------|--|--|-----------------|--|--|-----------------|--|--|-----------------|--|--|-----------------|--|--|-----------------|--|--|-----------------|--|--|-----------------|--|--|-----------------|--|--|-----------------|--|--|-----------------|--|--|-----------------|--|--|-----------------|--|--|-----------------|--|--|-----------------|--|--|-----------------|--|--|-----------------|--|--|-----------------|--|--|-----------------|--|--|-----------------|--|--|-----------------|--|--|-----------------|--|--|-----------------|--|--|-----------------|--|--|-----------------|--|--|-----------------|--|--|-----------------|--|--|-----------------|--|--|-----------------|--|--|-----------------|--|--|-----------------|--|--|-----------------|--|--|-----------------|--|--|-----------------|--|--|-----------------|--|--|-----------------|--|--|-----------------|--|--|-----------------|--|--|-----------------|--|--|-----------------|--|--|-----------------|--|--|-----------------|--|--|-----------------|--|--|-----------------|--|--|-----------------|--|--|-----------------|--|--|-----------------|--|--|-----------------|--|--|-----------------|--|--|-----------------|--|--|-----------------|--|--|-----------------|--|--|-----------------|--|--|-----------------|--|--|-----------------|--|--|-----------------|--|--|-----------------|--|--|-----------------|--|--|-----------------|--|--|-----------------|--|--|-----------------|--|--|-----------------|--|--|-----------------|--|--|-----------------|--|--|-----------------|--|--|-----------------|--|--|-----------------|--|--|-----------------|--|--|-----------------|--|--|-----------------|--|--|-----------------|--|--|-----------------|--|--|-----------------|--|--|-----------------|--|--|-----------------|--|--|-----------------|--|--|-----------------|--|--|-----------------|--|--|-----------------|--|--|-----------------|--|--|-----------------|--|--|-----------------|--|--|-----------------|--|--|-----------------|--|--|-----------------|--|--|-----------------|--|--|-----------------|--|--|-----------------|--|--|-----------------|--|--|-----------------|--|--|-----------------|--|--|-----------------|--|--|-----------------|--|--|-----------------|--|--|-----------------|--|--|-----------------|--|--|-----------------|--|--|-----------------|--|--|-----------------|--|--|-----------------|--|--|-----------------|--|--|-----------------|--|--|-----------------|--|--|-----------------|--|--|-----------------|--|--|-----------------|--|--|-----------------|--|--|-----------------|--|--|-----------------|--|--|-----------------|--|--|-----------------|--|--|-----------------|--|--|-----------------|--|--|-----------------|--|--|-----------------|--|--|-----------------|--|--|-----------------|--|--|-----------------|--|--|-----------------|--|--|-----------------|--|--|-----------------|--|--|-----------------|--|--|-----------------|--|--|-----------------|--|--|-----------------|--|--|-----------------|--|--|-----------------|--|--|-----------------|--|--|-----------------|--|--|-----------------|--|--|-----------------|--|--|-----------------|--|--|-----------------|--|--|-----------------|--|--|-----------------|--|--|-----------------|--|--|-----------------|--|--|-----------------|--|--|-----------------|--|--|-----------------|--|--|-----------------|--|--|-----------------|--|--|-----------------|--|--|-----------------|--|--|-----------------|--|--|-----------------|--|--|-----------------|--|--|-----------------|--|--|-----------------|--|--|-----------------|--|--|-----------------|--|--|-----------------|--|--|-----------------|--|--|-----------------|--|--|-----------------|--|--|-----------------|--|--|-----------------|--|--|------------------|--|--|------------------|--|--|------------------|--|--|------------------|--|--|------------------|--|--|------------------|--|--|------------------|--|--|------------------|--|--|------------------|--|--|------------------|--|--|------------------|--|--|------------------|--|--|------------------|--|--|------------------|--|--|------------------|--|--|------------------|--|--|------------------|--|--|------------------|--|--|------------------|--|--|------------------|--|--|------------------|--|--|------------------|--|--|------------------|--|--|------------------|--|--|------------------|--|--|------------------|--|--|------------------|--|--|------------------|--|--|------------------|--|--|------------------|--|--|------------------|--|--|------------------|--|--|------------------|--|--|------------------|--|--|------------------|--|--|------------------|--|--|------------------|--|--|------------------|--|--|------------------|--|--|------------------|--|--|------------------|--|--|------------------|--|--|------------------|--|--|------------------|--|--|





File: ESM\_10 (Online Resource)

Title: Comparison of Multivariate Molecular Analyses of Pediatric Diffuse Intrinsic Pontine Glioma Reveals Distinct Molecular Subtypes

Journal: Acta Neuropathologica

Authors: Amanda M. Stransik, Madhuri Kumbhakar, Kendall Snyder, Sidicki Yavuzli, Joe Devenney,

Brennan Harmon, Jordan Hall, Eric H. Rubie, Ping An, Melanie Weingart, Brian Ross, Sarah Mudge, Roger J. Packer, Javad Nazarian

Corresponding Author:

Javad Nazarian, Children's National Medical Center, Center for Genetic Medicine,

111 Michigan Ave., NW, Washington DC, 20010

Phone: 202-476-6022 Fax: 202-476-6014

Email: J.Nazarian@CNMC.org

| Gene ID            |  | FoldChange[106] |                       |               |              | FoldChange[111]       |               |              |                       | FoldChange[112] |              |                       |               | FoldChange[121] |                       |               |              | FoldChange[137]       |               |              |                       | FoldChange[153] |              |                       |               | FoldChange[157] |                       |               |              | FoldChange[165]       |               |  |  |
|--------------------|--|-----------------|-----------------------|---------------|--------------|-----------------------|---------------|--------------|-----------------------|-----------------|--------------|-----------------------|---------------|-----------------|-----------------------|---------------|--------------|-----------------------|---------------|--------------|-----------------------|-----------------|--------------|-----------------------|---------------|-----------------|-----------------------|---------------|--------------|-----------------------|---------------|--|--|
|                    |  | p-value[106]    | MeanRatio (106 vs. n) | (Description) | p-value[111] | MeanRatio (111 vs. n) | (Description) | p-value[112] | MeanRatio (112 vs. n) | (Description)   | p-value[121] | MeanRatio (121 vs. n) | (Description) | p-value[137]    | MeanRatio (137 vs. n) | (Description) | p-value[153] | MeanRatio (153 vs. n) | (Description) | p-value[157] | MeanRatio (157 vs. n) | (Description)   | p-value[165] | MeanRatio (165 vs. n) | (Description) | p-value[170]    | MeanRatio (170 vs. n) | (Description) | p-value[171] | MeanRatio (171 vs. n) | (Description) |  |  |
| FC0049937.0        |  | -2.48902        | -4.71767              | 106 down vs n | 0.84026      | 8.06026               | 111 up vs n   | 0.14777      | 1.47717               | 112 up vs n     | -1.9748      | 1.9748                | 121 up vs n   | 0.081349        | -1.19977              | 137 down vs n | -0.12782     | -5.7831               | 153 down vs n | -0.12305     | -6.12005              | 157 up vs n     | 0.28538      | -3.50216              | 165 down vs n | 0.43431         | -11.7143              | 170 up vs n   | 0.28538      | -3.50216              | 171 up vs n   |  |  |
| FC0049940.0        |  | -2.47493        | -4.71767              | 106 up vs n   | 7.10076      | 7.10076               | 111 down vs n | -0.035309    | -28.3544              | 112 down vs n   | -0.57791     | -3.77791              | 121 up vs n   | 0.048572        | -2.47175              | 137 up vs n   | 1.40645      | 1.20947               | 153 up vs n   | 1.60289      | 1.60289               | 157 down vs n   | -0.000987    | -2.77058              | 165 down vs n | 4.42415         | 73.3465               | 170 up vs n   | 4.42415      | 73.3465               | 171 up vs n   |  |  |
| FC0049941.0        |  | -2.48902        | -4.71767              | 106 down vs n | 0.84026      | 8.06026               | 111 up vs n   | -0.040064    | -1.06376              | 112 up vs n     | -0.57791     | -3.77791              | 121 up vs n   | 0.048572        | -2.47175              | 137 up vs n   | 1.40645      | 1.20947               | 153 up vs n   | 1.60289      | 1.60289               | 157 down vs n   | -0.000987    | -2.77058              | 165 down vs n | 4.42415         | 73.3465               | 170 up vs n   | 4.42415      | 73.3465               | 171 up vs n   |  |  |
| FC0049941.5.661.41 |  | 1.17372         | 1.73712               | 106 down vs n | -1.16423     | -1.16423              | 111 up vs n   | -0.16935     | -1.6935               | 112 down vs n   | -0.25353     | -2.5353               | 121 up vs n   | 0.101282        | 1.01282               | 137 down vs n | -0.126719    | -9.79205              | 153 down vs n | 1.11843      | 0.589693              | 157 down vs n   | 0.589693     | 5.89693               | 165 down vs n | 5.89693         | 58.9693               | 170 up vs n   | 5.89693      | 58.9693               | 171 up vs n   |  |  |
| FC0049942.0        |  | 3.89524         | 3.89524               | 106 up vs n   | 0.65672      | 6.56712               | 111 up vs n   | -0.109012    | 0.17028               | 112 down vs n   | -0.20798     | -2.0798               | 121 up vs n   | 0.044068        | -2.7022               | 137 down vs n | 0.044068     | -2.7022               | 153 up vs n   | 0.044068     | -2.7022               | 157 down vs n   | -0.18728     | -5.1396               | 165 down vs n | 1.76841         | 57.1648               | 170 up vs n   | 1.76841      | 57.1648               | 171 up vs n   |  |  |
| FC0049943.0        |  | -2.48902        | -4.71767              | 106 down vs n | 0.84026      | 8.06026               | 111 up vs n   | -0.032719    | -1.09444              | 112 up vs n     | -0.57791     | -3.77791              | 121 up vs n   | 0.048572        | -2.47175              | 137 up vs n   | 1.40645      | 1.20947               | 153 up vs n   | 1.60289      | 1.60289               | 157 down vs n   | -0.000987    | -2.77058              | 165 down vs n | 4.42415         | 73.3465               | 170 up vs n   | 4.42415      | 73.3465               | 171 up vs n   |  |  |
| FC0049945.0        |  | -0.221937       | -4.50575              | 106 down vs n | -0.089536    | -1.04182              | 111 down vs n | 0.053114     | -1.04919              | 112 down vs n   | -0.158194    | -3.21315              | 121 down vs n | 0.71495         | 1.71495               | 137 up vs n   | -0.555418    | -1.80044              | 153 down vs n | 0.091664     | -2.55328              | 157 down vs n   | 0.091664     | -2.55328              | 165 down vs n | 2.58615         | 62.7755               | 170 up vs n   | 2.58615      | 62.7755               | 171 up vs n   |  |  |
| FC0049946.0        |  | 0.23459         | -4.26639              | 106 down vs n | 0.297355     | 2.97355               | 111 up vs n   | -0.78388     | 5.78388               | 112 up vs n     | -0.070856    | -1.0874               | 121 down vs n | 0.045426        | -2.2165               | 137 down vs n | 0.129092     | 2.02973               | 153 up vs n   | -0.15478     | -1.5478               | 157 up vs n     | -0.15478     | -1.5478               | 165 down vs n | 4.55567         | 78.8219               | 170 up vs n   | 4.55567      | 78.8219               | 171 up vs n   |  |  |
| FC0049947.0        |  | -0.179919       | -4.50575              | 106 down vs n | -0.071791    | -1.04919              | 111 down vs n | -0.179919    | -1.04919              | 112 down vs n   | -0.179919    | -1.04919              | 121 down vs n | -0.179919       | -1.04919              | 137 down vs n | -0.179919    | -1.04919              | 153 down vs n | -0.179919    | -1.04919              | 157 down vs n   | -0.179919    | -1.04919              | 165 down vs n | 2.58615         | 62.7755               | 170 up vs n   | 2.58615      | 62.7755               | 171 up vs n   |  |  |
| FC0049947.0        |  | 0.0927314       | -10.7811              | 106 down vs n | 0.0927314    | -10.7811              | 111 down vs n | 0.0927314    | -10.7811              | 112 down vs n   | 0.0927314    | -10.7811              | 121 down vs n | 0.0927314       | -10.7811              | 137 down vs n | 0.0927314    | -10.7811              | 153 down vs n | 0.0927314    | -10.7811              | 157 down vs n   | 0.0927314    | -10.7811              | 165 down vs n | 2.58615         | 62.7755               | 170 up vs n   | 2.58615      | 62.7755               | 171 up vs n   |  |  |
| FC0049951.0        |  | 0.0417158       | -23.712               | 106 down vs n | -0.0038856   | -25.361               | 111 down vs n | -0.282408    | -5.54097              | 112 down vs n   | -0.7131      | -7.131                | 121 up vs n   | 0.142518        | 1.42518               | 137 up vs n   | 0.142518     | 1.42518               | 153 up vs n   | 0.091311     | -1.51715              | 157 down vs n   | 0.091311     | -1.51715              | 165 down vs n | 2.1115          | 12.8113               | 170 up vs n   | 2.1115       | 12.8113               | 171 up vs n   |  |  |
| FC0049952.0        |  | 0.188204        | -5.1337               | 106 down vs n | 0.28167      | 2.8167                | 111 up vs n   | -0.78388     | 5.78388               | 112 up vs n     | -0.070856    | -1.0874               | 121 down vs n | 0.045426        | -2.2165               | 137 down vs n | 0.129092     | 2.02973               | 153 up vs n   | -0.15478     | -1.5478               | 157 up vs n     | -0.15478     | -1.5478               | 165 down vs n | 4.55567         | 78.8219               | 170 up vs n   | 4.55567      | 78.8219               | 171 up vs n   |  |  |
| FC0049953.0        |  | -0.000987       | -2.77058              | 106 down vs n | -0.000987    | -2.77058              | 111 down vs n | -0.000987    | -2.77058              | 112 down vs n   | -0.000987    | -2.77058              | 121 down vs n | -0.000987       | -2.77058              | 137 down vs n | -0.000987    | -2.77058              | 153 down vs n | -0.000987    | -2.77058              | 157 down vs n   | -0.000987    | -2.77058              | 165 down vs n | 4.42415         | 73.3465               | 170 up vs n   | 4.42415      | 73.3465               | 171 up vs n   |  |  |
| FC0049956.0        |  | 0.19642         | -7.1349               | 106 down vs n | 0.20054      | 2.0054                | 111 up vs n   | 0.20054      | 2.0054                | 112 up vs n     | 0.20054      | 2.0054                | 121 up vs n   | 0.20054         | 2.0054                | 137 up vs n   | 0.20054      | 2.0054                | 153 up vs n   | 0.20054      | 2.0054                | 157 down vs n   | 0.20054      | 2.0054                | 165 down vs n | 2.58615         | 62.7755               | 170 up vs n   | 2.58615      | 62.7755               | 171 up vs n   |  |  |
| FC0049963.0        |  | -0.96742        | -1.03686              | 106 down vs n | 0.790328     | 1.2653                | 111 down vs n | 0.790328     | 1.2653                | 112 down vs n   | 0.790328     | 1.2653                | 121 down vs n | 0.790328        | 1.2653                | 137 down vs n | 0.790328     | 1.2653                | 153 down vs n | 0.790328     | 1.2653                | 157 down vs n   | 0.790328     | 1.2653                | 165 down vs n | 1.06615         | 12.7592               | 170 up vs n   | 1.06615      | 12.7592               | 171 up vs n   |  |  |
| FC0049965.0        |  | -1.48008        | -1.48008              | 106 down vs n | 0.292794     | -1.47326              | 111 down vs n | 0.292794     | -1.47326              | 112 down vs n   | 0.292794     | -1.47326              | 121 down vs n | 0.292794        | -1.47326              | 137 down vs n | 0.292794     | -1.47326              | 153 down vs n | 0.292794     | -1.47326              | 157 down vs n   | 0.292794     | -1.47326              | 165 down vs n | 5.89693         | 58.9693               | 170 up vs n   | 5.89693      | 58.9693               | 171 up vs n   |  |  |
| FC0049970.0        |  | 0.0075168       | -1.7298               | 106 down vs n | 0.791757     | -2.1719               | 111 down vs n | 0.791757     | -2.1719               | 112 down vs n   | 0.791757     | -2.1719               | 121 down vs n | 0.791757        | -2.1719               | 137 down vs n | 0.791757     | -2.1719               | 153 down vs n | 0.791757     | -2.1719               | 157 down vs n   | 0.791757     | -2.1719               | 165 down vs n | 3.64615         | 47.2758               | 170 up vs n   | 3.64615      | 47.2758               | 171 up vs n   |  |  |
| FC0049971.0        |  | 0.150474        | -1.9734               | 106 down vs n | 0.645089     | -6.45089              | 111 up vs n   | 0.645089     | -6.45089              | 112 up vs n     | 0.645089     | -6.45089              | 121 up vs n   | 0.645089        | -6.45089              | 137 up vs n   | 0.645089     | -6.45089              | 153 up vs n   | 0.645089     | -6.45089              | 157 up vs n     | 0.645089     | -6.45089              | 165 up vs n   | 6.9845          | 16.7211               | 170 up vs n   | 6.9845       | 16.7211               | 171 up vs n   |  |  |
| FC0049972.0        |  | -0.150474       | -1.9734               | 106 down vs n | 0.645089     | -6.45089              | 111 up vs n   | 0.645089     | -6.45089              | 112 up vs n     | 0.645089     | -6.45089              | 121 up vs n   | 0.645089        | -6.45089              | 137 up vs n   | 0.645089     | -6.45089              | 153 up vs n   | 0.645089     | -6.45089              | 157 up vs n     | 0.645089     | -6.45089              | 165 up vs n   | 6.9845          | 16.7211               | 170 up vs n   | 6.9845       | 16.7211               | 171 up vs n   |  |  |
| FC0049975.0        |  | 0.682109        | -1.46646              | 106 down vs n | -2.85182     | -2.85182              | 111 up vs n   | -2.85182     | -2.85182              | 112 up vs n     | -2.85182     | -2.85182              | 121 up vs n   | -2.85182        | -2.85182              | 137 up vs n   | -2.85182     | -2.85182              | 153 down vs n | 1.71815      | 1.71815               | 157 up vs n     | 1.71815      | 1.71815               | 165 up vs n   | 5.1978          | 5.1978                | 170 up vs n   | 5.1978       | 5.1978                | 171 up vs n   |  |  |
| FC0049977.0        |  | -0.29998        | -2.9998               | 106 up vs n   | 0.17543      | 1.7543                | 111 up vs n   | 0.67883      | 6.08883               | 112 up vs n     | 0.47839      | -2.1024               | 121 down vs n | 0.2968          | 2.968                 | 137 up vs n   | -0.25528     | -3.91765              | 153 down vs n | -0.340001    | -2.91747              | 157 down vs n   | -0.340001    | -2.91747              | 165 down vs n | 1.7682          | 1.7682                | 170 up vs n   | 1.7682       | 1.7682                | 171 up vs n   |  |  |
| FC0049978.0        |  | 0.17697         | -2.9933               | 106 down vs n | 0.441869     | -2.9631               | 111 down vs n | 0.441869     | -2.9631               | 112 down vs n   | 0.441869     | -2.9631               | 121 down vs n | 0.441869        | -2.9631               | 137 down vs n | 0.441869     | -2.9631               | 153 down vs n | 0.441869     | -2.9631               | 157 down vs n   | 0.441869     | -2.9631               | 165 down vs n | 2.25515         | 6.8084                | 170 up vs n   | 2.25515      | 6.8084                | 171 up vs n   |  |  |
| FC0049980.0        |  | 0.734568        | -2.6691               | 106 down vs n | 0.54962      | -2.5629               | 111 down vs n | 0.54962      | -2.5629               | 112 down vs n   | 0.54962      | -2.5629               | 121 down vs n | 0.54962         | -2.5629               | 137 down vs n | 0.54962      | -2.5629               | 153 down vs n | 0.54962      | -2.5629               | 157 down vs n   | 0.54962      | -2.5629               | 165 down vs n | 2.25515         | 6.8084                | 170 up vs n   | 2.25515      | 6.8084                | 171 up vs n   |  |  |
| FC0049984.0        |  | 0.412063        | -2.6084               | 106 down vs n | 0.720282     | -3.09884              | 111 down vs n | 0.720282     | -3.09884              | 112 down vs n   | 0.720282     | -3.09884              | 121 down vs n | 0.720282        | -3.09884              | 137 down vs n | 0.720282     | -3.09884              | 153 down vs n | 0.720282     | -3.09884              | 157 down vs n   | 0.720282     | -3.09884              | 165 down vs n | 4.98802         | 12.0254               | 170 up vs n   | 4.98802      | 12.0254               | 171 up vs n   |  |  |
| FC0049991.0        |  | -0.28221        | -1.58999              | 106 down vs n | -0.12264     | -1.92264              | 111 down vs n | -0.28221     | -1.58999              | 112 down vs n   | -0.28221     | -1.58999              | 121 down vs n | -0.28221        | -1.58999              | 137 down vs n | -0.28221     | -1.58999              | 153 down vs n | -0.28221     | -1.58999              | 157 down vs n   | -0.28221     | -1.58999              | 165 down vs n | 5.59615         | 11.881                | 170 up vs n   | 5.59615      | 11.881                | 171 up vs n   |  |  |
| FC0049993.0        |  | 0.16399         | -1.58999              | 106 up vs n   | -0.72228     | -1.58999              | 111 up vs n   | -0.72228     | -1.58999              | 112 up vs n     | -0.72228     | -1.58999              | 121 up vs n   | -0.72228        | -1.58999              | 137 up vs n   | -0.72228     | -1.58999              | 153 up vs n   | -0.72228     | -1.58999              | 157 up vs n     | -0.72228     | -1.58999              | 165 up vs n   | 1.7682          | 1.7682                | 170 up vs n   | 1.7682       | 1.7682                | 171 up vs n   |  |  |
| FC0049994.0        |  | 0.16399         | -1.58999              | 106 up vs n   | -0.72228     | -1.58999              | 111 up vs n   | -0.72228     | -1.58999              | 112 up vs n     | -0.72228     | -1.58999              | 121 up vs n   | -0.72228        | -1.58999              | 137 up vs n   | -0.72228     | -1.58999              | 153 up vs n   | -0.72228     | -1.58999              | 157 up vs n     | -0.72228     | -1.58999              | 165 up vs n   | 1.7682          | 1.7682                | 170 up vs n   | 1.7682       | 1.7682                | 171 up vs n   |  |  |
| FC0050003.0        |  | 0.086649        | -1.58999              | 106 down vs n | 0.12586      | -1.58999              | 111 down vs n | 0.12586      | -1.58999              | 112 down vs n   | 0.12586      | -1.58999              | 121 down vs n | 0.12586         | -1.58999              | 137 down vs n | 0.12586      | -1.58999              | 153 down vs n | 0.12586      | -1.58999              | 157 down vs n   | 0.12586      | -1.58999              | 165 down vs n | 1.7682          | 1.7682                | 170 up vs n   | 1.7682       | 1.7682                | 171 up vs n   |  |  |
| FC0050005.0        |  | 0.13342         | -1.58999              | 106 down vs n | 0.24701      | -1.58999              | 111 down vs n | 0.24701      | -1.58999              | 112 down vs n   | 0.24701      | -1.58999              | 121 down vs n | 0.24701         | -1.58999              | 137 down vs n | 0.24701      | -1.58999              | 153 down vs n | 0.24701      | -1.58999              | 157 down vs n   | 0.24701      | -1.58999              | 165 down vs n | 1.7682          | 1.7682                | 170 up vs n   | 1.7682       | 1.7682                | 171 up vs n   |  |  |
| FC0050006.0        |  | 0.13342         | -1.58999              | 106 down vs n | 0.24701      | -1.58999              | 111 down vs n | 0.24701      | -1.58999              | 112 down vs n   | 0.24701      | -1.58999              | 121 down vs n | 0.24701         | -1.58999              | 137 down vs n | 0.24701      | -1.58999              | 153 down vs n | 0.24701      | -1.58999              | 157 down vs n   | 0.24701      | -1.58999              | 165 down vs n | 1.7682          | 1.7682                | 170 up vs n   | 1.7682       | 1.7682                | 171 up vs n   |  |  |
| FC0050008.0        |  | 0.13342         | -1.58999              | 106 down vs n | 0.24701      | -1.58999              | 111 down vs n | 0.24701      | -1.58999              | 112 down vs n   | 0.24701      | -1.58999              | 121 down vs n | 0.24701         | -1.58999              | 137 down vs n | 0.24701      | -1.58999              | 153 down vs n | 0.24701      | -1.58999              | 157 down vs n   | 0.24701      | -1.58999              | 165 down vs n | 1.7682          | 1.7682                | 170 up vs n   | 1.7682       | 1.7682                | 171 up vs n   |  |  |
| FC0050009.0        |  | -0.29998        | -2.9998               | 106 up vs n   | 0.0927314    | -1.04919              | 111 down vs n | 0.0927314    | -1.04919              | 112 down vs n   | 0.0927314    | -1.04919              | 121 down vs n | 0.0927314       | -1.04919              | 137 down vs n | 0.0927314    | -1.04919              | 153 down vs n | 0.0927314    | -1.04919              | 157 down vs n   | 0.0927314    | -1.04919              | 165 down vs n | 2.58615         | 62.7755               | 170 up vs n   | 2.58615      | 62.7755               | 171 up vs n   |  |  |
|                    |  |                 |                       |               |              |                       |               |              |                       |                 |              |                       |               |                 |                       |               |              |                       |               |              |                       |                 |              |                       |               |                 |                       |               |              |                       |               |  |  |

File: ESM\_10 (Online Resource 10)

Title: Comparative Multiresolution Molecular Analyses of Pediatric Diffuse Intrinsic Glioma Reveals Distinct Molecular Subtypes  
Journal: Acta Neuropathologica

Authors: Amanda M. Stransik, Mahesh Kumarbhat, Kendall Snyder, Sidick Yavuz, Joe Devenay, Brennan Harmon, Jordan Hall, Eric H. Rubie, Ping An, Melanie Weingart, Brian Reid, Sarah Magee, Roger J. Packer, Javad Nazarian

Corresponding Author:

Javad Nazarian, Children's National Medical Center, Center for Genetic Medicine  
111 Michigan Ave., NW, Washington DC, 20010  
Tel: 202-476-6022 Fax: 202-476-6041  
Email: J.Nazarian@CNMC.org

| FolChol[106] |          | FolChol[111] |            | FolChol[112] |           | FolChol[121] |          | FolChol[137] |            | FolChol[153] |           | FolChol[157] |          | FolChol[165] |            | FolChol[170] |           | FolChol[171] |          | FolChol[172] |            | FolChol[173] |           | FolChol[174] |          | FolChol[175] |            |          |           |            |          |         |            |          |         |            |          |         |            |          |         |            |          |         |            |          |         |            |          |         |            |          |         |            |          |         |            |          |         |            |          |         |            |          |         |            |          |         |            |          |         |            |          |         |            |          |         |            |          |         |            |          |         |            |          |         |            |          |         |            |          |         |            |          |         |            |          |         |            |          |         |            |          |         |            |          |         |            |          |         |            |          |         |            |          |         |            |          |         |            |          |         |            |          |         |            |          |         |            |          |         |            |          |         |            |          |         |            |          |         |            |          |         |            |          |         |            |          |         |            |          |         |            |          |         |            |          |         |            |          |         |            |          |         |            |          |         |            |          |         |            |          |         |            |          |         |            |          |         |            |          |         |            |          |         |            |          |         |            |          |         |            |          |         |            |          |         |            |          |         |            |          |         |            |          |         |            |          |         |            |          |         |            |          |         |            |          |         |            |          |         |            |          |         |            |          |         |            |          |         |            |          |         |            |          |         |            |          |         |            |          |         |            |          |         |            |          |         |            |          |         |            |          |         |            |          |         |            |          |         |            |          |         |            |          |         |            |          |         |            |          |         |            |          |         |            |          |         |            |          |         |            |          |         |            |          |         |            |          |         |            |          |         |            |          |         |            |          |         |            |          |         |            |          |         |            |          |         |            |          |         |            |          |         |            |          |         |            |          |         |            |          |         |            |          |         |            |          |         |            |          |         |            |          |         |            |          |         |            |          |         |            |          |         |            |          |         |            |          |         |            |          |         |            |          |         |            |          |         |            |          |         |            |          |         |            |          |         |            |          |         |            |          |         |            |          |         |            |          |         |            |          |         |            |          |         |            |          |         |            |          |         |            |          |         |            |          |         |            |          |         |            |          |         |            |          |         |            |          |         |            |          |         |            |          |         |            |          |         |            |          |         |            |          |         |            |          |         |            |          |         |            |          |         |            |          |         |            |          |         |            |          |         |            |          |         |            |          |         |            |          |         |            |          |         |            |          |         |            |          |         |            |          |         |            |          |         |            |          |         |            |          |         |            |          |         |            |          |         |            |          |         |            |          |         |            |          |         |            |          |         |            |          |         |            |          |         |            |          |         |            |          |         |            |          |         |            |          |         |            |          |         |            |          |         |            |          |         |            |          |         |            |          |         |            |          |         |            |          |         |            |          |         |            |          |         |            |          |         |            |          |         |            |          |         |            |          |         |            |          |         |            |          |         |            |          |         |            |          |         |            |          |         |            |          |         |            |          |         |            |          |         |            |          |         |            |          |         |            |          |         |            |          |         |            |          |         |            |          |         |            |          |         |            |          |         |            |          |         |            |          |         |            |          |         |            |          |         |            |          |         |            |          |         |            |          |         |            |          |         |            |          |         |            |          |         |            |          |         |            |          |         |            |          |         |            |          |         |            |          |         |            |          |         |            |          |         |            |          |         |            |          |         |            |          |         |            |          |         |            |          |         |            |          |         |            |          |         |            |          |         |            |          |         |            |          |         |            |          |         |            |          |         |            |          |         |            |          |         |            |          |         |            |          |         |            |          |         |            |          |         |            |          |         |            |          |         |            |          |         |            |          |         |            |          |         |            |          |         |            |          |         |            |          |         |            |          |         |            |          |         |            |          |         |            |          |         |            |          |         |            |          |         |            |          |         |            |          |         |            |          |         |            |          |         |            |          |         |            |          |         |            |          |         |            |          |         |            |          |         |            |          |         |            |          |         |            |          |         |            |          |         |            |          |         |            |          |         |            |          |         |            |          |         |            |          |         |            |          |         |            |          |         |            |          |         |            |          |         |            |          |         |            |          |         |            |          |         |            |          |         |            |          |         |            |          |         |            |          |         |            |          |         |            |          |         |            |          |         |            |          |         |            |          |         |            |          |         |            |          |         |            |          |         |            |          |         |            |          |         |            |          |         |            |          |         |            |          |         |            |          |         |            |          |         |            |          |         |            |          |         |            |          |         |            |          |         |            |          |         |            |          |         |            |          |         |            |          |         |            |          |         |            |          |         |            |          |         |            |          |         |            |          |         |            |          |         |            |          |         |            |          |         |            |          |         |            |          |         |            |          |         |            |          |         |            |          |         |            |          |         |            |          |         |            |          |         |            |          |         |            |          |         |            |          |         |            |          |         |            |          |         |            |          |         |            |          |         |            |          |         |            |          |         |            |          |         |            |          |         |            |          |         |            |          |         |            |          |         |            |          |         |            |          |
|--------------|----------|--------------|------------|--------------|-----------|--------------|----------|--------------|------------|--------------|-----------|--------------|----------|--------------|------------|--------------|-----------|--------------|----------|--------------|------------|--------------|-----------|--------------|----------|--------------|------------|----------|-----------|------------|----------|---------|------------|----------|---------|------------|----------|---------|------------|----------|---------|------------|----------|---------|------------|----------|---------|------------|----------|---------|------------|----------|---------|------------|----------|---------|------------|----------|---------|------------|----------|---------|------------|----------|---------|------------|----------|---------|------------|----------|---------|------------|----------|---------|------------|----------|---------|------------|----------|---------|------------|----------|---------|------------|----------|---------|------------|----------|---------|------------|----------|---------|------------|----------|---------|------------|----------|---------|------------|----------|---------|------------|----------|---------|------------|----------|---------|------------|----------|---------|------------|----------|---------|------------|----------|---------|------------|----------|---------|------------|----------|---------|------------|----------|---------|------------|----------|---------|------------|----------|---------|------------|----------|---------|------------|----------|---------|------------|----------|---------|------------|----------|---------|------------|----------|---------|------------|----------|---------|------------|----------|---------|------------|----------|---------|------------|----------|---------|------------|----------|---------|------------|----------|---------|------------|----------|---------|------------|----------|---------|------------|----------|---------|------------|----------|---------|------------|----------|---------|------------|----------|---------|------------|----------|---------|------------|----------|---------|------------|----------|---------|------------|----------|---------|------------|----------|---------|------------|----------|---------|------------|----------|---------|------------|----------|---------|------------|----------|---------|------------|----------|---------|------------|----------|---------|------------|----------|---------|------------|----------|---------|------------|----------|---------|------------|----------|---------|------------|----------|---------|------------|----------|---------|------------|----------|---------|------------|----------|---------|------------|----------|---------|------------|----------|---------|------------|----------|---------|------------|----------|---------|------------|----------|---------|------------|----------|---------|------------|----------|---------|------------|----------|---------|------------|----------|---------|------------|----------|---------|------------|----------|---------|------------|----------|---------|------------|----------|---------|------------|----------|---------|------------|----------|---------|------------|----------|---------|------------|----------|---------|------------|----------|---------|------------|----------|---------|------------|----------|---------|------------|----------|---------|------------|----------|---------|------------|----------|---------|------------|----------|---------|------------|----------|---------|------------|----------|---------|------------|----------|---------|------------|----------|---------|------------|----------|---------|------------|----------|---------|------------|----------|---------|------------|----------|---------|------------|----------|---------|------------|----------|---------|------------|----------|---------|------------|----------|---------|------------|----------|---------|------------|----------|---------|------------|----------|---------|------------|----------|---------|------------|----------|---------|------------|----------|---------|------------|----------|---------|------------|----------|---------|------------|----------|---------|------------|----------|---------|------------|----------|---------|------------|----------|---------|------------|----------|---------|------------|----------|---------|------------|----------|---------|------------|----------|---------|------------|----------|---------|------------|----------|---------|------------|----------|---------|------------|----------|---------|------------|----------|---------|------------|----------|---------|------------|----------|---------|------------|----------|---------|------------|----------|---------|------------|----------|---------|------------|----------|---------|------------|----------|---------|------------|----------|---------|------------|----------|---------|------------|----------|---------|------------|----------|---------|------------|----------|---------|------------|----------|---------|------------|----------|---------|------------|----------|---------|------------|----------|---------|------------|----------|---------|------------|----------|---------|------------|----------|---------|------------|----------|---------|------------|----------|---------|------------|----------|---------|------------|----------|---------|------------|----------|---------|------------|----------|---------|------------|----------|---------|------------|----------|---------|------------|----------|---------|------------|----------|---------|------------|----------|---------|------------|----------|---------|------------|----------|---------|------------|----------|---------|------------|----------|---------|------------|----------|---------|------------|----------|---------|------------|----------|---------|------------|----------|---------|------------|----------|---------|------------|----------|---------|------------|----------|---------|------------|----------|---------|------------|----------|---------|------------|----------|---------|------------|----------|---------|------------|----------|---------|------------|----------|---------|------------|----------|---------|------------|----------|---------|------------|----------|---------|------------|----------|---------|------------|----------|---------|------------|----------|---------|------------|----------|---------|------------|----------|---------|------------|----------|---------|------------|----------|---------|------------|----------|---------|------------|----------|---------|------------|----------|---------|------------|----------|---------|------------|----------|---------|------------|----------|---------|------------|----------|---------|------------|----------|---------|------------|----------|---------|------------|----------|---------|------------|----------|---------|------------|----------|---------|------------|----------|---------|------------|----------|---------|------------|----------|---------|------------|----------|---------|------------|----------|---------|------------|----------|---------|------------|----------|---------|------------|----------|---------|------------|----------|---------|------------|----------|---------|------------|----------|---------|------------|----------|---------|------------|----------|---------|------------|----------|---------|------------|----------|---------|------------|----------|---------|------------|----------|---------|------------|----------|---------|------------|----------|---------|------------|----------|---------|------------|----------|---------|------------|----------|---------|------------|----------|---------|------------|----------|---------|------------|----------|---------|------------|----------|---------|------------|----------|---------|------------|----------|---------|------------|----------|---------|------------|----------|---------|------------|----------|---------|------------|----------|---------|------------|----------|---------|------------|----------|---------|------------|----------|---------|------------|----------|---------|------------|----------|---------|------------|----------|---------|------------|----------|---------|------------|----------|---------|------------|----------|---------|------------|----------|---------|------------|----------|---------|------------|----------|---------|------------|----------|---------|------------|----------|---------|------------|----------|---------|------------|----------|---------|------------|----------|---------|------------|----------|---------|------------|----------|---------|------------|----------|---------|------------|----------|---------|------------|----------|---------|------------|----------|---------|------------|----------|---------|------------|----------|---------|------------|----------|---------|------------|----------|---------|------------|----------|---------|------------|----------|---------|------------|----------|---------|------------|----------|---------|------------|----------|---------|------------|----------|---------|------------|----------|---------|------------|----------|---------|------------|----------|---------|------------|----------|---------|------------|----------|---------|------------|----------|---------|------------|----------|---------|------------|----------|---------|------------|----------|---------|------------|----------|---------|------------|----------|---------|------------|----------|---------|------------|----------|---------|------------|----------|---------|------------|----------|---------|------------|----------|---------|------------|----------|---------|------------|----------|---------|------------|----------|---------|------------|----------|---------|------------|----------|---------|------------|----------|---------|------------|----------|---------|------------|----------|---------|------------|----------|---------|------------|----------|---------|------------|----------|---------|------------|----------|---------|------------|----------|---------|------------|----------|---------|------------|----------|---------|------------|----------|---------|------------|----------|---------|------------|----------|---------|------------|----------|---------|------------|----------|---------|------------|----------|---------|------------|----------|---------|------------|----------|---------|------------|----------|---------|------------|----------|---------|------------|----------|---------|------------|----------|---------|------------|----------|---------|------------|----------|---------|------------|----------|---------|------------|----------|---------|------------|----------|---------|------------|----------|---------|------------|----------|---------|------------|----------|---------|------------|----------|---------|------------|----------|---------|------------|----------|---------|------------|----------|---------|------------|----------|---------|------------|----------|---------|------------|----------|---------|------------|----------|---------|------------|----------|---------|------------|----------|
| Gene ID      | P-value  | MeanRatio    | FoldChange | P-value      | MeanRatio | FoldChange   | P-value  | MeanRatio    | FoldChange | P-value      | MeanRatio | FoldChange   | P-value  | MeanRatio    | FoldChange | P-value      | MeanRatio | FoldChange   | P-value  | MeanRatio    | FoldChange | P-value      | MeanRatio | FoldChange   | P-value  | MeanRatio    | FoldChange | P-value  | MeanRatio | FoldChange |          |         |            |          |         |            |          |         |            |          |         |            |          |         |            |          |         |            |          |         |            |          |         |            |          |         |            |          |         |            |          |         |            |          |         |            |          |         |            |          |         |            |          |         |            |          |         |            |          |         |            |          |         |            |          |         |            |          |         |            |          |         |            |          |         |            |          |         |            |          |         |            |          |         |            |          |         |            |          |         |            |          |         |            |          |         |            |          |         |            |          |         |            |          |         |            |          |         |            |          |         |            |          |         |            |          |         |            |          |         |            |          |         |            |          |         |            |          |         |            |          |         |            |          |         |            |          |         |            |          |         |            |          |         |            |          |         |            |          |         |            |          |         |            |          |         |            |          |         |            |          |         |            |          |         |            |          |         |            |          |         |            |          |         |            |          |         |            |          |         |            |          |         |            |          |         |            |          |         |            |          |         |            |          |         |            |          |         |            |          |         |            |          |         |            |          |         |            |          |         |            |          |         |            |          |         |            |          |         |            |          |         |            |          |         |            |          |         |            |          |         |            |          |         |            |          |         |            |          |         |            |          |         |            |          |         |            |          |         |            |          |         |            |          |         |            |          |         |            |          |         |            |          |         |            |          |         |            |          |         |            |          |         |            |          |         |            |          |         |            |          |         |            |          |         |            |          |         |            |          |         |            |          |         |            |          |         |            |          |         |            |          |         |            |          |         |            |          |         |            |          |         |            |          |         |            |          |         |            |          |         |            |          |         |            |          |         |            |          |         |            |          |         |            |          |         |            |          |         |            |          |         |            |          |         |            |          |         |            |          |         |            |          |         |            |          |         |            |          |         |            |          |         |            |          |         |            |          |         |            |          |         |            |          |         |            |          |         |            |          |         |            |          |         |            |          |         |            |          |         |            |          |         |            |          |         |            |          |         |            |          |         |            |          |         |            |          |         |            |          |         |            |          |         |            |          |         |            |          |         |            |          |         |            |          |         |            |          |         |            |          |         |            |          |         |            |          |         |            |          |         |            |          |         |            |          |         |            |          |         |            |          |         |            |          |         |            |          |         |            |          |         |            |          |         |            |          |         |            |          |         |            |          |         |            |          |         |            |          |         |            |          |         |            |          |         |            |          |         |            |          |         |            |          |         |            |          |         |            |          |         |            |          |         |            |          |         |            |          |         |            |          |         |            |          |         |            |          |         |            |          |         |            |          |         |            |          |         |            |          |         |            |          |         |            |          |         |            |          |         |            |          |         |            |          |         |            |          |         |            |          |         |            |          |         |            |          |         |            |          |         |            |          |         |            |          |         |            |          |         |            |          |         |            |          |         |            |          |         |            |          |         |            |          |         |            |          |         |            |          |         |            |          |         |            |          |         |            |          |         |            |          |         |            |          |         |            |          |         |            |          |         |            |          |         |            |          |         |            |          |         |            |          |         |            |          |         |            |          |         |            |          |         |            |          |         |            |          |         |            |          |         |            |          |         |            |          |         |            |          |         |            |          |         |            |          |         |            |          |         |            |          |         |            |          |         |            |          |         |            |          |         |            |          |         |            |          |         |            |          |         |            |          |         |            |          |         |            |          |         |            |          |         |            |          |         |            |          |         |            |          |         |            |          |         |            |          |         |            |          |         |            |          |         |            |          |         |            |          |         |            |          |         |            |          |         |            |          |         |            |          |         |            |          |         |            |          |         |            |          |         |            |          |         |            |          |         |            |          |         |            |          |         |            |          |         |            |          |         |            |          |         |            |          |         |            |          |         |            |          |         |            |          |         |            |          |         |            |          |         |            |          |         |            |          |         |            |          |         |            |          |         |            |          |         |            |          |         |            |          |         |            |          |         |            |          |         |            |          |         |            |          |         |            |          |         |            |          |         |            |          |         |            |          |         |            |          |         |            |          |         |            |          |         |            |          |         |            |          |         |            |          |         |            |          |         |            |          |         |            |          |         |            |          |         |            |          |         |            |          |         |            |          |         |            |          |         |            |          |         |            |          |         |            |          |         |            |          |         |            |          |         |            |          |         |            |          |         |            |          |         |            |          |         |            |          |         |            |          |         |            |          |         |            |          |         |            |          |         |            |          |         |            |          |         |            |          |         |            |          |         |            |          |         |            |          |         |            |          |         |            |          |         |            |          |         |            |          |         |            |          |         |            |          |         |            |          |         |            |          |         |            |          |         |            |          |         |            |          |         |            |          |         |            |          |         |            |          |         |            |          |         |            |          |
| LOC100295336 | 1.38E-03 | 1.88389      | 106 up v n | 1.55E-43     | 1.88389   | 111 up v n   | 1.53E-31 | 1.88389      | 112 up v n | 8.47E-29     | 1.88389   | 121 up v n   | 1.61E-32 | 1.88389      | 137 up v n | 2.54E-36     | 1.88389   | 153 up v n   | 9.90E-37 | 1.88389      | 157 up v n | 2.14E-45     | 1.88389   | 165 up v n   | 1.92E-06 | 1.88389      | 170 up v n | 1.92E-06 | 1.88389   | 171 up v n | 1.92E-06 | 1.88389 | 172 up v n | 1.92E-06 | 1.88389 | 173 up v n | 1.92E-06 | 1.88389 | 174 up v n | 1.92E-06 | 1.88389 | 175 up v n | 1.92E-06 | 1.88389 | 176 up v n | 1.92E-06 | 1.88389 | 177 up v n | 1.92E-06 | 1.88389 | 178 up v n | 1.92E-06 | 1.88389 | 179 up v n | 1.92E-06 | 1.88389 | 180 up v n | 1.92E-06 | 1.88389 | 181 up v n | 1.92E-06 | 1.88389 | 182 up v n | 1.92E-06 | 1.88389 | 183 up v n | 1.92E-06 | 1.88389 | 184 up v n | 1.92E-06 | 1.88389 | 185 up v n | 1.92E-06 | 1.88389 | 186 up v n | 1.92E-06 | 1.88389 | 187 up v n | 1.92E-06 | 1.88389 | 188 up v n | 1.92E-06 | 1.88389 | 189 up v n | 1.92E-06 | 1.88389 | 190 up v n | 1.92E-06 | 1.88389 | 191 up v n | 1.92E-06 | 1.88389 | 192 up v n | 1.92E-06 | 1.88389 | 193 up v n | 1.92E-06 | 1.88389 | 194 up v n | 1.92E-06 | 1.88389 | 195 up v n | 1.92E-06 | 1.88389 | 196 up v n | 1.92E-06 | 1.88389 | 197 up v n | 1.92E-06 | 1.88389 | 198 up v n | 1.92E-06 | 1.88389 | 199 up v n | 1.92E-06 | 1.88389 | 200 up v n | 1.92E-06 | 1.88389 | 201 up v n | 1.92E-06 | 1.88389 | 202 up v n | 1.92E-06 | 1.88389 | 203 up v n | 1.92E-06 | 1.88389 | 204 up v n | 1.92E-06 | 1.88389 | 205 up v n | 1.92E-06 | 1.88389 | 206 up v n | 1.92E-06 | 1.88389 | 207 up v n | 1.92E-06 | 1.88389 | 208 up v n | 1.92E-06 | 1.88389 | 209 up v n | 1.92E-06 | 1.88389 | 210 up v n | 1.92E-06 | 1.88389 | 211 up v n | 1.92E-06 | 1.88389 | 212 up v n | 1.92E-06 | 1.88389 | 213 up v n | 1.92E-06 | 1.88389 | 214 up v n | 1.92E-06 | 1.88389 | 215 up v n | 1.92E-06 | 1.88389 | 216 up v n | 1.92E-06 | 1.88389 | 217 up v n | 1.92E-06 | 1.88389 | 218 up v n | 1.92E-06 | 1.88389 | 219 up v n | 1.92E-06 | 1.88389 | 220 up v n | 1.92E-06 | 1.88389 | 221 up v n | 1.92E-06 | 1.88389 | 222 up v n | 1.92E-06 | 1.88389 | 223 up v n | 1.92E-06 | 1.88389 | 224 up v n | 1.92E-06 | 1.88389 | 225 up v n | 1.92E-06 | 1.88389 | 226 up v n | 1.92E-06 | 1.88389 | 227 up v n | 1.92E-06 | 1.88389 | 228 up v n | 1.92E-06 | 1.88389 | 229 up v n | 1.92E-06 | 1.88389 | 230 up v n | 1.92E-06 | 1.88389 | 231 up v n | 1.92E-06 | 1.88389 | 232 up v n | 1.92E-06 | 1.88389 | 233 up v n | 1.92E-06 | 1.88389 | 234 up v n | 1.92E-06 | 1.88389 | 235 up v n | 1.92E-06 | 1.88389 | 236 up v n | 1.92E-06 | 1.88389 | 237 up v n | 1.92E-06 | 1.88389 | 238 up v n | 1.92E-06 | 1.88389 | 239 up v n | 1.92E-06 | 1.88389 | 240 up v n | 1.92E-06 | 1.88389 | 241 up v n | 1.92E-06 | 1.88389 | 242 up v n | 1.92E-06 | 1.88389 | 243 up v n | 1.92E-06 | 1.88389 | 244 up v n | 1.92E-06 | 1.88389 | 245 up v n | 1.92E-06 | 1.88389 | 246 up v n | 1.92E-06 | 1.88389 | 247 up v n | 1.92E-06 | 1.88389 | 248 up v n | 1.92E-06 | 1.88389 | 249 up v n | 1.92E-06 | 1.88389 | 250 up v n | 1.92E-06 | 1.88389 | 251 up v n | 1.92E-06 | 1.88389 | 252 up v n | 1.92E-06 | 1.88389 | 253 up v n | 1.92E-06 | 1.88389 | 254 up v n | 1.92E-06 | 1.88389 | 255 up v n | 1.92E-06 | 1.88389 | 256 up v n | 1.92E-06 | 1.88389 | 257 up v n | 1.92E-06 | 1.88389 | 258 up v n | 1.92E-06 | 1.88389 | 259 up v n | 1.92E-06 | 1.88389 | 260 up v n | 1.92E-06 | 1.88389 | 261 up v n | 1.92E-06 | 1.88389 | 262 up v n | 1.92E-06 | 1.88389 | 263 up v n | 1.92E-06 | 1.88389 | 264 up v n | 1.92E-06 | 1.88389 | 265 up v n | 1.92E-06 | 1.88389 | 266 up v n | 1.92E-06 | 1.88389 | 267 up v n | 1.92E-06 | 1.88389 | 268 up v n | 1.92E-06 | 1.88389 | 269 up v n | 1.92E-06 | 1.88389 | 270 up v n | 1.92E-06 | 1.88389 | 271 up v n | 1.92E-06 | 1.88389 | 272 up v n | 1.92E-06 | 1.88389 | 273 up v n | 1.92E-06 | 1.88389 | 274 up v n | 1.92E-06 | 1.88389 | 275 up v n | 1.92E-06 | 1.88389 | 276 up v n | 1.92E-06 | 1.88389 | 277 up v n | 1.92E-06 | 1.88389 | 278 up v n | 1.92E-06 | 1.88389 | 279 up v n | 1.92E-06 | 1.88389 | 280 up v n | 1.92E-06 | 1.88389 | 281 up v n | 1.92E-06 | 1.88389 | 282 up v n | 1.92E-06 | 1.88389 | 283 up v n | 1.92E-06 | 1.88389 | 284 up v n | 1.92E-06 | 1.88389 | 285 up v n | 1.92E-06 | 1.88389 | 286 up v n | 1.92E-06 | 1.88389 | 287 up v n | 1.92E-06 | 1.88389 | 288 up v n | 1.92E-06 | 1.88389 | 289 up v n | 1.92E-06 | 1.88389 | 290 up v n | 1.92E-06 | 1.88389 | 291 up v n | 1.92E-06 | 1.88389 | 292 up v n | 1.92E-06 | 1.88389 | 293 up v n | 1.92E-06 | 1.88389 | 294 up v n | 1.92E-06 | 1.88389 | 295 up v n | 1.92E-06 | 1.88389 | 296 up v n | 1.92E-06 | 1.88389 | 297 up v n | 1.92E-06 | 1.88389 | 298 up v n | 1.92E-06 | 1.88389 | 299 up v n | 1.92E-06 | 1.88389 | 300 up v n | 1.92E-06 | 1.88389 | 301 up v n | 1.92E-06 | 1.88389 | 302 up v n | 1.92E-06 | 1.88389 | 303 up v n | 1.92E-06 | 1.88389 | 304 up v n | 1.92E-06 | 1.88389 | 305 up v n | 1.92E-06 | 1.88389 | 306 up v n | 1.92E-06 | 1.88389 | 307 up v n | 1.92E-06 | 1.88389 | 308 up v n | 1.92E-06 | 1.88389 | 309 up v n | 1.92E-06 | 1.88389 | 310 up v n | 1.92E-06 | 1.88389 | 311 up v n | 1.92E-06 | 1.88389 | 312 up v n | 1.92E-06 | 1.88389 | 313 up v n | 1.92E-06 | 1.88389 | 314 up v n | 1.92E-06 | 1.88389 | 315 up v n | 1.92E-06 | 1.88389 | 316 up v n | 1.92E-06 | 1.88389 | 317 up v n | 1.92E-06 | 1.88389 | 318 up v n | 1.92E-06 | 1.88389 | 319 up v n | 1.92E-06 | 1.88389 | 320 up v n | 1.92E-06 | 1.88389 | 321 up v n | 1.92E-06 | 1.88389 | 322 up v n | 1.92E-06 | 1.88389 | 323 up v n | 1.92E-06 | 1.88389 | 324 up v n | 1.92E-06 | 1.88389 | 325 up v n | 1.92E-06 | 1.88389 | 326 up v n | 1.92E-06 | 1.88389 | 327 up v n | 1.92E-06 | 1.88389 | 328 up v n | 1.92E-06 | 1.88389 | 329 up v n | 1.92E-06 | 1.88389 | 330 up v n | 1.92E-06 | 1.88389 | 331 up v n | 1.92E-06 | 1.88389 | 332 up v n | 1.92E-06 | 1.88389 | 333 up v n | 1.92E-06 | 1.88389 | 334 up v n | 1.92E-06 | 1.88389 | 335 up v n | 1.92E-06 | 1.88389 | 336 up v n | 1.92E-06 | 1.88389 | 337 up v n | 1.92E-06 | 1.88389 | 338 up v n | 1.92E-06 | 1.88389 | 339 up v n | 1.92E-06 | 1.88389 | 340 up v n | 1.92E-06 | 1.88389 | 341 up v n | 1.92E-06 | 1.88389 | 342 up v n | 1.92E-06 | 1.88389 | 343 up v n | 1.92E-06 | 1.88389 | 344 up v n | 1.92E-06 | 1.88389 | 345 up v n | 1.92E-06 | 1.88389 | 346 up v n | 1.92E-06 | 1.88389 | 347 up v n | 1.92E-06 | 1.88389 | 348 up v n | 1.92E-06 | 1.88389 | 349 up v n | 1.92E-06 | 1.88389 | 350 up v n | 1.92E-06 | 1.88389 | 351 up v n | 1.92E-06 | 1.88389 | 352 up v n | 1.92E-06 | 1.88389 | 353 up v n | 1.92E-06 | 1.88389 | 354 up v n | 1.92E-06 | 1.88389 | 355 up v n | 1.92E-06 | 1.88389 | 356 up v n | 1.92E-06 | 1.88389 | 357 up v n | 1.92E-06 | 1.88389 | 358 up v n | 1.92E-06 | 1.88389 | 359 up v n | 1.92E-06 | 1.88389 | 360 up v n | 1.92E-06 | 1.88389 | 361 up v n | 1.92E-06 | 1.88389 | 362 up v n | 1.92E-06 | 1.88389 | 363 up v n | 1.92E-06 | 1.88389 | 364 up v n | 1.92E-06 | 1.88389 | 365 up v n | 1.92E-06 | 1.88389 | 366 up v n | 1.92E-06 | 1.88389 | 367 up v n | 1.92E-06 | 1.88389 | 368 up v n | 1.92E-06 | 1.88389 | 369 up v n | 1.92E-06 | 1.88389 | 370 up v n | 1.92E-06 | 1.88389 | 371 up v n | 1.92E-06 | 1.88389 | 372 up v n | 1.92E-06 | 1.88389 | 373 up v n | 1.92E-06 | 1.88389 | 374 up v n | 1.92E-06 | 1.88389 | 375 up v n | 1.92E-06 | 1.88389 | 376 up v n | 1.92E-06 | 1.88389 | 377 up v n | 1.92E-06 | 1.88389 | 378 up v n | 1.92E-06 | 1.88389 | 379 up v n | 1.92E-06 | 1.88389 | 380 up v n | 1.92E-06 | 1.88389 | 381 up v n | 1.92E-06 | 1.88389 | 382 up v n | 1.92E-06 | 1.88389 | 383 up v n | 1.92E-06 | 1.88389 | 384 up v n | 1.92E-06 | 1.88389 | 385 up v n | 1.92E-06 | 1.88389 | 386 up v n | 1.92E-06 | 1.88389 | 387 up v n | 1.92E-06 | 1.88389 | 388 up v n | 1.92E-06 | 1.88389 | 389 up v n | 1.92E-06 | 1.88389 | 390 up v n | 1.92E-06 | 1.88389 | 391 up v n | 1.92E-06 | 1.88389 | 392 up v n | 1.92E-06 | 1.88389 | 393 up v n | 1.92E-06 | 1.88389 | 394 up v n | 1.92E-06 | 1.88389 | 395 up v n | 1.92E-06 | 1.88389 | 396 up v n | 1.92E-06 | 1.88389 | 397 up v n | 1.92E-06 | 1.88389 | 398 up v n | 1.92E-06 | 1.88389 | 399 up v n | 1.92E-06 | 1.88389 | 400 up v n | 1.92E-06 | 1.88389 | 401 up v n | 1.92E-06 | 1.88389 | 402 up v n | 1.92E-06 | 1.88389 | 403 up v n | 1.92E-06 | 1.88389 | 404 up v n | 1.92E-06 | 1.88389 | 405 up v n | 1.92E-06 | 1.88389 | 406 up v n | 1.92E-06 | 1.88389 | 407 up v n | 1.92E-06 | 1.88389 | 408 up v n | 1.92E-06 | 1.88389 | 409 up v n | 1.92E-06 | 1.88389 | 410 up v n | 1.92E-06 | 1.88389 | 411 up v n | 1.92E-06 | 1.88389 | 412 up v n | 1.92E-06 | 1.88389 | 413 up v n | 1.92E-06 | 1.88389 | 414 up v n | 1.92E-06 | 1.88389 | 415 up v n | 1.92E-06 | 1.88389 | 416 up v n | 1.92E-06 | 1.88389 | 417 up v n | 1.92E-06 | 1.88389 | 418 up v n | 1.92E-06 | 1.88389 | 419 up v n | 1.92E-06 | 1.88389 | 420 up v n | 1.92E-06 | 1.88389 | 421 up v n | 1.92E-06 | 1.88389 | 422 up v n | 1.92E-06 | 1.88389 | 423 up v n | 1.92E-06 | 1.88389 | 424 up v n | 1.92E-06 | 1.88389 | 425 up v n | 1.92E-06 | 1.88389 | 426 up v n | 1.92E-06 | 1.88389 | 427 up v n | 1.92E-06 | 1.88389 | 428 up v n | 1.92E-06 | 1.88389 | 429 up v n | 1.92E-06 | 1.88389 | 430 up v n | 1.92E-06 | 1.88389 | 431 up v n | 1.92E-06 | 1.88389 | 432 up v n | 1.92E-06 | 1.88389 | 433 up v n | 1.92E-06 | 1.88389 | 434 up v n | 1.92E-06 | 1.88389 | 435 up v n | 1.92E-06 | 1.88389 | 436 up v n | 1.92E-06 | 1.88389 | 437 up v n | 1.92E-06 | 1.88389 | 438 up v n | 1.92E-06 | 1.88389 | 439 up v n | 1.92E-06 | 1.88389 | 440 up v n | 1.92E-06 | 1.88389 | 441 up v n | 1.92E-06 | 1.88389 | 442 up v n | 1.92E-06 | 1.88389 | 443 up v n | 1.92E-06 | 1.88389 | 444 up v n | 1.92E-06 | 1.88389 | 445 up v n | 1.92E-06 | 1.88389 | 446 up v n | 1.92E-06 | 1.88389 | 447 up v n | 1.92E-06 | 1.88389 | 448 up v n | 1.92E-06 | 1.88389 | 449 up v n | 1.92E-06 | 1.88389 | 450 up v n | 1.92E-06 | 1.88389 | 451 up v n | 1.92E-06 | 1.88389 | 452 up v n | 1.92E-06 | 1.88389 | 453 up v n | 1.92E-06 | 1.88389 | 454 up v n | 1.92E-06 | 1.88389 | 455 up v n | 1.92E-06 | 1.88389 | 456 up v n | 1.92E-06 | 1.88389 | 457 up v n | 1.92E-06 | 1.88389 | 458 up v n | 1.92E-06 | 1.88389 | 459 up v n | 1.92E-06 | 1.88389 | 460 up v n | 1.92E-06 | 1.88389 | 461 up v n | 1.92E-06 | 1.88389 | 462 up v n | 1.92E-06 | 1.88389 | 463 up v n | 1.92E-06 | 1.88389 | 464 up v n | 1.92E-06 | 1.88389 | 465 up v n | 1.92E-06 | 1.88389 | 466 up v n | 1.92E-06 | 1.88389 | 467 up v n | 1.92E-06 | 1.88389 | 468 up v n | 1.92E-06 | 1.88389 | 469 up v n | 1.92E-06 | 1.88389 | 470 up v n | 1.92E-06 | 1.88389 | 471 up v n | 1.92E-06 | 1.88389 | 472 up v n | 1.92E-06 | 1.88389 | 473 up v n | 1.92E-06 | 1.88389 | 474 up v n | 1.92E-06 | 1.88389 | 475 up v n | 1.92E-06 | 1.88389 | 476 up v n | 1.92E-06 | 1.88389 | 477 up v n | 1.92E-06 | 1.88389 | 478 up v n | 1.92E-06 | 1.88389 | 479 up v n | 1.92E-06 | 1.88389 | 480 up v n | 1.92E-06 | 1.88389 | 481 up v n | 1.92E-06 | 1.88389 | 482 up v n | 1.92E-06 | 1.88389 | 483 up v n | 1.92E-06 | 1.88389 | 484 up v n | 1.92E-06 | 1.88389 | 485 up v n | 1.92E-06 | 1.88389 | 486 up v n | 1.92E-06 | 1.88389 | 487 up v n | 1.92E-06 | 1.88389 | 488 up v n | 1.92E-06 | 1.88389 | 489 up v n | 1.92E-06 | 1.88389 | 490 up v n | 1.92E-06 | 1.88389 | 491 up v n | 1.92E-06 | 1.88389 | 492 up v n | 1.92E-06 |



**Title:** Comparative Multidimensional Molecular Analyses of Pediatric Diffuse Intrinsic Pontine Glioma Reveals Distinct Molecular Subtypes  
**Journal:** *Acta Neuropathologica*

Javad Nazarian, Children's National Medical Center, Center for Genetic Medicine

Javad Nazarian, Children's National Medical Center, Center for Genetic Medicine

Phone: 202-476-6022 Fax: 202-476-6014

= E-140k-----140 = E-140k-----144 =

| Geno | id | val | 10k |
|------|----|-----|-----|-----|-----|-----|-----|-----|-----|-----|-----|-----|-----|-----|-----|-----|-----|-----|-----|-----|-----|-----|-----|-----|-----|-----|-----|-----|-----|-----|-----|-----|-----|-----|-----|-----|-----|-----|-----|-----|-----|-----|-----|-----|-----|-----|-----|-----|-----|-----|-----|-----|-----|-----|-----|-----|-----|-----|-----|-----|-----|-----|-----|-----|-----|-----|-----|-----|-----|-----|-----|-----|-----|-----|-----|-----|-----|-----|-----|-----|-----|-----|-----|-----|-----|-----|-----|-----|-----|-----|-----|-----|-----|-----|-----|-----|-----|-----|-----|-----|-----|-----|-----|-----|-----|-----|-----|-----|-----|-----|-----|-----|-----|-----|-----|-----|-----|-----|-----|-----|-----|-----|-----|-----|-----|-----|-----|-----|-----|-----|-----|-----|-----|-----|-----|-----|-----|-----|-----|-----|-----|-----|-----|-----|-----|-----|-----|-----|-----|-----|-----|-----|-----|-----|-----|-----|-----|-----|-----|-----|-----|-----|-----|-----|-----|-----|-----|-----|-----|-----|-----|-----|-----|-----|-----|-----|-----|-----|-----|-----|-----|-----|-----|-----|-----|-----|-----|-----|-----|-----|-----|-----|-----|-----|-----|-----|-----|-----|-----|-----|-----|-----|-----|-----|-----|-----|-----|-----|-----|-----|-----|-----|-----|-----|-----|-----|-----|-----|-----|-----|-----|-----|-----|-----|-----|-----|-----|-----|-----|-----|-----|-----|-----|-----|-----|-----|-----|-----|-----|-----|-----|-----|-----|-----|-----|-----|-----|-----|-----|-----|-----|-----|-----|-----|-----|-----|-----|-----|-----|-----|-----|-----|-----|-----|-----|-----|-----|-----|-----|-----|-----|-----|-----|-----|-----|-----|-----|-----|-----|-----|-----|-----|-----|-----|-----|-----|-----|-----|-----|-----|-----|-----|-----|-----|-----|-----|-----|-----|-----|-----|-----|-----|-----|-----|-----|-----|-----|-----|-----|-----|-----|-----|-----|-----|-----|-----|-----|-----|-----|-----|-----|-----|-----|-----|-----|-----|-----|-----|-----|-----|-----|-----|-----|-----|-----|-----|-----|-----|-----|-----|-----|-----|-----|-----|-----|-----|-----|-----|-----|-----|-----|-----|-----|-----|-----|-----|-----|-----|-----|-----|-----|-----|-----|-----|-----|-----|-----|-----|-----|-----|-----|-----|-----|-----|-----|-----|-----|-----|-----|-----|-----|-----|-----|-----|-----|-----|-----|-----|-----|-----|-----|-----|-----|-----|-----|-----|-----|-----|-----|-----|-----|-----|-----|-----|-----|-----|-----|-----|-----|-----|-----|-----|-----|-----|-----|-----|-----|-----|-----|-----|-----|-----|-----|-----|-----|-----|-----|-----|-----|-----|-----|-----|-----|-----|-----|-----|-----|-----|-----|-----|-----|-----|-----|-----|-----|-----|-----|-----|-----|-----|-----|-----|-----|-----|-----|-----|-----|-----|-----|-----|-----|-----|-----|-----|-----|-----|-----|-----|-----|-----|-----|-----|-----|-----|-----|-----|-----|-----|-----|-----|-----|-----|-----|-----|-----|-----|-----|-----|-----|-----|-----|-----|-----|-----|-----|-----|-----|-----|-----|-----|-----|-----|-----|-----|-----|-----|-----|-----|-----|-----|-----|-----|-----|-----|-----|-----|-----|-----|-----|-----|-----|-----|-----|-----|-----|-----|-----|-----|-----|-----|-----|-----|-----|-----|-----|-----|-----|-----|-----|-----|-----|-----|-----|-----|-----|-----|-----|-----|-----|-----|-----|-----|-----|-----|-----|-----|-----|-----|-----|-----|-----|-----|-----|-----|-----|-----|-----|-----|-----|-----|-----|-----|-----|-----|-----|-----|-----|-----|-----|-----|-----|-----|-----|-----|-----|-----|-----|-----|-----|-----|-----|-----|-----|-----|-----|-----|-----|-----|-----|-----|-----|-----|-----|-----|-----|-----|-----|-----|-----|-----|-----|-----|-----|-----|-----|-----|-----|-----|-----|-----|-----|-----|-----|-----|-----|-----|-----|-----|-----|-----|-----|-----|-----|-----|-----|-----|-----|-----|-----|-----|-----|-----|-----|-----|-----|-----|-----|-----|-----|-----|-----|-----|-----|-----|-----|-----|-----|-----|-----|-----|-----|-----|-----|-----|-----|-----|-----|-----|-----|-----|-----|-----|-----|-----|-----|-----|-----|-----|-----|-----|-----|-----|-----|-----|-----|-----|-----|-----|-----|-----|-----|-----|-----|-----|-----|-----|-----|-----|-----|-----|-----|-----|-----|-----|-----|-----|-----|-----|-----|-----|-----|-----|-----|-----|-----|-----|-----|-----|-----|-----|-----|-----|-----|-----|-----|-----|-----|-----|-----|-----|-----|-----|-----|-----|-----|-----|-----|-----|-----|-----|-----|-----|-----|-----|-----|-----|-----|-----|-----|-----|-----|-----|-----|-----|-----|-----|-----|-----|-----|-----|-----|-----|-----|-----|-----|-----|-----|-----|-----|-----|-----|-----|-----|-----|-----|-----|-----|-----|-----|-----|-----|-----|-----|-----|-----|-----|-----|-----|-----|-----|-----|-----|-----|-----|-----|-----|-----|-----|-----|-----|-----|-----|-----|-----|-----|-----|-----|-----|-----|-----|-----|-----|-----|-----|-----|-----|-----|-----|-----|-----|-----|-----|-----|-----|-----|-----|-----|-----|-----|-----|-----|-----|-----|-----|-----|-----|-----|-----|-----|-----|-----|-----|-----|-----|-----|-----|-----|-----|-----|-----|-----|-----|-----|-----|-----|-----|-----|-----|-----|-----|-----|-----|-----|-----|-----|-----|-----|-----|-----|-----|-----|-----|-----|-----|-----|-----|-----|-----|-----|-----|-----|-----|-----|-----|-----|-----|-----|-----|-----|-----|-----|-----|-----|-----|-----|-----|-----|-----|-----|-----|-----|-----|-----|-----|-----|-----|-----|-----|-----|-----|-----|-----|-----|-----|-----|-----|-----|-----|-----|-----|-----|-----|-----|-----|-----|-----|-----|-----|-----|-----|-----|-----|-----|-----|-----|-----|-----|-----|-----|-----|-----|-----|-----|-----|-----|-----|-----|-----|-----|-----|-----|-----|-----|-----|-----|-----|-----|-----|-----|-----|-----|-----|-----|-----|-----|-----|-----|-----|-----|-----|-----|-----|-----|-----|-----|-----|-----|-----|-----|-----|-----|-----|-----|-----|-----|-----|-----|-----|-----|-----|-----|-----|-----|-----|-----|-----|-----|-----|-----|-----|-----|-----|-----|-----|-----|-----|-----|-----|-----|-----|-----|-----|-----|-----|-----|-----|-----|-----|-----|-----|-----|-----|-----|-----|-----|-----|-----|-----|-----|-----|-----|-----|
|------|----|-----|-----|-----|-----|-----|-----|-----|-----|-----|-----|-----|-----|-----|-----|-----|-----|-----|-----|-----|-----|-----|-----|-----|-----|-----|-----|-----|-----|-----|-----|-----|-----|-----|-----|-----|-----|-----|-----|-----|-----|-----|-----|-----|-----|-----|-----|-----|-----|-----|-----|-----|-----|-----|-----|-----|-----|-----|-----|-----|-----|-----|-----|-----|-----|-----|-----|-----|-----|-----|-----|-----|-----|-----|-----|-----|-----|-----|-----|-----|-----|-----|-----|-----|-----|-----|-----|-----|-----|-----|-----|-----|-----|-----|-----|-----|-----|-----|-----|-----|-----|-----|-----|-----|-----|-----|-----|-----|-----|-----|-----|-----|-----|-----|-----|-----|-----|-----|-----|-----|-----|-----|-----|-----|-----|-----|-----|-----|-----|-----|-----|-----|-----|-----|-----|-----|-----|-----|-----|-----|-----|-----|-----|-----|-----|-----|-----|-----|-----|-----|-----|-----|-----|-----|-----|-----|-----|-----|-----|-----|-----|-----|-----|-----|-----|-----|-----|-----|-----|-----|-----|-----|-----|-----|-----|-----|-----|-----|-----|-----|-----|-----|-----|-----|-----|-----|-----|-----|-----|-----|-----|-----|-----|-----|-----|-----|-----|-----|-----|-----|-----|-----|-----|-----|-----|-----|-----|-----|-----|-----|-----|-----|-----|-----|-----|-----|-----|-----|-----|-----|-----|-----|-----|-----|-----|-----|-----|-----|-----|-----|-----|-----|-----|-----|-----|-----|-----|-----|-----|-----|-----|-----|-----|-----|-----|-----|-----|-----|-----|-----|-----|-----|-----|-----|-----|-----|-----|-----|-----|-----|-----|-----|-----|-----|-----|-----|-----|-----|-----|-----|-----|-----|-----|-----|-----|-----|-----|-----|-----|-----|-----|-----|-----|-----|-----|-----|-----|-----|-----|-----|-----|-----|-----|-----|-----|-----|-----|-----|-----|-----|-----|-----|-----|-----|-----|-----|-----|-----|-----|-----|-----|-----|-----|-----|-----|-----|-----|-----|-----|-----|-----|-----|-----|-----|-----|-----|-----|-----|-----|-----|-----|-----|-----|-----|-----|-----|-----|-----|-----|-----|-----|-----|-----|-----|-----|-----|-----|-----|-----|-----|-----|-----|-----|-----|-----|-----|-----|-----|-----|-----|-----|-----|-----|-----|-----|-----|-----|-----|-----|-----|-----|-----|-----|-----|-----|-----|-----|-----|-----|-----|-----|-----|-----|-----|-----|-----|-----|-----|-----|-----|-----|-----|-----|-----|-----|-----|-----|-----|-----|-----|-----|-----|-----|-----|-----|-----|-----|-----|-----|-----|-----|-----|-----|-----|-----|-----|-----|-----|-----|-----|-----|-----|-----|-----|-----|-----|-----|-----|-----|-----|-----|-----|-----|-----|-----|-----|-----|-----|-----|-----|-----|-----|-----|-----|-----|-----|-----|-----|-----|-----|-----|-----|-----|-----|-----|-----|-----|-----|-----|-----|-----|-----|-----|-----|-----|-----|-----|-----|-----|-----|-----|-----|-----|-----|-----|-----|-----|-----|-----|-----|-----|-----|-----|-----|-----|-----|-----|-----|-----|-----|-----|-----|-----|-----|-----|-----|-----|-----|-----|-----|-----|-----|-----|-----|-----|-----|-----|-----|-----|-----|-----|-----|-----|-----|-----|-----|-----|-----|-----|-----|-----|-----|-----|-----|-----|-----|-----|-----|-----|-----|-----|-----|-----|-----|-----|-----|-----|-----|-----|-----|-----|-----|-----|-----|-----|-----|-----|-----|-----|-----|-----|-----|-----|-----|-----|-----|-----|-----|-----|-----|-----|-----|-----|-----|-----|-----|-----|-----|-----|-----|-----|-----|-----|-----|-----|-----|-----|-----|-----|-----|-----|-----|-----|-----|-----|-----|-----|-----|-----|-----|-----|-----|-----|-----|-----|-----|-----|-----|-----|-----|-----|-----|-----|-----|-----|-----|-----|-----|-----|-----|-----|-----|-----|-----|-----|-----|-----|-----|-----|-----|-----|-----|-----|-----|-----|-----|-----|-----|-----|-----|-----|-----|-----|-----|-----|-----|-----|-----|-----|-----|-----|-----|-----|-----|-----|-----|-----|-----|-----|-----|-----|-----|-----|-----|-----|-----|-----|-----|-----|-----|-----|-----|-----|-----|-----|-----|-----|-----|-----|-----|-----|-----|-----|-----|-----|-----|-----|-----|-----|-----|-----|-----|-----|-----|-----|-----|-----|-----|-----|-----|-----|-----|-----|-----|-----|-----|-----|-----|-----|-----|-----|-----|-----|-----|-----|-----|-----|-----|-----|-----|-----|-----|-----|-----|-----|-----|-----|-----|-----|-----|-----|-----|-----|-----|-----|-----|-----|-----|-----|-----|-----|-----|-----|-----|-----|-----|-----|-----|-----|-----|-----|-----|-----|-----|-----|-----|-----|-----|-----|-----|-----|-----|-----|-----|-----|-----|-----|-----|-----|-----|-----|-----|-----|-----|-----|-----|-----|-----|-----|-----|-----|-----|-----|-----|-----|-----|-----|-----|-----|-----|-----|-----|-----|-----|-----|-----|-----|-----|-----|-----|-----|-----|-----|-----|-----|-----|-----|-----|-----|-----|-----|-----|-----|-----|-----|-----|-----|-----|-----|-----|-----|-----|-----|-----|-----|-----|-----|-----|-----|-----|-----|-----|-----|-----|-----|-----|-----|-----|-----|-----|-----|-----|-----|-----|-----|-----|-----|-----|-----|-----|-----|-----|-----|-----|-----|-----|-----|-----|-----|-----|-----|-----|-----|-----|-----|-----|-----|-----|-----|-----|-----|-----|-----|-----|-----|-----|-----|-----|-----|-----|-----|-----|-----|-----|-----|-----|-----|-----|-----|-----|-----|-----|-----|-----|-----|-----|-----|-----|-----|-----|-----|-----|-----|-----|-----|-----|-----|-----|-----|-----|-----|-----|-----|-----|-----|-----|-----|-----|-----|-----|-----|-----|-----|-----|-----|-----|-----|-----|-----|-----|-----|-----|-----|-----|-----|-----|-----|-----|-----|-----|-----|-----|-----|-----|-----|-----|-----|-----|-----|-----|-----|-----|-----|-----|-----|-----|-----|-----|-----|-----|-----|-----|-----|-----|-----|-----|-----|-----|-----|-----|-----|-----|-----|-----|-----|-----|-----|-----|-----|-----|-----|-----|-----|-----|-----|-----|-----|-----|-----|-----|-----|-----|-----|-----|-----|-----|-----|-----|-----|-----|-----|-----|-----|-----|-----|-----|-----|-----|-----|-----|-----|-----|-----|-----|-----|-----|-----|-----|-----|-----|-----|-----|-----|-----|-----|-----|-----|-----|-----|-----|-----|-----|-----|-----|-----|-----|-----|-----|-----|-----|-----|-----|

File: ISM\_10 (Online Resource)

Title: Comparative Multidimensional Molecular Analyses of Pediatric Diffuse Intrinsic Pontine Glioma Reveals Distinct Molecular Subtypes  
Journal: Acta Neuropathologica

Authors: Amanda M. Senn, Madhuri Kumbhakar, Kendall Snyder, Sidnei Yavine, Joe Deveney,

Brennan Harmon, Jordan Hall, Eric H. Raabe, Ping An, Melanie Weigant, Brian Reid, Sarah Magee, Roger J. Packer, Javad Nazarian

Corresponding Author:

Javad Nazarian, Children's National Medical Center, Center for Genetic Medicine

111 Michigan Ave., NW, Washington DC, 20010

Phone: 202-476-6022 Fax: 202-476-6014

Email: J.Nazarian@CNMC.org

| Gene ID            | FolChang[106] |           |                |          | FolChang[111] |           |                |          | FolChang[112] |           |                |          | FolChang[121] |           |                |          | FolChang[137] |           |                |          | FolChang[153] |           |                |          | FolChang[157] |           |                |          | FolChang[165] |           |                |           |         |      |    |
|--------------------|---------------|-----------|----------------|----------|---------------|-----------|----------------|----------|---------------|-----------|----------------|----------|---------------|-----------|----------------|----------|---------------|-----------|----------------|----------|---------------|-----------|----------------|----------|---------------|-----------|----------------|----------|---------------|-----------|----------------|-----------|---------|------|----|
|                    | p-value[106]  | MeanRatio | FoldChang[106] | n        | p-value[111]  | MeanRatio | FoldChang[111] | n        | p-value[112]  | MeanRatio | FoldChang[112] | n        | p-value[121]  | MeanRatio | FoldChang[121] | n        | p-value[137]  | MeanRatio | FoldChang[137] | n        | p-value[153]  | MeanRatio | FoldChang[153] | n        | p-value[157]  | MeanRatio | FoldChang[157] | n        | p-value[165]  | MeanRatio | FoldChang[165] | n         |         |      |    |
| LOC15843.1         | 1.2239        | 1.2239    | 10 up v n      | 0        | 17.1058       | 17.1058   | 111 up v n     | 0        | 2.2033        | 2.2033    | 112 up v n     | 0        | -0.92317      | -2.5486   | 121 down v n   | 0        | 1.5819        | 3.8739    | 137 up v n     | 1.9083   | 1.0102        | 10102     | 153 up v n     | 0        | -1.5064       | 1.5064    | 157 up v n     | 0        | 2.2434        | 2.2435    | 165 up v n     | 4.118E+15 | 268.72  | 5.68 | 14 |
| LOC15843.2         | 0.016823      | 1.99493   | 10 down v n    | 2        | 2.34635       | 2.34635   | 111 up v n     | 0        | -2.0787       | -2.0787   | 112 up v n     | 0        | 8.8036        | 8.8036    | 121 down v n   | 0        | 1.5819        | 3.8739    | 137 up v n     | 1.9083   | -12.153       | 12.153    | 153 down v n   | 0        | 8.3148        | 8.3148    | 157 up v n     | 0        | 1.73224       | 1.73224   | 165 up v n     | 1.888E+15 | 4.87    | 1.14 | 1  |
| LOC15843.3         | 0.000000      | 1.3451    | 10 down v n    | 0        | 0.44803       | 1.3451    | 111 down v n   | 0        | 0.44803       | 1.3451    | 112 down v n   | 0        | 0.44803       | 1.3451    | 121 down v n   | 0        | 0.44803       | 1.3451    | 137 down v n   | 0        | -0.00000      | 0.00000   | 153 down v n   | 0        | 0.44803       | 1.3451    | 157 down v n   | 0        | 1.4508        | 1.4508    | 165 down v n   | 1.888E+15 | 4.87    | 1.14 | 1  |
| LOC15843.4         | 0.141601      | -0.08912  | 10 down v n    | 0        | -0.99871      | -1.0013   | 111 down v n   | 0        | 0.68671       | -1.0013   | 112 down v n   | 0        | 0.52768       | -1.8924   | 121 down v n   | 0        | 0.3206        | -0.0386   | 137 down v n   | 0        | 1.3811        | 3.8691    | 153 up v n     | 0        | -1.7418       | 1.7418    | 157 up v n     | 0        | 0.31277       | 0.31277   | 165 up v n     | 2.85E+15  | 2.11    | 7.15 | 15 |
| LOC15835.0         | 1.7815        | 1.7815    | 10 up v n      | 0        | 1.9259        | 1.9259    | 111 down v n   | 0        | -0.29674      | -1.0788   | 112 down v n   | 0        | -0.29674      | -1.0788   | 121 down v n   | 0        | 0.3206        | -0.0386   | 137 down v n   | 0        | 1.5819        | 3.8739    | 153 down v n   | 1.40E+5  | 0.79783       | 1.2516    | 157 down v n   | 0        | 0.91705       | -1.6003   | 165 down v n   | 1.21E+15  | 0.8289  | 7.15 | 15 |
| LOC15835.1         | 0.01739       | 1.9259    | 10 up v n      | 0        | 1.9259        | 1.9259    | 111 down v n   | 0        | -0.29674      | -1.0788   | 112 down v n   | 0        | -0.29674      | -1.0788   | 121 down v n   | 0        | 0.3206        | -0.0386   | 137 down v n   | 0        | 1.5819        | 3.8739    | 153 down v n   | 1.40E+5  | 0.79783       | 1.2516    | 157 down v n   | 0        | 0.91705       | -1.6003   | 165 down v n   | 1.21E+15  | 0.8289  | 7.15 | 15 |
| LOC15836.0         | -0.526137     | -1.90064  | 10 down v n    | 0        | -0.30764      | -3.0929   | 111 down v n   | 0        | -0.22349      | -4.7329   | 112 down v n   | 0        | 1.60926       | 1.60926   | 121 down v n   | 0        | 7.8032        | 7.8032    | 137 up v n     | 0        | 2.72769       | 2.72769   | 153 up v n     | 0        | 2.386         | 2.386     | 157 up v n     | 0        | 0.60171       | -1.69314  | 165 down v n   | 7         | 54.878  | 0    | 1  |
| LOC15836.2         | 0.40716       | -2.65604  | 10 down v n    | 4.8E-44  | 0.68673       | -1.9498   | 111 down v n   | 0        | 4.80845       | 4.80845   | 112 up v n     | 0        | 0.22997       | -3.4902   | 121 down v n   | 8.5E-35  | 1.70512       | 1.70512   | 137 up v n     | 0        | 15.1022       | 15.1022   | 153 down v n   | 0        | 3.4474        | 3.4474    | 157 up v n     | 0        | -0.346517     | -2.4336   | 165 down v n   | 3.53E+15  | 2.2948  | 5.68 | 14 |
| LOC15837.0         | 0.000000      | 1.3451    | 10 down v n    | 0        | 0.44803       | 1.3451    | 111 down v n   | 0        | 0.44803       | 1.3451    | 112 down v n   | 0        | 0.44803       | 1.3451    | 121 down v n   | 0        | 0.44803       | 1.3451    | 137 down v n   | 0        | -0.00000      | 0.00000   | 153 down v n   | 0        | 0.44803       | 1.3451    | 157 down v n   | 0        | 1.4508        | 1.4508    | 165 down v n   | 1.888E+15 | 4.87    | 1.14 | 1  |
| LOC15837.1         | 3.3705        | 3.3705    | 10 up v n      | 3.18E-37 | -0.110399     | -0.07446  | 111 down v n   | 6.20E-36 | 1.73639       | 1.73639   | 112 up v n     | 0        | -533.75       | 533.75    | 121 up v n     | 1.94E-35 | 0.383005      | -61.093   | 137 down v n   | 9.72E-35 | 1.49021       | 1.49021   | 153 up v n     | 6.14E-39 | 0.95125       | -10.525   | 157 down v n   | 2.03E-35 | 0.386973      | -2.5853   | 165 down v n   | 4.03E+15  | 2.0805  | 5.82 | 11 |
| LOC15837.1580      | 0.29344       | -4.0015   | 10 down v n    | 0        | 0.29345       | 0.29345   | 111 up v n     | 0        | 1.74103       | 1.74103   | 112 down v n   | 0        | 0.766314      | -1.30461  | 121 down v n   | 0        | 0.766314      | -1.30461  | 137 down v n   | 0        | 1.49021       | 1.49021   | 153 down v n   | 0        | 1.80436       | 1.80436   | 157 up v n     | 0        | 1.4289        | 1.4289    | 165 up v n     | 7         | 11.668  | 0    | 1  |
| LOC15837.1581      | 0.000000      | 1.3451    | 10 down v n    | 0        | 0.44803       | 1.3451    | 111 down v n   | 0        | 0.44803       | 1.3451    | 112 down v n   | 0        | 0.44803       | 1.3451    | 121 down v n   | 0        | 0.44803       | 1.3451    | 137 down v n   | 0        | -0.00000      | 0.00000   | 153 down v n   | 0        | 0.44803       | 1.3451    | 157 down v n   | 0        | 1.4508        | 1.4508    | 165 down v n   | 1.888E+15 | 4.87    | 1.14 | 1  |
| LOC15836.917E.38   | 1.0828        | 1.0828    | 10 down v n    | 0        | -2.9574       | 2.9574    | 111 down v n   | 4.21E-41 | 1.48135       | 1.48135   | 112 down v n   | 0        | -0.581004     | -1.7216   | 121 down v n   | 0        | 32.63         | 32.63     | 137 up v n     | 0        | 21.6267       | 21.6267   | 153 up v n     | 0        | 2.11743       | 2.11743   | 157 up v n     | 1.40E+5  | -1.7437       | -5.7493   | 165 down v n   | 5.97E+15  | 155.22  | 2.27 | 13 |
| LOC15837.0         | -1.62739      | 1.62739   | 10 up v n      | 0        | -0.467064     | -1.21404  | 111 down v n   | 8.28E-41 | 0.934617      | -1.07407  | 112 down v n   | 0        | -0.560254     | -1.7849   | 121 down v n   | 0        | 7.76927       | 7.76927   | 137 down v n   | 0        | -0.129171     | -7.7094   | 153 down v n   | 0        | 0.279534      | 0.279534  | 157 down v n   | 0        | 0.34039       | 0.34039   | 165 up v n     | 5.18E+15  | 0.80722 | 1.42 | 14 |
| LOC15837.701E.45   | 1.2917        | -1.64348  | 10 up v n      | 0        | -0.60753      | 1.6475    | 111 up v n     | 0        | -1.27769      | 1.27769   | 112 up v n     | 0        | -1.11818      | 1.11818   | 121 up v n     | 0        | -1.05842      | 1.05842   | 137 up v n     | 0        | 6.4709        | 6.4709    | 153 up v n     | 0        | -0.382687     | -2.9306   | 157 down v n   | 0        | -0.047674     | -2.5153   | 165 down v n   | 3.04E+15  | 3.8672  | 2.84 | 14 |
| LOC15837.701E.46   | 1.2917        | -1.64348  | 10 up v n      | 0        | -0.60753      | 1.6475    | 111 up v n     | 0        | -1.27769      | 1.27769   | 112 up v n     | 0        | -1.11818      | 1.11818   | 121 up v n     | 0        | -1.05842      | 1.05842   | 137 up v n     | 0        | 6.4709        | 6.4709    | 153 up v n     | 0        | -0.382687     | -2.9306   | 157 down v n   | 0        | -0.047674     | -2.5153   | 165 down v n   | 3.04E+15  | 3.8672  | 2.84 | 14 |
| LOC15840.0         | 1.2976        | 1.2976    | 10 up v n      | 5.78E-43 | 0.942614      | -1.06088  | 111 down v n   | 3.96E-44 | 0.925706      | -1.08026  | 112 down v n   | 0        | -0.575167     | -1.3703   | 121 down v n   | 0        | 0.0525981     | -0.1021   | 137 down v n   | 0        | -1.02306      | 1.02306   | 153 up v n     | 0        | 0.725515      | 1.79383   | 157 down v n   | 0        | -1.76525      | 1.76525   | 165 up v n     | 3.38E+15  | 1.37    | 3.66 | 14 |
| LOC15840.1         | 0.797136      | -1.28347  | 10 up v n      | 0        | 0.232374      | -4.30341  | 111 down v n   | 0        | -0.44872      | -2.0624   | 112 down v n   | 0        | 0.303058      | -2.7548   | 121 down v n   | 0        | 1.19324       | 1.19324   | 137 up v n     | 5.61E+45 | 0.843195      | -1.8992   | 153 down v n   | 0        | 1.5758        | 1.5758    | 157 up v n     | 4.20E+5  | 0.84979       | -1.9178   | 165 down v n   | 4.13E+15  | 4.3009  | 7.15 | 15 |
| LOC15840.4         | 0.000000      | 1.3451    | 10 down v n    | 0        | 0.44803       | 1.3451    | 111 down v n   | 0        | 0.44803       | 1.3451    | 112 down v n   | 0        | 0.44803       | 1.3451    | 121 down v n   | 0        | 0.44803       | 1.3451    | 137 down v n   | 0        | -0.00000      | 0.00000   | 153 down v n   | 0        | 0.44803       | 1.3451    | 157 down v n   | 0        | 1.4508        | 1.4508    | 165 down v n   | 1.888E+15 | 4.87    | 1.14 | 1  |
| LOC15840.4.987E.48 | 0.787588      | -1.2697   | 10 down v n    | 3.78E-44 | 0.688639      | -1.62124  | 111 down v n   | 2.30E-43 | 1.26163       | 1.26163   | 112 down v n   | 0        | 0.303058      | -2.7548   | 121 down v n   | 1.88E-40 | 0.898888      | -1.1156   | 137 down v n   | 0        | 0.28753       | -3.8992   | 153 down v n   | 0        | -15.635       | 15.635    | 157 up v n     | 2.82E+5  | 1.2402        | 1.2402    | 165 up v n     | 4.02E+15  | 2.6359  | 5.68 | 14 |
| LOC15840.7         | -11.5363      | 13.5363   | 10 up v n      | 0        | 2.18125       | 2.18125   | 111 down v n   | 0        | -0.39604      | -2.5253   | 112 down v n   | 0        | -0.188121     | 1.98811   | 121 down v n   | 0        | 0.82261       | 1.98811   | 137 down v n   | 0        | -0.82261      | 1.98811   | 153 down v n   | 0        | 0.50817       | 0.50817   | 157 up v n     | 0        | 0.134765      | -7.00548  | 165 down v n   | 3.86E+15  | 2.505   | 5.68 | 14 |
| LOC15841.0         | 0.000000      | 1.3451    | 10 down v n    | 0        | 0.44803       | 1.3451    | 111 down v n   | 0        | 0.44803       | 1.3451    | 112 down v n   | 0        | 0.44803       | 1.3451    | 121 down v n   | 0        | 0.44803       | 1.3451    | 137 down v n   | 0        | -0.00000      | 0.00000   | 153 down v n   | 0        | 0.44803       | 1.3451    | 157 down v n   | 0        | 1.4508        | 1.4508    | 165 down v n   | 1.888E+15 | 4.87    | 1.14 | 1  |
| LOC15842.0         | 2.01503       | 2.01503   | 10 up v n      | 0        | -0.92491      | -1.1119   | 111 down v n   | 0        | -0.025268     | -39.5933  | 112 down v n   | 0        | -0.99402      | -4.5492   | 121 up v n     | 0        | 1.17441       | 1.17441   | 137 up v n     | 0        | 0.78987       | 7.8987    | 153 up v n     | 0        | 3.78987       | 3.78987   | 157 up v n     | 0        | 0.34039       | 0.34039   | 165 up v n     | 5.18E+15  | 0.80722 | 1.42 | 14 |
| LOC15842.9.81E.45  | 0.42348       | -2.36139  | 10 down v n    | 0.80E-41 | 0.842561      | -1.18686  | 111 down v n   | 0        | 26.839        | 26.839    | 112 up v n     | 4.20E+45 | 0.35031       | -2.8544   | 121 down v n   | 2.80E+45 | 0.28331       | -3.5294   | 137 down v n   | 0        | 0.40443       | 7.1103    | 153 down v n   | 0        | 0.47742       | 0.47742   | 157 up v n     | 4.77E+41 | 1.7021        | 1.7021    | 165 up v n     | 4.92E+15  | 0.68868 | 1.14 | 11 |
| LOC15843.0         | 0.000000      | 1.3451    | 10 down v n    | 0        | 0.44803       | 1.3451    | 111 down v n   | 0        | 0.44803       | 1.3451    | 112 down v n   | 0        | 0.44803       | 1.3451    | 121 down v n   | 0        | 0.44803       | 1.3451    | 137 down v n   | 0        | -0.00000      | 0.00000   | 153 down v n   | 0        | 0.44803       | 1.3451    | 157 down v n   | 0        | 1.4508        | 1.4508    | 165 down v n   | 1.888E+15 | 4.87    | 1.14 | 1  |
| LOC15843.6         | 1.94402       | -5.14398  | 10 down v n    | 0        | 2.26604       | 2.26604   | 111 down v n   | 0        | 2.00948       | 2.00948   | 112 up v n     | 4.40E+45 | 0.806254      | -1.2403   | 121 down v n   | 0        | 0.363405      | -2.7515   | 137 down v n   | 0        | 1.4924        | 1.4924    | 153 down v n   | 0        | 2.4854        | 2.4854    | 157 up v n     | 0        | 1.8121        | 1.8121    | 165 up v n     | 7.61E+15  | 0.84    | 1.14 | 11 |
| LOC15844.0         | 0.325075      | -3.07149  | 10 down v n    | 0        | 0.62511       | -61.3737  | 111 down v n   | 0        | 2.6251        | 2.6251    | 112 up v n     | 0        | 0.015996      | -69.697   | 121 down v n   | 0        | 0.370991      | -2.69548  | 137 down v n   | 0        | 29.6131       | 29.613    | 153 up v n     | 0        | 321.206       | 321.206   | 157 up v n     | 0        | 2.0811        | 2.0811    | 165 up v n     | 7         | 163790  | 0    | 1  |
| LOC15844.1         | 0.000000      | 1.3451    | 10 down v n    | 0        | 0.44803       | 1.3451    | 111 down v n   | 0        | 0.44803       | 1.3451    | 112 down v n   | 0        | 0.44803       | 1.3451    | 121 down v n   | 0        | 0.44803       | 1.3451    | 137 down v n   | 0        | -0.00000      | 0.00000   | 153 down v n   | 0        | 0.44803       | 1.3451    | 157 down v n   | 0        | 1.4508        | 1.4508    | 165 down v n   | 1.888E+15 | 4.87    | 1.14 | 1  |
| LOC15844.1         | 0.000000      | 1.3451    | 10 down v n    | 0        | 0.44803       | 1.3451    | 111 down v n   | 0        | 0.44803       | 1.3451    | 112 down v n   | 0        | 0.44803       | 1.3451    | 121 down v n   | 0        | 0.44803       | 1.3451    | 137 down v n   | 0        | -0.00000      | 0.00000   | 153 down v n   | 0        | 0.44803       | 1.3451    | 157 down v n   | 0        | 1.4508        | 1.4508    | 165 down v n   | 1.888E+15 | 4.87    | 1.14 | 1  |
| LOC15844.1         | 0.000000      | 1.3451    | 10 down v n    | 0        | 0.44803       | 1.3451    | 111 down v n   | 0        | 0.44803       | 1.3451    | 112 down v n   | 0        | 0.44803       | 1.3451    | 121 down v n   | 0        | 0.44803       | 1.3451    | 137 down v n   | 0        | -0.00000      | 0.00000   | 153 down v n   | 0        | 0.44803       | 1.3451    | 157 down v n   | 0        | 1.4508        | 1.4508    | 165 down v n   | 1.888E+15 | 4.87    | 1.14 | 1  |
| LOC15844.1         | 0.000000      | 1.3451    | 10 down v n    | 0        | 0.44803       | 1.3451    | 111 down v n   | 0        | 0.44803       | 1.3451    | 112 down v n   | 0        | 0.44803       | 1.3451    | 121 down v n   | 0        | 0.44803       | 1.3451    | 137 down v n   | 0        | -0.00000      | 0.00000   | 153 down v n   | 0        | 0.44803       | 1.3451    | 157 down v n   | 0        | 1.4508        | 1.4508    | 165 down v n   | 1.888E+15 | 4.87    | 1.14 | 1  |
| LOC15844.1         | 0.000000      | 1.3451    | 10 down v n    | 0        | 0.44803       | 1.3451    | 111 down v n   | 0        | 0.44803       | 1.3451    | 112 down v n   | 0        | 0.44803       | 1.3451    | 121 down v n   | 0        | 0.44803       | 1.3451    | 137 down v n   | 0        | -0.00000      | 0.00000   | 153 down v n   | 0</      |               |           |                |          |               |           |                |           |         |      |    |











**Title:** Comparative Multidimensional Molecular Analyses of Pediatric Diffuse Intrinsic Pontine Glioma Reveals Distinct Molecular Subtypes  
**Journal:** Acta Neuropathologica

Javad Nazarian, Children's National Medical Center, Center for Genetic Medicine

Phone: 202-476-6022 Fax: 202-476-6014  
E-mail: [DMcConnell@CMBAC.com](mailto:DMcConnell@CMBAC.com)

| n | FoldChange[10] | n | FoldChange[111] | n |
|---|----------------|---|-----------------|---|
|---|----------------|---|-----------------|---|

| Gene ID | Value | FoldeChange10 |  |  | Description | FoldeChange11 |  |  | Description | FoldeChange12 |  |  | Description | FoldeChange13 |  |  | Description | FoldeChange14 |  |  | Description | FoldeChange15 |  |  | Description | FoldeChange16 |  |  | Description | FoldeChange17 |  |  | Description | FoldeChange18 |  |  | Description | FoldeChange19 |  |  | Description | FoldeChange20 |  |  | Description | FoldeChange21 |  |  | Description | FoldeChange22 |  |  | Description | FoldeChange23 |  |  | Description | FoldeChange24 |  |  | Description | FoldeChange25 |  |  | Description | FoldeChange26 |  |  | Description | FoldeChange27 |  |  | Description | FoldeChange28 |  |  | Description | FoldeChange29 |  |  | Description | FoldeChange30 |  |  | Description | FoldeChange31 |  |  | Description | FoldeChange32 |  |  | Description | FoldeChange33 |  |  | Description | FoldeChange34 |  |  | Description | FoldeChange35 |  |  | Description | FoldeChange36 |  |  | Description | FoldeChange37 |  |  | Description | FoldeChange38 |  |  | Description | FoldeChange39 |  |  | Description | FoldeChange40 |  |  | Description | FoldeChange41 |  |  | Description | FoldeChange42 |  |  | Description | FoldeChange43 |  |  | Description | FoldeChange44 |  |  | Description | FoldeChange45 |  |  | Description | FoldeChange46 |  |  | Description | FoldeChange47 |  |  | Description | FoldeChange48 |  |  | Description | FoldeChange49 |  |  | Description | FoldeChange50 |  |  | Description | FoldeChange51 |  |  | Description | FoldeChange52 |  |  | Description | FoldeChange53 |  |  | Description | FoldeChange54 |  |  | Description | FoldeChange55 |  |  | Description | FoldeChange56 |  |  | Description | FoldeChange57 |  |  | Description | FoldeChange58 |  |  | Description | FoldeChange59 |  |  | Description | FoldeChange60 |  |  | Description | FoldeChange61 |  |  | Description | FoldeChange62 |  |  | Description | FoldeChange63 |  |  | Description | FoldeChange64 |  |  | Description | FoldeChange65 |  |  | Description | FoldeChange66 |  |  | Description | FoldeChange67 |  |  | Description | FoldeChange68 |  |  | Description | FoldeChange69 |  |  | Description | FoldeChange70 |  |  | Description | FoldeChange71 |  |  | Description | FoldeChange72 |  |  | Description | FoldeChange73 |  |  | Description | FoldeChange74 |  |  | Description | FoldeChange75 |  |  | Description | FoldeChange76 |  |  | Description | FoldeChange77 |  |  | Description | FoldeChange78 |  |  | Description | FoldeChange79 |  |  | Description | FoldeChange80 |  |  | Description | FoldeChange81 |  |  | Description | FoldeChange82 |  |  | Description | FoldeChange83 |  |  | Description | FoldeChange84 |  |  | Description | FoldeChange85 |  |  | Description | FoldeChange86 |  |
|---------|-------|---------------|--|--|-------------|---------------|--|--|-------------|---------------|--|--|-------------|---------------|--|--|-------------|---------------|--|--|-------------|---------------|--|--|-------------|---------------|--|--|-------------|---------------|--|--|-------------|---------------|--|--|-------------|---------------|--|--|-------------|---------------|--|--|-------------|---------------|--|--|-------------|---------------|--|--|-------------|---------------|--|--|-------------|---------------|--|--|-------------|---------------|--|--|-------------|---------------|--|--|-------------|---------------|--|--|-------------|---------------|--|--|-------------|---------------|--|--|-------------|---------------|--|--|-------------|---------------|--|--|-------------|---------------|--|--|-------------|---------------|--|--|-------------|---------------|--|--|-------------|---------------|--|--|-------------|---------------|--|--|-------------|---------------|--|--|-------------|---------------|--|--|-------------|---------------|--|--|-------------|---------------|--|--|-------------|---------------|--|--|-------------|---------------|--|--|-------------|---------------|--|--|-------------|---------------|--|--|-------------|---------------|--|--|-------------|---------------|--|--|-------------|---------------|--|--|-------------|---------------|--|--|-------------|---------------|--|--|-------------|---------------|--|--|-------------|---------------|--|--|-------------|---------------|--|--|-------------|---------------|--|--|-------------|---------------|--|--|-------------|---------------|--|--|-------------|---------------|--|--|-------------|---------------|--|--|-------------|---------------|--|--|-------------|---------------|--|--|-------------|---------------|--|--|-------------|---------------|--|--|-------------|---------------|--|--|-------------|---------------|--|--|-------------|---------------|--|--|-------------|---------------|--|--|-------------|---------------|--|--|-------------|---------------|--|--|-------------|---------------|--|--|-------------|---------------|--|--|-------------|---------------|--|--|-------------|---------------|--|--|-------------|---------------|--|--|-------------|---------------|--|--|-------------|---------------|--|--|-------------|---------------|--|--|-------------|---------------|--|--|-------------|---------------|--|--|-------------|---------------|--|--|-------------|---------------|--|--|-------------|---------------|--|--|-------------|---------------|--|--|-------------|---------------|--|--|-------------|---------------|--|--|-------------|---------------|--|--|-------------|---------------|--|--|-------------|---------------|--|
|---------|-------|---------------|--|--|-------------|---------------|--|--|-------------|---------------|--|--|-------------|---------------|--|--|-------------|---------------|--|--|-------------|---------------|--|--|-------------|---------------|--|--|-------------|---------------|--|--|-------------|---------------|--|--|-------------|---------------|--|--|-------------|---------------|--|--|-------------|---------------|--|--|-------------|---------------|--|--|-------------|---------------|--|--|-------------|---------------|--|--|-------------|---------------|--|--|-------------|---------------|--|--|-------------|---------------|--|--|-------------|---------------|--|--|-------------|---------------|--|--|-------------|---------------|--|--|-------------|---------------|--|--|-------------|---------------|--|--|-------------|---------------|--|--|-------------|---------------|--|--|-------------|---------------|--|--|-------------|---------------|--|--|-------------|---------------|--|--|-------------|---------------|--|--|-------------|---------------|--|--|-------------|---------------|--|--|-------------|---------------|--|--|-------------|---------------|--|--|-------------|---------------|--|--|-------------|---------------|--|--|-------------|---------------|--|--|-------------|---------------|--|--|-------------|---------------|--|--|-------------|---------------|--|--|-------------|---------------|--|--|-------------|---------------|--|--|-------------|---------------|--|--|-------------|---------------|--|--|-------------|---------------|--|--|-------------|---------------|--|--|-------------|---------------|--|--|-------------|---------------|--|--|-------------|---------------|--|--|-------------|---------------|--|--|-------------|---------------|--|--|-------------|---------------|--|--|-------------|---------------|--|--|-------------|---------------|--|--|-------------|---------------|--|--|-------------|---------------|--|--|-------------|---------------|--|--|-------------|---------------|--|--|-------------|---------------|--|--|-------------|---------------|--|--|-------------|---------------|--|--|-------------|---------------|--|--|-------------|---------------|--|--|-------------|---------------|--|--|-------------|---------------|--|--|-------------|---------------|--|--|-------------|---------------|--|--|-------------|---------------|--|--|-------------|---------------|--|--|-------------|---------------|--|--|-------------|---------------|--|--|-------------|---------------|--|--|-------------|---------------|--|--|-------------|---------------|--|--|-------------|---------------|--|--|-------------|---------------|--|--|-------------|---------------|--|--|-------------|---------------|--|







**File:** ISM\_10 (On-line Release) **File:** ISM\_10 (On-line Release)

**Figure:** Comparative Multidimensional Molecular Analyses of Pediatric Diffuse Intrinsic Tumors: Gene Clusters Reveal Distinct Molecular Subtypes

**Journal:** Acta Neurochirurgica

**Authors:** Amanda M. Senn, Madhuri Kumbhakar, Kendall Snyder, Sidney Yustine, Joe Deveney, Brennan Harmon, Jordan Hall, Elie Reube, Ping An, Melanie Weigant, Brian Ross, Sarah Magee, Roger J. Packer, Javad Nazarian

**Corresponding Author:** Javad Nazarian, Children's National Medical Center, Center for Genetic Medicine, 111 Michigan Ave., NW, Washington DC, 20010

**Phone:** 202-476-6022, Fax: 202-476-6011

**Email:** J.Nazarian@CNMC.org

| Gene ID | P-value | FolChang106 |  |  | p-value | FolChang107 |  |  | p-value | FolChang108 |  |  | p-value | FolChang109 |  |  | p-value | FolChang110 |  |  | p-value | FolChang111 |  |  | p-value | FolChang112 |  |  | p-value | FolChang113 |  |  | p-value | FolChang114 |  |  | p-value | FolChang115 |  |  | p-value | FolChang116 |  |  | p-value | FolChang117 |  |  | p-value | FolChang118 |  |  | p-value | FolChang119 |  |  | p-value | FolChang120 |  |  | p-value | FolChang121 |  |  | p-value | FolChang122 |  |  | p-value | FolChang123 |  |  | p-value | FolChang124 |  |  | p-value | FolChang125 |  |  | p-value | FolChang126 |  |  | p-value | FolChang127 |  |  | p-value | FolChang128 |  |  | p-value | FolChang129 |  |  | p-value | FolChang130 |  |  | p-value | FolChang131 |  |  | p-value | FolChang132 |  |  | p-value | FolChang133 |  |  | p-value | FolChang134 |  |  | p-value | FolChang135 |  |  | p-value | FolChang136 |  |  | p-value | FolChang137 |  |  | p-value | FolChang138 |  |  | p-value | FolChang139 |  |  | p-value | FolChang140 |  |  | p-value | FolChang141 |  |  | p-value | FolChang142 |  |  | p-value | FolChang143 |  |  | p-value | FolChang144 |  |  | p-value | FolChang145 |  |  | p-value | FolChang146 |  |  | p-value | FolChang147 |  |  | p-value | FolChang148 |  |  | p-value | FolChang149 |  |  | p-value | FolChang150 |  |  | p-value | FolChang151 |  |  | p-value | FolChang152 |  |  | p-value | FolChang153 |  |  | p-value | FolChang154 |  |  | p-value | FolChang155 |  |  | p-value | FolChang156 |  |  | p-value | FolChang157 |  |  | p-value | FolChang158 |  |  | p-value | FolChang159 |  |  | p-value | FolChang160 |  |  | p-value | FolChang161 |  |  | p-value | FolChang162 |  |  | p-value | FolChang163 |  |  | p-value | FolChang164 |  |  | p-value | FolChang165 |  |  | p-value | FolChang166 |  |  | p-value | FolChang167 |  |  | p-value | FolChang168 |  |  | p-value | FolChang169 |  |  | p-value | FolChang170 |  |  | p-value | FolChang171 |  |  | p-value | FolChang172 |  |  | p-value | FolChang173 |  |  | p-value | FolChang174 |  |  | p-value | FolChang175 |  |  | p-value | FolChang176 |  |  | p-value | FolChang177 |  |  | p-value | FolChang178 |  |  | p-value | FolChang179 |  |  | p-value | FolChang180 |  |  | p-value | FolChang181 |  |  | p-value | FolChang182 |  |  | p-value | FolChang183 |  |  | p-value | FolChang184 |  |  | p-value | FolChang185 |  |  | p-value | FolChang186 |  |  | p-value | FolChang187 |  |  | p-value | FolChang188 |  |  | p-value | FolChang189 |  |  | p-value | FolChang190 |  |  | p-value | FolChang191 |  |  | p-value | FolChang192 |  |  | p-value | FolChang193 |  |  | p-value | FolChang194 |  |  | p-value | FolChang195 |  |  | p-value | FolChang196 |  |  | p-value | FolChang197 |  |  | p-value | FolChang198 |  |  | p-value | FolChang199 |  |  | p-value | FolChang200 |  |  | p-value | FolChang201 |  |  | p-value | FolChang202 |  |  | p-value | FolChang203 |  |  | p-value | FolChang204 |  |  | p-value | FolChang205 |  |  | p-value | FolChang206 |  |  | p-value | FolChang207 |  |  | p-value | FolChang208 |  |  | p-value | FolChang209 |  |  | p-value | FolChang210 |  |  | p-value | FolChang211 |  |  | p-value | FolChang212 |  |  | p-value | FolChang213 |  |  | p-value | FolChang214 |  |  | p-value | FolChang215 |  |  | p-value | FolChang216 |  |  | p-value | FolChang217 |  |  | p-value | FolChang218 |  |  | p-value | FolChang219 |  |  | p-value | FolChang220 |  |  | p-value | FolChang221 |  |  | p-value | FolChang222 |  |  | p-value | FolChang223 |  |  | p-value | FolChang224 |  |  | p-value | FolChang225 |  |  | p-value | FolChang226 |  |  | p-value | FolChang227 |  |  | p-value | FolChang228 |  |  | p-value | FolChang229 |  |  | p-value | FolChang230 |  |  | p-value | FolChang231 |  |  | p-value | FolChang232 |  |  | p-value | FolChang233 |  |  | p-value | FolChang234 |  |  | p-value | FolChang235 |  |  | p-value | FolChang236 |  |  | p-value | FolChang237 |  |  | p-value | FolChang238 |  |  | p-value | FolChang239 |  |  | p-value | FolChang240 |  |  | p-value | FolChang241 |  |  | p-value | FolChang242 |  |  | p-value | FolChang243 |  |  | p-value | FolChang244 |  |  | p-value | FolChang245 |  |  | p-value | FolChang246 |  |  | p-value | FolChang247 |  |  | p-value | FolChang248 |  |  | p-value | FolChang249 |  |  | p-value | FolChang250 |  |  | p-value | FolChang251 |  |  | p-value | FolChang252 |  |  | p-value | FolChang253 |  |  | p-value | FolChang254 |  |  | p-value | FolChang255 |  |  | p-value | FolChang256 |  |  | p-value | FolChang257 |  |  | p-value | FolChang258 |  |  | p-value | FolChang259 |  |  | p-value | FolChang260 |  |  | p-value | FolChang261 |  |  | p-value | FolChang262 |  |  | p-value | FolChang263 |  |  | p-value | FolChang264 |  |  | p-value | FolChang265 |  |  | p-value | FolChang266 |  |  | p-value | FolChang267 |  |  | p-value | FolChang268 |  |  | p-value | FolChang269 |  |  | p-value | FolChang270 |  |  | p-value | FolChang271 |  |  | p-value | FolChang272 |  |  | p-value | FolChang273 |  |  | p-value | FolChang274 |  |  | p-value | FolChang275 |  |  | p-value | FolChang276 |  |  | p-value | FolChang277 |  |  | p-value | FolChang278 |  |  | p-value | FolChang279 |  |  | p-value | FolChang280 |  |  | p-value | FolChang281 |  |  | p-value | FolChang282 |  |  | p-value | FolChang283 |  |  | p-value | FolChang284 |  |  | p-value | FolChang285 |  |  | p-value | FolChang286 |  |  | p-value | FolChang287 |  |  | p-value | FolChang288 |  |  | p-value | FolChang289 |  |  | p-value | FolChang290 |  |  | p-value | FolChang291 |  |  | p-value | FolChang292 |  |  | p-value | FolChang293 |  |  | p-value | FolChang294 |  |  | p-value | FolChang295 |  |  | p-value | FolChang296 |  |  | p-value | FolChang297 |  |  | p-value | FolChang298 |  |  | p-value | FolChang299 |  |  | p-value | FolChang300 |  |  | p-value | FolChang301 |  |  | p-value | FolChang302 |  |  | p-value | FolChang303 |  |  | p-value | FolChang304 |  |  | p-value | FolChang305 |  |  | p-value | FolChang306 |  |  | p-value | FolChang307 |  |  | p-value | FolChang308 |  |  | p-value | FolChang309 |  |  | p-value | FolChang310 |  |  | p-value | FolChang311 |  |  | p-value | FolChang312 |  |  | p-value | FolChang313 |  |  | p-value | FolChang314 |  |  | p-value | FolChang315 |  |  | p-value | FolChang316 |  |  | p-value | FolChang317 |  |  | p-value | FolChang318 |  |  | p-value | FolChang319 |  |  | p-value | FolChang320 |  |  | p-value | FolChang321 |  |  |
|---------|---------|-------------|--|--|---------|-------------|--|--|---------|-------------|--|--|---------|-------------|--|--|---------|-------------|--|--|---------|-------------|--|--|---------|-------------|--|--|---------|-------------|--|--|---------|-------------|--|--|---------|-------------|--|--|---------|-------------|--|--|---------|-------------|--|--|---------|-------------|--|--|---------|-------------|--|--|---------|-------------|--|--|---------|-------------|--|--|---------|-------------|--|--|---------|-------------|--|--|---------|-------------|--|--|---------|-------------|--|--|---------|-------------|--|--|---------|-------------|--|--|---------|-------------|--|--|---------|-------------|--|--|---------|-------------|--|--|---------|-------------|--|--|---------|-------------|--|--|---------|-------------|--|--|---------|-------------|--|--|---------|-------------|--|--|---------|-------------|--|--|---------|-------------|--|--|---------|-------------|--|--|---------|-------------|--|--|---------|-------------|--|--|---------|-------------|--|--|---------|-------------|--|--|---------|-------------|--|--|---------|-------------|--|--|---------|-------------|--|--|---------|-------------|--|--|---------|-------------|--|--|---------|-------------|--|--|---------|-------------|--|--|---------|-------------|--|--|---------|-------------|--|--|---------|-------------|--|--|---------|-------------|--|--|---------|-------------|--|--|---------|-------------|--|--|---------|-------------|--|--|---------|-------------|--|--|---------|-------------|--|--|---------|-------------|--|--|---------|-------------|--|--|---------|-------------|--|--|---------|-------------|--|--|---------|-------------|--|--|---------|-------------|--|--|---------|-------------|--|--|---------|-------------|--|--|---------|-------------|--|--|---------|-------------|--|--|---------|-------------|--|--|---------|-------------|--|--|---------|-------------|--|--|---------|-------------|--|--|---------|-------------|--|--|---------|-------------|--|--|---------|-------------|--|--|---------|-------------|--|--|---------|-------------|--|--|---------|-------------|--|--|---------|-------------|--|--|---------|-------------|--|--|---------|-------------|--|--|---------|-------------|--|--|---------|-------------|--|--|---------|-------------|--|--|---------|-------------|--|--|---------|-------------|--|--|---------|-------------|--|--|---------|-------------|--|--|---------|-------------|--|--|---------|-------------|--|--|---------|-------------|--|--|---------|-------------|--|--|---------|-------------|--|--|---------|-------------|--|--|---------|-------------|--|--|---------|-------------|--|--|---------|-------------|--|--|---------|-------------|--|--|---------|-------------|--|--|---------|-------------|--|--|---------|-------------|--|--|---------|-------------|--|--|---------|-------------|--|--|---------|-------------|--|--|---------|-------------|--|--|---------|-------------|--|--|---------|-------------|--|--|---------|-------------|--|--|---------|-------------|--|--|---------|-------------|--|--|---------|-------------|--|--|---------|-------------|--|--|---------|-------------|--|--|---------|-------------|--|--|---------|-------------|--|--|---------|-------------|--|--|---------|-------------|--|--|---------|-------------|--|--|---------|-------------|--|--|---------|-------------|--|--|---------|-------------|--|--|---------|-------------|--|--|---------|-------------|--|--|---------|-------------|--|--|---------|-------------|--|--|---------|-------------|--|--|---------|-------------|--|--|---------|-------------|--|--|---------|-------------|--|--|---------|-------------|--|--|---------|-------------|--|--|---------|-------------|--|--|---------|-------------|--|--|---------|-------------|--|--|---------|-------------|--|--|---------|-------------|--|--|---------|-------------|--|--|---------|-------------|--|--|---------|-------------|--|--|---------|-------------|--|--|---------|-------------|--|--|---------|-------------|--|--|---------|-------------|--|--|---------|-------------|--|--|---------|-------------|--|--|---------|-------------|--|--|---------|-------------|--|--|---------|-------------|--|--|---------|-------------|--|--|---------|-------------|--|--|---------|-------------|--|--|---------|-------------|--|--|---------|-------------|--|--|---------|-------------|--|--|---------|-------------|--|--|---------|-------------|--|--|---------|-------------|--|--|---------|-------------|--|--|---------|-------------|--|--|---------|-------------|--|--|---------|-------------|--|--|---------|-------------|--|--|---------|-------------|--|--|---------|-------------|--|--|---------|-------------|--|--|---------|-------------|--|--|---------|-------------|--|--|---------|-------------|--|--|---------|-------------|--|--|---------|-------------|--|--|---------|-------------|--|--|---------|-------------|--|--|---------|-------------|--|--|---------|-------------|--|--|---------|-------------|--|--|---------|-------------|--|--|---------|-------------|--|--|---------|-------------|--|--|---------|-------------|--|--|---------|-------------|--|--|---------|-------------|--|--|---------|-------------|--|--|---------|-------------|--|--|---------|-------------|--|--|---------|-------------|--|--|---------|-------------|--|--|---------|-------------|--|--|---------|-------------|--|--|---------|-------------|--|--|---------|-------------|--|--|---------|-------------|--|--|---------|-------------|--|--|---------|-------------|--|--|---------|-------------|--|--|---------|-------------|--|--|---------|-------------|--|--|---------|-------------|--|--|---------|-------------|--|--|---------|-------------|--|--|---------|-------------|--|--|---------|-------------|--|--|---------|-------------|--|--|---------|-------------|--|--|---------|-------------|--|--|---------|-------------|--|--|---------|-------------|--|--|---------|-------------|--|--|---------|-------------|--|--|---------|-------------|--|--|---------|-------------|--|--|---------|-------------|--|--|---------|-------------|--|--|---------|-------------|--|--|---------|-------------|--|--|---------|-------------|--|--|---------|-------------|--|--|---------|-------------|--|--|---------|-------------|--|--|---------|-------------|--|--|---------|-------------|--|--|---------|-------------|--|--|
|---------|---------|-------------|--|--|---------|-------------|--|--|---------|-------------|--|--|---------|-------------|--|--|---------|-------------|--|--|---------|-------------|--|--|---------|-------------|--|--|---------|-------------|--|--|---------|-------------|--|--|---------|-------------|--|--|---------|-------------|--|--|---------|-------------|--|--|---------|-------------|--|--|---------|-------------|--|--|---------|-------------|--|--|---------|-------------|--|--|---------|-------------|--|--|---------|-------------|--|--|---------|-------------|--|--|---------|-------------|--|--|---------|-------------|--|--|---------|-------------|--|--|---------|-------------|--|--|---------|-------------|--|--|---------|-------------|--|--|---------|-------------|--|--|---------|-------------|--|--|---------|-------------|--|--|---------|-------------|--|--|---------|-------------|--|--|---------|-------------|--|--|---------|-------------|--|--|---------|-------------|--|--|---------|-------------|--|--|---------|-------------|--|--|---------|-------------|--|--|---------|-------------|--|--|---------|-------------|--|--|---------|-------------|--|--|---------|-------------|--|--|---------|-------------|--|--|---------|-------------|--|--|---------|-------------|--|--|---------|-------------|--|--|---------|-------------|--|--|---------|-------------|--|--|---------|-------------|--|--|---------|-------------|--|--|---------|-------------|--|--|---------|-------------|--|--|---------|-------------|--|--|---------|-------------|--|--|---------|-------------|--|--|---------|-------------|--|--|---------|-------------|--|--|---------|-------------|--|--|---------|-------------|--|--|---------|-------------|--|--|---------|-------------|--|--|---------|-------------|--|--|---------|-------------|--|--|---------|-------------|--|--|---------|-------------|--|--|---------|-------------|--|--|---------|-------------|--|--|---------|-------------|--|--|---------|-------------|--|--|---------|-------------|--|--|---------|-------------|--|--|---------|-------------|--|--|---------|-------------|--|--|---------|-------------|--|--|---------|-------------|--|--|---------|-------------|--|--|---------|-------------|--|--|---------|-------------|--|--|---------|-------------|--|--|---------|-------------|--|--|---------|-------------|--|--|---------|-------------|--|--|---------|-------------|--|--|---------|-------------|--|--|---------|-------------|--|--|---------|-------------|--|--|---------|-------------|--|--|---------|-------------|--|--|---------|-------------|--|--|---------|-------------|--|--|---------|-------------|--|--|---------|-------------|--|--|---------|-------------|--|--|---------|-------------|--|--|---------|-------------|--|--|---------|-------------|--|--|---------|-------------|--|--|---------|-------------|--|--|---------|-------------|--|--|---------|-------------|--|--|---------|-------------|--|--|---------|-------------|--|--|---------|-------------|--|--|---------|-------------|--|--|---------|-------------|--|--|---------|-------------|--|--|---------|-------------|--|--|---------|-------------|--|--|---------|-------------|--|--|---------|-------------|--|--|---------|-------------|--|--|---------|-------------|--|--|---------|-------------|--|--|---------|-------------|--|--|---------|-------------|--|--|---------|-------------|--|--|---------|-------------|--|--|---------|-------------|--|--|---------|-------------|--|--|---------|-------------|--|--|---------|-------------|--|--|---------|-------------|--|--|---------|-------------|--|--|---------|-------------|--|--|---------|-------------|--|--|---------|-------------|--|--|---------|-------------|--|--|---------|-------------|--|--|---------|-------------|--|--|---------|-------------|--|--|---------|-------------|--|--|---------|-------------|--|--|---------|-------------|--|--|---------|-------------|--|--|---------|-------------|--|--|---------|-------------|--|--|---------|-------------|--|--|---------|-------------|--|--|---------|-------------|--|--|---------|-------------|--|--|---------|-------------|--|--|---------|-------------|--|--|---------|-------------|--|--|---------|-------------|--|--|---------|-------------|--|--|---------|-------------|--|--|---------|-------------|--|--|---------|-------------|--|--|---------|-------------|--|--|---------|-------------|--|--|---------|-------------|--|--|---------|-------------|--|--|---------|-------------|--|--|---------|-------------|--|--|---------|-------------|--|--|---------|-------------|--|--|---------|-------------|--|--|---------|-------------|--|--|---------|-------------|--|--|---------|-------------|--|--|---------|-------------|--|--|---------|-------------|--|--|---------|-------------|--|--|---------|-------------|--|--|---------|-------------|--|--|---------|-------------|--|--|---------|-------------|--|--|---------|-------------|--|--|---------|-------------|--|--|---------|-------------|--|--|---------|-------------|--|--|---------|-------------|--|--|---------|-------------|--|--|---------|-------------|--|--|---------|-------------|--|--|---------|-------------|--|--|---------|-------------|--|--|---------|-------------|--|--|---------|-------------|--|--|---------|-------------|--|--|---------|-------------|--|--|---------|-------------|--|--|---------|-------------|--|--|---------|-------------|--|--|---------|-------------|--|--|---------|-------------|--|--|---------|-------------|--|--|---------|-------------|--|--|---------|-------------|--|--|---------|-------------|--|--|---------|-------------|--|--|---------|-------------|--|--|---------|-------------|--|--|---------|-------------|--|--|---------|-------------|--|--|---------|-------------|--|--|---------|-------------|--|--|---------|-------------|--|--|---------|-------------|--|--|---------|-------------|--|--|---------|-------------|--|--|---------|-------------|--|--|---------|-------------|--|--|---------|-------------|--|--|---------|-------------|--|--|---------|-------------|--|--|---------|-------------|--|--|---------|-------------|--|--|---------|-------------|--|--|---------|-------------|--|--|---------|-------------|--|--|---------|-------------|--|--|---------|-------------|--|--|---------|-------------|--|--|---------|-------------|--|--|---------|-------------|--|--|---------|-------------|--|--|---------|-------------|--|--|



File: ESM\_10 (Online Resource 10)

Title: Comparison of Multivariate Molecular Analyses of Pediatric Diffuse Intrinsic Piloile Glomas Reveals Distinct Molecular Subtypes

Journal: Acta Neuropathologica

Authors: Amanda M. Stransik, Madhuri Kumbhakar, Kendall Snyder, Sidicki Yavuz, Joe Devenney,

Brennan Harmon, Jordan Hall, Eric H. Raabe, Ping An, Melanie Weingart, Brian Ross, Sarah Muege, Roger J. Packer, Javad Nazarian

Corresponding Author:

Javad Nazarian, Children's National Medical Center, Center for Genetic Medicine,

111 Michigan Ave., NW, Washington DC, 20010

Phone: 202-476-6022 Fax: 202-476-6014

Email: J.Nazarian@CNMC.org

| FolChang106 |        |             |               |        |             |               |        |             |               | FolChang111 |             |               |        |             |               |        |             |               |        | FolChang112 |               |        |              |               |        |             |               |        |             | FolChang121   |        |             |               |        |             |               |        |             |               | FolChang137 |             |               |        |             |               |        |             |               |        | FolChang1383 |               |        |             |               |        |             |               |        |             | FolChang166   |        |             |               |        |             |               |        |             |               |        |             |               |        |             |               |        |             |               |        |             |               |        |             |               |        |             |               |        |             |               |        |             |               |        |             |               |        |             |               |        |             |               |        |             |               |        |             |               |        |             |               |        |             |               |        |             |               |        |             |               |        |             |               |        |             |               |        |             |               |        |             |               |        |             |               |        |             |               |        |             |               |        |             |               |        |             |               |        |             |               |        |             |               |        |             |               |        |             |               |        |             |               |        |             |               |        |             |               |        |             |               |        |             |               |        |             |               |        |             |               |        |             |               |        |             |               |        |             |               |        |             |               |        |             |               |        |             |               |        |             |               |        |             |               |        |             |               |        |             |               |        |             |               |        |             |               |        |             |               |        |             |               |        |             |               |        |             |               |        |             |               |        |             |               |        |             |               |        |             |               |        |             |               |        |             |               |        |             |               |        |             |               |        |             |               |        |             |               |        |             |               |        |             |               |        |             |               |        |             |               |        |             |               |        |             |               |        |             |               |        |             |               |        |             |               |        |             |               |        |             |               |        |             |               |        |             |               |        |             |               |        |             |               |        |             |               |        |             |               |        |             |               |        |             |               |        |             |               |        |             |               |        |             |               |        |             |               |        |             |               |        |             |               |        |             |               |        |             |               |        |             |               |        |             |               |        |             |               |        |             |               |        |             |               |        |             |               |        |             |               |        |             |               |        |             |               |        |             |               |        |             |               |        |             |               |        |             |               |        |             |               |        |             |               |        |             |               |        |             |               |        |             |               |        |             |               |        |             |               |        |             |               |        |             |               |        |             |               |        |             |               |        |             |               |        |             |               |        |             |               |        |             |               |        |             |               |        |             |               |        |             |               |        |             |               |        |             |               |        |             |               |        |             |               |        |             |               |        |             |               |        |             |               |        |             |               |        |             |               |        |             |               |        |             |               |        |             |               |        |             |               |        |             |               |        |             |               |        |             |               |        |             |               |        |             |               |        |             |               |        |             |               |        |             |               |        |             |               |        |             |               |        |             |               |        |             |               |        |             |               |        |             |               |        |             |               |        |             |               |        |             |               |        |             |               |        |             |               |        |             |               |        |             |               |        |             |               |        |             |               |        |             |               |        |             |               |        |             |               |        |             |               |        |             |               |        |             |               |        |             |               |        |             |               |        |             |               |        |             |               |        |             |               |        |             |               |        |             |               |        |             |               |        |             |               |        |             |               |        |             |               |        |             |               |        |             |               |        |             |               |        |             |               |        |             |               |        |             |               |        |             |               |        |             |               |        |             |               |        |             |               |        |             |               |        |             |               |        |             |               |        |             |               |
|-------------|--------|-------------|---------------|--------|-------------|---------------|--------|-------------|---------------|-------------|-------------|---------------|--------|-------------|---------------|--------|-------------|---------------|--------|-------------|---------------|--------|--------------|---------------|--------|-------------|---------------|--------|-------------|---------------|--------|-------------|---------------|--------|-------------|---------------|--------|-------------|---------------|-------------|-------------|---------------|--------|-------------|---------------|--------|-------------|---------------|--------|--------------|---------------|--------|-------------|---------------|--------|-------------|---------------|--------|-------------|---------------|--------|-------------|---------------|--------|-------------|---------------|--------|-------------|---------------|--------|-------------|---------------|--------|-------------|---------------|--------|-------------|---------------|--------|-------------|---------------|--------|-------------|---------------|--------|-------------|---------------|--------|-------------|---------------|--------|-------------|---------------|--------|-------------|---------------|--------|-------------|---------------|--------|-------------|---------------|--------|-------------|---------------|--------|-------------|---------------|--------|-------------|---------------|--------|-------------|---------------|--------|-------------|---------------|--------|-------------|---------------|--------|-------------|---------------|--------|-------------|---------------|--------|-------------|---------------|--------|-------------|---------------|--------|-------------|---------------|--------|-------------|---------------|--------|-------------|---------------|--------|-------------|---------------|--------|-------------|---------------|--------|-------------|---------------|--------|-------------|---------------|--------|-------------|---------------|--------|-------------|---------------|--------|-------------|---------------|--------|-------------|---------------|--------|-------------|---------------|--------|-------------|---------------|--------|-------------|---------------|--------|-------------|---------------|--------|-------------|---------------|--------|-------------|---------------|--------|-------------|---------------|--------|-------------|---------------|--------|-------------|---------------|--------|-------------|---------------|--------|-------------|---------------|--------|-------------|---------------|--------|-------------|---------------|--------|-------------|---------------|--------|-------------|---------------|--------|-------------|---------------|--------|-------------|---------------|--------|-------------|---------------|--------|-------------|---------------|--------|-------------|---------------|--------|-------------|---------------|--------|-------------|---------------|--------|-------------|---------------|--------|-------------|---------------|--------|-------------|---------------|--------|-------------|---------------|--------|-------------|---------------|--------|-------------|---------------|--------|-------------|---------------|--------|-------------|---------------|--------|-------------|---------------|--------|-------------|---------------|--------|-------------|---------------|--------|-------------|---------------|--------|-------------|---------------|--------|-------------|---------------|--------|-------------|---------------|--------|-------------|---------------|--------|-------------|---------------|--------|-------------|---------------|--------|-------------|---------------|--------|-------------|---------------|--------|-------------|---------------|--------|-------------|---------------|--------|-------------|---------------|--------|-------------|---------------|--------|-------------|---------------|--------|-------------|---------------|--------|-------------|---------------|--------|-------------|---------------|--------|-------------|---------------|--------|-------------|---------------|--------|-------------|---------------|--------|-------------|---------------|--------|-------------|---------------|--------|-------------|---------------|--------|-------------|---------------|--------|-------------|---------------|--------|-------------|---------------|--------|-------------|---------------|--------|-------------|---------------|--------|-------------|---------------|--------|-------------|---------------|--------|-------------|---------------|--------|-------------|---------------|--------|-------------|---------------|--------|-------------|---------------|--------|-------------|---------------|--------|-------------|---------------|--------|-------------|---------------|--------|-------------|---------------|--------|-------------|---------------|--------|-------------|---------------|--------|-------------|---------------|--------|-------------|---------------|--------|-------------|---------------|--------|-------------|---------------|--------|-------------|---------------|--------|-------------|---------------|--------|-------------|---------------|--------|-------------|---------------|--------|-------------|---------------|--------|-------------|---------------|--------|-------------|---------------|--------|-------------|---------------|--------|-------------|---------------|--------|-------------|---------------|--------|-------------|---------------|--------|-------------|---------------|--------|-------------|---------------|--------|-------------|---------------|--------|-------------|---------------|--------|-------------|---------------|--------|-------------|---------------|--------|-------------|---------------|--------|-------------|---------------|--------|-------------|---------------|--------|-------------|---------------|--------|-------------|---------------|--------|-------------|---------------|--------|-------------|---------------|--------|-------------|---------------|--------|-------------|---------------|--------|-------------|---------------|--------|-------------|---------------|--------|-------------|---------------|--------|-------------|---------------|--------|-------------|---------------|--------|-------------|---------------|--------|-------------|---------------|--------|-------------|---------------|--------|-------------|---------------|--------|-------------|---------------|--------|-------------|---------------|--------|-------------|---------------|--------|-------------|---------------|--------|-------------|---------------|--------|-------------|---------------|--------|-------------|---------------|--------|-------------|---------------|--------|-------------|---------------|--------|-------------|---------------|--------|-------------|---------------|--------|-------------|---------------|--------|-------------|---------------|--------|-------------|---------------|--------|-------------|---------------|--------|-------------|---------------|--------|-------------|---------------|--------|-------------|---------------|--------|-------------|---------------|--------|-------------|---------------|--------|-------------|---------------|--------|-------------|---------------|--------|-------------|---------------|--------|-------------|---------------|--------|-------------|---------------|--------|-------------|---------------|--------|-------------|---------------|--------|-------------|---------------|--------|-------------|---------------|--------|-------------|---------------|--------|-------------|---------------|--------|-------------|---------------|--------|-------------|---------------|--------|-------------|---------------|--------|-------------|---------------|--------|-------------|---------------|--------|-------------|---------------|--------|-------------|---------------|--------|-------------|---------------|--------|-------------|---------------|--------|-------------|---------------|--------|-------------|---------------|--------|-------------|---------------|--------|-------------|---------------|
| Gene ID     | vs. n) | (106 vs. n) | (Description) | vs. n) | (111 vs. n) | (Description) | vs. n) | (112 vs. n) | (Description) | vs. n)      | (121 vs. n) | (Description) | vs. n) | (121 vs. n) | (Description) | vs. n) | (121 vs. n) | (Description) | vs. n) | (137 vs. n) | (Description) | vs. n) | (1383 vs. n) | (Description) | vs. n) | (137 vs. n) | (Description) | vs. n) | (166 vs. n) | (Description) | vs. n) | (166 vs. n) | (Description) | vs. n) | (166 vs. n) | (Description) | vs. n) | (166 vs. n) | (Description) | vs. n)      | (166 vs. n) | (Description) | vs. n) | (166 vs. n) | (Description) | vs. n) | (166 vs. n) | (Description) | vs. n) | (166 vs. n)  | (Description) | vs. n) | (166 vs. n) | (Description) | vs. n) | (166 vs. n) | (Description) | vs. n) | (166 vs. n) | (Description) | vs. n) | (166 vs. n) | (Description) | vs. n) | (166 vs. n) | (Description) | vs. n) | (166 vs. n) | (Description) | vs. n) | (166 vs. n) | (Description) | vs. n) | (166 vs. n) | (Description) | vs. n) | (166 vs. n) | (Description) | vs. n) | (166 vs. n) | (Description) | vs. n) | (166 vs. n) | (Description) | vs. n) | (166 vs. n) | (Description) | vs. n) | (166 vs. n) | (Description) | vs. n) | (166 vs. n) | (Description) | vs. n) | (166 vs. n) | (Description) | vs. n) | (166 vs. n) | (Description) | vs. n) | (166 vs. n) | (Description) | vs. n) | (166 vs. n) | (Description) | vs. n) | (166 vs. n) | (Description) | vs. n) | (166 vs. n) | (Description) | vs. n) | (166 vs. n) | (Description) | vs. n) | (166 vs. n) | (Description) | vs. n) | (166 vs. n) | (Description) | vs. n) | (166 vs. n) | (Description) | vs. n) | (166 vs. n) | (Description) | vs. n) | (166 vs. n) | (Description) | vs. n) | (166 vs. n) | (Description) | vs. n) | (166 vs. n) | (Description) | vs. n) | (166 vs. n) | (Description) | vs. n) | (166 vs. n) | (Description) | vs. n) | (166 vs. n) | (Description) | vs. n) | (166 vs. n) | (Description) | vs. n) | (166 vs. n) | (Description) | vs. n) | (166 vs. n) | (Description) | vs. n) | (166 vs. n) | (Description) | vs. n) | (166 vs. n) | (Description) | vs. n) | (166 vs. n) | (Description) | vs. n) | (166 vs. n) | (Description) | vs. n) | (166 vs. n) | (Description) | vs. n) | (166 vs. n) | (Description) | vs. n) | (166 vs. n) | (Description) | vs. n) | (166 vs. n) | (Description) | vs. n) | (166 vs. n) | (Description) | vs. n) | (166 vs. n) | (Description) | vs. n) | (166 vs. n) | (Description) | vs. n) | (166 vs. n) | (Description) | vs. n) | (166 vs. n) | (Description) | vs. n) | (166 vs. n) | (Description) | vs. n) | (166 vs. n) | (Description) | vs. n) | (166 vs. n) | (Description) | vs. n) | (166 vs. n) | (Description) | vs. n) | (166 vs. n) | (Description) | vs. n) | (166 vs. n) | (Description) | vs. n) | (166 vs. n) | (Description) | vs. n) | (166 vs. n) | (Description) | vs. n) | (166 vs. n) | (Description) | vs. n) | (166 vs. n) | (Description) | vs. n) | (166 vs. n) | (Description) | vs. n) | (166 vs. n) | (Description) | vs. n) | (166 vs. n) | (Description) | vs. n) | (166 vs. n) | (Description) | vs. n) | (166 vs. n) | (Description) | vs. n) | (166 vs. n) | (Description) | vs. n) | (166 vs. n) | (Description) | vs. n) | (166 vs. n) | (Description) | vs. n) | (166 vs. n) | (Description) | vs. n) | (166 vs. n) | (Description) | vs. n) | (166 vs. n) | (Description) | vs. n) | (166 vs. n) | (Description) | vs. n) | (166 vs. n) | (Description) | vs. n) | (166 vs. n) | (Description) | vs. n) | (166 vs. n) | (Description) | vs. n) | (166 vs. n) | (Description) | vs. n) | (166 vs. n) | (Description) | vs. n) | (166 vs. n) | (Description) | vs. n) | (166 vs. n) | (Description) | vs. n) | (166 vs. n) | (Description) | vs. n) | (166 vs. n) | (Description) | vs. n) | (166 vs. n) | (Description) | vs. n) | (166 vs. n) | (Description) | vs. n) | (166 vs. n) | (Description) | vs. n) | (166 vs. n) | (Description) | vs. n) | (166 vs. n) | (Description) | vs. n) | (166 vs. n) | (Description) | vs. n) | (166 vs. n) | (Description) | vs. n) | (166 vs. n) | (Description) | vs. n) | (166 vs. n) | (Description) | vs. n) | (166 vs. n) | (Description) | vs. n) | (166 vs. n) | (Description) | vs. n) | (166 vs. n) | (Description) | vs. n) | (166 vs. n) | (Description) | vs. n) | (166 vs. n) | (Description) | vs. n) | (166 vs. n) | (Description) | vs. n) | (166 vs. n) | (Description) | vs. n) | (166 vs. n) | (Description) | vs. n) | (166 vs. n) | (Description) | vs. n) | (166 vs. n) | (Description) | vs. n) | (166 vs. n) | (Description) | vs. n) | (166 vs. n) | (Description) | vs. n) | (166 vs. n) | (Description) | vs. n) | (166 vs. n) | (Description) | vs. n) | (166 vs. n) | (Description) | vs. n) | (166 vs. n) | (Description) | vs. n) | (166 vs. n) | (Description) | vs. n) | (166 vs. n) | (Description) | vs. n) | (166 vs. n) | (Description) | vs. n) | (166 vs. n) | (Description) | vs. n) | (166 vs. n) | (Description) | vs. n) | (166 vs. n) | (Description) | vs. n) | (166 vs. n) | (Description) | vs. n) | (166 vs. n) | (Description) | vs. n) | (166 vs. n) | (Description) | vs. n) | (166 vs. n) | (Description) | vs. n) | (166 vs. n) | (Description) | vs. n) | (166 vs. n) | (Description) | vs. n) | (166 vs. n) | (Description) | vs. n) | (166 vs. n) | (Description) | vs. n) | (166 vs. n) | (Description) | vs. n) | (166 vs. n) | (Description) | vs. n) | (166 vs. n) | (Description) | vs. n) | (166 vs. n) | (Description) | vs. n) | (166 vs. n) | (Description) | vs. n) | (166 vs. n) | (Description) | vs. n) | (166 vs. n) | (Description) | vs. n) | (166 vs. n) | (Description) | vs. n) | (166 vs. n) | (Description) | vs. n) | (166 vs. n) | (Description) | vs. n) | (166 vs. n) | (Description) | vs. n) | (166 vs. n) | (Description) | vs. n) | (166 vs. n) | (Description) | vs. n) | (166 vs. n) | (Description) | vs. n) | (166 vs. n) | (Description) | vs. n) | (166 vs. n) | (Description) | vs. n) | (166 vs. n) | (Description) | vs. n) | (166 vs. n) | (Description) | vs. n) | (166 vs. n) | (Description) | vs. n) | (166 vs. n) | (Description) | vs. n) | (166 vs. n) | (Description) | vs. n) | (166 vs. n) | (Description) | vs. n) | (166 vs. n) | (Description) | vs. n) | (166 vs. n) | (Description) | vs. n) | (166 vs. n) | (Description) | vs. n) | (166 vs. n) | (Description) | vs. n) | (166 vs. n) | (Description) | vs. n) | (166 vs. n) | (Description) | vs. n) | (166 vs. n) | (Description) | vs. n) | (166 vs. n) | (Description) | vs. n) | (166 vs. n) | (Description) | vs. n) | (166 vs. n) | (Description) | vs. n) | (166 vs. n) | (Description) | vs. n) | (166 vs. n) | (Description) | vs. n) | (166 vs. n) | (Description) | vs. n) | (166 vs. n) | (Description) | vs. n) | (166 vs. n) | (Description) | vs. n) | (166 vs. n) | (Description) | vs. n) | (166 vs. n) | (Description) | vs. n) | (166 vs. n) | (Description) | vs. n) | (166 vs. n) | (Description) | vs. n) | (166 vs. n) | (Description) | vs. n) | (166 vs. n) | (Description) | vs. n) | (166 vs. n) | (Description) | vs. n) | (166 vs. n) | (Description) | vs. n) | (166 vs. n) | (Description) | vs. n) | (166 vs. n) | (Description) | vs. n) | (166 vs. n) | (Description) | vs. n) | (166 vs. n) | (Description) | vs. n) | (166 vs. n) | (Description) | vs. n) | (166 vs. n) | (Description) | vs. n) | (166 vs. n) | (Description) | vs. n) | (166 vs. n) | (Description) | vs. n) | (166 vs. n) | (Description) | vs. n) | (166 vs. n) | (Description) | vs. n) | (166 vs. n) | (Description) | vs. n) | (166 vs. n) | (Description) | vs. n) | (166 vs. n) | (Description) | vs. n) | (166 vs. n) | (Description) | vs. n) | (166 vs. n) | (Description) | vs. n) | (166 vs. n) | (Description) | vs. n) | (166 vs. n) | (Description) | vs. n) | (166 vs. n) | (Description) | vs. n) | (166 vs. n) | (Description) | vs. n) | (166 vs. n) | (Description) | vs. n) | (166 vs. n) | (Description) | vs. n) | (166 vs. n) | (Description) | vs. n) | (166 vs. n) | (Description) | vs. n) | (166 vs. n) | (Description) | vs. n) | (166 vs. n) | (Description) | vs. n) | (166 vs. n) | (Description) | vs. n) | (166 vs. n) | (Description) | vs. n) | (166 vs. n) | (Description) | vs. n) | (166 vs. n) | (Description) | vs. n) | (166 vs. n) | (Description) | vs. n) | (166 vs. n) | (Description) | vs. n) | (166 vs. n) | (Description) |

File: ISM\_10 (Online Resource 10)

Title: Comparative Multidimensional Molecular Analyses of Pediatric Diffuse Intrinsic Glioma Reveals Distinct Molecular Subtypes

Journal: Acta Neuropathologica

Authors: Amanda M. Stransik, Madhuri Kumbhakar, Kendall Snyder, Sidicki Yavuz, Joe Devenney,

Brennan Harmon, Jordan Hall, Eric H. Raabe, Ping An, Melanie Weingart, Brian Ross, Sarah Magee, Roger J. Packer, Javad Nazarian

Corresponding Author:

Javad Nazarian, Children's National Medical Center, Center for Genetic Medicine,

111 Michigan Ave., NW, Washington DC, 20010

Phone: 202-476-0021; Fax: 202-476-0014

Email: J.Nazarian@CNMC.org

| Gene ID | p-<br>value[106] | MeanRatio | FoldChange[106] | p-<br>value[107] | MeanRatio | FoldChange[107] | p-<br>value[108] | MeanRatio | FoldChange[108] | p-<br>value[109] | MeanRatio | FoldChange[109] | p-<br>value[110] | MeanRatio | FoldChange[110] | p-<br>value[111] | MeanRatio | FoldChange[111] | p-<br>value[112] | MeanRatio | FoldChange[112] | p-<br>value[113] | MeanRatio | FoldChange[113] | p-<br>value[114] | MeanRatio | FoldChange[114] | p-<br>value[115] | MeanRatio | FoldChange[115] | p-<br>value[116] | MeanRatio | FoldChange[116] | p-<br>value[117] | MeanRatio | FoldChange[117] | p-<br>value[118] | MeanRatio | FoldChange[118] | p-<br>value[119] | MeanRatio | FoldChange[119] | p-<br>value[120] | MeanRatio | FoldChange[120] | p-<br>value[121] | MeanRatio | FoldChange[121] | p-<br>value[122] | MeanRatio | FoldChange[122] | p-<br>value[123] | MeanRatio | FoldChange[123] | p-<br>value[124] | MeanRatio | FoldChange[124] | p-<br>value[125] | MeanRatio | FoldChange[125] | p-<br>value[126] | MeanRatio | FoldChange[126] | p-<br>value[127] | MeanRatio | FoldChange[127] | p-<br>value[128] | MeanRatio | FoldChange[128] | p-<br>value[129] | MeanRatio | FoldChange[129] | p-<br>value[130] | MeanRatio | FoldChange[130] | p-<br>value[131] | MeanRatio | FoldChange[131] | p-<br>value[132] | MeanRatio | FoldChange[132] | p-<br>value[133] | MeanRatio | FoldChange[133] | p-<br>value[134] | MeanRatio | FoldChange[134] | p-<br>value[135] | MeanRatio | FoldChange[135] | p-<br>value[136] | MeanRatio | FoldChange[136] | p-<br>value[137] | MeanRatio | FoldChange[137] | p-<br>value[138] | MeanRatio | FoldChange[138] | p-<br>value[139] | MeanRatio | FoldChange[139] | p-<br>value[140] | MeanRatio | FoldChange[140] | p-<br>value[141] | MeanRatio | FoldChange[141] | p-<br>value[142] | MeanRatio | FoldChange[142] | p-<br>value[143] | MeanRatio | FoldChange[143] | p-<br>value[144] | MeanRatio | FoldChange[144] | p-<br>value[145] | MeanRatio | FoldChange[145] | p-<br>value[146] | MeanRatio | FoldChange[146] | p-<br>value[147] | MeanRatio | FoldChange[147] | p-<br>value[148] | MeanRatio | FoldChange[148] | p-<br>value[149] | MeanRatio | FoldChange[149] | p-<br>value[150] | MeanRatio | FoldChange[150] | p-<br>value[151] | MeanRatio | FoldChange[151] | p-<br>value[152] | MeanRatio | FoldChange[152] | p-<br>value[153] | MeanRatio | FoldChange[153] | p-<br>value[154] | MeanRatio | FoldChange[154] | p-<br>value[155] | MeanRatio | FoldChange[155] | p-<br>value[156] | MeanRatio | FoldChange[156] | p-<br>value[157] | MeanRatio | FoldChange[157] | p-<br>value[158] | MeanRatio | FoldChange[158] | p-<br>value[159] | MeanRatio | FoldChange[159] | p-<br>value[160] | MeanRatio | FoldChange[160] | p-<br>value[161] | MeanRatio | FoldChange[161] | p-<br>value[162] | MeanRatio | FoldChange[162] | p-<br>value[163] | MeanRatio | FoldChange[163] | p-<br>value[164] | MeanRatio | FoldChange[164] | p-<br>value[165] | MeanRatio | FoldChange[165] | p-<br>value[166] | MeanRatio | FoldChange[166] | p-<br>value[167] | MeanRatio | FoldChange[167] | p-<br>value[168] | MeanRatio | FoldChange[168] | p-<br>value[169] | MeanRatio | FoldChange[169] | p-<br>value[170] | MeanRatio | FoldChange[170] | p-<br>value[171] | MeanRatio | FoldChange[171] | p-<br>value[172] | MeanRatio | FoldChange[172] | p-<br>value[173] | MeanRatio | FoldChange[173] | p-<br>value[174] | MeanRatio | FoldChange[174] | p-<br>value[175] | MeanRatio | FoldChange[175] | p-<br>value[176] | MeanRatio | FoldChange[176] | p-<br>value[177] | MeanRatio | FoldChange[177] | p-<br>value[178] | MeanRatio | FoldChange[178] | p-<br>value[179] | MeanRatio | FoldChange[179] | p-<br>value[180] | MeanRatio | FoldChange[180] | p-<br>value[181] | MeanRatio | FoldChange[181] | p-<br>value[182] | MeanRatio | FoldChange[182] | p-<br>value[183] | MeanRatio | FoldChange[183] | p-<br>value[184] | MeanRatio | FoldChange[184] | p-<br>value[185] | MeanRatio | FoldChange[185] | p-<br>value[186] | MeanRatio | FoldChange[186] | p-<br>value[187] | MeanRatio | FoldChange[187] | p-<br>value[188] | MeanRatio | FoldChange[188] | p-<br>value[189] | MeanRatio | FoldChange[189] | p-<br>value[190] | MeanRatio | FoldChange[190] | p-<br>value[191] | MeanRatio | FoldChange[191] | p-<br>value[192] | MeanRatio | FoldChange[192] | p-<br>value[193] | MeanRatio | FoldChange[193] | p-<br>value[194] | MeanRatio | FoldChange[194] | p-<br>value[195] | MeanRatio | FoldChange[195] | p-<br>value[196] | MeanRatio | FoldChange[196] | p-<br>value[197] | MeanRatio | FoldChange[197] | p-<br>value[198] | MeanRatio | FoldChange[198] | p-<br>value[199] | MeanRatio | FoldChange[199] | p-<br>value[200] | MeanRatio | FoldChange[200] | p-<br>value[201] | MeanRatio | FoldChange[201] | p-<br>value[202] | MeanRatio | FoldChange[202] | p-<br>value[203] | MeanRatio | FoldChange[203] | p-<br>value[204] | MeanRatio | FoldChange[204] | p-<br>value[205] | MeanRatio | FoldChange[205] | p-<br>value[206] | MeanRatio | FoldChange[206] | p-<br>value[207] | MeanRatio | FoldChange[207] | p-<br>value[208] | MeanRatio | FoldChange[208] | p-<br>value[209] | MeanRatio | FoldChange[209] | p-<br>value[210] | MeanRatio | FoldChange[210] | p-<br>value[211] | MeanRatio | FoldChange[211] | p-<br>value[212] | MeanRatio | FoldChange[212] | p-<br>value[213] | MeanRatio | FoldChange[213] | p-<br>value[214] | MeanRatio | FoldChange[214] | p-<br>value[215] | MeanRatio | FoldChange[215] | p-<br>value[216] | MeanRatio | FoldChange[216] | p-<br>value[217] | MeanRatio | FoldChange[217] | p-<br>value[218] | MeanRatio | FoldChange[218] | p-<br>value[219] | MeanRatio | FoldChange[219] | p-<br>value[220] | MeanRatio | FoldChange[220] | p-<br>value[221] | MeanRatio | FoldChange[221] | p-<br>value[222] | MeanRatio | FoldChange[222] | p-<br>value[223] | MeanRatio | FoldChange[223] | p-<br>value[224] | MeanRatio | FoldChange[224] | p-<br>value[225] | MeanRatio | FoldChange[225] | p-<br>value[226] | MeanRatio | FoldChange[226] | p-<br>value[227] | MeanRatio | FoldChange[227] | p-<br>value[228] | MeanRatio | FoldChange[228] | p-<br>value[229] | MeanRatio | FoldChange[229] | p-<br>value[230] | MeanRatio | FoldChange[230] | p-<br>value[231] | MeanRatio | FoldChange[231] | p-<br>value[232] | MeanRatio | FoldChange[232] | p-<br>value[233] | MeanRatio | FoldChange[233] | p-<br>value[234] | MeanRatio | FoldChange[234] | p-<br>value[235] | MeanRatio | FoldChange[235] | p-<br>value[236] | MeanRatio | FoldChange[236] | p-<br>value[237] | MeanRatio | FoldChange[237] | p-<br>value[238] | MeanRatio | FoldChange[238] | p-<br>value[239] | MeanRatio | FoldChange[239] | p-<br>value[240] | MeanRatio | FoldChange[240] | p-<br>value[241] | MeanRatio | FoldChange[241] | p-<br>value[242] | MeanRatio | FoldChange[242] | p-<br>value[243] | MeanRatio | FoldChange[243] | p-<br>value[244] | MeanRatio | FoldChange[244] | p-<br>value[245] | MeanRatio | FoldChange[245] | p-<br>value[246] | MeanRatio | FoldChange[246] | p-<br>value[247] | MeanRatio | FoldChange[247] | p-<br>value[248] | MeanRatio | FoldChange[248] | p-<br>value[249] | MeanRatio | FoldChange[249] | p-<br>value[250] | MeanRatio | FoldChange[250] | p-<br>value[251] | MeanRatio | FoldChange[251] | p-<br>value[252] | MeanRatio | FoldChange[252] | p-<br>value[253] | MeanRatio | FoldChange[253] | p-<br>value[254] | MeanRatio | FoldChange[254] | p-<br>value[255] | MeanRatio | FoldChange[255] | p-<br>value[256] | MeanRatio | FoldChange[256] | p-<br>value[257] | MeanRatio | FoldChange[257] | p-<br>value[258] | MeanRatio | FoldChange[258] | p-<br>value[259] | MeanRatio | FoldChange[259] | p-<br>value[260] | MeanRatio | FoldChange[260] | p-<br>value[261] | MeanRatio | FoldChange[261] | p-<br>value[262] | MeanRatio | FoldChange[262] | p-<br>value[263] | MeanRatio | FoldChange[263] | p-<br>value[264] | MeanRatio | FoldChange[264] | p-<br>value[265] | MeanRatio | FoldChange[265] | p-<br>value[266] | MeanRatio | FoldChange[266] | p-<br>value[267] | MeanRatio | FoldChange[267] | p-<br>value[268] | MeanRatio | FoldChange[268] | p-<br>value[269] | MeanRatio | FoldChange[269] | p-<br>value[270] | MeanRatio | FoldChange[270] | p-<br>value[271] | MeanRatio | FoldChange[271] | p-<br>value[272] | MeanRatio | FoldChange[272] | p-<br>value[273] | MeanRatio | FoldChange[273] | p-<br>value[274] | MeanRatio | FoldChange[274] | p-<br>value[275] | MeanRatio | FoldChange[275] | p-<br>value[276] | MeanRatio | FoldChange[276] | p-<br>value[277] | MeanRatio | FoldChange[277] | p-<br>value[278] | MeanRatio | FoldChange[278] | p-<br>value[279] | MeanRatio | FoldChange[279] | p-<br>value[280] | MeanRatio | FoldChange[280] | p-<br>value[281] | MeanRatio | FoldChange[281] | p-<br>value[282] | MeanRatio | FoldChange[282] | p-<br>value[283] | MeanRatio | FoldChange[283] | p-<br>value[284] | MeanRatio | FoldChange[284] | p-<br>value[285] | MeanRatio | FoldChange[285] | p-<br>value[286] | MeanRatio | FoldChange[286] | p-<br>value[287] | MeanRatio | FoldChange[287] | p-<br>value[288] | MeanRatio | FoldChange[288] | p-<br>value[289] | MeanRatio | FoldChange[289] | p-<br>value[290] | MeanRatio | FoldChange[290] | p-<br>value[291] | MeanRatio | FoldChange[291] | p-<br>value[292] | MeanRatio | FoldChange[292] | p-<br>value[293] | MeanRatio |
|---------|------------------|-----------|-----------------|------------------|-----------|-----------------|------------------|-----------|-----------------|------------------|-----------|-----------------|------------------|-----------|-----------------|------------------|-----------|-----------------|------------------|-----------|-----------------|------------------|-----------|-----------------|------------------|-----------|-----------------|------------------|-----------|-----------------|------------------|-----------|-----------------|------------------|-----------|-----------------|------------------|-----------|-----------------|------------------|-----------|-----------------|------------------|-----------|-----------------|------------------|-----------|-----------------|------------------|-----------|-----------------|------------------|-----------|-----------------|------------------|-----------|-----------------|------------------|-----------|-----------------|------------------|-----------|-----------------|------------------|-----------|-----------------|------------------|-----------|-----------------|------------------|-----------|-----------------|------------------|-----------|-----------------|------------------|-----------|-----------------|------------------|-----------|-----------------|------------------|-----------|-----------------|------------------|-----------|-----------------|------------------|-----------|-----------------|------------------|-----------|-----------------|------------------|-----------|-----------------|------------------|-----------|-----------------|------------------|-----------|-----------------|------------------|-----------|-----------------|------------------|-----------|-----------------|------------------|-----------|-----------------|------------------|-----------|-----------------|------------------|-----------|-----------------|------------------|-----------|-----------------|------------------|-----------|-----------------|------------------|-----------|-----------------|------------------|-----------|-----------------|------------------|-----------|-----------------|------------------|-----------|-----------------|------------------|-----------|-----------------|------------------|-----------|-----------------|------------------|-----------|-----------------|------------------|-----------|-----------------|------------------|-----------|-----------------|------------------|-----------|-----------------|------------------|-----------|-----------------|------------------|-----------|-----------------|------------------|-----------|-----------------|------------------|-----------|-----------------|------------------|-----------|-----------------|------------------|-----------|-----------------|------------------|-----------|-----------------|------------------|-----------|-----------------|------------------|-----------|-----------------|------------------|-----------|-----------------|------------------|-----------|-----------------|------------------|-----------|-----------------|------------------|-----------|-----------------|------------------|-----------|-----------------|------------------|-----------|-----------------|------------------|-----------|-----------------|------------------|-----------|-----------------|------------------|-----------|-----------------|------------------|-----------|-----------------|------------------|-----------|-----------------|------------------|-----------|-----------------|------------------|-----------|-----------------|------------------|-----------|-----------------|------------------|-----------|-----------------|------------------|-----------|-----------------|------------------|-----------|-----------------|------------------|-----------|-----------------|------------------|-----------|-----------------|------------------|-----------|-----------------|------------------|-----------|-----------------|------------------|-----------|-----------------|------------------|-----------|-----------------|------------------|-----------|-----------------|------------------|-----------|-----------------|------------------|-----------|-----------------|------------------|-----------|-----------------|------------------|-----------|-----------------|------------------|-----------|-----------------|------------------|-----------|-----------------|------------------|-----------|-----------------|------------------|-----------|-----------------|------------------|-----------|-----------------|------------------|-----------|-----------------|------------------|-----------|-----------------|------------------|-----------|-----------------|------------------|-----------|-----------------|------------------|-----------|-----------------|------------------|-----------|-----------------|------------------|-----------|-----------------|------------------|-----------|-----------------|------------------|-----------|-----------------|------------------|-----------|-----------------|------------------|-----------|-----------------|------------------|-----------|-----------------|------------------|-----------|-----------------|------------------|-----------|-----------------|------------------|-----------|-----------------|------------------|-----------|-----------------|------------------|-----------|-----------------|------------------|-----------|-----------------|------------------|-----------|-----------------|------------------|-----------|-----------------|------------------|-----------|-----------------|------------------|-----------|-----------------|------------------|-----------|-----------------|------------------|-----------|-----------------|------------------|-----------|-----------------|------------------|-----------|-----------------|------------------|-----------|-----------------|------------------|-----------|-----------------|------------------|-----------|-----------------|------------------|-----------|-----------------|------------------|-----------|-----------------|------------------|-----------|-----------------|------------------|-----------|-----------------|------------------|-----------|-----------------|------------------|-----------|-----------------|------------------|-----------|-----------------|------------------|-----------|-----------------|------------------|-----------|-----------------|------------------|-----------|-----------------|------------------|-----------|-----------------|------------------|-----------|-----------------|------------------|-----------|-----------------|------------------|-----------|-----------------|------------------|-----------|-----------------|------------------|-----------|-----------------|------------------|-----------|-----------------|------------------|-----------|-----------------|------------------|-----------|-----------------|------------------|-----------|-----------------|------------------|-----------|-----------------|------------------|-----------|-----------------|------------------|-----------|-----------------|------------------|-----------|-----------------|------------------|-----------|-----------------|------------------|-----------|-----------------|------------------|-----------|-----------------|------------------|-----------|-----------------|------------------|-----------|-----------------|------------------|-----------|-----------------|------------------|-----------|-----------------|------------------|-----------|-----------------|------------------|-----------|-----------------|------------------|-----------|-----------------|------------------|-----------|-----------------|------------------|-----------|-----------------|------------------|-----------|-----------------|------------------|-----------|-----------------|------------------|-----------|-----------------|------------------|-----------|-----------------|------------------|-----------|-----------------|------------------|-----------|-----------------|------------------|-----------|-----------------|------------------|-----------|-----------------|------------------|-----------|-----------------|------------------|-----------|-----------------|------------------|-----------|-----------------|------------------|-----------|-----------------|------------------|-----------|-----------------|------------------|-----------|-----------------|------------------|-----------|-----------------|------------------|-----------|-----------------|------------------|-----------|-----------------|------------------|-----------|-----------------|------------------|-----------|-----------------|------------------|-----------|-----------------|------------------|-----------|-----------------|------------------|-----------|-----------------|------------------|-----------|-----------------|------------------|-----------|-----------------|------------------|-----------|-----------------|------------------|-----------|-----------------|------------------|-----------|-----------------|------------------|-----------|-----------------|------------------|-----------|-----------------|------------------|-----------|
|---------|------------------|-----------|-----------------|------------------|-----------|-----------------|------------------|-----------|-----------------|------------------|-----------|-----------------|------------------|-----------|-----------------|------------------|-----------|-----------------|------------------|-----------|-----------------|------------------|-----------|-----------------|------------------|-----------|-----------------|------------------|-----------|-----------------|------------------|-----------|-----------------|------------------|-----------|-----------------|------------------|-----------|-----------------|------------------|-----------|-----------------|------------------|-----------|-----------------|------------------|-----------|-----------------|------------------|-----------|-----------------|------------------|-----------|-----------------|------------------|-----------|-----------------|------------------|-----------|-----------------|------------------|-----------|-----------------|------------------|-----------|-----------------|------------------|-----------|-----------------|------------------|-----------|-----------------|------------------|-----------|-----------------|------------------|-----------|-----------------|------------------|-----------|-----------------|------------------|-----------|-----------------|------------------|-----------|-----------------|------------------|-----------|-----------------|------------------|-----------|-----------------|------------------|-----------|-----------------|------------------|-----------|-----------------|------------------|-----------|-----------------|------------------|-----------|-----------------|------------------|-----------|-----------------|------------------|-----------|-----------------|------------------|-----------|-----------------|------------------|-----------|-----------------|------------------|-----------|-----------------|------------------|-----------|-----------------|------------------|-----------|-----------------|------------------|-----------|-----------------|------------------|-----------|-----------------|------------------|-----------|-----------------|------------------|-----------|-----------------|------------------|-----------|-----------------|------------------|-----------|-----------------|------------------|-----------|-----------------|------------------|-----------|-----------------|------------------|-----------|-----------------|------------------|-----------|-----------------|------------------|-----------|-----------------|------------------|-----------|-----------------|------------------|-----------|-----------------|------------------|-----------|-----------------|------------------|-----------|-----------------|------------------|-----------|-----------------|------------------|-----------|-----------------|------------------|-----------|-----------------|------------------|-----------|-----------------|------------------|-----------|-----------------|------------------|-----------|-----------------|------------------|-----------|-----------------|------------------|-----------|-----------------|------------------|-----------|-----------------|------------------|-----------|-----------------|------------------|-----------|-----------------|------------------|-----------|-----------------|------------------|-----------|-----------------|------------------|-----------|-----------------|------------------|-----------|-----------------|------------------|-----------|-----------------|------------------|-----------|-----------------|------------------|-----------|-----------------|------------------|-----------|-----------------|------------------|-----------|-----------------|------------------|-----------|-----------------|------------------|-----------|-----------------|------------------|-----------|-----------------|------------------|-----------|-----------------|------------------|-----------|-----------------|------------------|-----------|-----------------|------------------|-----------|-----------------|------------------|-----------|-----------------|------------------|-----------|-----------------|------------------|-----------|-----------------|------------------|-----------|-----------------|------------------|-----------|-----------------|------------------|-----------|-----------------|------------------|-----------|-----------------|------------------|-----------|-----------------|------------------|-----------|-----------------|------------------|-----------|-----------------|------------------|-----------|-----------------|------------------|-----------|-----------------|------------------|-----------|-----------------|------------------|-----------|-----------------|------------------|-----------|-----------------|------------------|-----------|-----------------|------------------|-----------|-----------------|------------------|-----------|-----------------|------------------|-----------|-----------------|------------------|-----------|-----------------|------------------|-----------|-----------------|------------------|-----------|-----------------|------------------|-----------|-----------------|------------------|-----------|-----------------|------------------|-----------|-----------------|------------------|-----------|-----------------|------------------|-----------|-----------------|------------------|-----------|-----------------|------------------|-----------|-----------------|------------------|-----------|-----------------|------------------|-----------|-----------------|------------------|-----------|-----------------|------------------|-----------|-----------------|------------------|-----------|-----------------|------------------|-----------|-----------------|------------------|-----------|-----------------|------------------|-----------|-----------------|------------------|-----------|-----------------|------------------|-----------|-----------------|------------------|-----------|-----------------|------------------|-----------|-----------------|------------------|-----------|-----------------|------------------|-----------|-----------------|------------------|-----------|-----------------|------------------|-----------|-----------------|------------------|-----------|-----------------|------------------|-----------|-----------------|------------------|-----------|-----------------|------------------|-----------|-----------------|------------------|-----------|-----------------|------------------|-----------|-----------------|------------------|-----------|-----------------|------------------|-----------|-----------------|------------------|-----------|-----------------|------------------|-----------|-----------------|------------------|-----------|-----------------|------------------|-----------|-----------------|------------------|-----------|-----------------|------------------|-----------|-----------------|------------------|-----------|-----------------|------------------|-----------|-----------------|------------------|-----------|-----------------|------------------|-----------|-----------------|------------------|-----------|-----------------|------------------|-----------|-----------------|------------------|-----------|-----------------|------------------|-----------|-----------------|------------------|-----------|-----------------|------------------|-----------|-----------------|------------------|-----------|-----------------|------------------|-----------|-----------------|------------------|-----------|-----------------|------------------|-----------|-----------------|------------------|-----------|-----------------|------------------|-----------|-----------------|------------------|-----------|-----------------|------------------|-----------|-----------------|------------------|-----------|-----------------|------------------|-----------|-----------------|------------------|-----------|-----------------|------------------|-----------|-----------------|------------------|-----------|-----------------|------------------|-----------|-----------------|------------------|-----------|-----------------|------------------|-----------|-----------------|------------------|-----------|-----------------|------------------|-----------|-----------------|------------------|-----------|-----------------|------------------|-----------|-----------------|------------------|-----------|-----------------|------------------|-----------|-----------------|------------------|-----------|-----------------|------------------|-----------|-----------------|------------------|-----------|-----------------|------------------|-----------|-----------------|------------------|-----------|-----------------|------------------|-----------|-----------------|------------------|-----------|-----------------|------------------|-----------|-----------------|------------------|-----------|-----------------|------------------|-----------|-----------------|------------------|-----------|-----------------|------------------|-----------|-----------------|------------------|-----------|

File: ISM\_10 (Online Resource 10)

Figure: Comparative Multidimensional Molecular Analyses of Pediatric Diffuse Intrinsic Pontine Glioma Reveals Distinct Molecular Subtypes  
Journal: Acta Neuropathologica

Authors: Amanda M. Senn, Madhuri Kumbhakar, Kendall Snyder, Sidick Yavuz, Joe Deveney, Brennan Harmon, Jordan Hall, Eric H. Raabe, Ping An, Melanie Weingart, Brian Ross, Sarah Magee, Roger J. Packer, Javad Nazarian

Corresponding Author:

Javad Nazarian, Children's National Medical Center, Center for Genetic Medicine  
111 Michigan Ave., NW, Washington DC, 20010  
Phone: 202-476-6022 Fax: 202-476-6014  
Email: J.Nazarian@CNMC.org

| Gene ID  | p-value   | FolChang106 |                |                |           | FolChang110    |                |           |                | FolChang111    |            |                |                | FolChang112 |                |                |           | FolChang121    |                |           |              | FolChang137    |            |              |              | FolChang153 |              |              |          | FolChang156  |              |          |                |              |          |                |              |          |         |   |
|----------|-----------|-------------|----------------|----------------|-----------|----------------|----------------|-----------|----------------|----------------|------------|----------------|----------------|-------------|----------------|----------------|-----------|----------------|----------------|-----------|--------------|----------------|------------|--------------|--------------|-------------|--------------|--------------|----------|--------------|--------------|----------|----------------|--------------|----------|----------------|--------------|----------|---------|---|
|          |           | MeanRatio   | FoldChange     | Fvs.n          | p-value   | MeanRatio      | FoldChange     | Fvs.n     | p-value        | MeanRatio      | FoldChange | Fvs.n          | p-value        | MeanRatio   | FoldChange     | Fvs.n          | p-value   | MeanRatio      | FoldChange     | Fvs.n     | p-value      | MeanRatio      | FoldChange | Fvs.n        | p-value      | MeanRatio   | FoldChange   | Fvs.n        | p-value  | MeanRatio    | FoldChange   | Fvs.n    | p-value        |              |          |                |              |          |         |   |
| UC728162 | 0.754305  | -1.32572    | 106 down vs. n | 0.048113       | -2.07851  | 111 down vs. n | 0.481113       | -2.07851  | 111 down vs. n | -1.54413       | 1.54413    | 112 up vs. n   | 0.299712       | 2.99712     | 121 up vs. n   | 0.400993       | -2.47074  | 121 down vs. n | 0.148213       | 1.48213   | 135 up vs. n | 0.430954       | 4.30954    | 137 up vs. n | 0.430954     | 4.30954     | 153 up vs. n | 0.430954     | 4.30954  | 156 up vs. n | 0.379724     | 3.79724  | 156 up vs. n   | 0.407913     | 4.07913  | 1              |              |          |         |   |
| UC728165 | 1.248148  | 0.488325    | -2.07852       | 106 down vs. n | -1.54802  | 1.54802        | 111 down vs. n | 0.60802   | -1.49066       | 112 down vs. n | 1.562      | 1.562          | 121 down vs. n | 0.309408    | -2.31138       | 121 down vs. n | 0.478428  | -2.29018       | 121 down vs. n | 0.150055  | 1.50055      | 135 down vs. n | 0.380061   | 3.80609      | 137 up vs. n | 0.380061    | 3.80609      | 153 up vs. n | 0.380061 | 3.80609      | 156 up vs. n | -28.4361 | -28.4361       | 563 up vs. n | 0.116155 | 821.188        | 2.27E-13     |          |         |   |
| UC728170 | -0.130364 | -3.21922    | 106 down vs. n | 0.398918       | -1.53995  | 111 down vs. n | 0.398918       | -1.53995  | 111 down vs. n | -0.394066      | -1.53995   | 112 down vs. n | -0.394066      | -1.53995    | 121 down vs. n | 0.255742       | -2.50268  | 121 down vs. n | 0.255742       | -2.50268  | 135 up vs. n | 0.130042       | 1.30042    | 137 up vs. n | 0.130042     | 1.30042     | 153 up vs. n | 0.130042     | 1.30042  | 156 up vs. n | -0.023538    | -1.91008 | 537 down vs. n | 0.378997     | 3.78997  | 563 up vs. n   | 0.139931     | 1.39931  | 1       |   |
| UC728170 | 0.232707  | -1.20784    | 106 down vs. n | 1.13847        | 1.13847   | 111 up vs. n   | 0.39128        | 3.09128   | 112 up vs. n   | -0.39128       | 3.09128    | 121 up vs. n   | -0.39128       | 3.09128     | 121 up vs. n   | 0.244931       | 32.4931   | 121 up vs. n   | 0.244931       | 32.4931   | 135 up vs. n | 0.255742       | 2.55742    | 137 up vs. n | 0.255742     | 2.55742     | 153 up vs. n | 0.255742     | 2.55742  | 156 up vs. n | 0.255742     | 2.55742  | 156 up vs. n   | 0.255742     | 2.55742  | 1              |              |          |         |   |
| UC728170 | 0.310368  | -3.21918    | 106 down vs. n | 0.257698       | -2.57698  | 111 down vs. n | 0.257698       | -2.57698  | 111 down vs. n | 0.257698       | -2.57698   | 112 down vs. n | 0.257698       | -2.57698    | 121 down vs. n | 0.257698       | -2.57698  | 121 down vs. n | 0.257698       | -2.57698  | 135 up vs. n | 0.370044       | 3.70044    | 137 up vs. n | 0.370044     | 3.70044     | 153 up vs. n | 0.370044     | 3.70044  | 156 up vs. n | 0.370044     | 3.70044  | 156 up vs. n   | 0.370044     | 3.70044  | 563 up vs. n   | 0.370044     | 3.70044  | 1       |   |
| UC728179 | 1.40645   | 0.527509    | -1.8957        | 106 down vs. n | -0.527509 | 1.8957         | 111 down vs. n | -0.527509 | 1.8957         | 111 down vs. n | -0.527509  | 1.8957         | 112 down vs. n | -0.527509   | 1.8957         | 121 down vs. n | -0.527509 | 1.8957         | 121 down vs. n | -0.527509 | 1.8957       | 135 up vs. n   | 0.981455   | 9.81455      | 137 up vs. n | 0.981455    | 9.81455      | 153 up vs. n | 0.981455 | 9.81455      | 156 up vs. n | 0.981455 | 9.81455        | 156 up vs. n | 0.981455 | 9.81455        | 563 up vs. n | 0.981455 | 9.81455 | 1 |
| UC728179 | 0.565084  | -2.80823    | 106 down vs. n | 1.2592         | 1.2592    | 111 down vs. n | 0.632056       | -1.2004   | 112 down vs. n | 0.632056       | -1.2004    | 121 down vs. n | 0.632056       | -1.2004     | 121 down vs. n | 0.1256         | 1.256     | 135 up vs. n   | 0.1256         | 1.256     | 137 up vs. n | 0.150055       | 1.50055    | 137 up vs. n | 0.150055     | 1.50055     | 153 up vs. n | 0.150055     | 1.50055  | 156 up vs. n | 0.150055     | 1.50055  | 156 up vs. n   | 0.150055     | 1.50055  | 563 up vs. n   | 0.150055     | 1.50055  | 1       |   |
| UC728180 | 0.558884  | -1.70934    | 106 down vs. n | 0.205785       | -2.05785  | 111 down vs. n | 0.205785       | -2.05785  | 111 down vs. n | 0.205785       | -2.05785   | 112 down vs. n | 0.205785       | -2.05785    | 121 down vs. n | 0.205785       | -2.05785  | 121 down vs. n | 0.205785       | -2.05785  | 135 up vs. n | 0.139745       | 1.39745    | 137 up vs. n | 0.139745     | 1.39745     | 153 up vs. n | 0.139745     | 1.39745  | 156 up vs. n | 0.139745     | 1.39745  | 156 up vs. n   | 0.139745     | 1.39745  | 563 up vs. n   | 0.139745     | 1.39745  | 1       |   |
| UC728180 | 0.201526  | -2.01526    | 106 up vs. n   | 0.0902881      | -1.10757  | 111 down vs. n | 0.0902881      | -1.10757  | 111 down vs. n | 0.0902881      | -1.10757   | 112 down vs. n | 0.0902881      | -1.10757    | 121 down vs. n | 0.0902881      | -1.10757  | 121 down vs. n | 0.0902881      | -1.10757  | 135 up vs. n | 0.263632       | 2.63632    | 137 up vs. n | 0.263632     | 2.63632     | 153 up vs. n | 0.263632     | 2.63632  | 156 up vs. n | 0.263632     | 2.63632  | 156 up vs. n   | 0.263632     | 2.63632  | 563 down vs. n | 0.0485768    | 1.18236  | 1       |   |
| UC728180 | 0.0541954 | -18.4521    | 106 down vs. n | 0.84549        | 8.84549   | 111 up vs. n   | 0.84549        | 8.84549   | 111 up vs. n   | 0.84549        | 8.84549    | 112 up vs. n   | 0.84549        | 8.84549     | 121 up vs. n   | 0.84549        | 8.84549   | 121 up vs. n   | 0.84549        | 8.84549   | 135 up vs. n | 0.136148       | 1.36148    | 137 up vs. n | 0.136148     | 1.36148     | 153 up vs. n | 0.136148     | 1.36148  | 156 up vs. n | 0.136148     | 1.36148  | 156 up vs. n   | 0.136148     | 1.36148  | 563 up vs. n   | 0.136148     | 1.36148  | 1       |   |
| UC728180 | 0.080136  | -1.80212    | 106 down vs. n | 1.80212        | 1.80212   | 111 down vs. n | 1.80212        | 1.80212   | 111 down vs. n | 1.80212        | 1.80212    | 112 down vs. n | 1.80212        | 1.80212     | 121 down vs. n | 1.80212        | 1.80212   | 121 down vs. n | 1.80212        | 1.80212   | 135 up vs. n | 0.175752       | 1.75752    | 137 up vs. n | 0.175752     | 1.75752     | 153 up vs. n | 0.175752     | 1.75752  | 156 up vs. n | 0.175752     | 1.75752  | 156 up vs. n   | 0.175752     | 1.75752  | 563 up vs. n   | 0.175752     | 1.75752  | 1       |   |
| UC728190 | 0.157849  | -1.89215    | 106 down vs. n | 1.89215        | 1.89215   | 111 down vs. n | 1.89215        | 1.89215   | 111 down vs. n | 1.89215        | 1.89215    | 112 down vs. n | 1.89215        | 1.89215     | 121 down vs. n | 1.89215        | 1.89215   | 121 down vs. n | 1.89215        | 1.89215   | 135 up vs. n | 0.080517       | 0.80517    | 137 up vs. n | 0.080517     | 0.80517     | 153 up vs. n | 0.080517     | 0.80517  | 156 up vs. n | 0.080517     | 0.80517  | 156 up vs. n   | 0.080517     | 0.80517  | 563 up vs. n   | 0.080517     | 0.80517  | 1       |   |
| UC728195 | 0.676408  | -1.51124    | 106 down vs. n | -1.49642       | 1.49642   | 111 down vs. n | -1.49642       | 1.49642   | 111 down vs. n | -1.49642       | 1.49642    | 112 down vs. n | -1.49642       | 1.49642     | 121 down vs. n | -1.49642       | 1.49642   | 121 down vs. n | -1.49642       | 1.49642   | 135 up vs. n | 0.9416         | 9.416      | 137 up vs. n | 0.9416       | 9.416       | 153 up vs. n | 0.9416       | 9.416    | 156 up vs. n | 0.9416       | 9.416    | 156 up vs. n   | 0.9416       | 9.416    | 563 up vs. n   | 0.9416       | 9.416    | 1       |   |
| UC728196 | 0.185251  | -2.95751    | 106 down vs. n | 0.713516       | 7.13516   | 111 down vs. n | 0.713516       | 7.13516   | 111 down vs. n | 0.713516       | 7.13516    | 112 down vs. n | 0.713516       | 7.13516     | 121 down vs. n | 0.713516       | 7.13516   | 121 down vs. n | 0.713516       | 7.13516   | 135 up vs. n | 0.136148       | 1.36148    | 137 up vs. n | 0.136148     | 1.36148     | 153 up vs. n | 0.136148     | 1.36148  | 156 up vs. n | 0.136148     | 1.36148  | 156 up vs. n   | 0.136148     | 1.36148  | 563 up vs. n   | 0.136148     | 1.36148  | 1       |   |
| UC728199 | 0.188966  | -2.87123    | 106 down vs. n | 0.346363       | -2.87124  | 111 down vs. n | 0.346363       | -2.87124  | 111 down vs. n | 0.346363       | -2.87124   | 112 down vs. n | 0.346363       | -2.87124    | 121 down vs. n | 0.346363       | -2.87124  | 121 down vs. n | 0.346363       | -2.87124  | 135 up vs. n | 0.136148       | 1.36148    | 137 up vs. n | 0.136148     | 1.36148     | 153 up vs. n | 0.136148     | 1.36148  | 156 up vs. n | 0.136148     | 1.36148  | 156 up vs. n   | 0.136148     | 1.36148  | 563 up vs. n   | 0.136148     | 1.36148  | 1       |   |
| UC728202 | 0.146617  | -2.85023    | 106 down vs. n | 0.191048       | 1.91048   | 111 up vs. n   | 0.191048       | 1.91048   | 111 up vs. n   | 0.191048       | 1.91048    | 112 up vs. n   | 0.191048       | 1.91048     | 121 up vs. n   | 0.191048       | 1.91048   | 121 up vs. n   | 0.191048       | 1.91048   | 135 up vs. n | 0.136148       | 1.36148    | 137 up vs. n | 0.136148     | 1.36148     | 153 up vs. n | 0.136148     | 1.36148  | 156 up vs. n | 0.136148     | 1.36148  | 156 up vs. n   | 0.136148     | 1.36148  | 563 up vs. n   | 0.136148     | 1.36148  | 1       |   |
| UC728208 | 0.170475  | -2.89023    | 106 down vs. n | 0.301879       | 3.01879   | 111 up vs. n   | 0.301879       | 3.01879   | 111 up vs. n   | 0.301879       | 3.01879    | 112 up vs. n   | 0.301879       | 3.01879     | 121 up vs. n   | 0.301879       | 3.01879   | 121 up vs. n   | 0.301879       | 3.01879   | 135 up vs. n | 0.136148       | 1.36148    | 137 up vs. n | 0.136148     | 1.36148     | 153 up vs. n | 0.136148     | 1.36148  | 156 up vs. n | 0.136148     | 1.36148  | 156 up vs. n   | 0.136148     | 1.36148  | 563 up vs. n   | 0.136148     | 1.36148  | 1       |   |
| UC728208 | 0.170475  | -2.89023    | 106 down vs. n | 0.301879       | 3.01879   | 111 up vs. n   | 0.301879       | 3.01879   | 111 up vs. n   | 0.301879       | 3.01879    | 112 up vs. n   | 0.301879       | 3.01879     | 121 up vs. n   | 0.301879       | 3.01879   | 121 up vs. n   | 0.301879       | 3.01879   | 135 up vs. n | 0.136148       | 1.36148    | 137 up vs. n | 0.136148     | 1.36148     | 153 up vs. n | 0.136148     | 1.36148  | 156 up vs. n | 0.136148     | 1.36148  | 156 up vs. n   | 0.136148     | 1.36148  | 563 up vs. n   | 0.136148     | 1.36148  | 1       |   |
| UC728210 | -0.055625 | -17.9784    | 106 down vs. n | 0.781425       | -1.27971  | 111 down vs. n | 0.781425       | -1.27971  | 111 down vs. n | 0.781425       | -1.27971   | 112 down vs. n | 0.781425       | -1.27971    | 121 down vs. n | 0.781425       | -1.27971  | 121 down vs. n | 0.781425       | -1.27971  | 135 up vs. n | 0.136148       | 1.36148    | 137 up vs. n | 0.136148     | 1.36148     | 153 up vs. n | 0.136148     | 1.36148  | 156 up vs. n | 0.136148     | 1.36148  | 156 up vs. n   | 0.136148     | 1.36148  | 563 up vs. n   | 0.136148     | 1.36148  | 1       |   |
| UC728210 | -0.204052 | -4.90071    | 106 down vs. n | 1.58189        | 1.58189   | 111 up vs. n   | 1.58189        | 1.58189   | 111 up vs. n   | 1.58189        | 1.58189    | 112 up vs. n   | 1.58189        | 1.58189     | 121 up vs. n   | 1.58189        | 1.58189   | 121 up vs. n   | 1.58189        | 1.58189   | 135 up vs. n | 0.136148       | 1.36148    | 137 up vs. n | 0.136148     | 1.36148     | 153 up vs. n | 0.136148     | 1.36148  | 156 up vs. n | 0.136148     | 1.36148  | 156 up vs. n   | 0.136148     | 1.36148  | 563 up vs. n   | 0.136148     | 1.36148  | 1       |   |
| UC728211 | 1.64083   | -1.64083    | 106 up vs. n   | 0.180356       | -11.9111  | 111 down vs. n | 0.180356       | -11.9111  | 111 down vs. n | 0.180356       | -11.9111   | 112 down vs. n | 0.180356       | -11.9111    | 121 down vs. n | 0.180356       | -11.9111  | 121 down vs. n | 0.180356       | -11.9111  | 135 up vs. n | 0.136148       | 1.36148    | 137 up vs. n | 0.136148     | 1.36148     | 153 up vs. n | 0.136148     | 1.36148  | 156 up vs. n | 0.136148     | 1.36148  | 156 up vs. n   | 0.136148     | 1.36148  | 563 up vs. n   | 0.136148     | 1.36148  | 1       |   |
| UC728211 | 0.308497  | -           |                |                |           |                |                |           |                |                |            |                |                |             |                |                |           |                |                |           |              |                |            |              |              |             |              |              |          |              |              |          |                |              |          |                |              |          |         |   |

File: ESM\_10 (Online Resource 10)

**Title:** Comparing Multidimensional Molecular Analyses of Pediatric Diffuse Intrinsic Gliomas Reveals Distinct Molecular Subtypes  
**Journal:** Acta Neuropathologica

**Authors:** Amanda M. Stransik, Madhuri Kumbhakar, Kendall Snyder, Sidicki Yavuz, Joe Devenney,

Breanna Harmon, Jordan Hall, Eric H. Rubie, Ping An, Melanie Weigant, Brian Reid, Sarah Mages, Roger J. Packer, Javad Nazarian

**Corresponding Author:**

Javad Nazarian, Children's National Medical Center, Center for Genetic Medicine,

111 Michigan Ave., NW, Washington DC, 20010

Phone: 202-476-6014; Fax: 202-476-6014

Email: J.Nazarian@CNMC.org

| Gene ID | vs. n | FolChang[106] |  | p | FolChang[107] |  | p | FolChang[108] |  | p | FolChang[109] |  | p | FolChang[110] |  | p | FolChang[111] |  | p | FolChang[112] |  | p | FolChang[113] |  | p | FolChang[114] |  | p | FolChang[115] |  | p | FolChang[116] |  | p | FolChang[117] |  | p | FolChang[118] |  | p | FolChang[119] |  | p | FolChang[120] |  | p | FolChang[121] |  | p | FolChang[122] |  | p | FolChang[123] |  | p | FolChang[124] |  | p | FolChang[125] |  | p | FolChang[126] |  | p | FolChang[127] |  | p | FolChang[128] |  | p | FolChang[129] |  | p | FolChang[130] |  | p | FolChang[131] |  | p | FolChang[132] |  | p | FolChang[133] |  | p | FolChang[134] |  | p | FolChang[135] |  | p | FolChang[136] |  | p | FolChang[137] |  | p | FolChang[138] |  | p | FolChang[139] |  | p | FolChang[140] |  | p | FolChang[141] |  | p | FolChang[142] |  | p | FolChang[143] |  | p | FolChang[144] |  | p | FolChang[145] |  | p | FolChang[146] |  | p | FolChang[147] |  | p | FolChang[148] |  | p | FolChang[149] |  | p | FolChang[150] |  | p | FolChang[151] |  | p | FolChang[152] |  | p | FolChang[153] |  | p | FolChang[154] |  | p | FolChang[155] |  | p | FolChang[156] |  | p | FolChang[157] |  | p | FolChang[158] |  | p | FolChang[159] |  | p | FolChang[160] |  | p | FolChang[161] |  | p | FolChang[162] |  | p | FolChang[163] |  | p | FolChang[164] |  | p | FolChang[165] |  | p | FolChang[166] |  | p | FolChang[167] |  | p | FolChang[168] |  | p | FolChang[169] |  | p | FolChang[170] |  | p | FolChang[171] |  | p | FolChang[172] |  | p | FolChang[173] |  | p | FolChang[174] |  | p | FolChang[175] |  | p | FolChang[176] |  | p | FolChang[177] |  | p | FolChang[178] |  | p | FolChang[179] |  | p | FolChang[180] |  | p | FolChang[181] |  | p | FolChang[182] |  | p | FolChang[183] |  | p | FolChang[184] |  | p | FolChang[185] |  | p | FolChang[186] |  | p | FolChang[187] |  | p | FolChang[188] |  | p | FolChang[189] |  | p | FolChang[190] |  | p | FolChang[191] |  | p | FolChang[192] |  | p | FolChang[193] |  | p | FolChang[194] |  | p | FolChang[195] |  | p | FolChang[196] |  | p | FolChang[197] |  | p | FolChang[198] |  | p | FolChang[199] |  | p | FolChang[200] |  | p | FolChang[201] |  | p | FolChang[202] |  | p | FolChang[203] |  | p | FolChang[204] |  | p | FolChang[205] |  | p | FolChang[206] |  | p | FolChang[207] |  | p | FolChang[208] |  | p | FolChang[209] |  | p | FolChang[210] |  | p | FolChang[211] |  | p | FolChang[212] |  | p | FolChang[213] |  | p | FolChang[214] |  | p | FolChang[215] |  | p | FolChang[216] |  | p | FolChang[217] |  | p | FolChang[218] |  | p | FolChang[219] |  | p | FolChang[220] |  | p | FolChang[221] |  | p | FolChang[222] |  | p | FolChang[223] |  | p | FolChang[224] |  | p | FolChang[225] |  | p | FolChang[226] |  | p | FolChang[227] |  | p | FolChang[228] |  | p | FolChang[229] |  | p | FolChang[230] |  | p | FolChang[231] |  | p | FolChang[232] |  | p | FolChang[233] |  | p | FolChang[234] |  | p | FolChang[235] |  | p | FolChang[236] |  | p | FolChang[237] |  | p | FolChang[238] |  | p | FolChang[239] |  | p | FolChang[240] |  | p | FolChang[241] |  | p | FolChang[242] |  | p | FolChang[243] |  | p | FolChang[244] |  | p | FolChang[245] |  | p | FolChang[246] |  | p | FolChang[247] |  | p | FolChang[248] |  | p | FolChang[249] |  | p | FolChang[250] |  | p | FolChang[251] |  | p | FolChang[252] |  | p | FolChang[253] |  | p | FolChang[254] |  | p | FolChang[255] |  | p | FolChang[256] |  | p | FolChang[257] |  | p | FolChang[258] |  | p | FolChang[259] |  | p | FolChang[260] |  | p | FolChang[261] |  | p | FolChang[262] |  | p | FolChang[263] |  | p | FolChang[264] |  | p | FolChang[265] |  | p | FolChang[266] |  | p | FolChang[267] |  | p | FolChang[268] |  | p | FolChang[269] |  | p | FolChang[270] |  | p | FolChang[271] |  | p | FolChang[272] |  | p | FolChang[273] |  | p | FolChang[274] |  | p | FolChang[275] |  | p | FolChang[276] |  | p | FolChang[277] |  | p | FolChang[278] |  | p | FolChang[279] |  | p | FolChang[280] |  | p | FolChang[281] |  | p | FolChang[282] |  | p | FolChang[283] |  | p | FolChang[284] |  | p | FolChang[285] |  | p | FolChang[286] |  | p | FolChang[287] |  | p | FolChang[288] |  | p | FolChang[289] |  | p | FolChang[290] |  | p | FolChang[291] |  | p | FolChang[292] |  | p | FolChang[293] |  | p | FolChang[294] |  | p | FolChang[295] |  | p | FolChang[296] |  | p | FolChang[297] |  | p | FolChang[298] |  | p | FolChang[299] |  | p | FolChang[300] |  | p | FolChang[301] |  | p | FolChang[302] |  | p | FolChang[303] |  | p | FolChang[304] |  | p | FolChang[305] |  | p | FolChang[306] |  | p | FolChang[307] |  | p | FolChang[308] |  | p | FolChang[309] |  | p | FolChang[310] |  | p | FolChang[311] |  | p | FolChang[312] |  | p | FolChang[313] |  | p | FolChang[314] |  | p | FolChang[315] |  | p | FolChang[316] |  | p | FolChang[317] |  | p | FolChang[318] |  | p | FolChang[319] |  | p | FolChang[320] |  | p | FolChang[321] |  | p | FolChang[322] |  | p | FolChang[323] |  | p | FolChang[324] |  | p | FolChang[325] |  | p | FolChang[326] |  | p | FolChang[327] |  | p | FolChang[328] |  | p | FolChang[329] |  | p | FolChang[330] |  | p | FolChang[331] |  | p | FolChang[332] |  | p | FolChang[333] |  | p | FolChang[334] |  | p | FolChang[335] |  | p | FolChang[336] |  | p | FolChang[337] |  | p | FolChang[338] |  | p | FolChang[339] |  | p | FolChang[340] |  | p | FolChang[341] |  | p | FolChang[342] |  | p | FolChang[343] |  | p | FolChang[344] |  | p | FolChang[345] |  | p | FolChang[346] |  | p | FolChang[347] |  | p | FolChang[348] |  | p | FolChang[349] |  | p | FolChang[350] |  | p | FolChang[351] |  | p | FolChang[352] |  | p | FolChang[353] |  | p | FolChang[354] |  | p | FolChang[355] |  | p | FolChang[356] |  | p | FolChang[357] |  |
|---------|-------|---------------|--|---|---------------|--|---|---------------|--|---|---------------|--|---|---------------|--|---|---------------|--|---|---------------|--|---|---------------|--|---|---------------|--|---|---------------|--|---|---------------|--|---|---------------|--|---|---------------|--|---|---------------|--|---|---------------|--|---|---------------|--|---|---------------|--|---|---------------|--|---|---------------|--|---|---------------|--|---|---------------|--|---|---------------|--|---|---------------|--|---|---------------|--|---|---------------|--|---|---------------|--|---|---------------|--|---|---------------|--|---|---------------|--|---|---------------|--|---|---------------|--|---|---------------|--|---|---------------|--|---|---------------|--|---|---------------|--|---|---------------|--|---|---------------|--|---|---------------|--|---|---------------|--|---|---------------|--|---|---------------|--|---|---------------|--|---|---------------|--|---|---------------|--|---|---------------|--|---|---------------|--|---|---------------|--|---|---------------|--|---|---------------|--|---|---------------|--|---|---------------|--|---|---------------|--|---|---------------|--|---|---------------|--|---|---------------|--|---|---------------|--|---|---------------|--|---|---------------|--|---|---------------|--|---|---------------|--|---|---------------|--|---|---------------|--|---|---------------|--|---|---------------|--|---|---------------|--|---|---------------|--|---|---------------|--|---|---------------|--|---|---------------|--|---|---------------|--|---|---------------|--|---|---------------|--|---|---------------|--|---|---------------|--|---|---------------|--|---|---------------|--|---|---------------|--|---|---------------|--|---|---------------|--|---|---------------|--|---|---------------|--|---|---------------|--|---|---------------|--|---|---------------|--|---|---------------|--|---|---------------|--|---|---------------|--|---|---------------|--|---|---------------|--|---|---------------|--|---|---------------|--|---|---------------|--|---|---------------|--|---|---------------|--|---|---------------|--|---|---------------|--|---|---------------|--|---|---------------|--|---|---------------|--|---|---------------|--|---|---------------|--|---|---------------|--|---|---------------|--|---|---------------|--|---|---------------|--|---|---------------|--|---|---------------|--|---|---------------|--|---|---------------|--|---|---------------|--|---|---------------|--|---|---------------|--|---|---------------|--|---|---------------|--|---|---------------|--|---|---------------|--|---|---------------|--|---|---------------|--|---|---------------|--|---|---------------|--|---|---------------|--|---|---------------|--|---|---------------|--|---|---------------|--|---|---------------|--|---|---------------|--|---|---------------|--|---|---------------|--|---|---------------|--|---|---------------|--|---|---------------|--|---|---------------|--|---|---------------|--|---|---------------|--|---|---------------|--|---|---------------|--|---|---------------|--|---|---------------|--|---|---------------|--|---|---------------|--|---|---------------|--|---|---------------|--|---|---------------|--|---|---------------|--|---|---------------|--|---|---------------|--|---|---------------|--|---|---------------|--|---|---------------|--|---|---------------|--|---|---------------|--|---|---------------|--|---|---------------|--|---|---------------|--|---|---------------|--|---|---------------|--|---|---------------|--|---|---------------|--|---|---------------|--|---|---------------|--|---|---------------|--|---|---------------|--|---|---------------|--|---|---------------|--|---|---------------|--|---|---------------|--|---|---------------|--|---|---------------|--|---|---------------|--|---|---------------|--|---|---------------|--|---|---------------|--|---|---------------|--|---|---------------|--|---|---------------|--|---|---------------|--|---|---------------|--|---|---------------|--|---|---------------|--|---|---------------|--|---|---------------|--|---|---------------|--|---|---------------|--|---|---------------|--|---|---------------|--|---|---------------|--|---|---------------|--|---|---------------|--|---|---------------|--|---|---------------|--|---|---------------|--|---|---------------|--|---|---------------|--|---|---------------|--|---|---------------|--|---|---------------|--|---|---------------|--|---|---------------|--|---|---------------|--|---|---------------|--|---|---------------|--|---|---------------|--|---|---------------|--|---|---------------|--|---|---------------|--|---|---------------|--|---|---------------|--|---|---------------|--|---|---------------|--|---|---------------|--|---|---------------|--|---|---------------|--|---|---------------|--|---|---------------|--|---|---------------|--|---|---------------|--|---|---------------|--|---|---------------|--|---|---------------|--|---|---------------|--|---|---------------|--|---|---------------|--|---|---------------|--|---|---------------|--|---|---------------|--|---|---------------|--|---|---------------|--|---|---------------|--|---|---------------|--|---|---------------|--|---|---------------|--|---|---------------|--|---|---------------|--|---|---------------|--|---|---------------|--|---|---------------|--|---|---------------|--|---|---------------|--|---|---------------|--|---|---------------|--|---|---------------|--|---|---------------|--|---|---------------|--|---|---------------|--|---|---------------|--|---|---------------|--|---|---------------|--|---|---------------|--|---|---------------|--|---|---------------|--|---|---------------|--|---|---------------|--|
|---------|-------|---------------|--|---|---------------|--|---|---------------|--|---|---------------|--|---|---------------|--|---|---------------|--|---|---------------|--|---|---------------|--|---|---------------|--|---|---------------|--|---|---------------|--|---|---------------|--|---|---------------|--|---|---------------|--|---|---------------|--|---|---------------|--|---|---------------|--|---|---------------|--|---|---------------|--|---|---------------|--|---|---------------|--|---|---------------|--|---|---------------|--|---|---------------|--|---|---------------|--|---|---------------|--|---|---------------|--|---|---------------|--|---|---------------|--|---|---------------|--|---|---------------|--|---|---------------|--|---|---------------|--|---|---------------|--|---|---------------|--|---|---------------|--|---|---------------|--|---|---------------|--|---|---------------|--|---|---------------|--|---|---------------|--|---|---------------|--|---|---------------|--|---|---------------|--|---|---------------|--|---|---------------|--|---|---------------|--|---|---------------|--|---|---------------|--|---|---------------|--|---|---------------|--|---|---------------|--|---|---------------|--|---|---------------|--|---|---------------|--|---|---------------|--|---|---------------|--|---|---------------|--|---|---------------|--|---|---------------|--|---|---------------|--|---|---------------|--|---|---------------|--|---|---------------|--|---|---------------|--|---|---------------|--|---|---------------|--|---|---------------|--|---|---------------|--|---|---------------|--|---|---------------|--|---|---------------|--|---|---------------|--|---|---------------|--|---|---------------|--|---|---------------|--|---|---------------|--|---|---------------|--|---|---------------|--|---|---------------|--|---|---------------|--|---|---------------|--|---|---------------|--|---|---------------|--|---|---------------|--|---|---------------|--|---|---------------|--|---|---------------|--|---|---------------|--|---|---------------|--|---|---------------|--|---|---------------|--|---|---------------|--|---|---------------|--|---|---------------|--|---|---------------|--|---|---------------|--|---|---------------|--|---|---------------|--|---|---------------|--|---|---------------|--|---|---------------|--|---|---------------|--|---|---------------|--|---|---------------|--|---|---------------|--|---|---------------|--|---|---------------|--|---|---------------|--|---|---------------|--|---|---------------|--|---|---------------|--|---|---------------|--|---|---------------|--|---|---------------|--|---|---------------|--|---|---------------|--|---|---------------|--|---|---------------|--|---|---------------|--|---|---------------|--|---|---------------|--|---|---------------|--|---|---------------|--|---|---------------|--|---|---------------|--|---|---------------|--|---|---------------|--|---|---------------|--|---|---------------|--|---|---------------|--|---|---------------|--|---|---------------|--|---|---------------|--|---|---------------|--|---|---------------|--|---|---------------|--|---|---------------|--|---|---------------|--|---|---------------|--|---|---------------|--|---|---------------|--|---|---------------|--|---|---------------|--|---|---------------|--|---|---------------|--|---|---------------|--|---|---------------|--|---|---------------|--|---|---------------|--|---|---------------|--|---|---------------|--|---|---------------|--|---|---------------|--|---|---------------|--|---|---------------|--|---|---------------|--|---|---------------|--|---|---------------|--|---|---------------|--|---|---------------|--|---|---------------|--|---|---------------|--|---|---------------|--|---|---------------|--|---|---------------|--|---|---------------|--|---|---------------|--|---|---------------|--|---|---------------|--|---|---------------|--|---|---------------|--|---|---------------|--|---|---------------|--|---|---------------|--|---|---------------|--|---|---------------|--|---|---------------|--|---|---------------|--|---|---------------|--|---|---------------|--|---|---------------|--|---|---------------|--|---|---------------|--|---|---------------|--|---|---------------|--|---|---------------|--|---|---------------|--|---|---------------|--|---|---------------|--|---|---------------|--|---|---------------|--|---|---------------|--|---|---------------|--|---|---------------|--|---|---------------|--|---|---------------|--|---|---------------|--|---|---------------|--|---|---------------|--|---|---------------|--|---|---------------|--|---|---------------|--|---|---------------|--|---|---------------|--|---|---------------|--|---|---------------|--|---|---------------|--|---|---------------|--|---|---------------|--|---|---------------|--|---|---------------|--|---|---------------|--|---|---------------|--|---|---------------|--|---|---------------|--|---|---------------|--|---|---------------|--|---|---------------|--|---|---------------|--|---|---------------|--|---|---------------|--|---|---------------|--|---|---------------|--|---|---------------|--|---|---------------|--|---|---------------|--|---|---------------|--|---|---------------|--|---|---------------|--|---|---------------|--|---|---------------|--|---|---------------|--|---|---------------|--|---|---------------|--|---|---------------|--|---|---------------|--|---|---------------|--|---|---------------|--|---|---------------|--|---|---------------|--|---|---------------|--|---|---------------|--|---|---------------|--|---|---------------|--|---|---------------|--|---|---------------|--|---|---------------|--|---|---------------|--|---|---------------|--|---|---------------|--|---|---------------|--|

File: ISM\_10 (On-line Release)

Title: 10

Figure: Comparative Multidimensional Molecular Analyses of Pediatric Diffuse Intrinsic Piloic Gliona Reveals Distinct Molecular Subtypes

Journal: Acta Neuropathologica

Authors: Amanda M. Stransky, Madhuri Kumbhakar, Kendall Snyder, Sidicki Yavuz, Joe Deveney,

Breanna Harmon, Jordan Hall, Eric H. Ruabe, Ping An, Melanie Weingart, Brian Ross, Sarah Magee, Roger J. Packer, Javad Nazarian

Corresponding Author:

Javad Nazarian, Children's National Medical Center, Center for Genetic Medicine,

111 Michigan Ave., NW, Washington DC, 20010

Phone: 202-476-6022 Fax: 202-476-6014

Email: J.Nazarian@CNMC.org

| Gene ID | P | vs. n | FOLDCHANG10 | p | FOLDCHANG11 | p | FOLDCHANG12 | p | FOLDCHANG13 | p | FOLDCHANG14 | p | FOLDCHANG15 | p | FOLDCHANG16 | p | FOLDCHANG17 | p | FOLDCHANG18 | p | FOLDCHANG19 | p | FOLDCHANG20 | p | FOLDCHANG21 | p | FOLDCHANG22 | p | FOLDCHANG23 | p | FOLDCHANG24 | p | FOLDCHANG25 | p | FOLDCHANG26 | p | FOLDCHANG27 | p | FOLDCHANG28 | p | FOLDCHANG29 | p | FOLDCHANG30 | p | FOLDCHANG31 | p | FOLDCHANG32 | p | FOLDCHANG33 | p | FOLDCHANG34 | p | FOLDCHANG35 | p | FOLDCHANG36 | p | FOLDCHANG37 | p | FOLDCHANG38 | p | FOLDCHANG39 | p | FOLDCHANG40 | p | FOLDCHANG41 | p | FOLDCHANG42 | p | FOLDCHANG43 | p | FOLDCHANG44 | p | FOLDCHANG45 | p | FOLDCHANG46 | p | FOLDCHANG47 | p | FOLDCHANG48 | p | FOLDCHANG49 | p | FOLDCHANG50 | p | FOLDCHANG51 | p | FOLDCHANG52 | p | FOLDCHANG53 | p | FOLDCHANG54 | p | FOLDCHANG55 | p | FOLDCHANG56 | p | FOLDCHANG57 | p | FOLDCHANG58 | p | FOLDCHANG59 | p | FOLDCHANG60 | p | FOLDCHANG61 | p | FOLDCHANG62 | p | FOLDCHANG63 | p | FOLDCHANG64 | p | FOLDCHANG65 | p | FOLDCHANG66 | p | FOLDCHANG67 | p | FOLDCHANG68 | p | FOLDCHANG69 | p | FOLDCHANG70 | p | FOLDCHANG71 | p | FOLDCHANG72 | p | FOLDCHANG73 | p | FOLDCHANG74 | p | FOLDCHANG75 | p | FOLDCHANG76 | p | FOLDCHANG77 | p | FOLDCHANG78 | p | FOLDCHANG79 | p | FOLDCHANG80 | p | FOLDCHANG81 | p | FOLDCHANG82 | p | FOLDCHANG83 | p | FOLDCHANG84 | p | FOLDCHANG85 | p | FOLDCHANG86 | p | FOLDCHANG87 | p | FOLDCHANG88 | p | FOLDCHANG89 | p | FOLDCHANG90 | p | FOLDCHANG91 | p | FOLDCHANG92 | p | FOLDCHANG93 | p | FOLDCHANG94 | p | FOLDCHANG95 | p | FOLDCHANG96 | p | FOLDCHANG97 | p | FOLDCHANG98 | p | FOLDCHANG99 | p | FOLDCHANG100 | p | FOLDCHANG101 | p | FOLDCHANG102 | p | FOLDCHANG103 | p | FOLDCHANG104 | p | FOLDCHANG105 | p | FOLDCHANG106 | p | FOLDCHANG107 | p | FOLDCHANG108 | p | FOLDCHANG109 | p | FOLDCHANG110 | p | FOLDCHANG111 | p | FOLDCHANG112 | p | FOLDCHANG113 | p | FOLDCHANG114 | p | FOLDCHANG115 | p | FOLDCHANG116 | p | FOLDCHANG117 | p | FOLDCHANG118 | p | FOLDCHANG119 | p | FOLDCHANG120 | p | FOLDCHANG121 | p | FOLDCHANG122 | p | FOLDCHANG123 | p | FOLDCHANG124 | p | FOLDCHANG125 | p | FOLDCHANG126 | p | FOLDCHANG127 | p | FOLDCHANG128 | p | FOLDCHANG129 | p | FOLDCHANG130 | p | FOLDCHANG131 | p | FOLDCHANG132 | p | FOLDCHANG133 | p | FOLDCHANG134 | p | FOLDCHANG135 | p | FOLDCHANG136 | p | FOLDCHANG137 | p | FOLDCHANG138 | p | FOLDCHANG139 | p | FOLDCHANG140 | p | FOLDCHANG141 | p | FOLDCHANG142 | p | FOLDCHANG143 | p | FOLDCHANG144 | p | FOLDCHANG145 | p | FOLDCHANG146 | p | FOLDCHANG147 | p | FOLDCHANG148 | p | FOLDCHANG149 | p | FOLDCHANG150 | p | FOLDCHANG151 | p | FOLDCHANG152 | p | FOLDCHANG153 | p | FOLDCHANG154 | p | FOLDCHANG155 | p | FOLDCHANG156 | p | FOLDCHANG157 | p | FOLDCHANG158 | p | FOLDCHANG159 | p | FOLDCHANG160 | p | FOLDCHANG161 | p | FOLDCHANG162 | p | FOLDCHANG163 | p | FOLDCHANG164 | p | FOLDCHANG165 | p | FOLDCHANG166 | p | FOLDCHANG167 | p | FOLDCHANG168 | p | FOLDCHANG169 | p | FOLDCHANG170 | p | FOLDCHANG171 | p | FOLDCHANG172 | p | FOLDCHANG173 | p | FOLDCHANG174 | p | FOLDCHANG175 | p | FOLDCHANG176 | p | FOLDCHANG177 | p | FOLDCHANG178 | p | FOLDCHANG179 | p | FOLDCHANG180 | p | FOLDCHANG181 | p | FOLDCHANG182 | p | FOLDCHANG183 | p | FOLDCHANG184 | p | FOLDCHANG185 | p | FOLDCHANG186 | p | FOLDCHANG187 | p | FOLDCHANG188 | p | FOLDCHANG189 | p | FOLDCHANG190 | p | FOLDCHANG191 | p | FOLDCHANG192 | p | FOLDCHANG193 | p | FOLDCHANG194 | p | FOLDCHANG195 | p | FOLDCHANG196 | p | FOLDCHANG197 | p | FOLDCHANG198 | p | FOLDCHANG199 | p | FOLDCHANG200 | p | FOLDCHANG201 | p | FOLDCHANG202 | p | FOLDCHANG203 | p | FOLDCHANG204 | p | FOLDCHANG205 | p | FOLDCHANG206 | p | FOLDCHANG207 | p | FOLDCHANG208 | p | FOLDCHANG209 | p | FOLDCHANG210 | p | FOLDCHANG211 | p | FOLDCHANG212 | p | FOLDCHANG213 | p | FOLDCHANG214 | p | FOLDCHANG215 | p | FOLDCHANG216 | p | FOLDCHANG217 | p | FOLDCHANG218 | p | FOLDCHANG219 | p | FOLDCHANG220 | p | FOLDCHANG221 | p | FOLDCHANG222 | p | FOLDCHANG223 | p | FOLDCHANG224 | p | FOLDCHANG225 | p | FOLDCHANG226 | p | FOLDCHANG227 | p | FOLDCHANG228 | p | FOLDCHANG229 | p | FOLDCHANG230 | p | FOLDCHANG231 | p | FOLDCHANG232 | p | FOLDCHANG233 | p | FOLDCHANG234 | p | FOLDCHANG235 | p | FOLDCHANG236 | p | FOLDCHANG237 | p | FOLDCHANG238 | p | FOLDCHANG239 | p | FOLDCHANG240 | p | FOLDCHANG241 | p | FOLDCHANG242 | p | FOLDCHANG243 | p | FOLDCHANG244 | p | FOLDCHANG245 | p | FOLDCHANG246 | p | FOLDCHANG247 | p | FOLDCHANG248 | p | FOLDCHANG249 | p | FOLDCHANG250 | p | FOLDCHANG251 | p | FOLDCHANG252 | p | FOLDCHANG253 | p | FOLDCHANG254 | p | FOLDCHANG255 | p | FOLDCHANG256 | p | FOLDCHANG257 | p | FOLDCHANG258 | p | FOLDCHANG259 | p | FOLDCHANG260 | p | FOLDCHANG261 | p | FOLDCHANG262 | p | FOLDCHANG263 | p | FOLDCHANG264 | p | FOLDCHANG265 | p | FOLDCHANG266 | p | FOLDCHANG267 | p | FOLDCHANG268 | p | FOLDCHANG269 | p | FOLDCHANG270 | p | FOLDCHANG271 | p | FOLDCHANG272 | p | FOLDCHANG273 | p | FOLDCHANG274 | p | FOLDCHANG275 | p | FOLDCHANG276 | p | FOLDCHANG277 | p | FOLDCHANG278 | p | FOLDCHANG279 | p | FOLDCHANG280 | p | FOLDCHANG281 | p | FOLDCHANG282 | p | FOLDCHANG283 | p | FOLDCHANG284 | p | FOLDCHANG285 | p | FOLDCHANG286 | p | FOLDCHANG287 | p | FOLDCHANG288 | p | FOLDCHANG289 | p | FOLDCHANG290 | p | FOLDCHANG291 | p | FOLDCHANG292 | p | FOLDCHANG293 | p | FOLDCHANG294 | p | FOLDCHANG295 | p | FOLDCHANG296 | p | FOLDCHANG297 | p | FOLDCHANG298 | p | FOLDCHANG299 | p | FOLDCHANG300 | p | FOLDCHANG301 | p | FOLDCHANG302 | p | FOLDCHANG303 | p | FOLDCHANG304 | p | FOLDCHANG305 | p | FOLDCHANG306 | p | FOLDCHANG307 | p | FOLDCHANG308 | p | FOLDCHANG309 | p | FOLDCHANG310 | p | FOLDCHANG311 | p | FOLDCHANG312 | p | FOLDCHANG313 | p | FOLDCHANG314 | p | FOLDCHANG315 | p | FOLDCHANG316 | p | FOLDCHANG317 | p | FOLDCHANG318 | p | FOLDCHANG319 | p | FOLDCHANG320 | p | FOLDCHANG321 | p |
|---------|---|-------|-------------|---|-------------|---|-------------|---|-------------|---|-------------|---|-------------|---|-------------|---|-------------|---|-------------|---|-------------|---|-------------|---|-------------|---|-------------|---|-------------|---|-------------|---|-------------|---|-------------|---|-------------|---|-------------|---|-------------|---|-------------|---|-------------|---|-------------|---|-------------|---|-------------|---|-------------|---|-------------|---|-------------|---|-------------|---|-------------|---|-------------|---|-------------|---|-------------|---|-------------|---|-------------|---|-------------|---|-------------|---|-------------|---|-------------|---|-------------|---|-------------|---|-------------|---|-------------|---|-------------|---|-------------|---|-------------|---|-------------|---|-------------|---|-------------|---|-------------|---|-------------|---|-------------|---|-------------|---|-------------|---|-------------|---|-------------|---|-------------|---|-------------|---|-------------|---|-------------|---|-------------|---|-------------|---|-------------|---|-------------|---|-------------|---|-------------|---|-------------|---|-------------|---|-------------|---|-------------|---|-------------|---|-------------|---|-------------|---|-------------|---|-------------|---|-------------|---|-------------|---|-------------|---|-------------|---|-------------|---|-------------|---|-------------|---|-------------|---|-------------|---|-------------|---|-------------|---|-------------|---|-------------|---|-------------|---|-------------|---|--------------|---|--------------|---|--------------|---|--------------|---|--------------|---|--------------|---|--------------|---|--------------|---|--------------|---|--------------|---|--------------|---|--------------|---|--------------|---|--------------|---|--------------|---|--------------|---|--------------|---|--------------|---|--------------|---|--------------|---|--------------|---|--------------|---|--------------|---|--------------|---|--------------|---|--------------|---|--------------|---|--------------|---|--------------|---|--------------|---|--------------|---|--------------|---|--------------|---|--------------|---|--------------|---|--------------|---|--------------|---|--------------|---|--------------|---|--------------|---|--------------|---|--------------|---|--------------|---|--------------|---|--------------|---|--------------|---|--------------|---|--------------|---|--------------|---|--------------|---|--------------|---|--------------|---|--------------|---|--------------|---|--------------|---|--------------|---|--------------|---|--------------|---|--------------|---|--------------|---|--------------|---|--------------|---|--------------|---|--------------|---|--------------|---|--------------|---|--------------|---|--------------|---|--------------|---|--------------|---|--------------|---|--------------|---|--------------|---|--------------|---|--------------|---|--------------|---|--------------|---|--------------|---|--------------|---|--------------|---|--------------|---|--------------|---|--------------|---|--------------|---|--------------|---|--------------|---|--------------|---|--------------|---|--------------|---|--------------|---|--------------|---|--------------|---|--------------|---|--------------|---|--------------|---|--------------|---|--------------|---|--------------|---|--------------|---|--------------|---|--------------|---|--------------|---|--------------|---|--------------|---|--------------|---|--------------|---|--------------|---|--------------|---|--------------|---|--------------|---|--------------|---|--------------|---|--------------|---|--------------|---|--------------|---|--------------|---|--------------|---|--------------|---|--------------|---|--------------|---|--------------|---|--------------|---|--------------|---|--------------|---|--------------|---|--------------|---|--------------|---|--------------|---|--------------|---|--------------|---|--------------|---|--------------|---|--------------|---|--------------|---|--------------|---|--------------|---|--------------|---|--------------|---|--------------|---|--------------|---|--------------|---|--------------|---|--------------|---|--------------|---|--------------|---|--------------|---|--------------|---|--------------|---|--------------|---|--------------|---|--------------|---|--------------|---|--------------|---|--------------|---|--------------|---|--------------|---|--------------|---|--------------|---|--------------|---|--------------|---|--------------|---|--------------|---|--------------|---|--------------|---|--------------|---|--------------|---|--------------|---|--------------|---|--------------|---|--------------|---|--------------|---|--------------|---|--------------|---|--------------|---|--------------|---|--------------|---|--------------|---|--------------|---|--------------|---|--------------|---|--------------|---|--------------|---|--------------|---|--------------|---|--------------|---|--------------|---|--------------|---|--------------|---|--------------|---|--------------|---|--------------|---|--------------|---|--------------|---|--------------|---|--------------|---|--------------|---|--------------|---|--------------|---|--------------|---|--------------|---|--------------|---|--------------|---|--------------|---|--------------|---|--------------|---|--------------|---|--------------|---|--------------|---|--------------|---|--------------|---|--------------|---|--------------|---|--------------|---|--------------|---|--------------|---|--------------|---|--------------|---|--------------|---|--------------|---|--------------|---|--------------|---|--------------|---|
|---------|---|-------|-------------|---|-------------|---|-------------|---|-------------|---|-------------|---|-------------|---|-------------|---|-------------|---|-------------|---|-------------|---|-------------|---|-------------|---|-------------|---|-------------|---|-------------|---|-------------|---|-------------|---|-------------|---|-------------|---|-------------|---|-------------|---|-------------|---|-------------|---|-------------|---|-------------|---|-------------|---|-------------|---|-------------|---|-------------|---|-------------|---|-------------|---|-------------|---|-------------|---|-------------|---|-------------|---|-------------|---|-------------|---|-------------|---|-------------|---|-------------|---|-------------|---|-------------|---|-------------|---|-------------|---|-------------|---|-------------|---|-------------|---|-------------|---|-------------|---|-------------|---|-------------|---|-------------|---|-------------|---|-------------|---|-------------|---|-------------|---|-------------|---|-------------|---|-------------|---|-------------|---|-------------|---|-------------|---|-------------|---|-------------|---|-------------|---|-------------|---|-------------|---|-------------|---|-------------|---|-------------|---|-------------|---|-------------|---|-------------|---|-------------|---|-------------|---|-------------|---|-------------|---|-------------|---|-------------|---|-------------|---|-------------|---|-------------|---|-------------|---|-------------|---|-------------|---|-------------|---|-------------|---|-------------|---|-------------|---|-------------|---|--------------|---|--------------|---|--------------|---|--------------|---|--------------|---|--------------|---|--------------|---|--------------|---|--------------|---|--------------|---|--------------|---|--------------|---|--------------|---|--------------|---|--------------|---|--------------|---|--------------|---|--------------|---|--------------|---|--------------|---|--------------|---|--------------|---|--------------|---|--------------|---|--------------|---|--------------|---|--------------|---|--------------|---|--------------|---|--------------|---|--------------|---|--------------|---|--------------|---|--------------|---|--------------|---|--------------|---|--------------|---|--------------|---|--------------|---|--------------|---|--------------|---|--------------|---|--------------|---|--------------|---|--------------|---|--------------|---|--------------|---|--------------|---|--------------|---|--------------|---|--------------|---|--------------|---|--------------|---|--------------|---|--------------|---|--------------|---|--------------|---|--------------|---|--------------|---|--------------|---|--------------|---|--------------|---|--------------|---|--------------|---|--------------|---|--------------|---|--------------|---|--------------|---|--------------|---|--------------|---|--------------|---|--------------|---|--------------|---|--------------|---|--------------|---|--------------|---|--------------|---|--------------|---|--------------|---|--------------|---|--------------|---|--------------|---|--------------|---|--------------|---|--------------|---|--------------|---|--------------|---|--------------|---|--------------|---|--------------|---|--------------|---|--------------|---|--------------|---|--------------|---|--------------|---|--------------|---|--------------|---|--------------|---|--------------|---|--------------|---|--------------|---|--------------|---|--------------|---|--------------|---|--------------|---|--------------|---|--------------|---|--------------|---|--------------|---|--------------|---|--------------|---|--------------|---|--------------|---|--------------|---|--------------|---|--------------|---|--------------|---|--------------|---|--------------|---|--------------|---|--------------|---|--------------|---|--------------|---|--------------|---|--------------|---|--------------|---|--------------|---|--------------|---|--------------|---|--------------|---|--------------|---|--------------|---|--------------|---|--------------|---|--------------|---|--------------|---|--------------|---|--------------|---|--------------|---|--------------|---|--------------|---|--------------|---|--------------|---|--------------|---|--------------|---|--------------|---|--------------|---|--------------|---|--------------|---|--------------|---|--------------|---|--------------|---|--------------|---|--------------|---|--------------|---|--------------|---|--------------|---|--------------|---|--------------|---|--------------|---|--------------|---|--------------|---|--------------|---|--------------|---|--------------|---|--------------|---|--------------|---|--------------|---|--------------|---|--------------|---|--------------|---|--------------|---|--------------|---|--------------|---|--------------|---|--------------|---|--------------|---|--------------|---|--------------|---|--------------|---|--------------|---|--------------|---|--------------|---|--------------|---|--------------|---|--------------|---|--------------|---|--------------|---|--------------|---|--------------|---|--------------|---|--------------|---|--------------|---|--------------|---|--------------|---|--------------|---|--------------|---|--------------|---|--------------|---|--------------|---|--------------|---|--------------|---|--------------|---|--------------|---|--------------|---|--------------|---|--------------|---|--------------|---|--------------|---|--------------|---|--------------|---|--------------|---|--------------|---|--------------|---|--------------|---|--------------|---|--------------|---|--------------|---|--------------|---|--------------|---|--------------|---|--------------|---|

File: ESM: 10 (Online Resource)

**Title:** Comparative Multidimensional Molecular Analyses of Pediatric Diffuse Intrinsic Glioma Reveals Distinct Molecular Subtypes  
**Journal:** Acta Neuropathologica

**Authors:** Amanda M. Stransik, Madhuri Kumbhakar, Kendall Snyder, Sidicki Yavuz, Joe Devenney, Brennan Harmon, Jordan Hall, Eric H. Rubie, Ping An, Melanie Weingart, Brian Ross, Sarah Magee, Roger J. Packer, Javad Nazarian

**Corresponding Author:**

Javad Nazarian, Children's National Medical Center, Center for Genetic Medicine  
111 Michigan Ave., NW, Washington DC, 20010  
Phone: 202-476-6022 Fax: 202-476-6014  
Email: J.Nazarian@CNMC.org

| p-value |  | FolChang[106] |  | FolChang[110] |  | FolChang[112] |  | FolChang[121] |  | FolChang[137] |  | FolChang[153] |  | FolChang[166] |  | FolChang[170] |  | FolChang[171] |  | FolChang[172] |  | FolChang[173] |  | FolChang[174] |  | FolChang[175] |  | FolChang[176] |  | FolChang[177] |  | FolChang[178] |  | FolChang[179] |  | FolChang[180] |  | FolChang[181] |  | FolChang[182] |  | FolChang[183] |  | FolChang[184] |  | FolChang[185] |  | FolChang[186] |  | FolChang[187] |  | FolChang[188] |  | FolChang[189] |  | FolChang[190] |  | FolChang[191] |  | FolChang[192] |  | FolChang[193] |  | FolChang[194] |  | FolChang[195] |  | FolChang[196] |  | FolChang[197] |  | FolChang[198] |  | FolChang[199] |  | FolChang[200] |  | FolChang[201] |  | FolChang[202] |  | FolChang[203] |  | FolChang[204] |  | FolChang[205] |  | FolChang[206] |  | FolChang[207] |  | FolChang[208] |  | FolChang[209] |  | FolChang[210] |  | FolChang[211] |  | FolChang[212] |  | FolChang[213] |  | FolChang[214] |  | FolChang[215] |  | FolChang[216] |  | FolChang[217] |  | FolChang[218] |  | FolChang[219] |  | FolChang[220] |  | FolChang[221] |  | FolChang[222] |  | FolChang[223] |  | FolChang[224] |  | FolChang[225] |  | FolChang[226] |  | FolChang[227] |  | FolChang[228] |  | FolChang[229] |  | FolChang[230] |  | FolChang[231] |  | FolChang[232] |  | FolChang[233] |  | FolChang[234] |  | FolChang[235] |  | FolChang[236] |  | FolChang[237] |  | FolChang[238] |  | FolChang[239] |  | FolChang[240] |  | FolChang[241] |  | FolChang[242] |  | FolChang[243] |  | FolChang[244] |  | FolChang[245] |  | FolChang[246] |  | FolChang[247] |  | FolChang[248] |  | FolChang[249] |  | FolChang[250] |  | FolChang[251] |  | FolChang[252] |  | FolChang[253] |  | FolChang[254] |  | FolChang[255] |  | FolChang[256] |  | FolChang[257] |  | FolChang[258] |  | FolChang[259] |  | FolChang[260] |  | FolChang[261] |  | FolChang[262] |  | FolChang[263] |  | FolChang[264] |  | FolChang[265] |  | FolChang[266] |  | FolChang[267] |  | FolChang[268] |  | FolChang[269] |  | FolChang[270] |  | FolChang[271] |  | FolChang[272] |  | FolChang[273] |  | FolChang[274] |  | FolChang[275] |  | FolChang[276] |  | FolChang[277] |  | FolChang[278] |  | FolChang[279] |  | FolChang[280] |  | FolChang[281] |  | FolChang[282] |  | FolChang[283] |  | FolChang[284] |  | FolChang[285] |  | FolChang[286] |  | FolChang[287] |  | FolChang[288] |  | FolChang[289] |  | FolChang[290] |  | FolChang[291] |  | FolChang[292] |  | FolChang[293] |  | FolChang[294] |  | FolChang[295] |  | FolChang[296] |  | FolChang[297] |  | FolChang[298] |  | FolChang[299] |  | FolChang[300] |  | FolChang[301] |  | FolChang[302] |  | FolChang[303] |  | FolChang[304] |  | FolChang[305] |  | FolChang[306] |  | FolChang[307] |  | FolChang[308] |  | FolChang[309] |  | FolChang[310] |  | FolChang[311] |  | FolChang[312] |  | FolChang[313] |  | FolChang[314] |  | FolChang[315] |  | FolChang[316] |  | FolChang[317] |  | FolChang[318] |  | FolChang[319] |  | FolChang[320] |  | FolChang[321] |  | FolChang[322] |  | FolChang[323] |  | FolChang[324] |  | FolChang[325] |  | FolChang[326] |  | FolChang[327] |  | FolChang[328] |  | FolChang[329] |  | FolChang[330] |  | FolChang[331] |  | FolChang[332] |  | FolChang[333] |  | FolChang[334] |  | FolChang[335] |  | FolChang[336] |  | FolChang[337] |  | FolChang[338] |  | FolChang[339] |  | FolChang[340] |  | FolChang[341] |  | FolChang[342] |  | FolChang[343] |  | FolChang[344] |  | FolChang[345] |  | FolChang[346] |  | FolChang[347] |  | FolChang[348] |  | FolChang[349] |  | FolChang[350] |  | FolChang[351] |  | FolChang[352] |  | FolChang[353] |  | FolChang[354] |  | FolChang[355] |  | FolChang[356] |  | FolChang[357] |  | FolChang[358] |  | FolChang[359] |  | FolChang[360] |  | FolChang[361] |  | FolChang[362] |  | FolChang[363] |  | FolChang[364] |  | FolChang[365] |  | FolChang[366] |  | FolChang[367] |  | FolChang[368] |  | FolChang[369] |  | FolChang[370] |  | FolChang[371] |  | FolChang[372] |  | FolChang[373] |  | FolChang[374] |  | FolChang[375] |  | FolChang[376] |  | FolChang[377] |  | FolChang[378] |  | FolChang[379] |  | FolChang[380] |  | FolChang[381] |  | FolChang[382] |  | FolChang[383] |  | FolChang[384] |  | FolChang[385] |  | FolChang[386] |  | FolChang[387] |  | FolChang[388] |  | FolChang[389] |  | FolChang[390] |  | FolChang[391] |  | FolChang[392] |  | FolChang[393] |  | FolChang[394] |  | FolChang[395] |  | FolChang[396] |  | FolChang[397] |  | FolChang[398] |  | FolChang[399] |  | FolChang[400] |  | FolChang[401] |  | FolChang[402] |  | FolChang[403] |  | FolChang[404] |  | FolChang[405] |  | FolChang[406] |  | FolChang[407] |  | FolChang[408] |  | FolChang[409] |  | FolChang[410] |  | FolChang[411] |  | FolChang[412] |  | FolChang[413] |  | FolChang[414] |  | FolChang[415] |  | FolChang[416] |  | FolChang[417] |  | FolChang[418] |  | FolChang[419] |  | FolChang[420] |  | FolChang[421] |  | FolChang[422] |  | FolChang[423] |  | FolChang[424] |  | FolChang[425] |  | FolChang[426] |  | FolChang[427] |  | FolChang[428] |  | FolChang[429] |  | FolChang[430] |  | FolChang[431] |  | FolChang[432] |  | FolChang[433] |  | FolChang[434] |  | FolChang[435] |  | FolChang[436] |  | FolChang[437] |  | FolChang[438] |  | FolChang[439] |  | FolChang[440] |  | FolChang[441] |  | FolChang[442] |  | FolChang[443] |  | FolChang[444] |  | FolChang[445] |  | FolChang[446] |  | FolChang[447] |  | FolChang[448] |  | FolChang[449] |  | FolChang[450] |  | FolChang[451] |  | FolChang[452] |  | FolChang[453] |  | FolChang[454] |  | FolChang[455] |  | FolChang[456] |  | FolChang[457] |  | FolChang[458] |  | FolChang[459] |  | FolChang[460] |  | FolChang[461] |  | FolChang[462] |  | FolChang[463] |  | FolChang[464] |  | FolChang[465] |  | FolChang[466] |  | FolChang[467] |  | FolChang[468] |  | FolChang[469] |  | FolChang[470] |  | FolChang[471] |  | FolChang[472] |  | FolChang[473] |  | FolChang[474] |  | FolChang[475] |  | FolChang[476] |  | FolChang[477] |  | FolChang[478] |  | FolChang[479] |  | FolChang[480] |  | FolChang[481] |  | FolChang[482] |  | FolChang[483] |  | FolChang[484] |  | FolChang[485] |  | FolChang[486] |  | FolChang[487] |  | FolChang[488] |  | FolChang[489] |  | FolChang[490] |  | FolChang[491] |  | FolChang[492] |  | FolChang[493] |  | FolChang[494] |  | FolChang[495] |  | FolChang[496] |  | FolChang[497] |  | FolChang[498] |  | FolChang[499] |  | FolChang[500] |  | FolChang[501] |  | FolChang[502] |  | FolChang[503] |  | FolChang[504] |  | FolChang[505] |  | FolChang[506] |  | FolChang[507] |  | FolChang[508] |  | FolChang[509] |  | FolChang[510] |  | FolChang[511] |  | FolChang[512] |  | FolChang[513] |  | FolChang[514] |  | FolChang[515] |  | FolChang[516] |  | FolChang[517] |  | FolChang[518] |  | FolChang[519] |  | FolChang[520] |  | FolChang[521] |  | FolChang[522] |  | FolChang[523] |  | FolChang[524] |  | FolChang[525] |  | FolChang[526] |  | FolChang[527] |  | FolChang[528] |  | FolChang[529] |  | FolChang[530] |  | FolChang[531] |  | FolChang[532] |  | FolChang[533] |  | FolChang[534] |  | FolChang[535] |  | FolChang[536] |  | FolChang[537] |  | FolChang[538] |  | FolChang[539] |  | FolChang[540] |  | FolChang[541] |  | FolChang[542] |  | FolChang[543] |  | FolChang[544] |  | FolChang[545] |  | FolChang[546] |  | FolChang[547] |  | FolChang[548] |  | FolChang[549] |  | FolChang[550] |  | FolChang[551] |  | FolChang[552] |  | FolChang[553] |  | FolChang[554] |  | FolChang[555] |  | FolChang[556] |  | FolChang[557] |  | FolChang[558] |  | FolChang[559] |  | FolChang[560] |  | FolChang[561] |  | FolChang[562] |  | FolChang[563] |  | FolChang[564] |  | FolChang[565] |  | FolChang[566] |  | FolChang[567] |  | FolChang[568] |  | FolChang[569] |  | FolChang[570] |  | FolChang[571] |  | FolChang[572] |  | FolChang[573] |  | FolChang[574] |  | FolChang[575] |  | FolChang[576] |  | FolChang[577] |  | FolChang[578] |  | FolChang[579] |  | FolChang[580] |  | FolChang[581] |  | FolChang[582] |  | FolChang[583] |  | FolChang[584] |  | FolChang[585] |  | FolChang[586] |  | FolChang[587] |  | FolChang[588] |  | FolChang[589] |  | FolChang[590] |  | FolChang[591] |  | FolChang[592] |  | FolChang[593] |  | FolChang[594] |  | FolChang[595] |  | FolChang[596] |  | FolChang[597] |  | FolChang[598] |  | FolChang[599] |  | FolChang[600] |  | FolChang[601] |  | FolChang[602] |  | FolChang[603] |  | FolChang[604] |  | FolChang[605] |  | FolChang[606] |  | FolChang[607] |  | FolChang[608] |  | FolChang[609] |  | FolChang[610] |  | FolChang[611] |  | FolChang[612] |  | FolChang[613] |  | FolChang[614] |  | FolChang[615] |  | FolChang[616] |  | FolChang[617] |  | FolChang[618] |  | FolChang[619] |  | FolChang[620] |  | FolChang[621] |  | FolChang[622] |  | FolChang[623] |  | FolChang[624] |  | FolChang[625] |  | FolChang[626] |  | FolChang[627] |  | FolChang[628] |  | FolChang[629] |  | FolChang[630] |  | FolChang[631] |  | FolChang[632] |  | FolChang[633] |  | FolChang[634] |  | FolChang[635] |  | FolChang[636] |  | FolChang[637] |  | FolChang[638] |  | FolChang[639] |  | FolChang[640] |  | FolChang[641] |  | FolChang[642] |  | FolChang[643] |  | FolChang[644] |  | FolChang[645] |  | FolChang[646] |  | FolChang[647] |  | FolChang[648] |  | FolChang[649] |  | FolChang[650] |  | FolChang[651] |  | FolChang[652] |  | FolChang[653] |  | FolChang[654] |  | FolChang[655] |  | FolChang[656] |  | FolChang[657] |  | FolChang[658] |  | FolChang[659] |  | FolChang[660] |  | FolChang[661] |  | FolChang[662] |  | FolChang[663] |  | FolChang[664] |  | FolChang[665] |  | FolChang[666] |  | FolChang[667] |  | FolChang[668] |  | FolChang[669] |  | FolChang[670] |  | FolChang[671] |  | FolChang[672] |  | FolChang[673] |  | FolChang[674] |  | FolChang[675] |  | FolChang[676] |  | FolChang[677] |  | FolChang[678] |  | FolChang[679] |  | FolChang[680] |  | FolChang[681] |  | FolChang[682] |  | FolChang[683] |  | FolChang[684] |  | FolChang[685] |  | FolChang[686] |  | FolChang[687] |  | FolChang[688] |  | FolChang[689] |  | FolChang[690] |  | FolChang[691] |  | FolChang[692] |  | FolChang[693] |  | FolChang[694] |  | FolChang[695] |  | FolChang[696] |  | FolChang[697] |  | FolChang[698] |  | FolChang[699] |  | FolChang[700] |  | FolChang[701] |  | FolChang[702] |  | FolChang[703] |  | FolChang[704] |  | FolChang[705] |  | FolChang[706] |  | FolChang[707] |  | FolChang[708] |  | FolChang[709] |  | FolChang[710] |  | FolChang[711] |  | FolChang[712] |  | FolChang[713] |  | FolChang[714] |  | FolChang[715] |  | FolChang[716] |  | FolChang[717] |  | FolChang[718] |  | FolChang[719] |  | FolChang[720] |  | FolChang[721] |  | FolChang[722] |  | FolChang[723] |  | FolChang[724] |  | FolChang[725] |  | FolChang[726] |  | FolChang[727] |  | FolChang[728] |  | FolChang[729] |  | FolChang[730] |  | FolChang[731] |  | FolChang[732] |  | FolChang[733] |  | FolChang[734] |  | FolChang[735] |  | FolChang[736] |  | FolChang[737] |  | FolChang[738] |  | FolChang[739] |  | FolChang[740] |  | FolChang[741] |  | FolChang[742] |  | FolChang[743] |  | FolChang[744] |  | FolChang[745] |  | FolChang[746] |  | FolChang[747] |  | FolChang[748] |  | FolChang[749] |  | FolChang[750] |  | FolChang[751] |  | FolChang[752] |  | FolChang[753] |  | FolChang[754] |  | FolChang[755] |  | FolChang[756] |  | FolChang[757] |  | FolChang[758] |  | FolChang[759] |  | FolChang[760] |  | FolChang[761] |  | FolChang[762] |  | FolChang[763] |  | FolChang[764] |  | FolChang[765] |  | FolChang[766] |  | FolChang[767] |  | FolChang[768] |  | FolChang[769] |  | FolChang[770] |  | FolChang[771] |  | FolChang[772] |  | FolChang[773] |  | FolChang[774] |  | FolChang[775] |  | FolChang[776] |  | FolChang[777] |  | FolChang[778] |  | FolChang[779] |  | FolChang[780] |  | FolChang[781] |  | FolChang[782] |  | FolChang[783] |  | FolChang[784] |  | FolChang[785] |  | FolChang[786] |  | FolChang[787] |  | FolChang[788] |  | FolChang[789] |  | FolChang[790] |  | FolChang[791] |  | FolChang[792] |  | FolChang[793] |  | FolChang[794] |  | FolChang[795] |  | FolChang[796] |  | FolChang[797] |  | FolChang[798] |  | FolChang[799] |  | FolChang[800] |  | FolChang[801] |  | FolChang[802] |  | FolChang[803] |  | FolChang[804] |  | FolChang[805] |  | FolChang[806] |  | FolChang[807] |  | FolChang[808] |  | FolChang[809] |  | FolChang[810] |  | FolChang[811] |  | FolChang[812] |  | FolChang[813] |  | FolChang[814] |  | FolChang[815] |  | FolChang[816] |  | FolChang[817] |  | FolChang[818] |  | FolChang[819] |  | FolChang[820] |  | FolChang[821] |  | FolChang[822] |  | FolChang[823] |  | FolChang[824] |  | FolChang[825] |  | FolChang[826] |  | FolChang[827] |  | FolChang[828] |  | FolChang[829] |  | FolChang[830] |  | FolChang[831] |  | FolChang[832] |  | FolChang[833] |  | FolChang[834] |  | FolChang[835] |  | FolChang[836] |  | FolChang[837] |  | FolChang[838] |  | FolChang[839] |  | FolChang[840] |  | FolChang[841] |  | FolChang[842] |  | FolChang[843] |  | FolChang[844] |  | FolChang[845] |  | FolChang[846] |  | FolChang[847] |  | FolChang[848] |  | FolChang[849] |  | FolChang[850] |  | FolChang[851] |  | FolChang[852] |  | FolChang[853] |  | FolChang[854] |  | FolChang[855] |  | FolChang[856] |  | FolChang[857] |  | FolChang[858] |  | FolChang[859] |  | FolChang[860] |  | FolChang[861] |  | FolChang[862] |  | FolChang[863] |  | FolChang[864] |  | FolChang[865] |  | FolChang[866] |  | FolChang[867] |  | FolChang[868] |  | FolChang[869] |  | FolChang[870] |  | FolChang[871] |  | FolChang[872] |  | FolChang[873] |  | FolChang[874] |  | FolChang[875] |  | FolChang[876] |  | FolChang[877] |  | FolChang[878] |  | FolChang[879] |  | FolChang[880] |  | FolChang[881] |  | FolChang[882] |  | FolChang[883] |  | FolChang[884] |  | FolChang[885] |  | FolChang[886] |  | FolChang[887] |  | FolChang[888] |  | FolChang[889] |  | FolChang[890] |  | FolChang[891] |  | FolChang[892] |  | FolChang[893] |  | FolChang[894] |  | FolChang[895] |  | FolChang[896] |  | FolChang[897] |  | FolChang[898] |  | FolChang[899] |  | FolChang[900] |  | FolChang[901] |  | FolChang[902] |  | FolChang[903] |  | FolChang[904] |  | FolChang[905] |  | FolChang[906] |  | FolChang[907] |  | FolChang[908] |  | FolChang[909] |  | FolChang[910] |  | FolChang[911] |  | FolChang[912] |  | FolChang[913] |  | FolChang[914] |  | FolChang[915] |  | FolChang[916] |  | FolChang[917] |  | FolChang[918] |  | FolChang[919] |  | FolChang[920] |  | FolChang[921] |  | FolChang[922] |  | FolChang[923] |  | FolChang[924] |  | FolChang[925] |  | FolChang[926] |  | FolChang[927] |  | FolChang[928] |  | FolChang[929] |  | FolChang[930] |  | FolChang[931] |  | FolChang[932] |  | FolChang[933] |  | FolChang[934] |  | FolChang[935] |  |
|---------|--|---------------|--|---------------|--|---------------|--|---------------|--|---------------|--|---------------|--|---------------|--|---------------|--|---------------|--|---------------|--|---------------|--|---------------|--|---------------|--|---------------|--|---------------|--|---------------|--|---------------|--|---------------|--|---------------|--|---------------|--|---------------|--|---------------|--|---------------|--|---------------|--|---------------|--|---------------|--|---------------|--|---------------|--|---------------|--|---------------|--|---------------|--|---------------|--|---------------|--|---------------|--|---------------|--|---------------|--|---------------|--|---------------|--|---------------|--|---------------|--|---------------|--|---------------|--|---------------|--|---------------|--|---------------|--|---------------|--|---------------|--|---------------|--|---------------|--|---------------|--|---------------|--|---------------|--|---------------|--|---------------|--|---------------|--|---------------|--|---------------|--|---------------|--|---------------|--|---------------|--|---------------|--|---------------|--|---------------|--|---------------|--|---------------|--|---------------|--|---------------|--|---------------|--|---------------|--|---------------|--|---------------|--|---------------|--|---------------|--|---------------|--|---------------|--|---------------|--|---------------|--|---------------|--|---------------|--|---------------|--|---------------|--|---------------|--|---------------|--|---------------|--|---------------|--|---------------|--|---------------|--|---------------|--|---------------|--|---------------|--|---------------|--|---------------|--|---------------|--|---------------|--|---------------|--|---------------|--|---------------|--|---------------|--|---------------|--|---------------|--|---------------|--|---------------|--|---------------|--|---------------|--|---------------|--|---------------|--|---------------|--|---------------|--|---------------|--|---------------|--|---------------|--|---------------|--|---------------|--|---------------|--|---------------|--|---------------|--|---------------|--|---------------|--|---------------|--|---------------|--|---------------|--|---------------|--|---------------|--|---------------|--|---------------|--|---------------|--|---------------|--|---------------|--|---------------|--|---------------|--|---------------|--|---------------|--|---------------|--|---------------|--|---------------|--|---------------|--|---------------|--|---------------|--|---------------|--|---------------|--|---------------|--|---------------|--|---------------|--|---------------|--|---------------|--|---------------|--|---------------|--|---------------|--|---------------|--|---------------|--|---------------|--|---------------|--|---------------|--|---------------|--|---------------|--|---------------|--|---------------|--|---------------|--|---------------|--|---------------|--|---------------|--|---------------|--|---------------|--|---------------|--|---------------|--|---------------|--|---------------|--|---------------|--|---------------|--|---------------|--|---------------|--|---------------|--|---------------|--|---------------|--|---------------|--|---------------|--|---------------|--|---------------|--|---------------|--|---------------|--|---------------|--|---------------|--|---------------|--|---------------|--|---------------|--|---------------|--|---------------|--|---------------|--|---------------|--|---------------|--|---------------|--|---------------|--|---------------|--|---------------|--|---------------|--|---------------|--|---------------|--|---------------|--|---------------|--|---------------|--|---------------|--|---------------|--|---------------|--|---------------|--|---------------|--|---------------|--|---------------|--|---------------|--|---------------|--|---------------|--|---------------|--|---------------|--|---------------|--|---------------|--|---------------|--|---------------|--|---------------|--|---------------|--|---------------|--|---------------|--|---------------|--|---------------|--|---------------|--|---------------|--|---------------|--|---------------|--|---------------|--|---------------|--|---------------|--|---------------|--|---------------|--|---------------|--|---------------|--|---------------|--|---------------|--|---------------|--|---------------|--|---------------|--|---------------|--|---------------|--|---------------|--|---------------|--|---------------|--|---------------|--|---------------|--|---------------|--|---------------|--|---------------|--|---------------|--|---------------|--|---------------|--|---------------|--|---------------|--|---------------|--|---------------|--|---------------|--|---------------|--|---------------|--|---------------|--|---------------|--|---------------|--|---------------|--|---------------|--|---------------|--|---------------|--|---------------|--|---------------|--|---------------|--|---------------|--|---------------|--|---------------|--|---------------|--|---------------|--|---------------|--|---------------|--|---------------|--|---------------|--|---------------|--|---------------|--|---------------|--|---------------|--|---------------|--|---------------|--|---------------|--|---------------|--|---------------|--|---------------|--|---------------|--|---------------|--|---------------|--|---------------|--|---------------|--|---------------|--|---------------|--|---------------|--|---------------|--|---------------|--|---------------|--|---------------|--|---------------|--|---------------|--|---------------|--|---------------|--|---------------|--|---------------|--|---------------|--|---------------|--|---------------|--|---------------|--|---------------|--|---------------|--|---------------|--|---------------|--|---------------|--|---------------|--|---------------|--|---------------|--|---------------|--|---------------|--|---------------|--|---------------|--|---------------|--|---------------|--|---------------|--|---------------|--|---------------|--|---------------|--|---------------|--|---------------|--|---------------|--|---------------|--|---------------|--|---------------|--|---------------|--|---------------|--|---------------|--|---------------|--|---------------|--|---------------|--|---------------|--|---------------|--|---------------|--|---------------|--|---------------|--|---------------|--|---------------|--|---------------|--|---------------|--|---------------|--|---------------|--|---------------|--|---------------|--|---------------|--|---------------|--|---------------|--|---------------|--|---------------|--|---------------|--|---------------|--|---------------|--|---------------|--|---------------|--|---------------|--|---------------|--|---------------|--|---------------|--|---------------|--|---------------|--|---------------|--|---------------|--|---------------|--|---------------|--|---------------|--|---------------|--|---------------|--|---------------|--|---------------|--|---------------|--|---------------|--|---------------|--|---------------|--|---------------|--|---------------|--|---------------|--|---------------|--|---------------|--|---------------|--|---------------|--|---------------|--|---------------|--|---------------|--|---------------|--|---------------|--|---------------|--|---------------|--|---------------|--|---------------|--|---------------|--|---------------|--|---------------|--|---------------|--|---------------|--|---------------|--|---------------|--|---------------|--|---------------|--|---------------|--|---------------|--|---------------|--|---------------|--|---------------|--|---------------|--|---------------|--|---------------|--|---------------|--|---------------|--|---------------|--|---------------|--|---------------|--|---------------|--|---------------|--|---------------|--|---------------|--|---------------|--|---------------|--|---------------|--|---------------|--|---------------|--|---------------|--|---------------|--|---------------|--|---------------|--|---------------|--|---------------|--|---------------|--|---------------|--|---------------|--|---------------|--|---------------|--|---------------|--|---------------|--|---------------|--|---------------|--|---------------|--|---------------|--|---------------|--|---------------|--|---------------|--|---------------|--|---------------|--|---------------|--|---------------|--|---------------|--|---------------|--|---------------|--|---------------|--|---------------|--|---------------|--|---------------|--|---------------|--|---------------|--|---------------|--|---------------|--|---------------|--|---------------|--|---------------|--|---------------|--|---------------|--|---------------|--|---------------|--|---------------|--|---------------|--|---------------|--|---------------|--|---------------|--|---------------|--|---------------|--|---------------|--|---------------|--|---------------|--|---------------|--|---------------|--|---------------|--|---------------|--|---------------|--|---------------|--|---------------|--|---------------|--|---------------|--|---------------|--|---------------|--|---------------|--|---------------|--|---------------|--|---------------|--|---------------|--|---------------|--|---------------|--|---------------|--|---------------|--|---------------|--|---------------|--|---------------|--|---------------|--|---------------|--|---------------|--|---------------|--|---------------|--|---------------|--|---------------|--|---------------|--|---------------|--|---------------|--|---------------|--|---------------|--|---------------|--|---------------|--|---------------|--|---------------|--|---------------|--|---------------|--|---------------|--|---------------|--|---------------|--|---------------|--|---------------|--|---------------|--|---------------|--|---------------|--|---------------|--|---------------|--|---------------|--|---------------|--|---------------|--|---------------|--|---------------|--|---------------|--|---------------|--|---------------|--|---------------|--|---------------|--|---------------|--|---------------|--|---------------|--|---------------|--|---------------|--|---------------|--|---------------|--|---------------|--|---------------|--|---------------|--|---------------|--|---------------|--|---------------|--|---------------|--|---------------|--|---------------|--|---------------|--|---------------|--|---------------|--|---------------|--|---------------|--|---------------|--|---------------|--|---------------|--|---------------|--|---------------|--|---------------|--|---------------|--|---------------|--|---------------|--|---------------|--|---------------|--|---------------|--|---------------|--|---------------|--|---------------|--|---------------|--|---------------|--|---------------|--|---------------|--|---------------|--|---------------|--|---------------|--|---------------|--|---------------|--|---------------|--|---------------|--|---------------|--|---------------|--|---------------|--|---------------|--|---------------|--|---------------|--|---------------|--|---------------|--|---------------|--|---------------|--|---------------|--|---------------|--|---------------|--|---------------|--|---------------|--|---------------|--|---------------|--|---------------|--|---------------|--|---------------|--|---------------|--|---------------|--|---------------|--|---------------|--|---------------|--|---------------|--|---------------|--|---------------|--|---------------|--|---------------|--|---------------|--|---------------|--|---------------|--|---------------|--|---------------|--|---------------|--|---------------|--|---------------|--|---------------|--|---------------|--|---------------|--|---------------|--|---------------|--|---------------|--|---------------|--|---------------|--|---------------|--|---------------|--|---------------|--|---------------|--|---------------|--|---------------|--|---------------|--|---------------|--|---------------|--|---------------|--|---------------|--|---------------|--|---------------|--|---------------|--|---------------|--|---------------|--|---------------|--|---------------|--|---------------|--|---------------|--|---------------|--|---------------|--|---------------|--|---------------|--|---------------|--|---------------|--|---------------|--|---------------|--|---------------|--|---------------|--|---------------|--|---------------|--|---------------|--|---------------|--|---------------|--|---------------|--|---------------|--|---------------|--|---------------|--|---------------|--|---------------|--|---------------|--|---------------|--|---------------|--|---------------|--|---------------|--|---------------|--|---------------|--|---------------|--|---------------|--|---------------|--|---------------|--|---------------|--|---------------|--|---------------|--|---------------|--|---------------|--|---------------|--|---------------|--|---------------|--|---------------|--|---------------|--|---------------|--|---------------|--|---------------|--|---------------|--|---------------|--|---------------|--|---------------|--|---------------|--|---------------|--|---------------|--|---------------|--|---------------|--|---------------|--|---------------|--|---------------|--|---------------|--|---------------|--|---------------|--|---------------|--|---------------|--|---------------|--|---------------|--|---------------|--|---------------|--|---------------|--|---------------|--|---------------|--|---------------|--|---------------|--|---------------|--|---------------|--|---------------|--|---------------|--|---------------|--|---------------|--|---------------|--|---------------|--|---------------|--|---------------|--|---------------|--|---------------|--|---------------|--|---------------|--|---------------|--|---------------|--|---------------|--|---------------|--|---------------|--|---------------|--|---------------|--|---------------|--|---------------|--|---------------|--|---------------|--|---------------|--|---------------|--|---------------|--|---------------|--|---------------|--|---------------|--|---------------|--|---------------|--|---------------|--|---------------|--|---------------|--|---------------|--|---------------|--|---------------|--|---------------|--|---------------|--|---------------|--|---------------|--|---------------|--|---------------|--|---------------|--|---------------|--|---------------|--|
|---------|--|---------------|--|---------------|--|---------------|--|---------------|--|---------------|--|---------------|--|---------------|--|---------------|--|---------------|--|---------------|--|---------------|--|---------------|--|---------------|--|---------------|--|---------------|--|---------------|--|---------------|--|---------------|--|---------------|--|---------------|--|---------------|--|---------------|--|---------------|--|---------------|--|---------------|--|---------------|--|---------------|--|---------------|--|---------------|--|---------------|--|---------------|--|---------------|--|---------------|--|---------------|--|---------------|--|---------------|--|---------------|--|---------------|--|---------------|--|---------------|--|---------------|--|---------------|--|---------------|--|---------------|--|---------------|--|---------------|--|---------------|--|---------------|--|---------------|--|---------------|--|---------------|--|---------------|--|---------------|--|---------------|--|---------------|--|---------------|--|---------------|--|---------------|--|---------------|--|---------------|--|---------------|--|---------------|--|---------------|--|---------------|--|---------------|--|---------------|--|---------------|--|---------------|--|---------------|--|---------------|--|---------------|--|---------------|--|---------------|--|---------------|--|---------------|--|---------------|--|---------------|--|---------------|--|---------------|--|---------------|--|---------------|--|---------------|--|---------------|--|---------------|--|---------------|--|---------------|--|---------------|--|---------------|--|---------------|--|---------------|--|---------------|--|---------------|--|---------------|--|---------------|--|---------------|--|---------------|--|---------------|--|---------------|--|---------------|--|---------------|--|---------------|--|---------------|--|---------------|--|---------------|--|---------------|--|---------------|--|---------------|--|---------------|--|---------------|--|---------------|--|---------------|--|---------------|--|---------------|--|---------------|--|---------------|--|---------------|--|---------------|--|---------------|--|---------------|--|---------------|--|---------------|--|---------------|--|---------------|--|---------------|--|---------------|--|---------------|--|---------------|--|---------------|--|---------------|--|---------------|--|---------------|--|---------------|--|---------------|--|---------------|--|---------------|--|---------------|--|---------------|--|---------------|--|---------------|--|---------------|--|---------------|--|---------------|--|---------------|--|---------------|--|---------------|--|---------------|--|---------------|--|---------------|--|---------------|--|---------------|--|---------------|--|---------------|--|---------------|--|---------------|--|---------------|--|---------------|--|---------------|--|---------------|--|---------------|--|---------------|--|---------------|--|---------------|--|---------------|--|---------------|--|---------------|--|---------------|--|---------------|--|---------------|--|---------------|--|---------------|--|---------------|--|---------------|--|---------------|--|---------------|--|---------------|--|---------------|--|---------------|--|---------------|--|---------------|--|---------------|--|---------------|--|---------------|--|---------------|--|---------------|--|---------------|--|---------------|--|---------------|--|---------------|--|---------------|--|---------------|--|---------------|--|---------------|--|---------------|--|---------------|--|---------------|--|---------------|--|---------------|--|---------------|--|---------------|--|---------------|--|---------------|--|---------------|--|---------------|--|---------------|--|---------------|--|---------------|--|---------------|--|---------------|--|---------------|--|---------------|--|---------------|--|---------------|--|---------------|--|---------------|--|---------------|--|---------------|--|---------------|--|---------------|--|---------------|--|---------------|--|---------------|--|---------------|--|---------------|--|---------------|--|---------------|--|---------------|--|---------------|--|---------------|--|---------------|--|---------------|--|---------------|--|---------------|--|---------------|--|---------------|--|---------------|--|---------------|--|---------------|--|---------------|--|---------------|--|---------------|--|---------------|--|---------------|--|---------------|--|---------------|--|---------------|--|---------------|--|---------------|--|---------------|--|---------------|--|---------------|--|---------------|--|---------------|--|---------------|--|---------------|--|---------------|--|---------------|--|---------------|--|---------------|--|---------------|--|---------------|--|---------------|--|---------------|--|---------------|--|---------------|--|---------------|--|---------------|--|---------------|--|---------------|--|---------------|--|---------------|--|---------------|--|---------------|--|---------------|--|---------------|--|---------------|--|---------------|--|---------------|--|---------------|--|---------------|--|---------------|--|---------------|--|---------------|--|---------------|--|---------------|--|---------------|--|---------------|--|---------------|--|---------------|--|---------------|--|---------------|--|---------------|--|---------------|--|---------------|--|---------------|--|---------------|--|---------------|--|---------------|--|---------------|--|---------------|--|---------------|--|---------------|--|---------------|--|---------------|--|---------------|--|---------------|--|---------------|--|---------------|--|---------------|--|---------------|--|---------------|--|---------------|--|---------------|--|---------------|--|---------------|--|---------------|--|---------------|--|---------------|--|---------------|--|---------------|--|---------------|--|---------------|--|---------------|--|---------------|--|---------------|--|---------------|--|---------------|--|---------------|--|---------------|--|---------------|--|---------------|--|---------------|--|---------------|--|---------------|--|---------------|--|---------------|--|---------------|--|---------------|--|---------------|--|---------------|--|---------------|--|---------------|--|---------------|--|---------------|--|---------------|--|---------------|--|---------------|--|---------------|--|---------------|--|---------------|--|---------------|--|---------------|--|---------------|--|---------------|--|---------------|--|---------------|--|---------------|--|---------------|--|---------------|--|---------------|--|---------------|--|---------------|--|---------------|--|---------------|--|---------------|--|---------------|--|---------------|--|---------------|--|---------------|--|---------------|--|---------------|--|---------------|--|---------------|--|---------------|--|---------------|--|---------------|--|---------------|--|---------------|--|---------------|--|---------------|--|---------------|--|---------------|--|---------------|--|---------------|--|---------------|--|---------------|--|---------------|--|---------------|--|---------------|--|---------------|--|---------------|--|---------------|--|---------------|--|---------------|--|---------------|--|---------------|--|---------------|--|---------------|--|---------------|--|---------------|--|---------------|--|---------------|--|---------------|--|---------------|--|---------------|--|---------------|--|---------------|--|---------------|--|---------------|--|---------------|--|---------------|--|---------------|--|---------------|--|---------------|--|---------------|--|---------------|--|---------------|--|---------------|--|---------------|--|---------------|--|---------------|--|---------------|--|---------------|--|---------------|--|---------------|--|---------------|--|---------------|--|---------------|--|---------------|--|---------------|--|---------------|--|---------------|--|---------------|--|---------------|--|---------------|--|---------------|--|---------------|--|---------------|--|---------------|--|---------------|--|---------------|--|---------------|--|---------------|--|---------------|--|---------------|--|---------------|--|---------------|--|---------------|--|---------------|--|---------------|--|---------------|--|---------------|--|---------------|--|---------------|--|---------------|--|---------------|--|---------------|--|---------------|--|---------------|--|---------------|--|---------------|--|---------------|--|---------------|--|---------------|--|---------------|--|---------------|--|---------------|--|---------------|--|---------------|--|---------------|--|---------------|--|---------------|--|---------------|--|---------------|--|---------------|--|---------------|--|---------------|--|---------------|--|---------------|--|---------------|--|---------------|--|---------------|--|---------------|--|---------------|--|---------------|--|---------------|--|---------------|--|---------------|--|---------------|--|---------------|--|---------------|--|---------------|--|---------------|--|---------------|--|---------------|--|---------------|--|---------------|--|---------------|--|---------------|--|---------------|--|---------------|--|---------------|--|---------------|--|---------------|--|---------------|--|---------------|--|---------------|--|---------------|--|---------------|--|---------------|--|---------------|--|---------------|--|---------------|--|---------------|--|---------------|--|---------------|--|---------------|--|---------------|--|---------------|--|---------------|--|---------------|--|---------------|--|---------------|--|---------------|--|---------------|--|---------------|--|---------------|--|---------------|--|---------------|--|---------------|--|---------------|--|---------------|--|---------------|--|---------------|--|---------------|--|---------------|--|---------------|--|---------------|--|---------------|--|---------------|--|---------------|--|---------------|--|---------------|--|---------------|--|---------------|--|---------------|--|---------------|--|---------------|--|---------------|--|---------------|--|---------------|--|---------------|--|---------------|--|---------------|--|---------------|--|---------------|--|---------------|--|---------------|--|---------------|--|---------------|--|---------------|--|---------------|--|---------------|--|---------------|--|---------------|--|---------------|--|---------------|--|---------------|--|---------------|--|---------------|--|---------------|--|---------------|--|---------------|--|---------------|--|---------------|--|---------------|--|---------------|--|---------------|--|---------------|--|---------------|--|---------------|--|---------------|--|---------------|--|---------------|--|---------------|--|---------------|--|---------------|--|---------------|--|---------------|--|---------------|--|---------------|--|---------------|--|---------------|--|---------------|--|---------------|--|---------------|--|---------------|--|---------------|--|---------------|--|---------------|--|---------------|--|---------------|--|---------------|--|---------------|--|---------------|--|---------------|--|---------------|--|---------------|--|---------------|--|---------------|--|---------------|--|---------------|--|---------------|--|---------------|--|---------------|--|---------------|--|---------------|--|---------------|--|---------------|--|---------------|--|---------------|--|---------------|--|---------------|--|---------------|--|---------------|--|---------------|--|---------------|--|---------------|--|---------------|--|---------------|--|---------------|--|---------------|--|---------------|--|---------------|--|---------------|--|---------------|--|---------------|--|---------------|--|---------------|--|---------------|--|---------------|--|---------------|--|---------------|--|---------------|--|---------------|--|---------------|--|---------------|--|---------------|--|---------------|--|---------------|--|---------------|--|---------------|--|---------------|--|---------------|--|---------------|--|---------------|--|---------------|--|---------------|--|---------------|--|---------------|--|---------------|--|---------------|--|---------------|--|---------------|--|---------------|--|---------------|--|---------------|--|---------------|--|---------------|--|---------------|--|---------------|--|---------------|--|---------------|--|---------------|--|---------------|--|---------------|--|---------------|--|---------------|--|---------------|--|---------------|--|---------------|--|---------------|--|---------------|--|---------------|--|---------------|--|---------------|--|---------------|--|---------------|--|---------------|--|---------------|--|---------------|--|---------------|--|---------------|--|---------------|--|---------------|--|---------------|--|---------------|--|---------------|--|---------------|--|---------------|--|---------------|--|---------------|--|---------------|--|---------------|--|---------------|--|---------------|--|---------------|--|---------------|--|---------------|--|---------------|--|---------------|--|---------------|--|---------------|--|---------------|--|---------------|--|---------------|--|---------------|--|---------------|--|---------------|--|---------------|--|---------------|--|---------------|--|---------------|--|---------------|--|---------------|--|---------------|--|---------------|--|---------------|--|---------------|--|---------------|--|---------------|--|---------------|--|---------------|--|---------------|--|---------------|--|---------------|--|---------------|--|---------------|--|---------------|--|---------------|--|---------------|--|---------------|--|---------------|--|---------------|--|---------------|--|---------------|--|---------------|--|---------------|--|---------------|--|---------------|--|---------------|--|---------------|--|---------------|--|---------------|--|---------------|--|---------------|--|---------------|--|---------------|--|---------------|--|---------------|--|---------------|--|---------------|--|---------------|--|---------------|--|---------------|--|---------------|--|---------------|--|---------------|--|---------------|--|---------------|--|---------------|--|---------------|--|---------------|--|---------------|--|

File: ISM\_10 (Online Resource 10)

Title: Comparative Multidimensional Molecular Analyses of Pediatric Diffuse Intrinsic Gliomas Reveals Distinct Molecular Subtypes  
Journal: Acta Neuropathologica

Authors: Amanda M. Stransik, Madhuri Kumbhakar, Kendall Snyder, Sidicki Yavuzli, Joe Devenney, Brennan Harmon, Jordan Hall, Eric H. Ruben, Ping An, Melanie Weingart, Brian Reid, Sarah Magee, Roger J. Packer, Javad Nazarian

Corresponding Author:

Javad Nazarian, Children's National Medical Center, Center for Genetic Medicine  
111 Michigan Ave., NW, Washington DC, 20010  
Phone: 202-476-6022 Fax: 202-476-6014  
Email: J.Nazarian@CNM.org

| Gene ID | p-value | FolChang106 |  | p-value | FolChang110 |  | p-value | FolChang111 |  | p-value | FolChang112 |  | p-value | FolChang121 |  | p-value | FolChang137 |  | p-value | FolChang143 |  | p-value | FolChang153 |  | p-value | FolChang157 |  | p-value | FolChang165 |  | p-value | FolChang176 |  | p-value | FolChang186 |  | p-value | FolChang197 |  | p-value | FolChang206 |  | p-value | FolChang216 |  | p-value | FolChang226 |  | p-value | FolChang236 |  | p-value | FolChang246 |  | p-value | FolChang256 |  | p-value | FolChang266 |  | p-value | FolChang276 |  | p-value | FolChang286 |  | p-value | FolChang296 |  | p-value | FolChang306 |  | p-value | FolChang316 |  | p-value | FolChang326 |  | p-value | FolChang336 |  | p-value | FolChang346 |  | p-value | FolChang356 |  | p-value | FolChang366 |  | p-value | FolChang376 |  | p-value | FolChang386 |  | p-value | FolChang396 |  | p-value | FolChang406 |  | p-value | FolChang416 |  | p-value | FolChang426 |  | p-value | FolChang436 |  | p-value | FolChang446 |  | p-value | FolChang456 |  | p-value | FolChang466 |  | p-value | FolChang476 |  | p-value | FolChang486 |  | p-value | FolChang496 |  | p-value | FolChang506 |  | p-value | FolChang516 |  | p-value | FolChang526 |  | p-value | FolChang536 |  | p-value | FolChang546 |  | p-value | FolChang556 |  | p-value | FolChang566 |  | p-value | FolChang576 |  | p-value | FolChang586 |  | p-value | FolChang596 |  | p-value | FolChang606 |  | p-value | FolChang616 |  | p-value | FolChang626 |  | p-value | FolChang636 |  | p-value | FolChang646 |  | p-value | FolChang656 |  | p-value | FolChang666 |  | p-value | FolChang676 |  | p-value | FolChang686 |  | p-value | FolChang696 |  | p-value | FolChang706 |  | p-value | FolChang716 |  | p-value | FolChang726 |  | p-value | FolChang736 |  | p-value | FolChang746 |  | p-value | FolChang756 |  | p-value | FolChang766 |  | p-value | FolChang776 |  | p-value | FolChang786 |  | p-value | FolChang796 |  | p-value | FolChang806 |  | p-value | FolChang816 |  | p-value | FolChang826 |  | p-value | FolChang836 |  | p-value | FolChang846 |  | p-value | FolChang856 |  | p-value | FolChang866 |  | p-value | FolChang876 |  | p-value | FolChang886 |  | p-value | FolChang896 |  | p-value | FolChang906 |  | p-value | FolChang916 |  | p-value | FolChang926 |  | p-value | FolChang936 |  | p-value | FolChang946 |  | p-value | FolChang956 |  | p-value | FolChang966 |  | p-value | FolChang976 |  | p-value | FolChang986 |  | p-value | FolChang996 |  | p-value | FolChang1006 |  | p-value | FolChang1016 |  | p-value | FolChang1026 |  | p-value | FolChang1036 |  | p-value | FolChang1046 |  | p-value | FolChang1056 |  | p-value | FolChang1066 |  | p-value | FolChang1076 |  | p-value | FolChang1086 |  | p-value | FolChang1096 |  | p-value | FolChang1106 |  | p-value | FolChang1116 |  | p-value | FolChang1126 |  | p-value | FolChang1136 |  | p-value | FolChang1146 |  | p-value | FolChang1156 |  | p-value | FolChang1166 |  | p-value | FolChang1176 |  | p-value | FolChang1186 |  | p-value | FolChang1196 |  | p-value | FolChang1206 |  | p-value | FolChang1216 |  | p-value | FolChang1226 |  | p-value | FolChang1236 |  | p-value | FolChang1246 |  | p-value | FolChang1256 |  | p-value | FolChang1266 |  | p-value | FolChang1276 |  | p-value | FolChang1286 |  | p-value | FolChang1296 |  | p-value | FolChang1306 |  | p-value | FolChang1316 |  | p-value | FolChang1326 |  | p-value | FolChang1336 |  | p-value | FolChang1346 |  | p-value | FolChang1356 |  | p-value | FolChang1366 |  | p-value | FolChang1376 |  | p-value | FolChang1386 |  | p-value | FolChang1396 |  | p-value | FolChang1406 |  | p-value | FolChang1416 |  | p-value | FolChang1426 |  | p-value | FolChang1436 |  | p-value | FolChang1446 |  | p-value | FolChang1456 |  | p-value | FolChang1466 |  | p-value | FolChang1476 |  | p-value | FolChang1486 |  | p-value | FolChang1496 |  | p-value | FolChang1506 |  | p-value | FolChang1516 |  | p-value | FolChang1526 |  | p-value | FolChang1536 |  | p-value | FolChang1546 |  | p-value | FolChang1556 |  | p-value | FolChang1566 |  | p-value | FolChang1576 |  | p-value | FolChang1586 |  | p-value | FolChang1596 |  | p-value | FolChang1606 |  | p-value | FolChang1616 |  | p-value | FolChang1626 |  | p-value | FolChang1636 |  | p-value | FolChang1646 |  | p-value | FolChang1656 |  | p-value | FolChang1666 |  | p-value | FolChang1676 |  | p-value | FolChang1686 |  | p-value | FolChang1696 |  | p-value | FolChang1706 |  | p-value | FolChang1716 |  | p-value | FolChang1726 |  | p-value | FolChang1736 |  | p-value | FolChang1746 |  | p-value | FolChang1756 |  | p-value | FolChang1766 |  | p-value | FolChang1776 |  | p-value | FolChang1786 |  | p-value | FolChang1796 |  | p-value | FolChang1806 |  | p-value | FolChang1816 |  | p-value | FolChang1826 |  | p-value | FolChang1836 |  | p-value | FolChang1846 |  | p-value | FolChang1856 |  | p-value | FolChang1866 |  | p-value | FolChang1876 |  | p-value | FolChang1886 |  | p-value | FolChang1896 |  | p-value | FolChang1906 |  | p-value | FolChang1916 |  | p-value | FolChang1926 |  | p-value | FolChang1936 |  | p-value | FolChang1946 |  | p-value | FolChang1956 |  | p-value | FolChang1966 |  | p-value | FolChang1976 |  | p-value | FolChang1986 |  | p-value | FolChang1996 |  | p-value | FolChang2006 |  | p-value | FolChang2016 |  | p-value | FolChang2026 |  | p-value | FolChang2036 |  | p-value | FolChang2046 |  | p-value | FolChang2056 |  | p-value | FolChang2066 |  | p-value | FolChang2076 |  | p-value | FolChang2086 |  | p-value | FolChang2096 |  | p-value | FolChang2106 |  | p-value | FolChang2116 |  | p-value | FolChang2126 |  | p-value | FolChang2136 |  | p-value | FolChang2146 |  | p-value | FolChang2156 |  | p-value | FolChang2166 |  | p-value | FolChang2176 |  | p-value | FolChang2186 |  | p-value | FolChang2196 |  | p-value | FolChang2206 |  | p-value | FolChang2216 |  | p-value | FolChang2226 |  | p-value | FolChang2236 |  | p-value | FolChang2246 |  | p-value | FolChang2256 |  | p-value | FolChang2266 |  | p-value | FolChang2276 |  | p-value | FolChang2286 |  | p-value | FolChang2296 |  | p-value | FolChang2306 |  | p-value | FolChang2316 |  | p-value | FolChang2326 |  | p-value | FolChang2336 |  | p-value | FolChang2346 |  | p-value | FolChang2356 |  | p-value | FolChang2366 |  | p-value | FolChang2376 |  | p-value | FolChang2386 |  | p-value | FolChang2396 |  | p-value | FolChang2406 |  | p-value | FolChang2416 |  | p-value | FolChang2426 |  | p-value | FolChang2436 |  | p-value | FolChang2446 |  | p-value | FolChang2456 |  | p-value | FolChang2466 |  | p-value | FolChang2476 |  | p-value | FolChang2486 |  | p-value | FolChang2496 |  | p-value | FolChang2506 |  | p-value | FolChang2516 |  | p-value | FolChang2526 |  | p-value | FolChang2536 |  | p-value | FolChang2546 |  | p-value | FolChang2556 |  | p-value | FolChang2566 |  | p-value | FolChang2576 |  | p-value | F |
|---------|---------|-------------|--|---------|-------------|--|---------|-------------|--|---------|-------------|--|---------|-------------|--|---------|-------------|--|---------|-------------|--|---------|-------------|--|---------|-------------|--|---------|-------------|--|---------|-------------|--|---------|-------------|--|---------|-------------|--|---------|-------------|--|---------|-------------|--|---------|-------------|--|---------|-------------|--|---------|-------------|--|---------|-------------|--|---------|-------------|--|---------|-------------|--|---------|-------------|--|---------|-------------|--|---------|-------------|--|---------|-------------|--|---------|-------------|--|---------|-------------|--|---------|-------------|--|---------|-------------|--|---------|-------------|--|---------|-------------|--|---------|-------------|--|---------|-------------|--|---------|-------------|--|---------|-------------|--|---------|-------------|--|---------|-------------|--|---------|-------------|--|---------|-------------|--|---------|-------------|--|---------|-------------|--|---------|-------------|--|---------|-------------|--|---------|-------------|--|---------|-------------|--|---------|-------------|--|---------|-------------|--|---------|-------------|--|---------|-------------|--|---------|-------------|--|---------|-------------|--|---------|-------------|--|---------|-------------|--|---------|-------------|--|---------|-------------|--|---------|-------------|--|---------|-------------|--|---------|-------------|--|---------|-------------|--|---------|-------------|--|---------|-------------|--|---------|-------------|--|---------|-------------|--|---------|-------------|--|---------|-------------|--|---------|-------------|--|---------|-------------|--|---------|-------------|--|---------|-------------|--|---------|-------------|--|---------|-------------|--|---------|-------------|--|---------|-------------|--|---------|-------------|--|---------|-------------|--|---------|-------------|--|---------|-------------|--|---------|-------------|--|---------|-------------|--|---------|-------------|--|---------|-------------|--|---------|-------------|--|---------|-------------|--|---------|-------------|--|---------|-------------|--|---------|-------------|--|---------|-------------|--|---------|-------------|--|---------|-------------|--|---------|-------------|--|---------|-------------|--|---------|-------------|--|---------|-------------|--|---------|--------------|--|---------|--------------|--|---------|--------------|--|---------|--------------|--|---------|--------------|--|---------|--------------|--|---------|--------------|--|---------|--------------|--|---------|--------------|--|---------|--------------|--|---------|--------------|--|---------|--------------|--|---------|--------------|--|---------|--------------|--|---------|--------------|--|---------|--------------|--|---------|--------------|--|---------|--------------|--|---------|--------------|--|---------|--------------|--|---------|--------------|--|---------|--------------|--|---------|--------------|--|---------|--------------|--|---------|--------------|--|---------|--------------|--|---------|--------------|--|---------|--------------|--|---------|--------------|--|---------|--------------|--|---------|--------------|--|---------|--------------|--|---------|--------------|--|---------|--------------|--|---------|--------------|--|---------|--------------|--|---------|--------------|--|---------|--------------|--|---------|--------------|--|---------|--------------|--|---------|--------------|--|---------|--------------|--|---------|--------------|--|---------|--------------|--|---------|--------------|--|---------|--------------|--|---------|--------------|--|---------|--------------|--|---------|--------------|--|---------|--------------|--|---------|--------------|--|---------|--------------|--|---------|--------------|--|---------|--------------|--|---------|--------------|--|---------|--------------|--|---------|--------------|--|---------|--------------|--|---------|--------------|--|---------|--------------|--|---------|--------------|--|---------|--------------|--|---------|--------------|--|---------|--------------|--|---------|--------------|--|---------|--------------|--|---------|--------------|--|---------|--------------|--|---------|--------------|--|---------|--------------|--|---------|--------------|--|---------|--------------|--|---------|--------------|--|---------|--------------|--|---------|--------------|--|---------|--------------|--|---------|--------------|--|---------|--------------|--|---------|--------------|--|---------|--------------|--|---------|--------------|--|---------|--------------|--|---------|--------------|--|---------|--------------|--|---------|--------------|--|---------|--------------|--|---------|--------------|--|---------|--------------|--|---------|--------------|--|---------|--------------|--|---------|--------------|--|---------|--------------|--|---------|--------------|--|---------|--------------|--|---------|--------------|--|---------|--------------|--|---------|--------------|--|---------|--------------|--|---------|--------------|--|---------|--------------|--|---------|--------------|--|---------|--------------|--|---------|--------------|--|---------|--------------|--|---------|--------------|--|---------|--------------|--|---------|--------------|--|---------|--------------|--|---------|--------------|--|---------|--------------|--|---------|--------------|--|---------|--------------|--|---------|--------------|--|---------|--------------|--|---------|--------------|--|---------|--------------|--|---------|--------------|--|---------|--------------|--|---------|--------------|--|---------|--------------|--|---------|--------------|--|---------|--------------|--|---------|--------------|--|---------|--------------|--|---------|--------------|--|---------|--------------|--|---------|--------------|--|---------|--------------|--|---------|--------------|--|---------|--------------|--|---------|--------------|--|---------|--------------|--|---------|--------------|--|---------|--------------|--|---------|--------------|--|---------|--------------|--|---------|--------------|--|---------|--------------|--|---------|--------------|--|---------|--------------|--|---------|--------------|--|---------|--------------|--|---------|--------------|--|---------|--------------|--|---------|--------------|--|---------|--------------|--|---------|--------------|--|---------|--------------|--|---------|--------------|--|---------|--------------|--|---------|--------------|--|---------|--------------|--|---------|--------------|--|---------|--------------|--|---------|--------------|--|---------|--------------|--|---------|--------------|--|---------|--------------|--|---------|---|
|---------|---------|-------------|--|---------|-------------|--|---------|-------------|--|---------|-------------|--|---------|-------------|--|---------|-------------|--|---------|-------------|--|---------|-------------|--|---------|-------------|--|---------|-------------|--|---------|-------------|--|---------|-------------|--|---------|-------------|--|---------|-------------|--|---------|-------------|--|---------|-------------|--|---------|-------------|--|---------|-------------|--|---------|-------------|--|---------|-------------|--|---------|-------------|--|---------|-------------|--|---------|-------------|--|---------|-------------|--|---------|-------------|--|---------|-------------|--|---------|-------------|--|---------|-------------|--|---------|-------------|--|---------|-------------|--|---------|-------------|--|---------|-------------|--|---------|-------------|--|---------|-------------|--|---------|-------------|--|---------|-------------|--|---------|-------------|--|---------|-------------|--|---------|-------------|--|---------|-------------|--|---------|-------------|--|---------|-------------|--|---------|-------------|--|---------|-------------|--|---------|-------------|--|---------|-------------|--|---------|-------------|--|---------|-------------|--|---------|-------------|--|---------|-------------|--|---------|-------------|--|---------|-------------|--|---------|-------------|--|---------|-------------|--|---------|-------------|--|---------|-------------|--|---------|-------------|--|---------|-------------|--|---------|-------------|--|---------|-------------|--|---------|-------------|--|---------|-------------|--|---------|-------------|--|---------|-------------|--|---------|-------------|--|---------|-------------|--|---------|-------------|--|---------|-------------|--|---------|-------------|--|---------|-------------|--|---------|-------------|--|---------|-------------|--|---------|-------------|--|---------|-------------|--|---------|-------------|--|---------|-------------|--|---------|-------------|--|---------|-------------|--|---------|-------------|--|---------|-------------|--|---------|-------------|--|---------|-------------|--|---------|-------------|--|---------|-------------|--|---------|-------------|--|---------|-------------|--|---------|-------------|--|---------|-------------|--|---------|-------------|--|---------|-------------|--|---------|-------------|--|---------|-------------|--|---------|-------------|--|---------|--------------|--|---------|--------------|--|---------|--------------|--|---------|--------------|--|---------|--------------|--|---------|--------------|--|---------|--------------|--|---------|--------------|--|---------|--------------|--|---------|--------------|--|---------|--------------|--|---------|--------------|--|---------|--------------|--|---------|--------------|--|---------|--------------|--|---------|--------------|--|---------|--------------|--|---------|--------------|--|---------|--------------|--|---------|--------------|--|---------|--------------|--|---------|--------------|--|---------|--------------|--|---------|--------------|--|---------|--------------|--|---------|--------------|--|---------|--------------|--|---------|--------------|--|---------|--------------|--|---------|--------------|--|---------|--------------|--|---------|--------------|--|---------|--------------|--|---------|--------------|--|---------|--------------|--|---------|--------------|--|---------|--------------|--|---------|--------------|--|---------|--------------|--|---------|--------------|--|---------|--------------|--|---------|--------------|--|---------|--------------|--|---------|--------------|--|---------|--------------|--|---------|--------------|--|---------|--------------|--|---------|--------------|--|---------|--------------|--|---------|--------------|--|---------|--------------|--|---------|--------------|--|---------|--------------|--|---------|--------------|--|---------|--------------|--|---------|--------------|--|---------|--------------|--|---------|--------------|--|---------|--------------|--|---------|--------------|--|---------|--------------|--|---------|--------------|--|---------|--------------|--|---------|--------------|--|---------|--------------|--|---------|--------------|--|---------|--------------|--|---------|--------------|--|---------|--------------|--|---------|--------------|--|---------|--------------|--|---------|--------------|--|---------|--------------|--|---------|--------------|--|---------|--------------|--|---------|--------------|--|---------|--------------|--|---------|--------------|--|---------|--------------|--|---------|--------------|--|---------|--------------|--|---------|--------------|--|---------|--------------|--|---------|--------------|--|---------|--------------|--|---------|--------------|--|---------|--------------|--|---------|--------------|--|---------|--------------|--|---------|--------------|--|---------|--------------|--|---------|--------------|--|---------|--------------|--|---------|--------------|--|---------|--------------|--|---------|--------------|--|---------|--------------|--|---------|--------------|--|---------|--------------|--|---------|--------------|--|---------|--------------|--|---------|--------------|--|---------|--------------|--|---------|--------------|--|---------|--------------|--|---------|--------------|--|---------|--------------|--|---------|--------------|--|---------|--------------|--|---------|--------------|--|---------|--------------|--|---------|--------------|--|---------|--------------|--|---------|--------------|--|---------|--------------|--|---------|--------------|--|---------|--------------|--|---------|--------------|--|---------|--------------|--|---------|--------------|--|---------|--------------|--|---------|--------------|--|---------|--------------|--|---------|--------------|--|---------|--------------|--|---------|--------------|--|---------|--------------|--|---------|--------------|--|---------|--------------|--|---------|--------------|--|---------|--------------|--|---------|--------------|--|---------|--------------|--|---------|--------------|--|---------|--------------|--|---------|--------------|--|---------|--------------|--|---------|--------------|--|---------|--------------|--|---------|--------------|--|---------|--------------|--|---------|--------------|--|---------|--------------|--|---------|--------------|--|---------|--------------|--|---------|--------------|--|---------|--------------|--|---------|--------------|--|---------|--------------|--|---------|--------------|--|---------|--------------|--|---------|--------------|--|---------|--------------|--|---------|--------------|--|---------|--------------|--|---------|--------------|--|---------|--------------|--|---------|--------------|--|---------|---|

File: ESM\_10 (Online Resource 10)

Title: Comparative Multidimensional Molecular Analyses of Pediatric Diffuse Intrinsic Piloile Glomus Reveals Distinct Molecular Subtypes

Journal: Acta Neurochirurgica

Authors: Amanda M. Senn, Madhuri Kumbhakar, Kendall Snyder, Sidick Yavuz, Joe Deveney,

Brian Harmon, Jordan Hall, Eric H. Raabe, Ping An, Melanie Weingart, Brian Reid, Sarah Magee, Roger J. Packer, Javad Nazarian

Corresponding Author:

Javad Nazarian, Children's National Medical Center, Center for Genetic Medicine

111 Michigan Ave., NW, Washington DC, 20010

Phone: 202-476-6022 Fax: 202-476-6014

Email: J.Nazarian@CNMC.org

| p-value[106] |  | Meanaratio<br>FolddChange[106] |  | p-value[111] |  | Meanaratio<br>FolddChange[111] |  | p-value[112] |  | Meanaratio<br>FolddChange[112] |  | p-value[121] |  | Meanaratio<br>FolddChange[121] |  | p-value[137] |  | Meanaratio<br>FolddChange[137] |  | p-value[153] |  | Meanaratio<br>FolddChange[153] |  | p-value[165] |  | Meanaratio<br>FolddChange[165] |  | p-value[179] |  | Meanaratio<br>FolddChange[179] |  | p-value[188] |  | Meanaratio<br>FolddChange[188] |  | p-value[199] |  | Meanaratio<br>FolddChange[199] |  | p-value[200] |  | Meanaratio<br>FolddChange[200] |  | p-value[201] |  | Meanaratio<br>FolddChange[201] |  | p-value[202] |  | Meanaratio<br>FolddChange[202] |  | p-value[203] |  | Meanaratio<br>FolddChange[203] |  | p-value[204] |  | Meanaratio<br>FolddChange[204] |  | p-value[205] |  | Meanaratio<br>FolddChange[205] |  | p-value[206] |  | Meanaratio<br>FolddChange[206] |  | p-value[207] |  | Meanaratio<br>FolddChange[207] |  | p-value[208] |  | Meanaratio<br>FolddChange[208] |  | p-value[209] |  | Meanaratio<br>FolddChange[209] |  | p-value[210] |  | Meanaratio<br>FolddChange[210] |  | p-value[211] |  | Meanaratio<br>FolddChange[211] |  | p-value[212] |  | Meanaratio<br>FolddChange[212] |  | p-value[213] |  | Meanaratio<br>FolddChange[213] |  | p-value[214] |  | Meanaratio<br>FolddChange[214] |  | p-value[215] |  | Meanaratio<br>FolddChange[215] |  | p-value[216] |  | Meanaratio<br>FolddChange[216] |  | p-value[217] |  | Meanaratio<br>FolddChange[217] |  | p-value[218] |  | Meanaratio<br>FolddChange[218] |  | p-value[219] |  | Meanaratio<br>FolddChange[219] |  | p-value[220] |  | Meanaratio<br>FolddChange[220] |  | p-value[221] |  | Meanaratio<br>FolddChange[221] |  | p-value[222] |  | Meanaratio<br>FolddChange[222] |  | p-value[223] |  | Meanaratio<br>FolddChange[223] |  | p-value[224] |  | Meanaratio<br>FolddChange[224] |  | p-value[225] |  | Meanaratio<br>FolddChange[225] |  | p-value[226] |  | Meanaratio<br>FolddChange[226] |  | p-value[227] |  | Meanaratio<br>FolddChange[227] |  | p-value[228] |  | Meanaratio<br>FolddChange[228] |  | p-value[229] |  | Meanaratio<br>FolddChange[229] |  | p-value[230] |  | Meanaratio<br>FolddChange[230] |  | p-value[231] |  | Meanaratio<br>FolddChange[231] |  | p-value[232] |  | Meanaratio<br>FolddChange[232] |  | p-value[233] |  | Meanaratio<br>FolddChange[233] |  | p-value[234] |  | Meanaratio<br>FolddChange[234] |  | p-value[235] |  | Meanaratio<br>FolddChange[235] |  | p-value[236] |  | Meanaratio<br>FolddChange[236] |  | p-value[237] |  | Meanaratio<br>FolddChange[237] |  | p-value[238] |  | Meanaratio<br>FolddChange[238] |  | p-value[239] |  | Meanaratio<br>FolddChange[239] |  | p-value[240] |  | Meanaratio<br>FolddChange[240] |  | p-value[241] |  | Meanaratio<br>FolddChange[241] |  | p-value[242] |  | Meanaratio<br>FolddChange[242] |  | p-value[243] |  | Meanaratio<br>FolddChange[243] |  | p-value[244] |  | Meanaratio<br>FolddChange[244] |  | p-value[245] |  | Meanaratio<br>FolddChange[245] |  | p-value[246] |  | Meanaratio<br>FolddChange[246] |  | p-value[247] |  | Meanaratio<br>FolddChange[247] |  | p-value[248] |  | Meanaratio<br>FolddChange[248] |  | p-value[249] |  | Meanaratio<br>FolddChange[249] |  | p-value[250] |  | Meanaratio<br>FolddChange[250] |  | p-value[251] |  | Meanaratio<br>FolddChange[251] |  | p-value[252] |  | Meanaratio<br>FolddChange[252] |  | p-value[253] |  | Meanaratio<br>FolddChange[253] |  | p-value[254] |  | Meanaratio<br>FolddChange[254] |  | p-value[255] |  | Meanaratio<br>FolddChange[255] |  | p-value[256] |  | Meanaratio<br>FolddChange[256] |  | p-value[257] |  | Meanaratio<br>FolddChange[257] |  | p-value[258] |  | Meanaratio<br>FolddChange[258] |  | p-value[259] |  | Meanaratio<br>FolddChange[259] |  | p-value[260] |  | Meanaratio<br>FolddChange[260] |  | p-value[261] |  | Meanaratio<br>FolddChange[261] |  | p-value[262] |  | Meanaratio<br>FolddChange[262] |  | p-value[263] |  | Meanaratio<br>FolddChange[263] |  | p-value[264] |  | Meanaratio<br>FolddChange[264] |  | p-value[265] |  | Meanaratio<br>FolddChange[265] |  | p-value[266] |  | Meanaratio<br>FolddChange[266] |  | p-value[267] |  | Meanaratio<br>FolddChange[267] |  | p-value[268] |  | Meanaratio<br>FolddChange[268] |  | p-value[269] |  | Meanaratio<br>FolddChange[269] |  | p-value[270] |  | Meanaratio<br>FolddChange[270] |  | p-value[271] |  | Meanaratio<br>FolddChange[271] |  | p-value[272] |  | Meanaratio<br>FolddChange[272] |  | p-value[273] |  | Meanaratio<br>FolddChange[273] |  | p-value[274] |  | Meanaratio<br>FolddChange[274] |  | p-value[275] |  | Meanaratio<br>FolddChange[275] |  | p-value[276] |  | Meanaratio<br>FolddChange[276] |  | p-value[277] |  | Meanaratio<br>FolddChange[277] |  | p-value[278] |  | Meanaratio<br>FolddChange[278] |  | p-value[279] |  | Meanaratio<br>FolddChange[279] |  | p-value[280] |  | Meanaratio<br>FolddChange[280] |  | p-value[281] |  | Meanaratio<br>FolddChange[281] |  | p-value[282] |  | Meanaratio<br>FolddChange[282] |  | p-value[283] |  | Meanaratio<br>FolddChange[283] |  | p-value[284] |  | Meanaratio<br>FolddChange[284] |  | p-value[285] |  | Meanaratio<br>FolddChange[285] |  | p-value[286] |  | Meanaratio<br>FolddChange[286] |  | p-value[287] |  | Meanaratio<br>FolddChange[287] |  | p-value[288] |  | Meanaratio<br>FolddChange[288] |  | p-value[289] |  | Meanaratio<br>FolddChange[289] |  | p-value[290] |  | Meanaratio<br>FolddChange[290] |  | p-value[291] |  | Meanaratio<br>FolddChange[291] |  | p-value[292] |  | Meanaratio<br>FolddChange[292] |  | p-value[293] |  | Meanaratio<br>FolddChange[293] |  | p-value[294] |  | Meanaratio<br>FolddChange[294] |  | p-value[295] |  | Meanaratio<br>FolddChange[295] |  | p-value[296] |  | Meanaratio<br>FolddChange[296] |  | p-value[297] |  | Meanaratio<br>FolddChange[297] |  | p-value[298] |  | Meanaratio<br>FolddChange[298] |  | p-value[299] |  | Meanaratio<br>FolddChange[299] |  | p-value[300] |  | Meanaratio<br>FolddChange[300] |  | p-value[301] |  | Meanaratio<br>FolddChange[301] |  | p-value[302] |  | Meanaratio<br>FolddChange[302] |  | p-value[303] |  | Meanaratio<br>FolddChange[303] |  | p-value[304] |  | Meanaratio<br>FolddChange[304] |  | p-value[305] |  | Meanaratio<br>FolddChange[305] |  | p-value[306] |  | Meanaratio<br>FolddChange[306] |  | p-value[307] |  | Meanaratio<br>FolddChange[307] |  | p-value[308] |  | Meanaratio<br>FolddChange[308] |  | p-value[309] |  | Meanaratio<br>FolddChange[309] |  | p-value[310] |  | Meanaratio<br>FolddChange[310] |  | p-value[311] |  | Meanaratio<br>FolddChange[311] |  | p-value[312] |  | Meanaratio<br>FolddChange[312] |  | p-value[313] |  | Meanaratio<br>FolddChange[313] |  | p-value[314] |  | Meanaratio<br>FolddChange[314] |  | p-value[315] |  | Meanaratio<br>FolddChange[315] |  | p-value[316] |  | Meanaratio<br>FolddChange[316] |  | p-value[317] |  | Meanaratio<br>FolddChange[317] |  | p-value[318] |  | Meanaratio<br>FolddChange[318] |  | p-value[319] |  | Meanaratio<br>FolddChange[319] |  | p-value[320] |  | Meanaratio<br>FolddChange[320] |  | p-value[321] |  | Meanaratio<br>FolddChange[321] |  | p-value[322] |  | Meanaratio<br>FolddChange[322] |  | p-value[323] |  | Meanaratio<br>FolddChange[323] |  | p-value[324] |  | Meanaratio<br>FolddChange[324] |  | p-value[325] |  | Meanaratio<br>FolddChange[325] |  | p-value[326] |  | Meanaratio<br>FolddChange[326] |  | p-value[327] |  | Meanaratio<br>FolddChange[327] |  | p-value[328] |  | Meanaratio<br>FolddChange[328] |  | p-value[329] |  | Meanaratio<br>FolddChange[329] |  | p-value[330] |  | Meanaratio<br>FolddChange[330] |  | p-value[331] |  | Meanaratio<br>FolddChange[331] |  | p-value[332] |  | Meanaratio<br>FolddChange[332] |  | p-value[333] |  | Meanaratio<br>FolddChange[333] |  | p-value[334] |  | Meanaratio<br>FolddChange[334] |  | p-value[335] |  | Meanaratio<br>FolddChange[335] |  | p-value[336] |  | Meanaratio<br>FolddChange[336] |  | p-value[337] |  | Meanaratio<br>FolddChange[337] |  | p-value[338] |  | Meanaratio<br>FolddChange[338] |  | p-value[339] |  | Meanaratio<br>FolddChange[339] |  | p-value[340] |  | Meanaratio<br>FolddChange[340] |  | p-value[341] |  | Meanaratio<br>FolddChange[341] |  | p-value[342] |  | Meanaratio<br>FolddChange[342] |  | p-value[343] |  | Meanaratio<br>FolddChange[343] |  | p-value[344] |  | Meanaratio<br>FolddChange[344] |  | p-value[345] |  | Meanaratio<br>FolddChange[345] |  | p-value[346] |  | Meanaratio<br>FolddChange[346] |  | p-value[347] |  | Meanaratio<br>FolddChange[347] |  | p-value[348] |  | Meanaratio<br>FolddChange[348] |  | p-value[349] |  | Meanaratio<br>FolddChange[349] |  | p-value[350] |  | Meanaratio<br>FolddChange[350] |  | p-value[351] |  | Meanaratio<br>FolddChange[351] |  | p-value[352] |  | Meanaratio<br>FolddChange[352] |  | p-value[353] |  | Meanaratio<br>FolddChange[353] |  | p-value[354] |  | Meanaratio<br>FolddChange[354] |  | p-value[355] |  | Meanaratio<br>FolddChange[355] |  | p-value[356] |  | Meanaratio<br>FolddChange[356] |  | p-value[357] |  | Meanaratio<br>FolddChange[357] |  | p-value[358] |  | Meanaratio<br>FolddChange[358] |  | p-value[359] |  | Meanaratio<br>FolddChange[359] |  | p-value[360] |  | Meanaratio<br>FolddChange[360] |  | p-value[361] |  | Meanaratio<br>FolddChange[361] |  | p-value[362] |  | Meanaratio<br>FolddChange[362] |  | p-value[363] |  | Meanaratio<br>FolddChange[363] |  | p-value[364] |  | Meanaratio<br>FolddChange[364] |  | p-value[365] |  | Meanaratio<br>FolddChange[365] |  | p-value[366] |  | Meanaratio<br>FolddChange[366] |  | p-value[367] |  | Meanaratio<br>FolddChange[367] |  | p-value[368] |  | Meanaratio<br>FolddChange[368] |  | p-value[369] |  | Meanaratio<br>FolddChange[369] |  | p-value[370] |  | Meanaratio<br>FolddChange[370] |  | p-value[371] |  | Meanaratio<br>FolddChange[371] |  | p-value[372] |  | Meanaratio<br>FolddChange[372] |  | p-value[373] |  | Meanaratio<br>FolddChange[373] |  | p-value[374] |  | Meanaratio<br>FolddChange[374] |  | p-value[375] |  | Meanaratio<br>FolddChange[375] |  | p-value[376] |  | Meanaratio<br>FolddChange[376] |  | p-value[377] |  | Meanaratio<br>FolddChange[377] |  | p-value[378] |  | Meanaratio<br>FolddChange[378] |  | p-value[379] |  | Meanaratio<br>FolddChange[379] |  | p-value[380] |  | Meanaratio<br>FolddChange[380] |  | p-value[381] |  | Meanaratio<br>FolddChange[381] |  | p-value[382] |  | Meanaratio<br>FolddChange[382] |  | p-value[383] |  | Meanaratio<br>FolddChange[383] |  | p-value[384] |  | Meanaratio<br>FolddChange[384] |  | p-value[385] |  | Meanaratio<br>FolddChange[385] |  | p-value[386] |  | Meanaratio<br>FolddChange[386] |  | p-value[387] |  | Meanaratio<br>FolddChange[387] |  | p-value[388] |  | Meanaratio<br>FolddChange[388] |  | p-value[389] |  | Meanaratio<br>FolddChange[389] |  | p-value[390] |  | Meanaratio<br>FolddChange[390] |  | p-value[391] |  | Meanaratio<br>FolddChange[391] |  | p-value[392] |  | Meanaratio<br>FolddChange[392] |  | p-value[393] |  | Meanaratio<br>FolddChange[393] |  | p-value[394] |  | Meanaratio<br>FolddChange[394] |  | p-value[395] |  | Meanaratio<br>FolddChange[395] |  | p-value[396] |  | Meanaratio<br>FolddChange[396] |  | p-value[397] |  | Meanaratio<br>FolddChange[397] |  | p-value[398] |  | Meanaratio<br>FolddChange[398] |  | p-value[399] |  | Meanaratio<br>FolddChange[399] |  | p-value[400] |  | Meanaratio<br>FolddChange[400] |  | p-value[401] |  | Meanaratio<br>FolddChange[401] |  | p-value[402] |  | Meanaratio<br>FolddChange[402] |  | p-value[403] |  | Meanaratio<br>FolddChange[403] |  | p-value[404] |  | Meanaratio<br>FolddChange[404] |  | p-value[405] |  | Meanaratio<br>FolddChange[405] |  | p-value[406] |  | Meanaratio<br>FolddChange[406] |  | p-value[407] |  | Meanaratio<br>FolddChange[407] |  | p-value[408] |  | Meanaratio<br>FolddChange[408] |  | p-value[409] |  | Meanaratio<br>FolddChange[409] |  | p-value[410] |  | Meanaratio<br>FolddChange[410] |  | p-value[411] |  | Meanaratio<br>FolddChange[411] |  | p-value[412] |  | Meanaratio<br>FolddChange[412] |  | p-value[413] |  | Meanaratio<br>FolddChange[413] |  | p-value[414] |  | Meanaratio<br>FolddChange[414] |  | p-value[415] |  | Meanaratio<br>FolddChange[415] |  | p-value[416] |  | Meanaratio<br>FolddChange[416] |  | p-value[417] |  | Meanaratio<br>FolddChange[417] |  | p-value[418] |  | Meanaratio<br>FolddChange[418] |  | p-value[419] |  | Meanaratio<br>FolddChange[419] |  | p-value[420] |  | Meanaratio<br>FolddChange[420] |  | p-value[421] |  | Meanaratio<br>FolddChange[421] |  | p-value[422] |  | Meanaratio<br>FolddChange[422] |  | p-value[423] |  | Meanaratio<br>FolddChange[423] |  | p-value[424] |  | Meanaratio<br>FolddChange[424] |  | p-value[425] |  | Meanaratio<br>FolddChange[425] |  | p-value[426] |  | Meanaratio<br>FolddChange[426] |  | p-value[427] |  | Meanaratio<br>FolddChange[427] |  | p-value[428] |  | Meanaratio<br>FolddChange[428] |  | p-value[429] |  | Meanaratio<br>FolddChange[429] |  | p-value[430] |  | Meanaratio<br>FolddChange[430] |  | p-value[431] |  | Meanaratio<br>FolddChange[431] |  | p-value[432] |  | Meanaratio<br>FolddChange[432] |  | p-value[433] |  | Meanaratio<br>FolddChange[433] |  | p-value[434] |  | Meanaratio<br>FolddChange[434] |  | p-value[435] |  | Meanaratio<br>FolddChange[435] |  | p-value[436] |  | Meanaratio<br>FolddChange[436] |  | p-value[437] |  | Meanaratio<br>FolddChange[437] |  | p-value[438] |  | Meanaratio<br>FolddChange[438] |  | p-value[439] |  | Meanaratio<br>FolddChange[439] |  | p-value[440] |  | Meanaratio<br>FolddChange[440] |  | p-value[441] |  | Meanaratio<br>FolddChange[441] |  | p-value[442] |  | Meanaratio<br>FolddChange[442] |  | p-value[443] |  | Meanaratio<br>FolddChange[443] |  | p-value[444] |  | Meanaratio<br>FolddChange[444] |  | p-value[445] |  | Meanaratio<br>FolddChange[445] |  | p-value[446] |  | Meanaratio<br>FolddChange[446] |  | p-value[447] |  | Meanaratio<br>FolddChange[447] |  | p-value[448] |  | Meanaratio<br>FolddChange[448] |  | p-value[449] |  | Meanaratio<br>FolddChange[449] |  | p-value[450] |  | Meanaratio<br>FolddChange[450] |  | p-value[451] |  | Meanaratio<br>FolddChange[451] |  | p-value[452] |  | Meanaratio<br>FolddChange[452] |  | p-value[453] |  | Meanaratio<br>FolddChange[453] |  | p-value[454] |  | Meanaratio<br>FolddChange[454] |  | p-value[455] |  | Meanaratio<br>FolddChange[455] |  | p-value[456] |  | Meanaratio<br>FolddChange[456] |  | p-value[457] |  | Meanaratio<br>FolddChange[457] |  | p-value[458] |  | Meanaratio<br>FolddChange[458] |  | p-value[459] |  | Meanaratio<br>FolddChange[459] |  | p-value[460] |  | Meanaratio<br>FolddChange[460] |  | p-value[461] |  | Meanaratio<br>FolddChange[461] |  | p-value[462] |  | Meanaratio<br>FolddChange[462] |  | p-value[463] |  | Meanaratio<br>FolddChange[463] |  | p-value[464] |  | Meanaratio<br>FolddChange[464] |  | p-value[465] |  | Meanaratio<br>FolddChange[465] |  | p-value[466] |  | Meanaratio<br>FolddChange[466] |  | p-value[467] |  | Meanaratio<br>FolddChange[467] |  | p-value[468] |  | Meanaratio<br>FolddChange[468] |  | p-value[469] |  | Meanaratio<br>FolddChange[469] |  | p-value[470] |  | Meanaratio<br>FolddChange[470] |  | p-value[471] |  | Meanaratio<br>FolddChange[471] |  | p-value[472] |  | Meanaratio<br>FolddChange[472] |  | p-value[473] |  | Meanaratio<br>FolddChange[473] |  | p-value[474] |  | Meanaratio<br>FolddChange[474] |  | p-value[475] |  | Meanaratio<br>FolddChange[475] |  | p-value[476] |  | Meanaratio<br>FolddChange[476] |  | p-value[477] |  | Meanaratio<br>FolddChange[477] |  | p-value[478] |  | Meanaratio<br>FolddChange[478] |  | p-value[479] |  | Meanaratio<br>FolddChange[479] |  | p-value[480] |  | Meanaratio<br>FolddChange[480] |  | p-value[481] |  | Meanaratio<br>FolddChange[481] |  | p-value[482] |  | Meanaratio<br>FolddChange[482] |  | p-value[483] |  | Meanaratio<br>FolddChange[483] |  | p-value[484] |  | Meanaratio<br>FolddChange[484] |  | p-value[485] |  | Meanaratio<br>FolddChange[485] |  | p-value[486] |  | Meanaratio<br>FolddChange[486] |  | p-value[487] |  | Meanaratio<br>FolddChange[487] |  | p-value[488] |  | Meanaratio<br>FolddChange[488] |  | p-value[489] |  | Meanaratio<br>FolddChange[489] |  | p-value[490] |  | Meanaratio<br>FolddChange[490] |  | p-value[491] |  | Meanaratio<br>FolddChange[491] |  | p-value[492] |  | Meanaratio<br>FolddChange[492] |  | p-value[493] |  | Meanaratio<br>FolddChange[493] |  | p-value[494] |  | Meanaratio<br>FolddChange[494] |  | p-value[495] |  | Meanaratio<br>FolddChange[495] |  | p-value[496] |  | Meanaratio<br>FolddChange[496] |  | p-value[497] |  | Meanaratio<br>FolddChange[497] |  | p-value[498] |  | Meanaratio<br>FolddChange[498] |  | p-value[499] |  | Meanaratio<br>FolddChange[499] |  | p-value[500] |  | Meanaratio<br>FolddChange[500] |  | p-value[501] |  | Meanaratio<br>FolddChange[501] |  | p-value[502] |  | Meanaratio<br>FolddChange[502] |  | p-value[503] |  | Meanaratio<br>FolddChange[503] |  | p-value[504] |  | Meanaratio<br>FolddChange[504] |  | p-value[505] |  | Meanaratio<br>FolddChange[505] |  | p-value[506] |  | Meanaratio<br>FolddChange[506] |  | p-value[507] |  | Meanaratio<br>FolddChange[507] |  | p-value[508] |  | Meanaratio<br>FolddChange[508] |  | p-value[509] |  | Meanaratio<br>FolddChange[509] |  | p-value[510] |  | Meanaratio<br>FolddChange[510] |  | p-value[511] |  | Meanaratio<br>FolddChange[511] |  | p-value[512] |  | Meanaratio<br>FolddChange[512] |  | p-value[513] |  | Meanaratio<br>FolddChange[513] |  | p-value[514] |  | Meanaratio<br>FolddChange[514] |  | p-value[515] |  | Meanaratio<br>FolddChange[515] |  | p-value[516] |  | Meanaratio<br>FolddChange[516] |  | p-value[517] |  | Meanaratio<br>FolddChange[517] |  | p-value[518] |  | Meanaratio<br>FolddChange[518] |  | p-value[519] |  | Meanaratio<br>FolddChange[519] |  | p-value[520] |  | Meanaratio<br>FolddChange[520] |  | p-value[521] |  | Meanaratio<br>FolddChange[521] |  | p-value[522] |  | Meanaratio<br>FolddChange[522] |  | p-value[523] |  | Meanaratio<br>FolddChange[523] |  | p-value[524] |  | Meanaratio<br>FolddChange[524] |  | p-value[525] |  | Meanaratio<br>FolddChange[525] |  | p-value[526] |  | Meanaratio<br>FolddChange[526] |  | p-value[527] |  | Meanaratio<br>FolddChange[527] |  | p-value[528] |  | Meanaratio<br>FolddChange[528] |  | p-value[529] |  | Meanaratio<br>FolddChange[529] |  | p-value[530] |  | Meanaratio<br>FolddChange[530] |  | p-value[531] |  | Meanaratio<br>FolddChange[531] |  | p-value[532] |  | Meanaratio<br>FolddChange[532] |  | p-value[533] |  | Meanaratio<br>FolddChange[533] |  | p-value[534] |  | Meanaratio<br>FolddChange[534] |  | p-value[535] |  | Meanaratio<br>FolddChange[535] |  | p-value[536] |  | Meanaratio<br>FolddChange[536] |  | p-value[537] |  | Meanaratio<br>FolddChange[537] |  | p-value[538] |  | Meanaratio<br>FolddChange[538] |  | p-value[539] |  | Meanaratio<br>FolddChange[539] |  | p-value[540] |  | Meanaratio<br>FolddChange[540] |  | p-value[541] |  | Meanaratio<br>FolddChange[541] |  | p-value[542] |  | Meanaratio<br>FolddChange[542] |  | p-value[543] |  | Meanaratio<br>F |  |
|--------------|--|--------------------------------|--|--------------|--|--------------------------------|--|--------------|--|--------------------------------|--|--------------|--|--------------------------------|--|--------------|--|--------------------------------|--|--------------|--|--------------------------------|--|--------------|--|--------------------------------|--|--------------|--|--------------------------------|--|--------------|--|--------------------------------|--|--------------|--|--------------------------------|--|--------------|--|--------------------------------|--|--------------|--|--------------------------------|--|--------------|--|--------------------------------|--|--------------|--|--------------------------------|--|--------------|--|--------------------------------|--|--------------|--|--------------------------------|--|--------------|--|--------------------------------|--|--------------|--|--------------------------------|--|--------------|--|--------------------------------|--|--------------|--|--------------------------------|--|--------------|--|--------------------------------|--|--------------|--|--------------------------------|--|--------------|--|--------------------------------|--|--------------|--|--------------------------------|--|--------------|--|--------------------------------|--|--------------|--|--------------------------------|--|--------------|--|--------------------------------|--|--------------|--|--------------------------------|--|--------------|--|--------------------------------|--|--------------|--|--------------------------------|--|--------------|--|--------------------------------|--|--------------|--|--------------------------------|--|--------------|--|--------------------------------|--|--------------|--|--------------------------------|--|--------------|--|--------------------------------|--|--------------|--|--------------------------------|--|--------------|--|--------------------------------|--|--------------|--|--------------------------------|--|--------------|--|--------------------------------|--|--------------|--|--------------------------------|--|--------------|--|--------------------------------|--|--------------|--|--------------------------------|--|--------------|--|--------------------------------|--|--------------|--|--------------------------------|--|--------------|--|--------------------------------|--|--------------|--|--------------------------------|--|--------------|--|--------------------------------|--|--------------|--|--------------------------------|--|--------------|--|--------------------------------|--|--------------|--|--------------------------------|--|--------------|--|--------------------------------|--|--------------|--|--------------------------------|--|--------------|--|--------------------------------|--|--------------|--|--------------------------------|--|--------------|--|--------------------------------|--|--------------|--|--------------------------------|--|--------------|--|--------------------------------|--|--------------|--|--------------------------------|--|--------------|--|--------------------------------|--|--------------|--|--------------------------------|--|--------------|--|--------------------------------|--|--------------|--|--------------------------------|--|--------------|--|--------------------------------|--|--------------|--|--------------------------------|--|--------------|--|--------------------------------|--|--------------|--|--------------------------------|--|--------------|--|--------------------------------|--|--------------|--|--------------------------------|--|--------------|--|--------------------------------|--|--------------|--|--------------------------------|--|--------------|--|--------------------------------|--|--------------|--|--------------------------------|--|--------------|--|--------------------------------|--|--------------|--|--------------------------------|--|--------------|--|--------------------------------|--|--------------|--|--------------------------------|--|--------------|--|--------------------------------|--|--------------|--|--------------------------------|--|--------------|--|--------------------------------|--|--------------|--|--------------------------------|--|--------------|--|--------------------------------|--|--------------|--|--------------------------------|--|--------------|--|--------------------------------|--|--------------|--|--------------------------------|--|--------------|--|--------------------------------|--|--------------|--|--------------------------------|--|--------------|--|--------------------------------|--|--------------|--|--------------------------------|--|--------------|--|--------------------------------|--|--------------|--|--------------------------------|--|--------------|--|--------------------------------|--|--------------|--|--------------------------------|--|--------------|--|--------------------------------|--|--------------|--|--------------------------------|--|--------------|--|--------------------------------|--|--------------|--|--------------------------------|--|--------------|--|--------------------------------|--|--------------|--|--------------------------------|--|--------------|--|--------------------------------|--|--------------|--|--------------------------------|--|--------------|--|--------------------------------|--|--------------|--|--------------------------------|--|--------------|--|--------------------------------|--|--------------|--|--------------------------------|--|--------------|--|--------------------------------|--|--------------|--|--------------------------------|--|--------------|--|--------------------------------|--|--------------|--|--------------------------------|--|--------------|--|--------------------------------|--|--------------|--|--------------------------------|--|--------------|--|--------------------------------|--|--------------|--|--------------------------------|--|--------------|--|--------------------------------|--|--------------|--|--------------------------------|--|--------------|--|--------------------------------|--|--------------|--|--------------------------------|--|--------------|--|--------------------------------|--|--------------|--|--------------------------------|--|--------------|--|--------------------------------|--|--------------|--|--------------------------------|--|--------------|--|--------------------------------|--|--------------|--|--------------------------------|--|--------------|--|--------------------------------|--|--------------|--|--------------------------------|--|--------------|--|--------------------------------|--|--------------|--|--------------------------------|--|--------------|--|--------------------------------|--|--------------|--|--------------------------------|--|--------------|--|--------------------------------|--|--------------|--|--------------------------------|--|--------------|--|--------------------------------|--|--------------|--|--------------------------------|--|--------------|--|--------------------------------|--|--------------|--|--------------------------------|--|--------------|--|--------------------------------|--|--------------|--|--------------------------------|--|--------------|--|--------------------------------|--|--------------|--|--------------------------------|--|--------------|--|--------------------------------|--|--------------|--|--------------------------------|--|--------------|--|--------------------------------|--|--------------|--|--------------------------------|--|--------------|--|--------------------------------|--|--------------|--|--------------------------------|--|--------------|--|--------------------------------|--|--------------|--|--------------------------------|--|--------------|--|--------------------------------|--|--------------|--|--------------------------------|--|--------------|--|--------------------------------|--|--------------|--|--------------------------------|--|--------------|--|--------------------------------|--|--------------|--|--------------------------------|--|--------------|--|--------------------------------|--|--------------|--|--------------------------------|--|--------------|--|--------------------------------|--|--------------|--|--------------------------------|--|--------------|--|--------------------------------|--|--------------|--|--------------------------------|--|--------------|--|--------------------------------|--|--------------|--|--------------------------------|--|--------------|--|--------------------------------|--|--------------|--|--------------------------------|--|--------------|--|--------------------------------|--|--------------|--|--------------------------------|--|--------------|--|--------------------------------|--|--------------|--|--------------------------------|--|--------------|--|--------------------------------|--|--------------|--|--------------------------------|--|--------------|--|--------------------------------|--|--------------|--|--------------------------------|--|--------------|--|--------------------------------|--|--------------|--|--------------------------------|--|--------------|--|--------------------------------|--|--------------|--|--------------------------------|--|--------------|--|--------------------------------|--|--------------|--|--------------------------------|--|--------------|--|--------------------------------|--|--------------|--|--------------------------------|--|--------------|--|--------------------------------|--|--------------|--|--------------------------------|--|--------------|--|--------------------------------|--|--------------|--|--------------------------------|--|--------------|--|--------------------------------|--|--------------|--|--------------------------------|--|--------------|--|--------------------------------|--|--------------|--|--------------------------------|--|--------------|--|--------------------------------|--|--------------|--|--------------------------------|--|--------------|--|--------------------------------|--|--------------|--|--------------------------------|--|--------------|--|--------------------------------|--|--------------|--|--------------------------------|--|--------------|--|--------------------------------|--|--------------|--|--------------------------------|--|--------------|--|--------------------------------|--|--------------|--|--------------------------------|--|--------------|--|--------------------------------|--|--------------|--|--------------------------------|--|--------------|--|--------------------------------|--|--------------|--|--------------------------------|--|--------------|--|--------------------------------|--|--------------|--|--------------------------------|--|--------------|--|--------------------------------|--|--------------|--|--------------------------------|--|--------------|--|--------------------------------|--|--------------|--|--------------------------------|--|--------------|--|--------------------------------|--|--------------|--|--------------------------------|--|--------------|--|--------------------------------|--|--------------|--|--------------------------------|--|--------------|--|--------------------------------|--|--------------|--|--------------------------------|--|--------------|--|--------------------------------|--|--------------|--|--------------------------------|--|--------------|--|--------------------------------|--|--------------|--|--------------------------------|--|--------------|--|--------------------------------|--|--------------|--|--------------------------------|--|--------------|--|--------------------------------|--|--------------|--|--------------------------------|--|--------------|--|--------------------------------|--|--------------|--|--------------------------------|--|--------------|--|--------------------------------|--|--------------|--|--------------------------------|--|--------------|--|--------------------------------|--|--------------|--|--------------------------------|--|--------------|--|--------------------------------|--|--------------|--|--------------------------------|--|--------------|--|--------------------------------|--|--------------|--|--------------------------------|--|--------------|--|--------------------------------|--|--------------|--|--------------------------------|--|--------------|--|--------------------------------|--|--------------|--|--------------------------------|--|--------------|--|--------------------------------|--|--------------|--|--------------------------------|--|--------------|--|--------------------------------|--|--------------|--|--------------------------------|--|--------------|--|--------------------------------|--|--------------|--|--------------------------------|--|--------------|--|--------------------------------|--|--------------|--|--------------------------------|--|--------------|--|--------------------------------|--|--------------|--|--------------------------------|--|--------------|--|--------------------------------|--|--------------|--|--------------------------------|--|--------------|--|--------------------------------|--|--------------|--|--------------------------------|--|--------------|--|--------------------------------|--|--------------|--|--------------------------------|--|--------------|--|--------------------------------|--|--------------|--|--------------------------------|--|--------------|--|--------------------------------|--|--------------|--|--------------------------------|--|--------------|--|--------------------------------|--|--------------|--|--------------------------------|--|--------------|--|--------------------------------|--|--------------|--|--------------------------------|--|--------------|--|--------------------------------|--|--------------|--|--------------------------------|--|--------------|--|--------------------------------|--|--------------|--|--------------------------------|--|--------------|--|--------------------------------|--|--------------|--|--------------------------------|--|--------------|--|--------------------------------|--|--------------|--|--------------------------------|--|--------------|--|--------------------------------|--|--------------|--|--------------------------------|--|--------------|--|--------------------------------|--|--------------|--|--------------------------------|--|--------------|--|--------------------------------|--|--------------|--|--------------------------------|--|--------------|--|--------------------------------|--|--------------|--|--------------------------------|--|--------------|--|--------------------------------|--|--------------|--|--------------------------------|--|--------------|--|--------------------------------|--|--------------|--|--------------------------------|--|--------------|--|--------------------------------|--|--------------|--|--------------------------------|--|--------------|--|--------------------------------|--|--------------|--|--------------------------------|--|--------------|--|--------------------------------|--|--------------|--|--------------------------------|--|--------------|--|--------------------------------|--|--------------|--|--------------------------------|--|--------------|--|--------------------------------|--|--------------|--|--------------------------------|--|--------------|--|--------------------------------|--|--------------|--|--------------------------------|--|--------------|--|--------------------------------|--|--------------|--|--------------------------------|--|--------------|--|--------------------------------|--|--------------|--|--------------------------------|--|--------------|--|--------------------------------|--|--------------|--|--------------------------------|--|--------------|--|--------------------------------|--|--------------|--|--------------------------------|--|--------------|--|--------------------------------|--|--------------|--|--------------------------------|--|--------------|--|--------------------------------|--|--------------|--|--------------------------------|--|--------------|--|--------------------------------|--|--------------|--|--------------------------------|--|--------------|--|--------------------------------|--|--------------|--|--------------------------------|--|--------------|--|--------------------------------|--|--------------|--|--------------------------------|--|--------------|--|--------------------------------|--|--------------|--|--------------------------------|--|--------------|--|--------------------------------|--|--------------|--|--------------------------------|--|--------------|--|--------------------------------|--|--------------|--|--------------------------------|--|--------------|--|--------------------------------|--|--------------|--|--------------------------------|--|--------------|--|--------------------------------|--|--------------|--|--------------------------------|--|--------------|--|--------------------------------|--|--------------|--|--------------------------------|--|--------------|--|--------------------------------|--|--------------|--|--------------------------------|--|--------------|--|--------------------------------|--|--------------|--|--------------------------------|--|--------------|--|--------------------------------|--|--------------|--|--------------------------------|--|--------------|--|--------------------------------|--|--------------|--|--------------------------------|--|--------------|--|--------------------------------|--|--------------|--|--------------------------------|--|--------------|--|--------------------------------|--|--------------|--|--------------------------------|--|--------------|--|--------------------------------|--|--------------|--|--------------------------------|--|--------------|--|--------------------------------|--|--------------|--|--------------------------------|--|--------------|--|--------------------------------|--|--------------|--|--------------------------------|--|--------------|--|--------------------------------|--|--------------|--|--------------------------------|--|--------------|--|--------------------------------|--|--------------|--|--------------------------------|--|--------------|--|--------------------------------|--|--------------|--|--------------------------------|--|--------------|--|--------------------------------|--|--------------|--|--------------------------------|--|--------------|--|--------------------------------|--|--------------|--|--------------------------------|--|--------------|--|--------------------------------|--|--------------|--|--------------------------------|--|--------------|--|--------------------------------|--|--------------|--|--------------------------------|--|--------------|--|--------------------------------|--|--------------|--|-----------------|--|
|--------------|--|--------------------------------|--|--------------|--|--------------------------------|--|--------------|--|--------------------------------|--|--------------|--|--------------------------------|--|--------------|--|--------------------------------|--|--------------|--|--------------------------------|--|--------------|--|--------------------------------|--|--------------|--|--------------------------------|--|--------------|--|--------------------------------|--|--------------|--|--------------------------------|--|--------------|--|--------------------------------|--|--------------|--|--------------------------------|--|--------------|--|--------------------------------|--|--------------|--|--------------------------------|--|--------------|--|--------------------------------|--|--------------|--|--------------------------------|--|--------------|--|--------------------------------|--|--------------|--|--------------------------------|--|--------------|--|--------------------------------|--|--------------|--|--------------------------------|--|--------------|--|--------------------------------|--|--------------|--|--------------------------------|--|--------------|--|--------------------------------|--|--------------|--|--------------------------------|--|--------------|--|--------------------------------|--|--------------|--|--------------------------------|--|--------------|--|--------------------------------|--|--------------|--|--------------------------------|--|--------------|--|--------------------------------|--|--------------|--|--------------------------------|--|--------------|--|--------------------------------|--|--------------|--|--------------------------------|--|--------------|--|--------------------------------|--|--------------|--|--------------------------------|--|--------------|--|--------------------------------|--|--------------|--|--------------------------------|--|--------------|--|--------------------------------|--|--------------|--|--------------------------------|--|--------------|--|--------------------------------|--|--------------|--|--------------------------------|--|--------------|--|--------------------------------|--|--------------|--|--------------------------------|--|--------------|--|--------------------------------|--|--------------|--|--------------------------------|--|--------------|--|--------------------------------|--|--------------|--|--------------------------------|--|--------------|--|--------------------------------|--|--------------|--|--------------------------------|--|--------------|--|--------------------------------|--|--------------|--|--------------------------------|--|--------------|--|--------------------------------|--|--------------|--|--------------------------------|--|--------------|--|--------------------------------|--|--------------|--|--------------------------------|--|--------------|--|--------------------------------|--|--------------|--|--------------------------------|--|--------------|--|--------------------------------|--|--------------|--|--------------------------------|--|--------------|--|--------------------------------|--|--------------|--|--------------------------------|--|--------------|--|--------------------------------|--|--------------|--|--------------------------------|--|--------------|--|--------------------------------|--|--------------|--|--------------------------------|--|--------------|--|--------------------------------|--|--------------|--|--------------------------------|--|--------------|--|--------------------------------|--|--------------|--|--------------------------------|--|--------------|--|--------------------------------|--|--------------|--|--------------------------------|--|--------------|--|--------------------------------|--|--------------|--|--------------------------------|--|--------------|--|--------------------------------|--|--------------|--|--------------------------------|--|--------------|--|--------------------------------|--|--------------|--|--------------------------------|--|--------------|--|--------------------------------|--|--------------|--|--------------------------------|--|--------------|--|--------------------------------|--|--------------|--|--------------------------------|--|--------------|--|--------------------------------|--|--------------|--|--------------------------------|--|--------------|--|--------------------------------|--|--------------|--|--------------------------------|--|--------------|--|--------------------------------|--|--------------|--|--------------------------------|--|--------------|--|--------------------------------|--|--------------|--|--------------------------------|--|--------------|--|--------------------------------|--|--------------|--|--------------------------------|--|--------------|--|--------------------------------|--|--------------|--|--------------------------------|--|--------------|--|--------------------------------|--|--------------|--|--------------------------------|--|--------------|--|--------------------------------|--|--------------|--|--------------------------------|--|--------------|--|--------------------------------|--|--------------|--|--------------------------------|--|--------------|--|--------------------------------|--|--------------|--|--------------------------------|--|--------------|--|--------------------------------|--|--------------|--|--------------------------------|--|--------------|--|--------------------------------|--|--------------|--|--------------------------------|--|--------------|--|--------------------------------|--|--------------|--|--------------------------------|--|--------------|--|--------------------------------|--|--------------|--|--------------------------------|--|--------------|--|--------------------------------|--|--------------|--|--------------------------------|--|--------------|--|--------------------------------|--|--------------|--|--------------------------------|--|--------------|--|--------------------------------|--|--------------|--|--------------------------------|--|--------------|--|--------------------------------|--|--------------|--|--------------------------------|--|--------------|--|--------------------------------|--|--------------|--|--------------------------------|--|--------------|--|--------------------------------|--|--------------|--|--------------------------------|--|--------------|--|--------------------------------|--|--------------|--|--------------------------------|--|--------------|--|--------------------------------|--|--------------|--|--------------------------------|--|--------------|--|--------------------------------|--|--------------|--|--------------------------------|--|--------------|--|--------------------------------|--|--------------|--|--------------------------------|--|--------------|--|--------------------------------|--|--------------|--|--------------------------------|--|--------------|--|--------------------------------|--|--------------|--|--------------------------------|--|--------------|--|--------------------------------|--|--------------|--|--------------------------------|--|--------------|--|--------------------------------|--|--------------|--|--------------------------------|--|--------------|--|--------------------------------|--|--------------|--|--------------------------------|--|--------------|--|--------------------------------|--|--------------|--|--------------------------------|--|--------------|--|--------------------------------|--|--------------|--|--------------------------------|--|--------------|--|--------------------------------|--|--------------|--|--------------------------------|--|--------------|--|--------------------------------|--|--------------|--|--------------------------------|--|--------------|--|--------------------------------|--|--------------|--|--------------------------------|--|--------------|--|--------------------------------|--|--------------|--|--------------------------------|--|--------------|--|--------------------------------|--|--------------|--|--------------------------------|--|--------------|--|--------------------------------|--|--------------|--|--------------------------------|--|--------------|--|--------------------------------|--|--------------|--|--------------------------------|--|--------------|--|--------------------------------|--|--------------|--|--------------------------------|--|--------------|--|--------------------------------|--|--------------|--|--------------------------------|--|--------------|--|--------------------------------|--|--------------|--|--------------------------------|--|--------------|--|--------------------------------|--|--------------|--|--------------------------------|--|--------------|--|--------------------------------|--|--------------|--|--------------------------------|--|--------------|--|--------------------------------|--|--------------|--|--------------------------------|--|--------------|--|--------------------------------|--|--------------|--|--------------------------------|--|--------------|--|--------------------------------|--|--------------|--|--------------------------------|--|--------------|--|--------------------------------|--|--------------|--|--------------------------------|--|--------------|--|--------------------------------|--|--------------|--|--------------------------------|--|--------------|--|--------------------------------|--|--------------|--|--------------------------------|--|--------------|--|--------------------------------|--|--------------|--|--------------------------------|--|--------------|--|--------------------------------|--|--------------|--|--------------------------------|--|--------------|--|--------------------------------|--|--------------|--|--------------------------------|--|--------------|--|--------------------------------|--|--------------|--|--------------------------------|--|--------------|--|--------------------------------|--|--------------|--|--------------------------------|--|--------------|--|--------------------------------|--|--------------|--|--------------------------------|--|--------------|--|--------------------------------|--|--------------|--|--------------------------------|--|--------------|--|--------------------------------|--|--------------|--|--------------------------------|--|--------------|--|--------------------------------|--|--------------|--|--------------------------------|--|--------------|--|--------------------------------|--|--------------|--|--------------------------------|--|--------------|--|--------------------------------|--|--------------|--|--------------------------------|--|--------------|--|--------------------------------|--|--------------|--|--------------------------------|--|--------------|--|--------------------------------|--|--------------|--|--------------------------------|--|--------------|--|--------------------------------|--|--------------|--|--------------------------------|--|--------------|--|--------------------------------|--|--------------|--|--------------------------------|--|--------------|--|--------------------------------|--|--------------|--|--------------------------------|--|--------------|--|--------------------------------|--|--------------|--|--------------------------------|--|--------------|--|--------------------------------|--|--------------|--|--------------------------------|--|--------------|--|--------------------------------|--|--------------|--|--------------------------------|--|--------------|--|--------------------------------|--|--------------|--|--------------------------------|--|--------------|--|--------------------------------|--|--------------|--|--------------------------------|--|--------------|--|--------------------------------|--|--------------|--|--------------------------------|--|--------------|--|--------------------------------|--|--------------|--|--------------------------------|--|--------------|--|--------------------------------|--|--------------|--|--------------------------------|--|--------------|--|--------------------------------|--|--------------|--|--------------------------------|--|--------------|--|--------------------------------|--|--------------|--|--------------------------------|--|--------------|--|--------------------------------|--|--------------|--|--------------------------------|--|--------------|--|--------------------------------|--|--------------|--|--------------------------------|--|--------------|--|--------------------------------|--|--------------|--|--------------------------------|--|--------------|--|--------------------------------|--|--------------|--|--------------------------------|--|--------------|--|--------------------------------|--|--------------|--|--------------------------------|--|--------------|--|--------------------------------|--|--------------|--|--------------------------------|--|--------------|--|--------------------------------|--|--------------|--|--------------------------------|--|--------------|--|--------------------------------|--|--------------|--|--------------------------------|--|--------------|--|--------------------------------|--|--------------|--|--------------------------------|--|--------------|--|--------------------------------|--|--------------|--|--------------------------------|--|--------------|--|--------------------------------|--|--------------|--|--------------------------------|--|--------------|--|--------------------------------|--|--------------|--|--------------------------------|--|--------------|--|--------------------------------|--|--------------|--|--------------------------------|--|--------------|--|--------------------------------|--|--------------|--|--------------------------------|--|--------------|--|--------------------------------|--|--------------|--|--------------------------------|--|--------------|--|--------------------------------|--|--------------|--|--------------------------------|--|--------------|--|--------------------------------|--|--------------|--|--------------------------------|--|--------------|--|--------------------------------|--|--------------|--|--------------------------------|--|--------------|--|--------------------------------|--|--------------|--|--------------------------------|--|--------------|--|--------------------------------|--|--------------|--|--------------------------------|--|--------------|--|--------------------------------|--|--------------|--|--------------------------------|--|--------------|--|--------------------------------|--|--------------|--|--------------------------------|--|--------------|--|--------------------------------|--|--------------|--|--------------------------------|--|--------------|--|--------------------------------|--|--------------|--|--------------------------------|--|--------------|--|--------------------------------|--|--------------|--|--------------------------------|--|--------------|--|--------------------------------|--|--------------|--|--------------------------------|--|--------------|--|--------------------------------|--|--------------|--|--------------------------------|--|--------------|--|--------------------------------|--|--------------|--|--------------------------------|--|--------------|--|--------------------------------|--|--------------|--|--------------------------------|--|--------------|--|--------------------------------|--|--------------|--|--------------------------------|--|--------------|--|--------------------------------|--|--------------|--|--------------------------------|--|--------------|--|--------------------------------|--|--------------|--|--------------------------------|--|--------------|--|--------------------------------|--|--------------|--|--------------------------------|--|--------------|--|--------------------------------|--|--------------|--|--------------------------------|--|--------------|--|--------------------------------|--|--------------|--|--------------------------------|--|--------------|--|--------------------------------|--|--------------|--|--------------------------------|--|--------------|--|--------------------------------|--|--------------|--|--------------------------------|--|--------------|--|--------------------------------|--|--------------|--|--------------------------------|--|--------------|--|--------------------------------|--|--------------|--|--------------------------------|--|--------------|--|--------------------------------|--|--------------|--|--------------------------------|--|--------------|--|--------------------------------|--|--------------|--|--------------------------------|--|--------------|--|--------------------------------|--|--------------|--|--------------------------------|--|--------------|--|--------------------------------|--|--------------|--|--------------------------------|--|--------------|--|--------------------------------|--|--------------|--|--------------------------------|--|--------------|--|--------------------------------|--|--------------|--|--------------------------------|--|--------------|--|--------------------------------|--|--------------|--|--------------------------------|--|--------------|--|--------------------------------|--|--------------|--|--------------------------------|--|--------------|--|--------------------------------|--|--------------|--|--------------------------------|--|--------------|--|--------------------------------|--|--------------|--|--------------------------------|--|--------------|--|--------------------------------|--|--------------|--|--------------------------------|--|--------------|--|--------------------------------|--|--------------|--|--------------------------------|--|--------------|--|--------------------------------|--|--------------|--|--------------------------------|--|--------------|--|--------------------------------|--|--------------|--|--------------------------------|--|--------------|--|--------------------------------|--|--------------|--|--------------------------------|--|--------------|--|--------------------------------|--|--------------|--|--------------------------------|--|--------------|--|--------------------------------|--|--------------|--|--------------------------------|--|--------------|--|--------------------------------|--|--------------|--|--------------------------------|--|--------------|--|--------------------------------|--|--------------|--|--------------------------------|--|--------------|--|--------------------------------|--|--------------|--|--------------------------------|--|--------------|--|--------------------------------|--|--------------|--|--------------------------------|--|--------------|--|--------------------------------|--|--------------|--|--------------------------------|--|--------------|--|--------------------------------|--|--------------|--|-----------------|--|









**Journal:** Acta Neuropathologica

Javad Nazarian, Children's National Medical Center, Center for

Phone: 202-476-6022 Fax: 202-476-6014  
E-mail: [DMcConnell@CMAA.org](mailto:DMcConnell@CMAA.org)

FoldChannel





File: ESM\_10 (Online Resource 10)

Comparative Multidimensional Molecular Analyses of Pediatric Diffuse Intrinsic Tumors: Gene Expression Profiles Reveal Distinct Molecular Subtypes  
Journal: Acta Neuropathologica

Authors: Amanda M. Sauter, Madhuri Kumbhakar, Kendall Snyder, Sidick Yavuz, Joe Deveney, Brennan Harmon, Jordan Hall, Eric H. Ruabe, Ping An, Melanie Weingart, Brian Ross, Sarah Mudge, Roger J. Packer, Javad Nazarian

Corresponding Author:

Javad Nazarian, Children's National Medical Center, Center for Genetic Medicine  
111 Michigan Ave., NW, Washington DC, 20010  
Tel: 202-476-6022 Fax: 202-476-6014  
Email: J.Nazarian@CNMC.org

| Gene ID | p-value | FOLDCHANG106 |  | p-value | FOLDCHANG111 |  | p-value | FOLDCHANG112 |  | p-value | FOLDCHANG121 |  | p-value | FOLDCHANG134 |  | p-value | FOLDCHANG153 |  | p-value | FOLDCHANG166 |  | p-value | FOLDCHANG177 |  | p-value | FOLDCHANG186 |  | p-value | FOLDCHANG195 |  | p-value | FOLDCHANG204 |  | p-value | FOLDCHANG213 |  | p-value | FOLDCHANG222 |  | p-value | FOLDCHANG231 |  | p-value | FOLDCHANG240 |  | p-value | FOLDCHANG249 |  | p-value | FOLDCHANG258 |  | p-value | FOLDCHANG267 |  | p-value | FOLDCHANG276 |  | p-value | FOLDCHANG285 |  | p-value | FOLDCHANG294 |  | p-value | FOLDCHANG303 |  | p-value | FOLDCHANG312 |  | p-value | FOLDCHANG321 |  | p-value | FOLDCHANG330 |  | p-value | FOLDCHANG339 |  | p-value | FOLDCHANG348 |  | p-value | FOLDCHANG357 |  | p-value | FOLDCHANG366 |  | p-value | FOLDCHANG375 |  | p-value | FOLDCHANG384 |  | p-value | FOLDCHANG393 |  | p-value | FOLDCHANG402 |  | p-value | FOLDCHANG411 |  | p-value | FOLDCHANG420 |  | p-value | FOLDCHANG429 |  | p-value | FOLDCHANG438 |  | p-value | FOLDCHANG447 |  | p-value | FOLDCHANG456 |  | p-value | FOLDCHANG465 |  | p-value | FOLDCHANG474 |  | p-value | FOLDCHANG483 |  | p-value | FOLDCHANG492 |  | p-value | FOLDCHANG501 |  | p-value | FOLDCHANG510 |  | p-value | FOLDCHANG519 |  | p-value | FOLDCHANG528 |  | p-value | FOLDCHANG537 |  | p-value | FOLDCHANG546 |  | p-value | FOLDCHANG555 |  | p-value | FOLDCHANG564 |  | p-value | FOLDCHANG573 |  | p-value | FOLDCHANG582 |  | p-value | FOLDCHANG591 |  | p-value | FOLDCHANG600 |  | p-value | FOLDCHANG609 |  | p-value | FOLDCHANG618 |  | p-value | FOLDCHANG627 |  | p-value | FOLDCHANG636 |  | p-value | FOLDCHANG645 |  | p-value | FOLDCHANG654 |  | p-value | FOLDCHANG663 |  | p-value | FOLDCHANG672 |  | p-value | FOLDCHANG681 |  | p-value | FOLDCHANG690 |  | p-value | FOLDCHANG699 |  | p-value | FOLDCHANG708 |  | p-value | FOLDCHANG717 |  | p-value | FOLDCHANG726 |  | p-value | FOLDCHANG735 |  | p-value | FOLDCHANG744 |  | p-value | FOLDCHANG753 |  | p-value | FOLDCHANG762 |  | p-value | FOLDCHANG771 |  | p-value | FOLDCHANG780 |  | p-value | FOLDCHANG789 |  | p-value | FOLDCHANG798 |  | p-value | FOLDCHANG807 |  | p-value | FOLDCHANG816 |  | p-value | FOLDCHANG825 |  | p-value | FOLDCHANG834 |  | p-value | FOLDCHANG843 |  | p-value | FOLDCHANG852 |  | p-value | FOLDCHANG861 |  | p-value | FOLDCHANG870 |  | p-value | FOLDCHANG879 |  | p-value | FOLDCHANG888 |  | p-value | FOLDCHANG897 |  | p-value | FOLDCHANG906 |  | p-value | FOLDCHANG915 |  | p-value | FOLDCHANG924 |  | p-value | FOLDCHANG933 |  | p-value | FOLDCHANG942 |  | p-value | FOLDCHANG951 |  | p-value | FOLDCHANG960 |  | p-value | FOLDCHANG969 |  | p-value | FOLDCHANG978 |  | p-value | FOLDCHANG987 |  | p-value | FOLDCHANG996 |  | p-value | FOLDCHANG1005 |  | p-value | FOLDCHANG1014 |  | p-value | FOLDCHANG1023 |  | p-value | FOLDCHANG1032 |  | p-value | FOLDCHANG1041 |  | p-value | FOLDCHANG1050 |  | p-value | FOLDCHANG1059 |  | p-value | FOLDCHANG1068 |  | p-value | FOLDCHANG1077 |  | p-value | FOLDCHANG1086 |  | p-value | FOLDCHANG1095 |  | p-value | FOLDCHANG1104 |  | p-value | FOLDCHANG1113 |  | p-value | FOLDCHANG1122 |  | p-value | FOLDCHANG1131 |  | p-value | FOLDCHANG1140 |  | p-value | FOLDCHANG1149 |  | p-value | FOLDCHANG1158 |  | p-value | FOLDCHANG1167 |  | p-value | FOLDCHANG1176 |  | p-value | FOLDCHANG1185 |  | p-value | FOLDCHANG1194 |  | p-value | FOLDCHANG1203 |  | p-value | FOLDCHANG1212 |  | p-value | FOLDCHANG1221 |  | p-value | FOLDCHANG1230 |  | p-value | FOLDCHANG1239 |  | p-value | FOLDCHANG1248 |  | p-value | FOLDCHANG1257 |  | p-value | FOLDCHANG1266 |  | p-value | FOLDCHANG1275 |  | p-value | FOLDCHANG1284 |  | p-value | FOLDCHANG1293 |  | p-value | FOLDCHANG1302 |  | p-value | FOLDCHANG1311 |  | p-value | FOLDCHANG1320 |  | p-value | FOLDCHANG1329 |  | p-value | FOLDCHANG1338 |  | p-value | FOLDCHANG1347 |  | p-value | FOLDCHANG1356 |  | p-value | FOLDCHANG1365 |  | p-value | FOLDCHANG1374 |  | p-value | FOLDCHANG1383 |  | p-value | FOLDCHANG1392 |  | p-value | FOLDCHANG1401 |  | p-value | FOLDCHANG1410 |  | p-value | FOLDCHANG1419 |  | p-value | FOLDCHANG1428 |  | p-value | FOLDCHANG1437 |  | p-value | FOLDCHANG1446 |  | p-value | FOLDCHANG1455 |  | p-value | FOLDCHANG1464 |  | p-value | FOLDCHANG1473 |  | p-value | FOLDCHANG1482 |  | p-value | FOLDCHANG1491 |  | p-value | FOLDCHANG1500 |  | p-value | FOLDCHANG1509 |  | p-value | FOLDCHANG1518 |  | p-value | FOLDCHANG1527 |  | p-value | FOLDCHANG1536 |  | p-value | FOLDCHANG1545 |  | p-value | FOLDCHANG1554 |  | p-value | FOLDCHANG1563 |  | p-value | FOLDCHANG1572 |  | p-value | FOLDCHANG1581 |  | p-value | FOLDCHANG1590 |  | p-value | FOLDCHANG1599 |  | p-value | FOLDCHANG1608 |  | p-value | FOLDCHANG1617 |  | p-value | FOLDCHANG1626 |  | p-value | FOLDCHANG1635 |  | p-value | FOLDCHANG1644 |  | p-value | FOLDCHANG1653 |  | p-value | FOLDCHANG1662 |  | p-value | FOLDCHANG1671 |  | p-value | FOLDCHANG1680 |  | p-value | FOLDCHANG1689 |  | p-value | FOLDCHANG1698 |  | p-value | FOLDCHANG1707 |  | p-value | FOLDCHANG1716 |  | p-value | FOLDCHANG1725 |  | p-value | FOLDCHANG1734 |  | p-value | FOLDCHANG1743 |  | p-value | FOLDCHANG1752 |  | p-value | FOLDCHANG1761 |  | p-value | FOLDCHANG1770 |  | p-value | FOLDCHANG1779 |  | p-value | FOLDCHANG1788 |  | p-value | FOLDCHANG1797 |  | p-value | FOLDCHANG1806 |  | p-value | FOLDCHANG1815 |  | p-value | FOLDCHANG1824 |  | p-value | FOLDCHANG1833 |  | p-value | FOLDCHANG1842 |  | p-value | FOLDCHANG1851 |  | p-value | FOLDCHANG1860 |  | p-value | FOLDCHANG1869 |  | p-value | FOLDCHANG1878 |  | p-value | FOLDCHANG1887 |  | p-value | FOLDCHANG1896 |  | p-value | FOLDCHANG1905 |  | p-value | FOLDCHANG1914 |  | p-value | FOLDCHANG1923 |  | p-value | FOLDCHANG1932 |  | p-value | FOLDCHANG1941 |  | p-value | FOLDCHANG1950 |  | p-value | FOLDCHANG1959 |  | p-value | FOLDCHANG1968 |  | p-value | FOLDCHANG1977 |  | p-value | FOLDCHANG1986 |  | p-value | FOLDCHANG1995 |  | p-value | FOLDCHANG2004 |  | p-value | FOLDCHANG2013 |  | p-value | FOLDCHANG2022 |  | p-value | FOLDCHANG2031 |  | p-value | FOLDCHANG2040 |  | p-value | FOLDCHANG2049 |  | p-value | FOLDCHANG2058 |  | p-value | FOLDCHANG2067 |  | p-value | FOLDCHANG2076 |  | p-value | FOLDCHANG2085 |  | p-value | FOLDCHANG2094 |  | p-value | FOLDCHANG2103 |  | p-value | FOLDCHANG2112 |  | p-value | FOLDCHANG2121 |  | p-value | FOLDCHANG2130 |  | p-value | FOLDCHANG2139 |  | p-value | FOLDCHANG2148 |  | p-value | FOLDCHANG2157 |  | p-value | FOLDCHANG2166 |  | p-value | FOLDCHANG2175 |  | p-value | FOLDCHANG2184 |  | p-value | FOLDCHANG2193 |  | p-value | FOLDCHANG2202 |  | p-value | FOLDCHANG2211 |  | p-value | FOLDCHANG2220 |  | p-value | FOLDCHANG2229 |  | p-value | FOLDCHANG2238 |  | p-value | FOLDCHANG2247 |  | p-value | FOLDCHANG2256 |  | p-value | FOLDCHANG2265 |  | p-value | FOLDCHANG2274 |  | p-value | FOLDCHANG2283 |  | p-value | FOLDCHANG2292 |  | p-value | FOLDCHANG2301 |  | p-value | FOLDCHANG2310 |  | p-value | FOLDCHANG2319 |  | p-value | FOLDCHANG2328 |  | p-value | FOLDCHANG2337 |  | p-value | FOLDCHANG2346 |  | p-value | FOLDCHANG2355 |  | p-value | FOLDCHANG2364 |  | p-value | FOLDCHANG2373 |  | p-value | FOLDCHANG2382 |  | p-value | FOLDCHANG2391 |  | p-value | FOLDCHANG2400 |  | p-value | FOLDCHANG2409 |  | p-value | FOLDCHANG2418 |  | p-value | FOLDCHANG2427 |  | p-value | FOLDCHANG2436 |  | p-value | FOLDCHANG2445 |  | p-value | FOLDCHANG2454 |  | p-value | FOLDCHANG2463 |  | p-value | FOLDCHANG2472 |  | p-value | FOLDCHANG2481 |  | p-value | FOLDCHANG2490 |  | p-value | FOLDCHANG2500 |  | p-value | FOLDCHANG2509 |  | p-value | FOLDCHANG2518 |  | p-value | FOLDCHANG2527 |  | p-value | FOLDCHANG2536 |  | p-value | FOLDCHANG2545 |  | p-value | FOLDCHANG2554 |  | p-value | FOLDCHANG2563 |  | p-value | FOLDCHANG2572 |  | p-value | FOLDCHANG2581 |  | p-value | FOLDCHANG2590 |  | p-value | FOLDCHANG2600 |  | p-value | FOLDCHANG2609 |  | p-value | FOLDCHANG2618 |  | p-value | FOLDCHANG2627 |  | p-value | FOLDCHANG2636 |  | p-value | FOLDCHANG2645 |  | p-value | FOLDCHANG2654 |  | p-value | FOLDCHANG2663 |  | p-value | FOLDCHANG2672 |  | p-value | FOLDCHANG2681 |  | p-value | FOLDCHANG2690 |  | p-value | FOLDCHANG2700 |  | p-value | FOLDCHANG2709 |  | p-value | FOLDCHANG2718 |  | p-value | FOLDCHANG2727 |  | p-value | FOLDCHANG2736 |  | p-value | FOLDCHANG2745 |  | p-value | FOLDCHANG2754 |  | p-value | FOLDCHANG2763 |  | p-value | FOLDCHANG2772 |  | p-value | FOLDCHANG2781 |  | p-value | FOLDCHANG2790 |  | p-value | FOLDCHANG2800 |  | p-value | FOLDCHANG2809 |  | p-value | FOLDCHANG2818 |  | p-value | FOLDCHANG2827 |  | p-value | FOLDCHANG2836 |  | p-value | FOLDCHANG2845 |  | p-value | FOLDCHANG2854 |  | p-value | FOLDCHANG2863 |  | p-value | FOLDCHANG2872 |  | p-value | FOLDCHANG2881 |  | p-value | FOLDCHANG2890 |  | p-value | FOLDCHANG2900 |  | p-value | FOLDCHANG2909 |  | p-value | FOLDCHANG2918 |  | p-value | FOLDCHANG2927 |  | p-value | FOLDCHANG2936 |  | p-value | FOLDCHANG2945 |  | p-value | FOLDCHANG2954 |  | p-value | FOLDCHANG2963 |  | p-value | FOLDCHANG2972 |  | p-value | FOLDCHANG2981 |  | p-value | FOLDCHANG2990 |  | p-value | FOLDCHANG3000 |  | p-value | FOLDCHANG3009 |  | p-value | FOLDCHANG3018 |  | p-value | FOLDCHANG3027 |  | p-value | FOLDCHANG3036 |  | p-value | FOLDCHANG3045 |  | p-value | FOLDCHANG3054 |  | p-value | FOLDCHANG3063 |  | p-value | FOLDCHANG3072 |  | p-value | FOLDCHANG3081 |  | p-value | FOLDCHANG3090 |  | p-value | FOLDCHANG3100 |  | p-value | FOLDCHANG3109 |  | p-value | FOLDCHANG3118 |  | p-value | FOLDCHANG3127 |  | p-value | FOLDCHANG3136 |  | p-value | FOLDCHANG3145 |  | p-value | FOLDCHANG3154 |  | p-value | FOLDCHANG3163 |  | p-value | FOLDCHANG3172 |  | p-value | FOLDCHANG3181 |  | p-value | FOLDCHANG3190 |  | p-value | FOLDCHANG3200 |  | p-value | FOLDCHANG3209 |  | p-value | FOLDCHANG3218 |  | p-value | FOLDCHANG3227 |  | p-value | FOLDCHANG3236 |  | p-value | FOLDCHANG3245 |  | p-value | FOLDCHANG3254 |  | p-value | FOLDCHANG3263 |  | p-value | FOLDCHANG3272 |  | p-value | FOLDCHANG3281 |  | p-value | FOLDCHANG3290 |  | p-value | FOLDCHANG3300 |  | p-value | FOLDCHANG3309 |  | p-value | FOLDCHANG3318 |  | p-value | FOLDCHANG3327 |  | p-value | FOLDCHANG3336 |  | p-value | FOLDCHANG3345 |  | p-value | FOLDCHANG3354 |  | p-value | FOLDCHANG3363 |  | p-value | FOLDCHANG3372 |  | p-value | FOLDCHANG3381 |  | p-value | FOLDCHANG3390 |  | p-value | FOLDCHANG3400 |  | p-value | FOLDCHANG3409 |  | p-value | FOLDCHANG3418 |  | p-value | FOLDCHANG3427 |  | p-value | FOLDCHANG3436 |  | p-value | FOLDCHANG3445 |  | p-value | FOLDCHANG3454 |  | p-value | FOLDCHANG3463 |  | p-value | FOLDCHANG3472 |  | p-value | FOLDCHANG3481 |  | p-value | FOLDCHANG3490 |  | p-value | FOLDCHANG3500 |  | p-value | FOLDCHANG3509 |  | p-value | FOLDCHANG3518 |  | p-value | FOLDCHANG3527 |  | p-value | FOLDCHANG3536 |  | p-value | FOLDCHANG3545 |  | p-value | FOLDCHANG3554 |  | p-value | FOLDCHANG3563 |  | p-value | FOLDCHANG3572 |  | p-value | FOLDCHANG3581 |  | p-value | FOLDCHANG3590 |  | p-value | FOLDCHANG3600 |  | p-value | FOLDCHANG3609 |  | p-value | FOLDCHANG3618 |  | p-value | FOLDCHANG3627 |  | p-value | FOLDCHANG3636 |  | p-value | FOLDCHANG3645 |  | p-value | FOLDCHANG3654 |  | p-value | FOLDCHANG3663 |  | p-value | FOLDCHANG3672 |  | p-value | FOLDCHANG3681 |  | p-value | FOLDCHANG3690 |  | p-value | FOLDCHANG3700 |  | p-value | FOLDCHANG3709 |  | p-value | FOLDCHANG3718 |  | p-value | FOLDCHANG3727 |  | p-value | FOLDCHANG3736 |  | p-value | FOLDCHANG3745 |  | p-value | FOLDCHANG3754 |  | p-value | FOLDCHANG3763 |  | p-value | FOLDCHANG3772 |  | p-value | FOLDCHANG3781 |  | p-value | FOLDCHANG3790 |  | p-value | FOLDCHANG3800 |  | p-value | FOLDCHANG3809 |  | p-value | FOLDCHANG3818 |  | p-value | FOLDCHANG3827 |  | p-value | FOLDCHANG3836 |  | p-value | FOLDCHANG3845 |  | p-value | FOLDCHANG3854 |  | p-value | FOLDCHANG3863 |  | p-value | FOLDCHANG3872 |  | p-value | FOLDCHANG3881 |  | p-value | FOLDCHANG3890 |  | p-value | FOLDCHANG3900 |  | p-value | FOLDCHANG3909 |  | p-value | FOLDCHANG3918 |  | p-value | FOLDCHANG3927 |  | p-value | FOLDCHANG3936 |  | p-value | FOLDCHANG3945 |  | p-value | FOLDCHANG3954 |  | p-value | FOLDCHANG3963 |  | p-value | FOLDCHANG3972 |  | p-value | FOLDCHANG3981 |  | p-value | FOLDCHANG3990 |  | p-value | FOLDCHANG4000 |  | p-value | FOLDCHANG4009 |  | p-value | FOLDCHANG4018 |  | p-value | FOLDCHANG4027 |  | p-value | FOLDCHANG4036 |  | p-value | FOLDCHANG4045 |  | p-value | FOLDCHANG4054 |  | p-value | FOLDCHANG4063 |  | p-value | FOLDCHANG4072 |  | p-value | FOLDCHANG4081 |  | p-value | FOLDCHANG4090 |  | p-value | FOLDCHANG4100 |  | p-value | FOLDCHANG4109 |  | p-value | FOLDCHANG4118 |  | p-value | FOLDCHANG4127 |  | p-value | FOLDCHANG4136 |  | p-value | FOLDCHANG4145 |  | p-value | FOLDCHANG4154 |  | p-value | FOLDCHANG4163 |  | p-value | FOLDCHANG4172 |  | p-value | FOLDCHANG4181 |  | p-value | FOLDCHANG4190 |  | p-value | FOLDCHANG4200 |  | p-value | FOLDCHANG4209 |  | p-value | FOLDCHANG4218 |  | p-value | FOLDCHANG4227 |  | p-value | FOLDCHANG4236 |  | p-value | FOLDCHANG4245 |  | p-value | FOLDCHANG4254 |  | p-value | FOLDCHANG4263 |  | p-value | FOLDCHANG4272 |  | p-value | FOLDCHANG4281 |  | p-value | FOLDCHANG4290 |  | p-value | FOLDCHANG4300 |  | p-value | FOLDCHANG4309 |  | p-value | FOLDCHANG4318 |  | p-value | FOLDCHANG4327 |  | p-value | FOLDCHANG4336 |  | p-value | FOLDCHANG4345 |  | p-value | FOLDCHANG4354 |  | p-value | FOLDCHANG4363 |  | p-value | FOLDCHANG4372 |  | p-value | FOLDCHANG4381 |  | p-value | FOLDCHANG4390 |  | p-value | FOLDCHANG4400 |  | p-value | FOLDCHANG4409 |  | p-value | FOLDCHANG4418 |  | p-value | FOLDCHANG4427 |  | p-value | FOLDCHANG4436 |  | p-value |  |  |
|---------|---------|--------------|--|---------|--------------|--|---------|--------------|--|---------|--------------|--|---------|--------------|--|---------|--------------|--|---------|--------------|--|---------|--------------|--|---------|--------------|--|---------|--------------|--|---------|--------------|--|---------|--------------|--|---------|--------------|--|---------|--------------|--|---------|--------------|--|---------|--------------|--|---------|--------------|--|---------|--------------|--|---------|--------------|--|---------|--------------|--|---------|--------------|--|---------|--------------|--|---------|--------------|--|---------|--------------|--|---------|--------------|--|---------|--------------|--|---------|--------------|--|---------|--------------|--|---------|--------------|--|---------|--------------|--|---------|--------------|--|---------|--------------|--|---------|--------------|--|---------|--------------|--|---------|--------------|--|---------|--------------|--|---------|--------------|--|---------|--------------|--|---------|--------------|--|---------|--------------|--|---------|--------------|--|---------|--------------|--|---------|--------------|--|---------|--------------|--|---------|--------------|--|---------|--------------|--|---------|--------------|--|---------|--------------|--|---------|--------------|--|---------|--------------|--|---------|--------------|--|---------|--------------|--|---------|--------------|--|---------|--------------|--|---------|--------------|--|---------|--------------|--|---------|--------------|--|---------|--------------|--|---------|--------------|--|---------|--------------|--|---------|--------------|--|---------|--------------|--|---------|--------------|--|---------|--------------|--|---------|--------------|--|---------|--------------|--|---------|--------------|--|---------|--------------|--|---------|--------------|--|---------|--------------|--|---------|--------------|--|---------|--------------|--|---------|--------------|--|---------|--------------|--|---------|--------------|--|---------|--------------|--|---------|--------------|--|---------|--------------|--|---------|--------------|--|---------|--------------|--|---------|--------------|--|---------|--------------|--|---------|--------------|--|---------|--------------|--|---------|--------------|--|---------|--------------|--|---------|--------------|--|---------|--------------|--|---------|--------------|--|---------|--------------|--|---------|--------------|--|---------|--------------|--|---------|--------------|--|---------|--------------|--|---------|--------------|--|---------|--------------|--|---------|--------------|--|---------|--------------|--|---------|--------------|--|---------|---------------|--|---------|---------------|--|---------|---------------|--|---------|---------------|--|---------|---------------|--|---------|---------------|--|---------|---------------|--|---------|---------------|--|---------|---------------|--|---------|---------------|--|---------|---------------|--|---------|---------------|--|---------|---------------|--|---------|---------------|--|---------|---------------|--|---------|---------------|--|---------|---------------|--|---------|---------------|--|---------|---------------|--|---------|---------------|--|---------|---------------|--|---------|---------------|--|---------|---------------|--|---------|---------------|--|---------|---------------|--|---------|---------------|--|---------|---------------|--|---------|---------------|--|---------|---------------|--|---------|---------------|--|---------|---------------|--|---------|---------------|--|---------|---------------|--|---------|---------------|--|---------|---------------|--|---------|---------------|--|---------|---------------|--|---------|---------------|--|---------|---------------|--|---------|---------------|--|---------|---------------|--|---------|---------------|--|---------|---------------|--|---------|---------------|--|---------|---------------|--|---------|---------------|--|---------|---------------|--|---------|---------------|--|---------|---------------|--|---------|---------------|--|---------|---------------|--|---------|---------------|--|---------|---------------|--|---------|---------------|--|---------|---------------|--|---------|---------------|--|---------|---------------|--|---------|---------------|--|---------|---------------|--|---------|---------------|--|---------|---------------|--|---------|---------------|--|---------|---------------|--|---------|---------------|--|---------|---------------|--|---------|---------------|--|---------|---------------|--|---------|---------------|--|---------|---------------|--|---------|---------------|--|---------|---------------|--|---------|---------------|--|---------|---------------|--|---------|---------------|--|---------|---------------|--|---------|---------------|--|---------|---------------|--|---------|---------------|--|---------|---------------|--|---------|---------------|--|---------|---------------|--|---------|---------------|--|---------|---------------|--|---------|---------------|--|---------|---------------|--|---------|---------------|--|---------|---------------|--|---------|---------------|--|---------|---------------|--|---------|---------------|--|---------|---------------|--|---------|---------------|--|---------|---------------|--|---------|---------------|--|---------|---------------|--|---------|---------------|--|---------|---------------|--|---------|---------------|--|---------|---------------|--|---------|---------------|--|---------|---------------|--|---------|---------------|--|---------|---------------|--|---------|---------------|--|---------|---------------|--|---------|---------------|--|---------|---------------|--|---------|---------------|--|---------|---------------|--|---------|---------------|--|---------|---------------|--|---------|---------------|--|---------|---------------|--|---------|---------------|--|---------|---------------|--|---------|---------------|--|---------|---------------|--|---------|---------------|--|---------|---------------|--|---------|---------------|--|---------|---------------|--|---------|---------------|--|---------|---------------|--|---------|---------------|--|---------|---------------|--|---------|---------------|--|---------|---------------|--|---------|---------------|--|---------|---------------|--|---------|---------------|--|---------|---------------|--|---------|---------------|--|---------|---------------|--|---------|---------------|--|---------|---------------|--|---------|---------------|--|---------|---------------|--|---------|---------------|--|---------|---------------|--|---------|---------------|--|---------|---------------|--|---------|---------------|--|---------|---------------|--|---------|---------------|--|---------|---------------|--|---------|---------------|--|---------|---------------|--|---------|---------------|--|---------|---------------|--|---------|---------------|--|---------|---------------|--|---------|---------------|--|---------|---------------|--|---------|---------------|--|---------|---------------|--|---------|---------------|--|---------|---------------|--|---------|---------------|--|---------|---------------|--|---------|---------------|--|---------|---------------|--|---------|---------------|--|---------|---------------|--|---------|---------------|--|---------|---------------|--|---------|---------------|--|---------|---------------|--|---------|---------------|--|---------|---------------|--|---------|---------------|--|---------|---------------|--|---------|---------------|--|---------|---------------|--|---------|---------------|--|---------|---------------|--|---------|---------------|--|---------|---------------|--|---------|---------------|--|---------|---------------|--|---------|---------------|--|---------|---------------|--|---------|---------------|--|---------|---------------|--|---------|---------------|--|---------|---------------|--|---------|---------------|--|---------|---------------|--|---------|---------------|--|---------|---------------|--|---------|---------------|--|---------|---------------|--|---------|---------------|--|---------|---------------|--|---------|---------------|--|---------|---------------|--|---------|---------------|--|---------|---------------|--|---------|---------------|--|---------|---------------|--|---------|---------------|--|---------|---------------|--|---------|---------------|--|---------|---------------|--|---------|---------------|--|---------|---------------|--|---------|---------------|--|---------|---------------|--|---------|---------------|--|---------|---------------|--|---------|---------------|--|---------|---------------|--|---------|---------------|--|---------|---------------|--|---------|---------------|--|---------|---------------|--|---------|---------------|--|---------|---------------|--|---------|---------------|--|---------|---------------|--|---------|---------------|--|---------|---------------|--|---------|---------------|--|---------|---------------|--|---------|---------------|--|---------|---------------|--|---------|---------------|--|---------|---------------|--|---------|---------------|--|---------|---------------|--|---------|---------------|--|---------|---------------|--|---------|---------------|--|---------|---------------|--|---------|---------------|--|---------|---------------|--|---------|---------------|--|---------|---------------|--|---------|---------------|--|---------|---------------|--|---------|---------------|--|---------|---------------|--|---------|---------------|--|---------|---------------|--|---------|---------------|--|---------|---------------|--|---------|---------------|--|---------|---------------|--|---------|---------------|--|---------|---------------|--|---------|---------------|--|---------|---------------|--|---------|---------------|--|---------|---------------|--|---------|---------------|--|---------|---------------|--|---------|---------------|--|---------|---------------|--|---------|---------------|--|---------|---------------|--|---------|---------------|--|---------|---------------|--|---------|---------------|--|---------|---------------|--|---------|---------------|--|---------|---------------|--|---------|---------------|--|---------|---------------|--|---------|---------------|--|---------|---------------|--|---------|---------------|--|---------|---------------|--|---------|---------------|--|---------|---------------|--|---------|---------------|--|---------|---------------|--|---------|---------------|--|---------|---------------|--|---------|---------------|--|---------|---------------|--|---------|---------------|--|---------|---------------|--|---------|---------------|--|---------|---------------|--|---------|---------------|--|---------|---------------|--|---------|---------------|--|---------|---------------|--|---------|---------------|--|---------|---------------|--|---------|---------------|--|---------|---------------|--|---------|---------------|--|---------|---------------|--|---------|---------------|--|---------|---------------|--|---------|---------------|--|---------|---------------|--|---------|---------------|--|---------|---------------|--|---------|---------------|--|---------|---------------|--|---------|---------------|--|---------|---------------|--|---------|---------------|--|---------|---------------|--|---------|---------------|--|---------|---------------|--|---------|---------------|--|---------|---------------|--|---------|---------------|--|---------|---------------|--|---------|---------------|--|---------|---------------|--|---------|---------------|--|---------|---------------|--|---------|---------------|--|---------|---------------|--|---------|---------------|--|---------|---------------|--|---------|---------------|--|---------|---------------|--|---------|---------------|--|---------|---------------|--|---------|---------------|--|---------|---------------|--|---------|---------------|--|---------|---------------|--|---------|---------------|--|---------|---------------|--|---------|---------------|--|---------|---------------|--|---------|---------------|--|---------|---------------|--|---------|---------------|--|---------|---------------|--|---------|---------------|--|---------|---------------|--|---------|---------------|--|---------|---------------|--|---------|---------------|--|---------|---------------|--|---------|---------------|--|---------|---------------|--|---------|---------------|--|---------|---------------|--|---------|---------------|--|---------|---------------|--|---------|---------------|--|---------|---------------|--|---------|---------------|--|---------|---------------|--|---------|---------------|--|---------|---------------|--|---------|---------------|--|---------|---------------|--|---------|---------------|--|---------|---------------|--|---------|---------------|--|---------|---------------|--|---------|---------------|--|---------|---------------|--|---------|---------------|--|---------|---------------|--|---------|---------------|--|---------|---------------|--|---------|---------------|--|---------|---------------|--|---------|---------------|--|---------|---------------|--|---------|---------------|--|---------|---------------|--|---------|---------------|--|---------|---------------|--|---------|---------------|--|---------|---------------|--|---------|---------------|--|---------|---------------|--|---------|---------------|--|---------|---------------|--|---------|---------------|--|---------|--|--|
|---------|---------|--------------|--|---------|--------------|--|---------|--------------|--|---------|--------------|--|---------|--------------|--|---------|--------------|--|---------|--------------|--|---------|--------------|--|---------|--------------|--|---------|--------------|--|---------|--------------|--|---------|--------------|--|---------|--------------|--|---------|--------------|--|---------|--------------|--|---------|--------------|--|---------|--------------|--|---------|--------------|--|---------|--------------|--|---------|--------------|--|---------|--------------|--|---------|--------------|--|---------|--------------|--|---------|--------------|--|---------|--------------|--|---------|--------------|--|---------|--------------|--|---------|--------------|--|---------|--------------|--|---------|--------------|--|---------|--------------|--|---------|--------------|--|---------|--------------|--|---------|--------------|--|---------|--------------|--|---------|--------------|--|---------|--------------|--|---------|--------------|--|---------|--------------|--|---------|--------------|--|---------|--------------|--|---------|--------------|--|---------|--------------|--|---------|--------------|--|---------|--------------|--|---------|--------------|--|---------|--------------|--|---------|--------------|--|---------|--------------|--|---------|--------------|--|---------|--------------|--|---------|--------------|--|---------|--------------|--|---------|--------------|--|---------|--------------|--|---------|--------------|--|---------|--------------|--|---------|--------------|--|---------|--------------|--|---------|--------------|--|---------|--------------|--|---------|--------------|--|---------|--------------|--|---------|--------------|--|---------|--------------|--|---------|--------------|--|---------|--------------|--|---------|--------------|--|---------|--------------|--|---------|--------------|--|---------|--------------|--|---------|--------------|--|---------|--------------|--|---------|--------------|--|---------|--------------|--|---------|--------------|--|---------|--------------|--|---------|--------------|--|---------|--------------|--|---------|--------------|--|---------|--------------|--|---------|--------------|--|---------|--------------|--|---------|--------------|--|---------|--------------|--|---------|--------------|--|---------|--------------|--|---------|--------------|--|---------|--------------|--|---------|--------------|--|---------|--------------|--|---------|--------------|--|---------|--------------|--|---------|--------------|--|---------|--------------|--|---------|--------------|--|---------|--------------|--|---------|--------------|--|---------|--------------|--|---------|---------------|--|---------|---------------|--|---------|---------------|--|---------|---------------|--|---------|---------------|--|---------|---------------|--|---------|---------------|--|---------|---------------|--|---------|---------------|--|---------|---------------|--|---------|---------------|--|---------|---------------|--|---------|---------------|--|---------|---------------|--|---------|---------------|--|---------|---------------|--|---------|---------------|--|---------|---------------|--|---------|---------------|--|---------|---------------|--|---------|---------------|--|---------|---------------|--|---------|---------------|--|---------|---------------|--|---------|---------------|--|---------|---------------|--|---------|---------------|--|---------|---------------|--|---------|---------------|--|---------|---------------|--|---------|---------------|--|---------|---------------|--|---------|---------------|--|---------|---------------|--|---------|---------------|--|---------|---------------|--|---------|---------------|--|---------|---------------|--|---------|---------------|--|---------|---------------|--|---------|---------------|--|---------|---------------|--|---------|---------------|--|---------|---------------|--|---------|---------------|--|---------|---------------|--|---------|---------------|--|---------|---------------|--|---------|---------------|--|---------|---------------|--|---------|---------------|--|---------|---------------|--|---------|---------------|--|---------|---------------|--|---------|---------------|--|---------|---------------|--|---------|---------------|--|---------|---------------|--|---------|---------------|--|---------|---------------|--|---------|---------------|--|---------|---------------|--|---------|---------------|--|---------|---------------|--|---------|---------------|--|---------|---------------|--|---------|---------------|--|---------|---------------|--|---------|---------------|--|---------|---------------|--|---------|---------------|--|---------|---------------|--|---------|---------------|--|---------|---------------|--|---------|---------------|--|---------|---------------|--|---------|---------------|--|---------|---------------|--|---------|---------------|--|---------|---------------|--|---------|---------------|--|---------|---------------|--|---------|---------------|--|---------|---------------|--|---------|---------------|--|---------|---------------|--|---------|---------------|--|---------|---------------|--|---------|---------------|--|---------|---------------|--|---------|---------------|--|---------|---------------|--|---------|---------------|--|---------|---------------|--|---------|---------------|--|---------|---------------|--|---------|---------------|--|---------|---------------|--|---------|---------------|--|---------|---------------|--|---------|---------------|--|---------|---------------|--|---------|---------------|--|---------|---------------|--|---------|---------------|--|---------|---------------|--|---------|---------------|--|---------|---------------|--|---------|---------------|--|---------|---------------|--|---------|---------------|--|---------|---------------|--|---------|---------------|--|---------|---------------|--|---------|---------------|--|---------|---------------|--|---------|---------------|--|---------|---------------|--|---------|---------------|--|---------|---------------|--|---------|---------------|--|---------|---------------|--|---------|---------------|--|---------|---------------|--|---------|---------------|--|---------|---------------|--|---------|---------------|--|---------|---------------|--|---------|---------------|--|---------|---------------|--|---------|---------------|--|---------|---------------|--|---------|---------------|--|---------|---------------|--|---------|---------------|--|---------|---------------|--|---------|---------------|--|---------|---------------|--|---------|---------------|--|---------|---------------|--|---------|---------------|--|---------|---------------|--|---------|---------------|--|---------|---------------|--|---------|---------------|--|---------|---------------|--|---------|---------------|--|---------|---------------|--|---------|---------------|--|---------|---------------|--|---------|---------------|--|---------|---------------|--|---------|---------------|--|---------|---------------|--|---------|---------------|--|---------|---------------|--|---------|---------------|--|---------|---------------|--|---------|---------------|--|---------|---------------|--|---------|---------------|--|---------|---------------|--|---------|---------------|--|---------|---------------|--|---------|---------------|--|---------|---------------|--|---------|---------------|--|---------|---------------|--|---------|---------------|--|---------|---------------|--|---------|---------------|--|---------|---------------|--|---------|---------------|--|---------|---------------|--|---------|---------------|--|---------|---------------|--|---------|---------------|--|---------|---------------|--|---------|---------------|--|---------|---------------|--|---------|---------------|--|---------|---------------|--|---------|---------------|--|---------|---------------|--|---------|---------------|--|---------|---------------|--|---------|---------------|--|---------|---------------|--|---------|---------------|--|---------|---------------|--|---------|---------------|--|---------|---------------|--|---------|---------------|--|---------|---------------|--|---------|---------------|--|---------|---------------|--|---------|---------------|--|---------|---------------|--|---------|---------------|--|---------|---------------|--|---------|---------------|--|---------|---------------|--|---------|---------------|--|---------|---------------|--|---------|---------------|--|---------|---------------|--|---------|---------------|--|---------|---------------|--|---------|---------------|--|---------|---------------|--|---------|---------------|--|---------|---------------|--|---------|---------------|--|---------|---------------|--|---------|---------------|--|---------|---------------|--|---------|---------------|--|---------|---------------|--|---------|---------------|--|---------|---------------|--|---------|---------------|--|---------|---------------|--|---------|---------------|--|---------|---------------|--|---------|---------------|--|---------|---------------|--|---------|---------------|--|---------|---------------|--|---------|---------------|--|---------|---------------|--|---------|---------------|--|---------|---------------|--|---------|---------------|--|---------|---------------|--|---------|---------------|--|---------|---------------|--|---------|---------------|--|---------|---------------|--|---------|---------------|--|---------|---------------|--|---------|---------------|--|---------|---------------|--|---------|---------------|--|---------|---------------|--|---------|---------------|--|---------|---------------|--|---------|---------------|--|---------|---------------|--|---------|---------------|--|---------|---------------|--|---------|---------------|--|---------|---------------|--|---------|---------------|--|---------|---------------|--|---------|---------------|--|---------|---------------|--|---------|---------------|--|---------|---------------|--|---------|---------------|--|---------|---------------|--|---------|---------------|--|---------|---------------|--|---------|---------------|--|---------|---------------|--|---------|---------------|--|---------|---------------|--|---------|---------------|--|---------|---------------|--|---------|---------------|--|---------|---------------|--|---------|---------------|--|---------|---------------|--|---------|---------------|--|---------|---------------|--|---------|---------------|--|---------|---------------|--|---------|---------------|--|---------|---------------|--|---------|---------------|--|---------|---------------|--|---------|---------------|--|---------|---------------|--|---------|---------------|--|---------|---------------|--|---------|---------------|--|---------|---------------|--|---------|---------------|--|---------|---------------|--|---------|---------------|--|---------|---------------|--|---------|---------------|--|---------|---------------|--|---------|---------------|--|---------|---------------|--|---------|---------------|--|---------|---------------|--|---------|---------------|--|---------|---------------|--|---------|---------------|--|---------|---------------|--|---------|---------------|--|---------|---------------|--|---------|---------------|--|---------|---------------|--|---------|---------------|--|---------|---------------|--|---------|---------------|--|---------|---------------|--|---------|---------------|--|---------|---------------|--|---------|---------------|--|---------|---------------|--|---------|---------------|--|---------|---------------|--|---------|---------------|--|---------|---------------|--|---------|---------------|--|---------|---------------|--|---------|---------------|--|---------|---------------|--|---------|---------------|--|---------|---------------|--|---------|---------------|--|---------|---------------|--|---------|---------------|--|---------|---------------|--|---------|---------------|--|---------|---------------|--|---------|---------------|--|---------|---------------|--|---------|---------------|--|---------|---------------|--|---------|---------------|--|---------|---------------|--|---------|---------------|--|---------|---------------|--|---------|---------------|--|---------|---------------|--|---------|---------------|--|---------|---------------|--|---------|---------------|--|---------|---------------|--|---------|---------------|--|---------|---------------|--|---------|---------------|--|---------|---------------|--|---------|---------------|--|---------|---------------|--|---------|---------------|--|---------|---------------|--|---------|---------------|--|---------|---------------|--|---------|---------------|--|---------|---------------|--|---------|---------------|--|---------|---------------|--|---------|---------------|--|---------|---------------|--|---------|---------------|--|---------|---------------|--|---------|---------------|--|---------|---------------|--|---------|---------------|--|---------|---------------|--|---------|---------------|--|---------|---------------|--|---------|---------------|--|---------|---------------|--|---------|---------------|--|---------|---------------|--|---------|---------------|--|---------|---------------|--|---------|---------------|--|---------|---------------|--|---------|---------------|--|---------|---------------|--|---------|---------------|--|---------|---------------|--|---------|---------------|--|---------|---------------|--|---------|--|--|



**Title:** Comparative Multidimensional Molecular Analyses of Pediatric Diffuse Intrinsic Pontine Glioma Reveals Distinct Molecular Subtypes  
**Journal:** Acta Neuropathologica

Javad Nazarian, Children's National Medical Center, Center for Genetic Medicine

Phone: 202-476-6022 Fax: 202-476-6014

|      | value[106] | MeanRatio | FoldChange[ 6 vs. n] |  | value[111] | MeanRatio | FoldChange[ vs. n] |  | value[112] | MeanRatio | FoldChange[ vs. n] |  |
|------|------------|-----------|----------------------|--|------------|-----------|--------------------|--|------------|-----------|--------------------|--|
| 0    | 100        | 1         | 1                    |  | 100        | 1         | 1                  |  | 100        | 1         | 1                  |  |
| 1    | 100        | 1         | 1                    |  | 100        | 1         | 1                  |  | 100        | 1         | 1                  |  |
| 2    | 100        | 1         | 1                    |  | 100        | 1         | 1                  |  | 100        | 1         | 1                  |  |
| 3    | 100        | 1         | 1                    |  | 100        | 1         | 1                  |  | 100        | 1         | 1                  |  |
| 4    | 100        | 1         | 1                    |  | 100        | 1         | 1                  |  | 100        | 1         | 1                  |  |
| 5    | 100        | 1         | 1                    |  | 100        | 1         | 1                  |  | 100        | 1         | 1                  |  |
| 6    | 100        | 1         | 1                    |  | 100        | 1         | 1                  |  | 100        | 1         | 1                  |  |
| 7    | 100        | 1         | 1                    |  | 100        | 1         | 1                  |  | 100        | 1         | 1                  |  |
| 8    | 100        | 1         | 1                    |  | 100        | 1         | 1                  |  | 100        | 1         | 1                  |  |
| 9    | 100        | 1         | 1                    |  | 100        | 1         | 1                  |  | 100        | 1         | 1                  |  |
| 10   | 100        | 1         | 1                    |  | 100        | 1         | 1                  |  | 100        | 1         | 1                  |  |
| 11   | 100        | 1         | 1                    |  | 100        | 1         | 1                  |  | 100        | 1         | 1                  |  |
| 12   | 100        | 1         | 1                    |  | 100        | 1         | 1                  |  | 100        | 1         | 1                  |  |
| 13   | 100        | 1         | 1                    |  | 100        | 1         | 1                  |  | 100        | 1         | 1                  |  |
| 14   | 100        | 1         | 1                    |  | 100        | 1         | 1                  |  | 100        | 1         | 1                  |  |
| 15   | 100        | 1         | 1                    |  | 100        | 1         | 1                  |  | 100        | 1         | 1                  |  |
| 16   | 100        | 1         | 1                    |  | 100        | 1         | 1                  |  | 100        | 1         | 1                  |  |
| 17   | 100        | 1         | 1                    |  | 100        | 1         | 1                  |  | 100        | 1         | 1                  |  |
| 18   | 100        | 1         | 1                    |  | 100        | 1         | 1                  |  | 100        | 1         | 1                  |  |
| 19   | 100        | 1         | 1                    |  | 100        | 1         | 1                  |  | 100        | 1         | 1                  |  |
| 20   | 100        | 1         | 1                    |  | 100        | 1         | 1                  |  | 100        | 1         | 1                  |  |
| 21   | 100        | 1         | 1                    |  | 100        | 1         | 1                  |  | 100        | 1         | 1                  |  |
| 22   | 100        | 1         | 1                    |  | 100        | 1         | 1                  |  | 100        | 1         | 1                  |  |
| 23   | 100        | 1         | 1                    |  | 100        | 1         | 1                  |  | 100        | 1         | 1                  |  |
| 24   | 100        | 1         | 1                    |  | 100        | 1         | 1                  |  | 100        | 1         | 1                  |  |
| 25   | 100        | 1         | 1                    |  | 100        | 1         | 1                  |  | 100        | 1         | 1                  |  |
| 26   | 100        | 1         | 1                    |  | 100        | 1         | 1                  |  | 100        | 1         | 1                  |  |
| 27   | 100        | 1         | 1                    |  | 100        | 1         | 1                  |  | 100        | 1         | 1                  |  |
| 28   | 100        | 1         | 1                    |  | 100        | 1         | 1                  |  | 100        | 1         | 1                  |  |
| 29   | 100        | 1         | 1                    |  | 100        | 1         | 1                  |  | 100        | 1         | 1                  |  |
| 30   | 100        | 1         | 1                    |  | 100        | 1         | 1                  |  | 100        | 1         | 1                  |  |
| 31   | 100        | 1         | 1                    |  | 100        | 1         | 1                  |  | 100        | 1         | 1                  |  |
| 32   | 100        | 1         | 1                    |  | 100        | 1         | 1                  |  | 100        | 1         | 1                  |  |
| 33   | 100        | 1         | 1                    |  | 100        | 1         | 1                  |  | 100        | 1         | 1                  |  |
| 34   | 100        | 1         | 1                    |  | 100        | 1         | 1                  |  | 100        | 1         | 1                  |  |
| 35   | 100        | 1         | 1                    |  | 100        | 1         | 1                  |  | 100        | 1         | 1                  |  |
| 36   | 100        | 1         | 1                    |  | 100        | 1         | 1                  |  | 100        | 1         | 1                  |  |
| 37   | 100        | 1         | 1                    |  | 100        | 1         | 1                  |  | 100        | 1         | 1                  |  |
| 38   | 100        | 1         | 1                    |  | 100        | 1         | 1                  |  | 100        | 1         | 1                  |  |
| 39   | 100        | 1         | 1                    |  | 100        | 1         | 1                  |  | 100        | 1         | 1                  |  |
| 40</ |            |           |                      |  |            |           |                    |  |            |           |                    |  |







File: ESM\_10 (Online Resource 10)

Figure: Comparative Multidimensional Molecular Analyses of Pediatric Diffuse Intrinsic Tumors: Gene Expression Profiles Reveal Distinct Molecular Subtypes  
Journal: Acta Neurochirurgica

Authors: Amanda M. Stransky, Madhuri Kumbhakar, Kendall Snyder, Sidicki Yavuz, Joe Devenney, Brennan Harmon, Jordan Hall, Eric H. Raabe, Ping An, Melanie Weingart, Brian Ross, Sarah Magee, Roger J. Packer, Javad Nazarian

Corresponding Author:

Javad Nazarian, Children's National Medical Center, Center for Genetic Medicine  
111 Michigan Ave., NW, Washington DC, 20010  
Phone: 202-476-0022 Fax: 202-476-0014  
Email: J.Nazarian@CNMC.org

| Gene ID |  | P-value |  | FOLD[106] |  | P-value |  | FOLD[107] |  | P-value |  | FOLD[108] |  | P-value |  | FOLD[109] |  | P-value |  | FOLD[110] |  | P-value |  | FOLD[111] |  | P-value |  | FOLD[112] |  | P-value |  | FOLD[113] |  | P-value |  | FOLD[114] |  | P-value |  | FOLD[115] |  | P-value |  | FOLD[116] |  | P-value |  | FOLD[117] |  | P-value |  | FOLD[118] |  | P-value |  | FOLD[119] |  | P-value |  | FOLD[120] |  | P-value |  | FOLD[121] |  | P-value |  | FOLD[122] |  | P-value |  | FOLD[123] |  | P-value |  | FOLD[124] |  | P-value |  | FOLD[125] |  | P-value |  | FOLD[126] |  | P-value |  | FOLD[127] |  | P-value |  | FOLD[128] |  | P-value |  | FOLD[129] |  | P-value |  | FOLD[130] |  | P-value |  | FOLD[131] |  | P-value |  | FOLD[132] |  | P-value |  | FOLD[133] |  | P-value |  | FOLD[134] |  | P-value |  | FOLD[135] |  | P-value |  | FOLD[136] |  | P-value |  | FOLD[137] |  | P-value |  | FOLD[138] |  | P-value |  | FOLD[139] |  | P-value |  | FOLD[140] |  | P-value |  | FOLD[141] |  | P-value |  | FOLD[142] |  | P-value |  | FOLD[143] |  | P-value |  | FOLD[144] |  | P-value |  | FOLD[145] |  | P-value |  | FOLD[146] |  | P-value |  | FOLD[147] |  | P-value |  | FOLD[148] |  | P-value |  | FOLD[149] |  | P-value |  | FOLD[150] |  | P-value |  | FOLD[151] |  | P-value |  | FOLD[152] |  | P-value |  | FOLD[153] |  | P-value |  | FOLD[154] |  | P-value |  | FOLD[155] |  | P-value |  | FOLD[156] |  | P-value |  | FOLD[157] |  | P-value |  | FOLD[158] |  | P-value |  | FOLD[159] |  | P-value |  | FOLD[160] |  | P-value |  | FOLD[161] |  | P-value |  | FOLD[162] |  | P-value |  | FOLD[163] |  | P-value |  | FOLD[164] |  | P-value |  | FOLD[165] |  | P-value |  | FOLD[166] |  | P-value |  | FOLD[167] |  | P-value |  | FOLD[168] |  | P-value |  | FOLD[169] |  | P-value |  | FOLD[170] |  | P-value |  | FOLD[171] |  | P-value |  | FOLD[172] |  | P-value |  | FOLD[173] |  | P-value |  | FOLD[174] |  | P-value |  | FOLD[175] |  | P-value |  | FOLD[176] |  | P-value |  | FOLD[177] |  | P-value |  | FOLD[178] |  | P-value |  | FOLD[179] |  | P-value |  | FOLD[180] |  | P-value |  | FOLD[181] |  | P-value |  | FOLD[182] |  | P-value |  | FOLD[183] |  | P-value |  | FOLD[184] |  | P-value |  | FOLD[185] |  | P-value |  | FOLD[186] |  | P-value |  | FOLD[187] |  | P-value |  | FOLD[188] |  | P-value |  | FOLD[189] |  | P-value |  | FOLD[190] |  | P-value |  | FOLD[191] |  | P-value |  | FOLD[192] |  | P-value |  | FOLD[193] |  | P-value |  | FOLD[194] |  | P-value |  | FOLD[195] |  | P-value |  | FOLD[196] |  | P-value |  | FOLD[197] |  | P-value |  | FOLD[198] |  | P-value |  | FOLD[199] |  | P-value |  | FOLD[200] |  | P-value |  | FOLD[201] |  | P-value |  | FOLD[202] |  | P-value |  | FOLD[203] |  | P-value |  | FOLD[204] |  | P-value |  | FOLD[205] |  | P-value |  | FOLD[206] |  | P-value |  | FOLD[207] |  | P-value |  | FOLD[208] |  | P-value |  | FOLD[209] |  | P-value |  | FOLD[210] |  | P-value |  | FOLD[211] |  | P-value |  | FOLD[212] |  | P-value |  | FOLD[213] |  | P-value |  | FOLD[214] |  | P-value |  | FOLD[215] |  | P-value |  | FOLD[216] |  | P-value |  | FOLD[217] |  | P-value |  | FOLD[218] |  | P-value |  | FOLD[219] |  | P-value |  | FOLD[220] |  | P-value |  | FOLD[221] |  | P-value |  | FOLD[222] |  | P-value |  | FOLD[223] |  | P-value |  | FOLD[224] |  | P-value |  | FOLD[225] |  | P-value |  | FOLD[226] |  | P-value |  | FOLD[227] |  | P-value |  | FOLD[228] |  | P-value |  | FOLD[229] |  | P-value |  | FOLD[230] |  | P-value |  | FOLD[231] |  | P-value |  | FOLD[232] |  | P-value |  | FOLD[233] |  | P-value |  | FOLD[234] |  | P-value |  | FOLD[235] |  | P-value |  | FOLD[236] |  | P-value |  | FOLD[237] |  | P-value |  | FOLD[238] |  | P-value |  | FOLD[239] |  | P-value |  | FOLD[240] |  | P-value |  | FOLD[241] |  | P-value |  | FOLD[242] |  | P-value |  | FOLD[243] |  | P-value |  | FOLD[244] |  | P-value |  | FOLD[245] |  | P-value |  | FOLD[246] |  | P-value |  | FOLD[247] |  | P-value |  | FOLD[248] |  | P-value |  | FOLD[249] |  | P-value |  | FOLD[250] |  | P-value |  | FOLD[251] |  | P-value |  | FOLD[252] |  | P-value |  | FOLD[253] |  | P-value |  | FOLD[254] |  | P-value |  | FOLD[255] |  | P-value |  | FOLD[256] |  | P-value |  | FOLD[257] |  | P-value |  | FOLD[258] |  | P-value |  | FOLD[259] |  | P-value |  | FOLD[260] |  | P-value |  | FOLD[261] |  | P-value |  | FOLD[262] |  | P-value |  | FOLD[263] |  | P-value |  | FOLD[264] |  | P-value |  | FOLD[265] |  | P-value |  | FOLD[266] |  | P-value |  | FOLD[267] |  | P-value |  | FOLD[268] |  | P-value |  | FOLD[269] |  | P-value |  | FOLD[270] |  | P-value |  | FOLD[271] |  | P-value |  | FOLD[272] |  | P-value |  | FOLD[273] |  | P-value |  | FOLD[274] |  | P-value |  | FOLD[275] |  | P-value |  | FOLD[276] |  | P-value |  | FOLD[277] |  | P-value |  | FOLD[278] |  | P-value |  | FOLD[279] |  | P-value |  | FOLD[280] |  | P-value |  | FOLD[281] |  | P-value |  | FOLD[282] |  | P-value |  | FOLD[283] |  | P-value |  | FOLD[284] |  | P-value |  | FOLD[285] |  | P-value |  | FOLD[286] |  | P-value |  | FOLD[287] |  | P-value |  | FOLD[288] |  | P-value |  | FOLD[289] |  | P-value |  | FOLD[290] |  | P-value |  | FOLD[291] |  | P-value |  | FOLD[292] |  | P-value |  | FOLD[293] |  | P-value |  | FOLD[294] |  | P-value |  | FOLD[295] |  | P-value |  | FOLD[296] |  | P-value |  | FOLD[297] |  | P-value |  | FOLD[298] |  | P-value |  | FOLD[299] |  | P-value |  | FOLD[300] |  | P-value |  | FOLD[301] |  | P-value |  | FOLD[302] |  | P-value |  | FOLD[303] |  | P-value |  | FOLD[304] |  | P-value |  | FOLD[305] |  | P-value |  | FOLD[306] |  | P-value |  | FOLD[307] |  | P-value |  | FOLD[308] |  | P-value |  | FOLD[309] |  | P-value |  | FOLD[310] |  | P-value |  | FOLD[311] |  | P-value |  | FOLD[312] |  | P-value |  | FOLD[313] |  | P-value |  | FOLD[314] |  | P-value |  | FOLD[315] |  | P-value |  | FOLD[316] |  | P-value |  | FOLD[317] |  | P-value |  | FOLD[318] |  | P-value |  | FOLD[319] |  | P-value |  | FOLD[320] |  | P-value |  | FOLD[321] |  | P-value |  | FOLD[322] |  | P-value |  | FOLD[323] |  | P-value |  | FOLD[324] |  | P-value |  | FOLD[325] |  | P-value |  | FOLD[326] |  | P-value |  | FOLD[327] |  | P-value |  | FOLD[328] |  | P-value |  | FOLD[329] |  | P-value |  | FOLD[330] |  | P-value |  | FOLD[331] |  | P-value |  | FOLD[332] |  | P-value |  | FOLD[333] |  | P-value |  | FOLD[334] |  | P-value |  | FOLD[335] |  | P-value |  | FOLD[336] |  | P-value |  | FOLD[337] |  | P-value |  | FOLD[338] |  | P-value |  | FOLD[339] |  | P-value |  | FOLD[340] |  | P-value |  | FOLD[341] |  | P-value |  | FOLD[342] |  | P-value |  | FOLD[343] |  | P-value |  | FOLD[344] |  | P-value |  | FOLD[345] |  | P-value |  | FOLD[346] |  | P-value |  | FOLD[347] |  | P-value |  | FOLD[348] |  | P-value |  | FOLD[349] |  | P-value |  | FOLD[350] |  | P-value |  | FOLD[351] |  | P-value |  | FOLD[352] |  | P-value |  | FOLD[353] |  | P-value |  | FOLD[354] |  | P-value |  | FOLD[355] |  | P-value |  | FOLD[356] |  | P-value |  | FOLD[357] |  | P-value |  | FOLD[358] |  | P-value |  | FOLD[359] |  | P-value |  | FOLD[360] |  | P-value |  | FOLD[361] |  | P-value |  | FOLD[362] |  | P-value |  | FOLD[363] |  | P-value |  | FOLD[364] |  | P-value |  | FOLD[365] |  | P-value |  | FOLD[366] |  | P-value |  | FOLD[367] |  | P-value |  | FOLD[368] |  | P-value |  | FOLD[369] |  | P-value |  | FOLD[370] |  | P-value |  | FOLD[371] |  | P-value |  | FOLD[372] |  | P-value |  | FOLD[373] |  | P-value |  | FOLD[374] |  | P-value |  | FOLD[375] |  | P-value |  | FOLD[376] |  | P-value |  | FOLD[377] |  | P-value |  | FOLD[378] |  | P-value |  | FOLD[379] |  | P-value |  | FOLD[380] |  | P-value |  | FOLD[381] |  | P-value |  | FOLD[382] |  | P-value |  | FOLD[383] |  | P-value |  | FOLD[384] |  | P-value |  | FOLD[385] |  | P-value |  | FOLD[386] |  | P-value |  | FOLD[387] |  | P-value |  | FOLD[388] |  | P-value |  | FOLD[389] |  | P-value |  | FOLD[390] |  | P-value |  | FOLD[391] |  | P-value |  | FOLD[392] |  | P-value |  | FOLD[393] |  | P-value |  | FOLD[394] |  | P-value |  | FOLD[395] |  | P-value |  | FOLD[396] |  | P-value |  | FOLD[397] |  | P-value |  | FOLD[398] |  | P-value |  | FOLD[399] |  | P-value |  | FOLD[400] |  | P-value |  | FOLD[401] |  | P-value |  | FOLD[402] |  | P-value |  | FOLD[403] |  | P-value |  | FOLD[404] |  | P-value |  | FOLD[405] |  | P-value |  | FOLD[406] |  | P-value |  | FOLD[407] |  | P-value |  | FOLD[408] |  | P-value |  | FOLD[409] |  | P-value |  | FOLD[410] |  | P-value |  | FOLD[411] |  | P-value |  | FOLD[412] |  | P-value |  | FOLD[413] |  | P-value |  | FOLD[414] |  | P-value |  | FOLD[415] |  | P-value |  | FOLD[416] |  | P-value |  | FOLD[417] |  | P-value |  | FOLD[418] |  | P-value |  | FOLD[419] |  | P-value |  | FOLD[420] |  | P-value |  | FOLD[421] |  | P-value |  | FOLD[422] |  | P-value |  | FOLD[423] |  | P-value |  | FOLD[424] |  | P-value |  | FOLD[425] |  | P-value |  | FOLD[426] |  | P-value |  | FOLD[427] |  | P-value |  | FOLD[428] |  | P-value |  | FOLD[429] |  | P-value |  | FOLD[430] |  | P-value |  | FOLD[431] |  | P-value |  | FOLD[432] |  | P-value |  | FOLD[433] |  | P-value |  | FOLD[434] |  | P-value |  | FOLD[435] |  | P-value |  | FOLD[436] |  | P-value |  | FOLD[437] |  | P-value |  | FOLD[438] |  | P-value |  | FOLD[439] |  | P-value |  | FOLD[440] |  | P-value |  | FOLD[441] |  | P-value |  | FOLD[442] |  | P-value |  | FOLD[443] |  | P-value |  | FOLD[444] |  | P-value |  | FOLD[445] |  | P-value |  | FOLD[446] |  | P-value |  | FOLD[447] |  | P-value |  | FOLD[448] |  | P-value |  | FOLD[449] |  | P-value |  | FOLD[450] |  | P-value |  | FOLD[451] |  | P-value |  | FOLD[452] |  | P-value |  | FOLD[453] |  | P-value |  | FOLD[454] |  | P-value |  | FOLD[455] |  | P-value |  | FOLD[456] |  | P-value |  | FOLD[457] |  | P-value |  | FOLD[458] |  | P-value |  | FOLD[459] |  | P-value |  | FOLD[460] |  | P-value |  | FOLD[461] |  | P-value |  | FOLD[462] |  | P-value |  | FOLD[463] |  | P-value |  | FOLD[464] |  | P-value |  | FOLD[465] |  | P-value |  | FOLD[466] |  | P-value |  | FOLD[467] |  | P-value |  | FOLD[468] |  | P-value |  | FOLD[469] |  | P-value |  | FOLD[470] |  | P-value |  | FOLD[471] |  | P-value |  | FOLD[472] |  | P-value |  | FOLD[473] |  | P-value |  | FOLD[474] |  | P-value |  | FOLD[475] |  | P-value |  | FOLD[476] |  | P-value |  | FOLD[477] |  | P-value |  | FOLD[478] |  | P-value |  | FOLD[479] |  | P-value |  | FOLD[480] |  | P-value |  | FOLD[481] |  | P-value |  | FOLD[482] |  | P-value |  | FOLD[483] |  | P-value |  | FOLD[484] |  | P-value |  | FOLD[485] |  | P-value |  | FOLD[486] |  | P-value |  | FOLD[487] |  | P-value |  | FOLD[488] |  | P-value |  | FOLD[489] |  | P-value |  | FOLD[490] |  | P-value |  | FOLD[491] |  | P-value |  | FOLD[492] |  | P-value |  | FOLD[493] |  | P-value |  | FOLD[494] |  | P-value |  | FOLD[495] |  | P-value |  | FOLD[496] |  | P-value |  | FOLD[497] |  | P-value |  | FOLD[498] |  | P-value |  | FOLD[499] |  | P-value |  | FOLD[500] |  | P-value |  | FOLD[501] |  | P-value |  | FOLD[502] |  | P-value |  | FOLD[503] |  | P-value |  | FOLD[504] |  | P-value |  | FOLD[505] |  | P-value |  | FOLD[506] |  | P-value |  | FOLD[507] |  | P-value |  | FOLD[508] |  | P-value |  | FOLD[509] |  | P-value |  | FOLD[510] |  | P-value |  | FOLD[511] |  | P-value |  | FOLD[512] |  | P-value |  | FOLD[513] |  | P-value |  | FOLD[514] |  | P-value |  | FOLD[515] |  | P-value |  | FOLD[516] |  | P-value |  | FOLD[517] |  | P-value |  | FOLD[518] |  | P-value |  | FOLD[519] |  | P-value |  | FOLD[520] |  | P-value |  | FOLD[521] |  | P-value |  | FOLD[522] |  | P-value |  | FOLD[523] |  | P-value |  | FOLD[524] |  | P-value |  | FOLD[525] |  | P-value |  | FOLD[526] |  | P-value |  | FOLD[527] |  | P-value |  | FOLD[528] |  | P-value |  | FOLD[529] |  | P-value |  | FOLD[530] |  | P-value |  | FOLD[531] |  | P-value |  | FOLD[532] |  | P-value |  | FOLD[533] |  | P-value |  | FOLD[534] |  | P-value |  | FOLD[535] |  | P-value |  | FOLD[536] |  | P-value |  | FOLD[537] |  | P-value |  | FOLD[538] |  | P-value |  | FOLD[539] |  | P-value |  | FOLD[540] |  | P-value |  | FOLD[541] |  | P-value |  | FOLD[542] |  | P-value |  | FOLD[543] |  | P-value |  | FOLD[544] |  | P-value |  | FOLD[545] |  | P-value |  | FOLD[546] |  | P-value |  | FOLD[547] |  | P-value |  | FOLD[548] |  | P-value |  | FOLD[549] |  | P-value |  | FOLD[550] |  | P-value |  | FOLD[551] |  | P-value |  | FOLD[552] |  | P-value |  | FOLD[553] |  | P-value |  | FOLD[554] |  | P-value |  | FOLD[555] |  | P-value |  | FOLD[556] |  | P-value |  | FOLD[557] |  | P-value |  | FOLD[558] |  | P-value |  | FOLD[559] |  | P-value |  | FOLD[560] |  | P-value |  | FOLD[561] |  | P-value |  | FOLD[562] |  | P-value |  | FOLD[563] |  | P-value |  | FOLD[564] |  | P-value |  | FOLD[565] |  | P-value |  | FOLD[566] |  | P-value |  | FOLD[567] |  | P-value |  | FOLD[568] |  | P-value |  | FOLD[569] |  | P-value |  | FOLD[570] |  | P-value |  | FOLD[571] |  | P-value |  | FOLD[572] |  | P-value |  | FOLD[573] |  | P-value |  | FOLD[574] |  | P-value |  | FOLD[575] |  | P-value |  | FOLD[576] |  | P-value |  | FOLD[577] |  | P-value |  | FOLD[578] |  | P-value |  | FOLD[579] |  | P-value |  | FOLD[580] |  | P-value |  | FOLD[581] |  | P-value |  | FOLD[582] |  | P-value |  | FOLD[583] |  | P-value |  | FOLD[584] |  | P-value |  | FOLD[585] |  | P-value |  | FOLD[586] |  | P-value |  | FOLD[587] |  | P-value |  | FOLD[588] |  | P-value |  | FOLD[589] |  | P-value |  | FOLD[590] |  | P-value |  | FOLD[591] |  | P-value |  | FOLD[592] |  | P-value |  | FOLD[593] |  | P-value |  | FOLD[594] |  | P-value |  | FOLD[595] |  | P-value |  | FOLD[596] |  | P-value |  | FOLD[597] |  | P-value |  | FOLD[598] |  | P-value |  | FOLD[599] |  | P-value |  | FOLD[600] |  | P-value |  | FOLD[601] |  | P-value |  | FOLD[602] |  | P-value |  | FOLD[603] |  | P-value |  | FOLD[604] |  | P-value |  | FOLD[605] |  | P-value |  | FOLD[606] |  | P-value |  | FOLD[607] |  | P-value |  | FOLD[608] |  | P-value |  | FOLD[609] |  | P-value |  | FOLD[610] |  | P-value |  | FOLD[611] |  | P-value |  | FOLD[612] |  | P-value |  | FOLD[613] |  | P-value |  | FOLD[614] |  | P-value |  | FOLD[615] |  | P-value |  | FOLD[616] |  | P-value |  | FOLD[617] |  | P-value |  | FOLD[618] |  | P-value |  | FOLD[619] |  | P-value |  | FOLD[620] |  | P-value |  |
|---------|--|---------|--|-----------|--|---------|--|-----------|--|---------|--|-----------|--|---------|--|-----------|--|---------|--|-----------|--|---------|--|-----------|--|---------|--|-----------|--|---------|--|-----------|--|---------|--|-----------|--|---------|--|-----------|--|---------|--|-----------|--|---------|--|-----------|--|---------|--|-----------|--|---------|--|-----------|--|---------|--|-----------|--|---------|--|-----------|--|---------|--|-----------|--|---------|--|-----------|--|---------|--|-----------|--|---------|--|-----------|--|---------|--|-----------|--|---------|--|-----------|--|---------|--|-----------|--|---------|--|-----------|--|---------|--|-----------|--|---------|--|-----------|--|---------|--|-----------|--|---------|--|-----------|--|---------|--|-----------|--|---------|--|-----------|--|---------|--|-----------|--|---------|--|-----------|--|---------|--|-----------|--|---------|--|-----------|--|---------|--|-----------|--|---------|--|-----------|--|---------|--|-----------|--|---------|--|-----------|--|---------|--|-----------|--|---------|--|-----------|--|---------|--|-----------|--|---------|--|-----------|--|---------|--|-----------|--|---------|--|-----------|--|---------|--|-----------|--|---------|--|-----------|--|---------|--|-----------|--|---------|--|-----------|--|---------|--|-----------|--|---------|--|-----------|--|---------|--|-----------|--|---------|--|-----------|--|---------|--|-----------|--|---------|--|-----------|--|---------|--|-----------|--|---------|--|-----------|--|---------|--|-----------|--|---------|--|-----------|--|---------|--|-----------|--|---------|--|-----------|--|---------|--|-----------|--|---------|--|-----------|--|---------|--|-----------|--|---------|--|-----------|--|---------|--|-----------|--|---------|--|-----------|--|---------|--|-----------|--|---------|--|-----------|--|---------|--|-----------|--|---------|--|-----------|--|---------|--|-----------|--|---------|--|-----------|--|---------|--|-----------|--|---------|--|-----------|--|---------|--|-----------|--|---------|--|-----------|--|---------|--|-----------|--|---------|--|-----------|--|---------|--|-----------|--|---------|--|-----------|--|---------|--|-----------|--|---------|--|-----------|--|---------|--|-----------|--|---------|--|-----------|--|---------|--|-----------|--|---------|--|-----------|--|---------|--|-----------|--|---------|--|-----------|--|---------|--|-----------|--|---------|--|-----------|--|---------|--|-----------|--|---------|--|-----------|--|---------|--|-----------|--|---------|--|-----------|--|---------|--|-----------|--|---------|--|-----------|--|---------|--|-----------|--|---------|--|-----------|--|---------|--|-----------|--|---------|--|-----------|--|---------|--|-----------|--|---------|--|-----------|--|---------|--|-----------|--|---------|--|-----------|--|---------|--|-----------|--|---------|--|-----------|--|---------|--|-----------|--|---------|--|-----------|--|---------|--|-----------|--|---------|--|-----------|--|---------|--|-----------|--|---------|--|-----------|--|---------|--|-----------|--|---------|--|-----------|--|---------|--|-----------|--|---------|--|-----------|--|---------|--|-----------|--|---------|--|-----------|--|---------|--|-----------|--|---------|--|-----------|--|---------|--|-----------|--|---------|--|-----------|--|---------|--|-----------|--|---------|--|-----------|--|---------|--|-----------|--|---------|--|-----------|--|---------|--|-----------|--|---------|--|-----------|--|---------|--|-----------|--|---------|--|-----------|--|---------|--|-----------|--|---------|--|-----------|--|---------|--|-----------|--|---------|--|-----------|--|---------|--|-----------|--|---------|--|-----------|--|---------|--|-----------|--|---------|--|-----------|--|---------|--|-----------|--|---------|--|-----------|--|---------|--|-----------|--|---------|--|-----------|--|---------|--|-----------|--|---------|--|-----------|--|---------|--|-----------|--|---------|--|-----------|--|---------|--|-----------|--|---------|--|-----------|--|---------|--|-----------|--|---------|--|-----------|--|---------|--|-----------|--|---------|--|-----------|--|---------|--|-----------|--|---------|--|-----------|--|---------|--|-----------|--|---------|--|-----------|--|---------|--|-----------|--|---------|--|-----------|--|---------|--|-----------|--|---------|--|-----------|--|---------|--|-----------|--|---------|--|-----------|--|---------|--|-----------|--|---------|--|-----------|--|---------|--|-----------|--|---------|--|-----------|--|---------|--|-----------|--|---------|--|-----------|--|---------|--|-----------|--|---------|--|-----------|--|---------|--|-----------|--|---------|--|-----------|--|---------|--|-----------|--|---------|--|-----------|--|---------|--|-----------|--|---------|--|-----------|--|---------|--|-----------|--|---------|--|-----------|--|---------|--|-----------|--|---------|--|-----------|--|---------|--|-----------|--|---------|--|-----------|--|---------|--|-----------|--|---------|--|-----------|--|---------|--|-----------|--|---------|--|-----------|--|---------|--|-----------|--|---------|--|-----------|--|---------|--|-----------|--|---------|--|-----------|--|---------|--|-----------|--|---------|--|-----------|--|---------|--|-----------|--|---------|--|-----------|--|---------|--|-----------|--|---------|--|-----------|--|---------|--|-----------|--|---------|--|-----------|--|---------|--|-----------|--|---------|--|-----------|--|---------|--|-----------|--|---------|--|-----------|--|---------|--|-----------|--|---------|--|-----------|--|---------|--|-----------|--|---------|--|-----------|--|---------|--|-----------|--|---------|--|-----------|--|---------|--|-----------|--|---------|--|-----------|--|---------|--|-----------|--|---------|--|-----------|--|---------|--|-----------|--|---------|--|-----------|--|---------|--|-----------|--|---------|--|-----------|--|---------|--|-----------|--|---------|--|-----------|--|---------|--|-----------|--|---------|--|-----------|--|---------|--|-----------|--|---------|--|-----------|--|---------|--|-----------|--|---------|--|-----------|--|---------|--|-----------|--|---------|--|-----------|--|---------|--|-----------|--|---------|--|-----------|--|---------|--|-----------|--|---------|--|-----------|--|---------|--|-----------|--|---------|--|-----------|--|---------|--|-----------|--|---------|--|-----------|--|---------|--|-----------|--|---------|--|-----------|--|---------|--|-----------|--|---------|--|-----------|--|---------|--|-----------|--|---------|--|-----------|--|---------|--|-----------|--|---------|--|-----------|--|---------|--|-----------|--|---------|--|-----------|--|---------|--|-----------|--|---------|--|-----------|--|---------|--|-----------|--|---------|--|-----------|--|---------|--|-----------|--|---------|--|-----------|--|---------|--|-----------|--|---------|--|-----------|--|---------|--|-----------|--|---------|--|-----------|--|---------|--|-----------|--|---------|--|-----------|--|---------|--|-----------|--|---------|--|-----------|--|---------|--|-----------|--|---------|--|-----------|--|---------|--|-----------|--|---------|--|-----------|--|---------|--|-----------|--|---------|--|-----------|--|---------|--|-----------|--|---------|--|-----------|--|---------|--|-----------|--|---------|--|-----------|--|---------|--|-----------|--|---------|--|-----------|--|---------|--|-----------|--|---------|--|-----------|--|---------|--|-----------|--|---------|--|-----------|--|---------|--|-----------|--|---------|--|-----------|--|---------|--|-----------|--|---------|--|-----------|--|---------|--|-----------|--|---------|--|-----------|--|---------|--|-----------|--|---------|--|-----------|--|---------|--|-----------|--|---------|--|-----------|--|---------|--|-----------|--|---------|--|-----------|--|---------|--|-----------|--|---------|--|-----------|--|---------|--|-----------|--|---------|--|-----------|--|---------|--|-----------|--|---------|--|-----------|--|---------|--|-----------|--|---------|--|-----------|--|---------|--|-----------|--|---------|--|-----------|--|---------|--|-----------|--|---------|--|-----------|--|---------|--|-----------|--|---------|--|-----------|--|---------|--|-----------|--|---------|--|-----------|--|---------|--|-----------|--|---------|--|-----------|--|---------|--|-----------|--|---------|--|-----------|--|---------|--|-----------|--|---------|--|-----------|--|---------|--|-----------|--|---------|--|-----------|--|---------|--|-----------|--|---------|--|-----------|--|---------|--|-----------|--|---------|--|-----------|--|---------|--|-----------|--|---------|--|-----------|--|---------|--|-----------|--|---------|--|-----------|--|---------|--|-----------|--|---------|--|-----------|--|---------|--|-----------|--|---------|--|-----------|--|---------|--|-----------|--|---------|--|-----------|--|---------|--|-----------|--|---------|--|-----------|--|---------|--|-----------|--|---------|--|-----------|--|---------|--|-----------|--|---------|--|-----------|--|---------|--|-----------|--|---------|--|-----------|--|---------|--|-----------|--|---------|--|-----------|--|---------|--|-----------|--|---------|--|-----------|--|---------|--|-----------|--|---------|--|-----------|--|---------|--|-----------|--|---------|--|-----------|--|---------|--|-----------|--|---------|--|-----------|--|---------|--|-----------|--|---------|--|-----------|--|---------|--|-----------|--|---------|--|-----------|--|---------|--|-----------|--|---------|--|-----------|--|---------|--|-----------|--|---------|--|-----------|--|---------|--|-----------|--|---------|--|-----------|--|---------|--|-----------|--|---------|--|-----------|--|---------|--|-----------|--|---------|--|-----------|--|---------|--|-----------|--|---------|--|-----------|--|---------|--|-----------|--|---------|--|-----------|--|---------|--|-----------|--|---------|--|-----------|--|---------|--|-----------|--|---------|--|-----------|--|---------|--|-----------|--|---------|--|-----------|--|---------|--|-----------|--|---------|--|-----------|--|---------|--|-----------|--|---------|--|-----------|--|---------|--|-----------|--|---------|--|-----------|--|---------|--|-----------|--|---------|--|-----------|--|---------|--|-----------|--|---------|--|-----------|--|---------|--|-----------|--|---------|--|-----------|--|---------|--|-----------|--|---------|--|-----------|--|---------|--|-----------|--|---------|--|-----------|--|---------|--|-----------|--|---------|--|-----------|--|---------|--|-----------|--|---------|--|-----------|--|---------|--|-----------|--|---------|--|-----------|--|---------|--|-----------|--|---------|--|-----------|--|---------|--|-----------|--|---------|--|-----------|--|---------|--|-----------|--|---------|--|-----------|--|---------|--|-----------|--|---------|--|-----------|--|---------|--|-----------|--|---------|--|-----------|--|---------|--|-----------|--|---------|--|-----------|--|---------|--|-----------|--|---------|--|-----------|--|---------|--|-----------|--|---------|--|-----------|--|---------|--|-----------|--|---------|--|-----------|--|---------|--|-----------|--|---------|--|-----------|--|---------|--|-----------|--|---------|--|-----------|--|---------|--|-----------|--|---------|--|-----------|--|---------|--|-----------|--|---------|--|-----------|--|---------|--|-----------|--|---------|--|-----------|--|---------|--|-----------|--|---------|--|-----------|--|---------|--|-----------|--|---------|--|-----------|--|---------|--|-----------|--|---------|--|-----------|--|---------|--|-----------|--|---------|--|-----------|--|---------|--|-----------|--|---------|--|-----------|--|---------|--|-----------|--|---------|--|-----------|--|---------|--|-----------|--|---------|--|-----------|--|---------|--|-----------|--|---------|--|-----------|--|---------|--|-----------|--|---------|--|-----------|--|---------|--|-----------|--|---------|--|-----------|--|---------|--|-----------|--|---------|--|-----------|--|---------|--|-----------|--|---------|--|-----------|--|---------|--|-----------|--|---------|--|-----------|--|---------|--|-----------|--|---------|--|-----------|--|---------|--|-----------|--|---------|--|-----------|--|---------|--|-----------|--|---------|--|-----------|--|---------|--|-----------|--|---------|--|-----------|--|---------|--|-----------|--|---------|--|-----------|--|---------|--|-----------|--|---------|--|-----------|--|---------|--|-----------|--|---------|--|-----------|--|---------|--|-----------|--|---------|--|-----------|--|---------|--|-----------|--|---------|--|-----------|--|---------|--|-----------|--|---------|--|-----------|--|---------|--|-----------|--|---------|--|-----------|--|---------|--|-----------|--|---------|--|-----------|--|---------|--|-----------|--|---------|--|-----------|--|---------|--|-----------|--|---------|--|-----------|--|---------|--|-----------|--|---------|--|-----------|--|---------|--|-----------|--|---------|--|-----------|--|---------|--|-----------|--|---------|--|-----------|--|---------|--|-----------|--|---------|--|-----------|--|---------|--|-----------|--|---------|--|-----------|--|---------|--|-----------|--|---------|--|-----------|--|---------|--|-----------|--|---------|--|-----------|--|---------|--|-----------|--|---------|--|-----------|--|---------|--|-----------|--|---------|--|-----------|--|---------|--|-----------|--|---------|--|-----------|--|---------|--|-----------|--|---------|--|-----------|--|---------|--|-----------|--|---------|--|-----------|--|---------|--|-----------|--|---------|--|-----------|--|---------|--|-----------|--|---------|--|-----------|--|---------|--|-----------|--|---------|--|-----------|--|---------|--|-----------|--|---------|--|-----------|--|---------|--|-----------|--|---------|--|-----------|--|---------|--|-----------|--|---------|--|-----------|--|---------|--|-----------|--|---------|--|-----------|--|---------|--|-----------|--|---------|--|-----------|--|---------|--|-----------|--|---------|--|-----------|--|---------|--|-----------|--|---------|--|-----------|--|---------|--|-----------|--|---------|--|
|---------|--|---------|--|-----------|--|---------|--|-----------|--|---------|--|-----------|--|---------|--|-----------|--|---------|--|-----------|--|---------|--|-----------|--|---------|--|-----------|--|---------|--|-----------|--|---------|--|-----------|--|---------|--|-----------|--|---------|--|-----------|--|---------|--|-----------|--|---------|--|-----------|--|---------|--|-----------|--|---------|--|-----------|--|---------|--|-----------|--|---------|--|-----------|--|---------|--|-----------|--|---------|--|-----------|--|---------|--|-----------|--|---------|--|-----------|--|---------|--|-----------|--|---------|--|-----------|--|---------|--|-----------|--|---------|--|-----------|--|---------|--|-----------|--|---------|--|-----------|--|---------|--|-----------|--|---------|--|-----------|--|---------|--|-----------|--|---------|--|-----------|--|---------|--|-----------|--|---------|--|-----------|--|---------|--|-----------|--|---------|--|-----------|--|---------|--|-----------|--|---------|--|-----------|--|---------|--|-----------|--|---------|--|-----------|--|---------|--|-----------|--|---------|--|-----------|--|---------|--|-----------|--|---------|--|-----------|--|---------|--|-----------|--|---------|--|-----------|--|---------|--|-----------|--|---------|--|-----------|--|---------|--|-----------|--|---------|--|-----------|--|---------|--|-----------|--|---------|--|-----------|--|---------|--|-----------|--|---------|--|-----------|--|---------|--|-----------|--|---------|--|-----------|--|---------|--|-----------|--|---------|--|-----------|--|---------|--|-----------|--|---------|--|-----------|--|---------|--|-----------|--|---------|--|-----------|--|---------|--|-----------|--|---------|--|-----------|--|---------|--|-----------|--|---------|--|-----------|--|---------|--|-----------|--|---------|--|-----------|--|---------|--|-----------|--|---------|--|-----------|--|---------|--|-----------|--|---------|--|-----------|--|---------|--|-----------|--|---------|--|-----------|--|---------|--|-----------|--|---------|--|-----------|--|---------|--|-----------|--|---------|--|-----------|--|---------|--|-----------|--|---------|--|-----------|--|---------|--|-----------|--|---------|--|-----------|--|---------|--|-----------|--|---------|--|-----------|--|---------|--|-----------|--|---------|--|-----------|--|---------|--|-----------|--|---------|--|-----------|--|---------|--|-----------|--|---------|--|-----------|--|---------|--|-----------|--|---------|--|-----------|--|---------|--|-----------|--|---------|--|-----------|--|---------|--|-----------|--|---------|--|-----------|--|---------|--|-----------|--|---------|--|-----------|--|---------|--|-----------|--|---------|--|-----------|--|---------|--|-----------|--|---------|--|-----------|--|---------|--|-----------|--|---------|--|-----------|--|---------|--|-----------|--|---------|--|-----------|--|---------|--|-----------|--|---------|--|-----------|--|---------|--|-----------|--|---------|--|-----------|--|---------|--|-----------|--|---------|--|-----------|--|---------|--|-----------|--|---------|--|-----------|--|---------|--|-----------|--|---------|--|-----------|--|---------|--|-----------|--|---------|--|-----------|--|---------|--|-----------|--|---------|--|-----------|--|---------|--|-----------|--|---------|--|-----------|--|---------|--|-----------|--|---------|--|-----------|--|---------|--|-----------|--|---------|--|-----------|--|---------|--|-----------|--|---------|--|-----------|--|---------|--|-----------|--|---------|--|-----------|--|---------|--|-----------|--|---------|--|-----------|--|---------|--|-----------|--|---------|--|-----------|--|---------|--|-----------|--|---------|--|-----------|--|---------|--|-----------|--|---------|--|-----------|--|---------|--|-----------|--|---------|--|-----------|--|---------|--|-----------|--|---------|--|-----------|--|---------|--|-----------|--|---------|--|-----------|--|---------|--|-----------|--|---------|--|-----------|--|---------|--|-----------|--|---------|--|-----------|--|---------|--|-----------|--|---------|--|-----------|--|---------|--|-----------|--|---------|--|-----------|--|---------|--|-----------|--|---------|--|-----------|--|---------|--|-----------|--|---------|--|-----------|--|---------|--|-----------|--|---------|--|-----------|--|---------|--|-----------|--|---------|--|-----------|--|---------|--|-----------|--|---------|--|-----------|--|---------|--|-----------|--|---------|--|-----------|--|---------|--|-----------|--|---------|--|-----------|--|---------|--|-----------|--|---------|--|-----------|--|---------|--|-----------|--|---------|--|-----------|--|---------|--|-----------|--|---------|--|-----------|--|---------|--|-----------|--|---------|--|-----------|--|---------|--|-----------|--|---------|--|-----------|--|---------|--|-----------|--|---------|--|-----------|--|---------|--|-----------|--|---------|--|-----------|--|---------|--|-----------|--|---------|--|-----------|--|---------|--|-----------|--|---------|--|-----------|--|---------|--|-----------|--|---------|--|-----------|--|---------|--|-----------|--|---------|--|-----------|--|---------|--|-----------|--|---------|--|-----------|--|---------|--|-----------|--|---------|--|-----------|--|---------|--|-----------|--|---------|--|-----------|--|---------|--|-----------|--|---------|--|-----------|--|---------|--|-----------|--|---------|--|-----------|--|---------|--|-----------|--|---------|--|-----------|--|---------|--|-----------|--|---------|--|-----------|--|---------|--|-----------|--|---------|--|-----------|--|---------|--|-----------|--|---------|--|-----------|--|---------|--|-----------|--|---------|--|-----------|--|---------|--|-----------|--|---------|--|-----------|--|---------|--|-----------|--|---------|--|-----------|--|---------|--|-----------|--|---------|--|-----------|--|---------|--|-----------|--|---------|--|-----------|--|---------|--|-----------|--|---------|--|-----------|--|---------|--|-----------|--|---------|--|-----------|--|---------|--|-----------|--|---------|--|-----------|--|---------|--|-----------|--|---------|--|-----------|--|---------|--|-----------|--|---------|--|-----------|--|---------|--|-----------|--|---------|--|-----------|--|---------|--|-----------|--|---------|--|-----------|--|---------|--|-----------|--|---------|--|-----------|--|---------|--|-----------|--|---------|--|-----------|--|---------|--|-----------|--|---------|--|-----------|--|---------|--|-----------|--|---------|--|-----------|--|---------|--|-----------|--|---------|--|-----------|--|---------|--|-----------|--|---------|--|-----------|--|---------|--|-----------|--|---------|--|-----------|--|---------|--|-----------|--|---------|--|-----------|--|---------|--|-----------|--|---------|--|-----------|--|---------|--|-----------|--|---------|--|-----------|--|---------|--|-----------|--|---------|--|-----------|--|---------|--|-----------|--|---------|--|-----------|--|---------|--|-----------|--|---------|--|-----------|--|---------|--|-----------|--|---------|--|-----------|--|---------|--|-----------|--|---------|--|-----------|--|---------|--|-----------|--|---------|--|-----------|--|---------|--|-----------|--|---------|--|-----------|--|---------|--|-----------|--|---------|--|-----------|--|---------|--|-----------|--|---------|--|-----------|--|---------|--|-----------|--|---------|--|-----------|--|---------|--|-----------|--|---------|--|-----------|--|---------|--|-----------|--|---------|--|-----------|--|---------|--|-----------|--|---------|--|-----------|--|---------|--|-----------|--|---------|--|-----------|--|---------|--|-----------|--|---------|--|-----------|--|---------|--|-----------|--|---------|--|-----------|--|---------|--|-----------|--|---------|--|-----------|--|---------|--|-----------|--|---------|--|-----------|--|---------|--|-----------|--|---------|--|-----------|--|---------|--|-----------|--|---------|--|-----------|--|---------|--|-----------|--|---------|--|-----------|--|---------|--|-----------|--|---------|--|-----------|--|---------|--|-----------|--|---------|--|-----------|--|---------|--|-----------|--|---------|--|-----------|--|---------|--|-----------|--|---------|--|-----------|--|---------|--|-----------|--|---------|--|-----------|--|---------|--|-----------|--|---------|--|-----------|--|---------|--|-----------|--|---------|--|-----------|--|---------|--|-----------|--|---------|--|-----------|--|---------|--|-----------|--|---------|--|-----------|--|---------|--|-----------|--|---------|--|-----------|--|---------|--|-----------|--|---------|--|-----------|--|---------|--|-----------|--|---------|--|-----------|--|---------|--|-----------|--|---------|--|-----------|--|---------|--|-----------|--|---------|--|-----------|--|---------|--|-----------|--|---------|--|-----------|--|---------|--|-----------|--|---------|--|-----------|--|---------|--|-----------|--|---------|--|-----------|--|---------|--|-----------|--|---------|--|-----------|--|---------|--|-----------|--|---------|--|-----------|--|---------|--|-----------|--|---------|--|-----------|--|---------|--|-----------|--|---------|--|-----------|--|---------|--|-----------|--|---------|--|-----------|--|---------|--|-----------|--|---------|--|-----------|--|---------|--|-----------|--|---------|--|-----------|--|---------|--|-----------|--|---------|--|-----------|--|---------|--|-----------|--|---------|--|-----------|--|---------|--|-----------|--|---------|--|-----------|--|---------|--|-----------|--|---------|--|-----------|--|---------|--|-----------|--|---------|--|-----------|--|---------|--|-----------|--|---------|--|-----------|--|---------|--|-----------|--|---------|--|-----------|--|---------|--|-----------|--|---------|--|-----------|--|---------|--|-----------|--|---------|--|-----------|--|---------|--|-----------|--|---------|--|-----------|--|---------|--|-----------|--|---------|--|-----------|--|---------|--|-----------|--|---------|--|-----------|--|---------|--|-----------|--|---------|--|-----------|--|---------|--|-----------|--|---------|--|-----------|--|---------|--|-----------|--|---------|--|-----------|--|---------|--|-----------|--|---------|--|-----------|--|---------|--|-----------|--|---------|--|-----------|--|---------|--|-----------|--|---------|--|-----------|--|---------|--|-----------|--|---------|--|-----------|--|---------|--|-----------|--|---------|--|-----------|--|---------|--|-----------|--|---------|--|-----------|--|---------|--|-----------|--|---------|--|-----------|--|---------|--|-----------|--|---------|--|-----------|--|---------|--|-----------|--|---------|--|-----------|--|---------|--|-----------|--|---------|--|-----------|--|---------|--|-----------|--|---------|--|-----------|--|---------|--|-----------|--|---------|--|-----------|--|---------|--|-----------|--|---------|--|-----------|--|---------|--|-----------|--|---------|--|-----------|--|---------|--|-----------|--|---------|--|-----------|--|---------|--|-----------|--|---------|--|-----------|--|---------|--|-----------|--|---------|--|-----------|--|---------|--|-----------|--|---------|--|-----------|--|---------|--|-----------|--|---------|--|-----------|--|---------|--|-----------|--|---------|--|-----------|--|---------|--|-----------|--|---------|--|-----------|--|---------|--|-----------|--|---------|--|-----------|--|---------|--|-----------|--|---------|--|-----------|--|---------|--|-----------|--|---------|--|-----------|--|---------|--|-----------|--|---------|--|-----------|--|---------|--|-----------|--|---------|--|-----------|--|---------|--|-----------|--|---------|--|-----------|--|---------|--|-----------|--|---------|--|-----------|--|---------|--|-----------|--|---------|--|-----------|--|---------|--|-----------|--|---------|--|-----------|--|---------|--|-----------|--|---------|--|-----------|--|---------|--|-----------|--|---------|--|-----------|--|---------|--|-----------|--|---------|--|-----------|--|---------|--|-----------|--|---------|--|-----------|--|---------|--|-----------|--|---------|--|-----------|--|---------|--|-----------|--|---------|--|-----------|--|---------|--|-----------|--|---------|--|-----------|--|---------|--|-----------|--|---------|--|-----------|--|---------|--|-----------|--|---------|--|-----------|--|---------|--|-----------|--|---------|--|-----------|--|---------|--|-----------|--|---------|--|-----------|--|---------|--|-----------|--|---------|--|-----------|--|---------|--|-----------|--|---------|--|-----------|--|---------|--|-----------|--|---------|--|-----------|--|---------|--|-----------|--|---------|--|-----------|--|---------|--|-----------|--|---------|--|-----------|--|---------|--|-----------|--|---------|--|-----------|--|---------|--|-----------|--|---------|--|-----------|--|---------|--|-----------|--|---------|--|-----------|--|---------|--|-----------|--|---------|--|-----------|--|---------|--|-----------|--|---------|--|-----------|--|---------|--|-----------|--|---------|--|-----------|--|---------|--|-----------|--|---------|--|-----------|--|---------|--|-----------|--|---------|--|-----------|--|---------|--|-----------|--|---------|--|-----------|--|---------|--|-----------|--|---------|--|-----------|--|---------|--|-----------|--|---------|--|-----------|--|---------|--|-----------|--|---------|--|-----------|--|---------|--|-----------|--|---------|--|-----------|--|---------|--|-----------|--|---------|--|-----------|--|---------|--|-----------|--|---------|--|-----------|--|---------|--|-----------|--|---------|--|-----------|--|---------|--|-----------|--|---------|--|-----------|--|---------|--|-----------|--|---------|--|-----------|--|---------|--|-----------|--|---------|--|-----------|--|---------|--|-----------|--|---------|--|-----------|--|---------|--|-----------|--|---------|--|-----------|--|---------|--|-----------|--|---------|--|-----------|--|---------|--|-----------|--|---------|--|-----------|--|---------|--|-----------|--|---------|--|-----------|--|---------|--|-----------|--|---------|--|-----------|--|---------|--|-----------|--|---------|--|-----------|--|---------|--|-----------|--|---------|--|-----------|--|---------|--|

**Title:** Comparative Multidimensional Molecular Analyses of Pediatric Diffuse Intrinsic Pontine Glioma Reveals Distinct Molecular Subtypes  
**Journal:** Acta Neuropathologica

Javad Nazarian, Children's National Medical Center, Center for Genetic Medicine  
1111 M. M. Abney Ave., NW, Washington, DC 20010

Email: J.Nazarian@CNMC.ca

Javad Nazarian, Children's National Medical Center, Center for Gen

Phone: 202-476-6022 Fax: 202-476-6014  
E-mail: [DMcGowan@GMDAC.com](mailto:DMcGowan@GMDAC.com)

| Gene ID | Value(106<br>vs. n) | MeanRatio<br>(106 vs. n) | Fold |
|---------|---------------------|--------------------------|------|
|---------|---------------------|--------------------------|------|

**Title:** Comparative Multidimensional Molecular Analyses of Pediatric Diffuse Intrinsic Pontine Glioma Reveals Distinct Molecular Subtypes  
**Journal:** Acta Neuropathologica

Brennan Harmon, Jordan Hall, Eric H. Raabe, Ping An, Melanie Weingart, Brian Rood, Suresh Magge, Roger J. Packer, Javad

**Corresponding Author:**

111 Michigan Ave., NW, Washington DC, 20010

File: ESM - 10 (Online Resource)

**Title:** Comparative Multidimensional Molecular Analyses of Pelvic Diffuse Intrinsic Pustules: Genomic Glia Reveals Distinct Molecular Subtypes  
**Journal:** Acta Neuroepithologica

**Authors:** Amanda M. Sontas, Madhuri Kumbhakar, Kendall Sykes, Yashini G. Jay Devaray, Brennan Harmon, Jordan Hall, Eric H. Ruabe, Ping An, Melanie Weingart, Brian Ross, Sarah Mages, Roger J. Packer, Javad Nazarian

**Corresponding Author:**

Javad Nazarian, Children's National Medical Center, Center for Genomic Medicine  
111 Michigan Ave., NW, Washington DC, 20010  
Phone: 202-476-6022 Fax: 202-476-6014  
Email: J.Nazarian@CNMC.org

| Gene ID | p-value | FoldChange106 | FoldChange107 | FoldChange108 | FoldChange109 | FoldChange110 | FoldChange111 | FoldChange112 | FoldChange113 | FoldChange114 | FoldChange115 | FoldChange116 | FoldChange117 | FoldChange118 | FoldChange119 | FoldChange120 | FoldChange121 | FoldChange122 | FoldChange123 | FoldChange124 | FoldChange125 | FoldChange126 | FoldChange127 | FoldChange128 | FoldChange129 | FoldChange130 | FoldChange131 | FoldChange132 | FoldChange133 | FoldChange134 | FoldChange135 | FoldChange136 | FoldChange137 | FoldChange138 | FoldChange139 | FoldChange140 | FoldChange141 | FoldChange142 | FoldChange143 | FoldChange144 | FoldChange145 | FoldChange146 | FoldChange147 | FoldChange148 | FoldChange149 | FoldChange150 | FoldChange151 | FoldChange152 | FoldChange153 | FoldChange154 | FoldChange155 | FoldChange156 | FoldChange157 | FoldChange158 | FoldChange159 | FoldChange160 | FoldChange161 | FoldChange162 | FoldChange163 | FoldChange164 | FoldChange165 | FoldChange166 | FoldChange167 | FoldChange168 | FoldChange169 | FoldChange170 | FoldChange171 | FoldChange172 | FoldChange173 | FoldChange174 | FoldChange175 | FoldChange176 | FoldChange177 | FoldChange178 | FoldChange179 | FoldChange180 | FoldChange181 | FoldChange182 | FoldChange183 | FoldChange184 | FoldChange185 | FoldChange186 | FoldChange187 | FoldChange188 | FoldChange189 | FoldChange190 | FoldChange191 | FoldChange192 | FoldChange193 | FoldChange194 | FoldChange195 | FoldChange196 | FoldChange197 | FoldChange198 | FoldChange199 | FoldChange200 | FoldChange201 | FoldChange202 | FoldChange203 | FoldChange204 | FoldChange205 | FoldChange206 | FoldChange207 | FoldChange208 | FoldChange209 | FoldChange210 | FoldChange211 | FoldChange212 | FoldChange213 | FoldChange214 | FoldChange215 | FoldChange216 | FoldChange217 | FoldChange218 | FoldChange219 | FoldChange220 | FoldChange221 | FoldChange222 | FoldChange223 | FoldChange224 | FoldChange225 | FoldChange226 | FoldChange227 | FoldChange228 | FoldChange229 | FoldChange230 | FoldChange231 | FoldChange232 | FoldChange233 | FoldChange234 | FoldChange235 | FoldChange236 | FoldChange237 | FoldChange238 | FoldChange239 | FoldChange240 | FoldChange241 | FoldChange242 | FoldChange243 | FoldChange244 | FoldChange245 | FoldChange246 | FoldChange247 | FoldChange248 | FoldChange249 | FoldChange250 | FoldChange251 | FoldChange252 | FoldChange253 | FoldChange254 | FoldChange255 | FoldChange256 | FoldChange257 | FoldChange258 | FoldChange259 | FoldChange260 | FoldChange261 | FoldChange262 | FoldChange263 | FoldChange264 | FoldChange265 | FoldChange266 | FoldChange267 | FoldChange268 | FoldChange269 | FoldChange270 | FoldChange271 | FoldChange272 | FoldChange273 | FoldChange274 | FoldChange275 | FoldChange276 | FoldChange277 | FoldChange278 | FoldChange279 | FoldChange280 | FoldChange281 | FoldChange282 | FoldChange283 | FoldChange284 | FoldChange285 | FoldChange286 | FoldChange287 | FoldChange288 | FoldChange289 | FoldChange290 | FoldChange291 | FoldChange292 | FoldChange293 | FoldChange294 | FoldChange295 | FoldChange296 | FoldChange297 | FoldChange298 | FoldChange299 | FoldChange300 | FoldChange301 | FoldChange302 | FoldChange303 | FoldChange304 | FoldChange305 | FoldChange306 | FoldChange307 | FoldChange308 | FoldChange309 | FoldChange310 | FoldChange311 | FoldChange312 | FoldChange313 | FoldChange314 | FoldChange315 | FoldChange316 | FoldChange317 | FoldChange318 | FoldChange319 | FoldChange320 | FoldChange321 | FoldChange322 | FoldChange323 | FoldChange324 | FoldChange325 | FoldChange326 | FoldChange327 | FoldChange328 | FoldChange329 | FoldChange330 | FoldChange331 | FoldChange332 | FoldChange333 | FoldChange334 | FoldChange335 | FoldChange336 | FoldChange337 | FoldChange338 | FoldChange339 | FoldChange340 | FoldChange341 | FoldChange342 | FoldChange343 | FoldChange344 | FoldChange345 | FoldChange346 | FoldChange347 | FoldChange348 | FoldChange349 | FoldChange350 | FoldChange351 | FoldChange352 | FoldChange353 | FoldChange354 | FoldChange355 | FoldChange356 | FoldChange357 | FoldChange358 | FoldChange359 | FoldChange360 | FoldChange361 | FoldChange362 | FoldChange363 | FoldChange364 | FoldChange365 | FoldChange366 | FoldChange367 | FoldChange368 | FoldChange369 | FoldChange370 | FoldChange371 | FoldChange372 | FoldChange373 | FoldChange374 | FoldChange375 | FoldChange376 | FoldChange377 | FoldChange378 | FoldChange379 | FoldChange380 | FoldChange381 | FoldChange382 | FoldChange383 | FoldChange384 | FoldChange385 | FoldChange386 | FoldChange387 | FoldChange388 | FoldChange389 | FoldChange390 | FoldChange391 | FoldChange392 | FoldChange393 | FoldChange394 | FoldChange395 | FoldChange396 | FoldChange397 | FoldChange398 | FoldChange399 | FoldChange400 | FoldChange401 | FoldChange402 | FoldChange403 | FoldChange404 | FoldChange405 | FoldChange406 | FoldChange407 | FoldChange408 | FoldChange409 | FoldChange410 | FoldChange411 | FoldChange412 | FoldChange413 | FoldChange414 | FoldChange415 | FoldChange416 | FoldChange417 | FoldChange418 | FoldChange419 | FoldChange420 | FoldChange421 | FoldChange422 | FoldChange423 | FoldChange424 | FoldChange425 | FoldChange426 | FoldChange427 | FoldChange428 | FoldChange429 | FoldChange430 | FoldChange431 | FoldChange432 | FoldChange433 | FoldChange434 | FoldChange435 | FoldChange436 | FoldChange437 | FoldChange438 | FoldChange439 | FoldChange440 | FoldChange441 | FoldChange442 | FoldChange443 | FoldChange444 | FoldChange445 | FoldChange446 | FoldChange447 | FoldChange448 | FoldChange449 | FoldChange450 | FoldChange451 | FoldChange452 | FoldChange453 | FoldChange454 | FoldChange455 | FoldChange456 | FoldChange457 | FoldChange458 | FoldChange459 | FoldChange460 | FoldChange461 | FoldChange462 | FoldChange463 | FoldChange464 | FoldChange465 | FoldChange466 | FoldChange467 | FoldChange468 | FoldChange469 | FoldChange470 | FoldChange471 | FoldChange472 | FoldChange473 | FoldChange474 | FoldChange475 | FoldChange476 | FoldChange477 | FoldChange478 | FoldChange479 | FoldChange480 | FoldChange481 | FoldChange482 | FoldChange483 | FoldChange484 | FoldChange485 | FoldChange486 | FoldChange487 | FoldChange488 | FoldChange489 | FoldChange490 | FoldChange491 | FoldChange492 | FoldChange493 | FoldChange494 | FoldChange495 | FoldChange496 | FoldChange497 | FoldChange498 | FoldChange499 | FoldChange500 | FoldChange501 | FoldChange502 | FoldChange503 | FoldChange504 | FoldChange505 | FoldChange506 | FoldChange507 | FoldChange508 | FoldChange509 | FoldChange510 | FoldChange511 | FoldChange512 | FoldChange513 | FoldChange514 | FoldChange515 | FoldChange516 | FoldChange517 | FoldChange518 | FoldChange519 | FoldChange520 | FoldChange521 | FoldChange522 | FoldChange523 | FoldChange524 | FoldChange525 | FoldChange526 | FoldChange527 | FoldChange528 | FoldChange529 | FoldChange530 | FoldChange531 | FoldChange532 | FoldChange533 | FoldChange534 | FoldChange535 | FoldChange536 | FoldChange537 | FoldChange538 | FoldChange539 | FoldChange540 | FoldChange541 | FoldChange542 | FoldChange543 | FoldChange544 | FoldChange545 | FoldChange546 | FoldChange547 | FoldChange548 | FoldChange549 | FoldChange550 | FoldChange551 | FoldChange552 | FoldChange553 | FoldChange554 | FoldChange555 | FoldChange556 | FoldChange557 | FoldChange558 | FoldChange559 | FoldChange560 | FoldChange561 | FoldChange562 | FoldChange563 | FoldChange564 | FoldChange565 | FoldChange566 | FoldChange567 | FoldChange568 | FoldChange569 | FoldChange570 | FoldChange571 | FoldChange572 | FoldChange573 | FoldChange574 | FoldChange575 | FoldChange576 | FoldChange577 | FoldChange578 | FoldChange579 | FoldChange580 | FoldChange581 | FoldChange582 | FoldChange583 | FoldChange584 | FoldChange585 | FoldChange586 | FoldChange587 | FoldChange588 | FoldChange589 | FoldChange590 | FoldChange591 | FoldChange592 | FoldChange593 | FoldChange594 | FoldChange595 | FoldChange596 | FoldChange597 | FoldChange598 | FoldChange599 | FoldChange600 | FoldChange601 | FoldChange602 | FoldChange603 | FoldChange604 | FoldChange605 | FoldChange606 | FoldChange607 | FoldChange608 | FoldChange609 | FoldChange610 | FoldChange611 | FoldChange612 | FoldChange613 | FoldChange614 | FoldChange615 | FoldChange616 | FoldChange617 | FoldChange618 | FoldChange619 | FoldChange620 | FoldChange621 | FoldChange622 | FoldChange623 | FoldChange624 | FoldChange625 | FoldChange626 | FoldChange627 | FoldChange628 | FoldChange629 | FoldChange630 | FoldChange631 | FoldChange632 | FoldChange633 | FoldChange634 | FoldChange635 | FoldChange636 | FoldChange637 | FoldChange638 | FoldChange639 | FoldChange640 | FoldChange641 | FoldChange642 | FoldChange643 | FoldChange644 | FoldChange645 | FoldChange646 | FoldChange647 | FoldChange648 | FoldChange649 | FoldChange650 | FoldChange651 | FoldChange652 | FoldChange653 | FoldChange654 | FoldChange655 | FoldChange656 | FoldChange657 | FoldChange658 | FoldChange659 | FoldChange660 | FoldChange661 | FoldChange662 | FoldChange663 | FoldChange664 | FoldChange665 | FoldChange666 | FoldChange667 | FoldChange668 | FoldChange669 | FoldChange670 | FoldChange671 | FoldChange672 | FoldChange673 | FoldChange674 | FoldChange675 | FoldChange676 | FoldChange677 | FoldChange678 | FoldChange679 | FoldChange680 | FoldChange681 | FoldChange682 | FoldChange683 | FoldChange684 | FoldChange685 | FoldChange686 | FoldChange687 | FoldChange688 | FoldChange689 | FoldChange690 | FoldChange691 | FoldChange692 | FoldChange693 | FoldChange694 | FoldChange695 | FoldChange696 | FoldChange697 | FoldChange698 | FoldChange699 | FoldChange700 | FoldChange701 | FoldChange702 | FoldChange703 | FoldChange704 | FoldChange705 | FoldChange706 | FoldChange707 | FoldChange708 | FoldChange709 | FoldChange710 | FoldChange711 | FoldChange712 | FoldChange713 | FoldChange714 | FoldChange715 | FoldChange716 | FoldChange717 | FoldChange718 | FoldChange719 | FoldChange720 | FoldChange721 | FoldChange722 | FoldChange723 | FoldChange724 | FoldChange725 | FoldChange726 | FoldChange727 | FoldChange728 | FoldChange729 | FoldChange730 | FoldChange731 | FoldChange732 | FoldChange733 | FoldChange734 | FoldChange735 | FoldChange736 | FoldChange737 | FoldChange738 | FoldChange739 | FoldChange740 | FoldChange741 | FoldChange742 | FoldChange743 | FoldChange744 | FoldChange745 | FoldChange746 | FoldChange747 | FoldChange748 | FoldChange749 | FoldChange750 | FoldChange751 | FoldChange752 | FoldChange753 | FoldChange754 | FoldChange755 | FoldChange756 | FoldChange757 | FoldChange758 | FoldChange759 | FoldChange760 | FoldChange761 | FoldChange762 | FoldChange763 | FoldChange764 | FoldChange765 | FoldChange766 | FoldChange767 | FoldChange768 | FoldChange769 | FoldChange770 | FoldChange771 | FoldChange772 | FoldChange773 | FoldChange774 | FoldChange775 | FoldChange776 | FoldChange777 | FoldChange778 | FoldChange779 | FoldChange780 | FoldChange781 | FoldChange782 | FoldChange783 | FoldChange784 | FoldChange785 | FoldChange786 | FoldChange787 | FoldChange788 | FoldChange789 | FoldChange790 | FoldChange791 | FoldChange792 | FoldChange793 | FoldChange794 | FoldChange795 | FoldChange796 | FoldChange797 | FoldChange798 | FoldChange799 | FoldChange800 | FoldChange801 | FoldChange802 | FoldChange803 | FoldChange804 | FoldChange805 | FoldChange806 | FoldChange807 | FoldChange808 | FoldChange809 | FoldChange810 | FoldChange811 | FoldChange812 | FoldChange813 | FoldChange814 | FoldChange815 | FoldChange816 | FoldChange817 | FoldChange818 | FoldChange819 | FoldChange820 | FoldChange821 | FoldChange822 | FoldChange823 | FoldChange824 | FoldChange825 | FoldChange826 | FoldChange827 | FoldChange828 | FoldChange829 | FoldChange830 | FoldChange831 | FoldChange832 | FoldChange833 | FoldChange834 | FoldChange835 | FoldChange836 | FoldChange837 | FoldChange838 | FoldChange839 | FoldChange840 | FoldChange841 | FoldChange842 | FoldChange843 | FoldChange844 | FoldChange845 | FoldChange846 | FoldChange847 | FoldChange848 | FoldChange849 | FoldChange850 | FoldChange851 | FoldChange852 | FoldChange853 | FoldChange854 | FoldChange855 | FoldChange856 | FoldChange857 | FoldChange858 | FoldChange859 | FoldChange860 | FoldChange861 | FoldChange862 | FoldChange863 | FoldChange864 | FoldChange865 | FoldChange866 | FoldChange867 | FoldChange868 | FoldChange869 | FoldChange870 | FoldChange871 | FoldChange872 | FoldChange873 | FoldChange874 | FoldChange875 | FoldChange876 | FoldChange877 | FoldChange878 | FoldChange879 | FoldChange880 | FoldChange881 | FoldChange882 | FoldChange883 | FoldChange884 | FoldChange885 | FoldChange886 | FoldChange887 | FoldChange888 | FoldChange889 | FoldChange890 | FoldChange891 | FoldChange892 | FoldChange893 | FoldChange894 | FoldChange895 | FoldChange896 | FoldChange897 | FoldChange898 | FoldChange899 | FoldChange900 | FoldChange901 | FoldChange902 | FoldChange903 | FoldChange904 | FoldChange905 | FoldChange906 | FoldChange907 | FoldChange908 | FoldChange909 | FoldChange910 | FoldChange911 | FoldChange912 | FoldChange913 | FoldChange914 | FoldChange915 | FoldChange916 | FoldChange917 | FoldChange918 | FoldChange919 | FoldChange920 | FoldChange921 | FoldChange922 | FoldChange923 | FoldChange924 | FoldChange925 | FoldChange926 | FoldChange927 | FoldChange928 | FoldChange929 | FoldChange930 | FoldChange931 | FoldChange932 | FoldChange933 | FoldChange934 | FoldChange935 | FoldChange936 | FoldChange937 | FoldChange938 | FoldChange939 | FoldChange940 | FoldChange941 | FoldChange942 | FoldChange943 | FoldChange944 | FoldChange945 | FoldChange946 | FoldChange947 | FoldChange948 | FoldChange949 | FoldChange950 | FoldChange951 | FoldChange952 | FoldChange953 | FoldChange954 | FoldChange955 | FoldChange956 | FoldChange957 | FoldChange958 | FoldChange959 | FoldChange960 | FoldChange961 | FoldChange962 | FoldChange963 | FoldChange964 | FoldChange965 | FoldChange966 | FoldChange967 | FoldChange968 | FoldChange969 | FoldChange970 | FoldChange971 | FoldChange972 | FoldChange973 | FoldChange974 | FoldChange975 | FoldChange976 | FoldChange977 | FoldChange978 | FoldChange979 | FoldChange980 | FoldChange981 | FoldChange982 | FoldChange983 | FoldChange984 | FoldChange985 | FoldChange986 | FoldChange987 | FoldChange988 | FoldChange989 | FoldChange990 | FoldChange991 | FoldChange992 | FoldChange993 | FoldChange994 | FoldChange995 | FoldChange996 | FoldChange997 | FoldChange998 | FoldChange999 | FoldChange1000 |
|---------|---------|---------------|---------------|---------------|---------------|---------------|---------------|---------------|---------------|---------------|---------------|---------------|---------------|---------------|---------------|---------------|---------------|---------------|---------------|---------------|---------------|---------------|---------------|---------------|---------------|---------------|---------------|---------------|---------------|---------------|---------------|---------------|---------------|---------------|---------------|---------------|---------------|---------------|---------------|---------------|---------------|---------------|---------------|---------------|---------------|---------------|---------------|---------------|---------------|---------------|---------------|---------------|---------------|---------------|---------------|---------------|---------------|---------------|---------------|---------------|---------------|---------------|---------------|---------------|---------------|---------------|---------------|---------------|---------------|---------------|---------------|---------------|---------------|---------------|---------------|---------------|---------------|---------------|---------------|---------------|---------------|---------------|---------------|---------------|---------------|---------------|---------------|---------------|---------------|---------------|---------------|---------------|---------------|---------------|---------------|---------------|---------------|---------------|---------------|---------------|---------------|---------------|---------------|---------------|---------------|---------------|---------------|---------------|---------------|---------------|---------------|---------------|---------------|---------------|---------------|---------------|---------------|---------------|---------------|---------------|---------------|---------------|---------------|---------------|---------------|---------------|---------------|---------------|---------------|---------------|---------------|---------------|---------------|---------------|---------------|---------------|---------------|---------------|---------------|---------------|---------------|---------------|---------------|---------------|---------------|---------------|---------------|---------------|---------------|---------------|---------------|---------------|---------------|---------------|---------------|---------------|---------------|---------------|---------------|---------------|---------------|---------------|---------------|---------------|---------------|---------------|---------------|---------------|---------------|---------------|---------------|---------------|---------------|---------------|---------------|---------------|---------------|---------------|---------------|---------------|---------------|---------------|---------------|---------------|---------------|---------------|---------------|---------------|---------------|---------------|---------------|---------------|---------------|---------------|---------------|---------------|---------------|---------------|---------------|---------------|---------------|---------------|---------------|---------------|---------------|---------------|---------------|---------------|---------------|---------------|---------------|---------------|---------------|---------------|---------------|---------------|---------------|---------------|---------------|---------------|---------------|---------------|---------------|---------------|---------------|---------------|---------------|---------------|---------------|---------------|---------------|---------------|---------------|---------------|---------------|---------------|---------------|---------------|---------------|---------------|---------------|---------------|---------------|---------------|---------------|---------------|---------------|---------------|---------------|---------------|---------------|---------------|---------------|---------------|---------------|---------------|---------------|---------------|---------------|---------------|---------------|---------------|---------------|---------------|---------------|---------------|---------------|---------------|---------------|---------------|---------------|---------------|---------------|---------------|---------------|---------------|---------------|---------------|---------------|---------------|---------------|---------------|---------------|---------------|---------------|---------------|---------------|---------------|---------------|---------------|---------------|---------------|---------------|---------------|---------------|---------------|---------------|---------------|---------------|---------------|---------------|---------------|---------------|---------------|---------------|---------------|---------------|---------------|---------------|---------------|---------------|---------------|---------------|---------------|---------------|---------------|---------------|---------------|---------------|---------------|---------------|---------------|---------------|---------------|---------------|---------------|---------------|---------------|---------------|---------------|---------------|---------------|---------------|---------------|---------------|---------------|---------------|---------------|---------------|---------------|---------------|---------------|---------------|---------------|---------------|---------------|---------------|---------------|---------------|---------------|---------------|---------------|---------------|---------------|---------------|---------------|---------------|---------------|---------------|---------------|---------------|---------------|---------------|---------------|---------------|---------------|---------------|---------------|---------------|---------------|---------------|---------------|---------------|---------------|---------------|---------------|---------------|---------------|---------------|---------------|---------------|---------------|---------------|---------------|---------------|---------------|---------------|---------------|---------------|---------------|---------------|---------------|---------------|---------------|---------------|---------------|---------------|---------------|---------------|---------------|---------------|---------------|---------------|---------------|---------------|---------------|---------------|---------------|---------------|---------------|---------------|---------------|---------------|---------------|---------------|---------------|---------------|---------------|---------------|---------------|---------------|---------------|---------------|---------------|---------------|---------------|---------------|---------------|---------------|---------------|---------------|---------------|---------------|---------------|---------------|---------------|---------------|---------------|---------------|---------------|---------------|---------------|---------------|---------------|---------------|---------------|---------------|---------------|---------------|---------------|---------------|---------------|---------------|---------------|---------------|---------------|---------------|---------------|---------------|---------------|---------------|---------------|---------------|---------------|---------------|---------------|---------------|---------------|---------------|---------------|---------------|---------------|---------------|---------------|---------------|---------------|---------------|---------------|---------------|---------------|---------------|---------------|---------------|---------------|---------------|---------------|---------------|---------------|---------------|---------------|---------------|---------------|---------------|---------------|---------------|---------------|---------------|---------------|---------------|---------------|---------------|---------------|---------------|---------------|---------------|---------------|---------------|---------------|---------------|---------------|---------------|---------------|---------------|---------------|---------------|---------------|---------------|---------------|---------------|---------------|---------------|---------------|---------------|---------------|---------------|---------------|---------------|---------------|---------------|---------------|---------------|---------------|---------------|---------------|---------------|---------------|---------------|---------------|---------------|---------------|---------------|---------------|---------------|---------------|---------------|---------------|---------------|---------------|---------------|---------------|---------------|---------------|---------------|---------------|---------------|---------------|---------------|---------------|---------------|---------------|---------------|---------------|---------------|---------------|---------------|---------------|---------------|---------------|---------------|---------------|---------------|---------------|---------------|---------------|---------------|---------------|---------------|---------------|---------------|---------------|---------------|---------------|---------------|---------------|---------------|---------------|---------------|---------------|---------------|---------------|---------------|---------------|---------------|---------------|---------------|---------------|---------------|---------------|---------------|---------------|---------------|---------------|---------------|---------------|---------------|---------------|---------------|---------------|---------------|---------------|---------------|---------------|---------------|---------------|---------------|---------------|---------------|---------------|---------------|---------------|---------------|---------------|---------------|---------------|---------------|---------------|---------------|---------------|---------------|---------------|---------------|---------------|---------------|---------------|---------------|---------------|---------------|---------------|---------------|---------------|---------------|---------------|---------------|---------------|---------------|---------------|---------------|---------------|---------------|---------------|---------------|---------------|---------------|---------------|---------------|---------------|---------------|---------------|---------------|---------------|---------------|---------------|---------------|---------------|---------------|---------------|---------------|---------------|---------------|---------------|---------------|---------------|---------------|---------------|---------------|---------------|---------------|---------------|---------------|---------------|---------------|---------------|---------------|---------------|---------------|---------------|---------------|---------------|---------------|---------------|---------------|---------------|---------------|---------------|---------------|---------------|---------------|---------------|---------------|---------------|---------------|---------------|---------------|---------------|---------------|---------------|---------------|---------------|---------------|---------------|---------------|---------------|---------------|---------------|---------------|---------------|---------------|---------------|---------------|---------------|---------------|---------------|---------------|---------------|---------------|---------------|---------------|---------------|---------------|---------------|---------------|---------------|---------------|---------------|---------------|---------------|---------------|---------------|---------------|---------------|---------------|---------------|---------------|---------------|---------------|---------------|---------------|---------------|---------------|---------------|---------------|---------------|---------------|---------------|---------------|---------------|---------------|---------------|---------------|---------------|---------------|---------------|---------------|---------------|---------------|---------------|---------------|---------------|---------------|---------------|---------------|---------------|---------------|---------------|---------------|---------------|---------------|---------------|---------------|---------------|---------------|---------------|---------------|---------------|---------------|---------------|---------------|---------------|---------------|---------------|---------------|---------------|---------------|---------------|---------------|---------------|---------------|---------------|---------------|---------------|---------------|---------------|---------------|---------------|---------------|---------------|---------------|---------------|---------------|---------------|---------------|---------------|---------------|---------------|---------------|---------------|---------------|---------------|---------------|---------------|---------------|---------------|---------------|---------------|---------------|---------------|---------------|---------------|---------------|---------------|---------------|---------------|---------------|---------------|---------------|---------------|---------------|---------------|---------------|---------------|---------------|---------------|---------------|---------------|---------------|---------------|---------------|---------------|---------------|---------------|---------------|---------------|---------------|---------------|---------------|---------------|---------------|---------------|---------------|---------------|---------------|---------------|---------------|---------------|---------------|---------------|---------------|---------------|---------------|---------------|---------------|---------------|---------------|---------------|---------------|---------------|---------------|---------------|---------------|---------------|---------------|---------------|---------------|---------------|---------------|---------------|---------------|---------------|---------------|---------------|---------------|---------------|---------------|---------------|---------------|----------------|
|---------|---------|---------------|---------------|---------------|---------------|---------------|---------------|---------------|---------------|---------------|---------------|---------------|---------------|---------------|---------------|---------------|---------------|---------------|---------------|---------------|---------------|---------------|---------------|---------------|---------------|---------------|---------------|---------------|---------------|---------------|---------------|---------------|---------------|---------------|---------------|---------------|---------------|---------------|---------------|---------------|---------------|---------------|---------------|---------------|---------------|---------------|---------------|---------------|---------------|---------------|---------------|---------------|---------------|---------------|---------------|---------------|---------------|---------------|---------------|---------------|---------------|---------------|---------------|---------------|---------------|---------------|---------------|---------------|---------------|---------------|---------------|---------------|---------------|---------------|---------------|---------------|---------------|---------------|---------------|---------------|---------------|---------------|---------------|---------------|---------------|---------------|---------------|---------------|---------------|---------------|---------------|---------------|---------------|---------------|---------------|---------------|---------------|---------------|---------------|---------------|---------------|---------------|---------------|---------------|---------------|---------------|---------------|---------------|---------------|---------------|---------------|---------------|---------------|---------------|---------------|---------------|---------------|---------------|---------------|---------------|---------------|---------------|---------------|---------------|---------------|---------------|---------------|---------------|---------------|---------------|---------------|---------------|---------------|---------------|---------------|---------------|---------------|---------------|---------------|---------------|---------------|---------------|---------------|---------------|---------------|---------------|---------------|---------------|---------------|---------------|---------------|---------------|---------------|---------------|---------------|---------------|---------------|---------------|---------------|---------------|---------------|---------------|---------------|---------------|---------------|---------------|---------------|---------------|---------------|---------------|---------------|---------------|---------------|---------------|---------------|---------------|---------------|---------------|---------------|---------------|---------------|---------------|---------------|---------------|---------------|---------------|---------------|---------------|---------------|---------------|---------------|---------------|---------------|---------------|---------------|---------------|---------------|---------------|---------------|---------------|---------------|---------------|---------------|---------------|---------------|---------------|---------------|---------------|---------------|---------------|---------------|---------------|---------------|---------------|---------------|---------------|---------------|---------------|---------------|---------------|---------------|---------------|---------------|---------------|---------------|---------------|---------------|---------------|---------------|---------------|---------------|---------------|---------------|---------------|---------------|---------------|---------------|---------------|---------------|---------------|---------------|---------------|---------------|---------------|---------------|---------------|---------------|---------------|---------------|---------------|---------------|---------------|---------------|---------------|---------------|---------------|---------------|---------------|---------------|---------------|---------------|---------------|---------------|---------------|---------------|---------------|---------------|---------------|---------------|---------------|---------------|---------------|---------------|---------------|---------------|---------------|---------------|---------------|---------------|---------------|---------------|---------------|---------------|---------------|---------------|---------------|---------------|---------------|---------------|---------------|---------------|---------------|---------------|---------------|---------------|---------------|---------------|---------------|---------------|---------------|---------------|---------------|---------------|---------------|---------------|---------------|---------------|---------------|---------------|---------------|---------------|---------------|---------------|---------------|---------------|---------------|---------------|---------------|---------------|---------------|---------------|---------------|---------------|---------------|---------------|---------------|---------------|---------------|---------------|---------------|---------------|---------------|---------------|---------------|---------------|---------------|---------------|---------------|---------------|---------------|---------------|---------------|---------------|---------------|---------------|---------------|---------------|---------------|---------------|---------------|---------------|---------------|---------------|---------------|---------------|---------------|---------------|---------------|---------------|---------------|---------------|---------------|---------------|---------------|---------------|---------------|---------------|---------------|---------------|---------------|---------------|---------------|---------------|---------------|---------------|---------------|---------------|---------------|---------------|---------------|---------------|---------------|---------------|---------------|---------------|---------------|---------------|---------------|---------------|---------------|---------------|---------------|---------------|---------------|---------------|---------------|---------------|---------------|---------------|---------------|---------------|---------------|---------------|---------------|---------------|---------------|---------------|---------------|---------------|---------------|---------------|---------------|---------------|---------------|---------------|---------------|---------------|---------------|---------------|---------------|---------------|---------------|---------------|---------------|---------------|---------------|---------------|---------------|---------------|---------------|---------------|---------------|---------------|---------------|---------------|---------------|---------------|---------------|---------------|---------------|---------------|---------------|---------------|---------------|---------------|---------------|---------------|---------------|---------------|---------------|---------------|---------------|---------------|---------------|---------------|---------------|---------------|---------------|---------------|---------------|---------------|---------------|---------------|---------------|---------------|---------------|---------------|---------------|---------------|---------------|---------------|---------------|---------------|---------------|---------------|---------------|---------------|---------------|---------------|---------------|---------------|---------------|---------------|---------------|---------------|---------------|---------------|---------------|---------------|---------------|---------------|---------------|---------------|---------------|---------------|---------------|---------------|---------------|---------------|---------------|---------------|---------------|---------------|---------------|---------------|---------------|---------------|---------------|---------------|---------------|---------------|---------------|---------------|---------------|---------------|---------------|---------------|---------------|---------------|---------------|---------------|---------------|---------------|---------------|---------------|---------------|---------------|---------------|---------------|---------------|---------------|---------------|---------------|---------------|---------------|---------------|---------------|---------------|---------------|---------------|---------------|---------------|---------------|---------------|---------------|---------------|---------------|---------------|---------------|---------------|---------------|---------------|---------------|---------------|---------------|---------------|---------------|---------------|---------------|---------------|---------------|---------------|---------------|---------------|---------------|---------------|---------------|---------------|---------------|---------------|---------------|---------------|---------------|---------------|---------------|---------------|---------------|---------------|---------------|---------------|---------------|---------------|---------------|---------------|---------------|---------------|---------------|---------------|---------------|---------------|---------------|---------------|---------------|---------------|---------------|---------------|---------------|---------------|---------------|---------------|---------------|---------------|---------------|---------------|---------------|---------------|---------------|---------------|---------------|---------------|---------------|---------------|---------------|---------------|---------------|---------------|---------------|---------------|---------------|---------------|---------------|---------------|---------------|---------------|---------------|---------------|---------------|---------------|---------------|---------------|---------------|---------------|---------------|---------------|---------------|---------------|---------------|---------------|---------------|---------------|---------------|---------------|---------------|---------------|---------------|---------------|---------------|---------------|---------------|---------------|---------------|---------------|---------------|---------------|---------------|---------------|---------------|---------------|---------------|---------------|---------------|---------------|---------------|---------------|---------------|---------------|---------------|---------------|---------------|---------------|---------------|---------------|---------------|---------------|---------------|---------------|---------------|---------------|---------------|---------------|---------------|---------------|---------------|---------------|---------------|---------------|---------------|---------------|---------------|---------------|---------------|---------------|---------------|---------------|---------------|---------------|---------------|---------------|---------------|---------------|---------------|---------------|---------------|---------------|---------------|---------------|---------------|---------------|---------------|---------------|---------------|---------------|---------------|---------------|---------------|---------------|---------------|---------------|---------------|---------------|---------------|---------------|---------------|---------------|---------------|---------------|---------------|---------------|---------------|---------------|---------------|---------------|---------------|---------------|---------------|---------------|---------------|---------------|---------------|---------------|---------------|---------------|---------------|---------------|---------------|---------------|---------------|---------------|---------------|---------------|---------------|---------------|---------------|---------------|---------------|---------------|---------------|---------------|---------------|---------------|---------------|---------------|---------------|---------------|---------------|---------------|---------------|---------------|---------------|---------------|---------------|---------------|---------------|---------------|---------------|---------------|---------------|---------------|---------------|---------------|---------------|---------------|---------------|---------------|---------------|---------------|---------------|---------------|---------------|---------------|---------------|---------------|---------------|---------------|---------------|---------------|---------------|---------------|---------------|---------------|---------------|---------------|---------------|---------------|---------------|---------------|---------------|---------------|---------------|---------------|---------------|---------------|---------------|---------------|---------------|---------------|---------------|---------------|---------------|---------------|---------------|---------------|---------------|---------------|---------------|---------------|---------------|---------------|---------------|---------------|---------------|---------------|---------------|---------------|---------------|---------------|---------------|---------------|---------------|---------------|---------------|---------------|---------------|---------------|---------------|---------------|---------------|---------------|---------------|---------------|---------------|---------------|---------------|---------------|---------------|---------------|---------------|---------------|---------------|---------------|---------------|---------------|---------------|---------------|---------------|---------------|---------------|---------------|---------------|---------------|---------------|---------------|---------------|---------------|---------------|---------------|---------------|---------------|---------------|---------------|---------------|---------------|---------------|---------------|---------------|---------------|---------------|---------------|---------------|---------------|---------------|---------------|---------------|---------------|---------------|----------------|

Javad Nazarian, Children's National Medical Center, Center for Genetic Medicine

Phone: 202-476-6022 Fax: 202-476-6014  
E-mail: [DMorgan@CMBAC.com](mailto:DMorgan@CMBAC.com)

|    |                |    |                 |    |
|----|----------------|----|-----------------|----|
| n: | FoldChange[10] | n: | FoldChange[111] | n: |
|----|----------------|----|-----------------|----|

| Gene ID | value(106 vs. n) | MeshRatio | Foldchange( 106 vs. n) | (Description) | value(111 vs. n) | MeshRatio | Foldchange( 111 vs. n) | (Description) | value(112 vs. n) |
|---------|------------------|-----------|------------------------|---------------|------------------|-----------|------------------------|---------------|------------------|
|---------|------------------|-----------|------------------------|---------------|------------------|-----------|------------------------|---------------|------------------|
