# Supplementary material
Source: PubMed Central journal article supplement (PMC4028366)
Supplement: NIHMS545812-supplement-401_2013_1218_MOESM12_ESM.pdf [file NIHMS545812-supplement-401_2013_1218_MOESM12_ESM.pdf]

File: ESM\_10 (Online Resource 10)

**Figure 3.** Comparative Multidimensional Molecular Analyses of Pediatric Diffuse Intrinsic Pilonic Glioma Reveals Distinct Molecular Subtypes  
**Journal:** Acta Neuropathologica

**Authors:** Amanda M. Stransik, Madhuri Kumbhakar, Kendall Snyder, Sidney Yashvili, Joe Devenney, Brennan Harmon, Jordan Hall, Eric H. Rubie, Ping An, Melanie Weingart, Brian Ross, Sarah Magee, Roger J. Packer, Javad Nazarian

**Corresponding Author:**

Javad Nazarian, Children's National Medical Center, Center for Genetic Medicine  
111 Michigan Ave., NW, Washington DC, 20010  
Tel: 202-476-0212; Fax: 202-476-6014  
Email: J.Nazarian@CNMC.org

| Gene ID | P | vs. n | FolChangE106 |  | p | vs. n | FolChangE110 |  | p | vs. n | FolChangE111 |  | p | vs. n | FolChangE112 |  | p | vs. n | FolChangE121 |  | p | vs. n | FolChangE122 |  | p | vs. n | FolChangE131 |  | p | vs. n | FolChangE132 |  | p | vs. n | FolChangE133 |  | p | vs. n | FolChangE134 |  | p | vs. n | FolChangE135 |  | p | vs. n | FolChangE136 |  | p | vs. n | FolChangE137 |  | p | vs. n | FolChangE138 |  | p | vs. n | FolChangE139 |  | p | vs. n | FolChangE140 |  | p | vs. n | FolChangE141 |  | p | vs. n | FolChangE142 |  | p | vs. n | FolChangE143 |  | p | vs. n | FolChangE144 |  | p | vs. n | FolChangE145 |  | p | vs. n | FolChangE146 |  | p | vs. n | FolChangE147 |  | p | vs. n | FolChangE148 |  | p | vs. n | FolChangE149 |  | p | vs. n | FolChangE150 |  | p | vs. n | FolChangE151 |  | p | vs. n | FolChangE152 |  | p | vs. n | FolChangE153 |  | p | vs. n | FolChangE154 |  | p | vs. n | FolChangE155 |  | p | vs. n | FolChangE156 |  | p | vs. n | FolChangE157 |  | p | vs. n | FolChangE158 |  | p | vs. n | FolChangE159 |  | p | vs. n | FolChangE160 |  | p | vs. n | FolChangE161 |  | p | vs. n | FolChangE162 |  | p | vs. n | FolChangE163 |  | p | vs. n | FolChangE164 |  | p | vs. n | FolChangE165 |  | p | vs. n | FolChangE166 |  | p | vs. n | FolChangE167 |  | p | vs. n | FolChangE168 |  | p | vs. n | FolChangE169 |  | p | vs. n | FolChangE170 |  | p | vs. n | FolChangE171 |  | p | vs. n | FolChangE172 |  | p | vs. n | FolChangE173 |  | p | vs. n | FolChangE174 |  | p | vs. n | FolChangE175 |  | p | vs. n | FolChangE176 |  | p | vs. n | FolChangE177 |  | p | vs. n | FolChangE178 |  | p | vs. n | FolChangE179 |  | p | vs. n | FolChangE180 |  | p | vs. n | FolChangE181 |  | p | vs. n | FolChangE182 |  | p | vs. n | FolChangE183 |  | p | vs. n | FolChangE184 |  | p | vs. n | FolChangE185 |  | p | vs. n | FolChangE186 |  | p | vs. n | FolChangE187 |  | p | vs. n | FolChangE188 |  | p | vs. n | FolChangE189 |  | p | vs. n | FolChangE190 |  | p | vs. n | FolChangE191 |  | p | vs. n | FolChangE192 |  | p | vs. n | FolChangE193 |  | p | vs. n | FolChangE194 |  | p | vs. n | FolChangE195 |  | p | vs. n | FolChangE196 |  | p | vs. n | FolChangE197 |  | p | vs. n | FolChangE198 |  | p | vs. n | FolChangE199 |  | p | vs. n | FolChangE200 |  | p | vs. n | FolChangE201 |  | p | vs. n | FolChangE202 |  | p | vs. n | FolChangE203 |  | p | vs. n | FolChangE204 |  | p | vs. n | FolChangE205 |  | p | vs. n | FolChangE206 |  | p | vs. n | FolChangE207 |  | p | vs. n | FolChangE208 |  | p | vs. n | FolChangE209 |  | p | vs. n | FolChangE210 |  | p | vs. n | FolChangE211 |  | p | vs. n | FolChangE212 |  | p | vs. n | FolChangE213 |  | p | vs. n | FolChangE214 |  | p | vs. n | FolChangE215 |  | p | vs. n | FolChangE216 |  | p | vs. n | FolChangE217 |  | p | vs. n | FolChangE218 |  | p | vs. n | FolChangE219 |  | p | vs. n | FolChangE220 |  | p | vs. n | FolChangE221 |  | p | vs. n | FolChangE222 |  | p | vs. n | FolChangE223 |  | p | vs. n | FolChangE224 |  | p | vs. n | FolChangE225 |  | p | vs. n | FolChangE226 |  | p | vs. n | FolChangE227 |  | p | vs. n | FolChangE228 |  | p | vs. n | FolChangE229 |  | p | vs. n | FolChangE230 |  | p | vs. n | FolChangE231 |  | p | vs. n | FolChangE232 |  | p | vs. n | FolChangE233 |  | p | vs. n | FolChangE234 |  | p | vs. n | FolChangE235 |  | p | vs. n | FolChangE236 |  | p | vs. n | FolChangE237 |  | p | vs. n | FolChangE238 |  | p | vs. n | FolChangE239 |  | p | vs. n | FolChangE240 |  | p | vs. n | FolChangE241 |  | p | vs. n | FolChangE242 |  | p | vs. n | FolChangE243 |  | p | vs. n | FolChangE244 |  | p | vs. n | FolChangE245 |  | p | vs. n | FolChangE246 |  | p | vs. n | FolChangE247 |  | p | vs. n | FolChangE248 |  | p | vs. n | FolChangE249 |  | p | vs. n | FolChangE250 |  | p | vs. n | FolChangE251 |  | p | vs. n | FolChangE252 |  | p | vs. n | FolChangE253 |  | p | vs. n | FolChangE254 |  | p | vs. n | FolChangE255 |  | p | vs. n | FolChangE256 |  | p | vs. n | FolChangE257 |  | p | vs. n | FolChangE258 |  | p | vs. n | FolChangE259 |  | p | vs. n | FolChangE260 |  | p | vs. n | FolChangE261 |  | p | vs. n | FolChangE262 |  | p | vs. n | FolChangE263 |  | p | vs. n | FolChangE264 |  | p | vs. n | FolChangE265 |  | p | vs. n | FolChangE266 |  | p | vs. n | FolChangE267 |  | p | vs. n | FolChangE268 |  | p | vs. n | FolChangE269 |  | p | vs. n | FolChangE270 |  | p | vs. n | FolChangE271 |  | p | vs. n | FolChangE272 |  | p | vs. n | FolChangE273 |  | p | vs. n | FolChangE274 |  | p | vs. n | FolChangE275 |  | p | vs. n | FolChangE276 |  | p | vs. n | FolChangE277 |  | p | vs. n | FolChangE278 |  | p | vs. n | FolChangE279 |  | p | vs. n | FolChangE280 |  | p | vs. n | FolChangE281 |  | p | vs. n | FolChangE282 |  | p | vs. n | FolChangE283 |  | p | vs. n | FolChangE284 |  | p | vs. n | FolChangE285 |  | p | vs. n | FolChangE286 |  | p | vs. n | FolChangE287 |  | p | vs. n | FolChangE288 |  | p | vs. n | FolChangE289 |  | p | vs. n | FolChangE290 |  | p | vs. n | FolChangE291 |  | p | vs. n | FolChangE292 |  | p | vs. n | FolChangE293 |  | p | vs. n | FolChangE294 |  | p | vs. n | FolChangE295 |  | p | vs. n | FolChangE296 |  | p | vs. n | FolChangE297 |  | p | vs. n | FolChangE298 |  | p | vs. n | FolChangE299 |  | p | vs. n | FolChangE300 |  | p | vs. n | FolChangE301 |  | p | vs. n | FolChangE302 |  | p | vs. n | FolChangE303 |  | p | vs. n | FolChangE304 |  | p | vs. n | FolChangE305 |  | p | vs. n | FolChangE306 |  | p | vs. n | FolChangE307 |  | p | vs. n | FolChangE308 |  |
|---------|---|-------|--------------|--|---|-------|--------------|--|---|-------|--------------|--|---|-------|--------------|--|---|-------|--------------|--|---|-------|--------------|--|---|-------|--------------|--|---|-------|--------------|--|---|-------|--------------|--|---|-------|--------------|--|---|-------|--------------|--|---|-------|--------------|--|---|-------|--------------|--|---|-------|--------------|--|---|-------|--------------|--|---|-------|--------------|--|---|-------|--------------|--|---|-------|--------------|--|---|-------|--------------|--|---|-------|--------------|--|---|-------|--------------|--|---|-------|--------------|--|---|-------|--------------|--|---|-------|--------------|--|---|-------|--------------|--|---|-------|--------------|--|---|-------|--------------|--|---|-------|--------------|--|---|-------|--------------|--|---|-------|--------------|--|---|-------|--------------|--|---|-------|--------------|--|---|-------|--------------|--|---|-------|--------------|--|---|-------|--------------|--|---|-------|--------------|--|---|-------|--------------|--|---|-------|--------------|--|---|-------|--------------|--|---|-------|--------------|--|---|-------|--------------|--|---|-------|--------------|--|---|-------|--------------|--|---|-------|--------------|--|---|-------|--------------|--|---|-------|--------------|--|---|-------|--------------|--|---|-------|--------------|--|---|-------|--------------|--|---|-------|--------------|--|---|-------|--------------|--|---|-------|--------------|--|---|-------|--------------|--|---|-------|--------------|--|---|-------|--------------|--|---|-------|--------------|--|---|-------|--------------|--|---|-------|--------------|--|---|-------|--------------|--|---|-------|--------------|--|---|-------|--------------|--|---|-------|--------------|--|---|-------|--------------|--|---|-------|--------------|--|---|-------|--------------|--|---|-------|--------------|--|---|-------|--------------|--|---|-------|--------------|--|---|-------|--------------|--|---|-------|--------------|--|---|-------|--------------|--|---|-------|--------------|--|---|-------|--------------|--|---|-------|--------------|--|---|-------|--------------|--|---|-------|--------------|--|---|-------|--------------|--|---|-------|--------------|--|---|-------|--------------|--|---|-------|--------------|--|---|-------|--------------|--|---|-------|--------------|--|---|-------|--------------|--|---|-------|--------------|--|---|-------|--------------|--|---|-------|--------------|--|---|-------|--------------|--|---|-------|--------------|--|---|-------|--------------|--|---|-------|--------------|--|---|-------|--------------|--|---|-------|--------------|--|---|-------|--------------|--|---|-------|--------------|--|---|-------|--------------|--|---|-------|--------------|--|---|-------|--------------|--|---|-------|--------------|--|---|-------|--------------|--|---|-------|--------------|--|---|-------|--------------|--|---|-------|--------------|--|---|-------|--------------|--|---|-------|--------------|--|---|-------|--------------|--|---|-------|--------------|--|---|-------|--------------|--|---|-------|--------------|--|---|-------|--------------|--|---|-------|--------------|--|---|-------|--------------|--|---|-------|--------------|--|---|-------|--------------|--|---|-------|--------------|--|---|-------|--------------|--|---|-------|--------------|--|---|-------|--------------|--|---|-------|--------------|--|---|-------|--------------|--|---|-------|--------------|--|---|-------|--------------|--|---|-------|--------------|--|---|-------|--------------|--|---|-------|--------------|--|---|-------|--------------|--|---|-------|--------------|--|---|-------|--------------|--|---|-------|--------------|--|---|-------|--------------|--|---|-------|--------------|--|---|-------|--------------|--|---|-------|--------------|--|---|-------|--------------|--|---|-------|--------------|--|---|-------|--------------|--|---|-------|--------------|--|---|-------|--------------|--|---|-------|--------------|--|---|-------|--------------|--|---|-------|--------------|--|---|-------|--------------|--|---|-------|--------------|--|---|-------|--------------|--|---|-------|--------------|--|---|-------|--------------|--|---|-------|--------------|--|---|-------|--------------|--|---|-------|--------------|--|---|-------|--------------|--|---|-------|--------------|--|---|-------|--------------|--|---|-------|--------------|--|---|-------|--------------|--|---|-------|--------------|--|---|-------|--------------|--|---|-------|--------------|--|---|-------|--------------|--|---|-------|--------------|--|---|-------|--------------|--|---|-------|--------------|--|---|-------|--------------|--|---|-------|--------------|--|---|-------|--------------|--|---|-------|--------------|--|---|-------|--------------|--|---|-------|--------------|--|---|-------|--------------|--|---|-------|--------------|--|---|-------|--------------|--|---|-------|--------------|--|---|-------|--------------|--|---|-------|--------------|--|---|-------|--------------|--|---|-------|--------------|--|---|-------|--------------|--|---|-------|--------------|--|---|-------|--------------|--|---|-------|--------------|--|---|-------|--------------|--|---|-------|--------------|--|---|-------|--------------|--|---|-------|--------------|--|---|-------|--------------|--|---|-------|--------------|--|
|---------|---|-------|--------------|--|---|-------|--------------|--|---|-------|--------------|--|---|-------|--------------|--|---|-------|--------------|--|---|-------|--------------|--|---|-------|--------------|--|---|-------|--------------|--|---|-------|--------------|--|---|-------|--------------|--|---|-------|--------------|--|---|-------|--------------|--|---|-------|--------------|--|---|-------|--------------|--|---|-------|--------------|--|---|-------|--------------|--|---|-------|--------------|--|---|-------|--------------|--|---|-------|--------------|--|---|-------|--------------|--|---|-------|--------------|--|---|-------|--------------|--|---|-------|--------------|--|---|-------|--------------|--|---|-------|--------------|--|---|-------|--------------|--|---|-------|--------------|--|---|-------|--------------|--|---|-------|--------------|--|---|-------|--------------|--|---|-------|--------------|--|---|-------|--------------|--|---|-------|--------------|--|---|-------|--------------|--|---|-------|--------------|--|---|-------|--------------|--|---|-------|--------------|--|---|-------|--------------|--|---|-------|--------------|--|---|-------|--------------|--|---|-------|--------------|--|---|-------|--------------|--|---|-------|--------------|--|---|-------|--------------|--|---|-------|--------------|--|---|-------|--------------|--|---|-------|--------------|--|---|-------|--------------|--|---|-------|--------------|--|---|-------|--------------|--|---|-------|--------------|--|---|-------|--------------|--|---|-------|--------------|--|---|-------|--------------|--|---|-------|--------------|--|---|-------|--------------|--|---|-------|--------------|--|---|-------|--------------|--|---|-------|--------------|--|---|-------|--------------|--|---|-------|--------------|--|---|-------|--------------|--|---|-------|--------------|--|---|-------|--------------|--|---|-------|--------------|--|---|-------|--------------|--|---|-------|--------------|--|---|-------|--------------|--|---|-------|--------------|--|---|-------|--------------|--|---|-------|--------------|--|---|-------|--------------|--|---|-------|--------------|--|---|-------|--------------|--|---|-------|--------------|--|---|-------|--------------|--|---|-------|--------------|--|---|-------|--------------|--|---|-------|--------------|--|---|-------|--------------|--|---|-------|--------------|--|---|-------|--------------|--|---|-------|--------------|--|---|-------|--------------|--|---|-------|--------------|--|---|-------|--------------|--|---|-------|--------------|--|---|-------|--------------|--|---|-------|--------------|--|---|-------|--------------|--|---|-------|--------------|--|---|-------|--------------|--|---|-------|--------------|--|---|-------|--------------|--|---|-------|--------------|--|---|-------|--------------|--|---|-------|--------------|--|---|-------|--------------|--|---|-------|--------------|--|---|-------|--------------|--|---|-------|--------------|--|---|-------|--------------|--|---|-------|--------------|--|---|-------|--------------|--|---|-------|--------------|--|---|-------|--------------|--|---|-------|--------------|--|---|-------|--------------|--|---|-------|--------------|--|---|-------|--------------|--|---|-------|--------------|--|---|-------|--------------|--|---|-------|--------------|--|---|-------|--------------|--|---|-------|--------------|--|---|-------|--------------|--|---|-------|--------------|--|---|-------|--------------|--|---|-------|--------------|--|---|-------|--------------|--|---|-------|--------------|--|---|-------|--------------|--|---|-------|--------------|--|---|-------|--------------|--|---|-------|--------------|--|---|-------|--------------|--|---|-------|--------------|--|---|-------|--------------|--|---|-------|--------------|--|---|-------|--------------|--|---|-------|--------------|--|---|-------|--------------|--|---|-------|--------------|--|---|-------|--------------|--|---|-------|--------------|--|---|-------|--------------|--|---|-------|--------------|--|---|-------|--------------|--|---|-------|--------------|--|---|-------|--------------|--|---|-------|--------------|--|---|-------|--------------|--|---|-------|--------------|--|---|-------|--------------|--|---|-------|--------------|--|---|-------|--------------|--|---|-------|--------------|--|---|-------|--------------|--|---|-------|--------------|--|---|-------|--------------|--|---|-------|--------------|--|---|-------|--------------|--|---|-------|--------------|--|---|-------|--------------|--|---|-------|--------------|--|---|-------|--------------|--|---|-------|--------------|--|---|-------|--------------|--|---|-------|--------------|--|---|-------|--------------|--|---|-------|--------------|--|---|-------|--------------|--|---|-------|--------------|--|---|-------|--------------|--|---|-------|--------------|--|---|-------|--------------|--|---|-------|--------------|--|---|-------|--------------|--|---|-------|--------------|--|---|-------|--------------|--|---|-------|--------------|--|---|-------|--------------|--|---|-------|--------------|--|---|-------|--------------|--|---|-------|--------------|--|---|-------|--------------|--|---|-------|--------------|--|---|-------|--------------|--|---|-------|--------------|--|---|-------|--------------|--|---|-------|--------------|--|---|-------|--------------|--|---|-------|--------------|--|---|-------|--------------|--|





Содержание: 1. Введение. 2. Описание объекта исследования. 3. Методика исследования. 4. Результаты исследования. 5. Заключение. 6. Литература. 7. Приложение. 8. Библиография.

Javad Nazarian, Children's National Medical Center, Center for Gen-

|    |                   |                   |
|----|-------------------|-------------------|
| n. | FoldChange[10] n. | FoldChange[11] n. |
|----|-------------------|-------------------|

| id | value101 |  |  |  | value111 | value121 |  |  |  | value131 | value141 |  |  |  | value151 | value161 |  |  |  | value171 | value181 |  |  |  | value191 | value201 |  |  |  | value211 | value221 |  |  |  | value231 | value241 |  |  |  | value251 | value261 |  |  |  | value271 | value281 |  |  |  | value291 | value301 |  |  |  | value311 | value321 |  |  |  | value331 | value341 |  |  |  | value351 | value361 |  |  |  | value371 | value381 |  |  |  | value391 | value401 |  |  |  | value411 | value421 |  |  |  | value431 | value441 |  |  |  | value451 | value461 |  |  |  | value471 | value481 |  |  |  | value491 | value501 |  |  |  | value511 | value521 |  |  |  | value531 | value541 |  |  |  | value551 | value561 |  |  |  | value571 | value581 |  |  |  | value591 | value601 |  |  |  | value611 | value621 |  |  |  | value631 | value641 |  |  |  | value651 | value661 |  |  |  | value671 | value681 |  |  |  | value691 | value701 |  |  |  | value711 | value721 |  |  |  | value731 | value741 |  |  |  | value751 | value761 |  |  |  | value771 | value781 |  |  |  | value791 | value801 |  |  |  | value811 | value821 |  |  |  | value831 | value841 |  |  |  | value851 | value861 |  |  |  | value871 | value881 |  |  |  | value891 | value901 |  |  |  | value911 | value921 |  |  |  | value931 | value941 |  |  |  | value951 | value961 |  |  |  | value971 | value981 |  |  |  | value991 | value1001 |  |  |  | value1011 | value1021 |  |  |  | value1031 | value1041 |  |  |  | value1051 | value1061 |  |  |  | value1071 | value1081 |  |  |  | value1091 | value1101 |  |  |  | value1111 | value1121 |  |  |  | value1131 | value1141 |  |  |  | value1151 | value1161 |  |  |  | value1171 | value1181 |  |  |  | value1191 | value1201 |  |  |  | value1211 | value1221 |  |  |  | value1231 | value1241 |  |  |  | value1251 | value1261 |  |  |  | value1271 | value1281 |  |  |  | value1291 | value1301 |  |  |  | value1311 | value1321 |  |  |  | value1331 | value1341 |  |  |  | value1351 | value1361 |  |  |  | value1371 | value1381 |  |  |  | value1391 |
|----|----------|--|--|--|----------|----------|--|--|--|----------|----------|--|--|--|----------|----------|--|--|--|----------|----------|--|--|--|----------|----------|--|--|--|----------|----------|--|--|--|----------|----------|--|--|--|----------|----------|--|--|--|----------|----------|--|--|--|----------|----------|--|--|--|----------|----------|--|--|--|----------|----------|--|--|--|----------|----------|--|--|--|----------|----------|--|--|--|----------|----------|--|--|--|----------|----------|--|--|--|----------|----------|--|--|--|----------|----------|--|--|--|----------|----------|--|--|--|----------|----------|--|--|--|----------|----------|--|--|--|----------|----------|--|--|--|----------|----------|--|--|--|----------|----------|--|--|--|----------|----------|--|--|--|----------|----------|--|--|--|----------|----------|--|--|--|----------|----------|--|--|--|----------|----------|--|--|--|----------|----------|--|--|--|----------|----------|--|--|--|----------|----------|--|--|--|----------|----------|--|--|--|----------|----------|--|--|--|----------|----------|--|--|--|----------|----------|--|--|--|----------|----------|--|--|--|----------|----------|--|--|--|----------|----------|--|--|--|----------|----------|--|--|--|----------|----------|--|--|--|----------|----------|--|--|--|----------|----------|--|--|--|----------|----------|--|--|--|----------|-----------|--|--|--|-----------|-----------|--|--|--|-----------|-----------|--|--|--|-----------|-----------|--|--|--|-----------|-----------|--|--|--|-----------|-----------|--|--|--|-----------|-----------|--|--|--|-----------|-----------|--|--|--|-----------|-----------|--|--|--|-----------|-----------|--|--|--|-----------|-----------|--|--|--|-----------|-----------|--|--|--|-----------|-----------|--|--|--|-----------|-----------|--|--|--|-----------|-----------|--|--|--|-----------|-----------|--|--|--|-----------|-----------|--|--|--|-----------|-----------|--|--|--|-----------|-----------|--|--|--|-----------|-----------|--|--|--|-----------|
|----|----------|--|--|--|----------|----------|--|--|--|----------|----------|--|--|--|----------|----------|--|--|--|----------|----------|--|--|--|----------|----------|--|--|--|----------|----------|--|--|--|----------|----------|--|--|--|----------|----------|--|--|--|----------|----------|--|--|--|----------|----------|--|--|--|----------|----------|--|--|--|----------|----------|--|--|--|----------|----------|--|--|--|----------|----------|--|--|--|----------|----------|--|--|--|----------|----------|--|--|--|----------|----------|--|--|--|----------|----------|--|--|--|----------|----------|--|--|--|----------|----------|--|--|--|----------|----------|--|--|--|----------|----------|--|--|--|----------|----------|--|--|--|----------|----------|--|--|--|----------|----------|--|--|--|----------|----------|--|--|--|----------|----------|--|--|--|----------|----------|--|--|--|----------|----------|--|--|--|----------|----------|--|--|--|----------|----------|--|--|--|----------|----------|--|--|--|----------|----------|--|--|--|----------|----------|--|--|--|----------|----------|--|--|--|----------|----------|--|--|--|----------|----------|--|--|--|----------|----------|--|--|--|----------|----------|--|--|--|----------|----------|--|--|--|----------|----------|--|--|--|----------|----------|--|--|--|----------|----------|--|--|--|----------|----------|--|--|--|----------|-----------|--|--|--|-----------|-----------|--|--|--|-----------|-----------|--|--|--|-----------|-----------|--|--|--|-----------|-----------|--|--|--|-----------|-----------|--|--|--|-----------|-----------|--|--|--|-----------|-----------|--|--|--|-----------|-----------|--|--|--|-----------|-----------|--|--|--|-----------|-----------|--|--|--|-----------|-----------|--|--|--|-----------|-----------|--|--|--|-----------|-----------|--|--|--|-----------|-----------|--|--|--|-----------|-----------|--|--|--|-----------|-----------|--|--|--|-----------|-----------|--|--|--|-----------|-----------|--|--|--|-----------|-----------|--|--|--|-----------|











111 Michigan Ave., NW, Washington DC, 20010

— E-140L-----140 — E-140L-----144 —

| ID    | vs. n    | FoldeChange10 |               |            | FoldeChange11 |             |            | FoldeChange12 |           |               | FoldeChange13 |           |               | FoldeChange14 |           |               | FoldeChange15 |           |               | FoldeChange16 |           |             |         |         |             |                |           |
|-------|----------|---------------|---------------|------------|---------------|-------------|------------|---------------|-----------|---------------|---------------|-----------|---------------|---------------|-----------|---------------|---------------|-----------|---------------|---------------|-----------|-------------|---------|---------|-------------|----------------|-----------|
|       |          | Meanratio     | Meanratio     | FoldChange | Meanratio     | Meanratio   | FoldChange | Meanratio     | Meanratio | FoldChange    | Meanratio     | Meanratio | FoldChange    | Meanratio     | Meanratio | FoldChange    | Meanratio     | Meanratio | FoldChange    | Meanratio     | Meanratio | FoldChange  |         |         |             |                |           |
| MP149 | 0.247914 | -0.03866      | 106 down v. n | 3.4954     | 1.4454        | 111 up v. n | 1.1139     | 1.0383        | 1.0383    | 112 up v. n   | -0.20025      | -0.20025  | 121 down v. n | 0.22526       | -4.2122   | 112 down v. n | 0.53832       | -1.5519   | 135 down v. n | 5.88046       | 5.88046   | 537 up v. n | 2.2081  | 2.2081  | 563 up v. n | 1.888+10.53042 | 1.424+1.4 |
| MP149 | 0.247914 | -0.03866      | 106 down v. n | 3.4954     | 1.4454        | 111 up v. n | 1.1139     | 1.0383        | 1.0383    | 112 up v. n   | -0.20025      | -0.20025  | 121 down v. n | 0.22526       | -4.2122   | 112 down v. n | 0.53832       | -1.5519   | 135 down v. n | 5.88046       | 5.88046   | 537 up v. n | 2.2081  | 2.2081  | 563 up v. n | 1.888+10.53042 | 1.424+1.4 |
| MP151 | 0.315792 | -1.36665      | 106 down v. n | 2.4125     | 2.4125        | 111 up v. n | 0.10417    | 1.0417        | 1.0417    | 112 up v. n   | 0.70924       | -1.41697  | 121 down v. n | 0.70924       | -1.41697  | 121 down v. n | 1.22322       | 1.22322   | 135 down v. n | 2.49154       | 2.49154   | 537 up v. n | 2.24871 | 2.24871 | 563 up v. n | 7.67396        | 7.67396   |
| MP152 | 0.572106 | -1.74791      | 106 down v. n | 2.54012    | 2.54012       | 111 up v. n | 0.76644    | -1.3049       | 1.3049    | 112 down v. n | 0.73374       | -1.23672  | 121 down v. n | 0.73374       | -1.23672  | 121 down v. n | 0.192624      | -1.8138   | 135 down v. n | 4.51244       | 4.51244   | 537 up v. n | 3.51382 | 3.51382 | 563 up v. n | 2.476+10.2377  | 7.121+1.1 |
| MP152 | 0.572106 | -1.74791      | 106 down v. n | 2.54012    | 2.54012       | 111 up v. n | 0.76644    | -1.3049       | 1.3049    | 112 down v. n | 0.73374       | -1.23672  | 121 down v. n | 0.73374       | -1.23672  | 121 down v. n | 0.192624      | -1.8138   | 135 down v. n | 4.51244       | 4.51244   | 537 up v. n | 3.51382 | 3.51382 | 563 up v. n | 2.476+10.2377  | 7.121+1.1 |
| MP153 | 0.464881 | -1.55043      | 106 down v. n | 3.20086    | 3.20086       | 111 up v. n | 0.92224    | -1.08432      | 1.08432   | 112 up v. n   | 0.81174       | -1.23672  | 121 down v. n | 0.81174       | -1.23672  | 121 down v. n | 1.26396       | 1.26396   | 135 up v. n   | 4.18644       | 4.18644   | 537 up v. n | 4.51244 | 4.51244 | 563 up v. n | 1.446+10.2377  | 7.121+1.1 |
| MP154 | 0.429021 | -2.31         | 106 down v. n | 6.03413    | 6.03413       | 111 up v. n | 1.42521    | 1.42521       | 1.42521   | 112 up v. n   | 0.522091      | -1.93137  | 121 up v. n   | 0.522091      | -1.93137  | 121 up v. n   | 0.172726      | -6.6092   | 135 down v. n | 2.42324       | 2.42324   | 537 up v. n | 2.34358 | 2.34358 | 563 up v. n | 3.488+10.28204 | 7.121+1.1 |
| MP154 | 0.429021 | -2.31         | 106 down v. n | 6.03413    | 6.03413       | 111 up v. n | 1.42521    | 1.42521       | 1.42521   | 112 up v. n   | 0.522091      | -1.93137  | 121 up v. n   | 0.522091      | -1.93137  | 121 up v. n   | 0.172726      | -6.6092   | 135 down v. n | 2.42324       | 2.42324   | 537 up v. n | 2.34358 | 2.34358 | 563 up v. n | 3.488+10.28204 | 7.121+1.1 |
| MP155 | 0.419572 | -2.3838       | 106 down v. n | 4.00842    | 4.00842       | 111 up v. n | 0.22375    | 2.2375        | 2.2375    | 112 up v. n   | 1.32687       | 1.32687   | 121 up v. n   | 1.32687       | 1.32687   | 121 up v. n   | 1.25713       | 1.25713   | 135 down v. n | 2.67136       | 2.67136   | 537 up v. n | 2.34358 | 2.34358 | 563 up v. n | 1.696+10.28204 | 7.121+1.1 |
| MP155 | 0.419572 | -2.3838       | 106 down v. n | 4.00842    | 4.00842       | 111 up v. n | 0.22375    | 2.2375        | 2.2375    | 112 up v. n   | 1.32687       | 1.32687   | 121 up v. n   | 1.32687       | 1.32687   | 121 up v. n   | 1.25713       | 1.25713   | 135 down v. n | 2.67136       | 2.67136   | 537 up v. n | 2.34358 | 2.34358 | 563 up v. n | 1.696+10.28204 | 7.121+1.1 |
| MP155 | 0.553383 | -1.80772      | 106 down v. n | 2.47672    | 2.47672       | 111 up v. n | 1.40645    | 1.40645       | 1.40645   | 112 up v. n   | 1.26874       | 1.26874   | 121 up v. n   | 1.26874       | 1.26874   | 121 up v. n   | 1.09887       | 1.09887   | 135 up v. n   | 1.76071       | 1.76071   | 537 up v. n | 3.78647 | 3.78647 | 563 up v. n | 6.336+10.2772  | 1.424+1.4 |
| MP155 | 0.553383 | -1.80772      | 106 down v. n | 2          |               |             |            |               |           |               |               |           |               |               |           |               |               |           |               |               |           |             |         |         |             |                |           |

Javad Nazarian, Children's National Medical Center, Center for Genetic Medicine

REPRINTED FROM THE JOURNAL OF THE AMERICAN MEDICAL ASSOCIATION  
Copyright © 1964 by American Medical Association















Javad Nazarian, Children's National Medical Center

Phone: 202-476-6022 Fax: 202-476-6014



Javad Nazarian, Children's National Medical Center, Center for Genetic Medicine



























**Title:** Comparative Multidimensional Molecular Analyses of Pediatric Diffuse Intrinsic Pontine Glioma Reveals Distinct Molecular Subtypes  
**Journal:** Acta Neuropathologica

Javad Nazarian, Children's National Medical Center, Center for Genetic Medicine

|        |          |          |        |               |   |          |         |             |          |         |         |             |   |         |         |             |          |          |          |               |   |          |         |             |          |         |         |             |   |         |         |             |          |         |          |   |   |
|--------|----------|----------|--------|---------------|---|----------|---------|-------------|----------|---------|---------|-------------|---|---------|---------|-------------|----------|----------|----------|---------------|---|----------|---------|-------------|----------|---------|---------|-------------|---|---------|---------|-------------|----------|---------|----------|---|---|
| CDHAC2 | 6.31E-44 | 0.554937 | -1.802 | 106 down vs n | 0 | -4.12727 | 4.12727 | 111 up vs n | 9.81E-45 | 1.57898 | 1.57898 | 112 up vs n | 0 | 4.13716 | 4.13716 | 121 up vs n | 1.40E-45 | 0.195795 | -5.10738 | 347 down vs n | 0 | -24.6364 | 24.6364 | 353 up vs n | 1.40E-45 | 1.78232 | 1.78232 | 537 up vs n | 0 | 7.42726 | 7.42726 | 563 up vs n | 5.45E+15 | 708.665 | 1.14E-13 | 1 | 1 |
|--------|----------|----------|--------|---------------|---|----------|---------|-------------|----------|---------|---------|-------------|---|---------|---------|-------------|----------|----------|----------|---------------|---|----------|---------|-------------|----------|---------|---------|-------------|---|---------|---------|-------------|----------|---------|----------|---|---|



**Title:** Comparative Multidimensional Molecular Analyses of Pediatric Diffuse Intrinsic Pontine Glioma Reveals Distinct Molecular Subtypes  
**Journal:** Acta Neuropathologica

**Corresponding Author:**

Javad Nazarian, Children's National Medical Center, Center for Genetic Medicine  
111 Michigan Ave., NW, Washington DC, 20010

Phone: 202-476-6022 Fax: 202-476-6014  
Email: J.Nazarian@CNMC.org

Phone: 202-476-6022 Fax: 202-476-6014

p-                      FoldChange(10 p-                      FoldChange(111 p-

[illegible]







Journal: Acta Neuropathologica

Javad Nazarian, Children's National Medical Center, Center for Genetic Medicine  
 1111 M Street, N.W., Suite 3333, Washington, DC 20010

Email: [INazarian@CNMC.org](mailto:INazarian@CNMC.org)

p-                      FoldChange[10 p-                      FoldChange[111 p-

Javad Nazarian, Children's National Medical Center, Center for Genetic Medicine

Phone: 202-476-6022 Fax: 202-476-6014  
E-mail: [DMcneil@GMAA.org](mailto:DMcneil@GMAA.org)

|    |                |    |                 |
|----|----------------|----|-----------------|
| n: | FoldChange[10] | n: | FoldChange[111] |
|----|----------------|----|-----------------|

[illegible]









[illegible]



























**Title:** Comparative Multidimensional Molecular Analyses of Pediatric Diffuse Intrinsic Pontine Glioma Reveals Distinct Molecular Subtypes  
**Journal:** Acta Neuropathologica

Javad Nazarian, Children's National Medical Center, Center for Genetic Medicine

Email: [INazarian@CNMC.org](mailto:INazarian@CNMC.org)

| p: | FoldChange(10 | p: | FoldChange(111 | p: |
|----|---------------|----|----------------|----|
|----|---------------|----|----------------|----|

| Gene ID | vs. n | (106 vs. n) | 106 vs. n | (Description) | vs. n | (111 vs. n) | 111 vs. n | (Description) | vs. n |
|---------|-------|-------------|-----------|---------------|-------|-------------|-----------|---------------|-------|
|---------|-------|-------------|-----------|---------------|-------|-------------|-----------|---------------|-------|













**Title:** Comparative Multidimensional Molecular Analyses of Pediatric Diffuse Intrinsic Pontine Glioma Reveals Distinct Molecular Subtypes  
**Journal:** Acta Neuropathologica

Brennan Harmon, Jordan Hall, Eric H. Raabe, Ping An, Melanie Weingart, Brian Rood, Suresh Magge, Roger J. Packer, Javad Na

Javad Nazarian, Children's National Medical Center, Center for Genetic Medicine

Email: JNazarian@CNMC.org

p-                      FoldChange[10 p-                      FoldChange[111 p-

**Title:** Comparative Multidimensional Molecular Analyses of Pediatric Diffuse Intrinsic Pontine Glioma Reveals Distinct Molecular Subtypes  
**Journal:** *Acta Neuropathologica*

Javad Nazarian, Children's National Medical Center, Center for Genetic Medicine

Phone: 202-476-6022 Fax: 202-476-6014  
E-mail: [DMcGowan@CMBAC.com](mailto:DMcGowan@CMBAC.com)

foldChange10, p-

**Title:** Comparative Multidimensional Molecular Analyses of Pediatric Diffuse Intrinsic Pontine Glioma Reveals Distinct Molecular Subtypes  
**Journal:** Acta Neuropathologica

Brennan Harmon, Jordan Hall, Eric H. Raabe, Ping An, Melanie Weingart, Brian Rood, Suresh Magge, Roger J. Packer, Javad Naza

Javad Nazarian, Children's National Medical Center, Center for Genetic Medicine

111 Michigan Ave., NW, Washington DC, 20010  
Phone: 202-476-6022 Fax: 202-476-6014  
Email: JNazarian@CNMC.org

| Gene ID | p-value | FoldChange10 |  |  |  | FoldChange11 |  |  |  | FoldChange12 |  |  |  | FoldChange13 |  |  |  | FoldChange14 |  |  |  | FoldChange15 |  |  |  | FoldChange16 |  |  |  | FoldChange17 |  |  |  | FoldChange18 |  |  |  | FoldChange19 |  |  |  | FoldChange20 |  |  |  | FoldChange21 |  |  |  | FoldChange22 |  |  |  | FoldChange23 |  |  |  | FoldChange24 |  |  |  | FoldChange25 |  |  |  | FoldChange26 |  |  |  | FoldChange27 |  |  |  | FoldChange28 |  |  |  | FoldChange29 |  |  |  | FoldChange30 |  |  |  | FoldChange31 |  |  |  | FoldChange32 |  |  |  | FoldChange33 |  |  |  | FoldChange34 |  |  |  | FoldChange35 |  |  |  | FoldChange36 |  |  |  | FoldChange37 |  |  |  | FoldChange38 |  |  |  | FoldChange39 |  |  |  | FoldChange40 |  |  |  | FoldChange41 |  |  |  | FoldChange42 |  |  |  | FoldChange43 |  |  |  | FoldChange44 |  |  |  | FoldChange45 |  |  |  | FoldChange46 |  |  |  | FoldChange47 |  |  |  | FoldChange48 |  |  |  | FoldChange49 |  |  |  | FoldChange50 |  |  |  | FoldChange51 |  |  |  | FoldChange52 |  |  |  | FoldChange53 |  |  |  | FoldChange54 |  |  |  | FoldChange55 |  |  |  | FoldChange56 |  |  |  | FoldChange57 |  |  |  | FoldChange58 |  |  |  | FoldChange59 |  |  |  | FoldChange60 |  |  |  | FoldChange61 |  |  |  | FoldChange62 |  |  |  | FoldChange63 |  |  |  | FoldChange64 |  |  |  | FoldChange65 |  |  |  | FoldChange66 |  |  |  | FoldChange67 |  |  |  | FoldChange68 |  |  |  | FoldChange69 |  |  |  | FoldChange70 |  |  |  | FoldChange71 |  |  |  | FoldChange72 |  |  |  | FoldChange73 |  |  |  | FoldChange74 |  |  |  | FoldChange75 |  |  |  | FoldChange76 |  |  |  | FoldChange77 |  |  |  | FoldChange78 |  |  |  | FoldChange79 |  |  |  | FoldChange80 |  |  |  | FoldChange81 |  |  |  | FoldChange82 |  |  |  | FoldChange83 |  |  |  | FoldChange84 |  |  |  | FoldChange85 |  |  |  | FoldChange86 |  |  |  | FoldChange87 |  |  |  | FoldChange88 |  |  |  | FoldChange89 |  |  |  | FoldChange90 |  |  |  | FoldChange91 |  |  |  | FoldChange92 |  |  |  | FoldChange93 |  |  |  | FoldChange94 |  |  |  | FoldChange95 |  |  |  | FoldChange96 |  |  |  | FoldChange97 |  |  |  | FoldChange98 |  |  |  | FoldChange99 |  |  |  | FoldChange100 |  |  |  | FoldChange101 |  |  |  | FoldChange102 |  |  |  | FoldChange103 |  |  |  |  |
|---------|---------|--------------|--|--|--|--------------|--|--|--|--------------|--|--|--|--------------|--|--|--|--------------|--|--|--|--------------|--|--|--|--------------|--|--|--|--------------|--|--|--|--------------|--|--|--|--------------|--|--|--|--------------|--|--|--|--------------|--|--|--|--------------|--|--|--|--------------|--|--|--|--------------|--|--|--|--------------|--|--|--|--------------|--|--|--|--------------|--|--|--|--------------|--|--|--|--------------|--|--|--|--------------|--|--|--|--------------|--|--|--|--------------|--|--|--|--------------|--|--|--|--------------|--|--|--|--------------|--|--|--|--------------|--|--|--|--------------|--|--|--|--------------|--|--|--|--------------|--|--|--|--------------|--|--|--|--------------|--|--|--|--------------|--|--|--|--------------|--|--|--|--------------|--|--|--|--------------|--|--|--|--------------|--|--|--|--------------|--|--|--|--------------|--|--|--|--------------|--|--|--|--------------|--|--|--|--------------|--|--|--|--------------|--|--|--|--------------|--|--|--|--------------|--|--|--|--------------|--|--|--|--------------|--|--|--|--------------|--|--|--|--------------|--|--|--|--------------|--|--|--|--------------|--|--|--|--------------|--|--|--|--------------|--|--|--|--------------|--|--|--|--------------|--|--|--|--------------|--|--|--|--------------|--|--|--|--------------|--|--|--|--------------|--|--|--|--------------|--|--|--|--------------|--|--|--|--------------|--|--|--|--------------|--|--|--|--------------|--|--|--|--------------|--|--|--|--------------|--|--|--|--------------|--|--|--|--------------|--|--|--|--------------|--|--|--|--------------|--|--|--|--------------|--|--|--|--------------|--|--|--|--------------|--|--|--|--------------|--|--|--|--------------|--|--|--|--------------|--|--|--|--------------|--|--|--|--------------|--|--|--|--------------|--|--|--|--------------|--|--|--|--------------|--|--|--|--------------|--|--|--|--------------|--|--|--|--------------|--|--|--|--------------|--|--|--|--------------|--|--|--|--------------|--|--|--|--------------|--|--|--|--------------|--|--|--|--------------|--|--|--|---------------|--|--|--|---------------|--|--|--|---------------|--|--|--|---------------|--|--|--|--|
|---------|---------|--------------|--|--|--|--------------|--|--|--|--------------|--|--|--|--------------|--|--|--|--------------|--|--|--|--------------|--|--|--|--------------|--|--|--|--------------|--|--|--|--------------|--|--|--|--------------|--|--|--|--------------|--|--|--|--------------|--|--|--|--------------|--|--|--|--------------|--|--|--|--------------|--|--|--|--------------|--|--|--|--------------|--|--|--|--------------|--|--|--|--------------|--|--|--|--------------|--|--|--|--------------|--|--|--|--------------|--|--|--|--------------|--|--|--|--------------|--|--|--|--------------|--|--|--|--------------|--|--|--|--------------|--|--|--|--------------|--|--|--|--------------|--|--|--|--------------|--|--|--|--------------|--|--|--|--------------|--|--|--|--------------|--|--|--|--------------|--|--|--|--------------|--|--|--|--------------|--|--|--|--------------|--|--|--|--------------|--|--|--|--------------|--|--|--|--------------|--|--|--|--------------|--|--|--|--------------|--|--|--|--------------|--|--|--|--------------|--|--|--|--------------|--|--|--|--------------|--|--|--|--------------|--|--|--|--------------|--|--|--|--------------|--|--|--|--------------|--|--|--|--------------|--|--|--|--------------|--|--|--|--------------|--|--|--|--------------|--|--|--|--------------|--|--|--|--------------|--|--|--|--------------|--|--|--|--------------|--|--|--|--------------|--|--|--|--------------|--|--|--|--------------|--|--|--|--------------|--|--|--|--------------|--|--|--|--------------|--|--|--|--------------|--|--|--|--------------|--|--|--|--------------|--|--|--|--------------|--|--|--|--------------|--|--|--|--------------|--|--|--|--------------|--|--|--|--------------|--|--|--|--------------|--|--|--|--------------|--|--|--|--------------|--|--|--|--------------|--|--|--|--------------|--|--|--|--------------|--|--|--|--------------|--|--|--|--------------|--|--|--|--------------|--|--|--|--------------|--|--|--|--------------|--|--|--|--------------|--|--|--|--------------|--|--|--|--------------|--|--|--|--------------|--|--|--|--------------|--|--|--|--------------|--|--|--|--------------|--|--|--|---------------|--|--|--|---------------|--|--|--|---------------|--|--|--|---------------|--|--|--|--|

**Title:** Comparative Multidimensional Molecular Analyses of Pediatric Diffuse Intrinsic Pontine Glioma Reveals Distinct Molecular Subtypes

Javad Nazarian, Children's National Medical Center, Center for Genetic Medicine

Phone: 202-476-6022 Fax: 202-476-6014  
E-mail: [DMcGowan@CMB.GC.gov](mailto:DMcGowan@CMB.GC.gov)

| p: | FoldChange[10, p: | FoldChange[111, p: |
|----|-------------------|--------------------|
|----|-------------------|--------------------|

|       |   |          |          |               |   |         |         |             |   |          |           |               |          |         |         |             |   |          |          |               |   |          |         |               |   |         |         |             |   |          |          |             |          |         |          |   |
|-------|---|----------|----------|---------------|---|---------|---------|-------------|---|----------|-----------|---------------|----------|---------|---------|-------------|---|----------|----------|---------------|---|----------|---------|---------------|---|---------|---------|-------------|---|----------|----------|-------------|----------|---------|----------|---|
| SAR11 | 0 | 0.7/0.21 | -1.29/48 | 106 down vs n | 0 | 1.3/465 | 1.3/465 | 111 up vs n | 0 | 0.86/216 | -1.66/156 | 112 down vs n | 1.11e-42 | 1.0/385 | 1.0/385 | 121 up vs n | 0 | 0.1905/4 | -5.24/29 | 347 down vs n | 0 | 0.305/11 | 1.9/898 | 333 down vs n | 0 | 4.86/56 | 4.86/56 | 337 up vs n | 0 | 3.963/17 | 3.963/17 | 363 up vs n | 2.51E+15 | 20.3905 | 7.11E+15 | 1 |
|-------|---|----------|----------|---------------|---|---------|---------|-------------|---|----------|-----------|---------------|----------|---------|---------|-------------|---|----------|----------|---------------|---|----------|---------|---------------|---|---------|---------|-------------|---|----------|----------|-------------|----------|---------|----------|---|

**Journal:** Acta Neuropathologica

Javad Nazarian, Children's National Medical Center, Center for Genetic Medicine

Phone: 202-476-6022 Fax: 202-476-6014

|            | p         | FoldChange(6 vs. n) | MeanRatio | value[106] |            | FoldChange(6 vs. n) | MeanRatio           | value[111] | p |
|------------|-----------|---------------------|-----------|------------|------------|---------------------|---------------------|------------|---|
| value[106] | MeanRatio | FoldChange(6 vs. n) |           |            | value[111] | MeanRatio           | FoldChange(6 vs. n) |            |   |







**Authors:** Amanda M. Saratsis, Madhuri Kumbhampati, Kendall Snyder, Sridevi Yadavilli, Joe Devaney, Brennan Harmon, Jordan Hall, Eric H. Raabe, Ping An, Melanie Weingart, Brian Rood, Suresh Magge, Roger J. Packer, Javad Nazarian

**Corresponding Author:**  
Javad Nazarian, Children's National Medical Center, Center for Genetic Medicine  
111 Michigan Ave., NW, Washington DC, 20010  
Phone: 202-476-6022 Fax: 202-476-6014

| FoldChange101 |        |        |        |        |        |        |        |        |        | FoldChange111 |         |         |         |         |         |         |         |         |         | FoldChange121 |         |         |         |         |         |         |         |         |         | FoldChange131 |         |         |         |         |         |         |         |         |         | FoldChange141 |         |         |         |         |         |         |         |         |         | FoldChange151 |         |         |         |         |         |         |         |         |         | FoldChange161 |         |         |         |         |         |         |         |         |         |         |         |         |         |         |         |         |         |         |         |         |         |         |         |         |         |         |         |         |         |         |         |         |         |         |         |         |         |         |         |          |          |          |          |          |          |          |          |          |          |          |          |          |          |          |          |          |          |          |          |          |          |          |          |          |          |          |          |          |          |          |          |          |          |          |          |          |          |          |          |          |          |          |          |          |          |          |          |          |          |          |          |          |          |          |          |          |          |          |          |          |          |          |          |          |          |          |          |          |          |          |          |          |          |          |          |          |          |          |          |          |          |          |          |          |          |          |          |          |          |          |          |          |          |          |          |          |          |          |          |          |          |          |          |          |          |          |          |          |          |          |          |          |          |          |          |          |          |          |          |          |          |          |          |          |          |          |          |          |          |          |          |          |          |          |          |          |          |          |          |          |          |          |          |          |          |          |          |          |          |          |          |          |          |          |          |          |          |          |          |          |          |          |          |          |          |          |          |          |          |          |          |          |          |          |          |          |          |          |          |          |          |          |          |          |          |          |          |          |          |          |          |          |          |          |          |          |          |          |          |          |          |          |          |          |          |          |          |          |          |          |          |          |          |          |          |          |          |          |          |          |          |          |          |          |          |          |          |          |          |          |          |          |          |          |          |          |          |          |          |          |          |          |          |          |          |          |          |          |          |          |          |          |          |          |          |          |          |          |          |          |          |          |          |          |          |          |          |          |          |          |          |          |
|---------------|--------|--------|--------|--------|--------|--------|--------|--------|--------|---------------|---------|---------|---------|---------|---------|---------|---------|---------|---------|---------------|---------|---------|---------|---------|---------|---------|---------|---------|---------|---------------|---------|---------|---------|---------|---------|---------|---------|---------|---------|---------------|---------|---------|---------|---------|---------|---------|---------|---------|---------|---------------|---------|---------|---------|---------|---------|---------|---------|---------|---------|---------------|---------|---------|---------|---------|---------|---------|---------|---------|---------|---------|---------|---------|---------|---------|---------|---------|---------|---------|---------|---------|---------|---------|---------|---------|---------|---------|---------|---------|---------|---------|---------|---------|---------|---------|---------|---------|---------|---------|---------|----------|----------|----------|----------|----------|----------|----------|----------|----------|----------|----------|----------|----------|----------|----------|----------|----------|----------|----------|----------|----------|----------|----------|----------|----------|----------|----------|----------|----------|----------|----------|----------|----------|----------|----------|----------|----------|----------|----------|----------|----------|----------|----------|----------|----------|----------|----------|----------|----------|----------|----------|----------|----------|----------|----------|----------|----------|----------|----------|----------|----------|----------|----------|----------|----------|----------|----------|----------|----------|----------|----------|----------|----------|----------|----------|----------|----------|----------|----------|----------|----------|----------|----------|----------|----------|----------|----------|----------|----------|----------|----------|----------|----------|----------|----------|----------|----------|----------|----------|----------|----------|----------|----------|----------|----------|----------|----------|----------|----------|----------|----------|----------|----------|----------|----------|----------|----------|----------|----------|----------|----------|----------|----------|----------|----------|----------|----------|----------|----------|----------|----------|----------|----------|----------|----------|----------|----------|----------|----------|----------|----------|----------|----------|----------|----------|----------|----------|----------|----------|----------|----------|----------|----------|----------|----------|----------|----------|----------|----------|----------|----------|----------|----------|----------|----------|----------|----------|----------|----------|----------|----------|----------|----------|----------|----------|----------|----------|----------|----------|----------|----------|----------|----------|----------|----------|----------|----------|----------|----------|----------|----------|----------|----------|----------|----------|----------|----------|----------|----------|----------|----------|----------|----------|----------|----------|----------|----------|----------|----------|----------|----------|----------|----------|----------|----------|----------|----------|----------|----------|----------|----------|----------|----------|----------|----------|----------|----------|----------|----------|----------|----------|----------|----------|----------|----------|----------|----------|----------|----------|----------|----------|----------|----------|----------|----------|----------|----------|----------|----------|----------|----------|----------|----------|----------|----------|----------|----------|----------|----------|----------|----------|----------|----------|----------|----------|----------|----------|----------|----------|----------|----------|----------|----------|
| Gene ID       | vs. n1 | vs. n2 | vs. n3 | vs. n4 | vs. n5 | vs. n6 | vs. n7 | vs. n8 | vs. n9 | vs. n10       | vs. n11 | vs. n12 | vs. n13 | vs. n14 | vs. n15 | vs. n16 | vs. n17 | vs. n18 | vs. n19 | vs. n20       | vs. n21 | vs. n22 | vs. n23 | vs. n24 | vs. n25 | vs. n26 | vs. n27 | vs. n28 | vs. n29 | vs. n30       | vs. n31 | vs. n32 | vs. n33 | vs. n34 | vs. n35 | vs. n36 | vs. n37 | vs. n38 | vs. n39 | vs. n40       | vs. n41 | vs. n42 | vs. n43 | vs. n44 | vs. n45 | vs. n46 | vs. n47 | vs. n48 | vs. n49 | vs. n50       | vs. n51 | vs. n52 | vs. n53 | vs. n54 | vs. n55 | vs. n56 | vs. n57 | vs. n58 | vs. n59 | vs. n60       | vs. n61 | vs. n62 | vs. n63 | vs. n64 | vs. n65 | vs. n66 | vs. n67 | vs. n68 | vs. n69 | vs. n70 | vs. n71 | vs. n72 | vs. n73 | vs. n74 | vs. n75 | vs. n76 | vs. n77 | vs. n78 | vs. n79 | vs. n80 | vs. n81 | vs. n82 | vs. n83 | vs. n84 | vs. n85 | vs. n86 | vs. n87 | vs. n88 | vs. n89 | vs. n90 | vs. n91 | vs. n92 | vs. n93 | vs. n94 | vs. n95 | vs. n96 | vs. n97 | vs. n98 | vs. n99 | vs. n100 | vs. n101 | vs. n102 | vs. n103 | vs. n104 | vs. n105 | vs. n106 | vs. n107 | vs. n108 | vs. n109 | vs. n110 | vs. n111 | vs. n112 | vs. n113 | vs. n114 | vs. n115 | vs. n116 | vs. n117 | vs. n118 | vs. n119 | vs. n120 | vs. n121 | vs. n122 | vs. n123 | vs. n124 | vs. n125 | vs. n126 | vs. n127 | vs. n128 | vs. n129 | vs. n130 | vs. n131 | vs. n132 | vs. n133 | vs. n134 | vs. n135 | vs. n136 | vs. n137 | vs. n138 | vs. n139 | vs. n140 | vs. n141 | vs. n142 | vs. n143 | vs. n144 | vs. n145 | vs. n146 | vs. n147 | vs. n148 | vs. n149 | vs. n150 | vs. n151 | vs. n152 | vs. n153 | vs. n154 | vs. n155 | vs. n156 | vs. n157 | vs. n158 | vs. n159 | vs. n160 | vs. n161 | vs. n162 | vs. n163 | vs. n164 | vs. n165 | vs. n166 | vs. n167 | vs. n168 | vs. n169 | vs. n170 | vs. n171 | vs. n172 | vs. n173 | vs. n174 | vs. n175 | vs. n176 | vs. n177 | vs. n178 | vs. n179 | vs. n180 | vs. n181 | vs. n182 | vs. n183 | vs. n184 | vs. n185 | vs. n186 | vs. n187 | vs. n188 | vs. n189 | vs. n190 | vs. n191 | vs. n192 | vs. n193 | vs. n194 | vs. n195 | vs. n196 | vs. n197 | vs. n198 | vs. n199 | vs. n200 | vs. n201 | vs. n202 | vs. n203 | vs. n204 | vs. n205 | vs. n206 | vs. n207 | vs. n208 | vs. n209 | vs. n210 | vs. n211 | vs. n212 | vs. n213 | vs. n214 | vs. n215 | vs. n216 | vs. n217 | vs. n218 | vs. n219 | vs. n220 | vs. n221 | vs. n222 | vs. n223 | vs. n224 | vs. n225 | vs. n226 | vs. n227 | vs. n228 | vs. n229 | vs. n230 | vs. n231 | vs. n232 | vs. n233 | vs. n234 | vs. n235 | vs. n236 | vs. n237 | vs. n238 | vs. n239 | vs. n240 | vs. n241 | vs. n242 | vs. n243 | vs. n244 | vs. n245 | vs. n246 | vs. n247 | vs. n248 | vs. n249 | vs. n250 | vs. n251 | vs. n252 | vs. n253 | vs. n254 | vs. n255 | vs. n256 | vs. n257 | vs. n258 | vs. n259 | vs. n260 | vs. n261 | vs. n262 | vs. n263 | vs. n264 | vs. n265 | vs. n266 | vs. n267 | vs. n268 | vs. n269 | vs. n270 | vs. n271 | vs. n272 | vs. n273 | vs. n274 | vs. n275 | vs. n276 | vs. n277 | vs. n278 | vs. n279 | vs. n280 | vs. n281 | vs. n282 | vs. n283 | vs. n284 | vs. n285 | vs. n286 | vs. n287 | vs. n288 | vs. n289 | vs. n290 | vs. n291 | vs. n292 | vs. n293 | vs. n294 | vs. n295 | vs. n296 | vs. n297 | vs. n298 | vs. n299 | vs. n300 | vs. n301 | vs. n302 | vs. n303 | vs. n304 | vs. n305 | vs. n306 | vs. n307 | vs. n308 | vs. n309 | vs. n310 | vs. n311 | vs. n312 | vs. n313 | vs. n314 | vs. n315 | vs. n316 | vs. n317 | vs. n318 | vs. n319 | vs. n320 | vs. n321 | vs. n322 | vs. n323 | vs. n324 | vs. n325 | vs. n326 | vs. n327 | vs. n328 | vs. n329 | vs. n330 | vs. n331 | vs. n332 | vs. n333 | vs. n334 | vs. n335 | vs. n336 | vs. n337 | vs. n338 | vs. n339 | vs. n340 | vs. n341 | vs. n342 | vs. n343 | vs. n344 | vs. n345 | vs. n346 | vs. n347 | vs. n348 | vs. n349 | vs. n350 | vs. n351 | vs. n352 | vs. n353 | vs. n354 | vs. n355 | vs. n356 | vs. n357 | vs. n358 | vs. n359 | vs. n360 | vs. n361 | vs. n362 | vs. n363 | vs. n364 | vs. n365 | vs. n366 | vs. n367 | vs. n368 | vs. n369 | vs. n370 | vs. n371 | vs. n372 |



Javad Nazarian, Children's National Medical Center, Center for Genetic Medicine

Phone: 202-476-6022 Fax: 202-476-6014

| value(106 | MeanRatio | FoldChange( 6 vs. n) | value(111 | MeanRatio | FoldChange( vs. n) | value(11 |
|-----------|-----------|----------------------|-----------|-----------|--------------------|----------|
|-----------|-----------|----------------------|-----------|-----------|--------------------|----------|

[illegible]













Javad Nazarian, Children's National Medical Center, Center for Genetic Medicine

| Geno | ID | FoldChange10 |  |  |  | FoldChange11 |  |  |  | FoldChange12 |  |  |  | FoldChange13 |  |  |  | FoldChange14 |  |  |  | FoldChange15 |  |  |  | FoldChange16 |  |  |  | FoldChange17 |  |  |  | FoldChange18 |  |  |  | FoldChange19 |  |  |  | FoldChange20 |  |  |  | FoldChange21 |  |  |  | FoldChange22 |  |  |  | FoldChange23 |  |  |  | FoldChange24 |  |  |  | FoldChange25 |  |  |  | FoldChange26 |  |  |  | FoldChange27 |  |  |  | FoldChange28 |  |  |  | FoldChange29 |  |  |  | FoldChange30 |  |  |  | FoldChange31 |  |  |  | FoldChange32 |  |  |  | FoldChange33 |  |  |  | FoldChange34 |  |  |  | FoldChange35 |  |  |  | FoldChange36 |  |  |  | FoldChange37 |  |  |  | FoldChange38 |  |  |  | FoldChange39 |  |  |  | FoldChange40 |  |  |  | FoldChange41 |  |  |  | FoldChange42 |  |  |  | FoldChange43 |  |  |  | FoldChange44 |  |  |  | FoldChange45 |  |  |  | FoldChange46 |  |  |  | FoldChange47 |  |  |  | FoldChange48 |  |  |  | FoldChange49 |  |  |  | FoldChange50 |  |  |  | FoldChange51 |  |  |  | FoldChange52 |  |  |  | FoldChange53 |  |  |  | FoldChange54 |  |  |  | FoldChange55 |  |  |  | FoldChange56 |  |  |  | FoldChange57 |  |  |  | FoldChange58 |  |  |  | FoldChange59 |  |  |  | FoldChange60 |  |  |  | FoldChange61 |  |  |  | FoldChange62 |  |  |  | FoldChange63 |  |  |  | FoldChange64 |  |  |  | FoldChange65 |  |  |  | FoldChange66 |  |  |  | FoldChange67 |  |  |  | FoldChange68 |  |  |  | FoldChange69 |  |  |  | FoldChange70 |  |  |  | FoldChange71 |  |  |  | FoldChange72 |  |  |  | FoldChange73 |  |  |  | FoldChange74 |  |  |  | FoldChange75 |  |  |  | FoldChange76 |  |  |  | FoldChange77 |  |  |  | FoldChange78 |  |  |  | FoldChange79 |  |  |  | FoldChange80 |  |  |  | FoldChange81 |  |  |  | FoldChange82 |  |  |  | FoldChange83 |  |  |  | FoldChange84 |  |  |  | FoldChange85 |  |  |  | FoldChange86 |  |  |  | FoldChange87 |  |  |  | FoldChange88 |  |  |  | FoldChange89 |  |  |  | FoldChange90 |  |  |  | FoldChange91 |  |  |  | FoldChange92 |  |  |  | FoldChange93 |  |  |  | FoldChange94 |  |  |  | FoldChange95 |  |  |  | FoldChange96 |  |  |  | FoldChange97 |  |  |  | FoldChange98 |  |  |  | FoldChange99 |  |  |  | FoldChange100 |  |  |  | FoldChange101 |  |  |  | FoldChange102 |  |  |  | FoldChange103 |  |  |  | Fold |
|------|----|--------------|--|--|--|--------------|--|--|--|--------------|--|--|--|--------------|--|--|--|--------------|--|--|--|--------------|--|--|--|--------------|--|--|--|--------------|--|--|--|--------------|--|--|--|--------------|--|--|--|--------------|--|--|--|--------------|--|--|--|--------------|--|--|--|--------------|--|--|--|--------------|--|--|--|--------------|--|--|--|--------------|--|--|--|--------------|--|--|--|--------------|--|--|--|--------------|--|--|--|--------------|--|--|--|--------------|--|--|--|--------------|--|--|--|--------------|--|--|--|--------------|--|--|--|--------------|--|--|--|--------------|--|--|--|--------------|--|--|--|--------------|--|--|--|--------------|--|--|--|--------------|--|--|--|--------------|--|--|--|--------------|--|--|--|--------------|--|--|--|--------------|--|--|--|--------------|--|--|--|--------------|--|--|--|--------------|--|--|--|--------------|--|--|--|--------------|--|--|--|--------------|--|--|--|--------------|--|--|--|--------------|--|--|--|--------------|--|--|--|--------------|--|--|--|--------------|--|--|--|--------------|--|--|--|--------------|--|--|--|--------------|--|--|--|--------------|--|--|--|--------------|--|--|--|--------------|--|--|--|--------------|--|--|--|--------------|--|--|--|--------------|--|--|--|--------------|--|--|--|--------------|--|--|--|--------------|--|--|--|--------------|--|--|--|--------------|--|--|--|--------------|--|--|--|--------------|--|--|--|--------------|--|--|--|--------------|--|--|--|--------------|--|--|--|--------------|--|--|--|--------------|--|--|--|--------------|--|--|--|--------------|--|--|--|--------------|--|--|--|--------------|--|--|--|--------------|--|--|--|--------------|--|--|--|--------------|--|--|--|--------------|--|--|--|--------------|--|--|--|--------------|--|--|--|--------------|--|--|--|--------------|--|--|--|--------------|--|--|--|--------------|--|--|--|--------------|--|--|--|--------------|--|--|--|--------------|--|--|--|--------------|--|--|--|--------------|--|--|--|--------------|--|--|--|--------------|--|--|--|--------------|--|--|--|--------------|--|--|--|---------------|--|--|--|---------------|--|--|--|---------------|--|--|--|---------------|--|--|--|------|
|------|----|--------------|--|--|--|--------------|--|--|--|--------------|--|--|--|--------------|--|--|--|--------------|--|--|--|--------------|--|--|--|--------------|--|--|--|--------------|--|--|--|--------------|--|--|--|--------------|--|--|--|--------------|--|--|--|--------------|--|--|--|--------------|--|--|--|--------------|--|--|--|--------------|--|--|--|--------------|--|--|--|--------------|--|--|--|--------------|--|--|--|--------------|--|--|--|--------------|--|--|--|--------------|--|--|--|--------------|--|--|--|--------------|--|--|--|--------------|--|--|--|--------------|--|--|--|--------------|--|--|--|--------------|--|--|--|--------------|--|--|--|--------------|--|--|--|--------------|--|--|--|--------------|--|--|--|--------------|--|--|--|--------------|--|--|--|--------------|--|--|--|--------------|--|--|--|--------------|--|--|--|--------------|--|--|--|--------------|--|--|--|--------------|--|--|--|--------------|--|--|--|--------------|--|--|--|--------------|--|--|--|--------------|--|--|--|--------------|--|--|--|--------------|--|--|--|--------------|--|--|--|--------------|--|--|--|--------------|--|--|--|--------------|--|--|--|--------------|--|--|--|--------------|--|--|--|--------------|--|--|--|--------------|--|--|--|--------------|--|--|--|--------------|--|--|--|--------------|--|--|--|--------------|--|--|--|--------------|--|--|--|--------------|--|--|--|--------------|--|--|--|--------------|--|--|--|--------------|--|--|--|--------------|--|--|--|--------------|--|--|--|--------------|--|--|--|--------------|--|--|--|--------------|--|--|--|--------------|--|--|--|--------------|--|--|--|--------------|--|--|--|--------------|--|--|--|--------------|--|--|--|--------------|--|--|--|--------------|--|--|--|--------------|--|--|--|--------------|--|--|--|--------------|--|--|--|--------------|--|--|--|--------------|--|--|--|--------------|--|--|--|--------------|--|--|--|--------------|--|--|--|--------------|--|--|--|--------------|--|--|--|--------------|--|--|--|--------------|--|--|--|--------------|--|--|--|--------------|--|--|--|--------------|--|--|--|--------------|--|--|--|---------------|--|--|--|---------------|--|--|--|---------------|--|--|--|---------------|--|--|--|------|







Javad Nazarian, Children's National Medical Center, Center for Genetic Medicine

Email: JNazarian@CNMC.org











**Title:** Comparative Multidimensional Molecular Analyses of Pediatric Diffuse Intrinsic Pontine Glioma Reveals Distinct Molecular Subtypes  
**Journal:** Acta Neuropathologica

**Corresponding Author:**  
Javad Nazarian, Children's National Medical Center, Center for Genetic Medicine

111 Michigan Ave., NW, Washington DC, 20010  
Phone: 202-476-6022 Fax: 202-476-6014  
Email: JNazarian@CNMC.org

| Gene ID | Value(106 vs. n) | MeanRatio (106 vs. n) | FoldChange (106 vs. n) | 6 vs. n (Description) | Value(111 vs. n) | MeanRatio (111 vs. n) | FoldChange (111 vs. n) | 111 vs. n (Description) | Value(111 vs. n) |
|---------|------------------|-----------------------|------------------------|-----------------------|------------------|-----------------------|------------------------|-------------------------|------------------|
| SRMS    | 0                | 1.25716               | 1.25716                | 106 up vs n           | 0                | 2.74562               | 2.74562                | 111 up vs n             | 0                |

|         |          |          |               |         |         |             |          |          |               |          |          |               |          |          |               |         |          |               |          |          |               |
|---------|----------|----------|---------------|---------|---------|-------------|----------|----------|---------------|----------|----------|---------------|----------|----------|---------------|---------|----------|---------------|----------|----------|---------------|
| STIGALS | 0.584997 | -1.70941 | 106 down vs n | 1.79204 | 1.79204 | 111 up vs n | 0.533392 | -1.74749 | 112 down vs n | 0.681192 | -1.56629 | 121 down vs n | 0.155045 | -6.44975 | 347 down vs n | 0.30999 | -2.70278 | 353 down vs n | 0.14244  | 4.55539  | 537 up vs n   |
| STIGALS | 0.237512 | -3.88918 | 106 down vs n | 6.71239 | 6.71239 | 111 up vs n | 2.06782  | 2.06782  | 112 down vs n | 0.759754 | -1.31622 | 121 down vs n | 0.251992 | -4.43237 | 347 down vs n | 0.75409 | -3.26218 | 353 down vs n | 0.45549  | 4.55539  | 537 up vs n   |
|         |          |          |               |         |         |             |          |          |               |          |          |               |          |          |               |         |          |               | 0.408749 | 4.08749  | 563 up vs n   |
|         |          |          |               |         |         |             |          |          |               |          |          |               |          |          |               |         |          |               | 9.70E-14 | 11.8146  | 1.07E-14      |
|         |          |          |               |         |         |             |          |          |               |          |          |               |          |          |               |         |          |               | 0.921369 | -1.08534 | 563 down vs n |
|         |          |          |               |         |         |             |          |          |               |          |          |               |          |          |               |         |          |               |          | 43.887   | 1.07E-14      |











111 Michigan Ave., NW, Washington DC, 20010  
Phone: 202-476-6022 Fax: 202-476-6014  
Email: JNazarian@CNMC.org

value(106 Ms











**Title:** Comparative Multidimensional Molecular Analyses of Pediatric Diffuse Intrinsic Pontine Glioma Reveals Distinct Molecular Subtypes  
**Journal:** Acta Neuropathologica

Brannon Harmon, Jordan Hall, Eric H. Reaba, Bing

Brennan Harmon, Jordan Hall, Eric H. Raabe, Ping An, Melanie Weingart, Brian Rood, Suresh Magge, Roger J. Packer, Javad I.

**Corresponding Author:**

\*\*\*Mushinova, Anna. NIH, Bethesda, MD, 2004.

Phone: 202-476-6022 Fax: 202-476-6014

| value(106 | MeanRatio | FoldChange( | 6 vs. n) | value(111 | MeanRatio | FoldChange( | vs. n) | v |
|-----------|-----------|-------------|----------|-----------|-----------|-------------|--------|---|
|-----------|-----------|-------------|----------|-----------|-----------|-------------|--------|---|

File: ESM\_10 (Online Resource 10)

Title: Comparing Multidimensional Molecular Analyses of Pediatric Diffuse Intrinsic Glioma Reveals Distinct Molecular Subtypes

Journal: Acta Neurochirurgica

Authors: Amanda M. Stransik, Madhuri Kumbhakar, Kendall Snyder, Sidicki Yavuz, Joe Devenney,

Breanna Harmon, Jordan Hall, Eric H. Rubie, Ping An, Melanie Weingart, Brian Ross, Sarah Magee, Roger J. Packer, Javad Nazarian

Corresponding Author:

Javad Nazarian, Children's National Medical Center, Center for Genetic Medicine,

111 Michigan Ave., NW, Washington DC, 20010

Phone: 202-476-6022 Fax: 202-476-6014

Email: J.Nazarian@CNMC.org

| p-value[106] |  | MeanRatio | FoldChange[106] | p-value[107] | MeanRatio | FoldChange[107] | p-value[108] | MeanRatio | FoldChange[108] | p-value[109] | MeanRatio | FoldChange[109] | p-value[110] | MeanRatio | FoldChange[110] | p-value[111] | MeanRatio | FoldChange[111] | p-value[112] | MeanRatio | FoldChange[112] | p-value[113] | MeanRatio | FoldChange[113] | p-value[114] | MeanRatio | FoldChange[114] | p-value[115] | MeanRatio | FoldChange[115] | p-value[116] | MeanRatio | FoldChange[116] | p-value[117] | MeanRatio | FoldChange[117] | p-value[118] | MeanRatio | FoldChange[118] | p-value[119] | MeanRatio | FoldChange[119] | p-value[120] | MeanRatio | FoldChange[120] | p-value[121] | MeanRatio | FoldChange[121] | p-value[122] | MeanRatio | FoldChange[122] | p-value[123] | MeanRatio | FoldChange[123] | p-value[124] | MeanRatio | FoldChange[124] | p-value[125] | MeanRatio | FoldChange[125] | p-value[126] | MeanRatio | FoldChange[126] | p-value[127] | MeanRatio | FoldChange[127] | p-value[128] | MeanRatio | FoldChange[128] | p-value[129] | MeanRatio | FoldChange[129] | p-value[130] | MeanRatio | FoldChange[130] | p-value[131] | MeanRatio | FoldChange[131] | p-value[132] | MeanRatio | FoldChange[132] | p-value[133] | MeanRatio | FoldChange[133] | p-value[134] | MeanRatio | FoldChange[134] | p-value[135] | MeanRatio | FoldChange[135] | p-value[136] | MeanRatio | FoldChange[136] | p-value[137] | MeanRatio | FoldChange[137] | p-value[138] | MeanRatio | FoldChange[138] | p-value[139] | MeanRatio | FoldChange[139] | p-value[140] | MeanRatio | FoldChange[140] | p-value[141] | MeanRatio | FoldChange[141] | p-value[142] | MeanRatio | FoldChange[142] | p-value[143] | MeanRatio | FoldChange[143] | p-value[144] | MeanRatio | FoldChange[144] | p-value[145] | MeanRatio | FoldChange[145] | p-value[146] | MeanRatio | FoldChange[146] | p-value[147] | MeanRatio | FoldChange[147] | p-value[148] | MeanRatio | FoldChange[148] | p-value[149] | MeanRatio | FoldChange[149] | p-value[150] | MeanRatio | FoldChange[150] | p-value[151] | MeanRatio | FoldChange[151] | p-value[152] | MeanRatio | FoldChange[152] | p-value[153] | MeanRatio | FoldChange[153] | p-value[154] | MeanRatio | FoldChange[154] | p-value[155] | MeanRatio | FoldChange[155] | p-value[156] | MeanRatio | FoldChange[156] | p-value[157] | MeanRatio | FoldChange[157] | p-value[158] | MeanRatio | FoldChange[158] | p-value[159] | MeanRatio | FoldChange[159] | p-value[160] | MeanRatio | FoldChange[160] | p-value[161] | MeanRatio | FoldChange[161] | p-value[162] | MeanRatio | FoldChange[162] | p-value[163] | MeanRatio | FoldChange[163] | p-value[164] | MeanRatio | FoldChange[164] | p-value[165] | MeanRatio | FoldChange[165] | p-value[166] | MeanRatio | FoldChange[166] | p-value[167] | MeanRatio | FoldChange[167] | p-value[168] | MeanRatio | FoldChange[168] | p-value[169] | MeanRatio | FoldChange[169] | p-value[170] | MeanRatio | FoldChange[170] | p-value[171] | MeanRatio | FoldChange[171] | p-value[172] | MeanRatio | FoldChange[172] | p-value[173] | MeanRatio | FoldChange[173] | p-value[174] | MeanRatio | FoldChange[174] | p-value[175] | MeanRatio | FoldChange[175] | p-value[176] | MeanRatio | FoldChange[176] | p-value[177] | MeanRatio | FoldChange[177] | p-value[178] | MeanRatio | FoldChange[178] | p-value[179] | MeanRatio | FoldChange[179] | p-value[180] | MeanRatio | FoldChange[180] | p-value[181] | MeanRatio | FoldChange[181] | p-value[182] | MeanRatio | FoldChange[182] | p-value[183] | MeanRatio | FoldChange[183] | p-value[184] | MeanRatio | FoldChange[184] | p-value[185] | MeanRatio | FoldChange[185] | p-value[186] | MeanRatio | FoldChange[186] | p-value[187] | MeanRatio | FoldChange[187] | p-value[188] | MeanRatio | FoldChange[188] | p-value[189] | MeanRatio | FoldChange[189] | p-value[190] | MeanRatio | FoldChange[190] | p-value[191] | MeanRatio | FoldChange[191] | p-value[192] | MeanRatio | FoldChange[192] | p-value[193] | MeanRatio | FoldChange[193] | p-value[194] | MeanRatio | FoldChange[194] | p-value[195] | MeanRatio | FoldChange[195] | p-value[196] | MeanRatio | FoldChange[196] | p-value[197] | MeanRatio | FoldChange[197] | p-value[198] | MeanRatio | FoldChange[198] | p-value[199] | MeanRatio | FoldChange[199] | p-value[200] | MeanRatio | FoldChange[200] | p-value[201] | MeanRatio | FoldChange[201] | p-value[202] | MeanRatio | FoldChange[202] | p-value[203] | MeanRatio | FoldChange[203] | p-value[204] | MeanRatio | FoldChange[204] | p-value[205] | MeanRatio | FoldChange[205] | p-value[206] | MeanRatio | FoldChange[206] | p-value[207] | MeanRatio | FoldChange[207] | p-value[208] | MeanRatio | FoldChange[208] | p-value[209] | MeanRatio | FoldChange[209] | p-value[210] | MeanRatio | FoldChange[210] | p-value[211] | MeanRatio | FoldChange[211] | p-value[212] | MeanRatio | FoldChange[212] | p-value[213] | MeanRatio | FoldChange[213] | p-value[214] | MeanRatio | FoldChange[214] | p-value[215] | MeanRatio | FoldChange[215] | p-value[216] | MeanRatio | FoldChange[216] | p-value[217] | MeanRatio | FoldChange[217] | p-value[218] | MeanRatio | FoldChange[218] | p-value[219] | MeanRatio | FoldChange[219] | p-value[220] | MeanRatio | FoldChange[220] | p-value[221] | MeanRatio | FoldChange[221] | p-value[222] | MeanRatio | FoldChange[222] | p-value[223] | MeanRatio | FoldChange[223] | p-value[224] | MeanRatio | FoldChange[224] | p-value[225] | MeanRatio | FoldChange[225] | p-value[226] | MeanRatio | FoldChange[226] | p-value[227] | MeanRatio | FoldChange[227] | p-value[228] | MeanRatio | FoldChange[228] | p-value[229] | MeanRatio | FoldChange[229] | p-value[230] | MeanRatio | FoldChange[230] | p-value[231] | MeanRatio | FoldChange[231] | p-value[232] | MeanRatio | FoldChange[232] | p-value[233] | MeanRatio | FoldChange[233] | p-value[234] | MeanRatio | FoldChange[234] | p-value[235] | MeanRatio | FoldChange[235] | p-value[236] | MeanRatio | FoldChange[236] | p-value[237] | MeanRatio | FoldChange[237] | p-value[238] | MeanRatio | FoldChange[238] | p-value[239] | MeanRatio | FoldChange[239] | p-value[240] | MeanRatio | FoldChange[240] | p-value[241] | MeanRatio | FoldChange[241] | p-value[242] | MeanRatio | FoldChange[242] | p-value[243] | MeanRatio | FoldChange[243] | p-value[244] | MeanRatio | FoldChange[244] | p-value[245] | MeanRatio | FoldChange[245] | p-value[246] | MeanRatio | FoldChange[246] | p-value[247] | MeanRatio | FoldChange[247] | p-value[248] | MeanRatio | FoldChange[248] | p-value[249] | MeanRatio | FoldChange[249] | p-value[250] | MeanRatio | FoldChange[250] | p-value[251] | MeanRatio | FoldChange[251] | p-value[252] | MeanRatio | FoldChange[252] | p-value[253] | MeanRatio | FoldChange[253] | p-value[254] | MeanRatio | FoldChange[254] | p-value[255] | MeanRatio | FoldChange[255] | p-value[256] | MeanRatio | FoldChange[256] | p-value[257] | MeanRatio | FoldChange[257] | p-value[258] | MeanRatio | FoldChange[258] | p-value[259] | MeanRatio | FoldChange[259] | p-value[260] | MeanRatio | FoldChange[260] | p-value[261] | MeanRatio | FoldChange[261] | p-value[262] | MeanRatio | FoldChange[262] | p-value[263] | MeanRatio | FoldChange[263] | p-value[264] | MeanRatio | FoldChange[264] | p-value[265] | MeanRatio | FoldChange[265] | p-value[266] | MeanRatio | FoldChange[266] | p-value[267] | MeanRatio | FoldChange[267] | p-value[268] | MeanRatio | FoldChange[268] | p-value[269] | MeanRatio | FoldChange[269] | p-value[270] | MeanRatio | FoldChange[270] | p-value[271] | MeanRatio | FoldChange[271] | p-value[272] | MeanRatio | FoldChange[272] | p-value[273] | MeanRatio | FoldChange[273] | p-value[274] | MeanRatio | FoldChange[274] | p-value[275] | MeanRatio | FoldChange[275] | p-value[276] | MeanRatio | FoldChange[276] | p-value[277] | MeanRatio | FoldChange[277] | p-value[278] | MeanRatio | FoldChange[278] | p-value[279] | MeanRatio | FoldChange[279] | p-value[280] | MeanRatio | FoldChange[280] | p-value[281] | MeanRatio | FoldChange[281] | p-value[282] | MeanRatio | FoldChange[282] | p-value[283] | MeanRatio | FoldChange[283] | p-value[284] | MeanRatio | FoldChange[284] | p-value[285] | MeanRatio | FoldChange[285] | p-value[286] | MeanRatio | FoldChange[286] | p-value[287] | MeanRatio | FoldChange[287] | p-value[288] | MeanRatio | FoldChange[288] | p-value[289] | MeanRatio | FoldChange[289] | p-value[290] | MeanRatio | FoldChange[290] | p-value[291] | MeanRatio | FoldChange[291] | p-value[292] | MeanRatio | FoldChange[292] | p-value[293] | MeanRatio | FoldChange[293] | p-value[294] | MeanRatio | FoldChange[294] | p-value[295] | MeanRatio | FoldChange[295] | p-value[296] | MeanRatio | FoldChange[296] | p-value[297] | MeanRatio | FoldChange[297] | p-value[298] | MeanRatio | FoldChange[298] | p-value[299] | MeanRatio | FoldChange[299] | p-value[300] | MeanRatio | FoldChange[300] | p-value[301] | MeanRatio | FoldChange[301] | p-value[302] | MeanRatio | FoldChange[302] | p-value[303] | MeanRatio | FoldChange[303] | p-value[304] | MeanRatio | FoldChange[304] | p-value[305] | MeanRatio | FoldChange[305] | p-value[306] | MeanRatio | FoldChange[306] | p-value[307] | MeanRatio | FoldChange[307] | p-value[308] | MeanRatio | FoldChange[308] | p-value[309] | MeanRatio | FoldChange[309] | p-value[310] | MeanRatio | FoldChange[310] | p-value[311] | MeanRatio | FoldChange[311] | p-value[312] | MeanRatio | FoldChange[312] | p-value[313] | MeanRatio | FoldChange[313] | p-value[314] | MeanRatio | FoldChange[314] | p-value[315] | MeanRatio | FoldChange[315] | p-value[316] | MeanRatio | FoldChange[316] | p-value[317] | MeanRatio | FoldChange[317] | p-value[318] | MeanRatio | FoldChange[318] | p-value[319] | MeanRatio | FoldChange[319] | p-value[320] | MeanRatio | FoldChange[320] | p-value[321] | MeanRatio | FoldChange[321] | p-value[322] | MeanRatio | FoldChange[322] | p-value[323] | MeanRatio | FoldChange[323] | p-value[324] | MeanRatio | FoldChange[324] | p-value[325] | MeanRatio | FoldChange[325] | p-value[326] | MeanRatio | FoldChange[326] | p-value[327] | MeanRatio | FoldChange[327] | p-value[328] | MeanRatio | FoldChange[328] | p-value[329] | MeanRatio | FoldChange[329] | p-value[330] | MeanRatio | FoldChange[330] | p-value[331] | MeanRatio | FoldChange[331] | p-value[332] | MeanRatio | FoldChange[332] | p-value[333] | MeanRatio | FoldChange[333] | p-value[334] | MeanRatio | FoldChange[334] | p-value[335] | MeanRatio | FoldChange[335] | p-value[336] | MeanRatio | FoldChange[336] | p-value[337] | MeanRatio | FoldChange[337] | p-value[338] | MeanRatio | FoldChange[338] | p-value[339] | MeanRatio | FoldChange[339] | p-value[340] | MeanRatio | FoldChange[340] | p-value[341] | MeanRatio | FoldChange[341] | p-value[342] | MeanRatio | FoldChange[342] | p-value[343] | MeanRatio | FoldChange[343] | p-value[344] | MeanRatio | FoldChange[344] | p-value[345] | MeanRatio | FoldChange[345] | p-value[346] | MeanRatio | FoldChange[346] | p-value[347] | MeanRatio | FoldChange[347] | p-value[348] | MeanRatio | FoldChange[348] | p-value[349] | MeanRatio | FoldChange[349] | p-value[350] | MeanRatio | FoldChange[350] | p-value[351] | MeanRatio | FoldChange[351] | p-value[352] | MeanRatio | FoldChange[352] | p-value[353] | MeanRatio | FoldChange[353] | p-value[354] | MeanRatio | FoldChange[354] | p-value[355] | MeanRatio | FoldChange[355] | p-value[356] | MeanRatio | FoldChange[356] | p-value[357] | MeanRatio | FoldChange[357] | p-value[358] | MeanRatio | FoldChange[358] | p-value[359] | MeanRatio | FoldChange[359] | p-value[360] | MeanRatio | FoldChange[360] | p-value[361] | MeanRatio | FoldChange[361] | p-value[362] | MeanRatio | FoldChange[362] | p-value[363] | MeanRatio | FoldChange[363] | p-value[364] | MeanRatio | FoldChange[364] | p-value[365] | MeanRatio | FoldChange[365] | p-value[366] | MeanRatio | FoldChange[366] | p-value[367] | MeanRatio | FoldChange[367] | p-value[368] | MeanRatio | FoldChange[368] | p-value[369] | MeanRatio | FoldChange[369] | p-value[370] | MeanRatio | FoldChange[370] | p-value[371] | MeanRatio | FoldChange[371] | p-value[372] | MeanRatio | FoldChange[372] | p-value[373] | MeanRatio | FoldChange[373] | p-value[374] | MeanRatio | FoldChange[374] | p-value[375] | MeanRatio | FoldChange[375] | p-value[376] | MeanRatio | FoldChange[376] | p-value[377] | MeanRatio | FoldChange[377] | p-value[378] | MeanRatio | FoldChange[378] | p-value[379] | MeanRatio | FoldChange[379] | p-value[380] | MeanRatio | FoldChange[380] | p-value[381] | MeanRatio | FoldChange[381] | p-value[382] | MeanRatio | FoldChange[382] | p-value[383] | MeanRatio | FoldChange[383] | p-value[384] | MeanRatio | FoldChange[384] | p-value[385] | MeanRatio | FoldChange[385] | p-value[386] | MeanRatio | FoldChange[386] | p-value[387] | MeanRatio | FoldChange[387] | p-value[388] | MeanRatio | FoldChange[388] | p-value[389] | MeanRatio | FoldChange[389] | p-value[390] | MeanRatio | FoldChange[390] | p-value[391] | MeanRatio | FoldChange[391] | p-value[392] | MeanRatio | FoldChange[392] | p-value[393] | MeanRatio | FoldChange[393] | p-value[394] | MeanRatio | FoldChange[394] | p-value[395] | MeanRatio | FoldChange[395] | p-value[396] | MeanRatio | FoldChange[396] | p-value[397] | MeanRatio | FoldChange[397] | p-value[398] | MeanRatio | FoldChange[398] | p-value[399] | MeanRatio | FoldChange[399] | p-value[400] | MeanRatio | FoldChange[400] | p-value[401] | MeanRatio | FoldChange[401] | p-value[402] | MeanRatio | FoldChange[402] | p-value[403] | MeanRatio | FoldChange[403] | p-value[404] | MeanRatio | FoldChange[404] | p-value[405] | MeanRatio | FoldChange[405] | p-value[406] | MeanRatio | FoldChange[406] | p-value[407] | MeanRatio | FoldChange[407] | p-value[408] | MeanRatio | FoldChange[408] | p-value[409] | MeanRatio | FoldChange[409] | p-value[410] | MeanRatio | FoldChange[410] | p-value[411] | MeanRatio | FoldChange[411] | p-value[412] | MeanRatio | FoldChange[412] | p-value[413] | MeanRatio | FoldChange[413] | p-value[414] | MeanRatio | FoldChange[414] | p-value[415] | MeanRatio | FoldChange[415] | p-value[416] | MeanRatio | FoldChange[416] | p-value[417] | MeanRatio | FoldChange[417] | p-value[418] | MeanRatio | FoldChange[418] | p-value[419] | MeanRatio | FoldChange[419] | p-value[420] | MeanRatio | FoldChange[420] | p-value[421] | MeanRatio | FoldChange[421] | p-value[422] | MeanRatio | FoldChange[422] | p-value[423] | MeanRatio | FoldChange[423] | p-value[424] | MeanRatio | FoldChange[424] | p-value[425] | MeanRatio | FoldChange[425] | p-value[426] | MeanRatio | FoldChange[426] | p-value[427] | MeanRatio | FoldChange[427] | p-value[428] | MeanRatio | FoldChange[428] | p-value[429] | MeanRatio | FoldChange[429] | p-value[430] | MeanRatio | FoldChange[430] | p-value[431] | MeanRatio | FoldChange[431] | p-value[432] | MeanRatio | FoldChange[432] | p-value[433] | MeanRatio | FoldChange[433] | p-value[434] | MeanRatio | FoldChange[434] | p-value[435] | MeanRatio | FoldChange[435] | p-value[436] | MeanRatio | FoldChange[436] | p-value[437] | MeanRatio | FoldChange[437] | p-value[438] | MeanRatio | FoldChange[438] | p-value[439] | MeanRatio | FoldChange[439] | p-value[440] | MeanRatio | FoldChange[440] | p-value[441] | MeanRatio | FoldChange[441] | p-value[442] | MeanRatio | FoldChange[442] | p-value[443] | MeanRatio | FoldChange[443] | p-value[444] | MeanRatio | FoldChange[444] | p-value[445] | MeanRatio | FoldChange[445] | p-value[446] | MeanRatio | FoldChange[446] | p-value[447] | MeanRatio | FoldChange[447] | p-value[448] | MeanRatio | FoldChange[448] | p-value[449] | MeanRatio | FoldChange[449] | p-value[450] | MeanRatio | FoldChange[450] | p-value[451] | MeanRatio | FoldChange[451] | p-value[452] | MeanRatio | FoldChange[452] | p-value[453] | MeanRatio | FoldChange[453] | p-value[454] | MeanRatio | FoldChange[454] | p-value[455] | MeanRatio | FoldChange[455] | p-value[456] | MeanRatio | FoldChange[456] | p-value[457] | MeanRatio | FoldChange[457] | p-value[458] | MeanRatio | FoldChange[458] | p-value[459] | MeanRatio | FoldChange[459] | p-value[460] | MeanRatio | FoldChange[460] | p-value[461] | MeanRatio | FoldChange[461] | p-value[462] | MeanRatio | FoldChange[462] | p-value[463] | MeanRatio | FoldChange[463] | p-value[464] | MeanRatio | FoldChange[464] | p-value[465] | MeanRatio | FoldChange[465] | p-value[466] | MeanRatio | FoldChange[466] | p-value[467] | MeanRatio | FoldChange[467] | p-value[468] | MeanRatio | FoldChange[468] | p-value[469] | MeanRatio | FoldChange[469] | p-value[470] | MeanRatio | FoldChange[470] | p-value[471] | MeanRatio | FoldChange[471] | p-value[472] | MeanRatio | FoldChange[472] | p-value[473] | MeanRatio | FoldChange[473] | p-value[474] | MeanRatio | FoldChange[474] | p-value[475] | MeanRatio | FoldChange[475] | p-value[476] | MeanRatio | FoldChange[476] | p-value[477] | MeanRatio | FoldChange[477] | p-value[478] | MeanRatio | FoldChange[478] | p-value[479] | MeanRatio | FoldChange[479] | p-value[480] | MeanRatio | FoldChange[480] | p-value[481] | MeanRatio | FoldChange[481] | p-value[482] | MeanRatio | FoldChange[482] | p-value[483] | MeanRatio | FoldChange[483] | p-value[484] | MeanRatio | FoldChange[484] | p-value[485] | MeanRatio | FoldChange[485] | p-value[486] | MeanRatio | FoldChange[486] | p-value[487] | MeanRatio | FoldChange[487] | p-value[488] | MeanRatio | FoldChange[488] | p-value[489] | MeanRatio | FoldChange[489] | p-value[490] | MeanRatio | FoldChange[490] | p-value[491] | MeanRatio | FoldChange[491] | p-value[492] | MeanRatio | FoldChange[492] | p-value[493] | MeanRatio | FoldChange[493] | p-value[494] | MeanRatio | FoldChange[494] | p-value[495] | MeanRatio | FoldChange[495] | p-value[496] | MeanRatio | FoldChange[496] | p-value[497] | MeanRatio | FoldChange[497] | p-value[498] | MeanRatio | FoldChange[498] | p-value[499] | MeanRatio | FoldChange[499] | p-value[500] | MeanRatio | FoldChange[500] | p-value[501] | MeanRatio | FoldChange[501] | p-value[502] | MeanRatio | FoldChange[502] | p-value[503] | MeanRatio | FoldChange[503] | p-value[504] | MeanRatio | FoldChange[504] | p-value[505] | MeanRatio | FoldChange[505] | p-value[506] | MeanRatio | FoldChange[506] | p-value[507] | MeanRatio | FoldChange[507] | p-value[508] | MeanRatio | FoldChange[508] | p-value[509] | MeanRatio | FoldChange[509] | p-value[510] | MeanRatio | FoldChange[510] | p-value[511] | MeanRatio | FoldChange[511] | p-value[512] | MeanRatio | FoldChange[512] | p-value[513] | MeanRatio | FoldChange[513] | p-value[514] | MeanRatio | FoldChange[514] | p-value[515] | MeanRatio | FoldChange[515] | p-value[516] | MeanRatio | FoldChange[516] | p-value[517] | MeanRatio | FoldChange[517] | p-value[518] | MeanRatio | FoldChange[518] | p-value[519] | MeanRatio | FoldChange[519] | p-value[520] | MeanRatio | FoldChange[520] | p-value[521] | MeanRatio | FoldChange[521] | p-value[522] | MeanRatio | FoldChange[522] | p-value[523] | MeanRatio | FoldChange[523] | p-value[524] | MeanRatio | FoldChange[524] | p-value[525] | MeanRatio | FoldChange[525] | p-value[526] | MeanRatio | FoldChange[526] | p-value[527] | MeanRatio | FoldChange[527] | p-value[528] | MeanRatio | FoldChange[528] | p-value[529] | MeanRatio | FoldChange[529] | p-value[530] | MeanRatio | FoldChange[530] | p-value[531] | MeanRatio | FoldChange[531] | p-value[532] | MeanRatio | FoldChange[532] | p-value[533] | MeanRatio | FoldChange[533] | p-value[534] | MeanRatio | FoldChange[534] | p-value[535] | MeanRatio | FoldChange[535] | p-value[536] | MeanRatio | FoldChange[536] | p-value[537] | MeanRatio | FoldChange[537] | p-value[538] | MeanRatio | FoldChange[538] | p-value[539] | MeanRatio | FoldChange[539] | p-value[540] | MeanRatio | FoldChange[540] | p-value[541] | MeanRatio | FoldChange[541] | p-value[542] | MeanRatio | FoldChange[542] | p-value[543] | MeanRatio | FoldChange[543] | p-value[544] | MeanRatio | FoldChange[544] | p-value[545] | MeanRatio | FoldChange[545] | p-value[546] | MeanRatio | FoldChange[546] | p-value[547] | MeanRatio | FoldChange[547] |
|--------------|--|-----------|-----------------|--------------|-----------|-----------------|--------------|-----------|-----------------|--------------|-----------|-----------------|--------------|-----------|-----------------|--------------|-----------|-----------------|--------------|-----------|-----------------|--------------|-----------|-----------------|--------------|-----------|-----------------|--------------|-----------|-----------------|--------------|-----------|-----------------|--------------|-----------|-----------------|--------------|-----------|-----------------|--------------|-----------|-----------------|--------------|-----------|-----------------|--------------|-----------|-----------------|--------------|-----------|-----------------|--------------|-----------|-----------------|--------------|-----------|-----------------|--------------|-----------|-----------------|--------------|-----------|-----------------|--------------|-----------|-----------------|--------------|-----------|-----------------|--------------|-----------|-----------------|--------------|-----------|-----------------|--------------|-----------|-----------------|--------------|-----------|-----------------|--------------|-----------|-----------------|--------------|-----------|-----------------|--------------|-----------|-----------------|--------------|-----------|-----------------|--------------|-----------|-----------------|--------------|-----------|-----------------|--------------|-----------|-----------------|--------------|-----------|-----------------|--------------|-----------|-----------------|--------------|-----------|-----------------|--------------|-----------|-----------------|--------------|-----------|-----------------|--------------|-----------|-----------------|--------------|-----------|-----------------|--------------|-----------|-----------------|--------------|-----------|-----------------|--------------|-----------|-----------------|--------------|-----------|-----------------|--------------|-----------|-----------------|--------------|-----------|-----------------|--------------|-----------|-----------------|--------------|-----------|-----------------|--------------|-----------|-----------------|--------------|-----------|-----------------|--------------|-----------|-----------------|--------------|-----------|-----------------|--------------|-----------|-----------------|--------------|-----------|-----------------|--------------|-----------|-----------------|--------------|-----------|-----------------|--------------|-----------|-----------------|--------------|-----------|-----------------|--------------|-----------|-----------------|--------------|-----------|-----------------|--------------|-----------|-----------------|--------------|-----------|-----------------|--------------|-----------|-----------------|--------------|-----------|-----------------|--------------|-----------|-----------------|--------------|-----------|-----------------|--------------|-----------|-----------------|--------------|-----------|-----------------|--------------|-----------|-----------------|--------------|-----------|-----------------|--------------|-----------|-----------------|--------------|-----------|-----------------|--------------|-----------|-----------------|--------------|-----------|-----------------|--------------|-----------|-----------------|--------------|-----------|-----------------|--------------|-----------|-----------------|--------------|-----------|-----------------|--------------|-----------|-----------------|--------------|-----------|-----------------|--------------|-----------|-----------------|--------------|-----------|-----------------|--------------|-----------|-----------------|--------------|-----------|-----------------|--------------|-----------|-----------------|--------------|-----------|-----------------|--------------|-----------|-----------------|--------------|-----------|-----------------|--------------|-----------|-----------------|--------------|-----------|-----------------|--------------|-----------|-----------------|--------------|-----------|-----------------|--------------|-----------|-----------------|--------------|-----------|-----------------|--------------|-----------|-----------------|--------------|-----------|-----------------|--------------|-----------|-----------------|--------------|-----------|-----------------|--------------|-----------|-----------------|--------------|-----------|-----------------|--------------|-----------|-----------------|--------------|-----------|-----------------|--------------|-----------|-----------------|--------------|-----------|-----------------|--------------|-----------|-----------------|--------------|-----------|-----------------|--------------|-----------|-----------------|--------------|-----------|-----------------|--------------|-----------|-----------------|--------------|-----------|-----------------|--------------|-----------|-----------------|--------------|-----------|-----------------|--------------|-----------|-----------------|--------------|-----------|-----------------|--------------|-----------|-----------------|--------------|-----------|-----------------|--------------|-----------|-----------------|--------------|-----------|-----------------|--------------|-----------|-----------------|--------------|-----------|-----------------|--------------|-----------|-----------------|--------------|-----------|-----------------|--------------|-----------|-----------------|--------------|-----------|-----------------|--------------|-----------|-----------------|--------------|-----------|-----------------|--------------|-----------|-----------------|--------------|-----------|-----------------|--------------|-----------|-----------------|--------------|-----------|-----------------|--------------|-----------|-----------------|--------------|-----------|-----------------|--------------|-----------|-----------------|--------------|-----------|-----------------|--------------|-----------|-----------------|--------------|-----------|-----------------|--------------|-----------|-----------------|--------------|-----------|-----------------|--------------|-----------|-----------------|--------------|-----------|-----------------|--------------|-----------|-----------------|--------------|-----------|-----------------|--------------|-----------|-----------------|--------------|-----------|-----------------|--------------|-----------|-----------------|--------------|-----------|-----------------|--------------|-----------|-----------------|--------------|-----------|-----------------|--------------|-----------|-----------------|--------------|-----------|-----------------|--------------|-----------|-----------------|--------------|-----------|-----------------|--------------|-----------|-----------------|--------------|-----------|-----------------|--------------|-----------|-----------------|--------------|-----------|-----------------|--------------|-----------|-----------------|--------------|-----------|-----------------|--------------|-----------|-----------------|--------------|-----------|-----------------|--------------|-----------|-----------------|--------------|-----------|-----------------|--------------|-----------|-----------------|--------------|-----------|-----------------|--------------|-----------|-----------------|--------------|-----------|-----------------|--------------|-----------|-----------------|--------------|-----------|-----------------|--------------|-----------|-----------------|--------------|-----------|-----------------|--------------|-----------|-----------------|--------------|-----------|-----------------|--------------|-----------|-----------------|--------------|-----------|-----------------|--------------|-----------|-----------------|--------------|-----------|-----------------|--------------|-----------|-----------------|--------------|-----------|-----------------|--------------|-----------|-----------------|--------------|-----------|-----------------|--------------|-----------|-----------------|--------------|-----------|-----------------|--------------|-----------|-----------------|--------------|-----------|-----------------|--------------|-----------|-----------------|--------------|-----------|-----------------|--------------|-----------|-----------------|--------------|-----------|-----------------|--------------|-----------|-----------------|--------------|-----------|-----------------|--------------|-----------|-----------------|--------------|-----------|-----------------|--------------|-----------|-----------------|--------------|-----------|-----------------|--------------|-----------|-----------------|--------------|-----------|-----------------|--------------|-----------|-----------------|--------------|-----------|-----------------|--------------|-----------|-----------------|--------------|-----------|-----------------|--------------|-----------|-----------------|--------------|-----------|-----------------|--------------|-----------|-----------------|--------------|-----------|-----------------|--------------|-----------|-----------------|--------------|-----------|-----------------|--------------|-----------|-----------------|--------------|-----------|-----------------|--------------|-----------|-----------------|--------------|-----------|-----------------|--------------|-----------|-----------------|--------------|-----------|-----------------|--------------|-----------|-----------------|--------------|-----------|-----------------|--------------|-----------|-----------------|--------------|-----------|-----------------|--------------|-----------|-----------------|--------------|-----------|-----------------|--------------|-----------|-----------------|--------------|-----------|-----------------|--------------|-----------|-----------------|--------------|-----------|-----------------|--------------|-----------|-----------------|--------------|-----------|-----------------|--------------|-----------|-----------------|--------------|-----------|-----------------|--------------|-----------|-----------------|--------------|-----------|-----------------|--------------|-----------|-----------------|--------------|-----------|-----------------|--------------|-----------|-----------------|--------------|-----------|-----------------|--------------|-----------|-----------------|--------------|-----------|-----------------|--------------|-----------|-----------------|--------------|-----------|-----------------|--------------|-----------|-----------------|--------------|-----------|-----------------|--------------|-----------|-----------------|--------------|-----------|-----------------|--------------|-----------|-----------------|--------------|-----------|-----------------|--------------|-----------|-----------------|--------------|-----------|-----------------|--------------|-----------|-----------------|--------------|-----------|-----------------|--------------|-----------|-----------------|--------------|-----------|-----------------|--------------|-----------|-----------------|--------------|-----------|-----------------|--------------|-----------|-----------------|--------------|-----------|-----------------|--------------|-----------|-----------------|--------------|-----------|-----------------|--------------|-----------|-----------------|--------------|-----------|-----------------|--------------|-----------|-----------------|--------------|-----------|-----------------|--------------|-----------|-----------------|--------------|-----------|-----------------|--------------|-----------|-----------------|--------------|-----------|-----------------|--------------|-----------|-----------------|--------------|-----------|-----------------|--------------|-----------|-----------------|--------------|-----------|-----------------|--------------|-----------|-----------------|--------------|-----------|-----------------|--------------|-----------|-----------------|--------------|-----------|-----------------|--------------|-----------|-----------------|--------------|-----------|-----------------|--------------|-----------|-----------------|--------------|-----------|-----------------|--------------|-----------|-----------------|--------------|-----------|-----------------|--------------|-----------|-----------------|--------------|-----------|-----------------|--------------|-----------|-----------------|--------------|-----------|-----------------|--------------|-----------|-----------------|--------------|-----------|-----------------|--------------|-----------|-----------------|--------------|-----------|-----------------|--------------|-----------|-----------------|--------------|-----------|-----------------|--------------|-----------|-----------------|--------------|-----------|-----------------|--------------|-----------|-----------------|--------------|-----------|-----------------|--------------|-----------|-----------------|--------------|-----------|-----------------|--------------|-----------|-----------------|--------------|-----------|-----------------|--------------|-----------|-----------------|--------------|-----------|-----------------|--------------|-----------|-----------------|--------------|-----------|-----------------|--------------|-----------|-----------------|--------------|-----------|-----------------|--------------|-----------|-----------------|--------------|-----------|-----------------|--------------|-----------|-----------------|--------------|-----------|-----------------|--------------|-----------|-----------------|--------------|-----------|-----------------|--------------|-----------|-----------------|--------------|-----------|-----------------|--------------|-----------|-----------------|--------------|-----------|-----------------|--------------|-----------|-----------------|--------------|-----------|-----------------|--------------|-----------|-----------------|--------------|-----------|-----------------|--------------|-----------|-----------------|--------------|-----------|-----------------|--------------|-----------|-----------------|--------------|-----------|-----------------|--------------|-----------|-----------------|--------------|-----------|-----------------|--------------|-----------|-----------------|--------------|-----------|-----------------|--------------|-----------|-----------------|--------------|-----------|-----------------|--------------|-----------|-----------------|--------------|-----------|-----------------|--------------|-----------|-----------------|--------------|-----------|-----------------|--------------|-----------|-----------------|--------------|-----------|-----------------|--------------|-----------|-----------------|--------------|-----------|-----------------|--------------|-----------|-----------------|--------------|-----------|-----------------|--------------|-----------|-----------------|--------------|-----------|-----------------|--------------|-----------|-----------------|--------------|-----------|-----------------|--------------|-----------|-----------------|--------------|-----------|-----------------|--------------|-----------|-----------------|--------------|-----------|-----------------|--------------|-----------|-----------------|--------------|-----------|-----------------|--------------|-----------|-----------------|--------------|-----------|-----------------|--------------|-----------|-----------------|--------------|-----------|-----------------|--------------|-----------|-----------------|--------------|-----------|-----------------|--------------|-----------|-----------------|--------------|-----------|-----------------|--------------|-----------|-----------------|--------------|-----------|-----------------|--------------|-----------|-----------------|--------------|-----------|-----------------|--------------|-----------|-----------------|--------------|-----------|-----------------|--------------|-----------|-----------------|--------------|-----------|-----------------|--------------|-----------|-----------------|--------------|-----------|-----------------|--------------|-----------|-----------------|--------------|-----------|-----------------|--------------|-----------|-----------------|--------------|-----------|-----------------|--------------|-----------|-----------------|--------------|-----------|-----------------|--------------|-----------|-----------------|--------------|-----------|-----------------|--------------|-----------|-----------------|--------------|-----------|-----------------|--------------|-----------|-----------------|--------------|-----------|-----------------|--------------|-----------|-----------------|--------------|-----------|-----------------|--------------|-----------|-----------------|--------------|-----------|-----------------|--------------|-----------|-----------------|--------------|-----------|-----------------|--------------|-----------|-----------------|--------------|-----------|-----------------|--------------|-----------|-----------------|--------------|-----------|-----------------|--------------|-----------|-----------------|--------------|-----------|-----------------|--------------|-----------|-----------------|--------------|-----------|-----------------|--------------|-----------|-----------------|--------------|-----------|-----------------|--------------|-----------|-----------------|--------------|-----------|-----------------|--------------|-----------|-----------------|--------------|-----------|-----------------|--------------|-----------|-----------------|--------------|-----------|-----------------|--------------|-----------|-----------------|--------------|-----------|-----------------|--------------|-----------|-----------------|--------------|-----------|-----------------|--------------|-----------|-----------------|--------------|-----------|-----------------|--------------|-----------|-----------------|--------------|-----------|-----------------|--------------|-----------|-----------------|--------------|-----------|-----------------|--------------|-----------|-----------------|--------------|-----------|-----------------|--------------|-----------|-----------------|--------------|-----------|-----------------|--------------|-----------|-----------------|--------------|-----------|-----------------|--------------|-----------|-----------------|--------------|-----------|-----------------|--------------|-----------|-----------------|--------------|-----------|-----------------|--------------|-----------|-----------------|--------------|-----------|-----------------|--------------|-----------|-----------------|--------------|-----------|-----------------|--------------|-----------|-----------------|--------------|-----------|-----------------|--------------|-----------|-----------------|--------------|-----------|-----------------|--------------|-----------|-----------------|--------------|-----------|-----------------|--------------|-----------|-----------------|--------------|-----------|-----------------|--------------|-----------|-----------------|--------------|-----------|-----------------|--------------|-----------|-----------------|--------------|-----------|-----------------|--------------|-----------|-----------------|--------------|-----------|-----------------|--------------|-----------|-----------------|--------------|-----------|-----------------|--------------|-----------|-----------------|--------------|-----------|-----------------|--------------|-----------|-----------------|--------------|-----------|-----------------|--------------|-----------|-----------------|
|--------------|--|-----------|-----------------|--------------|-----------|-----------------|--------------|-----------|-----------------|--------------|-----------|-----------------|--------------|-----------|-----------------|--------------|-----------|-----------------|--------------|-----------|-----------------|--------------|-----------|-----------------|--------------|-----------|-----------------|--------------|-----------|-----------------|--------------|-----------|-----------------|--------------|-----------|-----------------|--------------|-----------|-----------------|--------------|-----------|-----------------|--------------|-----------|-----------------|--------------|-----------|-----------------|--------------|-----------|-----------------|--------------|-----------|-----------------|--------------|-----------|-----------------|--------------|-----------|-----------------|--------------|-----------|-----------------|--------------|-----------|-----------------|--------------|-----------|-----------------|--------------|-----------|-----------------|--------------|-----------|-----------------|--------------|-----------|-----------------|--------------|-----------|-----------------|--------------|-----------|-----------------|--------------|-----------|-----------------|--------------|-----------|-----------------|--------------|-----------|-----------------|--------------|-----------|-----------------|--------------|-----------|-----------------|--------------|-----------|-----------------|--------------|-----------|-----------------|--------------|-----------|-----------------|--------------|-----------|-----------------|--------------|-----------|-----------------|--------------|-----------|-----------------|--------------|-----------|-----------------|--------------|-----------|-----------------|--------------|-----------|-----------------|--------------|-----------|-----------------|--------------|-----------|-----------------|--------------|-----------|-----------------|--------------|-----------|-----------------|--------------|-----------|-----------------|--------------|-----------|-----------------|--------------|-----------|-----------------|--------------|-----------|-----------------|--------------|-----------|-----------------|--------------|-----------|-----------------|--------------|-----------|-----------------|--------------|-----------|-----------------|--------------|-----------|-----------------|--------------|-----------|-----------------|--------------|-----------|-----------------|--------------|-----------|-----------------|--------------|-----------|-----------------|--------------|-----------|-----------------|--------------|-----------|-----------------|--------------|-----------|-----------------|--------------|-----------|-----------------|--------------|-----------|-----------------|--------------|-----------|-----------------|--------------|-----------|-----------------|--------------|-----------|-----------------|--------------|-----------|-----------------|--------------|-----------|-----------------|--------------|-----------|-----------------|--------------|-----------|-----------------|--------------|-----------|-----------------|--------------|-----------|-----------------|--------------|-----------|-----------------|--------------|-----------|-----------------|--------------|-----------|-----------------|--------------|-----------|-----------------|--------------|-----------|-----------------|--------------|-----------|-----------------|--------------|-----------|-----------------|--------------|-----------|-----------------|--------------|-----------|-----------------|--------------|-----------|-----------------|--------------|-----------|-----------------|--------------|-----------|-----------------|--------------|-----------|-----------------|--------------|-----------|-----------------|--------------|-----------|-----------------|--------------|-----------|-----------------|--------------|-----------|-----------------|--------------|-----------|-----------------|--------------|-----------|-----------------|--------------|-----------|-----------------|--------------|-----------|-----------------|--------------|-----------|-----------------|--------------|-----------|-----------------|--------------|-----------|-----------------|--------------|-----------|-----------------|--------------|-----------|-----------------|--------------|-----------|-----------------|--------------|-----------|-----------------|--------------|-----------|-----------------|--------------|-----------|-----------------|--------------|-----------|-----------------|--------------|-----------|-----------------|--------------|-----------|-----------------|--------------|-----------|-----------------|--------------|-----------|-----------------|--------------|-----------|-----------------|--------------|-----------|-----------------|--------------|-----------|-----------------|--------------|-----------|-----------------|--------------|-----------|-----------------|--------------|-----------|-----------------|--------------|-----------|-----------------|--------------|-----------|-----------------|--------------|-----------|-----------------|--------------|-----------|-----------------|--------------|-----------|-----------------|--------------|-----------|-----------------|--------------|-----------|-----------------|--------------|-----------|-----------------|--------------|-----------|-----------------|--------------|-----------|-----------------|--------------|-----------|-----------------|--------------|-----------|-----------------|--------------|-----------|-----------------|--------------|-----------|-----------------|--------------|-----------|-----------------|--------------|-----------|-----------------|--------------|-----------|-----------------|--------------|-----------|-----------------|--------------|-----------|-----------------|--------------|-----------|-----------------|--------------|-----------|-----------------|--------------|-----------|-----------------|--------------|-----------|-----------------|--------------|-----------|-----------------|--------------|-----------|-----------------|--------------|-----------|-----------------|--------------|-----------|-----------------|--------------|-----------|-----------------|--------------|-----------|-----------------|--------------|-----------|-----------------|--------------|-----------|-----------------|--------------|-----------|-----------------|--------------|-----------|-----------------|--------------|-----------|-----------------|--------------|-----------|-----------------|--------------|-----------|-----------------|--------------|-----------|-----------------|--------------|-----------|-----------------|--------------|-----------|-----------------|--------------|-----------|-----------------|--------------|-----------|-----------------|--------------|-----------|-----------------|--------------|-----------|-----------------|--------------|-----------|-----------------|--------------|-----------|-----------------|--------------|-----------|-----------------|--------------|-----------|-----------------|--------------|-----------|-----------------|--------------|-----------|-----------------|--------------|-----------|-----------------|--------------|-----------|-----------------|--------------|-----------|-----------------|--------------|-----------|-----------------|--------------|-----------|-----------------|--------------|-----------|-----------------|--------------|-----------|-----------------|--------------|-----------|-----------------|--------------|-----------|-----------------|--------------|-----------|-----------------|--------------|-----------|-----------------|--------------|-----------|-----------------|--------------|-----------|-----------------|--------------|-----------|-----------------|--------------|-----------|-----------------|--------------|-----------|-----------------|--------------|-----------|-----------------|--------------|-----------|-----------------|--------------|-----------|-----------------|--------------|-----------|-----------------|--------------|-----------|-----------------|--------------|-----------|-----------------|--------------|-----------|-----------------|--------------|-----------|-----------------|--------------|-----------|-----------------|--------------|-----------|-----------------|--------------|-----------|-----------------|--------------|-----------|-----------------|--------------|-----------|-----------------|--------------|-----------|-----------------|--------------|-----------|-----------------|--------------|-----------|-----------------|--------------|-----------|-----------------|--------------|-----------|-----------------|--------------|-----------|-----------------|--------------|-----------|-----------------|--------------|-----------|-----------------|--------------|-----------|-----------------|--------------|-----------|-----------------|--------------|-----------|-----------------|--------------|-----------|-----------------|--------------|-----------|-----------------|--------------|-----------|-----------------|--------------|-----------|-----------------|--------------|-----------|-----------------|--------------|-----------|-----------------|--------------|-----------|-----------------|--------------|-----------|-----------------|--------------|-----------|-----------------|--------------|-----------|-----------------|--------------|-----------|-----------------|--------------|-----------|-----------------|--------------|-----------|-----------------|--------------|-----------|-----------------|--------------|-----------|-----------------|--------------|-----------|-----------------|--------------|-----------|-----------------|--------------|-----------|-----------------|--------------|-----------|-----------------|--------------|-----------|-----------------|--------------|-----------|-----------------|--------------|-----------|-----------------|--------------|-----------|-----------------|--------------|-----------|-----------------|--------------|-----------|-----------------|--------------|-----------|-----------------|--------------|-----------|-----------------|--------------|-----------|-----------------|--------------|-----------|-----------------|--------------|-----------|-----------------|--------------|-----------|-----------------|--------------|-----------|-----------------|--------------|-----------|-----------------|--------------|-----------|-----------------|--------------|-----------|-----------------|--------------|-----------|-----------------|--------------|-----------|-----------------|--------------|-----------|-----------------|--------------|-----------|-----------------|--------------|-----------|-----------------|--------------|-----------|-----------------|--------------|-----------|-----------------|--------------|-----------|-----------------|--------------|-----------|-----------------|--------------|-----------|-----------------|--------------|-----------|-----------------|--------------|-----------|-----------------|--------------|-----------|-----------------|--------------|-----------|-----------------|--------------|-----------|-----------------|--------------|-----------|-----------------|--------------|-----------|-----------------|--------------|-----------|-----------------|--------------|-----------|-----------------|--------------|-----------|-----------------|--------------|-----------|-----------------|--------------|-----------|-----------------|--------------|-----------|-----------------|--------------|-----------|-----------------|--------------|-----------|-----------------|--------------|-----------|-----------------|--------------|-----------|-----------------|--------------|-----------|-----------------|--------------|-----------|-----------------|--------------|-----------|-----------------|--------------|-----------|-----------------|--------------|-----------|-----------------|--------------|-----------|-----------------|--------------|-----------|-----------------|--------------|-----------|-----------------|--------------|-----------|-----------------|--------------|-----------|-----------------|--------------|-----------|-----------------|--------------|-----------|-----------------|--------------|-----------|-----------------|--------------|-----------|-----------------|--------------|-----------|-----------------|--------------|-----------|-----------------|--------------|-----------|-----------------|--------------|-----------|-----------------|--------------|-----------|-----------------|--------------|-----------|-----------------|--------------|-----------|-----------------|--------------|-----------|-----------------|--------------|-----------|-----------------|--------------|-----------|-----------------|--------------|-----------|-----------------|--------------|-----------|-----------------|--------------|-----------|-----------------|--------------|-----------|-----------------|--------------|-----------|-----------------|--------------|-----------|-----------------|--------------|-----------|-----------------|--------------|-----------|-----------------|--------------|-----------|-----------------|--------------|-----------|-----------------|--------------|-----------|-----------------|--------------|-----------|-----------------|--------------|-----------|-----------------|--------------|-----------|-----------------|--------------|-----------|-----------------|--------------|-----------|-----------------|--------------|-----------|-----------------|--------------|-----------|-----------------|--------------|-----------|-----------------|--------------|-----------|-----------------|--------------|-----------|-----------------|--------------|-----------|-----------------|--------------|-----------|-----------------|--------------|-----------|-----------------|--------------|-----------|-----------------|--------------|-----------|-----------------|--------------|-----------|-----------------|--------------|-----------|-----------------|--------------|-----------|-----------------|--------------|-----------|-----------------|--------------|-----------|-----------------|--------------|-----------|-----------------|--------------|-----------|-----------------|--------------|-----------|-----------------|--------------|-----------|-----------------|--------------|-----------|-----------------|--------------|-----------|-----------------|--------------|-----------|-----------------|--------------|-----------|-----------------|--------------|-----------|-----------------|--------------|-----------|-----------------|--------------|-----------|-----------------|--------------|-----------|-----------------|--------------|-----------|-----------------|--------------|-----------|-----------------|--------------|-----------|-----------------|--------------|-----------|-----------------|--------------|-----------|-----------------|--------------|-----------|-----------------|--------------|-----------|-----------------|--------------|-----------|-----------------|--------------|-----------|-----------------|--------------|-----------|-----------------|--------------|-----------|-----------------|--------------|-----------|-----------------|--------------|-----------|-----------------|--------------|-----------|-----------------|--------------|-----------|-----------------|--------------|-----------|-----------------|--------------|-----------|-----------------|--------------|-----------|-----------------|--------------|-----------|-----------------|--------------|-----------|-----------------|--------------|-----------|-----------------|--------------|-----------|-----------------|--------------|-----------|-----------------|--------------|-----------|-----------------|--------------|-----------|-----------------|--------------|-----------|-----------------|--------------|-----------|-----------------|--------------|-----------|-----------------|--------------|-----------|-----------------|--------------|-----------|-----------------|--------------|-----------|-----------------|--------------|-----------|-----------------|--------------|-----------|-----------------|--------------|-----------|-----------------|--------------|-----------|-----------------|--------------|-----------|-----------------|--------------|-----------|-----------------|--------------|-----------|-----------------|--------------|-----------|-----------------|--------------|-----------|-----------------|--------------|-----------|-----------------|--------------|-----------|-----------------|--------------|-----------|-----------------|--------------|-----------|-----------------|--------------|-----------|-----------------|--------------|-----------|-----------------|--------------|-----------|-----------------|--------------|-----------|-----------------|--------------|-----------|-----------------|--------------|-----------|-----------------|--------------|-----------|-----------------|--------------|-----------|-----------------|--------------|-----------|-----------------|--------------|-----------|-----------------|--------------|-----------|-----------------|--------------|-----------|-----------------|--------------|-----------|-----------------|--------------|-----------|-----------------|--------------|-----------|-----------------|--------------|-----------|-----------------|--------------|-----------|-----------------|--------------|-----------|-----------------|--------------|-----------|-----------------|--------------|-----------|-----------------|--------------|-----------|-----------------|--------------|-----------|-----------------|--------------|-----------|-----------------|--------------|-----------|-----------------|--------------|-----------|-----------------|--------------|-----------|-----------------|--------------|-----------|-----------------|--------------|-----------|-----------------|--------------|-----------|-----------------|--------------|-----------|-----------------|--------------|-----------|-----------------|--------------|-----------|-----------------|--------------|-----------|-----------------|--------------|-----------|-----------------|--------------|-----------|-----------------|--------------|-----------|-----------------|--------------|-----------|-----------------|--------------|-----------|-----------------|--------------|-----------|-----------------|--------------|-----------|-----------------|--------------|-----------|-----------------|--------------|-----------|-----------------|--------------|-----------|-----------------|--------------|-----------|-----------------|--------------|-----------|-----------------|--------------|-----------|-----------------|--------------|-----------|-----------------|--------------|-----------|-----------------|--------------|-----------|-----------------|--------------|-----------|-----------------|--------------|-----------|-----------------|--------------|-----------|-----------------|--------------|-----------|-----------------|--------------|-----------|-----------------|--------------|-----------|-----------------|--------------|-----------|-----------------|--------------|-----------|-----------------|--------------|-----------|-----------------|--------------|-----------|-----------------|--------------|-----------|-----------------|--------------|-----------|-----------------|--------------|-----------|-----------------|--------------|-----------|-----------------|--------------|-----------|-----------------|--------------|-----------|-----------------|--------------|-----------|-----------------|



**Title:** Comparative Multidimensional Molecular Analyses of Pediatric Diffuse Intrinsic Pontine Glioma Reveals Distinct Molecular Subtypes  
**Journal:** Acta Neuropathologica

Javad Nazarian, Children's National Medical Center

Phone: 202-476-6022 Fax: 202-476-6014  
E-mail: [D.Morgan@CMAA.org](mailto:D.Morgan@CMAA.org)





File: ESM\_10 (Online Resource 10)

Title: Comparative Multidimensional Molecular Analyses of Pediatric Diffuse Intrinsic Glioma Reveals Distinct Molecular Subtypes

Journal: Acta Neuropathologica

Authors: Amanda M. Stransik, Madhuri Kumbhakar, Kendall Snyder, Sidicki Yavuz, Joe Devenney, Brennan Harmon, Jordan Hall, Eric H. Rubie, Ping An, Melanie Weingart, Brian Ross, Sarah Magee, Roger J. Packer, Javad Nazarian

Corresponding Author:

Javad Nazarian, Children's National Medical Center, Center for Genetic Medicine  
111 Michigan Ave., NW, Washington DC, 20010  
Phone: 202-476-6022 Fax: 202-476-6014  
Email: Javad.Nazarian@CNMC.org

| Gene ID |  | FolChang106 |  | FolChang107 |  | FolChang108 |  | FolChang109 |  | FolChang110 |  | FolChang111 |  | FolChang112 |  | FolChang113 |  | FolChang114 |  | FolChang115 |  | FolChang116 |  | FolChang117 |  | FolChang118 |  | FolChang119 |  | FolChang120 |  | FolChang121 |  | FolChang122 |  | FolChang123 |  | FolChang124 |  | FolChang125 |  | FolChang126 |  | FolChang127 |  | FolChang128 |  | FolChang129 |  | FolChang130 |  | FolChang131 |  | FolChang132 |  | FolChang133 |  | FolChang134 |  | FolChang135 |  | FolChang136 |  | FolChang137 |  | FolChang138 |  | FolChang139 |  | FolChang140 |  | FolChang141 |  | FolChang142 |  | FolChang143 |  | FolChang144 |  | FolChang145 |  | FolChang146 |  | FolChang147 |  | FolChang148 |  | FolChang149 |  | FolChang150 |  | FolChang151 |  | FolChang152 |  | FolChang153 |  | FolChang154 |  | FolChang155 |  | FolChang156 |  | FolChang157 |  | FolChang158 |  | FolChang159 |  | FolChang160 |  | FolChang161 |  | FolChang162 |  | FolChang163 |  | FolChang164 |  | FolChang165 |  | FolChang166 |  | FolChang167 |  | FolChang168 |  | FolChang169 |  | FolChang170 |  | FolChang171 |  | FolChang172 |  | FolChang173 |  | FolChang174 |  | FolChang175 |  | FolChang176 |  | FolChang177 |  | FolChang178 |  | FolChang179 |  | FolChang180 |  | FolChang181 |  | FolChang182 |  | FolChang183 |  | FolChang184 |  | FolChang185 |  | FolChang186 |  | FolChang187 |  | FolChang188 |  | FolChang189 |  | FolChang190 |  | FolChang191 |  | FolChang192 |  | FolChang193 |  | FolChang194 |  | FolChang195 |  | FolChang196 |  | FolChang197 |  | FolChang198 |  | FolChang199 |  | FolChang200 |  | FolChang201 |  | FolChang202 |  | FolChang203 |  | FolChang204 |  | FolChang205 |  | FolChang206 |  | FolChang207 |  | FolChang208 |  | FolChang209 |  | FolChang210 |  | FolChang211 |  | FolChang212 |  | FolChang213 |  | FolChang214 |  | FolChang215 |  | FolChang216 |  | FolChang217 |  | FolChang218 |  | FolChang219 |  | FolChang220 |  | FolChang221 |  | FolChang222 |  | FolChang223 |  | FolChang224 |  | FolChang225 |  | FolChang226 |  | FolChang227 |  | FolChang228 |  | FolChang229 |  | FolChang230 |  | FolChang231 |  | FolChang232 |  | FolChang233 |  | FolChang234 |  | FolChang235 |  | FolChang236 |  | FolChang237 |  | FolChang238 |  | FolChang239 |  | FolChang240 |  | FolChang241 |  | FolChang242 |  | FolChang243 |  | FolChang244 |  | FolChang245 |  | FolChang246 |  | FolChang247 |  | FolChang248 |  | FolChang249 |  | FolChang250 |  | FolChang251 |  | FolChang252 |  | FolChang253 |  | FolChang254 |  | FolChang255 |  | FolChang256 |  | FolChang257 |  | FolChang258 |  | FolChang259 |  | FolChang260 |  | FolChang261 |  | FolChang262 |  | FolChang263 |  | FolChang264 |  | FolChang265 |  | FolChang266 |  | FolChang267 |  | FolChang268 |  | FolChang269 |  | FolChang270 |  | FolChang271 |  | FolChang272 |  | FolChang273 |  | FolChang274 |  | FolChang275 |  | FolChang276 |  | FolChang277 |  | FolChang278 |  | FolChang279 |  | FolChang280 |  | FolChang281 |  | FolChang282 |  | FolChang283 |  | FolChang284 |  | FolChang285 |  | FolChang286 |  | FolChang287 |  | FolChang288 |  | FolChang289 |  | FolChang290 |  | FolChang291 |  | FolChang292 |  | FolChang293 |  | FolChang294 |  | FolChang295 |  | FolChang296 |  | FolChang297 |  | FolChang298 |  | FolChang299 |  | FolChang300 |  | FolChang301 |  | FolChang302 |  | FolChang303 |  | FolChang304 |  | FolChang305 |  | FolChang306 |  | FolChang307 |  | FolChang308 |  | FolChang309 |  | FolChang310 |  | FolChang311 |  | FolChang312 |  | FolChang313 |  | FolChang314 |  | FolChang315 |  | FolChang316 |  | FolChang317 |  | FolChang318 |  | FolChang319 |  | FolChang320 |  | FolChang321 |  | FolChang322 |  | FolChang323 |  | FolChang324 |  | FolChang325 |  | FolChang326 |  | FolChang327 |  | FolChang328 |  | FolChang329 |  | FolChang330 |  | FolChang331 |  | FolChang332 |  | FolChang333 |  | FolChang334 |  | FolChang335 |  | FolChang336 |  | FolChang337 |  | FolChang338 |  | FolChang339 |  | FolChang340 |  | FolChang341 |  | FolChang342 |  | FolChang343 |  | FolChang344 |  | FolChang345 |  | FolChang346 |  | FolChang347 |  | FolChang348 |  | FolChang349 |  | FolChang350 |  | FolChang351 |  | FolChang352 |  | FolChang353 |  | FolChang354 |  | FolChang355 |  | FolChang356 |  | FolChang357 |  | FolChang358 |  | FolChang359 |  | FolChang360 |  | FolChang361 |  | FolChang362 |  | FolChang363 |  | FolChang364 |  | FolChang365 |  | FolChang366 |  | FolChang367 |  | FolChang368 |  | FolChang369 |  | FolChang370 |  | FolChang371 |  | FolChang372 |  | FolChang373 |  | FolChang374 |  | FolChang375 |  | FolChang376 |  | FolChang377 |  | FolChang378 |  | FolChang379 |  | FolChang380 |  | FolChang381 |  | FolChang382 |  | FolChang383 |  | FolChang384 |  | FolChang385 |  | FolChang386 |  | FolChang387 |  | FolChang388 |  | FolChang389 |  | FolChang390 |  | FolChang391 |  | FolChang392 |  | FolChang393 |  | FolChang394 |  | FolChang395 |  | FolChang396 |  | FolChang397 |  | FolChang398 |  | FolChang399 |  | FolChang400 |  | FolChang401 |  | FolChang402 |  | FolChang403 |  | FolChang404 |  | FolChang405 |  | FolChang406 |  | FolChang407 |  | FolChang408 |  | FolChang409 |  | FolChang410 |  | FolChang411 |  | FolChang412 |  | FolChang413 |  | FolChang414 |  | FolChang415 |  | FolChang416 |  | FolChang417 |  | FolChang418 |  | FolChang419 |  | FolChang420 |  | FolChang421 |  | FolChang422 |  | FolChang423 |  | FolChang424 |  | FolChang425 |  | FolChang426 |  | FolChang427 |  | FolChang428 |  | FolChang429 |  | FolChang430 |  | FolChang431 |  | FolChang432 |  | FolChang433 |  | FolChang434 |  | FolChang435 |  | FolChang436 |  | FolChang437 |  | FolChang438 |  | FolChang439 |  | FolChang440 |  | FolChang441 |  | FolChang442 |  | FolChang443 |  | FolChang444 |  | FolChang445 |  | FolChang446 |  | FolChang447 |  | FolChang448 |  | FolChang449 |  | FolChang450 |  | FolChang451 |  | FolChang452 |  | FolChang453 |  | FolChang454 |  | FolChang455 |  | FolChang456 |  | FolChang457 |  | FolChang458 |  | FolChang459 |  | FolChang460 |  | FolChang461 |  | FolChang462 |  | FolChang463 |  | FolChang464 |  | FolChang465 |  | FolChang466 |  | FolChang467 |  | FolChang468 |  | FolChang469 |  | FolChang470 |  | FolChang471 |  | FolChang472 |  | FolChang473 |  | FolChang474 |  | FolChang475 |  | FolChang476 |  | FolChang477 |  | FolChang478 |  | FolChang479 |  | FolChang480 |  | FolChang481 |  | FolChang482 |  | FolChang483 |  | FolChang484 |  | FolChang485 |  | FolChang486 |  | FolChang487 |  | FolChang488 |  | FolChang489 |  | FolChang490 |  | FolChang491 |  | FolChang492 |  | FolChang493 |  | FolChang494 |  | FolChang495 |  | FolChang496 |  | FolChang497 |  | FolChang498 |  | FolChang499 |  | FolChang500 |  | FolChang501 |  | FolChang502 |  | FolChang503 |  | FolChang504 |  | FolChang505 |  | FolChang506 |  | FolChang507 |  | FolChang508 |  | FolChang509 |  | FolChang510 |  | FolChang511 |  | FolChang512 |  | FolChang513 |  | FolChang514 |  | FolChang515 |  | FolChang516 |  | FolChang517 |  | FolChang518 |  | FolChang519 |  | FolChang520 |  | FolChang521 |  | FolChang522 |  | FolChang523 |  | FolChang524 |  | FolChang525 |  | FolChang526 |  | FolChang527 |  | FolChang528 |  | FolChang529 |  | FolChang530 |  | FolChang531 |  | FolChang532 |  | FolChang533 |  | FolChang534 |  | FolChang535 |  | FolChang536 |  | FolChang537 |  | FolChang538 |  | FolChang539 |  | FolChang540 |  | FolChang541 |  | FolChang542 |  | FolChang543 |  | FolChang544 |  | FolChang545 |  | FolChang546 |  | FolChang547 |  | FolChang548 |  | FolChang549 |  | FolChang550 |  | FolChang551 |  | FolChang552 |  | FolChang553 |  | FolChang554 |  | FolChang555 |  | FolChang556 |  | FolChang557 |  | FolChang558 |  | FolChang559 |  | FolChang560 |  | FolChang561 |  | FolChang562 |  | FolChang563 |  | FolChang564 |  | FolChang565 |  | FolChang566 |  | FolChang567 |  | FolChang568 |  | FolChang569 |  | FolChang570 |  | FolChang571 |  | FolChang572 |  | FolChang573 |  | FolChang574 |  | FolChang575 |  | FolChang576 |  | FolChang577 |  | FolChang578 |  | FolChang579 |  | FolChang580 |  | FolChang581 |  | FolChang582 |  | FolChang583 |  | FolChang584 |  | FolChang585 |  | FolChang586 |  | FolChang587 |  | FolChang588 |  | FolChang589 |  | FolChang590 |  | FolChang591 |  | FolChang592 |  | FolChang593 |  | FolChang594 |  | FolChang595 |  | FolChang596 |  | FolChang597 |  | FolChang598 |  | FolChang599 |  | FolChang600 |  | FolChang601 |  | FolChang602 |  | FolChang603 |  | FolChang604 |  | FolChang605 |  | FolChang606 |  | FolChang607 |  | FolChang608 |  | FolChang609 |  | FolChang610 |  | FolChang611 |  | FolChang612 |  | FolChang613 |  | FolChang614 |  | FolChang615 |  | FolChang616 |  | FolChang617 |  | FolChang618 |  | FolChang619 |  | FolChang620 |  | FolChang621 |  | FolChang622 |  | FolChang623 |  | FolChang624 |  | FolChang625 |  | FolChang626 |  | FolChang627 |  | FolChang628 |  | FolChang629 |  | FolChang630 |  | FolChang631 |  | FolChang632 |  | FolChang633 |  | FolChang634 |  | FolChang635 |  | FolChang636 |  | FolChang637 |  | FolChang638 |  | FolChang639 |  | FolChang640 |  | FolChang641 |  | FolChang642 |  | FolChang643 |  | FolChang644 |  | FolChang645 |  | FolChang646 |  | FolChang647 |  | FolChang648 |  | FolChang649 |  | FolChang650 |  | FolChang651 |  | FolChang652 |  | FolChang653 |  | FolChang654 |  | FolChang655 |  | FolChang656 |  | FolChang657 |  | FolChang658 |  | FolChang659 |  | FolChang660 |  | FolChang661 |  | FolChang662 |  | FolChang663 |  | FolChang664 |  | FolChang665 |  | FolChang666 |  | FolChang667 |  | FolChang668 |  | FolChang669 |  | FolChang670 |  | FolChang671 |  | FolChang672 |  | FolChang673 |  | FolChang674 |  | FolChang675 |  | FolChang676 |  | FolChang677 |  | FolChang678 |  | FolChang679 |  | FolChang680 |  | FolChang681 |  | FolChang682 |  | FolChang683 |  | FolChang684 |  | FolChang685 |  | FolChang686 |  | FolChang687 |  | FolChang688 |  | FolChang689 |  | FolChang690 |  | FolChang691 |  | FolChang692 |  | FolChang693 |  | FolChang694 |  | FolChang695 |  | FolChang696 |  | FolChang697 |  | FolChang698 |  | FolChang699 |  | FolChang700 |  | FolChang701 |  | FolChang702 |  | FolChang703 |  | FolChang704 |  | FolChang705 |  | FolChang706 |  | FolChang707 |  | FolChang708 |  | FolChang709 |  | FolChang710 |  | FolChang711 |  | FolChang712 |  | FolChang713 |  | FolChang714 |  | FolChang715 |  | FolChang716 |  | FolChang717 |  | FolChang718 |  | FolChang719 |  | FolChang720 |  | FolChang721 |  | FolChang722 |  | FolChang723 |  | FolChang724 |  | FolChang725 |  | FolChang726 |  | FolChang727 |  | FolChang728 |  | FolChang729 |  | FolChang730 |  | FolChang731 |  | FolChang732 |  | FolChang733 |  | FolChang734 |  | FolChang735 |  | FolChang736 |  | FolChang737 |  | FolChang738 |  | FolChang739 |  | FolChang740 |  | FolChang741 |  | FolChang742 |  | FolChang743 |  | FolChang744 |  | FolChang745 |  | FolChang746 |  | FolChang747 |  | FolChang748 |  | FolChang749 |  | FolChang750 |  | FolChang751 |  | FolChang752 |  | FolChang753 |  | FolChang754 |  | FolChang755 |  | FolChang756 |  | FolChang757 |  | FolChang758 |  | FolChang759 |  | FolChang760 |  | FolChang761 |  | FolChang762 |  | FolChang763 |  | FolChang764 |  | FolChang765 |  | FolChang766 |  | FolChang767 |  | FolChang768 |  | FolChang769 |  | FolChang770 |  | FolChang771 |  | FolChang772 |  | FolChang773 |  | FolChang774 |  | FolChang775 |  | FolChang776 |  | FolChang777 |  | FolChang778 |  | FolChang779 |  | FolChang780 |  | FolChang781 |  | FolChang782 |  | FolChang783 |  | FolChang784 |  | FolChang785 |  | FolChang786 |  | FolChang787 |  | FolChang788 |  | FolChang789 |  | FolChang790 |  | FolChang791 |  | FolChang792 |  | FolChang793 |  | FolChang794 |  | FolChang795 |  | FolChang796 |  | FolChang797 |  | FolChang798 |  | FolChang799 |  | FolChang800 |  | FolChang801 |  | FolChang802 |  | FolChang803 |  | FolChang804 |  | FolChang805 |  | FolChang806 |  | FolChang807 |  | FolChang808 |  | FolChang809 |  | FolChang810 |  | FolChang811 |  | FolChang812 |  | FolChang813 |  | FolChang814 |  | FolChang815 |  | FolChang816 |  | FolChang817 |  | FolChang818 |  | FolChang819 |  | FolChang820 |  | FolChang821 |  | FolChang822 |  | FolChang823 |  | FolChang824 |  | FolChang825 |  | FolChang826 |  | FolChang827 |  | FolChang828 |  | FolChang829 |  | FolChang830 |  | FolChang831 |  | FolChang832 |  | FolChang833 |  | FolChang834 |  | FolChang835 |  | FolChang836 |  | FolChang837 |  | FolChang838 |  | FolChang839 |  | FolChang840 |  | FolChang841 |  | FolChang842 |  | FolChang843 |  | FolChang844 |  | FolChang845 |  | FolChang846 |  | FolChang847 |  | FolChang848 |  | FolChang849 |  | FolChang850 |  | FolChang851 |  | FolChang852 |  | FolChang853 |  | FolChang854 |  | FolChang855 |  | FolChang856 |  | FolChang857 |  | FolChang858 |  | FolChang859 |  | FolChang860 |  | FolChang861 |  | FolChang862 |  | FolChang863 |  | FolChang864 |  | FolChang865 |  | FolChang866 |  | FolChang867 |  | FolChang868 |  | FolChang869 |  | FolChang870 |  | FolChang871 |  | FolChang872 |  | FolChang873 |  | FolChang874 |  | FolChang875 |  | FolChang876 |  | FolChang877 |  | FolChang878 |  | FolChang879 |  | FolChang880 |  | FolChang881 |  | FolChang882 |  | FolChang883 |  | FolChang884 |  | FolChang885 |  | FolChang886 |  | FolChang887 |  | FolChang888 |  | FolChang889 |  | FolChang890 |  | FolChang891 |  | FolChang892 |  | FolChang893 |  | FolChang894 |  | FolChang895 |  | FolChang896 |  | FolChang897 |  | FolChang898 |  | FolChang899 |  | FolChang900 |  | FolChang901 |  | FolChang902 |  | FolChang903 |  | FolChang904 |  | FolChang905 |  | FolChang906 |  | FolChang907 |  | FolChang908 |  | FolChang909 |  | FolChang910 |  | FolChang911 |  | FolChang912 |  | FolChang913 |  | FolChang914 |  | FolChang915 |  | FolChang916 |  | FolChang917 |  | FolChang918 |  | FolChang919 |  | FolChang920 |  | FolChang921 |  | FolChang922 |  | FolChang923 |  | FolChang924 |  | FolChang925 |  | FolChang926 |  | FolChang927 |  | FolChang928 |  | FolChang929 |  | FolChang9 |  |
|---------|--|-------------|--|-------------|--|-------------|--|-------------|--|-------------|--|-------------|--|-------------|--|-------------|--|-------------|--|-------------|--|-------------|--|-------------|--|-------------|--|-------------|--|-------------|--|-------------|--|-------------|--|-------------|--|-------------|--|-------------|--|-------------|--|-------------|--|-------------|--|-------------|--|-------------|--|-------------|--|-------------|--|-------------|--|-------------|--|-------------|--|-------------|--|-------------|--|-------------|--|-------------|--|-------------|--|-------------|--|-------------|--|-------------|--|-------------|--|-------------|--|-------------|--|-------------|--|-------------|--|-------------|--|-------------|--|-------------|--|-------------|--|-------------|--|-------------|--|-------------|--|-------------|--|-------------|--|-------------|--|-------------|--|-------------|--|-------------|--|-------------|--|-------------|--|-------------|--|-------------|--|-------------|--|-------------|--|-------------|--|-------------|--|-------------|--|-------------|--|-------------|--|-------------|--|-------------|--|-------------|--|-------------|--|-------------|--|-------------|--|-------------|--|-------------|--|-------------|--|-------------|--|-------------|--|-------------|--|-------------|--|-------------|--|-------------|--|-------------|--|-------------|--|-------------|--|-------------|--|-------------|--|-------------|--|-------------|--|-------------|--|-------------|--|-------------|--|-------------|--|-------------|--|-------------|--|-------------|--|-------------|--|-------------|--|-------------|--|-------------|--|-------------|--|-------------|--|-------------|--|-------------|--|-------------|--|-------------|--|-------------|--|-------------|--|-------------|--|-------------|--|-------------|--|-------------|--|-------------|--|-------------|--|-------------|--|-------------|--|-------------|--|-------------|--|-------------|--|-------------|--|-------------|--|-------------|--|-------------|--|-------------|--|-------------|--|-------------|--|-------------|--|-------------|--|-------------|--|-------------|--|-------------|--|-------------|--|-------------|--|-------------|--|-------------|--|-------------|--|-------------|--|-------------|--|-------------|--|-------------|--|-------------|--|-------------|--|-------------|--|-------------|--|-------------|--|-------------|--|-------------|--|-------------|--|-------------|--|-------------|--|-------------|--|-------------|--|-------------|--|-------------|--|-------------|--|-------------|--|-------------|--|-------------|--|-------------|--|-------------|--|-------------|--|-------------|--|-------------|--|-------------|--|-------------|--|-------------|--|-------------|--|-------------|--|-------------|--|-------------|--|-------------|--|-------------|--|-------------|--|-------------|--|-------------|--|-------------|--|-------------|--|-------------|--|-------------|--|-------------|--|-------------|--|-------------|--|-------------|--|-------------|--|-------------|--|-------------|--|-------------|--|-------------|--|-------------|--|-------------|--|-------------|--|-------------|--|-------------|--|-------------|--|-------------|--|-------------|--|-------------|--|-------------|--|-------------|--|-------------|--|-------------|--|-------------|--|-------------|--|-------------|--|-------------|--|-------------|--|-------------|--|-------------|--|-------------|--|-------------|--|-------------|--|-------------|--|-------------|--|-------------|--|-------------|--|-------------|--|-------------|--|-------------|--|-------------|--|-------------|--|-------------|--|-------------|--|-------------|--|-------------|--|-------------|--|-------------|--|-------------|--|-------------|--|-------------|--|-------------|--|-------------|--|-------------|--|-------------|--|-------------|--|-------------|--|-------------|--|-------------|--|-------------|--|-------------|--|-------------|--|-------------|--|-------------|--|-------------|--|-------------|--|-------------|--|-------------|--|-------------|--|-------------|--|-------------|--|-------------|--|-------------|--|-------------|--|-------------|--|-------------|--|-------------|--|-------------|--|-------------|--|-------------|--|-------------|--|-------------|--|-------------|--|-------------|--|-------------|--|-------------|--|-------------|--|-------------|--|-------------|--|-------------|--|-------------|--|-------------|--|-------------|--|-------------|--|-------------|--|-------------|--|-------------|--|-------------|--|-------------|--|-------------|--|-------------|--|-------------|--|-------------|--|-------------|--|-------------|--|-------------|--|-------------|--|-------------|--|-------------|--|-------------|--|-------------|--|-------------|--|-------------|--|-------------|--|-------------|--|-------------|--|-------------|--|-------------|--|-------------|--|-------------|--|-------------|--|-------------|--|-------------|--|-------------|--|-------------|--|-------------|--|-------------|--|-------------|--|-------------|--|-------------|--|-------------|--|-------------|--|-------------|--|-------------|--|-------------|--|-------------|--|-------------|--|-------------|--|-------------|--|-------------|--|-------------|--|-------------|--|-------------|--|-------------|--|-------------|--|-------------|--|-------------|--|-------------|--|-------------|--|-------------|--|-------------|--|-------------|--|-------------|--|-------------|--|-------------|--|-------------|--|-------------|--|-------------|--|-------------|--|-------------|--|-------------|--|-------------|--|-------------|--|-------------|--|-------------|--|-------------|--|-------------|--|-------------|--|-------------|--|-------------|--|-------------|--|-------------|--|-------------|--|-------------|--|-------------|--|-------------|--|-------------|--|-------------|--|-------------|--|-------------|--|-------------|--|-------------|--|-------------|--|-------------|--|-------------|--|-------------|--|-------------|--|-------------|--|-------------|--|-------------|--|-------------|--|-------------|--|-------------|--|-------------|--|-------------|--|-------------|--|-------------|--|-------------|--|-------------|--|-------------|--|-------------|--|-------------|--|-------------|--|-------------|--|-------------|--|-------------|--|-------------|--|-------------|--|-------------|--|-------------|--|-------------|--|-------------|--|-------------|--|-------------|--|-------------|--|-------------|--|-------------|--|-------------|--|-------------|--|-------------|--|-------------|--|-------------|--|-------------|--|-------------|--|-------------|--|-------------|--|-------------|--|-------------|--|-------------|--|-------------|--|-------------|--|-------------|--|-------------|--|-------------|--|-------------|--|-------------|--|-------------|--|-------------|--|-------------|--|-------------|--|-------------|--|-------------|--|-------------|--|-------------|--|-------------|--|-------------|--|-------------|--|-------------|--|-------------|--|-------------|--|-------------|--|-------------|--|-------------|--|-------------|--|-------------|--|-------------|--|-------------|--|-------------|--|-------------|--|-------------|--|-------------|--|-------------|--|-------------|--|-------------|--|-------------|--|-------------|--|-------------|--|-------------|--|-------------|--|-------------|--|-------------|--|-------------|--|-------------|--|-------------|--|-------------|--|-------------|--|-------------|--|-------------|--|-------------|--|-------------|--|-------------|--|-------------|--|-------------|--|-------------|--|-------------|--|-------------|--|-------------|--|-------------|--|-------------|--|-------------|--|-------------|--|-------------|--|-------------|--|-------------|--|-------------|--|-------------|--|-------------|--|-------------|--|-------------|--|-------------|--|-------------|--|-------------|--|-------------|--|-------------|--|-------------|--|-------------|--|-------------|--|-------------|--|-------------|--|-------------|--|-------------|--|-------------|--|-------------|--|-------------|--|-------------|--|-------------|--|-------------|--|-------------|--|-------------|--|-------------|--|-------------|--|-------------|--|-------------|--|-------------|--|-------------|--|-------------|--|-------------|--|-------------|--|-------------|--|-------------|--|-------------|--|-------------|--|-------------|--|-------------|--|-------------|--|-------------|--|-------------|--|-------------|--|-------------|--|-------------|--|-------------|--|-------------|--|-------------|--|-------------|--|-------------|--|-------------|--|-------------|--|-------------|--|-------------|--|-------------|--|-------------|--|-------------|--|-------------|--|-------------|--|-------------|--|-------------|--|-------------|--|-------------|--|-------------|--|-------------|--|-------------|--|-------------|--|-------------|--|-------------|--|-------------|--|-------------|--|-------------|--|-------------|--|-------------|--|-------------|--|-------------|--|-------------|--|-------------|--|-------------|--|-------------|--|-------------|--|-------------|--|-------------|--|-------------|--|-------------|--|-------------|--|-------------|--|-------------|--|-------------|--|-------------|--|-------------|--|-------------|--|-------------|--|-------------|--|-------------|--|-------------|--|-------------|--|-------------|--|-------------|--|-------------|--|-------------|--|-------------|--|-------------|--|-------------|--|-------------|--|-------------|--|-------------|--|-------------|--|-------------|--|-------------|--|-------------|--|-------------|--|-------------|--|-------------|--|-------------|--|-------------|--|-------------|--|-------------|--|-------------|--|-------------|--|-------------|--|-------------|--|-------------|--|-------------|--|-------------|--|-------------|--|-------------|--|-------------|--|-------------|--|-------------|--|-------------|--|-------------|--|-------------|--|-------------|--|-------------|--|-------------|--|-------------|--|-------------|--|-------------|--|-------------|--|-------------|--|-------------|--|-------------|--|-------------|--|-------------|--|-------------|--|-------------|--|-------------|--|-------------|--|-------------|--|-------------|--|-------------|--|-------------|--|-------------|--|-------------|--|-------------|--|-------------|--|-------------|--|-------------|--|-------------|--|-------------|--|-------------|--|-------------|--|-------------|--|-------------|--|-------------|--|-------------|--|-------------|--|-------------|--|-------------|--|-------------|--|-------------|--|-------------|--|-------------|--|-------------|--|-------------|--|-------------|--|-------------|--|-------------|--|-------------|--|-------------|--|-------------|--|-------------|--|-------------|--|-------------|--|-------------|--|-------------|--|-------------|--|-------------|--|-------------|--|-------------|--|-------------|--|-------------|--|-------------|--|-------------|--|-------------|--|-------------|--|-------------|--|-------------|--|-------------|--|-------------|--|-------------|--|-------------|--|-------------|--|-------------|--|-------------|--|-------------|--|-------------|--|-------------|--|-------------|--|-------------|--|-------------|--|-------------|--|-------------|--|-------------|--|-------------|--|-------------|--|-------------|--|-------------|--|-------------|--|-------------|--|-------------|--|-------------|--|-------------|--|-------------|--|-------------|--|-------------|--|-------------|--|-------------|--|-------------|--|-------------|--|-------------|--|-------------|--|-------------|--|-------------|--|-------------|--|-------------|--|-------------|--|-------------|--|-------------|--|-------------|--|-------------|--|-------------|--|-------------|--|-------------|--|-------------|--|-------------|--|-------------|--|-------------|--|-------------|--|-------------|--|-------------|--|-------------|--|-------------|--|-------------|--|-------------|--|-------------|--|-------------|--|-------------|--|-------------|--|-------------|--|-------------|--|-------------|--|-------------|--|-------------|--|-------------|--|-------------|--|-------------|--|-------------|--|-------------|--|-------------|--|-------------|--|-------------|--|-------------|--|-------------|--|-------------|--|-------------|--|-------------|--|-------------|--|-------------|--|-------------|--|-------------|--|-------------|--|-------------|--|-------------|--|-------------|--|-------------|--|-------------|--|-------------|--|-------------|--|-------------|--|-------------|--|-------------|--|-------------|--|-------------|--|-------------|--|-------------|--|-------------|--|-------------|--|-------------|--|-------------|--|-------------|--|-------------|--|-------------|--|-------------|--|-------------|--|-------------|--|-------------|--|-------------|--|-------------|--|-------------|--|-------------|--|-------------|--|-------------|--|-------------|--|-------------|--|-------------|--|-------------|--|-------------|--|-------------|--|-------------|--|-------------|--|-------------|--|-------------|--|-------------|--|-------------|--|-------------|--|-------------|--|-------------|--|-------------|--|-------------|--|-------------|--|-------------|--|-------------|--|-------------|--|-------------|--|-------------|--|-------------|--|-------------|--|-------------|--|-------------|--|-------------|--|-------------|--|-------------|--|-------------|--|-------------|--|-------------|--|-------------|--|-------------|--|-------------|--|-------------|--|-----------|--|
|---------|--|-------------|--|-------------|--|-------------|--|-------------|--|-------------|--|-------------|--|-------------|--|-------------|--|-------------|--|-------------|--|-------------|--|-------------|--|-------------|--|-------------|--|-------------|--|-------------|--|-------------|--|-------------|--|-------------|--|-------------|--|-------------|--|-------------|--|-------------|--|-------------|--|-------------|--|-------------|--|-------------|--|-------------|--|-------------|--|-------------|--|-------------|--|-------------|--|-------------|--|-------------|--|-------------|--|-------------|--|-------------|--|-------------|--|-------------|--|-------------|--|-------------|--|-------------|--|-------------|--|-------------|--|-------------|--|-------------|--|-------------|--|-------------|--|-------------|--|-------------|--|-------------|--|-------------|--|-------------|--|-------------|--|-------------|--|-------------|--|-------------|--|-------------|--|-------------|--|-------------|--|-------------|--|-------------|--|-------------|--|-------------|--|-------------|--|-------------|--|-------------|--|-------------|--|-------------|--|-------------|--|-------------|--|-------------|--|-------------|--|-------------|--|-------------|--|-------------|--|-------------|--|-------------|--|-------------|--|-------------|--|-------------|--|-------------|--|-------------|--|-------------|--|-------------|--|-------------|--|-------------|--|-------------|--|-------------|--|-------------|--|-------------|--|-------------|--|-------------|--|-------------|--|-------------|--|-------------|--|-------------|--|-------------|--|-------------|--|-------------|--|-------------|--|-------------|--|-------------|--|-------------|--|-------------|--|-------------|--|-------------|--|-------------|--|-------------|--|-------------|--|-------------|--|-------------|--|-------------|--|-------------|--|-------------|--|-------------|--|-------------|--|-------------|--|-------------|--|-------------|--|-------------|--|-------------|--|-------------|--|-------------|--|-------------|--|-------------|--|-------------|--|-------------|--|-------------|--|-------------|--|-------------|--|-------------|--|-------------|--|-------------|--|-------------|--|-------------|--|-------------|--|-------------|--|-------------|--|-------------|--|-------------|--|-------------|--|-------------|--|-------------|--|-------------|--|-------------|--|-------------|--|-------------|--|-------------|--|-------------|--|-------------|--|-------------|--|-------------|--|-------------|--|-------------|--|-------------|--|-------------|--|-------------|--|-------------|--|-------------|--|-------------|--|-------------|--|-------------|--|-------------|--|-------------|--|-------------|--|-------------|--|-------------|--|-------------|--|-------------|--|-------------|--|-------------|--|-------------|--|-------------|--|-------------|--|-------------|--|-------------|--|-------------|--|-------------|--|-------------|--|-------------|--|-------------|--|-------------|--|-------------|--|-------------|--|-------------|--|-------------|--|-------------|--|-------------|--|-------------|--|-------------|--|-------------|--|-------------|--|-------------|--|-------------|--|-------------|--|-------------|--|-------------|--|-------------|--|-------------|--|-------------|--|-------------|--|-------------|--|-------------|--|-------------|--|-------------|--|-------------|--|-------------|--|-------------|--|-------------|--|-------------|--|-------------|--|-------------|--|-------------|--|-------------|--|-------------|--|-------------|--|-------------|--|-------------|--|-------------|--|-------------|--|-------------|--|-------------|--|-------------|--|-------------|--|-------------|--|-------------|--|-------------|--|-------------|--|-------------|--|-------------|--|-------------|--|-------------|--|-------------|--|-------------|--|-------------|--|-------------|--|-------------|--|-------------|--|-------------|--|-------------|--|-------------|--|-------------|--|-------------|--|-------------|--|-------------|--|-------------|--|-------------|--|-------------|--|-------------|--|-------------|--|-------------|--|-------------|--|-------------|--|-------------|--|-------------|--|-------------|--|-------------|--|-------------|--|-------------|--|-------------|--|-------------|--|-------------|--|-------------|--|-------------|--|-------------|--|-------------|--|-------------|--|-------------|--|-------------|--|-------------|--|-------------|--|-------------|--|-------------|--|-------------|--|-------------|--|-------------|--|-------------|--|-------------|--|-------------|--|-------------|--|-------------|--|-------------|--|-------------|--|-------------|--|-------------|--|-------------|--|-------------|--|-------------|--|-------------|--|-------------|--|-------------|--|-------------|--|-------------|--|-------------|--|-------------|--|-------------|--|-------------|--|-------------|--|-------------|--|-------------|--|-------------|--|-------------|--|-------------|--|-------------|--|-------------|--|-------------|--|-------------|--|-------------|--|-------------|--|-------------|--|-------------|--|-------------|--|-------------|--|-------------|--|-------------|--|-------------|--|-------------|--|-------------|--|-------------|--|-------------|--|-------------|--|-------------|--|-------------|--|-------------|--|-------------|--|-------------|--|-------------|--|-------------|--|-------------|--|-------------|--|-------------|--|-------------|--|-------------|--|-------------|--|-------------|--|-------------|--|-------------|--|-------------|--|-------------|--|-------------|--|-------------|--|-------------|--|-------------|--|-------------|--|-------------|--|-------------|--|-------------|--|-------------|--|-------------|--|-------------|--|-------------|--|-------------|--|-------------|--|-------------|--|-------------|--|-------------|--|-------------|--|-------------|--|-------------|--|-------------|--|-------------|--|-------------|--|-------------|--|-------------|--|-------------|--|-------------|--|-------------|--|-------------|--|-------------|--|-------------|--|-------------|--|-------------|--|-------------|--|-------------|--|-------------|--|-------------|--|-------------|--|-------------|--|-------------|--|-------------|--|-------------|--|-------------|--|-------------|--|-------------|--|-------------|--|-------------|--|-------------|--|-------------|--|-------------|--|-------------|--|-------------|--|-------------|--|-------------|--|-------------|--|-------------|--|-------------|--|-------------|--|-------------|--|-------------|--|-------------|--|-------------|--|-------------|--|-------------|--|-------------|--|-------------|--|-------------|--|-------------|--|-------------|--|-------------|--|-------------|--|-------------|--|-------------|--|-------------|--|-------------|--|-------------|--|-------------|--|-------------|--|-------------|--|-------------|--|-------------|--|-------------|--|-------------|--|-------------|--|-------------|--|-------------|--|-------------|--|-------------|--|-------------|--|-------------|--|-------------|--|-------------|--|-------------|--|-------------|--|-------------|--|-------------|--|-------------|--|-------------|--|-------------|--|-------------|--|-------------|--|-------------|--|-------------|--|-------------|--|-------------|--|-------------|--|-------------|--|-------------|--|-------------|--|-------------|--|-------------|--|-------------|--|-------------|--|-------------|--|-------------|--|-------------|--|-------------|--|-------------|--|-------------|--|-------------|--|-------------|--|-------------|--|-------------|--|-------------|--|-------------|--|-------------|--|-------------|--|-------------|--|-------------|--|-------------|--|-------------|--|-------------|--|-------------|--|-------------|--|-------------|--|-------------|--|-------------|--|-------------|--|-------------|--|-------------|--|-------------|--|-------------|--|-------------|--|-------------|--|-------------|--|-------------|--|-------------|--|-------------|--|-------------|--|-------------|--|-------------|--|-------------|--|-------------|--|-------------|--|-------------|--|-------------|--|-------------|--|-------------|--|-------------|--|-------------|--|-------------|--|-------------|--|-------------|--|-------------|--|-------------|--|-------------|--|-------------|--|-------------|--|-------------|--|-------------|--|-------------|--|-------------|--|-------------|--|-------------|--|-------------|--|-------------|--|-------------|--|-------------|--|-------------|--|-------------|--|-------------|--|-------------|--|-------------|--|-------------|--|-------------|--|-------------|--|-------------|--|-------------|--|-------------|--|-------------|--|-------------|--|-------------|--|-------------|--|-------------|--|-------------|--|-------------|--|-------------|--|-------------|--|-------------|--|-------------|--|-------------|--|-------------|--|-------------|--|-------------|--|-------------|--|-------------|--|-------------|--|-------------|--|-------------|--|-------------|--|-------------|--|-------------|--|-------------|--|-------------|--|-------------|--|-------------|--|-------------|--|-------------|--|-------------|--|-------------|--|-------------|--|-------------|--|-------------|--|-------------|--|-------------|--|-------------|--|-------------|--|-------------|--|-------------|--|-------------|--|-------------|--|-------------|--|-------------|--|-------------|--|-------------|--|-------------|--|-------------|--|-------------|--|-------------|--|-------------|--|-------------|--|-------------|--|-------------|--|-------------|--|-------------|--|-------------|--|-------------|--|-------------|--|-------------|--|-------------|--|-------------|--|-------------|--|-------------|--|-------------|--|-------------|--|-------------|--|-------------|--|-------------|--|-------------|--|-------------|--|-------------|--|-------------|--|-------------|--|-------------|--|-------------|--|-------------|--|-------------|--|-------------|--|-------------|--|-------------|--|-------------|--|-------------|--|-------------|--|-------------|--|-------------|--|-------------|--|-------------|--|-------------|--|-------------|--|-------------|--|-------------|--|-------------|--|-------------|--|-------------|--|-------------|--|-------------|--|-------------|--|-------------|--|-------------|--|-------------|--|-------------|--|-------------|--|-------------|--|-------------|--|-------------|--|-------------|--|-------------|--|-------------|--|-------------|--|-------------|--|-------------|--|-------------|--|-------------|--|-------------|--|-------------|--|-------------|--|-------------|--|-------------|--|-------------|--|-------------|--|-------------|--|-------------|--|-------------|--|-------------|--|-------------|--|-------------|--|-------------|--|-------------|--|-------------|--|-------------|--|-------------|--|-------------|--|-------------|--|-------------|--|-------------|--|-------------|--|-------------|--|-------------|--|-------------|--|-------------|--|-------------|--|-------------|--|-------------|--|-------------|--|-------------|--|-------------|--|-------------|--|-------------|--|-------------|--|-------------|--|-------------|--|-------------|--|-------------|--|-------------|--|-------------|--|-------------|--|-------------|--|-------------|--|-------------|--|-------------|--|-------------|--|-------------|--|-------------|--|-------------|--|-------------|--|-------------|--|-------------|--|-------------|--|-------------|--|-------------|--|-------------|--|-------------|--|-------------|--|-------------|--|-------------|--|-------------|--|-------------|--|-------------|--|-------------|--|-------------|--|-------------|--|-------------|--|-------------|--|-------------|--|-------------|--|-------------|--|-------------|--|-------------|--|-------------|--|-------------|--|-------------|--|-------------|--|-------------|--|-------------|--|-------------|--|-------------|--|-------------|--|-------------|--|-------------|--|-------------|--|-------------|--|-------------|--|-------------|--|-------------|--|-------------|--|-------------|--|-------------|--|-------------|--|-------------|--|-------------|--|-------------|--|-------------|--|-------------|--|-------------|--|-------------|--|-------------|--|-------------|--|-------------|--|-------------|--|-------------|--|-------------|--|-------------|--|-------------|--|-------------|--|-------------|--|-------------|--|-------------|--|-------------|--|-------------|--|-------------|--|-------------|--|-------------|--|-------------|--|-------------|--|-------------|--|-------------|--|-------------|--|-------------|--|-------------|--|-------------|--|-------------|--|-------------|--|-------------|--|-------------|--|-------------|--|-------------|--|-------------|--|-------------|--|-------------|--|-------------|--|-------------|--|-------------|--|-------------|--|-------------|--|-------------|--|-------------|--|-------------|--|-------------|--|-------------|--|-------------|--|-------------|--|-------------|--|-------------|--|-------------|--|-------------|--|-------------|--|-------------|--|-------------|--|-------------|--|-------------|--|-------------|--|-------------|--|-------------|--|-------------|--|-------------|--|-------------|--|-------------|--|-------------|--|-------------|--|-------------|--|-------------|--|-------------|--|-------------|--|-------------|--|-------------|--|-------------|--|-------------|--|-------------|--|-------------|--|-------------|--|-------------|--|-------------|--|-------------|--|-------------|--|-----------|--|

File: ESM\_10 (Online Resource 10)

Figure: Comparative Multidimensional Molecular Analyses of Pediatric Diffuse Intrinsic Glioma Reveals Distinct Molecular Subtypes  
Journal: Acta Neuropathologica

Authors: Amanda M. Stransik, Madhuri Kumbhakar, Kendall Snyder, Sidicki Yavuz, Joe Devenney, Brennan Harmon, Jordan Hall, Eric H. Rubie, Ping An, Melanie Weingart, Brian Ross, Sarah Mages, Roger J. Packer, Javad Nazarian

Corresponding Author:

Javad Nazarian, Children's National Medical Center, Center for Genetic Medicine  
111 Michigan Ave., NW, Washington DC, 20010  
Phone: 202-476-6022 Fax: 202-476-6014  
Email: J.Nazarian@CNMC.org

| p-value |  | FoldChange101 |  | FoldChange111 |  | FoldChange121 |  | FoldChange131 |  | FoldChange141 |  | FoldChange151 |  | FoldChange161 |  | FoldChange171 |  | FoldChange181 |  | FoldChange191 |  | FoldChange201 |  | FoldChange211 |  | FoldChange221 |  | FoldChange231 |  | FoldChange241 |  | FoldChange251 |  | FoldChange261 |  | FoldChange271 |  | FoldChange281 |  | FoldChange291 |  | FoldChange301 |  | FoldChange311 |  | FoldChange321 |  | FoldChange331 |  | FoldChange341 |  | FoldChange351 |  | FoldChange361 |  | FoldChange371 |  | FoldChange381 |  | FoldChange391 |  | FoldChange401 |  | FoldChange411 |  | FoldChange421 |  | FoldChange431 |  | FoldChange441 |  | FoldChange451 |  | FoldChange461 |  | FoldChange471 |  | FoldChange481 |  | FoldChange491 |  | FoldChange501 |  | FoldChange511 |  | FoldChange521 |  | FoldChange531 |  | FoldChange541 |  | FoldChange551 |  | FoldChange561 |  | FoldChange571 |  | FoldChange581 |  | FoldChange591 |  | FoldChange601 |  | FoldChange611 |  | FoldChange621 |  | FoldChange631 |  | FoldChange641 |  | FoldChange651 |  | FoldChange661 |  | FoldChange671 |  | FoldChange681 |  | FoldChange691 |  | FoldChange701 |  | FoldChange711 |  | FoldChange721 |  | FoldChange731 |  | FoldChange741 |  | FoldChange751 |  | FoldChange761 |  | FoldChange771 |  | FoldChange781 |  | FoldChange791 |  | FoldChange801 |  | FoldChange811 |  | FoldChange821 |  | FoldChange831 |  | FoldChange841 |  | FoldChange851 |  | FoldChange861 |  | FoldChange871 |  | FoldChange881 |  | FoldChange891 |  | FoldChange901 |  | FoldChange911 |  | FoldChange921 |  | FoldChange931 |  | FoldChange941 |  | FoldChange951 |  | FoldChange961 |  | FoldChange971 |  | FoldChange981 |  | FoldChange991 |  | FoldChange1001 |  | FoldChange1011 |  | FoldChange1021 |  | FoldChange1031 |  | FoldChange1041 |  | FoldChange1051 |  | FoldChange1061 |  | FoldChange1071 |  | FoldChange1081 |  | FoldChange1091 |  | FoldChange1101 |  | FoldChange1111 |  | FoldChange1121 |  | FoldChange1131 |  | FoldChange1141 |  | FoldChange1151 |  | FoldChange1161 |  | FoldChange1171 |  | FoldChange1181 |  | FoldChange1191 |  | FoldChange1201 |  | FoldChange1211 |  | FoldChange1221 |  | FoldChange1231 |  | FoldChange1241 |  | FoldChange1251 |  | FoldChange1261 |  | FoldChange1271 |  | FoldChange1281 |  | FoldChange1291 |  | FoldChange1301 |  | FoldChange1311 |  | FoldChange1321 |  | FoldChange1331 |  | FoldChange1341 |  | FoldChange1351 |  | FoldChange1361 |  | FoldChange1371 |  | FoldChange1381 |  | FoldChange1391 |  | FoldChange1401 |  | FoldChange1411 |  | FoldChange1421 |  | FoldChange1431 |  | FoldChange1441 |  | FoldChange1451 |  | FoldChange1461 |  | FoldChange1471 |  | FoldChange1481 |  | FoldChange1491 |  | FoldChange1501 |  | FoldChange1511 |  | FoldChange1521 |  | FoldChange1531 |  | FoldChange1541 |  | FoldChange1551 |  | FoldChange1561 |  | FoldChange1571 |  | FoldChange1581 |  | FoldChange1591 |  | FoldChange1601 |  | FoldChange1611 |  | FoldChange1621 |  | FoldChange1631 |  | FoldChange1641 |  | FoldChange1651 |  | FoldChange1661 |  | FoldChange1671 |  | FoldChange1681 |  | FoldChange1691 |  | FoldChange1701 |  | FoldChange1711 |  | FoldChange1721 |  | FoldChange1731 |  | FoldChange1741 |  | FoldChange1751 |  | FoldChange1761 |  | FoldChange1771 |  | FoldChange1781 |  | FoldChange1791 |  | FoldChange1801 |  | FoldChange1811 |  | FoldChange1821 |  | FoldChange1831 |  | FoldChange1841 |  | FoldChange1851 |  | FoldChange1861 |  | FoldChange1871 |  | FoldChange1881 |  | FoldChange1891 |  | FoldChange1901 |  | FoldChange1911 |  | FoldChange1921 |  | FoldChange1931 |  | FoldChange1941 |  | FoldChange1951 |  | FoldChange1961 |  | FoldChange1971 |  | FoldChange1981 |  | FoldChange1991 |  | FoldChange2001 |  | FoldChange2011 |  | FoldChange2021 |  | FoldChange2031 |  | FoldChange2041 |  | FoldChange2051 |  | FoldChange2061 |  | FoldChange2071 |  | FoldChange2081 |  | FoldChange2091 |  | FoldChange2101 |  | FoldChange2111 |  | FoldChange2121 |  | FoldChange2131 |  | FoldChange2141 |  | FoldChange2151 |  | FoldChange2161 |  | FoldChange2171 |  | FoldChange2181 |  | FoldChange2191 |  | FoldChange2201 |  | FoldChange2211 |  | FoldChange2221 |  | FoldChange2231 |  | FoldChange2241 |  | FoldChange2251 |  | FoldChange2261 |  | FoldChange2271 |  | FoldChange2281 |  | FoldChange2291 |  | FoldChange2301 |  | FoldChange2311 |  | FoldChange2321 |  | FoldChange2331 |  | FoldChange2341 |  | FoldChange2351 |  | FoldChange2361 |  | FoldChange2371 |  | FoldChange2381 |  | FoldChange2391 |  | FoldChange2401 |  | FoldChange2411 |  | FoldChange2421 |  | FoldChange2431 |  | FoldChange2441 |  | FoldChange2451 |  | FoldChange2461 |  | FoldChange2471 |  | FoldChange2481 |  | FoldChange2491 |  | FoldChange2501 |  | FoldChange2511 |  | FoldChange2521 |  | FoldChange2531 |  | FoldChange2541 |  | FoldChange2551 |  | FoldChange2561 |  | FoldChange2571 |  | FoldChange2581 |  | FoldChange2591 |  | FoldChange2601 |  | FoldChange2611 |  | FoldChange2621 |  | FoldChange2631 |  | FoldChange2641 |  | FoldChange2651 |  | FoldChange2661 |  | FoldChange2671 |  | FoldChange2681 |  | FoldChange2691 |  | FoldChange2701 |  | FoldChange2711 |  | FoldChange2721 |  | FoldChange2731 |  | FoldChange2741 |  | FoldChange2751 |  | FoldChange2761 |  | FoldChange2771 |  | FoldChange2781 |  | FoldChange2791 |  | FoldChange2801 |  | FoldChange2811 |  | FoldChange2821 |  | FoldChange2831 |  | FoldChange2841 |  | FoldChange2851 |  | FoldChange2861 |  | FoldChange2871 |  | FoldChange2881 |  | FoldChange2891 |  | FoldChange2901 |  | FoldChange2911 |  | FoldChange2921 |  | FoldChange2931 |  | FoldChange2941 |  | FoldChange2951 |  | FoldChange2961 |  | FoldChange2971 |  | FoldChange2981 |  | FoldChange2991 |  | FoldChange3001 |  | FoldChange3011 |  | FoldChange3021 |  | FoldChange3031 |  | FoldChange3041 |  | FoldChange3051 |  | FoldChange3061 |  | FoldChange3071 |  | FoldChange3081 |  | FoldChange3091 |  | FoldChange3101 |  | FoldChange3111 |  | FoldChange3121 |  | FoldChange3131 |  | FoldChange3141 |  | FoldChange3151 |  | FoldChange3161 |  | FoldChange3171 |  | FoldChange3181 |  | FoldChange3191 |  | FoldChange3201 |  | FoldChange3211 |  | FoldChange3221 |  | FoldChange3231 |  | FoldChange3241 |  | FoldChange3251 |  | FoldChange3261 |  | FoldChange3271 |  | FoldChange3281 |  | FoldChange3291 |  | FoldChange3301 |  | FoldChange3311 |  | FoldChange3321 |  | FoldChange3331 |  | FoldChange3341 |  | FoldChange3351 |  | FoldChange3361 |  | FoldChange3371 |  | FoldChange3381 |  | FoldChange3391 |  | FoldChange3401 |  | FoldChange3411 |  | FoldChange3421 |  | FoldChange3431 |  | FoldChange3441 |  | FoldChange3451 |  | FoldChange3461 |  | FoldChange3471 |  | FoldChange3481 |  | FoldChange3491 |  | FoldChange3501 |  | FoldChange3511 |  | FoldChange3521 |  | FoldChange3531 |  | FoldChange3541 |  | FoldChange3551 |  | FoldChange3561 |  | FoldChange3571 |  | FoldChange3581 |  | FoldChange3591 |  | FoldChange3601 |  | FoldChange3611 |  | FoldChange3621 |  | FoldChange3631 |  | FoldChange3641 |  | FoldChange3651 |  | FoldChange3661 |  | FoldChange3671 |  | FoldChange3681 |  | FoldChange3691 |  | FoldChange3701 |  | FoldChange3711 |  | FoldChange3721 |  | FoldChange3731 |  | FoldChange3741 |  | FoldChange3751 |  | FoldChange3761 |  | FoldChange3771 |  | FoldChange3781 |  | FoldChange3791 |  | FoldChange3801 |  | FoldChange3811 |  | FoldChange3821 |  | FoldChange3831 |  | FoldChange3841 |  | FoldChange3851 |  | FoldChange3861 |  | FoldChange3871 |  | FoldChange3881 |  | FoldChange3891 |  | FoldChange3901 |  | FoldChange3911 |  | FoldChange3921 |  | FoldChange3931 |  | FoldChange3941 |  | FoldChange3951 |  | FoldChange3961 |  | FoldChange3971 |  | FoldChange3981 |  | FoldChange3991 |  | FoldChange4001 |  | FoldChange4011 |  | FoldChange4021 |  | FoldChange4031 |  | FoldChange4041 |  | FoldChange4051 |  | FoldChange4061 |  | FoldChange4071 |  | FoldChange4081 |  | FoldChange4091 |  | FoldChange4101 |  | FoldChange4111 |  | FoldChange4121 |  | FoldChange4131 |  | FoldChange4141 |  | FoldChange4151 |  | FoldChange4161 |  | FoldChange4171 |  | FoldChange4181 |  | FoldChange4191 |  | FoldChange4201 |  | FoldChange4211 |  | FoldChange4221 |  | FoldChange4231 |  | FoldChange4241 |  | FoldChange4251 |  | FoldChange4261 |  | FoldChange4271 |  | FoldChange4281 |  | FoldChange4291 |  | FoldChange4301 |  | FoldChange4311 |  | FoldChange4321 |  | FoldChange4331 |  | FoldChange4341 |  | FoldChange4351 |  | FoldChange4361 |  | FoldChange4371 |  | FoldChange4381 |  | FoldChange4391 |  | FoldChange4401 |  | FoldChange4411 |  | FoldChange4421 |  | FoldChange4431 |  | FoldChange4441 |  | FoldChange4451 |  | FoldChange4461 |  | FoldChange4471 |  | FoldChange4481 |  | FoldChange4491 |  | FoldChange4501 |  | FoldChange4511 |  | FoldChange4521 |  | FoldChange4531 |  | FoldChange4541 |  | FoldChange4551 |  | FoldChange4561 |  | FoldChange4571 |  | FoldChange4581 |  | FoldChange4591 |  | FoldChange4601 |  | FoldChange4611 |  | FoldChange4621 |  | FoldChange4631 |  | FoldChange4641 |  | FoldChange4651 |  | FoldChange4661 |  | FoldChange4671 |  | FoldChange4681 |  | FoldChange4691 |  | FoldChange4701 |  | FoldChange4711 |  | FoldChange4721 |  | FoldChange4731 |  | FoldChange4741 |  | FoldChange4751 |  | FoldChange4761 |  | FoldChange4771 |  | FoldChange4781 |  | FoldChange4791 |  | FoldChange4801 |  | FoldChange4811 |  | FoldChange4821 |  | FoldChange4831 |  | FoldChange4841 |  | FoldChange4851 |  | FoldChange4861 |  | FoldChange4871 |  | FoldChange4881 |  | FoldChange4891 |  | FoldChange4901 |  | FoldChange4911 |  | FoldChange4921 |  | FoldChange4931 |  | FoldChange4941 |  | FoldChange4951 |  | FoldChange4961 |  | FoldChange4971 |  | FoldChange4981 |  | FoldChange4991 |  | FoldChange5001 |  | FoldChange5011 |  | FoldChange5021 |  | FoldChange5031 |  | FoldChange5041 |  | FoldChange5051 |  | FoldChange5061 |  | FoldChange5071 |  | FoldChange5081 |  | FoldChange5091 |  | FoldChange5101 |  | FoldChange5111 |  | FoldChange5121 |  | FoldChange5131 |  | FoldChange5141 |  | FoldChange5151 |  | FoldChange5161 |  | FoldChange5171 |  | FoldChange5181 |  | FoldChange5191 |  | FoldChange5201 |  | FoldChange5211 |  | FoldChange5221 |  | FoldChange5231 |  | FoldChange5241 |  | FoldChange5251 |  | FoldChange5261 |  | FoldChange5271 |  | FoldChange5281 |  | FoldChange5291 |  | FoldChange5301 |  | FoldChange5311 |  | FoldChange5321 |  | FoldChange5331 |  | FoldChange5341 |  | FoldChange5351 |  | FoldChange5361 |  | FoldChange5371 |  | FoldChange5381 |  | FoldChange5391 |  | FoldChange5401 |  | FoldChange5411 |  | FoldChange5421 |  | FoldChange5431 |  | FoldChange5441 |  | FoldChange5451 |  | FoldChange5461 |  | FoldChange5471 |  | FoldChange5481 |  | FoldChange5491 |  | FoldChange5501 |  | FoldChange5511 |  | FoldChange5521 |  | FoldChange5531 |  | FoldChange5541 |  | FoldChange5551 |  | FoldChange5561 |  | FoldChange5571 |  | FoldChange5581 |  | FoldChange5591 |  | FoldChange5601 |  | FoldChange5611 |  | FoldChange5621 |  | FoldChange5631 |  | FoldChange5641 |  | FoldChange5651 |  | FoldChange5661 |  | FoldChange5671 |  | FoldChange5681 |  | FoldChange5691 |  | FoldChange5701 |  | FoldChange5711 |  | FoldChange5721 |  | FoldChange5731 |  | FoldChange5741 |  | FoldChange5751 |  | FoldChange5761 |  | FoldChange5771 |  | FoldChange5781 |  | FoldChange5791 |  | FoldChange5801 |  | FoldChange5811 |  | FoldChange5821 |  | FoldChange5831 |  | FoldChange5841 |  | FoldChange5851 |  | FoldChange5861 |  | FoldChange5871 |  | FoldChange5881 |  | FoldChange5891 |  | FoldChange5901 |  | FoldChange5911 |  | FoldChange5921 |  | FoldChange5931 |  | FoldChange5941 |  | FoldChange5951 |  | FoldChange5961 |  | FoldChange5971 |  | FoldChange5981 |  | FoldChange5991 |  | FoldChange6001 |  | FoldChange6011 |  | FoldChange6021 |  | FoldChange6031 |  | FoldChange6041 |  | FoldChange6051 |  | FoldChange6061 |  | FoldChange6071 |  | FoldChange6081 |  | FoldChange6091 |  | FoldChange6101 |  | FoldChange6111 |  | FoldChange6121 |  | FoldChange6131 |  | FoldChange6141 |  | FoldChange6151 |  | FoldChange6161 |  | FoldChange6171 |  | FoldChange6181 |  | FoldChange6191 |  | FoldChange6201 |  | FoldChange6211 |  | FoldChange6221 |  | FoldChange6231 |  | FoldChange6241 |  | FoldChange6251 |  | FoldChange6261 |  | FoldChange6271 |  | FoldChange6281 |  | FoldChange6291 |  | FoldChange6301 |  | FoldChange6311 |  | FoldChange6321 |  | FoldChange6331 |  | FoldChange6341 |  | FoldChange6351 |  | FoldChange6361 |  | FoldChange6371 |  | FoldChange6381 |  | FoldChange6391 |  | FoldChange6401 |  | FoldChange6411 |  | FoldChange6421 |  | FoldChange6431 |  | FoldChange6441 |  | FoldChange6451 |  | FoldChange6461 |  | FoldChange6471 |  | FoldChange6481 |  | FoldChange6491 |  | FoldChange6501 |  | FoldChange6511 |  | FoldChange6521 |  | FoldChange6531 |  | FoldChange6541 |  | FoldChange6551 |  | FoldChange6561 |  | FoldChange6571 |  | FoldChange6581 |  | FoldChange6591 |  | FoldChange6601 |  | FoldChange6611 |  | FoldChange6621 |  | FoldChange6631 |  | FoldChange6641 |  | FoldChange6651 |  | FoldChange6661 |  | FoldChange6671 |  | FoldChange6681 |  | FoldChange6691 |  | FoldChange6701 |  | FoldChange6711 |  | FoldChange6721 |  | FoldChange6731 |  | FoldChange6741 |  | FoldChange6751 |  | FoldChange6761 |  | FoldChange6771 |  | FoldChange6781 |  | FoldChange6791 |  | FoldChange6801 |  | FoldChange6811 |  | FoldChange6821 |  | FoldChange6831 |  | FoldChange6841 |  | FoldChange6851 |  | FoldChange6861 |  | FoldChange6871 |  | FoldChange6881 |  | FoldChange6891 |  | FoldChange6901 |  | FoldChange6911 |  | FoldChange6921 |  | FoldChange6931 |  | FoldChange6941 |  | FoldChange6951 |  | FoldChange6961 |  | FoldChange6971 |  | FoldChange6981 |  | FoldChange6991 |  | FoldChange7001 |  | FoldChange7011 |  | FoldChange7021 |  | FoldChange7031 |  | FoldChange7041 |  | FoldChange7051 |  | FoldChange7061 |  | FoldChange7071 |  | FoldChange7081 |  | FoldChange7091 |  | FoldChange7101 |  | FoldChange7111 |  | FoldChange7121 |  | FoldChange7131 |  | FoldChange7141 |  | FoldChange7151 |  | FoldChange7161 |  | FoldChange7171 |  | FoldChange7181 |  | FoldChange7191 |  | FoldChange7201 |  | FoldChange7211 |  | FoldChange7221 |  | FoldChange7231 |  | FoldChange7241 |  | FoldChange7251 |  | FoldChange7261 |  | FoldChange7271 |  | FoldChange7281 |  | FoldChange7291 |  | FoldChange7301 |  | FoldChange7311 |  | FoldChange7321 |  | FoldChange7331 |  | FoldChange7341 |  | FoldChange7351 |  | FoldChange7361 |  | FoldChange7371 |  | FoldChange7381 |  | FoldChange7391 |  | FoldChange7401 |  | FoldChange7411 |  | FoldChange7421 |  | FoldChange7431 |  | FoldChange7441 |  | FoldChange7451 |  | FoldChange7461 |  | FoldChange7471 |  | FoldChange7481 |  | FoldChange7491 |  | FoldChange7501 |  | FoldChange7511 |  | FoldChange7521 |  | FoldChange7531 |  | FoldChange7541 |  | FoldChange7551 |  | FoldChange7561 |  | FoldChange7571 |  | FoldChange7581 |  | FoldChange7591 |  | FoldChange7601 |  | FoldChange7611 |  | FoldChange7621 |  | FoldChange7631 |  | FoldChange7641 |  | FoldChange7651 |  | FoldChange7661 |  | FoldChange7671 |  | FoldChange7681 |  | FoldChange7691 |  | FoldChange7701 |  | FoldChange7711 |  | FoldChange7721 |  | FoldChange7731 |  | FoldChange7741 |  | FoldChange7751 |  | FoldChange7761 |  | FoldChange7771 |  | FoldChange7781 |  | FoldChange7791 |  | FoldChange7801 |  | FoldChange7811 |  | FoldChange7821 |  | FoldChange7831 |  | FoldChange7841 |  | FoldChange7851 |  | FoldChange7861 |  | FoldChange7871 |  | FoldChange7881 |  | FoldChange7891 |  | FoldChange7901 |  | FoldChange7911 |  | FoldChange7921 |  | FoldChange7931 |  | FoldChange7941 |  | FoldChange7951 |  | FoldChange7961 |  | FoldChange7971 |  | FoldChange7981 |  | FoldChange7991 |  | FoldChange8001 |  | FoldChange8011 |  | FoldChange8021 |  | FoldChange8031 |  | FoldChange8041 |  | FoldChange8051 |  | FoldChange8061 |  | FoldChange8071 |  | FoldChange8081 |  | FoldChange8091 |  | FoldChange8101 |  | FoldChange8111 |  | FoldChange8121 |  | FoldChange8131 |  | FoldChange8141 |  | FoldChange8151 |  | FoldChange8161 |  | FoldChange8171 |  | FoldChange8181 |  | FoldChange8191 |  | FoldChange8201 |  | FoldChange8211 |  | FoldChange8221 |  | FoldChange8231 |  | FoldChange8241 |  | FoldChange8251 |  | FoldChange8261 |  | FoldChange8271 |  | FoldChange8281 |  | FoldChange8291 |  | FoldChange8301 |  | FoldChange8311 |  | FoldChange8321 |  | FoldChange8331 |  | FoldChange8341 |  | FoldChange8351 |  | FoldChange8361 |  | FoldChange8371 |  | FoldChange8381 |  | FoldChange8391 |  | FoldChange8401 |  | FoldChange8411 |  | FoldChange8421 |  | FoldChange8431 |  | FoldChange8441 |  | FoldChange8451 |  | FoldChange8461 |  | FoldChange8471 |  | FoldChange8481 |  | FoldChange8491 |  | FoldChange8501 |  | FoldChange8511 |  | FoldChange8521 |  | FoldChange8531 |  | FoldChange8541 |  | FoldChange8551 |  | FoldChange8561 |  | FoldChange8571 |  | FoldChange8581 |  | FoldChange8591 |  | FoldChange8601 |  | FoldChange8611 |  | FoldChange8621 |  | FoldChange8631 |  | FoldChange8641 |  | FoldChange8651 |  | FoldChange8661 |  | FoldChange8671 |  | FoldChange8681 |  | FoldChange8691 |  | FoldChange8701 |  | FoldChange8711 |  | FoldChange8721 |  | FoldChange8731 |  | FoldChange8741 |  | FoldChange8751 |  | FoldChange8761 |  | FoldChange8771 |  | FoldChange8781 |  | FoldChange8791 |  | FoldChange8801 |  | FoldChange8811 |  | FoldChange8821 |  | FoldChange8831 |  | FoldChange8841 |  | FoldChange8851 |  | FoldChange8861 |  | FoldChange8871 |  | FoldChange8881 |  | FoldChange8891 |  | FoldChange8901 |  | FoldChange8911 |  | FoldChange8921 |  | FoldChange8931 |  | FoldChange8941 |  | FoldChange8951 |  | FoldChange8961 |  | FoldChange8971 |  | FoldChange8981 |  | FoldChange8991 |  |
|---------|--|---------------|--|---------------|--|---------------|--|---------------|--|---------------|--|---------------|--|---------------|--|---------------|--|---------------|--|---------------|--|---------------|--|---------------|--|---------------|--|---------------|--|---------------|--|---------------|--|---------------|--|---------------|--|---------------|--|---------------|--|---------------|--|---------------|--|---------------|--|---------------|--|---------------|--|---------------|--|---------------|--|---------------|--|---------------|--|---------------|--|---------------|--|---------------|--|---------------|--|---------------|--|---------------|--|---------------|--|---------------|--|---------------|--|---------------|--|---------------|--|---------------|--|---------------|--|---------------|--|---------------|--|---------------|--|---------------|--|---------------|--|---------------|--|---------------|--|---------------|--|---------------|--|---------------|--|---------------|--|---------------|--|---------------|--|---------------|--|---------------|--|---------------|--|---------------|--|---------------|--|---------------|--|---------------|--|---------------|--|---------------|--|---------------|--|---------------|--|---------------|--|---------------|--|---------------|--|---------------|--|---------------|--|---------------|--|---------------|--|---------------|--|---------------|--|---------------|--|---------------|--|---------------|--|---------------|--|---------------|--|---------------|--|---------------|--|---------------|--|---------------|--|---------------|--|---------------|--|---------------|--|---------------|--|---------------|--|---------------|--|----------------|--|----------------|--|----------------|--|----------------|--|----------------|--|----------------|--|----------------|--|----------------|--|----------------|--|----------------|--|----------------|--|----------------|--|----------------|--|----------------|--|----------------|--|----------------|--|----------------|--|----------------|--|----------------|--|----------------|--|----------------|--|----------------|--|----------------|--|----------------|--|----------------|--|----------------|--|----------------|--|----------------|--|----------------|--|----------------|--|----------------|--|----------------|--|----------------|--|----------------|--|----------------|--|----------------|--|----------------|--|----------------|--|----------------|--|----------------|--|----------------|--|----------------|--|----------------|--|----------------|--|----------------|--|----------------|--|----------------|--|----------------|--|----------------|--|----------------|--|----------------|--|----------------|--|----------------|--|----------------|--|----------------|--|----------------|--|----------------|--|----------------|--|----------------|--|----------------|--|----------------|--|----------------|--|----------------|--|----------------|--|----------------|--|----------------|--|----------------|--|----------------|--|----------------|--|----------------|--|----------------|--|----------------|--|----------------|--|----------------|--|----------------|--|----------------|--|----------------|--|----------------|--|----------------|--|----------------|--|----------------|--|----------------|--|----------------|--|----------------|--|----------------|--|----------------|--|----------------|--|----------------|--|----------------|--|----------------|--|----------------|--|----------------|--|----------------|--|----------------|--|----------------|--|----------------|--|----------------|--|----------------|--|----------------|--|----------------|--|----------------|--|----------------|--|----------------|--|----------------|--|----------------|--|----------------|--|----------------|--|----------------|--|----------------|--|----------------|--|----------------|--|----------------|--|----------------|--|----------------|--|----------------|--|----------------|--|----------------|--|----------------|--|----------------|--|----------------|--|----------------|--|----------------|--|----------------|--|----------------|--|----------------|--|----------------|--|----------------|--|----------------|--|----------------|--|----------------|--|----------------|--|----------------|--|----------------|--|----------------|--|----------------|--|----------------|--|----------------|--|----------------|--|----------------|--|----------------|--|----------------|--|----------------|--|----------------|--|----------------|--|----------------|--|----------------|--|----------------|--|----------------|--|----------------|--|----------------|--|----------------|--|----------------|--|----------------|--|----------------|--|----------------|--|----------------|--|----------------|--|----------------|--|----------------|--|----------------|--|----------------|--|----------------|--|----------------|--|----------------|--|----------------|--|----------------|--|----------------|--|----------------|--|----------------|--|----------------|--|----------------|--|----------------|--|----------------|--|----------------|--|----------------|--|----------------|--|----------------|--|----------------|--|----------------|--|----------------|--|----------------|--|----------------|--|----------------|--|----------------|--|----------------|--|----------------|--|----------------|--|----------------|--|----------------|--|----------------|--|----------------|--|----------------|--|----------------|--|----------------|--|----------------|--|----------------|--|----------------|--|----------------|--|----------------|--|----------------|--|----------------|--|----------------|--|----------------|--|----------------|--|----------------|--|----------------|--|----------------|--|----------------|--|----------------|--|----------------|--|----------------|--|----------------|--|----------------|--|----------------|--|----------------|--|----------------|--|----------------|--|----------------|--|----------------|--|----------------|--|----------------|--|----------------|--|----------------|--|----------------|--|----------------|--|----------------|--|----------------|--|----------------|--|----------------|--|----------------|--|----------------|--|----------------|--|----------------|--|----------------|--|----------------|--|----------------|--|----------------|--|----------------|--|----------------|--|----------------|--|----------------|--|----------------|--|----------------|--|----------------|--|----------------|--|----------------|--|----------------|--|----------------|--|----------------|--|----------------|--|----------------|--|----------------|--|----------------|--|----------------|--|----------------|--|----------------|--|----------------|--|----------------|--|----------------|--|----------------|--|----------------|--|----------------|--|----------------|--|----------------|--|----------------|--|----------------|--|----------------|--|----------------|--|----------------|--|----------------|--|----------------|--|----------------|--|----------------|--|----------------|--|----------------|--|----------------|--|----------------|--|----------------|--|----------------|--|----------------|--|----------------|--|----------------|--|----------------|--|----------------|--|----------------|--|----------------|--|----------------|--|----------------|--|----------------|--|----------------|--|----------------|--|----------------|--|----------------|--|----------------|--|----------------|--|----------------|--|----------------|--|----------------|--|----------------|--|----------------|--|----------------|--|----------------|--|----------------|--|----------------|--|----------------|--|----------------|--|----------------|--|----------------|--|----------------|--|----------------|--|----------------|--|----------------|--|----------------|--|----------------|--|----------------|--|----------------|--|----------------|--|----------------|--|----------------|--|----------------|--|----------------|--|----------------|--|----------------|--|----------------|--|----------------|--|----------------|--|----------------|--|----------------|--|----------------|--|----------------|--|----------------|--|----------------|--|----------------|--|----------------|--|----------------|--|----------------|--|----------------|--|----------------|--|----------------|--|----------------|--|----------------|--|----------------|--|----------------|--|----------------|--|----------------|--|----------------|--|----------------|--|----------------|--|----------------|--|----------------|--|----------------|--|----------------|--|----------------|--|----------------|--|----------------|--|----------------|--|----------------|--|----------------|--|----------------|--|----------------|--|----------------|--|----------------|--|----------------|--|----------------|--|----------------|--|----------------|--|----------------|--|----------------|--|----------------|--|----------------|--|----------------|--|----------------|--|----------------|--|----------------|--|----------------|--|----------------|--|----------------|--|----------------|--|----------------|--|----------------|--|----------------|--|----------------|--|----------------|--|----------------|--|----------------|--|----------------|--|----------------|--|----------------|--|----------------|--|----------------|--|----------------|--|----------------|--|----------------|--|----------------|--|----------------|--|----------------|--|----------------|--|----------------|--|----------------|--|----------------|--|----------------|--|----------------|--|----------------|--|----------------|--|----------------|--|----------------|--|----------------|--|----------------|--|----------------|--|----------------|--|----------------|--|----------------|--|----------------|--|----------------|--|----------------|--|----------------|--|----------------|--|----------------|--|----------------|--|----------------|--|----------------|--|----------------|--|----------------|--|----------------|--|----------------|--|----------------|--|----------------|--|----------------|--|----------------|--|----------------|--|----------------|--|----------------|--|----------------|--|----------------|--|----------------|--|----------------|--|----------------|--|----------------|--|----------------|--|----------------|--|----------------|--|----------------|--|----------------|--|----------------|--|----------------|--|----------------|--|----------------|--|----------------|--|----------------|--|----------------|--|----------------|--|----------------|--|----------------|--|----------------|--|----------------|--|----------------|--|----------------|--|----------------|--|----------------|--|----------------|--|----------------|--|----------------|--|----------------|--|----------------|--|----------------|--|----------------|--|----------------|--|----------------|--|----------------|--|----------------|--|----------------|--|----------------|--|----------------|--|----------------|--|----------------|--|----------------|--|----------------|--|----------------|--|----------------|--|----------------|--|----------------|--|----------------|--|----------------|--|----------------|--|----------------|--|----------------|--|----------------|--|----------------|--|----------------|--|----------------|--|----------------|--|----------------|--|----------------|--|----------------|--|----------------|--|----------------|--|----------------|--|----------------|--|----------------|--|----------------|--|----------------|--|----------------|--|----------------|--|----------------|--|----------------|--|----------------|--|----------------|--|----------------|--|----------------|--|----------------|--|----------------|--|----------------|--|----------------|--|----------------|--|----------------|--|----------------|--|----------------|--|----------------|--|----------------|--|----------------|--|----------------|--|----------------|--|----------------|--|----------------|--|----------------|--|----------------|--|----------------|--|----------------|--|----------------|--|----------------|--|----------------|--|----------------|--|----------------|--|----------------|--|----------------|--|----------------|--|----------------|--|----------------|--|----------------|--|----------------|--|----------------|--|----------------|--|----------------|--|----------------|--|----------------|--|----------------|--|----------------|--|----------------|--|----------------|--|----------------|--|----------------|--|----------------|--|----------------|--|----------------|--|----------------|--|----------------|--|----------------|--|----------------|--|----------------|--|----------------|--|----------------|--|----------------|--|----------------|--|----------------|--|----------------|--|----------------|--|----------------|--|----------------|--|----------------|--|----------------|--|----------------|--|----------------|--|----------------|--|----------------|--|----------------|--|----------------|--|----------------|--|----------------|--|----------------|--|----------------|--|----------------|--|----------------|--|----------------|--|----------------|--|----------------|--|----------------|--|----------------|--|----------------|--|----------------|--|----------------|--|----------------|--|----------------|--|----------------|--|----------------|--|----------------|--|----------------|--|----------------|--|----------------|--|----------------|--|----------------|--|----------------|--|----------------|--|----------------|--|----------------|--|----------------|--|----------------|--|----------------|--|----------------|--|----------------|--|----------------|--|----------------|--|----------------|--|----------------|--|----------------|--|----------------|--|----------------|--|----------------|--|----------------|--|----------------|--|----------------|--|----------------|--|----------------|--|----------------|--|----------------|--|----------------|--|----------------|--|----------------|--|----------------|--|----------------|--|----------------|--|----------------|--|----------------|--|----------------|--|----------------|--|----------------|--|----------------|--|----------------|--|----------------|--|----------------|--|----------------|--|----------------|--|----------------|--|----------------|--|----------------|--|----------------|--|----------------|--|----------------|--|----------------|--|----------------|--|----------------|--|----------------|--|----------------|--|----------------|--|----------------|--|----------------|--|----------------|--|----------------|--|----------------|--|----------------|--|----------------|--|----------------|--|----------------|--|----------------|--|----------------|--|----------------|--|----------------|--|----------------|--|----------------|--|----------------|--|----------------|--|----------------|--|----------------|--|----------------|--|----------------|--|----------------|--|----------------|--|----------------|--|----------------|--|----------------|--|----------------|--|----------------|--|----------------|--|----------------|--|----------------|--|----------------|--|----------------|--|----------------|--|----------------|--|----------------|--|----------------|--|----------------|--|----------------|--|----------------|--|----------------|--|----------------|--|----------------|--|----------------|--|----------------|--|----------------|--|----------------|--|----------------|--|----------------|--|----------------|--|----------------|--|----------------|--|----------------|--|----------------|--|----------------|--|----------------|--|----------------|--|----------------|--|----------------|--|----------------|--|----------------|--|----------------|--|----------------|--|----------------|--|----------------|--|----------------|--|----------------|--|----------------|--|----------------|--|----------------|--|----------------|--|----------------|--|----------------|--|----------------|--|----------------|--|----------------|--|----------------|--|----------------|--|----------------|--|----------------|--|----------------|--|----------------|--|----------------|--|----------------|--|----------------|--|----------------|--|----------------|--|----------------|--|----------------|--|----------------|--|----------------|--|----------------|--|----------------|--|----------------|--|----------------|--|----------------|--|----------------|--|----------------|--|----------------|--|----------------|--|----------------|--|----------------|--|----------------|--|----------------|--|----------------|--|----------------|--|----------------|--|----------------|--|----------------|--|----------------|--|----------------|--|----------------|--|----------------|--|----------------|--|----------------|--|----------------|--|----------------|--|----------------|--|----------------|--|----------------|--|----------------|--|----------------|--|----------------|--|----------------|--|----------------|--|----------------|--|----------------|--|----------------|--|----------------|--|----------------|--|----------------|--|----------------|--|----------------|--|----------------|--|----------------|--|----------------|--|----------------|--|----------------|--|----------------|--|----------------|--|----------------|--|----------------|--|----------------|--|----------------|--|----------------|--|----------------|--|----------------|--|
|---------|--|---------------|--|---------------|--|---------------|--|---------------|--|---------------|--|---------------|--|---------------|--|---------------|--|---------------|--|---------------|--|---------------|--|---------------|--|---------------|--|---------------|--|---------------|--|---------------|--|---------------|--|---------------|--|---------------|--|---------------|--|---------------|--|---------------|--|---------------|--|---------------|--|---------------|--|---------------|--|---------------|--|---------------|--|---------------|--|---------------|--|---------------|--|---------------|--|---------------|--|---------------|--|---------------|--|---------------|--|---------------|--|---------------|--|---------------|--|---------------|--|---------------|--|---------------|--|---------------|--|---------------|--|---------------|--|---------------|--|---------------|--|---------------|--|---------------|--|---------------|--|---------------|--|---------------|--|---------------|--|---------------|--|---------------|--|---------------|--|---------------|--|---------------|--|---------------|--|---------------|--|---------------|--|---------------|--|---------------|--|---------------|--|---------------|--|---------------|--|---------------|--|---------------|--|---------------|--|---------------|--|---------------|--|---------------|--|---------------|--|---------------|--|---------------|--|---------------|--|---------------|--|---------------|--|---------------|--|---------------|--|---------------|--|---------------|--|---------------|--|---------------|--|---------------|--|---------------|--|---------------|--|---------------|--|---------------|--|---------------|--|----------------|--|----------------|--|----------------|--|----------------|--|----------------|--|----------------|--|----------------|--|----------------|--|----------------|--|----------------|--|----------------|--|----------------|--|----------------|--|----------------|--|----------------|--|----------------|--|----------------|--|----------------|--|----------------|--|----------------|--|----------------|--|----------------|--|----------------|--|----------------|--|----------------|--|----------------|--|----------------|--|----------------|--|----------------|--|----------------|--|----------------|--|----------------|--|----------------|--|----------------|--|----------------|--|----------------|--|----------------|--|----------------|--|----------------|--|----------------|--|----------------|--|----------------|--|----------------|--|----------------|--|----------------|--|----------------|--|----------------|--|----------------|--|----------------|--|----------------|--|----------------|--|----------------|--|----------------|--|----------------|--|----------------|--|----------------|--|----------------|--|----------------|--|----------------|--|----------------|--|----------------|--|----------------|--|----------------|--|----------------|--|----------------|--|----------------|--|----------------|--|----------------|--|----------------|--|----------------|--|----------------|--|----------------|--|----------------|--|----------------|--|----------------|--|----------------|--|----------------|--|----------------|--|----------------|--|----------------|--|----------------|--|----------------|--|----------------|--|----------------|--|----------------|--|----------------|--|----------------|--|----------------|--|----------------|--|----------------|--|----------------|--|----------------|--|----------------|--|----------------|--|----------------|--|----------------|--|----------------|--|----------------|--|----------------|--|----------------|--|----------------|--|----------------|--|----------------|--|----------------|--|----------------|--|----------------|--|----------------|--|----------------|--|----------------|--|----------------|--|----------------|--|----------------|--|----------------|--|----------------|--|----------------|--|----------------|--|----------------|--|----------------|--|----------------|--|----------------|--|----------------|--|----------------|--|----------------|--|----------------|--|----------------|--|----------------|--|----------------|--|----------------|--|----------------|--|----------------|--|----------------|--|----------------|--|----------------|--|----------------|--|----------------|--|----------------|--|----------------|--|----------------|--|----------------|--|----------------|--|----------------|--|----------------|--|----------------|--|----------------|--|----------------|--|----------------|--|----------------|--|----------------|--|----------------|--|----------------|--|----------------|--|----------------|--|----------------|--|----------------|--|----------------|--|----------------|--|----------------|--|----------------|--|----------------|--|----------------|--|----------------|--|----------------|--|----------------|--|----------------|--|----------------|--|----------------|--|----------------|--|----------------|--|----------------|--|----------------|--|----------------|--|----------------|--|----------------|--|----------------|--|----------------|--|----------------|--|----------------|--|----------------|--|----------------|--|----------------|--|----------------|--|----------------|--|----------------|--|----------------|--|----------------|--|----------------|--|----------------|--|----------------|--|----------------|--|----------------|--|----------------|--|----------------|--|----------------|--|----------------|--|----------------|--|----------------|--|----------------|--|----------------|--|----------------|--|----------------|--|----------------|--|----------------|--|----------------|--|----------------|--|----------------|--|----------------|--|----------------|--|----------------|--|----------------|--|----------------|--|----------------|--|----------------|--|----------------|--|----------------|--|----------------|--|----------------|--|----------------|--|----------------|--|----------------|--|----------------|--|----------------|--|----------------|--|----------------|--|----------------|--|----------------|--|----------------|--|----------------|--|----------------|--|----------------|--|----------------|--|----------------|--|----------------|--|----------------|--|----------------|--|----------------|--|----------------|--|----------------|--|----------------|--|----------------|--|----------------|--|----------------|--|----------------|--|----------------|--|----------------|--|----------------|--|----------------|--|----------------|--|----------------|--|----------------|--|----------------|--|----------------|--|----------------|--|----------------|--|----------------|--|----------------|--|----------------|--|----------------|--|----------------|--|----------------|--|----------------|--|----------------|--|----------------|--|----------------|--|----------------|--|----------------|--|----------------|--|----------------|--|----------------|--|----------------|--|----------------|--|----------------|--|----------------|--|----------------|--|----------------|--|----------------|--|----------------|--|----------------|--|----------------|--|----------------|--|----------------|--|----------------|--|----------------|--|----------------|--|----------------|--|----------------|--|----------------|--|----------------|--|----------------|--|----------------|--|----------------|--|----------------|--|----------------|--|----------------|--|----------------|--|----------------|--|----------------|--|----------------|--|----------------|--|----------------|--|----------------|--|----------------|--|----------------|--|----------------|--|----------------|--|----------------|--|----------------|--|----------------|--|----------------|--|----------------|--|----------------|--|----------------|--|----------------|--|----------------|--|----------------|--|----------------|--|----------------|--|----------------|--|----------------|--|----------------|--|----------------|--|----------------|--|----------------|--|----------------|--|----------------|--|----------------|--|----------------|--|----------------|--|----------------|--|----------------|--|----------------|--|----------------|--|----------------|--|----------------|--|----------------|--|----------------|--|----------------|--|----------------|--|----------------|--|----------------|--|----------------|--|----------------|--|----------------|--|----------------|--|----------------|--|----------------|--|----------------|--|----------------|--|----------------|--|----------------|--|----------------|--|----------------|--|----------------|--|----------------|--|----------------|--|----------------|--|----------------|--|----------------|--|----------------|--|----------------|--|----------------|--|----------------|--|----------------|--|----------------|--|----------------|--|----------------|--|----------------|--|----------------|--|----------------|--|----------------|--|----------------|--|----------------|--|----------------|--|----------------|--|----------------|--|----------------|--|----------------|--|----------------|--|----------------|--|----------------|--|----------------|--|----------------|--|----------------|--|----------------|--|----------------|--|----------------|--|----------------|--|----------------|--|----------------|--|----------------|--|----------------|--|----------------|--|----------------|--|----------------|--|----------------|--|----------------|--|----------------|--|----------------|--|----------------|--|----------------|--|----------------|--|----------------|--|----------------|--|----------------|--|----------------|--|----------------|--|----------------|--|----------------|--|----------------|--|----------------|--|----------------|--|----------------|--|----------------|--|----------------|--|----------------|--|----------------|--|----------------|--|----------------|--|----------------|--|----------------|--|----------------|--|----------------|--|----------------|--|----------------|--|----------------|--|----------------|--|----------------|--|----------------|--|----------------|--|----------------|--|----------------|--|----------------|--|----------------|--|----------------|--|----------------|--|----------------|--|----------------|--|----------------|--|----------------|--|----------------|--|----------------|--|----------------|--|----------------|--|----------------|--|----------------|--|----------------|--|----------------|--|----------------|--|----------------|--|----------------|--|----------------|--|----------------|--|----------------|--|----------------|--|----------------|--|----------------|--|----------------|--|----------------|--|----------------|--|----------------|--|----------------|--|----------------|--|----------------|--|----------------|--|----------------|--|----------------|--|----------------|--|----------------|--|----------------|--|----------------|--|----------------|--|----------------|--|----------------|--|----------------|--|----------------|--|----------------|--|----------------|--|----------------|--|----------------|--|----------------|--|----------------|--|----------------|--|----------------|--|----------------|--|----------------|--|----------------|--|----------------|--|----------------|--|----------------|--|----------------|--|----------------|--|----------------|--|----------------|--|----------------|--|----------------|--|----------------|--|----------------|--|----------------|--|----------------|--|----------------|--|----------------|--|----------------|--|----------------|--|----------------|--|----------------|--|----------------|--|----------------|--|----------------|--|----------------|--|----------------|--|----------------|--|----------------|--|----------------|--|----------------|--|----------------|--|----------------|--|----------------|--|----------------|--|----------------|--|----------------|--|----------------|--|----------------|--|----------------|--|----------------|--|----------------|--|----------------|--|----------------|--|----------------|--|----------------|--|----------------|--|----------------|--|----------------|--|----------------|--|----------------|--|----------------|--|----------------|--|----------------|--|----------------|--|----------------|--|----------------|--|----------------|--|----------------|--|----------------|--|----------------|--|----------------|--|----------------|--|----------------|--|----------------|--|----------------|--|----------------|--|----------------|--|----------------|--|----------------|--|----------------|--|----------------|--|----------------|--|----------------|--|----------------|--|----------------|--|----------------|--|----------------|--|----------------|--|----------------|--|----------------|--|----------------|--|----------------|--|----------------|--|----------------|--|----------------|--|----------------|--|----------------|--|----------------|--|----------------|--|----------------|--|----------------|--|----------------|--|----------------|--|----------------|--|----------------|--|----------------|--|----------------|--|----------------|--|----------------|--|----------------|--|----------------|--|----------------|--|----------------|--|----------------|--|----------------|--|----------------|--|----------------|--|----------------|--|----------------|--|----------------|--|----------------|--|----------------|--|----------------|--|----------------|--|----------------|--|----------------|--|----------------|--|----------------|--|----------------|--|----------------|--|----------------|--|----------------|--|----------------|--|----------------|--|----------------|--|----------------|--|----------------|--|----------------|--|----------------|--|----------------|--|----------------|--|----------------|--|----------------|--|----------------|--|----------------|--|----------------|--|----------------|--|----------------|--|----------------|--|----------------|--|----------------|--|----------------|--|----------------|--|----------------|--|----------------|--|----------------|--|----------------|--|----------------|--|----------------|--|----------------|--|----------------|--|----------------|--|----------------|--|----------------|--|----------------|--|----------------|--|----------------|--|----------------|--|----------------|--|----------------|--|----------------|--|----------------|--|----------------|--|----------------|--|----------------|--|----------------|--|----------------|--|----------------|--|----------------|--|----------------|--|----------------|--|----------------|--|----------------|--|----------------|--|----------------|--|----------------|--|----------------|--|----------------|--|----------------|--|----------------|--|----------------|--|----------------|--|----------------|--|----------------|--|----------------|--|----------------|--|----------------|--|----------------|--|----------------|--|----------------|--|----------------|--|----------------|--|----------------|--|----------------|--|----------------|--|----------------|--|----------------|--|----------------|--|----------------|--|----------------|--|----------------|--|----------------|--|----------------|--|----------------|--|----------------|--|----------------|--|----------------|--|----------------|--|----------------|--|----------------|--|----------------|--|----------------|--|----------------|--|----------------|--|----------------|--|----------------|--|----------------|--|----------------|--|----------------|--|----------------|--|----------------|--|----------------|--|----------------|--|----------------|--|----------------|--|----------------|--|----------------|--|----------------|--|----------------|--|----------------|--|----------------|--|----------------|--|----------------|--|----------------|--|----------------|--|----------------|--|----------------|--|----------------|--|----------------|--|----------------|--|----------------|--|----------------|--|----------------|--|----------------|--|----------------|--|----------------|--|----------------|--|----------------|--|----------------|--|----------------|--|----------------|--|----------------|--|----------------|--|----------------|--|----------------|--|----------------|--|----------------|--|----------------|--|----------------|--|----------------|--|----------------|--|----------------|--|----------------|--|----------------|--|----------------|--|----------------|--|----------------|--|----------------|--|----------------|--|----------------|--|----------------|--|----------------|--|----------------|--|----------------|--|----------------|--|----------------|--|----------------|--|----------------|--|----------------|--|----------------|--|----------------|--|----------------|--|----------------|--|----------------|--|----------------|--|----------------|--|----------------|--|----------------|--|----------------|--|----------------|--|----------------|--|----------------|--|----------------|--|----------------|--|----------------|--|----------------|--|----------------|--|----------------|--|----------------|--|----------------|--|----------------|--|----------------|--|----------------|--|----------------|--|----------------|--|----------------|--|----------------|--|----------------|--|----------------|--|----------------|--|----------------|--|----------------|--|----------------|--|----------------|--|----------------|--|----------------|--|----------------|--|

**Title:** Comparative Multidimensional Molecular Analyses of Pediatric Diffuse Intrinsic Pontine Glioma Reveals Distinct Molecular Subtypes  
**Journal:** *Acta Neuropathologica*

Javad Nazarian, Children's National Medical Center, Center for Genetic Medicine

Phone: 202-476-6022 Fax: 202-476-6014  
Email: [DMcGowan@CMAA.org](mailto:DMcGowan@CMAA.org)

| n: | FoldChange/10 | n: | FoldChange/111 | n: | FoldChange/111 |
|----|---------------|----|----------------|----|----------------|
| 1  | 1.00          | 1  | 1.00           | 1  | 1.00           |
| 2  | 1.00          | 2  | 1.00           | 2  | 1.00           |
| 3  | 1.00          | 3  | 1.00           | 3  | 1.00           |
| 4  | 1.00          | 4  | 1.00           | 4  | 1.00           |
| 5  | 1.00          | 5  | 1.00           | 5  | 1.00           |
| 6  | 1.00          | 6  | 1.00           | 6  | 1.00           |
| 7  | 1.00          | 7  | 1.00           | 7  | 1.00           |
| 8  | 1.00          | 8  | 1.00           | 8  | 1.00           |
| 9  | 1.00          | 9  | 1.00           | 9  | 1.00           |
| 10 | 1.00          | 10 | 1.00           | 10 | 1.00           |
| 11 | 1.00          | 11 | 1.00           | 11 | 1.00           |
| 12 | 1.00          | 12 | 1.00           | 12 | 1.00           |
| 13 | 1.00          | 13 | 1.00           | 13 | 1.00           |
| 14 | 1.00          | 14 | 1.00           | 14 | 1.00           |
| 15 | 1.00          | 15 | 1.00           | 15 | 1.00           |
| 16 | 1.00          | 16 | 1.00           | 16 | 1.00           |
| 17 | 1.00          | 17 | 1.00           | 17 | 1.00           |
| 18 | 1.00          | 18 | 1.00           | 18 | 1.00           |
| 19 | 1.00          | 19 | 1.00           | 19 | 1.00           |
| 20 | 1.00          | 20 | 1.00           | 20 | 1.00           |
| 21 | 1.00          | 21 | 1.00           | 21 | 1.00           |
| 22 | 1.00          | 22 | 1.00           | 22 | 1.00           |
| 23 | 1.00          | 23 | 1.00           | 23 | 1.00           |
| 24 | 1.00          | 24 | 1.00           | 24 | 1.00           |
| 25 | 1.00          | 25 | 1.00           | 25 | 1.00           |
| 26 | 1.00          | 26 | 1.00           | 26 | 1.00           |
| 27 | 1.00          | 27 | 1.00           | 27 | 1.00           |
| 28 | 1.00          | 28 | 1.00           | 28 | 1.00           |
| 29 | 1.00          | 29 | 1.00           | 29 | 1.00           |
| 30 | 1.00          | 30 | 1.00           | 30 | 1.00           |
| 31 | 1.00          | 31 | 1.00           | 31 | 1.00           |
| 32 | 1.00          | 32 | 1.00           | 32 | 1.00           |
| 33 | 1.00          | 33 | 1.00           | 33 | 1.00           |
| 34 | 1.00          | 34 | 1.00           | 34 | 1.00           |
| 35 | 1.00          | 35 | 1.00           | 35 | 1.00           |
| 36 | 1.00          | 36 | 1.00           | 36 | 1.00           |
| 37 | 1.00          | 37 | 1.00           | 37 | 1.00           |
| 38 | 1.00          | 38 | 1.00           | 38 | 1.00           |
| 39 | 1.00          | 39 | 1.00           | 39 | 1.00           |
| 40 | 1.00          | 40 | 1.00           | 40 | 1.00           |
| 41 | 1.00          | 41 | 1.00           | 41 | 1.00           |
| 42 | 1.00          | 42 | 1.00           | 42 | 1.00           |
| 43 | 1.00          | 43 | 1.00           | 43 | 1.00           |
| 44 | 1.00          | 44 | 1.00           | 44 | 1.00           |
| 45 | 1.00          | 45 | 1.00           | 45 | 1.00           |
| 46 | 1.00          | 46 | 1.00           | 46 | 1.00           |
| 47 | 1.00          | 47 | 1.00           | 47 | 1.00           |
| 48 | 1.00          | 48 | 1.00           | 48 | 1.00           |
| 49 | 1.00          | 49 | 1.00           | 49 | 1.00           |
| 50 | 1.00          | 50 | 1.00           | 50 | 1.00           |
| 51 | 1.00          | 51 | 1.00           | 51 | 1.00           |
| 52 | 1.00          | 52 | 1.00           | 52 | 1.00           |
| 53 | 1.00          | 53 | 1.00           | 53 | 1.00           |
| 54 | 1.00          | 54 | 1.00           | 54 | 1.00           |
| 55 | 1.00          | 55 | 1.00           | 55 | 1.00           |
| 56 | 1.00          | 56 | 1.00           | 56 | 1.00           |
| 57 | 1.00          | 57 | 1.00           | 57 | 1.00           |
| 58 | 1.00          | 58 | 1.00           | 58 | 1.00           |
| 59 | 1.00          | 59 | 1.00           | 59 | 1.00           |
| 60 | 1.00          | 60 | 1.00           | 60 | 1.00           |
| 61 | 1.00          | 61 | 1.00           | 61 | 1.00           |
| 62 | 1.00          | 62 | 1.00           | 62 | 1.00           |
| 63 | 1.00          | 63 | 1.00           | 63 | 1.00           |
| 64 | 1.00          | 64 | 1.00           | 64 | 1.00           |
| 65 | 1.00          | 65 | 1.00           | 65 | 1.00           |
| 66 | 1.00          | 66 | 1.00           | 66 | 1.00           |
| 67 | 1.00          |    |                |    |                |



File: ISM\_10 (Online Resource 10)

Figure: Comparative Multidimensional Molecular Analyses of Pediatric Diffuse Intrinsic Glioma Reveals Distinct Subtypes  
Journal: Acta Neurochirurgica

Authors: Amanda M. Stransik, Madhuri Kumbhakar, Kendall Sydnor, Sidicki Yavuzli, Joe Devenney, Brennan Harmon, Jordan Hall, Eric H. Rubie, Ping An, Melanie Weingart, Brian Reid, Sarah Magge, Roger J. Packer, Javad Nazarian

Corresponding Author:

Javad Nazarian, Children's National Medical Center, Center for Genetic Medicine  
111 Michigan Ave., NW, Washington DC, 20010  
Phone: 202-476-6022 Fax: 202-476-6014  
Email: J.Nazarian@CNMC.org

| Gene ID | p-value | FolChang106 |  |  | FolChang110 |  |  | FolChang111 |  |  | FolChang112 |  |  | FolChang121 |  |  | FolChang122 |  |  | FolChang137 |  |  | FolChang138 |  |  | FolChang153 |  |  | FolChang157 |  |  | FolChang158 |  |  | FolChang159 |  |  | FolChang160 |  |  | FolChang161 |  |  | FolChang162 |  |  | FolChang163 |  |  | FolChang164 |  |  | FolChang165 |  |  | FolChang166 |  |  | FolChang167 |  |  | FolChang168 |  |  | FolChang169 |  |  | FolChang170 |  |  | FolChang171 |  |  | FolChang172 |  |  | FolChang173 |  |  | FolChang174 |  |  | FolChang175 |  |  | FolChang176 |  |  | FolChang177 |  |  | FolChang178 |  |  | FolChang179 |  |  | FolChang180 |  |  | FolChang181 |  |  | FolChang182 |  |  | FolChang183 |  |  | FolChang184 |  |  | FolChang185 |  |  | FolChang186 |  |  | FolChang187 |  |  | FolChang188 |  |  | FolChang189 |  |  | FolChang190 |  |  | FolChang191 |  |  | FolChang192 |  |  | FolChang193 |  |  | FolChang194 |  |  | FolChang195 |  |  | FolChang196 |  |  | FolChang197 |  |  | FolChang198 |  |  | FolChang199 |  |  | FolChang200 |  |  | FolChang201 |  |  | FolChang202 |  |  | FolChang203 |  |  | FolChang204 |  |  | FolChang205 |  |  | FolChang206 |  |  | FolChang207 |  |  | FolChang208 |  |  | FolChang209 |  |  | FolChang210 |  |  | FolChang211 |  |  | FolChang212 |  |  | FolChang213 |  |  | FolChang214 |  |  | FolChang215 |  |  | FolChang216 |  |  | FolChang217 |  |  | FolChang218 |  |  | FolChang219 |  |  | FolChang220 |  |  | FolChang221 |  |  | FolChang222 |  |  | FolChang223 |  |  | FolChang224 |  |  | FolChang225 |  |  | FolChang226 |  |  | FolChang227 |  |  | FolChang228 |  |  | FolChang229 |  |  | FolChang230 |  |  | FolChang231 |  |  | FolChang232 |  |  | FolChang233 |  |  | FolChang234 |  |  | FolChang235 |  |  | FolChang236 |  |  | FolChang237 |  |  | FolChang238 |  |  | FolChang239 |  |  | FolChang240 |  |  | FolChang241 |  |  | FolChang242 |  |  | FolChang243 |  |  | FolChang244 |  |  | FolChang245 |  |  | FolChang246 |  |  | FolChang247 |  |  | FolChang248 |  |  | FolChang249 |  |  | FolChang250 |  |  | FolChang251 |  |  | FolChang252 |  |  | FolChang253 |  |  | FolChang254 |  |  | FolChang255 |  |  | FolChang256 |  |  | FolChang257 |  |  | FolChang258 |  |  | FolChang259 |  |  | FolChang260 |  |  | FolChang261 |  |  | FolChang262 |  |  | FolChang263 |  |  | FolChang264 |  |  | FolChang265 |  |  | FolChang266 |  |  | FolChang267 |  |  | FolChang268 |  |  | FolChang269 |  |  | FolChang270 |  |  | FolChang271 |  |  | FolChang272 |  |  | FolChang273 |  |  | FolChang274 |  |  | FolChang275 |  |  | FolChang276 |  |  | FolChang277 |  |  | FolChang278 |  |  | FolChang279 |  |  | FolChang280 |  |  | FolChang281 |  |  | FolChang282 |  |  | FolChang283 |  |  | FolChang284 |  |  | FolChang285 |  |  | FolChang286 |  |  | FolChang287 |  |  | FolChang288 |  |  | FolChang289 |  |  | FolChang290 |  |  | FolChang291 |  |  | FolChang292 |  |  | FolChang293 |  |  | FolChang294 |  |  | FolChang295 |  |  | FolChang296 |  |  | FolChang297 |  |  | FolChang298 |  |  | FolChang299 |  |  | FolChang300 |  |  | FolChang301 |  |  | FolChang302 |  |  | FolChang303 |  |  | FolChang304 |  |  | FolChang305 |  |  | FolChang306 |  |  | FolChang307 |  |  | FolChang308 |  |  | FolChang309 |  |  | FolChang310 |  |  | FolChang311 |  |  | FolChang312 |  |  | FolChang313 |  |  | FolChang314 |  |  | FolChang315 |  |  | FolChang316 |  |  | FolChang317 |  |  | FolChang318 |  |  | FolChang319 |  |  | FolChang320 |  |  | FolChang321 |  |  | FolChang322 |  |  | FolChang323 |  |  | FolChang324 |  |  | FolChang325 |  |  | FolChang326 |  |  | FolChang327 |  |  | FolChang328 |  |  | FolChang329 |  |  | FolChang330 |  |  | FolChang331 |  |  | FolChang332 |  |  | FolChang333 |  |  | FolChang334 |  |  | FolChang335 |  |  | FolChang336 |  |  | FolChang337 |  |  | FolChang338 |  |  | FolChang339 |  |  | FolChang340 |  |  | FolChang341 |  |  | FolChang342 |  |  | FolChang343 |  |  | FolChang344 |  |  | FolChang345 |  |  | FolChang346 |  |  | FolChang347 |  |  | FolChang348 |  |  | FolChang349 |  |  | FolChang350 |  |  | FolChang351 |  |  | FolChang352 |  |  | FolChang353 |  |  | FolChang354 |  |  | FolChang355 |  |  | FolChang356 |  |  | FolChang357 |  |  | FolChang358 |  |  | FolChang359 |  |  | FolChang360 |  |  | FolChang361 |  |  | FolChang362 |  |  | FolChang363 |  |  | FolChang364 |  |  | FolChang365 |  |  | FolChang366 |  |  | FolChang367 |  |  | FolChang368 |  |  | FolChang369 |  |  | FolChang370 |  |  | FolChang371 |  |  | FolChang372 |  |  | FolChang373 |  |  | FolChang374 |  |  | FolChang375 |  |  | FolChang376 |  |  | FolChang377 |  |  | FolChang378 |  |  | FolChang379 |  |  | FolChang380 |  |  | FolChang381 |  |  | FolChang382 |  |  | FolChang383 |  |  | FolChang384 |  |  | FolChang385 |  |  | FolChang386 |  |  | FolChang387 |  |  | FolChang388 |  |  | FolChang389 |  |  | FolChang390 |  |  | FolChang391 |  |  | FolChang392 |  |  | FolChang393 |  |  | FolChang394 |  |  | FolChang395 |  |  | FolChang396 |  |  | FolChang397 |  |  | FolChang398 |  |  | FolChang399 |  |  | FolChang400 |  |  | FolChang401 |  |  | FolChang402 |  |  | FolChang403 |  |  | FolChang404 |  |  | FolChang405 |  |  | FolChang406 |  |  | FolChang407 |  |  | FolChang408 |  |  | FolChang409 |  |  | FolChang410 |  |  | FolChang411 |  |  | FolChang412 |  |  | FolChang413 |  |  | FolChang414 |  |  | FolChang415 |  |  | FolChang416 |  |  | FolChang417 |  |  | FolChang418 |  |  | FolChang419 |  |  | FolChang420 |  |  | FolChang421 |  |  | FolChang422 |  |  | FolChang423 |  |  | FolChang424 |  |  | FolChang425 |  |  | FolChang426 |  |  | FolChang427 |  |  | FolChang428 |  |  | FolChang429 |  |  | FolChang430 |  |  | FolChang431 |  |  | FolChang432 |  |  | FolChang433 |  |  | FolChang434 |  |  | FolChang435 |  |  | FolChang436 |  |  | FolChang437 |  |  | FolChang438 |  |  | FolChang439 |  |  | FolChang440 |  |  | FolChang441 |  |  | FolChang442 |  |  | FolChang443 |  |  | FolChang444 |  |  | FolChang445 |  |  | FolChang446 |  |  | FolChang447 |  |  | FolChang448 |  |  | FolChang449 |  |  | FolChang450 |  |  | FolChang451 |  |  | FolChang452 |  |  | FolChang453 |  |  | FolChang454 |  |  | FolChang455 |  |  | FolChang456 |  |  | FolChang457 |  |  | FolChang458 |  |  | FolChang459 |  |  | FolChang460 |  |  | FolChang461 |  |  | FolChang462 |  |  | FolChang463 |  |  | FolChang464 |  |  | FolChang465 |  |  | FolChang466 |  |  | FolChang467 |  |  | FolChang468 |  |  | FolChang469 |  |  | FolChang470 |  |  | FolChang471 |  |  | FolChang472 |  |  | FolChang473 |  |  | FolChang474 |  |  | FolChang475 |  |  | FolChang476 |  |  | FolChang477 |  |  | FolChang478 |  |  | FolChang479 |  |  | FolChang480 |  |  | FolChang481 |  |  | FolChang482 |  |  | FolChang483 |  |  | FolChang484 |  |  | FolChang485 |  |  | FolChang486 |  |  | FolChang487 |  |  | FolChang488 |  |  | FolChang489 |  |  | FolChang490 |  |  | FolChang491 |  |  | FolChang492 |  |  | FolChang493 |  |  | FolChang494 |  |  | FolChang495 |  |  | FolChang496 |  |  | FolChang497 |  |  | FolChang498 |  |  | FolChang499 |  |  | FolChang500 |  |  | FolChang501 |  |  | FolChang502 |  |  | FolChang503 |  |  | FolChang504 |  |  | FolChang505 |  |  | FolChang506 |  |  | FolChang507 |  |  | FolChang508 |  |  | FolChang509 |  |  | FolChang510 |  |  | FolChang511 |  |  | FolChang512 |  |  | FolChang513 |  |  | FolChang514 |  |  | FolChang515 |  |  | FolChang516 |  |  | FolChang517 |  |  | FolChang518 |  |  | FolChang519 |  |  | FolChang520 |  |  | FolChang521 |  |  | FolChang522 |  |  | FolChang523 |  |  | FolChang524 |  |  | FolChang525 |  |  | FolChang526 |  |  | FolChang527 |  |  | FolChang528 |  |  | FolChang529 |  |  | FolChang530 |  |  | FolChang531 |  |  | FolChang532 |  |  | FolChang533 |  |  | FolChang534 |  |  | FolChang535 |  |  | FolChang536 |  |  | FolChang537 |  |  | FolChang538 |  |  | FolChang539 |  |  | FolChang540 |  |  | FolChang541 |  |  | FolChang542 |  |  | FolChang543 |  |  | FolChang544 |  |  | FolChang545 |  |  | FolChang546 |  |  | FolChang547 |  |  | FolChang548 |  |  | FolChang549 |  |  | FolChang550 |  |  | FolChang551 |  |  | FolChang552 |  |  | FolChang553 |  |  | FolChang554 |  |  | FolChang555 |  |  | FolChang556 |  |  | FolChang557 |  |  | FolChang558 |  |  | FolChang559 |  |  | FolChang560 |  |  | FolChang561 |  |  | FolChang562 |  |  | FolChang563 |  |  | FolChang564 |  |  | FolChang565 |  |  | FolChang566 |  |  | FolChang567 |  |  | FolChang568 |  |  | FolChang569 |  |  | FolChang570 |  |  | FolChang571 |  |  | FolChang572 |  |  | FolChang573 |  |  | FolChang574 |  |  | FolChang575 |  |  | FolChang576 |  |  | FolChang577 |  |  | FolChang578 |  |  | FolChang579 |  |  | FolChang580 |  |  | FolChang581 |  |  | FolChang582 |  |  | FolChang583 |  |  | FolChang584 |  |  | FolChang585 |  |  | FolChang586 |  |  | FolChang587 |  |  | FolChang588 |  |  | FolChang589 |  |  | FolChang590 |  |  | FolChang591 |  |  | FolChang592 |  |  | FolChang593 |  |  | FolChang594 |  |  | FolChang595 |  |  | FolChang596 |  |  | FolChang597 |  |  | FolChang598 |  |  | FolChang599 |  |  | FolChang600 |  |  | FolChang601 |  |  | FolChang602 |  |  | FolChang603 |  |  | FolChang604 |  |  | FolChang605 |  |  | FolChang606 |  |  | FolChang607 |  |  | FolChang608 |  |  | FolChang609 |  |  | FolChang610 |  |  | FolChang611 |  |  | FolChang612 |  |  | FolChang613 |  |  | FolChang614 |  |  | FolChang615 |  |  | FolChang616 |  |  | FolChang617 |  |  | FolChang618 |  |  | FolChang619 |  |  | FolChang620 |  |  | FolChang621 |  |  | FolChang622 |  |  | FolChang623 |  |  | FolChang624 |  |  | FolChang625 |  |  | FolChang626 |  |  | FolChang627 |  |  | FolChang628 |  |  | FolChang629 |  |  | FolChang630 |  |  | FolChang631 |  |  | FolChang632 |  |  | FolChang633 |  |  | FolChang634 |  |  | FolChang635 |  |  | FolChang636 |  |  | FolChang637 |  |  | FolChang638 |  |  | FolChang639 |  |  | FolChang640 |  |  | FolChang641 |  |  | FolChang642 |  |  | FolChang643 |  |  | FolChang644 |  |  | FolChang645 |  |  | FolChang646 |  |  | FolChang647 |  |  | FolChang648 |  |  | FolChang649 |  |  | FolChang650 |  |  | FolChang651 |  |  | FolChang652 |  |  | FolChang653 |  |  | FolChang654 |  |  | FolChang655 |  |  | FolChang656 |  |  | FolChang657 |  |  | FolChang658 |  |  | FolChang659 |  |  | FolChang660 |  |  | FolChang661 |  |  | FolChang662 |  |  | FolChang663 |  |  | FolChang664 |  |  | FolChang665 |  |  | FolChang666 |  |  | FolChang667 |  |  | FolChang668 |  |  | FolChang669 |  |  | FolChang670 |  |  | FolChang671 |  |  | FolChang672 |  |  | FolChang673 |  |  | FolChang674 |  |  | FolChang675 |  |  | FolChang676 |  |  | FolChang677 |  |  | FolChang678 |  |  | FolChang679 |  |  | FolChang680 |  |  | FolChang681 |  |  | FolChang682 |  |  | FolChang683 |  |  | FolChang684 |  |  | FolChang685 |  |  | FolChang686 |  |  | FolChang687 |  |  | FolChang688 |  |  | FolChang689 |  |  | FolChang690 |  |  | FolChang691 |  |  | FolChang692 |  |  | FolChang693 |  |  | FolChang694 |  |  | FolChang695 |  |  | FolChang696 |  |  | FolChang697 |  |  | FolChang698 |  |  | FolChang699 |  |  | FolChang700 |  |  | FolChang701 |  |  | FolChang702 |  |  | FolChang703 |  |  | FolChang704 |  |  | FolChang705 |  |  | FolChang706 |  |  | FolChang707 |  |  | FolChang708 |  |  | FolChang709 |  |  | FolChang710 |  |  | FolChang711 |  |  | FolChang712 |  |  | FolChang713 |  |  | FolChang714 |  |  | FolChang715 |  |  | FolChang716 |  |  | FolChang717 |  |  | FolChang718 |  |  | FolChang719 |  |  | FolChang720 |  |  | FolChang721 |  |  | FolChang722 |  |  | FolChang723 |  |  | FolChang724 |  |  | FolChang725 |  |  | FolChang726 |  |  | FolChang727 |  |  | FolChang728 |  |  | FolChang729 |  |  | FolChang730 |  |  | FolChang731 |  |  | FolChang732 |  |  | FolChang733 |  |  | FolChang734 |  |  | FolChang735 |  |  | FolChang736 |  |  | FolChang737 |  |  | FolChang738 |  |  | FolChang739 |  |  | FolChang740 |  |  | FolChang741 |  |  | FolChang742 |  |  | FolChang743 |  |  | FolChang744 |  |  | FolChang745 |  |  | FolChang746 |  |  | FolChang747 |  |  | FolChang748 |  |  | FolChang749 |  |  | FolChang750 |  |  | FolChang751 |  |  | FolChang752 |  |  | FolChang753 |  |  | FolChang754 |  |  | FolChang755 |  |  | FolChang756 |  |  | FolChang757 |  |  | FolChang758 |  |  | FolChang759 |  |  | FolChang760 |  |  | FolChang761 |  |  | FolChang762 |  |  | FolChang763 |  |  | FolChang764 |  |  | FolChang765 |  |  | FolChang766 |  |  | FolChang767 |  |  | FolChang768 |  |  | FolChang769 |  |  | FolChang770 |  |  | FolChang771 |  |  | FolChang772 |  |  | FolChang773 |  |  | FolChang774 |  |  | FolChang775 |  |  | FolChang776 |  |  | FolChang777 |  |  | FolChang778 |  |  | FolChang779 |  |  | FolChang780 |  |  | FolChang781 |  |  | FolChang782 |  |  | FolChang783 |  |  | FolChang784 |  |  | FolChang785 |  |  | FolChang786 |  |  | FolChang787 |  |  | FolChang788 |  |  | FolChang789 |  |  | FolChang790 |  |  | FolChang791 |  |  | FolChang792 |  |  | FolChang793 |  |  | FolChang794 |  |  | FolChang795 |  |  | FolChang796 |  |  | FolChang797 |  |  | FolChang798 |  |  | FolChang799 |  |  | FolChang800 |  |  | FolChang801 |  |  | FolChang802 |  |  | FolChang803 |  |  | FolChang804 |  |  | FolChang805 |  |  | FolChang806 |  |  | FolChang807 |  |  | FolChang808 |  |  | FolChang809 |  |  | FolChang810 |  |  | FolChang811 |  |  | FolChang812 |  |  | FolChang813 |  |  | FolChang814 |  |  | FolChang815 |  |  | FolChang816 |  |  | FolChang817 |  |  | FolChang818 |  |  | FolChang819 |  |  | FolChang820 |  |  | FolChang821 |  |  | FolChang822 |  |  | FolChang823 |  |  | FolChang824 |  |  | FolChang825 |  |  | FolChang826 |  |  | FolChang827 |  |  | FolChang828 |  |  | FolChang829 |  |  | FolChang830 |  |  | FolChang831 |  |  | FolChang832 |  |  | FolChang833 |  |  | FolChang834 |  |  | FolChang835 |  |  | FolChang836 |  |  | FolChang837 |  |  | FolChang838 |  |  | FolChang839 |  |  | FolChang840 |  |  | FolChang841 |  |  | FolChang842 |  |  | FolChang843 |  |  | FolChang844 |  |  | FolChang845 |  |  | FolChang846 |  |  | FolChang847 |  |  | FolChang848 |  |  | FolChang849 |  |  | FolChang850 |  |  | FolChang851 |  |  | FolChang852 |  |  | FolChang853 |  |  | FolChang854 |  |  | FolChang855 |  |  | FolChang856 |  |  | FolChang857 |  |  | FolChang858 |  |  | FolChang859 |  |  | FolChang860 |  |  | FolChang861 |  |  | FolChang862 |  |  | FolChang863 |  |  | FolChang864 |  |  | FolChang865 |  |  | FolChang866 |  |  | FolChang867 |  |  | FolChang868 |  |  | FolChang869 |  |  | FolChang870 |  |  | FolChang871 |  |  | FolChang872 |  |  | FolChang873 |  |  | FolChang874 |  |  | FolChang875 |  |  | FolChang876 |  |  | FolChang877 |  |  | FolChang878 |  |  | FolChang879 |  |  | FolChang880 |  |  | FolChang881 |  |  | FolChang882 |  |  | FolChang883 |  |  | FolChang884 |  |  | FolChang885 |  |  | FolChang886 |  |  | FolChang887 |  |  | FolChang888 |  |  | FolChang889 |  |  | FolChang890 |  |  | FolChang891 |  |  | FolChang892 |  |  | FolChang893 |  |  | FolChang894 |  |  | FolChang895 |  |  | FolChang896 |  |  | FolChang897 |  |  | FolChang898 |  |  | FolChang899 |  |  | FolChang900 |  |  | FolChang901 |  |  | FolChang902 |  |  | FolChang903 |  |  | FolChang904 |  |  | FolChang905 |  |  | FolChang906 |  |  | FolChang907 |  |  | FolChang908 |  |  | FolChang909 |  |  | FolChang910 |  |  | FolChang911 |  |  | FolChang912 |  |  | FolChang913 |  |  | FolChang914 |  |  | FolChang915 |  |  | FolChang916 |  |  | FolChang917 |  |  | FolChang918 |  |  | FolChang919 |  |  | FolChang920 |  |  | FolChang921 |  |  | FolChang922 |  |  | FolChang923 |  |  | FolChang924 |  |  | FolChang925 |  |  | FolChang926 |  |  | FolChang927 |  |  | FolChang928 |  |  | FolChang929 |  |  | FolChang930 |  |  | FolChang931 |  |  | FolChang932 |  |  | FolChang933 |  |  | FolChang934 |  |  | FolChang935 |  |  | FolChang936 |  |  | FolChang937 |  |  | FolChang938 |  |  | FolChang939 |  |  | FolChang940 |  |  | FolChang941 |  |  | FolChang942 |  |  | FolChang943 |  |  | FolChang944 |  |  | FolChang945 |  |  | FolChang946 |  |  | FolChang947 |  |  | FolChang948 |  |  | FolChang949 |  |  | FolChang950 |  |  | FolChang951 |  |  | FolChang952 |  |  | FolChang953 |  |  | FolChang954 |  |  | FolChang955 |  |  | FolChang956 |  |  | FolChang957 |  |  | FolChang958 |  |  | FolChang959 |  |  | FolChang960 |  |  | FolChang961 |  |  | FolChang962 |  |  | FolChang963 |  |  | FolChang964 |  |  | FolChang965 |  |  | FolChang966 |  |  | FolChang967 |  |  | FolChang968 |  |  | FolChang969 |  |  | FolChang970 |  |  | FolChang971 |  |  |
|---------|---------|-------------|--|--|-------------|--|--|-------------|--|--|-------------|--|--|-------------|--|--|-------------|--|--|-------------|--|--|-------------|--|--|-------------|--|--|-------------|--|--|-------------|--|--|-------------|--|--|-------------|--|--|-------------|--|--|-------------|--|--|-------------|--|--|-------------|--|--|-------------|--|--|-------------|--|--|-------------|--|--|-------------|--|--|-------------|--|--|-------------|--|--|-------------|--|--|-------------|--|--|-------------|--|--|-------------|--|--|-------------|--|--|-------------|--|--|-------------|--|--|-------------|--|--|-------------|--|--|-------------|--|--|-------------|--|--|-------------|--|--|-------------|--|--|-------------|--|--|-------------|--|--|-------------|--|--|-------------|--|--|-------------|--|--|-------------|--|--|-------------|--|--|-------------|--|--|-------------|--|--|-------------|--|--|-------------|--|--|-------------|--|--|-------------|--|--|-------------|--|--|-------------|--|--|-------------|--|--|-------------|--|--|-------------|--|--|-------------|--|--|-------------|--|--|-------------|--|--|-------------|--|--|-------------|--|--|-------------|--|--|-------------|--|--|-------------|--|--|-------------|--|--|-------------|--|--|-------------|--|--|-------------|--|--|-------------|--|--|-------------|--|--|-------------|--|--|-------------|--|--|-------------|--|--|-------------|--|--|-------------|--|--|-------------|--|--|-------------|--|--|-------------|--|--|-------------|--|--|-------------|--|--|-------------|--|--|-------------|--|--|-------------|--|--|-------------|--|--|-------------|--|--|-------------|--|--|-------------|--|--|-------------|--|--|-------------|--|--|-------------|--|--|-------------|--|--|-------------|--|--|-------------|--|--|-------------|--|--|-------------|--|--|-------------|--|--|-------------|--|--|-------------|--|--|-------------|--|--|-------------|--|--|-------------|--|--|-------------|--|--|-------------|--|--|-------------|--|--|-------------|--|--|-------------|--|--|-------------|--|--|-------------|--|--|-------------|--|--|-------------|--|--|-------------|--|--|-------------|--|--|-------------|--|--|-------------|--|--|-------------|--|--|-------------|--|--|-------------|--|--|-------------|--|--|-------------|--|--|-------------|--|--|-------------|--|--|-------------|--|--|-------------|--|--|-------------|--|--|-------------|--|--|-------------|--|--|-------------|--|--|-------------|--|--|-------------|--|--|-------------|--|--|-------------|--|--|-------------|--|--|-------------|--|--|-------------|--|--|-------------|--|--|-------------|--|--|-------------|--|--|-------------|--|--|-------------|--|--|-------------|--|--|-------------|--|--|-------------|--|--|-------------|--|--|-------------|--|--|-------------|--|--|-------------|--|--|-------------|--|--|-------------|--|--|-------------|--|--|-------------|--|--|-------------|--|--|-------------|--|--|-------------|--|--|-------------|--|--|-------------|--|--|-------------|--|--|-------------|--|--|-------------|--|--|-------------|--|--|-------------|--|--|-------------|--|--|-------------|--|--|-------------|--|--|-------------|--|--|-------------|--|--|-------------|--|--|-------------|--|--|-------------|--|--|-------------|--|--|-------------|--|--|-------------|--|--|-------------|--|--|-------------|--|--|-------------|--|--|-------------|--|--|-------------|--|--|-------------|--|--|-------------|--|--|-------------|--|--|-------------|--|--|-------------|--|--|-------------|--|--|-------------|--|--|-------------|--|--|-------------|--|--|-------------|--|--|-------------|--|--|-------------|--|--|-------------|--|--|-------------|--|--|-------------|--|--|-------------|--|--|-------------|--|--|-------------|--|--|-------------|--|--|-------------|--|--|-------------|--|--|-------------|--|--|-------------|--|--|-------------|--|--|-------------|--|--|-------------|--|--|-------------|--|--|-------------|--|--|-------------|--|--|-------------|--|--|-------------|--|--|-------------|--|--|-------------|--|--|-------------|--|--|-------------|--|--|-------------|--|--|-------------|--|--|-------------|--|--|-------------|--|--|-------------|--|--|-------------|--|--|-------------|--|--|-------------|--|--|-------------|--|--|-------------|--|--|-------------|--|--|-------------|--|--|-------------|--|--|-------------|--|--|-------------|--|--|-------------|--|--|-------------|--|--|-------------|--|--|-------------|--|--|-------------|--|--|-------------|--|--|-------------|--|--|-------------|--|--|-------------|--|--|-------------|--|--|-------------|--|--|-------------|--|--|-------------|--|--|-------------|--|--|-------------|--|--|-------------|--|--|-------------|--|--|-------------|--|--|-------------|--|--|-------------|--|--|-------------|--|--|-------------|--|--|-------------|--|--|-------------|--|--|-------------|--|--|-------------|--|--|-------------|--|--|-------------|--|--|-------------|--|--|-------------|--|--|-------------|--|--|-------------|--|--|-------------|--|--|-------------|--|--|-------------|--|--|-------------|--|--|-------------|--|--|-------------|--|--|-------------|--|--|-------------|--|--|-------------|--|--|-------------|--|--|-------------|--|--|-------------|--|--|-------------|--|--|-------------|--|--|-------------|--|--|-------------|--|--|-------------|--|--|-------------|--|--|-------------|--|--|-------------|--|--|-------------|--|--|-------------|--|--|-------------|--|--|-------------|--|--|-------------|--|--|-------------|--|--|-------------|--|--|-------------|--|--|-------------|--|--|-------------|--|--|-------------|--|--|-------------|--|--|-------------|--|--|-------------|--|--|-------------|--|--|-------------|--|--|-------------|--|--|-------------|--|--|-------------|--|--|-------------|--|--|-------------|--|--|-------------|--|--|-------------|--|--|-------------|--|--|-------------|--|--|-------------|--|--|-------------|--|--|-------------|--|--|-------------|--|--|-------------|--|--|-------------|--|--|-------------|--|--|-------------|--|--|-------------|--|--|-------------|--|--|-------------|--|--|-------------|--|--|-------------|--|--|-------------|--|--|-------------|--|--|-------------|--|--|-------------|--|--|-------------|--|--|-------------|--|--|-------------|--|--|-------------|--|--|-------------|--|--|-------------|--|--|-------------|--|--|-------------|--|--|-------------|--|--|-------------|--|--|-------------|--|--|-------------|--|--|-------------|--|--|-------------|--|--|-------------|--|--|-------------|--|--|-------------|--|--|-------------|--|--|-------------|--|--|-------------|--|--|-------------|--|--|-------------|--|--|-------------|--|--|-------------|--|--|-------------|--|--|-------------|--|--|-------------|--|--|-------------|--|--|-------------|--|--|-------------|--|--|-------------|--|--|-------------|--|--|-------------|--|--|-------------|--|--|-------------|--|--|-------------|--|--|-------------|--|--|-------------|--|--|-------------|--|--|-------------|--|--|-------------|--|--|-------------|--|--|-------------|--|--|-------------|--|--|-------------|--|--|-------------|--|--|-------------|--|--|-------------|--|--|-------------|--|--|-------------|--|--|-------------|--|--|-------------|--|--|-------------|--|--|-------------|--|--|-------------|--|--|-------------|--|--|-------------|--|--|-------------|--|--|-------------|--|--|-------------|--|--|-------------|--|--|-------------|--|--|-------------|--|--|-------------|--|--|-------------|--|--|-------------|--|--|-------------|--|--|-------------|--|--|-------------|--|--|-------------|--|--|-------------|--|--|-------------|--|--|-------------|--|--|-------------|--|--|-------------|--|--|-------------|--|--|-------------|--|--|-------------|--|--|-------------|--|--|-------------|--|--|-------------|--|--|-------------|--|--|-------------|--|--|-------------|--|--|-------------|--|--|-------------|--|--|-------------|--|--|-------------|--|--|-------------|--|--|-------------|--|--|-------------|--|--|-------------|--|--|-------------|--|--|-------------|--|--|-------------|--|--|-------------|--|--|-------------|--|--|-------------|--|--|-------------|--|--|-------------|--|--|-------------|--|--|-------------|--|--|-------------|--|--|-------------|--|--|-------------|--|--|-------------|--|--|-------------|--|--|-------------|--|--|-------------|--|--|-------------|--|--|-------------|--|--|-------------|--|--|-------------|--|--|-------------|--|--|-------------|--|--|-------------|--|--|-------------|--|--|-------------|--|--|-------------|--|--|-------------|--|--|-------------|--|--|-------------|--|--|-------------|--|--|-------------|--|--|-------------|--|--|-------------|--|--|-------------|--|--|-------------|--|--|-------------|--|--|-------------|--|--|-------------|--|--|-------------|--|--|-------------|--|--|-------------|--|--|-------------|--|--|-------------|--|--|-------------|--|--|-------------|--|--|-------------|--|--|-------------|--|--|-------------|--|--|-------------|--|--|-------------|--|--|-------------|--|--|-------------|--|--|-------------|--|--|-------------|--|--|-------------|--|--|-------------|--|--|-------------|--|--|-------------|--|--|-------------|--|--|-------------|--|--|-------------|--|--|-------------|--|--|-------------|--|--|-------------|--|--|-------------|--|--|-------------|--|--|-------------|--|--|-------------|--|--|-------------|--|--|-------------|--|--|-------------|--|--|-------------|--|--|-------------|--|--|-------------|--|--|-------------|--|--|-------------|--|--|-------------|--|--|-------------|--|--|-------------|--|--|-------------|--|--|-------------|--|--|-------------|--|--|-------------|--|--|-------------|--|--|-------------|--|--|-------------|--|--|-------------|--|--|-------------|--|--|-------------|--|--|-------------|--|--|-------------|--|--|-------------|--|--|-------------|--|--|-------------|--|--|-------------|--|--|-------------|--|--|-------------|--|--|-------------|--|--|-------------|--|--|-------------|--|--|-------------|--|--|-------------|--|--|-------------|--|--|-------------|--|--|-------------|--|--|-------------|--|--|-------------|--|--|-------------|--|--|-------------|--|--|-------------|--|--|-------------|--|--|-------------|--|--|-------------|--|--|-------------|--|--|-------------|--|--|-------------|--|--|-------------|--|--|-------------|--|--|-------------|--|--|-------------|--|--|-------------|--|--|-------------|--|--|-------------|--|--|-------------|--|--|-------------|--|--|-------------|--|--|-------------|--|--|-------------|--|--|-------------|--|--|-------------|--|--|-------------|--|--|-------------|--|--|-------------|--|--|-------------|--|--|-------------|--|--|-------------|--|--|-------------|--|--|-------------|--|--|-------------|--|--|-------------|--|--|-------------|--|--|-------------|--|--|-------------|--|--|-------------|--|--|-------------|--|--|-------------|--|--|-------------|--|--|-------------|--|--|-------------|--|--|-------------|--|--|-------------|--|--|-------------|--|--|-------------|--|--|-------------|--|--|-------------|--|--|-------------|--|--|-------------|--|--|-------------|--|--|-------------|--|--|-------------|--|--|-------------|--|--|-------------|--|--|-------------|--|--|-------------|--|--|-------------|--|--|-------------|--|--|-------------|--|--|-------------|--|--|-------------|--|--|-------------|--|--|-------------|--|--|-------------|--|--|-------------|--|--|-------------|--|--|-------------|--|--|-------------|--|--|-------------|--|--|-------------|--|--|-------------|--|--|-------------|--|--|-------------|--|--|-------------|--|--|-------------|--|--|-------------|--|--|-------------|--|--|-------------|--|--|-------------|--|--|-------------|--|--|-------------|--|--|-------------|--|--|-------------|--|--|-------------|--|--|-------------|--|--|-------------|--|--|-------------|--|--|-------------|--|--|-------------|--|--|-------------|--|--|-------------|--|--|-------------|--|--|-------------|--|--|-------------|--|--|-------------|--|--|-------------|--|--|-------------|--|--|-------------|--|--|-------------|--|--|-------------|--|--|-------------|--|--|-------------|--|--|-------------|--|--|-------------|--|--|-------------|--|--|-------------|--|--|-------------|--|--|-------------|--|--|-------------|--|--|-------------|--|--|-------------|--|--|-------------|--|--|-------------|--|--|-------------|--|--|-------------|--|--|-------------|--|--|-------------|--|--|-------------|--|--|-------------|--|--|-------------|--|--|-------------|--|--|-------------|--|--|-------------|--|--|-------------|--|--|-------------|--|--|-------------|--|--|-------------|--|--|-------------|--|--|-------------|--|--|-------------|--|--|-------------|--|--|-------------|--|--|-------------|--|--|-------------|--|--|-------------|--|--|-------------|--|--|-------------|--|--|-------------|--|--|-------------|--|--|-------------|--|--|-------------|--|--|-------------|--|--|-------------|--|--|-------------|--|--|-------------|--|--|-------------|--|--|-------------|--|--|-------------|--|--|-------------|--|--|-------------|--|--|-------------|--|--|-------------|--|--|-------------|--|--|-------------|--|--|-------------|--|--|-------------|--|--|-------------|--|--|-------------|--|--|-------------|--|--|-------------|--|--|-------------|--|--|-------------|--|--|-------------|--|--|-------------|--|--|-------------|--|--|-------------|--|--|-------------|--|--|-------------|--|--|-------------|--|--|-------------|--|--|-------------|--|--|-------------|--|--|-------------|--|--|-------------|--|--|-------------|--|--|-------------|--|--|-------------|--|--|-------------|--|--|-------------|--|--|-------------|--|--|-------------|--|--|-------------|--|--|-------------|--|--|-------------|--|--|-------------|--|--|-------------|--|--|-------------|--|--|-------------|--|--|-------------|--|--|-------------|--|--|-------------|--|--|-------------|--|--|-------------|--|--|-------------|--|--|-------------|--|--|-------------|--|--|-------------|--|--|-------------|--|--|-------------|--|--|-------------|--|--|-------------|--|--|-------------|--|--|-------------|--|--|-------------|--|--|-------------|--|--|-------------|--|--|-------------|--|--|-------------|--|--|-------------|--|--|-------------|--|--|-------------|--|--|-------------|--|--|-------------|--|--|-------------|--|--|-------------|--|--|-------------|--|--|-------------|--|--|-------------|--|--|-------------|--|--|-------------|--|--|-------------|--|--|-------------|--|--|-------------|--|--|-------------|--|--|-------------|--|--|-------------|--|--|-------------|--|--|-------------|--|--|-------------|--|--|-------------|--|--|-------------|--|--|-------------|--|--|-------------|--|--|-------------|--|--|-------------|--|--|-------------|--|--|-------------|--|--|-------------|--|--|-------------|--|--|-------------|--|--|-------------|--|--|-------------|--|--|-------------|--|--|-------------|--|--|-------------|--|--|-------------|--|--|-------------|--|--|-------------|--|--|-------------|--|--|-------------|--|--|-------------|--|--|-------------|--|--|-------------|--|--|-------------|--|--|-------------|--|--|-------------|--|--|-------------|--|--|-------------|--|--|-------------|--|--|-------------|--|--|-------------|--|--|-------------|--|--|-------------|--|--|-------------|--|--|-------------|--|--|-------------|--|--|-------------|--|--|-------------|--|--|-------------|--|--|-------------|--|--|-------------|--|--|-------------|--|--|-------------|--|--|-------------|--|--|-------------|--|--|-------------|--|--|-------------|--|--|-------------|--|--|-------------|--|--|-------------|--|--|-------------|--|--|-------------|--|--|-------------|--|--|-------------|--|--|-------------|--|--|-------------|--|--|-------------|--|--|-------------|--|--|-------------|--|--|-------------|--|--|-------------|--|--|-------------|--|--|-------------|--|--|-------------|--|--|-------------|--|--|-------------|--|--|-------------|--|--|-------------|--|--|-------------|--|--|-------------|--|--|-------------|--|--|-------------|--|--|-------------|--|--|-------------|--|--|-------------|--|--|
|---------|---------|-------------|--|--|-------------|--|--|-------------|--|--|-------------|--|--|-------------|--|--|-------------|--|--|-------------|--|--|-------------|--|--|-------------|--|--|-------------|--|--|-------------|--|--|-------------|--|--|-------------|--|--|-------------|--|--|-------------|--|--|-------------|--|--|-------------|--|--|-------------|--|--|-------------|--|--|-------------|--|--|-------------|--|--|-------------|--|--|-------------|--|--|-------------|--|--|-------------|--|--|-------------|--|--|-------------|--|--|-------------|--|--|-------------|--|--|-------------|--|--|-------------|--|--|-------------|--|--|-------------|--|--|-------------|--|--|-------------|--|--|-------------|--|--|-------------|--|--|-------------|--|--|-------------|--|--|-------------|--|--|-------------|--|--|-------------|--|--|-------------|--|--|-------------|--|--|-------------|--|--|-------------|--|--|-------------|--|--|-------------|--|--|-------------|--|--|-------------|--|--|-------------|--|--|-------------|--|--|-------------|--|--|-------------|--|--|-------------|--|--|-------------|--|--|-------------|--|--|-------------|--|--|-------------|--|--|-------------|--|--|-------------|--|--|-------------|--|--|-------------|--|--|-------------|--|--|-------------|--|--|-------------|--|--|-------------|--|--|-------------|--|--|-------------|--|--|-------------|--|--|-------------|--|--|-------------|--|--|-------------|--|--|-------------|--|--|-------------|--|--|-------------|--|--|-------------|--|--|-------------|--|--|-------------|--|--|-------------|--|--|-------------|--|--|-------------|--|--|-------------|--|--|-------------|--|--|-------------|--|--|-------------|--|--|-------------|--|--|-------------|--|--|-------------|--|--|-------------|--|--|-------------|--|--|-------------|--|--|-------------|--|--|-------------|--|--|-------------|--|--|-------------|--|--|-------------|--|--|-------------|--|--|-------------|--|--|-------------|--|--|-------------|--|--|-------------|--|--|-------------|--|--|-------------|--|--|-------------|--|--|-------------|--|--|-------------|--|--|-------------|--|--|-------------|--|--|-------------|--|--|-------------|--|--|-------------|--|--|-------------|--|--|-------------|--|--|-------------|--|--|-------------|--|--|-------------|--|--|-------------|--|--|-------------|--|--|-------------|--|--|-------------|--|--|-------------|--|--|-------------|--|--|-------------|--|--|-------------|--|--|-------------|--|--|-------------|--|--|-------------|--|--|-------------|--|--|-------------|--|--|-------------|--|--|-------------|--|--|-------------|--|--|-------------|--|--|-------------|--|--|-------------|--|--|-------------|--|--|-------------|--|--|-------------|--|--|-------------|--|--|-------------|--|--|-------------|--|--|-------------|--|--|-------------|--|--|-------------|--|--|-------------|--|--|-------------|--|--|-------------|--|--|-------------|--|--|-------------|--|--|-------------|--|--|-------------|--|--|-------------|--|--|-------------|--|--|-------------|--|--|-------------|--|--|-------------|--|--|-------------|--|--|-------------|--|--|-------------|--|--|-------------|--|--|-------------|--|--|-------------|--|--|-------------|--|--|-------------|--|--|-------------|--|--|-------------|--|--|-------------|--|--|-------------|--|--|-------------|--|--|-------------|--|--|-------------|--|--|-------------|--|--|-------------|--|--|-------------|--|--|-------------|--|--|-------------|--|--|-------------|--|--|-------------|--|--|-------------|--|--|-------------|--|--|-------------|--|--|-------------|--|--|-------------|--|--|-------------|--|--|-------------|--|--|-------------|--|--|-------------|--|--|-------------|--|--|-------------|--|--|-------------|--|--|-------------|--|--|-------------|--|--|-------------|--|--|-------------|--|--|-------------|--|--|-------------|--|--|-------------|--|--|-------------|--|--|-------------|--|--|-------------|--|--|-------------|--|--|-------------|--|--|-------------|--|--|-------------|--|--|-------------|--|--|-------------|--|--|-------------|--|--|-------------|--|--|-------------|--|--|-------------|--|--|-------------|--|--|-------------|--|--|-------------|--|--|-------------|--|--|-------------|--|--|-------------|--|--|-------------|--|--|-------------|--|--|-------------|--|--|-------------|--|--|-------------|--|--|-------------|--|--|-------------|--|--|-------------|--|--|-------------|--|--|-------------|--|--|-------------|--|--|-------------|--|--|-------------|--|--|-------------|--|--|-------------|--|--|-------------|--|--|-------------|--|--|-------------|--|--|-------------|--|--|-------------|--|--|-------------|--|--|-------------|--|--|-------------|--|--|-------------|--|--|-------------|--|--|-------------|--|--|-------------|--|--|-------------|--|--|-------------|--|--|-------------|--|--|-------------|--|--|-------------|--|--|-------------|--|--|-------------|--|--|-------------|--|--|-------------|--|--|-------------|--|--|-------------|--|--|-------------|--|--|-------------|--|--|-------------|--|--|-------------|--|--|-------------|--|--|-------------|--|--|-------------|--|--|-------------|--|--|-------------|--|--|-------------|--|--|-------------|--|--|-------------|--|--|-------------|--|--|-------------|--|--|-------------|--|--|-------------|--|--|-------------|--|--|-------------|--|--|-------------|--|--|-------------|--|--|-------------|--|--|-------------|--|--|-------------|--|--|-------------|--|--|-------------|--|--|-------------|--|--|-------------|--|--|-------------|--|--|-------------|--|--|-------------|--|--|-------------|--|--|-------------|--|--|-------------|--|--|-------------|--|--|-------------|--|--|-------------|--|--|-------------|--|--|-------------|--|--|-------------|--|--|-------------|--|--|-------------|--|--|-------------|--|--|-------------|--|--|-------------|--|--|-------------|--|--|-------------|--|--|-------------|--|--|-------------|--|--|-------------|--|--|-------------|--|--|-------------|--|--|-------------|--|--|-------------|--|--|-------------|--|--|-------------|--|--|-------------|--|--|-------------|--|--|-------------|--|--|-------------|--|--|-------------|--|--|-------------|--|--|-------------|--|--|-------------|--|--|-------------|--|--|-------------|--|--|-------------|--|--|-------------|--|--|-------------|--|--|-------------|--|--|-------------|--|--|-------------|--|--|-------------|--|--|-------------|--|--|-------------|--|--|-------------|--|--|-------------|--|--|-------------|--|--|-------------|--|--|-------------|--|--|-------------|--|--|-------------|--|--|-------------|--|--|-------------|--|--|-------------|--|--|-------------|--|--|-------------|--|--|-------------|--|--|-------------|--|--|-------------|--|--|-------------|--|--|-------------|--|--|-------------|--|--|-------------|--|--|-------------|--|--|-------------|--|--|-------------|--|--|-------------|--|--|-------------|--|--|-------------|--|--|-------------|--|--|-------------|--|--|-------------|--|--|-------------|--|--|-------------|--|--|-------------|--|--|-------------|--|--|-------------|--|--|-------------|--|--|-------------|--|--|-------------|--|--|-------------|--|--|-------------|--|--|-------------|--|--|-------------|--|--|-------------|--|--|-------------|--|--|-------------|--|--|-------------|--|--|-------------|--|--|-------------|--|--|-------------|--|--|-------------|--|--|-------------|--|--|-------------|--|--|-------------|--|--|-------------|--|--|-------------|--|--|-------------|--|--|-------------|--|--|-------------|--|--|-------------|--|--|-------------|--|--|-------------|--|--|-------------|--|--|-------------|--|--|-------------|--|--|-------------|--|--|-------------|--|--|-------------|--|--|-------------|--|--|-------------|--|--|-------------|--|--|-------------|--|--|-------------|--|--|-------------|--|--|-------------|--|--|-------------|--|--|-------------|--|--|-------------|--|--|-------------|--|--|-------------|--|--|-------------|--|--|-------------|--|--|-------------|--|--|-------------|--|--|-------------|--|--|-------------|--|--|-------------|--|--|-------------|--|--|-------------|--|--|-------------|--|--|-------------|--|--|-------------|--|--|-------------|--|--|-------------|--|--|-------------|--|--|-------------|--|--|-------------|--|--|-------------|--|--|-------------|--|--|-------------|--|--|-------------|--|--|-------------|--|--|-------------|--|--|-------------|--|--|-------------|--|--|-------------|--|--|-------------|--|--|-------------|--|--|-------------|--|--|-------------|--|--|-------------|--|--|-------------|--|--|-------------|--|--|-------------|--|--|-------------|--|--|-------------|--|--|-------------|--|--|-------------|--|--|-------------|--|--|-------------|--|--|-------------|--|--|-------------|--|--|-------------|--|--|-------------|--|--|-------------|--|--|-------------|--|--|-------------|--|--|-------------|--|--|-------------|--|--|-------------|--|--|-------------|--|--|-------------|--|--|-------------|--|--|-------------|--|--|-------------|--|--|-------------|--|--|-------------|--|--|-------------|--|--|-------------|--|--|-------------|--|--|-------------|--|--|-------------|--|--|-------------|--|--|-------------|--|--|-------------|--|--|-------------|--|--|-------------|--|--|-------------|--|--|-------------|--|--|-------------|--|--|-------------|--|--|-------------|--|--|-------------|--|--|-------------|--|--|-------------|--|--|-------------|--|--|-------------|--|--|-------------|--|--|-------------|--|--|-------------|--|--|-------------|--|--|-------------|--|--|-------------|--|--|-------------|--|--|-------------|--|--|-------------|--|--|-------------|--|--|-------------|--|--|-------------|--|--|-------------|--|--|-------------|--|--|-------------|--|--|-------------|--|--|-------------|--|--|-------------|--|--|-------------|--|--|-------------|--|--|-------------|--|--|-------------|--|--|-------------|--|--|-------------|--|--|-------------|--|--|-------------|--|--|-------------|--|--|-------------|--|--|-------------|--|--|-------------|--|--|-------------|--|--|-------------|--|--|-------------|--|--|-------------|--|--|-------------|--|--|-------------|--|--|-------------|--|--|-------------|--|--|-------------|--|--|-------------|--|--|-------------|--|--|-------------|--|--|-------------|--|--|-------------|--|--|-------------|--|--|-------------|--|--|-------------|--|--|-------------|--|--|-------------|--|--|-------------|--|--|-------------|--|--|-------------|--|--|-------------|--|--|-------------|--|--|-------------|--|--|-------------|--|--|-------------|--|--|-------------|--|--|-------------|--|--|-------------|--|--|-------------|--|--|-------------|--|--|-------------|--|--|-------------|--|--|-------------|--|--|-------------|--|--|-------------|--|--|-------------|--|--|-------------|--|--|-------------|--|--|-------------|--|--|-------------|--|--|-------------|--|--|-------------|--|--|-------------|--|--|-------------|--|--|-------------|--|--|-------------|--|--|-------------|--|--|-------------|--|--|-------------|--|--|-------------|--|--|-------------|--|--|-------------|--|--|-------------|--|--|-------------|--|--|-------------|--|--|-------------|--|--|-------------|--|--|-------------|--|--|-------------|--|--|-------------|--|--|-------------|--|--|-------------|--|--|-------------|--|--|-------------|--|--|-------------|--|--|-------------|--|--|-------------|--|--|-------------|--|--|-------------|--|--|-------------|--|--|-------------|--|--|-------------|--|--|-------------|--|--|-------------|--|--|-------------|--|--|-------------|--|--|-------------|--|--|-------------|--|--|-------------|--|--|-------------|--|--|-------------|--|--|-------------|--|--|-------------|--|--|-------------|--|--|-------------|--|--|-------------|--|--|-------------|--|--|-------------|--|--|-------------|--|--|-------------|--|--|-------------|--|--|-------------|--|--|-------------|--|--|-------------|--|--|-------------|--|--|-------------|--|--|-------------|--|--|-------------|--|--|-------------|--|--|-------------|--|--|-------------|--|--|-------------|--|--|-------------|--|--|-------------|--|--|-------------|--|--|-------------|--|--|-------------|--|--|-------------|--|--|-------------|--|--|-------------|--|--|-------------|--|--|-------------|--|--|-------------|--|--|-------------|--|--|-------------|--|--|-------------|--|--|-------------|--|--|-------------|--|--|-------------|--|--|-------------|--|--|-------------|--|--|-------------|--|--|-------------|--|--|-------------|--|--|-------------|--|--|-------------|--|--|-------------|--|--|-------------|--|--|-------------|--|--|-------------|--|--|-------------|--|--|-------------|--|--|-------------|--|--|-------------|--|--|-------------|--|--|-------------|--|--|-------------|--|--|-------------|--|--|-------------|--|--|-------------|--|--|-------------|--|--|-------------|--|--|-------------|--|--|-------------|--|--|-------------|--|--|-------------|--|--|-------------|--|--|-------------|--|--|-------------|--|--|-------------|--|--|-------------|--|--|-------------|--|--|-------------|--|--|-------------|--|--|-------------|--|--|-------------|--|--|-------------|--|--|-------------|--|--|-------------|--|--|-------------|--|--|-------------|--|--|-------------|--|--|-------------|--|--|-------------|--|--|-------------|--|--|-------------|--|--|-------------|--|--|-------------|--|--|-------------|--|--|-------------|--|--|-------------|--|--|-------------|--|--|-------------|--|--|-------------|--|--|-------------|--|--|-------------|--|--|-------------|--|--|-------------|--|--|-------------|--|--|-------------|--|--|-------------|--|--|-------------|--|--|-------------|--|--|-------------|--|--|-------------|--|--|-------------|--|--|-------------|--|--|-------------|--|--|-------------|--|--|-------------|--|--|-------------|--|--|-------------|--|--|-------------|--|--|-------------|--|--|-------------|--|--|-------------|--|--|-------------|--|--|-------------|--|--|-------------|--|--|-------------|--|--|-------------|--|--|-------------|--|--|-------------|--|--|-------------|--|--|-------------|--|--|-------------|--|--|-------------|--|--|-------------|--|--|-------------|--|--|-------------|--|--|-------------|--|--|-------------|--|--|-------------|--|--|-------------|--|--|-------------|--|--|-------------|--|--|-------------|--|--|-------------|--|--|-------------|--|--|-------------|--|--|-------------|--|--|-------------|--|--|-------------|--|--|-------------|--|--|-------------|--|--|-------------|--|--|-------------|--|--|-------------|--|--|-------------|--|--|-------------|--|--|-------------|--|--|-------------|--|--|-------------|--|--|-------------|--|--|-------------|--|--|-------------|--|--|-------------|--|--|-------------|--|--|-------------|--|--|-------------|--|--|-------------|--|--|-------------|--|--|-------------|--|--|-------------|--|--|-------------|--|--|-------------|--|--|-------------|--|--|-------------|--|--|-------------|--|--|-------------|--|--|-------------|--|--|-------------|--|--|-------------|--|--|-------------|--|--|-------------|--|--|-------------|--|--|-------------|--|--|-------------|--|--|-------------|--|--|-------------|--|--|-------------|--|--|-------------|--|--|-------------|--|--|-------------|--|--|-------------|--|--|-------------|--|--|-------------|--|--|-------------|--|--|-------------|--|--|-------------|--|--|-------------|--|--|-------------|--|--|-------------|--|--|-------------|--|--|-------------|--|--|-------------|--|--|-------------|--|--|-------------|--|--|-------------|--|--|-------------|--|--|-------------|--|--|-------------|--|--|-------------|--|--|-------------|--|--|-------------|--|--|-------------|--|--|-------------|--|--|-------------|--|--|-------------|--|--|-------------|--|--|-------------|--|--|-------------|--|--|-------------|--|--|-------------|--|--|-------------|--|--|-------------|--|--|-------------|--|--|-------------|--|--|-------------|--|--|-------------|--|--|-------------|--|--|-------------|--|--|-------------|--|--|-------------|--|--|-------------|--|--|-------------|--|--|-------------|--|--|-------------|--|--|-------------|--|--|

File: ESM\_10 (Online Resource 10)

Title: Comparative Multidimensional Molecular Analyses of Pediatric Diffuse Intrinsic Piloic Gliona Reveals Distinct Molecular Subtypes

Journal: Acta Neuropathologica

Authors: Amanda M. Stransky, Madhuri Kumbhakar, Kendall Syffert, Sidicki Yavuzli, Joe Devenney,

Brennan Harmon, Jordan Hall, Eric H. Raabe, Ping An, Melanie Weingart, Brian Reid, Sarah Magee, Roger J. Packer, Javad Nazarian

Corresponding Author:

Javad Nazarian, Children's National Medical Center, Center for Genetic Medicine,

111 Michigan Ave., NW, Washington DC, 20010

Phone: 202-476-6022 Fax: 202-476-6014

Email: J.Nazarian@CNMC.org

| Gene ID | P        | FolChang106 |             |               |             | FolChang109 |             |               |             | FolChang111 |             |               |             | FolChang112 |             |               |               | FolChang121 |             |               |               | FolChang122 |              |                |              | FolChang1347 |              |                |              | FolChang153 |             |               |             | FolChang156 |               |               |             | P(D)     | SS(PD)        | SS(Error)     | (Error)     |          |          |               |             |               |          |               |             |          |          |             |   |
|---------|----------|-------------|-------------|---------------|-------------|-------------|-------------|---------------|-------------|-------------|-------------|---------------|-------------|-------------|-------------|---------------|---------------|-------------|-------------|---------------|---------------|-------------|--------------|----------------|--------------|--------------|--------------|----------------|--------------|-------------|-------------|---------------|-------------|-------------|---------------|---------------|-------------|----------|---------------|---------------|-------------|----------|----------|---------------|-------------|---------------|----------|---------------|-------------|----------|----------|-------------|---|
|         |          | (106 vs. n) | (106 vs. n) | (106 vs. n)   | (106 vs. n) | (109 vs. n) | (109 vs. n) | (109 vs. n)   | (109 vs. n) | (111 vs. n) | (111 vs. n) | (111 vs. n)   | (111 vs. n) | (112 vs. n) | (112 vs. n) | (112 vs. n)   | (112 vs. n)   | (121 vs. n) | (121 vs. n) | (121 vs. n)   | (121 vs. n)   | (122 vs. n) | (122 vs. n)  | (122 vs. n)    | (122 vs. n)  | (1347 vs. n) | (1347 vs. n) | (1347 vs. n)   | (1347 vs. n) | (153 vs. n) | (153 vs. n) | (153 vs. n)   | (153 vs. n) | (156 vs. n) | (156 vs. n)   | (156 vs. n)   | (156 vs. n) |          |               |               |             |          |          |               |             |               |          |               |             |          |          |             |   |
| TC15    | 0        | 0.456431    | -2.89116    | 106 down vs n | 0           | 2.38347     | 2.38347     | 111 up vs n   | 0           | 0.641341    | -1.55923    | 112 down vs n | 2.588       | 42          | 0.934554    | -1.07003      | 121 down vs n | 0           | 0.153065    | -0.50804      | 122 down vs n | 0           | 1.22084      | 1.22084        | 1347 up vs n | 0            | 1.22084      | 1.22084        | 1347 up vs n | 0           | 1.22084     | 1.22084       | 153 up vs n | 0           | 1.22084       | 1.22084       | 156 up vs n | 0        | 1.22084       | 1.22084       | 156 up vs n | 0        | 1.22084  | 1.22084       | 156 up vs n | 0             | 1.22084  | 1.22084       | 156 up vs n | 0        |          |             |   |
| TC16    | 0        | 0.38489     | -3.10213    | 106 down vs n | 0           | 1.8353      | 1.8353      | 111 up vs n   | 0           | 6.39497     | 6.39497     | 112 down vs n | 0           | 0.013857    | -77.6052    | 121 down vs n | 0             | -0.964813   | -1.03647    | 122 down vs n | 0             | 2.3012      | 2.3012       | 1347 up vs n   | 0            | 5.21716      | 5.21716      | 1347 up vs n   | 0            | 5.21716     | 5.21716     | 153 up vs n   | 0           | 5.21716     | 5.21716       | 153 up vs n   | 0           | 5.21716  | 5.21716       | 156 up vs n   | 0           | 5.21716  | 5.21716  | 156 up vs n   | 0           | 5.21716       | 5.21716  | 156 up vs n   | 0           | 5.21716  | 5.21716  | 156 up vs n | 0 |
| TC17    | 0        | 0.320395    | -3.44415    | 106 down vs n | 0           | 0.66919     | 2.68919     | 111 up vs n   | 0           | 1.72296     | 1.72296     | 112 up vs n   | 0           | 0.936186    | -1.06816    | 121 up vs n   | 0             | 0.261388    | -1.82273    | 122 up vs n   | 0             | 1.22285     | 1.22285      | 1347 up vs n   | 0            | 1.22285      | 1.22285      | 1347 up vs n   | 0            | 1.22285     | 1.22285     | 153 up vs n   | 0           | 1.22285     | 1.22285       | 153 up vs n   | 0           | 1.22285  | 1.22285       | 156 up vs n   | 0           | 1.22285  | 1.22285  | 156 up vs n   | 0           | 1.22285       | 1.22285  | 156 up vs n   | 0           | 1.22285  | 1.22285  | 156 up vs n | 0 |
| TC18    | 1.40E-45 | 0.481896    | -2.90088    | 106 down vs n | 2.51        | 1.04086     | 1.04086     | 111 up vs n   | 4.20E-45    | 0.527868    | -1.89507    | 112 down vs n | 0           | 0.513597    | -1.89507    | 121 down vs n | 0             | 0.088621    | -1.12851    | 122 down vs n | 0             | 0.73719     | 0.73719      | 1347 up vs n   | 0            | 0.73719      | 0.73719      | 1347 up vs n   | 0            | 0.73719     | 0.73719     | 153 up vs n   | 0           | 0.73719     | 0.73719       | 153 up vs n   | 0           | 0.73719  | 0.73719       | 156 up vs n   | 0           | 0.73719  | 0.73719  | 156 up vs n   | 0           | 0.73719       | 0.73719  | 156 up vs n   | 0           | 0.73719  | 0.73719  | 156 up vs n | 0 |
| TC19    | 0        | 0.305508    | -0.77799    | 106 down vs n | 0           | 2.25208     | 2.25208     | 111 up vs n   | 0           | 1.64165     | 1.64165     | 112 up vs n   | 0           | 0.594236    | -1.08238    | 121 up vs n   | 0             | 0.125066    | -0.74495    | 122 up vs n   | 0             | 0.411258    | -2.42156     | 1347 up vs n   | 0            | 0.411258     | -2.42156     | 1347 up vs n   | 0            | 0.411258    | -2.42156    | 153 up vs n   | 0           | 0.411258    | -2.42156      | 153 up vs n   | 0           | 0.411258 | -2.42156      | 156 up vs n   | 0           | 0.411258 | -2.42156 | 156 up vs n   | 0           | 0.411258      | -2.42156 | 156 up vs n   | 0           | 0.411258 | -2.42156 | 156 up vs n | 0 |
| TC21A   | 0        | 0.348854    | -2.85833    | 106 down vs n | 0           | 0.84325     | 0.84325     | 111 up vs n   | 0           | 0.30055     | 0.30055     | 112 down vs n | 0           | 0.53199     | 0.3006      | 121 up vs n   | 0             | 0.288623    | -2.5111     | 122 down vs n | 0             | 0.781219    | 0.781219     | 1347 up vs n   | 0            | 0.781219     | 0.781219     | 1347 up vs n   | 0            | 0.781219    | 0.781219    | 153 up vs n   | 0           | 0.781219    | 0.781219      | 153 up vs n   | 0           | 0.781219 | 0.781219      | 156 up vs n   | 0           | 0.781219 | 0.781219 | 156 up vs n   | 0           | 0.781219      | 0.781219 | 156 up vs n   | 0           | 0.781219 | 0.781219 | 156 up vs n | 0 |
| TC21B   | 0        | -1.44481    | 5.14841     | 106 up vs n   | 4.50E-41    | 1.34809     | 1.34809     | 111 up vs n   | 5.61E-45    | -0.239567   | -4.17419    | 112 down vs n | 2.80E-43    | 0.288084    | -3.56019    | 121 down vs n | 9.09E-44      | 0.392166    | -2.54994    | 122 down vs n | 0.652291      | 0.652291    | 1347 up vs n | 0              | 0.652291     | 0.652291     | 1347 up vs n | 0              | 0.652291     | 0.652291    | 153 up vs n | 6.05E-42      | 0.556293    | 1.84665     | 153 down vs n | 1.54E-44      | -0.0952271  | -10.4802 | 156 down vs n | 5.84E-15      | 30.5534     | 4.55E-13 | 1        | 0.556293      | 1.84665     | 156 down vs n | 5.84E-15 | 30.5534       | 4.55E-13    | 1        |          |             |   |
| TC21C   | 0        | -0.709554   | -1.40551    | 106 down vs n | 0           | 9.42085     | 9.42085     | 111 up vs n   | 0           | -2.36167    | -1.92025    | 112 down vs n | 0           | 0.637211    | -1.92025    | 121 down vs n | 0             | 0.664631    | -1.50505    | 122 down vs n | 0             | 1.37026     | 1.37026      | 1347 up vs n   | 0            | 1.37026      | 1.37026      | 1347 up vs n   | 0            | 1.37026     | 1.37026     | 153 up vs n   | 0           | 1.37026     | 1.37026       | 156 up vs n   | 0           | 1.37026  | 1.37026       | 156 up vs n   | 0           | 1.37026  | 1.37026  | 156 up vs n   | 0           | 1.37026       | 1.37026  | 156 up vs n   | 0           | 1.37026  | 1.37026  | 156 up vs n | 0 |
| TC22    | 0        | 0.50145     | -1.10932    | 106 down vs n | 0           | 0.571483    | 1.86957     | 111 down vs n | 0           | -0.571483   | -1.74867    | 112 down vs n | 0           | -0.854493   | -1.74867    | 121 down vs n | 0             | 0.774808    | -1.29054    | 122 down vs n | 0             | 0.554626    | 0.554626     | 1347 down vs n | 0            | 0.554626     | 0.554626     | 1347 down vs n | 0            | 0.554626    | 0.554626    | 153 down vs n | 0           | 0.554626    | 0.554626      | 156 down vs n | 0           | 0.554626 | 0.554626      | 156 down vs n | 0           | 0.554626 | 0.554626 | 156 down vs n | 0           | 0.554626      | 0.554626 | 156 down vs n | 0           |          |          |             |   |
| TC23    | 0        | 0.395303    | -2.52971    | 106 down vs n | 0           | 1.50674     | 1.50674     | 111 up vs n   | 0           | 1.46934     | 1.46934     | 112 up vs n   | 1.40E-45    | 0.744148    | -1.34378    | 121 down vs n | 0             | 0.289197    | -4.85503    | 122 down vs n | 1.23E-44      | 1.1987      | 1.1987       | 1347 up vs n   | 0            | 1.1987       | 1.1987       | 1347 up vs n   | 0            | 1.1987      | 1.1987      | 153 up vs n   | 0           | 1.1987      | 1.1987        | 156 up vs n   | 0           | 1.1987   | 1.1987        | 156 up vs n   | 0           | 1.1987   | 1.1987   | 156 up vs n   | 0           | 1.1987        | 1.1987   | 156 up vs n   | 0           |          |          |             |   |
| TC24    | 0        | 0.284783    | -3.9323     | 106 down vs n | 0           | 1.24067     | 1.24067     | 111 up vs n   | 0           | 1.24067     | 1.24067     | 112 up vs n   | 0           | 0.863554    | -1.1559     | 121 down vs n | 0             | 0.207763    | -1.81319    | 122 down vs n | 0             | 2.55223     | 2.55223      | 1347 up vs n   | 0            | 2.55223      | 2.55223      | 1347 up vs n   | 0            | 2.55223     | 2.55223     | 153 up vs n   | 0           | 2.55223     | 2.55223       | 156 up vs n   | 0           | 2.55223  | 2.55223       | 156 up vs n   | 0           | 2.55223  | 2.55223  | 156 up vs n   | 0           | 2.55223       | 2.55223  | 156 up vs n   | 0           |          |          |             |   |
| TC25    | 0        | 0.284783    | -3.9323     | 106 down vs n | 0           | 1.24067     | 1.24067     | 111 up vs n   | 0           | 1.24067     | 1.24067     | 112 up vs n   | 0           | 0.863554    | -1.1559     | 121 down vs n | 0             | 0.207763    | -1.81319    | 122 down vs n | 0             | 2.55223     | 2.55223      | 1347 up vs n   | 0            | 2.55223      | 2.55223      | 1347 up vs n   | 0            | 2.55223     | 2.55223     | 153 up vs n   | 0           | 2.55223     | 2.55223       | 156 up vs n   | 0           | 2.55223  | 2.55223       | 156 up vs n   | 0           | 2.55223  | 2.55223  | 156 up vs n   | 0           | 2.55223       | 2.55223  | 156 up vs n   | 0           |          |          |             |   |
| TC26    | 0        | -0.052021   | -1.89322    | 106 down vs n | 0           | 4.28979     | 4.28979     | 111 up vs n   | 0           | -1.23699    | 1.23699     | 112 up vs n   | 0           | -0.613224   | -1.63073    | 121 down vs n | 0             | -0.685744   | -1.45827    | 122 down vs n | 0             | 1.61972     | 1.61972      | 1347 up vs n   | 0            | 1.61972      | 1.61972      | 1347 up vs n   | 0            | 1.61972     | 1.61972     | 153 up vs n   | 0           | 1.61972     | 1.61972       | 156 up vs n   | 0           | 1.61972  | 1.61972       | 156 up vs n   | 0           | 1.61972  | 1.61972  | 156 up vs n   | 0           | 1.61972       | 1.61972  | 156 up vs n   | 0           |          |          |             |   |
| TC27    | 0        | 0.196699    | -0.52275    | 106 down vs n | 0           | 1.11        | 1.11        | 111 up vs n   | 0           | 1.05937     | 1.05937     | 112 up vs n   | 0           | 1.61358     | 1.61358     | 121 down vs n | 0             | 0.0705642   | -1.1715     | 122 down vs n | 0             | 7.52633     | 7.52633      | 1347 up vs n   | 0            | 7.52633      | 7.52633      | 1347 up vs n   | 0            | 7.52633     | 7.52633     | 153 up vs n   | 0           | 7.52633     | 7.52633       | 156 up vs n   | 0           | 7.52633  | 7.52633       | 156 up vs n   | 0           | 7.52633  | 7.52633  | 156 up vs n   | 0           | 7.52633       | 7.52633  | 156 up vs n   | 0           |          |          |             |   |
| TC28    | 0        | 0.196699    | -0.52275    | 106 down vs n | 0           | 1.11        | 1.11        | 111 up vs n   | 2.29E-37    | 1.61358     | 1.61358     | 121 down vs n | 0           | 0.0705642   | -1.1715     | 122 down vs n | 0             | 7.52633     | 7.52633     | 1347 up vs n  | 0             | 7.52633     | 7.52633      | 1347 up vs n   | 0            | 7.52633      | 7.52633      | 1347 up vs n   | 0            | 7.52633     | 7.52633     | 153 up vs n   | 0           | 7.52633     | 7.52633       | 156 up vs n   | 0           | 7.52633  | 7.52633       | 156 up vs n   | 0           | 7.52633  | 7.52633  | 156 up vs n   | 0           |               |          |               |             |          |          |             |   |
| TC29    | 0        | 0.302946    | -3.10092    | 106 down vs n | 0           | 3.91886     | 3.91886     | 111 up vs n   | 1.29E-43    | 0.899632    | -1.11317    | 112 down vs n | 0           | 0.782823    | -1.27743    | 121 down vs n | 0             | 0.130955    | -0.76318    | 122 down vs n | 1.68E-44      | 1.13642     | 1.13642      | 1347 up vs n   | 0            | 1.13642      | 1.13642      | 1347 up vs n   | 0            | 1.13642     | 1.13642     | 153 up vs n   | 0           | 1.13642     | 1.13642       | 156 up vs n   | 0           | 1.13642  | 1.13642       | 156 up vs n   | 0           | 1.13642  | 1.13642  | 156 up vs n   | 0           |               |          |               |             |          |          |             |   |
| TC30    | 0        | 0.059283    | -1.86382    | 106 down vs n | 0           | 56.1636     | 56.1636     | 111 up vs n   | 0           | 0.74945     | -1.13431    | 112 down vs n | 0           | 0.250508    | -2.25409    | 121 down vs n | 0             | 0.790508    | -1.26477    | 122 down vs n | 0             | 1.60531     | 1.60531      | 1347 up vs n   | 0            | 1.60531      | 1.60531      | 1347 up vs n   | 0            | 1.60531     | 1.60531     | 153 up vs n   | 0           | 1.60531     | 1.60531       | 156 up vs n   | 0           | 1.60531  | 1.60531       | 156 up vs n   | 0           | 1.60531  | 1.60531  | 156 up vs n   | 0           |               |          |               |             |          |          |             |   |
| TC31    | 0        | 0.151892    | -2.84172    | 106 down vs n | 0           | 0.446574    | 1.54661     | 111 up vs n   | 0           | 0.446574    | 1.54661     | 112 up vs n   | 0           | 0.446574    | 1.54661     | 121 up vs n   | 0             | 0.110547    | -0.94504    | 122 up vs n   | 0             | 1.34604     | 1.34604      | 1347 up vs n   | 0            | 1.34604      | 1.34604      | 1347 up vs n   | 0            | 1.34604     | 1.34604     | 153 up vs n   | 0           | 1.34604     | 1.34604       | 156 up vs n   | 0           | 1.34604  | 1.34604       | 156 up vs n   | 0           | 1.34604  | 1.34604  | 156 up vs n   | 0           |               |          |               |             |          |          |             |   |
| TC32    | 0        | -0.245132   | -0.7009     | 106 down vs n | 0           | 1.44835     | 1.44835     | 111 up vs n   | 1.29E-43    | 0.899632    | -1.11317    | 112 down vs n | 0           | 0.782823    | -1.27743    | 121 down vs n | 0             | 0.130955    | -0.76318    | 122 down vs n | 1.68E-44      | 1.13642     | 1.13642      | 1347 up vs n   | 0            | 1.13642      | 1.13642      | 1347 up vs n   | 0            | 1.13642     | 1.13642     | 153 up vs n   | 0           | 1.13642     | 1.13642       | 156 up vs n   | 0           | 1.13642  | 1.13642       | 156 up vs n   | 0           | 1.13642  | 1.13642  | 156 up vs n   | 0           |               |          |               |             |          |          |             |   |
| TC33    | 0        | 0.216298    | -4.01234    | 106 down vs n | 0           | 1.48189     | 4.01234     | 111 up vs n   | 0           | 0.93713     | -1.26146    | 112 down vs n | 0           | 0.93713     | -1.26146    |               |               |             |             |               |               |             |              |                |              |              |              |                |              |             |             |               |             |             |               |               |             |          |               |               |             |          |          |               |             |               |          |               |             |          |          |             |   |

**Title:** Comparative Multidimensional Molecular Analyses of Pediatric Diffuse Intrinsic Pontine Glioma Reveals Distinct Molecular Subtypes  
**Journal:** Acta Neuropathologica

Javad Nazarian, Children's National Medical Center, Center for Genetic Medicine

Phone: 202-476-6022 Fax: 202-476-6014  
Email: [DMcGowan@CMAA.org](mailto:DMcGowan@CMAA.org)

| n: | FoldChange/10 | n: | FoldChange/111 | n: | FoldChange/111 |
|----|---------------|----|----------------|----|----------------|
| 1  | 1.00          | 1  | 1.00           | 1  | 1.00           |
| 2  | 1.00          | 2  | 1.00           | 2  | 1.00           |
| 3  | 1.00          | 3  | 1.00           | 3  | 1.00           |
| 4  | 1.00          | 4  | 1.00           | 4  | 1.00           |
| 5  | 1.00          | 5  | 1.00           | 5  | 1.00           |
| 6  | 1.00          | 6  | 1.00           | 6  | 1.00           |
| 7  | 1.00          | 7  | 1.00           | 7  | 1.00           |
| 8  | 1.00          | 8  | 1.00           | 8  | 1.00           |
| 9  | 1.00          | 9  | 1.00           | 9  | 1.00           |
| 10 | 1.00          | 10 | 1.00           | 10 | 1.00           |
| 11 | 1.00          | 11 | 1.00           | 11 | 1.00           |
| 12 | 1.00          | 12 | 1.00           | 12 | 1.00           |
| 13 | 1.00          | 13 | 1.00           | 13 | 1.00           |
| 14 | 1.00          | 14 | 1.00           | 14 | 1.00           |
| 15 | 1.00          | 15 | 1.00           | 15 | 1.00           |
| 16 | 1.00          | 16 | 1.00           | 16 | 1.00           |
| 17 | 1.00          | 17 | 1.00           | 17 | 1.00           |
| 18 | 1.00          | 18 | 1.00           | 18 | 1.00           |
| 19 | 1.00          | 19 | 1.00           | 19 | 1.00           |
| 20 | 1.00          | 20 | 1.00           | 20 | 1.00           |
| 21 | 1.00          | 21 | 1.00           | 21 | 1.00           |
| 22 | 1.00          | 22 | 1.00           | 22 | 1.00           |
| 23 | 1.00          | 23 | 1.00           | 23 | 1.00           |
| 24 | 1.00          | 24 | 1.00           | 24 | 1.00           |
| 25 | 1.00          | 25 | 1.00           | 25 | 1.00           |
| 26 | 1.00          | 26 | 1.00           | 26 | 1.00           |
| 27 | 1.00          | 27 | 1.00           | 27 | 1.00           |
| 28 | 1.00          | 28 | 1.00           | 28 | 1.00           |
| 29 | 1.00          | 29 | 1.00           | 29 | 1.00           |
| 30 | 1.00          | 30 | 1.00           | 30 | 1.00           |
| 31 | 1.00          | 31 | 1.00           | 31 | 1.00           |
| 32 | 1.00          | 32 | 1.00           | 32 | 1.00           |
| 33 | 1.00          | 33 | 1.00           | 33 | 1.00           |
| 34 | 1.00          | 34 | 1.00           | 34 | 1.00           |
| 35 | 1.00          | 35 | 1.00           | 35 | 1.00           |
| 36 | 1.00          | 36 | 1.00           | 36 | 1.00           |
| 37 | 1.00          | 37 | 1.00           | 37 | 1.00           |
| 38 | 1.00          | 38 | 1.00           | 38 | 1.00           |
| 39 | 1.00          | 39 | 1.00           | 39 | 1.00           |
| 40 | 1.00          | 40 | 1.00           | 40 | 1.00           |
| 41 | 1.00          | 41 | 1.00           | 41 | 1.00           |
| 42 | 1.00          | 42 | 1.00           | 42 | 1.00           |
| 43 | 1.00          | 43 | 1.00           | 43 | 1.00           |
| 44 | 1.00          | 44 | 1.00           | 44 | 1.00           |
| 45 | 1.00          | 45 | 1.00           | 45 | 1.00           |
| 46 | 1.00          | 46 | 1.00           | 46 | 1.00           |
| 47 | 1.00          | 47 | 1.00           | 47 | 1.00           |
| 48 | 1.00          | 48 | 1.00           | 48 | 1.00           |
| 49 | 1.00          | 49 | 1.00           | 49 | 1.00           |
| 50 | 1.00          | 50 | 1.00           | 50 | 1.00           |
| 51 | 1.00          | 51 | 1.00           | 51 | 1.00           |
| 52 | 1.00          | 52 | 1.00           | 52 | 1.00           |
| 53 | 1.00          | 53 | 1.00           | 53 | 1.00           |
| 54 | 1.00          | 54 | 1.00           | 54 | 1.00           |
| 55 | 1.00          | 55 | 1.00           | 55 | 1.00           |
| 56 | 1.00          | 56 | 1.00           | 56 | 1.00           |
| 57 | 1.00          | 57 | 1.00           | 57 | 1.00           |
| 58 | 1.00          | 58 | 1.00           | 58 | 1.00           |
| 59 | 1.00          | 59 | 1.00           | 59 | 1.00           |
| 60 | 1.00          | 60 | 1.00           | 60 | 1.00           |
| 61 | 1.00          | 61 | 1.00           | 61 | 1.00           |
| 62 | 1.00          | 62 | 1.00           | 62 | 1.00           |
| 63 | 1.00          | 63 | 1.00           | 63 | 1.00           |
| 64 | 1.00          | 64 | 1.00           | 64 | 1.00           |
| 65 | 1.00          | 65 | 1.00           | 65 | 1.00           |
| 66 | 1.00          | 66 | 1.00           | 66 | 1.00           |
| 67 | 1.00          |    |                |    |                |

**Title:** Comparative Multidimensional Molecular Analyses of Pediatric Diffuse Intrinsic Pontine Glioma Reveals Distinct Molecular Subtypes  
**Journal:** Acta Neuropathologica

Javad Nazarian, Children's National Medical Center  
111 Michigan Ave. NW, Washington DC 20010

Email: JNazarian@CNMC.org

**p:**  
value(106, 34, nonBiotic, FoldChange)

[illegible]

Journal: Acta Neuropathologica

Brennan Harmon, Jordan Hall, Eric H. Raabe, Ping An, Melanie

**Corresponding Author:**  
Javad Nazarian, Children's National Medical Center, Center for Genetic Medicine

Phone: 202-476-6022 Fax: 202-476-6014

Email: JNazarian@CNMC.org

[illegible]



**Title:** Comparative Multidimensional Molecular Analyses of Pediatric Diffuse Intrinsic Pontine Glioma Reveals  
**Journal:** Acta Neuropathologica

Brennan Harmon, Jordan Hall, Eric H. Raabe, Ping An, Melanie Weingart, Brian Rood, Suresh Magge, Roger

**Corresponding Author:**  
Jayad Nazarian, Children's National Medical Center, Center for Genetic Medicine

Phone: 202-476-6022 Fax: 202-476-6014

[illegible]









File: ISM\_10 (Online Resource 10)

Title: Comparative Multidimensional Molecular Analyses of Pediatric Diffuse Intrinsic Piloile Glioia Reveals Distinct Molecular Subtypes  
Journal: Acta Neuropathologica

Authors: Amanda M. Stransky, Madhuri Kumbhakar, Kendall Snyder, Sidicki Yavuz, Joe Devenney,

Brennan Harmon, Jordan Hall, Eric H. Raabe, Ping An, Melanie Weingart, Brian Ross, Sarah Magge, Roger J. Packer, Javad Nazarian

Corresponding Author:

Javad Nazarian, Children's National Medical Center, Center for Genetic Medicine,

111 Michigan Ave., NW, Washington DC, 20010

Phone: 202-476-6022 Fax: 202-476-6014

Email: J.Nazarian@CNMC.org

| Gene ID | p-value[106] | FolddChange[106] |  |  | p-value[111] | FolddChange[111] |  |  | p-value[112] | FolddChange[112] |  |  | p-value[121] | FolddChange[121] |  |  | p-value[137] | FolddChange[137] |  |  | p-value[153] | FolddChange[153] |  |  | p-value[165] | FolddChange[165] |  |  | p-value[178] | FolddChange[178] |  |  | p-value[186] | FolddChange[186] |  |  | p-value[199] | FolddChange[199] |  |  | p-value[200] | FolddChange[200] |  |  | p-value[201] | FolddChange[201] |  |  | p-value[202] | FolddChange[202] |  |  | p-value[203] | FolddChange[203] |  |  | p-value[204] | FolddChange[204] |  |  | p-value[205] | FolddChange[205] |  |  | p-value[206] | FolddChange[206] |  |  | p-value[207] | FolddChange[207] |  |  | p-value[208] | FolddChange[208] |  |  | p-value[209] | FolddChange[209] |  |  | p-value[210] | FolddChange[210] |  |  | p-value[211] | FolddChange[211] |  |  | p-value[212] | FolddChange[212] |  |  | p-value[213] | FolddChange[213] |  |  | p-value[214] | FolddChange[214] |  |  | p-value[215] | FolddChange[215] |  |  | p-value[216] | FolddChange[216] |  |  | p-value[217] | FolddChange[217] |  |  | p-value[218] | FolddChange[218] |  |  | p-value[219] | FolddChange[219] |  |  | p-value[220] | FolddChange[220] |  |  | p-value[221] | FolddChange[221] |  |  | p-value[222] | FolddChange[222] |  |  | p-value[223] | FolddChange[223] |  |  | p-value[224] | FolddChange[224] |  |  | p-value[225] | FolddChange[225] |  |  | p-value[226] | FolddChange[226] |  |  | p-value[227] | FolddChange[227] |  |  | p-value[228] | FolddChange[228] |  |  | p-value[229] | FolddChange[229] |  |  | p-value[230] | FolddChange[230] |  |  | p-value[231] | FolddChange[231] |  |  | p-value[232] | FolddChange[232] |  |  | p-value[233] | FolddChange[233] |  |  | p-value[234] | FolddChange[234] |  |  | p-value[235] | FolddChange[235] |  |  | p-value[236] | FolddChange[236] |  |  | p-value[237] | FolddChange[237] |  |  | p-value[238] | FolddChange[238] |  |  | p-value[239] | FolddChange[239] |  |  | p-value[240] | FolddChange[240] |  |  | p-value[241] | FolddChange[241] |  |  | p-value[242] | FolddChange[242] |  |  | p-value[243] | FolddChange[243] |  |  | p-value[244] | FolddChange[244] |  |  | p-value[245] | FolddChange[245] |  |  | p-value[246] | FolddChange[246] |  |  | p-value[247] | FolddChange[247] |  |  | p-value[248] | FolddChange[248] |  |  | p-value[249] | FolddChange[249] |  |  | p-value[250] | FolddChange[250] |  |  | p-value[251] | FolddChange[251] |  |  | p-value[252] | FolddChange[252] |  |  | p-value[253] | FolddChange[253] |  |  | p-value[254] | FolddChange[254] |  |  | p-value[255] | FolddChange[255] |  |  | p-value[256] | FolddChange[256] |  |  | p-value[257] | FolddChange[257] |  |  | p-value[258] | FolddChange[258] |  |  | p-value[259] | FolddChange[259] |  |  | p-value[260] | FolddChange[260] |  |  | p-value[261] | FolddChange[261] |  |  | p-value[262] | FolddChange[262] |  |  | p-value[263] | FolddChange[263] |  |  | p-value[264] | FolddChange[264] |  |  | p-value[265] | FolddChange[265] |  |  | p-value[266] | FolddChange[266] |  |  | p-value[267] | FolddChange[267] |  |  | p-value[268] | FolddChange[268] |  |  | p-value[269] | FolddChange[269] |  |  | p-value[270] | FolddChange[270] |  |  | p-value[271] | FolddChange[271] |  |  | p-value[272] | FolddChange[272] |  |  | p-value[273] | FolddChange[273] |  |  | p-value[274] | FolddChange[274] |  |  | p-value[275] | FolddChange[275] |  |  | p-value[276] | FolddChange[276] |  |  | p-value[277] | FolddChange[277] |  |  | p-value[278] | FolddChange[278] |  |  | p-value[279] | FolddChange[279] |  |  | p-value[280] | FolddChange[280] |  |  | p-value[281] | FolddChange[281] |  |  | p-value[282] | FolddChange[282] |  |  | p-value[283] | FolddChange[283] |  |  | p-value[284] | FolddChange[284] |  |  | p-value[285] | FolddChange[285] |  |  | p-value[286] | FolddChange[286] |  |  | p-value[287] | FolddChange[287] |  |  | p-value[288] | FolddChange[288] |  |  | p-value[289] | FolddChange[289] |  |  | p-value[290] | FolddChange[290] |  |  | p-value[291] | FolddChange[291] |  |  | p-value[292] | FolddChange[292] |  |  | p-value[293] | FolddChange[293] |  |  | p-value[294] | FolddChange[294] |  |  | p-value[295] | FolddChange[295] |  |  | p-value[296] | FolddChange[296] |  |  | p-value[297] | FolddChange[297] |  |  | p-value[298] | FolddChange[298] |  |  | p-value[299] | FolddChange[299] |  |  | p-value[300] | FolddChange[300] |  |  | p-value[301] | FolddChange[301] |  |  | p-value[302] | FolddChange[302] |  |  | p-value[303] | FolddChange[303] |  |  | p-value[304] | FolddChange[304] |  |  | p-value[305] | FolddChange[305] |  |  | p-value[306] | FolddChange[306] |  |  | p-value[307] | FolddChange[307] |  |  | p-value[308] | FolddChange[308] |  |  | p-value[309] | FolddChange[309] |  |  | p-value[310] | FolddChange[310] |  |  | p-value[311] | FolddChange[311] |  |  | p-value[312] | FolddChange[312] |  |  | p-value[313] | FolddChange[313] |  |  | p-value[314] | FolddChange[314] |  |  | p-value[315] | FolddChange[315] |  |  | p-value[316] | FolddChange[316] |  |  | p-value[317] | FolddChange[317] |  |  | p-value[318] | FolddChange[318] |  |  | p-value[319] | FolddChange[319] |  |  | p-value[320] | FolddChange[320] |  |  | p-value[321] | FolddChange[321] |  |  | p-value[322] | FolddChange[322] |  |  | p-value[323] | FolddChange[323] |  |  | p-value[324] | FolddChange[324] |  |  | p-value[325] | FolddChange[325] |  |  | p-value[326] | FolddChange[326] |  |  | p-value[327] | FolddChange[327] |  |  | p-value[328] | FolddChange[328] |  |  | p-value[329] | FolddChange[329] |  |  | p-value[330] | FolddChange[330] |  |  | p-value[331] | FolddChange[331] |  |  | p-value[332] | FolddChange[332] |  |  | p-value[333] | FolddChange[333] |  |  | p-value[334] | FolddChange[334] |  |  | p-value[335] | FolddChange[335] |  |  | p-value[336] | FolddChange[336] |  |  | p-value[337] | FolddChange[337] |  |  | p-value[338] | FolddChange[338] |  |  | p-value[339] | FolddChange[339] |  |  | p-value[340] | FolddChange[340] |  |  | p-value[341] | FolddChange[341] |  |  | p-value[342] | FolddChange[342] |  |  | p-value[343] | FolddChange[343] |  |  | p-value[344] | FolddChange[344] |  |  | p-value[345] | FolddChange[345] |  |  | p-value[346] | FolddChange[346] |  |  | p-value[347] | FolddChange[347] |  |  | p-value[348] | FolddChange[348] |  |  | p-value[349] | FolddChange[349] |  |  | p-value[350] | FolddChange[350] |  |  | p-value[351] | FolddChange[351] |  |  | p-value[352] | FolddChange[352] |  |  | p-value[353] | FolddChange[353] |  |  | p-value[354] | FolddChange[354] |  |  | p-value[355] | FolddChange[355] |  |  | p-value[356] | FolddChange[356] |  |  | p-value[357] | FolddChange[357] |  |  | p-value[358] | FolddChange[358] |  |  | p-value[359] | FolddChange[359] |  |  | p-value[360] | FolddChange[360] |  |  | p-value[361] | FolddChange[361] |  |  | p-value[362] | FolddChange[362] |  |  | p-value[363] | FolddChange[363] |  |  | p-value[364] | FolddChange[364] |  |  | p-value[365] | FolddChange[365] |  |  | p-value[366] | FolddChange[366] |  |  | p-value[367] | FolddChange[367] |  |  | p-value[368] | FolddChange[368] |  |  | p-value[369] | FolddChange[369] |  |  | p-value[370] | FolddChange[370] |  |  | p-value[371] | FolddChange[371] |  |  | p-value[372] | FolddChange[372] |  |  | p-value[373] | FolddChange[373] |  |  | p-value[374] | FolddChange[374] |  |  | p-value[375] | FolddChange[375] |  |  | p-value[376] | FolddChange[376] |  |  | p-value[377] | FolddChange[377] |  |  | p-value[378] | FolddChange[378] |  |  | p-value[379] | FolddChange[379] |  |  | p-value[380] | FolddChange[380] |  |  | p-value[381] | FolddChange[381] |  |  | p-value[382] | FolddChange[382] |  |  | p-value[383] | FolddChange[383] |  |  | p-value[384] | FolddChange[384] |  |  | p-value[385] | FolddChange[385] |  |  | p-value[386] | FolddChange[386] |  |  | p-value[387] | FolddChange[387] |  |  | p-value[388] | FolddChange[388] |  |  | p-value[389] | FolddChange[389] |  |  | p-value[390] | FolddChange[390] |  |  | p-value[391] | FolddChange[391] |  |  | p-value[392] | FolddChange[392] |  |  | p-value[393] | FolddChange[393] |  |  | p-value[394] | FolddChange[394] |  |  | p-value[395] | FolddChange[395] |  |  | p-value[396] | FolddChange[396] |  |  | p-value[397] | FolddChange[397] |  |  | p-value[398] | FolddChange[398] |  |  | p-value[399] | FolddChange[399] |  |  | p-value[400] | FolddChange[400] |  |  | p-value[401] | FolddChange[401] |  |  | p-value[402] | FolddChange[402] |  |  | p-value[403] | FolddChange[403] |  |  | p-value[404] | FolddChange[404] |  |  | p-value[405] | FolddChange[405] |  |  | p-value[406] | FolddChange[406] |  |  | p-value[407] | FolddChange[407] |  |  | p-value[408] | FolddChange[408] |  |  | p-value[409] | FolddChange[409] |  |  | p-value[410] | FolddChange[410] |  |  | p-value[411] | FolddChange[411] |  |  | p-value[412] | FolddChange[412] |  |  | p-value[413] | FolddChange[413] |  |  | p-value[414] | FolddChange[414] |  |  | p-value[415] | FolddChange[415] |  |  | p-value[416] | FolddChange[416] |  |  | p-value[417] | FolddChange[417] |  |  | p-value[418] | FolddChange[418] |  |  | p-value[419] | FolddChange[419] |  |  | p-value[420] | FolddChange[420] |  |  | p-value[421] | FolddChange[421] |  |  | p-value[422] | FolddChange[422] |  |  | p-value[423] | FolddChange[423] |  |  | p-value[424] | FolddChange[424] |  |  | p-value[425] | FolddChange[425] |  |  | p-value[426] | FolddChange[426] |  |  | p-value[427] | FolddChange[427] |  |  | p-value[428] | FolddChange[428] |  |  | p-value[429] | FolddChange[429] |  |  | p-value[430] | FolddChange[430] |  |  | p-value[431] | FolddChange[431] |  |  | p-value[432] | FolddChange[432] |  |  | p-value[433] | FolddChange[433] |  |  | p-value[434] | FolddChange[434] |  |  | p-value[435] | FolddChange[435] |  |  | p-value[436] | FolddChange[436] |  |  | p-value[437] | FolddChange[437] |  |  | p-value[438] | FolddChange[438] |  |  | p-value[439] | FolddChange[439] |  |  | p-value[440] | FolddChange[440] |  |  | p-value[441] | FolddChange[441] |  |  | p-value[442] | FolddChange[442] |  |  | p-value[443] | FolddChange[443] |  |  | p-value[444] | FolddChange[444] |  |  | p-value[445] | FolddChange[445] |  |  | p-value[446] | FolddChange[446] |  |  | p-value[447] | FolddChange[447] |  |  | p-value[448] | FolddChange[448] |  |  | p-value[449] | FolddChange[449] |  |  | p-value[450] | FolddChange[450] |  |  | p-value[451] | FolddChange[451] |  |  | p-value[452] | FolddChange[452] |  |  | p-value[453] | FolddChange[453] |  |  | p-value[454] | FolddChange[454] |  |  | p-value[455] | FolddChange[455] |  |  | p-value[456] | FolddChange[456] |  |  | p-value[457] | FolddChange[457] |  |  | p-value[458] | FolddChange[458] |  |  | p-value[459] | FolddChange[459] |  |  | p-value[460] | FolddChange[460] |  |  | p-value[461] | FolddChange[461] |  |  | p-value[462] | FolddChange[462] |  |  | p-value[463] | FolddChange[463] |  |  | p-value[464] | FolddChange[464] |  |  | p-value[465] | FolddChange[465] |  |  | p-value[466] | FolddChange[466] |  |  | p-value[467] | FolddChange[467] |  |  | p-value[468] | FolddChange[468] |  |  | p-value[469] | FolddChange[469] |  |  | p-value[470] | FolddChange[470] |  |  | p-value[471] | FolddChange[471] |  |  | p-value[472] | FolddChange[472] |  |  | p-value[473] | FolddChange[473] |  |  | p-value[474] | FolddChange[474] |  |  | p-value[475] | FolddChange[475] |  |  | p-value[476] | FolddChange[476] |  |  | p-value[477] | FolddChange[477] |  |  | p-value[478] | FolddChange[478] |  |  | p-value[479] | FolddChange[479] |  |  | p-value[480] | FolddChange[480] |  |  | p-value[481] | FolddChange[481] |  |  | p-value[482] | FolddChange[482] |  |  | p-value[483] | FolddChange[483] |  |  | p-value[484] | FolddChange[484] |  |  | p-value[485] | FolddChange[485] |  |  | p-value[486] | FolddChange[486] |  |  | p-value[487] | FolddChange[487] |  |  | p-value[488] | FolddChange[488] |  |  | p-value[489] | FolddChange[489] |  |  | p-value[490] | FolddChange[490] |  |  | p-value[491] | FolddChange[491] |  |  | p-value[492] | FolddChange[492] |  |  | p-value[493] | FolddChange[493] |  |  | p-value[494] | FolddChange[494] |  |  | p-value[495] | FolddChange[495] |  |  | p-value[496] | FolddChange[496] |  |  | p-value[497] | FolddChange[497] |  |  | p-value[498] | FolddChange[498] |  |  | p-value[499] | FolddChange[499] |  |  | p-value[500] | FolddChange[500] |  |  | p-value[501] | FolddChange[501] |  |  | p-value[502] | FolddChange[502] |  |  | p-value[503] | FolddChange[503] |  |  | p-value[504] | FolddChange[504] |  |  | p-value[505] | FolddChange[505] |  |  | p-value[506] | FolddChange[506] |  |  | p-value[507] | FolddChange[507] |  |  | p-value[508] | FolddChange[508] |  |  | p-value[509] | FolddChange[509] |  |  | p-value[510] | FolddChange[510] |  |  | p-value[511] | FolddChange[511] |  |  | p-value[512] | FolddChange[512] |  |  | p-value[513] | FolddChange[513] |  |  | p-value[514] | FolddChange[514] |  |  | p-value[515] | FolddChange[515] |  |  | p-value[516] | FolddChange[516] |  |  | p-value[517] | FolddChange[517] |  |  | p-value[518] | FolddChange[518] |  |  | p-value[519] | FolddChange[519] |  |  | p-value[520] | FolddChange[520] |  |  | p-value[521] | FolddChange[521] |  |  | p-value[522] | FolddChange[522] |  |  | p-value[523] | FolddChange[523] |  |  | p-value[524] | FolddChange[524] |  |  | p-value[525] | FolddChange[525] |  |  | p-value[526] | FolddChange[526] |  |  | p-value[527] | FolddChange[527] |  |  | p-value[528] | FolddChange[528] |  |  | p-value[529] | FolddChange[529] |  |  | p-value[530] | FolddChange[530] |  |  | p-value[531] | FolddChange[531] |  |  | p-value[532] | FolddChange[532] |  |  | p-value[533] | FolddChange[533] |  |  | p-value[534] | FolddChange[534] |  |  | p-value[535] | FolddChange[535] |  |  | p-value[536] | FolddChange[536] |  |  | p-value[537] | FolddChange[537] |  |  | p-value[538] | FolddChange[538] |  |  | p-value[539] | FolddChange[539] |  |  | p-value[540] | FolddChange[540] |  |  | p-value[541] | FolddChange[541] |  |  | p-value[542] | FolddChange[542] |  |  | p-value[543] | FolddChange[543] |  |  | p-value[544] | FolddChange[544] |  |  | p-value[545] | FolddChange[545] |  |  | p-value[546] | FolddChange[546] |  |  | p-value[547] | FolddChange[547] |  |  | p-value[548] | FolddChange[548] |  |  | p-value[549] | FolddChange[549] |  |  | p-value[550] | FolddChange[550] |  |  | p-value[551] | FolddChange[551] |  |  | p-value[552] | FolddChange[552] |  |  | p-value[553] | FolddChange[553] |  |  | p-value[554] | FolddChange[554] |  |  | p-value[555] | FolddChange[555] |  |  | p-value[556] | FolddChange[556] |  |  | p-value[557] | FolddChange[557] |  |  | p-value[558] | FolddChange[558] |  |  | p-value[559] | FolddChange[559] |  |  | p-value[560] | FolddChange[560] |  |  | p-value[561] | FolddChange[561] |  |  | p-value[562] | FolddChange[562] |  |  | p-value[563] | FolddChange[563] |  |  | p-value[564] | FolddChange[564] |  |  | p-value[565] | FolddChange[565] |  |  | p-value[566] | FolddChange[566] |  |  | p-value[567] | FolddChange[567] |  |  | p-value[568] | FolddChange[568] |  |  | p-value[569] | FolddChange[569] |  |  | p-value[570] | FolddChange[570] |  |  | p-value[571] | FolddChange[571] |  |  | p-value[572] | FolddChange[572] |  |  | p-value[573] | FolddChange[573] |  |  | p-value[574] | FolddChange[574] |  |  | p-value[575] | FolddChange[575] |  |  | p-value[576] | FolddChange[576] |  |  | p-value[577] | FolddChange[577] |  |  | p-value[578] | FolddChange[578] |  |  | p-value[579] | FolddChange[579] |  |  | p-value[580] | FolddChange[580] |  |  | p-value[581] | FolddChange[581] |  |  | p-value[582] | FolddChange[582] |  |  | p-value[583] | FolddChange[583] |  |  | p-value[584] | FolddChange[584] |  |  | p-value[585] | FolddChange[585] |  |  | p-value[586] | FolddChange[586] |  |  | p-value[587] | FolddChange[587] |  |  | p-value[588] | FolddChange[588] |  |  | p-value[589] | FolddChange[589] |  |  | p-value[590] | FolddChange[590] |  |  | p-value[591] | FolddChange[591] |  |  | p-value[592] | FolddChange[592] |  |  | p-value[593] | FolddChange[593] |  |  | p-value[594] | FolddChange[594] |  |  | p-value[595] | FolddChange[595] |  |  | p-value[596] | FolddChange[596] |  |  | p-value[597] | FolddChange[597] |  |  | p-value[598] | FolddChange[598] |  |  | p-value[599] | FolddChange[599] |  |  | p-value[600] | FolddChange[600] |  |  | p-value[601] | FolddChange[601] |  |  | p-value[60 |
|---------|--------------|------------------|--|--|--------------|------------------|--|--|--------------|------------------|--|--|--------------|------------------|--|--|--------------|------------------|--|--|--------------|------------------|--|--|--------------|------------------|--|--|--------------|------------------|--|--|--------------|------------------|--|--|--------------|------------------|--|--|--------------|------------------|--|--|--------------|------------------|--|--|--------------|------------------|--|--|--------------|------------------|--|--|--------------|------------------|--|--|--------------|------------------|--|--|--------------|------------------|--|--|--------------|------------------|--|--|--------------|------------------|--|--|--------------|------------------|--|--|--------------|------------------|--|--|--------------|------------------|--|--|--------------|------------------|--|--|--------------|------------------|--|--|--------------|------------------|--|--|--------------|------------------|--|--|--------------|------------------|--|--|--------------|------------------|--|--|--------------|------------------|--|--|--------------|------------------|--|--|--------------|------------------|--|--|--------------|------------------|--|--|--------------|------------------|--|--|--------------|------------------|--|--|--------------|------------------|--|--|--------------|------------------|--|--|--------------|------------------|--|--|--------------|------------------|--|--|--------------|------------------|--|--|--------------|------------------|--|--|--------------|------------------|--|--|--------------|------------------|--|--|--------------|------------------|--|--|--------------|------------------|--|--|--------------|------------------|--|--|--------------|------------------|--|--|--------------|------------------|--|--|--------------|------------------|--|--|--------------|------------------|--|--|--------------|------------------|--|--|--------------|------------------|--|--|--------------|------------------|--|--|--------------|------------------|--|--|--------------|------------------|--|--|--------------|------------------|--|--|--------------|------------------|--|--|--------------|------------------|--|--|--------------|------------------|--|--|--------------|------------------|--|--|--------------|------------------|--|--|--------------|------------------|--|--|--------------|------------------|--|--|--------------|------------------|--|--|--------------|------------------|--|--|--------------|------------------|--|--|--------------|------------------|--|--|--------------|------------------|--|--|--------------|------------------|--|--|--------------|------------------|--|--|--------------|------------------|--|--|--------------|------------------|--|--|--------------|------------------|--|--|--------------|------------------|--|--|--------------|------------------|--|--|--------------|------------------|--|--|--------------|------------------|--|--|--------------|------------------|--|--|--------------|------------------|--|--|--------------|------------------|--|--|--------------|------------------|--|--|--------------|------------------|--|--|--------------|------------------|--|--|--------------|------------------|--|--|--------------|------------------|--|--|--------------|------------------|--|--|--------------|------------------|--|--|--------------|------------------|--|--|--------------|------------------|--|--|--------------|------------------|--|--|--------------|------------------|--|--|--------------|------------------|--|--|--------------|------------------|--|--|--------------|------------------|--|--|--------------|------------------|--|--|--------------|------------------|--|--|--------------|------------------|--|--|--------------|------------------|--|--|--------------|------------------|--|--|--------------|------------------|--|--|--------------|------------------|--|--|--------------|------------------|--|--|--------------|------------------|--|--|--------------|------------------|--|--|--------------|------------------|--|--|--------------|------------------|--|--|--------------|------------------|--|--|--------------|------------------|--|--|--------------|------------------|--|--|--------------|------------------|--|--|--------------|------------------|--|--|--------------|------------------|--|--|--------------|------------------|--|--|--------------|------------------|--|--|--------------|------------------|--|--|--------------|------------------|--|--|--------------|------------------|--|--|--------------|------------------|--|--|--------------|------------------|--|--|--------------|------------------|--|--|--------------|------------------|--|--|--------------|------------------|--|--|--------------|------------------|--|--|--------------|------------------|--|--|--------------|------------------|--|--|--------------|------------------|--|--|--------------|------------------|--|--|--------------|------------------|--|--|--------------|------------------|--|--|--------------|------------------|--|--|--------------|------------------|--|--|--------------|------------------|--|--|--------------|------------------|--|--|--------------|------------------|--|--|--------------|------------------|--|--|--------------|------------------|--|--|--------------|------------------|--|--|--------------|------------------|--|--|--------------|------------------|--|--|--------------|------------------|--|--|--------------|------------------|--|--|--------------|------------------|--|--|--------------|------------------|--|--|--------------|------------------|--|--|--------------|------------------|--|--|--------------|------------------|--|--|--------------|------------------|--|--|--------------|------------------|--|--|--------------|------------------|--|--|--------------|------------------|--|--|--------------|------------------|--|--|--------------|------------------|--|--|--------------|------------------|--|--|--------------|------------------|--|--|--------------|------------------|--|--|--------------|------------------|--|--|--------------|------------------|--|--|--------------|------------------|--|--|--------------|------------------|--|--|--------------|------------------|--|--|--------------|------------------|--|--|--------------|------------------|--|--|--------------|------------------|--|--|--------------|------------------|--|--|--------------|------------------|--|--|--------------|------------------|--|--|--------------|------------------|--|--|--------------|------------------|--|--|--------------|------------------|--|--|--------------|------------------|--|--|--------------|------------------|--|--|--------------|------------------|--|--|--------------|------------------|--|--|--------------|------------------|--|--|--------------|------------------|--|--|--------------|------------------|--|--|--------------|------------------|--|--|--------------|------------------|--|--|--------------|------------------|--|--|--------------|------------------|--|--|--------------|------------------|--|--|--------------|------------------|--|--|--------------|------------------|--|--|--------------|------------------|--|--|--------------|------------------|--|--|--------------|------------------|--|--|--------------|------------------|--|--|--------------|------------------|--|--|--------------|------------------|--|--|--------------|------------------|--|--|--------------|------------------|--|--|--------------|------------------|--|--|--------------|------------------|--|--|--------------|------------------|--|--|--------------|------------------|--|--|--------------|------------------|--|--|--------------|------------------|--|--|--------------|------------------|--|--|--------------|------------------|--|--|--------------|------------------|--|--|--------------|------------------|--|--|--------------|------------------|--|--|--------------|------------------|--|--|--------------|------------------|--|--|--------------|------------------|--|--|--------------|------------------|--|--|--------------|------------------|--|--|--------------|------------------|--|--|--------------|------------------|--|--|--------------|------------------|--|--|--------------|------------------|--|--|--------------|------------------|--|--|--------------|------------------|--|--|--------------|------------------|--|--|--------------|------------------|--|--|--------------|------------------|--|--|--------------|------------------|--|--|--------------|------------------|--|--|--------------|------------------|--|--|--------------|------------------|--|--|--------------|------------------|--|--|--------------|------------------|--|--|--------------|------------------|--|--|--------------|------------------|--|--|--------------|------------------|--|--|--------------|------------------|--|--|--------------|------------------|--|--|--------------|------------------|--|--|--------------|------------------|--|--|--------------|------------------|--|--|--------------|------------------|--|--|--------------|------------------|--|--|--------------|------------------|--|--|--------------|------------------|--|--|--------------|------------------|--|--|--------------|------------------|--|--|--------------|------------------|--|--|--------------|------------------|--|--|--------------|------------------|--|--|--------------|------------------|--|--|--------------|------------------|--|--|--------------|------------------|--|--|--------------|------------------|--|--|--------------|------------------|--|--|--------------|------------------|--|--|--------------|------------------|--|--|--------------|------------------|--|--|--------------|------------------|--|--|--------------|------------------|--|--|--------------|------------------|--|--|--------------|------------------|--|--|--------------|------------------|--|--|--------------|------------------|--|--|--------------|------------------|--|--|--------------|------------------|--|--|--------------|------------------|--|--|--------------|------------------|--|--|--------------|------------------|--|--|--------------|------------------|--|--|--------------|------------------|--|--|--------------|------------------|--|--|--------------|------------------|--|--|--------------|------------------|--|--|--------------|------------------|--|--|--------------|------------------|--|--|--------------|------------------|--|--|--------------|------------------|--|--|--------------|------------------|--|--|--------------|------------------|--|--|--------------|------------------|--|--|--------------|------------------|--|--|--------------|------------------|--|--|--------------|------------------|--|--|--------------|------------------|--|--|--------------|------------------|--|--|--------------|------------------|--|--|--------------|------------------|--|--|--------------|------------------|--|--|--------------|------------------|--|--|--------------|------------------|--|--|--------------|------------------|--|--|--------------|------------------|--|--|--------------|------------------|--|--|--------------|------------------|--|--|--------------|------------------|--|--|--------------|------------------|--|--|--------------|------------------|--|--|--------------|------------------|--|--|--------------|------------------|--|--|--------------|------------------|--|--|--------------|------------------|--|--|--------------|------------------|--|--|--------------|------------------|--|--|--------------|------------------|--|--|--------------|------------------|--|--|--------------|------------------|--|--|--------------|------------------|--|--|--------------|------------------|--|--|--------------|------------------|--|--|--------------|------------------|--|--|--------------|------------------|--|--|--------------|------------------|--|--|--------------|------------------|--|--|--------------|------------------|--|--|--------------|------------------|--|--|--------------|------------------|--|--|--------------|------------------|--|--|--------------|------------------|--|--|--------------|------------------|--|--|--------------|------------------|--|--|--------------|------------------|--|--|--------------|------------------|--|--|--------------|------------------|--|--|--------------|------------------|--|--|--------------|------------------|--|--|--------------|------------------|--|--|--------------|------------------|--|--|--------------|------------------|--|--|--------------|------------------|--|--|--------------|------------------|--|--|--------------|------------------|--|--|--------------|------------------|--|--|--------------|------------------|--|--|--------------|------------------|--|--|--------------|------------------|--|--|--------------|------------------|--|--|--------------|------------------|--|--|--------------|------------------|--|--|--------------|------------------|--|--|--------------|------------------|--|--|--------------|------------------|--|--|--------------|------------------|--|--|--------------|------------------|--|--|--------------|------------------|--|--|--------------|------------------|--|--|--------------|------------------|--|--|--------------|------------------|--|--|--------------|------------------|--|--|--------------|------------------|--|--|--------------|------------------|--|--|--------------|------------------|--|--|--------------|------------------|--|--|--------------|------------------|--|--|--------------|------------------|--|--|--------------|------------------|--|--|--------------|------------------|--|--|--------------|------------------|--|--|--------------|------------------|--|--|--------------|------------------|--|--|--------------|------------------|--|--|--------------|------------------|--|--|--------------|------------------|--|--|--------------|------------------|--|--|--------------|------------------|--|--|--------------|------------------|--|--|--------------|------------------|--|--|--------------|------------------|--|--|--------------|------------------|--|--|--------------|------------------|--|--|--------------|------------------|--|--|--------------|------------------|--|--|--------------|------------------|--|--|--------------|------------------|--|--|--------------|------------------|--|--|--------------|------------------|--|--|--------------|------------------|--|--|--------------|------------------|--|--|--------------|------------------|--|--|--------------|------------------|--|--|--------------|------------------|--|--|--------------|------------------|--|--|--------------|------------------|--|--|--------------|------------------|--|--|--------------|------------------|--|--|--------------|------------------|--|--|--------------|------------------|--|--|--------------|------------------|--|--|--------------|------------------|--|--|--------------|------------------|--|--|--------------|------------------|--|--|--------------|------------------|--|--|--------------|------------------|--|--|--------------|------------------|--|--|--------------|------------------|--|--|--------------|------------------|--|--|--------------|------------------|--|--|--------------|------------------|--|--|--------------|------------------|--|--|--------------|------------------|--|--|--------------|------------------|--|--|--------------|------------------|--|--|--------------|------------------|--|--|--------------|------------------|--|--|--------------|------------------|--|--|--------------|------------------|--|--|--------------|------------------|--|--|--------------|------------------|--|--|--------------|------------------|--|--|--------------|------------------|--|--|--------------|------------------|--|--|--------------|------------------|--|--|--------------|------------------|--|--|--------------|------------------|--|--|--------------|------------------|--|--|--------------|------------------|--|--|--------------|------------------|--|--|--------------|------------------|--|--|--------------|------------------|--|--|--------------|------------------|--|--|--------------|------------------|--|--|--------------|------------------|--|--|--------------|------------------|--|--|--------------|------------------|--|--|------------|
|---------|--------------|------------------|--|--|--------------|------------------|--|--|--------------|------------------|--|--|--------------|------------------|--|--|--------------|------------------|--|--|--------------|------------------|--|--|--------------|------------------|--|--|--------------|------------------|--|--|--------------|------------------|--|--|--------------|------------------|--|--|--------------|------------------|--|--|--------------|------------------|--|--|--------------|------------------|--|--|--------------|------------------|--|--|--------------|------------------|--|--|--------------|------------------|--|--|--------------|------------------|--|--|--------------|------------------|--|--|--------------|------------------|--|--|--------------|------------------|--|--|--------------|------------------|--|--|--------------|------------------|--|--|--------------|------------------|--|--|--------------|------------------|--|--|--------------|------------------|--|--|--------------|------------------|--|--|--------------|------------------|--|--|--------------|------------------|--|--|--------------|------------------|--|--|--------------|------------------|--|--|--------------|------------------|--|--|--------------|------------------|--|--|--------------|------------------|--|--|--------------|------------------|--|--|--------------|------------------|--|--|--------------|------------------|--|--|--------------|------------------|--|--|--------------|------------------|--|--|--------------|------------------|--|--|--------------|------------------|--|--|--------------|------------------|--|--|--------------|------------------|--|--|--------------|------------------|--|--|--------------|------------------|--|--|--------------|------------------|--|--|--------------|------------------|--|--|--------------|------------------|--|--|--------------|------------------|--|--|--------------|------------------|--|--|--------------|------------------|--|--|--------------|------------------|--|--|--------------|------------------|--|--|--------------|------------------|--|--|--------------|------------------|--|--|--------------|------------------|--|--|--------------|------------------|--|--|--------------|------------------|--|--|--------------|------------------|--|--|--------------|------------------|--|--|--------------|------------------|--|--|--------------|------------------|--|--|--------------|------------------|--|--|--------------|------------------|--|--|--------------|------------------|--|--|--------------|------------------|--|--|--------------|------------------|--|--|--------------|------------------|--|--|--------------|------------------|--|--|--------------|------------------|--|--|--------------|------------------|--|--|--------------|------------------|--|--|--------------|------------------|--|--|--------------|------------------|--|--|--------------|------------------|--|--|--------------|------------------|--|--|--------------|------------------|--|--|--------------|------------------|--|--|--------------|------------------|--|--|--------------|------------------|--|--|--------------|------------------|--|--|--------------|------------------|--|--|--------------|------------------|--|--|--------------|------------------|--|--|--------------|------------------|--|--|--------------|------------------|--|--|--------------|------------------|--|--|--------------|------------------|--|--|--------------|------------------|--|--|--------------|------------------|--|--|--------------|------------------|--|--|--------------|------------------|--|--|--------------|------------------|--|--|--------------|------------------|--|--|--------------|------------------|--|--|--------------|------------------|--|--|--------------|------------------|--|--|--------------|------------------|--|--|--------------|------------------|--|--|--------------|------------------|--|--|--------------|------------------|--|--|--------------|------------------|--|--|--------------|------------------|--|--|--------------|------------------|--|--|--------------|------------------|--|--|--------------|------------------|--|--|--------------|------------------|--|--|--------------|------------------|--|--|--------------|------------------|--|--|--------------|------------------|--|--|--------------|------------------|--|--|--------------|------------------|--|--|--------------|------------------|--|--|--------------|------------------|--|--|--------------|------------------|--|--|--------------|------------------|--|--|--------------|------------------|--|--|--------------|------------------|--|--|--------------|------------------|--|--|--------------|------------------|--|--|--------------|------------------|--|--|--------------|------------------|--|--|--------------|------------------|--|--|--------------|------------------|--|--|--------------|------------------|--|--|--------------|------------------|--|--|--------------|------------------|--|--|--------------|------------------|--|--|--------------|------------------|--|--|--------------|------------------|--|--|--------------|------------------|--|--|--------------|------------------|--|--|--------------|------------------|--|--|--------------|------------------|--|--|--------------|------------------|--|--|--------------|------------------|--|--|--------------|------------------|--|--|--------------|------------------|--|--|--------------|------------------|--|--|--------------|------------------|--|--|--------------|------------------|--|--|--------------|------------------|--|--|--------------|------------------|--|--|--------------|------------------|--|--|--------------|------------------|--|--|--------------|------------------|--|--|--------------|------------------|--|--|--------------|------------------|--|--|--------------|------------------|--|--|--------------|------------------|--|--|--------------|------------------|--|--|--------------|------------------|--|--|--------------|------------------|--|--|--------------|------------------|--|--|--------------|------------------|--|--|--------------|------------------|--|--|--------------|------------------|--|--|--------------|------------------|--|--|--------------|------------------|--|--|--------------|------------------|--|--|--------------|------------------|--|--|--------------|------------------|--|--|--------------|------------------|--|--|--------------|------------------|--|--|--------------|------------------|--|--|--------------|------------------|--|--|--------------|------------------|--|--|--------------|------------------|--|--|--------------|------------------|--|--|--------------|------------------|--|--|--------------|------------------|--|--|--------------|------------------|--|--|--------------|------------------|--|--|--------------|------------------|--|--|--------------|------------------|--|--|--------------|------------------|--|--|--------------|------------------|--|--|--------------|------------------|--|--|--------------|------------------|--|--|--------------|------------------|--|--|--------------|------------------|--|--|--------------|------------------|--|--|--------------|------------------|--|--|--------------|------------------|--|--|--------------|------------------|--|--|--------------|------------------|--|--|--------------|------------------|--|--|--------------|------------------|--|--|--------------|------------------|--|--|--------------|------------------|--|--|--------------|------------------|--|--|--------------|------------------|--|--|--------------|------------------|--|--|--------------|------------------|--|--|--------------|------------------|--|--|--------------|------------------|--|--|--------------|------------------|--|--|--------------|------------------|--|--|--------------|------------------|--|--|--------------|------------------|--|--|--------------|------------------|--|--|--------------|------------------|--|--|--------------|------------------|--|--|--------------|------------------|--|--|--------------|------------------|--|--|--------------|------------------|--|--|--------------|------------------|--|--|--------------|------------------|--|--|--------------|------------------|--|--|--------------|------------------|--|--|--------------|------------------|--|--|--------------|------------------|--|--|--------------|------------------|--|--|--------------|------------------|--|--|--------------|------------------|--|--|--------------|------------------|--|--|--------------|------------------|--|--|--------------|------------------|--|--|--------------|------------------|--|--|--------------|------------------|--|--|--------------|------------------|--|--|--------------|------------------|--|--|--------------|------------------|--|--|--------------|------------------|--|--|--------------|------------------|--|--|--------------|------------------|--|--|--------------|------------------|--|--|--------------|------------------|--|--|--------------|------------------|--|--|--------------|------------------|--|--|--------------|------------------|--|--|--------------|------------------|--|--|--------------|------------------|--|--|--------------|------------------|--|--|--------------|------------------|--|--|--------------|------------------|--|--|--------------|------------------|--|--|--------------|------------------|--|--|--------------|------------------|--|--|--------------|------------------|--|--|--------------|------------------|--|--|--------------|------------------|--|--|--------------|------------------|--|--|--------------|------------------|--|--|--------------|------------------|--|--|--------------|------------------|--|--|--------------|------------------|--|--|--------------|------------------|--|--|--------------|------------------|--|--|--------------|------------------|--|--|--------------|------------------|--|--|--------------|------------------|--|--|--------------|------------------|--|--|--------------|------------------|--|--|--------------|------------------|--|--|--------------|------------------|--|--|--------------|------------------|--|--|--------------|------------------|--|--|--------------|------------------|--|--|--------------|------------------|--|--|--------------|------------------|--|--|--------------|------------------|--|--|--------------|------------------|--|--|--------------|------------------|--|--|--------------|------------------|--|--|--------------|------------------|--|--|--------------|------------------|--|--|--------------|------------------|--|--|--------------|------------------|--|--|--------------|------------------|--|--|--------------|------------------|--|--|--------------|------------------|--|--|--------------|------------------|--|--|--------------|------------------|--|--|--------------|------------------|--|--|--------------|------------------|--|--|--------------|------------------|--|--|--------------|------------------|--|--|--------------|------------------|--|--|--------------|------------------|--|--|--------------|------------------|--|--|--------------|------------------|--|--|--------------|------------------|--|--|--------------|------------------|--|--|--------------|------------------|--|--|--------------|------------------|--|--|--------------|------------------|--|--|--------------|------------------|--|--|--------------|------------------|--|--|--------------|------------------|--|--|--------------|------------------|--|--|--------------|------------------|--|--|--------------|------------------|--|--|--------------|------------------|--|--|--------------|------------------|--|--|--------------|------------------|--|--|--------------|------------------|--|--|--------------|------------------|--|--|--------------|------------------|--|--|--------------|------------------|--|--|--------------|------------------|--|--|--------------|------------------|--|--|--------------|------------------|--|--|--------------|------------------|--|--|--------------|------------------|--|--|--------------|------------------|--|--|--------------|------------------|--|--|--------------|------------------|--|--|--------------|------------------|--|--|--------------|------------------|--|--|--------------|------------------|--|--|--------------|------------------|--|--|--------------|------------------|--|--|--------------|------------------|--|--|--------------|------------------|--|--|--------------|------------------|--|--|--------------|------------------|--|--|--------------|------------------|--|--|--------------|------------------|--|--|--------------|------------------|--|--|--------------|------------------|--|--|--------------|------------------|--|--|--------------|------------------|--|--|--------------|------------------|--|--|--------------|------------------|--|--|--------------|------------------|--|--|--------------|------------------|--|--|--------------|------------------|--|--|--------------|------------------|--|--|--------------|------------------|--|--|--------------|------------------|--|--|--------------|------------------|--|--|--------------|------------------|--|--|--------------|------------------|--|--|--------------|------------------|--|--|--------------|------------------|--|--|--------------|------------------|--|--|--------------|------------------|--|--|--------------|------------------|--|--|--------------|------------------|--|--|--------------|------------------|--|--|--------------|------------------|--|--|--------------|------------------|--|--|--------------|------------------|--|--|--------------|------------------|--|--|--------------|------------------|--|--|--------------|------------------|--|--|--------------|------------------|--|--|--------------|------------------|--|--|--------------|------------------|--|--|--------------|------------------|--|--|--------------|------------------|--|--|--------------|------------------|--|--|--------------|------------------|--|--|--------------|------------------|--|--|--------------|------------------|--|--|--------------|------------------|--|--|--------------|------------------|--|--|--------------|------------------|--|--|--------------|------------------|--|--|--------------|------------------|--|--|--------------|------------------|--|--|--------------|------------------|--|--|--------------|------------------|--|--|--------------|------------------|--|--|--------------|------------------|--|--|--------------|------------------|--|--|--------------|------------------|--|--|--------------|------------------|--|--|--------------|------------------|--|--|--------------|------------------|--|--|--------------|------------------|--|--|--------------|------------------|--|--|--------------|------------------|--|--|--------------|------------------|--|--|--------------|------------------|--|--|--------------|------------------|--|--|--------------|------------------|--|--|--------------|------------------|--|--|--------------|------------------|--|--|--------------|------------------|--|--|--------------|------------------|--|--|--------------|------------------|--|--|--------------|------------------|--|--|--------------|------------------|--|--|--------------|------------------|--|--|--------------|------------------|--|--|--------------|------------------|--|--|--------------|------------------|--|--|--------------|------------------|--|--|--------------|------------------|--|--|--------------|------------------|--|--|--------------|------------------|--|--|--------------|------------------|--|--|--------------|------------------|--|--|--------------|------------------|--|--|--------------|------------------|--|--|--------------|------------------|--|--|--------------|------------------|--|--|--------------|------------------|--|--|--------------|------------------|--|--|--------------|------------------|--|--|--------------|------------------|--|--|--------------|------------------|--|--|--------------|------------------|--|--|--------------|------------------|--|--|--------------|------------------|--|--|--------------|------------------|--|--|--------------|------------------|--|--|--------------|------------------|--|--|--------------|------------------|--|--|--------------|------------------|--|--|--------------|------------------|--|--|------------|

**Title:** Comparative Multidimensional Molecular Analyses of Pediatric Diffuse Intrinsic Pontine Glioma Reveals Distinct Molecular Subtypes  
**Journal:** Acta Neuropathologica

Authors: Amanda M. Saratsis, Madhuri Kamechampani, Kendall Snyder, Shidevi Yadavilli, Joe Devaney,

Joyce Naxarian, Children's N

111 Michigan Ave., NW, Washington DC, 20010

Email: [INaxarian@CNMC.org](mailto:INaxarian@CNMC.org)

| value/106 | MeanRatio | FoldChange |
|-----------|-----------|------------|
| 1.0       | 1.0       | 1.0        |
| 1.1       | 1.1       | 1.1        |
| 1.2       | 1.2       | 1.2        |
| 1.3       | 1.3       | 1.3        |
| 1.4       | 1.4       | 1.4        |
| 1.5       | 1.5       | 1.5        |
| 1.6       | 1.6       | 1.6        |
| 1.7       | 1.7       | 1.7        |
| 1.8       | 1.8       | 1.8        |
| 1.9       | 1.9       | 1.9        |
| 2.0       | 2.0       | 2.0        |
| 2.1       | 2.1       | 2.1        |
| 2.2       | 2.2       | 2.2        |
| 2.3       | 2.3       | 2.3        |
| 2.4       | 2.4       | 2.4        |
| 2.5       | 2.5       | 2.5        |
| 2.6       | 2.6       | 2.6        |
| 2.7       | 2.7       | 2.7        |
| 2.8       | 2.8       | 2.8        |
| 2.9       | 2.9       | 2.9        |
| 3.0       | 3.0       | 3.0        |
| 3.1       | 3.1       | 3.1        |
| 3.2       | 3.2       | 3.2        |
| 3.3       | 3.3       | 3.3        |
| 3.4       | 3.4       | 3.4        |
| 3.5       | 3.5       | 3.5        |
| 3.6       | 3.6       | 3.6        |
| 3.7       | 3.7       | 3.7        |
| 3.8       | 3.8       | 3.8        |
| 3.9       | 3.9       | 3.9        |
| 4.0       | 4.0       | 4.0        |
| 4.1       | 4.1       | 4.1        |
| 4.2       | 4.2       | 4.2        |
| 4.3       | 4.3       | 4.3        |
| 4.4       | 4.4       | 4.4        |
| 4.5       | 4.5       | 4.5        |
| 4.6       | 4.6       | 4.6        |
| 4.7       | 4.7       | 4.7        |
| 4.8       | 4.8       | 4.8        |
| 4.9       | 4.9       | 4.9        |
| 5.0       | 5.0       | 5.0        |
| 5.1       | 5.1       | 5.1        |
| 5.2       | 5.2       | 5.2        |
| 5.3       | 5.3       | 5.3        |
| 5.4       | 5.4       | 5.4        |
| 5.5       | 5.5       | 5.5        |
| 5.6       | 5.6       | 5.6        |
| 5.7       | 5.7       | 5.7        |
| 5.8       | 5.8       | 5.8        |
| 5.9       | 5.9       | 5.9        |
| 6.0       | 6.0       | 6.0        |
| 6.1       | 6.1       | 6.1        |
| 6.2       | 6.2       | 6.2        |
| 6.3       | 6.3       | 6.3        |
| 6.4       | 6.4       | 6.4        |
| 6.5       | 6.5       | 6.5        |
| 6.6       | 6.6       | 6.6        |
| 6.7       | 6.7       | 6.7        |
| 6.8       | 6.8       | 6.8        |
| 6.9       | 6.9       | 6.9        |
| 7.0       | 7.0       | 7.0        |
| 7.1       | 7.1       | 7.1        |
| 7.2       | 7.2       | 7.2        |
| 7.3       | 7.3       | 7.3        |
| 7.4       | 7.4       | 7.4        |
| 7.5       | 7.5       | 7.5        |
| 7.6       | 7.6       | 7.6        |
| 7.7       | 7.7       | 7.7        |
| 7.8       | 7.8       | 7.8        |
| 7.9       | 7.9       | 7.9        |
| 8.0       | 8.0       | 8.0        |
| 8.1       | 8.1       | 8.1        |
| 8.2       | 8.2       | 8.2        |
| 8.3       | 8.3       | 8.3        |
| 8.4       | 8.4       | 8.4        |
| 8.5       | 8.5       | 8.5        |
| 8.6       | 8.6       | 8.6        |
| 8.7       | 8.7       | 8.7        |
| 8.8       | 8.8       | 8.8        |
| 8.9       | 8.9       | 8.9        |
| 9.0       | 9.0       | 9.0        |
| 9.1       | 9.1       | 9.1        |
| 9.2       | 9.2       | 9.2        |
| 9.3       | 9.3       | 9.3        |
| 9.4       | 9.4       | 9.4        |
| 9.5       | 9.5       | 9.5        |
| 9.6       | 9.6       | 9.6        |
| 9.7       | 9.7       | 9.7        |
| 9.8       | 9.8       | 9.8        |
| 9.9       | 9.9       | 9.9        |
| 10.0      | 10.0      | 10.0       |

[illegible]

File: ISM\_10 (Online Resource)

Title: Comparative Multidimensional Molecular Analyses of Pediatric Diffuse Intrinsic Tumors: Gene Gloms Reveals Distinct Molecular Subtypes

Journal: Acta Neuro-pathologica

Authors: Amanda M. Sennis, Madhuri Kumbhakar, Kendall Snyder, Sidexi Yavuz, Joe Devenny,

Breanna Harmon, Jordan Hall, Eric H. Raabe, Ping An, Melanie Weingart, Brian Ross, Sarah Magee, Roger J. Packer, Navaz Navsaria

Corresponding Author:

Joval Nazarian, Children's National Medical Center, Center for Genetic Medicine,

111 Michigan Ave., NW, Washington DC, 20010

Phone: 202-476-0022; Fax: 202-476-0014

Email: JNazarian@CNMC.org

| Gene ID | FoldChange[106] |  |  |  | FoldChange[111] |  |  |  | FoldChange[112] |  |  |  | FoldChange[121] |  |  |  | FoldChange[137] |  |  |  | FoldChange[153] |  |  |  | FoldChange[157] |  |  |  | FoldChange[165] |  |  |  | FoldChange[170] |  |  |  | FoldChange[171] |  |  |  | FoldChange[172] |  |  |  | FoldChange[173] |  |  |  | FoldChange[174] |  |  |  | FoldChange[175] |  |  |  | FoldChange[176] |  |  |  | FoldChange[177] |  |  |  | FoldChange[178] |  |  |  | FoldChange[179] |  |  |  | FoldChange[180] |  |  |  | FoldChange[181] |  |  |  | FoldChange[182] |  |  |  | FoldChange[183] |  |  |  | FoldChange[184] |  |  |  | FoldChange[185] |  |  |  | FoldChange[186] |  |  |  | FoldChange[187] |  |  |  | FoldChange[188] |  |  |  | FoldChange[189] |  |  |  | FoldChange[190] |  |  |  | FoldChange[191] |  |  |  | FoldChange[192] |  |  |  | FoldChange[193] |  |  |  | FoldChange[194] |  |  |  | FoldChange[195] |  |  |  | FoldChange[196] |  |  |  | FoldChange[197] |  |  |  | FoldChange[198] |  |  |  | FoldChange[199] |  |  |  | FoldChange[200] |  |  |  | FoldChange[201] |  |  |  | FoldChange[202] |  |  |  | FoldChange[203] |  |  |  | FoldChange[204] |  |  |  | FoldChange[205] |  |  |  | FoldChange[206] |  |  |  | FoldChange[207] |  |  |  | FoldChange[208] |  |  |  | FoldChange[209] |  |  |  | FoldChange[210] |  |  |  | FoldChange[211] |  |  |  | FoldChange[212] |  |  |  | FoldChange[213] |  |  |  | FoldChange[214] |  |  |  | FoldChange[215] |  |  |  | FoldChange[216] |  |  |  | FoldChange[217] |  |  |  | FoldChange[218] |  |  |  | FoldChange[219] |  |  |  | FoldChange[220] |  |  |  | FoldChange[221] |  |  |  | FoldChange[222] |  |  |  | FoldChange[223] |  |  |  | FoldChange[224] |  |  |  | FoldChange[225] |  |  |  | FoldChange[226] |  |  |  | FoldChange[227] |  |  |  | FoldChange[228] |  |  |  | FoldChange[229] |  |  |  | FoldChange[230] |  |  |  | FoldChange[231] |  |  |  | FoldChange[232] |  |  |  | FoldChange[233] |  |  |  | FoldChange[234] |  |  |  | FoldChange[235] |  |  |  | FoldChange[236] |  |  |  | FoldChange[237] |  |  |  | FoldChange[238] |  |  |  | FoldChange[239] |  |  |  | FoldChange[240] |  |  |  | FoldChange[241] |  |  |  | FoldChange[242] |  |  |  | FoldChange[243] |  |  |  | FoldChange[244] |  |  |  | FoldChange[245] |  |  |  | FoldChange[246] |  |  |  | FoldChange[247] |  |  |  | FoldChange[248] |  |  |  | FoldChange[249] |  |  |  | FoldChange[250] |  |  |  | FoldChange[251] |  |  |  | FoldChange[252] |  |  |  | FoldChange[253] |  |  |  | FoldChange[254] |  |  |  | FoldChange[255] |  |  |  | FoldChange[256] |  |  |  | FoldChange[257] |  |  |  | FoldChange[258] |  |  |  | FoldChange[259] |  |  |  | FoldChange[260] |  |  |  | FoldChange[261] |  |  |  | FoldChange[262] |  |  |  | FoldChange[263] |  |  |  | FoldChange[264] |  |  |  | FoldChange[265] |  |  |  | FoldChange[266] |  |  |  | FoldChange[267] |  |  |  | FoldChange[268] |  |  |  | FoldChange[269] |  |  |  | FoldChange[270] |  |  |  | FoldChange[271] |  |  |  | FoldChange[272] |  |  |  | FoldChange[273] |  |  |  | FoldChange[274] |  |  |  | FoldChange[275] |  |  |  | FoldChange[276] |  |  |  | FoldChange[277] |  |  |  | FoldChange[278] |  |  |  | FoldChange[279] |  |  |  | FoldChange[280] |  |  |  | FoldChange[281] |  |  |  | FoldChange[282] |  |  |  | FoldChange[283] |  |  |  | FoldChange[284] |  |  |  | FoldChange[285] |  |  |  | FoldChange[286] |  |  |  | FoldChange[287] |  |  |  | FoldChange[288] |  |  |  | FoldChange[289] |  |  |  | FoldChange[290] |  |  |  | FoldChange[291] |  |  |  | FoldChange[292] |  |  |  | FoldChange[293] |  |  |  | FoldChange[294] |  |  |  | FoldChange[295] |  |  |  | FoldChange[296] |  |  |  | FoldChange[297] |  |  |  | FoldChange[298] |  |  |  | FoldChange[299] |  |  |  | FoldChange[300] |  |  |  | FoldChange[301] |  |  |  | FoldChange[302] |  |  |  | FoldChange[303] |  |  |  | FoldChange[304] |  |  |  | FoldChange[305] |  |  |  | FoldChange[306] |  |  |  | FoldChange[307] |  |  |  | FoldChange[308] |  |  |  | FoldChange[309] |  |  |  | FoldChange[310] |  |  |  | FoldChange[311] |  |  |  | FoldChange[312] |  |  |  | FoldChange[313] |  |  |  | FoldChange[314] |  |  |  | FoldChange[315] |  |  |  | FoldChange[316] |  |  |  | FoldChange[317] |  |  |  | FoldChange[318] |  |  |  | FoldChange[319] |  |  |  | FoldChange[320] |  |  |  | FoldChange[321] |  |  |  | FoldChange[322] |  |  |  | FoldChange[323] |  |  |  | FoldChange[324] |  |  |  | FoldChange[325] |  |  |  | FoldChange[326] |  |  |  | FoldChange[327] |  |  |  | FoldChange[328] |  |  |  | FoldChange[329] |  |  |  | FoldChange[330] |  |  |  | FoldChange[331] |  |  |  | FoldChange[332] |  |  |  | FoldChange[333] |  |  |  | FoldChange[334] |  |  |  | FoldChange[335] |  |  |  | FoldChange[336] |  |  |  | FoldChange[337] |  |  |  | FoldChange[338] |  |  |  | FoldChange[339] |  |  |  | FoldChange[340] |  |  |  | FoldChange[341] |  |  |  | FoldChange[342] |  |  |  | FoldChange[343] |  |  |  | FoldChange[344] |  |  |  | FoldChange[345] |  |  |  | FoldChange[346] |  |  |  | FoldChange[347] |  |  |  | FoldChange[348] |  |  |  | FoldChange[349] |  |  |  | FoldChange[350] |  |  |  | FoldChange[351] |  |  |  | FoldChange[352] |  |  |  | FoldChange[353] |  |  |  | FoldChange[354] |  |  |  | FoldChange[355] |  |  |  | FoldChange[356] |  |  |  | FoldChange[357] |  |  |  | FoldChange[358] |  |  |  | FoldChange[359] |  |  |  | FoldChange[360] |  |  |  | FoldChange[361] |  |  |  | FoldChange[362] |  |  |  | FoldChange[363] |  |  |  | FoldChange[364] |  |  |  | FoldChange[365] |  |  |  | FoldChange[366] |  |  |  | FoldChange[367] |  |  |  | FoldChange[368] |  |  |  | FoldChange[369] |  |  |  | FoldChange[370] |  |  |  | FoldChange[371] |  |  |  | FoldChange[372] |  |  |  | FoldChange[373] |  |  |  | FoldChange[374] |  |  |  | FoldChange[375] |  |  |  | FoldChange[376] |  |  |  | FoldChange[377] |  |  |  | FoldChange[378] |  |  |  | FoldChange[379] |  |  |  | FoldChange[380] |  |  |  | FoldChange[381] |  |  |  | FoldChange[382] |  |  |  | FoldChange[383] |  |  |  | FoldChange[384] |  |  |  | FoldChange[385] |  |  |  | FoldChange[386] |  |  |  | FoldChange[387] |  |  |  | FoldChange[388] |  |  |  | FoldChange[389] |  |  |  | FoldChange[390] |  |  |  | FoldChange[391] |  |  |  | FoldChange[392] |  |  |  | FoldChange[393] |  |  |  | FoldChange[394] |  |  |  | FoldChange[395] |  |  |  | FoldChange[396] |  |  |  | FoldChange[397] |  |  |  | FoldChange[398] |  |  |  | FoldChange[399] |  |  |  | FoldChange[400] |  |  |  | FoldChange[401] |  |  |  | FoldChange[402] |  |  |  | FoldChange[403] |  |  |  | FoldChange[404] |  |  |  | FoldChange[405] |  |  |  | FoldChange[406] |  |  |  | FoldChange[407] |  |  |  | FoldChange[408] |  |  |  | FoldChange[409] |  |  |  | FoldChange[410] |  |  |  | FoldChange[411] |  |  |  | FoldChange[412] |  |  |  | FoldChange[413] |  |  |  | FoldChange[414] |  |  |  | FoldChange[415] |  |  |  | FoldChange[416] |  |  |  | FoldChange[417] |  |  |  | FoldChange[418] |  |  |  | FoldChange[419] |  |  |  | FoldChange[420] |  |  |  | FoldChange[421] |  |  |  | FoldChange[422] |  |  |  | FoldChange[423] |  |  |  | FoldChange[424] |  |  |  | FoldChange[425] |  |  |  | FoldChange[426] |  |  |  | FoldChange[427] |  |  |  | FoldChange[428] |  |  |  | FoldChange[429] |  |  |  | FoldChange[430] |  |  |  | FoldChange[431] |  |  |  | FoldChange[432] |  |  |  | FoldChange[433] |  |  |  | FoldChange[434] |  |  |  | FoldChange[435] |  |  |  | FoldChange[436] |  |  |  | FoldChange[437] |  |  |  | FoldChange[438] |  |  |  | FoldChange[439] |  |  |  | FoldChange[440] |  |  |  | FoldChange[441] |  |  |  | FoldChange[442] |  |  |  | FoldChange[443] |  |  |  | FoldChange[444] |  |  |  | FoldChange[445] |  |  |  | FoldChange[446] |  |  |  | FoldChange[447] |  |  |  | FoldChange[448] |  |  |  | FoldChange[449] |  |  |  | FoldChange[450] |  |  |  | FoldChange[451] |  |  |  | FoldChange[452] |  |  |  | FoldChange[453] |  |  |  | FoldChange[454] |  |  |  | FoldChange[455] |  |  |  | FoldChange[456] |  |  |  | FoldChange[457] |  |  |  | FoldChange[458] |  |  |  | FoldChange[459] |  |  |  | FoldChange[460] |  |  |  | FoldChange[461] |  |  |  | FoldChange[462] |  |  |  | FoldChange[463] |  |  |  | FoldChange[464] |  |  |  | FoldChange[465] |  |  |  | FoldChange[466] |  |  |  | FoldChange[467] |  |  |  | FoldChange[468] |  |  |  | FoldChange[469] |  |  |  | FoldChange[470] |  |  |  | FoldChange[471] |  |  |  | FoldChange[472] |  |  |  | FoldChange[473] |  |  |  | FoldChange[474] |  |  |  | FoldChange[475] |  |  |  | FoldChange[476] |  |  |  | FoldChange[477] |  |  |  | FoldChange[478] |  |  |  | FoldChange[479] |  |  |  | FoldChange[480] |  |  |  | FoldChange[481] |  |  |  | FoldChange[482] |  |  |  | FoldChange[483] |  |  |  | FoldChange[484] |  |  |  | FoldChange[485] |  |  |  | FoldChange[486] |  |  |  | FoldChange[487] |  |  |  | FoldChange[488] |  |  |  | FoldChange[489] |  |  |  | FoldChange[490] |  |  |  | FoldChange[491] |  |  |  | FoldChange[492] |  |  |  | FoldChange[493] |  |  |  | FoldChange[494] |  |  |  | FoldChange[495] |  |  |  | FoldChange[496] |  |  |  | FoldChange[497] |  |  |  | FoldChange[498] |  |  |  | FoldChange[499] |  |  |  | FoldChange[500] |  |  |  | FoldChange[501] |  |  |  | FoldChange[502] |  |  |  | FoldChange[503] |  |  |  | FoldChange[504] |  |  |  | FoldChange[505] |  |  |  | FoldChange[506] |  |  |  | FoldChange[507] |  |  |  | FoldChange[508] |  |  |  | FoldChange[509] |  |  |  | FoldChange[510] |  |  |  | FoldChange[511] |  |  |  | FoldChange[512] |  |  |  | FoldChange[513] |  |  |  | FoldChange[514] |  |  |  | FoldChange[515] |  |  |  | FoldChange[516] |  |  |  | FoldChange[517] |  |  |  | FoldChange[518] |  |  |  | FoldChange[519] |  |  |  | FoldChange[520] |  |  |  | FoldChange[521] |  |  |  | FoldChange[522] |  |  |  | FoldChange[523] |  |  |  | FoldChange[524] |  |  |  | FoldChange[525] |  |  |  | FoldChange[526] |  |  |  | FoldChange[527] |  |  |  | FoldChange[528] |  |  |  | FoldChange[529] |  |  |  | FoldChange[530] |  |  |  | FoldChange[531] |  |  |  | FoldChange[532] |  |  |  | FoldChange[533] |  |  |  | FoldChange[534] |  |  |  | FoldChange[535] |  |  |  | FoldChange[536] |  |  |  | FoldChange[537] |  |  |  | FoldChange[538] |  |  |  | FoldChange[539] |  |  |  | FoldChange[540] |  |  |  | FoldChange[541] |  |  |  | FoldChange[542] |  |  |  | FoldChange[543] |  |  |  | FoldChange[544] |  |  |  | FoldChange[545] |  |  |  | FoldChange[546] |  |  |  | FoldChange[547] |  |  |  | FoldChange[548] |  |  |  | FoldChange[549] |  |  |  | FoldChange[550] |  |  |  | FoldChange[551] |  |  |  | FoldChange[552] |  |  |  | FoldChange[553] |  |  |  | FoldChange[554] |  |  |  | FoldChange[555] |  |  |  | FoldChange[556] |  |  |  | FoldChange[557] |  |  |  | FoldChange[558] |  |  |  | FoldChange[559] |  |  |  | FoldChange[560] |  |  |  | FoldChange[561] |  |  |  | FoldChange[562] |  |  |  | FoldChange[563] |  |  |  | FoldChange[564] |  |  |  | FoldChange[565] |  |  |  | FoldChange[566] |  |  |  | FoldChange[567] |  |  |  | FoldChange[568] |  |  |  | FoldChange[569] |  |  |  | FoldChange[570] |  |  |  | FoldChange[571] |  |  |  | FoldChange[572] |  |  |  | FoldChange[573] |  |  |  | FoldChange[574] |  |  |  | FoldChange[575] |  |  |  | FoldChange[576] |  |  |  | FoldChange[577] |  |  |  | FoldChange[578] |  |  |  | FoldChange[579] |  |  |  | FoldChange[580] |  |  |  | FoldChange[581] |  |  |  | FoldChange[582] |  |  |  | FoldChange[583] |  |  |  | FoldChange[584] |  |  |  | FoldChange[585] |  |  |  | FoldChange[586] |  |  |  | FoldChange[587] |  |  |  | FoldChange[588] |  |  |  | FoldChange[589] |  |  |  | FoldChange[590] |  |  |  | FoldChange[591] |  |  |  | FoldChange[592] |  |  |  | FoldChange[593] |  |  |  | FoldChange[594] |  |  |  | FoldChange[595] |  |  |  | FoldChange[596] |  |  |  | FoldChange[597] |  |  |  | FoldChange[598] |  |  |  | FoldChange[599] |  |  |  | FoldChange[600] |  |  |  | FoldChange[601] |  |  |  | FoldChange[602] |  |  |  | FoldChange[603] |  |  |  | FoldChange[604] |  |  |  | FoldChange[605] |  |  |  | FoldChange[606] |  |  |  | FoldChange[607] |  |  |  | FoldChange[608] |  |  |  | FoldChange[609] |  |  |  | FoldChange[610] |  |  |  | FoldChange[611] |  |  |  | FoldChange[612] |  |  |  | FoldChange[613] |  |  |  | FoldChange[614] |  |  |  | FoldChange[615] |  |  |  | FoldChange[616] |  |  |  | FoldChange[617] |  |  |  | FoldChange[618] |  |  |  | FoldChange[619] |  |  |  | FoldChange[620] |  |  |  | FoldChange[621] |  |  |  | FoldChange[622] |  |  |  | FoldChange[623] |  |  |  | FoldChange[624] |  |  |  | FoldChange[625] |  |  |  | FoldChange[626] |  |  |  | FoldChange[627] |  |  |  | FoldChange[628] |  |  |  | FoldChange[629] |  |  |  | FoldChange[630] |  |  |  | FoldChange[631] |  |  |  | FoldChange[632] |  |  |  | FoldChange[633] |  |  |  | FoldChange[634] |  |  |  | FoldChange[635] |  |  |  | FoldChange[636] |  |  |  | FoldChange[637] |  |  |  | FoldChange[638] |  |  |  | FoldChange[639] |  |  |  | FoldChange[640] |  |  |  | FoldChange[641] |  |  |  | FoldChange[642] |  |  |  | FoldChange[643] |  |  |  | FoldChange[644] |  |  |  | FoldChange[645] |  |  |  | FoldChange[646] |  |  |  | FoldChange[647] |  |  |  | FoldChange[648] |  |  |  | FoldChange[649] |  |  |  | FoldChange[650] |  |  |  | FoldChange[651] |  |  |  | FoldChange[652] |  |  |  | FoldChange[653] |  |  |  | FoldChange[654] |  |  |  | FoldChange[655] |  |  |  | FoldChange[656] |  |  |  | FoldChange[657] |  |  |  | FoldChange[658] |  |  |  | FoldChange[659] |  |  |  | FoldChange[660] |  |  |  | FoldChange[661] |  |  |  | FoldChange[662] |  |  |  | FoldChange[663] |  |  |  | FoldChange[664] |  |  |  | FoldChange[665] |  |  |  | FoldChange[666] |  |  |  | FoldChange[667] |  |  |  | FoldChange[668] |  |  |  | FoldChange[669] |  |  |  | FoldChange[670] |  |  |  | FoldChange[671] |  |  |  | FoldChange[672] |  |  |  | FoldChange[673] |  |  |  | FoldChange[674] |  |  |  | FoldChange[675] |  |  |  | FoldChange[676] |  |  |  | FoldChange[677] |  |  |  | FoldChange[678] |  |  |  | FoldChange[679] |  |  |  | FoldChange[680] |  |  |  | FoldChange[681] |  |  |  | FoldChange[682] |  |  |  | FoldChange[683] |  |  |  | FoldChange[684] |  |  |  | FoldChange[685] |  |  |  | FoldChange[686] |  |  |  | FoldChange[687] |  |  |  | FoldChange[688] |  |  |  | FoldChange[689] |  |  |  | FoldChange[690] |  |  |  | FoldChange[691] |  |  |  | FoldChange[692] |  |  |  | FoldChange[693] |  |  |  | FoldChange[694] |  |  |  | FoldChange[695] |  |  |  | FoldChange[696] |  |  |  | FoldChange[697] |  |  |  | FoldChange[698] |  |  |  | FoldChange[699] |  |  |  | FoldChange[700] |  |  |  | FoldChange[701] |  |  |  | FoldChange[702] |  |  |  | FoldChange[703] |  |  |  | FoldChange[704] |  |  |  | FoldChange[705] |  |  |  | FoldChange[706] |  |  |  | FoldChange[707] |  |  |  | FoldChange[708] |  |  |  | FoldChange[709] |  |  |  | FoldChange[710] |  |  |  | FoldChange[711] |  |  |  | FoldChange[712] |  |  |  | FoldChange[713] |  |  |  | FoldChange[714] |  |  |  | FoldChange[715] |  |  |  | FoldChange[716] |  |  |  | FoldChange[717] |  |  |  | FoldChange[718] |  |  |  | FoldChange[719] |  |  |  | FoldChange[720] |  |  |  | FoldChange[721] |  |  |  | FoldChange[722] |  |  |  | FoldChange[723] |  |  |  | FoldChange[724] |  |  |  | FoldChange[725] |  |  |  | FoldChange[726] |  |  |  | FoldChange[727] |  |  |  | FoldChange[728] |  |  |  | FoldChange[729] |  |  |  | FoldChange[730] |  |  |  | FoldChange[731] |  |  |  | FoldChange[732] |  |  |  | FoldChange[733] |  |  |  | FoldChange[734] |  |  |  | FoldChange[735] |  |  |  | FoldChange[736] |  |  |  | FoldChange[737] |  |  |  | FoldChange[738] |  |  |  | FoldChange[739] |  |  |  | FoldChange[740] |  |  |  | FoldChange[741] |  |  |  | FoldChange[742] |  |  |  | FoldChange[743] |  |  |  | FoldChange[744] |  |  |  | FoldChange[745] |  |  |  | FoldChange[746] |  |  |  | FoldChange[747] |  |  |  | FoldChange[748] |  |  |  | FoldChange[749] |  |  |  | FoldChange[750] |  |  |  | FoldChange[751] |  |  |  | FoldChange[752] |  |  |  | FoldChange[753] |  |  |  | FoldChange[754] |  |  |  | FoldChange[755] |  |  |  | FoldChange[756] |  |  |  | FoldChange[757] |  |  |  | FoldChange[758] |  |  |  | FoldChange[759] |  |  |  | FoldChange[760] |  |  |  | FoldChange[761] |  |  |  | FoldChange[762] |  |  |  | FoldChange[763] |  |  |  | FoldChange[764] |  |  |  | FoldChange[765] |  |  |  | FoldChange[766] |  |  |  | FoldChange[767] |  |  |  | FoldChange[768] |  |  |  | FoldChange[769] |  |  |  | FoldChange[770] |  |  |  | FoldChange[771] |  |  |  | FoldChange[772] |  |  |  | FoldChange[773] |  |  |  | FoldChange[774] |  |  |  | FoldChange[775] |  |  |  | FoldChange[776] |  |  |  | FoldChange[777] |  |  |  | FoldChange[778] |  |  |  | FoldChange[779] |  |  |  | FoldChange[780] |  |  |  | FoldChange[781] |  |  |  | FoldChange[782] |  |  |  | FoldChange[783] |  |  |  | FoldChange[784] |  |  |  | FoldChange[785] |  |  |  | FoldChange[786] |  |  |  | FoldChange[787] |  |  |  | FoldChange[788] |  |  |  | FoldChange[789] |  |  |  | FoldChange[790] |  |  |  | FoldChange[791] |  |  |  | FoldChange[792] |  |  |  | FoldChange[793] |  |  |  | FoldChange[794] |  |  |  | FoldChange[795] |  |  |  | FoldChange[796] |  |  |  | FoldChange[797] |  |  |  | FoldChange[798] |  |  |  | FoldChange[799] |  |  |  | FoldChange[800] |  |  |  | FoldChange[801] |  |  |  | FoldChange[802] |  |  |  | FoldChange[803] |  |  |  | FoldChange[804] |  |  |  | FoldChange[805] |  |  |  | FoldChange[806] |  |  |  | FoldChange[807] |  |  |  | FoldChange[808] |  |  |  | FoldChange[809] |  |  |  | FoldChange[810] |  |  |  | FoldChange[811] |  |  |  | FoldChange[812] |  |  |  | FoldChange[813] |  |  |  | FoldChange[814] |  |  |  | FoldChange[815] |  |  |  | FoldChange[816] |  |  |  | FoldChange[817] |  |  |  | FoldChange[818] |  |  |  | FoldChange[819] |  |  |  | FoldChange[820] |  |  |  | FoldChange[821] |  |  |  | FoldChange[822] |  |  |  | FoldChange[823] |  |  |  | FoldChange[824] |  |  |  | FoldChange[825] |  |  |  | FoldChange[826] |  |  |  | FoldChange[827] |  |  |  | FoldChange[828] |  |  |  | FoldChange[829] |  |  |  | FoldChange[830] |  |  |  | FoldChange[831] |  |  |  | FoldChange[832] |  |  |  | FoldChange[833] |  |  |  | FoldChange[834] |  |  |  | FoldChange[835] |  |  |  | FoldChange[836] |  |  |  | FoldChange[837] |  |  |  | FoldChange[838] |  |  |  | FoldChange[839] |  |  |  | FoldChange[840] |  |  |  | FoldChange[841] |  |  |  | FoldChange[842] |  |  |  | FoldChange[843] |  |  |  | FoldChange[844] |  |  |  | FoldChange[845] |  |  |  | FoldChange[846] |  |  |  | FoldChange[847] |  |  |  | FoldChange[848] |  |  |  | FoldChange[849] |  |  |  | FoldChange[850] |  |  |  | FoldChange[851] |  |  |  | FoldChange[852] |  |  |  | FoldChange[853] |  |  |  | FoldChange[854] |  |  |  | FoldChange[855] |  |  |  | FoldChange[856] |  |  |  | FoldChange[857] |  |  |  | FoldChange[858] |  |  |  | FoldChange[859] |  |  |  | FoldChange[860] |  |  |  | FoldChange[861] |  |  |  | FoldChange[862] |  |  |  | FoldChange[863] |  |  |  | FoldChange[864] |  |  |  | FoldChange[865] |  |  |  | FoldChange[866] |  |  |  | FoldChange[867] |  |  |  | FoldChange[868] |  |  |  | FoldChange[869] |  |  |  | FoldChange[870] |  |  |  | FoldChange[871] |  |  |  | FoldChange[872] |  |  |  | FoldChange[873] |  |  |  | FoldChange[874] |  |  |  | FoldChange[875] |  |  |  | FoldChange[876] |  |  |  | FoldChange[877] |  |  |  | FoldChange[878] |  |  |  | FoldChange[879] |  |  |  | FoldChange[880] |  |  |  | FoldChange[881] |  |  |  | FoldChange[882] |  |  |  | FoldChange[883] |  |  |  | FoldChange[884] |  |  |  | FoldChange[885] |  |  |  | FoldChange[886] |  |  |  | FoldChange[887] |  |  |  | FoldChange[888] |  |  |  | FoldChange[889] |  |  |  | FoldChange[890] |  |  |  | FoldChange[891] |  |  |  | FoldChange[892] |  |  |  | FoldChange[893] |  |  |  | FoldChange[894] |  |  |  | FoldChange[895] |  |  |  | FoldChange[896] |  |  |  | FoldChange[897] |  |  |  | FoldChange[898] |  |  |  | FoldChange[899] |  |  |  | FoldChange[900] |  |  |  | FoldChange[901] |  |  |  | FoldChange[902] |  |  |  | FoldChange[903] |  |  |  | FoldChange[904] |  |  |  | FoldChange[905] |  |  |  | FoldChange[906] |  |  |  | FoldChange[907] |  |  |  | FoldChange[908] |  |  |  | FoldChange[909] |  |  |  | FoldChange[910] |  |  |  | FoldChange[911] |  |  |  | FoldChange[912] |  |  |  | FoldChange[913] |  |  |  | FoldChange[914] |  |  |  | FoldChange[915] |  |  |  | FoldChange[916] |  |  |  | FoldChange[917] |  |  |  | FoldChange[918] |  |  |  | FoldChange[919] |  |  |  | FoldChange[920] |  |  |  | FoldChange[921] |  |  |  | FoldChange[922] |  |  |  | FoldChange[923] |  |  |  | FoldChange[924] |  |  |  | FoldChange[925] |  |  |  | FoldChange[926] |  |  |  | FoldChange[927] |  |  |  | FoldChange[928] |  |  |  | FoldChange[929] |  |  |  | FoldChange[930] |  |  |  | FoldChange[931] |  |  |  | FoldChange[932] |  |  |  | FoldChange[933] |  |  |  | FoldChange[934] |  |  |  | FoldChange[935] |  |  |  | FoldChange[936] |  |  |  | FoldChange[937] |  |  |  | FoldChange[938] |  |  |  | FoldChange[939] |  |  |  | FoldChange[940] |  |  |  | FoldChange[941] |  |  |  | FoldChange[942] |  |  |  | FoldChange[943] |  |  |  | FoldChange[944] |  |  |  | FoldChange[945] |  |  |  | FoldChange[946] |  |  |  | FoldChange[947] |  |  |  | FoldChange[948] |  |  |  | FoldChange[949] |  |  |  | FoldChange[950] |  |  |  | FoldChange[951] |  |  |  | FoldChange[952] |  |  |  | FoldChange[953] |  |  |  | FoldChange[954] |  |  |  | FoldChange[955] |  |  |  | FoldChange[956] |  |  |  | FoldChange[957] |  |  |  | FoldChange[958] |  |  |  | FoldChange[959] |  |  |  | FoldChange[960] |  |  |  | FoldChange[961] |  |  |  | FoldChange[962] |  |  |  | FoldChange[963] |  |  |  | FoldChange[964] |  |  |  | FoldChange[965] |  |  |  | FoldChange[966] |  |  |  | FoldChange[967] |  |  |  | FoldChange[968] |  |  |  | FoldChange[969] |  |  |  | FoldChange[970] |  |  |  | FoldChange[971] |  |  |  | FoldChange[972] |  |  |  | FoldChange[973] |  |  |  | FoldChange[974] |  |  |  | FoldChange[975] |  |  |  | FoldChange[976] |  |  |  | FoldChange[977] |  |  |  | FoldChange[978] |  |  |  | FoldChange[979] |  |  |  | FoldChange[980] |  |  |  | FoldChange[981] |  |  |  | FoldChange[982] |  |  |  | FoldChange[983] |  |  |  | FoldChange[984] |  |  |  | FoldChange[985] |  |  |  | FoldChange[986] |  |  |  | FoldChange[987] |  |  |  | FoldChange[988] |  |  |  | FoldChange[989] |  |  |  | FoldChange[990] |  |  |  | FoldChange[991] |  |  |  | FoldChange[992] |  |  |  | FoldChange[993] |  |  |  | FoldChange[994] |  |  |  | FoldChange[995] |  |  |  | FoldChange[996] |  |  |  | FoldChange[997] |  |  |  | FoldChange[998] |  |  |  | FoldChange[999] |  |  |  | FoldChange[1000] |  |  |  |
|---------|-----------------|--|--|--|-----------------|--|--|--|-----------------|--|--|--|-----------------|--|--|--|-----------------|--|--|--|-----------------|--|--|--|-----------------|--|--|--|-----------------|--|--|--|-----------------|--|--|--|-----------------|--|--|--|-----------------|--|--|--|-----------------|--|--|--|-----------------|--|--|--|-----------------|--|--|--|-----------------|--|--|--|-----------------|--|--|--|-----------------|--|--|--|-----------------|--|--|--|-----------------|--|--|--|-----------------|--|--|--|-----------------|--|--|--|-----------------|--|--|--|-----------------|--|--|--|-----------------|--|--|--|-----------------|--|--|--|-----------------|--|--|--|-----------------|--|--|--|-----------------|--|--|--|-----------------|--|--|--|-----------------|--|--|--|-----------------|--|--|--|-----------------|--|--|--|-----------------|--|--|--|-----------------|--|--|--|-----------------|--|--|--|-----------------|--|--|--|-----------------|--|--|--|-----------------|--|--|--|-----------------|--|--|--|-----------------|--|--|--|-----------------|--|--|--|-----------------|--|--|--|-----------------|--|--|--|-----------------|--|--|--|-----------------|--|--|--|-----------------|--|--|--|-----------------|--|--|--|-----------------|--|--|--|-----------------|--|--|--|-----------------|--|--|--|-----------------|--|--|--|-----------------|--|--|--|-----------------|--|--|--|-----------------|--|--|--|-----------------|--|--|--|-----------------|--|--|--|-----------------|--|--|--|-----------------|--|--|--|-----------------|--|--|--|-----------------|--|--|--|-----------------|--|--|--|-----------------|--|--|--|-----------------|--|--|--|-----------------|--|--|--|-----------------|--|--|--|-----------------|--|--|--|-----------------|--|--|--|-----------------|--|--|--|-----------------|--|--|--|-----------------|--|--|--|-----------------|--|--|--|-----------------|--|--|--|-----------------|--|--|--|-----------------|--|--|--|-----------------|--|--|--|-----------------|--|--|--|-----------------|--|--|--|-----------------|--|--|--|-----------------|--|--|--|-----------------|--|--|--|-----------------|--|--|--|-----------------|--|--|--|-----------------|--|--|--|-----------------|--|--|--|-----------------|--|--|--|-----------------|--|--|--|-----------------|--|--|--|-----------------|--|--|--|-----------------|--|--|--|-----------------|--|--|--|-----------------|--|--|--|-----------------|--|--|--|-----------------|--|--|--|-----------------|--|--|--|-----------------|--|--|--|-----------------|--|--|--|-----------------|--|--|--|-----------------|--|--|--|-----------------|--|--|--|-----------------|--|--|--|-----------------|--|--|--|-----------------|--|--|--|-----------------|--|--|--|-----------------|--|--|--|-----------------|--|--|--|-----------------|--|--|--|-----------------|--|--|--|-----------------|--|--|--|-----------------|--|--|--|-----------------|--|--|--|-----------------|--|--|--|-----------------|--|--|--|-----------------|--|--|--|-----------------|--|--|--|-----------------|--|--|--|-----------------|--|--|--|-----------------|--|--|--|-----------------|--|--|--|-----------------|--|--|--|-----------------|--|--|--|-----------------|--|--|--|-----------------|--|--|--|-----------------|--|--|--|-----------------|--|--|--|-----------------|--|--|--|-----------------|--|--|--|-----------------|--|--|--|-----------------|--|--|--|-----------------|--|--|--|-----------------|--|--|--|-----------------|--|--|--|-----------------|--|--|--|-----------------|--|--|--|-----------------|--|--|--|-----------------|--|--|--|-----------------|--|--|--|-----------------|--|--|--|-----------------|--|--|--|-----------------|--|--|--|-----------------|--|--|--|-----------------|--|--|--|-----------------|--|--|--|-----------------|--|--|--|-----------------|--|--|--|-----------------|--|--|--|-----------------|--|--|--|-----------------|--|--|--|-----------------|--|--|--|-----------------|--|--|--|-----------------|--|--|--|-----------------|--|--|--|-----------------|--|--|--|-----------------|--|--|--|-----------------|--|--|--|-----------------|--|--|--|-----------------|--|--|--|-----------------|--|--|--|-----------------|--|--|--|-----------------|--|--|--|-----------------|--|--|--|-----------------|--|--|--|-----------------|--|--|--|-----------------|--|--|--|-----------------|--|--|--|-----------------|--|--|--|-----------------|--|--|--|-----------------|--|--|--|-----------------|--|--|--|-----------------|--|--|--|-----------------|--|--|--|-----------------|--|--|--|-----------------|--|--|--|-----------------|--|--|--|-----------------|--|--|--|-----------------|--|--|--|-----------------|--|--|--|-----------------|--|--|--|-----------------|--|--|--|-----------------|--|--|--|-----------------|--|--|--|-----------------|--|--|--|-----------------|--|--|--|-----------------|--|--|--|-----------------|--|--|--|-----------------|--|--|--|-----------------|--|--|--|-----------------|--|--|--|-----------------|--|--|--|-----------------|--|--|--|-----------------|--|--|--|-----------------|--|--|--|-----------------|--|--|--|-----------------|--|--|--|-----------------|--|--|--|-----------------|--|--|--|-----------------|--|--|--|-----------------|--|--|--|-----------------|--|--|--|-----------------|--|--|--|-----------------|--|--|--|-----------------|--|--|--|-----------------|--|--|--|-----------------|--|--|--|-----------------|--|--|--|-----------------|--|--|--|-----------------|--|--|--|-----------------|--|--|--|-----------------|--|--|--|-----------------|--|--|--|-----------------|--|--|--|-----------------|--|--|--|-----------------|--|--|--|-----------------|--|--|--|-----------------|--|--|--|-----------------|--|--|--|-----------------|--|--|--|-----------------|--|--|--|-----------------|--|--|--|-----------------|--|--|--|-----------------|--|--|--|-----------------|--|--|--|-----------------|--|--|--|-----------------|--|--|--|-----------------|--|--|--|-----------------|--|--|--|-----------------|--|--|--|-----------------|--|--|--|-----------------|--|--|--|-----------------|--|--|--|-----------------|--|--|--|-----------------|--|--|--|-----------------|--|--|--|-----------------|--|--|--|-----------------|--|--|--|-----------------|--|--|--|-----------------|--|--|--|-----------------|--|--|--|-----------------|--|--|--|-----------------|--|--|--|-----------------|--|--|--|-----------------|--|--|--|-----------------|--|--|--|-----------------|--|--|--|-----------------|--|--|--|-----------------|--|--|--|-----------------|--|--|--|-----------------|--|--|--|-----------------|--|--|--|-----------------|--|--|--|-----------------|--|--|--|-----------------|--|--|--|-----------------|--|--|--|-----------------|--|--|--|-----------------|--|--|--|-----------------|--|--|--|-----------------|--|--|--|-----------------|--|--|--|-----------------|--|--|--|-----------------|--|--|--|-----------------|--|--|--|-----------------|--|--|--|-----------------|--|--|--|-----------------|--|--|--|-----------------|--|--|--|-----------------|--|--|--|-----------------|--|--|--|-----------------|--|--|--|-----------------|--|--|--|-----------------|--|--|--|-----------------|--|--|--|-----------------|--|--|--|-----------------|--|--|--|-----------------|--|--|--|-----------------|--|--|--|-----------------|--|--|--|-----------------|--|--|--|-----------------|--|--|--|-----------------|--|--|--|-----------------|--|--|--|-----------------|--|--|--|-----------------|--|--|--|-----------------|--|--|--|-----------------|--|--|--|-----------------|--|--|--|-----------------|--|--|--|-----------------|--|--|--|-----------------|--|--|--|-----------------|--|--|--|-----------------|--|--|--|-----------------|--|--|--|-----------------|--|--|--|-----------------|--|--|--|-----------------|--|--|--|-----------------|--|--|--|-----------------|--|--|--|-----------------|--|--|--|-----------------|--|--|--|-----------------|--|--|--|-----------------|--|--|--|-----------------|--|--|--|-----------------|--|--|--|-----------------|--|--|--|-----------------|--|--|--|-----------------|--|--|--|-----------------|--|--|--|-----------------|--|--|--|-----------------|--|--|--|-----------------|--|--|--|-----------------|--|--|--|-----------------|--|--|--|-----------------|--|--|--|-----------------|--|--|--|-----------------|--|--|--|-----------------|--|--|--|-----------------|--|--|--|-----------------|--|--|--|-----------------|--|--|--|-----------------|--|--|--|-----------------|--|--|--|-----------------|--|--|--|-----------------|--|--|--|-----------------|--|--|--|-----------------|--|--|--|-----------------|--|--|--|-----------------|--|--|--|-----------------|--|--|--|-----------------|--|--|--|-----------------|--|--|--|-----------------|--|--|--|-----------------|--|--|--|-----------------|--|--|--|-----------------|--|--|--|-----------------|--|--|--|-----------------|--|--|--|-----------------|--|--|--|-----------------|--|--|--|-----------------|--|--|--|-----------------|--|--|--|-----------------|--|--|--|-----------------|--|--|--|-----------------|--|--|--|-----------------|--|--|--|-----------------|--|--|--|-----------------|--|--|--|-----------------|--|--|--|-----------------|--|--|--|-----------------|--|--|--|-----------------|--|--|--|-----------------|--|--|--|-----------------|--|--|--|-----------------|--|--|--|-----------------|--|--|--|-----------------|--|--|--|-----------------|--|--|--|-----------------|--|--|--|-----------------|--|--|--|-----------------|--|--|--|-----------------|--|--|--|-----------------|--|--|--|-----------------|--|--|--|-----------------|--|--|--|-----------------|--|--|--|-----------------|--|--|--|-----------------|--|--|--|-----------------|--|--|--|-----------------|--|--|--|-----------------|--|--|--|-----------------|--|--|--|-----------------|--|--|--|-----------------|--|--|--|-----------------|--|--|--|-----------------|--|--|--|-----------------|--|--|--|-----------------|--|--|--|-----------------|--|--|--|-----------------|--|--|--|-----------------|--|--|--|-----------------|--|--|--|-----------------|--|--|--|-----------------|--|--|--|-----------------|--|--|--|-----------------|--|--|--|-----------------|--|--|--|-----------------|--|--|--|-----------------|--|--|--|-----------------|--|--|--|-----------------|--|--|--|-----------------|--|--|--|-----------------|--|--|--|-----------------|--|--|--|-----------------|--|--|--|-----------------|--|--|--|-----------------|--|--|--|-----------------|--|--|--|-----------------|--|--|--|-----------------|--|--|--|-----------------|--|--|--|-----------------|--|--|--|-----------------|--|--|--|-----------------|--|--|--|-----------------|--|--|--|-----------------|--|--|--|-----------------|--|--|--|-----------------|--|--|--|-----------------|--|--|--|-----------------|--|--|--|-----------------|--|--|--|-----------------|--|--|--|-----------------|--|--|--|-----------------|--|--|--|-----------------|--|--|--|-----------------|--|--|--|-----------------|--|--|--|-----------------|--|--|--|-----------------|--|--|--|-----------------|--|--|--|-----------------|--|--|--|-----------------|--|--|--|-----------------|--|--|--|-----------------|--|--|--|-----------------|--|--|--|-----------------|--|--|--|-----------------|--|--|--|-----------------|--|--|--|-----------------|--|--|--|-----------------|--|--|--|-----------------|--|--|--|-----------------|--|--|--|-----------------|--|--|--|-----------------|--|--|--|-----------------|--|--|--|-----------------|--|--|--|-----------------|--|--|--|-----------------|--|--|--|-----------------|--|--|--|-----------------|--|--|--|-----------------|--|--|--|-----------------|--|--|--|-----------------|--|--|--|-----------------|--|--|--|-----------------|--|--|--|-----------------|--|--|--|-----------------|--|--|--|-----------------|--|--|--|-----------------|--|--|--|-----------------|--|--|--|-----------------|--|--|--|-----------------|--|--|--|-----------------|--|--|--|-----------------|--|--|--|-----------------|--|--|--|-----------------|--|--|--|-----------------|--|--|--|-----------------|--|--|--|-----------------|--|--|--|-----------------|--|--|--|-----------------|--|--|--|-----------------|--|--|--|-----------------|--|--|--|-----------------|--|--|--|-----------------|--|--|--|-----------------|--|--|--|-----------------|--|--|--|-----------------|--|--|--|-----------------|--|--|--|-----------------|--|--|--|-----------------|--|--|--|-----------------|--|--|--|-----------------|--|--|--|-----------------|--|--|--|-----------------|--|--|--|-----------------|--|--|--|-----------------|--|--|--|-----------------|--|--|--|-----------------|--|--|--|-----------------|--|--|--|-----------------|--|--|--|-----------------|--|--|--|-----------------|--|--|--|-----------------|--|--|--|-----------------|--|--|--|-----------------|--|--|--|-----------------|--|--|--|-----------------|--|--|--|-----------------|--|--|--|-----------------|--|--|--|-----------------|--|--|--|-----------------|--|--|--|-----------------|--|--|--|-----------------|--|--|--|-----------------|--|--|--|-----------------|--|--|--|-----------------|--|--|--|-----------------|--|--|--|-----------------|--|--|--|-----------------|--|--|--|-----------------|--|--|--|-----------------|--|--|--|-----------------|--|--|--|-----------------|--|--|--|-----------------|--|--|--|-----------------|--|--|--|-----------------|--|--|--|-----------------|--|--|--|-----------------|--|--|--|-----------------|--|--|--|-----------------|--|--|--|-----------------|--|--|--|-----------------|--|--|--|-----------------|--|--|--|-----------------|--|--|--|-----------------|--|--|--|-----------------|--|--|--|-----------------|--|--|--|-----------------|--|--|--|-----------------|--|--|--|-----------------|--|--|--|-----------------|--|--|--|-----------------|--|--|--|-----------------|--|--|--|-----------------|--|--|--|-----------------|--|--|--|-----------------|--|--|--|-----------------|--|--|--|-----------------|--|--|--|-----------------|--|--|--|-----------------|--|--|--|-----------------|--|--|--|-----------------|--|--|--|-----------------|--|--|--|-----------------|--|--|--|-----------------|--|--|--|-----------------|--|--|--|-----------------|--|--|--|-----------------|--|--|--|-----------------|--|--|--|-----------------|--|--|--|-----------------|--|--|--|-----------------|--|--|--|-----------------|--|--|--|-----------------|--|--|--|-----------------|--|--|--|-----------------|--|--|--|-----------------|--|--|--|-----------------|--|--|--|-----------------|--|--|--|-----------------|--|--|--|-----------------|--|--|--|-----------------|--|--|--|-----------------|--|--|--|-----------------|--|--|--|-----------------|--|--|--|-----------------|--|--|--|-----------------|--|--|--|-----------------|--|--|--|-----------------|--|--|--|-----------------|--|--|--|-----------------|--|--|--|-----------------|--|--|--|-----------------|--|--|--|-----------------|--|--|--|-----------------|--|--|--|-----------------|--|--|--|-----------------|--|--|--|-----------------|--|--|--|-----------------|--|--|--|-----------------|--|--|--|-----------------|--|--|--|-----------------|--|--|--|-----------------|--|--|--|-----------------|--|--|--|-----------------|--|--|--|-----------------|--|--|--|-----------------|--|--|--|-----------------|--|--|--|-----------------|--|--|--|-----------------|--|--|--|-----------------|--|--|--|-----------------|--|--|--|-----------------|--|--|--|-----------------|--|--|--|-----------------|--|--|--|-----------------|--|--|--|-----------------|--|--|--|-----------------|--|--|--|-----------------|--|--|--|-----------------|--|--|--|-----------------|--|--|--|-----------------|--|--|--|-----------------|--|--|--|-----------------|--|--|--|-----------------|--|--|--|-----------------|--|--|--|-----------------|--|--|--|-----------------|--|--|--|-----------------|--|--|--|-----------------|--|--|--|-----------------|--|--|--|-----------------|--|--|--|-----------------|--|--|--|-----------------|--|--|--|-----------------|--|--|--|-----------------|--|--|--|-----------------|--|--|--|-----------------|--|--|--|-----------------|--|--|--|-----------------|--|--|--|-----------------|--|--|--|-----------------|--|--|--|-----------------|--|--|--|-----------------|--|--|--|-----------------|--|--|--|-----------------|--|--|--|-----------------|--|--|--|-----------------|--|--|--|-----------------|--|--|--|-----------------|--|--|--|-----------------|--|--|--|-----------------|--|--|--|-----------------|--|--|--|-----------------|--|--|--|-----------------|--|--|--|-----------------|--|--|--|-----------------|--|--|--|-----------------|--|--|--|-----------------|--|--|--|-----------------|--|--|--|-----------------|--|--|--|-----------------|--|--|--|-----------------|--|--|--|-----------------|--|--|--|-----------------|--|--|--|-----------------|--|--|--|-----------------|--|--|--|-----------------|--|--|--|-----------------|--|--|--|-----------------|--|--|--|-----------------|--|--|--|-----------------|--|--|--|-----------------|--|--|--|-----------------|--|--|--|-----------------|--|--|--|-----------------|--|--|--|-----------------|--|--|--|-----------------|--|--|--|-----------------|--|--|--|-----------------|--|--|--|-----------------|--|--|--|-----------------|--|--|--|-----------------|--|--|--|-----------------|--|--|--|-----------------|--|--|--|-----------------|--|--|--|-----------------|--|--|--|-----------------|--|--|--|-----------------|--|--|--|-----------------|--|--|--|-----------------|--|--|--|-----------------|--|--|--|-----------------|--|--|--|-----------------|--|--|--|-----------------|--|--|--|-----------------|--|--|--|-----------------|--|--|--|-----------------|--|--|--|-----------------|--|--|--|-----------------|--|--|--|-----------------|--|--|--|-----------------|--|--|--|-----------------|--|--|--|-----------------|--|--|--|-----------------|--|--|--|-----------------|--|--|--|-----------------|--|--|--|-----------------|--|--|--|-----------------|--|--|--|-----------------|--|--|--|-----------------|--|--|--|-----------------|--|--|--|-----------------|--|--|--|-----------------|--|--|--|-----------------|--|--|--|-----------------|--|--|--|-----------------|--|--|--|-----------------|--|--|--|-----------------|--|--|--|-----------------|--|--|--|-----------------|--|--|--|-----------------|--|--|--|-----------------|--|--|--|-----------------|--|--|--|-----------------|--|--|--|-----------------|--|--|--|-----------------|--|--|--|-----------------|--|--|--|-----------------|--|--|--|-----------------|--|--|--|-----------------|--|--|--|-----------------|--|--|--|-----------------|--|--|--|-----------------|--|--|--|-----------------|--|--|--|-----------------|--|--|--|-----------------|--|--|--|-----------------|--|--|--|-----------------|--|--|--|-----------------|--|--|--|-----------------|--|--|--|-----------------|--|--|--|-----------------|--|--|--|-----------------|--|--|--|-----------------|--|--|--|-----------------|--|--|--|-----------------|--|--|--|-----------------|--|--|--|-----------------|--|--|--|-----------------|--|--|--|-----------------|--|--|--|-----------------|--|--|--|-----------------|--|--|--|-----------------|--|--|--|-----------------|--|--|--|-----------------|--|--|--|-----------------|--|--|--|-----------------|--|--|--|-----------------|--|--|--|-----------------|--|--|--|-----------------|--|--|--|-----------------|--|--|--|-----------------|--|--|--|-----------------|--|--|--|-----------------|--|--|--|-----------------|--|--|--|-----------------|--|--|--|-----------------|--|--|--|-----------------|--|--|--|-----------------|--|--|--|-----------------|--|--|--|-----------------|--|--|--|-----------------|--|--|--|-----------------|--|--|--|-----------------|--|--|--|-----------------|--|--|--|-----------------|--|--|--|-----------------|--|--|--|-----------------|--|--|--|-----------------|--|--|--|-----------------|--|--|--|-----------------|--|--|--|-----------------|--|--|--|-----------------|--|--|--|-----------------|--|--|--|-----------------|--|--|--|-----------------|--|--|--|-----------------|--|--|--|-----------------|--|--|--|-----------------|--|--|--|-----------------|--|--|--|-----------------|--|--|--|-----------------|--|--|--|-----------------|--|--|--|-----------------|--|--|--|-----------------|--|--|--|-----------------|--|--|--|-----------------|--|--|--|-----------------|--|--|--|-----------------|--|--|--|-----------------|--|--|--|-----------------|--|--|--|-----------------|--|--|--|-----------------|--|--|--|-----------------|--|--|--|-----------------|--|--|--|-----------------|--|--|--|-----------------|--|--|--|-----------------|--|--|--|-----------------|--|--|--|-----------------|--|--|--|-----------------|--|--|--|-----------------|--|--|--|-----------------|--|--|--|-----------------|--|--|--|-----------------|--|--|--|-----------------|--|--|--|-----------------|--|--|--|-----------------|--|--|--|-----------------|--|--|--|-----------------|--|--|--|-----------------|--|--|--|-----------------|--|--|--|-----------------|--|--|--|-----------------|--|--|--|-----------------|--|--|--|-----------------|--|--|--|-----------------|--|--|--|-----------------|--|--|--|-----------------|--|--|--|-----------------|--|--|--|-----------------|--|--|--|-----------------|--|--|--|-----------------|--|--|--|-----------------|--|--|--|-----------------|--|--|--|-----------------|--|--|--|-----------------|--|--|--|-----------------|--|--|--|-----------------|--|--|--|-----------------|--|--|--|-----------------|--|--|--|-----------------|--|--|--|-----------------|--|--|--|-----------------|--|--|--|-----------------|--|--|--|-----------------|--|--|--|-----------------|--|--|--|-----------------|--|--|--|-----------------|--|--|--|-----------------|--|--|--|-----------------|--|--|--|-----------------|--|--|--|-----------------|--|--|--|-----------------|--|--|--|-----------------|--|--|--|-----------------|--|--|--|-----------------|--|--|--|-----------------|--|--|--|-----------------|--|--|--|-----------------|--|--|--|-----------------|--|--|--|-----------------|--|--|--|-----------------|--|--|--|-----------------|--|--|--|-----------------|--|--|--|-----------------|--|--|--|-----------------|--|--|--|-----------------|--|--|--|-----------------|--|--|--|-----------------|--|--|--|------------------|--|--|--|
|---------|-----------------|--|--|--|-----------------|--|--|--|-----------------|--|--|--|-----------------|--|--|--|-----------------|--|--|--|-----------------|--|--|--|-----------------|--|--|--|-----------------|--|--|--|-----------------|--|--|--|-----------------|--|--|--|-----------------|--|--|--|-----------------|--|--|--|-----------------|--|--|--|-----------------|--|--|--|-----------------|--|--|--|-----------------|--|--|--|-----------------|--|--|--|-----------------|--|--|--|-----------------|--|--|--|-----------------|--|--|--|-----------------|--|--|--|-----------------|--|--|--|-----------------|--|--|--|-----------------|--|--|--|-----------------|--|--|--|-----------------|--|--|--|-----------------|--|--|--|-----------------|--|--|--|-----------------|--|--|--|-----------------|--|--|--|-----------------|--|--|--|-----------------|--|--|--|-----------------|--|--|--|-----------------|--|--|--|-----------------|--|--|--|-----------------|--|--|--|-----------------|--|--|--|-----------------|--|--|--|-----------------|--|--|--|-----------------|--|--|--|-----------------|--|--|--|-----------------|--|--|--|-----------------|--|--|--|-----------------|--|--|--|-----------------|--|--|--|-----------------|--|--|--|-----------------|--|--|--|-----------------|--|--|--|-----------------|--|--|--|-----------------|--|--|--|-----------------|--|--|--|-----------------|--|--|--|-----------------|--|--|--|-----------------|--|--|--|-----------------|--|--|--|-----------------|--|--|--|-----------------|--|--|--|-----------------|--|--|--|-----------------|--|--|--|-----------------|--|--|--|-----------------|--|--|--|-----------------|--|--|--|-----------------|--|--|--|-----------------|--|--|--|-----------------|--|--|--|-----------------|--|--|--|-----------------|--|--|--|-----------------|--|--|--|-----------------|--|--|--|-----------------|--|--|--|-----------------|--|--|--|-----------------|--|--|--|-----------------|--|--|--|-----------------|--|--|--|-----------------|--|--|--|-----------------|--|--|--|-----------------|--|--|--|-----------------|--|--|--|-----------------|--|--|--|-----------------|--|--|--|-----------------|--|--|--|-----------------|--|--|--|-----------------|--|--|--|-----------------|--|--|--|-----------------|--|--|--|-----------------|--|--|--|-----------------|--|--|--|-----------------|--|--|--|-----------------|--|--|--|-----------------|--|--|--|-----------------|--|--|--|-----------------|--|--|--|-----------------|--|--|--|-----------------|--|--|--|-----------------|--|--|--|-----------------|--|--|--|-----------------|--|--|--|-----------------|--|--|--|-----------------|--|--|--|-----------------|--|--|--|-----------------|--|--|--|-----------------|--|--|--|-----------------|--|--|--|-----------------|--|--|--|-----------------|--|--|--|-----------------|--|--|--|-----------------|--|--|--|-----------------|--|--|--|-----------------|--|--|--|-----------------|--|--|--|-----------------|--|--|--|-----------------|--|--|--|-----------------|--|--|--|-----------------|--|--|--|-----------------|--|--|--|-----------------|--|--|--|-----------------|--|--|--|-----------------|--|--|--|-----------------|--|--|--|-----------------|--|--|--|-----------------|--|--|--|-----------------|--|--|--|-----------------|--|--|--|-----------------|--|--|--|-----------------|--|--|--|-----------------|--|--|--|-----------------|--|--|--|-----------------|--|--|--|-----------------|--|--|--|-----------------|--|--|--|-----------------|--|--|--|-----------------|--|--|--|-----------------|--|--|--|-----------------|--|--|--|-----------------|--|--|--|-----------------|--|--|--|-----------------|--|--|--|-----------------|--|--|--|-----------------|--|--|--|-----------------|--|--|--|-----------------|--|--|--|-----------------|--|--|--|-----------------|--|--|--|-----------------|--|--|--|-----------------|--|--|--|-----------------|--|--|--|-----------------|--|--|--|-----------------|--|--|--|-----------------|--|--|--|-----------------|--|--|--|-----------------|--|--|--|-----------------|--|--|--|-----------------|--|--|--|-----------------|--|--|--|-----------------|--|--|--|-----------------|--|--|--|-----------------|--|--|--|-----------------|--|--|--|-----------------|--|--|--|-----------------|--|--|--|-----------------|--|--|--|-----------------|--|--|--|-----------------|--|--|--|-----------------|--|--|--|-----------------|--|--|--|-----------------|--|--|--|-----------------|--|--|--|-----------------|--|--|--|-----------------|--|--|--|-----------------|--|--|--|-----------------|--|--|--|-----------------|--|--|--|-----------------|--|--|--|-----------------|--|--|--|-----------------|--|--|--|-----------------|--|--|--|-----------------|--|--|--|-----------------|--|--|--|-----------------|--|--|--|-----------------|--|--|--|-----------------|--|--|--|-----------------|--|--|--|-----------------|--|--|--|-----------------|--|--|--|-----------------|--|--|--|-----------------|--|--|--|-----------------|--|--|--|-----------------|--|--|--|-----------------|--|--|--|-----------------|--|--|--|-----------------|--|--|--|-----------------|--|--|--|-----------------|--|--|--|-----------------|--|--|--|-----------------|--|--|--|-----------------|--|--|--|-----------------|--|--|--|-----------------|--|--|--|-----------------|--|--|--|-----------------|--|--|--|-----------------|--|--|--|-----------------|--|--|--|-----------------|--|--|--|-----------------|--|--|--|-----------------|--|--|--|-----------------|--|--|--|-----------------|--|--|--|-----------------|--|--|--|-----------------|--|--|--|-----------------|--|--|--|-----------------|--|--|--|-----------------|--|--|--|-----------------|--|--|--|-----------------|--|--|--|-----------------|--|--|--|-----------------|--|--|--|-----------------|--|--|--|-----------------|--|--|--|-----------------|--|--|--|-----------------|--|--|--|-----------------|--|--|--|-----------------|--|--|--|-----------------|--|--|--|-----------------|--|--|--|-----------------|--|--|--|-----------------|--|--|--|-----------------|--|--|--|-----------------|--|--|--|-----------------|--|--|--|-----------------|--|--|--|-----------------|--|--|--|-----------------|--|--|--|-----------------|--|--|--|-----------------|--|--|--|-----------------|--|--|--|-----------------|--|--|--|-----------------|--|--|--|-----------------|--|--|--|-----------------|--|--|--|-----------------|--|--|--|-----------------|--|--|--|-----------------|--|--|--|-----------------|--|--|--|-----------------|--|--|--|-----------------|--|--|--|-----------------|--|--|--|-----------------|--|--|--|-----------------|--|--|--|-----------------|--|--|--|-----------------|--|--|--|-----------------|--|--|--|-----------------|--|--|--|-----------------|--|--|--|-----------------|--|--|--|-----------------|--|--|--|-----------------|--|--|--|-----------------|--|--|--|-----------------|--|--|--|-----------------|--|--|--|-----------------|--|--|--|-----------------|--|--|--|-----------------|--|--|--|-----------------|--|--|--|-----------------|--|--|--|-----------------|--|--|--|-----------------|--|--|--|-----------------|--|--|--|-----------------|--|--|--|-----------------|--|--|--|-----------------|--|--|--|-----------------|--|--|--|-----------------|--|--|--|-----------------|--|--|--|-----------------|--|--|--|-----------------|--|--|--|-----------------|--|--|--|-----------------|--|--|--|-----------------|--|--|--|-----------------|--|--|--|-----------------|--|--|--|-----------------|--|--|--|-----------------|--|--|--|-----------------|--|--|--|-----------------|--|--|--|-----------------|--|--|--|-----------------|--|--|--|-----------------|--|--|--|-----------------|--|--|--|-----------------|--|--|--|-----------------|--|--|--|-----------------|--|--|--|-----------------|--|--|--|-----------------|--|--|--|-----------------|--|--|--|-----------------|--|--|--|-----------------|--|--|--|-----------------|--|--|--|-----------------|--|--|--|-----------------|--|--|--|-----------------|--|--|--|-----------------|--|--|--|-----------------|--|--|--|-----------------|--|--|--|-----------------|--|--|--|-----------------|--|--|--|-----------------|--|--|--|-----------------|--|--|--|-----------------|--|--|--|-----------------|--|--|--|-----------------|--|--|--|-----------------|--|--|--|-----------------|--|--|--|-----------------|--|--|--|-----------------|--|--|--|-----------------|--|--|--|-----------------|--|--|--|-----------------|--|--|--|-----------------|--|--|--|-----------------|--|--|--|-----------------|--|--|--|-----------------|--|--|--|-----------------|--|--|--|-----------------|--|--|--|-----------------|--|--|--|-----------------|--|--|--|-----------------|--|--|--|-----------------|--|--|--|-----------------|--|--|--|-----------------|--|--|--|-----------------|--|--|--|-----------------|--|--|--|-----------------|--|--|--|-----------------|--|--|--|-----------------|--|--|--|-----------------|--|--|--|-----------------|--|--|--|-----------------|--|--|--|-----------------|--|--|--|-----------------|--|--|--|-----------------|--|--|--|-----------------|--|--|--|-----------------|--|--|--|-----------------|--|--|--|-----------------|--|--|--|-----------------|--|--|--|-----------------|--|--|--|-----------------|--|--|--|-----------------|--|--|--|-----------------|--|--|--|-----------------|--|--|--|-----------------|--|--|--|-----------------|--|--|--|-----------------|--|--|--|-----------------|--|--|--|-----------------|--|--|--|-----------------|--|--|--|-----------------|--|--|--|-----------------|--|--|--|-----------------|--|--|--|-----------------|--|--|--|-----------------|--|--|--|-----------------|--|--|--|-----------------|--|--|--|-----------------|--|--|--|-----------------|--|--|--|-----------------|--|--|--|-----------------|--|--|--|-----------------|--|--|--|-----------------|--|--|--|-----------------|--|--|--|-----------------|--|--|--|-----------------|--|--|--|-----------------|--|--|--|-----------------|--|--|--|-----------------|--|--|--|-----------------|--|--|--|-----------------|--|--|--|-----------------|--|--|--|-----------------|--|--|--|-----------------|--|--|--|-----------------|--|--|--|-----------------|--|--|--|-----------------|--|--|--|-----------------|--|--|--|-----------------|--|--|--|-----------------|--|--|--|-----------------|--|--|--|-----------------|--|--|--|-----------------|--|--|--|-----------------|--|--|--|-----------------|--|--|--|-----------------|--|--|--|-----------------|--|--|--|-----------------|--|--|--|-----------------|--|--|--|-----------------|--|--|--|-----------------|--|--|--|-----------------|--|--|--|-----------------|--|--|--|-----------------|--|--|--|-----------------|--|--|--|-----------------|--|--|--|-----------------|--|--|--|-----------------|--|--|--|-----------------|--|--|--|-----------------|--|--|--|-----------------|--|--|--|-----------------|--|--|--|-----------------|--|--|--|-----------------|--|--|--|-----------------|--|--|--|-----------------|--|--|--|-----------------|--|--|--|-----------------|--|--|--|-----------------|--|--|--|-----------------|--|--|--|-----------------|--|--|--|-----------------|--|--|--|-----------------|--|--|--|-----------------|--|--|--|-----------------|--|--|--|-----------------|--|--|--|-----------------|--|--|--|-----------------|--|--|--|-----------------|--|--|--|-----------------|--|--|--|-----------------|--|--|--|-----------------|--|--|--|-----------------|--|--|--|-----------------|--|--|--|-----------------|--|--|--|-----------------|--|--|--|-----------------|--|--|--|-----------------|--|--|--|-----------------|--|--|--|-----------------|--|--|--|-----------------|--|--|--|-----------------|--|--|--|-----------------|--|--|--|-----------------|--|--|--|-----------------|--|--|--|-----------------|--|--|--|-----------------|--|--|--|-----------------|--|--|--|-----------------|--|--|--|-----------------|--|--|--|-----------------|--|--|--|-----------------|--|--|--|-----------------|--|--|--|-----------------|--|--|--|-----------------|--|--|--|-----------------|--|--|--|-----------------|--|--|--|-----------------|--|--|--|-----------------|--|--|--|-----------------|--|--|--|-----------------|--|--|--|-----------------|--|--|--|-----------------|--|--|--|-----------------|--|--|--|-----------------|--|--|--|-----------------|--|--|--|-----------------|--|--|--|-----------------|--|--|--|-----------------|--|--|--|-----------------|--|--|--|-----------------|--|--|--|-----------------|--|--|--|-----------------|--|--|--|-----------------|--|--|--|-----------------|--|--|--|-----------------|--|--|--|-----------------|--|--|--|-----------------|--|--|--|-----------------|--|--|--|-----------------|--|--|--|-----------------|--|--|--|-----------------|--|--|--|-----------------|--|--|--|-----------------|--|--|--|-----------------|--|--|--|-----------------|--|--|--|-----------------|--|--|--|-----------------|--|--|--|-----------------|--|--|--|-----------------|--|--|--|-----------------|--|--|--|-----------------|--|--|--|-----------------|--|--|--|-----------------|--|--|--|-----------------|--|--|--|-----------------|--|--|--|-----------------|--|--|--|-----------------|--|--|--|-----------------|--|--|--|-----------------|--|--|--|-----------------|--|--|--|-----------------|--|--|--|-----------------|--|--|--|-----------------|--|--|--|-----------------|--|--|--|-----------------|--|--|--|-----------------|--|--|--|-----------------|--|--|--|-----------------|--|--|--|-----------------|--|--|--|-----------------|--|--|--|-----------------|--|--|--|-----------------|--|--|--|-----------------|--|--|--|-----------------|--|--|--|-----------------|--|--|--|-----------------|--|--|--|-----------------|--|--|--|-----------------|--|--|--|-----------------|--|--|--|-----------------|--|--|--|-----------------|--|--|--|-----------------|--|--|--|-----------------|--|--|--|-----------------|--|--|--|-----------------|--|--|--|-----------------|--|--|--|-----------------|--|--|--|-----------------|--|--|--|-----------------|--|--|--|-----------------|--|--|--|-----------------|--|--|--|-----------------|--|--|--|-----------------|--|--|--|-----------------|--|--|--|-----------------|--|--|--|-----------------|--|--|--|-----------------|--|--|--|-----------------|--|--|--|-----------------|--|--|--|-----------------|--|--|--|-----------------|--|--|--|-----------------|--|--|--|-----------------|--|--|--|-----------------|--|--|--|-----------------|--|--|--|-----------------|--|--|--|-----------------|--|--|--|-----------------|--|--|--|-----------------|--|--|--|-----------------|--|--|--|-----------------|--|--|--|-----------------|--|--|--|-----------------|--|--|--|-----------------|--|--|--|-----------------|--|--|--|-----------------|--|--|--|-----------------|--|--|--|-----------------|--|--|--|-----------------|--|--|--|-----------------|--|--|--|-----------------|--|--|--|-----------------|--|--|--|-----------------|--|--|--|-----------------|--|--|--|-----------------|--|--|--|-----------------|--|--|--|-----------------|--|--|--|-----------------|--|--|--|-----------------|--|--|--|-----------------|--|--|--|-----------------|--|--|--|-----------------|--|--|--|-----------------|--|--|--|-----------------|--|--|--|-----------------|--|--|--|-----------------|--|--|--|-----------------|--|--|--|-----------------|--|--|--|-----------------|--|--|--|-----------------|--|--|--|-----------------|--|--|--|-----------------|--|--|--|-----------------|--|--|--|-----------------|--|--|--|-----------------|--|--|--|-----------------|--|--|--|-----------------|--|--|--|-----------------|--|--|--|-----------------|--|--|--|-----------------|--|--|--|-----------------|--|--|--|-----------------|--|--|--|-----------------|--|--|--|-----------------|--|--|--|-----------------|--|--|--|-----------------|--|--|--|-----------------|--|--|--|-----------------|--|--|--|-----------------|--|--|--|-----------------|--|--|--|-----------------|--|--|--|-----------------|--|--|--|-----------------|--|--|--|-----------------|--|--|--|-----------------|--|--|--|-----------------|--|--|--|-----------------|--|--|--|-----------------|--|--|--|-----------------|--|--|--|-----------------|--|--|--|-----------------|--|--|--|-----------------|--|--|--|-----------------|--|--|--|-----------------|--|--|--|-----------------|--|--|--|-----------------|--|--|--|-----------------|--|--|--|-----------------|--|--|--|-----------------|--|--|--|-----------------|--|--|--|-----------------|--|--|--|-----------------|--|--|--|-----------------|--|--|--|-----------------|--|--|--|-----------------|--|--|--|-----------------|--|--|--|-----------------|--|--|--|-----------------|--|--|--|-----------------|--|--|--|-----------------|--|--|--|-----------------|--|--|--|-----------------|--|--|--|-----------------|--|--|--|-----------------|--|--|--|-----------------|--|--|--|-----------------|--|--|--|-----------------|--|--|--|-----------------|--|--|--|-----------------|--|--|--|-----------------|--|--|--|-----------------|--|--|--|-----------------|--|--|--|-----------------|--|--|--|-----------------|--|--|--|-----------------|--|--|--|-----------------|--|--|--|-----------------|--|--|--|-----------------|--|--|--|-----------------|--|--|--|-----------------|--|--|--|-----------------|--|--|--|-----------------|--|--|--|-----------------|--|--|--|-----------------|--|--|--|-----------------|--|--|--|-----------------|--|--|--|-----------------|--|--|--|-----------------|--|--|--|-----------------|--|--|--|-----------------|--|--|--|-----------------|--|--|--|-----------------|--|--|--|-----------------|--|--|--|-----------------|--|--|--|-----------------|--|--|--|-----------------|--|--|--|-----------------|--|--|--|-----------------|--|--|--|-----------------|--|--|--|-----------------|--|--|--|-----------------|--|--|--|-----------------|--|--|--|-----------------|--|--|--|-----------------|--|--|--|-----------------|--|--|--|-----------------|--|--|--|-----------------|--|--|--|-----------------|--|--|--|-----------------|--|--|--|-----------------|--|--|--|-----------------|--|--|--|-----------------|--|--|--|-----------------|--|--|--|-----------------|--|--|--|-----------------|--|--|--|-----------------|--|--|--|-----------------|--|--|--|-----------------|--|--|--|-----------------|--|--|--|-----------------|--|--|--|-----------------|--|--|--|-----------------|--|--|--|-----------------|--|--|--|-----------------|--|--|--|-----------------|--|--|--|-----------------|--|--|--|-----------------|--|--|--|-----------------|--|--|--|-----------------|--|--|--|-----------------|--|--|--|-----------------|--|--|--|-----------------|--|--|--|-----------------|--|--|--|-----------------|--|--|--|-----------------|--|--|--|-----------------|--|--|--|-----------------|--|--|--|-----------------|--|--|--|-----------------|--|--|--|-----------------|--|--|--|-----------------|--|--|--|-----------------|--|--|--|-----------------|--|--|--|-----------------|--|--|--|-----------------|--|--|--|-----------------|--|--|--|-----------------|--|--|--|-----------------|--|--|--|-----------------|--|--|--|-----------------|--|--|--|-----------------|--|--|--|-----------------|--|--|--|-----------------|--|--|--|-----------------|--|--|--|-----------------|--|--|--|-----------------|--|--|--|-----------------|--|--|--|-----------------|--|--|--|-----------------|--|--|--|-----------------|--|--|--|-----------------|--|--|--|-----------------|--|--|--|-----------------|--|--|--|-----------------|--|--|--|-----------------|--|--|--|-----------------|--|--|--|-----------------|--|--|--|-----------------|--|--|--|-----------------|--|--|--|-----------------|--|--|--|-----------------|--|--|--|-----------------|--|--|--|-----------------|--|--|--|-----------------|--|--|--|-----------------|--|--|--|-----------------|--|--|--|-----------------|--|--|--|-----------------|--|--|--|-----------------|--|--|--|-----------------|--|--|--|-----------------|--|--|--|-----------------|--|--|--|-----------------|--|--|--|-----------------|--|--|--|-----------------|--|--|--|-----------------|--|--|--|-----------------|--|--|--|-----------------|--|--|--|-----------------|--|--|--|-----------------|--|--|--|-----------------|--|--|--|-----------------|--|--|--|-----------------|--|--|--|-----------------|--|--|--|-----------------|--|--|--|-----------------|--|--|--|-----------------|--|--|--|-----------------|--|--|--|-----------------|--|--|--|-----------------|--|--|--|-----------------|--|--|--|-----------------|--|--|--|-----------------|--|--|--|-----------------|--|--|--|-----------------|--|--|--|-----------------|--|--|--|-----------------|--|--|--|-----------------|--|--|--|-----------------|--|--|--|-----------------|--|--|--|-----------------|--|--|--|-----------------|--|--|--|-----------------|--|--|--|-----------------|--|--|--|-----------------|--|--|--|-----------------|--|--|--|-----------------|--|--|--|-----------------|--|--|--|-----------------|--|--|--|-----------------|--|--|--|-----------------|--|--|--|-----------------|--|--|--|-----------------|--|--|--|-----------------|--|--|--|-----------------|--|--|--|-----------------|--|--|--|-----------------|--|--|--|-----------------|--|--|--|-----------------|--|--|--|-----------------|--|--|--|-----------------|--|--|--|-----------------|--|--|--|-----------------|--|--|--|-----------------|--|--|--|-----------------|--|--|--|-----------------|--|--|--|-----------------|--|--|--|-----------------|--|--|--|-----------------|--|--|--|-----------------|--|--|--|-----------------|--|--|--|-----------------|--|--|--|-----------------|--|--|--|-----------------|--|--|--|-----------------|--|--|--|-----------------|--|--|--|-----------------|--|--|--|-----------------|--|--|--|-----------------|--|--|--|-----------------|--|--|--|-----------------|--|--|--|-----------------|--|--|--|-----------------|--|--|--|-----------------|--|--|--|-----------------|--|--|--|-----------------|--|--|--|-----------------|--|--|--|-----------------|--|--|--|-----------------|--|--|--|-----------------|--|--|--|-----------------|--|--|--|-----------------|--|--|--|-----------------|--|--|--|-----------------|--|--|--|-----------------|--|--|--|-----------------|--|--|--|-----------------|--|--|--|-----------------|--|--|--|-----------------|--|--|--|-----------------|--|--|--|-----------------|--|--|--|------------------|--|--|--|

File: ESM\_10 (Online Resource 10)

Title: Comparative Multidimensional Molecular Analyses of Pediatric Diffuse Intrinsic Piloile Gloma Reveals Distinct Molecular Subtypes  
Journal: Acta Neuropathologica

Authors: Amanda M. Stransik, Madhuri Kumbhakar, Kendall Snyder, Sidique Yavuz, Joe Devenney, Brennan Harmon, Jordan Hall, Eric H. Raabe, Ping An, Melanie Weingart, Brian Ross, Sarah Magee, Roger J. Packer, Javad Nazarian

Corresponding Author:

Javad Nazarian, Children's National Medical Center, Center for Genetic Medicine  
111 Michigan Ave., NW, Washington DC, 20010  
Phone: 202-476-6022 Fax: 202-476-6014  
Email: J.Nazarian@CNMC.org

| Gene ID | p-value | Meantatio | FoldChang |
|---------|---------|-----------|-----------|---------|-----------|-----------|---------|-----------|-----------|---------|-----------|-----------|---------|-----------|-----------|---------|-----------|-----------|---------|-----------|-----------|---------|-----------|-----------|---------|-----------|-----------|---------|-----------|-----------|---------|-----------|-----------|---------|-----------|-----------|---------|-----------|-----------|---------|-----------|-----------|---------|-----------|-----------|---------|-----------|-----------|---------|-----------|-----------|---------|-----------|-----------|---------|-----------|-----------|---------|-----------|-----------|---------|-----------|-----------|---------|-----------|-----------|---------|-----------|-----------|---------|-----------|-----------|---------|-----------|-----------|---------|-----------|-----------|---------|-----------|-----------|---------|-----------|-----------|---------|-----------|-----------|---------|-----------|-----------|---------|-----------|-----------|---------|-----------|-----------|---------|-----------|-----------|---------|-----------|-----------|---------|-----------|-----------|---------|-----------|-----------|---------|-----------|-----------|---------|-----------|-----------|---------|-----------|-----------|---------|-----------|-----------|---------|-----------|-----------|---------|-----------|-----------|---------|-----------|-----------|---------|-----------|-----------|---------|-----------|-----------|---------|-----------|-----------|---------|-----------|-----------|---------|-----------|-----------|---------|-----------|-----------|---------|-----------|-----------|---------|-----------|-----------|---------|-----------|-----------|---------|-----------|-----------|---------|-----------|-----------|---------|-----------|-----------|---------|-----------|-----------|---------|-----------|-----------|---------|-----------|-----------|---------|-----------|-----------|---------|-----------|-----------|---------|-----------|-----------|---------|-----------|-----------|---------|-----------|-----------|---------|-----------|-----------|---------|-----------|-----------|---------|-----------|-----------|---------|-----------|-----------|---------|-----------|-----------|---------|-----------|-----------|---------|-----------|-----------|---------|-----------|-----------|---------|-----------|-----------|---------|-----------|-----------|---------|-----------|-----------|---------|-----------|-----------|---------|-----------|-----------|---------|-----------|-----------|---------|-----------|-----------|---------|-----------|-----------|---------|-----------|-----------|---------|-----------|-----------|---------|-----------|-----------|---------|-----------|-----------|---------|-----------|-----------|---------|-----------|-----------|---------|-----------|-----------|---------|-----------|-----------|---------|-----------|-----------|---------|-----------|-----------|---------|-----------|-----------|---------|-----------|-----------|---------|-----------|-----------|---------|-----------|-----------|---------|-----------|-----------|---------|-----------|-----------|---------|-----------|-----------|---------|-----------|-----------|---------|-----------|-----------|---------|-----------|-----------|---------|-----------|-----------|---------|-----------|-----------|---------|-----------|-----------|---------|-----------|-----------|---------|-----------|-----------|---------|-----------|-----------|---------|-----------|-----------|---------|-----------|-----------|---------|-----------|-----------|---------|-----------|-----------|---------|-----------|-----------|---------|-----------|-----------|---------|-----------|-----------|---------|-----------|-----------|---------|-----------|-----------|---------|-----------|-----------|---------|-----------|-----------|---------|-----------|-----------|---------|-----------|-----------|---------|-----------|-----------|---------|-----------|-----------|---------|-----------|-----------|---------|-----------|-----------|---------|-----------|-----------|---------|-----------|-----------|---------|-----------|-----------|---------|-----------|-----------|---------|-----------|-----------|---------|-----------|-----------|---------|-----------|-----------|---------|-----------|-----------|---------|-----------|-----------|---------|-----------|-----------|---------|-----------|-----------|---------|-----------|-----------|---------|-----------|-----------|---------|-----------|-----------|---------|-----------|-----------|---------|-----------|-----------|---------|-----------|-----------|---------|-----------|-----------|---------|-----------|-----------|---------|-----------|-----------|---------|-----------|-----------|---------|-----------|-----------|---------|-----------|-----------|---------|-----------|-----------|---------|-----------|-----------|---------|-----------|-----------|---------|-----------|-----------|---------|-----------|-----------|---------|-----------|-----------|---------|-----------|-----------|---------|-----------|-----------|---------|-----------|-----------|---------|-----------|-----------|---------|-----------|-----------|---------|-----------|-----------|---------|-----------|-----------|---------|-----------|-----------|---------|-----------|-----------|---------|-----------|-----------|---------|-----------|-----------|---------|-----------|-----------|---------|-----------|-----------|---------|-----------|-----------|---------|-----------|-----------|---------|-----------|-----------|---------|-----------|-----------|---------|-----------|-----------|---------|-----------|-----------|---------|-----------|-----------|---------|-----------|-----------|---------|-----------|-----------|---------|-----------|-----------|---------|-----------|-----------|---------|-----------|-----------|---------|-----------|-----------|---------|-----------|-----------|---------|-----------|-----------|---------|-----------|-----------|---------|-----------|-----------|---------|-----------|-----------|---------|-----------|-----------|---------|-----------|-----------|---------|-----------|-----------|---------|-----------|-----------|---------|-----------|-----------|---------|-----------|-----------|---------|-----------|-----------|---------|-----------|-----------|---------|-----------|-----------|---------|-----------|-----------|---------|-----------|-----------|---------|-----------|-----------|---------|-----------|-----------|---------|-----------|-----------|---------|-----------|-----------|---------|-----------|-----------|---------|-----------|-----------|---------|-----------|-----------|---------|-----------|-----------|---------|-----------|-----------|---------|-----------|-----------|---------|-----------|-----------|---------|-----------|-----------|---------|-----------|-----------|---------|-----------|-----------|---------|-----------|-----------|---------|-----------|-----------|---------|-----------|-----------|---------|-----------|-----------|---------|-----------|-----------|---------|-----------|-----------|---------|-----------|-----------|---------|-----------|-----------|---------|-----------|-----------|---------|-----------|-----------|---------|-----------|-----------|---------|-----------|-----------|---------|-----------|-----------|---------|-----------|-----------|---------|-----------|-----------|---------|-----------|-----------|---------|-----------|-----------|---------|-----------|-----------|---------|-----------|-----------|---------|-----------|-----------|---------|-----------|-----------|---------|-----------|-----------|---------|-----------|-----------|---------|-----------|-----------|---------|-----------|-----------|---------|-----------|-----------|---------|-----------|-----------|---------|-----------|-----------|---------|-----------|-----------|---------|-----------|-----------|---------|-----------|-----------|---------|-----------|-----------|---------|-----------|-----------|---------|-----------|-----------|---------|-----------|-----------|---------|-----------|-----------|---------|-----------|-----------|---------|-----------|-----------|---------|-----------|-----------|---------|-----------|-----------|---------|-----------|-----------|---------|-----------|-----------|---------|-----------|-----------|---------|-----------|-----------|---------|-----------|-----------|---------|-----------|-----------|---------|-----------|-----------|---------|-----------|-----------|---------|-----------|-----------|---------|-----------|-----------|---------|-----------|-----------|---------|-----------|-----------|---------|-----------|-----------|---------|-----------|-----------|---------|-----------|-----------|---------|-----------|-----------|---------|-----------|-----------|---------|-----------|-----------|---------|-----------|-----------|---------|-----------|-----------|---------|-----------|-----------|---------|-----------|-----------|---------|-----------|-----------|---------|-----------|-----------|---------|-----------|-----------|---------|-----------|-----------|---------|-----------|-----------|---------|-----------|-----------|---------|-----------|-----------|---------|-----------|-----------|---------|-----------|-----------|---------|-----------|-----------|---------|-----------|-----------|---------|-----------|-----------|---------|-----------|-----------|---------|-----------|-----------|---------|-----------|-----------|---------|-----------|-----------|---------|-----------|-----------|---------|-----------|-----------|---------|-----------|-----------|---------|-----------|-----------|---------|-----------|-----------|---------|-----------|-----------|---------|-----------|-----------|---------|-----------|-----------|---------|-----------|-----------|---------|-----------|-----------|---------|-----------|-----------|---------|-----------|-----------|---------|-----------|-----------|---------|-----------|-----------|---------|-----------|-----------|---------|-----------|-----------|---------|-----------|-----------|---------|-----------|-----------|---------|-----------|-----------|---------|-----------|-----------|---------|-----------|-----------|---------|-----------|-----------|---------|-----------|-----------|---------|-----------|-----------|---------|-----------|-----------|---------|-----------|-----------|---------|-----------|-----------|---------|-----------|-----------|---------|-----------|-----------|---------|-----------|-----------|---------|-----------|-----------|---------|-----------|-----------|---------|-----------|-----------|---------|-----------|-----------|---------|-----------|-----------|---------|-----------|-----------|---------|-----------|-----------|---------|-----------|-----------|---------|-----------|-----------|---------|-----------|-----------|---------|-----------|-----------|---------|-----------|-----------|---------|-----------|-----------|---------|-----------|-----------|---------|-----------|-----------|
|---------|---------|-----------|-----------|---------|-----------|-----------|---------|-----------|-----------|---------|-----------|-----------|---------|-----------|-----------|---------|-----------|-----------|---------|-----------|-----------|---------|-----------|-----------|---------|-----------|-----------|---------|-----------|-----------|---------|-----------|-----------|---------|-----------|-----------|---------|-----------|-----------|---------|-----------|-----------|---------|-----------|-----------|---------|-----------|-----------|---------|-----------|-----------|---------|-----------|-----------|---------|-----------|-----------|---------|-----------|-----------|---------|-----------|-----------|---------|-----------|-----------|---------|-----------|-----------|---------|-----------|-----------|---------|-----------|-----------|---------|-----------|-----------|---------|-----------|-----------|---------|-----------|-----------|---------|-----------|-----------|---------|-----------|-----------|---------|-----------|-----------|---------|-----------|-----------|---------|-----------|-----------|---------|-----------|-----------|---------|-----------|-----------|---------|-----------|-----------|---------|-----------|-----------|---------|-----------|-----------|---------|-----------|-----------|---------|-----------|-----------|---------|-----------|-----------|---------|-----------|-----------|---------|-----------|-----------|---------|-----------|-----------|---------|-----------|-----------|---------|-----------|-----------|---------|-----------|-----------|---------|-----------|-----------|---------|-----------|-----------|---------|-----------|-----------|---------|-----------|-----------|---------|-----------|-----------|---------|-----------|-----------|---------|-----------|-----------|---------|-----------|-----------|---------|-----------|-----------|---------|-----------|-----------|---------|-----------|-----------|---------|-----------|-----------|---------|-----------|-----------|---------|-----------|-----------|---------|-----------|-----------|---------|-----------|-----------|---------|-----------|-----------|---------|-----------|-----------|---------|-----------|-----------|---------|-----------|-----------|---------|-----------|-----------|---------|-----------|-----------|---------|-----------|-----------|---------|-----------|-----------|---------|-----------|-----------|---------|-----------|-----------|---------|-----------|-----------|---------|-----------|-----------|---------|-----------|-----------|---------|-----------|-----------|---------|-----------|-----------|---------|-----------|-----------|---------|-----------|-----------|---------|-----------|-----------|---------|-----------|-----------|---------|-----------|-----------|---------|-----------|-----------|---------|-----------|-----------|---------|-----------|-----------|---------|-----------|-----------|---------|-----------|-----------|---------|-----------|-----------|---------|-----------|-----------|---------|-----------|-----------|---------|-----------|-----------|---------|-----------|-----------|---------|-----------|-----------|---------|-----------|-----------|---------|-----------|-----------|---------|-----------|-----------|---------|-----------|-----------|---------|-----------|-----------|---------|-----------|-----------|---------|-----------|-----------|---------|-----------|-----------|---------|-----------|-----------|---------|-----------|-----------|---------|-----------|-----------|---------|-----------|-----------|---------|-----------|-----------|---------|-----------|-----------|---------|-----------|-----------|---------|-----------|-----------|---------|-----------|-----------|---------|-----------|-----------|---------|-----------|-----------|---------|-----------|-----------|---------|-----------|-----------|---------|-----------|-----------|---------|-----------|-----------|---------|-----------|-----------|---------|-----------|-----------|---------|-----------|-----------|---------|-----------|-----------|---------|-----------|-----------|---------|-----------|-----------|---------|-----------|-----------|---------|-----------|-----------|---------|-----------|-----------|---------|-----------|-----------|---------|-----------|-----------|---------|-----------|-----------|---------|-----------|-----------|---------|-----------|-----------|---------|-----------|-----------|---------|-----------|-----------|---------|-----------|-----------|---------|-----------|-----------|---------|-----------|-----------|---------|-----------|-----------|---------|-----------|-----------|---------|-----------|-----------|---------|-----------|-----------|---------|-----------|-----------|---------|-----------|-----------|---------|-----------|-----------|---------|-----------|-----------|---------|-----------|-----------|---------|-----------|-----------|---------|-----------|-----------|---------|-----------|-----------|---------|-----------|-----------|---------|-----------|-----------|---------|-----------|-----------|---------|-----------|-----------|---------|-----------|-----------|---------|-----------|-----------|---------|-----------|-----------|---------|-----------|-----------|---------|-----------|-----------|---------|-----------|-----------|---------|-----------|-----------|---------|-----------|-----------|---------|-----------|-----------|---------|-----------|-----------|---------|-----------|-----------|---------|-----------|-----------|---------|-----------|-----------|---------|-----------|-----------|---------|-----------|-----------|---------|-----------|-----------|---------|-----------|-----------|---------|-----------|-----------|---------|-----------|-----------|---------|-----------|-----------|---------|-----------|-----------|---------|-----------|-----------|---------|-----------|-----------|---------|-----------|-----------|---------|-----------|-----------|---------|-----------|-----------|---------|-----------|-----------|---------|-----------|-----------|---------|-----------|-----------|---------|-----------|-----------|---------|-----------|-----------|---------|-----------|-----------|---------|-----------|-----------|---------|-----------|-----------|---------|-----------|-----------|---------|-----------|-----------|---------|-----------|-----------|---------|-----------|-----------|---------|-----------|-----------|---------|-----------|-----------|---------|-----------|-----------|---------|-----------|-----------|---------|-----------|-----------|---------|-----------|-----------|---------|-----------|-----------|---------|-----------|-----------|---------|-----------|-----------|---------|-----------|-----------|---------|-----------|-----------|---------|-----------|-----------|---------|-----------|-----------|---------|-----------|-----------|---------|-----------|-----------|---------|-----------|-----------|---------|-----------|-----------|---------|-----------|-----------|---------|-----------|-----------|---------|-----------|-----------|---------|-----------|-----------|---------|-----------|-----------|---------|-----------|-----------|---------|-----------|-----------|---------|-----------|-----------|---------|-----------|-----------|---------|-----------|-----------|---------|-----------|-----------|---------|-----------|-----------|---------|-----------|-----------|---------|-----------|-----------|---------|-----------|-----------|---------|-----------|-----------|---------|-----------|-----------|---------|-----------|-----------|---------|-----------|-----------|---------|-----------|-----------|---------|-----------|-----------|---------|-----------|-----------|---------|-----------|-----------|---------|-----------|-----------|---------|-----------|-----------|---------|-----------|-----------|---------|-----------|-----------|---------|-----------|-----------|---------|-----------|-----------|---------|-----------|-----------|---------|-----------|-----------|---------|-----------|-----------|---------|-----------|-----------|---------|-----------|-----------|---------|-----------|-----------|---------|-----------|-----------|---------|-----------|-----------|---------|-----------|-----------|---------|-----------|-----------|---------|-----------|-----------|---------|-----------|-----------|---------|-----------|-----------|---------|-----------|-----------|---------|-----------|-----------|---------|-----------|-----------|---------|-----------|-----------|---------|-----------|-----------|---------|-----------|-----------|---------|-----------|-----------|---------|-----------|-----------|---------|-----------|-----------|---------|-----------|-----------|---------|-----------|-----------|---------|-----------|-----------|---------|-----------|-----------|---------|-----------|-----------|---------|-----------|-----------|---------|-----------|-----------|---------|-----------|-----------|---------|-----------|-----------|---------|-----------|-----------|---------|-----------|-----------|---------|-----------|-----------|---------|-----------|-----------|---------|-----------|-----------|---------|-----------|-----------|---------|-----------|-----------|---------|-----------|-----------|---------|-----------|-----------|---------|-----------|-----------|---------|-----------|-----------|---------|-----------|-----------|---------|-----------|-----------|---------|-----------|-----------|---------|-----------|-----------|---------|-----------|-----------|---------|-----------|-----------|---------|-----------|-----------|---------|-----------|-----------|---------|-----------|-----------|---------|-----------|-----------|---------|-----------|-----------|---------|-----------|-----------|---------|-----------|-----------|---------|-----------|-----------|---------|-----------|-----------|---------|-----------|-----------|---------|-----------|-----------|---------|-----------|-----------|---------|-----------|-----------|---------|-----------|-----------|---------|-----------|-----------|---------|-----------|-----------|---------|-----------|-----------|---------|-----------|-----------|---------|-----------|-----------|---------|-----------|-----------|---------|-----------|-----------|---------|-----------|-----------|---------|-----------|-----------|---------|-----------|-----------|---------|-----------|-----------|---------|-----------|-----------|---------|-----------|-----------|---------|-----------|-----------|---------|-----------|-----------|---------|-----------|-----------|---------|-----------|-----------|---------|-----------|-----------|---------|-----------|-----------|---------|-----------|-----------|---------|-----------|-----------|---------|-----------|-----------|---------|-----------|-----------|---------|-----------|-----------|---------|-----------|-----------|---------|-----------|-----------|---------|-----------|-----------|---------|-----------|-----------|---------|-----------|-----------|---------|-----------|-----------|---------|-----------|-----------|---------|-----------|-----------|





Journal: Acta Neuropathologica

Brennan Harmon, Jordan Hall, Eric H. Raabe, Ping An, Melanie Weingart, Brian Rood, Suresh Magge, Roger J. Packer, Javad

**Corresponding Author:**

Javad Nazarian, Children's National Medical Center, Center for Genetic Medicine

Phone: 202-476-6022 Fax: 202-476-6014  
E-mail: [DMcGowan@CMBAC.com](mailto:DMcGowan@CMBAC.com)

|    |  |                   |  |                    |
|----|--|-------------------|--|--------------------|
| n: |  | FoldChange(10) n: |  | FoldChange(111) n: |
|----|--|-------------------|--|--------------------|



**Keywords:** Auto Neuroimmunology

Brennan Harmon, Jordan Hall, Eric H. Raabe, Ping An, Melanie Weingart, Brian Rood, Suresh Magge, Roger J. Packer, Javad Nazari

Javad Nazarian, Children's National Medical Center, Center for Genetic Medicine  
1111 Michigan Ave, NW, Washington, DC 20010

Email: JNazarian@CNMC.org

| p-value | FoldChange10 |  |  |  |  |  |  |  |  |  | FoldChange11 |  |  |  |  |  |  |  |  |  | FoldChange12 |  |  |  |  |  |  |  |  |  | FoldChange13 |  |  |  |  |  |  |  |  |  | FoldChange14 |  |  |  |  |  |  |  |  |  | FoldChange15 |  |  |  |  |  |  |  |  |  | FoldChange16 |  |  |  |  |  |  |  |  |  | FoldChange17 |  |  |  |  |  |  |  |  |  | FoldChange18 |  |  |  |  |  |  |  |  |  | FoldChange19 |  |  |  |  |  |  |  |  |  | FoldChange20 |  |  |  |  |  |  |  |  |  | FoldChange21 |  |  |  |  |  |  |  |  |  | FoldChange22 |  |  |  |  |  |  |  |  |  | FoldChange23 |  |  |  |  |  |  |  |  |  | FoldChange24 |  |  |  |  |  |  |  |  |  | FoldChange25 |  |  |  |  |  |  |  |  |  | FoldChange26 |  |  |  |  |  |  |  |  |  | FoldChange27 |  |  |  |  |  |  |  |  |  | FoldChange28 |  |  |  |  |  |  |  |  |  | FoldChange29 |  |  |  |  |  |  |  |  |  | FoldChange30 |  |  |  |  |  |  |  |  |  | FoldChange31 |  |  |  |  |  |  |  |  |  | FoldChange32 |  |  |  |  |  |  |  |  |  | FoldChange33 |  |  |  |  |  |  |  |  |  | FoldChange34 |  |  |  |  |  |  |  |  |  | FoldChange35 |  |  |  |  |  |  |  |  |  | FoldChange36 |  |  |  |  |  |  |  |  |  | FoldChange37 |  |  |  |  |  |  |  |  |  | FoldChange38 |  |  |  |  |  |  |  |  |  | FoldChange39 |  |  |  |  |  |  |  |  |  | FoldChange40 |  |  |  |  |  |  |  |  |  | FoldChange41 |  |  |  |  |  |  |  |  |  | FoldChange42 |  |  |  |  |  |  |  |  |  | FoldChange43 |  |  |  |  |  |  |  |  |  | FoldChange44 |  |  |  |  |  |  |  |  |  | FoldChange45 |  |  |  |  |  |  |  |  |  | FoldChange46 |  |  |  |  |  |  |  |  |  | FoldChange47 |  |  |  |  |  |  |  |  |  | FoldChange48 |  |  |  |  |  |  |  |  |  | FoldChange49 |  |  |  |  |  |  |  |  |  | FoldChange50 |  |  |  |  |  |  |  |  |  | FoldChange51 |  |  |  |  |  |  |  |  |  | FoldChange52 |  |  |  |  |  |  |  |  |  | FoldChange53 |  |  |  |  |  |  |  |  |  | FoldChange54 |  |
|---------|--------------|--|--|--|--|--|--|--|--|--|--------------|--|--|--|--|--|--|--|--|--|--------------|--|--|--|--|--|--|--|--|--|--------------|--|--|--|--|--|--|--|--|--|--------------|--|--|--|--|--|--|--|--|--|--------------|--|--|--|--|--|--|--|--|--|--------------|--|--|--|--|--|--|--|--|--|--------------|--|--|--|--|--|--|--|--|--|--------------|--|--|--|--|--|--|--|--|--|--------------|--|--|--|--|--|--|--|--|--|--------------|--|--|--|--|--|--|--|--|--|--------------|--|--|--|--|--|--|--|--|--|--------------|--|--|--|--|--|--|--|--|--|--------------|--|--|--|--|--|--|--|--|--|--------------|--|--|--|--|--|--|--|--|--|--------------|--|--|--|--|--|--|--|--|--|--------------|--|--|--|--|--|--|--|--|--|--------------|--|--|--|--|--|--|--|--|--|--------------|--|--|--|--|--|--|--|--|--|--------------|--|--|--|--|--|--|--|--|--|--------------|--|--|--|--|--|--|--|--|--|--------------|--|--|--|--|--|--|--|--|--|--------------|--|--|--|--|--|--|--|--|--|--------------|--|--|--|--|--|--|--|--|--|--------------|--|--|--|--|--|--|--|--|--|--------------|--|--|--|--|--|--|--|--|--|--------------|--|--|--|--|--|--|--|--|--|--------------|--|--|--|--|--|--|--|--|--|--------------|--|--|--|--|--|--|--|--|--|--------------|--|--|--|--|--|--|--|--|--|--------------|--|--|--|--|--|--|--|--|--|--------------|--|--|--|--|--|--|--|--|--|--------------|--|--|--|--|--|--|--|--|--|--------------|--|--|--|--|--|--|--|--|--|--------------|--|--|--|--|--|--|--|--|--|--------------|--|--|--|--|--|--|--|--|--|--------------|--|--|--|--|--|--|--|--|--|--------------|--|--|--|--|--|--|--|--|--|--------------|--|--|--|--|--|--|--|--|--|--------------|--|--|--|--|--|--|--|--|--|--------------|--|--|--|--|--|--|--|--|--|--------------|--|--|--|--|--|--|--|--|--|--------------|--|--|--|--|--|--|--|--|--|--------------|--|--|--|--|--|--|--|--|--|--------------|--|
|---------|--------------|--|--|--|--|--|--|--|--|--|--------------|--|--|--|--|--|--|--|--|--|--------------|--|--|--|--|--|--|--|--|--|--------------|--|--|--|--|--|--|--|--|--|--------------|--|--|--|--|--|--|--|--|--|--------------|--|--|--|--|--|--|--|--|--|--------------|--|--|--|--|--|--|--|--|--|--------------|--|--|--|--|--|--|--|--|--|--------------|--|--|--|--|--|--|--|--|--|--------------|--|--|--|--|--|--|--|--|--|--------------|--|--|--|--|--|--|--|--|--|--------------|--|--|--|--|--|--|--|--|--|--------------|--|--|--|--|--|--|--|--|--|--------------|--|--|--|--|--|--|--|--|--|--------------|--|--|--|--|--|--|--|--|--|--------------|--|--|--|--|--|--|--|--|--|--------------|--|--|--|--|--|--|--|--|--|--------------|--|--|--|--|--|--|--|--|--|--------------|--|--|--|--|--|--|--|--|--|--------------|--|--|--|--|--|--|--|--|--|--------------|--|--|--|--|--|--|--|--|--|--------------|--|--|--|--|--|--|--|--|--|--------------|--|--|--|--|--|--|--|--|--|--------------|--|--|--|--|--|--|--|--|--|--------------|--|--|--|--|--|--|--|--|--|--------------|--|--|--|--|--|--|--|--|--|--------------|--|--|--|--|--|--|--|--|--|--------------|--|--|--|--|--|--|--|--|--|--------------|--|--|--|--|--|--|--|--|--|--------------|--|--|--|--|--|--|--|--|--|--------------|--|--|--|--|--|--|--|--|--|--------------|--|--|--|--|--|--|--|--|--|--------------|--|--|--|--|--|--|--|--|--|--------------|--|--|--|--|--|--|--|--|--|--------------|--|--|--|--|--|--|--|--|--|--------------|--|--|--|--|--|--|--|--|--|--------------|--|--|--|--|--|--|--|--|--|--------------|--|--|--|--|--|--|--|--|--|--------------|--|--|--|--|--|--|--|--|--|--------------|--|--|--|--|--|--|--|--|--|--------------|--|--|--|--|--|--|--|--|--|--------------|--|--|--|--|--|--|--|--|--|--------------|--|--|--|--|--|--|--|--|--|--------------|--|--|--|--|--|--|--|--|--|--------------|--|

Javad Nazarian, Children's National Medical Center, Center for Genetic Medicine

LEUNG, J. & ZHANG, H. 2003. *Journal of Fish Biology*, **63**, 1033–1041.









**Corresponding Author:**  
Javad Nazarian, Children's National Medical Center, Center for Genetic Medicine  
111 Michigan Ave., NW, Washington DC, 20010  
Phone: 202-476-6022 Fax: 202-476-6014  
Email: JNazarian@CNMC.org

**Corresponding Author:**  
Javad Nazarian, Children's National Medical Center, Center for Genetic Medicine  
111 Michigan Ave., NW, Washington DC, 20010  
Phone: 202-476-6022 Fax: 202-476-6014  
Email: JNazarian@CNMC.org

**Corresponding Author:**  
Javad Nazarian, Children's National Medical Center, Center for Genetic Medicine  
111 Michigan Ave., NW, Washington DC, 20010  
Phone: 202-476-6022 Fax: 202-476-6014  
Email: JNazarian@CNMC.org

[illegible]
