# Supplementary material
Source: PubMed Central journal article supplement (PMC4028366)
Supplement: NIHMS545812-supplement-401_2013_1218_MOESM13_ESM.pdf [file NIHMS545812-supplement-401_2013_1218_MOESM13_ESM.pdf]

File: ESM\_11 (Online Resource 11)

**Manuscript Title:** Comparative Multidimensional Molecular Analyses of Pediatric Diffuse Intrinsic Pontine Glioma Reveals Distinct Molecular Subtypes

**Journal:** Acta Neuropathologica

**Authors:** Amanda M. Saratsis, Madhuri Kambhampati, Kendall Snyder, Sridevi Yadavilli, Joe Devaney, Brennan Harmon, Jordan Hall, Eric H. Raabe, Ping An, Melanie Weingart, Brian Rood, Suresh Magge, Roger J. Packer, Javad Nazarian

**Corresponding Author:**

Javad Nazarian

Children's National Medical Center, Center for Genetic Medicine

111 Michigan Ave., NW, Washington DC, 20010

Phone: 202-476-6022 Fax: 202-476-6014

Email: JNazarian@CNMC.org

| Gene ID   | p-value (1 vs. 2) | MeanRatio (1 vs. 2) | FoldChange (1 vs. 2) | FoldChange (1 vs. 2) | F(Gene Group) | SS(Gene Group) | SS(Error) | F(Error) | FoldChange (106 vs. n) | FoldChange (111 vs. n) | FoldChange (112 vs. n) | FoldChange (121 vs. n) | FoldChange (347 vs. n) | FoldChange (353 vs. n) | FoldChange (537 vs. n) | FoldChange (563 vs. n) |
|-----------|-------------------|---------------------|----------------------|----------------------|---------------|----------------|-----------|----------|------------------------|------------------------|------------------------|------------------------|------------------------|------------------------|------------------------|------------------------|
| ABI3BP    | 0.448707          | 0.152963            | -6.53755             | 1 down vs 2          | 0.65658       | 1976.53        | 18062     | 1        | 4.52612                | 2.42827                | 2.20652                | 15.4986                | -2.43516               | 18.8329                | 10.8266                | 157.36                 |
| ABL2      | 0.133292          | -0.429557           | -2.32798             | 1 down vs 2          | 3.01281       | 162.224        | 323.069   | 1        | -6.38655               | 2.33607                | 3.02846                | -5.45098               | 3.45263                | -1.19555               | 8.82283                | 19.5413                |
| ACMSD     | 0.599448          | 0.339921            | -2.94186             | 1 down vs 2          | 0.307181      | 1841.18        | 35962.7   | 1        | 37.896                 | 7.09331                | 6.97566                | 6.99726                | 3.51839                | -1.21671               | 215.241                | 9.27417                |
| ACP6      | 0.39876           | -0.180074           | -5.55328             | 1 down vs 2          | 0.824905      | 1106.97        | 8051.61   | 1        | -3.32891               | -2.44172               | -2.93318               | -4.01944               | -3.77484               | 3.16558                | 4.5317                 | 100.628                |
| ACRV1     | 0.120964          | -0.243128           | -4.11305             | 1 down vs 2          | 3.2612        | 9345.22        | 17193.5   | 1        | -46.018                | 104.097                | 2.344                  | 6.79127                | -2.19566               | 26.3449                | 141.77                 | 9.39814                |
| ACTG2     | 0.279947          | 0.0532453           | -18.781              | 1 down vs 2          | 1.40989       | 1574.96        | 6702.49   | 1        | -2.60028               | 4.11495                | 49.292                 | 4.58554                | 2.90464                | 1.3907                 | 3.94737                | 94.3169                |
| ACTR3     | 0.0148981         | -0.82766            | -1.20823             | 1 down vs 2          | 11.4096       | 96.8115        | 50.9107   | 1        | -4.29658               | 7.56198                | 2.04946                | -2.10137               | -3.36409               | -1.01809               | 4.49857                | 6.566                  |
| ADAMDEC1  | 0.457657          | 0.274061            | -3.64882             | 1 down vs 2          | 0.629797      | 157.534        | 1500.81   | 1        | 21.0057                | 35.7175                | 16.909                 | 3.35307                | -13.9774               | 2.4839                 | 10.5698                | -2.54725               |
| ADARB1    | 0.105452          | 0.0569463           | -1.75604             | 1 down vs 2          | 3.62862       | 1024.18        | 1693.5    | 1        | -14.5308               | 6.18353                | 4.16403                | -2.48851               | -8.42103               | 21.6392                | 46.7701                | -4.29974               |
| AFAP1     | 0.0853536         | -0.705863           | -1.41671             | 1 down vs 2          | 4.23323       | 115.226        | 163.316   | 1        | -3.33426               | 5.28989                | 5.68457                | -3.4609                | -2.93615               | 2.09209                | 13.758                 | -3.84721               |
| AGMAT     | 0.164953          | -0.940767           | -1.06296             | 1 down vs 2          | 2.49969       | 305.402        | 733.058   | 1        | -12.8044               | -3.08524               | 24.8522                | -3.5425                | -2.21257               | -2.10972               | 15.6578                | -2.43502               |
| AGTR2     | 0.743449          | 0.475489            | -2.1031              | 1 down vs 2          | 0.117503      | 63.1213        | 3223.15   | 1        | -5.04993               | 4.88525                | -3.11591               | 23.2058                | -2.37635               | -1.56361               | 57.5026                | -2.39848               |
| AJAP1     | 0.364209          | 0.0487428           | -2.01559             | 1 down vs 2          | 0.963522      | 102.214        | 636.503   | 1        | -2.65554               | 2.58043                | 18.3623                | 6.55365                | -2.76313               | -2.6597                | 22.8913                | -2.36583               |
| AKAP12    | 0.014314          | -0.685031           | -1.45979             | 1 down vs 2          | 11.6299       | 223.008        | 115.052   | 1        | -7.12523               | 6.21399                | 7.926                  | -2.20162               | -3.97412               | 1.71494                | 14.2305                | 2.27556                |
| AKAP12    | 0.00480416        | -0.772786           | -1.29402             | 1 down vs 2          | 18.9532       | 197.976        | 62.6733   | 1        | -3.07085               | 5.55697                | 7.61086                | -3.44791               | -6.9191                | 1.7904                 | 10.969                 | 3.05418                |
| AKAP7     | 0.21571           | -0.269755           | -3.70707             | 1 down vs 2          | 1.91479       | 3004.53        | 9414.7    | 1        | -17.2052               | 114.86                 | 5.15882                | -3.58961               | -4.71797               | 22.3558                | 22.3644                | -7.10944               |
| ALDH1A2   | 0.0992188         | -0.252871           | -3.95459             | 1 down vs 2          | 3.79797       | 104.382        | 164.901   | 1        | -10.8991               | 9.94895                | 6.73598                | 3.1734                 | 3.20792                | 4.19897                | 6.49034                | 2.40235                |
| ALPK2     | 0.0668487         | -0.552488           | -1.80999             | 1 down vs 2          | 4.9931        | 2207.26        | 2652.38   | 1        | -13.5918               | 20.0843                | 41.2985                | -17.3706               | -5.66804               | -7.39232               | 53.3833                | 3.12765                |
| ALS2CR12  | 0.577234          | 0.0114782           | -87.1216             | 1 down vs 2          | 0.347135      | 1754.64        | 30327.7   | 1        | -6.31192               | 15.3238                | -186.353               | 2.73581                | 2.51049                | 2.68694                | 7.40051                | 6.21091                |
| AMICA1    | 0.239443          | -0.0049132          | -203.535             | 1 down vs 2          | 1.70516       | 276.888        | 974.296   | 1        | 4.24271                | 36.3353                | 4.13211                | -8.55845               | 4.1375                 | 1.58942                | 2.57576                | 15.8309                |
| AMY1A     | 0.0352429         | -0.427959           | -2.33667             | 1 down vs 2          | 7.32825       | 708.958        | 580.459   | 1        | -11.2216               | 18.7848                | 4.66076                | -3.10031               | -3.16116               | 2.62098                | 11.0186                | 31.0018                |
| ANKRD36   | 0.165935          | -0.452398           | -2.21044             | 1 down vs 2          | 2.48602       | 280.181        | 676.216   | 1        | -5.14583               | 19.4963                | 4.09532                | -3.72661               | -2.55043               | -1.72543               | 24.6482                | -4.43173               |
| ANKRD6    | 0.0433864         | -0.706622           | -1.41518             | 1 down vs 2          | 6.51158       | 207.712        | 191.393   | 1        | -11.0211               | 3.56309                | 4.11931                | 3.5692                 | -5.62189               | 6.28989                | 13.9687                | 2.89537                |
| ANKZF1    | 0.367148          | -0.200528           | -4.98683             | 1 down vs 2          | 0.950909      | 713.397        | 4501.36   | 1        | -2.41285               | 75.4701                | -2.11359               | 3.11296                | -10.4745               | 1.07999                | 2.09417                | 4.70796                |
| ANO6      | 0.0101624         | -0.477286           | -2.09518             | 1 down vs 2          | 13.6444       | 132.676        | 58.3428   | 1        | -3.01799               | 4.41724                | 2.07354                | -2.46155               | -2.6737                | 2.61575                | 8.6427                 | 10.7216                |
| ANXA1     | 0.0721092         | -0.102974           | -9.71119             | 1 down vs 2          | 4.7503        | 678.049        | 856.429   | 1        | 2.2515                 | 22.9596                | 6.78784                | -4.74969               | -2.82796               | 1.50538                | 38.227                 | 16.7256                |
| AP1GBP1   | 0.0165247         | -0.860615           | -1.16196             | 1 down vs 2          | 10.8525       | 242            | 133.794   | 1        | -6.03467               | 12.573                 | 10.0181                | -4.46414               | -5.26572               | -1.93285               | 6.94463                | 2.92669                |
| APBA2BP   | 0.392529          | -0.104451           | -9.57388             | 1 down vs 2          | 0.84842       | 3878.05        | 27425.4   | 1        | -4.25737               | 3.34903                | 189.266                | -3.58115               | -5.06454               | 3.13595                | 7.09302                | 3.04331                |
| APOBEC3D  | 0.50879           | -0.124835           | -8.01059             | 1 down vs 2          | 0.493267      | 10617.9        | 129154    | 1        | -43.9542               | 9.71337                | 2.75832                | 21.8733                | -2.97364               | -7.46596               | -53.0591               | 382.556                |
| APOBEC3F  | 0.265691          | -0.710615           | -1.40723             | 1 down vs 2          | 1.50616       | 3556.38        | 14167.4   | 1        | -44.2976               | -2.89101               | -3.68064               | -7.91575               | -2.06252               | -2.53803               | 8.91961                | 127.488                |
| APOC1     | 0.0788442         | -0.0700611          | -14.2733             | 1 down vs 2          | 4.47253       | 55.5988        | 74.5871   | 1        | 4.30589                | 9.55513                | 2.24499                | -2.26667               | -3.10882               | 1.81437                | 6.78181                | 5.04817                |
| ARHGAP10  | 0.0725577         | -0.0100654          | -99.3498             | 1 down vs 2          | 4.73072       | 69.0574        | 87.5859   | 1        | -2.02654               | 2.7701                 | 4.1049                 | 5.5124                 | -3.66729               | 9.29001                | 9.49237                | 4.38435                |
| ARHGAP11A | 0.258835          | -0.0232216          | -43.0634             | 1 down vs 2          | 1.55524       | 11337.5        | 43739.1   | 1        | -11.0432               | 144.711                | -2.87316               | 3.66064                | 2.08836                | 3.24288                | 226.849                | 8.0477                 |
| ARHGEF5L  | 0.484396          | 0.060101            | -16.6387             | 1 down vs 2          | 0.555089      | 3730.22        | 40320.2   | 1        | 4.04738                | 7.408                  | 5.99675                | 6.56453                | -2.05557               | 1.81292                | 226.77                 | -4.71086               |
| ASAH2B    | 0.945679          | 0.947271            | -1.05566             | 1 down vs 2          | 0.00504588    | 0.0831512      | 98.8742   | 1        | -2.49512               | 2.07736                | -2.67054               | -5.97408               | -2.8804                | -2.53023               | -6.01273               | -10.8328               |
| ATP1B4    | 0.264081          | -0.719803           | -1.38927             | 1 down vs 2          | 1.51751       | 538.432        | 2128.87   | 1        | -2.34342               | -2.85193               | 50.3928                | -7.94781               | -10.9863               | -3.6265                | 3.32016                | 2.03246                |
| ATP2B4    | 0.328077          | -0.679534           | -1.4716              | 1 down vs 2          | 1.13304       | 18.75          | 99.2901   | 1        | -4.22179               | 3.66366                | 3.68342                | 4.5345                 | -4.15105               | 1.39221                | 4.64753                | -3.97267               |
| ATRN      | 0.0924631         | -0.266973           | -3.74569             | 1 down vs 2          | 3.99885       | 509.595        | 764.612   | 1        | -5.29923               | 33.8636                | 3.45334                | -2.09926               | -3.0231                | 2.30814                | 20.4079                | 5.0271                 |

| Gene ID   | p-value (1 vs. 2) | MeanRatio (1 vs. 2) | FoldChange (1 vs. 2) | FoldChange (1 vs. 2) | F(Gene Group) | SS(Gene Group) | SS(Error) | F(Error) | FoldChange (106 vs. n) | FoldChange (111 vs. n) | FoldChange (112 vs. n) | FoldChange (121 vs. n) | FoldChange (347 vs. n) | FoldChange (353 vs. n) | FoldChange (537 vs. n) | FoldChange (563 vs. n) |
|-----------|-------------------|---------------------|----------------------|----------------------|---------------|----------------|-----------|----------|------------------------|------------------------|------------------------|------------------------|------------------------|------------------------|------------------------|------------------------|
| AURKA     | 0.251907          | -0.394519           | -2.53473             | 1 down vs 2          | 1.60684       | 2983.54        | 11140.6   | 1        | -35.0264               | 118.964                | 3.93279                | 3.27311                | -2.10225               | 4.51827                | 13.3629                | 2.24674                |
| AURKA     | 0.319204          | -0.254597           | -3.92778             | 1 down vs 2          | 1.17922       | 8458.95        | 43039.9   | 1        | -35.294                | 237.221                | 5.01871                | 2.77528                | -8.37223               | 5.65231                | 16.1395                | 3.65308                |
| B3GAT2    | 0.738897          | -0.223256           | -4.47915             | 1 down vs 2          | 0.121913      | 1442.33        | 70985.2   | 1        | -33.7791               | 237.132                | -126.595               | 7.49263                | 11.1006                | -1.46945               | 6.7751                 | -2.47622               |
| B3GNT2    | 0.748183          | 0.470255            | -2.12651             | 1 down vs 2          | 0.113015      | 199.642        | 10599.1   | 1        | -17.8756               | 4.65554                | 2.04424                | -3.10429               | -6.49986               | -1.21517               | 7.96326                | -110.841               |
| B4GALT5   | 0.00338847        | -0.652934           | -1.53155             | 1 down vs 2          | 21.9222       | 214.701        | 58.7627   | 1        | -5.1928                | 9.83827                | 2.73193                | -3.32717               | -4.16098               | 4.76965                | 11.1632                | 3.86611                |
| BCL7A     | 0.393039          | -0.261166           | -3.82898             | 1 down vs 2          | 0.846472      | 3556.61        | 25210.1   | 1        | -23.9035               | 3.68328                | 2.87265                | 4.48467                | -7.6384                | 1.54396                | 175.025                | -10.4555               |
| BEAN      | 0.389448          | -0.104742           | -9.54726             | 1 down vs 2          | 0.860277      | 630576         | 4.40E+06  | 1        | -9.59052               | 6.30153                | 2.08883                | -4.55359               | -150.805               | 231.564                | 2389.2                 | -4.46887               |
| BIRC5     | 0.341354          | 0.109098            | -9.16605             | 1 down vs 2          | 1.06746       | 270.838        | 1522.32   | 1        | -6.18645               | 44.3691                | 3.05833                | 15.9481                | -5.34632               | 5.45399                | 8.64733                | 5.92315                |
| BRD7P2    | 0.39394           | -0.0180965          | -55.2593             | 1 down vs 2          | 0.84304       | 9221.5         | 65630.3   | 1        | 8.23081                | -2.45754               | -291.247               | -2.03997               | -2.45122               | -1.66325               | -64.8031               | 15.7565                |
| BRIP1     | 0.331823          | -0.268795           | -3.7203              | 1 down vs 2          | 1.11412       | 3627.44        | 19535.2   | 1        | -18.0505               | 3.19996                | 158.806                | -6.6819                | -3.22204               | 1.97331                | 13.231                 | -3.87869               |
| BRUNOL5   | 0.972904          | 0.958237            | -1.04358             | 1 down vs 2          | 0.00125359    | 4.66677        | 22336.3   | 1        | -89.575                | 15.5827                | -143.131               | -13.859                | -5.16066               | 1.86794                | 3.25807                | -66.457                |
| BSND      | 0.323265          | 0.0662104           | -15.1034             | 1 down vs 2          | 1.15785       | 6069.54        | 13452.5   | 1        | -5.65372               | 192.936                | 110.958                | -2.83696               | 20.5932                | 4.08617                | 2.86775                | -6.19992               |
| C10orf111 | 0.313291          | -0.552691           | -1.80933             | 1 down vs 2          | 1.21112       | 3853.19        | 19089     | 1        | -55.9724               | 5.61181                | 3.09249                | 5.10029                | 2.46289                | -1.95816               | 144.548                | -5.3138                |
| C10orf59  | 0.316639          | -0.266225           | -3.75622             | 1 down vs 2          | 1.19295       | 433.686        | 2181.24   | 1        | -3.13854               | 2.2823                 | -2.3251                | -2.77908               | -3.67521               | -5.15392               | 13.441                 | 51.8103                |
| C12orf48  | 0.505465          | 0.432075            | -2.31441             | 1 down vs 2          | 0.501362      | 5.49424        | 65.7517   | 1        | -2.10733               | 4.22146                | 7.14729                | 3.55944                | 2.45489                | -2.30306               | 2.33557                | 3.66941                |
| C12orf49  | 0.0297127         | -0.871958           | -1.14684             | 1 down vs 2          | 8.04434       | 129.668        | 96.7152   | 1        | -2.97485               | 7.21528                | 2.65185                | -3.79727               | -4.84871               | -1.58702               | 11.1472                | 2.78482                |
| C14orf37  | 0.153758          | -0.858837           | -1.16437             | 1 down vs 2          | 2.66407       | 270.076        | 608.265   | 1        | -9.83062               | 2.73153                | 2.11395                | -3.13525               | -3.66953               | 2.33179                | 27.6607                | -2.55515               |
| C16orf74  | 0.475075          | -0.318167           | -3.143               | 1 down vs 2          | 0.580266      | 3805.58        | 39350     | 1        | 57.9539                | -201.493               | -5.07177               | -22.1717               | -3.15979               | 1.20318                | 32.4721                | 2.00231                |
| C17orf51  | 0.185805          | -0.502264           | -1.99099             | 1 down vs 2          | 2.23189       | 3494.28        | 9393.67   | 1        | -36.3823               | 3.86236                | 42.3791                | -3.42197               | -3.49545               | 1.65696                | 104.456                | -8.67258               |
| C17orf67  | 0.245574          | -0.0376058          | -2.5917              | 1 down vs 2          | 1.65588       | 43.1508        | 156.355   | 1        | -2.92031               | 6.24375                | -2.33487               | 5.45703                | -3.05832               | 1.84427                | 11.6038                | 5.76006                |
| C17orf98  | 0.142207          | -0.231611           | -4.31759             | 1 down vs 2          | 2.8523        | 360.158        | 757.617   | 1        | -8.47969               | 3.88228                | 13.7347                | -2.00887               | 2.66954                | 1.30839                | 33.2564                | 4.08377                |
| C1orf187  | 0.0490744         | -0.0839346          | -11.914              | 1 down vs 2          | 6.05493       | 1390.71        | 1378.09   | 1        | -5.25376               | 38.1826                | 7.74185                | 2.17226                | -3.24518               | 17.1239                | 50.4713                | 12.1076                |
| C1QB      | 0.117483          | -0.506797           | -1.97318             | 1 down vs 2          | 3.33776       | 38.417         | 69.0589   | 1        | 2.24073                | 7.41422                | 3.20958                | -3.78784               | -3.02021               | -2.10412               | 2.29748                | 4.20305                |
| C1QL4     | 0.602289          | 0.317903            | -3.14561             | 1 down vs 2          | 0.302307      | 17098.2        | 339355    | 1        | 2.48711                | 23.6251                | 3.06517                | 125.864                | 2.05422                | 653.085                | 18.2008                |                        |
| C1QTNF5   | 0.104526          | 0.282416            | -3.54088             | 1 down vs 2          | 3.6529        | 45.6322        | 74.9523   | 1        | 4.57098                | 5.0821                 | 2.63897                | 3.56456                | -2.31085               | 5.97282                | 9.52329                | 11.157                 |
| C1S       | 0.027479          | -0.153894           | -6.49799             | 1 down vs 2          | 8.38657       | 154.784        | 110.737   | 1        | 4.21284                | 8.01045                | 6.95994                | -4.77514               | -3.07299               | 3.21994                | 6.85611                | 14.3237                |
| C2        | 0.262279          | -0.0646644          | -15.4645             | 1 down vs 2          | 1.53035       | 121.618        | 476.826   | 1        | 4.81548                | 2.49346                | 9.47463                | -3.80272               | -2.48024               | -1.71985               | 2.81625                | 24.7585                |
| C20orf7   | 0.544529          | 0.336798            | -2.96913             | 1 down vs 2          | 0.412326      | 4.67485        | 68.0265   | 1        | -2.18528               | 2.09556                | 3.16145                | 2.11076                | 2.48015                | 1.50175                | 7.7224                 | -2.57676               |
| C21orf131 | 0.491897          | 0.202395            | -4.94083             | 1 down vs 2          | 0.535469      | 44490.7        | 498524    | 1        | -2.16052               | -140.962               | -13.2592               | -7.17036               | -107.934               | -811.066               | -3.37982               | 3.02486                |
| C21orf62  | 0.0360314         | -0.175124           | -5.71023             | 1 down vs 2          | 7.23849       | 2393.62        | 1984.08   | 1        | 11.4163                | 10.6103                | 62.0502                | -19.7604               | -7.62981               | 28.9438                | 29.7245                | 20.6957                |
| C22orf9   | 0.468585          | 0.559844            | -1.78621             | 1 down vs 2          | 0.598333      | 97.4093        | 976.807   | 1        | -13.1169               | -6.85964               | -28.4201               | -4.6997                | -9.68652               | -36.9999               | -7.24311               | -2.35452               |
| C2orf27A  | 0.210346          | -0.0203609          | -49.1137             | 1 down vs 2          | 1.96686       | 33772.6        | 103025    | 1        | -7.24883               | 292.496                | 5.74467                | 2.91225                | -3.69769               | 15.9855                | 22.282                 | 321.146                |
| C3orf15   | 0.182249          | -0.27875            | -3.58744             | 1 down vs 2          | 2.27446       | 309.348        | 816.056   | 1        | -7.13548               | 3.4764                 | 3.46137                | 3.82651                | -5.09092               | 5.87676                | 34.4249                | 2.98411                |
| C3orf55   | 0.997293          | 0.990251            | -1.00985             | 1 down vs 2          | 1.25E-05      | 0.0003275      | 157.062   | 1        | -2.36947               | 2.45881                | 2.6388                 | -4.40117               | 2.74347                | -8.75563               | 3.16269                | -6.2827                |
| C4orf11   | 0.395303          | -0.0893875          | -11.1872             | 1 down vs 2          | 0.837876      | 6572.59        | 47066.1   | 1        | -8.46757               | 5.65858                | 9.88214                | 2.93228                | -9.03886               | 5.03115                | 248.152                | 3.01715                |
| C4orf15   | 0.294707          | -0.638555           | -1.56604             | 1 down vs 2          | 1.31769       | 76.6728        | 349.123   | 1        | -4.94293               | 4.58553                | 9.38432                | 3.5798                 | -6.11303               | 3.95527                | 11.8234                | -10.2353               |
| C6orf105  | 0.271923          | 0.148867            | -6.7174              | 1 down vs 2          | 1.46315       | 160.454        | 657.981   | 1        | -2.2819                | -12.3532               | -3.79899               | -4.64818               | 2.07611                | -1.60428               | -32.1939               | -4.39306               |
| C6orf127  | 0.182594          | -0.958379           | -1.04343             | 1 down vs 2          | 2.27029       | 50.7059        | 134.007   | 1        | -2.48466               | -2.1611                | 6.94323                | -9.31826               | 4.16825                | 3.6881                 | 2.77849                | 2.02834                |
| C6orf15   | 0.496403          | 0.187719            | -5.32711             | 1 down vs 2          | 0.523948      | 19.3109        | 221.139   | 1        | 4.2246                 | 4.94365                | -8.98012               | -3.9574                | -2.49217               | 1.66127                | -7.62737               | -9.75186               |
| C6orf150  | 0.421135          | -0.477128           | -2.09587             | 1 down vs 2          | 0.74529       | 249.351        | 2007.41   | 1        | -2.15724               | 40.5174                | 2.00498                | -2.99858               | -6.01906               | -20.643                | 15.0948                | 2.06103                |
| C6orf173  | 0.162551          | -0.228684           | -4.37285             | 1 down vs 2          | 2.5336        | 3107.92        | 7360.09   | 1        | -28.5981               | 97.2919                | 50.3987                | 8.1236                 | -2.25821               | 8.67317                | 6.7647                 | 2.54927                |
| C6orf174  | 0.738886          | 0.396511            | -2.522               | 1 down vs 2          | 0.121923      | 138.88         | 6834.51   | 1        | -9.27542               | 11.2304                | 3.07155                | -4.85682               | -2.83168               | -86.9765               | 8.69323                | -7.32369               |
| C6orf208  | 0.274249          | 0.18313             | -5.46061             | 1 down vs 2          | 1.44746       | 67.6331        | 280.352   | 1        | 9.96568                | 2.59169                | 9.51141                | -2.39146               | -3.53492               | 4.15796                | 17.798                 | 2.70267                |
| C6orf211  | 0.016826          | -0.553523           | -1.80661             | 1 down vs 2          | 10.7573       | 200.2          | 111.664   | 1        | -2.84869               | 2.48189                | 8.28699                | -10.4706               | 2.27415                | 9.49444                | 7.27719                |                        |
| C6orf94   | 0.511939          | -0.0268882          | -37.1911             | 1 down vs 2          | 0.485691      | 42598.8        | 526245    | 1        | -4.57005               | 5.7121                 | 8.15956                | -4.56256               | -2.70754               | 792.579                | 2.82798                | -75.3655               |
| C7orf13   | 0.161224          | -0.311168           | -3.21369             | 1 down vs 2          | 2.55265       | 45.0436        | 105.875   | 1        | -4.68299               | 8.72596                | -2.08452               | 3.58275                | -2.38935               | 2.86173                | 6.64863                | 2.53899                |
| C7orf52   | 0.286734          | -0.0058861          | -169.892             | 1 down vs 2          | 1.3666        | 19422.5        | 85273.6   | 1        | -2.35692               | 8.27273                | 38.9916                | 3.06056                | -2.49034               | 85.9853                | 356.657                | 16.0038                |
| C7orf68   | 0.343588          | -0.12462            | -8.02442             | 1 down vs 2          | 1.05682       | 696.318        | 3953.27   | 1        | -2.13613               | 4.99813                | 2.47688                | 2.11199                | -6.38213               | 1.70136                | 3.429                  | 73.0723                |
| C8orf42   | 0.290768          | 0.0467922           | -21.3711             | 1 down vs 2          | 1.3416        | 219.876        | 983.344   | 1        | -3.5254                | 33.3506                | -8.01564               | 2.22367                | 2.89649                | 12.8638                | 15.9615                | 2.64265                |
| C8orf80   | 0.716541          | 0.478584            | -2.0895              | 1 down vs 2          | 0.144931      | 49.3168        | 2041.66   | 1        | -7.96352               | 5.70162                | -2.76102               | -2.83282               | -3.32553               | -5.85875               | 2.99271                | -49.2539               |
| C9orf109  | 0.831167          | 0.693654            | -1.44164             | 1 down vs 2          | 0.0495893     | 1.40033        | 169.432   | 1        | -2.67522               | 4.07083                | 3.02133                | 11.1041                | -2.55848               | -2.54649               | 6.48709                | 3.07225                |
| C9orf117  | 0.342239          | -0.0088176          | -113.409             | 1 down vs 2          | 1.06323       | 1014.61        | 5725.59   | 1        | -6.06129               | 89.9005                | 4.82256                | 7.71338                | -2.26206               | 10.9143                | 2.40028                | 7.25608                |

| Gene ID  | p-value (1 vs. 2) | MeanRatio (1 vs. 2) | FoldChange (1 vs. 2) | FoldChange (1 vs. 2) | F(Gene Group) | SS(Gene Group) | SS(Error) | F(Error) | FoldChange (106 vs. n) | FoldChange (111 vs. n) | FoldChange (112 vs. n) | FoldChange (121 vs. n) | FoldChange (347 vs. n) | FoldChange (353 vs. n) | FoldChange (537 vs. n) | FoldChange (563 vs. n) |
|----------|-------------------|---------------------|----------------------|----------------------|---------------|----------------|-----------|----------|------------------------|------------------------|------------------------|------------------------|------------------------|------------------------|------------------------|------------------------|
| C9orf50  | 0.00344788        | -0.445566           | -2.24434             | 1 down vs 2          | 21.766        | 302.178        | 83.2981   | 1        | -2.06802               | 12.4459                | 12.9644                | -2.84648               | -6.82436               | 5.50946                | 9.51128                | 3.47892                |
| C9orf61  | 0.213674          | -0.243844           | -4.10098             | 1 down vs 2          | 1.93434       | 64.3936        | 199.739   | 1        | 2.81533                | -5.82657               | -2.27135               | 5.88055                | -5.2493                | -13.4773               | 2.31921                | -4.30125               |
| CACNG6   | 0.126132          | -0.550574           | -1.81629             | 1 down vs 2          | 3.15298       | 801.741        | 1525.68   | 1        | 2.95417                | 37.4702                | 15.9393                | 2.81696                | -27.7984               | 7.98695                | 7.71186                | -2.42858               |
| CACYBP   | 0.344017          | -0.26331            | -3.7978              | 1 down vs 2          | 1.05479       | 4095.34        | 23295.6   | 1        | -21.3456               | 172.304                | 2.15497                | -3.06466               | -4.81264               | -1.56468               | 15.156                 | -3.07913               |
| CALD1    | 0.023499          | -0.895134           | -1.11715             | 1 down vs 2          | 9.10004       | 110.153        | 72.6279   | 1        | -2.69829               | 5.80603                | 2.01408                | -4.03077               | -4.13185               | -1.23333               | 10.0492                | 3.58616                |
| CANX     | 0.000130414       | -0.994559           | -1.00547             | 1 down vs 2          | 75.06         | 91.6851        | 7.32894   | 1        | -3.74945               | 4.92447                | 3.34623                | -2.19067               | -4.52041               | 1.9987                 | 3.92277                | 3.33742                |
| CAPS     | 0.377523          | 0.154289            | -6.48134             | 1 down vs 2          | 0.907658      | 163.753        | 1082.48   | 1        | 3.11671                | 2.26035                | 2.44753                | 4.44877                | -2.45068               | 1.3976                 | 9.64775                | 39.498                 |
| CARD8    | 0.0811763         | -0.569007           | -1.75745             | 1 down vs 2          | 4.38378       | 216.141        | 295.829   | 1        | -6.15732               | 21.7609                | 2.25317                | -2.84555               | -2.67819               | 2.2856                 | 5.84126                | 2.07384                |
| CASKIN1  | 0.31096           | -0.362855           | -2.75592             | 1 down vs 2          | 1.22395       | 782.102        | 3833.99   | 1        | -10.6174               | 5.03287                | 3.157                  | -2.10009               | -3.59558               | 2.88921                | 69.5644                | -5.71422               |
| CASZ1    | 0.249162          | 0.0500829           | -19.9669             | 1 down vs 2          | 1.62788       | 9296.44        | 34264.7   | 1        | 10.4072                | 172.587                | 3.18425                | 5.28652                | -4.55635               | 3.78582                | 13.2052                | 177.869                |
| CCDC109B | 0.00341245        | -0.787406           | -1.26999             | 1 down vs 2          | 21.8587       | 376.804        | 103.429   | 1        | -4.57026               | 10.9641                | 4.04158                | -7.00627               | -7.15847               | 2.2209                 | 7.99617                | 14.4328                |
| CCDC80   | 0.263673          | -0.348527           | -2.86922             | 1 down vs 2          | 1.52041       | 701.336        | 2767.69   | 1        | -4.51972               | 5.40024                | 2.32668                | -7.64211               | -2.83366               | 6.88516                | 60.737                 | -3.64026               |
| CCL11    | 0.4847            | -0.0146851          | -68.0961             | 1 down vs 2          | 0.554282      | 21251.7        | 230045    | 1        | -3.46176               | 2.59932                | 2.69997                | 14.0971                | -6.01298               | -3.24601               | 6.98208                | -533.643               |
| CCL15    | 0.551344          | 0.603529            | -1.65692             | 1 down vs 2          | 0.39808       | 6.76954        | 102.033   | 1        | -4.21081               | 5.65219                | 5.88324                | 6.47976                | 6.40839                | 1.43204                | 3.03493                | 7.96039                |
| CCL28    | 0.0595373         | -0.464353           | -2.15353             | 1 down vs 2          | 5.37737       | 508.815        | 567.729   | 1        | -4.19854               | 2.45365                | 4.16481                | 3.8413                 | -15.314                | 25.9416                | 16.235                 | 7.45248                |
| CCL5     | 0.159962          | 0.00709399          | -140.964             | 1 down vs 2          | 2.57096       | 222.347        | 518.905   | 1        | 6.79214                | 2.05129                | 26.3247                | -2.29732               | -2.26141               | 10.8127                | 16.5756                | 8.8046                 |
| CCNF     | 0.0231451         | -0.702045           | -1.42441             | 1 down vs 2          | 9.17128       | 151.821        | 99.324    | 1        | -9.63004               | 7.79642                | 3.15787                | 2.29849                | -3.80321               | 4.85825                | 8.23919                | 2.38238                |
| CD163    | 0.096643          | -0.19804            | -5.04948             | 1 down vs 2          | 3.87228       | 4865.09        | 7538.33   | 1        | 2.62247                | 20.3818                | 82.5414                | -25.8812               | -2.00214               | 1.91447                | 14.686                 | 93.0666                |
| CD163    | 0.155716          | -0.0787727          | -12.6948             | 1 down vs 2          | 2.63413       | 17730.4        | 40386.3   | 1        | 3.02115                | 47.9418                | 164.335                | -21.5461               | -2.77734               | 1.66053                | 10.3448                | 226.43                 |
| CD164L2  | 0.856298          | 0.509743            | -1.96177             | 1 down vs 2          | 0.0357342     | 8.47527        | 1423.05   | 1        | 30.8864                | 4.78351                | 2.57255                | -10.4612               | -13.7935               | 3.45992                | 14.8558                | -3.98863               |
| CD1D     | 0.286075          | -0.388696           | -2.57271             | 1 down vs 2          | 1.37074       | 87.3522        | 382.358   | 1        | -2.16135               | -20.6146               | 3.28019                | 4.15043                | 3.74231                | 1.60812                | -3.81849               | -5.03054               |
| CD276    | 0.00962798        | -0.338735           | -2.95216             | 1 down vs 2          | 13.984        | 426.767        | 183.11    | 1        | -4.80318               | 12.3201                | 3.74651                | -2.22787               | -4.42095               | 5.24629                | 19.4152                | 15.6188                |
| CD44     | 0.432424          | 0.045996            | -21.741              | 1 down vs 2          | 0.707786      | 860.165        | 7291.73   | 1        | 8.06503                | 5.01338                | 2.75871                | -2.73773               | -2.2293                | 2.01571                | 4.05883                | 98.4095                |
| CD52     | 0.013621          | -0.413704           | -2.41719             | 1 down vs 2          | 11.9075       | 221.076        | 111.397   | 1        | -3.29792               | 3.35376                | 6.53443                | -2.08197               | -4.15297               | 1.31369                | 13.2402                | 11.9624                |
| CD58     | 0.0588471         | -0.0399068          | -25.0584             | 1 down vs 2          | 5.41694       | 133.644        | 148.029   | 1        | -3.57624               | 6.74923                | 5.69515                | -3.18116               | 5.78544                | 2.39165                | 14.6256                | 11.1313                |
| CD72     | 0.0379426         | -0.0623787          | -16.0311             | 1 down vs 2          | 7.03148       | 406.688        | 347.029   | 1        | -3.08686               | 4.11556                | 19.1366                | 3.18951                | -2.69688               | 16.6875                | 4.93683                | 24.4375                |
| CD83     | 0.220727          | -0.191637           | -5.21819             | 1 down vs 2          | 1.86776       | 813.835        | 2614.36   | 1        | -8.08703               | 8.22903                | 3.04392                | 2.29705                | -4.26138               | 11.9572                | 62.1567                | 2.02968                |
| CDC2     | 0.45084           | 0.014295            | -69.9546             | 1 down vs 2          | 0.650112      | 32078.6        | 296059    | 1        | -8.14993               | 619.002                | 4.13803                | 4.43936                | 9.40126                | 7.15578                | 7.78652                | 25.4012                |
| CDC25C   | 0.212409          | -0.0391515          | -25.5418             | 1 down vs 2          | 1.94661       | 594.788        | 1833.3    | 1        | -5.54245               | 50.1214                | 3.75981                | 6.35777                | -2.82845               | 26.1014                | 3.32827                | 2.3873                 |
| CDCA1    | 0.637006          | 0.525658            | -1.90238             | 1 down vs 2          | 0.24681       | 15215.8        | 369899    | 1        | -93.0529               | 317.073                | 56.7788                | 388.389                | 4.15171                | 10.7417                | 562.788                | 2.18379                |
| CDH12P   | 0.242825          | -0.13992            | -7.14695             | 1 down vs 2          | 1.67776       | 610.123        | 2181.93   | 1        | -2.04583               | 13.9153                | 56.692                 | -2.02397               | -2.57274               | 2.12093                | 3.99221                | 2.40274                |
| CELSR1   | 0.010378          | -0.357786           | -2.79497             | 1 down vs 2          | 13.5141       | 653.738        | 290.247   | 1        | -5.28064               | 5.81862                | 20.2278                | -6.02664               | -3.45367               | 3.79794                | 22.443                 | 16.4863                |
| CES8     | 0.337267          | 0.227513            | -4.39535             | 1 down vs 2          | 1.08722       | 2099.12        | 11584.3   | 1        | -2.94719               | -49.9856               | -12.8528               | -4.08906               | -22.5272               | -133.451               | -5.4132                | -14.8668               |
| CH25H    | 0.916609          | 0.90948             | -1.09953             | 1 down vs 2          | 0.0119234     | 0.940665       | 473.355   | 1        | 16.5836                | 19.9008                | 4.12792                | 7.72791                | -2.96211               | -1.40093               | 3.95804                | 12.538                 |
| CHI3L1   | 0.863876          | 0.611786            | -1.63456             | 1 down vs 2          | 0.0320185     | 63.2738        | 11857     | 1        | 6.03997                | 2.15849                | 7.0609                 | -31.2115               | -2.29235               | -108.792               | 9.5921                 | 15.1617                |
| CHI3L1   | 0.391458          | -0.112582           | -8.88241             | 1 down vs 2          | 0.852526      | 7721.13        | 54340.6   | 1        | 6.97537                | 3.91433                | 4.91361                | -21.8436               | -4.61218               | 1.05803                | 13.2924                | 265.21                 |
| CHI3L2   | 0.536859          | 0.389859            | -2.56503             | 1 down vs 2          | 0.428798      | 1748.41        | 24464.8   | 1        | 54.8253                | 173.726                | 7.53637                | 9.33116                | -5.62105               | -7.72328               | 8.62088                | 68.0821                |
| CHMP6    | 0.0869345         | -0.406707           | -2.45877             | 1 down vs 2          | 4.17885       | 292.923        | 420.58    | 1        | -3.81622               | 15.2388                | 21.4682                | -4.56057               | -2.46437               | -4.42196               | 9.72441                | 2.4171                 |
| CHRM3    | 0.366783          | -0.281507           | -3.55231             | 1 down vs 2          | 0.952464      | 740001         | 4.66E+06  | 1        | -361.797               | 9.50194                | 7.59628                | -6.70544               | -45.5017               | 2405.45                | 31.2369                | -2.66391               |
| CLCF1    | 0.321077          | -0.218466           | -4.57737             | 1 down vs 2          | 1.16931       | 9774.58        | 50155.5   | 1        | 3.97905                | 6.64127                | 13.8072                | -5.59164               | -37.2239               | -8.11391               | 27.5872                | 256.36                 |
| CLEC2D   | 0.271892          | -0.13444            | -7.43828             | 1 down vs 2          | 1.46336       | 1402.48        | 5750.4    | 1        | -14.3125               | 90.1726                | 3.15975                | 6.60166                | -2.01249               | 11.4542                | 12.2989                | 3.456                  |
| CLGN     | 0.478145          | -0.975252           | -1.02538             | 1 down vs 2          | 0.571874      | 15.6929        | 164.648   | 1        | -7.29794               | -2.55622               | -2.99943               | 5.51665                | -2.50387               | 8.00854                | 2.48099                | 2.38929                |
| CLIC1    | 0.0636954         | -0.949031           | -1.05371             | 1 down vs 2          | 5.15146       | 216.883        | 252.608   | 1        | -2.62665               | 3.25795                | 3.62127                | -9.36484               | -3.7192                | -2.0931                | 4.67305                | 18.1316                |
| CLPB     | 0.062995          | -0.983296           | -1.01699             | 1 down vs 2          | 5.18809       | 1971.99        | 2280.6    | 1        | -3.8676                | 42.1215                | 4.02514                | -3.67515               | -40.6931               | 2.0221                 | 30.024                 | 3.56602                |
| CLSTN2   | 0.391101          | -0.0784585          | -12.7456             | 1 down vs 2          | 0.853898      | 1701.69        | 11957.1   | 1        | -4.97205               | 3.54722                | 2.73232                | 2.84809                | -4.45106               | 10.1351                | 125.274                | -2.01786               |
| CMTM7    | 0.0288056         | -0.680911           | -1.46862             | 1 down vs 2          | 8.17901       | 126.994        | 93.1606   | 1        | -4.59031               | 5.19865                | 4.61515                | -2.3637                | -3.04731               | -1.25589               | 3.85312                | 12.0692                |
| CMTM7    | 0.00801782        | -0.653294           | -1.5307              | 1 down vs 2          | 15.1814       | 104.135        | 41.1564   | 1        | -4.23894               | 8.89969                | 6.37536                | -2.53002               | -2.06547               | 1.08118                | 3.13155                | 3.05039                |
| CNR1     | 0.0453617         | -0.428743           | -2.3324              | 1 down vs 2          | 6.34426       | 926.024        | 875.774   | 1        | -7.78326               | 29.5945                | 7.07743                | -4.46869               | -7.75471               | 12.4701                | 31.4463                | -2.81579               |
| COL27A1  | 0.434339          | 0.0817705           | -12.2294             | 1 down vs 2          | 0.701592      | 475.192        | 4063.83   | 1        | 2.43213                | 4.13458                | 4.97687                | 5.97017                | -4.14925               | 1.0182                 | 73.9199                | 2.6372                 |
| COL6A3   | 0.0781318         | -0.738726           | -1.35368             | 1 down vs 2          | 4.50035       | 3015.64        | 4020.54   | 1        | -44.6316               | 5.04615                | 32.6826                | -2.02342               | -4.46167               | 1.56754                | 10.1832                | 65.8467                |
| CP       | 0.434556          | 0.0549891           | -18.1854             | 1 down vs 2          | 0.700892      | 62176.3        | 532261    | 1        | 25.1669                | 840.426                | 21.4308                | 2.7832                 | 3.83857                | -15.0367               | 14.7647                | 101.9                  |
| CPAMD8   | 0.568473          | 0.123649            | -8.08743             | 1 down vs 2          | 0.363827      | 40923.1        | 674877    | 1        | -2.22637               | 58.2452                | -2.17608               | 2.06769                | -62.3753               | -900.534               | -2.04284               | 3.60933                |

| Gene ID     | p-value (1 vs. 2) | MeanRatio (1 vs. 2) | FoldChange (1 vs. 2) | FoldChange (1 vs. 2) | F(Gene Group) | SS(Gene Group) | SS(Error) | F(Error) | FoldChange (106 vs. n) | FoldChange (111 vs. n) | FoldChange (112 vs. n) | FoldChange (121 vs. n) | FoldChange (347 vs. n) | FoldChange (353 vs. n) | FoldChange (537 vs. n) | FoldChange (563 vs. n) |
|-------------|-------------------|---------------------|----------------------|----------------------|---------------|----------------|-----------|----------|------------------------|------------------------|------------------------|------------------------|------------------------|------------------------|------------------------|------------------------|
| CPT1A       | 0.147602          | -0.246251           | -4.06089             | 1 down vs 2          | 2.76182       | 999.565        | 2171.53   | 1        | -3.48543               | 4.64084                | 7.65342                | -2.29765               | -7.90364               | 2.5942                 | 58.3826                | 19.3627                |
| CREB3L4     | 0.0591269         | -0.342592           | -2.91892             | 1 down vs 2          | 5.40083       | 244.262        | 271.361   | 1        | -11.5346               | 15.1618                | 2.94042                | 5.17956                | -2.38236               | 9.991                  | 2.18658                | 12.2265                |
| CRYBB3      | 0.945868          | 0.718193            | -1.39238             | 1 down vs 2          | 0.00501078    | 0.948463       | 1135.71   | 1        | 3.27701                | 31.7971                | -8.20627               | 5.23987                | -3.07912               | -2.57029               | -6.37329               | -2.02817               |
| CRYZ        | 0.0255071         | -0.265507           | -2.73593             | 1 down vs 2          | 8.72134       | 78.3818        | 53.9242   | 1        | -5.01245               | 7.97288                | 2.56708                | 2.54694                | -2.72643               | 2.18068                | 6.20335                | 4.75064                |
| CTHRC1      | 0.220716          | -0.0134163          | -74.5361             | 1 down vs 2          | 1.86786       | 6640.28        | 21330.1   | 1        | -6.15376               | 81.9668                | 5.20746                | -3.27271               | 7.06295                | 13.2787                | 176.885                | 16.2746                |
| CTSC        | 0.0172125         | -0.622225           | -1.60713             | 1 down vs 2          | 10.6386       | 122.221        | 68.9307   | 1        | -2.32692               | 8.5833                 | 3.25456                | -4.66764               | -2.29573               | -1.08247               | 5.68198                | 8.44721                |
| CTSL1       | 0.00641846        | -0.889941           | -1.12367             | 1 down vs 2          | 16.7403       | 133.488        | 47.844    | 1        | -3.27047               | 2.29355                | 3.60938                | -2.38088               | -6.26804               | 1.07208                | 6.67431                | 8.67311                |
| CXCL6       | 0.0769456         | -0.378699           | -2.64062             | 1 down vs 2          | 4.54746       | 249.975        | 329.822   | 1        | -4.18871               | 13.1967                | 15.8655                | 5.61764                | -10.9436               | -1.38922               | 4.53274                | 9.66869                |
| CXCR4       | 0.38489           | -0.005356           | -186.705             | 1 down vs 2          | 0.878103      | 48906.4        | 334173    | 1        | -3.1005                | 28.2479                | 74.3137                | 2.5681                 | -2.04883               | 2.51752                | 675.536                | 22.6011                |
| CYP21A2     | 0.479518          | 0.00351937          | -284.141             | 1 down vs 2          | 0.568154      | 820772         | 8.67E+06  | 1        | 4.46886                | 2.47769                | 11.2329                | 4.86675                | -2.32544               | 3.15882                | 5.69022                | 3297.24                |
| CYP26C1     | 0.914807          | 0.837184            | -1.19448             | 1 down vs 2          | 0.0124467     | 42.5964        | 20533.8   | 1        | -66.2252               | 5.03555                | -7.81097               | -4.74227               | -2.55659               | 1.14909                | -148.67                | 3.9245                 |
| CYP3A7      | 0.419682          | 0.0625236           | -15.994              | 1 down vs 2          | 0.750242      | 73.9557        | 591.455   | 1        | -3.09622               | -3.01913               | -27.2074               | -2.05859               | 3.89823                | 3.66127                | -2.92806               | -4.00282               |
| CYTH2       | 0.0140637         | -0.214127           | -4.67013             | 1 down vs 2          | 11.728        | 57.1286        | 29.2267   | 1        | -3.21402               | 5.86425                | 2.65808                | 2.85336                | -2.55982               | 3.83362                | 4.73401                | 5.64174                |
| D4S234E     | 0.391978          | -0.0410437          | -24.3643             | 1 down vs 2          | 0.850531      | 2933.1         | 20691.3   | 1        | -2.52775               | 10.2138                | 9.14638                | 2.74619                | -4.89645               | 1.3513                 | 166.372                | 2.87727                |
| DBI         | 0.00422116        | -0.539682           | -1.85294             | 1 down vs 2          | 20.0131       | 108.799        | 32.6183   | 1        | -3.48265               | 9.7004                 | 2.35757                | -2.22239               | -2.30509               | 4.93809                | 3.92964                | 3.81151                |
| DCBLD2      | 0.00373647        | -0.673179           | -1.48109             | 1 down vs 2          | 21.0554       | 283.027        | 80.6521   | 1        | -5.64618               | 8.40038                | 3.63052                | -4.65997               | -4.54952               | 2.13027                | 13.1581                | 9.35168                |
| DCBLD2      | 0.0128658         | -0.923472           | -1.08287             | 1 down vs 2          | 12.2323       | 284.083        | 139.344   | 1        | -6.28278               | 3.89833                | 2.76264                | -6.33379               | -5.11231               | 1.58395                | 7.64898                | 16.1029                |
| DCT         | 0.264701          | -0.128142           | -7.80382             | 1 down vs 2          | 1.51313       | 3790.5         | 15030.4   | 1        | -39.3891               | 141.35                 | 23.9435                | 7.41104                | 16.6567                | 4.40509                | 23.649                 | 5.92773                |
| DCX         | 0.587422          | -0.300666           | -3.32595             | 1 down vs 2          | 0.328398      | 37.2874        | 681.259   | 1        | -2.94596               | 7.12733                | 6.00038                | -3.29738               | 3.15077                | -2.655                 | -13.9514               | 20.6216                |
| DDX52       | 0.329766          | -0.110096           | -9.08297             | 1 down vs 2          | 1.12447       | 8367.18        | 44645.9   | 1        | -14.044                | 242.954                | 3.78393                | -2.30681               | -2.62486               | -1.06949               | 60.0336                | -4.81849               |
| DEFB125     | 0.779176          | 0.154291            | -6.48125             | 1 down vs 2          | 0.0860225     | 106.258        | 7411.42   | 1        | -6.10557               | 3.3978                 | -82.1458               | 5.60652                | -3.62119               | 6.31147                | 30.4282                | -2.49882               |
| DHFR        | 0.377233          | -0.184822           | -5.41061             | 1 down vs 2          | 0.908841      | 889.412        | 5871.73   | 1        | -3.12201               | 2.65785                | -2.50508               | -3.96329               | -3.10701               | -3.257                 | 8.63037                | 86.3849                |
| DKFZp667F07 | 0.236817          | -0.944402           | -1.05887             | 1 down vs 2          | 1.72684       | 1172.23        | 4072.98   | 1        | -3.57911               | -10.3679               | 3.27466                | -2.6357                | -30.2184               | -1.6841                | 8.09085                | 64.9833                |
| DKK1        | 0.0233914         | -0.643458           | -1.5541              | 1 down vs 2          | 9.12155       | 172.12         | 113.218   | 1        | -4.15338               | 5.64187                | 3.94961                | -4.45846               | -2.64194               | -1.02139               | 13.5328                | 7.04632                |
| DLEU2       | 0.143637          | -0.953949           | -1.04827             | 1 down vs 2          | 2.82785       | 251.338        | 533.278   | 1        | -16.7307               | 16.517                 | -6.43357               | -3.27459               | 3.0478                 | 2.19548                | 12.8724                | 4.47551                |
| DLGAP2      | 0.531514          | 0.134864            | -7.41489             | 1 down vs 2          | 0.440559      | 378099         | 5.15E+06  | 1        | -149.436               | -65.7895               | -3.90802               | -13.536                | -47.0353               | -4.75657               | 25.0235                | -2545.87               |
| DLGAP5      | 0.174804          | -0.347198           | -2.8802              | 1 down vs 2          | 2.36753       | 6261.34        | 15868     | 1        | -44.322                | 148.35                 | 10.7642                | 2.01607                | -2.37269               | 16.3046                | 36.9473                | 2.10639                |
| DNAH17      | 0.452378          | -0.150497           | -6.64466             | 1 down vs 2          | 0.645481      | 238.868        | 2220.37   | 1        | 26.5238                | -4.66317               | -5.522                 | 5.94137                | -28.0358               | -33.4076               | -2.97399               | -2.48597               |
| DNAJC2      | 0.706593          | 0.316878            | -3.15579             | 1 down vs 2          | 0.155923      | 14.4225        | 554.986   | 1        | -5.79615               | -8.50752               | 18.4465                | -2.28522               | 11.9409                | 1.30868                | 6.20395                | 2.84819                |
| DNMT3B      | 0.348938          | -0.80374            | -1.24418             | 1 down vs 2          | 1.03178       | 13.7609        | 80.0228   | 1        | -2.16054               | 4.56903                | 2.30023                | 3.35238                | -4.81332               | -1.60626               | 4.68198                | -2.43534               |
| DOCK11      | 0.0248303         | -0.378771           | -2.64012             | 1 down vs 2          | 8.84437       | 196.128        | 133.053   | 1        | -3.68371               | 16.9094                | 5.5239                 | -2.23174               | -2.51353               | 1.68543                | 7.82502                | 5.1454                 |
| DOK7        | 0.116506          | -0.238204           | -4.19809             | 1 down vs 2          | 3.35982       | 558.204        | 996.847   | 1        | -2.70148               | 41.9094                | 9.30536                | -4.91448               | -2.34207               | 4.18916                | 8.00439                | 6.26615                |
| DOPEY2      | 0.0508121         | -0.992311           | -1.00775             | 1 down vs 2          | 5.92948       | 201.303        | 203.697   | 1        | -6.97336               | 2.2435                 | 7.01981                | -2.35781               | -6.15115               | 3.20058                | 16.0056                | -2.46567               |
| DPH3        | 0.0225564         | -0.86761            | -1.15259             | 1 down vs 2          | 9.29312       | 118.605        | 76.5758   | 1        | -6.54305               | 9.60034                | 3.65802                | -2.07555               | -2.46574               | -1.43326               | 5.87115                | 3.59662                |
| DPYD        | 0.440569          | -0.0880714          | -11.3544             | 1 down vs 2          | 0.681759      | 22845.8        | 201061    | 1        | -4.0742                | 3.0887                 | 2.54589                | -18.4193               | -4.31061               | -4.75926               | 4.04263                | 502.324                |
| DSE         | 0.000588406       | -0.966417           | -1.03475             | 1 down vs 2          | 43.3737       | 124.684        | 17.2479   | 1        | -3.72277               | 4.36509                | 4.95081                | -2.55537               | -5.74493               | 1.10629                | 4.97946                | 5.33314                |
| DST         | 0.279939          | -0.196818           | -5.08084             | 1 down vs 2          | 1.40994       | 2656.79        | 11306     | 1        | -7.62158               | 14.2657                | 6.59733                | -8.68844               | -2.26101               | -8.88373               | 124.357                | 20.9244                |
| DUSP6       | 0.390731          | -0.188272           | -5.31147             | 1 down vs 2          | 0.855321      | 20237.3        | 141963    | 1        | -35.3572               | 423.392                | 2.61934                | -9.26373               | -4.76075               | -1.40846               | 18.2806                | -5.7345                |
| DYRK3       | 0.0415353         | -0.102544           | -9.75193             | 1 down vs 2          | 6.678         | 165.335        | 148.549   | 1        | -4.02671               | 13.15                  | 3.92338                | 5.06342                | -3.6568                | 5.17514                | 5.90055                | 14.4358                |
| DYRK3       | 0.442572          | -0.0178415          | -56.0492             | 1 down vs 2          | 0.675488      | 95198.2        | 845595    | 1        | -6.64772               | 6.59167                | 10.3751                | 4.93001                | -10.1314               | 7.2331                 | 10.4344                | 39.2481                |
| EEF2K       | 0.0203644         | -0.525087           | -1.90445             | 1 down vs 2          | 9.78727       | 180.923        | 110.913   | 1        | -2.80958               | 2.69831                | 2.4951                 | -3.94594               | -3.39069               | 5.01181                | 6.69394                | 15.3057                |
| EFGBP1      | 0.654161          | 0.613517            | -1.62995             | 1 down vs 2          | 0.222004      | 827.036        | 22351.9   | 1        | -37.729                | -6.04269               | -3.07042               | -7.98407               | -54.305                | -162.17                | -2.10979               | -98.3141               |
| EFNA5       | 0.476302          | 0.2368              | -4.22297             | 1 down vs 2          | 0.576901      | 45.816         | 476.505   | 1        | -5.23064               | 5.33047                | 2.42117                | 2.63702                | 7.19484                | -1.23643               | 2.05318                | 23.8163                |
| EF5         | 0.33515           | -0.98751            | -1.67014             | 1 down vs 2          | 1.0976        | 75.9377        | 415.11    | 1        | -5.44569               | 2.16175                | -2.7732                | 2.02686                | -3.73131               | -2.52627               | 2.04646                | 20.9942                |
| EGFLAM      | 0.221071          | -0.0615585          | -16.2447             | 1 down vs 2          | 1.8646        | 83.554         | 268.865   | 1        | -2.73497               | 11.1846                | 17.1888                | -2.36804               | 3.9417                 | 2.18641                | 2.95989                | -2.07777               |
| EHMT1       | 0.397944          | -0.238481           | -4.19321             | 1 down vs 2          | 0.827952      | 401.83         | 2911.99   | 1        | -3.56106               | -4.36228               | 3.32931                | -2.8214                | -2.07435               | -1.7465                | 59.7649                | 2.11647                |
| EIF4EBP2    | 0.00660054        | -0.993424           | -1.00662             | 1 down vs 2          | 16.5379       | 114.377        | 41.4963   | 1        | -7.0186                | 4.07227                | 2.28038                | -2.31399               | -2.34423               | 2.58525                | 8.35826                | 2.29403                |
| ELAC1       | 0.0426962         | -0.726469           | -1.37652             | 1 down vs 2          | 6.5725        | 545.785        | 498.244   | 1        | -15.8544               | 13.0622                | 17.2319                | -2.34063               | -3.34219               | 1.35559                | 19.9713                | -2.21025               |
| ELAVL2      | 0.464407          | -0.029149           | -34.3065             | 1 down vs 2          | 0.610206      | 1.94E+06       | 1.91E+07  | 1        | -80.0676               | 72.6306                | 10.4123                | -2.82468               | -3.6377                | 6.27897                | 4899.4                 | -41.1539               |
| EME1        | 0.078182          | -0.132169           | -7.56606             | 1 down vs 2          | 4.49838       | 426.195        | 568.465   | 1        | -7.88529               | 15.5974                | 10.006                 | 5.7145                 | -3.10933               | 2.20596                | 7.98595                | 30.7875                |
| EMP1        | 0.0343837         | -0.0956433          | -10.4555             | 1 down vs 2          | 7.4292        | 156.289        | 126.223   | 1        | 3.40122                | 10.7565                | 2.2884                 | -3.2224                | -2.56977               | 3.82275                | 11.0262                | 13.7705                |
| EMR4        | 0.365202          | -0.171378           | -5.83507             | 1 down vs 2          | 0.959243      | 1019.38        | 6376.16   | 1        | -4.33605               | 2.9959                 | 9.84492                | -2.73294               | -3.16502               | -1.16008               | 90.7749                | -2.92868               |

| Gene ID  | p-value (1 vs. 2) | MeanRatio (1 vs. 2) | FoldChange (1 vs. 2) | FoldChange (1 vs. 2) | F(Gene Group) | SS(Gene Group) | SS(Error) | F(Error) | FoldChange (106 vs. n) | FoldChange (111 vs. n) | FoldChange (112 vs. n) | FoldChange (121 vs. n) | FoldChange (347 vs. n) | FoldChange (353 vs. n) | FoldChange (537 vs. n) | FoldChange (563 vs. n) |
|----------|-------------------|---------------------|----------------------|----------------------|---------------|----------------|-----------|----------|------------------------|------------------------|------------------------|------------------------|------------------------|------------------------|------------------------|------------------------|
| ENTPD8   | 0.098943          | -0.0069579          | -143.722             | 1 down vs 2          | 3.8058        | 228.044        | 359.521   | 1        | -5.88246               | 3.33656                | 15.9254                | 2.20962                | 3.44423                | 10.2583                | 23.0942                | 2.146                  |
| EPB41    | 0.419797          | -0.0506468          | -19.7446             | 1 down vs 2          | 0.749848      | 58963.1        | 471800    | 1        | -26.2171               | 10.3809                | 2.13588                | 2.71524                | -2.14335               | 781.357                | 55.6645                | -5.61552               |
| EPHA10   | 0.8483            | 0.579878            | -1.7245              | 1 down vs 2          | 0.039886      | 10.1831        | 1531.82   | 1        | -4.37593               | -4.69952               | 9.79091                | -2.15201               | -3.12191               | -36.7215               | 12.1745                | -8.27969               |
| EPHB1    | 0.197929          | -0.0491202          | -20.3582             | 1 down vs 2          | 2.09507       | 416.555        | 1192.96   | 1        | -3.27612               | 4.04387                | 3.19071                | 3.799                  | -2.61647               | 16.2343                | 43.1549                | 4.29247                |
| ERAP1    | 0.134624          | -0.647429           | -1.54457             | 1 down vs 2          | 2.98789       | 91.8927        | 184.53    | 1        | -2.36281               | 4.39882                | 2.12056                | -2.83329               | -3.05756               | -3.02319               | 15.3575                | 2.39359                |
| ESPL1    | 0.247441          | 0.0228136           | -43.8336             | 1 down vs 2          | 1.64124       | 1082.59        | 3957.72   | 1        | -10.9905               | 23.9298                | 2.42129                | 4.88613                | 7.78731                | 77.57                  | 9.56345                | 9.46423                |
| EXT2     | 0.0143436         | -0.974852           | -1.0258              | 1 down vs 2          | 11.6184       | 72.7267        | 37.5576   | 1        | -3.62304               | 3.93453                | 2.11397                | -2.53035               | -3.0696                | -1.18672               | 7.16422                | 3.74219                |
| EXTL1    | 0.3446            | -0.629521           | -1.58851             | 1 down vs 2          | 1.05204       | 157.695        | 899.367   | 1        | -9.24729               | -2.86635               | 2.40137                | 2.9846                 | -4.36599               | 2.47051                | 30.6785                | -4.54445               |
| FAM115A  | 0.761114          | 0.539289            | -1.8543              | 1 down vs 2          | 0.101254      | 54.1794        | 3210.51   | 1        | -3.6039                | 2.09093                | 4.07429                | -10.2475               | -5.02546               | -19.8069               | 12.6837                | -57.3808               |
| FAM136B  | 0.352227          | -0.391435           | -2.5547              | 1 down vs 2          | 1.01668       | 2239.8         | 13218.4   | 1        | -22.31                 | 2.32178                | -4.98503               | -2.06359               | -4.79548               | 2.61782                | 126.568                | -2.32549               |
| FAM169A  | 0.670204          | 0.350928            | -2.84959             | 1 down vs 2          | 0.200273      | 77.9073        | 2334.03   | 1        | -4.8771                | 6.0147                 | -3.91081               | -2.25445               | -3.32371               | -4.45641               | 4.92812                | -52.2309               |
| FAM64A   | 0.363519          | -0.0258157          | -38.7362             | 1 down vs 2          | 0.966505      | 59747.1        | 370906    | 1        | -21.8527               | 708.625                | 2.37218                | 10.6139                | -2.2382                | 15.2823                | 139.173                | 4.62635                |
| FAM71E1  | 0.0806739         | -0.376388           | -2.65683             | 1 down vs 2          | 4.40261       | 109.961        | 149.859   | 1        | -4.73836               | 4.84352                | 5.25624                | 3.2424                 | -4.78659               | 9.56149                | 10.6417                | -2.48349               |
| FAM75A7  | 0.108139          | -0.579832           | -1.72464             | 1 down vs 2          | 3.5598        | 156.653        | 264.037   | 1        | -5.56893               | 8.99306                | 2.32325                | 2.15704                | -6.65236               | 2.84659                | 16.9187                | -2.15297               |
| FAM78B   | 0.10113           | -0.582524           | -1.71667             | 1 down vs 2          | 3.74453       | 470.918        | 754.569   | 1        | -3.29445               | 34.0641                | 4.18745                | -4.35659               | -9.84971               | 2.84871                | 6.06515                | 2.90622                |
| FAM96A   | 0.00155007        | -0.995391           | -1.00463             | 1 down vs 2          | 29.98         | 83.6803        | 16.7472   | 1        | -5.09008               | 5.79965                | 2.41576                | -2.10796               | -2.79961               | 1.25205                | 4.10306                | 3.16938                |
| FARP1    | 0.538414          | -0.0355696          | -28.1139             | 1 down vs 2          | 0.42542       | 10.997         | 155.099   | 1        | -2.56679               | 6.89836                | 2.96702                | -2.94809               | 5.26533                | -1.03077               | 7.67115                | -4.81271               |
| FBLN1    | 0.0527138         | -0.698573           | -1.43149             | 1 down vs 2          | 5.7987        | 60.0512        | 62.1359   | 1        | -2.98143               | 3.51072                | 2.44526                | 3.04922                | -7.05026               | 1.92214                | 6.0409                 | 2.73987                |
| FBLN2    | 0.0269422         | -0.195416           | -5.11729             | 1 down vs 2          | 8.47444       | 362.695        | 256.792   | 1        | -4.56831               | 17.8199                | 5.45731                | 2.58467                | -4.83711               | 4.94242                | 21.2141                | 8.73922                |
| FBXO16   | 0.00193408        | -0.995391           | -1.25206             | 1 down vs 2          | 27.4818       | 341.406        | 74.5378   | 1        | -9.9899                | 4.46523                | 5.0002                 | -2.14372               | -5.84167               | 10.5927                | 11.2217                | 5.92494                |
| FBXO17   | 0.488889          | -0.0137714          | -72.6145             | 1 down vs 2          | 0.543271      | 1762.25        | 19462.7   | 1        | 5.82906                | -3.16911               | 2.58098                | 2.16225                | -9.24068               | 1.84198                | 154.502                | -4.55185               |
| FBXO30   | 0.433228          | -0.0697461          | -14.3377             | 1 down vs 2          | 0.705181      | 4123.46        | 35084.3   | 1        | -2.86221               | 3.76831                | 2.10512                | -2.03682               | -4.27354               | -1.19218               | 211.33                 | 3.17816                |
| FCGBP    | 0.0125729         | -0.190058           | -5.26155             | 1 down vs 2          | 12.3653       | 585.84         | 284.267   | 1        | 2.59339                | 14.24                  | 3.41024                | -7.16676               | -3.89555               | 13.7682                | 18.5893                | 24.2584                |
| FCGBP    | 0.0150066         | -0.136832           | -7.30825             | 1 down vs 2          | 11.3699       | 408.734        | 215.692   | 1        | 2.1263                 | 22.4081                | 3.21979                | -4.21083               | -3.24675               | 11.9428                | 11.9286                | 15.4379                |
| FCGR2B   | 0.368846          | -0.136651           | -7.31791             | 1 down vs 2          | 0.943695      | 9080.01        | 57730.6   | 1        | -2.31828               | -3.25275               | 7.11947                | -20.0949               | -2.68543               | 3.71489                | 275.023                | 23.5109                |
| FCN3     | 0.00763885        | -0.768359           | -1.30147             | 1 down vs 2          | 15.5108       | 637.123        | 246.456   | 1        | -3.60379               | 13.2002                | 12.7088                | -17.8552               | -2.56948               | 3.891                  | 6.47944                | 15.8413                |
| FGF5     | 0.43065           | 0.0357673           | -27.9585             | 1 down vs 2          | 0.713568      | 302.401        | 2542.72   | 1        | -3.29856               | 3.0509                 | -52.3553               | 5.23822                | -3.3529                | -1.76256               | 8.39196                | -23.1785               |
| FGFBP2   | 0.827031          | 0.693028            | -1.44294             | 1 down vs 2          | 0.0520983     | 132.331        | 15240.2   | 1        | 11.8847                | 17.3497                | 6.88612                | 40.1902                | 4.82392                | 45.8245                | 115.87                 | -49.094                |
| FGFR1    | 0.784927          | 0.390369            | -2.56168             | 1 down vs 2          | 0.0814586     | 15.7597        | 1160.81   | 1        | -2.56848               | 13.3776                | 3.56295                | -11.7725               | 19.9103                | 20.9609                | -9.49785               | -4.62558               |
| FJX1     | 0.0432638         | -0.424762           | -2.35426             | 1 down vs 2          | 6.52231       | 1012.56        | 931.47    | 1        | -10.41                 | 21.0939                | 12.1236                | -6.86462               | -3.5096                | 5.62918                | 40.0919                | 2.61379                |
| FLJ11235 | 0.016445          | -0.568842           | -1.75796             | 1 down vs 2          | 10.878        | 400.735        | 221.033   | 1        | -4.59002               | 18.0317                | 7.15927                | -2.01331               | -9.29903               | 3.74408                | 15.2163                | 2.44143                |
| FLJ25076 | 0.895891          | 0.771206            | -1.29667             | 1 down vs 2          | 0.0186323     | 0.513645       | 165.405   | 1        | -5.29275               | -5.16619               | -10.1494               | 2.36823                | -2.36818               | 1.63284                | 4.78244                | -2.53784               |
| FLJ30092 | 0.968385          | 0.921984            | -1.08462             | 1 down vs 2          | 0.00170698    | 0.528242       | 1856.76   | 1        | -3.06019               | 4.00873                | 21.0024                | 38.0401                | -16.1617               | 2.11008                | 2.1795                 | 4.71688                |
| FLJ35934 | 0.799597          | 0.563039            | -1.77608             | 1 down vs 2          | 0.0704279     | 87.0934        | 7419.79   | 1        | -4.22988               | 2.38379                | 3.88332                | 4.3345                 | -26.4503               | -1.73124               | -89.7509               | 7.22851                |
| FLJ37078 | 0.423179          | -0.0817457          | -12.2331             | 1 down vs 2          | 0.738375      | 3290.26        | 26736.5   | 1        | -3.34713               | 3.20571                | 4.84416                | -3.24869               | -2.90095               | 2.87395                | 184.899                | -2.19864               |
| FLJ37201 | 0.280884          | -0.0940743          | -10.6299             | 1 down vs 2          | 1.40382       | 400.122        | 1710.14   | 1        | -2.63725               | 5.37189                | 46.5697                | 2.20796                | -3.33897               | 4.79894                | 17.5092                | -7.48937               |
| FLJ37228 | 0.655416          | 0.506171            | -1.97562             | 1 down vs 2          | 0.220254      | 61.7072        | 1680.98   | 1        | -8.85482               | 3.0766                 | 2.14003                | -2.95173               | -5.83387               | -39.7006               | 3.52363                | -27.1242               |
| FLJ41352 | 0.747666          | 0.539643            | -1.85308             | 1 down vs 2          | 0.1135        | 4.76275        | 251.776   | 1        | -3.29306               | 8.04713                | -5.38096               | 5.05258                | 3.84529                | -3.51447               | 9.28907                | 8.86948                |
| FLJ44005 | 0.975481          | 0.211611            | -4.72566             | 1 down vs 2          | 0.00102639    | 0.121041       | 707.573   | 1        | 3.17369                | 2.62341                | 18.9197                | -5.67245               | 2.29417                | -3.7003                | -16.54                 | -2.91418               |
| FLJ45079 | 0.384951          | 0.0492052           | -20.3231             | 1 down vs 2          | 0.877861      | 3464.61        | 23679.9   | 1        | -5.64585               | 3.6716                 | -55.311                | -3.2428                | 2.21487                | -1.27662               | 2.3272                 | -175.464               |
| FLNC     | 0.278812          | -0.126028           | -7.93473             | 1 down vs 2          | 1.41728       | 230.999        | 977.924   | 1        | -3.45299               | 3.35643                | 2.3224                 | 3.05582                | -3.3297                | 2.14089                | 4.07409                | 37.3924                |
| FMO9P    | 0.98912           | 0.970613            | -1.03028             | 1 down vs 2          | 0.00020204    | 0.0205123      | 609.151   | 1        | 5.07814                | -5.62256               | 23.563                 | -2.77339               | 8.05908                | 1.79978                | -3.96443               | 2.02023                |
| FN3K     | 0.569025          | 0.221305            | -4.51864             | 1 down vs 2          | 0.362759      | 12635.6        | 208992    | 1        | -52.0437               | -3.67976               | -2.47634               | -6.99435               | -10.9532               | -513.012               | 2.49802                | -10.4388               |
| FNDC3B   | 0.00709491        | -0.431951           | -2.31508             | 1 down vs 2          | 16.0238       | 182.346        | 68.2781   | 1        | -4.29235               | 8.43618                | 4.74042                | -2.15316               | -2.4788                | 2.58988                | 13.0871                | 5.58055                |
| FNDC3B   | 0.00299029        | -0.362599           | -2.75787             | 1 down vs 2          | 23.0728       | 200.249        | 52.0742   | 1        | -3.13136               | 9.65928                | 4.76821                | -2.65253               | -2.46631               | 2.91146                | 11.5386                | 9.04409                |
| FOXL2    | 0.111348          | -0.414897           | -2.41024             | 1 down vs 2          | 3.48066       | 123.794        | 213.398   | 1        | 6.91618                | -13.8061               | -9.58725               | -3.45623               | 3.68807                | -3.93656               | -4.08096               | 2.69682                |
| FOXP2    | 0.464759          | -0.0369539          | -27.0608             | 1 down vs 2          | 0.609199      | 121085         | 1.19E+06  | 1        | -29.9816               | 4.0668                 | 2.47733                | 5.58922                | -2.77614               | 3.60268                | 1221.51                | -6.32201               |
| FPR3     | 0.183389          | -0.19215            | -8.38822             | 1 down vs 2          | 2.26069       | 17038.5        | 45221.2   | 1        | -17.4608               | 12.8832                | 192.389                | -9.45771               | -3.54313               | 3.60868                | 210.134                | 6.84996                |
| FST      | 0.256982          | 0.0334241           | -29.9186             | 1 down vs 2          | 1.56884       | 5264.38        | 20133.5   | 1        | -2.17505               | 177.224                | 2.68101                | 3.52839                | 4.14356                | 8.96793                | 40.6659                | 44.56                  |
| FXYD5    | 0.187129          | -0.141945           | -7.04497             | 1 down vs 2          | 2.21634       | 373.406        | 1010.87   | 1        | 2.50892                | 8.11253                | 5.709                  | -3.66119               | -4.11017               | 3.7253                 | 4.0091                 | 40.2336                |
| GAB3     | 0.271931          | -0.521475           | -1.91764             | 1 down vs 2          | 1.46309       | 9881.41        | 40522.8   | 1        | -4.91275               | 221.966                | 2.73934                | -3.74059               | -65.9913               | 1.30844                | 3.71279                | 8.84252                |
| GALNT9   | 0.325078          | -0.560355           | -1.78458             | 1 down vs 2          | 1.14844       | 2374.43        | 12405.2   | 1        | -20.8348               | -12.701                | 119.866                | -2.02004               | -15.4841               | -1.53381               | 15.4038                | -7.00339               |

| Gene ID   | p-value (1 vs. 2) | MeanRatio (1 vs. 2) | FoldChange (1 vs. 2) | FoldChange (1 vs. 2) | F(Gene Group) | SS(Gene Group) | SS(Error) | F(Error) | FoldChange (106 vs. n) | FoldChange (111 vs. n) | FoldChange (112 vs. n) | FoldChange (121 vs. n) | FoldChange (347 vs. n) | FoldChange (353 vs. n) | FoldChange (537 vs. n) | FoldChange (563 vs. n) |
|-----------|-------------------|---------------------|----------------------|----------------------|---------------|----------------|-----------|----------|------------------------|------------------------|------------------------|------------------------|------------------------|------------------------|------------------------|------------------------|
| GALR1     | 0.335762          | -0.0073195          | -136.622             | 1 down vs 2          | 1.09459       | 17649.1        | 96743.5   | 1        | 3.4706                 | 85.9658                | 6.80604                | -2.051                 | -3.53452               | 13.0132                | 7.7777                 | 368.012                |
| GAP43     | 0.0196149         | -0.784402           | -1.27486             | 1 down vs 2          | 9.9729        | 462.394        | 278.19    | 1        | -4.9467                | 3.52311                | 5.60541                | -5.71894               | -10.044                | 1.63352                | 21.6883                | 11.5527                |
| GAPT      | 0.136157          | -0.533653           | -1.87388             | 1 down vs 2          | 2.95964       | 957.872        | 1941.87   | 1        | 6.64149                | -2.93384               | 38.571                 | -21.0873               | -9.14845               | 1.40894                | 33.672                 | 2.96977                |
| GAS1      | 0.103354          | -0.661402           | -1.51194             | 1 down vs 2          | 3.68403       | 281.715        | 458.815   | 1        | -6.14096               | 9.44337                | 4.64765                | -4.51862               | -3.97959               | 1.27302                | 24.6259                | -3.10068               |
| GAS1      | 0.016479          | -0.772004           | -1.29533             | 1 down vs 2          | 10.8671       | 312.458        | 172.516   | 1        | -8.00784               | 12.5729                | 3.96646                | -3.12093               | -5.74342               | 1.97657                | 15.5812                | 2.32794                |
| GBA3      | 0.437591          | 0.156977            | -6.37036             | 1 down vs 2          | 0.691181      | 47.0719        | 408.621   | 1        | -6.18131               | 11.0078                | 2.20602                | 6.09932                | 2.88096                | -4.36356               | 2.02673                | 18.8404                |
| GCNT2     | 0.273327          | -0.237898           | -4.20348             | 1 down vs 2          | 1.45366       | 300.992        | 1242.35   | 1        | -6.12282               | 39.6903                | 4.32109                | 6.87991                | -8.06181               | -1.49883               | 3.91538                | 4.74752                |
| GDF9      | 0.0393575         | -0.191993           | -5.20853             | 1 down vs 2          | 6.88709       | 56.684         | 49.3829   | 1        | -3.56249               | 5.49652                | 3.02601                | 3.02853                | -2.12286               | 3.06674                | 8.66532                | 2.80896                |
| GEM       | 0.140029          | -0.0679935          | -14.7073             | 1 down vs 2          | 2.89018       | 944.683        | 1961.16   | 1        | -2.04067               | 11.0055                | 7.02577                | 2.25694                | -4.50336               | 2.9447                 | 27.3926                | 56.7172                |
| GEMIN6    | 0.00256561        | -0.993128           | -1.00692             | 1 down vs 2          | 24.5499       | 108.685        | 26.5626   | 1        | -5.24056               | 4.86499                | 2.05785                | -2.09712               | -4.04318               | 1.29201                | 7.12707                | 3.75743                |
| GFRA1     | 0.505228          | -0.0328918          | -30.4027             | 1 down vs 2          | 0.501942      | 16.3122        | 194.989   | 1        | -4.64427               | 4.10506                | 2.17005                | -2.56416               | 6.92665                | 1.1767                 | 10.9438                | -4.1175                |
| GGT1      | 0.0183105         | -0.943314           | -1.06009             | 1 down vs 2          | 10.3198       | 123.678        | 71.9071   | 1        | -5.74185               | 5.83537                | 8.72037                | -3.52177               | -2.56354               | -2.04163               | 5.69564                | 2.68672                |
| GH1       | 0.390045          | -0.139168           | -7.18558             | 1 down vs 2          | 0.857967      | 4296.79        | 30048.6   | 1        | -3.50804               | 196.215                | 3.20539                | -11.5207               | -2.51586               | 1.51127                | 16.3036                | -7.12181               |
| GIYD1     | 0.366841          | 0.109083            | -9.16732             | 1 down vs 2          | 0.952218      | 238.483        | 1502.7    | 1        | -5.81155               | -43.7106               | -3.29742               | -2.94335               | 4.61233                | -1.01756               | 2.53561                | -17.8038               |
| GLB1      | 0.000881566       | -0.591452           | -1.69075             | 1 down vs 2          | 37.253        | 121.407        | 19.5539   | 1        | -2.61333               | 4.39131                | 4.0712                 | -2.49487               | -3.86336               | 3.12787                | 8.69889                | 4.99189                |
| GLB1      | 0.00129525        | -0.455831           | -2.19379             | 1 down vs 2          | 32.1474       | 142.938        | 26.678    | 1        | -2.1341                | 6.47528                | 3.65119                | -2.62775               | -3.43955               | 3.67676                | 9.8119                 | 6.37183                |
| GLB1L2    | 0.486833          | 0.0224595           | -44.5246             | 1 down vs 2          | 0.548653      | 3.86E+06       | 4.22E+07  | 1        | -3.6667                | 70.8624                | -21.1208               | 109.841                | -7.30742               | 8.79211                | 7275.88                | 2.26643                |
| GLCC1     | 0.367198          | -0.122429           | -8.16801             | 1 down vs 2          | 0.950696      | 2507.41        | 15824.7   | 1        | -11.8932               | 141.047                | 3.93671                | 4.16479                | -4.23784               | 3.25388                | 29.4126                | -14.7494               |
| GLIPR1    | 0.0974003         | -0.218183           | -4.58332             | 1 down vs 2          | 3.85015       | 2416.69        | 3766.12   | 1        | -4.50149               | 33.1184                | 80.7716                | -10.7118               | -4.077                 | 4.91422                | 18.0613                | 10.4904                |
| GNS       | 0.00503397        | -0.250204           | -1.59994             | 1 down vs 2          | 18.5815       | 105.335        | 34.013    | 1        | -2.16202               | 3.90582                | 2.80961                | -2.5731                | -3.91346               | 1.7155                 | 5.64517                | 8.98588                |
| GNPMB     | 0.0573963         | -0.112597           | -8.88123             | 1 down vs 2          | 5.50222       | 1585.78        | 1729.24   | 1        | -2.01992               | 8.84348                | 29.4558                | -3.69535               | -3.11412               | 6.32796                | 58.1056                | 27.9603                |
| GPR103    | 0.482971          | -0.0016561          | -603.816             | 1 down vs 2          | 0.55888       | 346207         | 3.72E+06  | 1        | -2.65731               | 2.34771                | 2153.33                | 2.5799                 | -2.05399               | 2.3316                 | -3.80595               | -9.24751               |
| GPR125    | 0.0124604         | -0.301644           | -3.31517             | 1 down vs 2          | 12.4174       | 56.6991        | 27.3965   | 1        | -2.54142               | 2.82811                | 3.56461                | 2.58649                | -3.86813               | 5.39873                | 4.62587                | 4.70616                |
| GPR144    | 0.44953           | -0.0075481          | -132.484             | 1 down vs 2          | 0.654076      | 1528.76        | 11528.6   | 1        | 3.22639                | -4.16739               | -120.93                | 2.30079                | -4.94532               | -10.8902               | 4.67099                | 2.83815                |
| GPR19     | 0.0941184         | -0.597104           | -1.67475             | 1 down vs 2          | 3.94781       | 233.791        | 355.323   | 1        | -11.5642               | 14.03                  | 4.96817                | 2.43145                | -3.39148               | 4.25242                | 15.6706                | -3.96293               |
| GPR32     | 0.538497          | -0.0832872          | -12.0066             | 1 down vs 2          | 0.425241      | 3620.15        | 51079.2   | 1        | -2.4864                | -2.00387               | -241.439               | 3.36187                | 9.25942                | 2.5723                 | 8.8121                 | 29.2485                |
| GPR65     | 0.0545828         | -0.921807           | -1.08483             | 1 down vs 2          | 5.67623       | 973.719        | 1029.26   | 1        | -2.01443               | 5.0705                 | 23.2457                | -24.7794               | -5.99814               | -1.31146               | 2.95617                | 29.3284                |
| GPR81     | 0.135383          | -0.198086           | -5.04831             | 1 down vs 2          | 2.97385       | 7829.21        | 15796.1   | 1        | -46.7981               | 23.5356                | -4.08152               | 33.274                 | -18.5272               | 78.0904                | 138.79                 | 33.3402                |
| GPRIN2    | 0.545049          | -0.181841           | -5.4993              | 1 down vs 2          | 0.411226      | 8.56001        | 124.895   | 1        | -2.44235               | -2.40153               | 3.4238                 | -2.56815               | 4.02424                | -4.29567               | 5.42853                | 6.88443                |
| GPX3      | 0.0524921         | 0.11041             | -9.05711             | 1 down vs 2          | 5.81361       | 150.907        | 155.745   | 1        | 4.42862                | 6.92111                | 10.7857                | 4.40347                | -5.49171               | 6.08887                | 8.67829                | 17.9497                |
| GRIK2     | 0.164692          | -0.736031           | -1.35864             | 1 down vs 2          | 2.50334       | 615.676        | 1475.65   | 1        | -24.7518               | 13.917                 | 2.2231                 | 3.72304                | -2.01935               | 1.29786                | 36.9046                | -2.15248               |
| GSTM5     | 0.961587          | 0.950531            | -1.05204             | 1 down vs 2          | 0.00252073    | 7.84989        | 18684.8   | 1        | -45.5959               | -32.2499               | -2.92902               | -16.1439               | -56.2074               | -8.42252               | -4.34083               | -158.867               |
| GZMK      | 0.314118          | 0.10254             | -9.75226             | 1 down vs 2          | 1.2066        | 95.6345        | 475.556   | 1        | 3.76623                | 22.3605                | 3.77702                | -7.88753               | 6.56928                | 7.50527                | 9.59826                | -3.45217               |
| H1FO      | 0.0331511         | -0.33614            | -2.97495             | 1 down vs 2          | 7.58009       | 56.4517        | 44.6842   | 1        | -3.89245               | 3.7236                 | 2.10507                | 2.54721                | -2.79597               | 1.76842                | 6.76058                | 6.17549                |
| HCN3      | 0.164168          | -0.18814            | -5.31519             | 1 down vs 2          | 2.5107        | 168.537        | 402.766   | 1        | -5.55803               | 6.08143                | 2.80815                | 4.70636                | -3.65216               | 2.13844                | 24.3177                | 4.55211                |
| HECTD2    | 0.0530122         | -0.783591           | -1.27618             | 1 down vs 2          | 5.77875       | 538.848        | 559.478   | 1        | -9.4141                | 25.7025                | 6.90187                | -8.9701                | -3.95913               | 3.12874                | 16.026                 | -4.23575               |
| HERC2P4   | 0.390793          | 0.00820571          | -121.866             | 1 down vs 2          | 0.855083      | 21277.9        | 149304    | 1        | -3.34998               | 441.663                | 107.216                | 8.43486                | -2.44077               | 1.26826                | -17.7919               | 4.69112                |
| HES4      | 0.0399357         | -0.111466           | -8.97135             | 1 down vs 2          | 6.83007       | 171.468        | 150.629   | 1        | -2.6542                | 12.8325                | 3.04441                | 2.35347                | -2.57639               | 7.69877                | 16.1273                | 3.31645                |
| HEXB      | 0.000816949       | -0.688548           | -1.45233             | 1 down vs 2          | 38.3432       | 157.748        | 24.6846   | 1        | -3.46284               | 7.70858                | 4.56302                | -2.72477               | -5.03316               | 1.81862                | 6.04698                | 7.02327                |
| HGF       | 0.16063           | 0.0337211           | -29.655              | 1 down vs 2          | 2.56124       | 1797.1         | 4209.91   | 1        | -2.7522                | 5.49363                | 4.32804                | 2.48728                | -2.76482               | 43.4768                | 15.9624                | 80.52                  |
| HGF       | 0.164076          | 0.0776004           | -12.8865             | 1 down vs 2          | 2.51199       | 100.289        | 239.544   | 1        | 6.17808                | 6.44366                | 13.7131                | -7.83774               | 3.50549                | -1.11697               | 10.4397                | 10.1644                |
| HIGD2B    | 0.0743404         | -0.610062           | -1.63918             | 1 down vs 2          | 4.65449       | 403.875        | 520.627   | 1        | 12.8909                | 5.12045                | -21.7338               | -2.3775                | 6.16965                | -6.3607                | -14.8001               | -7.80334               |
| HIST1H2BF | 0.484837          | 0.10468             | -9.55297             | 1 down vs 2          | 0.55392       | 8886.88        | 96261.7   | 1        | -10.2044               | 14.3652                | 353.106                | 29.1766                | 5.17566                | 2.69682                | 11.5086                | 2.79619                |
| HIST1H2BG | 0.337712          | 0.0613155           | -16.3091             | 1 down vs 2          | 1.08505       | 1118.83        | 6186.8    | 1        | -4.0621                | 17.2793                | 93.9441                | 11.059                 | -2.21                  | -1.12224               | 17.4634                | 2.55199                |
| HK2       | 0.270124          | -0.0345519          | -28.942              | 1 down vs 2          | 1.47541       | 1924.93        | 7828.03   | 1        | -3.08902               | 33.7866                | 5.58857                | 3.38778                | -3.50907               | 1.15776                | 7.73772                | 106.584                |
| HLA-DMA   | 0.150151          | -0.150436           | -6.64734             | 1 down vs 2          | 2.72066       | 216.988        | 478.533   | 1        | 2.17626                | 8.37316                | 6.47243                | -4.03092               | -2.36549               | 1.55716                | 2.52595                | 27.8259                |
| HLA-DPB1  | 0.278052          | -0.042856           | -23.3339             | 1 down vs 2          | 1.42225       | 1011.63        | 4267.74   | 1        | 3.34396                | 9.2241                 | 10.8631                | -2.78422               | -3.42339               | 4.72738                | 6.20042                | 80.3521                |
| HLA-DRB4  | 0.225254          | -0.0258608          | -38.6685             | 1 down vs 2          | 1.82664       | 98260.1        | 322758    | 1        | -3.34442               | 39.5248                | 12.7559                | -10.9339               | -3.03433               | 3.94912                | 463.957                | 595.57                 |
| HLA-DRB6  | 0.197558          | -0.31604            | -3.16416             | 1 down vs 2          | 2.09908       | 74.3911        | 212.639   | 1        | 2.91495                | 13.962                 | 9.28034                | -4.33911               | -3.11373               | 1.33961                | 2.31587                | -2.96682               |
| HLA-F     | 0.00139894        | -0.801838           | -1.24714             | 1 down vs 2          | 31.202        | 72.666         | 13.9733   | 1        | -2.24982               | 3.34021                | 2.86591                | -3.22984               | -2.83141               | 1.16834                | 3.64135                | 6.25924                |
| HMOX1     | 0.0620136         | -0.666781           | -1.49974             | 1 down vs 2          | 5.24035       | 96.8998        | 110.947   | 1        | 2.03695                | 7.3571                 | 3.83976                | -7.61224               | -3.05225               | -2.27239               | 7.62987                | 5.0108                 |
| HNRPM     | 0.374289          | -0.304047           | -3.28896             | 1 down vs 2          | 0.920931      | 21787.6        | 141949    | 1        | -79.95                 | 414.086                | -2.05981               | -3.01404               | 7.56375                | -3.16876               | 7.72804                | -3.27099               |

| Gene ID | p-value (1 vs. 2) | MeanRatio (1 vs. 2) | FoldChange (1 vs. 2) | FoldChange (1 vs. 2) | F(Gene Group) | SS(Gene Group) | SS(Error) | F(Error) | FoldChange (106 vs. n) | FoldChange (111 vs. n) | FoldChange (112 vs. n) | FoldChange (121 vs. n) | FoldChange (347 vs. n) | FoldChange (353 vs. n) | FoldChange (537 vs. n) | FoldChange (563 vs. n) |
|---------|-------------------|---------------------|----------------------|----------------------|---------------|----------------|-----------|----------|------------------------|------------------------|------------------------|------------------------|------------------------|------------------------|------------------------|------------------------|
| HOPX    | 0.200494          | -0.777887           | -1.28553             | 1 down vs 2          | 2.06765       | 8591.23        | 24930.4   | 1        | -3.34413               | -12.2326               | 10.1456                | -74.6684               | -10.8381               | 163.334                | 44.1508                | -15.0303               |
| HOXB3   | 0.528379          | 0.46328             | -2.15852             | 1 down vs 2          | 0.447567      | 103.243        | 1384.06   | 1        | -8.766                 | 26.9883                | -2.7826                | 2.41678                | 25.5645                | 1.90467                | 27.0606                | 15.9567                |
| HPGD5   | 0.174788          | -0.721051           | -1.38686             | 1 down vs 2          | 2.36774       | 1774.22        | 4495.99   | 1        | 4.23394                | 2.71659                | -2.73562               | -2.95264               | -39.9444               | 15.83                  | 68.3903                | 5.16619                |
| HRH1    | 0.0175086         | -0.618486           | -1.61685             | 1 down vs 2          | 10.55         | 216.282        | 123.004   | 1        | -2.54316               | 3.77231                | 4.40518                | -6.68603               | 2.15206                | 15.7449                | 7.10513                |                        |
| 13377   | 0.203983          | -0.513325           | -1.94808             | 1 down vs 2          | 2.03116       | 278.612        | 823.015   | 1        | -13.1236               | 10.1192                | 2.35175                | 3.29472                | -2.57566               | 13.9051                | 24.43                  | -10.5309               |
| 13663   | 0.0503527         | -0.401615           | -2.48994             | 1 down vs 2          | 5.96208       | 176.26         | 177.381   | 1        | -2.28949               | 2.85595                | 2.47367                | -3.32711               | -2.71788               | 1.7153                 | 16.9004                | 10.642                 |
| 13704   | 0.283781          | 0.121041            | -8.26164             | 1 down vs 2          | 1.38525       | 25.0217        | 108.378   | 1        | -2.12523               | 7.13832                | 4.54984                | 6.09234                | -2.45792               | -2.45633               | 4.46066                | 7.08816                |
| 13744   | 0.359237          | 0.0150588           | -66.4065             | 1 down vs 2          | 0.985232      | 801.14         | 4878.89   | 1        | -2.09026               | 7.5108                 | -2.48083               | 6.43644                | -3.39808               | 10.1112                | 7.29334                | 82.4988                |
| 13853   | 0.016121          | -0.294562           | -3.39487             | 1 down vs 2          | 10.9837       | 264.221        | 144.334   | 1        | -3.38756               | 11.2415                | 3.13277                | -2.34338               | -2.37228               | 4.8943                 | 18.3228                | 8.25763                |
| 13860   | 0.895728          | 0.808202            | -1.23731             | 1 down vs 2          | 0.018691      | 0.448544       | 143.987   | 1        | -5.95                  | -3.04755               | -9.70693               | 2.13795                | -2.37096               | -1.75014               | 5.09231                | -3.33823               |
| 14134   | 0.378878          | -0.190055           | -5.26162             | 1 down vs 2          | 0.902152      | 1283.93        | 8539.11   | 1        | -2.78087               | 5.25536                | -4.07378               | -4.57853               | -5.17791               | 1.70552                | 104.4                  | 2.6572                 |
| 14135   | 0.187761          | -0.306644           | -3.26111             | 1 down vs 2          | 2.20898       | 1807.96        | 4910.75   | 1        | -2.47261               | 85.0618                | 9.10621                | -3.22257               | -16.1669               | 1.90569                | 15.5702                | 7.18067                |
| 14167   | 0.454901          | 0.0356124           | -28.0801             | 1 down vs 2          | 0.637944      | 21.3516        | 200.816   | 1        | -2.15117               | 3.68601                | 2.37898                | 6.30083                | -3.77582               | -4.65834               | 3.97501                | 12.1141                |
| 14217   | 0.103663          | -0.530078           | -1.88652             | 1 down vs 2          | 3.6758        | 96.0334        | 156.755   | 1        | -4.91323               | 7.94978                | 2.02337                | 2.26264                | -4.78744               | -1.34802               | 2.16807                | 12.5934                |
| 14248   | 0.165145          | -0.320571           | -3.11944             | 1 down vs 2          | 2.49701       | 199.687        | 479.822   | 1        | -8.74033               | 3.39572                | 2.5451                 | 5.09223                | -3.86739               | 22.2617                | 12.9865                | -2.11553               |
| 14286   | 0.536971          | 0.133499            | -7.49071             | 1 down vs 2          | 0.428555      | 73492.2        | 1.03E+06  | 1        | -15.964                | -13.8868               | 7.64863                | -3.41673               | -72.1252               | -1134.43               | 5.75093                | -7.48956               |
| 14307   | 0.70928           | 0.372027            | -2.68798             | 1 down vs 2          | 0.152907      | 412.861        | 16200.4   | 1        | -2.34924               | 13.7447                | -4.78031               | -2.82964               | -21.1939               | 2.35123                | 6.55428                | -136.019               |
| 14479   | 0.0411544         | -0.376472           | -2.65624             | 1 down vs 2          | 6.71348       | 93.1099        | 83.2145   | 1        | -4.08372               | 7.27932                | 2.26692                | 2.08368                | -3.78204               | 2.35581                | 10.8865                | 2.80908                |
| 14525   | 0.517952          | -0.253717           | -3.94141             | 1 down vs 2          | 0.471474      | 103.342        | 1315.14   | 1        | 4.59355                | 2.43323                | -3.95988               | 4.03281                | -4.11914               | -37.0724               | 6.30088                | 2.6902                 |
| 14735   | 0.361434          | -0.95108            | -1.05144             | 1 down vs 2          | 0.975581      | 951.638        | 5852.75   | 1        | -30.2814               | 2.2462                 | 2.31668                | 61.0349                | 2.19218                | -40.7226               | -23.6847               | 2.11061                |
| 14926   | 0.404989          | -0.108488           | -9.21758             | 1 down vs 2          | 0.802         | 5469.7         | 40920.4   | 1        | -5.61798               | 229.625                | 3.53689                | -3.39494               | -6.8453                | 1.19148                | 5.0372                 | 4.23345                |
| 15135   | 0.400459          | -0.161944           | -6.17498             | 1 down vs 2          | 0.818597      | 9559.18        | 70065     | 1        | -7.95969               | 297.799                | 3.8546                 | -15.9789               | -5.91593               | -8.34859               | 10.3735                | 3.5733                 |
| 15257   | 0.486073          | -0.103617           | -9.65095             | 1 down vs 2          | 0.550653      | 4000.09        | 43585.6   | 1        | -12.8675               | 5.26543                | -17.642                | 2.06093                | -2.20313               | 227.39                 | 6.16602                | -11.9196               |
| 15283   | 0.546745          | 0.156097            | -6.40629             | 1 down vs 2          | 0.407653      | 365.097        | 5373.64   | 1        | 10.0013                | 2.17802                | -12.3615               | 2.93436                | -5.19238               | 1.13318                | 12.2523                | 79.4742                |
| 15300   | 0.169743          | -0.615528           | -1.62462             | 1 down vs 2          | 2.43408       | 46.9515        | 115.736   | 1        | 4.04628                | 7.88368                | 2.26357                | -7.22481               | -2.54124               | -1.76964               | 2.15811                | 4.95172                |
| 15347   | 0.613811          | -0.289475           | -3.45453             | 1 down vs 2          | 0.283071      | 78.0488        | 1654.33   | 1        | -14.6958               | 4.70704                | 33.064                 | 6.36464                | 3.98604                | -13.871                | 10.6834                | -9.56618               |
| 15398   | 0.0400911         | -0.56139            | -1.78129             | 1 down vs 2          | 6.81495       | 3016.2         | 2655.52   | 1        | -21.3837               | 20.745                 | 11.5482                | -2.39776               | -19.4803               | 37.3648                | 61.3952                | -2.61682               |
| 15399   | 0.579306          | 0.388483            | -2.57412             | 1 down vs 2          | 0.343265      | 29.9516        | 523.53    | 1        | 3.99309                | 9.38826                | -7.88523               | 7.39604                | -3.77196               | 1.61151                | 8.39342                | 21.1712                |
| 15404   | 0.380674          | -0.146346           | -6.83313             | 1 down vs 2          | 0.894903      | 1547.83        | 10377.6   | 1        | -3.99187               | 2.30638                | 114.975                | -4.62149               | -2.39055               | 1.27766                | 14.932                 | -8.1724                |
| 15550   | 0.367935          | -0.446711           | -2.23858             | 1 down vs 2          | 0.947561      | 232.209        | 1470.36   | 1        | -2.27601               | 41.6836                | -2.05131               | -5.51126               | -2.52146               | -1.38876               | 2.94167                | -2.7236                |
| 15653   | 0.357714          | -0.156847           | -6.37566             | 1 down vs 2          | 0.991984      | 6634.19        | 40126.8   | 1        | -15.1908               | 7.06256                | 12.2631                | -6.13128               | -2.87226               | 4.8298                 | 230.291                | 2.64496                |
| 15707   | 0.380311          | 0.02014             | -49.6524             | 1 down vs 2          | 0.896364      | 7785.76        | 52115.6   | 1        | -11.8968               | 53.6481                | 2.05214                | 6.52648                | 9.34376                | 1.10711                | 265.611                | 6.39983                |
| 15727   | 0.241073          | -0.545486           | -1.83323             | 1 down vs 2          | 1.69188       | 368.68         | 1307.47   | 1        | -4.34054               | -5.247                 | 34.3054                | 2.51628                | -13.0236               | -1.13235               | 19.6752                | -2.23537               |
| 15748   | 0.64606           | 0.304639            | -3.28257             | 1 down vs 2          | 0.233511      | 696.808        | 17904.3   | 1        | 9.62644                | -3.12608               | 8.21234                | -6.60887               | -28.3544               | -144.642               | 3.77973                | -2.84072               |
| 15963   | 0.61667           | 0.151401            | -6.60497             | 1 down vs 2          | 0.278426      | 35.413         | 763.14    | 1        | -7.10469               | 26.6405                | -2.25164               | 6.90516                | 2.52563                | -4.07436               | 7.44988                | -2.15801               |
| 15986   | 0.768541          | 0.501743            | -1.99305             | 1 down vs 2          | 0.0948248     | 4.84328        | 366.456   | 1        | -2.05225               | -2.79811               | 9.30675                | 2.38489                | -5.18797               | -1.58633               | -8.18001               | -12.8705               |
| 16053   | 0.199968          | -0.189908           | -5.26572             | 1 down vs 2          | 2.07324       | 505.084        | 1461.72   | 1        | 2.85225                | 2.15163                | 10.58                  | 7.2254                 | -17.936                | 1.6567                 | 42.1693                | 12.4088                |
| 16082   | 0.350354          | 0.0691305           | -14.4654             | 1 down vs 2          | 1.02525       | 196.232        | 1148.4    | 1        | 2.56195                | 41.0401                | 4.5287                 | 2.3454                 | -2.62813               | 2.4007                 | 3.7411                 | 3.23907                |
| 16098   | 0.217904          | -0.48533            | -2.06045             | 1 down vs 2          | 1.89403       | 384.534        | 1218.15   | 1        | -13.2331               | 3.45749                | 36.3639                | 2.02076                | -2.82557               | -1.00812               | 14.2368                | -4.84265               |
| 16146   | 0.131268          | -0.359384           | -2.78254             | 1 down vs 2          | 3.05136       | 83.8           | 164.779   | 1        | 3.28326                | -13.8708               | -2.24025               | -4.33185               | 6.35083                | -1.25258               | -3.38069               | -3.84515               |
| 16149   | 0.268738          | -0.165647           | -6.03694             | 1 down vs 2          | 1.48494       | 774.135        | 3127.95   | 1        | -4.27989               | 9.2973                 | 3.52367                | -13.9626               | 9.57996                | 64.9744                | 5.8809                 | 3.48242                |
| 16274   | 0.468155          | -0.0057249          | -174.677             | 1 down vs 2          | 0.599547      | 681.85         | 6823.65   | 1        | -2.32274               | -30.548                | 45.8885                | 4.34171                | -2.34462               | 2.60349                | 74.4308                | 2.43092                |
| 16281   | 0.256807          | -0.178246           | -5.61021             | 1 down vs 2          | 1.57013       | 374.308        | 1430.35   | 1        | -6.61489               | 2.12347                | 5.82963                | -2.39507               | 2.59757                | -1.98352               | 9.57291                | 44.4156                |
| 16305   | 0.260932          | 0.116129            | -8.61114             | 1 down vs 2          | 1.54002       | 69.9958        | 272.707   | 1        | 2.50123                | 5.73863                | 19.3716                | -3.6934                | 3.60045                | -1.41502               | 3.04107                | 7.82711                |
| 16364   | 0.208213          | -0.111812           | -8.94358             | 1 down vs 2          | 1.98809       | 463.779        | 1399.67   | 1        | -3.96936               | 7.87167                | 3.98887                | 2.81673                | -3.59234               | 6.52132                | 47.1566                | 5.18993                |
| 16536   | 0.985815          | 0.951296            | -1.0512              | 1 down vs 2          | 0.00034346    | 0.0141875      | 247.846   | 1        | -2.01679               | -5.57448               | 12.9585                | 2.1618                 | 4.95206                | 2.24564                | -4.52749               | 3.82788                |
| 16549   | 0.447169          | 0.0533699           | -18.7372             | 1 down vs 2          | 0.661278      | 1209.72        | 10976.2   | 1        | 2.42935                | 119.989                | -2.11914               | 4.80723                | -2.94044               | 2.85034                | 11.4262                | 2.01609                |
| 16570   | 0.00099654        | -0.857175           | -1.16662             | 1 down vs 2          | 35.5545       | 85.633         | 14.451    | 1        | -3.05392               | 2.53453                | 2.87051                | -2.84767               | -3.45587               | 1.68721                | 4.73626                | 6.36586                |
| 16583   | 0.0735202         | -0.871535           | -1.1474              | 1 down vs 2          | 4.68925       | 185.255        | 237.038   | 1        | -11.2995               | 7.6229                 | 6.45677                | -8.23644               | 5.64945                | -2.29106               | 8.03262                | 6.73439                |
| 16611   | 0.0086695         | -0.572451           | -1.74687             | 1 down vs 2          | 14.6611       | 118.929        | 48.6712   | 1        | -2.8658                | 3.34962                | 2.94423                | -2.84755               | -2.98476               | 1.55714                | 7.74826                | 9.72493                |
| IBSP    | 0.104391          | -0.461732           | -2.16576             | 1 down vs 2          | 3.65645       | 471.892        | 774.345   | 1        | -4.18196               | 2.98777                | 17.6722                | -7.58495               | -3.26674               | -4.0912                | 6.51041                | 31.1862                |
| IDH1    | 0.0114068         | -0.614774           | -1.62661             | 1 down vs 2          | 12.9388       | 115.615        | 53.6132   | 1        | -3.69535               | 10.2234                | 2.59724                | -3.00257               | -2.27081               | 1.43663                | 6.89083                | 3.16635                |

| Gene ID  | p-value (1 vs. 2) | MeanRatio (1 vs. 2) | FoldChange (1 vs. 2) | FoldChange (1 vs. 2) | F(Gene Group) | SS(Gene Group) | SS(Error) | F(Error) | FoldChange (106 vs. n) | FoldChange (111 vs. n) | FoldChange (112 vs. n) | FoldChange (121 vs. n) | FoldChange (347 vs. n) | FoldChange (353 vs. n) | FoldChange (537 vs. n) | FoldChange (563 vs. n) |
|----------|-------------------|---------------------|----------------------|----------------------|---------------|----------------|-----------|----------|------------------------|------------------------|------------------------|------------------------|------------------------|------------------------|------------------------|------------------------|
| IER3     | 0.0827506         | -0.701591           | -1.42533             | 1 down vs 2          | 4.32583       | 124.242        | 172.326   | 1        | -2.01458               | 2.4849                 | 4.19611                | -4.43898               | -3.61538               | -1.48562               | 2.942                  | 15.7819                |
| IER3IP1  | 0.0160366         | -0.89285            | -1.12001             | 1 down vs 2          | 11.0117       | 267.551        | 145.782   | 1        | -10.2556               | 15.3753                | 2.62036                | -3.1225                | -3.52577               | 2.18395                | 5.48981                | 5.88474                |
| IGDCC4   | 0.127214          | -0.532364           | -1.87841             | 1 down vs 2          | 3.1311        | 692.633        | 1327.27   | 1        | -14.0574               | 4.15401                | 2.25825                | -3.37325               | -2.60112               | 2.49815                | 10.2297                | 43.5731                |
| IGFL4    | 0.432791          | 0.448493            | -2.22969             | 1 down vs 2          | 0.706598      | 24.7726        | 210.354   | 1        | -9.50936               | -2.51489               | -5.39705               | 4.06571                | -3.42405               | -1.29949               | -14.707                | -0.03528               |
| IGJ      | 0.107714          | -0.580709           | -1.72203             | 1 down vs 2          | 3.57053       | 240.186        | 403.614   | 1        | -6.48762               | 21.1188                | 3.90278                | 5.22635                | -11.2126               | 1.02837                | 6.72744                | 3.02329                |
| IGLL3    | 0.0394785         | -0.638508           | -1.56615             | 1 down vs 2          | 6.87506       | 34.5283        | 30.1335   | 1        | -3.67281               | 2.89822                | 3.54409                | 2.53423                | -3.87821               | 1.05741                | 3.05688                | 2.53849                |
| IGSF1    | 0.682013          | 0.234937            | -4.25647             | 1 down vs 2          | 0.185146      | 3.33233        | 107.99    | 1        | 4.75985                | -5.79138               | -3.21092               | -2.16349               | -3.8245                | -2.70564               | -2.11161               | 5.10699                |
| IIP45    | 0.757224          | 0.770737            | -1.29746             | 1 down vs 2          | 0.104716      | 5.73585        | 328.653   | 1        | -2.0966                | 2.45416                | 8.72843                | 17.226                 | 2.51031                | 5.22088                | 16.7925                | 4.94872                |
| IKBIP    | 0.354946          | -0.0963479          | -10.3791             | 1 down vs 2          | 1.00436       | 1165.31        | 6961.47   | 1        | -6.384                 | 97.0623                | 7.30401                | -2.32776               | 2.1392                 | 1.75283                | 5.23999                | 2.33581                |
| IL1RAPL2 | 0.397295          | -0.16644            | -6.00816             | 1 down vs 2          | 0.830377      | 2035.18        | 14705.5   | 1        | -7.39828               | 2.04102                | 3.7107                 | -3.80627               | -2.89866               | -3.1586                | 136.568                | 2.06285                |
| IMMP2L   | 0.000864448       | -0.410842           | -2.43403             | 1 down vs 2          | 37.5312       | 134.676        | 21.5302   | 1        | -2.78655               | 6.68775                | 5.14246                | -2.30648               | -2.31089               | 3.68585                | 4.84721                | 9.67228                |
| INPP5E   | 0.012248          | -0.852785           | -1.17263             | 1 down vs 2          | 12.5177       | 177.838        | 85.2418   | 1        | -4.05101               | 8.70298                | 2.48737                | -3.33108               | -6.06559               | 1.37607                | 11.4125                | 2.30298                |
| INSR     | 0.0203869         | -0.978539           | -1.02193             | 1 down vs 2          | 9.78185       | 731.227        | 448.52    | 1        | -3.25682               | 13.2978                | 2.31009                | -21.0112               | -5.03282               | 3.10746                | 21.8067                | 9.38373                |
| IQGAP3   | 0.475118          | 0.116897            | -8.55456             | 1 down vs 2          | 0.580147      | 963.62         | 9965.95   | 1        | 2.5567                 | 5.41065                | 4.71152                | 9.37299                | -2.92717               | 1.32591                | 114.57                 | 2.33629                |
| IRF7     | 0.470197          | -0.0155018          | -64.5085             | 1 down vs 2          | 0.593805      | 28937.4        | 292393    | 1        | -2.75772               | -2.3259                | 605.8                  | 4.29195                | -7.22345               | -1.2139                | 12.0861                | -2.6749                |
| ISM2     | 0.152253          | 0.052248            | -11.7854             | 1 down vs 2          | 2.68746       | 76.6679        | 171.168   | 1        | -7.0418                | 4.70409                | 7.76009                | 3.06948                | 2.4719                 | -1.45751               | 12.8077                | 5.6573                 |
| ITGA3    | 0.259858          | -0.409241           | -2.44355             | 1 down vs 2          | 1.54779       | 546.83         | 2119.78   | 1        | -7.78769               | 2.48958                | 3.16523                | -4.72361               | -2.36655               | -1.30388               | 53.0185                | 3.22186                |
| ITGB1    | 0.0129183         | -0.978172           | -1.02231             | 1 down vs 2          | 12.2089       | 85.6647        | 42.0993   | 1        | -4.73973               | 3.49395                | 3.84563                | -2.6174                | -2.66991               | -1.23273               | 7.58339                | 3.39441                |
| ITGB1    | 0.0125926         | -0.698609           | -1.43141             | 1 down vs 2          | 12.3562       | 97.0087        | 47.1062   | 1        | -3.4805                | 4.23192                | 3.57705                | -2.79436               | -2.60011               | -1.08556               | 7.05209                | 7.39744                |
| ITIH1    | 0.275638          | -0.0154001          | -64.9346             | 1 down vs 2          | 1.4382        | 118.81         | 4955.42   | 1        | 2.79166                | 3.12257                | 28.2783                | 2.05506                | -5.99192               | 1.30727                | 6.84189                | 84.3929                |
| ITK      | 0.363068          | -0.114354           | -8.74475             | 1 down vs 2          | 0.968464      | 9701.73        | 60105.9   | 1        | -2.95578               | 2.66189                | 281.337                | -14.7127               | -4.47646               | -4.59918               | 2.44741                | 40.9061                |
| JPH2     | 0.899122          | 0.82813             | -1.20754             | 1 down vs 2          | 0.0174858     | 10.28          | 3527.42   | 1        | 2.73195                | 60.0196                | 5.89539                | 33.4685                | -2.35382               | -5.57692               | 2.20362                | 5.57689                |
| KANK1    | 0.935463          | 0.822461            | -1.21586             | 1 down vs 2          | 0.00712808    | 5.87553        | 4945.68   | 1        | -7.11327               | 2.25181                | -72.6574               | -7.5505                | -9.93797               | 9.77454                | 4.9693                 | 5.80784                |
| KCNA10   | 0.616929          | 0.454444            | -2.20049             | 1 down vs 2          | 0.278006      | 19.4252        | 419.238   | 1        | 4.39788                | 2.40419                | 18.6594                | 7.20721                | -3.56161               | -1.53851               | -2.91264               | 12.8869                |
| KCNC2    | 0.189229          | -0.896296           | -1.1157              | 1 down vs 2          | 2.19199       | 4459.76        | 12207.4   | 1        | -6.93048               | 2.21029                | 14.5915                | -58.9783               | -3.24595               | 5.24102                | 115.122                | -8.57128               |
| KCNH4    | 0.32757           | -0.847208           | -1.18035             | 1 down vs 2          | 1.13563       | 39873.1        | 210665    | 1        | -163.375               | 2.2174                 | -16.6308               | -9.77241               | -27.5005               | -1.70776               | 472.838                | -61.9928               |
| KCNH5    | 0.511248          | -0.0417715          | -23.9397             | 1 down vs 2          | 0.487347      | 50404          | 620552    | 1        | -9.69873               | 12.748                 | -84.0738               | -4.21846               | -5.80527               | 2.09074                | 858.57                 | -2.41732               |
| KCNH7    | 0.411547          | -0.971668           | -1.02916             | 1 down vs 2          | 0.778514      | 325.997        | 2512.46   | 1        | -40.5836               | 4.52842                | -4.17522               | 12.5491                | 8.54002                | 18.4653                | 23.114                 | -8.49432               |
| KCNIP3   | 0.800972          | 0.603274            | -1.65762             | 1 down vs 2          | 0.0694388     | 6.94095        | 599.747   | 1        | -5.19763               | -25.0026               | -4.26025               | 2.28624                | -5.86578               | 2.93507                | 4.38028                | -2.3012                |
| KCNQ2    | 0.049061          | -0.322288           | -3.10281             | 1 down vs 2          | 6.05592       | 158.27         | 156.809   | 1        | -7.14949               | 7.02079                | 2.38429                | 3.15303                | -2.72152               | 5.47935                | 15.5245                | 4.3321                 |
| KCTD9    | 0.00474539        | -0.662378           | -1.50971             | 1 down vs 2          | 19.052        | 172.08         | 54.1926   | 1        | -4.23412               | 4.8989                 | 3.3598                 | -2.28187               | -4.93549               | 1.66724                | 9.36295                | 9.52519                |
| KIAA1843 | 0.178443          | -0.153009           | -6.53555             | 1 down vs 2          | 2.32136       | 1501.08        | 3879.82   | 1        | -10.8345               | 33.1486                | 17.9251                | 2.2074                 | -2.63727               | 4.29778                | 73.0259                | -5.69922               |
| KIF20A   | 0.0840651         | -0.203567           | -4.91239             | 1 down vs 2          | 4.27857       | 9413.46        | 13200.8   | 1        | -48.9276               | 58.7927                | 7.88708                | 9.24168                | 3.73315                | 112.712                | 110.569                | 4.39577                |
| KIF27    | 0.204352          | 0.0253955           | -39.377              | 1 down vs 2          | 2.02735       | 459.493        | 1359.88   | 1        | -8.31245               | 34.5819                | 4.60503                | 4.53625                | 4.99994                | 2.24564                | 36.1392                | 2.74021                |
| KIF4A    | 0.444122          | 0.0197535           | -50.6239             | 1 down vs 2          | 0.670668      | 3.00E+06       | 2.69E+07  | 1        | -14.6153               | 530.392                | 27.6382                | 84.1214                | 7.00015                | 11.095                 | 5908.46                | -22.5165               |
| KITLG    | 0.319179          | -0.331138           | -3.01989             | 1 down vs 2          | 1.17936       | 2293.57        | 11668.6   | 1        | -17.2169               | 13.1276                | 3.65181                | -2.27981               | -6.60466               | 2.79277                | 121.318                | -9.51826               |
| KLF11    | 0.027206          | -0.410109           | -2.43837             | 1 down vs 2          | 8.43097       | 92.9617        | 66.1573   | 1        | -4.21526               | 5.16567                | 7.3968                 | 2.21865                | -4.14694               | 1.21429                | 8.59839                | 2.59198                |
| KLF11    | 0.028284          | -0.254361           | -3.93142             | 1 down vs 2          | 8.25906       | 113.861        | 82.7172   | 1        | -3.39715               | 6.5839                 | 8.39574                | 2.34552                | -3.689                 | 1.14269                | 11.0608                | 3.87923                |
| KLHDC8A  | 0.050563          | -0.499621           | -2.00152             | 1 down vs 2          | 5.94711       | 2321.36        | 2342      | 1        | -25.7904               | 12.4995                | 2.70815                | -6.55461               | -2.82323               | 6.35174                | 48.927                 | 46.8301                |
| KLHL29   | 0.253434          | -0.774944           | -1.29042             | 1 down vs 2          | 1.5953        | 2189.79        | 8235.92   | 1        | -22.4491               | 2.16039                | 4.03121                | -16.5357               | -5.777                 | 5.26084                | 98.5378                | -13.7214               |
| KLKBL4   | 0.838427          | 0.61549             | -1.62472             | 1 down vs 2          | 0.0453422     | 9.0876         | 1202.54   | 1        | 2.28904                | 4.91766                | -2.65599               | 18.2038                | -9.92079               | -1.6132                | -2.49375               | 30.473                 |
| KNG1     | 0.540202          | -0.177976           | -5.61873             | 1 down vs 2          | 0.42156       | 401.35         | 5712.35   | 1        | -2.40782               | -13.3872               | -2.12407               | -2.18523               | -2.03838               | 5.44307                | 78.8982                | -6.72959               |
| KRT1     | 0.4615            | -0.144766           | -6.90772             | 1 down vs 2          | 0.61858       | 559.696        | 5428.85   | 1        | 4.89046                | -2.45639               | -2.29847               | -7.50682               | -3.93823               | -3.3222                | 3.20439                | 80.3348                |
| KRT8P9   | 0.264132          | 0.280144            | -3.5696              | 1 down vs 2          | 1.51715       | 172.76         | 683.228   | 1        | 10.4432                | 13.0701                | 3.55774                | -4.51864               | 5.28211                | 33.6057                | 6.12105                | 10.3176                |
| KRTAP4-7 | 0.290371          | -0.185368           | -5.39466             | 1 down vs 2          | 1.34404       | 1083           | 4834.67   | 1        | 4.84333                | -78.61                 | -25.0677               | -2.38102               | 8.8127                 | 2.47526                | 2.31776                | -2.49008               |
| KRTCAP3  | 0.401874          | 0.28832             | -3.46837             | 1 down vs 2          | 0.813382      | 42.5852        | 314.135   | 1        | -2.80736               | 2.79105                | 2.33175                | -3.75999               | 12.3595                | 15.7833                | 10.3706                | 2.2055                 |
| LAMB1    | 0.286138          | -0.0809833          | -12.3482             | 1 down vs 2          | 1.37034       | 5171.41        | 22642.8   | 1        | -4.47936               | 5.81863                | 15.62                  | -4.68382               | -2.64007               | 1.7258                 | 39.1089                | 180.642                |
| LAMB1    | 0.122813          | -0.476878           | -2.09697             | 1 down vs 2          | 3.22174       | 1749.19        | 3257.6    | 1        | -22.1578               | 19.72                  | 8.21724                | -4.60533               | -2.82393               | 2.7263                 | 68.451                 | 4.29094                |
| LAMC1    | 0.0125462         | -0.23789            | -4.20362             | 1 down vs 2          | 12.3776       | 372.899        | 180.761   | 1        | -3.34895               | 13.2005                | 3.33275                | -2.2463                | -2.53513               | 5.44565                | 18.5212                | 16.4616                |
| LAX1     | 0.222262          | -0.50574            | -1.9773              | 1 down vs 2          | 1.85368       | 1040.5         | 3367.88   | 1        | 3.95344                | 51.8906                | -3.20956               | 2.02749                | -29.7175               | -7.88629               | 4.37909                | 33.0501                |
| LEFTY2   | 0.391676          | 0.0318909           | -31.3569             | 1 down vs 2          | 0.851687      | 40010.5        | 281868    | 1        | -4.91491               | 39.1021                | 74.3143                | 21.6002                | -2.24919               | 3.22582                | 622.894                | 14.9168                |
| LGALS2   | 0.032542          | -0.643625           | -1.5537              | 1 down vs 2          | 7.65749       | 1101.47        | 863.055   | 1        | -4.93127               | 24.7701                | 8.24286                | 2.56619                | -26.1082               | 11.2503                | 26.2616                | 3.20674                |

| Gene ID              | p-value (1 vs. 2) | MeanRatio (1 vs. 2) | FoldChange (1 vs. 2) | FoldChange (1 vs. 2) | F(Gene Group) | SS(Gene Group) | SS(Error) | F(Error) | FoldChange (106 vs. n) | FoldChange (111 vs. n) | FoldChange (112 vs. n) | FoldChange (121 vs. n) | FoldChange (347 vs. n) | FoldChange (353 vs. n) | FoldChange (537 vs. n) | FoldChange (563 vs. n) |
|----------------------|-------------------|---------------------|----------------------|----------------------|---------------|----------------|-----------|----------|------------------------|------------------------|------------------------|------------------------|------------------------|------------------------|------------------------|------------------------|
| LGALS8               | 0.00211233        | -0.98831            | -1.01183             | 1 down vs 2          | 26.5371       | 118.941        | 26.8924   | 1        | -6.62176               | 3.08775                | 4.01831                | -2.12368               | -3.13125               | 1.21339                | 5.48582                | 6.22335                |
| LGALS9C              | 0.850531          | -0.103311           | -9.67953             | 1 down vs 2          | 0.038704      | 1.55695        | 241.363   | 1        | 2.15757                | -3.1502                | -4.69577               | 2.46744                | -4.36903               | -6.04601               | 11.9091                | -2.14673               |
| LIMS1                | 0.0364888         | -0.640978           | -1.56012             | 1 down vs 2          | 7.18762       | 156.25         | 130.433   | 1        | -2.96575               | 3.87651                | 2.61048                | -3.50548               | -4.226                 | 1.39477                | 4.40261                | 15.5305                |
| LOC100009670.0329939 | 0.0329939         | -0.65524            | -1.52616             | 1 down vs 2          | 7.59988       | 119.861        | 94.6286   | 1        | -3.34688               | 10.8958                | 2.23097                | -3.06611               | -3.0821                | -1.20881               | 8.48865                | 3.74507                |
| LOC100128170.349359  | 0.349359          | -0.412296           | -2.42544             | 1 down vs 2          | 1.02983       | 154.384        | 899.477   | 1        | -9.08939               | -2.77658               | 31.338                 | 4.52462                | -3.38228               | 2.45872                | 3.37826                | -2.27323               |
| LOC100128200.431529  | 0.431529          | -0.184269           | -5.42686             | 1 down vs 2          | 0.710698      | 2783.53        | 23499.7   | 1        | -10.6675               | 6.72393                | 169.243                | -4.95659               | -2.36131               | -6.74515               | -2.64125               | -3.90686               |
| LOC100128510.376745  | 0.376745          | -0.114086           | -8.76531             | 1 down vs 2          | 0.910835      | 2398.38        | 15799     | 1        | -2.96334               | 144.358                | 4.7606                 | -3.06692               | -4.9571                | -1.36535               | 4.93783                | 7.82157                |
| LOC100128820.771033  | 0.771033          | 0.531755            | -1.88056             | 1 down vs 2          | 0.0927195     | 15.7742        | 1020.77   | 1        | -14.5338               | 4.83904                | 2.75649                | 27.409                 | -2.99345               | 1.43848                | 11.0256                | 10.9125                |
| LOC100128890.167819  | 0.167819          | -0.505249           | -1.97922             | 1 down vs 2          | 2.4601        | 2244.19        | 5473.4    | 1        | -2.69365               | 15.9412                | 7.39269                | -28.6249               | -3.51898               | 3.58104                | 85.7527                | 2.25104                |
| LOC100128890.0124295 | 0.0124295         | -0.400511           | -2.49681             | 1 down vs 2          | 12.4319       | 338.878        | 163.553   | 1        | -2.11246               | 16.7684                | 15.3251                | -4.16616               | -5.25512               | 2.20942                | 8.34858                | 5.34444                |
| LOC100129340.259642  | 0.259642          | -0.674819           | -1.48188             | 1 down vs 2          | 1.54936       | 153.026        | 592.603   | 1        | -4.66848               | 3.3517                 | 3.48564                | -3.51457               | -2.73696               | -3.20101               | 26.3354                | -3.00152               |
| LOC100129530.025746  | 0.025746          | -0.726212           | -1.37701             | 1 down vs 2          | 8.67897       | 82.5116        | 57.0425   | 1        | -3.93729               | 7.04197                | 2.35458                | 2.2032                 | -6.63826               | 2.15601                | 4.41844                | 3.24367                |
| LOC100129780.463752  | 0.463752          | -0.546348           | -1.83033             | 1 down vs 2          | 0.612083      | 36.0917        | 353.792   | 1        | -5.8826                | 15.0333                | -3.74261               | -3.5846                | 4.81684                | -2.57117               | -3.14177               | 8.60844                |
| LOC100130110.813516  | 0.813516          | 0.519256            | -1.92583             | 1 down vs 2          | 0.0607596     | 7.78321        | 768.591   | 1        | 2.46635                | -25.3836               | -3.55535               | -11.9667               | 2.89847                | 6.51819                | -2.12574               | 3.35631                |
| LOC100130180.245578  | 0.245578          | -0.47457            | -2.10717             | 1 down vs 2          | 1.65585       | 62.1467        | 225.189   | 1        | 2.03572                | 2.03012                | -2.65804               | -2.27169               | -5.32262               | 1.41343                | 15.9013                | 2.83467                |
| LOC100130200.121613  | 0.121613          | -0.769172           | -1.3001              | 1 down vs 2          | 3.24725       | 493.393        | 911.65    | 1        | -8.77261               | -4.75497               | 2.68429                | -2.64229               | -9.7429                | -1.35041               | 29.9779                | 19.2886                |
| LOC100130320.0863459 | 0.0863459         | -0.962436           | -1.03903             | 1 down vs 2          | 4.19894       | 109.915        | 157.061   | 1        | -2.71165               | 3.88629                | -2.64051               | -10.6912               | 2.138                  | 3.13413                | 6.35505                | 8.77258                |
| LOC100130320.329548  | 0.329548          | -0.0166088          | -60.2091             | 1 down vs 2          | 1.12557       | 81.2708        | 433.223   | 1        | -2.18088               | 20.7113                | -3.23635               | -5.31201               | 7.17021                | 1.60319                | 10.399                 | 2.9033                 |
| LOC100130340.753126  | 0.753126          | 0.348688            | -2.8679              | 1 down vs 2          | 0.108433      | 7.20906        | 398.904   | 1        | -3.20912               | 5.21185                | -7.4341                | 3.63542                | -3.57555               | 2.07516                | 2.87672                | -17.7825               |
| LOC100130400.505628  | 0.505628          | 0.0617915           | -16.1835             | 1 down vs 2          | 0.500963      | 212.297        | 2542.67   | 1        | 3.37179                | -2.81538               | 5.32966                | -2.09618               | -3.37804               | -55.5371               | 2.19663                | 46.6608                |
| LOC100130790.0137666 | 0.0137666         | -0.252267           | -3.96405             | 1 down vs 2          | 11.8476       | 164.744        | 83.4316   | 1        | -2.27747               | 6.38793                | 11.5729                | 2.95762                | -6.34501               | 9.20549                | 7.12603                | 3.13396                |
| LOC100130930.0364439 | 0.0364439         | -0.444188           | -2.2513              | 1 down vs 2          | 7.19258       | 209.347        | 174.636   | 1        | -2.07049               | 11.6462                | 2.08353                | -3.00761               | -4.67173               | 4.08611                | 16.6655                | 2.10162                |
| LOC100131060.229156  | 0.229156          | -0.710329           | -1.4078              | 1 down vs 2          | 1.79214       | 79.9524        | 267.677   | 1        | -2.45645               | 3.04626                | -2.3062                | -2.81597               | -2.86368               | -1.90165               | 2.47117                | 17.7804                |
| LOC100131050.885057  | 0.885057          | 0.585415            | -1.70819             | 1 down vs 2          | 0.0227482     | 2.86044        | 754.463   | 1        | 5.42273                | -16.0223               | 21.9317                | -2.55121               | 2.36071                | 2.82712                | 2.13035                | 4.02921                |
| LOC100131130.153913  | 0.153913          | -0.222737           | -4.4896              | 1 down vs 2          | 2.66168       | 22945.9        | 51725     | 1        | -93.8072               | 77.4153                | 4.96523                | 35.9614                | -2.60926               | 257.981                | 105.63                 | 6.37347                |
| LOC100131150.475471  | 0.475471          | -0.0085599          | -116.824             | 1 down vs 2          | 0.579178      | 178321         | 1.85E+06  | 1        | -2.34151               | 3.35127                | 6.29241                | -2.21919               | -3.29146               | 3.00394                | 1521.42                | -5.20224               |
| LOC100131240.39105   | 0.39105           | -0.0682824          | -14.6451             | 1 down vs 2          | 0.854091      | 2208.57        | 15515.2   | 1        | 2.00918                | -10.5561               | 2.11918                | 2.0916                 | 2.48033                | -11.8534               | -142.874               | 2.52976                |
| LOC100131260.229262  | 0.229262          | -0.211915           | -4.71887             | 1 down vs 2          | 1.79122       | 771.299        | 2583.6    | 1        | -4.93368               | 42.058                 | -4.95983               | -2.91163               | -2.7942                | -2.31962               | 46.6608                | 2.23813                |
| LOC100131470.0304335 | 0.0304335         | -0.457779           | -2.18446             | 1 down vs 2          | 7.94121       | 226.347        | 171.017   | 1        | -3.83346               | 4.06773                | 2.33683                | -2.61696               | -3.90033               | 2.82363                | 11.1352                | 17.3213                |
| LOC100131650.735665  | 0.735665          | -0.132422           | -7.55162             | 1 down vs 2          | 0.1251        | 722.069        | 34631.7   | 1        | -6.29587               | 7.51234                | -84.9158               | -3.25327               | 2.66481                | -1.14513               | 169.714                | -4.51903               |
| LOC100131720.451702  | 0.451702          | -0.025103           | -39.8358             | 1 down vs 2          | 0.647512      | 63960.8        | 592676    | 1        | -8.41175               | 36.9424                | 3.60768                | -2.98034               | -2.17655               | 1.23907                | 868.046                | -8.97223               |
| LOC100131870.349228  | 0.349228          | -0.776588           | -1.28768             | 1 down vs 2          | 1.03044       | 245.768        | 1431.05   | 1        | -3.61237               | -2.44098               | 5.23669                | -9.16099               | -2.24034               | -2.94497               | -6.68225               | 39.053                 |
| LOC100132210.665873  | 0.665873          | -0.829407           | -1.20568             | 1 down vs 2          | 0.206004      | 263.718        | 7680.96   | 1        | -3.62744               | 53.5181                | -62.0248               | -9.34063               | -3.16242               | 33.5419                | 2.29786                | 5.08063                |
| LOC100132350.155741  | 0.155741          | -0.339383           | -2.94653             | 1 down vs 2          | 2.63374       | 304.767        | 694.298   | 1        | -2.59374               | 2.81549                | 9.51268                | -4.1829                | -2.91483               | -2.26841               | 31.7661                | 5.76776                |
| LOC100132560.797127  | 0.797127          | -0.72599            | -1.37743             | 1 down vs 2          | 0.0722242     | 4.09753        | 340.401   | 1        | -5.69967               | 2.52435                | -4.06204               | 14.2973                | -6.73222               | -1.32241               | 3.61168                | -5.03403               |
| LOC100132760.281998  | 0.281998          | -0.0883506          | -11.3185             | 1 down vs 2          | 1.39664       | 132.048        | 567.281   | 1        | -8.57248               | 2.33451                | 4.5721                 | 2.3593                 | 4.16943                | 1.28771                | 27.0257                | 3.33375                |
| LOC100132810.883673  | 0.883673          | 0.450435            | -2.22008             | 1 down vs 2          | 0.0233041     | 5.71343        | 1471.01   | 1        | -2.53104               | -4.41747               | -21.4587               | 4.44909                | 2.37417                | -1.11987               | 28.3405                | 14.5373                |
| LOC100132900.445841  | 0.445841          | -0.0538063          | -18.5852             | 1 down vs 2          | 0.665354      | 3098.21        | 27938.9   | 1        | -4.205                 | 5.52053                | 10.219                 | 4.0545                 | -6.07606               | -2.13665               | 187.39                 | -8.12333               |
| LOC100132950.332656  | 0.332656          | -0.140469           | -7.11902             | 1 down vs 2          | 1.10997       | 339.166        | 1833.38   | 1        | -12.0431               | 2.56068                | 45.1012                | 14.5356                | -7.46212               | -1.38712               | 5.38028                | 7.30963                |
| LOC100133000.193338  | 0.193338          | -0.286188           | -3.49421             | 1 down vs 2          | 2.14544       | 1374.62        | 3844.3    | 1        | -4.03541               | 38.6417                | 66.7526                | -2.46857               | -11.5702               | -2.0842                | 6.3347                 | -4.38656               |
| LOC100133120.492474  | 0.492474          | -0.336072           | -2.97555             | 1 down vs 2          | 0.533982      | 71.5527        | 803.989   | 1        | -6.52534               | -3.24031               | 5.3353                 | -2.0169                | 3.88063                | 1.91084                | 27.3207                | -8.20841               |
| LOC100133350.405573  | 0.405573          | -0.391262           | -2.55583             | 1 down vs 2          | 0.799884      | 275.555        | 2066.97   | 1        | -4.8668                | -10.0239               | 48.0585                | -3.13513               | -2.22591               | 4.21831                | 3.32556                | -2.01076               |
| LOC100133690.299357  | 0.299357          | -0.173484           | -5.76423             | 1 down vs 2          | 1.29008       | 2198.67        | 10225.7   | 1        | -9.09067               | 118.913                | 5.32869                | -3.20909               | -2.88759               | 13.5052                | 10.1891                | -2.03036               |
| LOC100133820.888207  | 0.888207          | 0.562056            | -1.77918             | 1 down vs 2          | 0.0215079     | 0.300419       | 83.807    | 1        | 2.63258                | 4.29411                | -2.528                 | 2.42592                | -3.51735               | -3.95243               | 2.77356                | 2.98274                |
| LOC100133880.448545  | 0.448545          | 0.0817167           | -12.2374             | 1 down vs 2          | 0.657072      | 5767.95        | 52669.6   | 1        | -3.48183               | 264.05                 | 9.77484                | 7.93518                | 10.3536                | 30.9195                | -4.77301               | 2.02623                |
| LOC100133890.75166   | 0.75166           | 0.716999            | -1.3947              | 1 down vs 2          | 0.109781      | 7.4585         | 407.638   | 1        | -6.3643                | -10.6254               | -4.55413               | -6.18397               | -2.61095               | -21.5924               | 5.56123                | -4.02696               |
| LOC100133950.757568  | 0.757568          | -0.277862           | -3.5989              | 1 down vs 2          | 0.104407      | 1471.67        | 84573.2   | 1        | -8.32084               | 51.3032                | 78.3173                | 28.8988                | -2.30238               | 3.48149                | 33.4669                | -276.189               |
| LOC100134050.242536  | 0.242536          | -0.0277661          | -36.0151             | 1 down vs 2          | 1.68007       | 5121.1         | 18288.9   | 1        | -8.08142               | -20.9109               | -31.3418               | 5.28752                | 7.02958                | 1.24868                | -168.724               | -34.5194               |
| LOC100134240.204719  | 0.204719          | -0.407074           | -2.45656             | 1 down vs 2          | 2.02357       | 384.39         | 1139.74   | 1        | -14.3862               | 14.7033                | -3.12332               | -2.00962               | 3.96891                | -1.65416               | 34.8803                | 6.07288                |
| LOC283585            | 0.698281          | -0.683959           | -1.46208             | 1 down vs 2          | 0.165472      | 112.409        | 4075.93   | 1        | 7.59298                | -25.5328               | -23.8373               | -2.73323               | 4.57476                | -20.2213               | -3.25454               | 49.856                 |
| LOC284276            | 0.459477          | 0.265986            | -3.75986             | 1 down vs 2          | 0.624463      | 419.935        | 4034.85   | 1        | 6.05036                | 8.07412                | 6.58949                | -5.14959               | 15.3669                | 75.6715                | 5.69674                | 5.90829                |
| LOC285741            | 0.490121          | -0.0205865          | -48.5755             | 1 down vs 2          | 0.540064      | 1766.81        | 19628.9   | 1        | -2.00969               | 2.11347                | 3.99491                | -3.0307                | 6.89797                | -155.095               | 2.18519                | -3.58683               |

| Gene ID   | p-value (1 vs. 2) | MeanRatio (1 vs. 2) | FoldChange (1 vs. 2) | FoldChange (1 vs. 2) | F(Gene Group) | SS(Gene Group) | SS(Error) | F(Error) | FoldChange (106 vs. n) | FoldChange (111 vs. n) | FoldChange (112 vs. n) | FoldChange (121 vs. n) | FoldChange (347 vs. n) | FoldChange (353 vs. n) | FoldChange (537 vs. n) | FoldChange (563 vs. n) |
|-----------|-------------------|---------------------|----------------------|----------------------|---------------|----------------|-----------|----------|------------------------|------------------------|------------------------|------------------------|------------------------|------------------------|------------------------|------------------------|
| LOC339047 | 0.71315           | 0.260429            | -3.83982             | 1 down vs 2          | 0.148625      | 11.6371        | 469.791   | 1        | -11.7266               | -3.24603               | -3.34353               | -6.2458                | 15.3406                | -6.46403               | 2.91688                | -6.70601               |
| LOC374443 | 0.254607          | -0.289231           | -3.45745             | 1 down vs 2          | 1.58649       | 999.593        | 3780.39   | 1        | -5.13954               | 6.33384                | 3.96944                | -2.627                 | -7.77329               | 3.80032                | 72.7553                | 2.68795                |
| LOC387804 | 0.51521           | 0.27393             | -3.65056             | 1 down vs 2          | 0.477917      | 156.908        | 1969.89   | 1        | 4.58473                | 5.38481                | 11.5242                | 3.69696                | 2.07222                | -1.24232               | 50.8397                | -3.51038               |
| LOC387826 | 0.598282          | 0.293604            | -3.40595             | 1 down vs 2          | 0.309196      | 53.3902        | 1036.05   | 1        | -4.64809               | 5.39159                | 3.02784                | 15.456                 | -4.15419               | 2.39159                | 31.5215                | -4.5621                |
| LOC387870 | 0.864178          | -0.267675           | -3.73587             | 1 down vs 2          | 0.0318752     | 0.732813       | 137.94    | 1        | -7.71336               | -2.13884               | -2.04493               | 3.40045                | 4.70893                | 2.53657                | 3.49263                | -4.31123               |
| LOC388161 | 0.332706          | -0.117372           | -8.51993             | 1 down vs 2          | 1.10971       | 242.256        | 1309.83   | 1        | -2.07611               | 2.39483                | 39.7181                | 4.41058                | -5.91646               | -6.32741               | 11.7693                | 3.309                  |
| LOC389102 | 0.0603175         | -0.373246           | -2.6792              | 1 down vs 2          | 5.33338       | 319.378        | 359.297   | 1        | -5.71134               | 3.4133                 | 3.21629                | -2.67188               | -2.2587                | 1.46027                | 18.6359                | 20.7939                |
| LOC389607 | 0.25197           | 0.0417726           | -23.9391             | 1 down vs 2          | 1.60637       | 673.225        | 2514.58   | 1        | -3.04814               | 31.5526                | -3.16344               | 2.90143                | 2.62484                | 55.894                 | 17.5685                | -2.97793               |
| LOC391269 | 0.895405          | 0.748501            | -1.336               | 1 down vs 2          | 0.018808      | 17.5123        | 5586.65   | 1        | -14.1493               | 21.3956                | 2.89913                | 65.657                 | -24.2212               | 8.67878                | 30.4444                | -2.65978               |
| LOC391574 | 0.759149          | 0.0364082           | -27.4664             | 1 down vs 2          | 0.102995      | 235.984        | 13747.3   | 1        | -9.42035               | 107.604                | -3.09303               | 7.33924                | 3.35276                | 1.63957                | 3.7065                 | -51.6444               |
| LOC391763 | 0.183053          | -0.313396           | -3.19085             | 1 down vs 2          | 2.26473       | 136.129        | 360.65    | 1        | -4.55421               | 11.8777                | -2.69823               | 4.99647                | -6.54176               | -1.71144               | 16.4824                | 8.48724                |
| LOC399965 | 0.492879          | -0.0598749          | -16.7015             | 1 down vs 2          | 0.532942      | 1925.68        | 21679.8   | 1        | -2.28234               | 5.74805                | 5.3045                 | 2.67734                | 5.03628                | -161.709               | 2.19856                | -2.72646               |
| LOC400095 | 0.992997          | 0.992039            | -1.00803             | 1 down vs 2          | 8.37E-05      | 0.0040593      | 290.985   | 1        | 2.32514                | -7.62552               | -4.11161               | -9.18479               | -10.5344               | -3.85997               | -16.2761               | 2.65047                |
| LOC400464 | 0.109427          | -0.0621836          | -16.0814             | 1 down vs 2          | 3.52765       | 1037.74        | 1765.03   | 1        | -4.45897               | 31.5033                | 4.48971                | 2.7617                 | -2.43454               | 4.51649                | 16.5325                | 53.7003                |
| LOC400891 | 0.40876           | -0.123175           | -8.1185              | 1 down vs 2          | 0.788419      | 618.848        | 4709.53   | 1        | -2.3111                | 5.87642                | -2.48588               | 5.37173                | -9.03771               | -1.63382               | 76.5759                | 2.54225                |
| LOC401220 | 0.294385          | 0.294385            | -12.0985             | 1 down vs 2          | 1.31962       | 429.028        | 1950.68   | 1        | -12.2333               | 46.5598                | 14.0858                | -5.31701               | 5.52173                | 17.9811                | -4.14905               |                        |
| LOC401630 | 0.686985          | -0.520536           | -1.9211              | 1 down vs 2          | 0.178992      | 6.61031        | 221.584   | 1        | -4.29866               | -11.0591               | 4.95036                | 4.09721                | 2.1298                 | 1.12116                | -5.1691                | 3.98244                |
| LOC402269 | 0.536888          | -0.737488           | -1.35595             | 1 down vs 2          | 0.428735      | 151.891        | 2125.66   | 1        | -2.73516               | 2.77727                | 6.22998                | -5.38808               | -3.33768               | 42.8679                | -8.83724               | -17.1371               |
| LOC439936 | 0.142958          | -0.551405           | -1.81355             | 1 down vs 2          | 2.83942       | 200.291        | 423.236   | 1        | -2.20848               | 3.53227                | -2.33419               | -6.52353               | -2.28837               | 1.39824                | 6.94807                | 23.7656                |
| LOC439945 | 0.441348          | -0.0798096          | -12.5298             | 1 down vs 2          | 0.679314      | 2621.41        | 20857     | 1        | -2.69695               | 161.919                | 3.30971                | -2.01885               | -3.15311               | 1.58857                | 2.12309                | -4.61365               |
| LOC439957 | 0.335681          | -0.365574           | -2.73542             | 1 down vs 2          | 1.09499       | 6729.82        | 36876.2   | 1        | -15.3967               | 2.8026                 | -2.08859               | 2.23968                | -34.9582               | 213.857                | -2.55114               | 7.33924                |
| LOC440356 | 0.56101           | 0.201035            | -4.97425             | 1 down vs 2          | 0.378482      | 54.6723        | 866.71    | 1        | 3.18142                | -2.70345               | 5.92639                | -2.48502               | -4.77254               | -31.6904               | -3.24342               | -2.08203               |
| LOC440518 | 0.327504          | 0.0801547           | -12.4759             | 1 down vs 2          | 1.13597       | 77.7203        | 410.506   | 1        | -2.19386               | 6.10654                | -7.84387               | 6.37926                | -2.50233               | 14.4391                | 6.2075                 | 16.087                 |
| LOC441131 | 0.0249857         | -0.710867           | -1.40673             | 1 down vs 2          | 8.81572       | 119.213        | 81.1369   | 1        | -4.24492               | 12.2575                | 2.22028                | -2.39779               | -3.29658               | 1.20146                | 4.89748                | 2.72649                |
| LOC441395 | 0.528164          | 0.323853            | -3.08782             | 1 down vs 2          | 0.448052      | 103.145        | 1381.25   | 1        | -7.77001               | 7.0966                 | 37.9041                | 2.75296                | 15.6745                | -2.05031               | 14.4648                | -2.56811               |
| LOC497190 | 0.196205          | -0.340353           | -2.93812             | 1 down vs 2          | 2.11379       | 11266.9        | 31981.2   | 1        | -47.7882               | 22.6974                | 6.29658                | -5.42223               | -5.84151               | 5.49482                | 42.182                 | 212.499                |
| LOC504188 | 0.482632          | -0.0044166          | -226.419             | 1 down vs 2          | 0.559785      | 11538.7        | 123677    | 1        | 6.98887                | -3.11568               | -392.302               | 6.25347                | -12.2075               | -1.95931               | 2.41597                | 4.44882                |
| LOC51145  | 0.855892          | 0.336853            | -2.96866             | 1 down vs 2          | 0.0359389     | 1.47475        | 246.209   | 1        | 2.52204                | -3.55491               | -7.83157               | 3.76326                | -4.93382               | 3.91784                | 10.3478                | 3.80764                |
| LOC642073 | 0.334465          | 0.123528            | -8.09534             | 1 down vs 2          | 1.10098       | 3808.58        | 20755.5   | 1        | -2.5509                | 54.4692                | 172.985                | -3.87424               | 25.481                 | 2.5237                 | 4.58007                | 22.5482                |
| LOC642383 | 0.924707          | 0.544454            | -1.8367              | 1 down vs 2          | 0.00971172    | 10.421         | 6438.21   | 1        | -3.41812               | -4.72168               | 69.681                 | 2.72359                | 9.14741                | -2.66918               | 3.53327                | -39.9477               |
| LOC642439 | 0.481492          | -0.0072551          | -137.834             | 1 down vs 2          | 0.562836      | 8389.81        | 89437.8   | 1        | -3.30108               | -2.91562               | 2.3228                 | 4.80653                | -2.95089               | 1.01599                | 333.808                | -2.17932               |
| LOC642675 | 0.869176          | -0.0030546          | -327.377             | 1 down vs 2          | 0.0295457     | 0.999438       | 202.961   | 1        | -4.50616               | -2.95048               | 2.01801                | 6.64925                | -2.14976               | 8.13301                | -6.84053               | 3.27933                |
| LOC642716 | 0.878172          | 0.543045            | -1.84147             | 1 down vs 2          | 0.0255831     | 0.464211       | 108.871   | 1        | 2.20007                | 2.90931                | -6.22486               | -4.17954               | 3.75342                | 1.24855                | 4.86681                | 2.64464                |
| LOC642797 | 0.8855            | 0.102742            | -9.7331              | 1 down vs 2          | 0.0225716     | 0.981654       | 260.943   | 1        | -4.35349               | -2.22127               | -3.45668               | 7.84057                | -3.73564               | -3.89645               | 10.5945                | -5.0522                |
| LOC643082 | 0.399922          | 0.218536            | -4.57591             | 1 down vs 2          | 0.820587      | 40.5741        | 296.671   | 1        | 2.34924                | 5.41871                | -2.00106               | -2.17626               | 3.72966                | 1.02405                | 5.59894                | 19.7229                |
| LOC643159 | 0.17726           | -0.234253           | -4.26888             | 1 down vs 2          | 2.33622       | 888.75         | 2282.53   | 1        | -6.36249               | 2.73437                | 47.9529                | -17.6724               | 11.6386                | 1.15546                | 32.8765                | 3.47798                |
| LOC643226 | 0.032385          | -0.670957           | -1.49041             | 1 down vs 2          | 7.67774       | 460.746        | 360.064   | 1        | -10.8375               | 17.6841                | 20.5341                | -5.97868               | -2.06725               | 1.80421                | 3.7376                 | 3.14669                |
| LOC643311 | 0.113671          | -0.665107           | -1.50352             | 1 down vs 2          | 3.42529       | 10961.8        | 19201.6   | 1        | -85.6841               | 2.8453                 | 2.39032                | -2.97598               | -2.96447               | 131.498                | 88.6589                | 4.20593                |
| LOC643445 | 0.309084          | -0.683017           | -1.46409             | 1 down vs 2          | 1.23439       | 97.0055        | 471.516   | 1        | -8.66563               | 20.6456                | 2.97312                | 3.32452                | -3.41602               | 1.19743                | 3.18199                | -6.6294                |
| LOC643700 | 0.150631          | -0.535555           | -1.86722             | 1 down vs 2          | 2.71302       | 315.733        | 698.261   | 1        | -2.29168               | 7.35856                | 29.0362                | -5.20325               | -6.08255               | -1.02216               | 11.3618                | -4.48075               |
| LOC643811 | 0.124438          | -0.281653           | -3.55047             | 1 down vs 2          | 3.18775       | 575.049        | 1082.36   | 1        | -5.74029               | 22.7403                | 2.24708                | -3.04845               | -2.75687               | -3.84344               | 10.1583                | 37.0183                |
| LOC644124 | 0.0138275         | -0.315459           | -3.16998             | 1 down vs 2          | 11.8228       | 253.303        | 128.549   | 1        | -2.93339               | 9.84974                | 7.59608                | -3.30507               | -2.12347               | 6.89403                | 17.6374                | 2.20136                |
| LOC644196 | 0.440303          | -0.126027           | -7.93478             | 1 down vs 2          | 0.682596      | 1156.47        | 10165.3   | 1        | 3.64058                | 2.14937                | 4.35194                | -9.83991               | -2.13947               | -2.35681               | -5.43495               | 111.568                |
| LOC644234 | 0.404351          | -0.556244           | -1.79777             | 1 down vs 2          | 0.80432       | 182.679        | 1362.73   | 1        | -2.11858               | -2.12074               | 2.06447                | -2.66733               | -5.79815               | -4.71231               | 38.9721                | -2.49062               |
| LOC644335 | 0.526766          | 0.234334            | -4.26742             | 1 down vs 2          | 0.451205      | 39.4638        | 524.778   | 1        | -2.8545                | 2.71339                | 5.63316                | 16.1513                | -9.08454               | 1.09727                | 2.9118                 | 17.6035                |
| LOC644420 | 0.0472942         | -0.3967             | -2.5208              | 1 down vs 2          | 6.18983       | 34.0001        | 32.9574   | 1        | 2.35052                | -2.18832               | -3.08188               | -2.62355               | 3.90147                | -1.101                 | -5.25184               | -3.62122               |
| LOC644516 | 0.473555          | -0.0194992          | -51.284              | 1 down vs 2          | 0.584458      | 1667.16        | 17114.9   | 1        | -2.98276               | 145.881                | 2.60659                | 6.49786                | -5.22606               | -3.27326               | 3.29372                | -2.26652               |
| LOC644518 | 0.827533          | 0.491477            | -2.03468             | 1 down vs 2          | 0.0517903     | 26.7932        | 3104.04   | 1        | -5.44152               | 5.50323                | -3.52876               | -2.38914               | -3.12973               | -56.1776               | 4.54846                | 12.4865                |
| LOC644554 | 0.193967          | -0.163015           | -6.13442             | 1 down vs 2          | 2.13844       | 562.734        | 1578.91   | 1        | 6.8226                 | 24.9808                | -4.16287               | 2.05027                | -16.1576               | 3.33246                | 40.5794                | 9.74957                |
| LOC644625 | 0.393214          | 0.344312            | -2.90434             | 1 down vs 2          | 0.845803      | 157.882        | 1119.99   | 1        | 4.61687                | 20.2922                | 40.6082                | 6.6928                 | 3.14615                | 1.25893                | 3.88181                | 3.9332                 |
| LOC644739 | 0.237273          | -0.451676           | -2.21398             | 1 down vs 2          | 1.72305       | 37.4845        | 130.528   | 1        | 3.23375                | 2.88966                | -4.94953               | -4.96841               | 5.90819                | -2.95425               | -8.2103                | -2.17574               |
| LOC645332 | 0.0678744         | -0.695306           | -1.43822             | 1 down vs 2          | 4.94375       | 612.3          | 743.12    | 1        | -3.44533               | 6.65386                | 2.63615                | -2.12945               | -16.6599               | -1.25002               | 15.3765                | 29.8806                |

| Gene ID   | p-value (1 vs. 2) | MeanRatio (1 vs. 2) | FoldChange (1 vs. 2) | FoldChange (1 vs. 2) | F(Gene Group) | SS(Gene Group) | SS(Error) | F(Error) | FoldChange (106 vs. n) | FoldChange (111 vs. n) | FoldChange (112 vs. n) | FoldChange (121 vs. n) | FoldChange (347 vs. n) | FoldChange (353 vs. n) | FoldChange (537 vs. n) | FoldChange (563 vs. n) |
|-----------|-------------------|---------------------|----------------------|----------------------|---------------|----------------|-----------|----------|------------------------|------------------------|------------------------|------------------------|------------------------|------------------------|------------------------|------------------------|
| LOC645465 | 0.868587          | 0.618531            | -1.61673             | 1 down vs 2          | 0.0298156     | 6.81559        | 1371.55   | 1        | -4.07612               | -35.554                | 3.00433                | 3.52045                | -8.7185                | -1.8855                | -2.30639               | 11.7518                |
| LOC645537 | 0.741266          | 0.871466            | -1.14749             | 1 down vs 2          | 0.119606      | 0.643966       | 32.3045   | 1        | -6.39871               | -7.13815               | -2.58615               | -2.6041                | -2.9174                | -3.50487               | -2.36788               | -7.20019               |
| LOC645590 | 0.568135          | -0.71945            | -1.38995             | 1 down vs 2          | 0.364481      | 7.24474        | 119.261   | 1        | -3.05806               | 2.44601                | -5.72494               | 3.30679                | 2.21869                | -7.23203               | 2.22435                | 2.57062                |
| LOC645700 | 0.646125          | 0.31292             | -3.1957              | 1 down vs 2          | 0.233418      | 157.461        | 4047.53   | 1        | -3.09636               | -3.96847               | -68.7543               | 3.73812                | -13.1626               | -2.36317               | 6.28217                | 2.11567                |
| LOC645711 | 0.453735          | -0.693035           | -1.44293             | 1 down vs 2          | 0.641417      | 77.1964        | 722.117   | 1        | -4.74637               | 2.64329                | -2.11339               | 5.19078                | 7.43527                | -1.31985               | 7.22647                | -25.3862               |
| LOC645893 | 0.0737217         | -0.949149           | -1.05358             | 1 down vs 2          | 4.68066       | 812.286        | 1041.25   | 1        | -3.82872               | 4.10569                | 2.94462                | -24.1437               | -2.43395               | -3.56048               | 28.9973                | 20.9052                |
| LOC646155 | 0.459431          | -0.0211642          | -47.2497             | 1 down vs 2          | 0.624599      | 16452.3        | 158044    | 1        | -3.09216               | -5.38459               | 446.944                | -7.03246               | 4.30037                | -4.75472               | 11.7938                | 10.0582                |
| LOC646347 | 0.00854719        | -0.639523           | -1.56367             | 1 down vs 2          | 14.7547       | 256.72         | 104.396   | 1        | -5.87781               | 7.66417                | 6.76631                | -2.02752               | -5.78738               | 4.20256                | 14.9233                | 2.12836                |
| LOC646667 | 0.266172          | -0.16112            | -6.20655             | 1 down vs 2          | 1.50278       | 457.734        | 1827.54   | 1        | 2.26603                | 2.10844                | 41.8215                | -10.8359               | 2.06558                | 3.60742                | 28.0214                | -8.27678               |
| LOC646764 | 0.754261          | 0.199089            | -5.02289             | 1 down vs 2          | 0.107397      | 3.71711        | 207.666   | 1        | -6.95426               | 2.05778                | -2.33834               | -3.18695               | 11.1912                | 2.0181                 | 4.26166                | 2.79077                |
| LOC646841 | 0.612904          | 0.155608            | -6.4264              | 1 down vs 2          | 0.284555      | 1434.82        | 30254.1   | 1        | -8.2807                | -2.5846                | -187.441               | -2.32789               | -4.68496               | 2.55646                | 2.47535                | 21.1897                |
| LOC646909 | 0.159736          | -0.475069           | -2.10496             | 1 down vs 2          | 2.57427       | 400.203        | 932.777   | 1        | -9.83134               | -2.07272               | 2.81901                | -2.07071               | -2.21374               | 1.64697                | 34.9293                | 12.1993                |
| LOC647044 | 0.631285          | -0.392425           | -2.54826             | 1 down vs 2          | 0.255455      | 120.545        | 2831.31   | 1        | -6.10434               | 49.1034                | 2.43325                | 2.81227                | -3.48716               | -1.9923                | 2.2478                 | -23.0001               |
| LOC647089 | 0.388872          | -0.131918           | -7.58049             | 1 down vs 2          | 0.862509      | 649.219        | 4516.26   | 1        | -3.32704               | 2.371                  | 2.44161                | 3.24567                | -6.42448               | 76.034                 | 4.21427                | -2.86498               |
| LOC647286 | 0.48071           | 0.0109972           | -90.9319             | 1 down vs 2          | 0.564938      | 184230         | 1.96E+06  | 1        | -5.65146               | 4.30634                | 1567.88                | -7.14322               | 23.2512                | 4.39214                | 5.33334                | 2.80705                |
| LOC647360 | 0.0923658         | 0.0923658           | -1.49805             | 1 down vs 2          | 4.00189       | 324.688        | 486.802   | 1        | -3.50782               | 14.2134                | 2.55187                | 2.13462                | -14.4303               | -1.40547               | 20.8658                | 3.23173                |
| LOC647444 | 0.826091          | 0.413117            | -2.42062             | 1 down vs 2          | 0.0526782     | 28.7219        | 3271.4    | 1        | -3.6254                | 2.03467                | 21.2458                | -2.08679               | -2.55291               | 1.30701                | -2.91568               | -55.0163               |
| LOC647571 | 0.433843          | 0.41847             | -2.38966             | 1 down vs 2          | 0.703192      | 14.3662        | 122.58    | 1        | 4.67443                | 3.21301                | 12.2552                | -3.76208               | 5.06328                | 1.52935                | 3.66549                | 3.13646                |
| LOC647942 | 0.135271          | 0.108242            | -9.23857             | 1 down vs 2          | 2.97591       | 68.7242        | 138.561   | 1        | -2.17842               | 11.4234                | 8.44156                | 2.33089                | 2.0521                 | -2.16385               | 11.1116                | 5.1324                 |
| LOC648164 | 0.141038          | -0.0493359          | -20.2692             | 1 down vs 2          | 2.87253       | 258.613        | 540.177   | 1        | -4.96325               | 26.914                 | 12.2648                | 5.42037                | -2.11363               | -2.167373              | 14.7518                | 3.70342                |
| LOC649179 | 0.162606          | -0.630789           | -1.58532             | 1 down vs 2          | 2.53281       | 437.456        | 1036.29   | 1        | -3.96511               | 3.37196                | 9.64757                | -3.4958                | -10.2636               | -8.32635               | 34.9395                | 7.19888                |
| LOC649198 | 0.627142          | -0.078205           | -12.7869             | 1 down vs 2          | 0.261838      | 45.9252        | 1052.38   | 1        | 21.6325                | 6.86782                | -6.448                 | -3.67011               | -19.0393               | 13.6319                | 4.52264                | 4.37622                |
| LOC649341 | 0.454713          | -0.575593           | -1.73734             | 1 down vs 2          | 0.638502      | 85.7444        | 805.739   | 1        | -2.84085               | 3.33617                | 26.0268                | -8.48805               | 3.91759                | -1.2209                | 4.01925                | -10.7014               |
| LOC649443 | 0.369153          | -0.243415           | -4.10822             | 1 down vs 2          | 0.942399      | 33.7106        | 214.626   | 1        | 5.04883                | 2.37658                | 2.19928                | 5.04897                | -12.588                | 5.2737                 | 4.3662                 | 2.83471                |
| LOC649722 | 0.113521          | -0.336054           | -2.97572             | 1 down vs 2          | 3.42882       | 816.911        | 1429.49   | 1        | -17.6981               | 25.3799                | 2.79244                | 4.04621                | -2.09855               | 3.55517                | 41.3334                | 5.05381                |
| LOC649812 | 0.499654          | -0.336092           | -2.97537             | 1 down vs 2          | 0.515756      | 50.0317        | 582.039   | 1        | -4.82167               | 3.90531                | -21.1944               | 11.9333                | -3.21342               | -2.81621               | 2.95412                | -2.17987               |
| LOC650120 | 0.262943          | -0.101195           | -9.88192             | 1 down vs 2          | 1.5256        | 49.3992        | 194.28    | 1        | -3.04728               | -13.4575               | -5.9924                | 2.16315                | 2.29919                | -2.48673               | -6.17071               | 4.80149                |
| LOC650177 | 0.316727          | 0.126244            | -7.92115             | 1 down vs 2          | 1.19247       | 77.1788        | 388.329   | 1        | -3.29692               | 8.33096                | 5.40236                | 8.87707                | -2.79921               | 4.88974                | 20.8106                | -2.71994               |
| LOC650227 | 0.383425          | -0.169191           | -5.91047             | 1 down vs 2          | 0.883908      | 14952.8        | 101500    | 1        | -8.6456                | 2.9561                 | -7.14022               | -4.03194               | -26.0905               | 3.14677                | 22.6328                | 360.3                  |
| LOC650656 | 0.34806           | -0.22247            | -4.49499             | 1 down vs 2          | 1.03584       | 58.9433        | 341.421   | 1        | 2.39257                | 4.33285                | -2.80565               | 2.78443                | -2.11595               | -9.07536               | 2.41792                | -17.8021               |
| LOC650781 | 0.503831          | 0.0718634           | -13.9153             | 1 down vs 2          | 0.505377      | 2896.59        | 34389.2   | 1        | 5.91821                | -2.03522               | 208.013                | 5.49904                | -2.28748               | 5.25211                | 2.69413                | -2.18504               |
| LOC651441 | 0.262016          | -0.260159           | -4.80403             | 1 down vs 2          | 1.53223       | 33862.6        | 132601    | 1        | -3.07149               | -61.3757               | 2.62511                | -63.6957               | -2.69548               | 291.631                | 321.206                | 2.0811                 |
| LOC651515 | 0.273937          | -0.772658           | -1.29423             | 1 down vs 2          | 1.44956       | 817.324        | 3383.07   | 1        | -4.50817               | 2.8866                 | 31.9217                | -25.5327               | 2.73978                | -1.00889               | 46.4736                | -21.383                |
| LOC651686 | 0.569818          | 0.148773            | -6.72165             | 1 down vs 2          | 0.361228      | 16.9992        | 282.356   | 1        | -2.37979               | 6.91306                | 3.65887                | -2.55904               | 6.51758                | -4.60046               | 14.2269                | -2.51204               |
| LOC651769 | 0.448304          | 0.00343759          | -290.901             | 1 down vs 2          | 0.657807      | 13380.7        | 122049    | 1        | -23.2305               | 3.52568                | -394.177               | 33.7231                | -11.3668               | -1.70618               | -3.80812               | -27.6774               |
| LOC652046 | 0.812567          | 0.346749            | -2.88393             | 1 down vs 2          | 0.0613945     | 7.62597        | 745.275   | 1        | -2.93531               | 2.6389                 | -25.4504               | -2.3944                | 2.11824                | -1.21385               | 10.794                 | -2.20473               |
| LOC652258 | 0.42598           | -0.567535           | -1.76201             | 1 down vs 2          | 0.728988      | 41.0138        | 337.568   | 1        | -3.14882               | 2.58097                | -2.54654               | 2.76085                | -4.692                 | 2.13659                | -4.85519               | 17.6024                |
| LOC652515 | 0.504446          | -0.249325           | -4.01083             | 1 down vs 2          | 0.503863      | 845.553        | 10068.8   | 1        | -2.19996               | -10.6248               | -11.5336               | -8.19174               | -2.32227               | 105.908                | 4.28328                | -3.04354               |
| LOC652577 | 0.430119          | 0.281806            | -3.54855             | 1 down vs 2          | 0.715308      | 218.739        | 1834.79   | 1        | -2.40526               | -45.2941               | 2.10751                | -7.0397                | -3.26932               | -8.2008                | 4.63156                | -28.4395               |
| LOC652809 | 0.260353          | -0.265288           | -3.76949             | 1 down vs 2          | 1.54421       | 398.378        | 1547.89   | 1        | -5.65486               | 4.06544                | 46.2256                | 2.09503                | -5.60864               | 1.85765                | 2.79712                | 2.65489                |
| LOC652869 | 0.200219          | -0.322643           | -3.0994              | 1 down vs 2          | 2.07057       | 36.0914        | 104.584   | 1        | -2.55993               | 3.4119                 | 6.04443                | 2.09059                | -2.74138               | 4.48344                | 7.3569                 | -4.71118               |
| LOC653200 | 0.481303          | 0.202167            | -4.9464              | 1 down vs 2          | 0.563343      | 18.368         | 195.632   | 1        | -2.29404               | 2.67607                | -15.2777               | -2.26334               | 2.17807                | -1.08028               | -2.93188               | -3.00123               |
| LOC653238 | 0.803384          | 0.420076            | -2.38052             | 1 down vs 2          | 0.0677216     | 5.64003        | 499.696   | 1        | -2.97997               | 20.2796                | -3.77114               | 9.24549                | -2.49659               | -2.75662               | 3.3169                 | -2.11537               |
| LOC653352 | 0.666343          | 0.0148774           | -67.2163             | 1 down vs 2          | 0.205377      | 26.5638        | 776.049   | 1        | -2.93777               | 7.39182                | -2.164                 | 8.49224                | -5.725                 | -25.0742               | 5.22992                | -4.8752                |
| LOC653604 | 0.579404          | 0.246794            | -4.05196             | 1 down vs 2          | 0.343083      | 107.631        | 1882.31   | 1        | -22.7396               | 13.2545                | 17.5153                | 34.7374                | -4.55029               | 3.13828                | 12.4154                | 3.97153                |
| LOC653879 | 0.138113          | -0.899819           | -1.11133             | 1 down vs 2          | 2.92421       | 28.2657        | 57.9966   | 1        | 2.17828                | 3.53114                | 3.02239                | -5.494                 | -2.20116               | -2.66948               | 2.6882                 | 3.64625                |
| LOC653941 | 0.36325           | -0.140631           | -7.11079             | 1 down vs 2          | 0.96767       | 520.696        | 3228.56   | 1        | -6.69467               | 64.561                 | 3.87884                | 4.22782                | -3.69697               | 5.5252                 | 2.54113                | -3.45682               |
| LOC727735 | 0.136321          | -0.247973           | -4.03269             | 1 down vs 2          | 2.95663       | 147.814        | 299.963   | 1        | -5.42675               | 3.00445                | 2.16172                | 2.67209                | -2.53804               | -1.32781               | 15.4492                | 16.2855                |
| LOC727735 | 0.649089          | -0.128726           | -7.76843             | 1 down vs 2          | 0.229165      | 12.5773        | 329.3     | 1        | -8.61118               | -3.03105               | 2.94888                | 13.2551                | -5.53004               | 2.73507                | 2.04409                | 6.77595                |
| LOC727758 | 0.985679          | 0.960077            | -1.04158             | 1 down vs 2          | 0.00035006    | 0.193499       | 3316.54   | 1        | -16.2995               | 8.14126                | 2.17505                | -2.53863               | -4.33826               | -1.36785               | 8.92079                | -58.1028               |
| LOC727851 | 0.566777          | 0.0532448           | -18.7812             | 1 down vs 2          | 0.367122      | 1719.27        | 28098.6   | 1        | -2.71187               | 8.59563                | 5.9284                 | -6.51807               | 4.12099                | -181.707               | 4.75713                | 2.50561                |
| LOC727868 | 0.275287          | -0.295804           | -3.38062             | 1 down vs 2          | 1.44054       | 199.788        | 832.14    | 1        | -2.19253               | 5.16663                | -2.13884               | -2.21755               | -2.65912               | -1.86751               | 5.79164                | 32.8785                |

| Gene ID   | p-value (1 vs. 2) | MeanRatio (1 vs. 2) | FoldChange (1 vs. 2) | FoldChange (1 vs. 2) | F(Gene Group) | SS(Gene Group) | SS(Error) | F(Error) | FoldChange (106 vs. n) | FoldChange (111 vs. n) | FoldChange (112 vs. n) | FoldChange (121 vs. n) | FoldChange (347 vs. n) | FoldChange (353 vs. n) | FoldChange (537 vs. n) | FoldChange (563 vs. n) |
|-----------|-------------------|---------------------|----------------------|----------------------|---------------|----------------|-----------|----------|------------------------|------------------------|------------------------|------------------------|------------------------|------------------------|------------------------|------------------------|
| LOC728160 | 0.552811          | 0.362267            | -2.7604              | 1 down vs 2          | 0.395059      | 62.91          | 955.453   | 1        | 2.5233                 | 30.3631                | 4.22557                | -9.1309                | 16.4788                | -2.31866               | 4.62306                | 8.52098                |
| LOC728503 | 0.197663          | -0.207899           | -4.81002             | 1 down vs 2          | 2.09795       | 1125           | 3217.43   | 1        | -2.54465               | 4.97001                | 4.41253                | -6.3818                | -3.72148               | 12.9563                | 70.5837                | 8.47205                |
| LOC728627 | 0.249561          | -0.350485           | -2.85319             | 1 down vs 2          | 1.6248        | 14.7121        | 54.3284   | 1        | -3.57069               | 2.1273                 | 2.03749                | 5.25569                | -3.86591               | 1.45151                | 2.47924                | 2.27538                |
| LOC728694 | 0.0862126         | -0.824204           | -1.21329             | 1 down vs 2          | 4.20351       | 91.5917        | 130.736   | 1        | -3.87643               | 3.45549                | 2.2817                 | -2.00441               | -3.59265               | 12.7225                | 3.72833                | -2.03118               |
| LOC728819 | 0.0430123         | -0.318584           | -3.13889             | 1 down vs 2          | 6.54443       | 535.194        | 490.671   | 1        | -12.8272               | 13.2016                | 2.1838                 | 2.88618                | -2.30492               | 5.49587                | 26.1567                | 17.0265                |
| LOC728835 | 0.0764417         | -0.923161           | -1.08324             | 1 down vs 2          | 4.56777       | 207.262        | 272.249   | 1        | -5.50541               | 4.28444                | 2.18319                | -6.41734               | -3.21781               | -1.07907               | 19.6664                | 2.27968                |
| LOC729051 | 0.417947          | 0.259999            | -3.84617             | 1 down vs 2          | 0.756195      | 66.0217        | 523.846   | 1        | 5.23341                | -10.494                | -2.95462               | -3.06009               | -8.42796               | -24.6999               | -4.11747               | 2.17193                |
| LOC729153 | 0.274467          | -0.93073            | -1.07443             | 1 down vs 2          | 1.446         | 561.052        | 2328.01   | 1        | 2.64388                | 2.75771                | -3.16892               | -29.9379               | 2.27764                | 7.54434                | -6.12468               | 43.7886                |
| LOC729193 | 0.328268          | -0.596194           | -1.67731             | 1 down vs 2          | 1.13207       | 53.8392        | 285.348   | 1        | -9.61303               | 2.47839                | 8.70111                | -2.22283               | 5.83143                | -6.42543               | 9.67929                | 2.35208                |
| LOC729225 | 0.0181524         | -0.722552           | -1.38398             | 1 down vs 2          | 10.3641       | 89.5919        | 51.8666   | 1        | -3.12389               | 4.72347                | 7.91568                | -3.0336                | -2.54116               | -1.7785                | 5.52365                | 3.68034                |
| LOC729264 | 0.349862          | 0.321793            | -3.10758             | 1 down vs 2          | 1.02751       | 227.971        | 1331.21   | 1        | -4.72958               | 31.01                  | 8.53178                | 23.4983                | -3.07319               | 32.6846                | 2.6317                 | 6.43387                |
| LOC729275 | 0.278197          | -0.399177           | -2.50515             | 1 down vs 2          | 1.42131       | 16.484         | 69.5868   | 1        | -2.54841               | 5.78488                | 5.04135                | 2.43742                | -2.42674               | 1.02941                | 2.12039                | -3.38036               |
| LOC729417 | 0.224357          | 0.00873838          | -114.438             | 1 down vs 2          | 1.83468       | 13.3851        | 43.7734   | 1        | -2.63431               | 2.25598                | 2.06603                | -2.221                 | 4.92597                | 1.13395                | 3.2518                 | 4.76918                |
| LOC729562 | 0.329037          | -0.381291           | -2.62267             | 1 down vs 2          | 1.12817       | 3586.08        | 19072.1   | 1        | 15.8713                | -152.838               | -4.00093               | 28.4316                | -8.08678               | -1.16579               | -3.22019               | 2.92006                |
| LOC729841 | 0.0047987         | -0.885834           | -1.12888             | 1 down vs 2          | 18.9623       | 106.683        | 33.7563   | 1        | -3.3322                | 8.23683                | 2.30585                | -2.18344               | -5.11395               | 1.3038                 | 4.8806                 | 3.27214                |
| LOC729926 | 0.209146          | -0.338087           | -2.95782             | 1 down vs 2          | 1.97877       | 401.84         | 1218.45   | 1        | -2.19022               | 5.61626                | 38.4166                | -6.01227               | -4.05693               | 16.7546                | -2.0275                |                        |
| LOC729989 | 0.103553          | -0.0259955          | -38.4682             | 1 down vs 2          | 3.67871       | 2583.42        | 4213.58   | 1        | -2.35785               | 67.3416                | 4.43411                | -2.66215               | 2.19856                | 28.2199                | 73.0071                | 7.89032                |
| LOC730107 | 0.444397          | -0.136886           | -7.30537             | 1 down vs 2          | 0.669814      | 156.445        | 1401.39   | 1        | -6.10701               | 40.0421                | 2.8091                 | 6.07559                | -3.26804               | 3.36708                | -2.01405               | -4.03127               |
| LOC730291 | 0.423489          | -0.685261           | -1.4593              | 1 down vs 2          | 0.737328      | 31.3563        | 255.161   | 1        | -4.16618               | 13.5511                | -2.57224               | 4.13665                | -4.95899               | -1.62702               | 5.696                  | -2.91495               |
| LOC730525 | 0.0707523         | -0.546214           | -3.81078             | 1 down vs 2          | 4.81056       | 1084.46        | 1352.6    | 1        | -8.22617               | 17.3302                | 2.4255                 | -10.2004               | -7.06059               | 6.72079                | 46.7451                | 4.54754                |
| LOC731158 | 0.267391          | -0.278545           | -3.59009             | 1 down vs 2          | 1.49427       | 70.4986        | 283.075   | 1        | -5.69128               | -3.14576               | -7.13524               | -3.49677               | 13.1957                | 1.036                  | -4.6978                | -10.0369               |
| LOC731631 | 0.0390025         | -0.169871           | -5.88683             | 1 down vs 2          | 6.92265       | 779.276        | 675.414   | 1        | -3.78482               | 5.07636                | 11.5444                | 3.32049                | -8.41636               | 30.1493                | 9.19571                | 31.1661                |
| LOC731837 | 0.644318          | 0.222446            | -4.49548             | 1 down vs 2          | 0.236033      | 75.8913        | 1929.17   | 1        | -3.27166               | -8.91247               | 45.9075                | 3.83083                | 4.90105                | 2.66013                | -3.22269               | 4.47802                |
| LOC732435 | 0.160441          | -0.305285           | -3.27563             | 1 down vs 2          | 2.56399       | 365.038        | 544.226   | 1        | -2.55544               | 3.54522                | 7.87479                | -3.77049               | -3.46423               | 8.58975                | -2.21939               | 35.6578                |
| LOXL4     | 0.0250455         | -0.499245           | -2.00303             | 1 down vs 2          | 8.80477       | 289.443        | 197.24    | 1        | -2.44867               | 3.88545                | 6.58763                | -4.79985               | -5.16351               | 8.78782                | 19.8824                | 2.29273                |
| LPNH2     | 0.300012          | -0.479787           | -2.08426             | 1 down vs 2          | 1.28624       | 655.64         | 3058.39   | 1        | -3.40514               | 8.72655                | -2.88303               | -9.84511               | -4.93849               | 1.29194                | 61.0192                | -4.97127               |
| LPPR4     | 0.367705          | -0.310102           | -3.22475             | 1 down vs 2          | 0.948538      | 191846         | 1.21E+06  | 1        | -162.097               | -5.95439               | 3.99323                | -32.266                | -32.7783               | 14.1004                | 1224.7                 | -16.0501               |
| LRCH1     | 0.402717          | -0.1715             | -5.83091             | 1 down vs 2          | 0.810286      | 279345         | 2.07E+06  | 1        | -47.6866               | 4.09689                | 1614.81                | -23.9027               | -97.9274               | -1.67121               | 27.9844                | 2.17525                |
| LRFN4     | 0.253864          | -0.187467           | -5.33428             | 1 down vs 2          | 1.59206       | 260.384        | 981.312   | 1        | -5.27666               | 2.81799                | 2.06465                | 2.94482                | -3.2494                | 3.7431                 | 37.3875                | 3.60658                |
| LRRC29    | 0.159528          | -0.470224           | -2.12664             | 1 down vs 2          | 2.57732       | 5463.23        | 12718.4   | 1        | -4.52532               | 22.6868                | 128.637                | -4.6867                | -42.5805               | -1.43861               | -3.95442               | 37.643                 |
| LRRK1     | 0.0273991         | -0.515859           | -1.93851             | 1 down vs 2          | 8.39951       | 168.904        | 120.652   | 1        | -4.92104               | 3.71275                | 13.6484                | -2.37177               | -2.39694               | 1.52354                | 2.15818                | 10.2633                |
| LRRN3     | 0.215365          | -0.478492           | -2.0899              | 1 down vs 2          | 1.91809       | 965.516        | 3020.24   | 1        | -14.5361               | 7.39936                | 2.38306                | -3.37399               | -4.12201               | 6.33081                | 63.3431                | -2.71484               |
| LRRTM1    | 0.156358          | -0.841821           | -1.1879              | 1 down vs 2          | 2.62442       | 666.389        | 1523.51   | 1        | -21.0529               | 5.79044                | 4.80633                | 2.00311                | -6.79999               | 8.11541                | 39.9723                | -7.50616               |
| LRRTM4    | 0.230107          | -0.447937           | -2.23246             | 1 down vs 2          | 1.78386       | 1443.23        | 4854.29   | 1        | -18.5659               | 12.3004                | 4.23763                | -2.20486               | -4.97796               | 3.75919                | 79.6022                | -4.09464               |
| LSP1      | 0.204046          | -0.717934           | -1.39289             | 1 down vs 2          | 2.0305        | 5861.33        | 17319.8   | 1        | -3.91862               | 5.87062                | 3.80518                | 2.00307                | -68.181                | 3.89492                | 9.77986                | 139.377                |
| LTBP2     | 0.112419          | -0.124478           | -1.08169             | 1 down vs 2          | 3.45494       | 9222.12        | 16015.5   | 1        | -12.0133               | 3.79855                | 6.17097                | -36.8404               | -52.2157               | 3.9218                 | 145.8                  | 22.5185                |
| LYVE1     | 0.251064          | -0.37085            | -2.69651             | 1 down vs 2          | 1.61326       | 1107.42        | 4118.68   | 1        | -2.94917               | 2.19906                | 74.1996                | -13.9913               | -2.78311               | -1.49117               | 7.44225                | 6.29148                |
| LYZ       | 0.038011          | -0.842433           | -1.18704             | 1 down vs 2          | 7.02434       | 6487.73        | 5541.64   | 1        | -2.35757               | 24.2569                | 71.4699                | -70.4061               | -7.92466               | 7.49727                | 13.3812                | 43.0283                |
| MAB21L1   | 0.243087          | -0.188103           | -5.31625             | 1 down vs 2          | 1.67565       | 1433.43        | 5132.67   | 1        | -11.3915               | 25.33                  | 3.99759                | 2.3462                 | -4.08727               | 5.71035                | 83.9581                | -2.63611               |
| MAFF      | 0.614985          | 0.0678742           | -14.7331             | 1 down vs 2          | 0.281156      | 47.6577        | 1017.04   | 1        | -2.22831               | 21.2381                | 8.34795                | 5.74356                | -2.41392               | -20.6849               | 7.23426                | 10.908                 |
| MAGEA9B   | 0.626406          | 0.058327            | -17.1447             | 1 down vs 2          | 0.262981      | 185.318        | 4228.1    | 1        | -37.4225               | 3.17591                | -2.4773                | 41.4566                | -2.18675               | 3.15526                | 9.64696                | 39.2863                |
| MAGEB1    | 0.219429          | -0.639197           | -1.56446             | 1 down vs 2          | 1.87978       | 183.797        | 586.655   | 1        | -8.57713               | 2.5429                 | -17.0614               | 14.4167                | 5.74268                | -4.4037                | 2.06978                | -13.3476               |
| MAGED2    | 0.451954          | -0.0522055          | -19.1551             | 1 down vs 2          | 0.646756      | 69656          | 646203    | 1        | -2.71904               | 2.98857                | 5.61611                | -22.4393               | -3.53068               | 8.09965                | 902.006                | -2.81062               |
| MAGI3     | 0.0716335         | -0.623597           | -1.6036              | 1 down vs 2          | 4.77125       | 330.403        | 415.492   | 1        | -7.58447               | 13.2778                | 5.25571                | -2.96124               | -4.74996               | 4.62218                | 22.2132                | -4.48867               |
| MAK       | 0.349127          | -0.0303736          | -32.9233             | 1 down vs 2          | 1.0309        | 3619.38        | 21065.3   | 1        | -2.57976               | 3.78647                | 14.5092                | -4.26275               | 2.95708                | 7.97652                | 172.103                | 14.8269                |
| MAPK8IP3  | 0.579285          | -0.130604           | -7.65672             | 1 down vs 2          | 0.343304      | 111.502        | 1948.74   | 1        | -6.08093               | -4.46202               | 42.9527                | 6.83325                | -3.42476               | -4.8999                | 10.24                  | -9.72723               |
| MASP1     | 0.623463          | -0.966458           | -1.03471             | 1 down vs 2          | 0.26759       | 44.5442        | 998.786   | 1        | 7.51925                | 3.71153                | -17.3698               | 5.2089                 | -19.9146               | 8.80481                | 5.10736                | 12.1392                |
| MCOLN2    | 0.400315          | -0.050449           | -19.822              | 1 down vs 2          | 0.819133      | 837.146        | 6131.94   | 1        | -2.53522               | 2.2931                 | 2.88981                | 3.34004                | -3.8492                | 1.34862                | 89.9648                | 4.07979                |
| MCRS1     | 0.511112          | 0.049282            | -20.2914             | 1 down vs 2          | 0.487673      | 15581.9        | 191710    | 1        | -6.31479               | 5.32829                | 2.51996                | -4.63885               | -3.22283               | -6.98761               | 7.08914                | -487.383               |
| MDFIC     | 0.150915          | -0.673938           | -1.48382             | 1 down vs 2          | 2.70852       | 1922.05        | 4257.78   | 1        | -10.0094               | 7.07345                | 7.06931                | 3.05598                | -31.7174               | 14.3726                | 71.7095                | -4.59092               |
| MFI2      | 0.215005          | -0.735686           | -1.35928             | 1 down vs 2          | 1.92153       | 150.25         | 469.158   | 1        | -2.66119               | 2.40215                | 20.58                  | -4.92838               | -3.79324               | 1.50654                | 9.79168                | -8.49306               |
| MFSO1     | 0.000641166       | -0.975114           | -1.02552             | 1 down vs 2          | 42.0036       | 123.533        | 17.6461   | 1        | -3.74247               | 3.81396                | 3.33367                | -3.66289               | -4.61662               | 1.2094                 | 5.87414                | 6.31683                |

| Gene ID    | p-value (1 vs. 2) | MeanRatio (1 vs. 2) | FoldChange (1 vs. 2) | FoldChange (1 vs. 2) | F(Gene Group) | SS(Gene Group) | SS(Error) | F(Error) | FoldChange (106 vs. n) | FoldChange (111 vs. n) | FoldChange (112 vs. n) | FoldChange (121 vs. n) | FoldChange (347 vs. n) | FoldChange (353 vs. n) | FoldChange (537 vs. n) | FoldChange (563 vs. n) |
|------------|-------------------|---------------------|----------------------|----------------------|---------------|----------------|-----------|----------|------------------------|------------------------|------------------------|------------------------|------------------------|------------------------|------------------------|------------------------|
| MGAM       | 0.0767335         | -0.0656203          | -15.2392             | 1 down vs 2          | 4.55599       | 835.818        | 1100.73   | 1        | -13.0563               | 10.5309                | 6.67117                | 15.344                 | -6.18813               | 23.3365                | 18.9752                | 39.5518                |
| MGC4294    | 0.163469          | -0.508618           | -1.96611             | 1 down vs 2          | 2.52055       | 17094.7        | 40692.9   | 1        | -5.51771               | 85.0315                | -22.2097               | -94.077                | 3.01981                | 15.9407                | 22.1204                | 215.579                |
| MGC4677    | 0.000800956       | -0.807188           | -1.23887             | 1 down vs 2          | 38.6309       | 334.916        | 52.0179   | 1        | -3.68219               | 11.5314                | 5.51451                | -9.05561               | -5.17074               | 7.59026                | 3.62679                | 8.71424                |
| MGC5457    | 0.42592           | -0.192967           | -5.18224             | 1 down vs 2          | 0.729186      | 6.60779        | 70.828    | 1        | -2.55531               | 2.4305                 | 3.72389                | 5.63154                | -4.11596               | -1.60014               | 2.17761                | 2.24836                |
| MIR1236    | 0.530493          | 0.100474            | -9.95282             | 1 down vs 2          | 0.442834      | 1733.27        | 23484.2   | 1        | -2.67856               | -3.60909               | 4.34286                | -4.41301               | -3.09653               | -1.19754               | -170.753               | 2.21615                |
| MIR24-1    | 0.996039          | 0.844812            | -1.1837              | 1 down vs 2          | 2.68E-05      | 0.0910957      | 20410.7   | 1        | -100.313               | 3.54542                | -4.1315                | 101.318                | -4.60474               | -4.07776               | 2.42971                | -4.86753               |
| MIR26A1    | 0.196933          | -0.157104           | -6.36521             | 1 down vs 2          | 2.10586       | 591.914        | 1686.48   | 1        | -8.70403               | 4.95124                | -5.25621               | -2.81563               | 4.28255                | 3.79282                | 32.8554                | 40.4329                |
| MIR301A    | 0.204863          | -0.352392           | -2.83775             | 1 down vs 2          | 2.02209       | 1452.51        | 4309.92   | 1        | -2.27622               | 5.75721                | 2.31406                | 16.0122                | -35.4932               | -5.15895               | 49.8872                | 50.103                 |
| MIR429     | 0.266362          | -0.408637           | -2.44716             | 1 down vs 2          | 1.50145       | 243.414        | 972.716   | 1        | 2.26003                | 2.94372                | 34.4174                | -7.17221               | -5.00372               | 1.25739                | 6.13542                | -4.31098               |
| MIR548P    | 0.271816          | -0.0378126          | -26.4462             | 1 down vs 2          | 1.46387       | 337.525        | 1383.42   | 1        | -17.5486               | 3.58265                | 33.4811                | 21.8022                | -5.72013               | 6.53821                | 8.79704                | 12.2413                |
| MIR938     | 0.443994          | -0.479314           | -2.08631             | 1 down vs 2          | 0.671065      | 16.052         | 143.521   | 1        | 2.94449                | 3.08269                | -3.65416               | 3.05772                | -8.84631               | 2.27137                | 2.10089                | 6.08869                |
| MKI67      | 0.315379          | -0.128119           | -7.80524             | 1 down vs 2          | 1.19975       | 276.912        | 1384.85   | 1        | -18.084                | 9.18955                | 2.82146                | 7.42252                | 6.521                  | 37.4758                | 6.64466                | -2.2691                |
| MLLT1      | 0.778572          | -0.340032           | -2.9409              | 1 down vs 2          | 0.0865098     | 322.947        | 22398.4   | 1        | -2.45561               | -2.5971                | -2.3874                | 3.72362                | -11.2586               | -74.451                | 131.155                | -2.7507                |
| MMP25      | 0.0498544         | -0.534413           | -1.87121             | 1 down vs 2          | 5.99789       | 154.486        | 154.541   | 1        | -3.93851               | 4.07256                | 2.19955                | -8.24079               | 2.69511                | 5.19247                | 3.74766                | 14.366                 |
| MNS1       | 0.0329912         | -0.619174           | -1.61505             | 1 down vs 2          | 7.60023       | 193.13         | 152.467   | 1        | -10.4545               | 5.50635                | 3.63355                | 2.02967                | -3.21818               | 4.32408                | 13.8535                | 4.02268                |
| MOBP       | 0.479012          | 0.00562596          | -177.747             | 1 down vs 2          | 0.569522      | 1.77E+06       | 1.86E+07  | 1        | 2.76628                | -33.2389               | -2.22279               | -10.7764               | -8.47105               | -4836.4                | -2.49518               | -8.11592               |
| MOBP       | 0.476011          | 0.00724293          | -138.066             | 1 down vs 2          | 0.577695      | 542519         | 5.63E+06  | 1        | 3.10097                | -34.9739               | -2.25548               | -5.02221               | -9.85209               | -2664.81               | -2.53261               | -4.58216               |
| MOBP       | 0.469443          | 0.0211894           | -47.1934             | 1 down vs 2          | 0.595919      | 96741.4        | 974039    | 1        | 2.43006                | -32.8946               | -2.13358               | -8.85856               | -8.32335               | -1114.48               | -2.76389               | -8.04523               |
| MOGAT2     | 0.170621          | -0.470539           | -2.12522             | 1 down vs 2          | 2.42233       | 174.399        | 431.98    | 1        | -3.46923               | 20.8886                | -3.4866                | -3.76397               | -2.0247                | -1.02047               | 13.7336                | 2.67667                |
| MOGAT3     | 0.107971          | -0.734992           | -1.36056             | 1 down vs 2          | 3.56403       | 224.989        | 378.766   | 1        | 6.83996                | -21.9999               | 3.99455                | 3.93005                | 3.15149                | -2.30714               | -6.60162               | -4.65425               |
| MPPED1     | 0.477919          | -0.0042599          | -234.75              | 1 down vs 2          | 0.572489      | 134465         | 1.41E+06  | 1        | -3.52039               | 1328.43                | 2.40648                | 3.04161                | -2.92901               | 3.26378                | 3.71689                | -4.51799               |
| MRGPRF     | 0.47452           | -0.256436           | -3.89961             | 1 down vs 2          | 0.581792      | 2429.78        | 25058.2   | 1        | 2.26277                | 2.82895                | 2.35248                | -23.462                | 43.2408                | 5.78237                | 9.37843                | -163.598               |
| MS4A14     | 0.0744513         | -0.15286            | -6.54191             | 1 down vs 2          | 4.64983       | 329.763        | 425.516   | 1        | 4.47368                | 10.5865                | 15.3867                | -4.19511               | -5.55378               | 1.76115                | 25.6742                | 4.10807                |
| MS4A15     | 0.35207           | -0.541027           | -1.84834             | 1 down vs 2          | 1.01739       | 2430.68        | 14334.7   | 1        | -4.17898               | 3.33413                | 125.665                | 4.86851                | -38.6117               | -1.16496               | 3.05835                | -14.071                |
| MS4A6A     | 0.126358          | -0.182798           | -5.47053             | 1 down vs 2          | 3.14838       | 232.787        | 443.631   | 1        | 2.96943                | 13.3301                | 4.51223                | -5.40883               | -2.72666               | -1.24914               | 5.61755                | 24.8911                |
| MS4A7      | 0.0489805         | -0.348646           | -2.86824             | 1 down vs 2          | 6.06188       | 635.266        | 628.782   | 1        | 2.21502                | 13.8153                | 30.9562                | -14.1908               | -2.29951               | 3.11474                | 15.2026                | 5.15278                |
| MSH5       | 0.0517246         | -0.774431           | -1.29127             | 1 down vs 2          | 5.86592       | 314.316        | 321.501   | 1        | -14.2574               | 9.21464                | 2.1836                 | 2.76346                | -5.45832               | 2.2597                 | 4.79774                | 18.0276                |
| MSR1       | 0.290851          | -0.0877004          | -11.4025             | 1 down vs 2          | 1.34109       | 6047.75        | 27057.5   | 1        | -4.08349               | 13.2692                | 40.8001                | -5.66363               | -3.99045               | 2.86667                | 196.943                | 7.19097                |
| MSTN       | 0.991339          | 0.980933            | -1.01944             | 1 down vs 2          | 0.00012802    | 0.389723       | 18265.1   | 1        | -41.4415               | 3.14296                | -2.96354               | 115.461                | -3.65288               | 58.6164                | 65.1075                | -4.34608               |
| MSX2P1     | 0.732085          | 0.302853            | -3.30194             | 1 down vs 2          | 0.128685      | 47.4092        | 2210.48   | 1        | -5.15299               | 5.62734                | -20.3287               | 5.44098                | 6.26529                | 3.13622                | 3.80872                | 43.8206                |
| MTTP       | 0.354578          | -0.026193           | -38.1782             | 1 down vs 2          | 1.00602       | 1103.86        | 6583.53   | 1        | 7.84939                | 3.67351                | 5.17959                | -6.43632               | -3.27102               | 3.68288                | 95.4316                | 10.2544                |
| MUC12      | 0.348078          | -0.0675405          | -14.8059             | 1 down vs 2          | 1.03576       | 1155.52        | 6693.73   | 1        | -4.33368               | 4.15488                | -5.3335                | 2.61766                | -2.9958                | 20.6832                | 94.2905                | 2.47635                |
| MUC4       | 0.369508          | -0.247444           | -4.04131             | 1 down vs 2          | 0.9409        | 749.737        | 4780.97   | 1        | -3.87617               | 2.36041                | -2.07834               | -3.29517               | -4.72823               | 77.531                 | 5.69925                | -3.36249               |
| MUTYH      | 0.0505643         | -0.733367           | -1.36357             | 1 down vs 2          | 5.94702       | 107.697        | 108.656   | 1        | -3.25123               | 11.2153                | -2.26022               | -2.63622               | -3.73205               | 1.17238                | 4.74278                | 6.99127                |
| MYB        | 0.451072          | -0.0101091          | -98.9205             | 1 down vs 2          | 0.649411      | 385296         | 3.56E+06  | 1        | -8.04593               | 40.8504                | 4.34524                | 3.96039                | -9.52463               | 68.8373                | 2135.47                | -5.62874               |
| MYH1       | 0.304296          | -0.503847           | -1.98473             | 1 down vs 2          | 1.26146       | 29.7275        | 141.395   | 1        | -3.30932               | 3.7184                 | 2.50363                | 7.75614                | -8.44898               | 1.00915                | 2.74461                | 3.26289                |
| MYL1       | 0.567712          | -0.314468           | -3.17998             | 1 down vs 2          | 0.365303      | 12.6819        | 208.297   | 1        | -3.70952               | -2.84044               | -3.17962               | -6.03863               | 11.6147                | -1.54393               | 2.0475                 | -4.37615               |
| MYO1B      | 0.0121595         | -0.623437           | -1.60401             | 1 down vs 2          | 12.5601       | 295.526        | 141.173   | 1        | -3.46712               | 8.40299                | 4.53061                | -2.96444               | -8.03201               | 2.53498                | 16.9826                | 6.21503                |
| MYO1H      | 0.191648          | -0.388493           | -2.57405             | 1 down vs 2          | 2.16441       | 1172.51        | 3250.33   | 1        | -9.93853               | 2.82257                | 3.43271                | -8.02256               | -3.0292                | -4.0014                | 65.7709                | 22.0253                |
| NAALADL1   | 0.313684          | -0.0563487          | -17.7466             | 1 down vs 2          | 1.20897       | 11672.5        | 57929.6   | 1        | -3.46058               | 282.332                | 77.1201                | -4.41956               | -4.74628               | -1.81477               | 3.67113                | 12.1522                |
| NAT1       | 0.370408          | -0.0135888          | -73.5898             | 1 down vs 2          | 0.937107      | 1690.94        | 10826.6   | 1        | -2.26766               | 3.36624                | 12.0624                | -2.74884               | 3.80867                | 5.20938                | 5.11388                | 122.388                |
| NBPF10     | 0.27657           | -0.854346           | -1.17049             | 1 down vs 2          | 1.43202       | 44.2078        | 185.226   | 1        | -5.82149               | 11.6374                | -2.15932               | 3.58217                | -4.47208               | -2.71453               | 3.56059                | 2.76853                |
| NBPF9      | 0.484851          | -0.0437934          | -22.8345             | 1 down vs 2          | 0.553882      | 10593.3        | 114753    | 1        | -2.773                 | 374.754                | -4.07201               | -4.67185               | -2.016                 | -7.37505               | 7.33892                | -10.5897               |
| NBR2       | 0.121605          | -0.16193            | -6.1755              | 1 down vs 2          | 3.24742       | 145.761        | 269.311   | 1        | -3.16723               | 6.49695                | 5.61722                | 3.51594                | -4.035                 | 1.36729                | 20.8409                | 3.61875                |
| NCRNA00152 | 0.0252771         | -0.265875           | -3.76117             | 1 down vs 2          | 8.76265       | 318.987        | 218.418   | 1        | -4.55989               | 9.04486                | 17.5855                | -7.73468               | 4.07605                | 7.42527                | 2.5727                 | 14.8904                |
| NCRNA00173 | 0.107759          | -0.274869           | -3.6381              | 1 down vs 2          | 3.56939       | 2057.84        | 3459.15   | 1        | -6.10089               | 6.75375                | 3.68725                | -2.56505               | -12.7623               | 7.02969                | 69.4529                | 43.0066                |
| NECAB1     | 0.782342          | 0.710326            | -1.4078              | 1 down vs 2          | 0.0834934     | 129.002        | 9270.32   | 1        | -31.8147               | -6.23568               | -6.31912               | -11.4713               | -17.7332               | -113.383               | -2.70874               | -14.5253               |
| NGFR       | 0.261425          | -0.585661           | -1.70747             | 1 down vs 2          | 1.53648       | 623.024        | 2432.94   | 1        | -5.40047               | 4.14615                | 3.11239                | 2.09823                | -1.1936                | -2.22704               | 53.6414                |                        |
| NMU        | 0.225128          | -0.0691518          | -14.4609             | 1 down vs 2          | 1.82777       | 274097         | 899777    | 1        | -74.5063               | 948.357                | 19.2587                | 3.34806                | -3.0303                | 25.7263                | 796.902                | -2.18441               |
| NMUR2      | 0.813469          | -0.746325           | -1.3399              | 1 down vs 2          | 0.0607909     | 5.37106        | 530.118   | 1        | -12.5176               | -2.99445               | 2.76712                | 16.8177                | -6.47007               | 5.2382                 | 2.25433                | -2.4193                |
| NOL4       | 0.160569          | -0.235795           | -4.24097             | 1 down vs 2          | 2.56213       | 2112.96        | 4948.14   | 1        | -13.9888               | 25.456                 | 2.50257                | 2.12649                | -7.3533                | 26.567                 | 84.4763                | -3.18036               |
| NOX4       | 0.0192944         | -0.337729           | -2.96095             | 1 down vs 2          | 10.0552       | 1158.51        | 691.289   | 1        | -8.56389               | 39.6961                | 17.3891                | -7.8524                | -2.41028               | 4.49666                | 13.9368                | 17.389                 |

| Gene ID | p-value (1 vs. 2) | MeanRatio (1 vs. 2) | FoldChange (1 vs. 2) | FoldChange (1 vs. 2) | F(Gene Group) | SS(Gene Group) | SS(Error) | F(Error) | FoldChange (106 vs. n) | FoldChange (111 vs. n) | FoldChange (112 vs. n) | FoldChange (121 vs. n) | FoldChange (347 vs. n) | FoldChange (353 vs. n) | FoldChange (537 vs. n) | FoldChange (563 vs. n) |
|---------|-------------------|---------------------|----------------------|----------------------|---------------|----------------|-----------|----------|------------------------|------------------------|------------------------|------------------------|------------------------|------------------------|------------------------|------------------------|
| NPC1L1  | 0.261385          | -0.26138            | -3.82584             | 1 down vs 2          | 1.53676       | 11.6633        | 45.5371   | 1        | -2.69524               | 2.10511                | -2.03366               | 3.36857                | -2.22378               | 4.28049                | 3.01719                | 2.51716                |
| NPPA    | 0.55714           | 0.13803             | -7.24479             | 1 down vs 2          | 0.386244      | 129.006        | 2004.01   | 1        | -3.53538               | 6.40653                | 45.0515                | 12.8488                | -5.32861               | 2.15272                | 6.63075                | -12.1263               |
| NPY5R   | 0.43731           | -0.0303301          | -32.9705             | 1 down vs 2          | 0.692074      | 50327.4        | 436318    | 1        | -20.7963               | 8.36097                | 745.742                | 17.2749                | -10.947                | 58.1179                | 24.8268                | -41.9962               |
| NR4A3   | 0.0233405         | -0.392877           | -2.54533             | 1 down vs 2          | 9.13176       | 181.986        | 119.574   | 1        | -6.64021               | 7.49159                | 2.61475                | 3.19068                | -4.88697               | 13.3395                | 7.13972                | 4.77965                |
| NRP1    | 0.0167528         | -0.875439           | -1.14228             | 1 down vs 2          | 10.7802       | 168.627        | 93.8536   | 1        | -5.20764               | 3.30208                | 4.42913                | -4.76706               | -3.30559               | 1.60616                | 13.4265                | 2.51924                |
| NUCB2   | 0.0476446         | -0.785303           | -1.27339             | 1 down vs 2          | 6.16273       | 64.3557        | 62.6563   | 1        | -2.0256                | 2.39351                | 2.1604                 | -2.09112               | -3.61435               | -1.01642               | 3.22336                | 9.64697                |
| NUP210  | 0.208494          | -0.0996044          | -10.0397             | 1 down vs 2          | 1.98528       | 28.0717        | 84.8394   | 1        | -2.64318               | 7.09052                | 2.12277                | 4.24597                | -2.65426               | -1.13387               | 7.37715                | 2.13754                |
| NXT2    | 0.0202659         | -0.260431           | -3.8398              | 1 down vs 2          | 9.81116       | 71.7589        | 43.884    | 1        | -4.5444                | 7.56955                | 3.13644                | 2.96428                | -2.25458               | 4.40613                | 3.35145                | 6.0772                 |
| OCIAD2  | 0.00408093        | -0.885875           | -1.12883             | 1 down vs 2          | 20.2976       | 550.145        | 162.624   | 1        | -13.8049               | 7.15535                | 5.78152                | -3.60111               | -6.73296               | 4.59826                | 10.329                 | 17.5504                |
| ODF3L1  | 0.388356          | -0.267719           | -3.73526             | 1 down vs 2          | 0.864515      | 2355.55        | 16348.3   | 1        | 2.2138                 | -140.932               | -2.45419               | -2.82539               | 23.0671                | -1.07869               | 2.4341                 | 2.23535                |
| OPALIN  | 0.441749          | 0.0240985           | -41.4963             | 1 down vs 2          | 0.67806       | 1.06E+07       | 9.41E+07  | 1        | -7.58364               | -11100.6               | -406.127               | -42.5842               | -126.237               | -672.516               | -2.9436                | -18.0544               |
| OPALIN  | 0.516749          | 0.130304            | -7.67437             | 1 down vs 2          | 0.474294      | 178483         | 2.26E+06  | 1        | -9.01313               | -35.5824               | -35.2711               | -27.4583               | -102.207               | -1696.98               | -2.7413                | -3.20827               |
| OR2AG1  | 0.60752           | -0.542391           | -1.84369             | 1 down vs 2          | 0.293469      | 8.69808        | 177.833   | 1        | -3.06748               | 2.54798                | 2.30318                | 8.28479                | -7.48953               | 1.8524                 | 4.60563                | -4.32708               |
| OR4F17  | 0.40252           | -0.0343817          | -29.0852             | 1 down vs 2          | 0.811008      | 745.124        | 5512.58   | 1        | 9.2887                 | -10.3433               | 36.2289                | -3.9907                | -7.28584               | -2.561                 | 76.0307                | -2.99397               |
| OR4S1   | 0.148228          | -0.814128           | -1.22831             | 1 down vs 2          | 2.75162       | 56.3973        | 122.976   | 1        | -6.30786               | 2.35521                | -2.80782               | 2.51818                | -3.59403               | 1.91908                | 9.78553                | 3.86378                |
| OR8G2   | 0.449349          | -0.039626           | -25.2359             | 1 down vs 2          | 0.654627      | 16140.7        | 147937    | 1        | 12.0108                | 4.72485                | -3.07256               | -14.302                | -8.31805               | 7.36406                | 432.752                | 4.45549                |
| OR8K3   | 0.734435          | 0.539898            | -1.8522              | 1 down vs 2          | 0.126324      | 20.1932        | 959.112   | 1        | -2.58005               | -2.49839               | 26.3099                | 17.245                 | -3.11231               | 1.21613                | -4.37122               | 15.0066                |
| OSBPL6  | 0.186167          | -0.716249           | -1.39616             | 1 down vs 2          | 2.22763       | 328.206        | 884.004   | 1        | -7.74778               | 4.52892                | 5.49766                | -5.45085               | -3.36584               | 7.3252                 | 31.1216                | -9.9289                |
| OTP     | 0.474695          | -0.0168282          | -59.4242             | 1 down vs 2          | 0.581312      | 5759.72        | 59448.8   | 1        | -2.12282               | 2.27634                | 2.39999                | -3.98865               | 3.35971                | -2.47813               | 272.494                | -2.15706               |
| PAM     | 0.0861449         | 0.039362            | -3.71247             | 1 down vs 2          | 4.20584       | 406.753        | 580.269   | 1        | -2.88761               | 6.29366                | 6.21983                | -2.3554                | -4.25327               | 5.44323                | 3.08763                | 6.97334                |
| PANX2   | 0.417834          | -0.638416           | -1.56638             | 1 down vs 2          | 0.756584      | 601.502        | 4770.14   | 1        | -12.1315               | -6.41906               | 3.01579                | -2.9812                | -5.8245                | 1.19464                | 71.1838                | -14.3159               |
| PAPPA   | 0.0289862         | -0.877889           | -1.1391              | 1 down vs 2          | 8.15175       | 386.702        | 284.628   | 1        | -3.75559               | 5.90052                | 20.9935                | -6.55815               | -9.82714               | -1.19831               | 5.0557                 | 7.48594                |
| PARG    | 0.714875          | 0.0706997           | -14.1443             | 1 down vs 2          | 0.14674       | 5.56073        | 227.371   | 1        | 2.45542                | 10.8248                | -4.54936               | 5.26314                | -7.32551               | 1.68289                | 3.45019                | -2.1428                |
| PBRM1   | 0.201309          | -0.212113           | -4.71447             | 1 down vs 2          | 2.05905       | 554.089        | 1614.59   | 1        | -3.05906               | 2.01213                | 14.9283                | -3.6927                | -2.27297               | 1.97089                | 48.7649                | 3.2352                 |
| PBX1    | 0.0572299         | -0.600457           | -1.6654              | 1 down vs 2          | 5.51219       | 68.3842        | 74.4359   | 1        | -3.026                 | 4.2581                 | 2.30835                | 2.9336                 | -6.7049                | 1.05658                | 7.91564                | 3.32834                |
| PCDH12  | 0.142246          | -0.18141            | -5.51237             | 1 down vs 2          | 2.85161       | 991.24         | 2085.64   | 1        | -3.12708               | 38.079                 | 3.57681                | -3.46033               | -4.00442               | 2.70049                | 2.95086                | 50.003                 |
| PCDH18  | 0.0204818         | -0.363341           | -2.75224             | 1 down vs 2          | 9.75903       | 185.467        | 114.028   | 1        | -2.7145                | 5.60652                | 7.6328                 | -2.17719               | -3.06007               | 2.63055                | 16.2532                | 4.35215                |
| PCDH20  | 0.487954          | 0.0257818           | -38.787              | 1 down vs 2          | 0.545712      | 95373          | 1.05E+06  | 1        | -9.98128               | 2.93166                | -1147.04               | -2.44618               | -5.4782                | 8.59218                | 5.12659                | -27.1231               |
| PCDHAC1 | 0.216666          | -0.207318           | -4.8235              | 1 down vs 2          | 1.90571       | 908.697        | 2860.97   | 1        | -3.88213               | 6.81019                | 3.13564                | -2.12282               | -5.3359                | -5.72595               | 25.4621                | 61.4891                |
| PCDHGB2 | 0.370079          | -0.0457807          | -21.8433             | 1 down vs 2          | 0.938491      | 485.509        | 3103.98   | 1        | 6.44401                | -9.08321               | -5.79637               | -2.1478                | -2.18291               | -64.0227               | -2.29055               | 4.25721                |
| PCP4    | 0.281992          | -0.25002            | -3.99968             | 1 down vs 2          | 1.39668       | 51.4594        | 221.064   | 1        | -5.67478               | 6.97143                | 3.3527                 | 5.41495                | -2.88365               | 9.07786                | 7.80793                | -6.25507               |
| PCSK1   | 0.154456          | -0.328331           | -3.04571             | 1 down vs 2          | 2.65334       | 27550          | 62298.8   | 1        | -39.6585               | 130.671                | 32.0724                | -8.86335               | -41.3631               | -1.11376               | 291.811                | 2.83133                |
| PCSK5   | 0.0857065         | -0.653618           | -1.52995             | 1 down vs 2          | 4.22097       | 221.174        | 314.393   | 1        | -2.73                  | 2.14369                | 2.62584                | -4.42307               | -5.72575               | 2.20787                | 22.2793                | 3.58314                |
| PDGFC   | 0.00864778        | -0.67048            | -1.49147             | 1 down vs 2          | 14.6776       | 165.926        | 67.8283   | 1        | -4.60161               | 2.93784                | 2.44239                | -2.45385               | -4.27172               | 4.53816                | 12.4511                | 5.78741                |
| PDLIM7  | 0.00409421        | -0.448294           | -2.23068             | 1 down vs 2          | 20.2701       | 328.75         | 97.311    | 1        | -7.73707               | 3.84113                | 16.0294                | -2.50065               | -2.05816               | 9.23731                | 7.85408                | 8.75167                |
| PDLIM7  | 0.0179762         | -0.634968           | -1.57809             | 1 down vs 2          | 10.4141       | 464.098        | 267.387   | 1        | -10.2333               | 2.01492                | 5.06383                | -2.01009               | -6.06404               | 20.73                  | 14.1044                | 6.23817                |
| PDZD11  | 0.268994          | -0.655175           | -1.52631             | 1 down vs 2          | 1.48317       | 220.192        | 890.76    | 1        | -3.87609               | 4.50507                | 3.60949                | -2.30104               | -6.69156               | -5.1324                | 32.0944                | -2.34054               |
| PDZRN3  | 0.161337          | -0.0185475          | -53.9157             | 1 down vs 2          | 2.55103       | 260.65         | 613.048   | 1        | -5.32822               | 24.4333                | 4.00414                | 6.81022                | -2.1261                | 22.2036                | 9.60499                | -2.36755               |
| PDZRN4  | 0.467627          | -0.120987           | -8.26538             | 1 down vs 2          | 0.601039      | 1101.39        | 10994.9   | 1        | -2.12209               | 6.28515                | 2.54295                | 2.21769                | -7.94305               | 15.3564                | 110.797                | -26.8779               |
| PFKFB2  | 0.251608          | 0.197754            | -5.05678             | 1 down vs 2          | 1.60912       | 77.7473        | 289.9     | 1        | -5.04243               | 12.6345                | 3.16792                | 13.8373                | -4.03295               | 5.97248                | 116.673                | 6.67109                |
| PFTK1   | 0.160646          | -0.664254           | -1.50545             | 1 down vs 2          | 2.56102       | 538.418        | 1261.41   | 1        | -10.2993               | 3.90056                | 3.60567                | -2.53894               | -7.45236               | 5.80613                | 40.9377                | -3.33928               |
| PGBD2   | 0.387331          | -0.171716           | -5.82355             | 1 down vs 2          | 0.868514      | 41.7931        | 288.722   | 1        | -5.47627               | 15.1163                | 5.42656                | 7.02231                | -3.62173               | 1.32761                | 2.11425                | -3.83823               |
| PI15    | 0.22884           | -0.244372           | -4.09213             | 1 down vs 2          | 1.7949        | 4941.88        | 16519.7   | 1        | -38.1899               | 26.3233                | 26.1667                | 15.6142                | -7.67027               | -5.77451               | 148.458                | 11.1105                |
| PILRB   | 0.364418          | -0.254968           | -3.92206             | 1 down vs 2          | 0.962618      | 2847.72        | 17749.8   | 1        | -15.7665               | 149.708                | 2.10176                | -4.5297                | -3.45698               | -4.80517               | 5.61344                | 2.65107                |
| PKD2L1  | 0.0118162         | -0.968894           | -1.0321              | 1 down vs 2          | 12.7288       | 398.04         | 187.624   | 1        | -8.55191               | 8.97877                | 9.56826                | -6.47308               | -6.48487               | 4.74488                | 16.0718                | -2.36299               |
| PKLR    | 0.986222          | 0.95183             | -1.05061             | 1 down vs 2          | 0.00032404    | 0.0326367      | 604.313   | 1        | -14.0843               | 5.0519                 | 4.72679                | 17.121                 | 4.78416                | 2.38021                | 7.59111                | -6.05558               |
| PKMYT1  | 0.507018          | 0.405504            | -2.46607             | 1 down vs 2          | 0.497568      | 85.4083        | 1029.91   | 1        | 5.3398                 | 37.1206                | 12.6609                | 11.2627                | -2.79177               | -1.17399               | 5.04678                | 3.10937                |
| PLA2R1  | 0.303196          | -0.577204           | -1.73249             | 1 down vs 2          | 1.26777       | 335.78         | 1589.15   | 1        | -5.17699               | -2.68966               | 7.79221                | -12.7307               | 3.21541                | -1.25999               | 41.7411                | -3.15994               |
| PLCZ1   | 0.502809          | -0.0263741          | -37.916              | 1 down vs 2          | 0.507901      | 14.8694        | 175.657   | 1        | -3.58784               | -4.49865               | -3.51922               | 8.10081                | -4.29588               | 4.27784                | -7.78699               | -2.19161               |
| PLOD2   | 0.221882          | -0.257437           | -3.88444             | 1 down vs 2          | 1.85715       | 2894.72        | 9352.13   | 1        | -4.76377               | 3.16806                | 12.3973                | -14.2                  | -5.16913               | 1.519                  | 23.0506                | 116.103                |
| PMS2CL  | 0.208578          | -0.189695           | -5.27161             | 1 down vs 2          | 1.98444       | 438.687        | 1326.38   | 1        | -4.45317               | 8.97078                | -2.7781                | -6.87145               | 4.00785                | 8.44843                | 43.4741                | 6.17001                |
| PNLDC1  | 0.488882          | 0.0753234           | -13.2761             | 1 down vs 2          | 0.543288      | 12117.2        | 133821    | 1        | -19.6662               | 2.01609                | -30.6793               | -2.28294               | 2.30367                | 3.38208                | -412.766               | 3.35555                |

| Gene ID | p-value (1 vs. 2) | MeanRatio (1 vs. 2) | FoldChange (1 vs. 2) | FoldChange (1 vs. 2) | F(Gene Group) | SS(Gene Group) | SS(Error) | F(Error) | FoldChange (106 vs. n) | FoldChange (111 vs. n) | FoldChange (112 vs. n) | FoldChange (121 vs. n) | FoldChange (347 vs. n) | FoldChange (353 vs. n) | FoldChange (537 vs. n) | FoldChange (563 vs. n) |
|---------|-------------------|---------------------|----------------------|----------------------|---------------|----------------|-----------|----------|------------------------|------------------------|------------------------|------------------------|------------------------|------------------------|------------------------|------------------------|
| PODXL   | 0.0110408         | -0.85846            | -1.16488             | 1 down vs 2          | 13.1352       | 82.313         | 37.5995   | 1        | -2.44416               | 2.31232                | 2.04747                | -3.34246               | -3.39505               | 1.26908                | 8.84145                | 3.35553                |
| POLR3D  | 0.0926345         | -0.281904           | -3.54731             | 1 down vs 2          | 3.99351       | 220.906        | 331.898   | 1        | -2.48819               | 20.1802                | 2.44605                | 3.15557                | -7.82833               | 3.05306                | 14.1922                | 2.46529                |
| PPIL5   | 0.102527          | -0.763433           | -1.30987             | 1 down vs 2          | 3.70631       | 424.861        | 687.791   | 1        | -10.4605               | 30.9097                | 3.24578                | -2.66367               | -6.42625               | -1.19591               | 6.74326                | 2.97811                |
| PPP2R2C | 0.591329          | 0.300969            | -3.3226              | 1 down vs 2          | 0.321399      | 1356.48        | 25323.2   | 1        | -18.0713               | -2.72987               | -2.22373               | -4.12417               | -12.5463               | -9.48119               | 2.37729                | -180.331               |
| PRCP    | 0.0103867         | -0.673209           | -1.48542             | 1 down vs 2          | 13.5089       | 109.536        | 48.6507   | 1        | -2.34681               | 2.67463                | 2.65986                | -2.50394               | -4.37496               | 3.34841                | 10.5989                | 3.55832                |
| PRDM1   | 0.436078          | -0.0526698          | -18.9862             | 1 down vs 2          | 0.696007      | 71925.2        | 620038    | 1        | -9.94438               | 25.2176                | 7.31411                | -16.9844               | -2.47011               | 3.49406                | 890.113                | 4.14967                |
| PRKAR1A | 0.615741          | -0.541545           | -1.84657             | 1 down vs 2          | 0.279929      | 37.2754        | 798.96    | 1        | -3.88144               | -4.88218               | -2.61542               | -3.00151               | 2.1839                 | 26.7163                | 3.25872                | -8.01556               |
| PROS1   | 0.0028811         | -0.470371           | -2.12598             | 1 down vs 2          | 23.4246       | 296.96         | 76.0637   | 1        | -3.52476               | 9.92739                | 4.35895                | -5.61388               | -2.93903               | 3.7534                 | 11.9651                | 12.79                  |
| PRR22   | 0.105415          | -0.549802           | -1.81884             | 1 down vs 2          | 3.62957       | 138.883        | 229.585   | 1        | -9.05971               | 12.5159                | 2.0967                 | 4.03822                | -4.13807               | -1.3565                | 3.50816                | 11.002                 |
| PRRG4   | 0.379084          | 0.42841             | -2.33421             | 1 down vs 2          | 0.901317      | 64.0236        | 426.2     | 1        | 11.159                 | 5.47082                | 22.9323                | -2.06853               | 4.04864                | -1.71305               | 13.6366                | 10.7891                |
| PRSSL1  | 0.409994          | 0.0582802           | -17.1585             | 1 down vs 2          | 0.784019      | 352.942        | 2701.02   | 1        | 2.24807                | -4.30377               | -2.50292               | 2.30466                | -2.00548               | 58.0389                | 18.6556                | 2.95716                |
| PRX     | 0.983717          | 0.973706            | -1.027               | 1 down vs 2          | 0.00045256    | 0.192225       | 2548.52   | 1        | -5.06223               | 2.82224                | 2.17719                | 4.56683                | 36.0663                | 1.31524                | 48.034                 | 6.5371                 |
| PSCA    | 0.465693          | 0.00206566          | -484.106             | 1 down vs 2          | 0.60653       | 2673.12        | 26443.4   | 1        | -3.32576               | 3.5576                 | 3.81132                | 11.4353                | -7.87507               | 2.94485                | -3.74626               | 182.613                |
| PSKH1   | 0.502856          | -0.19699            | -5.0764              | 1 down vs 2          | 0.507785      | 631.209        | 7458.38   | 1        | -3.94148               | -2.30595               | -16.3425               | -8.69216               | 3.57504                | 1.44891                | 2.88047                | 90.9608                |
| PSMB8   | 0.115384          | -0.783757           | -1.27591             | 1 down vs 2          | 3.38546       | 28.1092        | 49.8175   | 1        | -2.04408               | 3.687                  | 2.96674                | -5.30029               | 2.2406                 | -1.89139               | 3.39543                | 2.69543                |
| PSPC1   | 0.114617          | -0.946864           | -1.05612             | 1 down vs 2          | 3.4032        | 363.789        | 641.377   | 1        | -15.3307               | 2.41596                | 2.08758                | -2.16222               | -2.83054               | -1.09045               | 4.94818                | 27.412                 |
| PTCD3   | 0.41701           | -0.41753            | -2.39504             | 1 down vs 2          | 0.759425      | 102.069        | 806.416   | 1        | -2.0898                | 3.4713                 | -6.17583               | -2.02217               | -2.40765               | 29.535                 | 2.6756                 | -3.48151               |
| PTGFRN  | 0.0201555         | -0.522964           | -1.91218             | 1 down vs 2          | 9.83809       | 303.345        | 185.002   | 1        | -4.11322               | 5.14792                | 3.43465                | -2.17833               | -6.81145               | 11.4346                | 18.5368                | 3.20484                |
| PTK7    | 0.0872001         | -0.173943           | -5.74901             | 1 down vs 2          | 4.16985       | 7055.05        | 10151.5   | 1        | -5.91818               | 55.2558                | 5.50593                | -2.00301               | -19.3454               | 75.4595                | 121.859                | 3.1794                 |
| PTPA3   | 0.043747          | -0.416282           | -2.40222             | 1 down vs 2          | 6.48028       | 166.81         | 154.447   | 1        | -2.40523               | 7.81615                | 2.34041                | -2.84085               | -3.07096               | 3.832                  | 17.042                 | 2.61716                |
| PTPN12  | 0.000849304       | -0.901872           | -1.1088              | 1 down vs 2          | 37.7835       | 113.549        | 18.0315   | 1        | -3.52331               | 3.52249                | 2.79935                | -3.30319               | -4.24422               | 1.70264                | 5.58069                | 6.8536                 |
| PTPN20A | 0.374456          | -0.468098           | -2.1363              | 1 down vs 2          | 0.920242      | 7382.14        | 48131.7   | 1        | -51.8054               | 228.534                | -2.67412               | -2.43968               | -5.7746                | 3.79754                | 33.0479                | -49.0049               |
| PTPN3   | 0.217864          | -0.260618           | -3.83703             | 1 down vs 2          | 1.89441       | 4342.56        | 13753.8   | 1        | -6.15289               | 11.3742                | 4.58938                | 2.87211                | -26.5672               | 33.0454                | 139.052                | 2.81819                |
| PTPRC   | 0.415247          | 0.289685            | -3.45203             | 1 down vs 2          | 0.765541      | 15.7875        | 123.736   | 1        | 4.71877                | 5.78707                | 6.21577                | -3.7527                | 2.58412                | -2.33004               | 8.8179                 | 2.8349                 |
| PTPRM   | 0.0473262         | -0.331046           | -3.02073             | 1 down vs 2          | 6.18734       | 142.511        | 138.196   | 1        | -3.24471               | 3.49951                | 4.61191                | 2.15133                | -5.4115                | 4.78097                | 15.7953                | 4.06146                |
| PWRN1   | 0.358814          | -0.179817           | -5.56121             | 1 down vs 2          | 0.987105      | 8023.81        | 48771.8   | 1        | -37.808                | 27.0829                | 2.08029                | 12.1345                | -4.23721               | 249.148                | 3.57477                | -4.65285               |
| PWWP2   | 0.0318091         | -0.947307           | -1.05562             | 1 down vs 2          | 7.75323       | 404.931        | 313.365   | 1        | -15.8778               | 4.46622                | 7.98085                | -2.95037               | -2.61889               | 2.34269                | 3.36471                | 19.5789                |
| RAPH1   | 0.0105149         | -0.423143           | -2.36327             | 1 down vs 2          | 13.4333       | 247.693        | 110.633   | 1        | -4.59778               | 5.28616                | 10.2178                | -3.45438               | -2.20001               | 1.7326                 | 15.4901                | 7.65436                |
| RARB    | 0.524282          | -0.113159           | -8.83714             | 1 down vs 2          | 0.456851      | 12897.1        | 169383    | 1        | -16.6477               | 5.7823                 | 2.53525                | -5.36408               | -3.28106               | 435.998                | 10.6009                | -82.389                |
| RARB    | 0.351911          | -0.295316           | -3.3862              | 1 down vs 2          | 1.01812       | 8566.93        | 50486.8   | 1        | -45.0553               | 4.20787                | 4.82102                | 2.17975                | -3.35667               | 250.422                | 3.54852                | -2.08017               |
| RASAL2  | 0.0213445         | -0.818261           | -1.2221              | 1 down vs 2          | 9.55791       | 330.786        | 207.652   | 1        | -7.80166               | 15.1395                | 3.43208                | -3.42769               | -6.70269               | 1.14417                | 14.7505                | 2.05844                |
| RBM19   | 0.49677           | 0.0278612           | -35.8922             | 1 down vs 2          | 0.523017      | 21565.6        | 247399    | 1        | 2.74706                | 554.907                | -1.18165               | 8.65548                | 3.7104                 | 4.00158                | 3.96931                |                        |
| RBMY1A1 | 0.00410226        | -0.54083            | -1.84901             | 1 down vs 2          | 20.2535       | 97.4227        | 28.8611   | 1        | -2.57064               | 2.63437                | 6.02432                | -2.70243               | -2.31719               | 3.09176                | 8.79255                | 2.84778                |
| RCCD1   | 0.247335          | -0.0953044          | -10.4927             | 1 down vs 2          | 1.64206       | 3176.67        | 11607.4   | 1        | -9.01178               | 19.9964                | 105.777                | 2.19361                | -3.92629               | 1.99616                | 81.0795                | -20.9518               |
| REEP1   | 0.177056          | -0.55751            | -1.79369             | 1 down vs 2          | 2.3388        | 345.257        | 885.727   | 1        | -10.1633               | 7.19103                | 2.74903                | 2.22983                | -6.63835               | 4.95402                | 32.8943                | -4.22621               |
| RERG    | 0.466912          | -0.0816893          | -12.2415             | 1 down vs 2          | 0.603064      | 4555.31        | 45321.7   | 1        | -2.86417               | -3.86327               | 3.89742                | -2.93283               | -5.37015               | 5.02127                | 235.545                | -12.7625               |
| RFC3    | 0.0750273         | -0.480053           | -2.0831              | 1 down vs 2          | 4.62578       | 1610.06        | 2088.37   | 1        | -35.4561               | 43.2615                | 6.26034                | 3.05813                | 3.88432                | 27.4676                | 19.0793                | 2.92612                |
| RFPL3S  | 0.142671          | -0.108724           | -9.19763             | 1 down vs 2          | 2.84432       | 100.048        | 211.049   | 1        | -2.17067               | 15.7763                | 2.3828                 | 4.81805                | -4.79633               | 1.88156                | 10.7728                | 2.1286                 |
| RFWD2   | 0.287458          | -0.253831           | -3.93963             | 1 down vs 2          | 1.36208       | 12.4473        | 54.8308   | 1        | -2.42603               | 3.89358                | 2.43556                | 3.78308                | -2.92187               | -2.4831                | 3.44326                | 2.98538                |
| RFX2    | 0.349746          | 0.0174556           | -57.2883             | 1 down vs 2          | 1.02805       | 1585.75        | 9254.96   | 1        | 3.00051                | -3.66848               | 2.51387                | 4.70613                | -6.15668               | 35.0495                | 110.945                | 3.15099                |
| RFX3    | 0.333401          | -0.28454            | -3.51445             | 1 down vs 2          | 1.10626       | 5273.16        | 28600     | 1        | -2.53702               | 189.807                | 5.75438                | 3.81546                | -36.5197               | 2.30446                | 10.5895                | -2.03266               |
| RGPD1   | 0.272772          | -0.523557           | -1.91001             | 1 down vs 2          | 1.4574        | 84.8913        | 349.491   | 1        | -7.13484               | 3.0175                 | 4.93086                | 2.64036                | -2.44229               | -8.48122               | 15.6746                | 6.94046                |
| RGS17   | 0.0428797         | -0.606847           | -1.64786             | 1 down vs 2          | 6.55617       | 468.608        | 428.856   | 1        | -8.54339               | 6.75669                | 2.59689                | -4.57613               | -4.79192               | 3.32977                | 27.5535                | 8.95574                |
| RGS22   | 0.309545          | -0.0157726          | -63.4011             | 1 down vs 2          | 1.23181       | 17664.6        | 86042     | 1        | -4.7616                | 352.609                | 22.2252                | 2.91886                | -2.67873               | 27.2022                | 78.0523                | -2.3121                |
| RGS9    | 0.0852084         | 0.183403            | -5.45246             | 1 down vs 2          | 4.23829       | 430.731        | 609.771   | 1        | 4.28059                | 12.852                 | 13.1738                | 11.9515                | -6.01979               | 28.8744                | 30.7595                | 7.14389                |
| RNASL1  | 0.000238085       | -0.943247           | -1.06017             | 1 down vs 2          | 60.4687       | 123.539        | 12.2582   | 1        | -4.69661               | 5.89912                | 4.37835                | -2.16941               | -4.95406               | 2.11291                | 4.59807                | 3.897                  |
| RNF150  | 0.103544          | -0.216171           | -4.62596             | 1 down vs 2          | 3.67897       | 144.602        | 235.83    | 1        | -2.04119               | 2.11117                | 2.08265                | 2.19185                | -4.83352               | 10.742                 | 18.4352                | 2.73351                |
| RNF183  | 0.530634          | -0.0862367          | -11.596              | 1 down vs 2          | 0.442519      | 870.811        | 11807.1   | 1        | -4.58669               | 4.84413                | -116.771               | 4.5036                 | 5.21584                | 4.68637                | 2.96758                | 5.07403                |
| RNF19A  | 0.237157          | -0.378668           | -2.64083             | 1 down vs 2          | 1.72401       | 1031.77        | 3590.83   | 1        | 6.96121                | 67.7108                | 5.93286                | -6.21471               | -20.0756               | 1.33015                | 4.86106                | 5.24002                |
| RNFT1   | 0.0846944         | -0.99637            | -1.00364             | 1 down vs 2          | 4.25631       | 671.151        | 946.103   | 1        | -23.2488               | 14.4552                | 3.26259                | -2.57171               | -2.50713               | 3.51998                | 29.4354                | -3.28845               |
| ROR2    | 0.885819          | 0.855435            | -1.169               | 1 down vs 2          | 0.0224448     | 1189.35        | 317939    | 1        | 5.58017                | 540.761                | 52.8491                | 437.081                | 4.43169                | 23.5138                | 219.77                 | 34.1892                |
| RORB    | 0.178935          | -0.519446           | -1.92513             | 1 down vs 2          | 2.31521       | 704.314        | 1825.27   | 1        | -2.26208               | 2.24565                | 9.89104                | -2.20039               | -15.4149               | 13.7792                | 46.4391                | -8.57752               |

| Gene ID    | p-value (1 vs. 2) | MeanRatio (1 vs. 2) | FoldChange (1 vs. 2) | FoldChange (1 vs. 2) | F(Gene Group) | SS(Gene Group) | SS(Error) | F(Error) | FoldChange (106 vs. n) | FoldChange (111 vs. n) | FoldChange (112 vs. n) | FoldChange (121 vs. n) | FoldChange (347 vs. n) | FoldChange (353 vs. n) | FoldChange (537 vs. n) | FoldChange (563 vs. n) |
|------------|-------------------|---------------------|----------------------|----------------------|---------------|----------------|-----------|----------|------------------------|------------------------|------------------------|------------------------|------------------------|------------------------|------------------------|------------------------|
| RPESP      | 0.764128          | 0.600283            | -1.66588             | 1 down vs 2          | 0.0986165     | 4202.54        | 255690    | 1        | -27.3451               | 23.6203                | 21.0199                | 238.543                | 2.09707                | 1.43179                | 14.9893                | 531.145                |
| RPL13AP3   | 0.35299           | -0.0846323          | -11.8158             | 1 down vs 2          | 1.01321       | 195.848        | 1159.77   | 1        | 2.2484                 | 2.3035                 | 2.45129                | 2.69169                | -2.54769               | 3.96859                | -27.2558               | -28.5812               |
| RPRML      | 0.483886          | 0.00552696          | -180.931             | 1 down vs 2          | 0.556444      | 1.14E+08       | 1.23E+09  | 1        | -80.0333               | -4.20937               | -4.03025               | -8.04305               | -41.8152               | -1.18963               | 5.33283                | -39165                 |
| RPS27L     | 0.000773917       | -0.848295           | -1.17884             | 1 down vs 2          | 39.1352       | 82.0237        | 12.5754   | 1        | -2.85462               | 5.60121                | 2.18194                | -3.28947               | -2.96271               | 1.57599                | 3.40809                | 5.12514                |
| RSHL1      | 0.406249          | -0.455252           | -2.19659             | 1 down vs 2          | 0.797438      | 281.574        | 2118.59   | 1        | -17.2973               | -2.00029               | 46.3606                | 3.265                  | 2.53143                | 1.48081                | -6.25552               | 2.51884                |
| RSHL3      | 0.690918          | 0.0979031           | -10.2142             | 1 down vs 2          | 0.174213      | 235.225        | 8101.32   | 1        | -3.01819               | -3.57427               | 4.12888                | 8.7378                 | -2.07286               | 3.06591                | 88.5546                | -30.0942               |
| RUNX1      | 0.361563          | -0.124363           | -8.04095             | 1 down vs 2          | 0.975019      | 10139.7        | 62396.7   | 1        | -2.62382               | 287.464                | 9.35158                | -24.0258               | 2.24804                | 1.49053                | 3.0232                 | 25.6906                |
| S100A3     | 0.225261          | 0.0308655           | -32.3986             | 1 down vs 2          | 1.82657       | 522.637        | 1716.78   | 1        | 18.2644                | 34.121                 | 32.1742                | 3.48918                | -20.1584               | -1.29688               | 14.096                 | 7.04178                |
| S100A4     | 0.087914          | -0.433784           | -2.3053              | 1 down vs 2          | 4.14584       | 1092.86        | 1581.62   | 1        | 2.88813                | 2.4733                 | 8.24673                | -22.1823               | -2.61835               | 2.25496                | 31.3091                | 39.9073                |
| SASH3      | 0.407159          | -0.0824857          | -12.1233             | 1 down vs 2          | 0.79416       | 2018.23        | 15248     | 1        | 2.85035                | 140.224                | 2.46338                | -7.55019               | -2.80018               | -3.34889               | 2.08327                | 10.1201                |
| SCARA3     | 0.104696          | 0.10949             | -9.13329             | 1 down vs 2          | 3.64842       | 123.159        | 202.542   | 1        | 3.03997                | 10.2066                | 2.93351                | 2.39831                | -2.44885               | 9.0621                 | 19.7836                | 3.51972                |
| SCARA3     | 0.0955245         | 0.0747547           | -13.3771             | 1 down vs 2          | 3.9054        | 129.974        | 199.683   | 1        | 2.38462                | 5.18331                | 2.40097                | 2.04888                | -2.41546               | 8.0131                 | 20.4009                | 9.16091                |
| SCN2A      | 0.0719138         | -0.830955           | -1.20343             | 1 down vs 2          | 4.75888       | 437.171        | 551.185   | 1        | -12.2758               | 15.5572                | -4.19454               | -3.30231               | -5.21149               | 13.1853                | 20.2735                | -3.12325               |
| SCN9A      | 0.102871          | 0.0255746           | -39.1012             | 1 down vs 2          | 3.69702       | 211.742        | 343.643   | 1        | 2.25625                | 2.95462                | 6.05761                | 2.04079                | -3.46031               | 9.7528                 | 26.1662                | 9.59741                |
| SDR16C5    | 0.465145          | -0.404662           | -2.4712              | 1 down vs 2          | 0.608095      | 199.926        | 1972.65   | 1        | -6.63187               | 2.61966                | 3.34958                | 2.80442                | -5.0969                | -3.20487               | 45.1518                | -11.1598               |
| SDR9C7     | 0.368747          | -0.192067           | -5.20651             | 1 down vs 2          | 0.944116      | 322.027        | 2046.53   | 1        | -2.86938               | 8.26315                | -3.80594               | 11.2364                | -2.03242               | -1.78827               | -46.3411               | 3.69797                |
| SEMA6C     | 0.225151          | -0.149341           | -6.69608             | 1 down vs 2          | 1.82756       | 488.833        | 1604.87   | 1        | -7.63644               | 5.56615                | 2.86363                | 4.06021                | -2.71784               | 10.6771                | 48.6122                | 2.52355                |
| SERPINI2   | 0.0519829         | -0.162586           | -6.15061             | 1 down vs 2          | 5.8482        | 414.193        | 424.944   | 1        | 4.08089                | 4.96458                | 11.9517                | 3.2834                 | -13.5999               | 14.7056                | 24.4361                | 7.86332                |
| SH2D5      | 0.0890075         | -0.923157           | -1.08324             | 1 down vs 2          | 4.10957       | 462.006        | 674.532   | 1        | -15.4471               | -2.61198               | 2.65402                | -2.82126               | -4.33668               | 28.1169                | 2.57596                | 10.0762                |
| SH2D6      | 0.303229          | -0.108921           | -9.181               | 1 down vs 2          | 1.26758       | 120.792        | 571.761   | 1        | -3.01742               | 4.2021                 | 5.20349                | -2.05616               | 2.70848                | 1.26466                | -2.12198               | 27.6417                |
| SHC3       | 0.130746          | -0.647904           | -1.54344             | 1 down vs 2          | 3.06143       | 851.035        | 1667.92   | 1        | -19.4492               | 4.78439                | 2.13524                | -2.4351                | -3.24457               | 6.93682                | 47.2357                | 3.5493                 |
| SHF        | 0.395901          | -0.0790181          | -12.6553             | 1 down vs 2          | 0.83562       | 16592.7        | 119141    | 1        | -9.31088               | 17.8831                | 14.9851                | -2.44991               | -8.9062                | 5.02445                | 395.651                | 2.36885                |
| SIK1       | 0.0507209         | -0.349007           | -2.86527             | 1 down vs 2          | 5.93593       | 170.268        | 172.106   | 1        | -7.57384               | 8.51146                | 2.78565                | 5.55537                | -5.3777                | 2.74183                | 12.7059                | 8.57525                |
| SIKE       | 0.226099          | -0.572249           | -1.89664             | 1 down vs 2          | 1.81909       | 970.348        | 3200.55   | 1        | -18.3468               | 10.8107                | 62.6342                | -2.50345               | -2.71057               | -2.2546                | 8.51162                | -5.22472               |
| SIX6       | 0.51987           | 0.0641587           | -15.5863             | 1 down vs 2          | 0.467008      | 731.019        | 9391.95   | 1        | -22.6434               | 2.13424                | 10.5042                | 16.1204                | 2.46195                | -7.79901               | -7.30234               | -103.032               |
| SLAMF6     | 0.890313          | 0.394926            | -2.53212             | 1 down vs 2          | 0.0206988     | 0.908311       | 263.294   | 1        | 12.2255                | -2.9228                | 2.03911                | -7.86475               | -2.99791               | -1.35861               | 2.63163                | 5.36213                |
| SLAMF8     | 0.187495          | 0.127978            | -7.81386             | 1 down vs 2          | 2.21208       | 198.838        | 539.325   | 1        | 8.9271                 | 14.4825                | 13.1801                | -2.36274               | -2.03041               | -1.68179               | 6.0178                 | 27.0475                |
| SLC13A3    | 0.655283          | 0.226065            | -4.42351             | 1 down vs 2          | 0.220439      | 507.039        | 13800.8   | 1        | 6.24871                | 125.545                | -2.31283               | -2.35483               | 10.5163                | -11.1453               | 2.73178                | -8.57932               |
| SLC17A1    | 0.243213          | -0.492462           | -2.03061             | 1 down vs 2          | 1.67465       | 9009.24        | 32278.7   | 1        | -28.3438               | -3.29224               | -25.069                | -5.28067               | -34.9929               | 93.0353                | 181.874                | -14.3225               |
| SLC17A7    | 0.655193          | 0.585155            | -1.70895             | 1 down vs 2          | 0.220563      | 4371.72        | 118924    | 1        | -165.615               | -290.938               | -4.72999               | -12.0669               | -26.6478               | -9.4186                | 18.4058                | -295.301               |
| SLC26A10   | 0.326429          | -0.28771            | -3.47572             | 1 down vs 2          | 1.14148       | 9578.38        | 50347.3   | 1        | -45.177                | 6.26092                | 10.2818                | 3.04085                | -5.77136               | 2.65859                | 253.49                 | 4.83065                |
| SLC29A1    | 0.106084          | -0.61715            | -1.62035             | 1 down vs 2          | 3.61221       | 701.53         | 1165.26   | 1        | -19.61                 | 37.3093                | 2.512                  | 2.23705                | -4.77248               | 2.16269                | 14.8256                | 2.99603                |
| SLC2A10    | 0.154854          | -0.137745           | -7.25977             | 1 down vs 2          | 2.64725       | 1846.34        | 4184.74   | 1        | -4.05776               | 2.66085                | 3.01221                | -2.44785               | -4.89187               | 13.7136                | 39.7953                | 78.7232                |
| SLC30A4    | 0.364769          | 0.0845327           | -11.8297             | 1 down vs 2          | 0.961106      | 94.5644        | 590.347   | 1        | -4.36457               | -24.4463               | -3.83168               | 11.6863                | -9.28901               | -4.20694               | -2.53381               | -3.76864               |
| SLC35E1    | 0.00776806        | -0.813228           | -1.22967             | 1 down vs 2          | 15.3961       | 144.789        | 56.4256   | 1        | -3.47148               | 5.17757                | 2.10213                | -2.11846               | -6.23363               | 2.33706                | 10.592                 | 4.023                  |
| SLC47A2    | 0.673548          | 0.570689            | -1.75227             | 1 down vs 2          | 0.195916      | 3472.41        | 106344    | 1        | 167.011                | 5.59248                | 67.5106                | 8.19499                | -3.58733               | 54.6455                | 11.9121                | 361.542                |
| SLCO1A2    | 0.20554           | -0.278433           | -3.59153             | 1 down vs 2          | 2.01516       | 1897.53        | 5649.75   | 1        | 2.01105                | 22.0296                | 2.39249                | -17.9822               | -4.81417               | 2.32074                | 89.2884                | 8.38739                |
| SLN        | 0.00475974        | -0.383762           | -2.60578             | 1 down vs 2          | 19.0277       | 1505.69        | 474.789   | 1        | -11.6148               | 9.31171                | 30.3493                | -3.98102               | -7.98125               | 22.4545                | 9.6665                 | 30.6124                |
| SLPI       | 0.0748888         | 0.295946            | -3.379               | 1 down vs 2          | 4.63154       | 229.025        | 296.694   | 1        | 5.47904                | 27.4747                | 3.29505                | 3.81326                | 4.64463                | 16.1513                | 14.6517                | 16.9154                |
| SMAGP      | 0.0275333         | -0.487839           | -2.04986             | 1 down vs 2          | 8.37781       | 345.763        | 247.627   | 1        | -6.24905               | 7.44651                | 7.86684                | -4.56329               | -2.54532               | 2.45308                | 2.2466                 | 5.40302                |
| SMYD2      | 0.229329          | -0.0699077          | -14.3046             | 1 down vs 2          | 1.79063       | 4407.02        | 14766.9   | 1        | -5.45335               | 135.148                | 2.75436                | 2.06497                | -6.11486               | 4.67514                | 81.8104                | 2.1784                 |
| SMYD3      | 0.0190121         | -0.53681            | -1.86286             | 1 down vs 2          | 10.1293       | 175.999        | 104.252   | 1        | -7.93376               | 8.45466                | 4.45451                | 2.20969                | -4.42849               | 2.92291                | 11.5152                | 4.17402                |
| SNAI2      | 0.489954          | -0.845297           | -1.18302             | 1 down vs 2          | 0.540498      | 11.1636        | 123.926   | 1        | -4.34216               | 4.26037                | 2.21434                | 6.44529                | -5.45638               | 1.16487                | 2.75011                | -3.77811               |
| SNAI2      | 0.320499          | 0.0775503           | -12.8948             | 1 down vs 2          | 1.17236       | 1975.71        | 10111.4   | 1        | -2.70888               | 122.606                | 25.7828                | 13.0672                | -2.17134               | 4.60303                | 20.4477                | 2.50827                |
| SNORD114-3 | 0.770878          | 0.503775            | -1.98501             | 1 down vs 2          | 0.0928493     | 32.9481        | 2129.14   | 1        | -5.63412               | -6.21954               | -2.36697               | -2.09169               | -5.04132               | -47.7885               | 12.1083                | 2.02847                |
| SNORD1A    | 0.529057          | 0.194501            | -5.14136             | 1 down vs 2          | 0.446044      | 432.996        | 5824.48   | 1        | -8.25964               | 8.22379                | -2.78028               | 2.24442                | 17.0235                | 1.35819                | 84.8349                | 2.69261                |
| SNRPE      | 0.977476          | 0.918923            | -1.08823             | 1 down vs 2          | 0.0008661     | 0.216593       | 1500.47   | 1        | 16.9958                | 2.15215                | -20.4895               | 3.09679                | -8.53622               | 27.2817                | 9.21758                | 2.79807                |
| SOAT1      | 0.0324034         | -0.291388           | -3.43185             | 1 down vs 2          | 7.67536       | 221.715        | 173.319   | 1        | -2.45357               | 16.1734                | 10.5186                | -2.75707               | -2.1503                | -1.97858               | 9.10371                | 8.28558                |
| SOAT2      | 0.632246          | 0.177078            | -5.64723             | 1 down vs 2          | 0.253989      | 14.9205        | 352.467   | 1        | -12.1529               | 3.10298                | -3.54965               | 3.87233                | 10.1016                | 8.9435                 | 6.32536                | 2.31745                |
| SOC52      | 0.100186          | -0.689357           | -1.45063             | 1 down vs 2          | 3.77075       | 994.894        | 1583.07   | 1        | -12.375                | 3.13934                | 3.73358                | -12.8118               | -3.01209               | 45.4163                | 18.8696                | -2.98206               |
| SOC53      | 0.13568           | -0.295898           | -3.37954             | 1 down vs 2          | 2.96837       | 46.9025        | 94.8045   | 1        | 2.05989                | 2.78773                | 5.2161                 | -2.87923               | -2.60668               | -3.32218               | 8.0295                 | 6.58616                |
| SOX12      | 0.155808          | -0.0872107          | -11.4665             | 1 down vs 2          | 2.63273       | 130.505        | 297.422   | 1        | -2.73064               | 11.948                 | -2.65321               | 2.85193                | -2.12895               | 6.42428                | 19.2463                | 3.40263                |

| Gene ID  | p-value (1 vs. 2) | MeanRatio (1 vs. 2) | FoldChange (1 vs. 2) | FoldChange (1 vs. 2) | F(Gene Group) | SS(Gene Group) | SS(Error) | F(Error) | FoldChange (106 vs. n) | FoldChange (111 vs. n) | FoldChange (112 vs. n) | FoldChange (121 vs. n) | FoldChange (347 vs. n) | FoldChange (353 vs. n) | FoldChange (537 vs. n) | FoldChange (563 vs. n) |
|----------|-------------------|---------------------|----------------------|----------------------|---------------|----------------|-----------|----------|------------------------|------------------------|------------------------|------------------------|------------------------|------------------------|------------------------|------------------------|
| SOX18    | 0.00102381        | -0.764151           | -1.30864             | 1 down vs 2          | 35.1898       | 111.684        | 19.0426   | 1        | -2.18073               | 5.71526                | 3.53555                | -4.5163                | -3.33203               | 1.75343                | 6.967                  | 3.90283                |
| SPINK8   | 0.0551551         | -0.456958           | -2.18838             | 1 down vs 2          | 5.63986       | 504.699        | 536.927   | 1        | -11.6529               | 13.495                 | 3.65375                | -5.87279               | 2.08857                | 5.5626                 | 28.7359                | 4.85668                |
| SPO11    | 0.464261          | -0.011543           | -86.6324             | 1 down vs 2          | 0.610624      | 2837.32        | 27879.5   | 1        | -2.0105                | 187.2                  | 5.44055                | 4.17103                | -3.49224               | 5.14202                | -10.6856               | 5.18513                |
| SPOCD1   | 0.454834          | -0.0460234          | -21.7281             | 1 down vs 2          | 0.638143      | 1.12E+06       | 1.05E+07  | 1        | 144.712                | 27.8044                | 11.9355                | -244.075               | -2.51875               | 1.71963                | 22.1621                | 3625.87                |
| SPPL2A   | 0.00558161        | -0.838562           | -1.19252             | 1 down vs 2          | 17.7805       | 140.719        | 47.4854   | 1        | -4.01072               | 6.48024                | 2.62144                | -3.91164               | -3.93135               | 1.14706                | 9.7955                 | 3.51535                |
| SPRY4    | 0.25774           | -0.297873           | -3.35714             | 1 down vs 2          | 1.56326       | 11609.3        | 44557.8   | 1        | -4.08341               | 43.6178                | 2.06816                | -46.5365               | -3.55792               | 243.909                | 17.4856                | -3.94307               |
| SPSB1    | 0.505104          | 0.365407            | -2.73667             | 1 down vs 2          | 0.502247      | 44.3419        | 529.723   | 1        | 3.10131                | 3.41488                | 2.48598                | 8.0967                 | -2.79742               | 1.73897                | 3.66579                | 27.0105                |
| SRPX     | 0.177903          | -0.310156           | -3.22418             | 1 down vs 2          | 2.32812       | 389.51         | 1003.84   | 1        | 3.07592                | 3.88459                | 2.88538                | -4.19813               | -9.11396               | 7.7567                 | 2.47864                | 38.0001                |
| SSB      | 0.357638          | -0.94251            | -1.061               | 1 down vs 2          | 0.992318      | 134.652        | 814.166   | 1        | -2.137                 | 4.15501                | -2.37698               | 4.62831                | 9.84399                | -1.57881               | 5.86823                | -27.8803               |
| SSX1     | 0.34162           | -0.0363277          | -27.5272             | 1 down vs 2          | 1.06619       | 6687.39        | 37633.2   | 1        | -2.16625               | 228.278                | 16.0813                | -2.0884                | -2.02578               | 3.94022                | 42.9344                | -3.09593               |
| ST5      | 0.0322518         | -0.564245           | -1.77228             | 1 down vs 2          | 7.69505       | 150.09         | 117.028   | 1        | -2.62212               | 3.83463                | 2.32414                | -2.08249               | -4.97726               | 2.418                  | 14.9846                | 5.03691                |
| STAC3    | 0.470345          | 0.157693            | -6.34144             | 1 down vs 2          | 0.593389      | 206.764        | 2090.67   | 1        | 4.33894                | 4.5506                 | 4.46273                | -3.12066               | 4.67964                | 9.90353                | 5.21699                | -7.8512                |
| SULF2    | 0.0190962         | -0.10667            | -9.37468             | 1 down vs 2          | 10.107        | 126.868        | 75.3144   | 1        | -2.34963               | 6.10537                | 5.58486                | 2.54965                | -2.57862               | 9.92179                | 12.6198                | 2.93252                |
| SUSD1    | 0.13505           | -0.162134           | -6.16774             | 1 down vs 2          | 2.97999       | 1725.53        | 3474.23   | 1        | -3.93698               | 67.1407                | 3.62963                | 2.89523                | -11.6552               | 5.51351                | 46.5227                | 7.71265                |
| SVEP1    | 0.172255          | -0.222998           | -4.48434             | 1 down vs 2          | 2.4007        | 464.068        | 1159.83   | 1        | -3.55121               | 40.8503                | 3.73042                | 4.15205                | -9.20656               | 1.94768                | 3.76763                | 14.0222                |
| SVIL     | 0.014052          | -0.398605           | -2.50875             | 1 down vs 2          | 11.7327       | 199.957        | 102.257   | 1        | -2.65268               | 5.14433                | 5.78198                | -2.46193               | -3.7149                | 1.35111                | 10.2434                | 14.3976                |
| TACC3    | 0.46138           | -0.002156           | -463.813             | 1 down vs 2          | 0.618928      | 317997         | 3.08E+06  | 1        | -4.82155               | 55.8824                | 2.17557                | 4.40774                | -2.24418               | 7.54387                | 1980.85                | 8.23407                |
| TAL2     | 0.0626842         | -0.468521           | -2.13438             | 1 down vs 2          | 5.20452       | 664.73         | 766.33    | 1        | -4.8544                | 21.4907                | 2.57853                | -3.55956               | -9.60759               | 2.15759                | 32.6768                | 5.20432                |
| TAP2     | 0.000101354       | -0.871533           | -1.1474              | 1 down vs 2          | 82.0966       | 80.7429        | 5.90106   | 1        | -2.03776               | 4.44721                | 3.18786                | -2.57746               | -4.55245               | 2.71084                | 4.20991                | 2.97588                |
| TBC1D16  | 0.00294855        | -0.39085            | -1.19177             | 1 down vs 2          | 23.2052       | 116.318        | 30.0755   | 1        | -3.54013               | 2.05144                | 3.10691                | -3.46917               | -3.77143               | 2.6827                 | 8.85614                | 4.71648                |
| TBC1D19  | 0.00408029        | -0.89142            | -1.12181             | 1 down vs 2          | 20.2989       | 207.595        | 61.3614   | 1        | -7.17844               | 6.16021                | 5.16489                | -2.47404               | -5.22479               | 1.86571                | 11.1779                | 3.44696                |
| TBKBP1   | 0.0607723         | -0.421003           | -2.37528             | 1 down vs 2          | 5.30809       | 116.353        | 131.519   | 1        | -2.85688               | 4.51494                | 2.10556                | 2.28552                | -6.43026               | 4.45337                | 13.9621                | 2.68206                |
| TCTEX1D1 | 0.476961          | 0.0083074           | -120.375             | 1 down vs 2          | 0.575098      | 294463         | 3.07E+06  | 1        | -5.43314               | 3.52279                | 9.29683                | 19.4174                | -4.02507               | 20.1789                | 1967.15                | -2.09286               |
| TEKT2    | 0.329263          | -0.0406603          | -24.594              | 1 down vs 2          | 1.12702       | 2710.76        | 142.501   | 1        | -2.45189               | 138.378                | 3.05365                | 2.47189                | -4.47685               | 1.58439                | 43.6432                | -3.97285               |
| THAP4    | 0.932307          | 0.712223            | -1.40405             | 1 down vs 2          | 0.00784451    | 2.35227        | 1799.18   | 1        | -6.31018               | -5.71393               | 18.9592                | -4.37645               | 2.37043                | -9.51833               | 11.664                 | -34.8516               |
| THEM4    | 0.0608732         | -0.587476           | -1.7022              | 1 down vs 2          | 5.30252       | 301.232        | 340.856   | 1        | -11.2153               | 8.81875                | 5.83801                | 5.09604                | -7.9527                | 1.24079                | 4.64211                | 19.3824                |
| THSD1    | 0.537246          | -0.149593           | -6.68482             | 1 down vs 2          | 0.427956      | 72.0335        | 1009.92   | 1        | -3.21069               | 4.69738                | 27.2533                | -5.14888               | 5.93991                | 2.42662                | 8.26761                | -15.6866               |
| THYN1    | 0.188916          | -0.500495           | -1.99802             | 1 down vs 2          | 2.19559       | 1190.03        | 3252.05   | 1        | -13.3668               | 66.5373                | 2.98678                | -7.64004               | -4.20267               | 9.49136                | 8.80175                | -3.8686                |
| TIAM2    | 0.250896          | -0.503244           | -1.98711             | 1 down vs 2          | 1.61455       | 1541.4         | 5728.14   | 1        | -22.4612               | 8.3201                 | 2.42                   | -2.45818               | -3.87631               | 6.84566                | 84.4484                | -6.66735               |
| TLE3     | 0.118108          | -0.191182           | -5.23061             | 1 down vs 2          | 3.32378       | 120.338        | 217.232   | 1        | -2.26092               | 14.6798                | 2.21926                | 6.83277                | -8.42923               | 3.63215                | 8.2991                 | 4.79709                |
| TLR3     | 0.739684          | -0.880035           | -1.13632             | 1 down vs 2          | 0.121143      | 11.6765        | 578.315   | 1        | 4.11238                | -2.01328               | 6.90494                | -5.50761               | 4.89961                | 2.30891                | 6.63061                | -20.468                |
| TMEM132C | 0.482952          | -0.538296           | -1.85772             | 1 down vs 2          | 0.558932      | 149.714        | 1607.15   | 1        | -4.63586               | 2.10826                | -23.9783               | 2.29528                | -7.04008               | 28.595                 | 17.5908                | 4.72857                |
| TMEM151  | 0.800609          | 0.236656            | -4.22554             | 1 down vs 2          | 0.0696995     | 3.98639        | 343.164   | 1        | -2.16285               | 2.59618                | 2.15568                | 4.36678                | -3.56008               | -1.14477               | 4.05913                | -17.217                |
| TMEM154  | 0.373887          | -0.22052            | -4.53474             | 1 down vs 2          | 0.922593      | 222.966        | 1450.04   | 1        | 3.66055                | 9.79204                | 4.0106                 | -30.9188               | 21.3475                | 8.34683                | 10.7927                | 11.7307                |
| TMEM171  | 0.622159          | 0.214894            | -4.65345             | 1 down vs 2          | 0.269647      | 19.2649        | 428.669   | 1        | 2.44768                | 17.0463                | 11.8834                | 2.71144                | -2.52703               | -5.03701               | -5.70048               | 2.22162                |
| TMEM43   | 0.00376995        | 0.030161            | -1.5869              | 1 down vs 2          | 20.9777       | 120.568        | 34.4847   | 1        | -4.1521                | 7.23996                | 2.44029                | -2.22372               | -2.92365               | 1.79784                | 8.28048                | 4.83691                |
| TMEM45A  | 0.118805          | -0.0527026          | -18.9744             | 1 down vs 2          | 3.30831       | 664.695        | 1205.5    | 1        | -2.98344               | 15.3051                | 15.1984                | 4.03591                | -3.88033               | 4.14245                | 7.58644                | 47.1959                |
| TMEM60   | 0.000670856       | -0.874839           | -1.14307             | 1 down vs 2          | 41.2971       | 105.711        | 15.3586   | 1        | -4.51462               | 6.07674                | 2.91173                | -2.18889               | -3.80751               | 1.84198                | 5.50498                | 3.68925                |
| TMEM71   | 0.187581          | -0.155188           | -6.4438              | 1 down vs 2          | 2.21106       | 1846.92        | 5011.84   | 1        | 2.01558                | 8.93732                | 88.163                 | -16.7157               | 2.05132                | 19.7414                | 14.2626                | 4.73962                |
| TMEM81   | 0.819627          | 0.692809            | -1.4434              | 1 down vs 2          | 0.0567556     | 12.0207        | 1270.78   | 1        | -8.83177               | -4.47105               | 2.22903                | -5.33341               | -2.9661                | 2.88184                | -2.43276               | -39.4192               |
| TMPPRSS5 | 0.873888          | 0.381198            | -2.62331             | 1 down vs 2          | 0.0274334     | 1.39413        | 304.913   | 1        | 2.48246                | 3.43063                | -9.57373               | 5.16375                | -9.23978               | -8.17364               | 3.79102                | 3.55834                |
| TNC      | 0.0887772         | -0.228096           | -4.38413             | 1 down vs 2          | 4.11715       | 500.155        | 728.885   | 1        | -2.2164                | 11.8681                | 3.56393                | -3.61747               | -3.26647               | 2.69217                | 12.3223                | 36.0486                |
| TNFRSF1A | 0.0521974         | -0.213812           | -4.67701             | 1 down vs 2          | 5.83357       | 46.2855        | 47.606    | 1        | 3.02005                | 2.95682                | 2.40845                | -2.51681               | -3.12881               | 1.88039                | 5.39358                | 7.82712                |
| TNPO1    | 0.417332          | -0.0455981          | -21.9307             | 1 down vs 2          | 0.758315      | 3131.6         | 24778.1   | 1        | -3.51466               | 2.31052                | -6.25363               | -6.31771               | 4.48567                | 178.999                | 4.65915                | 15.7134                |
| TRADD    | 0.667702          | 0.379964            | -2.63183             | 1 down vs 2          | 0.203571      | 194644         | 5.74E+06  | 1        | -609.96                | 4.54031                | 3.15941                | 20.4143                | -2.7876                | -2613.7                | 3.2795                 | 4.52159                |
| TREM1    | 0.14178           | -0.0313341          | -31.9141             | 1 down vs 2          | 2.85965       | 212.685        | 446.248   | 1        | 2.55927                | 2.17863                | 13.1554                | 4.60856                | -8.13858               | 3.29175                | 7.77708                | 25.2315                |
| TRERF1   | 0.0726757         | -0.240984           | -4.14966             | 1 down vs 2          | 4.72559       | 177.736        | 225.668   | 1        | -5.14654               | 13.1448                | 3.54429                | 2.50278                | -3.02816               | 2.33347                | 17.4277                | 2.77726                |
| TRIM36   | 0.250547          | 0.0212794           | -46.9937             | 1 down vs 2          | 1.61722       | 381.845        | 1416.67   | 1        | -5.0702                | 45.662                 | 3.57053                | 8.73705                | -2.73603               | 6.60448                | 14.9915                | 2.07598                |
| TRIM59   | 0.887353          | 0.846206            | -1.18175             | 1 down vs 2          | 0.0218409     | 5.76292        | 1583.16   | 1        | -7.47887               | -10.8179               | -6.46985               | -6.97444               | -14.4853               | -44.4991               | -2.45801               | 7.24806                |
| TRNP1    | 0.180794          | -0.815914           | -1.22562             | 1 down vs 2          | 2.29223       | 1064.47        | 2786.3    | 1        | -17.5277               | 2.54153                | 4.0284                 | -8.94333               | -5.64612               | 3.67944                | 59.3285                | -3.97223               |
| TSPAN4   | 0.0351398         | -0.462163           | -2.16374             | 1 down vs 2          | 7.34018       | 538.576        | 440.242   | 1        | -6.91635               | 9.46292                | 3.68913                | -3.41161               | -5.74307               | 3.95494                | 11.6911                | 29.1577                |
| TSPAN4   | 0.178072          | -0.238156           | -4.19893             | 1 down vs 2          | 2.326         | 1238.1         | 3193.72   | 1        | -5.43616               | 17.5342                | 6.14258                | -3.18139               | -6.21052               | 5.86842                | 70.3399                | 3.88483                |

| Gene ID | p-value (1 vs. 2) | MeanRatio (1 vs. 2) | FoldChange (1 vs. 2) | FoldChange (1 vs. 2) | F(Gene Group) | SS(Gene Group) | SS(Error) | F(Error) | FoldChange (106 vs. n) | FoldChange (111 vs. n) | FoldChange (112 vs. n) | FoldChange (121 vs. n) | FoldChange (347 vs. n) | FoldChange (353 vs. n) | FoldChange (537 vs. n) | FoldChange (563 vs. n) |
|---------|-------------------|---------------------|----------------------|----------------------|---------------|----------------|-----------|----------|------------------------|------------------------|------------------------|------------------------|------------------------|------------------------|------------------------|------------------------|
| TTC21A  | 0.0115838         | -0.0681593          | -14.6715             | 1 down vs 2          | 12.8468       | 109.443        | 51.1147   | 1        | -2.85833               | 8.43325                | 3.00655                | 3.9069                 | -2.5111                | 7.81219                | 8.69772                | 7.81281                |
| TTC9B   | 0.846717          | 0.704149            | -1.42015             | 1 down vs 2          | 0.0407363     | 158.476        | 23341.7   | 1        | -50.3113               | 4.33946                | -3.74699               | -4.33048               | -11.0019               | 1.40383                | 6.51405                | -163.884               |
| TTR     | 0.465795          | -0.0833247          | -12.0012             | 1 down vs 2          | 0.606242      | 67471          | 667763    | 1        | 31.5576                | -2.71675               | -2.55105               | 10.8048                | -86.1342               | -16.1633               | -4.64261               | 901.6                  |
| TXNDC17 | 0.000728168       | -0.975231           | -1.0254              | 1 down vs 2          | 40.0444       | 95.0226        | 14.2376   | 1        | -3.27736               | 5.07333                | 2.92488                | -2.38719               | -4.87989               | 1.04567                | 4.09003                | 4.88651                |
| UCN3    | 0.415665          | -0.128292           | -7.79472             | 1 down vs 2          | 0.764087      | 657.063        | 5159.6    | 1        | -9.01128               | 4.2846                 | -2.27667               | 5.92584                | -3.30017               | 79.854                 | -2.73439               | 3.82917                |
| UHRF1   | 0.99272           | 0.945275            | -1.05789             | 1 down vs 2          | 9.05E-05      | 0.0242383      | 1607.79   | 1        | -3.69375               | 14.1967                | -21.536                | -2.23273               | 11.8182                | -7.15651               | 27.5495                | -2.66567               |
| USP36   | 0.0106362         | -0.767723           | -1.30255             | 1 down vs 2          | 13.3627       | 244.015        | 109.565   | 1        | -6.36817               | 6.27842                | 2.50587                | -2.6079                | -5.88737               | 2.84115                | 14.9368                | 5.70514                |
| USP6    | 0.496248          | -0.180069           | -5.55343             | 1 down vs 2          | 0.524339      | 384945         | 4.40E+06  | 1        | -186.917               | 2238.74                | 7.44803                | -2.43461               | -18.0687               | 1.59082                | 2.36829                | -330.323               |
| USP6NL  | 0.0271983         | -0.684341           | -1.46126             | 1 down vs 2          | 8.43222       | 196.101        | 139.537   | 1        | -6.14038               | 10.2166                | 2.3732                 | -3.75999               | -2.56495               | 1.33486                | 14.1503                | 2.28349                |
| VAV3    | 0.489591          | -0.0830478          | -12.0413             | 1 down vs 2          | 0.541442      | 1941.31        | 21512.7   | 1        | -4.27761               | 2.72518                | 4.20217                | -5.33001               | 2.20563                | 2.90481                | 159.464                | -20.7473               |
| VCAM1   | 0.398508          | -0.0470197          | -21.2677             | 1 down vs 2          | 0.825846      | 3846.81        | 27948.2   | 1        | -3.15756               | 9.85219                | 8.0275                 | 2.2479                 | -5.19268               | 2.5627                 | 192.607                | 3.25491                |
| VEGFA   | 0.325716          | 0.293144            | -3.41129             | 1 down vs 2          | 1.14514       | 450.47         | 2360.25   | 1        | -2.02423               | 23.9946                | 5.59711                | 2.80422                | 18.5043                | 12.0552                | 6.88519                | 61.1085                |
| VENTXP1 | 0.757104          | 0.449768            | -2.22337             | 1 down vs 2          | 0.104824      | 4.35176        | 249.09    | 1        | -2.63174               | 4.93929                | -5.72671               | 2.16032                | -3.26448               | -1.10291               | -14.3425               | 2.38902                |
| WBSCR19 | 0.167393          | -0.499552           | -2.00179             | 1 down vs 2          | 2.46593       | 4243.13        | 10324.2   | 1        | -3.27487               | 17.0339                | 109.701                | -27.5301               | -16.7376               | -22.7788               | 8.31109                | 46.3502                |
| WDR55   | 0.158799          | -0.477358           | -2.09486             | 1 down vs 2          | 2.58803       | 464.649        | 1077.23   | 1        | -5.12674               | 4.80967                | 2.95259                | -2.99429               | -7.13853               | 1.12828                | 4.61375                | 39.7735                |
| WDR90   | 0.0155605         | -0.568325           | -1.75956             | 1 down vs 2          | 11.1733       | 121.193        | 65.0798   | 1        | -7.37287               | 4.47445                | 2.44528                | 2.74099                | -4.10829               | 6.04703                | 5.87209                | 5.7209                 |
| WEE1    | 0.131557          | -0.123528           | -8.09533             | 1 down vs 2          | 3.0458        | 2143.4         | 4222.35   | 1        | -6.12748               | 49.3784                | 11.6813                | -2.69942               | -2.32514               | 7.35078                | 78.0837                | 3.97152                |
| WFDC10A | 0.88958           | 0.419299            | -2.38493             | 1 down vs 2          | 0.0209788     | 1.86525        | 533.469   | 1        | -3.86561               | 2.59175                | -18.2671               | 9.64522                | -7.94014               | -1.30182               | 5.0511                 | 3.3382                 |
| WNT8A   | 0.47976           | 0.0200357           | -49.9109             | 1 down vs 2          | 0.5675        | 244.372        | 2583.67   | 1        | -6.05229               | -2.74748               | -3.28198               | 2.00717                | 3.34489                | 1.76203                | 2.43869                | -56.4198               |
| WSCD2   | 0.398239          | -0.311024           | -3.21519             | 1 down vs 2          | 0.826847      | 1225.16        | 8890.31   | 1        | -7.89931               | -2.17279               | -2.89511               | -2.46262               | -7.83085               | 2.38696                | 103.638                | -4.26832               |
| WWP2    | 0.961772          | 0.922433            | -1.08409             | 1 down vs 2          | 0.00249649    | 0.365189       | 877.685   | 1        | -2.27466               | 30.2079                | -4.02006               | 7.17978                | 10.8397                | 2.2044                 | 2.71247                | -2.65672               |
| XPR1    | 0.0167318         | -0.413888           | -2.41611             | 1 down vs 2          | 10.7868       | 359.371        | 199.894   | 1        | -6.27861               | 10.8467                | 5.23538                | -3.08747               | -2.79187               | 3.28264                | 21.0448                | 8.54873                |
| YOD1    | 0.0586963         | -0.493398           | -2.02676             | 1 down vs 2          | 5.42568       | 71.7168        | 79.3082   | 1        | -6.62217               | 7.4285                 | 2.0263                 | 3.97619                | -3.48391               | 2.11084                | 4.93277                | 4.20798                |
| ZBBX    | 0.412084          | -0.584127           | -11.8868             | 1 down vs 2          | 0.77662       | 8729.25        | 67400.4   | 1        | -19.2869               | 5.56231                | 2.41591                | 7.52386                | -4.12112               | 14.6317                | 294.327                | -2.25074               |
| ZDHHC21 | 0.367551          | -0.237551           | -4.20961             | 1 down vs 2          | 0.949193      | 6733.9         | 42566.1   | 1        | -27.9032               | 9.24279                | 2.38222                | -2.47909               | -4.12798               | 2.51848                | 231.891                | -3.90961               |
| ZFYVE28 | 0.202402          | -0.857761           | -1.16583             | 1 down vs 2          | 2.04758       | 1473.68        | 4318.3    | 1        | -3.72953               | 7.79726                | -2.74795               | 2.20077                | -37.304                | 1.11596                | 66.8873                | 2.40119                |
| ZFYVE9  | 0.0978333         | -0.855204           | -1.16931             | 1 down vs 2          | 3.83761       | 1515.65        | 2369.68   | 1        | -31.7325               | 19.6371                | -2.22546               | -4.93388               | -2.65219               | 14.4532                | 49.0239                | -4.26263               |
| ZFYVE9  | 0.200259          | -0.556433           | -1.79716             | 1 down vs 2          | 2.07014       | 4382.63        | 12702.4   | 1        | -40.9231               | 62.9214                | -17.0007               | -13.562                | 2.63251                | 5.17836                | 110.64                 | -6.42659               |
| ZMYM6   | 0.0390989         | -0.596316           | -1.67696             | 1 down vs 2          | 6.91295       | 98.3007        | 85.3187   | 1        | -2.59022               | 3.96361                | 2.52819                | -2.06605               | -3.45813               | -1.30081               | 6.45436                | 11.0339                |
| ZNF146  | 0.00120174        | -0.841765           | -1.18798             | 1 down vs 2          | 33.0909       | 77.7277        | 14.0935   | 1        | -3.84549               | 4.66011                | 5.99136                | -2.23581               | -2.74676               | 1.65919                | 2.3372                 | 2.8314                 |
| ZNF187  | 0.206987          | -0.680061           | -1.47046             | 1 down vs 2          | 2.00045       | 4605.75        | 13814.2   | 1        | -60.0938               | 30.2338                | 119.307                | -3.2705                | 3.17854                | -20.3226               | 6.64446                | 11.6382                |
| ZNF197  | 0.373134          | -0.131043           | -7.63106             | 1 down vs 2          | 0.925717      | 52.9227        | 343.017   | 1        | -3.96672               | 7.01832                | 18.462                 | -2.42602               | -2.62942               | 3.05323                | -2.41802               |                        |
| ZNF441  | 0.289365          | -0.350135           | -2.85604             | 1 down vs 2          | 1.35024       | 439.866        | 1954.62   | 1        | -14.3572               | 36.0726                | 21.3504                | -3.84619               | 6.28714                | -1.9296                | 18.2698                | -17.0411               |
| ZNF474  | 0.39075           | -0.088031           | -11.3596             | 1 down vs 2          | 0.855246      | 2153.4         | 15107.2   | 1        | -5.06656               | 2.73202                | 2.90225                | 3.20363                | -6.36285               | 7.12974                | 140.829                | 2.14342                |
| ZNF480  | 0.0228145         | -0.960937           | -1.04065             | 1 down vs 2          | 9.23919       | 57.7924        | 37.5309   | 1        | -3.15654               | 6.50102                | 2.52575                | -2.05248               | -2.95281               | -1.78084               | 4.23938                | 2.67071                |
| ZNF556  | 0.0945654         | -0.65885            | -1.5178              | 1 down vs 2          | 3.93423       | 3383.68        | 5160.37   | 1        | -52.9407               | 19.7419                | 12.0728                | 6.14164                | -3.81776               | 3.50478                | 74.5733                | 18.1506                |
| ZNF619  | 0.873096          | 0.322328            | -3.10243             | 1 down vs 2          | 0.0277827     | 0.591719       | 127.788   | 1        | -2.62677               | 2.4                    | -4.40343               | 7.17038                | -3.74201               | -1.41627               | 5.07736                | 2.48718                |
| ZNF79   | 0.0139933         | -0.808917           | -1.23622             | 1 down vs 2          | 11.756        | 204.224        | 104.231   | 1        | -4.72056               | 7.69805                | 2.95807                | -2.41563               | -6.86483               | -1.00889               | 7.67471                | 11.5253                |
| ZNF792  | 0.0144443         | -0.748747           | -1.33556             | 1 down vs 2          | 11.5797       | 241.806        | 125.292   | 1        | -4.06012               | 3.7792                 | 3.16113                | -2.79545               | -7.73132               | 1.67054                | 14.3079                | 9.55078                |
| ZSWIM3  | 0.330133          | -0.297123           | -3.36561             | 1 down vs 2          | 1.12262       | 407.646        | 2178.71   | 1        | -8.19988               | 3.17199                | -4.21155               | -9.58127               | 7.64864                | 49.0768                | 13.5221                | -4.72255               |
| ZYX     | 0.00298101        | -0.620935           | -1.61047             | 1 down vs 2          | 23.102        | 95.9548        | 24.9212   | 1        | -2.48038               | 4.3663                 | 2.13724                | -2.64547               | -3.09534               | 2.02367                | 5.60356                | 7.93592                |
| A2BP1   | 0.74341           | 2.07376             | 2.07376              | 1 up vs 2            | 0.117541      | 285.326        | 14564.8   | 1        | -35.198                | -34.9746               | -2.07032               | -4.79832               | -31.4767               | 2.31781                | 69.8334                | -92.5486               |
| AAA1    | 0.201252          | -1.28875            | 1.28875              | 1 up vs 2            | 2.05964       | 21190.2        | 61729.6   | 1        | -173.6                 | 230.318                | 3.5258                 | -3.9559                | -2.02385               | -4.0406                | 5.1911                 | -2.75322               |
| AAK1    | 0.939046          | 1.18743             | 1.18743              | 1 up vs 2            | 0.0063566     | 47.2173        | 44568.4   | 1        | -71.1119               | -2.01066               | -3.6661                | -5.85693               | -18.4058               | -2.93354               | 75.0017                | -200.258               |
| ABCA5   | 0.0859367         | -1.74912            | 1.74912              | 1 up vs 2            | 4.21301       | 102.568        | 146.074   | 1        | -5.7132                | 8.09943                | -3.08468               | 2.15335                | -10.5575               | 2.73335                | 3.59535                | 2.10843                |
| ABC89   | 0.0209972         | 8.88275             | 8.88275              | 1 up vs 2            | 9.63754       | 279.15         | 173.789   | 1        | -20.6638               | -2.7604                | -3.64194               | -6.2955                | -14.2893               | -6.77817               | 3.20958                | 2.23147                |
| ABCC13  | 0.112831          | -3.11033            | 3.11033              | 1 up vs 2            | 3.44514       | 11872          | 20676.1   | 1        | -12.5957               | 5.24034                | 93.3798                | -12.4956               | -155.548               | -1.60112               | -9.24992               | 9.02627                |
| ABHD11  | 0.27699           | 35.4911             | 35.4911              | 1 up vs 2            | 1.42924       | 73.5934        | 308.947   | 1        | -16.6849               | 4.41959                | -2.03724               | -6.34426               | 3.68934                | -6.46113               | 5.52774                | -2.35716               |
| ACE     | 0.128807          | 7.8777              | 7.8777               | 1 up vs 2            | 3.09935       | 1224.52        | 2370.55   | 1        | 61.3601                | 24.8145                | -4.06264               | 23.2386                | 3.21466                | 2.2891                 | 2.62075                | -7.08325               |
| ACOT11  | 0.671727          | 4.44269             | 4.44269              | 1 up vs 2            | 0.198281      | 24.1739        | 731.504   | 1        | -4.35693               | -2.17914               | -23.6805               | -4.10481               | -5.43914               | 5.02376                | 11.2147                | 4.40629                |
| ACSL3   | 0.0855285         | -2.37321            | 2.37321              | 1 up vs 2            | 4.22714       | 112.181        | 159.229   | 1        | -4.38466               | 3.30687                | 3.07615                | -8.08933               | -3.85174               | -3.03857               | 11.5524                | -3.43156               |
| ACTL6B  | 0.131001          | -3.99064            | 3.99064              | 1 up vs 2            | 3.05649       | 2477.96        | 4864.32   | 1        | -68.9956               | 2.28181                | 3.71841                | -2.31008               | -15.9018               | -14.044                | 49.0769                | -4.61146               |

| Gene ID  | p-value (1 vs. 2) | MeanRatio (1 vs. 2) | FoldChange (1 vs. 2) | FoldChange (1 vs. 2) | F(Gene Group) | SS(Gene Group) | SS(Error) | F(Error) | FoldChange (106 vs. n) | FoldChange (111 vs. n) | FoldChange (112 vs. n) | FoldChange (121 vs. n) | FoldChange (347 vs. n) | FoldChange (353 vs. n) | FoldChange (537 vs. n) | FoldChange (563 vs. n) |
|----------|-------------------|---------------------|----------------------|----------------------|---------------|----------------|-----------|----------|------------------------|------------------------|------------------------|------------------------|------------------------|------------------------|------------------------|------------------------|
| ACVRL1   | 0.391973          | 5.53506             | 5.53506              | 1 up vs 2            | 0.850547      | 357.177        | 2519.63   | 1        | 2.1037                 | 3.91719                | -4.47801               | -55.8309               | 3.19108                | -15.3586               | 2.99831                | -2.29586               |
| ADARB1   | 0.0263823         | -4.26921            | 4.26921              | 1 up vs 2            | 8.56861       | 1091.75        | 764.476   | 1        | -30.5584               | 2.45741                | 7.39454                | -3.75097               | -24.3428               | 2.54331                | 18.5408                | -8.0387                |
| ADRA2C   | 0.981589          | 1.0994              | 1.0994               | 1 up vs 2            | 0.00057864    | 0.207606       | 2152.71   | 1        | -3.35406               | 3.09022                | 7.56243                | -4.4777                | -3.2094                | 6.09547                | 11.0347                | -44.521                |
| ADRB1    | 0.141701          | -2.33886            | 2.33886              | 1 up vs 2            | 2.86102       | 239.256        | 501.757   | 1        | -11.7555               | 7.85382                | 4.14799                | -5.46771               | -6.51556               | 4.03816                | 15.2825                | -14.4063               |
| AGAP11   | 0.93481           | -4.63895            | 4.63895              | 1 up vs 2            | 0.00727331    | 0.384383       | 317.091   | 1        | -13.0114               | -2.00858               | 2.97485                | 9.08553                | 2.80843                | 1.13021                | 3.74654                | -5.44155               |
| AGBL2    | 0.823411          | 1.69049             | 1.69049              | 1 up vs 2            | 0.0543493     | 33.3894        | 3686.09   | 1        | -3.86895               | -56.5386               | 6.28418                | -24.5851               | -2.54022               | -1.11589               | 17.9321                | 2.88066                |
| AGGF1    | 0.00488487        | -1.39019            | 1.39019              | 1 up vs 2            | 18.82         | 161.466        | 51.4772   | 1        | -9.95794               | 4.70726                | 3.07916                | -2.19146               | -4.04272               | 2.19248                | 7.26543                | 2.16801                |
| AGXT2L1  | 0.327049          | 4.00746             | 4.00746              | 1 up vs 2            | 1.1383        | 1548.71        | 8163.28   | 1        | -5.94273               | -40.4131               | -4.83448               | -2.68627               | -106.259               | -2.22397               | 3.34849                | -3.65783               |
| AJAP1    | 0.273365          | 3.48523             | 3.48523              | 1 up vs 2            | 1.4534        | 175.572        | 724.806   | 1        | -14.8864               | 2.49065                | -3.89473               | 2.52935                | -28.3541               | -4.54152               | 2.9259                 | -16.4487               |
| AKAP2    | 0.751442          | 11.835              | 11.835               | 1 up vs 2            | 0.109982      | 45.6402        | 2489.86   | 1        | -4.26691               | 28.4995                | 4.50867                | -19.3497               | 7.44945                | -3.81771               | 4.11199                | -35.5792               |
| ALAS1    | 0.0713917         | -2.96327            | 2.96327              | 1 up vs 2            | 4.78197       | 68.5006        | 85.9485   | 1        | -7.17778               | 2.58549                | 2.77424                | -2.31907               | -4.06083               | 3.95865                | 4.34841                | -6.04139               |
| ALDH1A3  | 0.209493          | -1049.46            | 1049.46              | 1 up vs 2            | 1.97532       | 980352         | 2.98E+06  | 1        | -2131.34               | 7.27037                | 2.21782                | -15.9252               | -19.93                 | 4.20442                | -4.75004               | -5.50081               |
| ANXA13   | 0.434428          | -23.5051            | 23.5051              | 1 up vs 2            | 0.701304      | 24.1085        | 206.26    | 1        | -3.94508               | 2.61315                | 4.34505                | 3.63451                | -10.0078               | -4.88847               | 4.91784                | -6.25593               |
| AP1S1    | 0.024618          | -2.17017            | 2.17017              | 1 up vs 2            | 8.8839        | 373.087        | 251.975   | 1        | -18.2307               | 7.97815                | 2.97518                | -2.81392               | -7.9246                | 1.91533                | 12.0203                | -2.64091               |
| AP1S2    | 0.00213179        | -1.037              | 1.037                | 1 up vs 2            | 26.4405       | 126.6          | 28.7286   | 1        | -2.13535               | 4.99793                | 3.48126                | -6.57109               | -3.84299               | 1.93434                | 7.29142                | 2.46456                |
| AP2A1    | 0.232068          | 32.1824             | 32.1824              | 1 up vs 2            | 1.76695       | 234221         | 795338    | 1        | 2.22338                | -17.8359               | -4.07331               | -3.81739               | -1092.72               | -27.1041               | -3.89175               | -3.76739               |
| AQP2     | 0.313735          | -1.2271             | 1.2271               | 1 up vs 2            | 1.2087        | 60.7049        | 301.341   | 1        | -11.9154               | 12.3067                | -3.56708               | -2.17327               | 4.68338                | 2.0751                 | 4.47454                | -2.5148                |
| AQP6     | 0.0189885         | -3.04249            | 3.04249              | 1 up vs 2            | 10.1355       | 215.151        | 127.365   | 1        | 12.2259                | -7.00702               | 2.39399                | 6.55542                | 5.40515                | 2.01938                | -2.15543               | -8.50019               |
| ARAP2    | 0.124674          | 3.79491             | 3.79491              | 1 up vs 2            | 3.18287       | 58.8396        | 110.918   | 1        | -4.83864               | -2.59009               | -2.61625               | -3.87657               | -14.1034               | -4.11767               | 3.92144                | -4.61901               |
| ARHGAP20 | 0.0265261         | -6.87453            | 6.87453              | 1 up vs 2            | 8.54417       | 585.419        | 411.101   | 1        | -29.0448               | 5.26352                | 2.68969                | -3.37795               | -13.855                | 1.52528                | 6.54506                | -4.80394               |
| ARHGAP24 | 0.122774          | -9.77452            | 9.77452              | 1 up vs 2            | 3.22257       | 51.4431        | 95.7801   | 1        | -2.53984               | -2.92909               | 2.85871                | -2.15216               | -9.56347               | -4.53872               | 3.63696                | 3.40286                |
| ARID2    | 0.0578681         | -1.23855            | 1.23855              | 1 up vs 2            | 5.47417       | 3202.17        | 3509.76   | 1        | -10.0578               | 53.1372                | 2.7437                 | -2.17735               | -56.3595               | 2.47454                | 10.4012                | 23.5482                |
| ARL6IP1  | 0.0530197         | -4.83607            | 4.83607              | 1 up vs 2            | 5.77825       | 181.291        | 188.249   | 1        | -16.371                | 3.80324                | -2.44778               | -2.5985                | -5.475                 | 2.84461                | 7.56249                | -3.3382                |
| ARSB     | 0.00352072        | -2.83654            | 2.83654              | 1 up vs 2            | 21.5794       | 271.256        | 75.4208   | 1        | -8.46039               | 4.11799                | 3.22181                | -3.13088               | -15.0871               | 1.54458                | 3.28189                | 3.50913                |
| ART3     | 0.733835          | 1.26213             | 1.26213              | 1 up vs 2            | 0.126925      | 5.99672        | 283.477   | 1        | -2.12701               | -3.12788               | -14.7057               | -3.8306                | -19.8746               | -6.57623               | -2.84041               | -6.86164               |
| ATCAY    | 0.1927            | -19.6098            | 19.6098              | 1 up vs 2            | 2.15257       | 27090.9        | 75512.2   | 1        | -336.519               | 13.3949                | 3.37797                | -4.15191               | -2.43766               | 2.82771                | 31.3389                | -21.7782               |
| ATG3     | 0.0638078         | 10.5808             | 10.5808              | 1 up vs 2            | 5.14564       | 55.727         | 64.9798   | 1        | -8.17529               | 2.90956                | -2.33745               | -7.57315               | -2.31374               | -1.44344               | 2.74434                | -4.71812               |
| ATP5G2   | 0.145109          | -5.20822            | 5.20822              | 1 up vs 2            | 2.80304       | 316.852        | 678.232   | 1        | -28.4733               | 12.7735                | -4.1664                | 2.53977                | -6.78327               | -2.67982               | -2.1001                |                        |
| ATP6V1B1 | 0.164132          | -46.2536            | 46.2536              | 1 up vs 2            | 2.51121       | 10698.4        | 25561.6   | 1        | -15.5395               | 4.19583                | -4.00474               | -204.058               | -2.21751               | -2.16093               | 4.26375                | 5.6988                 |
| ATP8B2   | 0.163363          | -1.37879            | 1.37879              | 1 up vs 2            | 2.52206       | 325.437        | 774.217   | 1        | -7.71428               | 8.45225                | 2.08483                | -12.3674               | -2.8268                | -3.58862               | 27.3753                | -6.63229               |
| ATP8B4   | 0.00387814        | -1.95527            | 1.95527              | 1 up vs 2            | 20.7328       | 65.5304        | 18.9642   | 1        | -3.17884               | 2.45694                | 3.56211                | -4.27571               | -4.2796                | -1.60757               | 3.57976                | 2.01092                |
| ATRX     | 0.0538843         | -3.28509            | 3.28509              | 1 up vs 2            | 5.72132       | 167.17         | 175.313   | 1        | -11.5584               | 7.49898                | 3.75454                | -7.27943               | -2.87856               | -2.27403               | 7.51287                | -5.47472               |
| B4GALT6  | 0.730457          | 1.96978             | 1.96978              | 1 up vs 2            | 0.130334      | 283.92         | 13070.4   | 1        | -68.0451               | 12.3745                | 5.87118                | -4.40883               | -2.52915               | 2.08823                | 18.9065                | -102.685               |
| BCAP29   | 0.0245468         | -2.85453            | 2.85453              | 1 up vs 2            | 8.89724       | 80.5224        | 54.3016   | 1        | -5.48168               | 3.59114                | 3.50362                | -3.48129               | -5.59639               | -2.11063               | 5.6387                 | -2.1221                |
| BCKDHB   | 0.0805162         | -9.69734            | 9.69734              | 1 up vs 2            | 4.40855       | 399.219        | 543.334   | 1        | -30.4492               | 8.20298                | -4.13482               | -6.36466               | -2.86901               | 1.74609                | 3.12149                | -2.11551               |
| BCL11B   | 0.615512          | 2.82448             | 2.82448              | 1 up vs 2            | 0.280301      | 1345.67        | 28804.8   | 1        | -110.898               | 7.5882                 | 2.08043                | -6.91332               | -6.60818               | 40.9598                | 19.2783                | -143.324               |
| BCL7A    | 0.158973          | -1.30391            | 1.30391              | 1 up vs 2            | 2.58546       | 147.923        | 343.281   | 1        | -12.81                 | 3.90161                | 2.539                  | 2.70846                | -4.97916               | 3.22578                | 15.2675                | -5.65768               |
| BCMO1    | 0.0350285         | -20.0946            | 20.0946              | 1 up vs 2            | 7.35312       | 149.197        | 121.742   | 1        | -2.81118               | 4.58692                | -4.1646                | -13.9338               | -8.74731               | 2.16674                | 2.72025                | -3.19495               |
| BDH1     | 0.032645          | -2.19276            | 2.19276              | 1 up vs 2            | 7.64426       | 70.471         | 55.3129   | 1        | -7.36757               | 2.04317                | -3.57658               | -2.52172               | -2.74209               | 3.47906                | 3.37947                | 4.27569                |
| BDNF     | 0.0660727         | -4.06956            | 4.06956              | 1 up vs 2            | 5.03111       | 2148.26        | 2561.97   | 1        | -59.07                 | 6.22739                | 14.9472                | -18.7216               | -3.72404               | -1.936                 | -2.92707               |                        |
| BMP1     | 0.642303          | 3.05161             | 3.05161              | 1 up vs 2            | 0.238973      | 15.8575        | 398.141   | 1        | -18.5713               | -2.42653               | 3.09427                | 8.60625                | -3.01187               | -3.29014               | -2.10447               | -2.36059               |
| BMP10    | 0.646261          | -37.6679            | 37.6679              | 1 up vs 2            | 0.23322       | 5.21654        | 134.205   | 1        | 2.22595                | 3.17393                | -2.54012               | -3.95644               | -3.14404               | -8.08811               | 3.45873                | 4.21125                |
| BMP2K    | 0.0651012         | -3.81223            | 3.81223              | 1 up vs 2            | 5.07957       | 699.751        | 826.548   | 1        | -4.46932               | 12.9651                | 3.3696                 | -5.83717               | -35.6054               | -2.39281               | 9.54606                | -3.41576               |
| BMP5     | 0.21301           | -118.375            | 118.375              | 1 up vs 2            | 1.94076       | 6.49E+07       | 2.01E+08  | 1        | -17405.5               | 42.0935                | 45.2157                | -106.245               | 3.0936                 | -1.124                 | 153.916                | 6.4125                 |
| BPNT1    | 0.00772902        | -1.32799            | 1.32799              | 1 up vs 2            | 15.4305       | 134.403        | 52.2613   | 1        | -5.54581               | 4.15924                | 2.64164                | -2.08655               | -6.85664               | -1.27469               | 5.98733                | 6.67063                |
| BRUNOL4  | 0.22334           | 14.313              | 14.313               | 1 up vs 2            | 1.84388       | 3034.94        | 9875.73   | 1        | -101.926               | -8.46381               | -2.11676               | -17.8288               | -10.008                | -1.09984               | 46.4725                | -49.9022               |
| BTBD16   | 0.368437          | 3.58095             | 3.58095              | 1 up vs 2            | 0.945428      | 767.218        | 4869.02   | 1        | 19.521                 | -3.49113               | -8.88883               | -25.9468               | -77.7716               | -17.132                | -6.41613               | -3.25955               |
| BTF3L1   | 0.769717          | 1.53226             | 1.53226              | 1 up vs 2            | 0.0938276     | 17.0362        | 1089.41   | 1        | 18.7685                | -2.60625               | -5.41944               | -4.69123               | 11.9552                | 30.0387                | 3.40414                | 2.89884                |
| BUB1B    | 0.98658           | 1.15435             | 1.15435              | 1 up vs 2            | 0.00030741    | 0.165107       | 3222.53   | 1        | -6.0465                | 25.1891                | 2.72413                | 3.46248                | -4.07391               | 6.40242                | 5.81062                | -49.7391               |
| BZRAP1   | 0.125979          | -3.98331            | 3.98331              | 1 up vs 2            | 3.15608       | 183.448        | 348.751   | 1        | -8.33528               | -4.26683               | -2.53549               | -2.05211               | -13.332                | 4.81652                | 15.5935                | -3.68322               |
| BZW1     | 0.166337          | -12.4058            | 12.4058              | 1 up vs 2            | 2.48045       | 6058.29        | 14654.5   | 1        | -151.285               | 10.2584                | 3.36777                | -2.90105               | -3.62149               | 1.85519                | 3.29312                | 2.42624                |
| C10orf59 | 0.554248          | 2.49018             | 2.49018              | 1 up vs 2            | 0.392117      | 34.0973        | 521.742   | 1        | -9.80421               | 2.89056                | 2.31375                | -3.70873               | -7.86536               | -1.34184               | 4.38101                | -22.5519               |

| Gene ID   | p-value (1 vs. 2) | MeanRatio (1 vs. 2) | FoldChange (1 vs. 2) | FoldChange (1 vs. 2) | F(Gene Group) | SS(Gene Group) | SS(Error) | F(Error) | FoldChange (106 vs. n) | FoldChange (111 vs. n) | FoldChange (112 vs. n) | FoldChange (121 vs. n) | FoldChange (347 vs. n) | FoldChange (353 vs. n) | FoldChange (537 vs. n) | FoldChange (563 vs. n) |
|-----------|-------------------|---------------------|----------------------|----------------------|---------------|----------------|-----------|----------|------------------------|------------------------|------------------------|------------------------|------------------------|------------------------|------------------------|------------------------|
| C10orf61  | 0.000228888       | -1.64987            | 1.64987              | 1 up vs 2            | 61.3366       | 199.488        | 19.5141   | 1        | -5.3346                | 3.59077                | 3.31252                | -4.28356               | -9.64839               | 4.56027                | 5.10701                | 2.89213                |
| C10orf99  | 0.24425           | -3.4966             | 3.4966               | 1 up vs 2            | 1.66637       | 49.3633        | 177.739   | 1        | -4.9868                | 8.00605                | 2.43532                | -3.62734               | -3.35559               | -2.76533               | 6.19472                | -8.16534               |
| C12orf39  | 0.673873          | 1.38916             | 1.38916              | 1 up vs 2            | 0.195496      | 2.54045        | 77.9694   | 1        | -2.01687               | -2.58932               | -4.13717               | -2.4253                | -8.02313               | -8.18035               | -2.1965                | 2.14786                |
| C16orf75  | 0.171105          | -6.04806            | 6.04806              | 1 up vs 2            | 2.4159        | 7485.81        | 18591.4   | 1        | -163.096               | 33.1402                | 2.53406                | 2.57165                | -2.13775               | 2.03867                | 9.35463                | -2.24268               |
| C17orf76  | 0.155357          | -10.3179            | 10.3179              | 1 up vs 2            | 2.63957       | 2675.18        | 6080.94   | 1        | -97.9603               | 2.08589                | 2.05465                | -2.06334               | -3.28173               | 2.24375                | 7.98351                | 2.31931                |
| C19orf12  | 0.569041          | 17.5886             | 17.5886              | 1 up vs 2            | 0.362728      | 79.2672        | 1311.18   | 1        | -11.1984               | 8.97168                | 4.58821                | -3.08674               | -6.39669               | -3.55627               | 17.3949                | -29.3583               |
| C1GALT1C1 | 0.00512161        | -1.72181            | 1.72181              | 1 up vs 2            | 18.4457       | 95.5847        | 31.0917   | 1        | -7.00368               | 5.04226                | 2.62611                | -2.97358               | -3.57284               | -1.22002               | 3.3006                 | 3.36716                |
| C1orf115  | 0.153307          | 6.49284             | 6.49284              | 1 up vs 2            | 2.67104       | 1192.09        | 2677.8    | 1        | -55.0146               | -4.97641               | -3.01947               | -8.02817               | -26.3727               | 1.52194                | 19.0524                | -35.5308               |
| C1orf135  | 0.0994171         | -1.64133            | 1.64133              | 1 up vs 2            | 3.79235       | 2328.11        | 3683.37   | 1        | -61.5433               | 11.0864                | 2.23872                | 2.63721                | -6.78336               | 6.3387                 | 44.6929                | 2.34669                |
| C1orf147  | 0.196419          | -3.0746             | 3.0746               | 1 up vs 2            | 2.11146       | 378.131        | 1074.51   | 1        | 5.18158                | 3.00435                | -3.11581               | -33.2002               | -4.12875               | 5.1659                 | 16.4726                | -4.10072               |
| C1orf158  | 0.302751          | 8.68786             | 8.68786              | 1 up vs 2            | 1.27033       | 622691         | 2.94E+06  | 1        | -2.79071               | 21.7168                | 3.16641                | 2029.27                | -72.7504               | 4.47852                | 343.186                | 2.2528                 |
| C1orf183  | 0.072235          | -2.8842             | 2.8842               | 1 up vs 2            | 4.74479       | 1258.95        | 1592      | 1        | -41.0332               | 31.9557                | -4.35444               | -8.09122               | -8.5985                | 1.232                  | 7.26954                | -2.74697               |
| C1orf183  | 0.0651368         | -6.1577             | 6.1577               | 1 up vs 2            | 5.07778       | 395.899        | 467.802   | 1        | -24.5719               | 4.26066                | -3.34486               | -5.83899               | -7.0914                | 2.23546                | 13.752                 | -6.75274               |
| C1orf200  | 0.231673          | -12.8741            | 12.8741              | 1 up vs 2            | 1.77034       | 110.558        | 374.702   | 1        | -16.9701               | -2.59643               | -3.39183               | -2.13373               | -2.27227               | 6.05718                | -7.93169               | 10.6301                |
| C1orf81   | 0.199375          | -1.98545            | 1.98545              | 1 up vs 2            | 2.07955       | 5839.31        | 16847.8   | 1        | -104.641               | 6.72009                | 105.031                | -6.46075               | -2.05801               | 3.45881                | 3.72856                | -25.4753               |
| C20orf197 | 0.141528          | -2.53815            | 1.53815              | 1 up vs 2            | 2.86401       | 117.362        | 245.87    | 1        | 2.28582                | 3.73746                | 5.28493                | -14.1491               | -2.52027               | -1.0567                | 10.1183                | -2.49863               |
| C2orf52   | 0.154512          | -75.9932            | 75.9932              | 1 up vs 2            | 2.65247       | 5992.86        | 13556.1   | 1        | -149.335               | 15.465                 | -10.6861               | -3.20378               | -14.863                | -1.12113               | 2.57469                | -2.56104               |
| C2orf80   | 0.156619          | 49.9752             | 49.9752              | 1 up vs 2            | 2.62049       | 27693.3        | 63408     | 1        | -327.127               | 11.1353                | 3.5837                 | -26.3461               | -18.5641               | 4.50992                | 5.00988                | -36.6462               |
| C3orf71   | 0.0654622         | -1.40983            | 1.40983              | 1 up vs 2            | 5.06145       | 215.834        | 255.856   | 1        | -6.04605               | 17.3598                | 2.21684                | -2.41818               | -10.3662               | -2.21902               | 2.25437                | 2.64892                |
| C6orf115  | 0.00017599        | -1.46417            | 1.46417              | 1 up vs 2            | 67.4286       | 114.621        | 10.1993   | 1        | -4.05826               | 4.02429                | 2.61567                | -3.06534               | -6.8135                | 2.66714                | 4.09846                | 2.45911                |
| C6orf117  | 0.159154          | -44.4653            | 44.4653              | 1 up vs 2            | 2.5828        | 29814.7        | 69261.4   | 1        | -337.865               | 2.87831                | 3.83876                | -10.3124               | -21.8018               | 4.04377                | 10.1983                | -7.09142               |
| C6orf120  | 0.124962          | -1.84868            | 1.84868              | 1 up vs 2            | 3.17692       | 5712.36        | 10788.5   | 1        | -94.7162               | 85.9722                | 3.5771                 | -9.21927               | -3.52456               | -1.57671               | 4.22406                | 4.68306                |
| C8orf79   | 0.0703542         | -1.09113            | 1.09113              | 1 up vs 2            | 4.82854       | 466.419        | 579.577   | 1        | -9.05073               | 3.55963                | 7.5102                 | -4.20666               | -11.4316               | 1.52175                | 27.5601                | -2.43988               |
| C9orf23   | 0.0215772         | -2.55331            | 2.55331              | 1 up vs 2            | 9.50552       | 53.8761        | 30.0073   | 1        | -4.36541               | -3.49224               | 2.03831                | -3.71228               | -3.47782               | 1.96199                | 6.31515                | 3.41963                |
| C9orf36   | 0.638125          | 1.76152             | 1.76152              | 1 up vs 2            | 0.24514       | 7.53469        | 184.418   | 1        | -3.13625               | -2.71044               | 4.12709                | 3.27962                | 13.7677                | 3.41604                | 5.32487                | 3.00446                |
| C9orf82   | 0.00710708        | -2.89775            | 2.89775              | 1 up vs 2            | 16.0118       | 305.249        | 114.384   | 1        | -9.87109               | 2.92861                | -2.36299               | -4.3765                | -14.2098               | 1.44501                | 7.38522                | 6.97165                |
| C9orf95   | 0.00943094        | -1.67217            | 1.67217              | 1 up vs 2            | 14.1156       | 93.0292        | 39.5432   | 1        | -3.86074               | 2.52566                | 2.28968                | -3.11748               | -6.2453                | -1.0871                | 7.12106                | 2.33067                |
| CABP1     | 0.317288          | -8.39666            | 8.39666              | 1 up vs 2            | 1.18946       | 295.428        | 1490.23   | 1        | -39.9664               | 6.74056                | 5.80645                | 11.2617                | -4.94488               | -1.41959               | 2.07322                | -6.52148               |
| CACNB2    | 0.0315614         | -1.72095            | 1.72095              | 1 up vs 2            | 7.78626       | 1386.12        | 1068.13   | 1        | -31.7689               | 4.03806                | 8.65047                | -6.62027               | -13.2013               | 11.2772                | 31.315                 | -5.31766               |
| CALHM1    | 0.229514          | 29.7973             | 29.7973              | 1 up vs 2            | 1.78902       | 116.21         | 389.745   | 1        | -6.30351               | -2.3478                | -2.34674               | -14.3226               | -3.81201               | -8.99289               | 15.1603                | -2.83978               |
| CALHM2    | 0.00595639        | -1.02883            | 1.02883              | 1 up vs 2            | 17.2906       | 80.5889        | 27.9652   | 1        | -2.34112               | 2.55949                | 2.13095                | -4.36099               | -3.27161               | 1.6138                 | 7.7456                 | 2.10715                |
| CALY      | 0.219894          | 49.6198             | 49.6198              | 1 up vs 2            | 1.87546       | 376415         | 1.20E+06  | 1        | -1352.09               | -50.0463               | -2.30275               | -2.12218               | -17.604                | -2.28761               | 25.9132                | -17.3541               |
| CAMK1D    | 0.052276          | -1.66783            | 1.66783              | 1 up vs 2            | 5.82823       | 239.702        | 246.767   | 1        | -9.34081               | 4.85099                | 3.13905                | -2.11535               | -9.74944               | 3.52545                | 15.0129                | -5.33762               |
| CAMK2A    | 0.850847          | 1.18568             | 1.18568              | 1 up vs 2            | 0.0385381     | 1008.32        | 156986    | 1        | -336.474               | -275.339               | -25.0178               | -46.7099               | -61.0696               | -1.84062               | 2.06253                | -324.338               |
| CAMK2B    | 0.210258          | 4.08152             | 4.08152              | 1 up vs 2            | 1.96773       | 293.516        | 894.987   | 1        | -18.3571               | -5.57005               | -2.7662                | -3.54835               | -27.8102               | 3.39712                | 8.28932                | -23.6513               |
| CAMK2B    | 0.132983          | 11.2585             | 11.2585              | 1 up vs 2            | 3.01865       | 484.905        | 963.819   | 1        | -31.6815               | -3.56712               | -2.02829               | -5.1907                | -16.0753               | 3.81978                | 13.8759                | -19.9384               |
| CAMK2B    | 0.120338          | 7.5918              | 7.5918               | 1 up vs 2            | 3.27473       | 182.519        | 334.414   | 1        | -17.2122               | -4.70258               | -2.01757               | -5.50601               | -11.3709               | 2.50089                | 9.3069                 | -12.5714               |
| CAMK2B    | 0.841562          | 1.33787             | 1.33787              | 1 up vs 2            | 0.0435696     | 44.9446        | 6189.36   | 1        | -29.5722               | -6.45598               | -3.55895               | -4.44776               | -24.1395               | 3.78052                | 14.9984                | -81.2166               |
| CAMK2D    | 0.0594089         | -3.08018            | 3.08018              | 1 up vs 2            | 5.38469       | 1398.02        | 1557.77   | 1        | -47.1276               | 13.9499                | 3.0108                 | -11.6101               | -3.10288               | -1.11896               | 21.6722                | -4.05241               |
| CAMK2D    | 0.010892          | -3.76916            | 3.76916              | 1 up vs 2            | 13.2176       | 526.243        | 238.883   | 1        | -14.7442               | 4.85727                | 3.51601                | -20.6806               | -4.29586               | 1.2676                 | 10.8175                | -2.89449               |
| CAMK2D    | 0.815722          | 2.00371             | 2.00371              | 1 up vs 2            | 0.0592977     | 2.59829        | 262.906   | 1        | 3.892                  | -4.28831               | -2.32343               | 3.29377                | -14.2358               | 1.88272                | 3.2873                 | -4.42243               |
| CAMTA2    | 0.189762          | 6.94407             | 6.94407              | 1 up vs 2            | 2.18587       | 166.115        | 455.968   | 1        | -3.69798               | 2.58277                | -3.50644               | -2.28643               | -27.0035               | -6.40364               | 3.09611                | -3.68633               |
| CBLL1     | 0.0066906         | -1.41463            | 1.41463              | 1 up vs 2            | 16.4404       | 73.1274        | 26.6881   | 1        | -5.45064               | 4.38505                | 2.74478                | -2.32076               | -3.20482               | -1.29182               | 4.36392                | 2.72988                |
| CBWD7     | 0.0390394         | -15.3339            | 15.3339              | 1 up vs 2            | 6.91894       | 3677.38        | 1288.97   | 1        | -80.6529               | 3.48049                | 3.23312                | -2.27165               | -41.8002               | -1.67209               | 11.0481                | -2.53306               |
| CCDC110   | 0.116943          | -3.28563            | 3.28563              | 1 up vs 2            | 3.34992       | 3026.33        | 5420.42   | 1        | -81.5894               | -8.84964               | -5.43915               | -7.06903               | -3.7438                | 1.02677                | 24.2336                | 35.9003                |
| CCDC73    | 0.0720251         | -12.5493            | 12.5493              | 1 up vs 2            | 4.75399       | 771.664        | 973.915   | 1        | -43.8802               | 3.29858                | 2.38719                | -5.79793               | -6.69048               | 1.6389                 | 3.33159                | -3.16997               |
| CCIN      | 0.157498          | -3.81616            | 3.81616              | 1 up vs 2            | 2.60733       | 1110.81        | 2556.2    | 1        | -53.4507               | 5.91816                | -11.9828               | 2.27027                | -6.67795               | 1.49107                | 26.4737                | 3.36888                |
| CKK       | 0.231613          | 4.39842             | 4.39842              | 1 up vs 2            | 1.77085       | 210855         | 714419    | 1        | -1086.81               | -323.227               | -7.54644               | -53.4945               | -161.758               | -104.891               | -8.33357               | -49.3842               |
| CCNYL2    | 0.157943          | -1.36173            | 1.36173              | 1 up vs 2            | 2.6007        | 400.977        | 925.083   | 1        | 8.24583                | 6.45334                | -2.12357               | -31.1123               | -2.42888               | 10.4154                | 7.0806                 | 9.13409                |
| CCT8L1    | 0.016245          | -18.3903            | 18.3903              | 1 up vs 2            | 10.9429       | 809.616        | 443.912   | 1        | -35.2837               | -2.88195               | 2.06874                | -14.8269               | -9.01348               | 5.44834                | -3.26628               | 3.98941                |
| CD14      | 0.0486602         | -1.33686            | 1.33686              | 1 up vs 2            | 6.08572       | 252.142        | 248.591   | 1        | -2.67464               | 9.66525                | 2.24266                | -13.9941               | -3.23324               | -3.70759               | 3.8259                 | 12.7857                |
| CD2AP     | 0.0343696         | -3.09214            | 3.09214              | 1 up vs 2            | 7.43088       | 225.066        | 181.727   | 1        | -10.2264               | 3.54821                | 2.41343                | -3.77573               | -10.834                | -1.63229               | 12.4303                | -3.37297               |

| Gene ID | p-value (1 vs. 2) | MeanRatio (1 vs. 2) | FoldChange (1 vs. 2) | FoldChange (1 vs. 2) | F(Gene Group) | SS(Gene Group) | SS(Error) | F(Error) | FoldChange (106 vs. n) | FoldChange (111 vs. n) | FoldChange (112 vs. n) | FoldChange (121 vs. n) | FoldChange (347 vs. n) | FoldChange (353 vs. n) | FoldChange (537 vs. n) | FoldChange (563 vs. n) |
|---------|-------------------|---------------------|----------------------|----------------------|---------------|----------------|-----------|----------|------------------------|------------------------|------------------------|------------------------|------------------------|------------------------|------------------------|------------------------|
| CD34    | 0.00111267        | -1.80847            | 1.80847              | 1 up vs 2            | 34.0856       | 70.6021        | 12.4279   | 1        | -2.81321               | 2.18437                | 2.47007                | -6.56968               | -2.47127               | 1.09207                | 2.09719                | 3.08099                |
| CD36    | 0.27493           | 3.05404             | 3.05404              | 1 up vs 2            | 1.44291       | 8584.76        | 35697.6   | 1        | 223.302                | -2.05615               | 8.97696                | 82.2249                | -3.70534               | 117.111                | 30.906                 | 9.7737                 |
| CD7     | 0.0436784         | -1.42266            | 1.42266              | 1 up vs 2            | 6.4862        | 154.73         | 143.131   | 1        | 3.27954                | 2.87535                | 6.82228                | -12.3561               | -6.92699               | 1.50408                | 2.81376                | 4.73291                |
| CD93    | 0.0350606         | -1.75599            | 1.75599              | 1 up vs 2            | 7.34939       | 1800.72        | 1470.1    | 1        | -8.57407               | 14.7381                | 6.97708                | -6.95423               | -43.708                | -1.34249               | 5.09235                | 30.7581                |
| CDC42   | 0.14921           | -10.7377            | 10.7377              | 1 up vs 2            | 2.73574       | 1943.25        | 4261.92   | 1        | -82.2345               | 7.93271                | 2.29607                | -2.78867               | -3.32819               | -1.01509               | 6.76678                | -2.2669                |
| CDH11   | 1.61E-05          | -1.41751            | 1.41751              | 1 up vs 2            | 156.125       | 122.34         | 4.70159   | 1        | -3.74896               | 3.35067                | 3.96041                | -6.13941               | -4.32058               | 2.46478                | 3.91407                | 3.01654                |
| CDH29   | 0.530452          | -17.6982            | 17.6982              | 1 up vs 2            | 0.442924      | 20.6956        | 280.349   | 1        | 2.04748                | 6.36236                | -4.21567               | -7.00834               | -4.47298               | 1.00788                | 8.22163                | -10.4878               |
| CDKL5   | 0.440077          | 2.27459             | 2.27459              | 1 up vs 2            | 0.683308      | 129.307        | 1135.42   | 1        | -39.3369               | -13.1326               | -15.4169               | -2.16647               | -2.95596               | -3.59636               | 3.14216                | -3.57306               |
| CDV3    | 0.00865288        | -1.45234            | 1.45234              | 1 up vs 2            | 14.6737       | 58.3483        | 23.8583   | 1        | -4.86048               | 3.88644                | 2.06278                | -2.23116               | -2.81948               | -1.32574               | 4.38069                | 2.36953                |
| CERK    | 0.0912242         | -1.49575            | 1.49575              | 1 up vs 2            | 4.03788       | 77.2339        | 114.764   | 1        | -5.33831               | 3.28649                | 2.9708                 | -2.3421                | -3.85897               | -1.2483                | 10.6829                | -2.83393               |
| CHAF1B  | 0.0864417         | -2.7443             | 2.7443               | 1 up vs 2            | 4.19565       | 1134.08        | 1621.8    | 1        | -49.2974               | 6.1345                 | 4.88858                | 2.96352                | -7.74205               | 2.64325                | 15.1071                | 4.06797                |
| CHL1    | 0.0376498         | -2.00739            | 2.00739              | 1 up vs 2            | 7.06228       | 718.153        | 610.132   | 1        | -27.2553               | 10.3438                | 7.31005                | -7.49898               | -4.43537               | 4.94387                | 16.8187                | -6.87865               |
| CHRM1   | 0.514628          | 2.12963             | 2.12963              | 1 up vs 2            | 0.479295      | 1848.42        | 23139.2   | 1        | -74.849                | -2.01748               | -4.06758               | -20.4033               | -82.3259               | 2.15119                | 20.7234                | -155.764               |
| CIDEB   | 0.794486          | 1.9373              | 1.9373               | 1 up vs 2            | 0.0741726     | 8.49108        | 686.864   | 1        | -14.775                | 4.10588                | 3.93118                | -5.66918               | 7.24888                | -19.5864               | 5.18451                | -4.98711               |
| CLEC18C | 0.00535375        | -3.20549            | 3.20549              | 1 up vs 2            | 18.1005       | 683.135        | 226.447   | 1        | -23.5426               | 3.82005                | 2.31522                | -3.17212               | -16.932                | 4.34282                | 6.22514                | 5.99049                |
| CLEC4G  | 0.112447          | -85.2388            | 85.2388              | 1 up vs 2            | 3.45426       | 3922.4         | 6813.15   | 1        | -111.379               | 2.12569                | 3.22772                | -2.61504               | -21.6283               | -2.20203               | 4.53972                | -5.03929               |
| CLEC4M  | 0.903609          | 1.36969             | 1.36969              | 1 up vs 2            | 0.0159556     | 2.13484        | 802.794   | 1        | -2.17431               | 3.8982                 | 2.31089                | 19.3517                | -5.31738               | 19.4208                | -2.17596               | -9.02246               |
| CLIP2   | 0.14232           | -76.8308            | 76.8308              | 1 up vs 2            | 2.85035       | 55.2736        | 116.351   | 1        | -7.30668               | 2.18311                | 4.65621                | -2.29063               | -6.48185               | -7.76039               | 3.32104                | -2.05117               |
| CLMN    | 0.782962          | 1.42618             | 1.42618              | 1 up vs 2            | 0.0830026     | 62.0125        | 4482.69   | 1        | -2.4272                | -2.41342               | -4.50737               | -2.13843               | -53.1693               | -60.2594               | -2.31633               | 2.02635                |
| CLTB    | 0.315329          | 5.40713             | 5.40713              | 1 up vs 2            | 1.20003       | 32773.5        | 163864    | 1        | -466.757               | -7.86324               | -2.65714               | -2.36704               | -16.5996               | -3.87333               | 31.0544                | -167.655               |
| CMAH    | 0.0572474         | -6.01161            | 6.01161              | 1 up vs 2            | 5.51114       | 43.438         | 47.2912   | 1        | -2.29705               | -2.84433               | 2.40429                | -7.83614               | -2.24704               | -1.27366               | 2.94239                | 2.20362                |
| CMTM4   | 0.605916          | 2.03001             | 2.03001              | 1 up vs 2            | 0.296161      | 64.7474        | 1311.73   | 1        | -4.19965               | -2.56668               | -9.608                 | -2.46177               | -28.0832               | 1.68282                | 10.9851                | -29.019                |
| CNKSR2  | 0.107053          | -2.86895            | 2.86895              | 1 up vs 2            | 3.58734       | 4265.81        | 7134.77   | 1        | -3.8871                | 36.2166                | 7.07652                | -100.178               | -2.04365               | -1.58537               | 6.10066                | 13.8336                |
| CNNM1   | 0.098689          | -2.45567            | 2.45567              | 1 up vs 2            | 3.81303       | 385.378        | 606.411   | 1        | -16.6608               | -3.45928               | 2.35615                | -2.1881                | -11.7145               | 5.65289                | 22.3034                | -6.10973               |
| CNPY4   | 0.0629517         | -1.51445            | 1.51445              | 1 up vs 2            | 5.19037       | 176.914        | 204.51    | 1        | -12.7047               | -2.7495                | 5.33187                | -2.48782               | -2.35896               | 1.12958                | 12.7842                | 2.81937                |
| COL13A1 | 0.154413          | -15.8008            | 15.8008              | 1 up vs 2            | 2.654         | 5248.69        | 11865.9   | 1        | -3.73681               | 4.1026                 | 4.00229                | -138.442               | -7.09896               | -3.06603               | 7.93761                | 2.76935                |
| COL1A2  | 0.0527302         | -3.16424            | 3.16424              | 1 up vs 2            | 5.7976        | 15737.2        | 16286.6   | 1        | -166.579               | 5.64381                | 52.895                 | -3.77991               | -38.4829               | 9.10897                | 11.3911                | 30.9621                |
| CPD     | 0.00396763        | -2.03648            | 2.03648              | 1 up vs 2            | 20.5371       | 56.6573        | 16.5527   | 1        | -3.54736               | 2.29823                | 2.2977                 | -2.81056               | -4.70217               | -1.39228               | 3.79626                | 2.05171                |
| CPEB2   | 0.0370202         | 9.59386             | 9.59386              | 1 up vs 2            | 7.12959       | 62.5217        | 52.616    | 1        | -6.08335               | 2.13286                | -2.75331               | -3.71551               | -9.54046               | -3.12984               | 2.99787                | -2.60725               |
| CPLX2   | 0.113371          | -176.074            | 176.074              | 1 up vs 2            | 3.43235       | 1945.68        | 3401.19   | 1        | -78.2946               | -2.71119               | -3.23357               | -6.27184               | -11.5277               | -1.7882                | 12.0274                | -3.38484               |
| CPLX3   | 0.0753353         | 55.0953             | 55.0953              | 1 up vs 2            | 4.61302       | 1463.54        | 1903.57   | 1        | -53.5169               | -11.4515               | -10.0619               | -3.77988               | -28.0678               | 17.1764                | 9.20953                | -7.45486               |
| CPN1    | 0.843935          | 1.67747             | 1.67747              | 1 up vs 2            | 0.0422529     | 2.60784        | 370.319   | 1        | -8.34901               | 3.16642                | -4.55021               | 7.15698                | -7.56837               | 3.0586                 | -13.523                | 3.14423                |
| CPNE4   | 0.246523          | 40.7751             | 40.7751              | 1 up vs 2            | 1.64842       | 76942.7        | 280060    | 1        | -157.716               | -4.78257               | 2.08885                | -339.422               | -125.862               | -2.64916               | 345.893                | -366.015               |
| CREG2   | 0.433526          | 2.27425             | 2.27425              | 1 up vs 2            | 0.704216      | 16701.7        | 142300    | 1        | -343.379               | -12.7774               | -3.88122               | -84.8093               | -77.1516               | -7.77744               | 5.56789                | -351.466               |
| CRLF3   | 0.0174499         | -1.14021            | 1.14021              | 1 up vs 2            | 10.5674       | 169.679        | 96.3414   | 1        | -5.75883               | 6.09228                | 4.2423                 | -2.04026               | -7.40509               | -1.23456               | 10.8783                | 2.246                  |
| CRSP2   | 0.447994          | -2.35079            | 2.35079              | 1 up vs 2            | 0.658754      | 27.3325        | 248.947   | 1        | -4.81428               | 7.23955                | 9.99105                | 2.86567                | -6.08715               | -1.41863               | -6.30673               | -3.80803               |
| CSAG3   | 0.00584942        | -6.56345            | 6.56345              | 1 up vs 2            | 17.4261       | 302.617        | 104.194   | 1        | -10.1156               | 2.14728                | 3.90279                | -16.1106               | -6.84723               | 1.69794                | 5.38579                | -4.73542               |
| CSF1    | 0.12386           | -3.89931            | 3.89931              | 1 up vs 2            | 3.19977       | 86.7088        | 162.591   | 1        | 10.7169                | -4.94125               | 2.0825                 | 2.44889                | 3.07119                | -9.34028               | 2.6485                 | 2.61043                |
| CSNK1G1 | 0.00412187        | -1.48116            | 1.48116              | 1 up vs 2            | 20.2132       | 167.329        | 49.6693   | 1        | -8.8007                | 5.24247                | 2.16126                | -2.65372               | -5.46374               | 1.57883                | 8.02881                | 2.02573                |
| CTDP1   | 0.479647          | -5.47815            | 5.47815              | 1 up vs 2            | 0.567805      | 19.0525        | 201.328   | 1        | 6.54014                | -5.11822               | -4.44488               | 4.03419                | -2.48747               | 1.4691                 | 9.71328                | -4.07962               |
| CTSL1   | 0.00283216        | -1.00452            | 1.00452              | 1 up vs 2            | 23.5881       | 113.35         | 28.8325   | 1        | -3.325                 | 2.4322                 | 3.43186                | -2.32163               | -6.04244               | 1.05325                | 6.17217                | 6.30469                |
| CTSO    | 0.160595          | -13.6212            | 13.6212              | 1 up vs 2            | 2.56176       | 3841.47        | 8997.27   | 1        | -3.44212               | 3.50146                | 2.4325                 | -3.4802                | -119.581               | 1.49495                | 2.76659                | 5.28323                |
| CUGBP2  | 0.0650229         | -1.03933            | 1.03933              | 1 up vs 2            | 5.08352       | 613.433        | 724.026   | 1        | -11.074                | 4.28781                | 5.04621                | -2.54505               | -14.0357               | 9.19416                | 30.0046                | -4.18559               |
| CUGBP2  | 0.103338          | -1.77493            | 1.77493              | 1 up vs 2            | 3.68447       | 243.066        | 395.823   | 1        | -11.6783               | 2.56389                | 2.62588                | -3.12213               | -7.04759               | 1.42595                | 19.8186                | -5.91892               |
| CUL4B   | 0.135234          | -3.26047            | 3.26047              | 1 up vs 2            | 2.9766        | 6485.67        | 13073.3   | 1        | -121.403               | 68.5525                | 2.58703                | -2.84261               | -10.7814               | -1.21974               | 15.8689                | -16.7664               |
| CUX2    | 0.184399          | -4.16568            | 4.16568              | 1 up vs 2            | 2.24859       | 11386.1        | 30382     | 1        | -170.883               | -9.50402               | 28.0315                | -3.35377               | -14.287                | 100.385                | 10.2873                | -53.7724               |
| CXCL10  | 0.226375          | -2.41775            | 2.41775              | 1 up vs 2            | 1.81664       | 378.391        | 1249.75   | 1        | -3.09352               | 11.5197                | 3.89223                | -3.41502               | -23.6397               | -20.2086               | 22.1611                | 3.41817                |
| CYCSL1  | 0.0330443         | -3.03667            | 3.03667              | 1 up vs 2            | 7.59353       | 143.54         | 113.418   | 1        | -13.8276               | 4.89349                | 2.0674                 | -2.08832               | -3.83017               | 1.20735                | 4.75541                | -2.08607               |
| CYFIP1  | 0.00870903        | -1.12322            | 1.12322              | 1 up vs 2            | 14.6312       | 155.659        | 63.8331   | 1        | -8.74452               | 7.74376                | 2.18132                | -2.19005               | -3.52575               | 1.77888                | 7.7461                 | 2.00654                |
| CYP26A1 | 0.116914          | 20.9602             | 20.9602              | 1 up vs 2            | 3.35058       | 11258.1        | 20160.3   | 1        | -195.468               | -9.18526               | -4.90723               | -39.5856               | -9.05524               | 2.23453                | 3.29339                | -10.8459               |
| CYP4F12 | 0.0612419         | 15.2083             | 15.2083              | 1 up vs 2            | 5.28225       | 3530.66        | 4010.4    | 1        | 78.9845                | -5.86912               | -3.4964                | 63.116                 | -2.75699               | 3.73803                | 13.6471                | 7.25091                |
| DBC1    | 0.172551          | 5.35277             | 5.35277              | 1 up vs 2            | 2.39681       | 297.097        | 743.732   | 1        | -25.0852               | -2.24576               | -2.06075               | -7.0692                | -14.2846               | 9.75314                | 2.66789                | -22.574                |

| Gene ID  | p-value (1 vs. 2) | MeanRatio (1 vs. 2) | FoldChange (1 vs. 2) | FoldChange (1 vs. 2) | F(Gene Group) | SS(Gene Group) | SS(Error) | F(Error) | FoldChange (106 vs. n) | FoldChange (111 vs. n) | FoldChange (112 vs. n) | FoldChange (121 vs. n) | FoldChange (347 vs. n) | FoldChange (353 vs. n) | FoldChange (537 vs. n) | FoldChange (563 vs. n) |
|----------|-------------------|---------------------|----------------------|----------------------|---------------|----------------|-----------|----------|------------------------|------------------------|------------------------|------------------------|------------------------|------------------------|------------------------|------------------------|
| DCAF6    | 0.0244217         | -9.73192            | 9.73192              | 1 up vs 2            | 8.92083       | 4885.58        | 3285.96   | 1        | -61.374                | 9.15619                | 3.66635                | -2.31768               | -75.1755               | 1.04671                | 16.2724                | -6.35957               |
| DDHD1    | 0.235549          | -68.333             | 68.333               | 1 up vs 2            | 1.73743       | 1690.88        | 5839.25   | 1        | -2.49797               | -3.80536               | -17.632                | -88.3857               | 2.09291                | -1.01136               | 15.1483                | 9.46606                |
| DDN      | 0.335442          | 3.65739             | 3.65739              | 1 up vs 2            | 1.09616       | 60721.4        | 332367    | 1        | -654.915               | -15.3091               | -2.76455               | -47.9805               | -40.1364               | -1.03984               | 6.42587                | -325.911               |
| DEFB135  | 0.406114          | 11.4144             | 11.4144              | 1 up vs 2            | 0.797928      | 43.7941        | 329.309   | 1        | -2.25702               | 3.79878                | -2.71347               | 3.62956                | -17.2634               | -5.97526               | 5.61304                | -3.04339               |
| DENND4C  | 0.0501833         | -27.5283            | 27.5283              | 1 up vs 2            | 5.9742        | 59943.9        | 60202.7   | 1        | -166.057               | 4.90148                | 3.38934                | -2.65866               | -348.887               | 2.08801                | 18.8362                | 2.12259                |
| DEPDC7   | 0.0323485         | -6.93804            | 6.93804              | 1 up vs 2            | 7.68248       | 82.2478        | 64.2354   | 1        | -8.35612               | 3.65143                | 2.34011                | -3.74351               | -5.26663               | -3.8971                | 4.24139                | -2.16408               |
| DHRS7B   | 0.00560321        | -1.61237            | 1.61237              | 1 up vs 2            | 17.7511       | 70.5725        | 23.854    | 1        | -2.91981               | 4.02625                | 2.0196                 | -2.49522               | -5.94471               | -1.07113               | 3.29143                | 3.47612                |
| DHRS9    | 0.104671          | 7.84181             | 7.84181              | 1 up vs 2            | 3.64908       | 78190.1        | 128564    | 1        | -209.294               | -12.8834               | -3.70637               | -487.044               | -5.83153               | -126.962               | -3.49229               | -2.19228               |
| DHRS9    | 0.657875          | 1.77441             | 1.77441              | 1 up vs 2            | 0.216849      | 621.039        | 17183.5   | 1        | -122.058               | -3.71629               | -3.70982               | -11.3564               | 8.31283                | -99.8743               | -2.74913               | -7.45568               |
| DISC1    | 0.867903          | 1.31663             | 1.31663              | 1 up vs 2            | 0.0301301     | 135.805        | 27043.7   | 1        | 11.1211                | 2.56504                | -136.382               | -124.87                | 7.58197                | -2.51988               | -2.53109               | 4.47576                |
| DLG3     | 0.653085          | 4.64771             | 4.64771              | 1 up vs 2            | 0.223511      | 280.733        | 7536.08   | 1        | -32.5226               | 3.27705                | 2.40103                | -2.84692               | -11.4025               | 2.60668                | 45.7315                | -70.7887               |
| DLK2     | 0.126145          | -2.47684            | 2.47684              | 1 up vs 2            | 3.1527        | 36074.7        | 68654.8   | 1        | -285.918               | 3.25919                | 52.8861                | -3.27672               | -7.24435               | 1.95126                | 145.813                | -4.43577               |
| DLL3     | 0.241411          | 24.4198             | 24.4198              | 1 up vs 2            | 1.68914       | 53383.6        | 189624    | 1        | -530.185               | 7.67509                | -29.5015               | 4.88806                | -2.52013               | 3.41334                | 7.38621                | -24.997                |
| DNAH14   | 0.125145          | -1.49795            | 1.49795              | 1 up vs 2            | 3.17317       | 1821.75        | 3444.67   | 1        | -54.7638               | 6.75766                | 3.1417                 | 4.5505                 | -5.86296               | 3.49425                | 46.2832                | 2.71534                |
| DNAJB14  | 0.0540245         | -4.75743            | 4.75743              | 1 up vs 2            | 5.71221       | 38342.1        | 40273.8   | 1        | -251.018               | 108.477                | 3.52379                | -101.006               | -2.4646                | -1.35444               | 15.5508                | -2.00946               |
| DNAJC10  | 0.0020274         | -1.38426            | 1.38426              | 1 up vs 2            | 26.9734       | 129.511        | 28.8086   | 1        | -7.45773               | 4.71415                | 2.0584                 | -2.42063               | -4.59726               | 6.10111                | 3.44785                |                        |
| DNAJC3   | 0.0181196         | -1.13483            | 1.13483              | 1 up vs 2            | 10.3734       | 85.8863        | 49.677    | 1        | -3.52306               | 5.29308                | 2.62864                | -5.13069               | -2.13946               | -1.92942               | 2.90492                | 6.95418                |
| DNAL1    | 0.0296194         | -1.89572            | 1.89572              | 1 up vs 2            | 8.05793       | 284.666        | 211.965   | 1        | -4.90593               | 2.26232                | 3.57253                | -4.33455               | -14.959                | -1.93616               | 3.2818                 | 14.0951                |
| DNASE1L1 | 0.0254337         | -4.1725             | 4.1725               | 1 up vs 2            | 8.73447       | 452.591        | 310.9     | 1        | -4.42466               | 2.04784                | 2.88711                | -6.52345               | -26.6503               | 1.06163                | 5.0109                 | 4.01086                |
| DNASE2B  | 0.302586          | 24.8151             | 24.8151              | 1 up vs 2            | 1.27129       | 324.568        | 1531.84   | 1        | 2.03373                | 7.39673                | -13.6112               | -7.83357               | -5.32595               | -1.20522               | 16.1287                | -11.4713               |
| DNCL2A   | 0.300964          | 5.06443             | 5.06443              | 1 up vs 2            | 1.28069       | 46.1135        | 216.04    | 1        | -4.13419               | 2.23465                | -12.6549               | -8.0811                | -6.32282               | -3.9777                | 4.52292                | 3.77427                |
| DOLK     | 0.0197283         | -2.17025            | 2.17025              | 1 up vs 2            | 9.94421       | 238.28         | 143.77    | 1        | -3.76561               | 4.17128                | 2.84594                | -2.58265               | -16.8033               | 1.24537                | 7.00795                | 2.50896                |
| DPH3     | 0.0172846         | -1.54294            | 1.54294              | 1 up vs 2            | 10.6168       | 143.715        | 81.2194   | 1        | -9.76593               | 8.00445                | 3.17372                | -2.21243               | -3.95783               | -1.60776               | 5.09939                | 2.54432                |
| DPP10    | 0.839296          | 1.27214             | 1.27214              | 1 up vs 2            | 0.0448468     | 214.638        | 28716.2   | 1        | -108.491               | -13.4372               | -6.80156               | -8.60133               | -32.952                | 2.50547                | -3.41842               | -175.426               |
| DPPA3    | 0.107648          | -129.441            | 129.441              | 1 up vs 2            | 3.5722        | 97.2791        | 163.394   | 1        | -13.7459               | -2.2108                | 4.08142                | -4.74178               | -2.95545               | 6.47311                | -3.52427               | -4.54336               |
| DUOX1    | 0.200245          | -15.5288            | 15.5288              | 1 up vs 2            | 2.07029       | 401.724        | 1164.25   | 1        | -37.9734               | -3.01398               | -2.31736               | 2.46638                | -5.74843               | -2.88196               | -2.38996               | 15.0311                |
| DUSP5P   | 0.0946335         | -1.32861            | 1.32861              | 1 up vs 2            | 3.93217       | 7999.57        | 12206.3   | 1        | -111.891               | 57.8392                | 3.91775                | 3.63935                | -3.55158               | 8.56737                | 65.6442                | 4.28271                |
| E2F6     | 0.750037          | 2.11404             | 2.11404              | 1 up vs 2            | 0.111284      | 7.52417        | 405.675   | 1        | -5.67307               | 3.19528                | -19.5864               | -2.14463               | -3.58643               | 1.04813                | 2.70859                | 3.64362                |
| EDNRB    | 0.411546          | -1.12432            | 1.12432              | 1 up vs 2            | 0.778519      | 108.48         | 836.049   | 1        | -17.0091               | -3.64541               | -2.62016               | -10.3576               | 15.2895                | 1.74966                | 15.8943                | 6.52451                |
| EGFLAM   | 0.185215          | 6.60694             | 6.60694              | 1 up vs 2            | 2.23888       | 187.699        | 503.017   | 1        | -27.7882               | 3.14025                | 2.8606                 | -4.32561               | -3.25547               | -1.82825               | -2.85175               | -10.2431               |
| EHD4     | 0.0108635         | -1.28568            | 1.28568              | 1 up vs 2            | 13.2335       | 105.753        | 47.948    | 1        | -3.01851               | 6.91709                | 2.06028                | -5.91363               | -3.74104               | -1.74223               | 4.61041                | 4.58306                |
| EMX2     | 0.00150932        | 4.43738             | 4.43738              | 1 up vs 2            | 30.2934       | 5505.1         | 1090.36   | 1        | -56.3224               | -31.5373               | -3.98714               | -87.1244               | -66.4                  | -22.3359               | -3.04456               | -17.913                |
| EMX2     | 0.588419          | 1.91331             | 1.91331              | 1 up vs 2            | 0.326601      | 8609.81        | 158171    | 1        | -49.4463               | -331.51                | -8.91157               | -365.046               | -11.3842               | -8.33722               | -7.57697               | -14.6406               |
| ENTPD1   | 0.00595024        | -1.27963            | 1.27963              | 1 up vs 2            | 17.2983       | 66.3723        | 23.0216   | 1        | -2.76786               | 4.39828                | 2.99096                | -3.40735               | -3.84402               | -1.16247               | 4.74868                | 2.07417                |
| EPB49    | 0.511312          | 2.53909             | 2.53909              | 1 up vs 2            | 0.487194      | 73.5107        | 905.316   | 1        | -8.74976               | -27.3134               | -2.06464               | -4.8933                | -17.3461               | 1.45403                | 11.7173                | -4.13467               |
| EPHA5    | 0.746282          | 2.09226             | 2.09226              | 1 up vs 2            | 0.114805      | 14.2977        | 747.234   | 1        | -9.12462               | -2.43934               | -2.27498               | -3.01709               | -3.72709               | 11.4444                | 4.92892                | -24.2999               |
| EPHB6    | 0.133748          | 280.963             | 280.963              | 1 up vs 2            | 3.00424       | 433.058        | 864.893   | 1        | -9.8171                | -4.71595               | -4.80175               | -2.00436               | -33.9339               | 7.69228                | 10.9057                | -9.3517                |
| EPR1     | 0.00709614        | -2.23718            | 2.23718              | 1 up vs 2            | 16.0226       | 690.238        | 258.475   | 1        | -19.1722               | 15.5854                | 8.66594                | -6.31282               | -14.294                | 3.94171                | 3.48249                | -2.04072               |
| ERC1     | 0.823473          | 1.4515              | 1.4515               | 1 up vs 2            | 0.05431       | 15.9583        | 1763.03   | 1        | -3.30323               | 4.80328                | 3.33558                | -22.7053               | -2.12821               | -3.86151               | 3.91518                | -40.5002               |
| ESCO1    | 0.142365          | -11.7122            | 11.7122              | 1 up vs 2            | 2.84958       | 4136.21        | 8709.09   | 1        | -119.194               | 7.11832                | 2.36702                | -2.5871                | -8.03828               | -1.21046               | 6.93905                | 3.25961                |
| EXOC6    | 0.00547585        | -3.13747            | 3.13747              | 1 up vs 2            | 17.9268       | 244.018        | 81.6714   | 1        | -11.6729               | 5.51758                | 2.41087                | -4.20094               | -10.0785               | 1.80078                | 6.55522                | -2.49822               |
| F8       | 0.000242863       | -1.14729            | 1.14729              | 1 up vs 2            | 60.0351       | 76.6271        | 7.65823   | 1        | -5.16023               | 2.39138                | 2.67496                | -2.62918               | -2.45755               | 3.2635                 | 4.36898                | 2.18687                |
| FAAH2    | 0.418146          | 7.40149             | 7.40149              | 1 up vs 2            | 0.755509      | 64.358         | 511.11    | 1        | -5.70693               | 3.71123                | -20.7703               | -10.0319               | -4.58287               | 3.12202                | 4.63333                | 4.72768                |
| FAHD1    | 0.000800113       | -2.0195             | 2.0195               | 1 up vs 2            | 38.6463       | 124.171        | 19.278    | 1        | -4.42721               | 2.51158                | 2.05207                | -3.62419               | -8.27683               | 1.05354                | 3.32913                | 4.52912                |
| FAHD1    | 0.0185716         | -2.63323            | 2.63323              | 1 up vs 2            | 10.2478       | 215.34         | 126.08    | 1        | -3.83467               | 3.84676                | 2.86118                | -2.74077               | -16.7258               | 1.10142                | 3.87249                | 3.06634                |
| FAM103A1 | 0.00973786        | -1.49186            | 1.49186              | 1 up vs 2            | 13.9121       | 128.803        | 55.5498   | 1        | -10.5576               | 4.37754                | 2.90722                | -2.20005               | -2.12868               | 1.79379                | 5.2842                 | 2.26785                |
| FAM135A  | 0.0575785         | -2.58031            | 2.58031              | 1 up vs 2            | 5.49135       | 252.947        | 276.376   | 1        | -18.7827               | 7.64342                | 2.126                  | -3.23721               | -3.09238               | 1.243                  | 9.24952                | -4.04148               |
| FAM160B1 | 0.13451           | -1.40514            | 1.40514              | 1 up vs 2            | 2.99002       | 1131.32        | 2270.19   | 1        | -36.5432               | 2.19757                | 5.04679                | -2.9242                | -3.58457               | 1.27079                | 44.8924                | -2.34282               |
| FAM171B  | 0.105804          | -4.3769             | 4.3769               | 1 up vs 2            | 3.61948       | 2440.64        | 4045.84   | 1        | -74.5752               | 3.25886                | 2.24543                | -3.3838                | -10.1473               | -1.32714               | 33.8417                | -4.46908               |
| FAM19A1  | 0.134993          | -2.33243            | 2.33243              | 1 up vs 2            | 2.98105       | 5537.39        | 11145.2   | 1        | -84.3295               | 9.24248                | 2.74085                | -2.01777               | -27.762                | -1.21231               | 91.6442                | -20.8771               |
| FAM3C    | 0.039533          | -1.16118            | 1.16118              | 1 up vs 2            | 6.86966       | 285.114        | 249.02    | 1        | -12.4939               | 13.0255                | 2.39973                | -2.7642                | -4.61833               | 4.15556                | 12.4019                | -3.4536                |
| FAM40B   | 0.223381          | -27.8116            | 27.8116              | 1 up vs 2            | 1.8435        | 740.542        | 2410.22   | 1        | -2.55372               | -22.7845               | 4.28642                | -52.6626               | -2.33483               | 2.8605                 | 10.8634                | 8.22305                |

| Gene ID  | p-value (1 vs. 2) | MeanRatio (1 vs. 2) | FoldChange (1 vs. 2) | FoldChange (1 vs. 2) | F(Gene Group) | SS(Gene Group) | SS(Error) | F(Error) | FoldChange (106 vs. n) | FoldChange (111 vs. n) | FoldChange (112 vs. n) | FoldChange (121 vs. n) | FoldChange (347 vs. n) | FoldChange (353 vs. n) | FoldChange (537 vs. n) | FoldChange (563 vs. n) |
|----------|-------------------|---------------------|----------------------|----------------------|---------------|----------------|-----------|----------|------------------------|------------------------|------------------------|------------------------|------------------------|------------------------|------------------------|------------------------|
| FAM43B   | 0.226374          | -2.94519            | 2.94519              | 1 up vs 2            | 1.81665       | 53.68          | 177.294   | 1        | -3.85737               | -4.18237               | 2.09484                | -3.47756               | -4.64825               | -1.11404               | 12.5023                | -2.51951               |
| FAM53A   | 0.741794          | -2.51547            | 2.51547              | 1 up vs 2            | 0.119095      | 17.3597        | 874.576   | 1        | -6.36051               | 8.31228                | -8.80809               | 18.404                 | -18.5752               | -1.27949               | 2.21339                | 3.88961                |
| FANCA    | 0.40114           | -4.24104            | 4.24104              | 1 up vs 2            | 0.816084      | 21.3829        | 157.211   | 1        | -2.28749               | 5.66877                | -8.301                 | -2.84664               | -3.06388               | -3.15516               | 2.58264                | 6.42645                |
| FANCD2   | 0.353572          | 58.368              | 58.368               | 1 up vs 2            | 1.01057       | 45.165         | 268.156   | 1        | -12.3738               | 7.12387                | -7.02244               | -4.64994               | 2.04323                | -4.60551               | 6.19188                | -2.11556               |
| FASTK    | 0.0809837         | -2.17469            | 2.17469              | 1 up vs 2            | 4.39098       | 92.7803        | 126.778   | 1        | -7.69859               | 3.12559                | 8.442                  | -3.5311                | -3.22619               | -3.16792               | 6.03948                | -3.36026               |
| FBLIM1   | 0.0142854         | -2.56533            | 2.56533              | 1 up vs 2            | 11.641        | 452.169        | 233.057   | 1        | -2.1112                | 2.23754                | 2.58328                | -21.278                | -10.1316               | 1.19646                | 6.25425                | 9.50657                |
| FBXO3    | 0.0477614         | -6.26997            | 6.26997              | 1 up vs 2            | 6.15377       | 231.066        | 225.292   | 1        | -3.08148               | 2.75722                | 2.81462                | -21.1637               | -4.47724               | 2.28614                | 2.50798                | -2.73104               |
| FBXO34   | 0.0393873         | -2.05413            | 2.05413              | 1 up vs 2            | 6.88413       | 301.565        | 262.835   | 1        | -13.7039               | 4.1092                 | 2.03032                | -2.0617                | -9.82331               | 1.91456                | 15.6639                | -2.95583               |
| FCAR     | 0.10777           | -5.29727            | 5.29727              | 1 up vs 2            | 3.56911       | 1654.46        | 2781.29   | 1        | -2.64561               | 3.71205                | 3.16833                | -4.74296               | -67.5746               | 1.16993                | 11.2336                | 4.30156                |
| FCHO2    | 0.0455812         | -1.4304             | 1.4304               | 1 up vs 2            | 6.32628       | 728.574        | 690.998   | 1        | -4.79977               | 4.18066                | 9.90544                | -2.07631               | -27.9286               | 1.63701                | 2.67352                | 22.1568                |
| FGF12    | 0.455362          | -6.11789            | 6.11789              | 1 up vs 2            | 0.636576      | 219.238        | 2066.41   | 1        | -18.6682               | 3.18478                | -2.07439               | -3.70097               | -5.51314               | 1.50295                | 33.4378                | -28.4553               |
| FGF12    | 0.00993481        | -1.50049            | 1.50049              | 1 up vs 2            | 13.786        | 472.58         | 205.678   | 1        | -11.8314               | 6.44599                | 13.041                 | -3.55185               | -13.197                | 7.10249                | 8.79877                | -3.64274               |
| FGF14    | 0.44508           | 4.13915             | 4.13915              | 1 up vs 2            | 0.667703      | 3825.61        | 34377.1   | 1        | -170.774               | 5.43901                | 2.31451                | -3.14543               | -4.7582                | 14.0158                | 31.3575                | -125.073               |
| FGF20    | 0.154872          | -24.4008            | 24.4008              | 1 up vs 2            | 2.64696       | 245790         | 557144    | 1        | -93.7918               | -2.64089               | -2.61329               | -951.935               | 2.30567                | -4.09032               | 77.7713                | 2.84273                |
| FGGY     | 0.00979198        | -1.84276            | 1.84276              | 1 up vs 2            | 13.8771       | 418.568        | 180.975   | 1        | -3.16671               | 2.03091                | 2.65419                | -7.81528               | -18.0738               | 3.98835                | 5.58722                | 12.0185                |
| FKBP9L   | 0.173487          | -0.76467            | 7.06467              | 1 up vs 2            | 2.38459       | 160.262        | 403.244   | 1        | -23.2097               | 2.58975                | 2.19302                | -3.08868               | 2.00203                | -1.00515               | 5.44431                | -2.95004               |
| FLJ20397 | 0.0316154         | -1.28873            | 1.28873              | 1 up vs 2            | 7.77903       | 459.243        | 354.216   | 1        | -2.52869               | 3.85254                | 2.08931                | -18.6515               | -5.25664               | 6.97159                | 19.1504                | 2.12592                |
| FLJ21986 | 0.0428551         | -7.75647            | 7.75647              | 1 up vs 2            | 6.55835       | 576.311        | 527.246   | 1        | -2.48249               | 2.825                  | 3.53289                | -32.8096               | -11.297                | -3.39013               | 2.14459                | 4.89845                |
| FLJ25715 | 0.741641          | 13.5298             | 13.5298              | 1 up vs 2            | 0.119243      | 6.03098        | 303.463   | 1        | 4.48603                | -3.26664               | -8.34313               | 2.65396                | -12.9498               | 3.79152                | 3.74321                | 3.35936                |
| FLJ31568 | 0.478183          | -3.67198            | 3.67198              | 1 up vs 2            | 0.57177       | 46.5922        | 488.926   | 1        | -11.5438               | -12.3769               | 14.821                 | 2.70445                | -2.9144                | 2.39489                | 2.78695                | -2.29105               |
| FLJ33534 | 0.116575          | 13.2979             | 13.2979              | 1 up vs 2            | 3.35825       | 313.182        | 559.544   | 1        | -26.2422               | -9.58822               | -7.56262               | -3.56521               | -12.1174               | 2.45073                | 11.9                   | -2.45446               |
| FLJ35776 | 0.088843          | -4.50555            | 4.50555              | 1 up vs 2            | 4.11498       | 580.878        | 846.97    | 1        | -2.88276               | 2.65773                | 4.00125                | -37.2869               | -3.0429                | -2.38005               | 3.07999                | 8.62603                |
| FLJ36848 | 0.0258408         | -12.8322            | 12.8322              | 1 up vs 2            | 8.6623        | 78.2731        | 54.2164   | 1        | -6.30975               | 3.25119                | 2.25223                | -8.35133               | -3.32087               | -1.89927               | 2.71608                | -3.98471               |
| FLJ38377 | 0.082267          | 27.4775             | 27.4775              | 1 up vs 2            | 4.34347       | 219.889        | 303.751   | 1        | -21.0157               | -2.53789               | 2.38983                | -2.02792               | -10.6713               | -9.03782               | 5.07151                | 2.06937                |
| FLJ39632 | 0.203049          | -1.33458            | 1.33458              | 1 up vs 2            | 2.04084       | 12471.2        | 36665     | 1        | -185.159               | 54.3985                | 6.34649                | 48.7521                | -3.45867               | 35.1371                | 90.7609                | -11.9744               |
| FLJ42709 | 0.0144438         | -3.38825            | 3.38825              | 1 up vs 2            | 11.5799       | 1617.2         | 837.938   | 1        | -17.4298               | 8.44358                | 2.54354                | -12.5018               | -38.0963               | 5.19319                | 23.4566                | -6.17421               |
| FLJ45121 | 0.247218          | 57.0799             | 57.0799              | 1 up vs 2            | 1.64297       | 1263.24        | 4613.23   | 1        | -3.8867                | 2.20941                | -14.6274               | -78.8813               | 3.51078                | -2.06394               | -2.89909               | 15.0668                |
| FLJ46154 | 0.125641          | -1.99484            | 1.99484              | 1 up vs 2            | 3.16298       | 75.9384        | 144.051   | 1        | -3.86787               | -4.49925               | 2.84326                | -6.75338               | -2.09579               | -1.03922               | 2.33253                | 10.9876                |
| FLRT2    | 0.215964          | 7.79052             | 7.79052              | 1 up vs 2            | 1.91237       | 131.855        | 413.69    | 1        | -12.7069               | -2.16357               | 2.036                  | 2.05573                | -18.2112               | 4.20801                | 2.69988                | -12.955                |
| FNIP1    | 0.424255          | 11.4883             | 11.4883              | 1 up vs 2            | 0.734756      | 615.9          | 5029.43   | 1        | -18.9889               | 4.69707                | 4.31343                | 76.0596                | 2.48543                | 2.04888                | -4.88765               | 2.46837                |
| FNIP2    | 0.0105302         | -2.62056            | 2.62056              | 1 up vs 2            | 1.34243       | 197.526        | 88.2841   | 1        | -5.72605               | 2.14812                | 3.06633                | -2.05851               | -14.5024               | 1.00753                | 4.11629                | 3.83613                |
| FOXO1    | 0.54787           | -2.26598            | 2.26598              | 1 up vs 2            | 0.405296      | 83.8362        | 1241.11   | 1        | -5.70374               | 7.95456                | 17.0468                | -12.0847               | 3.87038                | -24.1659               | 13.3908                | -3.99827               |
| FOXO3    | 0.0951124         | -5.52275            | 5.52275              | 1 up vs 2            | 3.91774       | 5140.17        | 7872.14   | 1        | -12.1393               | 10.4527                | 9.13332                | -115.852               | -5.00325               | 1.19005                | 17.249                 | 2.11032                |
| FREM2    | 0.426763          | -1.11964            | 1.11964              | 1 up vs 2            | 0.726383      | 277.04         | 2288.38   | 1        | -10.0505               | 29.0931                | -34.2874               | -3.84584               | -5.36595               | 10.913                 | 7.78224                | 15.1724                |
| FRMPD2   | 0.121959          | -41.6427            | 41.6427              | 1 up vs 2            | 3.23987       | 1848.04        | 3422.43   | 1        | -77.3629               | 6.52431                | 4.64439                | -7.85614               | -6.756                 | -1.25973               | 2.69322                | -8.92107               |
| FRMPD2   | 0.146035          | 4.99431             | 4.99431              | 1 up vs 2            | 2.78761       | 1449.09        | 3119.01   | 1        | -71.9373               | 4.98289                | -33.16                 | -23.8817               | -8.46141               | -3.48038               | 2.14639                | -5.28865               |
| FUCA1    | 0.00175523        | -1.14235            | 1.14235              | 1 up vs 2            | 28.5543       | 229.28         | 48.1778   | 1        | -4.35962               | 5.65614                | 5.47754                | -3.71651               | -9.61324               | 2.28819                | 9.06729                | 3.31933                |
| GABBR2   | 0.151276          | -6.02527            | 6.02527              | 1 up vs 2            | 2.70282       | 36669.3        | 81402.4   | 1        | -341.856               | 5.91108                | 2.8763                 | -4.42818               | -13.5358               | 20.2843                | 92.3927                | -21.9335               |
| GABRA5   | 0.304068          | 5.95927             | 5.95927              | 1 up vs 2            | 1.26277       | 549084         | 2.61E+06  | 1        | -1897.43               | 9.98353                | 3.68446                | -5.77497               | -47.6074               | 12.757                 | 6.07796                | -578.099               |
| GABRD    | 0.250418          | -1.05387            | 1.05387              | 1 up vs 2            | 1.61821       | 967.508        | 3587.32   | 1        | -14.1785               | 2.04484                | -5.88228               | -13.2685               | -7.52031               | 1.1231                 | 64.0071                | -5.99296               |
| GAD1     | 0.204733          | -28.1412            | 28.1412              | 1 up vs 2            | 2.02343       | 1.03E+06       | 3.06E+06  | 1        | -3.15797               | 45.6296                | 4.87093                | -2141.5                | -2.92307               | 3.06055                | 86.8784                | -13.2488               |
| GAD1     | 0.108696          | -21.1209            | 21.1209              | 1 up vs 2            | 3.54584       | 116335         | 196853    | 1        | -78.4394               | 13.9555                | 2.48376                | -598.118               | -36.9278               | 2.60611                | 41.1047                | -3.84833               |
| GAD2     | 0.0679275         | -7.7084             | 7.7084               | 1 up vs 2            | 4.94122       | 58872.1        | 71486.9   | 1        | -321.403               | 3.0425                 | -29.8026               | -59.2811               | -89.8611               | -4.33623               | 173.032                | -40.1971               |
| GALNT9   | 0.026437          | -7.10311            | 7.10311              | 1 up vs 2            | 8.55929       | 1305.67        | 915.264   | 1        | -40.6985               | 12.8603                | 2.01299                | -6.39688               | -22.3005               | 4.48149                | 8.0743                 | -11.1461               |
| GBA      | 0.0119669         | -1.2265             | 1.2265               | 1 up vs 2            | 12.654        | 66.1893        | 31.3842   | 1        | -3.18551               | 2.48255                | 3.42721                | -2.05868               | -4.57464               | -1.70358               | 3.77303                | 5.36339                |
| GCC2     | 0.10134           | -10.4127            | 10.4127              | 1 up vs 2            | 3.73872       | 332.047        | 532.879   | 1        | -29.995                | 2.51931                | 2.73327                | -3.04879               | -3.38089               | -2.453                 | 5.8209                 | -2.79033               |
| GCET2    | 0.0811678         | -2.41861            | 2.41861              | 1 up vs 2            | 4.3841        | 471.4          | 645.148   | 1        | -2.2538                | 5.50624                | 2.16275                | -28.2974               | -3.10238               | -3.00015               | 16.3057                | 2.21622                |
| GCNT1    | 0.0193066         | -2.33536            | 2.33536              | 1 up vs 2            | 10.0521       | 721.201        | 430.48    | 1        | -10.353                | 10.5975                | 4.3515                 | -28.4993               | -2.34416               | 1.06551                | 10.0257                | 3.3603                 |
| GDAP1    | 0.90949           | 1.25605             | 1.25605              | 1 up vs 2            | 0.0140575     | 17.1887        | 7336.44   | 1        | -34.7392               | 16.2694                | 2.36114                | -4.45871               | -5.35959               | -4.60697               | 10.7295                | -83.8768               |
| GGA1     | 0.0653746         | -1.54965            | 1.54965              | 1 up vs 2            | 5.06584       | 1124.21        | 1331.52   | 1        | -10.7893               | 33.5422                | 17.1092                | -4.83381               | -29.0244               | -2.61434               | 5.00683                | -5.02499               |
| GGTL3    | 0.233447          | 113.765             | 113.765              | 1 up vs 2            | 1.75518       | 859919         | 2.94E+06  | 1        | -30.5216               | -9.17781               | 4.03635                | -2.47899               | 2082.67                | -2.54627               | 39.9623                | -2.24664               |
| GJB6     | 0.118581          | 48.2071             | 48.2071              | 1 up vs 2            | 3.31328       | 61861.5        | 112025    | 1        | -452.763               | -26.4926               | -3.89438               | -95.4067               | -8.29092               | -2.5337                | 19.7292                | -6.04708               |

| Gene ID  | p-value (1 vs. 2) | MeanRatio (1 vs. 2) | FoldChange (1 vs. 2) | FoldChange (1 vs. 2) | F(Gene Group) | SS(Gene Group) | SS(Error) | F(Error) | FoldChange (106 vs. n) | FoldChange (111 vs. n) | FoldChange (112 vs. n) | FoldChange (121 vs. n) | FoldChange (347 vs. n) | FoldChange (353 vs. n) | FoldChange (537 vs. n) | FoldChange (563 vs. n) |
|----------|-------------------|---------------------|----------------------|----------------------|---------------|----------------|-----------|----------|------------------------|------------------------|------------------------|------------------------|------------------------|------------------------|------------------------|------------------------|
| GLRX3    | 0.00877127        | -1.82171            | 1.82171              | 1 up vs 2            | 14.5845       | 159.984        | 65.8167   | 1        | -10.3105               | 4.45299                | 4.15268                | -2.60596               | -4.97418               | -1.0974                | 6.7456                 | 2.11414                |
| GLYCTK   | 0.00415096        | -3.43778            | 3.43778              | 1 up vs 2            | 20.1539       | 293.669        | 87.4281   | 1        | -7.5943                | 2.86297                | 2.73969                | -4.54693               | -16.9433               | 1.79879                | 2.26259                | 4.43642                |
| GNAO1    | 0.533886          | 1.49272             | 1.49272              | 1 up vs 2            | 0.435311      | 15.1226        | 208.439   | 1        | -11.6902               | -10.6775               | -3.45719               | -2.15678               | -11.9645               | -3.76942               | 2.03991                | -12.9551               |
| GNG3     | 0.50804           | 2.33301             | 2.33301              | 1 up vs 2            | 0.495083      | 202.767        | 2457.37   | 1        | -37.4732               | -8.35515               | -2.77308               | -4.1258                | -13.0022               | 9.58171                | 6.70818                | -44.1679               |
| GPAT2    | 0.0326173         | -90.7193            | 90.7193              | 1 up vs 2            | 7.64782       | 4776.46        | 3747.31   | 1        | -84.8843               | -4.20391               | 2.6408                 | -3.62608               | -61.2554               | -6.24223               | -2.94871               | 13.5055                |
| GPATCH1  | 0.216491          | -281.626            | 281.626              | 1 up vs 2            | 1.90737       | 931584         | 2.93E+06  | 1        | -2100.07               | 12.5689                | -4.13823               | -2.29238               | -4.77238               | -1.48938               | 3.42495                | 2.1038                 |
| GPR22    | 0.212554          | -102.191            | 102.191              | 1 up vs 2            | 1.94519       | 3.38E+06       | 1.04E+07  | 1        | -3965.91               | 41.0117                | 11.0432                | -8.73342               | -14.3319               | 13.3204                | 13.2959                | -13.6138               |
| GPR34    | 0.0506036         | -2.91913            | 2.91913              | 1 up vs 2            | 5.94423       | 399.231        | 402.976   | 1        | -2.90866               | 6.7171                 | 8.68609                | -25.1177               | -4.57954               | -4.15638               | 4.50383                | 2.86559                |
| GPT      | 0.190279          | -2.7661             | 2.7661               | 1 up vs 2            | 2.17996       | 5261.52        | 14481.5   | 1        | 3.60383                | 2.10662                | -6.5939                | 2.95934                | -123.285               | 2.04694                | 4.04751                | 68.7217                |
| GREM2    | 0.181769          | 69.7287             | 69.7287              | 1 up vs 2            | 2.2803        | 32257.3        | 84876.4   | 1        | -369.373               | 4.98476                | -2.5032                | -15.4826               | -14.3604               | 1.56091                | 15.69                  | -29.2746               |
| GRIN1    | 0.380065          | -16.8605            | 16.8605              | 1 up vs 2            | 0.897356      | 2447.32        | 16363.5   | 1        | -86.3219               | -3.1705                | 5.12124                | -5.79033               | -10.2036               | -3.66249               | 83.9025                | -72.0768               |
| GRIN1    | 0.39322           | 4.05882             | 4.05882              | 1 up vs 2            | 0.845782      | 1328.7         | 9425.82   | 1        | -93.1603               | -2.3389                | 3.49408                | -3.16646               | -9.64245               | -7.73514               | 26.2893                | -63.2233               |
| GRLF1    | 0.187434          | 10.8018             | 10.8018              | 1 up vs 2            | 2.21278       | 196.183        | 531.955   | 1        | -26.8474               | 7.02978                | -7.43042               | -4.72081               | -2.24935               | -4.87188               | 4.61614                | -4.56153               |
| GRM1     | 0.209911          | 36.9105             | 36.9105              | 1 up vs 2            | 1.97116       | 18078.5        | 55029.1   | 1        | -280.878               | -5.14001               | -46.0163               | -2.35463               | -19.5499               | 1.78757                | 60.045                 | -24.3482               |
| H6PD     | 0.31886           | 81.9031             | 81.9031              | 1 up vs 2            | 1.18106       | 46.0409        | 233.896   | 1        | -4.01115               | -2.53605               | -4.33771               | 15.4067                | 3.65415                | 2.05741                | 2.51866                | 2.60394                |
| HCG4     | 0.000498661       | -1.15838            | 1.15838              | 1 up vs 2            | 46.1274       | 86.9433        | 11.3091   | 1        | -4.00359               | 3.12424                | 2.25553                | -2.23189               | -4.72882               | 1.73515                | 4.08539                | 4.93436                |
| HCN1     | 0.164635          | 8.81363             | 8.81363              | 1 up vs 2            | 2.50413       | 715.368        | 1714.05   | 1        | -54.5474               | -8.23888               | 2.12377                | -6.84229               | -4.70817               | -3.48383               | 4.40108                | -7.30132               |
| HDAC7A   | 0.130887          | -4.08855            | 4.08855              | 1 up vs 2            | 3.0587        | 85.396         | 167.514   | 1        | -3.91106               | -8.78811               | 4.65027                | -3.45538               | -8.90083               | 1.30736                | 2.20805                | 7.25366                |
| HECW1    | 0.115016          | -24.1757            | 24.1757              | 1 up vs 2            | 3.39396       | 54941.2        | 97127.7   | 1        | -70.1204               | 5.83564                | 2.99541                | -7.56729               | -415.449               | 19.6477                | 16.969                 | -11.451                |
| HIGD1C   | 0.89018           | 1.28529             | 1.28529              | 1 up vs 2            | 0.0207494     | 0.511996       | 148.051   | 1        | 4.88942                | 3.66529                | -2.50782               | -1.86177               | -2.30034               | -1.86172               | -3.93273               | -4.22139               |
| HIST1H4A | 0.0398555         | -8.1882             | 8.1882               | 1 up vs 2            | 6.83791       | 1090.73        | 957.077   | 1        | 2.59946                | -3.16                  | -2.0424                | 21.3132                | 40.5693                | -15.1591               | 3.12467                | 4.11186                |
| HIST2H4B | 0.143525          | -4.0629             | 4.0629               | 1 up vs 2            | 2.82975       | 4096.28        | 8685.48   | 1        | -113.3                 | 9.24391                | 14.4321                | 3.0963                 | -2.32215               | 4.01479                | 9.36593                | 9.10321                |
| HMGCLL1  | 0.0633832         | -7.18173            | 7.18173              | 1 up vs 2            | 5.16772       | 885.686        | 1028.33   | 1        | -34.9426               | -4.62419               | 2.35524                | -2.13154               | -20.1586               | -1.11237               | 21.6841                | -5.02076               |
| HNRNPCL1 | 0.213766          | 18.8923             | 18.8923              | 1 up vs 2            | 1.93344       | 42.4924        | 131.865   | 1        | -4.08929               | 5.50939                | -3.31145               | -5.94603               | -5.04446               | -3.51353               | 6.19066                | -6.2054                |
| HOXA3    | 0.318572          | -30.3648            | 30.3648              | 1 up vs 2            | 1.18259       | 2812.38        | 14268.9   | 1        | -2.03368               | 2.1465                 | 3.44032                | 23.251                 | -133.7                 | 1.96461                | -5.803                 | 4.42554                |
| HPS4     | 0.060471          | -47.4928            | 47.4928              | 1 up vs 2            | 5.32482       | 174.397        | 196.51    | 1        | -17.4845               | 2.52353                | -5.73346               | -2.26954               | -8.58207               | 1.21727                | 5.65638                | -2.66932               |
| HPS4     | 0.0139813         | -3.80466            | 3.80466              | 1 up vs 2            | 11.7608       | 1352.5         | 690.001   | 1        | -35.0875               | -3.43554               | 11.5025                | -23.494                | -5.22171               | 2.20518                | 15.4569                | 2.22052                |
| HRH3     | 0.847181          | 1.27016             | 1.27016              | 1 up vs 2            | 0.0404862     | 1.7542         | 259.97    | 1        | -12.9642               | -6.05732               | -10.034                | 2.18446                | -2.86274               | -4.77469               | 5.98222                | -3.01743               |
| 13365    | 0.101422          | -1.33465            | 1.33465              | 1 up vs 2            | 3.73648       | 792.684        | 1272.88   | 1        | -26.1012               | 32.4568                | -3.51503               | -4.73544               | -4.42606               | 1.2866                 | 16.6279                | -2.82122               |
| 13457    | 0.172931          | 20.6022             | 20.6022              | 1 up vs 2            | 2.39184       | 2628.97        | 6594.86   | 1        | -102.356               | -20.5933               | 3.86931                | -4.95348               | -10.7559               | 4.81072                | 10.605                 | -8.24292               |
| 13520    | 0.121653          | -1.9154             | 1.9154               | 1 up vs 2            | 3.24639       | 309.974        | 572.897   | 1        | -18.4384               | 4.67779                | 2.45951                | -4.611                 | -2.29284               | -1.81671               | 21.5286                | -4.79793               |
| 13587    | 0.167248          | -20.9879            | 20.9879              | 1 up vs 2            | 2.46792       | 8043.98        | 19556.5   | 1        | -176.574               | 2.02024                | 4.79439                | -5.67285               | -5.31361               | -1.40791               | 7.42042                | 2.06718                |
| 13689    | 0.756887          | 1.60019             | 1.60019              | 1 up vs 2            | 0.105019      | 67.9654        | 3883.04   | 1        | 48.3793                | -2.84938               | -3.13092               | 2.67314                | -2.89687               | -1.50995               | 52.5013                | 5.14499                |
| 13706    | 0.0811554         | -2.35465            | 2.35465              | 1 up vs 2            | 4.38457       | 22904.3        | 31343.1   | 1        | -202.239               | 4.45971                | 3.14181                | -7.58803               | -22.9062               | 93.68                  | 67.249                 | -3.7973                |
| 13765    | 0.0345816         | -1.30842            | 1.30842              | 1 up vs 2            | 7.40564       | 63.9438        | 51.8068   | 1        | -2.51987               | 4.0537                 | -2.46532               | -2.75462               | -4.65558               | 1.08899                | 3.02996                | 6.94159                |
| 13770    | 0.389199          | 12.8023             | 12.8023              | 1 up vs 2            | 0.861244      | 6256.01        | 43583.5   | 1        | -7.65737               | 3.08598                | 15.3566                | -36.3707               | 231.999                | -1.49688               | 3.97929                | 3.54605                |
| 13870    | 0.961858          | 1.25804             | 1.25804              | 1 up vs 2            | 0.00248532    | 0.196974       | 475.531   | 1        | 3.0859                 | 2.60197                | -19.0412               | -4.1027                | -3.72382               | -2.00362               | 4.78224                | 7.38017                |
| 13892    | 0.413934          | -3.60557            | 3.60557              | 1 up vs 2            | 0.770121      | 62.2892        | 485.294   | 1        | 2.60167                | 3.55142                | -2.69211               | 5.37829                | -21.5168               | -1.92977               | 2.06599                | 5.26185                |
| 13931    | 0.177479          | 12.645              | 12.645               | 1 up vs 2            | 2.33346       | 20988.3        | 53967     | 1        | -301.663               | -5.16664               | -7.32087               | -2.53487               | -40.4606               | -34.6352               | -4.19341               | 5.88852                |
| 14092    | 0.0728531         | 12.5634             | 12.5634              | 1 up vs 2            | 4.71791       | 3781.68        | 4809.34   | 1        | -97.5272               | -2.45439               | -4.83091               | -5.67792               | -43.1758               | 7.96589                | -22.7868               |                        |
| 14130    | 0.00780417        | -4.34045            | 4.34045              | 1 up vs 2            | 15.3645       | 623.344        | 243.422   | 1        | -19.8631               | 5.20928                | 3.76504                | -6.86541               | -17.7286               | -1.61232               | 12.3875                | -2.67863               |
| 14207    | 0.104307          | -1.90521            | 1.90521              | 1 up vs 2            | 3.65867       | 1259.06        | 2064.78   | 1        | -39.912                | 3.05858                | 3.10517                | -4.61317               | -6.45586               | 1.26367                | 40.5122                | -3.34175               |
| 14367    | 0.141349          | -7.78656            | 7.78656              | 1 up vs 2            | 2.86712       | 12038.7        | 25193.3   | 1        | -10.1268               | 23.8794                | -4.39514               | -198.579               | -4.3222                | 23.6803                | 4.95543                | -2.52263               |
| 14371    | 0.450714          | 3.04722             | 3.04722              | 1 up vs 2            | 0.650491      | 109.745        | 1012.27   | 1        | -2.0232                | 4.29222                | -4.96867               | -34.9259               | -2.78638               | -1.82129               | -2.52587               | -13.6616               |
| 14435    | 0.164593          | -13.6976            | 13.6976              | 1 up vs 2            | 2.50473       | 61.4035        | 147.09    | 1        | -5.06065               | 2.16597                | -2.09992               | 2.32912                | -13.2683               | 1.99603                | 2.49237                | -2.60766               |
| 14496    | 0.232657          | 45.7466             | 45.7466              | 1 up vs 2            | 1.76191       | 93949.1        | 319934    | 1        | -8.02742               | 3.3145                 | 8.92442                | 3.9594                 | 690.608                | 4.70829                | 5.84534                | 2.21988                |
| 14503    | 0.135388          | -2.1026             | 2.1026               | 1 up vs 2            | 2.97375       | 1821.23        | 3674.61   | 1        | -50.6681               | 3.82084                | 2.25245                | -2.57726               | -10.1174               | 8.14399                | 50.4608                | -14.4523               |
| 14509    | 0.00765264        | -1.37148            | 1.37148              | 1 up vs 2            | 15.4985       | 41.7097        | 16.1473   | 1        | -2.50268               | 3.10114                | 2.51142                | -2.88688               | -2.79338               | -1.46925               | 3.58466                | 2.21619                |
| 14517    | 0.000808763       | -1.49886            | 1.49886              | 1 up vs 2            | 38.4895       | 300.773        | 46.8865   | 1        | -9.89077               | 3.8995                 | 4.28874                | -8.90718               | -3.99282               | 2.66287                | 9.44529                | 5.04598                |
| 14546    | 0.922882          | 1.40283             | 1.40283              | 1 up vs 2            | 0.0101902     | 1.60338        | 944.069   | 1        | -5.4683                | 2.63044                | 2.25357                | -2.19059               | -2.00205               | -12.2877               | 17.8568                | -21.931                |
| 14623    | 0.597105          | 2.3757              | 2.3757               | 1 up vs 2            | 0.31124       | 1340.47        | 25841.3   | 1        | -125.557               | -3.76341               | -3.66146               | -4.33692               | -8.62771               | 2.38225                | 37.569                 | -129.706               |
| 14741    | 0.355102          | -1.08362            | 1.08362              | 1 up vs 2            | 1.00366       | 25.603         | 153.058   | 1        | -2.66631               | -2.00217               | 2.38835                | 2.39398                | -5.49301               | 1.11378                | 10.7107                | -3.34327               |

| Gene ID  | p-value (1 vs. 2) | MeanRatio (1 vs. 2) | FoldChange (1 vs. 2) | FoldChange (1 vs. 2) | F(Gene Group) | SS(Gene Group) | SS(Error) | F(Error) | FoldChange (106 vs. n) | FoldChange (111 vs. n) | FoldChange (112 vs. n) | FoldChange (121 vs. n) | FoldChange (347 vs. n) | FoldChange (353 vs. n) | FoldChange (537 vs. n) | FoldChange (563 vs. n) |
|----------|-------------------|---------------------|----------------------|----------------------|---------------|----------------|-----------|----------|------------------------|------------------------|------------------------|------------------------|------------------------|------------------------|------------------------|------------------------|
| 14773    | 0.0236965         | -2.11184            | 2.11184              | 1 up vs 2            | 9.06089       | 317.438        | 210.203   | 1        | -11.1761               | 4.01412                | 3.67539                | -2.69013               | -12.6245               | 2.85643                | 13.7991                | -3.43852               |
| 14896    | 0.00866453        | -2.15045            | 2.15045              | 1 up vs 2            | 14.6648       | 181.728        | 74.3526   | 1        | -4.08147               | 2.13925                | 9.3113                 | -9.11602               | -6.9624                | -1.5885                | 2.96245                | 2.80007                |
| 15065    | 0.0497112         | -1.00891            | 1.00891              | 1 up vs 2            | 6.00827       | 233.117        | 232.796   | 1        | 2.07691                | 2.96915                | 6.08389                | -2.01551               | -16.861                | 2.08259                | 8.21401                | 8.40251                |
| 15072    | 4.59E-05          | -1.47616            | 1.47616              | 1 up vs 2            | 108.464       | 74.4199        | 4.11675   | 1        | -3.57635               | 3.41826                | 2.07803                | -3.18494               | -4.506                 | 1.21455                | 3.1087                 | 2.90189                |
| 15120    | 0.18805           | -11.8519            | 11.8519              | 1 up vs 2            | 2.20561       | 49887.6        | 135711    | 1        | 2.67076                | 4.18873                | 2.4962                 | -450.324               | -3.61815               | 4.39426                | 16.9282                | 35.4522                |
| 15229    | 0.291811          | 6.30563             | 6.30563              | 1 up vs 2            | 1.33522       | 258.619        | 1162.14   | 1        | 6.39697                | -3.1581                | 3.32032                | 39.9761                | -4.4993                | -2.05749               | 7.62182                | 5.34128                |
| 15275    | 0.659007          | -2.29687            | 2.29687              | 1 up vs 2            | 0.215293      | 13.3734        | 372.703   | 1        | -4.14617               | 15.7233                | -8.22983               | 2.13643                | -3.57209               | -2.45046               | 3.4027                 | -4.3954                |
| 15280    | 0.0230844         | -1.49764            | 1.49764              | 1 up vs 2            | 9.18366       | 90.1708        | 58.9117   | 1        | -5.7166                | 2.67378                | 8.58928                | -2.4441                | -4.31402               | -1.55594               | 2.04905                | 2.12651                |
| 15310    | 0.147735          | -10.9077            | 10.9077              | 1 up vs 2            | 2.75964       | 6303.25        | 13704.5   | 1        | -8.38966               | -2.61952               | 2.50399                | -3.1642                | -147.78                | 3.59156                | 18.2557                | 2.61414                |
| 15316    | 0.865657          | 1.42951             | 1.42951              | 1 up vs 2            | 0.0311762     | 1.28622        | 247.539   | 1        | -2.42501               | -12.7614               | -7.78318               | -2.02489               | -3.8198                | 4.332                  | 2.75209                | 3.81886                |
| 15440    | 0.60494           | 2.32994             | 2.32994              | 1 up vs 2            | 0.297807      | 67.3037        | 1355.99   | 1        | -31.7285               | -26.8317               | 2.36371                | 4.06026                | -3.82028               | 2.96405                | 2.26055                | -3.28113               |
| 15455    | 0.323164          | -1.09818            | 1.09818              | 1 up vs 2            | 1.15837       | 496.789        | 2573.21   | 1        | -19.3282               | 2.42618                | 9.87883                | -4.2139                | -2.0165                | 34.4298                | 22.2573                | -30.2027               |
| 15468    | 0.0216856         | -5.74535            | 5.74535              | 1 up vs 2            | 9.48138       | 1887.19        | 1194.25   | 1        | -40.6574               | 2.55928                | 18.4023                | -2.42766               | -37.9813               | -1.84919               | 6.42295                | -2.01884               |
| 15472    | 0.317795          | -4.27282            | 4.27282              | 1 up vs 2            | 1.18674       | 22.2155        | 112.318   | 1        | -2.9955                | 5.23446                | 2.58105                | -2.77849               | -2.59398               | 1.18913                | 2.71608                | -8.45669               |
| 15513    | 0.231422          | 3.93138             | 3.93138              | 1 up vs 2            | 1.7725        | 69.2318        | 234.353   | 1        | -16.8166               | 2.70385                | -9.64857               | -4.96638               | -2.6652                | -2.11696               | 3.51833                | -4.8212                |
| 15518    | 0.460419          | 2.98357             | 2.98357              | 1 up vs 2            | 0.621718      | 1532.66        | 14791.2   | 1        | 4.34342                | -2.32167               | 81.5033                | 3.51505                | 121.154                | -1.16679               | -3.77667               | -2.16996               |
| 15536    | 0.0566168         | -1.03971            | 1.03971              | 1 up vs 2            | 5.54926       | 274.823        | 297.146   | 1        | -2.71618               | 2.97809                | 20.1511                | -6.86105               | -8.93638               | -1.80753               | 4.4272                 | 3.92865                |
| 15543    | 0.186797          | -2.28576            | 2.28576              | 1 up vs 2            | 2.22023       | 322.826        | 872.414   | 1        | -18.3375               | -3.4662                | 4.78772                | -4.68778               | -4.35893               | -3.47731               | 27.3884                | -5.2654                |
| 15565    | 0.0375744         | -4.39076            | 4.39076              | 1 up vs 2            | 7.07025       | 4102.46        | 3481.45   | 1        | -46.0816               | 2.76861                | 31.4542                | -70.778                | 2.56326                | -1.9989                | 7.76379                | 3.39746                |
| 15576    | 0.707048          | 2.02154             | 2.02154              | 1 up vs 2            | 0.15541       | 45.946         | 1773.86   | 1        | -4.62274               | 6.02415                | -2.44147               | -2.4386                | -22.3267               | -39.0817               | 8.81476                | 2.45521                |
| 15914    | 0.08487           | -6.73763            | 6.73763              | 1 up vs 2            | 4.25013       | 1313.07        | 1853.69   | 1        | -57.3465               | 2.80146                | 3.55149                | -7.74329               | -4.03973               | -2.38207               | 10.3002                | 2.82927                |
| 15990    | 0.385791          | -6.59788            | 6.59788              | 1 up vs 2            | 0.874554      | 58.1873        | 399.202   | 1        | -19.1491               | -2.47217               | -3.01088               | 2.58198                | 2.05447                | -2.05233               | 3.11112                | 8.09025                |
| 16226    | 0.412866          | 6.6035              | 6.6035               | 1 up vs 2            | 0.773865      | 378.128        | 2931.74   | 1        | -5.62993               | -19.4656               | 6.75927                | 11.6952                | -56.2712               | 5.4572                 | -2.53617               | -2.88625               |
| 16242    | 0.0396415         | -1.55776            | 1.55776              | 1 up vs 2            | 6.85894       | 408.428        | 357.281   | 1        | -16.3879               | 8.55866                | 3.32573                | -2.33031               | -8.24795               | 4.9945                 | 17.0136                | -5.04105               |
| 16431    | 0.00224128        | -1.61303            | 1.61303              | 1 up vs 2            | 25.9176       | 119.183        | 27.5912   | 1        | -4.76374               | 6.99216                | 2.34012                | -3.06182               | -6.93919               | 1.38683                | 2.22348                | 2.31311                |
| 16578    | 0.197965          | -6.71097            | 6.71097              | 1 up vs 2            | 2.09468       | 3387.24        | 9702.39   | 1        | -97.0989               | 6.34343                | 4.17373                | -2.00324               | -11.8715               | 5.51468                | 51.7625                | -40.2341               |
| 16587    | 0.0791036         | -3.86604            | 3.86604              | 1 up vs 2            | 4.46248       | 1327.9         | 1785.42   | 1        | -5.09764               | 2.0815                 | 4.23347                | -54.7873               | -3.54499               | 1.95062                | 13.2692                | 5.81014                |
| HSD17B11 | 0.145173          | -16.2706            | 16.2706              | 1 up vs 2            | 2.80197       | 22171.9        | 47477.8   | 1        | -279.695               | 8.58079                | 15.3308                | -4.40903               | -23.2351               | 2.78423                | 7.15176                | -2.36553               |
| HSPA12A  | 0.249432          | -8.33492            | 8.33492              | 1 up vs 2            | 1.62579       | 490.501        | 1810.2    | 1        | 7.41721                | 2.8959                 | 12.4471                | -4.70269               | -46.0388               | -1.81208               | 3.71951                | -8.58722               |
| HYPB     | 0.0728569         | -1.2911             | 1.2911               | 1 up vs 2            | 4.71775       | 77.328         | 98.3452   | 1        | -4.52537               | 9.12628                | 3.29089                | -4.01913               | -2.31239               | 3.57387                | 2.62421                | -4.60026               |
| IDE      | 0.0303674         | -1.46813            | 1.46813              | 1 up vs 2            | 7.95052       | 558.949        | 421.821   | 1        | -5.01527               | 12.6915                | 2.69644                | -2.14537               | -23.6502               | -1.03262               | 7.88134                | 12.7407                |
| IFITM4P  | 0.0033027         | -1.59724            | 1.59724              | 1 up vs 2            | 22.1543       | 636.13         | 172.282   | 1        | -6.69085               | 4.10877                | 8.20653                | -6.12868               | -21.1627               | 6.84572                | 10.8498                | 5.44849                |
| IGDCC3   | 0.296783          | -47.4802            | 47.4802              | 1 up vs 2            | 1.30528       | 453.026        | 2082.43   | 1        | -48.4632               | -2.40428               | 3.18858                | -4.86672               | 7.66001                | -1.07238               | 13.7569                | -11.8657               |
| IL1A     | 0.91225           | -18.9937            | 18.9937              | 1 up vs 2            | 0.0132089     | 27.5684        | 12522.6   | 1        | -2.21417               | -3.87478               | 2.34406                | -6.61663               | -2.09725               | -79.8413               | 4.25204                | 78.0789                |
| IL1B     | 0.10378           | -2.8199             | 2.8199               | 1 up vs 2            | 3.67266       | 1373.25        | 2243.47   | 1        | -50.4809               | 2.34248                | 23.4873                | -6.76909               | -2.68454               | -12.4514               | 2.79767                | 19.2475                |
| IL23R    | 0.257361          | 47.3732             | 47.3732              | 1 up vs 2            | 1.56605       | 66.2877        | 253.968   | 1        | 8.96439                | -3.51874               | -3.15493               | -3.75041               | 13.0083                | 1.19711                | -2.35464               | 8.47229                |
| IL31RA   | 0.228054          | -2.48361            | 2.48361              | 1 up vs 2            | 1.80179       | 63.8547        | 212.638   | 1        | 6.36817                | -12.2925               | 4.39532                | 3.62729                | 2.48616                | 1.33992                | -5.64402               | 3.82528                |
| IL9      | 0.849947          | 1.54819             | 1.54819              | 1 up vs 2            | 0.0390116     | 41.4693        | 6378      | 1        | -30.0241               | -2.65128               | 6.89171                | -2.22455               | -7.59685               | -3.62375               | 29.707                 | -73.2185               |
| IMPAD1   | 0.00976832        | -1.49469            | 1.49469              | 1 up vs 2            | 13.8924       | 190.432        | 82.2458   | 1        | -8.56604               | 9.18059                | 2.0538                 | -4.64488               | -4.90351               | -1.07658               | 7.68075                | 2.36015                |
| INPP4A   | 0.198828          | -37.3139            | 37.3139              | 1 up vs 2            | 2.0854        | 565241         | 1.63E+06  | 1        | -1575.21               | 27.2733                | 2.88603                | -2.18699               | -7.09487               | 1.65067                | 49.3693                | -9.527                 |
| IP6K1    | 0.0541641         | -1.99672            | 1.99672              | 1 up vs 2            | 5.70317       | 53.4144        | 56.1945   | 1        | -4.97625               | 6.47772                | 3.35255                | -3.24588               | -2.44681               | -1.42737               | 2.83464                | -2.33217               |
| ISCA1    | 0.0248604         | -1.99731            | 1.99731              | 1 up vs 2            | 8.83879       | 257.181        | 174.581   | 1        | -10.8307               | 3.76843                | 4.33133                | -2.41325               | -10.1689               | 1.3129                 | 12.8458                | -2.72148               |
| ISLR     | 0.0025875         | -1.01397            | 1.01397              | 1 up vs 2            | 24.466        | 2919.08        | 715.872   | 1        | -17.5908               | 2.88418                | 15.319                 | -9.79052               | -32.2146               | 27.2093                | 23.8235                | 28.7218                |
| ITGA8    | 0.0210421         | -7.68879            | 7.68879              | 1 up vs 2            | 9.62714       | 263.323        | 164.113   | 1        | -17.3281               | 3.86676                | 2.25859                | -7.98649               | -6.14578               | 1.51468                | -6.68842               | 5.68792                |
| JAK2     | 0.0441962         | -1.68931            | 1.68931              | 1 up vs 2            | 6.44176       | 191.983        | 178.817   | 1        | -6.86919               | 8.70678                | 2.25591                | -3.4663                | -8.73319               | -1.29767               | 12.021                 | -2.87292               |
| JAKMIP1  | 0.00706705        | -4.68804            | 4.68804              | 1 up vs 2            | 16.0515       | 4964.54        | 1855.73   | 1        | -49.5163               | 2.04261                | 8.58088                | -65.0312               | -12.6823               | 5.22939                | 2.81003                | 26.5691                |
| JUP      | 0.23192           | -10.7708            | 10.7708              | 1 up vs 2            | 1.76822       | 100.26         | 340.207   | 1        | -5.29625               | 4.11136                | 3.50096                | -8.44992               | -10.4364               | -16.8593               | 3.46727                | 2.03773                |
| KALRN    | 0.117852          | -1.39298            | 1.39298              | 1 up vs 2            | 3.32949       | 157.931        | 284.605   | 1        | -4.14426               | 17.9958                | 2.98654                | -3.71743               | -8.16561               | -1.77447               | 2.24104                | -2.27263               |
| KAZALD1  | 0.143991          | -1.07807            | 1.07807              | 1 up vs 2            | 2.82185       | 3323.84        | 7067.36   | 1        | -44.5601               | 5.12888                | -2.0465                | -15.8007               | -5.16719               | -1.0254                | 8.80325                | 90.4444                |
| KBTBD9   | 0.0888691         | -1.8708             | 1.8708               | 1 up vs 2            | 4.11412       | 611.12         | 891.252   | 1        | -19.2885               | 3.58808                | 2.19061                | -5.48026               | -10.5258               | 2.72823                | 30.2192                | -7.28266               |
| KCNA1    | 0.184775          | -11.5534            | 11.5534              | 1 up vs 2            | 2.24411       | 4893.16        | 13082.7   | 1        | -130.863               | 4.26401                | -2.25471               | -2.69327               | -7.49081               | -4.29696               | 45.3065                | -22.6718               |
| KCNIP4   | 0.206414          | -171.909            | 171.909              | 1 up vs 2            | 2.00626       | 38024.2        | 113717    | 1        | -415.444               | 8.46649                | -6.34869               | -7.24694               | -2.05714               | 4.37716                | 21.9701                | -24.3471               |

| Gene ID              | p-value (1 vs. 2) | MeanRatio (1 vs. 2) | FoldChange (1 vs. 2) | FoldChange (1 vs. 2) | F(Gene Group) | SS(Gene Group) | SS(Error) | F(Error) | FoldChange (106 vs. n) | FoldChange (111 vs. n) | FoldChange (112 vs. n) | FoldChange (121 vs. n) | FoldChange (347 vs. n) | FoldChange (353 vs. n) | FoldChange (537 vs. n) | FoldChange (563 vs. n) |
|----------------------|-------------------|---------------------|----------------------|----------------------|---------------|----------------|-----------|----------|------------------------|------------------------|------------------------|------------------------|------------------------|------------------------|------------------------|------------------------|
| KCNJ15               | 0.67986           | 6.26611             | 6.26611              | 1 up vs 2            | 0.187851      | 9.16316        | 292.674   | 1        | -2.05501               | 2.22496                | -2.39895               | 11.9538                | -2.00744               | 8.35664                | 2.62038                | -8.70408               |
| KCNJ4                | 0.230217          | 3.72116             | 3.72116              | 1 up vs 2            | 1.78291       | 2559.67        | 8614.03   | 1        | -89.3082               | -2.45789               | 3.33707                | -14.7965               | -47.4735               | 7.25107                | 5.50162                | -81.5221               |
| KCNK10               | 0.102609          | -11.0228            | 11.0228              | 1 up vs 2            | 3.7041        | 1679.24        | 2720.07   | 1        | -8.31976               | 10.3272                | -2.88435               | -5.95113               | -68.0411               | -3.13238               | 11.7284                | -3.59313               |
| KCNQ3                | 0.017061          | -1.56612            | 1.56612              | 1 up vs 2            | 10.6847       | 815.837        | 458.134   | 1        | -12.0786               | 9.45412                | 16.1255                | -2.22167               | -23.8916               | 16.1255                | -2.09511               |                        |
| KCNS1                | 0.197966          | 2.8655              | 2.8655               | 1 up vs 2            | 2.09467       | 3501.14        | 10028.7   | 1        | -129.117               | -64.6687               | -4.21571               | -15.7699               | -54.24                 | -6.55361               | 2.26777                | -42.6482               |
| KIAA0101             | 0.0838669         | -1.3173             | 1.3173               | 1 up vs 2            | 4.28563       | 728.341        | 1019.7    | 1        | -34.2411               | 10.3643                | 2.75941                | 5.1991                 | -4.56972               | 19.0137                | 7.07714                | 3.31141                |
| KIAA0284             | 0.0788589         | -5.29824            | 5.29824              | 1 up vs 2            | 4.47195       | 174.803        | 234.532   | 1        | -12.1218               | -4.5261                | 12.3445                | -5.03254               | -7.21295               | -3.4498                | 5.50229                | -2.20568               |
| KIAA0514             | 0.770233          | 5.80141             | 5.80141              | 1 up vs 2            | 0.0933926     | 38.4157        | 2468.02   | 1        | 23.2059                | 6.09399                | -24.1656               | -33.9734               | -5.63991               | 3.18202                | 13.8819                | -3.70594               |
| KIAA0692             | 0.287223          | -8.56086            | 8.56086              | 1 up vs 2            | 1.36354       | 85.0233        | 374.129   | 1        | -11.4252               | -2.34394               | 4.97971                | 2.95097                | -9.61458               | -3.99191               | 12.3351                | -7.45735               |
| KIAA0748             | 0.131949          | 68.4351             | 68.4351              | 1 up vs 2            | 3.03829       | 1.22E+06       | 2.41E+06  | 1        | -310.544               | -21.7485               | -3.10181               | -2078.1                | -67.3267               | -1.35952               | -3.14848               | -30.4543               |
| KIAA1199             | 0.0428678         | -1.32636            | 1.32636              | 1 up vs 2            | 6.55723       | 767.364        | 702.154   | 1        | -9.91628               | 28.2192                | 6.70264                | -2.22465               | -22.4614               | 1.45934                | 4.77354                | 2.32568                |
| KIAA1239             | 0.0851903         | 6.8927              | 6.8927               | 1 up vs 2            | 4.23892       | 43614.6        | 61734.5   | 1        | -209.967               | -2.09925               | 68.6193                | -258.08                | -67.1474               | -7.41081               | 12.5658                | -201.086               |
| KIAA1345             | 0.879656          | 1.48277             | 1.48277              | 1 up vs 2            | 0.0249576     | 13.5482        | 3257.1    | 1        | -30.6866               | 5.27488                | 2.165                  | -2.00086               | 7.91926                | 11.4235                | 2.67333                | -49.3767               |
| KIAA1543             | 0.0863577         | -2.18452            | 2.18452              | 1 up vs 2            | 4.19853       | 535.363        | 765.072   | 1        | -28.2753               | 2.62374                | -2.524                 | 2.0135                 | -8.51239               | 13.6362                | 15.1114                | -2.31662               |
| KILLIN               | 0.248879          | -1.21239            | 1.21239              | 1 up vs 2            | 1.63006       | 346.806        | 1276.54   | 1        | -9.3467                | 32.4326                | 2.0558                 | -18.1816               | 5.1697                 | 2.22739                | 4.37635                | -10.3559               |
| KL                   | 0.0227249         | -8.61136            | 8.61136              | 1 up vs 2            | 9.25781       | 6138.19        | 3978.17   | 1        | -90.1828               | -5.33896               | 29.8004                | -35.3934               | -10.2136               | -2.04335               | 2.39209                | 4.95473                |
| KLHL29               | 0.116522          | -1.21667            | 1.21667              | 1 up vs 2            | 3.35945       | 833.883        | 1489.32   | 1        | -17.9329               | 2.62436                | 2.31386                | -4.86931               | -11.923                | 4.80743                | 42.4245                | -4.6015                |
| KLKP1                | 0.759758          | 1.71736             | 1.71736              | 1 up vs 2            | 0.102454      | 5.74426        | 336.401   | 1        | 18.2018                | -2.39097               | 6.4723                 | -2.27381               | -3.35723               | 3.69772                | 2.06167                | 2.35897                |
| KRT16                | 0.310795          | 4.67634             | 4.67634              | 1 up vs 2            | 1.22487       | 491.791        | 2409.04   | 1        | -2.58638               | -2.65405               | 12.4419                | 59.131                 | 5.25725                | 1.13484                | 2.11353                | 8.99024                |
| KRT17                | 0.207953          | 696.151             | 696.151              | 1 up vs 2            | 1.99071       | 4.71E+06       | 1.42E+07  | 1        | -4663.7                | -5.15156               | -4.32198               | -89.8223               | 4.99911                | 2.02162                | -8.94832               |                        |
| KRT222               | 0.332952          | 4.41545             | 4.41545              | 1 up vs 2            | 1.10849       | 87974          | 476183    | 1        | -806.007               | -23.0973               | -2.19135               | -10.4849               | -23.5965               | -282.745               | 14.2462                | -23.3146               |
| KRT26                | 0.0922881         | -1.00912            | 1.00912              | 1 up vs 2            | 4.00432       | 135.341        | 202.793   | 1        | -2.54186               | 14.041                 | -4.80496               | -3.37629               | -6.88368               | 1.05512                | 4.6052                 | 6.24723                |
| KRTAP10-9            | 0.0247688         | -4.8109             | 4.8109               | 1 up vs 2            | 8.85576       | 405.258        | 274.572   | 1        | -10.8423               | -2.57957               | -4.57934               | -5.16692               | -20.5056               | 2.76774                | 10.2239                | 6.81731                |
| LACTB                | 0.0317831         | -4.5553             | 4.5553               | 1 up vs 2            | 7.75668       | 315.6          | 244.125   | 1        | -22.8343               | 3.90842                | 4.17168                | -3.78339               | -5.29759               | -1.37576               | 2.80654                | 2.1661                 |
| LACTB                | 0.00579312        | -1.30567            | 1.30567              | 1 up vs 2            | 17.4988       | 97.8214        | 33.5411   | 1        | -5.44238               | 2.85148                | 4.61429                | -2.82031               | -4.00814               | -1.39419               | 5.74293                | 3.849                  |
| LCN1                 | 0.12028           | -1.12375            | 1.12375              | 1 up vs 2            | 3.27598       | 691.507        | 1266.5    | 1        | -2.69888               | -2.27562               | 34.075                 | -3.91938               | -23.8667               | 1.19908                | 14.7831                | -2.56854               |
| LCN15                | 0.109402          | 6.8493              | 6.8493               | 1 up vs 2            | 3.52826       | 1529.47        | 2600.94   | 1        | -72.3456               | -9.43681               | 5.0713                 | -8.43325               | -19.5516               | -13.2462               | 2.71891                | -9.52099               |
| LETMD1               | 0.084452          | -6.40943            | 6.40943              | 1 up vs 2            | 4.26486       | 161.916        | 227.791   | 1        | -18.7729               | 2.35324                | 2.08438                | -3.05568               | -2.28711               | 1.19431                | 5.36964                | -4.73068               |
| LFNG                 | 0.857255          | 1.73429             | 1.73429              | 1 up vs 2            | 0.0352531     | 2.30798        | 392.812   | 1        | -2.54385               | 2.65231                | 2.12392                | -2.61515               | -2.70222               | 3.64784                | 3.22894                | -19.2077               |
| LGR5                 | 0.373613          | -1.71899            | 1.71899              | 1 up vs 2            | 0.923729      | 318.661        | 2069.83   | 1        | -2.16391               | 15.2687                | -4.6379                | 29.6412                | -2.75149               | -34.9771               | 3.31688                | -2.9438                |
| LHFPL2               | 0.00115808        | -2.72912            | 2.72912              | 1 up vs 2            | 33.5657       | 122.746        | 21.9414   | 1        | -6.46813               | 2.89421                | 2.78901                | -6.70251               | -4.59337               | -1.5988                | 2.60124                | 4.16278                |
| LHX1                 | 0.258262          | -75.2196            | 75.2196              | 1 up vs 2            | 1.55943       | 440997         | 1.70E+06  | 1        | -1540.4                | 28.6003                | 2.28322                | 102.386                | 2.18554                | 1.42166                | 2.41014                | -2.90117               |
| LHX2                 | 0.0619536         | 18.2881             | 18.2881              | 1 up vs 2            | 5.24359       | 467358         | 534777    | 1        | -1066.1                | 4.16915                | 4.01106                | -463.348               | -54.9592               | -11.327                | 4.57847                | -145.825               |
| LHX6                 | 0.288719          | -9.5003             | 9.5003               | 1 up vs 2            | 1.35423       | 423.539        | 1876.51   | 1        | 38.7028                | 15.9132                | -12.5812               | -2.18102               | 4.27286                | -2.99693               | 11.6165                | -19.1083               |
| LILRB2               | 0.869714          | 1.25926             | 1.25926              | 1 up vs 2            | 0.0293003     | 1.39207        | 285.063   | 1        | 17.134                 | 2.9377                 | 4.65608                | -2.3187                | -2.25997               | -1.43027               | 4.2831                 | 6.1707                 |
| LINS1                | 0.000870761       | -1.15636            | 1.15636              | 1 up vs 2            | 37.4277       | 69.72          | 11.1767   | 1        | -3.50326               | 5.40856                | 2.50378                | -2.1336                | -4.17318               | 1.47938                | 2.47222                | 2.27534                |
| LMO3                 | 0.104555          | 33.7093             | 33.7093              | 1 up vs 2            | 3.65214       | 8954.26        | 14710.7   | 1        | -51.0876               | -4.86432               | 4.3043                 | -8.26879               | -154.299               | 12.6596                | 27.4206                | -50.0838               |
| LNX1                 | 0.160692          | -4.90933            | 4.90933              | 1 up vs 2            | 2.56035       | 95216.1        | 223132    | 1        | -543.544               | 12.1635                | 4.34103                | -4.73609               | -13.3623               | 7.16061                | 196.962                | -29.9553               |
| LOC100128010.104538  | -5.34027          | 5.34027             |                      | 1 up vs 2            | 3.65258       | 910.647        | 1495.9    | 1        | 4.75944                | 7.88912                | -14.823                | -35.5948               | -24.8513               | 2.19223                | 19.7585                | 2.36262                |
| LOC100128050.0234874 | -27.2762          | 27.2762             |                      | 1 up vs 2            | 9.10234       | 120.728        | 79.5802   | 1        | -3.37158               | 2.11732                | -4.58679               | -7.78413               | -12.0656               | -1.44377               | 2.2389                 | 3.09324                |
| LOC100128270.0278868 | -2.51913          | 2.51913             |                      | 1 up vs 2            | 8.32136       | 138.351        | 99.7558   | 1        | -2.40705               | 2.06758                | 3.95656                | -2.66249               | -13.3775               | -1.21121               | 4.79639                | 2.59531                |
| LOC100128360.495525  | -4.38745          | 4.38745             |                      | 1 up vs 2            | 0.526177      | 95.4072        | 1087.93   | 1        | -17.1334               | 2.90295                | 2.28355                | 18.5829                | -18.8772               | 6.17046                | -10.7282               | 5.99152                |
| LOC100128400.218872  | 26.3684           | 26.3684             |                      | 1 up vs 2            | 1.88497       | 105911         | 337123    | 1        | -715.807               | -6.8884                | -2.65732               | -4.52102               | -20.78                 | -3.48611               | 44.0059                | -76.0172               |
| LOC100128410.0853303 | 1.61704           | 1.61704             |                      | 1 up vs 2            | 4.23404       | 1859.75        | 2635.43   | 1        | -52.3002               | 16.6842                | 37.16                  | -2.652                 | -3.42715               | -4.09363               | 7.57899                |                        |
| LOC100128530.996397  | 1.03287           | 1.03287             |                      | 1 up vs 2            | 2.22E-05      | 0.0007769      | 210.394   | 1        | 3.20122                | -12.8371               | 3.42452                | -2.68548               | -2.4346                | 1.73798                | 2.03186                | 2.54642                |
| LOC100128760.209967  | 205.558           | 205.558             |                      | 1 up vs 2            | 1.97061       | 3025.42        | 9211.63   | 1        | -115.123               | 2.43549                | 8.29395                | -2.32199               | -3.65153               | -1.04589               | 13.3116                | -23.977                |
| LOC100128890.0750952 | 10.0226           | 10.0226             |                      | 1 up vs 2            | 4.62296       | 4998.81        | 6487.8    | 1        | -2.11962               | 16.0038                | 4.45606                | 109.122                | 65.0666                | 2.48858                | 9.02967                | -3.36453               |
| LOC100129070.458546  | -1.42045          | 1.42045             |                      | 1 up vs 2            | 0.627187      | 688.397        | 6585.57   | 1        | -17.3439               | 2.75828                | 5.86141                | -2.63229               | -13.758                | -36.4813               | 73.3074                | -5.8643                |
| LOC100129160.734484  | 1.86123           | 1.86123             |                      | 1 up vs 2            | 0.126276      | 96.6898        | 4594.22   | 1        | -2.03641               | 2.23912                | -4.765                 | 53.0934                | -4.49914               | 1.20529                | 52.0584                | -9.04679               |
| LOC100129190.233065  | 1358.74           | 1358.74             |                      | 1 up vs 2            | 1.75843       | 138664         | 473139    | 1        | -833.625               | 5.54681                | 4.01377                | 14.7191                | 2.47107                | 2.32741                | -10.8399               | -2.04955               |
| LOC100129300.18904   | 6.03361           | 6.03361             |                      | 1 up vs 2            | 2.19416       | 196.505        | 537.35    | 1        | 2.58828                | 6.75528                | -2.59051               | 30.3882                | 3.83689                | 1.4464                 | 2.48663                | 2.07117                |
| LOC100129360.0527085 | -16.2258          | 16.2258             |                      | 1 up vs 2            | 5.79905       | 57.8223        | 59.8259   | 1        | -4.11866               | 2.129                  | 2.05553                | -2.30995               | -9.26399               | -3.47805               | 3.00674                | -2.10132               |

| Gene ID               | p-value (1 vs. 2) | MeanRatio (1 vs. 2) | FoldChange (1 vs. 2) | FoldChange (1 vs. 2) | F(Gene Group) | SS(Gene Group) | SS(Error) | F(Error) | FoldChange (106 vs. n) | FoldChange (111 vs. n) | FoldChange (112 vs. n) | FoldChange (121 vs. n) | FoldChange (347 vs. n) | FoldChange (353 vs. n) | FoldChange (537 vs. n) | FoldChange (563 vs. n) |
|-----------------------|-------------------|---------------------|----------------------|----------------------|---------------|----------------|-----------|----------|------------------------|------------------------|------------------------|------------------------|------------------------|------------------------|------------------------|------------------------|
| LOC100129430.14384    | -1.05184          | 1.05184             | 1 up vs 2            | 2.82441              | 88.9991       | 189.064        | 1         | -5.07483 | 3.14101                | 4.83719                | -3.29411               | -2.22651               | -1.47454               | 13.888                 | -3.60288               |                        |
| LOC100129510.594697   | 43.5987           | 43.5987             | 1 up vs 2            | 0.315449             | 324.43        | 6170.82        | 1         | -29.5059 | 8.88531                | -2.12437               | -3.78834               | -7.09431               | -58.4365               | 47.703                 | 2.42861                |                        |
| LOC100129690.0531931  | -12.905           | 12.905              | 1 up vs 2            | 5.76674              | 3602.03       | 3747.73        | 1         | -34.0872 | 9.07037                | 2.17022                | -2.49971               | -85.4472               | -2.63944               | 12.8676                | -5.70821               |                        |
| LOC100129650.011591   | -12.0357          | 12.0357             | 1 up vs 2            | 12.8431              | 589.673       | 275.482        | 1         | -22.7404 | 2.24035                | 3.13577                | -4.04535               | -22.3348               | 1.03104                | 4.70768                | -4.31279               |                        |
| LOC100129750.896028   | 2.22211           | 2.22211             | 1 up vs 2            | 0.018583             | 7.53621       | 2433.26        | 1         | -2.44467 | -39.879                | 28.8112                | -5.95915               | -2.53204               | -2.26147               | 2.588                  | 2.53895                |                        |
| LOC100130150.111436   | -5.23885          | 5.23885             | 1 up vs 2            | 3.47854              | 2636.46       | 4547.53        | 1         | -5.87411 | 9.05946                | 5.92707                | -2.22324               | -86.3659               | 2.3371                 | 5.91547                | 6.81303                |                        |
| LOC100130150.635074   | 2.29298           | 2.29298             | 1 up vs 2            | 0.249708             | 68.54         | 1646.88        | 1         | -19.3569 | 2.07913                | -38.053                | -2.95213               | -9.85729               | 5.39848                | 11.1192                | -3.92411               |                        |
| LOC100130220.722841   | -3.33312          | 3.33312             | 1 up vs 2            | 0.138212             | 3.17732       | 137.933        | 1         | 4.75492  | -2.93117               | -2.74793               | 4.11237                | -5.86328               | 3.18523                | 5.00769                | -4.01592               |                        |
| LOC100130230.251418   | 37.345            | 37.345              | 1 up vs 2            | 1.61057              | 143352        | 534043         | 1         | 10.3028  | 5.35988                | 2.54566                | 880.073                | -38.0398               | 5.27157                | 16.7873                | 8.07437                |                        |
| LOC100130240.542613   | 10.1613           | 10.1613             | 1 up vs 2            | 0.416398             | 65.5133       | 944            | 1         | -2.28287 | 10.0674                | -4.02764               | -2.59021               | -14.7957               | 6.33099                | 9.00806                | -24.6049               |                        |
| LOC100130280.985988   | 1.20607           | 1.20607             | 1 up vs 2            | 0.00033511           | 0.0799966     | 1432.33        | 1         | -2.56506 | 16.2287                | -33.0119               | 2.91748                | -3.97914               | 1.88152                | 6.55866                | 3.33126                |                        |
| LOC100130520.216186   | -168.656          | 168.656             | 1 up vs 2            | 1.91027              | 1.98E+06      | 6.21E+06       | 1         | -3054.67 | 25.7424                | 3.86789                | -3.04236               | -3.98983               | -3.87095               | 7.27912                | -2.76251               |                        |
| LOC100130690.418195   | 2.96597           | 2.96597             | 1 up vs 2            | 0.755341             | 199.875       | 1587.69        | 1         | 3.47088  | 12.1268                | 6.71774                | 45.6311                | -2.37263               | -1.92886               | 12.2229                | -2.87997               |                        |
| LOC100131040.203349   | -28.4927          | 28.4927             | 1 up vs 2            | 2.03772              | 1590.77       | 4683.96        | 1         | -2.72925 | 2.24312                | -4.38157               | 2.04418                | -83.7345               | 1.86048                | 2.59843                | 2.61763                |                        |
| LOC100131330.159755   | -1.79383          | 1.79383             | 1 up vs 2            | 2.574                | 44.6856       | 104.162        | 1         | 4.5041   | 2.80874                | 2.73412                | -5.59051               | -8.317                 | -1.43941               | 2.41609                | 2.21728                |                        |
| LOC100131660.487392   | 2.3391            | 2.3391              | 1 up vs 2            | 0.547187             | 6165.14       | 67601.9        | 1         | -6.09669 | -3.09517               | -3.89673               | -3.48034               | -290.912               | -76.2752               | -127.817               | -3.02221               |                        |
| LOC100132180.218313   | -339.977          | 339.977             | 1 up vs 2            | 1.8902               | 1.32E+07      | 4.19E+07       | 1         | -7929.45 | 6.81383                | 21.8043                | -3.14917               | -2.67923               | 4.31955                | 8.25259                | -2.28925               |                        |
| LOC100132240.264761   | 21.6407           | 21.6407             | 1 up vs 2            | 1.5127               | 124.235       | 492.766        | 1         | 4.27571  | 3.70196                | -2.82453               | 23.8718                | -2.54461               | -1.47                  | 8.00139                | -5.437                 |                        |
| LOC100132250.183324   | -84.1664          | 84.1664             | 1 up vs 2            | 2.26147              | 52646.8       | 139679         | 1         | -7.07745 | 3.1905                 | 3.01695                | -19.1145               | -470.603               | -1.86049               | 7.57712                | -2.08653               |                        |
| LOC100132330.319408   | 3.76951           | 3.76951             | 1 up vs 2            | 1.17814              | 141.028       | 718.224        | 1         | -2.78889 | 16.0103                | 3.14568                | -15.2904               | -2.48362               | 1.4265                 | 6.37239                | -17.8631               |                        |
| LOC100132450.424936   | -3.58363          | 3.58363             | 1 up vs 2            | 0.732473             | 514.256       | 4212.5         | 1         | -62.4937 | 9.45734                | 3.17601                | -3.27352               | 26.9232                | 2.31994                | 5.42459                | -2.3124                |                        |
| LOC100132710.00967023 | -1.3673           | 1.3673              | 1 up vs 2            | 13.9562              | 106.863       | 45.9421        | 1         | -6.85761 | 7.22577                | 2.64628                | -2.25828               | -3.96521               | -1.05592               | 3.91057                | 3.21851                |                        |
| LOC100132810.232862   | -35.0098          | 35.0098             | 1 up vs 2            | 1.76016              | 120417        | 410476         | 1         | -767.625 | 2.20281                | 3.52014                | 30.8645                | -2.39139               | -21.9518               | 45.8522                | 5.56449                |                        |
| LOC100132840.667629   | 2.9855            | 2.9855              | 1 up vs 2            | 0.203668             | 13.0981       | 385.866        | 1         | 4.13278  | -4.50688               | -9.43597               | 2.20157                | 5.58826                | -1.49092               | 6.95791                | 15.1317                |                        |
| LOC100132970.473928   | 3.61744           | 3.61744             | 1 up vs 2            | 0.583427             | 117.209       | 1205.38        | 1         | -2.54858 | -18.3188               | 3.22784                | 4.44375                | -34.6764               | 1.39521                | 3.26979                | -4.67737               |                        |
| LOC100133050.640421   | 7.21882           | 7.21882             | 1 up vs 2            | 0.241738             | 8.56864       | 212.676        | 1         | 2.24309  | -4.21879               | 4.53195                | 2.60775                | 2.59365                | -1.84739               | 10.7408                | -7.4878                |                        |
| LOC100133080.667939   | -1.3101           | 1.3101              | 1 up vs 2            | 0.203257             | 26.4271       | 780.107        | 1         | -4.34852 | 13.9095                | 2.79358                | -2.31746               | 13.0533                | -19.9717               | -2.81578               | -2.04134               |                        |
| LOC100133320.0368255  | -1.00307          | 1.00307             | 1 up vs 2            | 7.15072              | 166.603       | 139.792        | 1         | -8.18907 | 11.3538                | 4.75382                | 2.48049                | -8.45249               | -1.11768               | 2.9537                 | 3.3506                 |                        |
| LOC100133350.0639771  | -5.03884          | 5.03884             | 1 up vs 2            | 5.13688              | 49.8031       | 58.1712        | 1         | -8.15364 | 3.08304                | 3.58251                | -2.56991               | -2.17753               | -2.42623               | 2.38438                | -2.35649               |                        |
| LOC100133570.0913992  | -6.27072          | 6.27072             | 1 up vs 2            | 4.03233              | 88.0953       | 131.084        | 1         | -3.51706 | 3.67981                | 2.86948                | -11.4122               | -2.80598               | -3.57542               | 6.05744                | -4.31754               |                        |
| LOC100133840.185521   | -140.157          | 140.157             | 1 up vs 2            | 2.23525              | 2956.66       | 7936.46        | 1         | -2.69883 | 4.01483                | -5.17623               | -111.847               | -3.74036               | 1.68168                | -2.98965               | 3.87596                |                        |
| LOC100133890.899712   | -1.3238           | 1.3238              | 1 up vs 2            | 0.0172807            | 1.32207       | 459.031        | 1         | -3.48078 | -6.94564               | -7.01592               | 2.34808                | 2.56776                | 2.85327                | 16.6358                | -7.33426               |                        |
| LOC100133920.218224   | 714.159           | 714.159             | 1 up vs 2            | 1.89103              | 5.31E+07      | 1.69E+08       | 1         | -2.15048 | 12.4289                | 4.3036                 | 15931.3                | 62.3872                | -14.7378               | 32.3502                | 2.97532                |                        |
| LOC100134050.0171017  | -1.90172          | 1.90172             | 1 up vs 2            | 10.6722              | 416.733       | 234.29         | 1         | -5.3737  | 12.746                 | 2.98612                | -19.0866               | -4.85137               | -1.07122               | 6.65869                | 4.36916                |                        |
| LOC100134090.18445    | 5.18992           | 5.18992             | 1 up vs 2            | 2.24798              | 36.6244       | 97.7526        | 1         | -11.666  | -4.51587               | -2.83627               | -2.05088               | -2.70643               | -2.5447                | 2.31005                | 2.31268                |                        |
| LOC100134180.0352194  | -3.57069          | 3.57069             | 1 up vs 2            | 7.33097              | 367.546       | 300.817        | 1         | -13.7413 | 14.9247                | 2.16509                | -14.6009               | -4.47089               | -3.59863               | 5.52672                | -3.70195               |                        |
| LOC100134400.228813   | -2.48088          | 2.48088             | 1 up vs 2            | 1.79514              | 853.447       | 2852.53        | 1         | 2.10118  | 17.91                  | -6.09706               | -53.4487               | 5.73062                | 21.0729                | 3.09021                | -5.33046               |                        |
| LOC100134450.201097   | -2.56539          | 2.56539             | 1 up vs 2            | 2.06128              | 48.7673       | 141.952        | 1         | 2.282    | 6.6396                 | 4.50468                | -3.69597               | -9.59461               | 1.45296                | -3.13596               | -2.30929               |                        |
| LOC100134560.294673   | 15.8408           | 15.8408             | 1 up vs 2            | 1.31789              | 310.964       | 1415.73        | 1         | 6.13423  | 2.13265                | -2.47355               | -43.637                | -3.735                 | 1.73066                | -2.35875               | -3.36977               |                        |
| LOC100134640.019504   | -2.66408          | 2.66408             | 1 up vs 2            | 10.0012              | 173.019       | 103.799        | 1         | -10.8759 | 3.15173                | 3.15274                | -2.54997               | -7.52729               | -3.41483               | 8.21716                | 2.00162                |                        |
| LOC100134740.937504   | 1.12081           | 1.12081             | 1 up vs 2            | 0.00668315           | 1.48367       | 1332.01        | 1         | -2.63758 | -2.76223               | -3.99517               | 12.6066                | 14.7887                | 1.46635                | 37.0312                | 5.07499                |                        |
| LOC100134760.205151   | -4.48378          | 4.48378             | 1 up vs 2            | 2.01914              | 971.442       | 2886.7         | 1         | -3.63138 | -6.74077               | -2.21295               | -2.38142               | 61.8461                | -4.79486               | 2.42611                | -9.43132               |                        |
| LOC120364             | 0.742227          | 4.58817             | 1 up vs 2            | 0.118677             | 5.183         | 262.039        | 1         | 8.08951  | 2.88433                | -2.10339               | 2.463                  | -4.17461               | 7.00918                | 4.70937                | -10.1827               |                        |
| LOC138864             | 0.126979          | 23.5026             | 1 up vs 2            | 3.13581              | 134.435       | 257.225        | 1         | -3.26533 | -2.13389               | 2.24488                | -21.1979               | -2.06813               | -2.03338               | -2.67687               | 2.71781                |                        |
| LOC143188             | 0.397875          | 22.2838             | 1 up vs 2            | 0.828209             | 9.43403       | 68.3453        | 1         | -5.37564 | -2.90872               | -2.06326               | -4.35892               | 2.6891                 | -1.06379               | 2.12387                | 3.38495                |                        |
| LOC144481             | 0.756567          | 1.85846             | 1 up vs 2            | 0.105307             | 55.9636       | 3188.6         | 1         | -3.88745 | 4.20684                | -53.347                | -28.6861               | -2.90822               | 6.40228                | 5.23388                | 5.68403                |                        |
| LOC157627             | 0.200034          | 985.35              | 1 up vs 2            | 2.07253              | 101845        | 294842         | 1         | -676.111 | -3.36745               | 3.21303                | -3.09094               | -20.6902               | 3.27289                | 13.9722                | -18.2745               |                        |
| LOC220115             | 0.693508          | 3.66693             | 1 up vs 2            | 0.171107             | 9.02518       | 16.474         | 1         | -2.62209 | 7.92331                | -12.435                | 2.00016                | -4.54961               | 6.26259                | 4.6651                 | -4.06547               |                        |
| LOC284757             | 0.68452           | 2.35248             | 1 up vs 2            | 0.182029             | 35.8711       | 1182.38        | 1         | -2.2208  | -31.1616               | 7.58641                | -17.5541               | -3.04891               | -2.3853                | 6.26009                | 3.53037                |                        |
| LOC285697             | 0.383054          | 51.4588             | 1 up vs 2            | 0.885381             | 209.425       | 1419.22        | 1         | 40.0949  | -6.0504                | -3.05092               | -3.04046               | -4.7206                | -2.14182               | 7.32191                | 4.96847                |                        |
| LOC286094             | 0.201139          | -72.0384            | 1 up vs 2            | 2.06084              | 356.487       | 1037.89        | 1         | 3.24785  | 3.60401                | -10.4519               | -9.26429               | -34.7831               | -1.10381               | 12.3116                | -3.41597               |                        |
| LOC389300             | 0.103872          | 26.4431             | 1 up vs 2            | 3.67021              | 201.477       | 329.372        | 1         | 2.02105  | 2.31776                | 2.78141                | 5.9474                 | 24.3519                | -2.22353               | -4.12926               | 3.29072                |                        |

| Gene ID   | p-value (1 vs. 2) | MeanRatio (1 vs. 2) | FoldChange (1 vs. 2) | FoldChange (1 vs. 2) | F(Gene Group) | SS(Gene Group) | SS(Error) | F(Error) | FoldChange (106 vs. n) | FoldChange (111 vs. n) | FoldChange (112 vs. n) | FoldChange (121 vs. n) | FoldChange (347 vs. n) | FoldChange (353 vs. n) | FoldChange (537 vs. n) | FoldChange (563 vs. n) |
|-----------|-------------------|---------------------|----------------------|----------------------|---------------|----------------|-----------|----------|------------------------|------------------------|------------------------|------------------------|------------------------|------------------------|------------------------|------------------------|
| LOC389405 | 0.0626407         | -12.85              | 12.85                | 1 up vs 2            | 5.20683       | 32005.5        | 36881     | 1        | -253.54                | -11.4089               | 40.3442                | 11.118                 | -121.23                | -2.64422               | 23.1118                | -2.23647               |
| LOC389517 | 0.08197           | -6.03462            | 6.03462              | 1 up vs 2            | 4.35437       | 921.909        | 1270.32   | 1        | -9.41962               | -3.95786               | 2.38771                | -45.3815               | -2.26441               | -3.16623               | 7.93539                | 12.5616                |
| LOC389827 | 0.277086          | -76.9644            | 76.9644              | 1 up vs 2            | 1.42861       | 4791.83        | 20125.1   | 1        | 163.678                | -2.44763               | -14.8508               | -2.24132               | -11.7219               | -1.55887               | -4.74018               | 20.3554                |
| LOC390714 | 0.238915          | 36.5909             | 36.5909              | 1 up vs 2            | 1.7095        | 83873.6        | 294380    | 1        | 660.309                | 6.24576                | 4.14761                | -5.35495               | -2.62419               | 5.8267                 | 16.1416                | -2.64895               |
| LOC400406 | 0.0834716         | -1.14081            | 1.14081              | 1 up vs 2            | 4.29978       | 2558.39        | 3570.02   | 1        | -59.1626               | 2.16601                | 28.7449                | 3.67136                | -3.56136               | 31.8946                | 28.6314                | -5.16407               |
| LOC400836 | 0.178387          | -1.43745            | 1.43745              | 1 up vs 2            | 2.32205       | 159.041        | 410.949   | 1        | -6.51358               | -7.82347               | 7.14456                | -4.37714               | -5.40347               | -1.77883               | 18.9431                | 2.40705                |
| LOC401357 | 0.30299           | -10.7129            | 10.7129              | 1 up vs 2            | 1.26896       | 594.978        | 2813.23   | 1        | -5.74422               | -24.6904               | 4.10287                | 5.42229                | -48.5561               | 1.08998                | 3.39785                | 23.7039                |
| LOC401805 | 0.0852935         | -4.0574             | 4.0574               | 1 up vs 2            | 4.23532       | 1199.76        | 1699.65   | 1        | -49.5196               | 8.83664                | 2.62963                | -7.33523               | -4.02718               | -1.07539               | 20.4441                | -5.82637               |
| LOC402117 | 0.142717          | -15.7897            | 15.7897              | 1 up vs 2            | 2.84354       | 77.6239        | 163.79    | 1        | -12.5534               | -6.0068                | 5.29747                | -3.18943               | -2.4102                | 3.49932                | 3.02913                | -3.90299               |
| LOC439951 | 0.0815479         | 2.60247             | 2.60247              | 1 up vs 2            | 4.36997       | 15.5073        | 21.2917   | 1        | -5.90353               | -2.98731               | -3.2204                | -4.35121               | -3.75676               | -2.7221                | 2.00714                | -2.05053               |
| LOC440092 | 0.0108563         | -2.15782            | 2.15782              | 1 up vs 2            | 13.2376       | 171.982        | 77.952    | 1        | -7.37108               | 8.52518                | 2.3504                 | -3.05893               | -9.20315               | -2.0972                | 2.46807                | 3.91793                |
| LOC440160 | 0.105583          | -1.36512            | 1.36512              | 1 up vs 2            | 3.6252        | 10185.5        | 16857.8   | 1        | -127.912               | 93.7718                | 7.30408                | 2.38717                | -2.09804               | 16.7526                | 40.4688                | -2.48279               |
| LOC440366 | 0.126793          | -2.44661            | 2.44661              | 1 up vs 2            | 3.13957       | 174.376        | 333.248   | 1        | 5.85437                | -16.0682               | 7.13785                | 9.6699                 | 5.01271                | 3.12408                | -2.13095               | -6.05287               |
| LOC440525 | 0.84191           | 2.68102             | 2.68102              | 1 up vs 2            | 0.0433753     | 0.867578       | 120.01    | 1        | 8.62648                | -2.13241               | 2.40231                | -3.22443               | -2.14742               | -3.3814                | 2.57483                | 2.55992                |
| LOC441061 | 0.0968901         | -3.02992            | 3.02992              | 1 up vs 2            | 3.86504       | 3834.95        | 5953.3    | 1        | -7.84686               | 5.09679                | 14.3431                | -2.03071               | -92.1307               | 3.4711                 | 35.3474                | -2.14683               |
| LOC441131 | 0.886385          | 1.27101             | 1.27101              | 1 up vs 2            | 0.022221      | 1.41152        | 381.13    | 1        | 4.54581                | -2.26476               | -5.81594               | 5.30411                | 2.35771                | 2.39273                | 19.4405                | -2.25529               |
| LOC441368 | 0.793974          | 1.39187             | 1.39187              | 1 up vs 2            | 0.074553      | 4.87646        | 392.456   | 1        | 4.81678                | 2.66215                | -3.27651               | 15.6052                | -3.23761               | -1.69705               | 14.2481                | 8.64046                |
| LOC441495 | 0.718873          | 1.92385             | 1.92385              | 1 up vs 2            | 0.142423      | 6.90521        | 290.903   | 1        | 2.91436                | 2.59535                | -2.96239               | -17.1057               | 2.20245                | -2.48795               | -5.24529               | -2.28592               |
| LOC441642 | 0.00422455        | -1.43456            | 1.43456              | 1 up vs 2            | 20.0064       | 51.5721        | 15.4667   | 1        | -3.28526               | 2.62758                | 2.52901                | -2.14583               | -3.83991               | -1.0719                | 3.77631                | 2.90999                |
| LOC442060 | 0.214584          | -1.58088            | 1.58088              | 1 up vs 2            | 1.92556       | 105.546        | 328.879   | 1        | -11.7944               | -2.78111               | -2.22527               | 3.34303                | -5.33573               | 1.36196                | 15.2522                | 2.92745                |
| LOC442388 | 0.224758          | 330.19              | 330.19               | 1 up vs 2            | 1.83108       | 510411         | 1.67E+06  | 1        | -6.92743               | 3.15375                | 7.29563                | 1579.05                | -2.12839               | -8.67397               | 19.2778                | -13.1285               |
| LOC554235 | 0.0236759         | 18.0218             | 18.0218              | 1 up vs 2            | 9.06495       | 12529.1        | 8292.91   | 1        | -20.1459               | -4.04082               | -8.8971                | -148.415               | -91.0804               | -6.80281               | -2.25275               | -2.01825               |
| LOC641738 | 0.40635           | 18.3201             | 18.3201              | 1 up vs 2            | 0.797075      | 30.4312        | 229.072   | 1        | 14.5697                | -2.34115               | 2.1234                 | -4.13028               | 2.34432                | 3.43515                | -4.56877               | 2.51437                |
| LOC641938 | 0.497096          | 2.38391             | 2.38391              | 1 up vs 2            | 0.522192      | 55.5264        | 638       | 1        | -21.0946               | -18.505                | -5.05919               | -9.905                 | 2.87716                | 5.86281                | 2.4292                 | -4.38914               |
| LOC642072 | 0.177123          | -67.7934            | 67.7934              | 1 up vs 2            | 2.33795       | 6264.81        | 16077.7   | 1        | -160.243               | -3.31094               | 2.83236                | -2.5                   | -8.14643               | -3.50182               | 3.60309                | 4.57854                |
| LOC642197 | 0.061867          | -4.70838            | 4.70838              | 1 up vs 2            | 5.24826       | 448.401        | 512.628   | 1        | -5.51049               | 4.7837                 | 2.28509                | -2.08226               | -30.6732               | -1.10332               | 5.17221                | 2.40765                |
| LOC642290 | 0.218445          | -330.186            | 330.186              | 1 up vs 2            | 1.88896       | 211.173        | 670.762   | 1        | -30.6746               | 3.61271                | -3.28392               | 2.47517                | -3.54201               | 1.47521                | 2.3118                 | -3.95558               |
| LOC642316 | 0.0399634         | -2.76413            | 2.76413              | 1 up vs 2            | 6.82737       | 286.134        | 251.459   | 1        | 17.2324                | -11.011                | 2.41607                | 2.31546                | 7.6666                 | -7.10368               | -2.93407               | 2.22341                |
| LOC642356 | 0.143477          | -1.52129            | 1.52129              | 1 up vs 2            | 2.83057       | 50.497         | 107.039   | 1        | -3.58228               | 6.36531                | -6.44104               | -2.83526               | -2.97628               | 6.047                  | 2.11178                | 2.20848                |
| LOC642398 | 0.107595          | -3.89345            | 3.89345              | 1 up vs 2            | 3.57355       | 142.559        | 239.357   | 1        | -11.5601               | 13.3501                | -3.622                 | -2.74006               | -6.51296               | -2.09505               | 3.76209                | -2.48567               |
| LOC642408 | 0.289777          | -10.7656            | 10.7656              | 1 up vs 2            | 1.3477        | 705.782        | 3142.17   | 1        | -59.6783               | 2.42383                | -6.13288               | 4.37999                | 2.04092                | -5.46467               | 20.7782                | -3.35945               |
| LOC642681 | 0.0606564         | -2.39037            | 2.39037              | 1 up vs 2            | 5.31451       | 252.347        | 284.896   | 1        | -9.13333               | 4.31998                | 16.2079                | -3.35759               | -12.047                | -2.44569               | 2.38619                | -3.35953               |
| LOC643219 | 0.23784           | -1.045              | 1.045                | 1 up vs 2            | 1.71835       | 333.383        | 1164.08   | 1        | -4.76692               | -2.28176               | 2.73154                | -12.1798               | -3.49492               | -1.41575               | 36.208                 | -2.63982               |
| LOC643246 | 0.856044          | 1.84203             | 1.84203              | 1 up vs 2            | 0.0358625     | 2.33451        | 390.578   | 1        | -5.3899                | 4.00832                | -6.67909               | -2.30931               | 15.0222                | 3.81197                | 8.5274                 | -3.04276               |
| LOC643326 | 0.153579          | 22.9791             | 22.9791              | 1 up vs 2            | 2.66683       | 1155.19        | 2599.02   | 1        | -8.95777               | -5.07632               | 4.08709                | -66.8721               | -2.02228               | 1.88925                | -4.28207               | -2.26454               |
| LOC643495 | 0.23299           | -887.245            | 887.245              | 1 up vs 2            | 1.75907       | 2314.45        | 7894.34   | 1        | 105.92                 | -2.96686               | -4.56713               | -3.50151               | 2.86372                | 1.6613                 | 15.1073                | -9.43238               |
| LOC643558 | 0.148296          | 7.3322              | 7.3322               | 1 up vs 2            | 2.75051       | 65.1291        | 142.074   | 1        | -3.97656               | 2.23776                | 2.42547                | -5.35054               | -11.1462               | -6.56733               | 4.08614                | -6.83578               |
| LOC643817 | 0.131741          | -1.91902            | 1.91902              | 1 up vs 2            | 3.04227       | 30.3994        | 59.9541   | 1        | -3.36634               | 4.66615                | 2.98281                | -2.18466               | -2.39037               | -1.3156                | 4.53104                | -3.96733               |
| LOC643906 | 0.444067          | -2.76723            | 2.76723              | 1 up vs 2            | 0.670836      | 73.3517        | 656.063   | 1        | 5.92685                | -2.46599               | 11.305                 | -2.18702               | 2.16019                | 7.16619                | -3.57041               | -4.13336               |
| LOC643920 | 0.79852           | -1.05664            | 1.05664              | 1 up vs 2            | 0.09712085    | 2.89837        | 244.215   | 1        | -7.19051               | 8.28299                | 4.1285                 | 7.78375                | -2.50955               | -1.16813               | -2.1265                | -6.09421               |
| LOC643938 | 0.106394          | -2.34082            | 2.34082              | 1 up vs 2            | 3.60422       | 986.221        | 1641.78   | 1        | 5.38258                | 3.29373                | 6.58796                | -10.2865               | -43.3045               | 24.0224                | -2.09382               | 2.51414                |
| LOC644019 | 0.830796          | 1.48105             | 1.48105              | 1 up vs 2            | 0.0498113     | 11.22          | 1351.5    | 1        | -4.81076               | 5.33323                | 3.76556                | -2.82264               | -14.9608               | -2.19787               | 4.15967                | -36.4865               |
| LOC644035 | 0.355505          | 3.22252             | 3.22252              | 1 up vs 2            | 1.00185       | 77.7315        | 465.527   | 1        | 13.8127                | 6.53516                | 5.73734                | -5.98894               | 20.1834                | -5.23421               | 2.27772                | 5.16912                |
| LOC644065 | 0.292709          | 9.09197             | 9.09197              | 1 up vs 2            | 1.32976       | 75.2036        | 339.327   | 1        | -5.16977               | -3.18622               | -6.7534                | -18.5516               | 2.37404                | -3.51823               | 6.2005                 | 3.34413                |
| LOC644193 | 0.217432          | -611.343            | 611.343              | 1 up vs 2            | 1.89847       | 53945.6        | 170492    | 1        | -3.77307               | 4.65187                | -3.18867               | 2.1087                 | -506.365               | 1.4683                 | -6.43759               | 4.8911                 |
| LOC644330 | 0.0980662         | -3.79895            | 3.79895              | 1 up vs 2            | 3.83089       | 39.6467        | 62.0952   | 1        | -5.92535               | 3.01997                | 2.34204                | -2.47209               | -2.52303               | -3.44594               | 5.19506                | -2.32013               |
| LOC644415 | 0.0926722         | -1.39503            | 1.39503              | 1 up vs 2            | 3.99234       | 265.25         | 398.639   | 1        | -2.46154               | 6.51457                | 18.5094                | -15.1828               | -3.13925               | 1.52109                | 3.05961                | -4.77411               |
| LOC644452 | 0.89613           | 1.20101             | 1.20101              | 1 up vs 2            | 0.018546      | 5.83896        | 1889.02   | 1        | 41.9195                | 10.2433                | 23.8291                | -2.0279                | -8.26087               | -3.55076               | 5.36577                | 8.00705                |
| LOC644563 | 0.0767571         | -7.97039            | 7.97039              | 1 up vs 2            | 4.55504       | 542.336        | 714.377   | 1        | -33.758                | -9.80292               | 2.40004                | -3.7655                | -7.81039               | 3.99209                | 5.51133                | 7.37911                |
| LOC644650 | 0.0461296         | -3.32316            | 3.32316              | 1 up vs 2            | 6.28185       | 284.685        | 271.912   | 1        | -2.85325               | 4.88763                | 2.13555                | -2.76169               | -22.8004               | 2.47293                | 2.07851                | 2.67655                |
| LOC644684 | 0.000372241       | -1.27138            | 1.27138              | 1 up vs 2            | 51.3804       | 77.1862        | 9.0135    | 1        | -4.34941               | 3.98918                | 2.17262                | -2.297                 | -4.12756               | 1.15542                | 4.19028                | 2.61625                |
| LOC644710 | 0.270118          | 3.87913             | 3.87913              | 1 up vs 2            | 1.47545       | 240.572        | 978.3     | 1        | -11.6724               | -7.19819               | 2.84046                | -13.9409               | -20.1709               | 3.49699                | 10.1899                | -29.0003               |

| Gene ID   | p-value (1 vs. 2) | MeanRatio (1 vs. 2) | FoldChange (1 vs. 2) | FoldChange (1 vs. 2) | F(Gene Group) | SS(Gene Group) | SS(Error) | F(Error) | FoldChange (106 vs. n) | FoldChange (111 vs. n) | FoldChange (112 vs. n) | FoldChange (121 vs. n) | FoldChange (347 vs. n) | FoldChange (353 vs. n) | FoldChange (537 vs. n) | FoldChange (563 vs. n) |
|-----------|-------------------|---------------------|----------------------|----------------------|---------------|----------------|-----------|----------|------------------------|------------------------|------------------------|------------------------|------------------------|------------------------|------------------------|------------------------|
| LOC644964 | 0.844768          | 1.46928             | 1.46928              | 1 up vs 2            | 0.041796      | 6.15399        | 883.433   | 1        | 22.9636                | 7.69774                | -5.59313               | -3.65518               | -2.2918                | -4.72437               | 2.14707                | 19.7754                |
| LOC645029 | 0.186617          | -1.10734            | 1.10734              | 1 up vs 2            | 2.22234       | 181.201        | 489.216   | 1        | 2.45724                | -5.30713               | -2.54873               | -13.2283               | -4.7259                | 17.5302                | 2.3765                 | 11.2738                |
| LOC645381 | 0.0202633         | -2.64357            | 2.64357              | 1 up vs 2            | 9.81179       | 241.676        | 147.787   | 1        | -7.1007                | 3.4894                 | 2.87568                | -2.37212               | -15.2388               | 2.96122                | 8.73264                | -2.47921               |
| LOC645413 | 0.688571          | 2.4433              | 2.4433               | 1 up vs 2            | 0.177056      | 8.89829        | 301.542   | 1        | -11.8915               | 2.50727                | -2.38588               | 9.29537                | -8.4674                | 1.32896                | -4.44874               | -4.54845               |
| LOC645520 | 0.425841          | 16.7014             | 16.7014              | 1 up vs 2            | 0.729451      | 16.5466        | 136.102   | 1        | -2.44528               | 4.12481                | -9.38619               | -2.76614               | -4.26817               | -2.30936               | 2.31353                | 4.31122                |
| LOC645534 | 0.933786          | 1.18568             | 1.18568              | 1 up vs 2            | 0.00750432    | 0.829948       | 663.577   | 1        | -4.73122               | 4.80333                | 2.70758                | -2.79549               | -5.21856               | -25.4318               | 4.86607                | -4.86074               |
| LOC645785 | 0.124952          | -10.5714            | 10.5714              | 1 up vs 2            | 3.17713       | 720.829        | 1361.28   | 1        | -4.02468               | -5.22197               | 2.96779                | -2.47025               | -47.2433               | 2.52152                | 2.1135                 | 6.09142                |
| LOC645822 | 0.503977          | 2.25562             | 2.25562              | 1 up vs 2            | 0.505019      | 35.1512        | 417.622   | 1        | -14.0419               | 2.9824                 | -3.80783               | -3.6723                | -5.62031               | -8.84406               | 8.17311                | -15.7454               |
| LOC645835 | 0.79811           | 2.42986             | 2.42986              | 1 up vs 2            | 0.0715065     | 1.89766        | 159.23    | 1        | 3.4106                 | -5.64522               | 7.21716                | -4.02051               | 5.73873                | -3.35879               | 2.1856                 | 3.11916                |
| LOC645983 | 0.168923          | 10.2181             | 10.2181              | 1 up vs 2            | 2.44512       | 578.687        | 1420.02   | 1        | 6.93047                | 6.4604                 | 10.7496                | 48.353                 | 3.13784                | -1.15031               | -3.12892               | -3.40172               |
| LOC646139 | 0.278412          | -1.79028            | 1.79028              | 1 up vs 2            | 1.4199        | 77.7455        | 328.526   | 1        | 3.01269                | 2.0847                 | -3.4756                | 15.5079                | -6.12603               | -8.79102               | -4.18805               | 2.8312                 |
| LOC646187 | 0.0062618         | -2.44609            | 2.44609              | 1 up vs 2            | 16.9208       | 289.593        | 102.688   | 1        | -3.08674               | 5.40869                | 5.03934                | -14.3864               | -8.99118               | -1.82741               | 5.58854                | 3.82253                |
| LOC646332 | 0.194161          | -1.7364             | 1.7364               | 1 up vs 2            | 2.13629       | 12627.2        | 35464.8   | 1        | -157.475               | 152.163                | -2.04439               | 3.63166                | -2.37939               | 1.64444                | 6.761                  | -8.57534               |
| LOC646358 | 0.0798798         | -1.59182            | 1.59182              | 1 up vs 2            | 4.43268       | 36.5798        | 49.5138   | 1        | -2.81613               | 3.36934                | 2.46269                | -3.20106               | -2.12104               | -1.24724               | 6.2527                 | -2.31658               |
| LOC646388 | 0.294568          | 15.5678             | 15.5678              | 1 up vs 2            | 1.31852       | 561.958        | 2557.22   | 1        | -2.71677               | 4.05651                | 14.2095                | -4.10808               | -48.6768               | 1.2837                 | 5.31625                | -30.8079               |
| LOC646492 | 0.0196578         | -2.43003            | 4.63003              | 1 up vs 2            | 9.96204       | 92.4889        | 55.7048   | 1        | -6.72781               | 5.09563                | 3.36513                | -6.54404               | -4.05575               | -2.67494               | 2.91688                | -2.4653                |
| LOC647049 | 0.780384          | -7.55012            | 7.55012              | 1 up vs 2            | 0.0850525     | 22.5413        | 1590.17   | 1        | -4.67442               | -31.8805               | 5.50988                | 9.03845                | -13.5493               | 6.21924                | 11.6503                | 10.5287                |
| LOC647135 | 0.10212           | -1.86496            | 1.86496              | 1 up vs 2            | 3.71739       | 323.872        | 522.741   | 1        | -19.4649               | 17.0163                | 2.27696                | -4.02224               | -2.17886               | -4.3122                | 11.1457                | -3.18974               |
| LOC647468 | 0.0812892         | -1.80617            | 1.80617              | 1 up vs 2            | 4.37958       | 305.18         | 418.095   | 1        | -11.5522               | 4.4554                 | -4.3277                | -4.97141               | -8.11086               | -1.70323               | 3.12954                | 21.1778                |
| LOC647529 | 0.0791621         | -1.58835            | 1.58835              | 1 up vs 2            | 4.46022       | 544.696        | 732.739   | 1        | -7.40193               | 24.9964                | -4.2589                | -2.93009               | -21.0457               | -1.27639               | 10.9272                | 2.6746                 |
| LOC647544 | 0.077398          | -1.09481            | 1.09481              | 1 up vs 2            | 4.52938       | 581.7          | 770.57    | 1        | -6.4038                | 28.4006                | -4.61037               | -3.39366               | -17.8188               | 1.10198                | 12.5831                | 4.56578                |
| LOC647592 | 0.303412          | 217.647             | 217.647              | 1 up vs 2            | 1.26653       | 23.5026        | 111.34    | 1        | -8.60598               | -2.86494               | -2.78559               | 2.07628                | -4.14064               | 2.55879                | -2.15079               | 5.16082                |
| LOC647704 | 0.209234          | 7.5134              | 7.5134               | 1 up vs 2            | 1.97789       | 839.484        | 2546.6    | 1        | -64.2812               | -3.49233               | 2.17605                | -3.05416               | -5.88902               | -4.78057               | 2.65018                | -12.7964               |
| LOC647876 | 0.361143          | 2.74422             | 2.74422              | 1 up vs 2            | 0.976854      | 94.3269        | 333.685   | 1        | -6.52824               | -9.67326               | 3.5497                 | -16.4605               | -2.41783               | -1.49349               | 4.04389                | -12.2172               |
| LOC648025 | 0.138596          | -2.1274             | 2.1274               | 1 up vs 2            | 2.91557       | 477.22         | 982.078   | 1        | -4.81711               | 4.31504                | 2.32615                | -34.2972               | 6.55722                | 2.25646                | 13.5943                | 3.01424                |
| LOC648494 | 0.15212           | -2.57402            | 2.57402              | 1 up vs 2            | 2.68953       | 157.323        | 350.967   | 1        | -4.58628               | 2.99648                | 2.81456                | -3.03769               | -12.1672               | -3.65208               | 16.4872                | -5.83145               |
| LOC648639 | 0.10493           | -1.89901            | 1.89901              | 1 up vs 2            | 3.64228       | 1331.5         | 2193.41   | 1        | -29.6028               | -2.77737               | 2.16683                | -12.9077               | -9.85787               | 1.56687                | 48.6017                | -3.59703               |
| LOC648716 | 0.0299318         | -1.64414            | 1.64414              | 1 up vs 2            | 8.01263       | 162.645        | 121.791   | 1        | -2.32196               | 2.36101                | 9.10499                | -10.2713               | -4.78053               | -3.106                 | 2.41489                | 6.83699                |
| LOC648718 | 0.207283          | 22.7609             | 22.7609              | 1 up vs 2            | 1.99745       | 2126.15        | 6386.57   | 1        | -92.7477               | -13.7636               | -2.42314               | -8.9368                | -3.98018               | -1.35285               | 29.1622                | -19.3599               |
| LOC649371 | 0.485598          | -27.9095            | 27.9095              | 1 up vs 2            | 0.551908      | 45.5033        | 494.683   | 1        | 3.29169                | 8.91743                | 4.87563                | -15.4357               | -2.12367               | -1.04506               | 2.23542                | -14.1314               |
| LOC649477 | 0.163497          | -1.88775            | 1.88775              | 1 up vs 2            | 2.52016       | 5556.84        | 13229.7   | 1        | -100.035               | 52.2696                | -4.03128               | -4.21528               | -2.51235               | 1.00637                | 72.5698                | -27.5553               |
| LOC649944 | 0.300687          | -1.26596            | 1.26596              | 1 up vs 2            | 1.2823        | 540.464        | 2528.88   | 1        | -42.1492               | 4.65927                | 5.61092                | -7.54525               | 21.2386                | 2.2268                 | 27.0625                | -2.09661               |
| LOC649946 | 0.00178969        | -1.67107            | 1.67107              | 1 up vs 2            | 28.3366       | 143.773        | 30.4425   | 1        | -6.43616               | 3.72691                | 2.43645                | -2.23399               | -7.76479               | 1.2092                 | 2.84395                | 6.17513                |
| LOC650005 | 0.716644          | -2.85553            | 2.85553              | 1 up vs 2            | 0.144821      | 142.679        | 5911.28   | 1        | -3.00082               | 2.47071                | 8.9705                 | 44.1971                | -60.5785               | -1.28243               | 13.6358                | -12.4819               |
| LOC650325 | 0.408417          | 6.36171             | 6.36171              | 1 up vs 2            | 0.789647      | 264.701        | 2011.29   | 1        | -2.17924               | -2.1054                | 2.5196                 | -3.67409               | 48.1464                | 12.8827                | 6.52545                | -8.74224               |
| LOC650330 | 0.205322          | 5.03807             | 5.03807              | 1 up vs 2            | 2.01739       | 264.086        | 785.427   | 1        | 2.70843                | 7.38525                | -2.79888               | 36.1387                | 5.57339                | -1.03984               | 8.43239                | 2.71603                |
| LOC650494 | 0.250806          | 5.13063             | 5.13063              | 1 up vs 2            | 1.61524       | 3865.2         | 14357.7   | 1        | -12.1541               | -15.5448               | -10.7875               | -153.713               | -3.31745               | -9.85301               | -2.85964               | -15.914                |
| LOC650612 | 0.321681          | 5.01565             | 5.01565              | 1 up vs 2            | 1.16614       | 400.181        | 2059.01   | 1        | -9.61376               | 9.81123                | -3.30175               | -47.5322               | 2.40402                | -2.01721               | -25.4496               | 2.76695                |
| LOC650803 | 0.00942581        | -2.15278            | 2.15278              | 1 up vs 2            | 14.1191       | 214.486        | 91.1473   | 1        | -2.52121               | 2.32474                | 2.04843                | -5.12095               | -14.267                | 1.64961                | 5.01665                | 5.92252                |
| LOC650834 | 0.176296          | 8.23395             | 8.23395              | 1 up vs 2            | 2.34844       | 138.062        | 352.734   | 1        | 18.8604                | 2.39298                | -2.56702               | 13.5324                | -3.09122               | -4.6449                | 3.65805                | 7.09194                |
| LOC650853 | 0.00619408        | -1.57389            | 1.57389              | 1 up vs 2            | 17.0007       | 50.201         | 17.7173   | 1        | -2.14299               | 2.22528                | 2.73756                | -2.49498               | -4.85411               | -1.06188               | 3.81316                | 2.33747                |
| LOC651208 | 0.186751          | 15.2002             | 15.2002              | 1 up vs 2            | 2.22077       | 82.1581        | 221.972   | 1        | 3.92292                | 4.50825                | -11.3434               | 4.80452                | 12.5295                | 3.27007                | 2.19111                | 3.70475                |
| LOC651319 | 0.804103          | 3.11612             | 3.11612              | 1 up vs 2            | 0.0672143     | 3.1404         | 280.333   | 1        | -2.94298               | 3.86713                | 3.19858                | -5.85392               | 3.07965                | -1.92006               | 5.33656                | -13.5401               |
| LOC651371 | 0.247806          | 17.6414             | 17.6414              | 1 up vs 2            | 1.63839       | 17268.7        | 63240.5   | 1        | 3.12841                | 6.7596                 | 6.10813                | 306.936                | -4.85785               | 2.70388                | 12.0435                | 10.8584                |
| LOC651603 | 0.488216          | -3.85498            | 3.85498              | 1 up vs 2            | 0.545028      | 30.5298        | 336.091   | 1        | -6.04371               | 3.05887                | 7.69774                | 12.7552                | 2.90059                | -3.84723               | -8.53888               | -2.5262                |
| LOC651619 | 0.253685          | -23.4913            | 23.4913              | 1 up vs 2            | 1.5934        | 157.486        | 593.018   | 1        | -3.17903               | 2.97302                | 5.22328                | -25.3664               | 2.17382                | -3.81201               | -8.78795               | 6.27468                |
| LOC651732 | 0.576653          | -12.7387            | 12.7387              | 1 up vs 2            | 0.348224      | 27.1891        | 468.475   | 1        | -4.91528               | -6.02743               | -5.24521               | -3.30511               | -2.37208               | 10.4679                | -10.9407               | 13.1313                |
| LOC651809 | 0.0890549         | -1.39109            | 1.39109              | 1 up vs 2            | 4.10801       | 1191.98        | 1740.96   | 1        | 2.47011                | -2.26777               | -15.6006               | 43.9067                | -2.37067               | -2.81145               | -5.22687               | -26.8173               |
| LOC652077 | 0.872939          | 1.6685              | 1.6685               | 1 up vs 2            | 0.0278524     | 5.48187        | 1180.91   | 1        | -12.9756               | -28.2231               | -7.44173               | -3.52871               | 3.70134                | 9.75047                | 2.05654                | 11.0689                |
| LOC652355 | 0.238284          | 211.882             | 211.882              | 1 up vs 2            | 1.71469       | 171.807        | 601.182   | 1        | -2.08713               | 2.60565                | -2.84574               | -28.8748               | 2.10864                | -1.19522               | 3.69398                | -2.48563               |
| LOC652383 | 0.70039           | 2.75379             | 2.75379              | 1 up vs 2            | 0.163018      | 12.7116        | 467.86    | 1        | 19.1993                | 10.0044                | -3.90363               | -4.47037               | -2.46377               | 1.06618                | -2.86038               | 3.11662                |
| LOC652388 | 0.0620342         | -6.06647            | 6.06647              | 1 up vs 2            | 5.23924       | 131.235        | 150.291   | 1        | -15.0698               | 3.43009                | 2.09152                | -3.68696               | -2.78985               | -2.35964               | 5.74145                | -2.98383               |

| Gene ID   | p-value (1 vs. 2) | MeanRatio (1 vs. 2) | FoldChange (1 vs. 2) | FoldChange (1 vs. 2) | F(Gene Group) | SS(Gene Group) | SS(Error) | F(Error) | FoldChange (106 vs. n) | FoldChange (111 vs. n) | FoldChange (112 vs. n) | FoldChange (121 vs. n) | FoldChange (347 vs. n) | FoldChange (353 vs. n) | FoldChange (537 vs. n) | FoldChange (563 vs. n) |
|-----------|-------------------|---------------------|----------------------|----------------------|---------------|----------------|-----------|----------|------------------------|------------------------|------------------------|------------------------|------------------------|------------------------|------------------------|------------------------|
| LOC652526 | 0.0854603         | -5.99572            | 5.99572              | 1 up vs 2            | 4.22951       | 283.365        | 401.982   | 1        | -20.8508               | 9.83007                | -7.92994               | -8.26862               | -2.48896               | 2.39219                | 7.98271                | -3.48865               |
| LOC652571 | 0.361377          | 11.1326             | 11.1326              | 1 up vs 2            | 0.975831      | 17.0144        | 104.615   | 1        | 10.2731                | 2.13654                | -2.1673                | 2.34083                | -2.68495               | 1.5083                 | 2.02391                | -2.01498               |
| LOC652730 | 0.816424          | 1.63808             | 1.63808              | 1 up vs 2            | 0.0588363     | 14.445         | 1473.07   | 1        | -8.24368               | -35.5466               | 2.50471                | -2.59722               | -10.5358               | 2.41693                | 14.9074                | -6.03224               |
| LOC653088 | 0.731809          | 3.60616             | 3.60616              | 1 up vs 2            | 0.128963      | 3.72596        | 173.35    | 1        | 2.32904                | -9.61333               | 2.51828                | 5.81039                | -2.28771               | 1.31315                | 2.51828                | 5.87364                |
| LOC653103 | 0.131269          | -6.99938            | 6.99938              | 1 up vs 2            | 3.05133       | 394.452        | 775.635   | 1        | -6.15429               | 21.6245                | -3.18829               | -7.64926               | -24.2698               | -6.35999               | 4.2867                 | -7.29704               |
| LOC653147 | 0.00154374        | -1.15065            | 1.15065              | 1 up vs 2            | 30.0279       | 135.988        | 27.1724   | 1        | -7.75124               | 6.3849                 | 2.75651                | -2.21042               | -3.70761               | 2.60147                | 4.91079                | 3.14564                |
| LOC653249 | 0.309221          | -16.0607            | 16.0607              | 1 up vs 2            | 1.23362       | 126.942        | 617.41    | 1        | -2.44188               | -12.4082               | 2.6981                 | 2.81014                | -23.6058               | 2.57442                | 2.12505                | 7.42206                |
| LOC653349 | 0.189657          | 4.24986             | 4.24986              | 1 up vs 2            | 2.18708       | 63.0986        | 173.104   | 1        | 9.83619                | 2.43545                | 3.67618                | 4.67006                | 8.25208                | -2.57518               | 10.8928                | -5.50413               |
| LOC653803 | 0.0589748         | -1.02932            | 1.02932              | 1 up vs 2            | 5.40958       | 1138.78        | 1263.07   | 1        | -14.7435               | 9.18048                | 17.931                 | -6.6374                | -16.1199               | -3.18234               | 39.0746                | -2.28291               |
| LOC654134 | 0.884088          | 1.33393             | 1.33393              | 1 up vs 2            | 0.0231368     | 6.33774        | 1643.55   | 1        | -6.64174               | -3.47522               | 2.88227                | 30.8041                | -2.12982               | 1.84378                | -4.04179               | 30.3193                |
| LOC654350 | 0.017538          | -1.40109            | 1.40109              | 1 up vs 2            | 10.5413       | 193.254        | 109.998   | 1        | -12.0795               | 7.67538                | 4.22798                | -2.30265               | -3.3901                | -1.02822               | 7.52281                | 2.74304                |
| LOC654433 | 0.800744          | 1.85296             | 1.85296              | 1 up vs 2            | 0.0696019     | 97.2577        | 8384.06   | 1        | 66.1132                | 3.99784                | 2.36617                | -56.3285               | 37.1529                | 6.65648                | 9.18756                | 20.0106                |
| LOC727768 | 0.258391          | 88.5803             | 88.5803              | 1 up vs 2            | 1.55849       | 302.795        | 1165.73   | 1        | -16.4417               | 4.36564                | -2.36578               | 12.3705                | -34.4878               | -1.55076               | -3.82087               | 2.64627                |
| LOC727896 | 0.819491          | 1.53852             | 1.53852              | 1 up vs 2            | 0.0568429     | 1.92706        | 203.409   | 1        | 7.80269                | 9.1344                 | -3.39542               | -3.14816               | 4.03451                | -1.48113               | 7.51605                | -2.36111               |
| LOC727934 | 0.142193          | -3.65581            | 3.65581              | 1 up vs 2            | 2.85253       | 287.243        | 604.187   | 1        | -24.8512               | 15.5552                | 2.4799                 | -2.12806               | -2.17714               | -1.20114               | 2.71302                | -6.2547                |
| LOC728196 | 0.128312          | -1.03846            | 1.03846              | 1 up vs 2            | 3.10915       | 370.946        | 715.847   | 1        | -6.37658               | 2.07818                | 30.013                 | -10.8986               | -4.22108               | 1.72215                | -3.0011                | 3.68809                |
| LOC728257 | 0.0396158         | -1.10328            | 1.10328              | 1 up vs 2            | 6.86148       | 411.143        | 359.523   | 1        | -14.8993               | 9.88978                | 2.31907                | -5.46644               | -2.93695               | -2.60757               | 6.08537                | 19.5154                |
| LOC728649 | 0.683586          | 2.5489              | 2.5489               | 1 up vs 2            | 0.183186      | 16.9275        | 554.439   | 1        | -3.35552               | 4.58897                | 6.62299                | -7.83391               | -3.64418               | -21.8701               | 3.39543                | -2.43664               |
| LOC728728 | 0.407162          | 4.60507             | 4.60507              | 1 up vs 2            | 0.79415       | 264.832        | 2000.87   | 1        | 49.2553                | 5.32956                | -4.23621               | -7.78155               | 4.06999                | 5.16127                | 12.7994                | -2.57082               |
| LOC728804 | 0.022743          | -1.76988            | 1.76988              | 1 up vs 2            | 1.80894       | 43.9791        | 154.873   | 1        | 2.62116                | 6.56061                | 2.79913                | -8.69214               | -3.21284               | 2.41415                | -5.74909               | 2.71763                |
| LOC729047 | 0.444284          | 6.61383             | 6.61383              | 1 up vs 2            | 0.670166      | 41.5683        | 372.162   | 1        | -4.52135               | 3.95043                | 2.48219                | -18.3592               | 6.23893                | -1.6396                | -6.32784               | -2.65882               |
| LOC729051 | 0.986763          | 1.03403             | 1.03403              | 1 up vs 2            | 0.00029908    | 0.0766141      | 1537.02   | 1        | -2.47285               | -6.76266               | -3.44214               | -5.29952               | -10.6565               | -35.0576               | -3.86748               | 19.4258                |
| LOC729135 | 0.531336          | -1.22317            | 1.22317              | 1 up vs 2            | 0.440954      | 100.853        | 1372.29   | 1        | -2.93792               | 35.9338                | -4.59227               | -2.2813                | -6.88617               | -1.72412               | -4.02217               | -9.10063               |
| LOC729533 | 0.17294           | -3.8583             | 3.8583               | 1 up vs 2            | 2.39172       | 27.0759        | 67.924    | 1        | -3.54432               | 2.83584                | 3.55578                | -2.53893               | -2.9704                | 1.58204                | 2.38636                | -6.44912               |
| LOC729609 | 0.158491          | -12.8377            | 12.8377              | 1 up vs 2            | 2.59258       | 2058.15        | 4763.17   | 1        | -3.18703               | 2.2927                 | 2.44138                | -2.08353               | -86.9404               | -1.17717               | 2.62797                | 5.78649                |
| LOC729666 | 0.145897          | -41.4703            | 41.4703              | 1 up vs 2            | 2.7899        | 1773.97        | 3815.14   | 1        | -4.9369                | 8.71448                | 2.1995                 | -79.5232               | -5.64434               | -6.14545               | 2.93769                | -4.08498               |
| LOC729887 | 0.545864          | 2.76909             | 2.76909              | 1 up vs 2            | 0.409506      | 139.398        | 2042.43   | 1        | 5.75374                | -25.3148               | -14.9213               | -5.06084               | -41.1818               | 3.40742                | 5.84998                | 6.60915                |
| LOC729898 | 0.0225039         | -1.62246            | 1.62246              | 1 up vs 2            | 9.3042        | 68.3968        | 44.1071   | 1        | -2.32601               | 3.70952                | 2.76658                | -3.11102               | -5.77293               | 2.17519                | 5.5462                 | -2.68212               |
| LOC729905 | 0.00286862        | -2.91555            | 2.91555              | 1 up vs 2            | 23.4659       | 123.342        | 31.5373   | 1        | -5.21308               | 3.98601                | 2.06448                | -6.12638               | -6.77826               | 1.61895                | 4.90546                | -2.21796               |
| LOC730105 | 0.493927          | 4.15179             | 4.15179              | 1 up vs 2            | 0.530254      | 12.3162        | 139.362   | 1        | -3.46626               | 7.93984                | -2.78917               | -2.42104               | -4.241                 | -6.87966               | -4.34008               | 2.00323                |
| LOC730379 | 0.142234          | -2.60244            | 2.60244              | 1 up vs 2            | 2.85182       | 9804.75        | 20628.4   | 1        | -146.344               | -2.41106               | -4.22703               | -2.67159               | -7.70381               | 8.5717                 | 2.28429                | 96.1491                |
| LOC732157 | 0.163079          | -11.0941            | 11.0941              | 1 up vs 2            | 2.52608       | 2821.06        | 6700.64   | 1        | -2.098                 | 5.19561                | 5.69317                | -2.44052               | -102.206               | -2.23245               | 4.72826                | 2.6516                 |
| LOC732393 | 0.317627          | 2.07948             | 2.07948              | 1 up vs 2            | 1.18764       | 7.59503        | 38.3703   | 1        | -3.18525               | -4.26516               | -3.29499               | -6.09125               | -2.35472               | -1.11785               | -3.28408               | 2.63987                |
| LOC81691  | 0.0982271         | -1.89256            | 1.89256              | 1 up vs 2            | 3.82626       | 1776.81        | 2786.23   | 1        | -58.479                | 29.7189                | 9.51496                | 3.01109                | -4.95593               | 7.26698                | 9.14532                | -2.43448               |
| LONRF2    | 0.0197682         | -3.08417            | 3.08417              | 1 up vs 2            | 9.93418       | 348.807        | 210.671   | 1        | -13.9326               | 5.36831                | 2.3049                 | -13.8076               | -3.15905               | 1.75137                | 11.5831                | -4.3099                |
| LPPR4     | 0.0251247         | -16.0624            | 16.0624              | 1 up vs 2            | 8.7903        | 6543.11        | 4466.14   | 1        | -103.97                | -2.81343               | 2.2304                 | -17.2792               | -45.5843               | 4.83847                | 22.2772                | -9.22171               |
| LPXN      | 0.0094712         | -1.11821            | 1.11821              | 1 up vs 2            | 14.0884       | 86.3594        | 36.7789   | 1        | -2.68556               | 5.17007                | 2.71556                | -2.78581               | -5.2767                | -1.43215               | 3.81245                | 5.75376                |
| LRFN5     | 0.169567          | -4.44679            | 4.44679              | 1 up vs 2            | 2.43644       | 947.771        | 2333.99   | 1        | -18.5633               | -16.551                | -2.17407               | -4.94645               | -31.5556               | 6.09782                | 41.0863                | -7.82046               |
| LRRC16    | 0.0334734         | -2.91861            | 2.91861              | 1 up vs 2            | 7.53992       | 218.523        | 173.893   | 1        | -6.87446               | -2.41677               | 2.27192                | -9.27697               | -7.97057               | 2.28452                | 13.7245                | -2.08935               |
| LRRC1     | 0.344051          | 12.3226             | 12.3226              | 1 up vs 2            | 1.05463       | 157.232        | 894.523   | 1        | -2.33566               | 7.2823                 | -2.95292               | 4.95543                | -32.5181               | 1.01281                | -3.82721               | -5.55881               |
| LUC7L     | 0.104556          | -3.33413            | 3.33413              | 1 up vs 2            | 3.65211       | 237.071        | 389.481   | 1        | -21.704                | -3.53144               | -2.74325               | -2.22707               | -2.0191                | 6.34567                | 2.98473                | 9.91628                |
| LYN       | 0.0081865         | -1.97066            | 1.97066              | 1 up vs 2            | 15.0415       | 83.9844        | 33.5012   | 1        | -2.14223               | 3.61648                | 3.39938                | -7.19704               | -3.97995               | -1.59365               | 3.80028                | 2.04211                |
| LYNX1     | 0.220503          | 16.8119             | 16.8119              | 1 up vs 2            | 1.86982       | 4991.21        | 16016.1   | 1        | -157.706               | -7.39174               | -7.25146               | -2.88465               | -3.98151               | 3.30361                | 3.48985                | -8.46531               |
| LYPLAL1   | 0.00681671        | -1.52026            | 1.52026              | 1 up vs 2            | 16.3069       | 90.9977        | 33.4818   | 1        | -6.83997               | 4.39299                | 2.83079                | -2.0476                | -3.71932               | -1.21789               | 4.41723                | 3.39789                |
| LZTS1     | 0.0234492         | -3.59836            | 3.59836              | 1 up vs 2            | 9.10996       | 3123.6         | 2057.26   | 1        | -52.7996               | 6.73208                | 2.07026                | -5.6962                | -37.3228               | 2.88393                | 35.1351                | -2.44071               |
| MAGEA2    | 0.0201759         | -4.03069            | 4.03069              | 1 up vs 2            | 9.83309       | 121.832        | 74.3399   | 1        | -4.61014               | -2.19008               | 2.29358                | -2.36975               | -12.3956               | 1.87189                | 3.10337                | 2.9329                 |
| MAK16     | 0.021988          | -1.22897            | 1.22897              | 1 up vs 2            | 9.41486       | 233.799        | 148.998   | 1        | -9.14815               | 13.9314                | 2.60046                | -2.26453               | -7.0578                | -1.02445               | 3.73111                | 5.81027                |
| MAL2      | 0.502956          | 4.31115             | 4.31115              | 1 up vs 2            | 0.507537      | 28438          | 336188    | 1        | -264.042               | 156.832                | -46.763                | -4.97114               | -212.03                | 79.6616                | 129.826                | -505.525               |
| MAMDC2    | 0.162038          | -1.12951            | 1.12951              | 1 up vs 2            | 2.54095       | 842.86         | 1990.27   | 1        | -28.6124               | 44.1864                | -2.34489               | -2.82576               | -2.29904               | 3.56991                | 7.33929                | -2.96933               |
| MAP1B     | 0.0807027         | -6.40708            | 6.40708              | 1 up vs 2            | 4.40152       | 276.52         | 376.943   | 1        | -16.5342               | 5.72038                | 3.04571                | -7.54501               | -7.43434               | -1.76981               | 12.642                 | -11.4407               |
| MAP2      | 0.205898          | -2.98584            | 2.98584              | 1 up vs 2            | 2.0115        | 382.174        | 1139.97   | 1        | -25.4062               | 5.83102                | 2.12718                | -2.7829                | -3.89559               | 2.35887                | 23.8704                | -16.2781               |
| MAP3K2    | 0.141294          | -4.48228            | 4.48228              | 1 up vs 2            | 2.86807       | 4085.23        | 8546.31   | 1        | -13.64                 | 3.58357                | 4.34345                | -103.02                | 2.1702                 | -14.8987               | 47.0567                | 2.48628                |

| Gene ID   | p-value (1 vs. 2) | MeanRatio (1 vs. 2) | FoldChange (1 vs. 2) | FoldChange (1 vs. 2) | F(Gene Group) | SS(Gene Group) | SS(Error) | F(Error) | FoldChange (106 vs. n) | FoldChange (111 vs. n) | FoldChange (112 vs. n) | FoldChange (121 vs. n) | FoldChange (347 vs. n) | FoldChange (353 vs. n) | FoldChange (537 vs. n) | FoldChange (563 vs. n) |
|-----------|-------------------|---------------------|----------------------|----------------------|---------------|----------------|-----------|----------|------------------------|------------------------|------------------------|------------------------|------------------------|------------------------|------------------------|------------------------|
| MAPK1     | 0.0260321         | -3.08224            | 3.08224              | 1 up vs 2            | 8.6289        | 318.569        | 221.513   | 1        | -8.38525               | 2.11792                | 2.25321                | -2.65748               | -18.4823               | 2.85729                | 11.0093                | -2.27259               |
| MAPK1     | 0.0797925         | -1.5502             | 1.5502               | 1 up vs 2            | 4.43601       | 146.939        | 198.745   | 1        | -8.03778               | 3.6516                 | 2.18568                | -3.2919                | -4.814                 | -1.08102               | 14.9195                | -2.31921               |
| MAPK11    | 0.139575          | -2.99388            | 2.99388              | 1 up vs 2            | 2.89819       | 238.031        | 492.786   | 1        | -19.4189               | -2.40533               | -3.43643               | -2.13721               | -3.78216               | -1.00972               | 17.9755                | 2.98155                |
| MAPK14    | 0.120058          | -2.41438            | 2.41438              | 1 up vs 2            | 3.28082       | 822.844        | 1504.83   | 1        | -39.1628               | 11.1077                | 5.97371                | -2.63355               | -2.64354               | -2.28972               | 23.9617                | -8.07615               |
| 11-Mar    | 0.208994          | 6.52082             | 6.52082              | 1 up vs 2            | 1.98028       | 983.288        | 2979.24   | 1        | -54.9072               | -4.62892               | 10.6946                | -9.99761               | -16.2398               | -1.69045               | 14.1591                | -39.2742               |
| MARLIN1   | 0.111869          | -4.6615             | 4.6615               | 1 up vs 2            | 3.4681        | 553.035        | 956.781   | 1        | -5.37119               | 11.205                 | 3.91666                | -2.37701               | -34.6738               | -2.16485               | 11.5426                | -9.3319                |
| MAT2B     | 0.214963          | -44.467             | 44.467               | 1 up vs 2            | 1.92193       | 172780         | 539396    | 1        | -896.467               | 3.30317                | 3.0342                 | -2.29751               | 8.11082                | 11.3798                | 12.5214                | 3.14401                |
| MBD3L1    | 0.413527          | 6.71761             | 6.71761              | 1 up vs 2            | 0.771547      | 179.919        | 1399.16   | 1        | -41.0555               | 2.81653                | -2.55145               | 2.94128                | 3.58715                | -2.37755               | -8.84882               | 2.39498                |
| MCAT      | 0.0486808         | -1.36971            | 1.36971              | 1 up vs 2            | 6.08418       | 346.684        | 341.887   | 1        | -19.0005               | 9.09074                | 12.7272                | -2.02573               | -2.55257               | 2.66043                | 7.56632                | -3.35404               |
| MCTP1     | 0.0578259         | 45.1317             | 45.1317              | 1 up vs 2            | 5.47667       | 62199.3        | 68142.8   | 1        | -158.596               | -2.97511               | 2.67915                | -381.723               | -18.4655               | -5.50836               | 14.328                 | -29.159                |
| MED13     | 0.565363          | -180.419            | 180.419              | 1 up vs 2            | 0.369884      | 27.3861        | 444.239   | 1        | -2.79749               | 12.8765                | 3.13122                | -3.62707               | -4.97756               | -5.3195                | 4.24571                | -14.8286               |
| MEGF8     | 0.0122868         | -5.55941            | 5.55941              | 1 up vs 2            | 12.4992       | 171.542        | 82.3455   | 1        | -4.75258               | 2.84965                | 3.04706                | -13.3458               | -6.22199               | -1.27662               | 5.08549                | -2.41453               |
| MGC119295 | 0.197024          | -13.7201            | 13.7201              | 1 up vs 2            | 2.10487       | 10921.7        | 31132.7   | 1        | -213.22                | 29.2662                | 4.23656                | 3.5487                 | -3.73731               | -1.04566               | 2.29832                | -8.8313                |
| MGC23284  | 0.176136          | -17.503             | 17.503               | 1 up vs 2            | 2.35047       | 106.017        | 270.626   | 1        | -2.58329               | -6.4838                | 7.65992                | -2.9365                | -15.8194               | 2.35664                | 4.26435                | -5.76515               |
| MGC23284  | 0.367543          | -645.43             | 645.43               | 1 up vs 2            | 0.949228      | 1217.52        | 7695.87   | 1        | 17.4907                | 2.35921                | -9.49729               | 2.1659                 | -95.9851               | 2.19095                | 2.98406                | 2.16017                |
| MGC34829  | 0.167595          | -3.17064            | 3.17064              | 1 up vs 2            | 2.46316       | 9958.76        | 24258.5   | 1        | -15.4036               | 9.46891                | -2.79814               | -147.958               | -2.85235               | 2.62787                | 108.697                | -30.6243               |
| MGC35440  | 0.0230094         | -7.47819            | 7.47819              | 1 up vs 2            | 9.19901       | 630.771        | 411.417   | 1        | -11.5106               | 7.84071                | -2.6771                | -6.48213               | -30.5417               | 1.6399                 | 6.08843                | -2.07505               |
| MGC39606  | 0.159549          | 32.6656             | 32.6656              | 1 up vs 2            | 2.577         | 2121.95        | 4940.5    | 1        | -90.107                | -2.67526               | -13.0425               | -2.81681               | -11.1858               | 1.67815                | 11.0192                | -2.29148               |
| MGC40489  | 0.0500236         | -1.21684            | 1.21684              | 1 up vs 2            | 5.98568       | 158.387        | 158.766   | 1        | -3.50751               | 13.438                 | 2.42789                | -9.5703                | -2.05706               | -1.79559               | 2.5991                 | 4.06041                |
| MGC4677   | 0.217934          | -27.9614            | 27.9614              | 1 up vs 2            | 1.98375       | 8656.75        | 27427.3   | 1        | 6.01                   | 2.43275                | -3.09422               | -200.63                | -2.18556               | 3.69366                | 5.99334                | 2.70527                |
| MIR124-2  | 0.903529          | 1.11232             | 1.11232              | 1 up vs 2            | 0.0159822     | 0.370096       | 138.941   | 1        | -6.43778               | -4.6467                | -2.00618               | -4.52295               | -2.23903               | -11.4768               | 4.15802                | -5.80654               |
| MIR1302-3 | 0.186456          | -8.8772             | 8.8772               | 1 up vs 2            | 2.22423       | 17.7987        | 48.0133   | 1        | -2.81096               | 3.5609                 | 2.11591                | -2.31048               | -3.18581               | 2.73506                | -3.42486               | -3.42735               |
| MIR380    | 0.903303          | 1.18889             | 1.18889              | 1 up vs 2            | 0.0160575     | 0.210796       | 78.7654   | 1        | -2.88075               | 2.15823                | 3.00365                | 6.40647                | 2.80533                | -3.30773               | 2.67395                | 4.34716                |
| MIR548F5  | 0.166358          | -16.2748            | 16.2748              | 1 up vs 2            | 2.48017       | 6052.41        | 16441.9   | 1        | -3.45822               | 2.82709                | 3.45813                | -4.81827               | -152.302               | 5.33855                | 2.29754                | 2.52319                |
| MIRLET7D  | 0.174799          | -13.9972            | 13.9972              | 1 up vs 2            | 2.3676        | 8094.69        | 20513.6   | 1        | -4.89144               | 24.2158                | 2.1526                 | -176.344               | -2.73648               | -10.1976               | 7.93573                | -2.2007                |
| MXK       | 0.429743          | 2.41551             | 2.41551              | 1 up vs 2            | 0.716541      | 70.1222        | 587.172   | 1        | -7.90284               | -2.14116               | -19.6535               | -7.95416               | -15.4502               | 8.38571                | 4.50765                | -12.7002               |
| MMP14     | 0.240361          | 21.7666             | 21.7666              | 1 up vs 2            | 1.69767       | 135485         | 478840    | 1        | 3.63925                | 2.57581                | 3.08097                | -3.46275               | 845.086                | -3.75477               | 60.0047                | 2.81485                |
| MMP17     | 0.134702          | -2.26472            | 2.26472              | 1 up vs 2            | 2.98645       | 17279.4        | 34715.7   | 1        | 150.195                | 4.99636                | 15.3903                | 39.7907                | 9.7951                 | 1.8698                 | -2.44555               | -166.835               |
| MMP28     | 0.243903          | -3.67606            | 3.67606              | 1 up vs 2            | 1.66913       | 74.1954        | 266.708   | 1        | -2.69535               | -2.11242               | -9.50798               | -8.47152               | -3.66895               | 3.36376                | 11.8623                | 3.12067                |
| MMP28     | 0.401955          | -11.3261            | 11.3261              | 1 up vs 2            | 0.813081      | 179.565        | 1325.07   | 1        | -7.57598               | -3.09006               | 6.22418                | -10.8969               | -8.50363               | 19.2906                | 9.89884                | -28.3539               |
| MN1       | 0.00950466        | -2.47281            | 2.47281              | 1 up vs 2            | 14.0659       | 107.236        | 45.7429   | 1        | -8.03168               | 3.03864                | 3.31049                | -2.07219               | -6.05089               | 3.00941                | 3.97512                | -2.44539               |
| MORF4L1   | 0.0935808         | -1.07658            | 1.07658              | 1 up vs 2            | 3.96425       | 758.489        | 1147.99   | 1        | -29.6031               | 9.33642                | 30.3366                | -4.1555                | 2.47666                | 1.15989                | 5.5035                 | 2.09139                |
| MRPL13    | 0.00664301        | -1.20275            | 1.20275              | 1 up vs 2            | 16.4917       | 151.856        | 55.2483   | 1        | -7.41696               | 9.25228                | 2.07711                | -2.90959               | -4.41514               | 1.2193                 | 5.63216                | 2.2469                 |
| MRPL15    | 0.00129992        | -1.68295            | 1.68295              | 1 up vs 2            | 32.1027       | 206.379        | 38.5722   | 1        | -8.32409               | 5.16204                | 3.21865                | -2.35064               | -9.06822               | 1.79955                | 6.05481                | 3.31683                |
| MRPL30    | 0.163178          | -1.17543            | 1.17543              | 1 up vs 2            | 2.52468       | 229.001        | 544.23    | 1        | -13.8746               | 15.3631                | 14.8118                | -6.21403               | 2.17469                | 1.02312                | 3.06459                | -8.86207               |
| MS4A13    | 0.219676          | -3570.66            | 3570.66              | 1 up vs 2            | 1.87748       | 1.83E+07       | 5.84E+07  | 1        | -8.46692               | -4.8967                | 10.8606                | 9361.25                | 5.33422                | -2.70697               | -4.5094                |                        |
| MTCH2     | 0.00342652        | -1.1071             | 1.1071               | 1 up vs 2            | 21.8218       | 93.1123        | 25.6017   | 1        | -5.40579               | 2.94111                | 2.67426                | -2.24757               | -3.4544                | 1.04465                | 7.14432                | 2.91762                |
| MTERFD3   | 0.230042          | -1.3209             | 1.3209               | 1 up vs 2            | 1.78442       | 139.677        | 469.655   | 1        | -9.52018               | 14.8771                | 7.7442                 | -3.076                 | -2.14041               | -1.04406               | 8.98874                | -11.9719               |
| MXRA5     | 0.0166588         | -1.31001            | 1.31001              | 1 up vs 2            | 10.8098       | 1364.07        | 757.128   | 1        | -7.04134               | 29.078                 | 17.3814                | -27.4382               | -11.4085               | 2.32186                | 2.67821                | 6.92193                |
| MYCN      | 0.163365          | -4.75695            | 4.75695              | 1 up vs 2            | 2.52203       | 3386.31        | 8056.15   | 1        | -105.171               | 29.4928                | 2.27981                | 2.1112                 | -2.28677               | 2.15364                | 7.54064                | -4.55722               |
| MYCN      | 0.170559          | -6.36417            | 6.36417              | 1 up vs 2            | 2.42315       | 1796.7         | 4448.83   | 1        | -80.2956               | 9.76943                | 2.40202                | 2.90207                | -2.86228               | 2.019                  | 10.1806                | -3.35345               |
| MYLK4     | 0.0400017         | -42.7609            | 42.7609              | 1 up vs 2            | 6.82364       | 5810.11        | 5108.8    | 1        | -43.1294               | 2.22945                | -2.23554               | -10.872                | -109.181               | 2.3453                 | 7.95485                | -3.9338                |
| MYO19     | 0.119384          | -4.36006            | 4.36006              | 1 up vs 2            | 3.29556       | 6328.54        | 11521.9   | 1        | -15.0224               | 42.7906                | -2.21826               | 2.08284                | -128.834               | -1.18299               | 11.5303                | 3.27436                |
| MYT1L     | 0.0524063         | -241.069            | 241.069              | 1 up vs 2            | 5.81941       | 15283.5        | 15757.8   | 1        | -189.12                | -8.0163                | -6.1176                | -58.3138               | -22.2991               | 9.45888                | 11.4474                | -4.90754               |
| NAE1      | 0.055425          | -1.58818            | 1.58818              | 1 up vs 2            | 5.62289       | 311.59         | 332.487   | 1        | -6.01666               | 6.14848                | -2.28094               | -12.7013               | -5.0131                | -1.03684               | 19.2189                | 2.8543                 |
| NAIP      | 0.376229          | 3.95835             | 3.95835              | 1 up vs 2            | 0.912946      | 24.9876        | 164.222   | 1        | -5.53712               | 3.21601                | 3.2138                 | -11.5186               | 2.40201                | -4.32822               | -4.72356               | -3.54799               |
| NANOS1    | 0.0382403         | -2.81391            | 2.81391              | 1 up vs 2            | 7.00051       | 487.622        | 417.932   | 1        | -12.1062               | 2.96011                | 2.16321                | -18.6452               | -4.94319               | -1.5345                | 19.8114                | -2.2585                |
| NBEA      | 0.0183085         | -6.5702             | 6.5702               | 1 up vs 2            | 10.3204       | 475.622        | 276.515   | 1        | -6.41222               | 2.1977                 | -4.69582               | -9.64631               | -25.4104               | 2.06675                | 6.14694                | 4.80388                |
| NBPF10    | 0.590789          | -4.15094            | 4.15094              | 1 up vs 2            | 0.32236       | 73.1616        | 1361.74   | 1        | -6.05395               | 3.35798                | 2.29589                | -9.82898               | 30.9845                | -1.39655               | 6.67287                | -16.9937               |
| NBPF8     | 0.0846342         | -1.87607            | 1.87607              | 1 up vs 2            | 4.25843       | 73.1644        | 103.086   | 1        | -5.78808               | 3.17756                | 2.68848                | -2.62613               | -3.80997               | 1.49785                | 8.67218                | -5.17631               |
| NCOA3     | 0.203503          | -3.69444            | 3.69444              | 1 up vs 2            | 2.03613       | 27.6746        | 81.5506   | 1        | -3.67913               | 3.10419                | 2.15231                | -2.54012               | -2.85114               | 1.2461                 | 4.51651                | -6.9272                |
| NCOR2     | 0.265261          | -2.01399            | 2.01399              | 1 up vs 2            | 1.50918       | 2036.81        | 8097.7    | 1        | -33.4765               | 5.92923                | -10.8107               | -18.8194               | -13.7752               | -24.3348               | 87.8971                | -4.00399               |

| Gene ID | p-value (1 vs. 2) | MeanRatio (1 vs. 2) | FoldChange (1 vs. 2) | FoldChange (1 vs. 2) | F(Gene Group) | SS(Gene Group) | SS(Error) | F(Error) | FoldChange (106 vs. n) | FoldChange (111 vs. n) | FoldChange (112 vs. n) | FoldChange (121 vs. n) | FoldChange (347 vs. n) | FoldChange (353 vs. n) | FoldChange (537 vs. n) | FoldChange (563 vs. n) |
|---------|-------------------|---------------------|----------------------|----------------------|---------------|----------------|-----------|----------|------------------------|------------------------|------------------------|------------------------|------------------------|------------------------|------------------------|------------------------|
| NEFL    | 0.773437          | 2.00357             | 2.00357              | 1 up vs 2            | 0.0907134     | 113.705        | 7520.73   | 1        | -40.0964               | -19.7529               | 2.32556                | -2.55491               | -3.98954               | -33.3756               | 57.6511                | -45.6462               |
| NEK10   | 0.84074           | 1.99907             | 1.99907              | 1 up vs 2            | 0.0440306     | 0.694738       | 94.6712   | 1        | -3.66423               | -2.74046               | -2.53995               | -3.8158                | 3.82608                | -4.56064               | 3.90093                | 2.89375                |
| NEURL   | 0.0773902         | -9.20928            | 9.20928              | 1 up vs 2            | 4.52969       | 557.499        | 738.46    | 1        | -29.8845               | -6.11559               | 2.20824                | -7.50801               | -9.27054               | -2.64207               | 19.3603                | -4.36595               |
| NFATC1  | 0.594546          | -1.00741            | 1.00741              | 1 up vs 2            | 0.315713      | 55.3738        | 1052.36   | 1        | -3.99456               | 2.49477                | -17.981                | 2.80711                | -6.99426               | 17.2029                | 19.0098                | -7.19065               |
| NFATC3  | 0.239062          | -1.19796            | 1.19796              | 1 up vs 2            | 1.70829       | 159.993        | 561.94    | 1        | -7.99786               | 24.6057                | -3.65535               | -4.15593               | -2.95025               | -1.30335               | 3.41478                | -2.04822               |
| NGB     | 0.123286          | -37.6025            | 37.6025              | 1 up vs 2            | 3.21178       | 32911.5        | 61482.7   | 1        | -328.246               | -3.24587               | -10.4442               | -18.3892               | -40.5294               | 2.14179                | 39.3001                | -10.5914               |
| NLGN4X  | 0.0631172         | -1.09712            | 1.09712              | 1 up vs 2            | 5.18166       | 291.793        | 337.876   | 1        | -12.9948               | 8.65891                | 2.62535                | -2.82028               | -3.76386               | 1.44686                | 19.0637                | -2.05189               |
| NLRC4   | 0.536267          | -1.8973             | 1.8973               | 1 up vs 2            | 0.430089      | 9.11828        | 127.205   | 1        | -3.74029               | -5.31759               | 5.93335                | -3.28904               | 2.69702                | -3.90447               | 3.1082                 | 3.98619                |
| NLRP3   | 0.0529694         | -1.03016            | 1.03016              | 1 up vs 2            | 5.7816        | 38.0637        | 39.5015   | 1        | -2.00747               | 2.06717                | 4.35885                | -2.03251               | -2.81886               | 2.86092                | 4.81691                | -3.00714               |
| NMD3    | 0.0085369         | -1.64762            | 1.64762              | 1 up vs 2            | 14.7626       | 174.629        | 70.9748   | 1        | -12.0699               | 4.88371                | 2.72986                | -2.09351               | -3.85348               | 1.67271                | 6.29177                | 2.64713                |
| NME6    | 0.000619426       | -1.00528            | 1.00528              | 1 up vs 2            | 42.5493       | 64.4121        | 9.08294   | 1        | -2.12999               | 2.5477                 | 2.4193                 | -3.0299                | -3.65498               | 1.77719                | 5.37582                | 2.4943                 |
| NNAT    | 0.31409           | -2.06225            | 2.06225              | 1 up vs 2            | 1.20676       | 150.793        | 7497.43   | 1        | -58.2117               | -5.5632                | -7.01178               | 3.75412                | -2.83681               | -8.84518               | 73.5993                | -5.87494               |
| NOC3L   | 0.0884345         | -1.00026            | 1.00026              | 1 up vs 2            | 4.12849       | 242.392        | 352.272   | 1        | -10.0103               | 3.64319                | 2.06727                | -2.93079               | -4.11603               | -1.21672               | 2.48271                | 21.4448                |
| NOM1    | 0.399225          | 3.14736             | 3.14736              | 1 up vs 2            | 0.823174      | 6.11634        | 44.5811   | 1        | -2.02634               | 2.91724                | -4.05102               | -3.59753               | -2.31773               | -3.12411               | -2.4272                | 2.47966                |
| NOP2    | 0.0910341         | -1.43907            | 1.43907              | 1 up vs 2            | 4.04394       | 128.675        | 190.916   | 1        | -8.57484               | 7.20646                | 7.03961                | -8.66879               | 2.58053                | -1.11942               | 7.16007                | -3.30454               |
| NPEPPS  | 0.0653248         | -2.21352            | 2.21352              | 1 up vs 2            | 5.06833       | 317.269        | 375.59    | 1        | -19.4848               | 8.6987                 | 2.80847                | -2.54402               | -4.85162               | -1.8842                | 13.8301                | -3.21345               |
| NPTN    | 0.210256          | 15.7189             | 15.7189              | 1 up vs 2            | 1.96775       | 6160.72        | 18785     | 1        | -172.111               | 2.75565                | 2.86549                | -8.64732               | -2.88837               | -3.86875               | -2.19825               | -19.0261               |
| NPVF    | 0.849721          | -2.13954            | 2.13954              | 1 up vs 2            | 0.0391309     | 1.06316        | 163.016   | 1        | -7.91653               | -4.91288               | 2.33388                | 7.35673                | 2.09928                | 1.01859                | 2.65116                | -2.28998               |
| NPY     | 0.548295          | 1.79144             | 1.79144              | 1 up vs 2            | 0.404409      | 44368.8        | 658276    | 1        | -212.235               | -2.38263               | -2.15652               | -370.494               | -461.853               | -56.4713               | -9.7206                | -901.094               |
| NR1I2   | 0.274907          | 4.38739             | 4.38739              | 1 up vs 2            | 1.44307       | 111.512        | 663.645   | 1        | 26.2658                | 2.32578                | 2.12397                | 7.60263                | -3.90288               | 2.32296                | 2.26957                | 2.34092                |
| NR2E1   | 0.0923516         | 11.293              | 11.293               | 1 up vs 2            | 4.00234       | 36745.5        | 55086.1   | 1        | -46.7623               | -15.3696               | -3.07672               | -342.63                | -71.3841               | -3.36314               | -3.33637               | -42.8576               |
| NR4A3   | 0.219874          | -4849.62            | 4849.62              | 1 up vs 2            | 1.87565       | 3.56E+08       | 1.14E+09  | 1        | -3.0025                | 4.12959                | 4.30645                | 3.90127                | -41308.5               | 3.6455                 | 8.60771                | -6.49309               |
| NRBF2   | 0.000127074       | -2.08064            | 2.08064              | 1 up vs 2            | 75.7572       | 144.511        | 11.4453   | 1        | -7.81522               | 3.44566                | 2.57811                | -4.25171               | -5.72108               | 1.46945                | 4.41202                | 2.34361                |
| NRCAM   | 0.00692502        | -1.2037             | 1.2037               | 1 up vs 2            | 16.1949       | 165.413        | 61.2835   | 1        | -7.01748               | 2.33954                | 2.99857                | -3.18112               | -5.19255               | 2.47234                | 10.8148                | 2.68571                |
| NRF1    | 0.599689          | 22.7889             | 22.7889              | 1 up vs 2            | 0.306766      | 5.03633        | 98.5051   | 1        | 5.80762                | 4.37455                | -2.04699               | 2.00643                | -2.67165               | 4.3133                 | -2.46114               | -3.80363               |
| NRGN    | 0.556053          | 1.96268             | 1.96268              | 1 up vs 2            | 0.388443      | 9407.89        | 145317    | 1        | -329.31                | -2.31016               | -9.18579               | -31.7691               | -72.1669               | -7.04201               | -2.74576               | -346.62                |
| NRP1    | 0.0586464         | -1.20822            | 1.20822              | 1 up vs 2            | 5.42857       | 1165.18        | 1287.83   | 1        | -24.8169               | 2.60865                | 10.3861                | -12.7224               | -3.37929               | 1.16352                | 39.6348                | 2.6515                 |
| NRXN3   | 0.117518          | -5.56948            | 5.56948              | 1 up vs 2            | 3.33698       | 1370.64        | 2464.46   | 1        | -60.0792               | 20.5299                | 3.47017                | -6.05863               | -2.62702               | -1.95496               | 3.3784                 | -4.84563               |
| NTSR2   | 0.270016          | 7.09927             | 7.09927              | 1 up vs 2            | 1.47615       | 3657.04        | 14864.5   | 1        | -4.33176               | -36.6679               | -3.40681               | -2.76847               | -147.113               | 3.33166                | 3.25861                | -2.71959               |
| NUDT7   | 0.000699097       | -1.00965            | 1.00965              | 1 up vs 2            | 40.6627       | 87.5786        | 12.9227   | 1        | -3.6597                | 2.0875                 | 2.65877                | -3.01106               | -3.63002               | 2.20429                | 6.37955                | 3.67376                |
| NUF2    | 0.234429          | 31.6204             | 31.6204              | 1 up vs 2            | 1.74686       | 7.33E+06       | 2.52E+07  | 1        | -4.46712               | 306.129                | 6.17417                | 6131.92                | -2.91997               | 3.19129                | 4.6052                 | 2.71549                |
| NXNL2   | 0.474465          | 1.9319              | 1.9319               | 1 up vs 2            | 0.581946      | 15.8713        | 163.637   | 1        | -2.17576               | 3.46154                | 2.15314                | 6.66294                | 13.6071                | -1.26496               | 3.95565                | 7.30469                |
| OCIAD2  | 0.0213239         | -4.61606            | 4.61606              | 1 up vs 2            | 9.56259       | 9873.7         | 6195.2    | 1        | -49.8344               | 5.94546                | 9.06474                | -10.1767               | -118.926               | 11.906                 | 17.6507                | 20.0398                |
| ODZ2    | 0.554367          | 7.29621             | 7.29621              | 1 up vs 2            | 0.391875      | 16.6454        | 254.857   | 1        | -9.41841               | 8.19224                | 2.34839                | -3.14714               | 2.20732                | -7.39068               | 2.02709                | -7.54316               |
| OGG1    | 0.092647          | -1.36533            | 1.36533              | 1 up vs 2            | 3.99312       | 144.45         | 217.048   | 1        | -6.45231               | 9.73828                | 3.22126                | -6.03395               | -2.71308               | -3.17019               | 12.251                 | -3.48641               |
| OIT3    | 0.251787          | -9.12165            | 9.12165              | 1 up vs 2            | 1.60776       | 1566.87        | 5847.39   | 1        | 2.79444                | 4.48218                | 5.53306                | -88.0685               | 7.11875                | -4.13976               | 6.01191                | 2.3928                 |
| OPLAH   | 0.197578          | 14.0791             | 14.0791              | 1 up vs 2            | 2.09887       | 1148.25        | 3282.48   | 1        | -2.61296               | -2.12719               | -11.2531               | -5.01128               | -72.2921               | -3.50717               | 3.96263                | 3.46443                |
| OPN3    | 0.174469          | -8.34797            | 8.34797              | 1 up vs 2            | 2.37185       | 87241.9        | 220693    | 1        | -570.84                | 16.777                 | 73.2328                | 2.70264                | -9.75463               | 3.30589                | 48.552                 | -26.492                |
| OR13J1  | 0.105462          | -1.52776            | 1.52776              | 1 up vs 2            | 3.62836       | 679.862        | 1124.25   | 1        | -5.30395               | 3.00244                | -2.94629               | -26.7792               | -2.44314               | 1.3065                 | 31.8584                | 4.44454                |
| OR1K1   | 0.608356          | 2.18787             | 2.18787              | 1 up vs 2            | 0.292073      | 14.5716        | 299.341   | 1        | 2.7386                 | -4.45845               | -2.2658                | 4.73334                | 7.93183                | 16.2002                | 4.53101                | -2.27273               |
| OR2H1   | 0.340701          | 6.44108             | 6.44108              | 1 up vs 2            | 1.07059       | 1077.53        | 6038.85   | 1        | -4.08118               | 2.16952                | 9.8829                 | 91.6173                | -2.40116               | 3.08068                | 3.2328                 | 3.66325                |
| OR2M1P  | 0.261958          | -2.65235            | 2.65235              | 1 up vs 2            | 1.53265       | 513.982        | 2012.13   | 1        | -2.1485                | -7.30807               | 41.1653                | -9.26739               | -24.6547               | -7.48021               | -6.29357               | 2.58233                |
| OR2W3   | 0.330672          | 156.964             | 156.964              | 1 up vs 2            | 1.1199        | 23.993         | 128.545   | 1        | -5.33006               | 2.19708                | 2.07703                | -2.80418               | -2.66614               | 2.43453                | 3.13442                | -9.95774               |
| OR4K2   | 0.0226992         | 1.30279             | 1.30279              | 1 up vs 2            | 9.26318       | 473.815        | 306.902   | 1        | -8.1617                | 2.57206                | 20.978                 | -4.28891               | -14.5296               | 3.47507                | 2.18434                | 5.30639                |
| OR52K1  | 0.692585          | 2.04008             | 2.04008              | 1 up vs 2            | 0.17221       | 31.1011        | 1083.6    | 1        | 3.85728                | -19.8929               | 2.73017                | -30.1363               | 2.31333                | -2.32624               | -2.75574               | 2.66562                |
| OR5J2   | 0.158612          | -5.94024            | 5.94024              | 1 up vs 2            | 2.5908        | 285.203        | 660.5     | 1        | 2.88284                | 8.41656                | 3.562                  | -28.7932               | -5.75814               | -1.58963               | 4.39059                | -5.89421               |
| OR5M9   | 0.731353          | 3.36082             | 3.36082              | 1 up vs 2            | 0.129425      | 10.5611        | 489.6     | 1        | -3.94734               | 14.4602                | -3.15485               | 8.35424                | 5.72887                | 1.29271                | -12.7668               | 5.19518                |
| OR7G3   | 0.385918          | -33.1734            | 33.1734              | 1 up vs 2            | 0.874051      | 552.79         | 3794.67   | 1        | -5.37017               | -2.64884               | -6.21068               | 66.4595                | -11.0856               | 1.06495                | 2.89173                | 2.3906                 |
| OSBPL8  | 0.0160098         | -1.58642            | 1.58642              | 1 up vs 2            | 11.0206       | 91.8319        | 49.9966   | 1        | -3.77307               | 4.28097                | 2.11326                | -4.2521                | -4.85247               | -2.41387               | 7.20442                | 2.34427                |
| OVCH1   | 0.92602           | 1.1128              | 1.1128               | 1 up vs 2            | 0.00937473    | 0.485979       | 311.036   | 1        | 2.70295                | 3.27517                | 2.80367                | -5.8339                | 18.1989                | 7.43603                | 3.759                  | 5.29385                |
| P2RY1   | 0.175788          | -35.4592            | 35.4592              | 1 up vs 2            | 2.35491       | 68319.2        | 174068    | 1        | -525.938               | 5.51589                | 2.3855                 | -4.36936               | -26.6394               | 1.30116                | 14.8162                | 2.15905                |
| P2RY5   | 0.0112758         | -1.73962            | 1.73962              | 1 up vs 2            | 13.0081       | 118.842        | 54.816    | 1        | -3.78037               | 7.25417                | 3.79729                | -7.53247               | -3.85314               | -2.09551               | 3.44449                | 2.12951                |

| Gene ID  | p-value (1 vs. 2) | MeanRatio (1 vs. 2) | FoldChange (1 vs. 2) | FoldChange (1 vs. 2) | F(Gene Group) | SS(Gene Group) | SS(Error) | F(Error) | FoldChange (106 vs. n) | FoldChange (111 vs. n) | FoldChange (112 vs. n) | FoldChange (121 vs. n) | FoldChange (347 vs. n) | FoldChange (353 vs. n) | FoldChange (537 vs. n) | FoldChange (563 vs. n) |
|----------|-------------------|---------------------|----------------------|----------------------|---------------|----------------|-----------|----------|------------------------|------------------------|------------------------|------------------------|------------------------|------------------------|------------------------|------------------------|
| P704P    | 0.0891705         | -2.73923            | 2.73923              | 1 up vs 2            | 4.10421       | 198.849        | 290.699   | 1        | -17.6654               | 11.1366                | 3.4294                 | -2.33152               | -2.63535               | -1.18036               | 4.53204                | -4.14722               |
| PAIP1    | 0.0634528         | -1.84641            | 1.84641              | 1 up vs 2            | 5.16409       | 369.989        | 429.879   | 1        | -18.2781               | 6.28065                | 16.134                 | -3.08953               | -5.96905               | 2.44519                | 7.51508                | -7.69943               |
| PAK6     | 0.169239          | -3.27326            | 3.27326              | 1 up vs 2            | 2.44085       | 840.762        | 2066.73   | 1        | -30.3162               | -4.40165               | 2.37177                | -5.87812               | -12.4664               | 4.24125                | 39.32                  | -16.7545               |
| PARK2    | 0.120571          | 48.2423             | 48.2423              | 1 up vs 2            | 3.26967       | 835.099        | 1532.45   | 1        | -50.9062               | -2.28027               | 2.02084                | -2.07319               | -11.6733               | 2.24179                | 7.15393                | -11.3699               |
| PARM1    | 0.0133584         | -3.77072            | 3.77072              | 1 up vs 2            | 12.0176       | 2413.19        | 1204.83   | 1        | -27.0608               | 6.82529                | 4.36515                | -8.58716               | -49.4182               | 6.23485                | 23.1916                | -3.01748               |
| PCDH24   | 0.0644299         | -4.21011            | 4.21011              | 1 up vs 2            | 5.11363       | 1053.71        | 1236.35   | 1        | -3.31713               | 2.21767                | 2.1669                 | -7.52398               | -46.627                | -1.03506               | 9.98105                | 9.4195                 |
| PCDH8    | 0.225255          | -1.34883            | 1.34883              | 1 up vs 2            | 1.82663       | 4016.95        | 13194.6   | 1        | -52.0447               | 9.1845                 | 112.512                | -21.5228               | -6.17226               | -3.26891               | 13.4364                | -33.3347               |
| PCDHA10  | 0.226769          | -1.1718             | 1.1718               | 1 up vs 2            | 1.81314       | 136.171        | 450.615   | 1        | 2.81792                | 20.1025                | -2.56215               | -6.30615               | -10.306                | 2.95876                | -3.38001               | 2.50059                |
| PCDHA3   | 0.119444          | -1.54545            | 1.54545              | 1 up vs 2            | 3.29425       | 1484.66        | 2704.1    | 1        | -39.1166               | 3.82317                | 5.53922                | -4.00596               | -8.13101               | 2.88111                | 49.7915                | -6.76122               |
| PCDHA3   | 0.874864          | 1.73284             | 1.73284              | 1 up vs 2            | 0.0270059     | 12.3581        | 2745.65   | 1        | -4.41126               | 4.19478                | 15.6675                | 5.17014                | -18.9704               | 1.34303                | 7.99762                | -46.719                |
| PCDHAC1  | 0.204403          | -41.8821            | 41.8821              | 1 up vs 2            | 2.02683       | 328990         | 973904    | 1        | -2.70146               | 10.6637                | 2.36418                | -1214.77               | -9.86673               | 10.8733                | 21.9999                | 2.93988                |
| PCDHB3   | 0.15556           | -8.67111            | 8.67111              | 1 up vs 2            | 2.63649       | 11211.7        | 25515.2   | 1        | -6.42987               | 7.7895                 | 2.94412                | -2.62236               | -198.944               | -1.65782               | 9.16256                | 21.7404                |
| PCDHGA5  | 0.0517633         | -2.44301            | 2.44301              | 1 up vs 2            | 5.86326       | 82.1619        | 84.0781   | 1        | -5.03725               | 7.85859                | -2.19137               | -5.76059               | -3.2932                | 1.23809                | 5.06771                | -2.35986               |
| PCSK1    | 0.0468694         | -5.61086            | 5.61086              | 1 up vs 2            | 6.22304       | 40557.5        | 39103.9   | 1        | -80.9651               | 11.5929                | 36.8228                | -16.2231               | -277.291               | -2.5452                | 54.836                 | 10.5299                |
| PDE4DIP  | 0.773637          | -4.30726            | 4.30726              | 1 up vs 2            | 0.0905476     | 3.29227        | 218.158   | 1        | -4.77446               | 2.93576                | 6.14642                | 7.51742                | -5.96922               | 2.17533                | -6.7045                | -3.30463               |
| PDE5A    | 0.499041          | -2.5678             | 2.5678               | 1 up vs 2            | 0.517291      | 36.0174        | 417.762   | 1        | -15.0509               | 2.70487                | 4.82194                | -6.08509               | 11.6728                | -1.29121               | 3.35233                | -3.44571               |
| PDGFB    | 0.147013          | -2.13027            | 2.13027              | 1 up vs 2            | 2.77146       | 51.5398        | 111.58    | 1        | -3.367                 | 3.43527                | 2.1982                 | -3.33782               | -3.99915               | -2.55471               | 9.28657                | -3.99083               |
| PDXDC2   | 0.57234           | 1.98876             | 1.98876              | 1 up vs 2            | 0.356391      | 152.201        | 2562.37   | 1        | 9.36687                | -2.11777               | -31.8482               | -15.2759               | -48.456                | 2.3274                 | -16.2481               | 2.32651                |
| PDZD2    | 0.00998497        | 26.6387             | 26.6387              | 1 up vs 2            | 13.7544       | 175.688        | 76.6389   | 1        | -10.0997               | -2.0369                | -2.79746               | -5.72159               | -14.351                | 1.75438                | 4.08555                | -2.89332               |
| PEX10    | 0.242048          | -1.65193            | 1.65193              | 1 up vs 2            | 1.684         | 115.638        | 412.012   | 1        | -3.75583               | 17.8717                | -7.27586               | -2.44781               | -8.47212               | -1.20266               | 7.57203                | -2.15857               |
| PHACS    | 0.206951          | -2.05153            | 2.05153              | 1 up vs 2            | 2.00081       | 872.559        | 2616.62   | 1        | -38.0263               | -4.32284               | -7.57292               | -2.04607               | -3.43656               | -4.74823               | 43.104                 | 8.8867                 |
| PHF20L1  | 0.371127          | 27.7348             | 27.7348              | 1 up vs 2            | 0.934089      | 59.8224        | 384.261   | 1        | -4.99907               | 8.00773                | -17.0056               | -7.88713               | -4.69306               | 1.05316                | 3.6938                 | 3.19452                |
| PHKB     | 0.012533          | -11.5498            | 11.5498              | 1 up vs 2            | 12.3837       | 336.226        | 162.904   | 1        | -16.9661               | 3.12231                | 2.36258                | -3.88268               | -16.1233               | -1.0492                | 5.16785                | -4.26837               |
| PIKFYVE  | 0.0628913         | -1.21215            | 1.21215              | 1 up vs 2            | 5.19356       | 58.7508        | 67.735    | 1        | -3.67382               | 7.12701                | 2.99225                | -3.24987               | -2.27805               | 1.2603                 | 4.92101                | -3.64852               |
| PIP5K1B  | 0.0100541         | 4.20715             | 4.20715              | 1 up vs 2            | 13.7113       | 141.419        | 61.8844   | 1        | -13.6658               | -3.69827               | -3.0921                | -12.607                | -7.90491               | -2.95604               | 2.60742                | -6.40054               |
| PLDN     | 0.0304991         | -1.827              | 1.827                | 1 up vs 2            | 7.93198       | 157.843        | 119.397   | 1        | -10.3534               | 6.44346                | 2.11542                | -4.09659               | -3.33876               | 1.4772                 | 9.22273                | -3.03116               |
| PMAIP1   | 0.251612          | 27.38               | 27.38                | 1 up vs 2            | 1.60909       | 36842.8        | 137380    | 1        | -17.8398               | 5.42299                | -7.81284               | 447.495                | 6.81603                | 5.37202                | 13.9664                | 9.62013                |
| PMCHL2   | 0.303334          | -1.53764            | 1.53764              | 1 up vs 2            | 1.26698       | 53.9212        | 255.354   | 1        | -3.22248               | -3.77906               | 2.13407                | -2.26576               | -4.25997               | -1.32259               | 15.8092                | -2.27541               |
| PMS2     | 0.0554824         | -2.72968            | 2.72968              | 1 up vs 2            | 5.6193        | 608.98         | 650.238   | 1        | -26.8057               | 16.7955                | 5.37683                | -2.87871               | -9.88526               | -5.65539               | 10.6097                | -2.96654               |
| PMS2L11  | 0.0435289         | -2.25525            | 2.25525              | 1 up vs 2            | 6.49917       | 345.952        | 319.381   | 1        | -8.06692               | 15.5376                | 7.51563                | -3.60919               | -16.5557               | -2.9064                | 2.93925                | -2.22228               |
| PNMA6A   | 0.127406          | -1.54548            | 1.54548              | 1 up vs 2            | 3.12724       | 262.181        | 503.027   | 1        | -14.6333               | -2.70303               | 2.62522                | 2.11218                | -9.01734               | 6.19838                | 20.1015                | -2.99471               |
| PNPT1    | 0.0740559         | 62.1649             | 62.1649              | 1 up vs 2            | 4.66649       | 186.752        | 240.119   | 1        | -5.3293                | 3.21264                | 2.58752                | -3.32078               | -21.7795               | -1.30712               | 2.79625                | -2.93008               |
| POFUT1   | 0.185638          | -4.09489            | 4.09489              | 1 up vs 2            | 2.23387       | 620.67         | 1667.07   | 1        | -45.117                | 3.81137                | -5.24396               | -4.90131               | 6.14924                | -1.17594               | 13.5605                | 6.90324                |
| POLR2J   | 0.0123816         | -2.16391            | 2.16391              | 1 up vs 2            | 12.4544       | 225.283        | 108.532   | 1        | -4.31219               | 2.11778                | 4.28722                | -2.62725               | -15.5511               | 1.54614                | 4.11432                | 5.25698                |
| PPARA    | 0.250849          | 39.4471             | 39.4471              | 1 up vs 2            | 1.61491       | 317.871        | 1181.01   | 1        | -40.3944               | 3.30864                | -3.53597               | 2.59871                | -2.28151               | 1.0617                 | 3.50802                | -6.03568               |
| PPEF1    | 0.08029           | -18.3042            | 18.3042              | 1 up vs 2            | 4.41709       | 1607.48        | 2183.53   | 1        | -63.3884               | -2.98652               | 2.66437                | -5.85571               | -14.0457               | 4.82263                | 11.8795                | -8.79613               |
| PPIE     | 0.51232           | 2.41046             | 2.41046              | 1 up vs 2            | 0.484782      | 51.1527        | 633.101   | 1        | -12.9226               | -24.3945               | 2.60582                | -2.48511               | -11.3713               | 2.67033                | -3.50908               | 4.11156                |
| PPL      | 0.0958854         | -18.9056            | 18.9056              | 1 up vs 2            | 3.89466       | 355.351        | 547.443   | 1        | -28.3854               | -2.06005               | -2.83778               | -5.29783               | -5.54191               | -7.05482               | 10.6535                | 4.75713                |
| PPM2C    | 0.0732199         | -5.8974             | 5.8974               | 1 up vs 2            | 4.70211       | 885.553        | 1129.99   | 1        | -15.8918               | 2.76896                | 5.06749                | -4.72532               | -35.1275               | 1.04157                | 21.4457                | -14.5697               |
| PPP2R5D  | 0.0682195         | -4.55183            | 4.55183              | 1 up vs 2            | 4.92738       | 1541.44        | 1876.99   | 1        | -56.85                 | 6.56534                | 10.2047                | -8.50969               | -5.16373               | 1.3679                 | 12.7461                | -0.06167               |
| PRAMEF15 | 0.134177          | -4.80191            | 4.80191              | 1 up vs 2            | 2.99623       | 906.012        | 1814.31   | 1        | 3.60385                | 3.56389                | -3.80487               | -51.1141               | -7.06937               | 12.2194                | 2.32232                | 4.64299                |
| PRDM4    | 0.00206359        | -1.22468            | 1.22468              | 1 up vs 2            | 26.7846       | 82.1631        | 18.4053   | 1        | -4.36451               | 3.00143                | 2.21076                | -2.04418               | -4.52368               | 1.16046                | 6.17758                | 2.32762                |
| PRKCB1   | 0.0108741         | -60.4621            | 60.4621              | 1 up vs 2            | 13.2276       | 5959.31        | 2703.12   | 1        | -88.8193               | 2.95903                | 13.3272                | -19.9868               | -57.5713               | -9.39097               | 4.06348                | -6.37247               |
| PRKCD    | 0.0147423         | -2.24482            | 2.24482              | 1 up vs 2            | 11.4672       | 108.606        | 56.2259   | 1        | -3.72394               | 4.13915                | 2.58201                | -2.47929               | -9.59244               | -2.03614               | 4.68904                | 2.35343                |
| PRKCG    | 0.126546          | -8.37259            | 8.37259              | 1 up vs 2            | 3.14457       | 2950.47        | 5629.64   | 1        | -40.7621               | -3.29525               | -22.4948               | -11.0863               | -54.4597               | -1.33803               | 63.2052                | -14.9152               |
| PRM3     | 0.04094           | -1.24258            | 1.24258              | 1 up vs 2            | 6.73366       | 425.722        | 379.338   | 1        | -14.4533               | 16.4303                | 2.50159                | 4.12821                | -14.7222               | 1.07097                | 7.73688                | 5.85598                |
| PRR15    | 0.36232           | -4.14454            | 4.14454              | 1 up vs 2            | 0.971716      | 41.2723        | 254.842   | 1        | -9.64781               | 2.9873                 | -5.26147               | 2.59647                | -4.28779               | -6.06165               | 10.1324                | 2.76329                |
| PRSS3    | 0.176798          | 10.3232             | 10.3232              | 1 up vs 2            | 2.34207       | 893.393        | 2288.73   | 1        | -58.2282               | -4.79934               | 2.28341                | -3.83411               | -10.4466               | -2.14495               | 12.2352                | -19.2808               |
| PSMD9    | 0.0611533         | -7.11894            | 7.11894              | 1 up vs 2            | 5.2871        | 507.482        | 575.91    | 1        | -5.04831               | 3.3834                 | -2.05102               | -6.63467               | -31.593                | 1.79346                | 10.9082                | -3.90238               |
| PTGER4   | 0.00277449        | -1.60814            | 1.60814              | 1 up vs 2            | 23.7857       | 153.648        | 38.7582   | 1        | -4.75881               | 3.6606                 | 2.74898                | -2.26302               | -9.72287               | 1.18183                | 5.1482                 | 4.61447                |
| PTPLA    | 0.0124821         | -4.51586            | 4.51586              | 1 up vs 2            | 12.4073       | 282.125        | 136.431   | 1        | -17.4947               | 6.28802                | 3.02436                | -7.2139                | -5.41927               | -3.56441               | 3.15046                | 2.22086                |
| PTPLAD1  | 0.0563883         | -2.92846            | 2.92846              | 1 up vs 2            | 5.56321       | 54.9695        | 59.2854   | 1        | -5.4196                | 4.29299                | 2.12855                | -2.89829               | -3.79084               | -1.35601               | 5.33157                | -3.5057                |

| Gene ID  | p-value (1 vs. 2) | MeanRatio (1 vs. 2) | FoldChange (1 vs. 2) | FoldChange (1 vs. 2) | F(Gene Group) | SS(Gene Group) | SS(Error) | F(Error) | FoldChange (106 vs. n) | FoldChange (111 vs. n) | FoldChange (112 vs. n) | FoldChange (121 vs. n) | FoldChange (347 vs. n) | FoldChange (353 vs. n) | FoldChange (537 vs. n) | FoldChange (563 vs. n) |
|----------|-------------------|---------------------|----------------------|----------------------|---------------|----------------|-----------|----------|------------------------|------------------------|------------------------|------------------------|------------------------|------------------------|------------------------|------------------------|
| PTPRE    | 0.00324755        | -1.94324            | 1.94324              | 1 up vs 2            | 22.3078       | 122.192        | 32.8652   | 1        | -3.26308               | 2.79293                | 2.81881                | -9.61425               | -3.11242               | 1.36257                | 4.51459                | 2.22512                |
| PTPRE    | 0.00142947        | -2.0498             | 2.0498               | 1 up vs 2            | 30.9414       | 154.283        | 29.9179   | 1        | -3.97519               | 2.84182                | 2.89647                | -9.88952               | -4.42558               | 1.03323                | 5.08279                | 3.01728                |
| PTPRN    | 0.151029          | -19.2458            | 19.2458              | 1 up vs 2            | 2.70672       | 4753.99        | 10538.2   | 1        | -127.717               | -3.37389               | 8.02575                | -2.64759               | -13.2342               | -14.2128               | 25.6468                | -3.65033               |
| PTPRR    | 0.0577544         | 126.785             | 126.785              | 1 up vs 2            | 5.4809        | 124752         | 136567    | 1        | -186.7                 | -4.68811               | -3.4941                | -549.924               | -43.3554               | 7.09634                | 2.41348                | -1.15809               |
| PYCARD   | 0.124366          | -4.04216            | 4.04216              | 1 up vs 2            | 3.18924       | 249.796        | 469.949   | 1        | 2.13866                | 2.8717                 | 13.6656                | -18.2464               | -11.6517               | -7.21296               | 4.9641                 | -2.84265               |
| QPCT     | 0.067405          | -5.14361            | 5.14361              | 1 up vs 2            | 4.96621       | 851.107        | 1028.28   | 1        | -11.5019               | 3.13329                | 6.62307                | -38.7961               | -3.21474               | 17.1831                | -5.08454               | -4.51538               |
| RAB12    | 0.256882          | 5.74993             | 5.74993              | 1 up vs 2            | 1.56958       | 323.932        | 1238.29   | 1        | -6.31484               | 4.02763                | 2.34319                | -6.46705               | -34.9516               | -2.4148                | 7.64092                | -25.4329               |
| RAB42    | 0.112787          | -1.97719            | 1.97719              | 1 up vs 2            | 3.44617       | 693.085        | 1206.7    | 1        | -2.21652               | 17.6466                | 2.99188                | -38.8519               | 2.76339                | 1.01909                | 6.79673                | 3.83477                |
| RAB7B    | 0.134677          | -1.06329            | 1.06329              | 1 up vs 2            | 2.98691       | 1135.8         | 2281.56   | 1        | -33.1653               | 3.78111                | 48.2396                | -2.58544               | -2.29998               | 1.13095                | 3.12922                | 3.36238                |
| RAD21    | 0.0442236         | -2.47629            | 2.47629              | 1 up vs 2            | 6.43944       | 46.0105        | 42.8707   | 1        | -2.84057               | 2.14864                | -2.05773               | -3.54563               | -4.19987               | -1.26344               | 2.24767                | 6.04981                |
| RANBP9   | 0.112166          | -3.97457            | 3.97457              | 1 up vs 2            | 3.46098       | 7333.05        | 12712.7   | 1        | -134.672               | 2.56019                | 9.29989                | -5.13177               | -10.0948               | 2.98739                | 51.148                 | -3.13811               |
| RARB     | 0.204626          | -33.7706            | 33.7706              | 1 up vs 2            | 2.02453       | 1.50E+06       | 4.44E+06  | 1        | -19.3672               | 4.09266                | 7.13677                | 2.49973                | -2587.08               | 80.6186                | 40.4171                | -3.75367               |
| RASAL1   | 0.193008          | 1.7705              | 1.7705               | 1 up vs 2            | 2.14912       | 422.083        | 1178.39   | 1        | -37.0944               | -18.1894               | -4.07108               | -25.8149               | -40.5202               | -37.1071               | -3.03412               | -34.9623               |
| RASD2    | 0.233288          | 3.78572             | 3.78572              | 1 up vs 2            | 1.75653       | 226.44         | 773.478   | 1        | -26.6494               | -2.60061               | 4.83686                | -3.74181               | -14.4119               | -12.842                | 8.70422                | -17.8231               |
| RASGRF1  | 0.544177          | 1.83904             | 1.83904              | 1 up vs 2            | 0.413071      | 56.5582        | 821.527   | 1        | -27.5937               | -2.10756               | -2.44754               | -2.06548               | -6.45489               | -5.62178               | 2.26691                | -24.8191               |
| RASGRP1  | 0.133611          | -2.10722            | 2.10722              | 1 up vs 2            | 3.00681       | 421.388        | 840.867   | 1        | -19.8034               | 2.41825                | 2.80722                | -6.71491               | -3.98168               | 1.74228                | 26.6097                | -9.45406               |
| RASL10A  | 0.148314          | -4.72642            | 4.72642              | 1 up vs 2            | 2.75022       | 751.453        | 1639.4    | 1        | -34.8537               | -2.80511               | 3.2789                 | 2.02451                | -16.741                | 4.36505                | 27.5675                | -14.9265               |
| RBM45    | 0.00142801        | -1.3158             | 1.3158               | 1 up vs 2            | 30.9537       | 126.034        | 24.4301   | 1        | -6.75552               | 4.35013                | 2.04011                | -2.51267               | -4.70686               | 1.55471                | 6.45885                | 3.29776                |
| RCP9     | 0.052163          | -1.78364            | 1.78364              | 1 up vs 2            | 5.83591       | 144.544        | 148.608   | 1        | -5.83716               | 5.78975                | 2.55118                | -4.00519               | -7.03539               | -2.11374               | 11.971                 | -2.42729               |
| RDM1     | 0.21026           | -1.90127            | 1.90127              | 1 up vs 2            | 1.96771       | 58.6294        | 178.775   | 1        | -4.66821               | 9.35299                | -2.84746               | -2.05186               | -4.27337               | 1.29766                | -5.95402               | -7.78778               |
| REEP3    | 0.359609          | 2.97452             | 2.97452              | 1 up vs 2            | 0.983595      | 68.5196        | 417.975   | 1        | -17.9757               | 2.66556                | -2.46426               | -4.28268               | -5.06178               | -17.4139               | 4.7149                 | -2.81017               |
| REPIN1   | 0.184069          | -1.5276             | 1.5276               | 1 up vs 2            | 2.25253       | 349.182        | 930.107   | 1        | -3.18081               | 11.9402                | 4.171                  | -23.7471               | 2.18518                | -14.639                | 13.5123                | 12.0107                |
| REXO1L3P | 0.173907          | 5.7031              | 5.7031               | 1 up vs 2            | 2.37913       | 36.033         | 90.873    | 1        | -7.87529               | -2.21096               | 6.52191                | -2.37515               | -5.69725               | -1.75974               | -4.89975               | -2.31199               |
| RG9MTD1  | 0.0095759         | -1.70772            | 1.70772              | 1 up vs 2            | 14.0184       | 394.469        | 168.836   | 1        | -17.4007               | 10.0344                | 2.00591                | -3.42316               | -6.61966               | 2.80856                | 9.2244                 | 2.71056                |
| RGS10    | 0.00325377        | -1.95341            | 1.95341              | 1 up vs 2            | 22.2903       | 114.731        | 30.8828   | 1        | -5.67558               | 3.5137                 | 5.64113                | -6.03553               | -3.81027               | -1.60811               | 3.0995                 | 2.59679                |
| RGLS1    | 0.268517          | -6.99857            | 6.99857              | 1 up vs 2            | 1.48646       | 174.925        | 706.072   | 1        | -19.4342               | 2.04143                | 13.6269                | -2.93226               | -2.98738               | -1.22674               | 8.16237                | -16.5661               |
| RHOBTB1  | 0.107529          | 2.78277             | 2.78277              | 1 up vs 2            | 3.57521       | 54.8797        | 92.1004   | 1        | -9.31364               | -7.37891               | -5.01138               | -4.22844               | -11.7922               | -1.54458               | 2.96504                | -4.20347               |
| RIMS1    | 0.139394          | -10.7864            | 10.7864              | 1 up vs 2            | 2.90139       | 70852.3        | 146521    | 1        | -483.807               | 7.42224                | -2.22985               | -13.4999               | -36.3876               | 13.582                 | 81.7234                | -18.0335               |
| RLTPR    | 0.213952          | 92.9528             | 92.9528              | 1 up vs 2            | 1.93165       | 166732         | 517895    | 1        | -887.795               | -5.01577               | -37.511                | -3.08479               | -13.4504               | 1.53801                | 27.218                 | -2.4441                |
| RNF145   | 0.00101718        | -1.26843            | 1.26843              | 1 up vs 2            | 35.2772       | 148.414        | 25.2425   | 1        | -7.31064               | 4.88632                | 2.30098                | -2.34782               | -5.26601               | 3.58941                | 6.49552                | 2.33794                |
| RNF149   | 0.00478682        | -2.51533            | 2.51533              | 1 up vs 2            | 18.9822       | 117.851        | 37.251    | 1        | -6.85226               | 2.79162                | 3.29123                | -2.34502               | -7.821                 | -1.62229               | 4.1554                 | 2.66041                |
| ROS1     | 0.152521          | -5.29584            | 5.29584              | 1 up vs 2            | 2.68326       | 2035.36        | 4551.24   | 1        | -2.1897                | -2.86797               | 32.5346                | -76.6349               | -4.31778               | -1.75554               | 2.64293                | -4.38806               |
| RPGR     | 0.084659          | -3.57595            | 3.57595              | 1 up vs 2            | 4.25755       | 153.072        | 215.718   | 1        | -5.64678               | 3.88391                | 3.05538                | -2.50999               | -13.0258               | -5.51634               | 10.7965                | -2.34675               |
| RPS26P11 | 0.551911          | -3.43506            | 3.43506              | 1 up vs 2            | 0.396909      | 87.5864        | 1324.03   | 1        | -16.8481               | -5.47863               | -7.17501               | 29.7435                | 2.98546                | -8.25691               | 4.92052                | 8.28476                |
| RRM2B    | 0.0886013         | -6.52383            | 6.52383              | 1 up vs 2            | 4.12297       | 223.707        | 325.552   | 1        | -21.645                | 3.74079                | 2.72495                | -3.05118               | -3.71725               | -1.58205               | 7.77628                | -5.40109               |
| RSPH10B  | 0.746152          | 1.80784             | 1.80784              | 1 up vs 2            | 0.114928      | 9.3685         | 489.096   | 1        | -2.58217               | 2.9803                 | 2.31102                | 20.2209                | -2.6319                | -1.24701               | 12.5196                | -2.72899               |
| RSPO2    | 0.0282474         | -12.2236            | 12.2236              | 1 up vs 2            | 8.26475       | 6282.16        | 4560.69   | 1        | -97.2414               | 9.89063                | 11.0417                | -59.2581               | -4.01873               | 2.68103                | 3.21114                | -4.9381                |
| RTN4     | 0.192562          | 52.127              | 52.127               | 1 up vs 2            | 2.15412       | 570120         | 1.59E+06  | 1        | -1589.67               | -3.36872               | -4.37354               | -6.02186               | -90.9233               | -26.8216               | 6.19795                | -25.5606               |
| RTN4R    | 0.106879          | -7.87105            | 7.87105              | 1 up vs 2            | 3.59178       | 2237.59        | 3737.85   | 1        | -73.6755               | -3.74815               | 5.2231                 | -2.15981               | -16.1182               | 1.27218                | 27.8147                | -11.091                |
| RUND3B   | 0.115277          | -1.16393            | 1.16393              | 1 up vs 2            | 3.38794       | 265.476        | 470.154   | 1        | -9.27823               | 2.2189                 | 3.36591                | -2.12656               | -7.79592               | 1.55111                | 23.7245                | -3.66641               |
| RUNX1T1  | 0.0924128         | -1.36271            | 1.36271              | 1 up vs 2            | 4.00042       | 530.406        | 795.525   | 1        | -18.5564               | 4.20667                | 3.40624                | -4.55869               | -5.98655               | 3.16857                | 29.4805                | -4.66904               |
| RYR2     | 0.452531          | 1.74665             | 1.74665              | 1 up vs 2            | 0.645022      | 171.735        | 1597.48   | 1        | -41.2032               | -4.83122               | -2.30858               | -8.03832               | -17.9226               | -25.4867               | 2.51613                | -33.978                |
| SAMD10   | 0.037139          | -1.03208            | 1.03208              | 1 up vs 2            | 7.11677       | 61.1643        | 51.5663   | 1        | -3.62849               | 2.07502                | -3.12874               | -2.55095               | -2.52302               | 4.81506                | 5.26656                | 5.02538                |
| SBDSP    | 0.0527116         | -6.39856            | 6.39856              | 1 up vs 2            | 5.79884       | 32.3118        | 33.4327   | 1        | -4.78857               | 3.16926                | 2.02081                | -2.4889                | -3.49304               | -1.34806               | 2.29828                | -3.33484               |
| SCD5     | 0.196842          | 4.91928             | 4.91928              | 1 up vs 2            | 2.10685       | 38.2202        | 108.846   | 1        | -11.0289               | 2.39553                | -2.48478               | -2.21427               | -3.75735               | -1.83861               | 3.00984                | -6.84181               |
| SCN2A    | 0.278292          | -2.55362            | 2.55362              | 1 up vs 2            | 1.42068       | 4234.15        | 17882.2   | 1        | -44.7222               | 4.15698                | 16.5261                | -3.09935               | -54.623                | 24.3091                | 100.826                | -78.9558               |
| SCN3B    | 0.113174          | -1.40199            | 1.40199              | 1 up vs 2            | 3.43702       | 4856.06        | 8477.22   | 1        | -61.7105               | 9.90097                | 10.6151                | -2.9828                | -24.4187               | 15.8129                | 89.9032                | -20.2969               |
| SCRT2    | 0.148764          | -3.30695            | 3.30695              | 1 up vs 2            | 2.74293       | 1872.85        | 4096.75   | 1        | -75.7161               | 14.6956                | 5.07643                | 5.46276                | -2.54644               | 4.99224                | 9.53851                | 2.38755                |
| SCYL2    | 0.00663338        | -1.68682            | 1.68682              | 1 up vs 2            | 16.5021       | 200.454        | 72.8829   | 1        | -8.53157               | 6.37291                | 3.14515                | -3.61424               | -7.32833               | -1.29716               | 8.7409                 | 2.27963                |
| SDR39U1  | 0.0818791         | -10.0693            | 10.0693              | 1 up vs 2            | 4.35772       | 52.2685        | 71.9667   | 1        | -3.77052               | 3.64652                | -4.13825               | -2.24065               | -8.39736               | 1.46089                | 3.78964                | -2.3739                |
| SEC23A   | 0.077009          | -1.33154            | 1.33154              | 1 up vs 2            | 4.54492       | 255.395        | 337.162   | 1        | -13.0118               | 3.52139                | 2.9101                 | -3.1717                | -3.81226               | 1.29512                | 19.3654                | -2.06357               |
| SELE     | 0.603004          | 6.33952             | 6.33952              | 1 up vs 2            | 0.301089      | 10.4927        | 209.095   | 1        | -3.7713                | -9.52795               | 2.58709                | 3.891                  | -8.54565               | 1.55471                | 5.22087                | -2.04991               |

| Gene ID  | p-value (1 vs. 2) | MeanRatio (1 vs. 2) | FoldChange (1 vs. 2) | FoldChange (1 vs. 2) | F(Gene Group) | SS(Gene Group) | SS(Error) | F(Error) | FoldChange (106 vs. n) | FoldChange (111 vs. n) | FoldChange (112 vs. n) | FoldChange (121 vs. n) | FoldChange (347 vs. n) | FoldChange (353 vs. n) | FoldChange (537 vs. n) | FoldChange (563 vs. n) |
|----------|-------------------|---------------------|----------------------|----------------------|---------------|----------------|-----------|----------|------------------------|------------------------|------------------------|------------------------|------------------------|------------------------|------------------------|------------------------|
| SENP1    | 0.00996151        | -4.69201            | 4.69201              | 1 up vs 2            | 13.7692       | 163.719        | 71.3415   | 1        | -10.7887               | 4.55814                | -2.42815               | -3.35709               | -8.96227               | -1.13853               | 2.97113                | 4.24571                |
| 14-Sep   | 0.226913          | 5.97339             | 5.97339              | 1 up vs 2            | 1.81186       | 1161.74        | 3847.13   | 1        | -9.50715               | 3.62503                | -9.43615               | -77.6697               | -2.51314               | -2.72097               | 3.56323                | -20.056                |
| 5-Sep    | 0.21642           | -1.34853            | 1.34853              | 1 up vs 2            | 1.90804       | 902.881        | 2839.18   | 1        | -20.6491               | -3.25332               | 5.02999                | -14.3598               | -2.79182               | 1.75895                | 54.3043                | -11.1214               |
| SERPINB8 | 0.0551844         | -1.25369            | 1.25369              | 1 up vs 2            | 5.63802       | 126.086        | 134.182   | 1        | -3.09268               | 12.0812                | 2.9489                 | -8.55519               | -2.03729               | -2.36282               | 2.31619                | 3.20976                |
| SFRS3    | 0.0140093         | -3.70294            | 3.70294              | 1 up vs 2            | 11.7497       | 235.814        | 120.419   | 1        | -12.8696               | 7.73291                | 2.42796                | -3.59675               | -10.0237               | -1.04199               | 5.46471                | -2.6606                |
| SH2B3    | 0.00727849        | -1.31863            | 1.31863              | 1 up vs 2            | 15.845        | 91.383         | 34.6039   | 1        | -4.83718               | 6.28422                | 3.05588                | -2.2919                | -4.78181               | -1.11092               | 4.49623                | 2.32926                |
| SHMT1    | 0.357506          | 27.4864             | 27.4864              | 1 up vs 2            | 0.992907      | 41.7315        | 252.178   | 1        | -7.00425               | 9.91529                | -7.16577               | -9.94732               | 2.26408                | -3.60236               | 2.03906                | -2.07681               |
| SHROOM2  | 0.0620684         | -7.19849            | 7.19849              | 1 up vs 2            | 5.2374        | 671.312        | 769.059   | 1        | -32.2757               | 5.10045                | 2.29023                | -10.3931               | -7.17263               | 2.0451                 | 14.9248                | -12.8208               |
| SIAH3    | 0.120485          | -15.0763            | 15.0763              | 1 up vs 2            | 3.27155       | 6445.06        | 11820.2   | 1        | -140.739               | 2.37893                | 2.47316                | -5.1476                | -19.0598               | -1.19105               | 25.164                 | -10.5904               |
| SIGLEC7  | 0.0463821         | -1.27357            | 1.27357              | 1 up vs 2            | 6.26163       | 579.804        | 555.578   | 1        | -17.4689               | 10.8905                | 7.80972                | -18.7716               | 6.68929                | 1.39839                | 15.9748                | 2.59909                |
| SKAP2    | 0.0375338         | -1.66962            | 1.66962              | 1 up vs 2            | 7.07457       | 188.883        | 160.193   | 1        | -11.1507               | 12.5907                | 2.29729                | -4.8638                | -2.817                 | 3.48229                | 3.14006                | -2.71217               |
| SKCG-1   | 0.119409          | -4.41084            | 4.41084              | 1 up vs 2            | 3.29501       | 137.726        | 250.79    | 1        | -16.2449               | 3.38519                | -5.10462               | -2.15149               | -2.5633                | 8.87967                | 3.38146                | -2.62194               |
| SKIP     | 0.12335           | -7.1433             | 7.1433               | 1 up vs 2            | 3.21044       | 2000.43        | 3738.61   | 1        | -3.9321                | 2.10489                | 3.94554                | -77.8154               | -4.20948               | -1.83388               | 12.6476                | 3.19123                |
| SLC12A2  | 0.913248          | 1.1262              | 1.1262               | 1 up vs 2            | 0.0129087     | 1.50444        | 699.268   | 1        | -4.39884               | -3.24062               | -3.02217               | -4.2961                | -15.2857               | -28.9521               | -2.73479               | 2.4607                 |
| SLC16A13 | 0.311618          | -1.58011            | 1.58011              | 1 up vs 2            | 1.22032       | 56.2983        | 276.805   | 1        | 2.64171                | -2.95325               | 4.0126                 | 3.10129                | 4.32441                | 2.1289                 | 2.40158                | -16.2087               |
| SLC16A4  | 0.0965737         | -1.57274            | 1.57274              | 1 up vs 2            | 3.87432       | 352.269        | 545.545   | 1        | -23.2954               | 13.1275                | 2.36389                | -5.76541               | 3.92349                | -3.14923               | 2.53637                | 10.0427                |
| SLC22A17 | 0.279925          | 19.8609             | 19.8609              | 1 up vs 2            | 1.41003       | 21.0421        | 89.5388   | 1        | -3.55295               | 3.79848                | -2.02595               | -2.20152               | -4.82835               | -3.88976               | 5.7051                 | -4.47595               |
| SLC22A18 | 0.0211951         | -1.43641            | 1.43641              | 1 up vs 2            | 9.59195       | 743.505        | 465.081   | 1        | -2.09952               | 16.7952                | 2.38234                | -23.0748               | -10.0458               | -1.30903               | 8.26678                | 14.7306                |
| SLC22A6  | 0.0568376         | -5.2675             | 5.2675               | 1 up vs 2            | 5.53584       | 1084.18        | 1175.08   | 1        | -47.4485               | 7.10421                | 2.75449                | -3.71812               | -9.46248               | -1.02736               | 6.98718                | 3.36488                |
| SLC25A26 | 0.0497315         | 12.9597             | 12.9597              | 1 up vs 2            | 6.0068        | 2482.67        | 2479.86   | 1        | -58.6015               | 2.95488                | -2.65193               | -2.06234               | -5.7628                | -1.09005               | 5.23883                | -19.6645               |
| SLC26A8  | 0.129388          | -7.34394            | 7.34394              | 1 up vs 2            | 3.0879        | 2765.88        | 5374.28   | 1        | -92.5935               | 14.2776                | 3.98585                | -3.98045               | -4.83934               | -1.07544               | 8.28714                | -2.45996               |
| SLC2A13  | 0.0463349         | -4.41934            | 4.41934              | 1 up vs 2            | 6.2654        | 8849.88        | 8475.01   | 1        | -69.1779               | 51.968                 | 35.9309                | -5.72078               | -93.1753               | 2.58019                | 6.81896                | -33.9123               |
| SLC30A3  | 0.0428212         | 14.2615             | 14.2615              | 1 up vs 2            | 6.56137       | 1641.22        | 1500.81   | 1        | -41.9728               | -8.27637               | 3.03809                | -2.38676               | -51.0907               | -1.26499               | 4.55865                | -9.21018               |
| SLC31A1  | 0.00542743        | -1.26206            | 1.26206              | 1 up vs 2            | 17.9951       | 105.888        | 35.3055   | 1        | -2.43153               | 4.40139                | 2.71698                | -2.34197               | -7.80473               | 1.21394                | 6.19116                | 2.0872                 |
| SLC36A1  | 0.00168182        | -2.68266            | 2.68266              | 1 up vs 2            | 29.0376       | 229.757        | 47.4743   | 1        | -11.5521               | 5.43522                | 2.23788                | -3.32953               | -9.30967               | 1.31701                | 4.01875                | 2.02054                |
| SLC39A10 | 0.0155763         | -1.6593             | 1.6593               | 1 up vs 2            | 11.1678       | 479.293        | 257.504   | 1        | -11.4945               | 10.5798                | 2.56063                | -3.66328               | -14.7703               | 4.43078                | 15.1042                | -2.61452               |
| SLC4A7   | 0.00596853        | -1.19671            | 1.19671              | 1 up vs 2            | 17.2754       | 558.905        | 194.116   | 1        | -16.9467               | 11.8991                | 3.51422                | -7.23622               | -4.03373               | 1.23285                | 10.8046                | 11.8468                |
| SLC6A9   | 0.853419          | 2.11291             | 2.11291              | 1 up vs 2            | 0.037201      | 3.15603        | 509.023   | 1        | -2.14745               | 3.22106                | 2.36197                | -2.68143               | -2.56058               | -21.0641               | 6.9973                 | 2.65494                |
| SLC7A2   | 0.757691          | 3.13277             | 3.13277              | 1 up vs 2            | 0.104297      | 0.888272       | 51.1004   | 1        | 3.22931                | -3.34956               | 2.15282                | 2.40775                | -2.60402               | 2.57673                | -2.02328               | 2.2569                 |
| SMC6     | 0.00714687        | -1.11245            | 1.11245              | 1 up vs 2            | 15.9726       | 235.909        | 88.618    | 1        | -10.3137               | 8.67994                | 2.58416                | -2.80285               | -4.60441               | 1.00688                | 9.77275                | 4.50573                |
| SMPD3    | 0.0696672         | -20.2496            | 20.2496              | 1 up vs 2            | 4.8599        | 453.323        | 559.67    | 1        | -20.378                | 2.43081                | 8.98936                | -13.5271               | -10.5468               | -1.5628                | 11.0984                | -17.2971               |
| SMPDL3A  | 0.00903438        | -1.95541            | 1.95541              | 1 up vs 2            | 14.392        | 142.087        | 59.236    | 1        | -7.15288               | 4.63682                | 2.97608                | -3.37353               | -6.75257               | 1.5987                 | 7.547                  | -2.03107               |
| SNAPC1   | 0.0817198         | -1.15997            | 1.15997              | 1 up vs 2            | 4.3636        | 226.43         | 311.344   | 1        | -2.25416               | 2.4871                 | 2.39549                | -2.77636               | -12.6741               | -1.47912               | 3.43627                | 18.5986                |
| SNCG     | 0.953408          | 1.25181             | 1.25181              | 1 up vs 2            | 0.00371026    | 1.1048         | 1786.62   | 1        | -10.1098               | -23.935                | 4.3804                 | 2.65081                | -3.989                 | -14.8027               | 29.0222                | -9.90682               |
| SNORA12  | 0.0150992         | -2.89583            | 2.89583              | 1 up vs 2            | 11.3364       | 768.69         | 406.844   | 1        | -11.0944               | 5.06957                | 2.94117                | -29.9854               | -4.07141               | 3.85326                | 2.95382                | 11.1685                |
| SNORA71D | 0.256398          | 92.5927             | 92.5927              | 1 up vs 2            | 1.57316       | 344704         | 1.31E+06  | 1        | -34.4928               | 3.51803                | 13.1091                | -34.7487               | 1369.59                | 7.76121                | -3.85992               | 2.87782                |
| SNORD18B | 0.31465           | 4.06166             | 4.06166              | 1 up vs 2            | 1.20371       | 111.119        | 553.883   | 1        | -2.41849               | 4.65788                | -4.42271               | 8.80146                | 24.2551                | 1.06472                | 13.4093                | -2.13714               |
| SNORD64  | 0.338828          | -4.26252            | 4.26252              | 1 up vs 2            | 1.07963       | 155.616        | 864.831   | 1        | 2.79749                | 6.30139                | -2.18254               | 5.3211                 | -30.2557               | 3.59896                | 4.57716                | -3.63924               |
| SNORD91B | 0.202893          | -51.9516            | 51.9516              | 1 up vs 2            | 2.04247       | 42603.4        | 125153    | 1        | -436.572               | 3.20232                | -2.3739                | -4.91477               | -2.18599               | -4.00962               | 8.01534                | 9.3994                 |
| SNX10    | 0.00429433        | -1.1103             | 1.1103               | 1 up vs 2            | 19.8696       | 973.663        | 294.015   | 1        | -21.0526               | 9.14598                | 15.1448                | -7.17252               | -7.74324               | 7.34289                | 19.4493                | 2.90909                |
| SOCS2    | 0.0724536         | -1.20633            | 1.20633              | 1 up vs 2            | 4.73525       | 563.873        | 714.479   | 1        | -11.8744               | 2.77021                | 2.65045                | -8.44697               | -8.1237                | 31.16                  | 4.92264                | -2.20359               |
| SOHLH1   | 0.218784          | 116.043             | 116.043              | 1 up vs 2            | 1.88579       | 662709         | 2.11E+06  | 1        | -1784.51               | -22.921                | 2.38822                | -4.46725               | -10.0623               | -1.18582               | 32.4333                | -36.5533               |
| SORCS1   | 0.0395847         | -1.21977            | 1.21977              | 1 up vs 2            | 6.86455       | 440.319        | 384.863   | 1        | -5.5495                | 2.68739                | 3.39274                | -2.77268               | -16.9402               | 18.6978                | 11.7497                | -2.0097                |
| SPAG8    | 0.0654276         | -1.5455             | 1.5455               | 1 up vs 2            | 5.06318       | 783.456        | 928.415   | 1        | -18.685                | 21.8241                | 5.06229                | 2.51524                | -21.0629               | 2.0502                 | 18.7381                | -7.52307               |
| SPI1     | 0.140187          | -1.65181            | 1.65181              | 1 up vs 2            | 2.8874        | 291.704        | 606.158   | 1        | 3.06894                | 14.7699                | 2.39884                | -3.22756               | -23.1496               | -5.13843               | 2.14953                | 9.33804                |
| SPINK6   | 0.350054          | -1.85483            | 1.85483              | 1 up vs 2            | 1.02663       | 116.194        | 679.083   | 1        | -4.14864               | -2.51693               | -2.36651               | -4.38261               | 23.8752                | 1.21354                | 2.83262                | -12.9501               |
| SPINT2   | 0.0143862         | 57.2235             | 57.2235              | 1 up vs 2            | 11.602        | 267.209        | 138.188   | 1        | -16.3831               | -2.46476               | 2.30901                | -3.67223               | -16.3951               | -1.96711               | 3.24734                | -2.18612               |
| SPTLC1   | 0.0752334         | -1.87615            | 1.87615              | 1 up vs 2            | 4.61723       | 124.927        | 162.341   | 1        | -10.8316               | 5.88009                | 2.10939                | -2.64949               | -2.4926                | -1.53217               | 10.4177                | -2.68484               |
| SST      | 0.000467253       | 8.29094             | 8.29094              | 1 up vs 2            | 47.2523       | 6802.46        | 863.763   | 1        | -86.0156               | -4.92666               | -8.80436               | -60.933                | -58.5335               | -8.17013               | 4.1681                 | -23.5735               |
| ST7OT4   | 0.195914          | -9.25198            | 9.25198              | 1 up vs 2            | 2.11697       | 4077.02        | 11555.2   | 1        | -2.13457               | 13.7945                | 10.0171                | 4.89421                | -129.006               | -1.04189               | 2.0613                 | -2.08879               |
| ST8SIA3  | 0.214284          | 28.9607             | 28.9607              | 1 up vs 2            | 1.92845       | 112648         | 350484    | 1        | -732.453               | -4.21543               | 2.87106                | -3.63892               | -25.5379               | -7.06316               | 38.733                 | -74.1567               |
| STAG3L1  | 0.0593787         | -4.89476            | 4.89476              | 1 up vs 2            | 5.38641       | 429.819        | 478.781   | 1        | -27.714                | 10.7139                | 2.15718                | -2.72404               | -7.27821               | -2.80636               | 5.01548                | -2.23782               |

| Gene ID    | p-value (1 vs. 2) | MeanRatio (1 vs. 2) | FoldChange (1 vs. 2) | FoldChange (1 vs. 2) | F(Gene Group) | SS(Gene Group) | SS(Error) | F(Error) | FoldChange (106 vs. n) | FoldChange (111 vs. n) | FoldChange (112 vs. n) | FoldChange (121 vs. n) | FoldChange (347 vs. n) | FoldChange (353 vs. n) | FoldChange (537 vs. n) | FoldChange (563 vs. n) |
|------------|-------------------|---------------------|----------------------|----------------------|---------------|----------------|-----------|----------|------------------------|------------------------|------------------------|------------------------|------------------------|------------------------|------------------------|------------------------|
| STAT4      | 0.0777492         | -15.6681            | 15.6681              | 1 up vs 2            | 4.51544       | 14961.1        | 19880     | 1        | -56.7929               | -2.47265               | 5.43527                | -2.29009               | -192.82                | 3.10434                | 26.2536                | -5.5248                |
| STAU2      | 0.0207268         | -2.30201            | 2.30201              | 1 up vs 2            | 9.70078       | 201.618        | 124.702   | 1        | -10.8665               | 7.04604                | 2.14292                | -2.02901               | -8.79223               | 1.01534                | 8.26772                | -2.77001               |
| STMN1      | 0.00440559        | -1.4027             | 1.4027               | 1 up vs 2            | 19.6576       | 174.068        | 53.1298   | 1        | -10.3593               | 2.59237                | 2.93593                | -4.22104               | -2.29471               | 5.75416                | 2.02095                | 6.74726                |
| SUNC1      | 0.229887          | -4.86822            | 4.86822              | 1 up vs 2            | 1.78577       | 1647.89        | 5536.73   | 1        | -79.9324               | 2.00044                | -5.70931               | 2.05414                | 4.09668                | -4.7885                | 2.05568                | 31.7013                |
| SV2B       | 0.361089          | 3.04066             | 3.04066              | 1 up vs 2            | 0.977092      | 5428.28        | 33333.3   | 1        | -215.8                 | -18.9616               | -2.13648               | -7.60906               | -17.1098               | -78.9719               | 16.2657                | -48.0307               |
| SVIL       | 0.4122            | -2.99744            | 2.99744              | 1 up vs 2            | 0.776209      | 163.676        | 1265.19   | 1        | -4.9241                | 3.60703                | 5.15685                | -5.5598                | -10.5336               | -26.964                | 20.4375                | 9.44898                |
| SVOP       | 0.208045          | 128.625             | 128.625              | 1 up vs 2            | 1.98978       | 732346         | 2.21E+06  | 1        | -1842.3                | -6.49167               | -2.75171               | -7.234                 | -40.0593               | -2.05677               | 30.5807                | -43.765                |
| SYCE1      | 0.269621          | -38.4807            | 38.4807              | 1 up vs 2            | 1.47886       | 184.374        | 748.04    | 1        | -28.8283               | -5.41949               | 2.42554                | 2.05165                | -2.2187                | 9.10645                | 2.97633                | -7.83299               |
| SYK        | 0.0222836         | -2.37122            | 2.37122              | 1 up vs 2            | 9.35105       | 327.677        | 210.25    | 1        | -3.03208               | 5.5356                 | 3.45801                | -19.1037               | -5.75934               | -2.61503               | 7.67908                | 5.54907                |
| SYNJ1      | 0.739826          | 1.58662             | 1.58662              | 1 up vs 2            | 0.121005      | 30.8825        | 1531.3    | 1        | -2.91068               | 2.21806                | 6.23573                | 2.97529                | -32.9947               | -9.75753               | -3.7393                | -29.5484               |
| SYNPR      | 0.10954           | 12.8704             | 12.8704              | 1 up vs 2            | 3.52487       | 382990         | 651922    | 1        | -1134.2                | -23.1238               | -31.4645               | -89.6984               | -246.181               | -1.84176               | 16.6633                | -150.603               |
| SYT12      | 0.173353          | -14.1026            | 14.1026              | 1 up vs 2            | 2.38632       | 71144.6        | 178881    | 1        | -11.1799               | -3.26482               | 20.0277                | -9.12531               | -525.376               | -4.68966               | 47.805                 | 4.61123                |
| SYT7       | 0.0902064         | -7.39956            | 7.39956              | 1 up vs 2            | 4.0705        | 2071.4         | 3053.28   | 1        | -70.0636               | -2.66558               | 3.26292                | -4.82737               | -12.9509               | 4.06247                | 22.6468                | -7.52124               |
| SYTL2      | 0.00964924        | -54.5526            | 54.5526              | 1 up vs 2            | 13.97         | 343.755        | 147.64    | 1        | -5.15369               | -2.34036               | 3.32775                | -15.8794               | -18.8562               | -4.20213               | 2.29895                | 2.13447                |
| TAC1       | 0.17303           | 2.89479             | 2.89479              | 1 up vs 2            | 2.39055       | 268.125        | 672.964   | 1        | -25.5239               | -5.72916               | -4.33421               | -11.0459               | -18.2384               | -23.1578               | 10.2675                | -8.60199               |
| TAF9       | 0.00491121        | -1.10197            | 1.10197              | 1 up vs 2            | 18.7771       | 112.248        | 35.8675   | 1        | -5.03595               | 3.37706                | 8.60992                | -4.37887               | -2.75415               | 1.2118                 | 2.9906                 | 2.21544                |
| tAKR       | 0.999436          | 1.02759             | 1.02759              | 1 up vs 2            | 5.42E-07      | 1.01E-05       | 112.035   | 1        | 2.44558                | -2.70043               | -4.07944               | -7.04904               | 4.34381                | 1.84427                | 2.13825                | 2.37622                |
| TANK       | 0.646751          | -34.5519            | 34.5519              | 1 up vs 2            | 0.232515      | 5.53508        | 142.832   | 1        | -5.86838               | 2.37774                | -4.43811               | -5.67343               | 6.53234                | 1.30557                | 3.17774                | -2.1813                |
| TBRG1      | 0.733631          | -1.63281            | 1.63281              | 1 up vs 2            | 0.127129      | 897.878        | 42376.5   | 1        | -18.6254               | 28.4625                | -5.3756                | -12.2747               | -9.81404               | -129.247               | 158.199                | -10.4805               |
| TBX5       | 0.462891          | -2.76339            | 2.76339              | 1 up vs 2            | 0.614561      | 9.99306        | 97.5629   | 1        | -5.69736               | 2.62373                | -4.40541               | -2.59804               | 3.20991                | 2.33947                | 4.69262                | -2.18323               |
| TCERG1L    | 0.0196756         | 140.189             | 140.189              | 1 up vs 2            | 9.95753       | 2415.44        | 1455.45   | 1        | -42.4288               | -3.07979               | 2.74608                | -6.92065               | -59.1001               | -1.18642               | 3.01649                | -2.78569               |
| TDP1       | 0.11608           | -7.84787            | 7.84787              | 1 up vs 2            | 3.36951       | 1242.08        | 2211.74   | 1        | -4.96992               | 3.92382                | 2.07212                | -2.36623               | -61.1509               | 1.26897                | 3.70537                | 3.57444                |
| TDRD9      | 0.238738          | 989.326             | 989.326              | 1 up vs 2            | 1.71094       | 566.031        | 1984.98   | 1        | -9.41153               | -2.62587               | 2.25739                | 8.72405                | -51.4896               | -3.87794               | 6.60251                | -2.44399               |
| TFCP2L1    | 0.138529          | 9.56317             | 9.56317              | 1 up vs 2            | 2.91677       | 130.774        | 269.01    | 1        | -18.3653               | 2.69054                | -8.238                 | -7.30791               | -2.30681               | -2.90355               | 6.72656                | -3.1519                |
| TGIF2LY    | 0.621107          | 2.12584             | 2.12584              | 1 up vs 2            | 0.271315      | 50.368         | 1113.86   | 1        | -5.00425               | 18.7802                | -9.52119               | 30.2481                | 4.11583                | 1.15275                | 2.69113                | 9.91517                |
| TIFA       | 0.150647          | -1.88498            | 1.88498              | 1 up vs 2            | 2.71276       | 65.1845        | 144.173   | 1        | -4.67457               | 3.49384                | -3.83922               | -2.45727               | -4.42547               | -3.9457                | 9.93111                | 4.57874                |
| TINAG      | 0.209083          | -2.34429            | 2.34429              | 1 up vs 2            | 1.97939       | 446.961        | 1354.84   | 1        | -40.5261               | 5.75534                | 2.17205                | 3.19962                | 4.8579                 | 1.20607                | 7.06615                | 6.8838                 |
| TM6SF1     | 0.0227793         | -7.32185            | 7.32185              | 1 up vs 2            | 9.24649       | 135.884        | 88.1744   | 1        | -6.83406               | 2.24126                | 2.9233                 | -6.03939               | -9.59668               | -1.16347               | 6.51051                | -5.39674               |
| TM9SF1     | 0.20894           | -1.60926            | 1.60926              | 1 up vs 2            | 1.98083       | 70.9782        | 214.996   | 1        | -2.72205               | -2.3743                | -4.32965               | -3.99008               | -4.6718                | -1.12158               | 13.1851                | 6.43044                |
| TMEM128    | 0.134095          | -7.94275            | 7.94275              | 1 up vs 2            | 2.99775       | 1681.5         | 3365.52   | 1        | -9.94618               | 8.96224                | -2.97214               | -72.7438               | 2.89628                | 1.32705                | 6.90512                | 2.52124                |
| TMEM130    | 0.518826          | 2.55779             | 2.55779              | 1 up vs 2            | 0.469435      | 330331         | 4.22E+06  | 1        | -2050.31               | -11.4182               | -10.8252               | -2.78514               | -14.4319               | 4.89463                | 13.8297                | -1343.69               |
| TMEM158    | 0.00223051        | -2.12964            | 2.12964              | 1 up vs 2            | 25.9675       | 257.225        | 59.4339   | 1        | -9.32626               | 3.03485                | 3.01782                | -3.29199               | -11.2923               | 2.50359                | 18.2314                | 2.03307                |
| TMEM161A   | 0.120889          | -2.29434            | 2.29434              | 1 up vs 2            | 3.26281       | 307.414        | 565.305   | 1        | -2.40131               | 11.2114                | -2.19875               | 2.02495                | -26.3766               | 1.67114                | 5.42808                | 3.32215                |
| TMEM16A    | 0.115686          | -35.5269            | 35.5269              | 1 up vs 2            | 3.37853       | 1187.28        | 2108.52   | 1        | -59.2294               | 5.00435                | 2.08301                | -9.94779               | -4.24755               | -1.6275                | 10.1453                | -12.1606               |
| TMEM182    | 0.119446          | -9.83825            | 9.83825              | 1 up vs 2            | 3.2942        | 2535.66        | 4618.42   | 1        | 16.7236                | -7.49279               | -4.23651               | -3.65644               | 87.0769                | -2.98757               | 4.25858                | -6.50679               |
| TMEM191B   | 0.0735201         | 6.45224             | 6.45224              | 1 up vs 2            | 4.68925       | 572.863        | 732.99    | 1        | -21.8148               | -4.69678               | -8.3307                | -3.39758               | -36.8433               | -1.15711               | 7.09803                | -8.94294               |
| TMEM34     | 0.0505555         | -1.85982            | 1.85982              | 1 up vs 2            | 5.94764       | 495.673        | 500.037   | 1        | -25.1022               | 13.1264                | 2.99812                | -3.67027               | -2.9488                | 1.87995                | 12.479                 | -2.05662               |
| TMEM53     | 0.269516          | -3.13631            | 3.13631              | 1 up vs 2            | 1.47958       | 54.6259        | 221.519   | 1        | -2.41601               | 5.09934                | 8.65569                | -6.17773               | -3.6842                | 1.13143                | 2.35907                | -10.7209               |
| TMEM70     | 0.00159808        | -1.38315            | 1.38315              | 1 up vs 2            | 29.6246       | 168.727        | 34.1731   | 1        | -8.24141               | 5.41501                | 3.4064                 | -2.25742               | -6.01816               | 1.30813                | 6.42021                | 3.3529                 |
| TMEM70     | 0.15615           | -11.3511            | 11.3511              | 1 up vs 2            | 2.62756       | 2750.34        | 6280.36   | 1        | -99.7272               | 5.32659                | 3.12681                | -2.24142               | -3.62706               | -1.16734               | 6.14353                | 2.07484                |
| TMEM95     | 0.378352          | -1.58006            | 1.58006              | 1 up vs 2            | 0.904288      | 26.3555        | 174.87    | 1        | -5.65392               | -3.42463               | 9.45649                | -5.30605               | 4.07187                | -3.48994               | 2.52376                | 2.19999                |
| TMPO       | 0.188698          | -11.5445            | 11.5445              | 1 up vs 2            | 2.19811       | 68369.9        | 186624    | 1        | -524.363               | 68.5681                | 5.23086                | 2.21062                | -5.04716               | 1.8774                 | 19.0481                | -18.6134               |
| TMPPRSS11F | 0.27919           | -1.25309            | 1.25309              | 1 up vs 2            | 1.41481       | 499.699        | 2119.15   | 1        | -4.951                 | -3.46379               | -33.9016               | -5.08779               | 37.277                 | 1.05882                | 3.68159                | -3.6031                |
| TNFAIP8L1  | 0.00197102        | -4.77454            | 4.77454              | 1 up vs 2            | 27.2767       | 498.376        | 109.627   | 1        | -11.3463               | 3.56842                | 2.2216                 | -14.8441               | -14.2498               | 1.57124                | 10.4318                | -3.67644               |
| TNFSF12    | 0.0629105         | -3.93964            | 3.93964              | 1 up vs 2            | 5.19254       | 58.4933        | 67.5892   | 1        | -2.03001               | -2.40346               | 2.00791                | -2.62274               | -8.7112                | -1.90794               | 4.85104                | 3.10608                |
| TNIIK      | 0.0320038         | -1.71756            | 1.71756              | 1 up vs 2            | 7.72751       | 162.533        | 126.198   | 1        | -6.29844               | 3.1088                 | 2.10435                | -6.66968               | -4.68512               | 1.62862                | 12.6605                | -2.37211               |
| TNIP3      | 0.0400176         | -1.72659            | 1.72659              | 1 up vs 2            | 6.82209       | 189.148        | 166.355   | 1        | -4.46422               | 2.2021                 | -2.12296               | -2.20513               | -12.4112               | 1.81018                | 4.55706                | 11.972                 |
| TPM4       | 0.00969583        | -1.1678             | 1.1678               | 1 up vs 2            | 13.9395       | 105.067        | 45.2243   | 1        | -3.93429               | 7.15308                | 3.02239                | -2.25755               | -5.90589               | -1.12588               | 5.30267                | 2.9134                 |
| TPM4       | 0.0166054         | -1.04753            | 1.04753              | 1 up vs 2            | 10.8268       | 120.903        | 67.0024   | 1        | -2.7762                | 5.99522                | 2.66445                | -2.69788               | -6.85057               | -2.0266                | 5.6868                 | 7.28927                |
| TRAIP      | 0.212412          | -62.5416            | 62.5416              | 1 up vs 2            | 1.94658       | 1.27E+06       | 3.90E+06  | 1        | -2421.47               | 48.5816                | -3.06078               | 3.14771                | -8.20723               | 2.62515                | 20.5789                | -4.06041               |
| TRAPPC6B   | 0.937739          | 1.08875             | 1.08875              | 1 up vs 2            | 0.00663277    | 1.08433        | 980.882   | 1        | -13.9943               | -34.6002               | -5.72247               | -4.36051               | -9.63313               | -5.90015               | 5.62785                | -2.24927               |
| TRHDE      | 0.219403          | -8.31735            | 8.31735              | 1 up vs 2            | 1.88002       | 1701.83        | 5431.34   | 1        | -86.169                | 9.0835                 | 2.54857                | 8.63554                | -3.14765               | 2.64825                | 5.74212                | -3.85521               |

| Gene ID     | p-value (1 vs. 2) | MeanRatio (1 vs. 2) | FoldChange (1 vs. 2) | FoldChange (1 vs. 2) | F(Gene Group) | SS(Gene Group) | SS(Error) | F(Error) | FoldChange (106 vs. n) | FoldChange (111 vs. n) | FoldChange (112 vs. n) | FoldChange (121 vs. n) | FoldChange (347 vs. n) | FoldChange (353 vs. n) | FoldChange (537 vs. n) | FoldChange (563 vs. n) |
|-------------|-------------------|---------------------|----------------------|----------------------|---------------|----------------|-----------|----------|------------------------|------------------------|------------------------|------------------------|------------------------|------------------------|------------------------|------------------------|
| TRIM37      | 0.0611787         | -1.78219            | 1.78219              | 1 up vs 2            | 5.2857        | 479.031        | 543.766   | 1        | -22.1498               | 7.54603                | 5.29024                | -2.38908               | -6.17747               | 2.10228                | 19.2308                | -5.44405               |
| TRIM6-TRIM3 | 0.00602641        | -5.6278             | 5.6278               | 1 up vs 2            | 17.2036       | 624.411        | 217.772   | 1        | -14.1782               | 6.20565                | -3.45382               | -7.2249                | -25.0832               | 4.38864                | 4.3036                 | 2.3228                 |
| TRPM8       | 0.074205          | -1.64339            | 1.64339              | 1 up vs 2            | 4.66019       | 303381         | 390604    | 1        | -8.90219               | 110.19                 | 147.824                | -729.818               | -11.5097               | 319.115                | 156.851                | 26.8757                |
| TSC22D3     | 0.0883367         | -2.1949             | 2.1949               | 1 up vs 2            | 4.13174       | 48.5783        | 70.5441   | 1        | -6.01669               | 3.93219                | 2.4069                 | -2.03384               | -2.44005               | -1.41993               | 6.30433                | -3.25763               |
| TSPAN14     | 0.004878          | -1.53271            | 1.53271              | 1 up vs 2            | 18.8312       | 110.135        | 35.0913   | 1        | -4.9816                | 5.30698                | 2.34449                | -3.8601                | -5.07251               | -1.11999               | 6.30933                | 2.28945                |
| TSSK4       | 0.22786           | -25.0798            | 25.0798              | 1 up vs 2            | 1.8035        | 28726.7        | 95569.7   | 1        | -371.367               | 3.78898                | 9.15535                | 11.2449                | 3.02744                | 2.48546                | 4.2056                 | 4.09513                |
| TTBK2       | 0.875313          | 1.44966             | 1.44966              | 1 up vs 2            | 0.0268105     | 4.92876        | 1103.02   | 1        | -10.4661               | 14.8483                | -2.23834               | -2.74226               | -2.47254               | -25.4215               | 8.3797                 | -13.5964               |
| TUBB1       | 0.491077          | 14.0129             | 14.0129              | 1 up vs 2            | 0.537586      | 107.341        | 1198.03   | 1        | -34.4314               | 4.94415                | 2.11833                | 7.867                  | 2.12126                | -1.51383               | 2.09633                | -10.5522               |
| TWSG1       | 0.0116914         | -1.25352            | 1.25352              | 1 up vs 2            | 12.7918       | 83.0252        | 38.9431   | 1        | -3.2152                | 3.39582                | 2.46306                | -2.69861               | -5.19059               | -1.67602               | 6.45037                | 4.13109                |
| TXNDC9      | 0.145606          | -1.4451             | 1.4451               | 1 up vs 2            | 2.79474       | 180.561        | 387.645   | 1        | -6.04254               | 4.92346                | 19.4141                | -3.44219               | -7.91466               | -2.66303               | 4.12387                | -5.73126               |
| TXNL4A      | 0.115111          | -1.93272            | 1.93272              | 1 up vs 2            | 3.39176       | 118.064        | 208.854   | 1        | -7.24769               | 4.10047                | -2.10072               | -4.47743               | -3.96324               | 1.04377                | 14.2407                | -3.75549               |
| UACA        | 0.101146          | -89.6921            | 89.6921              | 1 up vs 2            | 3.74409       | 5432.82        | 8706.24   | 1        | -127.626               | -2.49302               | 4.2717                 | -2.51965               | -29.5592               | 1.4386                 | 2.59833                | -2.84796               |
| UBE2H       | 0.0544495         | -3.02232            | 3.02232              | 1 up vs 2            | 5.68478       | 201.693        | 212.877   | 1        | -16.1511               | 5.12287                | 2.47051                | -5.00084               | -2.22727               | -2.33858               | 9.75626                | -2.11853               |
| UBE2L6      | 0.56302           | 3.16674             | 3.16674              | 1 up vs 2            | 0.374496      | 7.66106        | 122.742   | 1        | -2.77082               | 2.0397                 | -2.2563                | -3.6032                | -2.48878               | -2.20207               | 6.28652                | -8.53238               |
| UGP2        | 0.213367          | -57.8454            | 57.8454              | 1 up vs 2            | 1.9373        | 182719         | 565900    | 1        | -920.97                | 11.2386                | 13.1381                | -3.20695               | 3.58088                | 2.26717                | -3.69363               | 3.57436                |
| UHRF1BP1L   | 0.611176          | -30.5243            | 30.5243              | 1 up vs 2            | 0.287396      | 29.3078        | 611.864   | 1        | -2.89549               | 4.2765                 | -4.64722               | -7.99689               | 22.3769                | 5.12948                | 2.72901                | -3.72901               |
| UNC13A      | 0.0867087         | 11.6359             | 11.6359              | 1 up vs 2            | 4.18653       | 146.882        | 210.507   | 1        | -20.1072               | 2.04945                | -2.33224               | -3.0151                | -5.92669               | -1.76054               | 2.92583                | -5.04332               |
| UNC13C      | 0.0451279         | 24.7868             | 24.7868              | 1 up vs 2            | 6.36355       | 89.256         | 84.1568   | 1        | -12.6258               | -2.2279                | -2.44358               | -5.15951               | -3.78338               | -2.89294               | 3.86531                | 2.24883                |
| UNC5D       | 0.812682          | 1.45479             | 1.45479              | 1 up vs 2            | 0.0613176     | 31.6779        | 3099.72   | 1        | -15.2556               | -56.9312               | 14.6137                | -11.1618               | -13.0273               | -3.7512                | 4.34807                | -3.46886               |
| UTP20       | 0.606203          | 3.34381             | 3.34381              | 1 up vs 2            | 0.295678      | 6.28849        | 127.608   | 1        | 8.01361                | 3.58621                | -5.39984               | -2.91308               | 2.73761                | -1.26343               | 2.27977                | 4.70408                |
| VAMP1       | 0.261746          | 3.04593             | 3.04593              | 1 up vs 2            | 1.53417       | 373.816        | 1461.96   | 1        | -22.9271               | -2.36485               | -31.7436               | -2.15481               | -37.9817               | 1.93208                | -5.23832               | 2.90761                |
| VAT1L       | 0.000757991       | -1.30406            | 1.30406              | 1 up vs 2            | 39.4434       | 399.23         | 60.7295   | 1        | -7.82409               | 5.44287                | 2.25529                | -12.0113               | -4.94083               | 8.50939                | 5.56156                | 9.8965                 |
| VIP         | 0.0354517         | -2.89512            | 2.89512              | 1 up vs 2            | 7.30421       | 2197.19        | 1804.87   | 1        | -52.5117               | 6.35968                | 27.1675                | -3.43793               | -20.3812               | 1.09386                | 12.5768                | -3.25563               |
| VIPR1       | 0.0411947         | 4.54707             | 4.54707              | 1 up vs 2            | 6.70971       | 320.42         | 286.528   | 1        | -25.2761               | -6.516                 | -3.47287               | -6.32636               | -18.6714               | -1.42637               | 3.13723                | -10.1492               |
| VNN2        | 0.30533           | -11.5704            | 11.5704              | 1 up vs 2            | 1.25556       | 431.491        | 2061.99   | 1        | -2.23327               | 2.0986                 | -3.59267               | 10.3581                | -50.0144               | 1.08986                | 4.00779                | 2.43044                |
| VPS16       | 0.124396          | -31.3112            | 31.3112              | 1 up vs 2            | 3.18863       | 2703.32        | 5086.79   | 1        | -93.7512               | 2.94555                | -6.37125               | -2.62581               | -14.0094               | 1.79857                | 10.167                 | -2.66411               |
| VPS37A      | 0.0425277         | -3.88131            | 3.88131              | 1 up vs 2            | 6.58757       | 118.209        | 107.665   | 1        | -5.18065               | 4.14089                | 2.4087                 | -2.11865               | -11.641                | 1.12366                | 5.19558                | -4.7357                |
| VSIG4       | 0.0776798         | -1.86106            | 1.86106              | 1 up vs 2            | 4.51819       | 279.358        | 370.979   | 1        | 2.2986                 | 6.71258                | 3.70542                | -2.17228               | -4.39544               | -1.20144               | 2.81649                | 9.29851                |
| VSNL1       | 0.147859          | -48.6163            | 48.6163              | 1 up vs 2            | 2.75762       | 7226.13        | 15722.5   | 1        | -161.85                | -6.94922               | -2.70468               | -4.94221               | -15.6944               | 3.01776                | 16.8584                | -3.96624               |
| WBSCR16     | 0.0478745         | -2.39892            | 2.39892              | 1 up vs 2            | 6.14511       | 84.5249        | 82.529    | 1        | -3.84874               | -2.04611               | 2.38352                | -5.96679               | -4.40081               | -3.10697               | 6.58567                | 6.06079                |
| WBSCR27     | 0.959846          | 1.07942             | 1.07942              | 1 up vs 2            | 0.00275462    | 0.231958       | 505.24    | 1        | -2.77367               | -11.713                | -20.3251               | -7.214                 | -4.35381               | 1.19741                | 3.00256                | 5.69429                |
| WDR4        | 0.0814216         | -1.34934            | 1.34934              | 1 up vs 2            | 4.37465       | 457.655        | 627.691   | 1        | -6.94645               | 2.8257                 | 2.11709                | 2.05688                | -22.0298               | 1.28697                | 2.89147                | 4.12885                |
| WDR78       | 0.798748          | -26.0941            | 26.0941              | 1 up vs 2            | 0.0710427     | 45.5032        | 3843.03   | 1        | 2.08234                | 43.9299                | 2.88495                | 6.07665                | 6.07443                | -41.9223               | 4.84824                | -10.6499               |
| WHSC1L1     | 0.0450205         | -2.21655            | 2.21655              | 1 up vs 2            | 6.37245       | 881.614        | 830.086   | 1        | -6.93842               | 2.08617                | 2.43844                | -3.78686               | -34.1025               | -1.79486               | 13.4407                | 17.5364                |
| WTAP        | 0.00620441        | -2.17069            | 2.17069              | 1 up vs 2            | 16.9884       | 81.3677        | 28.7376   | 1        | -6.11705               | 3.71438                | 2.09323                | -2.10805               | -5.30468               | -1.75196               | 3.02701                | 3.30557                |
| XCL2        | 0.856684          | 1.30602             | 1.30602              | 1 up vs 2            | 0.0354605     | 2.9627         | 501.295   | 1        | 13.52                  | 16.2859                | 12.6186                | 5.6308                 | -3.05668               | -3.01312               | -3.06073               | -2.29223               |
| XK          | 0.181975          | -1.82131            | 1.82131              | 1 up vs 2            | 2.2778        | 333.492        | 878.459   | 1        | -18.1913               | 14.6857                | 7.08285                | 2.2948                 | -9.93182               | -3.34853               | 18.2133                | -12.998                |
| XRN1        | 0.666999          | -3.1482             | 3.1482               | 1 up vs 2            | 0.204504      | 177.625        | 5211.4    | 1        | -5.49162               | 3.77021                | 4.30714                | -4.30907               | -12.3596               | 1.00787                | 52.1359                | -49.4894               |
| YWHAB       | 0.0772232         | -4.06356            | 4.06356              | 1 up vs 2            | 4.53635       | 152.644        | 201.895   | 1        | -16.3676               | 3.95591                | 2.36621                | -2.19042               | -3.16455               | 1.2934                 | 6.50324                | -5.20927               |
| ZBTB1       | 0.110474          | -10.7704            | 10.7704              | 1 up vs 2            | 3.5019        | 354.645        | 607.633   | 1        | 30.7722                | -5.19382               | 2.27044                | 9.29502                | -2.31362               | -2.10722               | 2.23915                | -3.05072               |
| ZBTB80S     | 0.00465663        | -1.69539            | 1.69539              | 1 up vs 2            | 19.2045       | 66.3928        | 20.7429   | 1        | -4.60593               | 2.47591                | 2.07859                | -2.36477               | -4.25799               | -1.20352               | 4.45825                | 3.22922                |
| ZDHHC6      | 0.00163717        | -1.87616            | 1.87616              | 1 up vs 2            | 29.3456       | 125.856        | 25.7325   | 1        | -8.40843               | 3.20103                | 2.49836                | -2.64492               | -4.97963               | 1.17918                | 5.1822                 | 2.18196                |
| ZFAT        | 0.0213893         | -5.43758            | 5.43758              | 1 up vs 2            | 9.54778       | 1427.21        | 896.888   | 1        | -42.2386               | 3.64377                | -2.81635               | -9.39795               | -18.2749               | -4.63612               | 7.59987                | 17.6373                |
| ZMAT4       | 0.186684          | -1.51982            | 1.51982              | 1 up vs 2            | 2.22155       | 13615.8        | 36773.6   | 1        | -133.708               | -6.36312               | -3.69797               | -8.40635               | -12.0786               | 3.21425                | 179.569                | -3.63139               |
| ZMYND12     | 0.348392          | -1.22545            | 1.22545              | 1 up vs 2            | 1.0343        | 22.5247        | 130.666   | 1        | -2.45609               | -4.94122               | 2.75579                | 2.73923                | -6.00883               | -1.43065               | 7.28371                | 4.11955                |
| ZNF214      | 0.411789          | 27.6303             | 27.6303              | 1 up vs 2            | 0.777659      | 205.37         | 1584.53   | 1        | -4.85219               | 6.28451                | -5.45236               | 41.4731                | -4.04483               | 1.22336                | 7.31631                | -7.40682               |
| ZNF280D     | 0.0252532         | -3.36792            | 3.36792              | 1 up vs 2            | 8.76698       | 540.697        | 370.046   | 1        | -27.6853               | 5.67806                | 5.9526                 | -4.30069               | -7.29519               | -2.09135               | 5.54846                | 4.35115                |
| ZNF280D     | 0.00457077        | -5.7374             | 5.7374               | 1 up vs 2            | 19.3557       | 297.407        | 92.1919   | 1        | -9.39615               | 3.13187                | 2.47206                | -6.05298               | -16.7259               | -3.08024               | 4.24082                | 2.58207                |
| ZNF346      | 0.00158397        | -1.28327            | 1.28327              | 1 up vs 2            | 29.7275       | 125.913        | 25.4134   | 1        | -4.52704               | 3.15131                | 2.20005                | -2.08998               | -7.20008               | 3.20657                | 6.64812                | 2.73909                |
| ZNF491      | 0.0561374         | -19.4344            | 19.4344              | 1 up vs 2            | 5.57862       | 148.885        | 160.132   | 1        | -15.1124               | 4.72825                | -4.09653               | -7.80462               | -2.50769               | 1.21271                | 4.65708                | -4.32112               |
| ZNF503      | 0.741829          | 3.79232             | 3.79232              | 1 up vs 2            | 0.119061      | 1.53219        | 77.2136   | 1        | 3.19947                | 5.80522                | -3.08398               | 2.79221                | -2.30855               | -1.29309               | 2.74057                | -2.55004               |
| ZNF517      | 0.60841           | 2.20427             | 2.20427              | 1 up vs 2            | 0.291984      | 4.9799         | 102.332   | 1        | -2.20203               | -8.50454               | 2.65524                | -4.55649               | -2.19042               | 1.37232                | -4.60111               | 2.31173                |

| Gene ID | p-value (1 vs. 2) | MeanRatio (1 vs. 2) | FoldChange (1 vs. 2) | FoldChange (1 vs. 2) | F(Gene Group) | SS(Gene Group) | SS(Error) | F(Error) | FoldChange (106 vs. n) | FoldChange (111 vs. n) | FoldChange (112 vs. n) | FoldChange (121 vs. n) | FoldChange (347 vs. n) | FoldChange (353 vs. n) | FoldChange (537 vs. n) | FoldChange (563 vs. n) |
|---------|-------------------|---------------------|----------------------|----------------------|---------------|----------------|-----------|----------|------------------------|------------------------|------------------------|------------------------|------------------------|------------------------|------------------------|------------------------|
| ZNF536  | 0.16037           | 4.09554             | 4.09554              | 1 up vs 2            | 2.56502       | 1146.15        | 2681.02   | 1        | -7.52873               | -8.45167               | -5.52212               | -17.0237               | -73.5807               | -17.5037               | -2.59422               | -5.86325               |
| ZNF536  | 0.926926          | 1.06306             | 1.06306              | 1 up vs 2            | 0.00914568    | 0.360398       | 236.438   | 1        | -7.49244               | -3.39012               | -5.32686               | -2.62738               | -12.0542               | -19.1848               | -2.37511               | -4.48771               |
| ZNF620  | 0.344353          | 3.77956             | 3.77956              | 1 up vs 2            | 1.0532        | 245.48         | 1398.48   | 1        | -32.1907               | 5.73839                | 5.03879                | -2.44367               | -12.0417               | -30.8248               | 2.33822                | -2.87328               |
| ZNF623  | 0.231784          | -1.93999            | 1.93999              | 1 up vs 2            | 1.76938       | 377.55         | 1280.27   | 1        | -9.35812               | 25.1541                | -17.9728               | -5.4967                | -13.2358               | 3.50031                | 19.1421                | -5.69076               |
| ZNF670  | 0.260957          | -1.31559            | 1.31559              | 1 up vs 2            | 1.53985       | 118.105        | 460.193   | 1        | -3.17676               | 18.3358                | -7.20375               | -2.43589               | -7.91472               | -1.88348               | 10.2093                | -2.32066               |
| ZNF772  | 0.025315          | -1.33139            | 1.33139              | 1 up vs 2            | 8.75581       | 89.7179        | 61.48     | 1        | -5.7144                | 3.02093                | -2.19322               | -3.2752                | -2.86126               | 1.88744                | 8.2732                 | 3.8469                 |
| ZNF816A | 0.0164027         | -1.14465            | 1.14465              | 1 up vs 2            | 10.8917       | 147.618        | 81.3198   | 1        | -7.95259               | 8.98591                | 2.14843                | -2.40701               | -3.84755               | -1.25273               | 6.99013                | 3.81457                |
| ZYG11A  | 0.0822376         | -4.44233            | 4.44233              | 1 up vs 2            | 4.34455       | 78.2396        | 108.052   | 1        | -9.52791               | -2.89747               | 2.1781                 | -4.23857               | -2.05182               | 1.62585                | -2.83013               | 7.85834                |
