# Supplementary material
Source: PubMed Central journal article supplement (PMC4028366)
Supplement: NIHMS545812-supplement-401_2013_1218_MOESM16_ESM.pdf [file NIHMS545812-supplement-401_2013_1218_MOESM16_ESM.pdf]

**File:** ESM\_14 (Online Resource 14)

**Manuscript Title:** Comparative Multidimensional Molecular Analyses of Pediatric Diffuse Intrinsic Pontine Glioma Reveals Distinct Molecular

**Journal:** Acta Neuropathologica

**Authors:** Amanda M. Saratsis, Madhuri Kambhampati, Kendall Snyder, Sridevi Yadavilli , Joe Devaney, Brennan Harmon, Jordan Hall, Eric H. Raabe, Ping An, Melanie Weingart, Brian Rood, Suresh Magge, Roger J. Packer, Javad Nazarian

**Corresponding Author:**

Javad Nazarian, Children's National Medical Center, Center for Genetic Medicine  
111 Michigan Ave., NW, Washington DC, 20010  
Phone: 202-476-6022  
Fax: 202-476-6014  
Email: JNazarian@CNMC.org

## Online Resource 14

| Subgroup 1                                                                                                                                                                                                                                                                                                                                                                                                                                                                                                                                                                                                                                                                                                                                                                                                           |
|----------------------------------------------------------------------------------------------------------------------------------------------------------------------------------------------------------------------------------------------------------------------------------------------------------------------------------------------------------------------------------------------------------------------------------------------------------------------------------------------------------------------------------------------------------------------------------------------------------------------------------------------------------------------------------------------------------------------------------------------------------------------------------------------------------------------|
| <i>Gene (Average Fold Change in Expression Value, Tumor / Normal)</i>                                                                                                                                                                                                                                                                                                                                                                                                                                                                                                                                                                                                                                                                                                                                                |
| <i>ADARBI (14.79); AKAP12 (6.64); ARL6IP1 (1.68); BCKDHB (1.36); BDNF (6.68); BIRC5 (13.49); BUB1B (-1.92); CANX (3.51); CD44 (22.45); CDC42 (2.74); CDC25C (17.14); CDK1 (132.70); CLPB (16.35); COL1A2 (22.00); COL6A3 (23.07); CPD (1.81); CPT1A (18.53); CXCL10 (4.16); DBI (4.95); DKK1 (5.83); DLEU (5.93); DUSP6 (87.43); EMP1 (8.33); ERAP1 (4.25); FBLN2 11.63); FGF5 (-13.17); GAS1 (8.14); GHI (42.02); HIST1H4A (4.17); HK2 (30.97); HMOX1 (4.31); IER3 (4.78); IRF7 (122.33); ITGA3 (12.12); ITGB1 (4.37); KRT17 (-2.28); LIMS1 (5.56); MKI67 (10.77); MYCN (7.93); MYO1B (7.73); NPPA (9.62); NPY (-194.37); PAM (11.60); PKLR (2.74); PMAIP1 (5.31); POLR3D (8.47); PSMB8 (2.17); PTPRC (4.09); RRM2B (1.45); SHMT1 (5.61); STMN1 (4.01); TLE4 (-9.09); TNC (13.30); VCAM1 (43.26); VEGFA (21.93)</i> |
| Subgroup 2                                                                                                                                                                                                                                                                                                                                                                                                                                                                                                                                                                                                                                                                                                                                                                                                           |
| <i>Gene (Average Fold Change in Expression Value, Tumor / Normal)</i>                                                                                                                                                                                                                                                                                                                                                                                                                                                                                                                                                                                                                                                                                                                                                |
| <i>CDH (3.34); DKK1 (5.83); ELAVL2 (989.51); GLI (9.43); GREM (-1.91); JUP (1.34); LZTS1 (8.88); MAPK11 (2.82); PCDH18 (7.30); PDZRN3 (11.58); PTCH1 (5.15); RGS10 (2.65); RNASEL (4.18); SCD5 (-1.15); SH2B3 (3.01); SMO (27.99); SOX18 4.37); TNC (13.23); VEGFA (21.93)</i>                                                                                                                                                                                                                                                                                                                                                                                                                                                                                                                                       |
