# Supplementary material
Source: PubMed Central journal article supplement (PMC4028366)

**File:** ESM\_15 (Online Resource 15)

**Manuscript Title:** Comparative Multidimensional Molecular Analyses of Pediatric Diffuse Intrinsic Pontine Glioma Reveals Distinct Molecular

**Journal:** Acta Neuropathologica

**Authors:** Amanda M. Saratsis, Madhuri Kambhampati, Kendall Snyder, Sridevi Yadavilli , Joe Devaney, Brennan Harmon, Jordan Hall, Eric H. Raabe, Ping An, Melanie Weingart, Brian Rood, Suresh Magge, Roger J. Packer, Javad Nazarian

**Corresponding Author:**

Javad Nazarian, Children's National Medical Center, Center for Genetic Medicine  
111 Michigan Ave., NW, Washington DC, 20010  
Phone: 202-476-6022  
Fax: 202-476-6014  
Email: JNazarian@CNMC.org

Online Resource 15

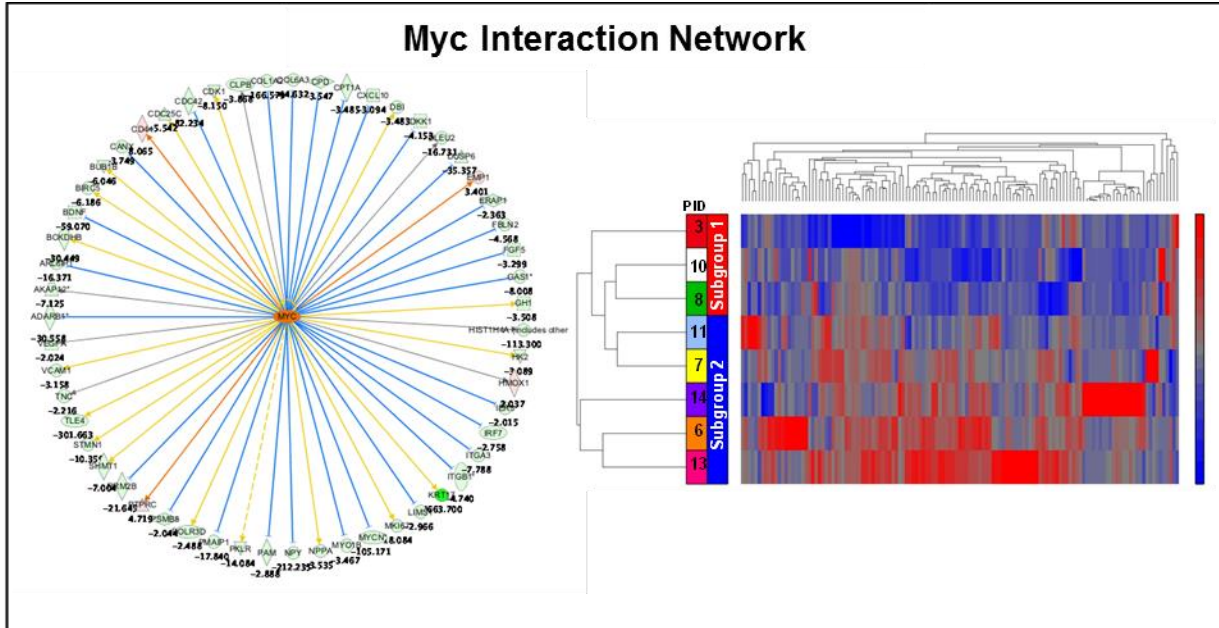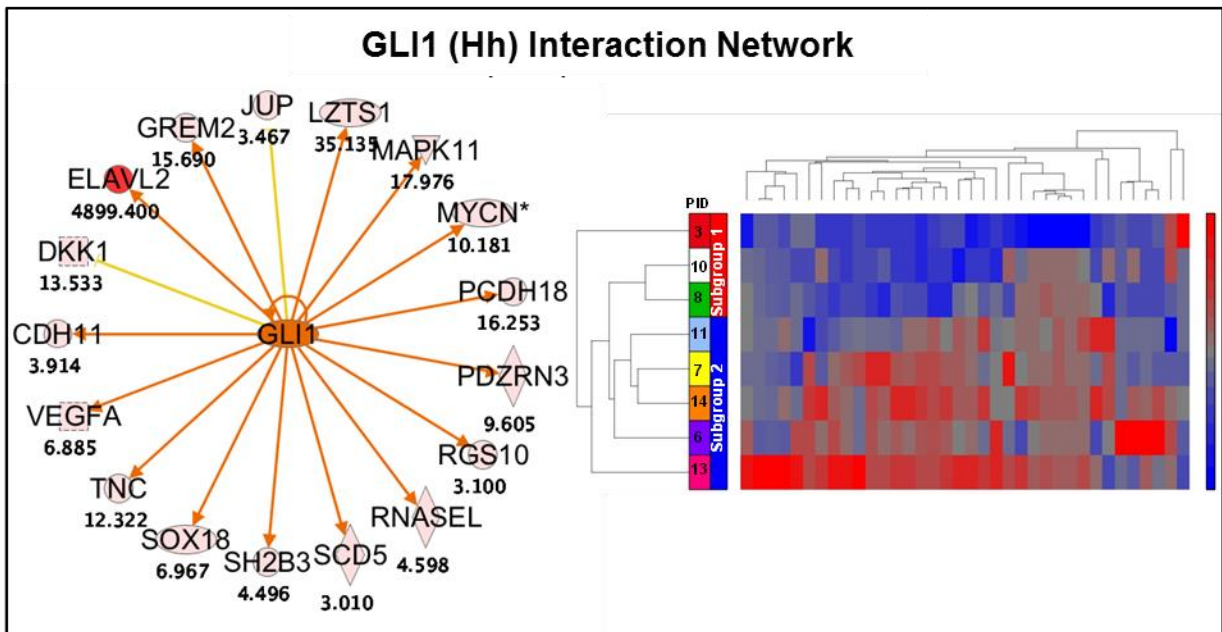

Online Resource 15 (cont)

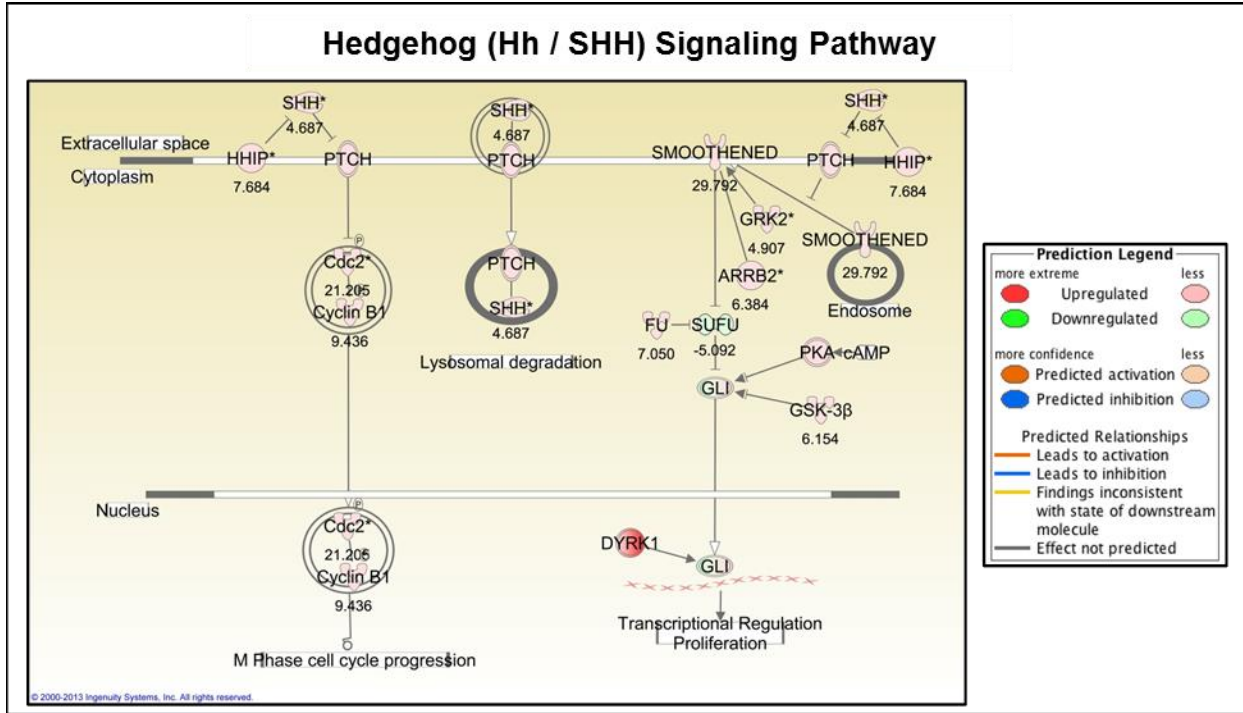

Supplement: NIHMS545812-supplement-401_2013_1218_MOESM17_ESM.pdf [file NIHMS545812-supplement-401_2013_1218_MOESM17_ESM.pdf]
