# Supplementary material
Source: PubMed Central journal article supplement (PMC4028366)

**File: ESM\_18 (Online Resource 18)**

**Manuscript Title:** Comparative Multidimensional Molecular Analyses of Pediatric Diffuse Intrinsic Pontine Glioma Reveals Distinct Molecular

**Journal:** Acta Neuropathologica

**Authors:** Amanda M. Saratsis, Madhuri Kambhampati, Kendall Snyder, Sridevi Yadavilli , Joe Devaney, Brennan Harmon, Jordan Hall, Eric H. Raabe, Ping An, Melanie Weingart, Brian Rood, Suresh Magge, Roger J. Packer, Javad Nazarian

**Corresponding Author:**

Javad Nazarian, Children's National Medical Center, Center for Genetic Medicine  
111 Michigan Ave., NW, Washington DC, 20010

Phone: 202-476-6022

Fax: 202-476-6014

Email: [JNazarian@CNMC.org](mailto:JNazarian@CNMC.org)

Online Resource 18

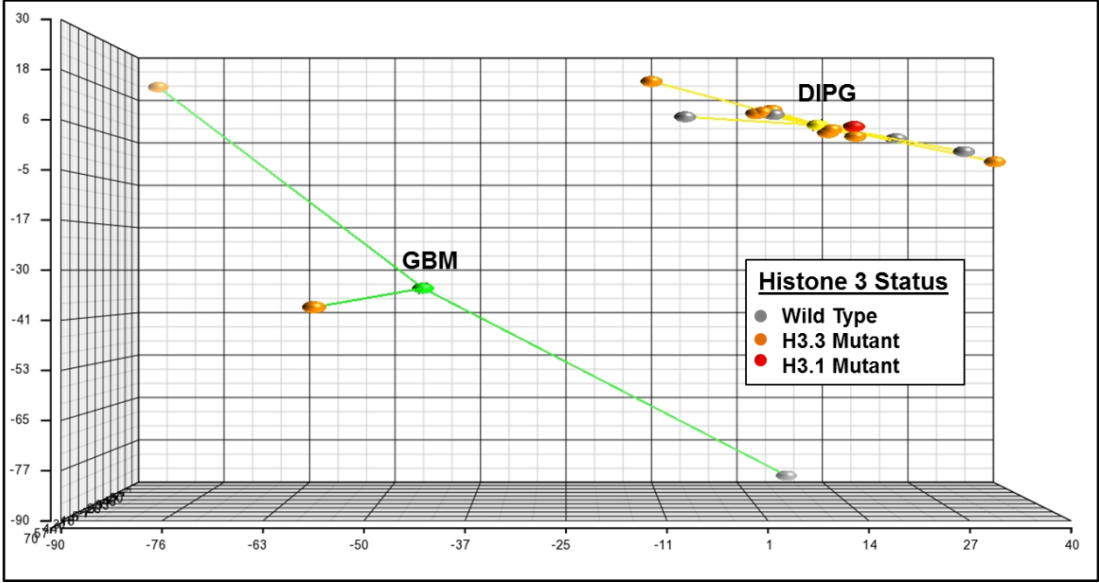

Supplement: NIHMS545812-supplement-401_2013_1218_MOESM20_ESM.pdf [file NIHMS545812-supplement-401_2013_1218_MOESM20_ESM.pdf]
