# Supplementary material
Source: PubMed Central journal article supplement (PMC4028366)
Supplement: NIHMS545812-supplement-401_2013_1218_MOESM24_ESM.pdf [file NIHMS545812-supplement-401_2013_1218_MOESM24_ESM.pdf]

**Manuscript Title:** Comparative Multidimensional Molecular Analyses of Pediatric Diffuse Intrinsic Pontine Glioma Reveals Distinct Molecular Subtypes  
**Journal:** Acta Neuropathologica

**Authors:** Amanda M. Saratsis, Madhuri Kambhampati, Kendall Snyder, Sridevi Yadavilli, Joe Devaney, Brennan Harmon, Jordan Hall, Eric H. Raabe, Ping An, Melanie Weingart, Brian Rood, Suresh Magge, Roger J. Packer, Javad Nazarian

**Corresponding Author:**

Javad Nazarian  
 Children's National Medical Center, Center for Genetic Medicine  
 111 Michigan Ave., NW, Washington DC, 20010  
 Phone: 202-476-6022 Fax: 202-476-6014  
 Email: JNazarian@CNMC.org

| Probeset ID | UCSC_REFGENE_NAME                            | p-value<br>(Type) | p-value (T vs.<br>N) | Ratio (T<br>vs. N) | Fold-<br>Change (T<br>vs. N) | Fold-Change (T vs.<br>N) (Description) | F(Type) | SS (Type) | SS (Error) | F (Error) |
|-------------|----------------------------------------------|-------------------|----------------------|--------------------|------------------------------|----------------------------------------|---------|-----------|------------|-----------|
| cg00000292  | ATP2A1;ATP2A1                                | 8.21E-06          | 8.21E-06             | 0.268182           | -3.72881                     | T down vs N                            | 41.437  | 16.2231   | 6.26419    | 1         |
| cg00001364  | PROX1                                        | 1.41E-05          | 1.41E-05             | 0.215181           | -4.64725                     | T down vs N                            | 37.768  | 22.1055   | 9.36466    | 1         |
| cg00002033  | LRFN1                                        | 0.00121546        | 0.00121546           | 4.70506            | 4.70506                      | T up vs N                              | 15.384  | 22.4627   | 23.3621    | 1         |
| cg00002646  | S100A5                                       | 1.02E-05          | 1.02E-05             | 0.295752           | -3.38121                     | T down vs N                            | 39.923  | 13.9003   | 5.5708     | 1         |
| cg00003287  | TNNT2;TNNT2;TNNT2;TNNT2                      | 0.00236174        | 0.00236174           | 3.84451            | 3.84451                      | T up vs N                              | 13.014  | 16.9851   | 20.8827    | 1         |
| cg00003529  | C3orf16                                      | 0.00015571        | 0.000155706          | 0.296668           | -3.37078                     | T down vs N                            | 24.148  | 13.8298   | 9.16344    | 1         |
| cg00003965  | RETNLB                                       | 0.00259919        | 0.00259919           | 0.252511           | -3.96022                     | T down vs N                            | 12.689  | 17.7414   | 22.3715    | 1         |
| cg00005166  | OR1F2P                                       | 7.80E-06          | 7.80E-06             | 0.290809           | -3.43868                     | T down vs N                            | 41.805  | 14.2875   | 5.46826    | 1         |
| cg00005215  | SERPINB12                                    | 0.00021065        | 0.000210651          | 0.170054           | -5.88048                     | T down vs N                            | 22.71   | 29.3976   | 20.7118    | 1         |
| cg00005847  | HOXD3                                        | 0.00080737        | 0.000807367          | 12.7789            | 12.7789                      | T up vs N                              | 16.949  | 60.798    | 57.3932    | 1         |
| cg00006198  | TDRD10;TDRD10                                | 7.61E-05          | 7.61E-05             | 0.217329           | -4.60131                     | T down vs N                            | 27.782  | 21.8205   | 12.5666    | 1         |
| cg00006243  | OTOF                                         | 0.00013849        | 0.000138489          | 6.30538            | 6.30538                      | T up vs N                              | 24.72   | 31.7585   | 20.5553    | 1         |
| cg00007064  | LHX6;LHX6                                    | 8.46E-06          | 8.46E-06             | 0.162207           | -6.16497                     | T down vs N                            | 41.228  | 30.9864   | 12.0254    | 1         |
| cg00007076  | RRS1;RRS1                                    | 0.00020379        | 0.000203788          | 0.318361           | -3.14108                     | T down vs N                            | 22.865  | 12.27     | 8.58613    | 1         |
| cg00007987  | ZNF581                                       | 0.00384134        | 0.00384134           | 0.283564           | -3.52654                     | T down vs N                            | 11.405  | 14.8772   | 20.8715    | 1         |
| cg00008629  | ROD1;ROD1;ROD1                               | 1.46E-06          | 1.46E-06             | 0.099098           | -10.091                      | T down vs N                            | 55.005  | 50.05     | 14.5587    | 1         |
| cg00009750  | CDK15                                        | 0.00070935        | 0.000709352          | 0.292549           | -3.41823                     | T down vs N                            | 17.462  | 14.1499   | 12.9653    | 1         |
| cg00011225  | WNT6                                         | 0.00010869        | 0.000108691          | 6.23911            | 6.23911                      | T up vs N                              | 25.932  | 31.3951   | 19.371     | 1         |
| cg00011459  | TMEM186;PMM2                                 | 0.00011285        | 0.00011285           | 0.164721           | -6.07086                     | T down vs N                            | 25.741  | 30.4645   | 18.9357    | 1         |
| cg00011924  | RNF222                                       | 1.04E-05          | 1.04E-05             | 0.094773           | -10.5515                     | T down vs N                            | 39.8    | 52.0011   | 20.9052    | 1         |
| cg00011994  | FLOT1;IER3                                   | 0.00188092        | 0.00188092           | 5.64989            | 5.64989                      | T up vs N                              | 13.803  | 28.085    | 32.5555    | 1         |
| cg00013655  | PIGQ;PIGQ                                    | 0.00274027        | 0.00274027           | 3.55936            | 3.55936                      | T up vs N                              | 12.511  | 15.0967   | 19.3068    | 1         |
| cg00014998  | HOXD4;MIR10B                                 | 0.00016393        | 0.000163932          | 13.937             | 13.937                       | T up vs N                              | 23.899  | 65.009    | 43.5226    | 1         |
| cg00016127  | OR8U8;OR5M11                                 | 1.58E-05          | 1.58E-05             | 0.153668           | -6.50752                     | T down vs N                            | 37.021  | 32.8563   | 14.2002    | 1         |
| cg00016255  | AARSD1;AARSD1;RUNC1;AARSD1                   | 7.82E-06          | 7.82E-06             | 0.299866           | -3.33482                     | T down vs N                            | 41.787  | 13.5868   | 5.20236    | 1         |
| cg00016913  | PIPOX                                        | 0.00039426        | 0.000394264          | 0.254094           | -3.93555                     | T down vs N                            | 19.899  | 17.5806   | 14.1361    | 1         |
| cg00017461  | OSM                                          | 7.09E-05          | 7.09E-05             | 0.259593           | -3.85218                     | T down vs N                            | 28.159  | 17.0355   | 9.6796     | 1         |
| cg00017546  | MED18;MED18                                  | 2.93E-05          | 2.93E-05             | 0.253096           | -3.95107                     | T down vs N                            | 33.179  | 17.6818   | 8.52685    | 1         |
| cg00017639  | SLC28A1;SLC28A1                              | 5.36E-05          | 5.36E-05             | 0.212              | -4.71699                     | T down vs N                            | 29.689  | 22.5362   | 12.1454    | 1         |
| cg00018128  | TBR1                                         | 0.00536592        | 0.00536592           | 0.274302           | -3.64562                     | T down vs N                            | 10.358  | 15.6716   | 24.2074    | 1         |
| cg00018229  | TTC13;ARV1;TTC13                             | 2.72E-05          | 2.72E-05             | 0.266702           | -3.7495                      | T down vs N                            | 33.624  | 16.3597   | 7.78491    | 1         |
| cg00019877  | LOC169834                                    | 0.00124899        | 0.00124899           | 0.311228           | -3.21308                     | T down vs N                            | 15.283  | 12.7607   | 13.3595    | 1         |
| cg00020991  | CBR4                                         | 0.00053292        | 0.00053292           | 0.329472           | -3.03516                     | T down vs N                            | 18.625  | 11.5455   | 9.91807    | 1         |
| cg00021855  | PYCRL                                        | 0.00016309        | 0.000163086          | 0.331724           | -3.01455                     | T down vs N                            | 23.924  | 11.4043   | 7.62704    | 1         |
| cg00022688  | ACSL5;ACSL5;ACSL5;ACSL5                      | 7.93E-06          | 7.93E-06             | 0.307194           | -3.25527                     | T down vs N                            | 41.68   | 13.0475   | 5.00862    | 1         |
| cg00023024  | HTR1D                                        | 0.00033118        | 0.000331177          | 0.254339           | -3.93176                     | T down vs N                            | 20.658  | 17.5559   | 13.5972    | 1         |
| cg00023919  | RHOD                                         | 4.62E-05          | 4.62E-05             | 5.4989             | 5.4989                       | T up vs N                              | 30.516  | 27.2132   | 14.2682    | 1         |
| cg00025044  | ERCC6                                        | 0.000698          | 0.000698             | 0.307341           | -3.25371                     | T down vs N                            | 17.526  | 13.0369   | 11.9016    | 1         |
| cg00025357  | PADI3                                        | 7.91E-06          | 7.91E-06             | 0.134356           | -7.44292                     | T down vs N                            | 41.704  | 37.7373   | 14.4783    | 1         |
| cg00027995  | THBS1                                        | 0.00013407        | 0.000134071          | 0.300816           | -3.32429                     | T down vs N                            | 24.88   | 13.5155   | 8.69156    | 1         |
| cg00029825  | SLC5A2                                       | 3.43E-06          | 3.43E-06             | 3.94224            | 3.94224                      | T up vs N                              | 47.92   | 17.6242   | 5.88452    | 1         |
| cg00031256  | SERPINB1                                     | 0.0001414         | 0.000141395          | 8.49018            | 8.49018                      | T up vs N                              | 24.618  | 42.8496   | 27.849     | 1         |
| cg00031556  | PRB1;PRB1;PRB1                               | 0.00053123        | 0.000531234          | 0.199085           | -5.02297                     | T down vs N                            | 18.639  | 24.3995   | 20.9454    | 1         |
| cg00032609  | ATP5E;ATP5E                                  | 1.24E-05          | 1.24E-05             | 0.22788            | -4.38827                     | T down vs N                            | 38.604  | 20.4861   | 8.49069    | 1         |
| cg00034101  | HEYL<br>KRIT1;KRIT1;KRIT1;KRIT1;ANKIB1;KRIT1 | 4.38E-05          | 4.38E-05             | 4.29134            | 4.29134                      | T up vs N                              | 30.82   | 19.872    | 10.3164    | 1         |
| cg00035937  | 1                                            | 2.41E-05          | 2.41E-05             | 0.289862           | -3.44992                     | T down vs N                            | 34.346  | 14.3631   | 6.69109    | 1         |
| cg00036347  | LOC100132111;C2CD4D                          | 0.00011054        | 0.000110541          | 5.02904            | 5.02904                      | T up vs N                              | 25.846  | 24.436    | 15.1271    | 1         |
| cg00037400  | CPNE7;CPNE7                                  | 0.00010864        | 0.000108636          | 4.13157            | 4.13157                      | T up vs N                              | 25.934  | 18.8502   | 11.6296    | 1         |
| cg00038736  | GGN                                          | 0.00020118        | 0.000201181          | 3.10336            | 3.10336                      | T up vs N                              | 22.925  | 12.0123   | 8.38368    | 1         |
| cg00039864  | COL23A1                                      | 0.00049553        | 0.000495531          | 0.270896           | -3.69145                     | T down vs N                            | 18.928  | 15.9757   | 13.5042    | 1         |
| cg00040419  | TCEANC                                       | 0.00016183        | 0.000161834          | 0.15875            | -6.2992                      | T down vs N                            | 23.961  | 31.7246   | 21.1841    | 1         |
| cg00040427  | PODNL1;PODNL1;PODNL1                         | 4.23E-06          | 4.23E-06             | 0.218086           | -4.58535                     | T down vs N                            | 49.109  | 20.4435   | 6.24438    | 1         |
| cg00042208  | BOD1;BOD1                                    | 5.56E-05          | 5.56E-05             | 0.248006           | -4.03216                     | T down vs N                            | 29.482  | 18.2086   | 9.88201    | 1         |
| cg00043076  | ACOX3;ACOX3                                  | 0.00172743        | 0.00172743           | 0.279292           | -3.58048                     | T down vs N                            | 14.104  | 15.2377   | 17.286     | 1         |
| cg00044299  | KCTD1;KCTD1;KCTD1                            | 0.00017734        | 0.000177337          | 0.273455           | -3.65691                     | T down vs N                            | 23.522  | 15.7465   | 10.711     | 1         |
| cg00045227  | OR8U8;OR9G9;OR9G1                            | 0.00028799        | 0.000287989          | 0.321897           | -3.10659                     | T down vs N                            | 21.279  | 12.0344   | 9.04872    | 1         |
| cg00047532  | PTCRA                                        | 7.33E-06          | 7.33E-06             | 0.263085           | -3.80105                     | T down vs N                            | 42.241  | 16.6996   | 6.32542    | 1         |

| Probeset ID                        | UCSC_REFGENE_NAME            | p-value<br>(Type) | p-value (T vs.<br>N) | Ratio (T<br>vs. N) | Fold-<br>Change (T<br>vs. N) | Fold-Change (T vs.<br>N) (Description) | F(Type) | SS (Type) | SS (Error) | F (Error) |
|------------------------------------|------------------------------|-------------------|----------------------|--------------------|------------------------------|----------------------------------------|---------|-----------|------------|-----------|
| cg00048697                         | PDCL2                        | 0.00022451        | 0.000224509          | 0.308928           | -3.237                       | T down vs N                            | 22.414  | 12.9234   | 9.22534    | 1         |
| cg00049664                         | CMTM2                        | 1.25E-05          | 1.25E-05             | 4.72116            | 4.72116                      | T up vs N                              | 38.558  | 22.5619   | 9.36219    | 1         |
| cg00051483                         | GIMAP7                       | 3.41E-05          | 3.41E-05             | 0.251811           | -3.97123                     | T down vs N                            | 32.266  | 17.8131   | 8.83313    | 1         |
| cg00051662                         | CYP2C19                      | 1.11E-06          | 1.11E-06             | 0.158596           | -6.30535                     | T down vs N                            | 57.405  | 31.7583   | 8.85168    | 1         |
| cg00052903                         | PRB3                         | 2.92E-05          | 2.92E-05             | 0.209666           | -4.76949                     | T down vs N                            | 33.194  | 22.859    | 11.0183    | 1         |
| cg00054210                         | CYP7B1                       | 0.00024074        | 0.000240735          | 4.06541            | 4.06541                      | T up vs N                              | 22.092  | 18.4237   | 13.3431    | 1         |
| cg00054525                         | CYBA                         | 4.81E-05          | 4.81E-05             | 4.92596            | 4.92596                      | T up vs N                              | 30.288  | 23.8134   | 12.5797    | 1         |
| cg00054741                         | MIR523                       | 2.01E-05          | 2.01E-05             | 0.161195           | -6.20368                     | T down vs N                            | 35.477  | 31.2      | 14.0709    | 1         |
| cg00055292                         | RADIL                        | 2.21E-05          | 2.21E-05             | 0.295816           | -3.38048                     | T down vs N                            | 34.889  | 13.8953   | 6.37245    | 1         |
| cg00055434                         | PLCH2                        | 8.06E-05          | 8.06E-05             | 0.315597           | -3.1686                      | T down vs N                            | 27.479  | 12.4577   | 7.25374    | 1         |
| cg00055462                         | FARP1                        | 0.00114993        | 0.00114993           | 0.321492           | -3.11049                     | T down vs N                            | 15.591  | 12.0611   | 12.3773    | 1         |
| cg00057240                         | TMEM194B                     | 0.00011247        | 0.000112468          | 0.270725           | -3.69378                     | T down vs N                            | 25.759  | 15.9912   | 9.93297    | 1         |
| cg00057272                         | ZFAT                         | 6.76E-06          | 6.76E-06             | 0.220189           | -4.54156                     | T down vs N                            | 42.819  | 21.4484   | 8.01455    | 1         |
| cg00058449                         | ZBTB12                       | 0.00550864        | 0.00550864           | 0.299596           | -3.33783                     | T down vs N                            | 10.278  | 13.6072   | 21.1826    | 1         |
| cg00061306                         | FBF1                         | 1.97E-05          | 1.97E-05             | 0.182406           | -5.48227                     | T down vs N                            | 35.61   | 27.1166   | 12.1838    | 1         |
| cg00063346                         | OBSCN;OBSCN                  | 0.00121124        | 0.00121124           | 0.285914           | -3.49756                     | T down vs N                            | 15.397  | 14.683    | 15.2581    | 1         |
| cg00064255                         | LRRRC8C                      | 0.0036195         | 0.0036195            | 0.146442           | -6.82864                     | T down vs N                            | 12.537  | 27.6543   | 28.6747    | 1         |
| cg00066270                         | PRG4;PRG4;PRG4;PRG4;MIR548F1 | 8.28E-06          | 8.28E-06             | 0.163417           | -6.11933                     | T down vs N                            | 41.383  | 30.7338   | 11.8826    | 1         |
| cg00066748                         | C8orf42                      | 0.00116312        | 0.00116312           | 0.313504           | -3.18976                     | T down vs N                            | 15.549  | 12.6019   | 12.9679    | 1         |
| cg00067124                         | METTL6                       | 0.00201124        | 0.00201124           | 0.292321           | -3.42089                     | T down vs N                            | 13.568  | 14.1678   | 16.7071    | 1         |
| cg00067528                         | ATP6V1B1                     | 0.00209797        | 0.00209797           | 0.294183           | -3.39924                     | T down vs N                            | 13.421  | 14.0219   | 16.7159    | 1         |
| cg00067720                         | PIK3R1                       | 6.91E-06          | 6.91E-06             | 0.211462           | -4.72899                     | T down vs N                            | 42.669  | 22.6101   | 8.4783     | 1         |
| cg00069242                         | JUB                          | 0.0071681         | 0.0071681            | 5.33901            | 5.33901                      | T up vs N                              | 9.4889  | 26.2792   | 44.3116    | 1         |
| cg00071984                         | FHIT;FHIT                    | 0.00010656        | 0.00010656           | 0.201585           | -4.96069                     | T down vs N                            | 27.101  | 22.6105   | 12.5148    | 1         |
| cg00072587                         | MAP3K15                      | 1.33E-06          | 1.33E-06             | 0.235037           | -4.25464                     | T down vs N                            | 55.813  | 19.6384   | 5.62979    | 1         |
| cg00072711                         | C9orf24;C9orf24;C9orf24      | 8.85E-06          | 8.85E-06             | 19.5285            | 19.5285                      | T up vs N                              | 40.917  | 82.7223   | 32.3477    | 1         |
| cg00073384                         | OR2M2                        | 7.99E-05          | 7.99E-05             | 0.20917            | -4.7808                      | T down vs N                            | 27.522  | 22.9283   | 13.3293    | 1         |
| cg00074086                         | PAPOLB;RADIL                 | 0.00058838        | 0.000588379          | 3.56484            | 3.56484                      | T up vs N                              | 18.218  | 15.1333   | 13.291     | 1         |
| cg00074746                         | FAM26F                       | 4.23E-05          | 4.23E-05             | 0.322448           | -3.10127                     | T down vs N                            | 31.023  | 11.998    | 6.18793    | 1         |
| cg00075920                         | B4GALT7                      | 9.51E-05          | 9.51E-05             | 0.222607           | -4.49223                     | T down vs N                            | 26.617  | 21.1399   | 12.7079    | 1         |
| SLFN11;SLFN11;SLFN11;SLFN11;SLFN11 |                              |                   |                      |                    |                              |                                        |         |           |            |           |
| cg00080081                         | 1                            | 0.0010163         | 0.0010163            | 0.299789           | -3.33568                     | T down vs N                            | 16.059  | 13.5926   | 13.5431    | 1         |
| cg00082939                         | C10orf41;C10orf41            | 9.36E-06          | 9.36E-06             | 6.59437            | 6.59437                      | T up vs N                              | 40.528  | 33.323    | 13.1554    | 1         |
| cg00083659                         | C22orf33;C22orf33            | 0.00018092        | 0.000180917          | 0.256024           | -3.90588                     | T down vs N                            | 23.427  | 17.387    | 11.8749    | 1         |
| STAU2;STAU2;STAU2;STAU2;STAU2;S    |                              |                   |                      |                    |                              |                                        |         |           |            |           |
| cg00085416                         | TAU2;STAU2                   | 2.58E-05          | 2.58E-05             | 3.4606             | 3.4606                       | T up vs N                              | 33.947  | 14.4349   | 6.80356    | 1         |
| cg00085448                         | OAS2;OAS2;OAS2               | 3.18E-07          | 3.18E-07             | 0.325333           | -3.07377                     | T down vs N                            | 69.693  | 11.8099   | 2.71131    | 1         |
| cg00086113                         | PTPN9                        | 0.00026997        | 0.000269965          | 0.253545           | -3.94408                     | T down vs N                            | 21.57   | 17.6362   | 13.0819    | 1         |
| cg00087425                         | IL6;IL6                      | 3.69E-07          | 3.69E-07             | 0.147988           | -6.7573                      | T down vs N                            | 68.123  | 34.191    | 8.03045    | 1         |
| cg00088691                         | SNX29                        | 0.00084172        | 0.000841716          | 0.124136           | -8.0557                      | T down vs N                            | 16.786  | 40.7707   | 38.8617    | 1         |
| cg00089945                         | MIA3                         | 2.40E-05          | 2.40E-05             | 0.122368           | -8.17207                     | T down vs N                            | 34.393  | 41.3332   | 19.2286    | 1         |
| cg00090787                         | RPL4;SNORD16;SNORD18B        | 4.35E-05          | 4.35E-05             | 0.227226           | -4.4009                      | T down vs N                            | 30.862  | 20.5658   | 10.6621    | 1         |
| cg00091004                         | PRELP;PRELP                  | 0.00018861        | 0.000188613          | 0.233886           | -4.27559                     | T down vs N                            | 23.229  | 19.7718   | 13.6186    | 1         |
| cg00091693                         | KRT20                        | 5.55E-06          | 5.55E-06             | 0.311214           | -3.21322                     | T down vs N                            | 44.258  | 12.7617   | 4.61354    | 1         |
| cg00092518                         | PHF11;PHF11;PHF11            | 0.00237676        | 0.00237676           | 7.10499            | 7.10499                      | T up vs N                              | 12.992  | 36.0103   | 44.3475    | 1         |
| cg00097038                         | CRB1                         | 0.00370288        | 0.00370288           | 0.282599           | -3.53858                     | T down vs N                            | 11.523  | 14.9578   | 20.7699    | 1         |
| cg00098799                         | IGF1R                        | 0.00035133        | 0.000351331          | 0.165254           | -6.05131                     | T down vs N                            | 20.399  | 30.3556   | 23.8095    | 1         |
| cg00099766                         | RRAGD                        | 0.00393367        | 0.00393367           | 0.298542           | -3.34962                     | T down vs N                            | 11.329  | 13.6868   | 19.3302    | 1         |
| cg00100703                         | UNC45B;UNC45B                | 0.00036625        | 0.000366247          | 0.305169           | -3.27687                     | T down vs N                            | 20.218  | 13.1942   | 10.4417    | 1         |
| cg00101104                         | MIR521-2                     | 0.00010504        | 0.000105036          | 0.244955           | -4.08238                     | T down vs N                            | 26.106  | 18.5333   | 11.359     | 1         |
| cg00101602                         | ASCC1                        | 9.50E-06          | 9.50E-06             | 0.173028           | -5.77941                     | T down vs N                            | 40.422  | 28.8251   | 11.4098    | 1         |
| cg00114966                         | LHX9;LHX9                    | 1.62E-07          | 1.62E-07             | 0.255546           | -3.91319                     | T down vs N                            | 77.118  | 17.4347   | 3.61724    | 1         |
| cg00115178                         | CAMK1D;CAMK1D                | 0.00014544        | 0.00014544           | 0.181292           | -5.51596                     | T down vs N                            | 24.48   | 27.3122   | 17.8511    | 1         |
| cg00115458                         | COL11A2;COL11A2;COL11A2      | 0.00018456        | 0.000184562          | 0.220553           | -4.53407                     | T down vs N                            | 23.332  | 21.4016   | 14.6761    | 1         |
| cg00115567                         | AARS2                        | 3.33E-06          | 3.33E-06             | 0.264402           | -3.78213                     | T down vs N                            | 48.17   | 16.5749   | 5.50544    | 1         |
| cg00116315                         | TULP1;TEAD3                  | 0.00049016        | 0.000490159          | 3.49178            | 3.49178                      | T up vs N                              | 18.974  | 14.6443   | 12.349     | 1         |
| cg00117005                         | DAXX;DAXX;DAXX;DAXX          | 9.77E-06          | 9.77E-06             | 0.228836           | -4.36995                     | T down vs N                            | 40.23   | 20.3704   | 8.1016     | 1         |
| cg00117914                         | TTL8                         | 1.53E-05          | 1.53E-05             | 0.319223           | -3.1326                      | T down vs N                            | 37.229  | 12.2121   | 5.24846    | 1         |
| cg00118712                         | EBF3                         | 9.63E-05          | 9.63E-05             | 0.147017           | -6.80194                     | T down vs N                            | 26.55   | 34.4271   | 20.7473    | 1         |
| cg00118989                         | TRPC7;TRPC7;TRPC7            | 0.00098107        | 0.00098107           | 0.311049           | -3.21492                     | T down vs N                            | 16.193  | 12.7732   | 12.6208    | 1         |
| cg00119186                         | OR6K2                        | 7.45E-06          | 7.45E-06             | 0.161587           | -6.18863                     | T down vs N                            | 42.127  | 31.1171   | 11.8185    | 1         |
| cg00124993                         | MIR886                       | 0.00110135        | 0.00110135           | 3.03936            | 3.03936                      | T up vs N                              | 15.754  | 11.5743   | 11.7553    | 1         |
| cg00126498                         | ULBP1                        | 7.34E-05          | 7.34E-05             | 0.233948           | -4.27445                     | T down vs N                            | 27.974  | 19.7645   | 11.3046    | 1         |
| cg00126638                         | HLA-G                        | 1.97E-05          | 1.97E-05             | 6.54275            | 6.54275                      | T up vs N                              | 35.624  | 33.046    | 14.842     | 1         |
| cg00130808                         | LOC145845                    | 0.00383035        | 0.00383035           | 0.173529           | -5.76272                     | T down vs N                            | 11.414  | 28.7301   | 40.2735    | 1         |
| cg00132141                         | CTNNA3                       | 0.00497497        | 0.00497497           | 0.329912           | -3.03111                     | T down vs N                            | 10.591  | 11.5178   | 17.4002    | 1         |
| cg00133204                         | IPO5                         | 0.00028279        | 0.000282787          | 0.313544           | -3.18934                     | T down vs N                            | 21.361  | 12.5991   | 9.43703    | 1         |
| cg00133624                         | EFCAB4B;EFCAB4B              | 4.02E-05          | 4.02E-05             | 0.271811           | -3.67903                     | T down vs N                            | 31.314  | 15.8934   | 8.12086    | 1         |
| cg00134295                         | A2M                          | 2.44E-05          | 2.44E-05             | 0.15428            | -6.48174                     | T down vs N                            | 34.276  | 32.7171   | 15.2724    | 1         |
| cg00139092                         | KCP;KCP                      | 0.00049295        | 0.000492953          | 0.293415           | -3.40814                     | T down vs N                            | 18.95   | 14.0819   | 11.8896    | 1         |
| cg00140889                         | SLC38A4;SLC38A4              | 1.10E-06          | 1.10E-06             | 0.243509           | -4.10663                     | T down vs N                            | 57.561  | 18.6897   | 5.19508    | 1         |
| cg00141929                         | POLR3B;POLR3B                | 1.58E-06          | 1.58E-06             | 0.2135             | -4.68385                     | T down vs N                            | 54.341  | 22.3318   | 6.57526    | 1         |

| Probeset ID | UCSC_REFGENE_NAME                    | p-value<br>(Type) | p-value (T vs.<br>N) | Ratio (T<br>vs. N) | Fold-<br>Change (T<br>vs. N) | Fold-Change (T vs.<br>N) (Description) | F(Type) | SS (Type) | SS (Error) | F (Error) |
|-------------|--------------------------------------|-------------------|----------------------|--------------------|------------------------------|----------------------------------------|---------|-----------|------------|-----------|
| cg00146864  | MAP3K14                              | 4.69E-05          | 4.69E-05             | 0.284706           | -3.5124                      | T down vs N                            | 30.438  | 14.7825   | 7.77048    | 1         |
| cg00147286  | MTSSL1                               | 6.17E-05          | 6.17E-05             | 5.07012            | 5.07012                      | T up vs N                              | 28.914  | 24.6827   | 13.6584    | 1         |
| cg00147509  | FAM19A5                              | 0.00013115        | 0.000131149          | 0.273331           | -3.65856                     | T down vs N                            | 25.986  | 14.8306   | 8.5608     | 1         |
| cg00148355  | AHSP                                 | 9.21E-07          | 9.21E-07             | 0.218424           | -4.57826                     | T down vs N                            | 59.154  | 21.6772   | 5.86324    | 1         |
| cg00148892  | GATA6                                | 4.80E-07          | 4.80E-07             | 0.228371           | -4.37884                     | T down vs N                            | 65.433  | 20.4266   | 4.99482    | 1         |
| cg00149213  | SLAMF1                               | 0.00134985        | 0.00134985           | 0.274169           | -3.64739                     | T down vs N                            | 14.996  | 15.6833   | 16.7333    | 1         |
| cg00152126  | CTBP2;CTBP2                          | 2.48E-05          | 2.48E-05             | 3.55186            | 3.55186                      | T up vs N                              | 34.191  | 15.0466   | 7.04111    | 1         |
| cg00152644  | SPRR2E                               | 2.32E-05          | 2.32E-05             | 0.3169             | -3.15557                     | T down vs N                            | 36.306  | 11.6413   | 4.80969    | 1         |
| cg00155619  | HSD17B8                              | 3.43E-05          | 3.43E-05             | 4.66625            | 4.66625                      | T up vs N                              | 32.24   | 22.223    | 11.0289    | 1         |
| cg00156991  | PARS2                                | 0.0003257         | 0.000325696          | 0.284735           | -3.51204                     | T down vs N                            | 20.732  | 14.7801   | 11.4067    | 1         |
| cg00157034  | MAGEA12;MAGEA12;CSAG1;MAGEA12;CSAG1  | 5.96E-05          | 5.96E-05             | 0.310762           | -3.21789                     | T down vs N                            | 29.103  | 12.7935   | 7.03338    | 1         |
| cg00159780  | REXO1L2P;REXO1L1                     | 2.71E-05          | 2.71E-05             | 0.222162           | -4.50122                     | T down vs N                            | 33.635  | 21.1963   | 10.083     | 1         |
| cg00160002  | AGAP1;AGAP1                          | 0.00040708        | 0.000407075          | 3.03663            | 3.03663                      | T up vs N                              | 19.761  | 11.5556   | 9.35615    | 1         |
| cg00160253  | C10orf111                            | 1.74E-06          | 1.74E-06             | 0.128367           | -7.79018                     | T down vs N                            | 53.513  | 39.4713   | 11.8017    | 1         |
| cg00160262  | OR6P1                                | 5.74E-06          | 5.74E-06             | 0.191086           | -5.23325                     | T down vs N                            | 44.02   | 25.6551   | 9.32501    | 1         |
| cg00160667  | PTPRU;PTPRU;PTPRU                    | 2.99E-05          | 2.99E-05             | 6.21698            | 6.21698                      | T up vs N                              | 33.053  | 31.2733   | 15.1386    | 1         |
| cg00161955  | SLC10A5                              | 0.00014792        | 0.000147919          | 0.238142           | -4.19918                     | T down vs N                            | 24.397  | 19.284    | 12.6466    | 1         |
| cg00163018  | RYR2                                 | 0.000226          | 0.000226003          | 0.218876           | -4.56879                     | T down vs N                            | 22.383  | 21.6182   | 15.4532    | 1         |
| cg00163372  | MYC                                  | 4.70E-06          | 4.70E-06             | 0.068996           | -14.4936                     | T down vs N                            | 45.499  | 66.956    | 23.5458    | 1         |
| cg00163510  | PTPN14                               | 8.89E-06          | 8.89E-06             | 0.220111           | -4.54316                     | T down vs N                            | 40.879  | 21.4584   | 8.39876    | 1         |
| cg00163702  | PKD1L2;PKD1L2                        | 0.00014396        | 0.000143958          | 0.300852           | -3.3239                      | T down vs N                            | 24.53   | 13.5129   | 8.81386    | 1         |
| cg00164678  | C3P1                                 | 0.00045734        | 0.000457343          | 0.260944           | -3.83224                     | T down vs N                            | 19.266  | 16.9045   | 14.0393    | 1         |
| cg00166234  | LOC100132215;EHBP1;EHBP1;EHBP1;EHBP1 | 0.00013389        | 0.000133889          | 5.64588            | 5.64588                      | T up vs N                              | 24.887  | 28.062    | 18.0412    | 1         |
| cg00173005  | CD1C                                 | 5.25E-06          | 5.25E-06             | 0.143528           | -6.96726                     | T down vs N                            | 44.673  | 35.2949   | 12.641     | 1         |
| cg00173098  | NSFL1C;NSFL1C;NSFL1C                 | 0.002265          | 0.002265             | 0.31149            | -3.21037                     | T down vs N                            | 13.157  | 12.7423   | 15.4957    | 1         |
| cg00173799  | PGR                                  | 0.00110931        | 0.00110931           | 0.239224           | -4.18018                     | T down vs N                            | 15.727  | 19.1623   | 19.4956    | 1         |
| cg00175901  | OAS2;OAS2;OAS2;OAS2;OAS2;OAS2        | 1.50E-05          | 1.50E-05             | 0.28137            | -3.55404                     | T down vs N                            | 37.354  | 15.0612   | 6.45126    | 1         |
| cg00177243  | CACNB2;CACNB2;CACNB2;CACNB2;CA       | 6.01E-06          | 6.01E-06             | 0.22641            | -4.41677                     | T down vs N                            | 43.674  | 20.6659   | 7.57104    | 1         |
| cg00178728  | GPR125                               | 9.18E-05          | 9.18E-05             | 0.302283           | -3.30816                     | T down vs N                            | 26.798  | 13.4063   | 8.00436    | 1         |
| cg00180447  | CHST13                               | 7.71E-06          | 7.71E-06             | 0.28452            | -3.5147                      | T down vs N                            | 41.882  | 14.7979   | 5.65319    | 1         |
| cg00180666  | PMEPA1;PMEPA1;PMEPA1;PMEPA1          | 0.0006109         | 0.000610903          | 0.287123           | -3.48282                     | T down vs N                            | 18.064  | 14.5842   | 12.9175    | 1         |
| cg00182421  | RPL22L1                              | 2.80E-06          | 2.80E-06             | 0.138438           | -7.22345                     | T down vs N                            | 49.532  | 36.6202   | 11.8291    | 1         |
| cg00183415  | HKDC1                                | 0.00661814        | 0.00661814           | 0.203698           | -4.90924                     | T down vs N                            | 9.7251  | 23.7119   | 39.0115    | 1         |
| cg00184953  | PSORS1C3                             | 0.00015291        | 0.000152914          | 0.166405           | -6.00944                     | T down vs N                            | 24.236  | 30.1219   | 19.886     | 1         |
| cg00185103  | ZNF45                                | 0.00010666        | 0.000106661          | 0.280743           | -3.56197                     | T down vs N                            | 26.027  | 15.1142   | 9.29125    | 1         |
| cg00185122  | MMP25                                | 0.00076952        | 0.000769524          | 0.26866            | -3.72217                     | T down vs N                            | 17.138  | 16.1791   | 15.1045    | 1         |
| cg00186954  | ST5;C11orf17;C11orf17                | 0.00181166        | 0.00181166           | 0.261981           | -3.81707                     | T down vs N                            | 13.935  | 16.8049   | 19.2949    | 1         |
| cg00187686  | TCN1                                 | 8.46E-05          | 8.46E-05             | 0.139746           | -7.15586                     | T down vs N                            | 27.226  | 36.2729   | 21.3166    | 1         |
| cg00188055  | TNXB                                 | 7.82E-07          | 7.82E-07             | 0.216237           | -4.62456                     | T down vs N                            | 60.677  | 21.9648   | 5.79193    | 1         |
| cg00191903  | MUM1L1                               | 0.00056126        | 0.000561257          | 0.328082           | -3.04802                     | T down vs N                            | 18.411  | 11.6336   | 10.1099    | 1         |
| cg00193963  | WIPF3                                | 0.00021207        | 0.000212072          | 4.66085            | 4.66085                      | T up vs N                              | 22.679  | 22.1897   | 15.6551    | 1         |
| cg00199007  | SLC17A9                              | 0.00319393        | 0.00319393           | 3.50377            | 3.50377                      | T up vs N                              | 12.003  | 14.7247   | 19.6278    | 1         |
| cg00200653  | RORA;RORA;RORA;RORA                  | 7.66E-10          | 7.66E-10             | 0.134724           | -7.42256                     | T down vs N                            | 185.02  | 35.4206   | 2.87169    | 1         |
| cg00201025  | DZIP1L;DZIP1L                        | 0.00627875        | 0.00627875           | 0.274701           | -3.64033                     | T down vs N                            | 9.8823  | 15.6364   | 25.3161    | 1         |
| cg00202246  | OR13C8                               | 0.00029105        | 0.000291045          | 0.193881           | -5.15781                     | T down vs N                            | 21.232  | 25.2069   | 18.9955    | 1         |
| cg00204159  | FAM83G;SLC5A10;SLC5A10               | 0.00517422        | 0.00517422           | 3.72359            | 3.72359                      | T up vs N                              | 10.47   | 16.1885   | 24.7393    | 1         |
| cg00204782  | TBX1;TBX1;TBX1                       | 0.00458275        | 0.00458275           | 3.17648            | 3.17648                      | T up vs N                              | 10.846  | 12.5115   | 18.4563    | 1         |
| cg00206271  | SNTG2                                | 2.92E-05          | 2.92E-05             | 0.279459           | -3.57835                     | T down vs N                            | 33.183  | 15.2235   | 7.34046    | 1         |
| cg00206542  | OR5A1                                | 9.34E-06          | 9.34E-06             | 0.120348           | -8.30924                     | T down vs N                            | 40.539  | 41.9908   | 16.5731    | 1         |
| cg00208274  | FOXK1                                | 0.00698645        | 0.00698645           | 3.51061            | 3.51061                      | T up vs N                              | 9.5646  | 14.7705   | 24.7088    | 1         |
| cg00208830  | LAMC2;LAMC2                          | 6.54E-05          | 6.54E-05             | 0.235078           | -4.25391                     | T down vs N                            | 28.592  | 19.6337   | 10.9868    | 1         |
| cg00209923  | ANP32A                               | 0.00086697        | 0.00086697           | 0.324203           | -3.08449                     | T down vs N                            | 16.671  | 11.8833   | 11.4052    | 1         |
| cg00211337  | TRIP12                               | 0.00064768        | 0.000647679          | 0.301874           | -3.31265                     | T down vs N                            | 17.827  | 13.4367   | 12.0594    | 1         |
| cg00211661  | ARAP1;ARAP1;ARAP1                    | 3.73E-06          | 3.73E-06             | 0.254278           | -3.9327                      | T down vs N                            | 47.267  | 17.5621   | 5.94477    | 1         |
| cg00212979  | EHD1                                 | 0.00025491        | 0.000254912          | 0.223606           | -4.47215                     | T down vs N                            | 21.831  | 21.014    | 15.4015    | 1         |
| cg00213668  | BAIAP2L1                             | 0.00151133        | 0.00151133           | 0.323914           | -3.08724                     | T down vs N                            | 14.584  | 11.9021   | 13.0578    | 1         |
| cg00213745  | HEG1                                 | 0.00023897        | 0.000238969          | 0.245685           | -4.07025                     | T down vs N                            | 22.126  | 18.455    | 13.3454    | 1         |
| cg00215432  | MIR375                               | 0.00025891        | 0.00025891           | 0.909674           | 0.909674                     | T up vs N                              | 21.76   | 45.659    | 33.5731    | 1         |
| cg00215587  | MKRN3;MKRN3                          | 0.00029127        | 0.000291266          | 0.319945           | -3.12553                     | T down vs N                            | 21.229  | 12.1638   | 9.1679     | 1         |
| cg00217055  | USP36                                | 0.00035474        | 0.000354742          | 0.197512           | -5.06298                     | T down vs N                            | 20.357  | 24.6399   | 19.3664    | 1         |
| cg00218620  | MIR375                               | 0.0001608         | 0.000160795          | 3.93152            | 3.93152                      | T up vs N                              | 23.992  | 17.5544   | 11.7067    | 1         |
| cg00219169  | DIP2C                                | 0.00042098        | 0.000420982          | 4.16996            | 4.16996                      | T up vs N                              | 19.618  | 19.0968   | 15.5754    | 1         |
| cg00219585  | DCP1B                                | 0.0003547         | 0.000354704          | 0.300322           | -3.32976                     | T down vs N                            | 20.357  | 13.5526   | 10.6518    | 1         |
| cg00220413  | NLGN2                                | 2.83E-05          | 2.83E-05             | 0.23816            | -4.19885                     | T down vs N                            | 33.376  | 19.282    | 9.24364    | 1         |
| cg00221012  | FSCN2;FSCN2                          | 1.76E-05          | 1.76E-05             | 0.320366           | -3.12143                     | T down vs N                            | 36.325  | 12.1358   | 5.34539    | 1         |
| cg00221494  | FARP1;FARP1                          | 0.00265548        | 0.00265548           | 3.11               | 3.11                         | T up vs N                              | 12.616  | 12.0577   | 15.2914    | 1         |
| cg00221747  | INS-IGF2;IGF2;IGF2;IGF2              | 1.02E-05          | 1.02E-05             | 0.046163           | -21.6625                     | T down vs N                            | 39.944  | 88.5965   | 35.4884    | 1         |

| Probeset ID | UCSC_REFGENE_NAME                                                 | p-value<br>(Type) | p-value (T vs.<br>N) | Ratio (T<br>vs. N) | Fold-<br>Change (T<br>vs. N) | Fold-Change (T vs.<br>N) (Description) | F(Type) | SS (Type) | SS (Error) | F (Error) |
|-------------|-------------------------------------------------------------------|-------------------|----------------------|--------------------|------------------------------|----------------------------------------|---------|-----------|------------|-----------|
| cg00223767  | UVRAG                                                             | 0.00162863        | 0.00162863           | 0.315907           | -3.16549                     | T down vs N                            | 14.315  | 12.4365   | 13.9009    | 1         |
| cg00225006  | WHAMM                                                             | 0.00012166        | 0.000121658          | 0.200333           | -4.9917                      | T down vs N                            | 25.364  | 24.211    | 15.273     | 1         |
| cg00231049  | E2F2                                                              | 0.00104039        | 0.00104039           | 0.307075           | -3.25653                     | T down vs N                            | 15.969  | 13.0561   | 13.0812    | 1         |
| cg00231140  | ACAA2;SCARNA17                                                    | 0.00177336        | 0.00177336           | 3.1085             | 3.1085                       | T up vs N                              | 14.011  | 12.0475   | 13.7578    | 1         |
| cg00237268  | SORCS2                                                            | 0.00018784        | 0.000187836          | 0.297876           | -3.35711                     | T down vs N                            | 23.249  | 13.7375   | 9.45425    | 1         |
| cg00237475  | LBXCOR1                                                           | 3.07E-05          | 3.07E-05             | 5.51386            | 5.51386                      | T up vs N                              | 32.888  | 27.3      | 13.2817    | 1         |
| cg00237904  | H19                                                               | 3.22E-07          | 3.22E-07             | 3.44248            | 3.44248                      | T up vs N                              | 69.554  | 14.3131   | 3.29255    | 1         |
| cg00238815  | FAM83H                                                            | 7.85E-06          | 7.85E-06             | 0.235797           | -4.24094                     | T down vs N                            | 41.752  | 19.551    | 7.49222    | 1         |
| cg00238818  | PRR7                                                              | 0.00013511        | 0.000135113          | 0.275065           | -3.63551                     | T down vs N                            | 24.842  | 15.6043   | 10.0503    | 1         |
| cg00238848  | ARAP1;ARAP1;ARAP1                                                 | 6.54E-06          | 6.54E-06             | 4.98305            | 4.98305                      | T up vs N                              | 45.54   | 22.7377   | 7.48933    | 1         |
| cg00238958  | GPX6                                                              | 5.14E-07          | 5.14E-07             | 0.291459           | -3.43101                     | T down vs N                            | 64.754  | 14.2359   | 3.51754    | 1         |
| cg00239660  | C6orf191                                                          | 0.00069835        | 0.000698351          | 0.234111           | -4.27147                     | T down vs N                            | 17.524  | 19.7456   | 18.028     | 1         |
| cg00241002  | LOC731789                                                         | 4.45E-05          | 4.45E-05             | 0.163971           | -6.09866                     | T down vs N                            | 30.736  | 30.619    | 15.939     | 1         |
| cg00242098  | KPRP                                                              | 0.00018169        | 0.000181685          | 0.185891           | -5.3795                      | T down vs N                            | 23.407  | 26.5168   | 18.1259    | 1         |
| cg00242627  | NTRK1;INSRR                                                       | 0.00017774        | 0.000177735          | 5.9338             | 5.9338                       | T up vs N                              | 23.511  | 29.6979   | 20.21      | 1         |
| cg00242951  | LHFPL4                                                            | 4.64E-05          | 4.64E-05             | 0.314135           | -3.18334                     | T down vs N                            | 30.493  | 12.5582   | 6.58934    | 1         |
| cg00245878  | ZNF117;ZNF117                                                     | 1.68E-05          | 1.68E-05             | 0.112508           | -8.88825                     | T down vs N                            | 36.611  | 44.7051   | 19.5372    | 1         |
| cg00248174  | RET;RET                                                           | 0.00483673        | 0.00483673           | 3.11563            | 3.11563                      | T up vs N                              | 10.678  | 12.0962   | 18.1245    | 1         |
| cg00248449  | LOC400927                                                         | 2.16E-05          | 2.16E-05             | 0.285204           | -3.50626                     | T down vs N                            | 35.02   | 14.7414   | 6.73512    | 1         |
| cg00248828  | C17orf50                                                          | 0.00024752        | 0.000247524          | 0.325997           | -3.06751                     | T down vs N                            | 21.965  | 11.7671   | 8.57159    | 1         |
| cg00249503  | DNAH17                                                            | 1.88E-06          | 1.88E-06             | 0.285279           | -3.50534                     | T down vs N                            | 52.853  | 14.7352   | 4.46074    | 1         |
| cg00249511  | SCT;SCT                                                           | 0.00113972        | 0.00113972           | 12.1367            | 12.1367                      | T up vs N                              | 15.625  | 58.3622   | 59.764     | 1         |
| cg00251716  | SDCCAG8                                                           | 0.0037051         | 0.0037051            | 0.306147           | -3.26641                     | T down vs N                            | 11.521  | 13.1231   | 18.2255    | 1         |
| cg00254681  | PRRT1                                                             | 0.00113042        | 0.00113042           | 7.24181            | 7.24181                      | T up vs N                              | 15.656  | 36.7143   | 37.5222    | 1         |
| cg00255699  | TRIT1                                                             | 0.00052066        | 0.000520657          | 0.239519           | -4.17504                     | T down vs N                            | 18.722  | 19.1294   | 16.3481    | 1         |
| cg00260116  | C7orf52                                                           | 7.07E-05          | 7.07E-05             | 4.69418            | 4.69418                      | T up vs N                              | 28.175  | 22.3956   | 12.7181    | 1         |
| cg00260201  | PRR15L                                                            | 0.00093895        | 0.000938945          | 0.32722            | -3.05604                     | T down vs N                            | 16.362  | 11.6886   | 11.4301    | 1         |
| cg00260387  | PRR4;TAS2R20;PRH1                                                 | 0.00136817        | 0.00136817           | 0.32032            | -3.12187                     | T down vs N                            | 14.947  | 12.1388   | 12.9944    | 1         |
| cg00261325  | AACSL                                                             | 0.00201067        | 0.00201067           | 0.225017           | -4.44411                     | T down vs N                            | 13.569  | 20.8379   | 24.5709    | 1         |
| cg00262446  | EMCN;EMCN;EMCN;EMCN                                               | 7.78E-06          | 7.78E-06             | 0.223923           | -4.46583                     | T down vs N                            | 41.823  | 20.9744   | 8.02402    | 1         |
| cg00262621  | MMP23B                                                            | 0.00401796        | 0.00401796           | 3.05039            | 3.05039                      | T up vs N                              | 11.51   | 10.9646   | 14.2891    | 1         |
| cg00265863  | XKR8                                                              | 0.00465697        | 0.00465697           | 5.11523            | 5.11523                      | T up vs N                              | 10.796  | 24.9529   | 36.9803    | 1         |
| cg00267352  | MAMLD1;MAMLD1                                                     | 0.00048295        | 0.000482948          | 0.231164           | -4.32594                     | T down vs N                            | 19.036  | 20.0917   | 16.8873    | 1         |
| cg00268185  | MYLK;MYLK;MYLK;MYLK                                               | 0.00023295        | 0.000232952          | 4.97908            | 4.97908                      | T up vs N                              | 22.243  | 24.1348   | 17.3606    | 1         |
| cg00269606  | CRH                                                               | 7.40E-05          | 7.40E-05             | 0.218084           | -4.58539                     | T down vs N                            | 27.935  | 21.7215   | 12.4412    | 1         |
| cg00270291  | MLKL;MLKL                                                         | 0.00727061        | 0.00727061           | 0.300088           | -3.33236                     | T down vs N                            | 9.4471  | 13.5701   | 22.9829    | 1         |
| cg00270625  | CPT1B;CPT1B;CPT1B;CPT1B;CHKB-<br>CPT1B;CPT1B;CPT1B;CPT1B;CPT1B;CP |                   |                      |                    |                              |                                        |         |           |            |           |
|             | T1B;CPT1B;CPT1B                                                   | 0.00012804        | 0.000128038          | 6.46215            | 6.46215                      | T up vs N                              | 25.109  | 32.6113   | 20.781     | 1         |
| cg00275449  | ACAP2                                                             | 0.00091366        | 0.000913663          | 0.327902           | -3.04969                     | T down vs N                            | 16.467  | 11.6451   | 11.3147    | 1         |
| cg00275741  | PCDHA7;PCDHA12;PCDHA6;PCDHA10;<br>PCDHA4;PCDHA11;PCDHA8;PCDHA1;P  |                   |                      |                    |                              |                                        |         |           |            |           |
|             | CDHA2;PCDHA6;PCDHA1;PCDHA9;                                       | 1.07E-05          | 1.07E-05             | 7.70937            | 7.70937                      | T up vs N                              | 39.596  | 39.0714   | 15.788     | 1         |
| cg00276214  | ALDH3B2;ALDH3B2                                                   | 0.00018265        | 0.000182652          | 0.285168           | -3.5067                      | T down vs N                            | 23.382  | 14.7443   | 10.0895    | 1         |
| cg00276389  | TMPRSS6                                                           | 7.98E-08          | 7.98E-08             | 0.286787           | -3.48691                     | T down vs N                            | 85.646  | 14.6116   | 2.72967    | 1         |
| cg00277233  | SCFD2                                                             | 7.37E-06          | 7.37E-06             | 0.060639           | -16.491                      | T down vs N                            | 42.207  | 73.5785   | 27.8924    | 1         |
| cg00278547  | HOXD3                                                             | 0.00131834        | 0.00131834           | 5.97135            | 5.97135                      | T up vs N                              | 15.083  | 29.9087   | 31.7272    | 1         |
| cg00279529  | TKTL1;TEX28;TKTL1                                                 | 0.00448288        | 0.00448288           | 0.212624           | -4.70313                     | T down vs N                            | 10.915  | 22.4508   | 32.9089    | 1         |
| cg00279557  | CLDN6                                                             | 2.98E-06          | 2.98E-06             | 0.307403           | -3.25306                     | T down vs N                            | 49.035  | 13.0325   | 4.25252    | 1         |
| cg00280799  | ZNF467                                                            | 0.00063576        | 0.000635755          | 0.312136           | -3.20373                     | T down vs N                            | 17.903  | 12.6971   | 11.3478    | 1         |
| cg00280812  | KRT80;KRT80                                                       | 6.13E-05          | 6.13E-05             | 0.182216           | -5.48798                     | T down vs N                            | 28.947  | 27.1498   | 15.0069    | 1         |
| cg00281100  | RNLS                                                              | 4.82E-05          | 4.82E-05             | 0.324343           | -3.08316                     | T down vs N                            | 30.277  | 11.8742   | 6.27493    | 1         |
| cg00281273  | LPCAT1                                                            | 0.0036039         | 0.0036039            | 0.22568            | -4.43105                     | T down vs N                            | 11.61   | 20.7557   | 28.604     | 1         |
| cg00282704  | MIR1915;C10orf114                                                 | 0.00070214        | 0.000702136          | 0.233757           | -4.27795                     | T down vs N                            | 17.503  | 19.7868   | 18.088     | 1         |
| cg00282877  | LOC619207                                                         | 0.00071768        | 0.000717683          | 0.317319           | -3.1514                      | T down vs N                            | 17.415  | 12.3404   | 11.3376    | 1         |
| cg00287012  | TTC39C;TTC39C;TTC39C                                              | 3.58E-05          | 3.58E-05             | 0.294256           | -3.3984                      | T down vs N                            | 31.993  | 14.0162   | 7.00973    | 1         |
| cg00290158  | C20orf30;C20orf30;C20orf30;C20orf3                                |                   |                      |                    |                              |                                        |         |           |            |           |
|             | 0                                                                 | 0.00214216        | 0.00214216           | 0.291931           | -3.42546                     | T down vs N                            | 13.349  | 14.1986   | 17.0182    | 1         |
| cg00292312  | CAMTA1                                                            | 1.32E-05          | 1.32E-05             | 0.176245           | -5.67392                     | T down vs N                            | 38.212  | 28.2229   | 11.8173    | 1         |
| cg00294534  | PSMG3;PSMG3                                                       | 0.00011221        | 0.000112207          | 0.315599           | -3.16858                     | T down vs N                            | 25.77   | 12.4576   | 7.73453    | 1         |
| cg00295259  | GLI2                                                              | 7.15E-05          | 7.15E-05             | 0.321532           | -3.11011                     | T down vs N                            | 28.115  | 12.0584   | 6.8623     | 1         |
| cg00295573  | MAGEA8;MAGEA8;MAGEA8                                              | 0.00026532        | 0.00026532           | 0.281354           | -3.55424                     | T down vs N                            | 21.649  | 15.0625   | 11.1323    | 1         |
| cg00298065  | ZNF274;ZNF274;ZNF274                                              | 0.0015283         | 0.0015283            | 3.6624             | 3.6624                       | T up vs N                              | 14.543  | 15.783    | 17.3637    | 1         |
| cg00298324  | FAM110A;FAM110A                                                   | 4.86E-05          | 4.86E-05             | 5.15965            | 5.15965                      | T up vs N                              | 30.239  | 25.2179   | 13.3435    | 1         |
| cg00298977  | LELP1                                                             | 1.55E-06          | 1.55E-06             | 0.123171           | -8.1188                      | T down vs N                            | 54.488  | 41.0762   | 12.0618    | 1         |
| cg00299070  | RYR2                                                              | 0.00133657        | 0.00133657           | 0.297889           | -3.35696                     | T down vs N                            | 15.032  | 13.7365   | 14.6207    | 1         |
| cg00299558  | VWA5B2;MIR1224                                                    | 1.33E-07          | 1.33E-07             | 0.125738           | -7.95303                     | T down vs N                            | 79.397  | 40.2709   | 8.11536    | 1         |
| cg00299767  | ZNF219;ZNF219;ZNF219                                              | 0.00088621        | 0.000886208          | 3.47925            | 3.47925                      | T up vs N                              | 16.585  | 14.5602   | 14.0463    | 1         |
| cg00300637  | AHRR                                                              | 0.00385131        | 0.00385131           | 0.318666           | -3.13808                     | T down vs N                            | 11.397  | 12.2495   | 17.1975    | 1         |
| cg00303378  | VSIG8;C1orf204                                                    | 3.07E-05          | 3.07E-05             | 3.29652            | 3.29652                      | T up vs N                              | 32.891  | 13.3274   | 6.48321    | 1         |
| cg00303982  | SCRT1                                                             | 4.61E-06          | 4.61E-06             | 8.66779            | 8.66779                      | T up vs N                              | 45.657  | 43.6832   | 15.3083    | 1         |

| Probeset ID                       | UCSC_REFGENE_NAME               | p-value<br>(Type) | p-value (T vs.<br>N) | Ratio (T<br>vs. N) | Fold-<br>Change (T<br>vs. N) | Fold-Change (T vs.<br>N) (Description) | F(Type) | SS (Type) | SS (Error) | F (Error) |
|-----------------------------------|---------------------------------|-------------------|----------------------|--------------------|------------------------------|----------------------------------------|---------|-----------|------------|-----------|
| cg00305320                        | MPV17L;MPV17L                   | 9.14E-05          | 9.14E-05             | 5.97643            | 5.97643                      | T up vs N                              | 26.818  | 29.9372   | 17.8607    | 1         |
| cg00305774                        | TMEM88B                         | 0.00075161        | 0.000751613          | 5.59549            | 5.59549                      | T up vs N                              | 17.232  | 27.7721   | 25.7872    | 1         |
| cg00306578                        | CHST4;CHST4                     | 6.84E-06          | 6.84E-06             | 0.197655           | -5.05933                     | T down vs N                            | 42.742  | 24.618    | 9.21543    | 1         |
| cg00310404                        | SYTL1                           | 0.00130441        | 0.00130441           | 0.228421           | -4.37788                     | T down vs N                            | 15.122  | 20.4205   | 21.606     | 1         |
| cg00310588                        | HTR3C                           | 1.52E-06          | 1.52E-06             | 0.239828           | -4.16966                     | T down vs N                            | 54.638  | 19.0949   | 5.59171    | 1         |
| SLC2A5;SLC2A5;SLC2A5;SLC2A5;SLC2A |                                 |                   |                      |                    |                              |                                        |         |           |            |           |
| cg00310940                        | 5                               | 0.0003197         | 0.000319697          | 0.250255           | -3.99592                     | T down vs N                            | 20.814  | 17.9735   | 13.8165    | 1         |
| cg00314029                        | RBMS1;RBMS1                     | 7.25E-05          | 7.25E-05             | 0.156249           | -6.40003                     | T down vs N                            | 28.039  | 32.2744   | 18.4171    | 1         |
| cg00314622                        | SYN2;TIMP4;SYN2                 | 2.78E-05          | 2.78E-05             | 0.244399           | -4.09166                     | T down vs N                            | 33.479  | 18.5932   | 8.88586    | 1         |
| cg00314827                        | HRNBP3                          | 0.00581327        | 0.00581327           | 0.308554           | -3.24093                     | T down vs N                            | 10.114  | 12.9501   | 20.4858    | 1         |
| cg00315837                        | OR4D10                          | 0.00027415        | 0.000274149          | 0.295482           | -3.3843                      | T down vs N                            | 21.501  | 13.9211   | 10.3595    | 1         |
| cg00320094                        | GPR177;GPR177                   | 0.00088439        | 0.000884394          | 0.260223           | -3.84285                     | T down vs N                            | 16.593  | 16.9743   | 16.3673    | 1         |
| cg00320608                        | WDR43                           | 5.48E-05          | 5.48E-05             | 0.309475           | -3.23128                     | T down vs N                            | 29.561  | 12.8845   | 6.9738     | 1         |
| cg00321824                        | SLC22A3                         | 4.13E-06          | 4.13E-06             | 0.329098           | -3.03861                     | T down vs N                            | 46.479  | 11.5692   | 3.98263    | 1         |
| cg00325910                        | S100A7                          | 7.71E-08          | 7.71E-08             | 0.207789           | -4.81258                     | T down vs N                            | 86.088  | 23.1229   | 4.29752    | 1         |
| cg00326231                        | CLTCL1;CLTCL1                   | 0.0009407         | 0.000940699          | 0.298428           | -3.35089                     | T down vs N                            | 16.355  | 13.6955   | 13.3984    | 1         |
| cg00327072                        | NEURL1B                         | 4.82E-06          | 4.82E-06             | 7.97317            | 7.97317                      | T up vs N                              | 45.307  | 40.3692   | 14.2564    | 1         |
| cg00327332                        | CSTT                            | 1.34E-05          | 1.34E-05             | 0.202068           | -4.94884                     | T down vs N                            | 38.099  | 23.952    | 10.0589    | 1         |
| cg00328075                        | DLC1;DLC1                       | 0.00029169        | 0.000291688          | 4.60828            | 4.60828                      | T up vs N                              | 21.222  | 21.8638   | 16.4838    | 1         |
| cg00328376                        | SKAP2                           | 0.000149          | 0.000149004          | 0.279074           | -3.58327                     | T down vs N                            | 24.362  | 15.2564   | 10.0199    | 1         |
| cg00328965                        | ELF4;ELF4                       | 0.00072727        | 0.00072727           | 0.298593           | -3.34904                     | T down vs N                            | 17.362  | 13.683    | 12.6093    | 1         |
| cg00329040                        | FRMPD4                          | 5.11E-06          | 5.11E-06             | 0.268427           | -3.72541                     | T down vs N                            | 44.877  | 16.2006   | 5.77602    | 1         |
| cg00329300                        | TSTD1;TSTD1;TSTD1               | 0.00283899        | 0.00283899           | 3.59149            | 3.59149                      | T up vs N                              | 12.393  | 15.3112   | 19.7679    | 1         |
| cg00329697                        | PTCH2                           | 3.36E-05          | 3.36E-05             | 12.6847            | 12.6847                      | T up vs N                              | 32.356  | 60.4455   | 29.89      | 1         |
| cg00332153                        | BANK1;BANK1;BANK1;BANK1         | 5.63E-06          | 5.63E-06             | 5.70946            | 5.70946                      | T up vs N                              | 44.16   | 28.4263   | 10.2993    | 1         |
| cg00332882                        | LOC284788;LOC284788             | 0.00079833        | 0.000798333          | 0.270726           | -3.69377                     | T down vs N                            | 16.993  | 15.9911   | 15.0563    | 1         |
| cg00334532                        | HLA-DQA2                        | 5.11E-07          | 5.11E-07             | 0.23825            | -4.19727                     | T down vs N                            | 64.814  | 19.2718   | 4.75744    | 1         |
| cg00334933                        | SEMA3D                          | 1.64E-05          | 1.64E-05             | 0.297871           | -3.35716                     | T down vs N                            | 36.795  | 13.7379   | 5.97382    | 1         |
| cg00335361                        | GPR52;RABGAP1L                  | 0.00050526        | 0.000505256          | 3.42928            | 3.42928                      | T up vs N                              | 18.847  | 14.2243   | 12.0755    | 1         |
|                                   |                                 |                   |                      |                    |                              |                                        |         |           |            |           |
| cg00340856                        | ZNF780A;ZNF780A;ZNF780A;ZNF780A | 0.00078408        | 0.000784082          | 0.260238           | -3.84263                     | T down vs N                            | 17.064  | 16.9728   | 15.9142    | 1         |
| cg00341204                        | RGL3;RGL3                       | 4.85E-05          | 4.85E-05             | 0.180479           | -5.54081                     | T down vs N                            | 30.239  | 27.4562   | 14.5275    | 1         |
| cg00344920                        | PYY                             | 1.62E-05          | 1.62E-05             | 0.182739           | -5.47229                     | T down vs N                            | 36.857  | 27.0585   | 11.7464    | 1         |
| cg00345366                        | SAAL1                           | 8.47E-05          | 8.47E-05             | 0.162323           | -6.16056                     | T down vs N                            | 27.215  | 30.962    | 18.2029    | 1         |
| cg00345862                        | LECT1;LECT1;LECT1;LECT1         | 4.97E-07          | 4.97E-07             | 4.04713            | 4.04713                      | T up vs N                              | 65.098  | 18.3055   | 4.49918    | 1         |
| cg00346208                        | VWASB1                          | 0.00234054        | 0.00234054           | 7.33401            | 7.33401                      | T up vs N                              | 13.045  | 37.185    | 45.61      | 1         |
| cg00348992                        | KIF26B                          | 6.63E-05          | 6.63E-05             | 0.25646            | -3.89924                     | T down vs N                            | 28.524  | 17.3436   | 9.72849    | 1         |
| cg00350448                        | ARAP1;ARAP1;ARAP1               | 0.00092092        | 0.000920919          | 0.327728           | -3.05131                     | T down vs N                            | 16.437  | 11.6562   | 11.3465    | 1         |
| PAX8;PAX8;LOC654433;PAX8;PAX8;PA  |                                 |                   |                      |                    |                              |                                        |         |           |            |           |
| cg00354484                        | X8;LOC440839                    | 0.0003836         | 0.000383596          | 0.289372           | -3.45576                     | T down vs N                            | 20.017  | 14.4024   | 11.5121    | 1         |
| cg00355447                        | HCG18;HCG18                     | 0.00114458        | 0.00114458           | 0.133222           | -7.50627                     | T down vs N                            | 15.609  | 38.0566   | 39.0106    | 1         |
| cg00357546                        | KND1C                           | 0.00087582        | 0.000875818          | 0.30112            | -3.32093                     | T down vs N                            | 16.631  | 13.4928   | 12.9807    | 1         |
| cg00357958                        | GPR81;GPR81                     | 1.58E-05          | 1.58E-05             | 0.197453           | -5.06449                     | T down vs N                            | 37.001  | 24.649    | 10.6589    | 1         |
| cg00358609                        | EPS8L1                          | 2.95E-05          | 2.95E-05             | 0.314663           | -3.178                       | T down vs N                            | 33.128  | 12.5218   | 6.04767    | 1         |
| cg00359423                        | CEP57                           | 3.62E-05          | 3.62E-05             | 0.161088           | -6.20779                     | T down vs N                            | 31.918  | 31.2227   | 15.6515    | 1         |
| cg00360610                        | SNRNP200                        | 2.85E-05          | 2.85E-05             | 0.133933           | -7.46642                     | T down vs N                            | 33.335  | 37.8559   | 18.1697    | 1         |
| cg00360794                        | LTKE;LTKE;LTKE                  | 1.01E-05          | 1.01E-05             | 7.99044            | 7.99044                      | T up vs N                              | 39.987  | 40.4535   | 16.1868    | 1         |
| cg00361898                        | SNORD115-40                     | 8.36E-06          | 8.36E-06             | 0.196403           | -5.09158                     | T down vs N                            | 41.313  | 24.8114   | 9.60921    | 1         |
| cg00363080                        | ADARB2                          | 0.00043298        | 0.000432983          | 0.207931           | -4.80929                     | T down vs N                            | 19.498  | 23.1028   | 18.9585    | 1         |
| cg00363845                        | AN08                            | 4.09E-05          | 4.09E-05             | 0.285476           | -3.50293                     | T down vs N                            | 31.216  | 14.719    | 7.54438    | 1         |
| cg00364339                        | CHCHD6                          | 0.0018656         | 0.0018656            | 0.230789           | -4.33296                     | T down vs N                            | 13.832  | 20.1363   | 23.2929    | 1         |
| cg00366917                        | MBP;MBP                         | 1.33E-06          | 1.33E-06             | 5.84377            | 5.84377                      | T up vs N                              | 55.806  | 29.1901   | 8.36906    | 1         |
| cg00367281                        | CHRN3                           | 1.07E-05          | 1.07E-05             | 0.271292           | -3.68606                     | T down vs N                            | 39.584  | 15.94     | 6.44294    | 1         |
| cg00367615                        | C13orf33                        | 6.28E-05          | 6.28E-05             | 3.43145            | 3.43145                      | T up vs N                              | 28.815  | 14.2389   | 7.90626    | 1         |
| cg00368844                        | PROKR2                          | 3.63E-05          | 3.63E-05             | 0.328082           | -3.04802                     | T down vs N                            | 31.9    | 11.6336   | 5.83502    | 1         |
| cg00369241                        | IFITM5                          | 0.00014591        | 0.000145913          | 0.206405           | -4.84485                     | T down vs N                            | 24.464  | 23.3201   | 15.2518    | 1         |
| cg00370106                        | SYTL3;SYTL3                     | 6.40E-06          | 6.40E-06             | 0.255371           | -3.91587                     | T down vs N                            | 43.216  | 17.4522   | 6.46142    | 1         |
| cg00370589                        | IL1F6                           | 0.00034639        | 0.000346387          | 0.235303           | -4.24983                     | T down vs N                            | 20.461  | 19.6077   | 15.3327    | 1         |
| cg00371829                        | NRG4                            | 9.56E-06          | 9.56E-06             | 0.146731           | -6.81521                     | T down vs N                            | 40.38   | 34.4971   | 13.669     | 1         |
| PRAME;PRAME;LOC648691;PRAME;P     |                                 |                   |                      |                    |                              |                                        |         |           |            |           |
| cg00372774                        | RAME;PRAME                      | 1.57E-05          | 1.57E-05             | 0.211595           | -4.726                       | T down vs N                            | 37.049  | 22.5917   | 9.75661    | 1         |
| cg00375691                        | EMX2OS                          | 5.85E-05          | 5.85E-05             | 0.315359           | -3.17098                     | T down vs N                            | 29.2    | 12.474    | 6.83497    | 1         |
| cg00378510                        | LINGO3                          | 0.00061553        | 0.000615528          | 3.2396             | 3.2396                       | T up vs N                              | 18.034  | 12.9411   | 11.4817    | 1         |
| cg00378950                        | TGIF2LX                         | 1.95E-05          | 1.95E-05             | 0.099022           | -10.0988                     | T down vs N                            | 35.676  | 50.0833   | 22.4611    | 1         |
| cg00381745                        | ZNF394                          | 0.0001667         | 0.000166697          | 0.100756           | -9.92496                     | T down vs N                            | 23.819  | 49.3341   | 33.1401    | 1         |
| cg00383136                        | HLA-DRA                         | 5.86E-05          | 5.86E-05             | 0.301931           | -3.31201                     | T down vs N                            | 29.198  | 13.4324   | 7.36076    | 1         |
| cg00386408                        | TGFB1                           | 1.98E-05          | 1.98E-05             | 11.9594            | 11.9594                      | T up vs N                              | 35.587  | 57.6762   | 25.9313    | 1         |
| cg00386551                        | FGF12;FGF12;FGF12               | 0.00024389        | 0.000243891          | 10.0707            | 10.0707                      | T up vs N                              | 22.033  | 49.9629   | 36.2831    | 1         |
| cg00386925                        | FOXP1;FOXP1                     | 0.00017025        | 0.000170246          | 0.309851           | -3.22736                     | T down vs N                            | 23.717  | 12.8579   | 8.67407    | 1         |
| cg00386961                        | CLCN6                           | 1.36E-05          | 1.36E-05             | 0.235159           | -4.25245                     | T down vs N                            | 38.013  | 19.6243   | 8.26013    | 1         |
| cg00394221                        | FCRL1;FCRL1;FCRL1               | 4.06E-07          | 4.06E-07             | 0.134082           | -7.4581                      | T down vs N                            | 67.133  | 37.8139   | 9.01229    | 1         |
| cg00396687                        | ELL3                            | 0.00025106        | 0.000251062          | 6.87828            | 6.87828                      | T up vs N                              | 21.9    | 34.829    | 25.4459    | 1         |

| Probeset ID | UCSC_REFGENE_NAME                   | p-value<br>(Type) | p-value (T vs.<br>N) | Ratio (T<br>vs. N) | Fold-<br>Change (T<br>vs. N) | Fold-Change (T vs.<br>N) (Description) | F(Type) | SS (Type) | SS (Error) | F (Error) |
|-------------|-------------------------------------|-------------------|----------------------|--------------------|------------------------------|----------------------------------------|---------|-----------|------------|-----------|
| cg00397422  | SLFN14                              | 2.75E-05          | 2.75E-05             | 0.199249           | -5.01884                     | T down vs N                            | 33.548  | 24.3746   | 11.6251    | 1         |
| cg00399374  | CHMP4C                              | 0.00273857        | 0.00273857           | 4.922              | 4.922                        | T up vs N                              | 12.513  | 23.7893   | 30.4186    | 1         |
| cg00400259  | CCDC154                             | 0.00288904        | 0.00288904           | 0.266405           | -3.75369                     | T down vs N                            | 12.335  | 16.3874   | 21.2573    | 1         |
| cg00401091  | NFATC2;NFATC2;NFATC2                | 0.00106179        | 0.00106179           | 5.70401            | 5.70401                      | T up vs N                              | 15.892  | 28.3951   | 28.5881    | 1         |
| cg00401233  | SELP                                | 3.58E-05          | 3.58E-05             | 0.198679           | -5.03323                     | T down vs N                            | 31.988  | 24.4612   | 12.2354    | 1         |
| cg00401552  | PRSS33                              | 0.00162822        | 0.00162822           | 4.07168            | 4.07168                      | T up vs N                              | 14.315  | 18.4642   | 20.637     | 1         |
| cg00404641  | NUDT16P;NUDT16P                     | 0.00010692        | 0.000106919          | 4.01548            | 4.01548                      | T up vs N                              | 26.015  | 18.1004   | 11.1323    | 1         |
| cg00405699  | ST8SIA4;ST8SIA4                     | 0.00223603        | 0.00223603           | 3.09008            | 3.09008                      | T up vs N                              | 13.201  | 11.9215   | 14.449     | 1         |
| cg00406188  | LCE2C                               | 0.00074103        | 0.000741029          | 0.204356           | -4.89342                     | T down vs N                            | 17.288  | 23.6158   | 21.8566    | 1         |
| cg00406460  | SYN1;SYN1                           | 0.00169198        | 0.00169198           | 3.12717            | 3.12717                      | T up vs N                              | 14.551  | 11.4588   | 11.8123    | 1         |
| cg00407329  | SIM1                                | 0.00037802        | 0.000378015          | 0.309765           | -3.22825                     | T down vs N                            | 20.081  | 12.8639   | 10.2499    | 1         |
| cg00408567  | GALNT10;GALNT10                     | 2.88E-05          | 2.88E-05             | 0.27372            | -3.65336                     | T down vs N                            | 33.284  | 15.723    | 7.55821    | 1         |
| cg00409844  | OCLN                                | 6.79E-06          | 6.79E-06             | 0.226504           | -4.41494                     | T down vs N                            | 42.794  | 20.6543   | 7.72237    | 1         |
| cg00410600  | SCRT1                               | 0.00037944        | 0.000379439          | 4.7005             | 4.7005                       | T up vs N                              | 20.748  | 21.1149   | 15.2655    | 1         |
| cg00412148  | PTER;PTER                           | 0.00046712        | 0.000467119          | 0.24286            | -4.1176                      | T down vs N                            | 19.176  | 18.7603   | 15.653     | 1         |
| cg00412294  | NEDD1;NEDD1;NEDD1;NEDD1             | 4.29E-07          | 4.29E-07             | 0.117704           | -8.49587                     | T down vs N                            | 66.585  | 42.8764   | 10.303     | 1         |
| cg00412675  | GATA4                               | 0.00033888        | 0.000338875          | 0.251277           | -3.97967                     | T down vs N                            | 20.557  | 17.8679   | 13.9069    | 1         |
| cg00413426  | C16orf81                            | 0.00032081        | 0.000320805          | 0.297742           | -3.35862                     | T down vs N                            | 20.799  | 13.7477   | 10.5758    | 1         |
| cg00414166  | ALDH3B1;ALDH3B1;ALDH3B1             | 0.007039          | 0.007039             | 0.316781           | -3.15676                     | T down vs N                            | 9.5424  | 12.377    | 20.7527    | 1         |
| cg00414292  | TRH                                 | 3.57E-05          | 3.57E-05             | 5.6724             | 5.6724                       | T up vs N                              | 32.002  | 28.2141   | 14.1062    | 1         |
| cg00414384  | MTL5;MTL5                           | 6.61E-06          | 6.61E-06             | 9.92516            | 9.92516                      | T up vs N                              | 42.99   | 49.3349   | 18.3613    | 1         |
| cg00415939  | PICALM;PICALM                       | 6.18E-05          | 6.18E-05             | 0.225698           | -4.4307                      | T down vs N                            | 28.899  | 20.7536   | 11.4904    | 1         |
| cg00416882  | PIAS2;PIAS2                         | 0.00028491        | 0.000284912          | 0.32134            | -3.11197                     | T down vs N                            | 21.328  | 12.0712   | 9.05587    | 1         |
| cg00420929  | PGPEP1                              | 0.00063746        | 0.00063746           | 0.275238           | -3.63322                     | T down vs N                            | 17.892  | 15.5891   | 13.9409    | 1         |
| cg00420997  | C8orf75                             | 0.0004847         | 0.000484698          | 0.311151           | -3.21388                     | T down vs N                            | 19.021  | 12.7661   | 10.7386    | 1         |
| cg00421089  | MYH1                                | 5.82E-06          | 5.82E-06             | 0.184402           | -5.42294                     | T down vs N                            | 43.919  | 26.7709   | 9.75278    | 1         |
| cg00421164  | RREB1;RREB1;RREB1;RREB1             | 0.00053045        | 0.000530452          | 0.290634           | -3.44075                     | T down vs N                            | 19.247  | 13.4602   | 10.4903    | 1         |
| cg00421693  | TNFAIP8                             | 3.87E-06          | 3.87E-06             | 0.226666           | -4.41179                     | T down vs N                            | 46.992  | 20.6345   | 7.02565    | 1         |
| cg00423068  | SPATC1;SPATC1                       | 0.0004475         | 0.000447495          | 0.290851           | -3.43819                     | T down vs N                            | 19.358  | 14.2842   | 11.8066    | 1         |
| cg00423185  | ORS2K1                              | 0.00418443        | 0.00418443           | 0.326305           | -3.06462                     | T down vs N                            | 11.132  | 11.7473   | 16.8837    | 1         |
| cg00423453  | ORS1B6                              | 1.55E-05          | 1.55E-05             | 0.162065           | -6.17035                     | T down vs N                            | 37.144  | 31.0162   | 13.3604    | 1         |
| cg00423655  | ZPLD1                               | 8.94E-05          | 8.94E-05             | 0.328348           | -3.04555                     | T down vs N                            | 26.938  | 11.6167   | 6.89983    | 1         |
| cg00424353  | SORCS2                              | 9.79E-05          | 9.79E-05             | 0.290885           | -3.43779                     | T down vs N                            | 26.464  | 14.2815   | 8.63465    | 1         |
| cg00425636  | SIGLEC15                            | 7.88E-05          | 7.88E-05             | 0.291803           | -3.42698                     | T down vs N                            | 27.595  | 14.2088   | 8.23859    | 1         |
| cg00425918  | NKX2-6                              | 0.00506398        | 0.00506398           | 5.85558            | 5.85558                      | T up vs N                              | 10.536  | 29.257    | 44.4289    | 1         |
| cg00428601  | CNN2                                | 1.25E-05          | 1.25E-05             | 10.3391            | 10.3391                      | T up vs N                              | 38.55   | 51.1072   | 21.2118    | 1         |
| cg00431427  | SLC24A1                             | 2.32E-05          | 2.32E-05             | 0.308852           | -3.2378                      | T down vs N                            | 34.591  | 12.9288   | 5.98019    | 1         |
| cg00431549  | MGP                                 | 0.00123478        | 0.00123478           | 0.257869           | -3.87794                     | T down vs N                            | 15.325  | 17.2042   | 17.9616    | 1         |
| cg00431602  | SAT1;SAT1                           | 0.0009497         | 0.000949704          | 0.193544           | -5.16678                     | T down vs N                            | 16.318  | 25.2604   | 24.7681    | 1         |
| cg00433296  | SLC39A14;SLC39A14;SLC39A14;SLC39A14 | 0.00126839        | 0.00126839           | 3.91274            | 3.91274                      | T up vs N                              | 15.649  | 16.4064   | 15.7265    | 1         |
| cg00433709  | A14                                 | 0.00041558        | 0.000415577          | 0.304157           | -3.28778                     | T down vs N                            | 19.673  | 13.2681   | 10.7911    | 1         |
| cg00435173  | ZNRF1                               | 0.00308016        | 0.00308016           | 0.277138           | -3.6083                      | T down vs N                            | 12.122  | 15.4233   | 20.3567    | 1         |
| cg00436282  | RAB5C;RAB5C                         | 0.00121571        | 0.00121571           | 0.236308           | -4.23176                     | T down vs N                            | 15.383  | 19.4923   | 20.2738    | 1         |
| cg00436476  | STATH;STATH                         | 0.00144633        | 0.00144633           | 10.2886            | 10.2886                      | T up vs N                              | 14.744  | 50.8933   | 55.2307    | 1         |
| cg00438616  | HIST1H4F                            | 0.00013195        | 0.000131951          | 0.108679           | -9.20143                     | T down vs N                            | 24.959  | 46.1335   | 29.5738    | 1         |
| cg00440217  | NRG4                                | 1.84E-06          | 1.84E-06             | 0.19283            | -5.18591                     | T down vs N                            | 53.036  | 25.3742   | 7.65494    | 1         |
| cg00442112  | COL9A1;COL9A1                       | 0.00107774        | 0.00107774           | 0.292594           | -3.4177                      | T down vs N                            | 15.836  | 14.1463   | 14.2933    | 1         |
| cg00443111  | CYT11                               | 9.66E-05          | 9.66E-05             | 0.307926           | -3.24754                     | T down vs N                            | 26.533  | 12.995    | 7.83637    | 1         |
| cg00443307  | TEKT4                               | 0.00038952        | 0.000389522          | 0.324815           | -3.07867                     | T down vs N                            | 19.951  | 11.8435   | 9.49811    | 1         |
| cg00443307  | KLRG1                               | 0.00038952        | 0.000389522          | 0.324815           | -3.07867                     | T down vs N                            | 19.951  | 11.8435   | 9.49811    | 1         |
| cg00444390  | OR10A6                              | 0.00015056        | 0.000150557          | 0.134766           | -7.42029                     | T down vs N                            | 24.311  | 37.6229   | 24.7608    | 1         |
| cg00445126  | LOC100132215                        | 1.23E-05          | 1.23E-05             | 12.4267            | 12.4267                      | T up vs N                              | 38.651  | 59.4718   | 24.6191    | 1         |
| cg00445232  | SMAD3;SMAD3;SMAD3;SMAD3             | 0.00080477        | 0.000804768          | 0.285723           | -3.49989                     | T down vs N                            | 16.962  | 14.6987   | 13.8651    | 1         |
| cg00445959  | XPO6                                | 4.89E-05          | 4.89E-05             | 0.212529           | -4.70525                     | T down vs N                            | 30.202  | 22.4638   | 11.9006    | 1         |
| cg00446235  | TSTD1;TSTD1;TSTD1                   | 5.26E-06          | 5.26E-06             | 7.33697            | 7.33697                      | T up vs N                              | 44.66   | 37.2001   | 13.3275    | 1         |
| cg00446472  | CBFA2T3                             | 5.03E-07          | 5.03E-07             | 0.242357           | -4.12614                     | T down vs N                            | 64.962  | 18.8153   | 4.63418    | 1         |
| cg00446763  | MUC13                               | 0.00021967        | 0.000219672          | 0.2303             | -4.34215                     | T down vs N                            | 22.515  | 20.1945   | 14.3511    | 1         |
| cg00447052  | SCRT1                               | 1.11E-05          | 1.11E-05             | 13.6055            | 13.6055                      | T up vs N                              | 39.347  | 63.8264   | 25.954     | 1         |
| cg00447277  | CTNS;CTNS                           | 0.00151794        | 0.00151794           | 0.333081           | -3.00227                     | T down vs N                            | 14.568  | 11.3201   | 12.4328    | 1         |
| cg00448707  | DIRAS3                              | 2.98E-05          | 2.98E-05             | 4.78585            | 4.78585                      | T up vs N                              | 33.067  | 22.9593   | 11.1094    | 1         |
| cg00448761  | RFX2;RFX2                           | 0.00021084        | 0.000210836          | 0.307208           | -3.25512                     | T down vs N                            | 22.706  | 13.0465   | 9.19345    | 1         |
| cg00448814  | NKAPL                               | 2.35E-06          | 2.35E-06             | 3.58955            | 3.58955                      | T up vs N                              | 50.965  | 15.2982   | 4.80279    | 1         |
| cg00449868  | ZC3H12D                             | 8.18E-06          | 8.18E-06             | 0.13223            | -7.56258                     | T down vs N                            | 41.469  | 38.3393   | 14.7927    | 1         |
| cg00451651  | VPS13B;VPS13B                       | 2.15E-06          | 2.15E-06             | 0.295382           | -3.38545                     | T down vs N                            | 51.713  | 13.9288   | 4.30957    | 1         |
| cg00460589  | PHACTR1                             | 4.79E-06          | 4.79E-06             | 0.243132           | -4.113                       | T down vs N                            | 45.355  | 18.7307   | 6.60764    | 1         |
| cg00461311  | SVOP                                | 2.42E-06          | 2.42E-06             | 0.184143           | -5.43057                     | T down vs N                            | 50.721  | 26.8155   | 8.45905    | 1         |
| cg00462362  | EPS8L1;EPS8L1                       | 0.00544877        | 0.00544877           | 0.266402           | -3.75373                     | T down vs N                            | 10.311  | 16.3877   | 25.4286    | 1         |
| cg00462430  | SIPA1L2                             | 6.92E-05          | 6.92E-05             | 0.226839           | -4.40841                     | T down vs N                            | 28.289  | 20.6131   | 11.6586    | 1         |
| cg00463367  | GATA3;GATA3                         | 0.00221998        | 0.00221998           | 0.278162           | -3.59503                     | T down vs N                            | 13.226  | 15.3348   | 18.5511    | 1         |
| cg00463577  | C6orf150;C6orf150                   | 0.00180063        | 0.00180063           | 0.320831           | -3.11691                     | T down vs N                            | 13.957  | 12.1049   | 13.877     | 1         |
| cg00463746  | ROR1;ROR1                           | 7.40E-06          | 7.40E-06             | 0.169528           | -5.89871                     | T down vs N                            | 42.18   | 29.5004   | 11.1903    | 1         |
| cg00467296  | OR51A7                              | 0.00274299        | 0.00274299           | 0.321495           | -3.11047                     | T down vs N                            | 12.508  | 12.0609   | 15.4285    | 1         |

| Probeset ID | UCSC_REFGENE_NAME                                                            | p-value<br>(Type) | p-value (T vs.<br>N) | Ratio (T<br>vs. N) | Fold-<br>Change (T<br>vs. N) | Fold-Change (T vs.<br>N) (Description) | F(Type) | SS (Type) | SS (Error) | F (Error) |
|-------------|------------------------------------------------------------------------------|-------------------|----------------------|--------------------|------------------------------|----------------------------------------|---------|-----------|------------|-----------|
| cg00468320  | TMEM74                                                                       | 3.53E-05          | 3.53E-05             | 0.263678           | -3.7925                      | T down vs N                            | 32.062  | 16.6433   | 8.30551    | 1         |
| cg00468400  | PENK;PENK                                                                    | 1.18E-05          | 1.18E-05             | 0.298123           | -3.35432                     | T down vs N                            | 38.97   | 13.7186   | 5.63251    | 1         |
| cg00470341  | PDE1A;PDE1A                                                                  | 0.00143544        | 0.00143544           | 0.204134           | -4.89875                     | T down vs N                            | 14.771  | 23.6482   | 25.6158    | 1         |
| cg00471159  | LAMB1                                                                        | 0.00534979        | 0.00534979           | 3.08339            | 3.08339                      | T up vs N                              | 10.367  | 11.8758   | 18.3279    | 1         |
| cg00471368  | PLCG2                                                                        | 0.00012312        | 0.000123122          | 0.316349           | -3.16107                     | T down vs N                            | 25.304  | 12.4063   | 7.84477    | 1         |
| cg00472783  | EXOC4;EXOC4                                                                  | 0.00098345        | 0.000983452          | 0.304571           | -3.2833                      | T down vs N                            | 16.184  | 13.2378   | 13.0873    | 1         |
| cg00472837  | SIRPD                                                                        | 0.00039444        | 0.00039444           | 0.240297           | -4.16151                     | T down vs N                            | 19.897  | 19.0426   | 15.3131    | 1         |
| cg00474004  | IFNA14;IFNA14                                                                | 7.94E-05          | 7.94E-05             | 3.32797            | -3.05008                     | T down vs N                            | 27.557  | 11.6477   | 6.76274    | 1         |
| cg00475973  | FTSJ2                                                                        | 0.00045533        | 0.000455327          | 0.302761           | -3.30293                     | T down vs N                            | 19.284  | 13.3709   | 11.0938    | 1         |
| cg00476955  | TRPC2                                                                        | 0.00099878        | 0.000998784          | 0.31862            | -3.13853                     | T down vs N                            | 16.125  | 12.2526   | 12.1577    | 1         |
| cg00478884  | RNASE10                                                                      | 0.00018021        | 0.000180205          | 0.217307           | -4.60179                     | T down vs N                            | 23.446  | 21.8235   | 14.8929    | 1         |
| cg00480381  | A2BP1;A2BP1;A2BP1;A2BP1;A2BP1;A2BP1;A2BP1;A2BP1                              | 0.00181209        | 0.00181209           | 0.298834           | -3.34634                     | T down vs N                            | 13.934  | 13.6647   | 15.6903    | 1         |
| cg00481637  | OR51M1                                                                       | 1.15E-05          | 1.15E-05             | 0.242175           | -4.12924                     | T down vs N                            | 39.097  | 18.8353   | 7.70817    | 1         |
| cg00483825  | C10orf93                                                                     | 0.00026248        | 0.000262479          | 0.326375           | -3.06396                     | T down vs N                            | 21.698  | 11.7428   | 8.65922    | 1         |
| cg00484358  | ALX3                                                                         | 0.00465028        | 0.00465028           | 3.32997            | 3.32997                      | T up vs N                              | 10.801  | 13.5539   | 20.0787    | 1         |
| cg00485748  | SLC12A5;SLC12A5                                                              | 0.00113142        | 0.00113142           | 0.17286            | -5.78502                     | T down vs N                            | 15.652  | 28.8569   | 29.4982    | 1         |
| cg00486525  | MMADHC                                                                       | 0.00092375        | 0.000923745          | 0.19351            | -5.16769                     | T down vs N                            | 16.425  | 25.2658   | 24.6123    | 1         |
| cg00487737  | ACP5;ACP5;ACP5;ACP5;ACP5;ACP5                                                | 0.00028119        | 0.000281186          | 5.00509            | 5.00509                      | T up vs N                              | 21.387  | 24.2918   | 18.1734    | 1         |
| cg00491350  | Cxorf36                                                                      | 2.36E-05          | 2.36E-05             | 0.294466           | -3.39597                     | T down vs N                            | 34.477  | 13.9999   | 6.49697    | 1         |
| cg00491523  | A2BP1;A2BP1;A2BP1                                                            | 0.00656336        | 0.00656336           | 0.304314           | -3.28608                     | T down vs N                            | 9.7499  | 13.2566   | 21.7547    | 1         |
| cg00492070  | CD47;CD47;CD47                                                               | 1.63E-05          | 1.63E-05             | 3.44489            | 3.44489                      | T up vs N                              | 36.808  | 14.3293   | 6.2287     | 1         |
| cg00494337  | ID1;ID1;ID1                                                                  | 8.81E-06          | 8.81E-06             | 0.324843           | -3.07841                     | T down vs N                            | 40.949  | 11.8417   | 4.62686    | 1         |
| cg00494544  | PPP1R2                                                                       | 1.40E-05          | 1.217955             | 0.217955           | -4.58811                     | T down vs N                            | 37.824  | 21.7385   | 9.19576    | 1         |
| cg00497909  | CRCP;CRCP;CRCP;CRCP;CRCP                                                     | 0.00142212        | 0.00142212           | 3.41517            | 3.41517                      | T up vs N                              | 14.805  | 14.1292   | 15.2697    | 1         |
| cg00498289  | GCKR                                                                         | 3.41E-06          | 3.41E-06             | 0.302032           | -3.31091                     | T down vs N                            | 47.978  | 13.4249   | 4.477      | 1         |
| cg00498401  | EVPL                                                                         | 3.15E-05          | 3.15E-05             | 0.309804           | -3.22784                     | T down vs N                            | 32.733  | 12.8611   | 6.28654    | 1         |
| cg00501006  | SNORD115-29;SNORD115-11;SNORD115-43;SNORD115-36                              | 0.00012727        | 0.000127269          | 0.250181           | -3.99711                     | T down vs N                            | 25.139  | 17.9813   | 11.4446    | 1         |
| cg00503298  | CYP4B1;CYP4B1                                                                | 0.00013785        | 0.000137852          | 0.178118           | -5.61425                     | T down vs N                            | 24.743  | 27.8801   | 18.0286    | 1         |
| cg00504075  | GON4L;GON4L                                                                  | 0.00012776        | 0.000127758          | 0.216936           | -4.60965                     | T down vs N                            | 25.119  | 21.8723   | 13.9317    | 1         |
| cg00504705  | PCDHA6;PCDHA2;PCDHA1;PCDHA7;PCDHA1;PCDHA8;PCDHA6;PCDHA5;PCDHA8;PCDHA3;PCDHA4 | 0.00066974        | 0.000669735          | 5.91894            | 5.91894                      | T up vs N                              | 17.692  | 29.6143   | 26.7817    | 1         |
| cg00505073  | C20orf165                                                                    | 0.00020057        | 0.00020057           | 0.232532           | -4.30048                     | T down vs N                            | 22.939  | 19.9301   | 13.901     | 1         |
| cg00506198  | B3GNT3                                                                       | 0.00675895        | 0.00675895           | 0.291708           | -3.42808                     | T down vs N                            | 9.6626  | 14.2162   | 23.5403    | 1         |
| cg00507135  | ACBD5;ACBD5;ACBD5                                                            | 0.0002267         | 0.000226698          | 0.274865           | -3.63815                     | T down vs N                            | 22.369  | 15.6219   | 11.174     | 1         |
| cg00507154  | C19orf76;C19orf76                                                            | 0.00035959        | 0.000359588          | 4.61109            | 4.61109                      | T up vs N                              | 20.298  | 21.8812   | 17.2483    | 1         |
| cg00507915  | ZSCAN4                                                                       | 0.00019001        | 0.00019001           | 0.257081           | -3.88982                     | T down vs N                            | 23.194  | 17.282    | 11.9215    | 1         |
| cg00508975  | LRR3B                                                                        | 7.34E-05          | 7.34E-05             | 4.94355            | 4.94355                      | T up vs N                              | 27.977  | 23.92     | 13.6797    | 1         |
| cg00509610  | TSEN2;TSEN2;TSEN2;TSEN2;TSEN2                                                | 6.06E-05          | 6.06E-05             | 0.224999           | -4.44446                     | T down vs N                            | 29.011  | 20.8401   | 11.4936    | 1         |
| cg00510149  | MRV1;MRV1;MRV1;MRV1                                                          | 0.0001036         | 0.000103604          | 0.277281           | -3.60645                     | T down vs N                            | 26.176  | 15.4109   | 9.41999    | 1         |
| cg00510507  | ANK3;ANK3;ANK3                                                               | 2.17E-05          | 2.17E-05             | 3.19325            | 3.19325                      | T up vs N                              | 35.006  | 12.6257   | 5.77071    | 1         |
| cg00510598  | IRX6                                                                         | 6.97E-05          | 6.97E-05             | 5.58241            | 5.58241                      | T up vs N                              | 28.255  | 27.6966   | 15.6838    | 1         |
| cg00513316  | CRABP1                                                                       | 0.00013879        | 0.000138786          | 3.08725            | 3.08725                      | T up vs N                              | 24.71   | 11.9021   | 7.70683    | 1         |
| cg00514486  | CDH29                                                                        | 5.20E-08          | 5.20E-08             | 0.296959           | -3.36747                     | T down vs N                            | 91.171  | 13.8075   | 2.42315    | 1         |
| cg00515455  | SPACA1                                                                       | 1.57E-05          | 1.57E-05             | 0.188936           | -5.29281                     | T down vs N                            | 37.056  | 26.0072   | 11.2294    | 1         |
| cg00516030  | CTGF                                                                         | 7.16E-06          | 7.16E-06             | 0.213214           | -4.69012                     | T down vs N                            | 42.409  | 22.3705   | 8.43985    | 1         |
| cg00516867  | OPN1SW                                                                       | 7.56E-06          | 7.56E-06             | 0.16087            | -6.21619                     | T down vs N                            | 42.024  | 31.269    | 11.9051    | 1         |
| cg00517511  | TBX3;TBX3                                                                    | 0.00021207        | 0.000212065          | 0.28682            | -3.48651                     | T down vs N                            | 22.679  | 14.6089   | 10.3067    | 1         |
| cg00519299  | GPR44                                                                        | 4.57E-05          | 4.57E-05             | 0.321831           | -3.10722                     | T down vs N                            | 30.586  | 12.0387   | 6.29772    | 1         |
| cg00520378  | CTU2;CTU2;RNF166                                                             | 0.00036425        | 0.000364253          | 0.279715           | -3.57506                     | T down vs N                            | 20.242  | 15.2016   | 12.0162    | 1         |
| cg00525874  | SLC6A3                                                                       | 1.49E-06          | 1.49E-06             | 0.208362           | -4.79935                     | T down vs N                            | 54.83   | 23.042    | 6.72393    | 1         |
| cg00528572  | MTNR1B                                                                       | 0.00564068        | 0.00564068           | 4.07421            | 4.07421                      | T up vs N                              | 10.206  | 18.4805   | 28.9725    | 1         |
| cg00530492  | HCG9                                                                         | 1.02E-05          | 1.02E-05             | 36.8796            | 36.8796                      | T up vs N                              | 39.936  | 121.902   | 48.8387    | 1         |
| cg00531748  | KDR                                                                          | 0.00046845        | 0.000468449          | 0.264243           | -3.78439                     | T down vs N                            | 19.164  | 16.5899   | 13.8507    | 1         |
| cg00534163  | KIAA0562                                                                     | 0.00060245        | 0.000602445          | 0.300018           | -3.33313                     | T down vs N                            | 18.121  | 13.5753   | 11.9862    | 1         |
| cg00535683  | SPRR2C                                                                       | 7.18E-05          | 7.18E-05             | 0.190964           | -5.23658                     | T down vs N                            | 28.095  | 25.6749   | 14.6217    | 1         |
| cg00536792  | KLHL31;KLHL31                                                                | 0.00014686        | 0.000146859          | 3.43329            | 3.43329                      | T up vs N                              | 24.433  | 14.2512   | 9.33262    | 1         |
| cg00538017  | LGSN;LGSN;LGSN;LGSN                                                          | 0.00086725        | 0.000867254          | 0.244693           | -4.08675                     | T down vs N                            | 16.669  | 18.5615   | 17.8161    | 1         |
| cg00540540  | ODZ2                                                                         | 2.67E-06          | 2.67E-06             | 0.213319           | -4.68781                     | T down vs N                            | 53.071  | 21.0412   | 5.94713    | 1         |
| cg00540941  | HLA-DOA                                                                      | 0.00381528        | 0.00381528           | 0.272716           | -3.66682                     | T down vs N                            | 11.427  | 15.8124   | 22.1412    | 1         |
| cg00545916  | HSF5                                                                         | 3.12E-06          | 3.12E-06             | 4.65677            | 4.65677                      | T up vs N                              | 48.674  | 22.1644   | 7.28585    | 1         |
| cg00546897  | LOC284837                                                                    | 0.00012854        | 0.000128543          | 0.213859           | -4.67599                     | T down vs N                            | 26.092  | 20.9724   | 12.0567    | 1         |
| cg00548296  | GCKR                                                                         | 0.00031485        | 0.000314853          | 0.251381           | -3.97802                     | T down vs N                            | 20.882  | 17.8572   | 13.6826    | 1         |
| cg00549475  | TMEM220                                                                      | 0.00012039        | 0.000120394          | 0.232006           | -4.31024                     | T down vs N                            | 25.416  | 19.9921   | 12.5856    | 1         |
| cg00552318  | CHADL                                                                        | 3.47E-05          | 3.47E-05             | 3.68893            | 3.68893                      | T up vs N                              | 32.176  | 15.959    | 7.93588    | 1         |
| cg00553355  | CUL7;CUL7                                                                    | 5.36E-05          | 5.36E-05             | 0.151449           | -6.60286                     | T down vs N                            | 29.687  | 33.3685   | 17.9842    | 1         |
| cg00554413  | TACSTD2                                                                      | 3.45E-06          | 3.45E-06             | 6.91777            | 6.91777                      | T up vs N                              | 47.894  | 35.0362   | 11.7047    | 1         |
| cg00554948  | DAZAP2;DAZAP2;DAZAP2;DAZAP2;DAZAP2;DAZAP2                                    | 0.00010257        | 0.000102569          | 0.244663           | -4.08726                     | T down vs N                            | 26.227  | 18.5648   | 11.3256    | 1         |
| cg00556408  | ZAP2;DAZAP2                                                                  | 5.35E-05          | 5.35E-05             | 0.317879           | -3.14586                     | T down vs N                            | 29.692  | 12.3026   | 6.62935    | 1         |
| cg00556408  | TMPRSS6                                                                      | 5.35E-05          | 5.35E-05             | 0.317879           | -3.14586                     | T down vs N                            | 29.692  | 12.3026   | 6.62935    | 1         |

| Probeset ID | UCSC_REFGENE_NAME             | p-value<br>(Type) | p-value (T vs.<br>N) | Ratio (T<br>vs. N) | Fold-<br>Change (T<br>vs. N) | Fold-Change (T vs.<br>N) (Description) | F(Type) | SS (Type) | SS (Error) | F (Error) |
|-------------|-------------------------------|-------------------|----------------------|--------------------|------------------------------|----------------------------------------|---------|-----------|------------|-----------|
| cg00556816  | KIAA0406                      | 0.00120161        | 0.00120161           | 0.329748           | -3.03262                     | T down vs N                            | 15.427  | 11.5281   | 11.9565    | 1         |
| cg00557308  | MEGF11                        | 0.00675588        | 0.00675588           | 3.32042            | 3.32042                      | T up vs N                              | 9.6639  | 13.4893   | 22.3336    | 1         |
| cg00557402  | FAM55D;FAM55D                 | 0.00017493        | 0.000174927          | 0.316341           | -3.16115                     | T down vs N                            | 23.588  | 12.4069   | 8.41593    | 1         |
| cg00561338  | FKSG83                        | 1.63E-06          | 1.63E-06             | 0.095278           | -10.4956                     | T down vs N                            | 62.093  | 46.015    | 10.3749    | 1         |
| cg00563045  | GTF2H4                        | 1.94E-06          | 1.94E-06             | 0.238272           | -4.19688                     | T down vs N                            | 52.571  | 19.2693   | 5.86458    | 1         |
| cg00563229  | XKR8                          | 0.00177961        | 0.00177961           | 7.24657            | 7.24657                      | T up vs N                              | 13.998  | 36.7387   | 41.9918    | 1         |
| cg00564163  | STEAP4                        | 0.00152657        | 0.00152657           | 5.29434            | 5.29434                      | T up vs N                              | 14.548  | 26.0162   | 28.6137    | 1         |
| cg00565882  | CYP1B1                        | 0.00439459        | 0.00439459           | 4.03381            | 4.03381                      | T up vs N                              | 10.978  | 18.2192   | 26.5542    | 1         |
| cg00568984  | STXBP2;STXBP2                 | 0.00056796        | 0.000567963          | 0.181939           | -5.49635                     | T down vs N                            | 18.363  | 27.1984   | 23.699     | 1         |
| cg00572387  | SIRPB2;SIRPB2                 | 9.80E-05          | 9.80E-05             | 0.220599           | -4.53311                     | T down vs N                            | 26.459  | 21.3957   | 12.9383    | 1         |
| cg00572504  | ATOH8                         | 0.00099181        | 0.000991811          | 0.291575           | -3.42965                     | T down vs N                            | 16.152  | 14.2268   | 14.0932    | 1         |
| cg00572810  | SPINK8                        | 0.0001075         | 0.000107498          | 0.229445           | -4.35834                     | T down vs N                            | 25.988  | 20.297    | 12.4964    | 1         |
| cg00574740  | LMO7                          | 0.00242472        | 0.00242472           | 3.02009            | 3.02009                      | T up vs N                              | 12.924  | 11.4422   | 14.1656    | 1         |
| cg00574913  | ESF1                          | 6.49E-05          | 6.49E-05             | 0.296194           | -3.37616                     | T down vs N                            | 28.635  | 13.8662   | 7.74796    | 1         |
| cg00575744  | HLA-DMB;HLA-DMB               | 3.65E-06          | 3.65E-06             | 0.256774           | -3.89447                     | T down vs N                            | 47.441  | 17.3124   | 5.83875    | 1         |
| cg00576086  | TERT;TERT                     | 0.00016326        | 0.000163264          | 0.259798           | -3.84915                     | T down vs N                            | 23.919  | 17.0155   | 11.3823    | 1         |
| cg00576550  | HTR3D;HTR3D;HTR3D             | 8.20E-05          | 8.20E-05             | 0.27961            | -3.57641                     | T down vs N                            | 27.391  | 15.2106   | 8.88503    | 1         |
| cg00582337  | HSPB9;HSPB9;KAT2A             | 6.11E-06          | 6.11E-06             | 4.29463            | 4.29463                      | T up vs N                              | 43.562  | 19.8929   | 7.30648    | 1         |
| cg00582864  | MIR502;CLCN5;CLCN5            | 0.00014397        | 0.000143973          | 0.312635           | -3.19862                     | T down vs N                            | 24.53   | 12.6623   | 8.25923    | 1         |
| cg00584450  | FOXL1;FOXL1                   | 6.83E-06          | 6.83E-06             | 11.4958            | 11.4958                      | T up vs N                              | 42.748  | 55.8531   | 20.905     | 1         |
| cg00584456  | FAM66B                        | 5.53E-06          | 5.53E-06             | 0.149145           | -6.7049                      | T down vs N                            | 44.294  | 33.9129   | 12.2501    | 1         |
| cg00587922  | KIAA1949;KIAA1949             | 2.50E-06          | 2.50E-06             | 0.275715           | -3.62693                     | T down vs N                            | 50.461  | 15.5473   | 4.9297     | 1         |
| cg00588731  | MMP26                         | 0.00291595        | 0.00291595           | 0.245359           | -4.07567                     | T down vs N                            | 12.304  | 18.49     | 24.0447    | 1         |
| cg00589251  | ACPP;ACPP                     | 0.00047161        | 0.000471605          | 0.257738           | -3.87991                     | T down vs N                            | 19.136  | 17.2171   | 14.3956    | 1         |
| cg00589541  | FNDC3B;FNDC3B                 | 0.00085196        | 0.000851955          | 0.259597           | -3.85213                     | T down vs N                            | 16.739  | 17.0351   | 16.2832    | 1         |
| cg00590063  | B3GNT3                        | 3.55E-06          | 3.55E-06             | 0.083214           | -12.0172                     | T down vs N                            | 47.663  | 57.9005   | 19.4368    | 1         |
| cg00590260  | DIP2C                         | 0.00324825        | 0.00324825           | 4.76821            | 4.76821                      | T up vs N                              | 11.948  | 22.8511   | 30.6012    | 1         |
| cg00595243  | RPS12;SNORD100;SNORA33        | 2.64E-05          | 2.64E-05             | 0.311242           | -3.21293                     | T down vs N                            | 33.799  | 12.7597   | 6.04022    | 1         |
| cg00598956  | SHROOM3                       | 0.00212299        | 0.00212299           | 0.322488           | -3.10089                     | T down vs N                            | 13.38   | 11.9955   | 14.3441    | 1         |
| cg00599219  | MEFV                          | 0.003172          | 0.003172             | 0.255069           | -3.92051                     | T down vs N                            | 12.026  | 17.4825   | 23.2601    | 1         |
| cg00599328  | PEX1                          | 2.08E-06          | 2.08E-06             | 0.316199           | -3.16257                     | T down vs N                            | 51.974  | 12.4166   | 3.82242    | 1         |
| cg00599463  | C20orf160                     | 9.83E-06          | 9.83E-06             | 0.195833           | -5.10638                     | T down vs N                            | 40.191  | 24.8999   | 9.91274    | 1         |
| cg00599564  | HCG9                          | 0.00027146        | 0.000271459          | 5.0145             | 5.0145                       | T up vs N                              | 21.545  | 24.3485   | 18.0817    | 1         |
| cg00599812  | ATAD3C                        | 2.77E-06          | 2.77E-06             | 0.102125           | -9.79188                     | T down vs N                            | 52.763  | 45.8875   | 13.0453    | 1         |
| cg00601648  | ADCY8                         | 0.00015744        | 0.000157443          | 0.275153           | -3.63434                     | T down vs N                            | 24.094  | 15.5966   | 10.3571    | 1         |
| cg00605362  | C16orf71                      | 2.52E-05          | 2.52E-05             | 0.29422            | -3.39882                     | T down vs N                            | 34.083  | 14.0191   | 6.58121    | 1         |
| cg00610577  | ETV6                          | 0.00664088        | 0.00664088           | 0.185297           | -5.39674                     | T down vs N                            | 9.7149  | 26.6178   | 43.8382    | 1         |
| cg00612625  | HPSE2;HPSE2;HPSE2;HPSE2       | 1.90E-06          | 1.90E-06             | 0.273742           | -3.65308                     | T down vs N                            | 52.722  | 15.7211   | 4.77099    | 1         |
| cg00612905  | JPH3                          | 1.93E-06          | 1.93E-06             | 0.108566           | -9.21097                     | T down vs N                            | 52.6    | 46.1766   | 14.046     | 1         |
| cg00613113  | LOC283050;LOC283050;LOC283050 | 1.92E-06          | 1.92E-06             | 0.245689           | -4.07018                     | T down vs N                            | 52.658  | 18.4545   | 5.60733    | 1         |
| cg00614182  | NRG1                          | 0.0013756         | 0.0013756            | 6.42712            | 6.42712                      | T up vs N                              | 14.927  | 32.4215   | 34.7529    | 1         |
| cg00617568  | B4GALNT2;B4GALNT2             | 0.00010761        | 0.00010761           | 0.235991           | -4.23745                     | T down vs N                            | 25.982  | 19.5287   | 12.0258    | 1         |
| cg00620024  | PPP6C;PPP6C;PPP6C             | 7.23E-06          | 7.23E-06             | 0.107027           | -9.34345                     | T down vs N                            | 42.342  | 46.7725   | 17.6741    | 1         |
| cg00620190  | HIST1H4F                      | 3.49E-05          | 3.49E-05             | 4.76858            | 4.76858                      | T up vs N                              | 32.127  | 22.8534   | 11.3814    | 1         |
| cg00620464  | KIAA1715                      | 0.0003082         | 0.000308199          | 0.149444           | -6.69148                     | T down vs N                            | 20.976  | 33.8416   | 25.813     | 1         |
| cg00622375  | SVIL;MIR938;SVIL              | 2.53E-05          | 2.53E-05             | 0.215403           | -4.64247                     | T down vs N                            | 34.049  | 22.0759   | 10.3736    | 1         |
| cg00624737  | FOXL1;FOXL1                   | 0.00016856        | 0.000168558          | 7.08893            | 7.08893                      | T up vs N                              | 23.765  | 35.9272   | 24.1882    | 1         |
| cg00629088  | KRT33A                        | 3.25E-05          | 3.25E-05             | 0.251166           | -3.98143                     | T down vs N                            | 32.562  | 17.8794   | 8.78553    | 1         |
| cg00629688  | GRIA4;GRIA4;GRIA4             | 5.23E-05          | 5.23E-05             | 0.105183           | -9.50727                     | T down vs N                            | 29.818  | 47.5029   | 25.4893    | 1         |
| cg00630724  | PITX3                         | 0.00018105        | 0.000181045          | 51.4153            | 51.4153                      | T up vs N                              | 23.424  | 145.392   | 99.3132    | 1         |
| cg00631482  | RAP1GAP;RAP1GAP;RAP1GAP       | 1.21E-05          | 1.21E-05             | 15.1352            | 15.1352                      | T up vs N                              | 38.801  | 69.143    | 28.5122    | 1         |
| cg00631759  | ADAMTS2                       | 0.00028986        | 0.000289864          | 0.300221           | -3.33088                     | T down vs N                            | 21.25   | 13.5601   | 10.2099    | 1         |
| cg00632853  | ASB6;ASB6                     | 8.28E-06          | 8.28E-06             | 0.299651           | -3.33721                     | T down vs N                            | 41.377  | 13.603    | 5.26012    | 1         |
| cg00636194  | WFDC6                         | 0.00066614        | 0.000666142          | 0.2242             | -4.4603                      | T down vs N                            | 18.265  | 19.7079   | 16.1854    | 1         |
| cg00637178  | ZNF622                        | 0.00143638        | 0.00143638           | 0.317231           | -3.15228                     | T down vs N                            | 14.769  | 12.3464   | 13.3758    | 1         |
| cg00637695  | SNCAIP                        | 6.67E-05          | 6.67E-05             | 0.262082           | -3.8156                      | T down vs N                            | 28.49   | 16.7953   | 9.43233    | 1         |
| cg00637795  | EFTUD1;FAM154B;EFTUD1         | 0.00010093        | 0.000100932          | 0.247566           | -4.03933                     | T down vs N                            | 26.309  | 18.255    | 11.1018    | 1         |
| cg00639447  | LRIT2                         | 0.00162239        | 0.00162239           | 0.288025           | -3.47193                     | T down vs N                            | 14.328  | 14.511    | 16.2041    | 1         |
| cg00639517  | MGMT                          | 1.21E-05          | 1.21E-05             | 0.082598           | -12.1069                     | T down vs N                            | 38.795  | 58.2473   | 24.0229    | 1         |
| cg00639615  | FANCI;FANCI                   | 0.00046505        | 0.000465046          | 3.4578             | 3.4578                       | T up vs N                              | 19.195  | 14.4161   | 12.0166    | 1         |
| cg00640053  | CNPY1                         | 0.00157214        | 0.00157214           | 0.171351           | -5.83599                     | T down vs N                            | 14.441  | 29.1461   | 32.2918    | 1         |
| cg00640314  | SNORD87;SNHG6                 | 5.26E-06          | 5.26E-06             | 0.127827           | -7.82309                     | T down vs N                            | 44.658  | 39.6336   | 14.1997    | 1         |
| cg00642460  | PFN3                          | 6.05E-06          | 6.05E-06             | 39.2357            | 39.2357                      | T up vs N                              | 43.623  | 126.124   | 46.259     | 1         |
| cg00642501  | NOP14                         | 0.00054845        | 0.000548453          | 0.287747           | -3.47527                     | T down vs N                            | 18.507  | 14.5335   | 12.565     | 1         |
| cg00643235  | TTRAP                         | 0.00010411        | 0.000104113          | 0.231656           | -4.31675                     | T down vs N                            | 26.151  | 20.0334   | 12.2572    | 1         |
| cg00643651  | KIF26B                        | 7.84E-05          | 7.84E-05             | 0.297472           | -3.36166                     | T down vs N                            | 27.622  | 13.7683   | 7.97536    | 1         |
| cg00643897  | ALK                           | 4.49E-06          | 4.49E-06             | 0.194242           | -5.14821                     | T down vs N                            | 45.849  | 25.1497   | 8.77656    | 1         |
| cg00644107  | PRSS27                        | 0.00450899        | 0.00450899           | 0.295818           | -3.38046                     | T down vs N                            | 10.897  | 13.8952   | 20.4019    | 1         |
| cg00647022  | UNC13A                        | 2.22E-06          | 2.22E-06             | 0.171646           | -5.82594                     | T down vs N                            | 51.427  | 29.0891   | 9.05016    | 1         |
| cg00648919  | WWTR1;WWTR1;WWTR1             | 2.80E-06          | 2.80E-06             | 4.51366            | 4.51366                      | T up vs N                              | 49.532  | 21.2741   | 6.872      | 1         |
| cg00650176  | C9orf135                      | 0.00077347        | 0.000773468          | 6.25332            | 6.25332                      | T up vs N                              | 17.118  | 31.4731   | 29.4173    | 1         |

| Probeset ID | UCSC_REFGENE_NAME               | p-value<br>(Type) | p-value (T vs.<br>N) | Ratio (T<br>vs. N) | Fold-<br>Change (T<br>vs. N) | Fold-Change (T vs.<br>N) (Description) | F(Type) | SS (Type) | SS (Error) | F (Error) |             |          |          |             |          |             |         |         |         |   |
|-------------|---------------------------------|-------------------|----------------------|--------------------|------------------------------|----------------------------------------|---------|-----------|------------|-----------|-------------|----------|----------|-------------|----------|-------------|---------|---------|---------|---|
| cg00651359  | PLXNA4;PLXNA4;PLXNA4            | 8.16E-06          | 8.16E-06             | 0.172487           | -5.79755                     | T down vs N                            | 41.487  | 28.9281   | 11.1566    | 1         |             |          |          |             |          |             |         |         |         |   |
| cg00653455  | ACTR8                           | 0.00011919        | 0.000119185          | 0.168588           | -5.93161                     | T down vs N                            | 25.466  | 29.6856   | 18.6509    | 1         |             |          |          |             |          |             |         |         |         |   |
| cg00658082  | RTKN                            | 3.15E-05          | 3.15E-05             | 5.65339            | 5.65339                      | T up vs N                              | 32.733  | 28.1051   | 13.7379    | 1         |             |          |          |             |          |             |         |         |         |   |
| cg00658590  | FHIT;FHIT                       | 0.00497627        | 0.00497627           | 0.272387           | -3.67124                     | T down vs N                            | 10.59   | 15.8417   | 23.9343    | 1         |             |          |          |             |          |             |         |         |         |   |
| cg00659129  | ASAP1                           | 1.95E-06          | 1.95E-06             | 0.229665           | -4.35417                     | T down vs N                            | 52.543  | 20.2706   | 6.17264    | 1         |             |          |          |             |          |             |         |         |         |   |
| cg00660232  | RSP1B                           | 0.00031831        | 0.000318307          | 0.312631           | -3.19866                     | T down vs N                            | 20.833  | 12.6626   | 9.72487    | 1         |             |          |          |             |          |             |         |         |         |   |
| cg00661399  | TNXB                            | 0.00451986        | 0.00451986           | 0.266153           | -3.75724                     | T down vs N                            | 10.89   | 16.4109   | 24.1123    | 1         |             |          |          |             |          |             |         |         |         |   |
| cg00663000  | FLAD1;FLAD1                     | 2.23E-06          | 2.23E-06             | 0.306223           | -3.26559                     | T down vs N                            | 51.397  | 13.1176   | 4.08354    | 1         |             |          |          |             |          |             |         |         |         |   |
| cg00665650  | PAIP2;PAIP2                     | 0.00023508        | 0.000235075          | 0.239898           | -4.16844                     | T down vs N                            | 22.202  | 19.087    | 13.7555    | 1         |             |          |          |             |          |             |         |         |         |   |
| cg00666640  | OR2T12                          | 3.31E-05          | 3.31E-05             | 0.201606           | -4.96018                     | T down vs N                            | 32.45   | 24.0206   | 11.8439    | 1         |             |          |          |             |          |             |         |         |         |   |
| cg00667789  | TACSTD2                         | 2.75E-05          | 2.75E-05             | 8.70347            | 8.70347                      | T up vs N                              | 33.563  | 43.8495   | 20.9039    | 1         |             |          |          |             |          |             |         |         |         |   |
| cg00668890  | TNFRSF1A                        | 0.00215211        | 0.00215211           | 0.284407           | -3.51609                     | T down vs N                            | 13.333  | 14.8072   | 17.769     | 1         |             |          |          |             |          |             |         |         |         |   |
| cg00670698  | GGCT                            | 0.00087124        | 0.000871241          | 0.286708           | -3.48786                     | T down vs N                            | 16.652  | 14.618    | 14.046     | 1         |             |          |          |             |          |             |         |         |         |   |
| cg00670915  | RPL31;RPL31;RPL31               | 0.0001368         | 0.000136801          | 0.220692           | -4.5312                      | T down vs N                            | 24.781  | 21.3837   | 13.8066    | 1         |             |          |          |             |          |             |         |         |         |   |
| cg00671823  | GTF3C1                          | 3.62E-05          | 3.62E-05             | 0.254881           | -3.92341                     | T down vs N                            | 31.914  | 17.5014   | 8.77435    | 1         |             |          |          |             |          |             |         |         |         |   |
| cg00673286  | AP3B2                           | 0.0009316         | 0.000931597          | 5.0369             | 5.0369                       | T up vs N                              | 16.392  | 24.4833   | 23.8975    | 1         |             |          |          |             |          |             |         |         |         |   |
| cg00673290  | APOB                            | 0.00011893        | 0.000118934          | 12.9886            | 12.9886                      | T up vs N                              | 25.477  | 61.5773   | 38.6717    | 1         |             |          |          |             |          |             |         |         |         |   |
| cg00673646  | MS4A6A;MS4A6A;MS4A6A;MS4A6A;    | 0.0001697         | 0.000169697          | 0.264303           | -3.78353                     | T down vs N                            | 23.733  | 16.5842   | 11.1806    | 1         |             |          |          |             |          |             |         |         |         |   |
|             | MS4A6A;MS4A6A                   |                   |                      |                    |                              |                                        |         |           |            |           |             |          |          |             |          |             |         |         |         |   |
|             | DGKH;DGKH                       |                   |                      |                    |                              |                                        |         |           |            |           |             |          |          |             |          |             |         |         |         |   |
|             | PAGE2B                          |                   |                      |                    |                              |                                        |         |           |            |           |             |          |          |             |          |             |         |         |         |   |
|             | MTBP;MRPL13                     |                   |                      |                    |                              |                                        |         |           |            |           |             |          |          |             |          |             |         |         |         |   |
|             | NCEH1;NCEH1;NCEH1;NCEH1         |                   |                      |                    |                              |                                        |         |           |            |           |             |          |          |             |          |             |         |         |         |   |
|             | KRT72;KRT72;KRT72               |                   |                      |                    |                              |                                        |         |           |            |           |             |          |          |             |          |             |         |         |         |   |
|             | ACBD4;ACBD4;ACBD4;ACBD4         |                   |                      |                    |                              |                                        |         |           |            |           |             |          |          |             |          |             |         |         |         |   |
|             | IRP2                            |                   |                      |                    |                              |                                        |         |           |            |           |             |          |          |             |          |             |         |         |         |   |
|             | IGF2BP1;IGF2BP1                 |                   |                      |                    |                              |                                        |         |           |            |           |             |          |          |             |          |             |         |         |         |   |
|             | PRR25                           |                   |                      |                    |                              |                                        |         |           |            |           |             |          |          |             |          |             |         |         |         |   |
|             | COL21A1                         |                   |                      |                    |                              |                                        |         |           |            |           |             |          |          |             |          |             |         |         |         |   |
|             | KCTD9                           |                   |                      |                    |                              |                                        |         |           |            |           |             |          |          |             |          |             |         |         |         |   |
|             | MAST3                           |                   |                      |                    |                              |                                        |         |           |            |           |             |          |          |             |          |             |         |         |         |   |
|             | RIPK4                           |                   |                      |                    |                              |                                        |         |           |            |           |             |          |          |             |          |             |         |         |         |   |
| cg00687252  | IER3                            | 0.00503078        | 0.00503078           | 5.50251            | 5.50251                      | T up vs N                              | 10.557  | 27.2342   | 41.2776    | 1         |             |          |          |             |          |             |         |         |         |   |
| cg00689010  | COPA;COPA;NCSTN                 | 1.30E-06          | 1.30E-06             | 0.128677           | -7.77138                     | T down vs N                            | 56.061  | 39.3785   | 11.2389    | 1         |             |          |          |             |          |             |         |         |         |   |
| cg00689340  | RTKN;RTKN;RTKN                  | 3.04E-05          | 3.04E-05             | 6.5495             | 6.5495                       | T up vs N                              | 32.945  | 33.0822   | 16.0668    | 1         |             |          |          |             |          |             |         |         |         |   |
| cg00689651  | NFIX                            | 0.00323813        | 0.00323813           | 3.83904            | 3.83904                      | T up vs N                              | 11.958  | 16.9492   | 22.6782    | 1         |             |          |          |             |          |             |         |         |         |   |
| cg00691240  | TNXC12;KT12                     | 7.31E-05          | 7.31E-05             | 0.185894           | -5.37941                     | T down vs N                            | 27.994  | 26.5163   | 15.1554    | 1         |             |          |          |             |          |             |         |         |         |   |
| cg00691625  | NR5A1                           | 5.70E-08          | 5.70E-08             | 0.305222           | -3.2763                      | T down vs N                            | 89.983  | 13.1903   | 2.34539    | 1         |             |          |          |             |          |             |         |         |         |   |
| cg00695799  | ZC3H12D                         | 8.77E-05          | 8.77E-05             | 0.210986           | -4.73964                     | T down vs N                            | 27.034  | 22.6756   | 13.4203    | 1         |             |          |          |             |          |             |         |         |         |   |
| cg00696930  | LAMC2;LAMC2                     | 0.00016491        | 0.000164907          | 0.253821           | -3.93978                     | T down vs N                            | 23.87   | 17.6082   | 11.8026    | 1         |             |          |          |             |          |             |         |         |         |   |
| cg00697703  | OSBPL3;OSBPL3;OSBPL3;OSBPL3     | 0.00375631        | 0.00375631           | 0.32307            | -3.0953                      | T down vs N                            | 11.477  | 11.9572   | 16.6701    | 1         |             |          |          |             |          |             |         |         |         |   |
| cg00698413  | FAM124B;FAM124B;FAM124B;FAM124B | 0.0056938         | 0.0056938            | 0.28507            | -3.50791                     | T down vs N                            | 10.177  | 14.7524   | 23.1925    | 1         |             |          |          |             |          |             |         |         |         |   |
|             | 4B                              |                   |                      |                    |                              |                                        |         |           |            |           |             |          |          |             |          |             |         |         |         |   |
|             | SULT2B1;SULT2B1                 |                   |                      |                    |                              |                                        |         |           |            |           |             |          |          |             |          |             |         |         |         |   |
|             | USP53                           |                   |                      |                    |                              |                                        |         |           |            |           |             |          |          |             |          |             |         |         |         |   |
|             | SMCHD1                          |                   |                      |                    |                              |                                        |         |           |            |           |             |          |          |             |          |             |         |         |         |   |
|             | WFDCC2                          |                   |                      |                    |                              |                                        |         |           |            |           |             |          |          |             |          |             |         |         |         |   |
|             | NOS3                            |                   |                      |                    |                              |                                        |         |           |            |           |             |          |          |             |          |             |         |         |         |   |
|             | FHAD1                           |                   |                      |                    |                              |                                        |         |           |            |           |             |          |          |             |          |             |         |         |         |   |
|             | MMD                             |                   |                      |                    |                              |                                        |         |           |            |           |             |          |          |             |          |             |         |         |         |   |
|             | MIR375                          |                   |                      |                    |                              |                                        |         |           |            |           |             |          |          |             |          |             |         |         |         |   |
|             | SFRP2                           |                   |                      |                    |                              |                                        |         |           |            |           |             |          |          |             |          |             |         |         |         |   |
|             | OR5A2                           |                   |                      |                    |                              |                                        |         |           |            |           |             |          |          |             |          |             |         |         |         |   |
|             | LECT1;LECT1;LECT1;LECT1         |                   |                      |                    |                              |                                        |         |           |            |           |             |          |          |             |          |             |         |         |         |   |
|             | PROM1;PROM1                     |                   |                      |                    |                              |                                        |         |           |            |           |             |          |          |             |          |             |         |         |         |   |
|             | MACROD1                         |                   |                      |                    |                              |                                        |         |           |            |           |             |          |          |             |          |             |         |         |         |   |
| cg00712857  | TNNC2                           | 0.00078153        | 0.000781529          | 4.16371            | 4.16371                      | T up vs N                              | 17.077  | 19.0567   | 17.8546    | 1         |             |          |          |             |          |             |         |         |         |   |
| cg00713294  | USP24                           | 0.0012746         | 0.0012746            | 0.25489            | -3.92326                     | T down vs N                            | 15.208  | 17.5005   | 18.4124    | 1         |             |          |          |             |          |             |         |         |         |   |
| cg00714377  | SLA2;SLA2                       | 1.83E-05          | 1.83E-05             | 0.23519            | -4.25187                     | T down vs N                            | 36.089  | 19.6207   | 8.69893    | 1         |             |          |          |             |          |             |         |         |         |   |
| cg00714464  | IL1F7;IL1F7;IL1F7;IL1F7         | 3.55E-05          | 3.55E-05             | 0.168569           | -5.93228                     | T down vs N                            | 32.039  | 29.6894   | 14.8266    | 1         |             |          |          |             |          |             |         |         |         |   |
| cg00714888  | CROCC                           | 5.94E-05          | 5.94E-05             | 5.01595            | 5.01595                      | T up vs N                              | 29.123  | 24.3572   | 13.3816    | 1         |             |          |          |             |          |             |         |         |         |   |
| cg00715047  | LLGL2;LLGL2;LLGL2               | 0.00475013        | 0.00475013           | 3.67498            | 3.67498                      | T up vs N                              | 10.735  | 15.8665   | 23.6495    | 1         |             |          |          |             |          |             |         |         |         |   |
| cg00715197  | RAD51L1;RAD51L1;RAD51L1         | 9.19E-07          | 9.19E-07             | 0.170267           | -5.87312                     | T down vs N                            | 59.173  | 29.356    | 7.93765    | 1         |             |          |          |             |          |             |         |         |         |   |
| cg00715811  | OR2W5                           | 8.60E-06          | 8.60E-06             | 0.171891           | -5.81766                     | T down vs N                            | 41.112  | 29.0422   | 11.3027    | 1         |             |          |          |             |          |             |         |         |         |   |
| cg00716660  | CNIH4                           | 0.00011084        | 0.000110839          | 0.273822           | -3.65201                     | T down vs N                            | 25.832  | 15.714    | 9.73293    | 1         |             |          |          |             |          |             |         |         |         |   |
| cg00716716  | IKZF3;IKZF3;IKZF3;IKZF3;IKZF3   | 2.05E-06          | 2.05E-06             | 0.15722            | -6.3605                      | T down vs N                            | 52.115  | 32.0594   | 9.84272    | 1         |             |          |          |             |          |             |         |         |         |   |
|             | DPYSL2                          |                   |                      |                    |                              |                                        |         |           |            |           |             |          |          |             |          |             |         |         |         |   |
|             | MIR424;MGC16121;MIR503          |                   |                      |                    |                              |                                        |         |           |            |           |             |          |          |             |          |             |         |         |         |   |
|             | RASAL3                          |                   |                      |                    |                              |                                        |         |           |            |           |             |          |          |             |          |             |         |         |         |   |
|             | LHX5                            |                   |                      |                    |                              |                                        |         |           |            |           |             |          |          |             |          |             |         |         |         |   |
|             | LCMT1;LCMT1                     |                   |                      |                    |                              |                                        |         |           |            |           |             |          |          |             |          |             |         |         |         |   |
|             | 6.49E-06                        |                   |                      |                    |                              |                                        |         |           |            |           | 6.49E-06    | 0.258286 | -3.87167 | T down vs N | 43.122   | 17.1632     | 6.36829 | 1       |         |   |
|             | cg00721772                      |                   |                      |                    |                              |                                        |         |           |            |           | LCMT1;LCMT1 | 6.49E-06 | 6.49E-06 | 0.258286    | -3.87167 | T down vs N | 43.122  | 17.1632 | 6.36829 | 1 |
|             | cg00721772                      |                   |                      |                    |                              |                                        |         |           |            |           | LCMT1;LCMT1 | 6.49E-06 | 6.49E-06 | 0.258286    | -3.87167 | T down vs N | 43.122  | 17.1632 | 6.36829 | 1 |
|             | cg00721772                      |                   |                      |                    |                              |                                        |         |           |            |           | LCMT1;LCMT1 | 6.49E-06 | 6.49E-06 | 0.258286    | -3.87167 | T down vs N | 43.122  | 17.1632 | 6.36829 | 1 |
|             | cg00721772                      |                   |                      |                    |                              |                                        |         |           |            |           | LCMT1;LCMT1 | 6.49E-06 | 6.49E-06 | 0.258286    | -3.87167 | T down vs N | 43.122  | 17.1632 | 6.36829 | 1 |
|             | cg00721772                      |                   |                      |                    |                              |                                        |         |           |            |           | LCMT1;LCMT1 | 6.49E-06 | 6.49E-06 | 0.258286    | -3.87167 | T down vs N | 43.122  | 17.1632 | 6.36829 | 1 |
|             | cg00721772                      |                   |                      |                    |                              |                                        |         |           |            |           | LCMT1;LCMT1 | 6.49E-06 | 6.49E-06 | 0.258286    | -3.87167 | T down vs N | 43.122  | 17.1632 | 6.36829 | 1 |
|             | cg00721772                      |                   |                      |                    |                              |                                        |         |           |            |           | LCMT1;LCMT1 | 6.49E-06 | 6.49E-06 | 0.258286    | -3.87167 | T down vs N | 43.122  | 17.1632 | 6.36829 | 1 |

| Probeset ID                                                    | UCSC_REFGENE_NAME                | p-value<br>(Type) | p-value (T vs.<br>N) | Ratio (T<br>vs. N) | Fold-<br>Change (T<br>vs. N) | Fold-Change (T vs.<br>N) (Description) | F(Type) | SS (Type) | SS (Error) | F (Error) |
|----------------------------------------------------------------|----------------------------------|-------------------|----------------------|--------------------|------------------------------|----------------------------------------|---------|-----------|------------|-----------|
| cg00722300                                                     | RLN3                             | 7.26E-06          | 7.26E-06             | 0.247288           | -4.04388                     | T down vs N                            | 42.313  | 18.2844   | 6.91392    | 1         |
| cg00725994                                                     | COLEC11;COLEC11                  | 0.00102024        | 0.00102024           | 0.284491           | -3.51505                     | T down vs N                            | 16.044  | 14.8003   | 14.7599    | 1         |
| cg00728046                                                     | PSG2                             | 0.00038993        | 0.00038993           | 0.204892           | -4.88063                     | T down vs N                            | 19.946  | 23.538    | 18.8811    | 1         |
| cg00729133                                                     | ZNF804B;MGC26647                 | 1.82E-05          | 1.82E-05             | 0.299965           | -3.33372                     | T down vs N                            | 36.094  | 13.5793   | 6.01947    | 1         |
| cg00730441                                                     | TBX2                             | 0.00348221        | 0.00348221           | 0.293387           | -3.40847                     | T down vs N                            | 11.721  | 14.0841   | 19.2256    | 1         |
| cg00731062                                                     | C3orf79                          | 2.29E-05          | 2.29E-05             | 0.17968            | -5.56544                     | T down vs N                            | 34.679  | 27.5986   | 12.7333    | 1         |
| cg00731608                                                     | TNFAIP2                          | 0.000138          | 0.000138003          | 6.26264            | 6.26264                      | T up vs N                              | 24.738  | 31.5243   | 20.3895    | 1         |
| cg00732815                                                     | MMP9                             | 0.00039167        | 0.000391669          | 0.28174            | -3.54937                     | T down vs N                            | 19.927  | 15.0299   | 12.0679    | 1         |
| cg00734592                                                     | ZC3HAV1;ZC3HAV1                  | 2.29E-05          | 2.29E-05             | 0.19329            | -5.17357                     | T down vs N                            | 34.659  | 25.3008   | 11.6798    | 1         |
| cg00735329                                                     | MBP;MBP                          | 0.000411          | 0.000410999          | 3.4254             | 3.4254                       | T up vs N                              | 19.72   | 14.1981   | 11.5197    | 1         |
| cg00735923                                                     | CFTR                             | 0.00378046        | 0.00378046           | 8.87195            | 8.87195                      | T up vs N                              | 11.456  | 44.63     | 62.3323    | 1         |
| cg00737979                                                     | LOC340074                        | 9.27E-06          | 9.27E-06             | 0.320416           | -3.12094                     | T down vs N                            | 40.593  | 12.1325   | 4.78208    | 1         |
| cg00739778                                                     | RAP1GAP2;RAP1GAP2                | 0.00417963        | 0.00417963           | 0.293721           | -3.40459                     | T down vs N                            | 11.136  | 14.0579   | 20.198     | 1         |
| cg00741410                                                     | TAS1R1;TAS1R1;TAS1R1;NOL9;TAS1R1 | 0.00073191        | 0.000731911          | 0.277536           | -3.60313                     | T down vs N                            | 17.337  | 15.3888   | 14.202     | 1         |
| cg00741717                                                     | TLR8;LOC349408                   | 6.63E-06          | 6.63E-06             | 0.21126            | -4.73351                     | T down vs N                            | 42.969  | 22.6379   | 8.42959    | 1         |
| cg00744351                                                     | CHRNE;C17orf107                  | 0.0001453         | 0.000145298          | 4.89588            | 4.89588                      | T up vs N                              | 24.485  | 23.6308   | 15.4419    | 1         |
| cg00745520                                                     | SELM                             | 0.00078701        | 0.00078701           | 0.279312           | -3.58022                     | T down vs N                            | 17.05   | 15.236    | 14.298     | 1         |
| cg00750307                                                     | NUTF2;CENPT                      | 0.00075019        | 0.000750187          | 0.260445           | -3.83958                     | T down vs N                            | 17.239  | 16.9528   | 15.7343    | 1         |
| cg00750917                                                     | FAM135B                          | 0.00250301        | 0.00250301           | 0.281765           | -3.54905                     | T down vs N                            | 12.816  | 15.0278   | 18.7612    | 1         |
| cg00751021                                                     | PARD3B;PARD3B;PARD3B             | 5.20E-06          | 5.20E-06             | 0.132813           | -7.52937                     | T down vs N                            | 44.746  | 38.1727   | 13.6496    | 1         |
| cg00751958                                                     | NLRP8                            | 8.30E-05          | 8.30E-05             | 0.1347             | -7.42388                     | T down vs N                            | 27.322  | 37.641    | 22.0427    | 1         |
| cg00754426                                                     | RALGAPB                          | 0.00033769        | 0.000337691          | 0.233783           | -4.27746                     | T down vs N                            | 20.573  | 19.7837   | 15.3865    | 1         |
| cg00754896                                                     | LOC283999                        | 0.00048637        | 0.000486369          | 3.25033            | 3.25033                      | T up vs N                              | 19.006  | 13.014    | 10.9554    | 1         |
| cg00755287                                                     | KRTAP9-3;KRTAP9-9                | 3.96E-07          | 3.96E-07             | 0.116423           | -8.58938                     | T down vs N                            | 67.4    | 43.3163   | 10.2828    | 1         |
| cg00756032                                                     | MYF6                             | 0.0043962         | 0.0043962            | 4.01013            | 4.01013                      | T up vs N                              | 10.977  | 18.0657   | 26.3332    | 1         |
| cg00757033                                                     | WDR51B                           | 5.64E-05          | 5.64E-05             | 0.30264            | -3.30425                     | T down vs N                            | 29.405  | 13.3798   | 7.28037    | 1         |
| cg00757327                                                     | DDN                              | 0.00033253        | 0.000332529          | 3.91525            | 3.91525                      | T up vs N                              | 20.64   | 17.4482   | 13.5255    | 1         |
| PCDHGA4;PCDHGA6;PCDHGA1;PCDHG<br>A5;PCDHGB1;PCDHGB4;PCDHGA3;PC |                                  |                   |                      |                    |                              |                                        |         |           |            |           |
| cg00758915                                                     | DHGA2;PCDHGA8;PCDHGA7;PCDHGB2    | 0.00204276        | 0.00204276           | 3.50104            | 3.50104                      | T up vs N                              | 13.514  | 14.7064   | 17.4117    | 1         |
| cg00760935                                                     | DCHS2;DCHS2                      | 0.00039396        | 0.000393963          | 3.79864            | 3.79864                      | T up vs N                              | 19.902  | 16.6837   | 13.4127    | 1         |
| cg00762069                                                     | COL6A4P2                         | 0.00625304        | 0.00625304           | 0.325032           | -3.07662                     | T down vs N                            | 9.8946  | 11.8294   | 19.1287    | 1         |
| cg00764796                                                     | LOC100134368                     | 0.00055673        | 0.000556732          | 0.225091           | -4.44264                     | T down vs N                            | 18.445  | 20.8287   | 18.0679    | 1         |
| cg00764894                                                     | SF3A3                            | 0.00213024        | 0.00213024           | 0.276825           | -3.61239                     | T down vs N                            | 13.368  | 15.4505   | 18.4919    | 1         |
| cg00765922                                                     | BCAN                             | 0.00227609        | 0.00227609           | 0.317613           | -3.14848                     | T down vs N                            | 13.14   | 12.3205   | 15.0019    | 1         |
| cg00767581                                                     | HOXD4;MIR10B                     | 0.00104162        | 0.00104162           | 5.74102            | 5.74102                      | T up vs N                              | 15.965  | 28.6065   | 28.6695    | 1         |
| cg00768487                                                     | UBXN11;UBXN11;UBXN11             | 0.00186103        | 0.00186103           | 0.176493           | -5.66595                     | T down vs N                            | 13.84   | 28.1772   | 32.574     | 1         |
| cg00770085                                                     | TTC39A                           | 0.0006095         | 0.000609498          | 3.89825            | 3.89825                      | T up vs N                              | 18.074  | 17.3371   | 15.3478    | 1         |
| cg00772774                                                     | GALNT9                           | 0.00275326        | 0.00275326           | 0.318281           | -3.14187                     | T down vs N                            | 12.495  | 12.2754   | 15.7186    | 1         |
| cg00772863                                                     | UBE2MP1                          | 4.29E-05          | 4.29E-05             | 0.23044            | -4.33952                     | T down vs N                            | 30.935  | 20.1778   | 10.4363    | 1         |
| cg00776405                                                     | TG                               | 3.69E-06          | 3.69E-06             | 0.253196           | -3.94952                     | T down vs N                            | 47.355  | 17.6717   | 5.97078    | 1         |
| cg00777121                                                     | RASSF1;RASSF1                    | 6.71E-05          | 6.71E-05             | 4.26778            | 4.26778                      | T up vs N                              | 28.46   | 19.7221   | 11.0878    | 1         |
| cg00778880                                                     | GPATCH2;SPATA17                  | 2.28E-05          | 2.28E-05             | 0.26647            | -3.75277                     | T down vs N                            | 34.7    | 16.3813   | 7.5534     | 1         |
| cg00779313                                                     | WDR37                            | 4.77E-05          | 4.77E-05             | 0.206398           | -4.84501                     | T down vs N                            | 30.338  | 23.321    | 12.2994    | 1         |
| cg00781691                                                     | FAM189A1                         | 0.00037473        | 0.000374725          | 0.247958           | -4.03295                     | T down vs N                            | 20.118  | 18.2137   | 14.4852    | 1         |
| cg00782697                                                     | INPP5A                           | 0.00080263        | 0.000802626          | 0.230903           | -4.33081                     | T down vs N                            | 16.972  | 20.1226   | 18.9698    | 1         |
| cg00783553                                                     | CAMTA1                           | 0.00180128        | 0.00180128           | 10.8055            | 10.8055                      | T up vs N                              | 13.956  | 53.0559   | 60.8285    | 1         |
| cg00784153                                                     | COL5A3                           | 0.00028104        | 0.000281037          | 3.98479            | 3.98479                      | T up vs N                              | 21.389  | 17.9012   | 13.391     | 1         |
| cg00790395                                                     | CYP26C1                          | 0.00403596        | 0.00403596           | 4.81407            | 4.81407                      | T up vs N                              | 11.247  | 23.132    | 32.9074    | 1         |
| cg00790847                                                     | SLC2A13                          | 0.00016632        | 0.000166315          | 0.282961           | -3.53406                     | T down vs N                            | 23.83   | 14.9275   | 10.0229    | 1         |
| cg00790916                                                     | NHP2L1                           | 0.00041081        | 0.000410808          | 0.255234           | -3.91797                     | T down vs N                            | 19.722  | 17.466    | 14.1697    | 1         |
| cg00791868                                                     | C14orf53;C14orf53                | 7.72E-07          | 7.72E-07             | 0.283138           | -3.53184                     | T down vs N                            | 60.804  | 14.9127   | 3.92412    | 1         |
| cg00793648                                                     | DDX24;IFI27L1;IFI27L1            | 0.00163316        | 0.00163316           | 0.323141           | -3.09462                     | T down vs N                            | 14.305  | 11.9526   | 13.3693    | 1         |
| cg00793992                                                     | OR2T3                            | 0.00033863        | 0.000338629          | 0.227546           | -4.39472                     | T down vs N                            | 20.56   | 20.5268   | 15.9739    | 1         |
| cg00795825                                                     | KRTAP17-1                        | 2.73E-05          | 2.73E-05             | 0.25434            | -3.93175                     | T down vs N                            | 33.596  | 17.5558   | 8.36084    | 1         |
| cg00797183                                                     | AFM                              | 0.00150943        | 0.00150943           | 0.239151           | -4.18146                     | T down vs N                            | 14.588  | 19.1705   | 21.0255    | 1         |
| cg00798281                                                     | HLA-DPA1                         | 0.00015384        | 0.000153841          | 0.299254           | -3.34165                     | T down vs N                            | 24.206  | 13.633    | 9.01118    | 1         |
| cg00799539                                                     | ASCL1                            | 0.0001552         | 0.000155202          | 0.255451           | -3.91465                     | T down vs N                            | 24.164  | 17.4442   | 11.5508    | 1         |
| cg00800109                                                     | OR2Z1                            | 0.00107705        | 0.00107705           | 0.228385           | -4.37857                     | T down vs N                            | 15.838  | 20.4249   | 20.6338    | 1         |
| cg00805577                                                     | HIP1R                            | 4.33E-05          | 4.33E-05             | 4.08748            | 4.08748                      | T up vs N                              | 30.891  | 18.5662   | 9.61652    | 1         |
| cg00805880                                                     | PPFIA4                           | 0.00034329        | 0.000343285          | 0.303943           | 0.303943                     | T up vs N                              | 20.5    | 11.5748   | 9.03377    | 1         |
| cg00807366                                                     | MSMB;MSMB                        | 3.54E-05          | 3.54E-05             | 0.230998           | -4.32904                     | T down vs N                            | 32.059  | 20.1114   | 10.0373    | 1         |
| cg00807464                                                     | CUX2                             | 2.50E-05          | 2.50E-05             | 0.230086           | -4.3462                      | T down vs N                            | 34.142  | 20.2201   | 9.47592    | 1         |
| cg00807871                                                     | MDGA1                            | 0.0016781         | 0.0016781            | 6.18051            | 6.18051                      | T up vs N                              | 14.207  | 31.0722   | 34.9928    | 1         |
| PCDHGA4;PCDHGA11;PCDHGA11;PCD<br>HGA9;PCDHGA1;PCDHGB1;PCDHGB8P |                                  |                   |                      |                    |                              |                                        |         |           |            |           |
| cg00808170                                                     | ;PCDHGB6;PCDHGB3;PCDHGB7;PCDH    | 5.84E-05          | 5.84E-05             | 3.40356            | 3.40356                      | T up vs N                              | 29.21   | 14.051    | 7.69658    | 1         |
| cg00809164                                                     | MT1L                             | 3.11E-05          | 3.11E-05             | 5.70486            | 5.70486                      | T up vs N                              | 32.812  | 28.4      | 13.8486    | 1         |
| cg00809820                                                     | TBCD;FN3K                        | 0.00726371        | 0.00726371           | 3.06523            | 3.06523                      | T up vs N                              | 9.4499  | 11.7515   | 19.8969    | 1         |

| Probeset ID | UCSC_REFGENE_NAME           | p-value<br>(Type) | p-value (T vs.<br>N) | Ratio (T<br>vs. N) | Fold-<br>Change (T<br>vs. N) | Fold-Change (T vs.<br>N) (Description) | F(Type) | SS (Type) | SS (Error) | F (Error) |
|-------------|-----------------------------|-------------------|----------------------|--------------------|------------------------------|----------------------------------------|---------|-----------|------------|-----------|
| cg00809988  | ELAVL2;ELAVL2;ELAVL2        | 0.00027054        | 0.000270537          | 4.351              | 4.351                        | T up vs N                              | 21.561  | 20.2505   | 15.0277    | 1         |
| cg00811132  | CLDN5;CLDN5                 | 5.92E-06          | 5.92E-06             | 27.7443            | 27.7443                      | T up vs N                              | 43.788  | 103.426   | 37.7917    | 1         |
| cg00815931  | RPTOR;RPTOR                 | 0.00283894        | 0.00283894           | 0.231066           | -4.32776                     | T down vs N                            | 13.453  | 16.0826   | 15.541     | 1         |
| cg00816515  | SPON1                       | 0.00024318        | 0.000243182          | 3.89256            | 3.89256                      | T up vs N                              | 22.046  | 17.2999   | 12.5556    | 1         |
| cg00816770  | FREM3                       | 1.21E-05          | 1.21E-05             | 5.28481            | 5.28481                      | T up vs N                              | 38.781  | 25.96     | 10.7105    | 1         |
| cg00817885  | SERPINA7                    | 8.44E-06          | 8.44E-06             | 0.154837           | -6.45839                     | T down vs N                            | 41.243  | 32.5909   | 12.6435    | 1         |
| cg00819233  | DDR2;DDR2                   | 0.00666031        | 0.00666031           | 0.331819           | -3.01369                     | T down vs N                            | 9.7062  | 11.3984   | 18.7894    | 1         |
| cg00821400  | TBPL2                       | 2.00E-05          | 2.00E-05             | 0.280444           | -3.56577                     | T down vs N                            | 35.522  | 15.1395   | 6.81927    | 1         |
| cg00825252  | SMYD2                       | 0.00011159        | 0.000111588          | 0.246229           | -4.06126                     | T down vs N                            | 25.798  | 18.3969   | 11.4097    | 1         |
| cg00825690  | CACHD1                      | 3.11E-06          | 3.11E-06             | 0.231217           | -4.32493                     | T down vs N                            | 48.691  | 20.0853   | 6.6001     | 1         |
| cg00825734  | SCNN1D;SCNN1D;SCNN1D        | 9.22E-05          | 9.22E-05             | 0.28074            | -3.56201                     | T down vs N                            | 26.778  | 15.1144   | 9.03111    | 1         |
| cg00827382  | NCKAP5;NCKAP5               | 6.89E-05          | 6.89E-05             | 0.227597           | -4.39374                     | T down vs N                            | 28.314  | 20.5206   | 11.5961    | 1         |
| cg00827581  | RAVER1                      | 0.00112274        | 0.00112274           | 0.328703           | -3.04226                     | T down vs N                            | 15.681  | 11.5942   | 11.8299    | 1         |
| cg00828618  | FCER2                       | 0.0004558         | 0.000455804          | 0.244994           | -4.08174                     | T down vs N                            | 19.28   | 18.5292   | 15.3771    | 1         |
| cg00830283  | PDZK1                       | 0.00042356        | 0.000423555          | 0.17886            | -5.59096                     | T down vs N                            | 19.591  | 27.7459   | 22.6596    | 1         |
| cg00831127  | EPHB2;EPHB2                 | 7.74E-05          | 7.74E-05             | 0.17616            | -5.67666                     | T down vs N                            | 27.696  | 28.2386   | 16.3135    | 1         |
| cg00831237  | AQP2                        | 1.22E-05          | 1.22E-05             | 0.285252           | -3.50567                     | T down vs N                            | 38.741  | 14.7374   | 6.08661    | 1         |
| cg00831247  | LOXL3                       | 2.44E-05          | 2.44E-05             | 0.283158           | -3.5316                      | T down vs N                            | 34.269  | 14.9111   | 6.96194    | 1         |
| cg00831735  | FAM83A;FAM83A;LOC100131726  | 3.13E-05          | 3.13E-05             | 0.269081           | -3.71635                     | T down vs N                            | 32.77   | 16.1406   | 7.88065    | 1         |
| cg00832923  | GIMAP4                      | 0.0002337         | 0.0002337            | 0.150896           | -6.6271                      | T down vs N                            | 22.229  | 33.4982   | 24.1119    | 1         |
| cg00833257  | SIGLEC7;SIGLEC7             | 3.02E-06          | 3.02E-06             | 0.210329           | -4.75446                     | T down vs N                            | 48.946  | 22.7667   | 7.44225    | 1         |
| cg00833777  | ITGAM;ITGAM                 | 0.00111991        | 0.00111991           | 0.275366           | -3.63153                     | T down vs N                            | 15.691  | 15.5779   | 15.885     | 1         |
| cg00834922  | ADAMTS2                     | 5.00E-06          | 5.00E-06             | 0.141599           | -7.06221                     | T down vs N                            | 45.036  | 35.7888   | 12.7146    | 1         |
| cg00834924  | AKAP13;AKAP13               | 0.00028722        | 0.000287219          | 0.270887           | -3.69157                     | T down vs N                            | 21.291  | 15.9765   | 12.0061    | 1         |
| cg00835193  | LINGO3                      | 2.71E-05          | 2.71E-05             | 5.15203            | 5.15203                      | T up vs N                              | 33.644  | 25.1725   | 11.9713    | 1         |
| cg00838532  | ZNF783                      | 0.0016616         | 0.0016616            | 0.293722           | -3.40458                     | T down vs N                            | 14.243  | 14.0579   | 15.7924    | 1         |
| cg00840332  | LEP                         | 3.88E-05          | 3.88E-05             | 20.4663            | 20.4663                      | T up vs N                              | 31.514  | 85.3541   | 43.3359    | 1         |
| cg00842231  | LOC55908;DOCK6              | 0.00449019        | 0.00449019           | 0.332425           | -3.0082                      | T down vs N                            | 10.91   | 11.3607   | 16.6606    | 1         |
| cg00844791  | SBK2                        | 0.00445934        | 0.00445934           | 0.241295           | -4.1443                      | T down vs N                            | 10.932  | 18.9321   | 27.7091    | 1         |
| cg00845598  | FLJ43860                    | 0.00167277        | 0.00167277           | 0.263635           | -3.79312                     | T down vs N                            | 14.219  | 16.6474   | 18.7328    | 1         |
| cg00848374  | KCNK2;KCNK2                 | 2.55E-07          | 2.55E-07             | 0.10304            | -9.70493                     | T down vs N                            | 72.034  | 48.375    | 10.7449    | 1         |
| cg00848509  | ZNF263                      | 0.00025775        | 0.000257751          | 0.185153           | -5.40093                     | T down vs N                            | 21.78   | 26.6422   | 19.5717    | 1         |
| cg00849025  | OR5B3                       | 3.41E-05          | 3.41E-05             | 0.253757           | -3.94077                     | T down vs N                            | 32.275  | 17.6147   | 8.73245    | 1         |
| cg00851261  | PLK5P                       | 8.62E-06          | 8.62E-06             | 0.204692           | -4.88539                     | T down vs N                            | 41.101  | 23.567    | 9.17439    | 1         |
| cg00851312  | ADAM8;ADAM8;ADAM8           | 0.00259073        | 0.00259073           | 0.242659           | -4.12101                     | T down vs N                            | 12.7    | 18.7823   | 23.6635    | 1         |
| cg00852033  | ZNF598                      | 2.15E-05          | 2.15E-05             | 0.277234           | -3.60705                     | T down vs N                            | 35.049  | 15.4149   | 7.03702    | 1         |
| cg00853733  | SETD1B                      | 0.00314935        | 0.00314935           | 0.273332           | -3.65856                     | T down vs N                            | 12.049  | 15.7575   | 20.9241    | 1         |
| cg00853940  | TRPM8                       | 0.00314927        | 0.00314927           | 4.55686            | 4.55686                      | T up vs N                              | 12.049  | 21.5438   | 28.6074    | 1         |
| cg00859129  | GPSM2                       | 1.92E-05          | 1.92E-05             | 0.311719           | -3.20801                     | T down vs N                            | 35.762  | 12.7262   | 5.69378    | 1         |
| cg00859147  | ORZ21                       | 1.74E-06          | 1.74E-06             | 0.205374           | -4.86917                     | T down vs N                            | 53.502  | 23.4683   | 7.01827    | 1         |
| cg00859877  | PTPRN2;PTPRN2;PTPRN2        | 0.00494684        | 0.00494684           | 0.314846           | -3.17616                     | T down vs N                            | 10.609  | 12.5093   | 18.8667    | 1         |
| cg00863007  | LOC402644                   | 1.54E-05          | 1.54E-05             | 0.178706           | -5.59577                     | T down vs N                            | 37.174  | 27.7737   | 11.954     | 1         |
| cg00864012  | TEX2                        | 0.00094986        | 0.000949856          | 0.285182           | -3.50653                     | T down vs N                            | 16.317  | 14.7432   | 14.4564    | 1         |
| cg00864458  | RPS20;RPS20                 | 0.00275656        | 0.00275656           | 0.315693           | -3.16763                     | T down vs N                            | 12.491  | 12.4511   | 15.9487    | 1         |
| cg00864474  | NTN1                        | 5.94E-05          | 5.94E-05             | 7.64579            | 7.64579                      | T up vs N                              | 29.116  | 38.7552   | 21.2972    | 1         |
| cg00866321  | ADAMTS18                    | 1.69E-07          | 1.69E-07             | 0.083222           | -12.016                      | T down vs N                            | 76.631  | 57.896    | 12.0883    | 1         |
| cg00866556  | TMEM200B                    | 0.00030569        | 0.000305687          | 6.39455            | 6.39455                      | T up vs N                              | 21.013  | 32.2447   | 24.5524    | 1         |
| cg00866632  | RPL29                       | 2.86E-06          | 2.86E-06             | 0.222369           | -4.49704                     | T down vs N                            | 49.372  | 21.17     | 6.86053    | 1         |
| cg00866953  | KIAA1026                    | 0.00186598        | 0.00186598           | 0.317841           | -3.14623                     | T down vs N                            | 13.831  | 12.3051   | 14.2349    | 1         |
| cg00868860  | DCD                         | 1.59E-05          | 1.59E-05             | 0.229914           | -4.34945                     | T down vs N                            | 36.997  | 20.2407   | 8.75334    | 1         |
| cg00870242  | C8orf74;C8orf74             | 0.00016031        | 0.00016031           | 0.298992           | -3.34457                     | T down vs N                            | 24.007  | 13.6528   | 9.09928    | 1         |
| cg00870279  | PFDN6;WDR46;WDR46           | 1.95E-05          | 1.95E-05             | 0.204258           | -4.89576                     | T down vs N                            | 35.689  | 23.6301   | 10.5936    | 1         |
| cg00870449  | SLC8A1;SLC8A1;SLC8A1;SLC8A1 | 0.00021225        | 0.000212251          | 0.308998           | -3.23627                     | T down vs N                            | 22.675  | 12.9184   | 9.11571    | 1         |
| cg00871124  | GRID2IP                     | 0.00015316        | 0.000153162          | 0.189672           | -5.27227                     | T down vs N                            | 24.228  | 25.886    | 17.0951    | 1         |
| cg00871501  | ANO7                        | 0.0009623         | 0.0009623            | 0.290375           | -3.44382                     | T down vs N                            | 16.267  | 14.3221   | 14.0867    | 1         |
| cg00871560  | TMEM108;TMEM108             | 3.67E-05          | 3.67E-05             | 0.255688           | -3.91101                     | T down vs N                            | 31.844  | 17.4205   | 8.7528     | 1         |
| cg00874873  | ABCA7                       | 2.22E-06          | 2.22E-06             | 0.214058           | -4.67164                     | T down vs N                            | 51.444  | 22.2564   | 6.9222     | 1         |
| cg00876196  | KIR2DL4;KIR2DL4;KIR2DL4     | 8.90E-06          | 8.90E-06             | 0.248961           | -4.01669                     | T down vs N                            | 40.874  | 18.1083   | 7.08844    | 1         |
| cg00877329  | HPSE2;HPSE2;HPSE2;HPSE2     | 0.00274824        | 0.00274824           | 0.281468           | -3.5528                      | T down vs N                            | 12.501  | 15.0529   | 19.2658    | 1         |
| cg00881487  | MXRA5                       | 1.48E-05          | 1.48E-05             | 0.147775           | -6.76707                     | T down vs N                            | 37.43   | 34.2427   | 14.6377    | 1         |
| cg00883837  | OR2T6                       | 0.00042215        | 0.000422149          | 0.305294           | -3.27553                     | T down vs N                            | 19.606  | 13.1851   | 10.7602    | 1         |
| cg00884805  | GNG12                       | 0.00027439        | 0.000274393          | 0.212669           | -4.70215                     | T down vs N                            | 21.497  | 22.4448   | 16.7056    | 1         |
| cg00888758  | HRNR                        | 0.001003          | 0.001003             | 0.2731             | -3.66166                     | T down vs N                            | 16.109  | 15.7781   | 15.6716    | 1         |
| cg00889287  | DHRS4                       | 6.21E-05          | 6.21E-05             | 0.305005           | -3.27864                     | T down vs N                            | 28.873  | 13.2062   | 7.31816    | 1         |
| cg00891995  | SPRR2C                      | 9.81E-06          | 9.81E-06             | 0.230819           | -4.33241                     | T down vs N                            | 40.204  | 20.1327   | 8.01227    | 1         |
| cg00893471  | HOXD3                       | 3.35E-05          | 3.35E-05             | 8.61283            | 8.61283                      | T up vs N                              | 32.379  | 43.4262   | 21.459     | 1         |
| cg00895997  | SLC13A1                     | 8.25E-05          | 8.25E-05             | 0.288527           | -3.46588                     | T down vs N                            | 27.356  | 14.4704   | 8.46343    | 1         |
| cg00896540  | FABP5                       | 9.66E-05          | 9.66E-05             | 14.8527            | 14.8527                      | T up vs N                              | 26.534  | 68.1875   | 41.117     | 1         |
| cg00897703  | TMEM163                     | 0.00032139        | 0.000321386          | 0.276389           | -3.61809                     | T down vs N                            | 20.791  | 15.4884   | 11.9195    | 1         |
| cg00898480  | ST6GALNAC1                  | 5.65E-07          | 5.65E-07             | 0.177342           | -5.63882                     | T down vs N                            | 63.817  | 28.0214   | 7.02549    | 1         |
| cg00900105  | HSBP1                       | 2.13E-06          | 2.13E-06             | 0.08328            | -12.0077                     | T down vs N                            | 51.775  | 57.8635   | 17.8816    | 1         |
| cg00902153  | LPP;LPP;LPP                 | 8.90E-06          | 8.90E-06             | 0.165461           | -6.0437                      | T down vs N                            | 40.874  | 30.3132   | 11.866     | 1         |

| Probeset ID                                                                             | UCSC_REFGENE_NAME          | p-value<br>(Type) | p-value (T vs.<br>N) | Ratio (T<br>vs. N) | Fold-<br>Change (T<br>vs. N) | Fold-Change (T vs.<br>N) (Description) | F(Type) | SS (Type) | SS (Error) | F (Error) |
|-----------------------------------------------------------------------------------------|----------------------------|-------------------|----------------------|--------------------|------------------------------|----------------------------------------|---------|-----------|------------|-----------|
| cg00902396                                                                              | CCNT2;CCNT2                | 0.0007984         | 0.000798399          | 0.273962           | -3.65014                     | T down vs N                            | 16.993  | 15.7016   | 14.784     | 1         |
| cg00902763                                                                              | HTR3D;HTR3D;HTR3D          | 8.97E-07          | 8.97E-07             | 0.233274           | -4.28681                     | T down vs N                            | 59.398  | 19.8432   | 5.34512    | 1         |
| cg00907008                                                                              | CHL1                       | 0.00023422        | 0.000234221          | 4.03177            | 4.03177                      | T up vs N                              | 22.218  | 18.206    | 13.1107    | 1         |
| cg00907842                                                                              | FYB;FYB                    | 8.13E-06          | 8.13E-06             | 0.180794           | -5.53116                     | T down vs N                            | 41.512  | 27.4003   | 10.5609    | 1         |
| cg00908027                                                                              | USP10                      | 0.00059397        | 0.000593969          | 0.200266           | -4.99336                     | T down vs N                            | 18.755  | 22.7963   | 18.232     | 1         |
| cg00908117                                                                              | LTBP1                      | 0.00029333        | 0.000293332          | 0.32158            | -3.10964                     | T down vs N                            | 21.197  | 12.0553   | 9.09963    | 1         |
| cg00908758                                                                              | RPF1                       | 7.29E-05          | 7.29E-05             | 0.226822           | -4.40874                     | T down vs N                            | 28.012  | 20.6153   | 11.7753    | 1         |
| cg00910338                                                                              | SNORD114-6                 | 0.00264287        | 0.00264287           | 0.323048           | -3.09551                     | T down vs N                            | 12.632  | 11.9587   | 15.1466    | 1         |
| PCDHGA4;PCDHGA6;PCDHGA1;PCDHGA5;PCDHGB1;PCDHGA3;PCDHGA2;PCDHGA7;PCDHGB2;PCDHGB4;PCDHGB4 |                            |                   |                      |                    |                              |                                        |         |           |            |           |
| cg00911351                                                                              |                            | 0.00029206        | 0.000292057          | 5.04095            | 5.04095                      | T up vs N                              | 21.216  | 24.5076   | 18.482     | 1         |
| cg00911446                                                                              | CAMTA1                     | 3.67E-05          | 3.67E-05             | 0.228691           | -4.37272                     | T down vs N                            | 31.841  | 20.3879   | 10.2448    | 1         |
| cg00911881                                                                              | GATA4                      | 4.52E-06          | 4.52E-06             | 0.233436           | -4.28383                     | T down vs N                            | 45.799  | 19.8242   | 6.92561    | 1         |
| cg00912149                                                                              | AANAT;AANAT;UBE2O          | 7.78E-06          | 7.78E-06             | 0.325335           | -3.07375                     | T down vs N                            | 41.823  | 11.8098   | 4.51802    | 1         |
| cg00914726                                                                              | C1orf87;C1orf87            | 2.96E-05          | 2.96E-05             | 7.21653            | 7.21653                      | T up vs N                              | 33.102  | 36.5847   | 17.6833    | 1         |
| cg00915092                                                                              | HLA2                       | 5.96E-05          | 5.96E-05             | 0.270947           | -3.69076                     | T down vs N                            | 29.103  | 15.9712   | 8.78052    | 1         |
| cg00916255                                                                              | PRRX1;PRRX1                | 0.0007665         | 0.000766503          | 0.230092           | -4.34609                     | T down vs N                            | 17.154  | 20.2194   | 18.8593    | 1         |
| cg00920395                                                                              | OR6K3                      | 3.28E-07          | 3.28E-07             | 0.216325           | -4.62267                     | T down vs N                            | 69.341  | 21.9531   | 5.06556    | 1         |
| cg00920938                                                                              | BMP1;BMP1;BMP1             | 6.66E-05          | 6.66E-05             | 0.296              | -3.37837                     | T down vs N                            | 28.493  | 13.8811   | 7.79477    | 1         |
| cg00921266                                                                              | HOXA3;HOXA3;HOXA3          | 0.00493449        | 0.00493449           | 3.73431            | 3.73431                      | T up vs N                              | 10.616  | 16.2594   | 24.5049    | 1         |
| cg00921682                                                                              | CEACAM21;CEACAM21          | 9.34E-06          | 9.34E-06             | 0.295534           | -3.3837                      | T down vs N                            | 40.542  | 13.9171   | 5.49243    | 1         |
| cg00922200                                                                              | SEMA3A                     | 0.00447693        | 0.00447693           | 0.300119           | -3.33202                     | T down vs N                            | 10.92   | 13.5678   | 19.8804    | 1         |
| cg00924004                                                                              | LOC401463                  | 0.00020536        | 0.00020536           | 0.287497           | -3.4783                      | T down vs N                            | 22.829  | 14.5538   | 10.2003    | 1         |
| cg00925953                                                                              | TAS1R2                     | 0.00024664        | 0.00024664           | 0.199727           | -5.00683                     | T down vs N                            | 21.981  | 24.3023   | 17.6895    | 1         |
| cg00926400                                                                              | BOLL;BOLL                  | 0.00055919        | 0.000559187          | 6.21463            | 6.21463                      | T up vs N                              | 18.427  | 31.2604   | 27.1436    | 1         |
| cg00927594                                                                              | LRRK1                      | 0.00400749        | 0.00400749           | 4.66438            | 4.66438                      | T up vs N                              | 11.27   | 22.2115   | 31.5347    | 1         |
| cg00928751                                                                              | KCNJ2                      | 0.00527891        | 0.00527891           | 3.09065            | 3.09065                      | T up vs N                              | 10.408  | 11.9254   | 18.3322    | 1         |
| cg00933443                                                                              | DBR1                       | 0.00158258        | 0.00158258           | 0.30782            | -3.24866                     | T down vs N                            | 14.418  | 13.0026   | 14.4298    | 1         |
| cg00935717                                                                              | ZMAT4;ZMAT4                | 0.00019898        | 0.000198979          | 0.177685           | -5.62794                     | T down vs N                            | 22.977  | 27.9589   | 19.4692    | 1         |
| cg00935819                                                                              | HORMAD1                    | 9.32E-05          | 9.32E-05             | 0.304804           | -3.2808                      | T down vs N                            | 26.718  | 13.2208   | 7.91729    | 1         |
| cg00936626                                                                              | PIGZ                       | 4.54E-06          | 4.54E-06             | 4.05689            | 4.05689                      | T up vs N                              | 45.763  | 18.3686   | 6.42221    | 1         |
| cg00937742                                                                              | LYPD1;LYPD1                | 6.22E-07          | 6.22E-07             | 0.169337           | -5.90537                     | T down vs N                            | 62.877  | 29.538    | 7.51633    | 1         |
| cg00938540                                                                              | C20orf166                  | 0.00376913        | 0.00376913           | 0.324673           | -3.08003                     | T down vs N                            | 11.466  | 11.8527   | 16.5402    | 1         |
| cg00938547                                                                              | DEFB133                    | 2.55E-06          | 2.55E-06             | 0.153909           | -6.49734                     | T down vs N                            | 50.31   | 32.8013   | 10.4318    | 1         |
| cg00938877                                                                              | OR2L2;OR2L13               | 5.62E-06          | 5.62E-06             | 0.245716           | -4.06975                     | T down vs N                            | 44.165  | 18.4517   | 6.68471    | 1         |
| cg00940560                                                                              | MBOAT4                     | 6.74E-05          | 6.74E-05             | 0.227632           | -4.39306                     | T down vs N                            | 29.673  | 19.3095   | 9.761      | 1         |
| cg00941396                                                                              | KRT34                      | 2.02E-06          | 2.02E-06             | 0.179419           | -5.57355                     | T down vs N                            | 52.212  | 27.6455   | 8.4717     | 1         |
| cg00942551                                                                              | GIPC3                      | 6.52E-06          | 6.52E-06             | 0.207012           | -4.83065                     | T down vs N                            | 43.087  | 23.2334   | 8.62743    | 1         |
| cg00943312                                                                              | TRIM47                     | 2.81E-06          | 2.81E-06             | 0.329138           | -3.03824                     | T down vs N                            | 49.503  | 11.5666   | 3.73848    | 1         |
| cg00944227                                                                              | FAM83A;FAM83A;LOC100131726 | 2.83E-05          | 2.83E-05             | 0.247007           | -4.04847                     | T down vs N                            | 33.387  | 18.3141   | 8.77675    | 1         |
| cg00944421                                                                              | ESRP2                      | 6.17E-07          | 6.17E-07             | 17.004             | 17.004                       | T up vs N                              | 62.953  | 75.1954   | 19.1117    | 1         |
| cg00945108                                                                              | C1orf158                   | 5.49E-05          | 5.49E-05             | 0.32992            | -3.03104                     | T down vs N                            | 29.552  | 11.5173   | 6.23572    | 1         |
| cg00945234                                                                              | DMRTA2                     | 0.00062502        | 0.000625016          | 0.300277           | -3.33026                     | T down vs N                            | 17.972  | 13.5559   | 12.0688    | 1         |
| cg00945507                                                                              | SEC61G;SEC61G              | 0.00023001        | 0.00023001           | 0.291026           | -3.43612                     | T down vs N                            | 22.302  | 14.2703   | 10.2379    | 1         |
| cg00946316                                                                              | PTPRN2;PTPRN2;PTPRN2       | 0.00028365        | 0.000283651          | 0.306264           | -3.26516                     | T down vs N                            | 21.347  | 13.1147   | 9.82953    | 1         |
| cg00947782                                                                              | RNF39;RNF39                | 0.00063764        | 0.000637642          | 6.6935             | 6.6935                       | T up vs N                              | 17.891  | 33.8523   | 30.2751    | 1         |
| cg00950004                                                                              | TPM3                       | 6.51E-07          | 6.51E-07             | 0.236059           | -4.23623                     | T down vs N                            | 62.435  | 19.5209   | 5.00259    | 1         |
| cg00950718                                                                              | CCDC19                     | 1.39E-06          | 1.39E-06             | 0.211392           | -4.73055                     | T down vs N                            | 55.433  | 22.6197   | 6.52895    | 1         |
| cg00952134                                                                              | PPP1R15B                   | 0.00402099        | 0.00402099           | 3.19136            | 3.19136                      | T up vs N                              | 11.508  | 11.8709   | 15.4736    | 1         |
| cg00953399                                                                              | FAM26D;BET3L               | 1.38E-05          | 1.38E-05             | 0.292284           | -3.42134                     | T down vs N                            | 37.888  | 14.1708   | 5.98435    | 1         |
| cg00954105                                                                              | CCDC46;CCDC46              | 5.84E-05          | 5.84E-05             | 0.312021           | -3.20491                     | T down vs N                            | 29.216  | 12.7051   | 6.95786    | 1         |
| cg00955544                                                                              | KRTAP13-1                  | 0.00031999        | 0.000319991          | 0.322438           | -3.10137                     | T down vs N                            | 20.81   | 11.9987   | 9.22539    | 1         |
| cg00955780                                                                              | SLC2A14                    | 0.00019395        | 0.000193948          | 3.42804            | 3.42804                      | T up vs N                              | 23.097  | 14.2159   | 9.8476     | 1         |
| cg00957698                                                                              | C4orf31                    | 2.82E-05          | 2.82E-05             | 0.123953           | -8.06756                     | T down vs N                            | 33.398  | 40.8282   | 19.5598    | 1         |
| cg00959298                                                                              | C17orf54                   | 0.00065996        | 0.000659955          | 0.219682           | -4.55203                     | T down vs N                            | 17.752  | 21.5137   | 19.391     | 1         |
| cg00959749                                                                              | TMEM48;TMEM48;TMEM48       | 8.00E-05          | 8.00E-05             | 0.326531           | -3.0625                      | T down vs N                            | 27.517  | 11.7328   | 6.82211    | 1         |
| cg00960857                                                                              | JAKMIP3                    | 0.00069649        | 0.000696486          | 0.150264           | -6.65497                     | T down vs N                            | 17.535  | 33.647    | 30.7015    | 1         |
| cg00961418                                                                              | STK33                      | 0.00703706        | 0.00703706           | 0.320112           | -3.12391                     | T down vs N                            | 9.5432  | 12.1527   | 20.375     | 1         |
| cg00962147                                                                              | A2BP1;A2BP1;A2BP1          | 0.00072928        | 0.000729283          | 0.304727           | -3.28163                     | T down vs N                            | 17.883  | 12.4484   | 10.4418    | 1         |
| cg00963305                                                                              | MMP15;MMP15                | 0.00458389        | 0.00458389           | 0.328691           | -3.04237                     | T down vs N                            | 12.079  | 9.01828   | 8.95901    | 1         |
| cg00964751                                                                              | C17orf96;C17orf96          | 3.76E-06          | 3.76E-06             | 0.274167           | -3.64741                     | T down vs N                            | 47.209  | 15.6835   | 5.31544    | 1         |
| cg00965110                                                                              | PARN;PARN                  | 0.00048693        | 0.00048693           | 0.24768            | -4.03746                     | T down vs N                            | 19.002  | 18.2429   | 15.3611    | 1         |
| cg00967201                                                                              | RELL1;RELL1                | 0.0016418         | 0.0016418            | 0.285867           | -3.49813                     | T down vs N                            | 14.286  | 14.6869   | 16.4494    | 1         |
| cg00967316                                                                              | PPP1R3A                    | 0.00045901        | 0.000459008          | 0.254484           | -3.92952                     | T down vs N                            | 19.25   | 17.5413   | 14.5797    | 1         |
| CCNL2;CCNL2;CCNL2;CCNL2;LOC148413                                                       |                            |                   |                      |                    |                              |                                        |         |           |            |           |
| cg00968800                                                                              |                            | 8.73E-05          | 8.73E-05             | 0.151415           | -6.60438                     | T down vs N                            | 27.061  | 33.3767   | 19.7341    | 1         |
| cg00969323                                                                              | DTYMK;DTYMK;DTYMK          | 3.45E-05          | 3.45E-05             | 0.175361           | -5.70252                     | T down vs N                            | 32.205  | 28.3866   | 14.103     | 1         |
| cg00969405                                                                              | HOXA5                      | 0.00153466        | 0.00153466           | 3.64534            | 3.64534                      | T up vs N                              | 14.528  | 15.6697   | 17.2569    | 1         |
| cg00973286                                                                              | TNFRSF1A;TNFRSF1A          | 0.00018653        | 0.000186529          | 0.327991           | -3.04887                     | T down vs N                            | 23.282  | 11.6394   | 7.99899    | 1         |
| cg00974204                                                                              | UACA                       | 8.92E-05          | 8.92E-05             | 0.293045           | -3.41245                     | T down vs N                            | 26.947  | 14.1109   | 8.37844    | 1         |
| cg00974761                                                                              | SLFN12L                    | 0.00168051        | 0.00168051           | 0.197081           | -5.07406                     | T down vs N                            | 14.202  | 24.7064   | 27.8337    | 1         |

| Probeset ID | UCSC_REFGENE_NAME                                                              | p-value<br>(Type) | p-value (T vs.<br>N) | Ratio (T<br>vs. N) | Fold-<br>Change (T<br>vs. N) | Fold-Change (T vs.<br>N) (Description) | F(Type) | SS (Type) | SS (Error) | F (Error) |
|-------------|--------------------------------------------------------------------------------|-------------------|----------------------|--------------------|------------------------------|----------------------------------------|---------|-----------|------------|-----------|
| cg00976453  | KCNB1                                                                          | 0.00478364        | 0.00478364           | 12.7644            | 12.7644                      | T up vs N                              | 10.713  | 60.744    | 90.7254    | 1         |
| cg00976619  | CCNL1                                                                          | 0.00012284        | 0.000122839          | 0.316505           | -3.15951                     | T down vs N                            | 25.315  | 12.3957   | 7.83449    | 1         |
| cg00976949  | EEFSEC                                                                         | 1.32E-05          | 1.32E-05             | 0.323717           | -3.08912                     | T down vs N                            | 38.18   | 11.915    | 4.99312    | 1         |
| cg00977403  | IFT140;TMEM204                                                                 | 0.00118081        | 0.00118081           | 0.239273           | -4.17932                     | T down vs N                            | 15.492  | 19.1568   | 19.785     | 1         |
| cg00977707  | ATG7;ATG7;ATG7                                                                 | 3.93E-05          | 3.93E-05             | 0.260114           | -3.84447                     | T down vs N                            | 31.441  | 16.9849   | 8.64341    | 1         |
| cg00978570  | ZBTB17                                                                         | 5.23E-05          | 5.23E-05             | 0.237775           | -4.20565                     | T down vs N                            | 29.826  | 19.3254   | 10.3669    | 1         |
| cg00978584  | CASP8;CASP8;CASP8;CASP8;CASP8;CA<br>SP8                                        | 0.00059238        | 0.000592379          | 0.254937           | -3.92253                     | T down vs N                            | 18.19   | 17.4957   | 15.3893    | 1         |
| cg00978822  | MIR449B;MIR449A;CDC20B;CDC20B;C<br>DC20B                                       | 5.40E-06          | 5.40E-06             | 0.140314           | -7.12688                     | T down vs N                            | 44.461  | 36.1234   | 12.9997    | 1         |
| cg00980698  | RNASE6                                                                         | 0.00054826        | 0.000548258          | 0.246799           | -4.05189                     | T down vs N                            | 18.508  | 18.3362   | 15.8515    | 1         |
| cg00980978  | WFDCC2                                                                         | 7.56E-06          | 7.56E-06             | 13.9187            | 13.9187                      | T up vs N                              | 42.021  | 64.944    | 24.7284    | 1         |
| cg00981443  | LCE4A                                                                          | 7.88E-07          | 7.88E-07             | 0.151785           | -6.58829                     | T down vs N                            | 60.603  | 33.2904   | 8.78911    | 1         |
| cg00981928  | DKFZp434L192                                                                   | 3.50E-05          | 3.50E-05             | 0.266656           | -3.75015                     | T down vs N                            | 32.115  | 16.364    | 8.15262    | 1         |
| cg00982958  | TRIM72                                                                         | 4.13E-05          | 4.13E-05             | 0.13177            | -7.58895                     | T down vs N                            | 31.154  | 38.4714   | 19.7581    | 1         |
| cg00983520  | CPT1B;CPT1B;CPT1B;CPT1B;CHKB-<br>CPT1B;CPT1B;CPT1B;CPT1B;CP<br>T1B;CPT1B;CPT1B | 0.00017461        | 0.000174608          | 4.03214            | 4.03214                      | T up vs N                              | 23.596  | 18.2084   | 12.3467    | 1         |
| cg00988175  | OR10V1                                                                         | 7.85E-06          | 7.85E-06             | 0.132002           | -7.57565                     | T down vs N                            | 41.76   | 38.4048   | 14.7144    | 1         |
| cg00988179  | HMGCLL1;HMGCLL1                                                                | 0.00103919        | 0.00103919           | 0.278516           | -3.59046                     | T down vs N                            | 15.974  | 15.3043   | 15.3295    | 1         |
| cg00989853  | IRF6;IRF6                                                                      | 0.00027984        | 0.000279841          | 169.013            | 169.013                      | T up vs N                              | 23.09   | 215.675   | 130.772    | 1         |
| cg00990350  | MIR609;C10orf79                                                                | 1.97E-05          | 1.97E-05             | 0.332566           | -3.00692                     | T down vs N                            | 35.617  | 11.352    | 5.09957    | 1         |
| cg00990613  | TNFRSF10A                                                                      | 7.74E-05          | 7.74E-05             | 3.92408            | 3.92408                      | T up vs N                              | 27.69   | 17.5058   | 10.1152    | 1         |
| cg00992687  | ESM1;ESM1                                                                      | 3.70E-05          | 3.70E-05             | 0.283472           | -3.52769                     | T down vs N                            | 31.791  | 14.8849   | 7.49133    | 1         |
| cg00994643  | TNFRSF10A                                                                      | 0.00030642        | 0.000306422          | 4.23578            | 4.23578                      | T up vs N                              | 21.002  | 19.518    | 14.8693    | 1         |
| cg00995065  | SLCO1B1                                                                        | 2.88E-05          | 2.88E-05             | 0.165535           | -6.04102                     | T down vs N                            | 33.264  | 30.2983   | 14.5735    | 1         |
| cg00995854  | CD5L                                                                           | 7.15E-05          | 7.15E-05             | 0.257579           | -3.8823                      | T down vs N                            | 28.112  | 17.2328   | 9.80816    | 1         |
| cg00995986  | MEIS1                                                                          | 0.00575727        | 0.00575727           | 0.193513           | -5.1676                      | T down vs N                            | 10.144  | 25.2653   | 39.8517    | 1         |
| cg00997338  | TRIM71                                                                         | 8.29E-06          | 8.29E-06             | 0.25555            | -3.91312                     | T down vs N                            | 41.374  | 17.4343   | 6.74205    | 1         |
| cg00997655  | ALDH7A1                                                                        | 0.00126796        | 0.00126796           | 0.278911           | -3.58537                     | T down vs N                            | 15.227  | 15.2704   | 16.0456    | 1         |
| cg00998135  | KCTD15;KCTD15;KCTD15                                                           | 0.00143734        | 0.00143734           | 0.318164           | -3.14303                     | T down vs N                            | 14.766  | 12.2833   | 13.3097    | 1         |
| cg00998782  | LCE6A;LCE6A                                                                    | 0.00143677        | 0.00143677           | 0.211596           | -4.72599                     | T down vs N                            | 14.768  | 22.5916   | 24.4769    | 1         |
| cg00999858  | MAN1C1                                                                         | 6.62E-07          | 6.62E-07             | 0.259809           | -3.84898                     | T down vs N                            | 62.265  | 17.0145   | 4.37217    | 1         |
| cg01000812  | LOC100288797                                                                   | 9.17E-05          | 9.17E-05             | 0.3194             | -3.13087                     | T down vs N                            | 26.804  | 12.2003   | 7.28257    | 1         |
| cg01001101  | C7orf16;C7orf16                                                                | 3.59E-05          | 3.59E-05             | 0.281144           | -3.55689                     | T down vs N                            | 31.976  | 15.0802   | 7.54582    | 1         |
| cg01002622  | CTPS                                                                           | 0.00011606        | 0.000116057          | 5.48267            | 5.48267                      | T up vs N                              | 25.6    | 27.1189   | 16.9493    | 1         |
| cg01003390  | OR51D1                                                                         | 5.88E-05          | 5.88E-05             | 0.25218            | -3.96543                     | T down vs N                            | 29.177  | 17.7753   | 9.74772    | 1         |
| cg01003724  | RAB1F                                                                          | 6.90E-05          | 6.90E-05             | 0.22026            | -4.54009                     | T down vs N                            | 28.304  | 21.4392   | 12.1194    | 1         |
| cg01003815  | INSL6                                                                          | 0.00033357        | 0.000333566          | 0.239983           | -4.16696                     | T down vs N                            | 20.627  | 19.0776   | 14.7985    | 1         |
| cg01005303  | KIAA2013                                                                       | 0.00094393        | 0.000943933          | 0.275848           | -3.62518                     | T down vs N                            | 16.342  | 15.5356   | 15.211     | 1         |
| cg01008164  | OR52R1                                                                         | 0.00104332        | 0.00104332           | 0.240232           | -4.16265                     | T down vs N                            | 15.959  | 19.0499   | 19.0993    | 1         |
| cg01009664  | TRH;TRH                                                                        | 1.82E-05          | 1.82E-05             | 11.2227            | 11.2227                      | T up vs N                              | 36.111  | 54.7585   | 24.2626    | 1         |
| cg01010328  | TTC24                                                                          | 5.72E-06          | 5.72E-06             | 0.125745           | -7.9526                      | T down vs N                            | 44.045  | 40.2688   | 14.6282    | 1         |
| cg01011757  | TIGD1;EIF4E2                                                                   | 0.00427042        | 0.00427042           | 0.25464            | -3.92711                     | T down vs N                            | 11.068  | 17.5256   | 25.3348    | 1         |
| cg01014615  | HOXD3                                                                          | 0.00023226        | 0.000232262          | 10.4303            | 10.4303                      | T up vs N                              | 22.257  | 51.4923   | 37.0166    | 1         |
| cg01015062  | MRPL39;MRPL39                                                                  | 0.00066098        | 0.000660978          | 0.218488           | -4.57691                     | T down vs N                            | 17.745  | 21.6687   | 19.5376    | 1         |
| cg01015354  | FAM27L                                                                         | 8.11E-06          | 8.11E-06             | 0.329413           | -3.0357                      | T down vs N                            | 41.529  | 11.5492   | 4.44957    | 1         |
| cg01016847  | MRPL52;MRPL52;MRPL52;MRPL52;M<br>RPL52;MRPL52                                  | 1.54E-05          | 1.54E-05             | 0.261362           | -3.82611                     | T down vs N                            | 37.193  | 16.8643   | 7.25489    | 1         |
| cg01019875  | SLC16A11                                                                       | 0.00019831        | 0.000198305          | 15.8543            | 15.8543                      | T up vs N                              | 22.993  | 71.5255   | 49.7724    | 1         |
| cg01019985  | OR2G2                                                                          | 0.00294057        | 0.00294057           | 0.304718           | -3.28172                     | T down vs N                            | 12.276  | 13.2271   | 17.2399    | 1         |
| cg01022219  | C18orf1;C18orf1;C18orf1;C18orf1;C18<br>orf1;C18orf1                            | 2.67E-05          | 2.67E-05             | 4.03076            | 4.03076                      | T up vs N                              | 33.723  | 18.1995   | 8.6347     | 1         |
| cg01022250  | TM4SF5                                                                         | 0.000342          | 0.000341999          | 0.273474           | -3.65666                     | T down vs N                            | 20.517  | 15.7449   | 12.2786    | 1         |
| cg01023593  | ZNF324B                                                                        | 0.00017594        | 0.000175939          | 0.319883           | -3.12615                     | T down vs N                            | 23.56   | 12.168    | 8.26354    | 1         |
| cg01024175  | OR2T29                                                                         | 0.0052176         | 0.0052176            | 0.310069           | -3.22509                     | T down vs N                            | 10.444  | 12.8424   | 19.674     | 1         |
| cg01024618  | ZNF474                                                                         | 0.00429577        | 0.00429577           | 0.284101           | -3.51988                     | T down vs N                            | 11.05   | 14.8326   | 21.4781    | 1         |
| cg01025883  | PRKCB;PRKCB                                                                    | 0.00069094        | 0.000690942          | 0.332332           | -3.00904                     | T down vs N                            | 17.567  | 11.3665   | 10.3526    | 1         |
| cg01025894  | HCG18;HCG18                                                                    | 0.00152858        | 0.00152858           | 0.289958           | -3.44878                     | T down vs N                            | 14.543  | 14.3555   | 15.7939    | 1         |
| cg01026009  | CNPY1                                                                          | 0.00022227        | 0.00022227           | 0.225804           | -4.42861                     | T down vs N                            | 22.46   | 20.7404   | 14.7749    | 1         |
| cg01026256  | VWA5B2;MIR1224                                                                 | 0.00013353        | 0.00013353           | 3.11363            | 3.11363                      | T up vs N                              | 24.9    | 12.0825   | 7.76376    | 1         |
| cg01028364  | RAB27A;RAB27A;RAB27A;RAB27A                                                    | 8.83E-05          | 8.83E-05             | 0.181287           | -5.51612                     | T down vs N                            | 26.999  | 27.3132   | 16.1862    | 1         |
| cg01029926  | NAT2                                                                           | 0.00011639        | 0.000116385          | 0.323104           | -3.09498                     | T down vs N                            | 25.586  | 11.955    | 7.47603    | 1         |
| cg01031400  | TNFRSF10D;TNFRSF10D                                                            | 3.22E-05          | 3.22E-05             | 4.44385            | 4.44385                      | T up vs N                              | 32.616  | 20.8363   | 10.2214    | 1         |
| cg01031670  | CYB5R3;CYB5R3;CYB5R3                                                           | 0.00031411        | 0.00031411           | 0.253692           | -3.94178                     | T down vs N                            | 20.892  | 17.6213   | 13.4951    | 1         |
| cg01031897  | JAKMIP3                                                                        | 0.00176282        | 0.00176282           | 3.23472            | 3.23472                      | T up vs N                              | 14.032  | 12.9079   | 14.7182    | 1         |
| cg01031999  | STK19;STK19;DOM3Z;STK19                                                        | 3.43E-06          | 3.43E-06             | 0.262174           | -3.81426                     | T down vs N                            | 47.937  | 16.7864   | 5.60284    | 1         |
| cg01041239  | C18orf1;C18orf1                                                                | 0.00090483        | 0.000904826          | 0.236219           | -4.23335                     | T down vs N                            | 16.505  | 19.5025   | 18.906     | 1         |
| cg01042100  | RBP3                                                                           | 8.00E-06          | 8.00E-06             | 0.270583           | -3.69572                     | T down vs N                            | 41.623  | 16.0041   | 6.15208    | 1         |
| cg01042424  | GPX5;GPX5                                                                      | 0.0006805         | 0.000680496          | 0.259447           | -3.85436                     | T down vs N                            | 17.628  | 17.0497   | 15.475     | 1         |
| cg01044293  | ITGA6;ITGA6                                                                    | 1.45E-05          | 1.45E-05             | 0.156664           | -6.38308                     | T down vs N                            | 37.56   | 32.1823   | 13.7092    | 1         |
| cg01044637  | IQSEC1                                                                         | 6.19E-06          | 6.19E-06             | 0.255995           | -3.90633                     | T down vs N                            | 43.46   | 17.3899   | 6.40213    | 1         |

| Probeset ID                                           | UCSC_REFGENE_NAME             | p-value<br>(Type) | p-value (T vs.<br>N) | Ratio (T<br>vs. N) | Fold-<br>Change (T<br>vs. N) | Fold-Change (T vs.<br>N) (Description) | F(Type) | SS (Type) | SS (Error) | F (Error) |
|-------------------------------------------------------|-------------------------------|-------------------|----------------------|--------------------|------------------------------|----------------------------------------|---------|-----------|------------|-----------|
| cg01044684                                            | ADAMTS13;REXO4                | 0.00022591        | 0.000225909          | 0.198676           | -5.03331                     | T down vs N                            | 22.385  | 24.4617   | 17.4844    | 1         |
| cg01046833                                            | OR4C46                        | 1.91E-05          | 1.91E-05             | 0.298709           | -3.34774                     | T down vs N                            | 35.814  | 13.6742   | 6.10894    | 1         |
| cg01047748                                            | FFAR3                         | 0.00060426        | 0.000604255          | 0.158887           | -6.29377                     | T down vs N                            | 18.109  | 31.6949   | 28.0036    | 1         |
| cg01049205                                            | LRIT1                         | 5.56E-05          | 5.56E-05             | 3.9605             | 3.9605                       | T up vs N                              | 29.481  | 17.7432   | 9.6295     | 1         |
| cg01049782                                            | CRHR2                         | 0.00066272        | 0.000662717          | 0.221136           | -4.5221                      | T down vs N                            | 17.735  | 21.3269   | 19.2408    | 1         |
| cg01053349                                            | TGIF2LY                       | 1.34E-05          | 1.34E-05             | 0.186308           | -5.36745                     | T down vs N                            | 38.094  | 26.4462   | 11.1079    | 1         |
| cg01053621                                            | APOA2                         | 1.01E-05          | 1.01E-05             | 0.315557           | -3.169                       | T down vs N                            | 40.028  | 12.4605   | 4.98076    | 1         |
| cg01054282                                            | KIAA0020                      | 3.52E-05          | 3.52E-05             | 0.286655           | -3.48852                     | T down vs N                            | 32.077  | 14.6224   | 7.29358    | 1         |
| cg01054755                                            | LOC389333                     | 2.51E-06          | 2.51E-06             | 24.7544            | 24.7544                      | T up vs N                              | 50.43   | 96.4499   | 30.6007    | 1         |
| cg01055462                                            | PYROXD1                       | 2.48E-06          | 2.48E-06             | 0.108993           | -9.17494                     | T down vs N                            | 50.532  | 46.0137   | 14.5693    | 1         |
| cg01058717                                            | SSU72                         | 3.55E-06          | 3.55E-06             | 0.296517           | -3.37248                     | T down vs N                            | 50.596  | 13.0272   | 3.86209    | 1         |
| cg01059704                                            | RAD1;RAD1;BRIX1               | 0.00013181        | 0.000131814          | 0.287446           | -3.47891                     | T down vs N                            | 24.964  | 14.5579   | 9.33038    | 1         |
| cg01059818                                            | NLK                           | 0.00023347        | 0.000233473          | 0.283588           | -3.52624                     | T down vs N                            | 22.233  | 14.8752   | 10.705     | 1         |
| cg01061877                                            | KPTN                          | 8.87E-05          | 8.87E-05             | 0.216227           | -4.62477                     | T down vs N                            | 26.979  | 21.9661   | 13.0273    | 1         |
| cg01062024                                            | IMPDH2                        | 4.93E-05          | 4.93E-05             | 0.238189           | -4.19835                     | T down vs N                            | 30.149  | 19.2787   | 10.2313    | 1         |
| cg01063406                                            | ZIC3                          | 0.00051308        | 0.000513078          | 0.286628           | -5.30143                     | T down vs N                            | 18.783  | 26.058    | 22.197     | 1         |
| cg01063509                                            | PLA2G2C                       | 0.00014509        | 0.000145089          | 0.280235           | -3.56844                     | T down vs N                            | 24.492  | 15.1574   | 9.90197    | 1         |
| cg01063615                                            | TAF15;TAF15                   | 0.00058004        | 0.000580042          | 0.291892           | -3.42593                     | T down vs N                            | 18.276  | 14.2017   | 12.4329    | 1         |
| cg01064265                                            | IRX6                          | 0.00175145        | 0.00175145           | 19.1426            | 19.1426                      | T up vs N                              | 14.055  | 81.6149   | 92.9091    | 1         |
| cg01065586                                            | MOCS2;MOCS2                   | 0.00104711        | 0.00104711           | 0.166026           | -6.02316                     | T down vs N                            | 15.945  | 30.1986   | 30.3031    | 1         |
| cg01066220                                            | DDAH2                         | 0.00222349        | 0.00222349           | 3.11787            | 3.11787                      | T up vs N                              | 13.221  | 12.1114   | 14.6577    | 1         |
| cg01067405                                            | LILRA4;LILRA4                 | 0.00225306        | 0.00225306           | 0.280095           | -3.57022                     | T down vs N                            | 13.175  | 15.1693   | 18.4217    | 1         |
| cg01069965                                            | B4GALT5                       | 6.79E-05          | 6.79E-05             | 0.275733           | -3.6267                      | T down vs N                            | 28.396  | 15.5457   | 8.7594     | 1         |
| cg01070095                                            | SETD1A                        | 7.57E-06          | 7.57E-06             | 0.195825           | -5.1066                      | T down vs N                            | 42.013  | 24.9012   | 9.48323    | 1         |
| cg01070161                                            | LRCH3                         | 0.0015142         | 0.0015142            | 0.292712           | -3.41632                     | T down vs N                            | 14.577  | 14.137    | 15.5171    | 1         |
| cg01071511                                            | MAD1L1;MAD1L1;MAD1L1          | 0.00014379        | 0.000143791          | 0.223366           | -4.47696                     | T down vs N                            | 24.536  | 21.0442   | 13.723     | 1         |
| cg01072969                                            | SNAR-F                        | 0.00056504        | 0.000565042          | 0.291183           | -3.43426                     | T down vs N                            | 18.384  | 14.2578   | 12.409     | 1         |
| cg01074365                                            | EPS8L2                        | 2.25E-05          | 2.25E-05             | 0.302168           | -3.30942                     | T down vs N                            | 34.768  | 13.4148   | 6.17345    | 1         |
| cg01076217                                            | IL20RA                        | 5.84E-05          | 5.84E-05             | 0.303574           | -3.29409                     | T down vs N                            | 29.209  | 13.311    | 7.29142    | 1         |
| cg01077178                                            | COMMD3;BMI1                   | 0.00611442        | 0.00611442           | 0.223613           | -4.472                       | T down vs N                            | 9.9619  | 21.0131   | 33.7494    | 1         |
| cg01079738                                            | C1orf14;C1orf14               | 0.00210784        | 0.00210784           | 3.21407            | 3.21407                      | T up vs N                              | 13.405  | 12.7674   | 15.2389    | 1         |
| cg01081096                                            | ATG9B;ATG9B                   | 6.46E-06          | 6.46E-06             | 0.321217           | -3.11316                     | T down vs N                            | 43.147  | 12.0793   | 4.47928    | 1         |
| cg01081346                                            | CPT1B;CPT1B;CPT1B;CPT1B;CHKB- | 0.00481967        | 0.00481967           | 3.22125            | 3.22125                      | T up vs N                              | 10.689  | 12.8163   | 19.1838    | 1         |
|                                                       | CPT1B;CPT1B;CPT1B;CPT1B       |                   |                      |                    |                              |                                        |         |           |            |           |
| cg01081718                                            | ATG3                          | 0.00134975        | 0.00134975           | 0.289906           | -3.4494                      | T down vs N                            | 14.996  | 14.3596   | 15.3207    | 1         |
| cg01082299                                            | HCP5                          | 0.00042406        | 0.000424062          | 0.29174            | -3.42771                     | T down vs N                            | 19.586  | 14.2137   | 11.6111    | 1         |
| cg01085974                                            | ESPN                          | 0.0001547         | 0.000154697          | 0.249232           | -4.01233                     | T down vs N                            | 24.179  | 18.08     | 11.9639    | 1         |
| cg01087775                                            | ATRX;ATRX                     | 0.00034409        | 0.000344089          | 0.249969           | -4.00049                     | T down vs N                            | 20.49   | 18.0032   | 14.058     | 1         |
| cg01089751                                            | APOBEC3B;APOBEC3B             | 2.63E-05          | 2.63E-05             | 0.29505            | -3.38926                     | T down vs N                            | 33.821  | 13.9546   | 6.60156    | 1         |
| cg01092293                                            | LY75                          | 0.00155347        | 0.00155347           | 5.6023             | 5.6023                       | T up vs N                              | 14.484  | 27.8113   | 30.7213    | 1         |
| cg01093088                                            | PGLYRP4                       | 1.45E-06          | 1.45E-06             | 0.190213           | -5.25727                     | T down vs N                            | 55.087  | 25.7973   | 7.49284    | 1         |
| cg01095157                                            | GORASP2                       | 4.52E-06          | 4.52E-06             | 0.167985           | -5.9529                      | T down vs N                            | 45.801  | 29.8052   | 10.4121    | 1         |
| KIAA0040;KIAA0040;KIAA0040;KIAA0040;KIAA0040;KIAA0040 |                               |                   |                      |                    |                              |                                        |         |           |            |           |
| cg01095590                                            | 40;KIAA0040;KIAA0040          | 0.00064158        | 0.000641576          | 6.78707            | 6.78707                      | T up vs N                              | 17.866  | 34.3485   | 30.7617    | 1         |
| cg01098474                                            | ZNF716                        | 0.00090507        | 0.000905065          | 0.286931           | -3.48516                     | T down vs N                            | 16.504  | 14.5999   | 14.1542    | 1         |
| cg01099825                                            | COBRA1                        | 7.62E-05          | 7.62E-05             | 0.237448           | -4.21145                     | T down vs N                            | 27.777  | 19.3626   | 11.1531    | 1         |
| cg01101020                                            | EP40                          | 0.0007316         | 0.000731598          | 0.280959           | -3.55924                     | T down vs N                            | 17.339  | 15.0959   | 13.9303    | 1         |
| cg01103827                                            | PSMG1;PSMG1                   | 0.00050813        | 0.000508132          | 0.279556           | -3.5771                      | T down vs N                            | 18.823  | 15.2152   | 12.933     | 1         |
| cg01106572                                            | ACCN3;ACCN3;ABCB8;ACCN3       | 0.00043223        | 0.000432229          | 0.229824           | -4.35115                     | T down vs N                            | 19.505  | 20.2514   | 16.6123    | 1         |
| cg01107874                                            | C10orf41;C10orf41             | 3.28E-06          | 3.28E-06             | 8.52706            | 8.52706                      | T up vs N                              | 48.274  | 43.0234   | 14.2598    | 1         |
| cg01109256                                            | RALGAPB                       | 0.00038808        | 0.000388084          | 0.324798           | -3.07884                     | T down vs N                            | 19.967  | 11.8446   | 9.49142    | 1         |
| cg01109535                                            | SLC5A11                       | 5.76E-05          | 5.76E-05             | 0.274773           | -3.63937                     | T down vs N                            | 29.287  | 15.63     | 8.53894    | 1         |
| cg01109574                                            | FEZ2;FEZ2                     | 0.00568825        | 0.00568825           | 0.237077           | -4.21804                     | T down vs N                            | 10.18   | 19.4047   | 30.4976    | 1         |
| cg01110312                                            | EIF2B1;GTF2H3                 | 9.14E-06          | 9.14E-06             | 0.254839           | -3.92405                     | T down vs N                            | 40.69   | 17.5056   | 6.88355    | 1         |
| cg01110759                                            | MT1A                          | 2.24E-05          | 2.24E-05             | 26.3759            | 26.3759                      | T up vs N                              | 34.804  | 100.302   | 46.1104    | 1         |
| cg01112805                                            | FREM2                         | 0.00138081        | 0.00138081           | 3.38163            | 3.38163                      | T up vs N                              | 14.913  | 13.9031   | 14.9166    | 1         |
| cg01114088                                            | CYTL1                         | 1.27E-05          | 1.27E-05             | 0.245061           | -4.08063                     | T down vs N                            | 38.457  | 18.522    | 7.70596    | 1         |
| cg01115565                                            | PTPRU;PTPRU;PTPRU             | 3.73E-05          | 3.73E-05             | 0.129626           | -7.71453                     | T down vs N                            | 31.741  | 39.097    | 19.7082    | 1         |
| cg01117697                                            | C1QL4                         | 0.00505573        | 0.00505573           | 3.45461            | 3.45461                      | T up vs N                              | 10.541  | 14.3947   | 21.8489    | 1         |
| cg01122167                                            | CAMK2A;CAMK2A                 | 5.55E-05          | 5.55E-05             | 0.256012           | -3.90607                     | T down vs N                            | 29.489  | 17.3882   | 9.43445    | 1         |
| cg01128482                                            | HOXD3                         | 7.23E-05          | 7.23E-05             | 14.7577            | 14.7577                      | T up vs N                              | 28.054  | 67.8634   | 38.7043    | 1         |
| cg01129246                                            | GRXC1                         | 2.56E-06          | 2.56E-06             | 0.116739           | -8.56609                     | T down vs N                            | 50.278  | 43.207    | 13.7497    | 1         |
| cg01131699                                            | ARHGEF6;ARHGEF6               | 0.00086975        | 0.000869753          | 0.235371           | -4.24861                     | T down vs N                            | 16.658  | 19.5999   | 18.8254    | 1         |
| cg01132696                                            | HLA-DPB1                      | 0.00107394        | 0.00107394           | 6.35013            | 6.35013                      | T up vs N                              | 15.849  | 32.0028   | 32.308     | 1         |
| cg01134144                                            | ARHGEF6                       | 0.00017884        | 0.000178841          | 0.28608            | -3.49552                     | T down vs N                            | 23.482  | 14.6694   | 9.99537    | 1         |
| cg01134274                                            | CLK2                          | 1.44E-05          | 1.44E-05             | 0.290686           | -3.44014                     | T down vs N                            | 37.633  | 14.2973   | 6.0787     | 1         |
| cg01134643                                            | UCN3                          | 1.11E-08          | 1.11E-08             | 0.146788           | -6.81255                     | T down vs N                            | 113.82  | 34.4831   | 4.84756    | 1         |
| cg01134794                                            | CXCL13                        | 3.40E-06          | 3.40E-06             | 0.294734           | -3.39289                     | T down vs N                            | 47.988  | 13.9791   | 4.66081    | 1         |
| cg01135754                                            | IRX3                          | 5.40E-05          | 5.40E-05             | 8.46903            | 8.46903                      | T up vs N                              | 29.64   | 42.7497   | 23.077     | 1         |
| cg01135800                                            | SLC22A9                       | 2.80E-07          | 2.80E-07             | 0.130461           | -7.66511                     | T down vs N                            | 71.047  | 38.8514   | 8.74946    | 1         |
| cg01135950                                            | SLC6A3                        | 0.00016924        | 0.000169237          | 0.202283           | -4.94356                     | T down vs N                            | 23.746  | 23.92     | 16.1174    | 1         |
| cg01136848                                            | VPRBP                         | 0.00073774        | 0.000737741          | 0.251676           | -3.97336                     | T down vs N                            | 17.306  | 17.8269   | 16.482     | 1         |

| Probeset ID | UCSC_REFGENE_NAME                                                                               | p-value<br>(Type) | p-value (T vs.<br>N) | Ratio (T<br>vs. N) | Fold-<br>Change (T<br>vs. N) | Fold-Change (T vs.<br>N) (Description) | F(Type) | SS (Type) | SS (Error) | F (Error) |
|-------------|-------------------------------------------------------------------------------------------------|-------------------|----------------------|--------------------|------------------------------|----------------------------------------|---------|-----------|------------|-----------|
| cg01136942  | GSN;GSN;GSN;GSN;GSN;GSN;GSN                                                                     | 0.00224397        | 0.00224397           | 3.49703            | 3.49703                      | T up vs N                              | 13.189  | 14.6795   | 17.8082    | 1         |
| cg01137955  | CASKIN1                                                                                         | 5.40E-05          | 5.40E-05             | 17.5865            | 17.5865                      | T up vs N                              | 29.649  | 76.9941   | 41.5503    | 1         |
| cg01139651  | WDR46;WDR46                                                                                     | 0.00031051        | 0.000310509          | 0.242122           | -4.13016                     | T down vs N                            | 20.943  | 18.8411   | 14.394     | 1         |
| cg01139861  | IKZF1                                                                                           | 0.00071357        | 0.000713566          | 5.59205            | 5.59205                      | T up vs N                              | 17.438  | 27.7522   | 25.4634    | 1         |
| cg01142721  | LRIT2                                                                                           | 0.0014299         | 0.0014299            | 0.325624           | -3.07102                     | T down vs N                            | 14.785  | 11.7911   | 12.76      | 1         |
| cg01145572  | FAM90A10                                                                                        | 8.77E-05          | 8.77E-05             | 0.326131           | -3.06625                     | T down vs N                            | 27.036  | 11.7585   | 6.95874    | 1         |
| cg01145829  | CA5A                                                                                            | 1.27E-06          | 1.27E-06             | 0.165447           | -6.04423                     | T down vs N                            | 56.268  | 30.3161   | 8.62055    | 1         |
| cg01146320  | OAF                                                                                             | 2.22E-05          | 2.22E-05             | 0.233981           | -4.27386                     | T down vs N                            | 34.873  | 19.7608   | 9.06649    | 1         |
| cg01146808  | PRDM1;PRDM1                                                                                     | 0.00027151        | 0.000271513          | 0.242464           | -4.12433                     | T down vs N                            | 21.544  | 18.8036   | 13.9646    | 1         |
| cg01150105  | NAALADL2                                                                                        | 0.00029305        | 0.000293047          | 0.261829           | -3.81929                     | T down vs N                            | 21.201  | 16.8195   | 12.6932    | 1         |
| cg01151642  | ADH1B                                                                                           | 1.38E-06          | 1.38E-06             | 0.220263           | -4.54002                     | T down vs N                            | 55.495  | 21.4388   | 6.18115    | 1         |
| cg01152019  | HOXD4;MIR10B                                                                                    | 0.00161501        | 0.00161501           | 8.90152            | 8.90152                      | T up vs N                              | 14.345  | 44.7662   | 9.49323    | 1         |
| cg01153475  | DDX42;DDX42                                                                                     | 0.00457473        | 0.00457473           | 0.185281           | -5.3972                      | T down vs N                            | 10.852  | 26.6204   | 39.2493    | 1         |
| cg01153946  | LOC388796;SNORA71D;LOC388796                                                                    | 1.26E-05          | 1.26E-05             | 0.116157           | -8.60903                     | T down vs N                            | 38.485  | 43.4084   | 18.047     | 1         |
| cg01154445  | NRP2;NRP2;NRP2;NRP2;NRP2;NRP2                                                                   | 4.28E-06          | 4.28E-06             | 0.099529           | -10.0474                     | T down vs N                            | 46.209  | 49.8624   | 17.2648    | 1         |
| cg01154966  | TRPC4AP;TRPC4AP                                                                                 | 0.00596488        | 0.00596488           | 0.144897           | -6.90146                     | T down vs N                            | 10.037  | 34.9507   | 55.7175    | 1         |
| cg01156077  | LOC100132215                                                                                    | 5.71E-05          | 5.71E-05             | 5.59945            | 5.59945                      | T up vs N                              | 29.335  | 27.7949   | 15.1601    | 1         |
| cg01161877  | UBLCP1                                                                                          | 0.00030862        | 0.000308618          | 0.316529           | -3.15927                     | T down vs N                            | 20.97   | 12.3941   | 9.45646    | 1         |
| cg01165362  | OR1411                                                                                          | 1.38E-05          | 1.38E-05             | 0.157125           | -6.36437                     | T down vs N                            | 37.903  | 32.0805   | 13.5422    | 1         |
| cg01169021  | PCDHGA4;PCDHGA6;PCDHGA9;PCDHG<br>A1;PCDHGA8;PCDHGA5;PCDHGB1;PC<br>DHGA10;PCDHGB4;PCDHGA3;PCDHGA | 0.00058118        | 0.000581183          | 4.61416            | 4.61416                      | T up vs N                              | 18.268  | 21.9003   | 19.1812    | 1         |
| cg01171212  | HOXD3                                                                                           | 1.59E-05          | 1.59E-05             | 5.20318            | 5.20318                      | T up vs N                              | 36.963  | 25.4768   | 11.028     | 1         |
| cg01171339  | HIST1H2AL                                                                                       | 3.23E-05          | 3.23E-05             | 4.34778            | 4.34778                      | T up vs N                              | 32.598  | 20.2301   | 9.92949    | 1         |
| cg01173794  | ETV2                                                                                            | 1.10E-05          | 1.10E-05             | 0.203376           | -4.917                       | T down vs N                            | 39.396  | 23.759    | 9.64943    | 1         |
| cg01174264  | ANTXR2;ANTXR2                                                                                   | 1.31E-05          | 1.31E-05             | 0.287056           | -3.48364                     | T down vs N                            | 38.25   | 14.5897   | 6.10295    | 1         |
| cg01175220  | C20orf160                                                                                       | 6.19E-05          | 6.19E-05             | 0.303476           | -3.29515                     | T down vs N                            | 28.892  | 13.3182   | 7.37541    | 1         |
| cg01177854  | ESRP2                                                                                           | 8.20E-06          | 8.20E-06             | 4.76025            | 4.76025                      | T up vs N                              | 41.445  | 22.8023   | 8.80281    | 1         |
| cg01178070  | PLXDC2                                                                                          | 3.91E-05          | 3.91E-05             | 0.327448           | -3.05392                     | T down vs N                            | 31.475  | 11.674    | 5.93439    | 1         |
| cg01181817  | MST1R                                                                                           | 2.53E-06          | 2.53E-06             | 25.9112            | 25.9112                      | T up vs N                              | 50.362  | 99.2148   | 31.5203    | 1         |
| cg01182683  | KRT80;KRT80                                                                                     | 0.00025702        | 0.00025702           | 0.281352           | -3.55427                     | T down vs N                            | 21.793  | 15.0627   | 11.0587    | 1         |
| cg01182697  | C1orf83;TMEM59                                                                                  | 3.29E-05          | 3.29E-05             | 0.258426           | -3.86957                     | T down vs N                            | 32.48   | 17.1494   | 8.44794    | 1         |
| cg01184282  | OR9A4                                                                                           | 0.00029582        | 0.000295822          | 0.249524           | -4.00763                     | T down vs N                            | 21.159  | 18.0495   | 13.6486    | 1         |
| cg01184449  | EML4;EML4                                                                                       | 2.13E-06          | 2.13E-06             | 4.31688            | 4.31688                      | T up vs N                              | 51.789  | 20.0342   | 6.18952    | 1         |
| cg01184539  | FAM26D;BET3L                                                                                    | 0.00044562        | 0.000445622          | 0.31425            | -3.18218                     | T down vs N                            | 19.375  | 12.5503   | 10.3639    | 1         |
| cg01186595  | CHORDC1;CHORDC1                                                                                 | 3.13E-06          | 3.13E-06             | 0.108708           | -9.19897                     | T down vs N                            | 48.647  | 46.1224   | 15.1695    | 1         |
| cg01187883  | MASP1;MASP1                                                                                     | 7.22E-05          | 7.22E-05             | 0.287746           | -3.47529                     | T down vs N                            | 28.066  | 14.5336   | 8.28551    | 1         |
| cg01189112  | TMEM61;TMEM61                                                                                   | 0.00055817        | 0.00055817           | 3.64722            | 3.64722                      | T up vs N                              | 18.434  | 15.6822   | 13.6114    | 1         |
| cg01192291  | ZKSCAN4                                                                                         | 0.00481075        | 0.00481075           | 0.290578           | -3.44142                     | T down vs N                            | 10.695  | 14.306    | 21.402     | 1         |
| cg01193954  | HEPH1;HEPH1;HEPH                                                                                | 0.00129584        | 0.00129584           | 0.156565           | -6.38711                     | T down vs N                            | 15.147  | 32.2042   | 34.019     | 1         |
| cg01195803  | HSPA1L                                                                                          | 0.00010173        | 0.000101734          | 0.309695           | -3.22898                     | T down vs N                            | 26.269  | 12.6889   | 7.8383     | 1         |
| cg01195861  | POP5;POP5                                                                                       | 0.00345223        | 0.00345223           | 0.273354           | -3.65826                     | T down vs N                            | 12.017  | 14.8287   | 18.5093    | 1         |
| cg01199603  | MSRB3;MSRB3                                                                                     | 8.50E-05          | 8.50E-05             | 0.300182           | -3.33131                     | T down vs N                            | 27.202  | 13.563    | 7.97775    | 1         |
| cg01201782  | IFT140                                                                                          | 0.00028932        | 0.000289323          | 0.318302           | -3.14167                     | T down vs N                            | 21.259  | 12.274    | 9.23789    | 1         |
| cg01201797  | FZD5                                                                                            | 5.31E-06          | 5.31E-06             | 8.09568            | 8.09568                      | T up vs N                              | 44.587  | 40.9644   | 14.7001    | 1         |
| cg01201932  | CMA1                                                                                            | 5.53E-05          | 5.53E-05             | 0.172407           | -5.80021                     | T down vs N                            | 29.512  | 28.9432   | 15.6918    | 1         |
| cg01202150  | PCDHA7;PCDHA12;PCDHA6;PCDHA10;<br>PCDHA4;PCDHA11;PCDHA8;PCDHA1;P<br>CDHA2;PCDHA6;PCDHA1;PCDHA9; | 0.00016229        | 0.00016229           | 11.1625            | 11.1625                      | T up vs N                              | 23.948  | 54.5152   | 36.4232    | 1         |
| cg01202296  | IL17B                                                                                           | 7.97E-05          | 7.97E-05             | 0.292522           | -3.41855                     | T down vs N                            | 27.537  | 14.152    | 8.22291    | 1         |
| cg01204982  | SLCO2B1;SLCO2B1;SLCO2B1                                                                         | 7.41E-05          | 7.41E-05             | 0.26761            | -3.73677                     | T down vs N                            | 27.924  | 16.2757   | 9.32581    | 1         |
| cg01205831  | DPM2                                                                                            | 7.68E-06          | 7.68E-06             | 0.21874            | -4.57163                     | T down vs N                            | 41.908  | 21.6359   | 8.26036    | 1         |
| cg01208787  | CHN2;CHN2                                                                                       | 0.00024561        | 0.000245614          | 3.35732            | 3.35732                      | T up vs N                              | 22      | 13.7389   | 9.99181    | 1         |
| cg01211137  | SPON1                                                                                           | 0.00065604        | 0.000656044          | 0.27727            | -3.60659                     | T down vs N                            | 17.776  | 15.4119   | 13.8725    | 1         |
| cg01212326  | POU2AF1                                                                                         | 1.54E-05          | 1.54E-05             | 3.02479            | 3.02479                      | T up vs N                              | 37.201  | 11.4744   | 4.93508    | 1         |
| cg01213381  | OTX2                                                                                            | 0.00031892        | 0.000318921          | 0.220731           | -4.53041                     | T down vs N                            | 20.825  | 21.3787   | 16.4256    | 1         |
| cg01214340  | PHF11;PHF11                                                                                     | 0.00044664        | 0.000446638          | 4.97874            | 4.97874                      | T up vs N                              | 19.366  | 24.1328   | 19.9385    | 1         |
| cg01214458  | MN1                                                                                             | 0.00013092        | 0.00013092           | 3.90453            | 3.90453                      | T up vs N                              | 24.998  | 17.3782   | 11.1229    | 1         |
| cg01219426  | MAML2                                                                                           | 0.00065633        | 0.000656328          | 0.301721           | -3.31432                     | T down vs N                            | 17.774  | 13.448    | 12.106     | 1         |
| cg01222719  | PTCH1;PTCH1                                                                                     | 0.00024873        | 0.000248726          | 0.329044           | -3.03911                     | T down vs N                            | 21.943  | 11.5726   | 8.43841    | 1         |
| cg01223011  | KIAA1257                                                                                        | 0.00380292        | 0.00380292           | 0.28393            | -3.52199                     | T down vs N                            | 11.437  | 14.8468   | 20.7701    | 1         |
| cg01223204  | ZNF280B                                                                                         | 0.00284741        | 0.00284741           | 0.315642           | -3.16815                     | T down vs N                            | 12.383  | 12.4546   | 16.0927    | 1         |
| cg01225525  | TKTL2                                                                                           | 4.86E-05          | 4.86E-05             | 0.187446           | -5.33488                     | T down vs N                            | 30.233  | 26.2549   | 13.8949    | 1         |
| cg01229421  | PRM2                                                                                            | 2.09E-05          | 2.09E-05             | 0.274912           | -3.63753                     | T down vs N                            | 35.245  | 15.6178   | 7.09004    | 1         |
| cg01229506  | FAM170A;FAM170A                                                                                 | 9.12E-06          | 9.12E-06             | 0.245668           | -4.07054                     | T down vs N                            | 40.709  | 18.4568   | 7.25424    | 1         |
| cg01229998  | MS4A4A;MS4A4A                                                                                   | 3.60E-06          | 3.60E-06             | 0.152369           | -6.56304                     | T down vs N                            | 47.541  | 33.155    | 11.1584    | 1         |
| cg01230207  | LOC284379                                                                                       | 0.00018201        | 0.000182009          | 0.173478           | -5.76444                     | T down vs N                            | 23.398  | 28.7399   | 19.6526    | 1         |
| cg01231108  | KCNJ3                                                                                           | 0.00457113        | 0.00457113           | 9.6732             | 9.6732                       | T up vs N                              | 10.854  | 48.2357   | 71.1027    | 1         |

| Probeset ID | UCSC_REFGENE_NAME               | p-value<br>(Type) | p-value (T vs.<br>N) | Ratio (T<br>vs. N) | Fold-<br>Change (T<br>vs. N) | Fold-Change (T vs.<br>N) (Description) | F(Type) | SS (Type) | SS (Error) | F (Error) |
|-------------|---------------------------------|-------------------|----------------------|--------------------|------------------------------|----------------------------------------|---------|-----------|------------|-----------|
| cg01232726  | TMPRSS5                         | 7.42E-06          | 7.42E-06             | 0.172306           | -5.80362                     | T down vs N                            | 42.154  | 28.9626   | 10.9931    | 1         |
| cg01232748  | CHIC2                           | 2.55E-05          | 2.55E-05             | 0.3131             | -3.19386                     | T down vs N                            | 34.019  | 12.6299   | 5.94017    | 1         |
| cg01233948  | TRPM1                           | 0.00078702        | 0.000787019          | 0.207396           | -4.82169                     | T down vs N                            | 17.05   | 23.1786   | 21.7517    | 1         |
| cg01235116  | SNX20;SNX20                     | 0.00301589        | 0.00301589           | 4.95371            | 4.95371                      | T up vs N                              | 12.192  | 23.9815   | 31.4717    | 1         |
| cg01235820  | SCRT2                           | 0.00345006        | 0.00345006           | 6.05937            | 6.05937                      | T up vs N                              | 11.751  | 30.4006   | 41.392     | 1         |
| cg01236027  | TMEM174                         | 3.38E-05          | 3.38E-05             | 0.173156           | -5.77514                     | T down vs N                            | 32.32   | 28.8008   | 14.2578    | 1         |
| cg01239735  | IQSEC3;IQSEC3                   | 0.00274416        | 0.00274416           | 3.4374             | 3.4374                       | T up vs N                              | 12.506  | 14.2789   | 18.2679    | 1         |
| cg01240444  | DNAH10;DNAH10                   | 9.64E-05          | 9.64E-05             | 5.248              | 5.248                        | T up vs N                              | 26.544  | 25.7425   | 15.517     | 1         |
| cg01242348  | CEBPE                           | 0.00030813        | 0.000308127          | 0.319254           | -3.1323                      | T down vs N                            | 20.978  | 12.2101   | 9.31289    | 1         |
| cg01242426  | ORS6A1                          | 6.87E-06          | 6.87E-06             | 0.288247           | -3.46925                     | T down vs N                            | 42.705  | 14.493    | 5.43005    | 1         |
| cg01244015  | FAM124B;FAM124B                 | 0.00138344        | 0.00138344           | 0.280431           | -3.56593                     | T down vs N                            | 14.906  | 15.1406   | 16.252     | 1         |
| cg01244043  | NSFL1C;NSFL1C                   | 2.22E-06          | 2.22E-06             | 0.096155           | -10.3998                     | T down vs N                            | 51.427  | 51.3638   | 15.9803    | 1         |
| cg01244651  | TMEM125                         | 1.66E-07          | 1.66E-07             | 0.204123           | -4.89901                     | T down vs N                            | 76.816  | 23.6498   | 4.92602    | 1         |
| cg01246961  | NEU2                            | 3.28E-06          | 3.28E-06             | 0.26036            | -3.84083                     | T down vs N                            | 48.284  | 16.961    | 5.62038    | 1         |
| cg01246982  | HLA-DPB2                        | 4.77E-05          | 4.77E-05             | 0.277025           | -3.60978                     | T down vs N                            | 30.339  | 15.4331   | 8.13908    | 1         |
| cg01247127  | SIRPD                           | 4.14E-05          | 4.14E-05             | 0.193571           | -5.16607                     | T down vs N                            | 31.145  | 25.2562   | 12.9748    | 1         |
| cg01250703  | GTSF1                           | 3.62E-06          | 3.62E-06             | 0.261936           | -3.81772                     | T down vs N                            | 47.502  | 16.8092   | 5.66176    | 1         |
| cg01251360  | CDH1                            | 0.00280592        | 0.00280592           | 4.89903            | 4.89903                      | T up vs N                              | 12.432  | 23.65     | 30.438     | 1         |
| cg01251835  | SCARF2;SCARF2                   | 1.42E-06          | 1.42E-06             | 7.26167            | 7.26167                      | T up vs N                              | 55.235  | 36.816    | 10.6645    | 1         |
| cg01254303  | SRRM4                           | 0.00062069        | 0.000620692          | 6.62776            | 6.62776                      | T up vs N                              | 18      | 33.5017   | 29.7797    | 1         |
| cg01254505  | BST2                            | 6.90E-06          | 6.90E-06             | 0.22836            | -4.37906                     | T down vs N                            | 42.681  | 20.4279   | 7.65788    | 1         |
| cg01255486  | SRP19                           | 0.00623189        | 0.00623189           | 0.303114           | -3.29909                     | T down vs N                            | 9.9048  | 13.3448   | 21.557     | 1         |
| cg01255894  | GATA3;GATA3                     | 0.00220354        | 0.00220354           | 0.248454           | -4.02489                     | T down vs N                            | 13.252  | 18.1614   | 21.9282    | 1         |
| cg01257799  | CXCR5                           | 9.73E-05          | 9.73E-05             | 0.319573           | -3.12917                     | T down vs N                            | 26.498  | 12.1887   | 7.35979    | 1         |
| cg01257975  | CACNA1I;CACNA1I                 | 6.02E-05          | 6.02E-05             | 7.11833            | 7.11833                      | T up vs N                              | 29.042  | 36.0793   | 19.8768    | 1         |
| cg01258050  | KNDC1                           | 0.00015654        | 0.000156544          | 0.214165           | -4.6693                      | T down vs N                            | 24.122  | 22.2419   | 14.7531    | 1         |
| cg01259871  | POLR3H;POLR3H;POLR3H            | 1.52E-05          | 1.52E-05             | 0.221867           | -4.50721                     | T down vs N                            | 37.284  | 21.2337   | 9.11226    | 1         |
| cg01261351  | GFRA1;GFRA1;GFRA1               | 0.00027888        | 0.000278875          | 5.44664            | 5.44664                      | T up vs N                              | 21.424  | 26.9092   | 20.0967    | 1         |
| cg01262290  | OR6V1                           | 2.27E-06          | 2.27E-06             | 0.227352           | -4.39846                     | T down vs N                            | 51.261  | 20.5504   | 6.41439    | 1         |
| cg01264087  | PRHOXNB                         | 0.00030895        | 0.000308948          | 0.279537           | -3.57734                     | T down vs N                            | 20.966  | 15.2168   | 11.6127    | 1         |
| cg01264751  | BET1                            | 0.00188638        | 0.00188638           | 0.290335           | -3.4443                      | T down vs N                            | 13.793  | 14.3253   | 16.6179    | 1         |
| cg01268381  | DSCAM                           | 0.00194571        | 0.00194571           | 0.300584           | -3.32685                     | T down vs N                            | 13.684  | 13.5329   | 15.8233    | 1         |
| cg01268704  | NR2E1                           | 7.92E-05          | 7.92E-05             | 0.207532           | -4.81854                     | T down vs N                            | 27.572  | 23.1594   | 13.4392    | 1         |
| cg01270001  | LRR61;ACTR3C;LRR61;LRR61;LRR61  | 0.00026882        | 0.000268819          | 16.1039            | 16.1039                      | T up vs N                              | 21.59   | 72.3365   | 53.6087    | 1         |
| cg01271455  | PTPRN2;PTPRN2;PTPRN2            | 0.0034589         | 0.0034589            | 0.285301           | -3.50506                     | T down vs N                            | 12.011  | 13.8667   | 17.3178    | 1         |
| cg01272937  | USP10                           | 0.00034006        | 0.000340056          | 0.13056            | -7.65933                     | T down vs N                            | 20.542  | 38.8226   | 30.2388    | 1         |
| cg01274660  | TRIP6                           | 3.10E-06          | 3.10E-06             | 3.5392             | 3.5392                       | T up vs N                              | 48.728  | 14.9619   | 4.91282    | 1         |
| cg01275038  | SORCS2                          | 5.58E-05          | 5.58E-05             | 0.159246           | -6.2796                      | T down vs N                            | 29.464  | 31.6173   | 17.1691    | 1         |
| cg01275521  | LLGL2;LLGL2;LLGL2               | 0.00079135        | 0.000791346          | 0.315935           | -3.16521                     | T down vs N                            | 17.028  | 12.4346   | 11.6839    | 1         |
| cg01275697  | INPP4A;INPP4A;INPP4A            | 0.00389473        | 0.00389473           | 0.326167           | -3.06591                     | T down vs N                            | 11.361  | 11.7562   | 16.557     | 1         |
| cg01277155  | LC26A5                          | 0.00040774        | 0.000407735          | 6.66126            | 6.66126                      | T up vs N                              | 19.754  | 33.6806   | 27.2796    | 1         |
| cg01279654  | VGLL4                           | 1.88E-05          | 1.88E-05             | 0.190828           | -5.24032                     | T down vs N                            | 35.894  | 25.697    | 11.4547    | 1         |
| cg01281450  | IFNG                            | 1.81E-05          | 1.81E-05             | 0.280442           | -3.56579                     | T down vs N                            | 36.161  | 15.1397   | 6.69875    | 1         |
| cg01284306  | C21orf91;C21orf91;C21orf91      | 0.00057241        | 0.000572408          | 0.261632           | -3.82216                     | T down vs N                            | 18.331  | 16.8384   | 14.6975    | 1         |
| cg01285706  | BMP3                            | 0.00041081        | 0.000410805          | 4.99442            | 4.99442                      | T up vs N                              | 19.722  | 24.2274   | 19.655     | 1         |
| cg01286685  | RNF39;RNF39                     | 0.00162759        | 0.00162759           | 4.31419            | 4.31419                      | T up vs N                              | 14.317  | 20.0172   | 22.3706    | 1         |
| cg01287088  | PFN3                            | 2.82E-05          | 2.82E-05             | 19.7209            | 19.7209                      | T up vs N                              | 33.391  | 83.269    | 39.8997    | 1         |
| cg01287218  | RETNLB                          | 7.97E-05          | 7.97E-05             | 0.222351           | -4.49739                     | T down vs N                            | 27.538  | 21.1722   | 12.3014    | 1         |
| cg01287476  | C2orf65                         | 0.00014323        | 0.000143228          | 3.53185            | 3.53185                      | T up vs N                              | 24.555  | 14.9127   | 9.71708    | 1         |
| cg01287505  | SEPT4;SEPT4;SEPT4               | 0.00051138        | 0.000511378          | 4.74821            | 4.74821                      | T up vs N                              | 18.797  | 22.7283   | 19.3465    | 1         |
| cg01288089  | CXCL10;ART3                     | 4.39E-06          | 4.39E-06             | 0.170136           | -5.87765                     | T down vs N                            | 46.017  | 29.3816   | 10.2159    | 1         |
| cg01289421  | B3GNT3                          | 0.00063485        | 0.000634854          | 0.256541           | -3.89802                     | T down vs N                            | 17.908  | 17.3356   | 15.4884    | 1         |
| cg01290856  | NCKAP5;NCKAP5                   | 0.00029741        | 0.000297407          | 0.2729             | -3.66435                     | T down vs N                            | 21.135  | 15.796    | 11.958     | 1         |
| cg01291404  | COL2A1;COL2A1                   | 0.00100642        | 0.00100642           | 3.98632            | 3.98632                      | T up vs N                              | 16.096  | 17.9111   | 17.8046    | 1         |
| cg01291920  | CFB                             | 0.00024061        | 0.000240606          | 0.325307           | -3.07402                     | T down vs N                            | 22.095  | 11.8117   | 8.5535     | 1         |
| cg01292613  | NLRP8                           | 0.00016322        | 0.000163216          | 0.191272           | -5.22815                     | T down vs N                            | 23.92   | 25.6249   | 17.1404    | 1         |
| cg01292722  | CLRN1;CLRN1OS                   | 0.00017139        | 0.000171393          | 0.287688           | -3.47599                     | T down vs N                            | 23.685  | 14.5383   | 9.82106    | 1         |
| cg01294327  | LINGO3                          | 0.00025832        | 0.000258316          | 7.21089            | 7.21089                      | T up vs N                              | 21.77   | 36.5558   | 26.8666    | 1         |
| cg01295782  | EIF4E3;EIF4E3;EIF4E3;EIF4E3     | 0.0002117         | 0.000211698          | 0.111695           | -8.95292                     | T down vs N                            | 22.687  | 45.0023   | 31.7382    | 1         |
| cg01296395  | CRIM1                           | 2.04E-07          | 2.04E-07             | 0.286828           | -3.48641                     | T down vs N                            | 74.518  | 14.6083   | 3.13658    | 1         |
| cg01296532  | VEPH1;VEPH1;VEPH1;VEPH1;VEPH1;V | 0.00154336        | 0.00154336           | 3.30863            | 3.30863                      | T up vs N                              | 14.508  | 13.4095   | 14.7885    | 1         |
| cg01298120  | KCNQ1;KCNQ1                     | 0.00017994        | 0.000179943          | 0.175621           | -5.69409                     | T down vs N                            | 23.453  | 28.3384   | 19.3332    | 1         |
| cg01298514  | VEGFA;VEGFA;VEGFA;VEGFA;VEGFA;V | 0.00189615        | 0.00189615           | 0.28112            | -3.5572                      | T down vs N                            | 13.775  | 15.0823   | 17.5191    | 1         |
| cg01299997  | FIS1                            | 7.53E-06          | 7.53E-06             | 0.289916           | -3.44927                     | T down vs N                            | 42.049  | 14.3588   | 5.46367    | 1         |
| cg01300623  | OSBPL10                         | 0.00087234        | 0.000872337          | 0.312764           | -3.19729                     | T down vs N                            | 16.647  | 12.6532   | 12.1617    | 1         |
| cg01302240  | RGS3;RGS3;RGS3                  | 2.83E-05          | 2.83E-05             | 3.29433            | 3.29433                      | T up vs N                              | 33.375  | 13.3126   | 6.38211    | 1         |

| Probeset ID | UCSC_REFGENE_NAME                                           | p-value<br>(Type) | p-value (T vs.<br>N) | Ratio (T<br>vs. N) | Fold-<br>Change (T<br>vs. N) | Fold-Change (T vs.<br>N) (Description) | F(Type) | SS (Type) | SS (Error) | F (Error) |
|-------------|-------------------------------------------------------------|-------------------|----------------------|--------------------|------------------------------|----------------------------------------|---------|-----------|------------|-----------|
| cg01303183  | C16orf68                                                    | 2.11E-05          | 2.11E-05             | 0.276573           | -3.61568                     | T down vs N                            | 35.19   | 15.4724   | 7.03499    | 1         |
| cg01306120  | TOMM20                                                      | 0.00046006        | 0.000460055          | 0.269544           | -3.70997                     | T down vs N                            | 19.241  | 16.0984   | 13.3871    | 1         |
| cg01306183  | SLC22A10;SLC22A10                                           | 3.70E-07          | 3.70E-07             | 0.095889           | -10.4288                     | T down vs N                            | 68.1    | 51.4858   | 12.0965    | 1         |
| cg01306806  | KIR2DL4;KIR2DL4;KIR2DL4                                     | 4.22E-05          | 4.22E-05             | 0.197415           | -5.06547                     | T down vs N                            | 31.037  | 24.6549   | 12.7102    | 1         |
| cg01310267  | GPM6B;GPM6B<br>PARVG;PARVG;PARVG;PARVG;PARVG;               | 0.00508844        | 0.00508844           | 0.23646            | -4.22904                     | T down vs N                            | 11.002  | 17.3111   | 22.0289    | 1         |
| cg01311181  | PARVG                                                       | 0.00039907        | 0.000399072          | 0.282476           | -3.54012                     | T down vs N                            | 19.847  | 14.9681   | 12.067     | 1         |
| cg01311313  | UNC5D                                                       | 0.0001114         | 0.000111398          | 0.228826           | -4.37014                     | T down vs N                            | 25.807  | 20.3716   | 12.6302    | 1         |
| cg01312732  | BZW1;BZW1L1                                                 | 0.00099879        | 0.000998785          | 0.288135           | -3.47059                     | T down vs N                            | 16.125  | 14.5021   | 14.3898    | 1         |
| cg01312858  | CCDC85A                                                     | 5.94E-05          | 5.94E-05             | 0.27938            | -3.57936                     | T down vs N                            | 29.121  | 15.2302   | 8.36806    | 1         |
| cg01318557  | LAT2;LAT2;LAT2;LAT2;LAT2                                    | 0.00092836        | 0.000928356          | 0.253067           | -3.95153                     | T down vs N                            | 16.406  | 17.6848   | 17.2476    | 1         |
| cg01318737  | ZNF57                                                       | 4.58E-05          | 4.58E-05             | 0.291067           | -3.43564                     | T down vs N                            | 30.565  | 14.267    | 7.46848    | 1         |
| cg01319581  | CTPS2;CTPS2                                                 | 0.00315212        | 0.00315212           | 0.291778           | -3.42727                     | T down vs N                            | 12.046  | 14.2107   | 18.8747    | 1         |
| cg01321673  | IL17REL                                                     | 0.00020712        | 0.000207118          | 5.9467             | 5.9467                       | T up vs N                              | 22.789  | 29.7704   | 20.9017    | 1         |
| cg01323381  | HoxA5                                                       | 0.00038362        | 0.000383621          | 4.42516            | 4.42516                      | T up vs N                              | 20.017  | 20.7187   | 16.561     | 1         |
| cg01323954  | FAM103A1                                                    | 0.00048711        | 0.000487107          | 0.223502           | -4.47423                     | T down vs N                            | 19      | 20.10271  | 17.707     | 1         |
| cg01323993  | SNORD105;PPAN-P2RY11;PPAN                                   | 0.000359          | 0.000359004          | 0.315752           | -3.16704                     | T down vs N                            | 20.305  | 12.4471   | 9.80827    | 1         |
| cg01324212  | LRPAP1                                                      | 5.43E-06          | 5.43E-06             | 0.218197           | -4.58302                     | T down vs N                            | 44.423  | 21.7068   | 7.81832    | 1         |
| cg01324543  | CCDC30                                                      | 2.97E-06          | 2.97E-06             | 0.172623           | -5.79298                     | T down vs N                            | 49.065  | 28.9022   | 9.42505    | 1         |
| cg01326206  | DHX30;DHX30                                                 | 0.00013012        | 0.000130117          | 0.215934           | -3.16522                     | T down vs N                            | 25.029  | 12.4347   | 7.9491     | 1         |
| cg01327147  | KIAA1161                                                    | 0.00016597        | 0.00016597           | 3.58748            | 3.58748                      | T up vs N                              | 23.84   | 15.2844   | 10.2582    | 1         |
| cg01327567  | TMED6                                                       | 0.00022166        | 0.000221656          | 0.328111           | -3.04775                     | T down vs N                            | 22.473  | 11.6318   | 8.28144    | 1         |
| cg01327602  | SHISA7                                                      | 5.74E-05          | 5.74E-05             | 4.86676            | 4.86676                      | T up vs N                              | 29.311  | 23.4536   | 12.8025    | 1         |
| cg01331992  | RPS6                                                        | 8.89E-05          | 8.89E-05             | 0.209347           | -4.77675                     | T down vs N                            | 26.963  | 22.9035   | 13.5912    | 1         |
| cg01332683  | ABCC1;ABCC1;ABCC1;ABCC1;ABCC1                               | 2.98E-05          | 2.98E-05             | 0.202848           | -4.9298                      | T down vs N                            | 33.07   | 23.8367   | 11.5326    | 1         |
| cg01333011  | PTHLH;PTHLH                                                 | 3.62E-05          | 3.62E-05             | 0.212062           | -4.71561                     | T down vs N                            | 31.924  | 22.5277   | 11.2908    | 1         |
| cg01334209  | KRTAP9-2                                                    | 0.0002875         | 0.000287495          | 0.214864           | -4.6541                      | T down vs N                            | 21.287  | 22.1479   | 16.6471    | 1         |
| cg01337047  | DSG1                                                        | 1.45E-05          | 1.45E-05             | 0.189327           | -5.28186                     | T down vs N                            | 37.56   | 25.9426   | 11.0512    | 1         |
| cg01337940  | FAT1                                                        | 2.66E-06          | 2.66E-06             | 0.208965           | -4.78549                     | T down vs N                            | 49.969  | 22.9571   | 7.35086    | 1         |
| cg01338148  | KCND2                                                       | 9.31E-05          | 9.31E-05             | 0.117483           | -8.51188                     | T down vs N                            | 26.727  | 42.9519   | 25.7129    | 1         |
| cg01340550  | RNF11                                                       | 9.35E-05          | 9.35E-05             | 0.189588           | -5.27459                     | T down vs N                            | 26.704  | 25.8997   | 15.5178    | 1         |
| cg01341751  | THRA;NR1D1                                                  | 3.06E-06          | 3.06E-06             | 5.33616            | 5.33616                      | T up vs N                              | 48.821  | 26.2624   | 8.607      | 1         |
| cg01343097  | OR2M1P                                                      | 5.36E-05          | 5.36E-05             | 0.132822           | -7.5289                      | T down vs N                            | 29.683  | 38.1703   | 20.5748    | 1         |
| cg01343192  | OR5112                                                      | 0.00527469        | 0.00527469           | 0.297593           | -3.3603                      | T down vs N                            | 10.411  | 13.759    | 21.1459    | 1         |
| cg01346596  | C10orf47                                                    | 1.48E-05          | 1.48E-05             | 0.151058           | -6.61997                     | T down vs N                            | 37.46   | 33.4601   | 14.2917    | 1         |
| cg01347228  | RNF135;RNF135                                               | 0.00028915        | 0.000289146          | 7.1731             | 7.1731                       | T up vs N                              | 21.261  | 36.3616   | 27.3636    | 1         |
| cg01349621  | C20orf166                                                   | 0.00032438        | 0.000324384          | 0.274803           | -3.63897                     | T down vs N                            | 20.75   | 15.6273   | 12.0502    | 1         |
| cg01349901  | C9orf169                                                    | 1.00E-05          | 1.00E-05             | 0.260433           | -3.83975                     | T down vs N                            | 40.064  | 16.9539   | 6.77079    | 1         |
| cg01351783  | RREB1;RREB1;RREB1;RREB1                                     | 0.00066395        | 0.000663949          | 0.21336            | -4.68692                     | T down vs N                            | 17.727  | 22.3508   | 20.1731    | 1         |
| cg01352551  | SLC24A3                                                     | 7.99E-06          | 7.99E-06             | 0.333067           | -3.0024                      | T down vs N                            | 41.634  | 11.321    | 4.35065    | 1         |
| cg01353903  | PCDH19;PCDH19                                               | 0.00522865        | 0.00522865           | 4.02588            | 4.02588                      | T up vs N                              | 10.655  | 17.0992   | 24.0717    | 1         |
| cg01355753  | SEPHS2                                                      | 0.00348838        | 0.00348838           | 0.248055           | -4.03136                     | T down vs N                            | 11.715  | 18.2034   | 24.8608    | 1         |
| cg01357713  | PRKAG3                                                      | 6.12E-05          | 6.12E-05             | 0.316716           | -3.1574                      | T down vs N                            | 28.958  | 12.3814   | 6.84097    | 1         |
| cg01357846  | REG3G;REG3G                                                 | 0.00025709        | 0.000257093          | 0.240291           | -4.16162                     | T down vs N                            | 21.792  | 19.0433   | 13.982     | 1         |
| cg01359534  | AQP10                                                       | 2.29E-06          | 2.29E-06             | 0.246819           | -4.05155                     | T down vs N                            | 51.187  | 18.334    | 5.73089    | 1         |
| cg01360628  | EPHA3;EPHA3                                                 | 1.51E-05          | 1.51E-05             | 0.168706           | -5.92749                     | T down vs N                            | 37.309  | 29.6624   | 12.7209    | 1         |
| cg01365152  | CRP                                                         | 2.04E-06          | 2.04E-06             | 0.153941           | -6.49598                     | T down vs N                            | 52.157  | 32.794    | 10.0601    | 1         |
| cg01365766  | WWOX                                                        | 3.98E-05          | 3.98E-05             | 0.328644           | -3.04281                     | T down vs N                            | 31.369  | 11.5979   | 5.91558    | 1         |
| cg01368415  | MRPL11;MRPL11;MRPL11                                        | 0.00078547        | 0.000785471          | 0.313758           | -3.18717                     | T down vs N                            | 17.057  | 12.5843   | 11.8042    | 1         |
| cg01371233  | SEPHS2<br>PLEKHG4;PLEKHG4;PLEKHG4;PLEKHG4                   | 0.00040175        | 0.00040175           | 0.117856           | -8.4849                      | T down vs N                            | 19.818  | 42.8247   | 34.5747    | 1         |
| cg01378158  | ;PLEKHG4;PLEKHG4                                            | 1.78E-07          | 1.78E-07             | 0.189072           | -5.289                       | T down vs N                            | 76.071  | 25.9847   | 5.46534    | 1         |
| cg01378812  | DDX52;DDX52                                                 | 0.00012564        | 0.000125641          | 0.222893           | -4.48645                     | T down vs N                            | 25.203  | 21.1037   | 13.3978    | 1         |
| cg01381613  | PRM3                                                        | 1.03E-05          | 1.03E-05             | 0.227428           | -4.397                       | T down vs N                            | 39.898  | 20.5412   | 8.23747    | 1         |
| cg01382804  | SLC17A2                                                     | 0.00429424        | 0.00429424           | 0.321388           | -3.1115                      | T down vs N                            | 11.051  | 12.068    | 17.473     | 1         |
| cg01383287  | FBXO41                                                      | 0.00013611        | 0.000136108          | 4.40068            | 4.40068                      | T up vs N                              | 24.806  | 20.5645   | 13.2643    | 1         |
| cg01384290  | MECOM                                                       | 0.0050145         | 0.0050145            | 0.279549           | -3.57719                     | T down vs N                            | 10.567  | 15.2158   | 23.04      | 1         |
| cg01386314  | C17orf101;C17orf101                                         | 1.70E-05          | 1.70E-05             | 0.262754           | -3.80584                     | T down vs N                            | 36.538  | 16.7311   | 7.32649    | 1         |
| cg01387797  | UCN3                                                        | 8.29E-06          | 8.29E-06             | 0.239506           | -4.17526                     | T down vs N                            | 41.376  | 19.1308   | 7.39789    | 1         |
| cg01388054  | SUNC1;SUNC1                                                 | 0.00079586        | 0.000795856          | 0.318446           | -3.14025                     | T down vs N                            | 17.006  | 12.2643   | 11.539     | 1         |
| cg01392313  | C6orf227                                                    | 0.00015691        | 0.000156909          | 6.82758            | 6.82758                      | T up vs N                              | 24.111  | 34.5623   | 22.9359    | 1         |
| cg01394116  | RBM22                                                       | 4.36E-05          | 4.36E-05             | 0.188864           | -5.2948                      | T down vs N                            | 30.853  | 26.019    | 13.4931    | 1         |
| cg01397141  | MIR184                                                      | 1.15E-05          | 1.15E-05             | 0.306994           | -3.25739                     | T down vs N                            | 39.128  | 13.0619   | 5.34121    | 1         |
| cg01397912  | C19orf51;TNNI3                                              | 0.00106752        | 0.00106752           | 0.302032           | -3.3109                      | T down vs N                            | 15.872  | 13.4249   | 13.5335    | 1         |
| cg01399219  | AEBP1                                                       | 9.70E-06          | 9.70E-06             | 0.176286           | -5.67261                     | T down vs N                            | 40.277  | 28.2153   | 11.2084    | 1         |
| cg01400302  | ZNF311                                                      | 4.21E-05          | 4.21E-05             | 0.259597           | -3.85212                     | T down vs N                            | 31.049  | 17.0351   | 8.77843    | 1         |
| cg01401641  | TSHZ3                                                       | 1.37E-05          | 1.37E-05             | 0.212775           | -4.69979                     | T down vs N                            | 37.939  | 22.4302   | 9.45945    | 1         |
| cg01405004  | FAM19A4;FAM19A4                                             | 0.00036286        | 0.000362864          | 5.29699            | 5.29699                      | T up vs N                              | 20.258  | 26.0318   | 20.5601    | 1         |
| cg01406381  | SLC1A5;SLC1A5;SLC1A5<br>ARHGAP25;ARHGAP25;ARHGAP25;ARHGAP25 | 4.66E-05          | 4.66E-05             | 0.207929           | -4.80933                     | T down vs N                            | 30.468  | 23.1031   | 12.1322    | 1         |
| cg01407235  | HGAP25                                                      | 1.75E-07          | 1.75E-07             | 0.050076           | -19.9695                     | T down vs N                            | 76.227  | 83.9702   | 17.6254    | 1         |

| Probeset ID                                                      | UCSC_REFGENE_NAME           | p-value<br>(Type) | p-value (T vs.<br>N) | Ratio (T<br>vs. N) | Fold-<br>Change (T<br>vs. N) | Fold-Change (T vs.<br>N) (Description) | F(Type) | SS (Type) | SS (Error) | F (Error) |
|------------------------------------------------------------------|-----------------------------|-------------------|----------------------|--------------------|------------------------------|----------------------------------------|---------|-----------|------------|-----------|
| cg01409163                                                       | ERICH1                      | 0.00021744        | 0.000217438          | 0.327017           | -3.05794                     | T down vs N                            | 22.562  | 11.7016   | 8.29818    | 1         |
| cg01409448                                                       | MRPL4;MRPL4;MRPL4           | 8.54E-06          | 8.54E-06             | 0.201905           | -4.95282                     | T down vs N                            | 41.159  | 23.9761   | 9.32029    | 1         |
| cg01410314                                                       | C9orf41                     | 0.0057871         | 0.0057871            | 0.262834           | -3.80468                     | T down vs N                            | 10.128  | 16.7235   | 26.4193    | 1         |
| cg01410876                                                       | LMTK3                       | 2.71E-06          | 2.71E-06             | 4.01497            | 4.01497                      | T up vs N                              | 49.803  | 18.0971   | 5.81402    | 1         |
| cg01413492                                                       | SPACA5                      | 0.00391625        | 0.00391625           | 0.248336           | -4.0268                      | T down vs N                            | 11.343  | 18.1738   | 25.6352    | 1         |
| PCDHA6;PCDHA2;PCDHA1;PCDHA10;P<br>CDHA9;PCDHA7;PCDHA1;PCDHA6;PCD |                             |                   |                      |                    |                              |                                        |         |           |            |           |
| cg01416563                                                       | HA5;PCDHA3;PCDHA4;PCDHA10;P | 1.39E-05          | 1.39E-05             | 4.18507            | 4.18507                      | T up vs N                              | 37.874  | 19.1937   | 8.10836    | 1         |
| cg01416657                                                       | LEMD1                       | 2.37E-05          | 2.37E-05             | 0.232615           | -4.29895                     | T down vs N                            | 34.457  | 19.9204   | 9.24991    | 1         |
| cg01419582                                                       | TST                         | 0.00045995        | 0.000459945          | 0.31668            | -3.15776                     | T down vs N                            | 19.242  | 12.3838   | 10.2976    | 1         |
| cg01420564                                                       | OSBPL6                      | 0.00101111        | 0.00101111           | 0.285851           | -3.49833                     | T down vs N                            | 16.078  | 14.6882   | 14.6169    | 1         |
| cg01421902                                                       | ZNF665                      | 6.17E-05          | 6.17E-05             | 0.210511           | -4.75034                     | T down vs N                            | 28.914  | 22.7414   | 12.5843    | 1         |
| cg01421943                                                       | DKK2                        | 0.00411081        | 0.00411081           | 0.307288           | -3.25428                     | T down vs N                            | 11.189  | 13.0408   | 18.6485    | 1         |
| cg01422017                                                       | TSPAN16                     | 2.37E-07          | 2.37E-07             | 0.330309           | -3.02747                     | T down vs N                            | 72.836  | 11.4928   | 2.52464    | 1         |
| cg01422249                                                       | SEPT8;SEPT8;SEPT8;SEPT8     | 0.00037649        | 0.000376494          | 3.57856            | 3.57856                      | T up vs N                              | 20.098  | 15.2249   | 12.1206    | 1         |
| cg01422467                                                       | NHEDC2                      | 0.00651           | 0.00651              | 0.294198           | -3.39907                     | T down vs N                            | 9.7742  | 14.0207   | 22.9515    | 1         |
| cg01424901                                                       | RAP1GAP;RAP1GAP;RAP1GAP     | 5.03E-06          | 5.03E-06             | 3.24151            | 3.24151                      | T up vs N                              | 44.988  | 12.9541   | 4.6071     | 1         |
| cg01424997                                                       | NLRP13                      | 6.66E-06          | 6.66E-06             | 0.172367           | -5.80157                     | T down vs N                            | 42.927  | 28.951    | 10.7908    | 1         |
| cg01427575                                                       | SHANK1                      | 0.00018139        | 0.000181393          | 10.2578            | 10.2578                      | T up vs N                              | 23.414  | 50.7623   | 34.6879    | 1         |
| cg01430970                                                       | MYADML2                     | 0.00010252        | 0.000102523          | 0.187818           | -5.32431                     | T down vs N                            | 26.229  | 26.1928   | 15.9778    | 1         |
| cg01431057                                                       | S100A8                      | 6.72E-05          | 6.72E-05             | 0.294314           | -3.39773                     | T down vs N                            | 28.451  | 14.0117   | 7.87988    | 1         |
| cg01431992                                                       | TAOK3                       | 0.00111735        | 0.00111735           | 0.287639           | -3.47658                     | T down vs N                            | 15.699  | 14.5423   | 14.8208    | 1         |
| cg01433225                                                       | LCE2D                       | 2.49E-07          | 2.49E-07             | 0.273069           | -3.66208                     | T down vs N                            | 72.325  | 15.7809   | 3.49109    | 1         |
| cg01433297                                                       | SMOX;SMOX;SMOX;SMOX         | 0.00143934        | 0.00143934           | 0.320547           | -3.11966                     | T down vs N                            | 14.761  | 12.1237   | 13.1413    | 1         |
| cg01435178                                                       | C16orf11                    | 0.00092725        | 0.000927249          | 0.274853           | -3.63831                     | T down vs N                            | 16.41   | 15.623    | 15.2324    | 1         |
| cg01442426                                                       | XCR1;XCR1                   | 0.00025482        | 0.000254822          | 0.2211             | -4.52285                     | T down vs N                            | 21.832  | 21.3315   | 15.633     | 1         |
| cg01442889                                                       | PLCH2                       | 9.07E-07          | 9.07E-07             | 0.320537           | -3.11977                     | T down vs N                            | 59.289  | 12.1244   | 3.27196    | 1         |
| cg01443488                                                       | APCS                        | 1.26E-06          | 1.26E-06             | 0.093179           | -10.7321                     | T down vs N                            | 56.331  | 52.7526   | 14.9835    | 1         |
| cg01445659                                                       | MRPL34;ABHD8                | 5.30E-06          | 5.30E-06             | 0.258056           | -3.87513                     | T down vs N                            | 44.599  | 17.1858   | 6.1654     | 1         |
| cg01446287                                                       | ANKRD33B                    | 0.00337993        | 0.00337993           | 4.11265            | 4.11265                      | T up vs N                              | 11.818  | 18.7285   | 25.3557    | 1         |
| cg01446515                                                       | GJB6;GJB6;GJB6;GJB6         | 3.63E-05          | 3.63E-05             | 4.65739            | 4.65739                      | T up vs N                              | 31.909  | 22.1683   | 11.1158    | 1         |
| CD209;CD209;CD209;CD209;CD209;C                                  |                             |                   |                      |                    |                              |                                        |         |           |            |           |
| cg01452452                                                       | D209;CD209;CD209            | 0.00270318        | 0.00270318           | 0.266562           | -3.75147                     | T down vs N                            | 12.557  | 16.3728   | 20.8626    | 1         |
| cg01452549                                                       | ACSBG2                      | 0.00062853        | 0.000628525          | 0.317139           | -3.15319                     | T down vs N                            | 17.949  | 12.3526   | 11.0114    | 1         |
| cg01454519                                                       | CST5                        | 3.31E-05          | 3.31E-05             | 0.301729           | -3.31423                     | T down vs N                            | 32.444  | 13.4474   | 6.63169    | 1         |
| cg01456368                                                       | DNAH1                       | 5.96E-05          | 5.96E-05             | 5.58614            | 5.58614                      | T up vs N                              | 29.1    | 27.7181   | 15.2404    | 1         |
| cg01456571                                                       | TNFRSF10D                   | 0.00023723        | 0.00023723           | 22.5949            | 22.5949                      | T up vs N                              | 22.16   | 91.041    | 65.7349    | 1         |
| cg01459389                                                       | TAC4;TAC4;TAC4;TAC4;TAC4    | 7.82E-05          | 7.82E-05             | 0.293303           | -3.40944                     | T down vs N                            | 27.639  | 14.0906   | 8.15697    | 1         |
| cg01459807                                                       | LINGO3                      | 8.12E-05          | 8.12E-05             | 3.77457            | 3.77457                      | T up vs N                              | 27.439  | 16.5251   | 9.63599    | 1         |
| cg01459854                                                       | FLI43390                    | 0.00483233        | 0.00483233           | 0.31083            | -3.21719                     | T down vs N                            | 10.681  | 12.7887   | 19.1571    | 1         |
| cg01460436                                                       | SLC12A5;SLC12A5             | 0.00168512        | 0.00168512           | 5.31998            | 5.31998                      | T up vs N                              | 14.193  | 26.1673   | 29.4999    | 1         |
| cg01462353                                                       | DHRS9;DHRS9;DHRS9;DHRS9     | 5.81E-05          | 5.81E-05             | 0.157582           | -6.34591                     | T down vs N                            | 29.244  | 31.9799   | 17.4968    | 1         |
| cg01462607                                                       | NCRNA00085                  | 0.00019283        | 0.000192826          | 4.10757            | 4.10757                      | T up vs N                              | 23.125  | 18.6958   | 12.9355    | 1         |
| cg01462856                                                       | TNFSF13B;TNFSF13B           | 0.0004083         | 0.000408301          | 0.258227           | -3.87256                     | T down vs N                            | 19.748  | 17.169    | 13.9102    | 1         |
| cg01463139                                                       | OR10K1                      | 1.39E-05          | 1.39E-05             | 0.16115            | -6.20541                     | T down vs N                            | 37.846  | 31.2096   | 13.1944    | 1         |
| cg01463828                                                       | PDLIM2;PDLIM2;PDLIM2        | 7.98E-05          | 7.98E-05             | 4.18711            | 4.18711                      | T up vs N                              | 27.531  | 19.2068   | 11.1623    | 1         |
| cg01464104                                                       | ORST1                       | 8.89E-05          | 8.89E-05             | 0.242459           | -4.12441                     | T down vs N                            | 26.966  | 18.8041   | 11.1573    | 1         |
| cg01465527                                                       | SNORD32B                    | 0.00123165        | 0.00123165           | 0.229603           | -4.35535                     | T down vs N                            | 15.335  | 20.2781   | 21.1577    | 1         |
| cg01467266                                                       | JSRP1                       | 0.00091337        | 0.000913371          | 3.1668             | 3.1668                       | T up vs N                              | 16.468  | 12.4455   | 12.0915    | 1         |
| cg01467503                                                       | C1orf144;C1orf144           | 9.00E-08          | 9.00E-08             | 0.189495           | -5.27719                     | T down vs N                            | 84.144  | 25.915    | 4.92777    | 1         |
| cg01468514                                                       | ANKRD33B                    | 0.0001133         | 0.000113303          | 6.09636            | 6.09636                      | T up vs N                              | 25.721  | 30.6063   | 19.0388    | 1         |
| cg01471713                                                       | C1orf115                    | 0.00104258        | 0.00104258           | 5.14915            | 5.14915                      | T up vs N                              | 15.961  | 25.1554   | 25.2163    | 1         |
| cg01471923                                                       | SSTR4                       | 3.33E-05          | 3.33E-05             | 0.30999            | -3.22591                     | T down vs N                            | 32.408  | 12.848    | 6.34307    | 1         |
| cg01472299                                                       | CDYL                        | 5.58E-06          | 5.58E-06             | 4.12666            | 4.12666                      | T up vs N                              | 44.228  | 18.8187   | 6.80781    | 1         |
| cg01472882                                                       | ATOH8                       | 0.00056753        | 0.000567531          | 0.285671           | -3.50053                     | T down vs N                            | 18.366  | 14.7029   | 12.809     | 1         |
| cg01473602                                                       | CSRP2                       | 2.78E-05          | 2.78E-05             | 0.289137           | -3.45857                     | T down vs N                            | 33.497  | 14.4213   | 6.88845    | 1         |
| cg01474544                                                       | CDYL                        | 1.55E-05          | 1.55E-05             | 3.61325            | 3.61325                      | T up vs N                              | 37.129  | 15.4562   | 6.66064    | 1         |
| cg01474741                                                       | PSG2                        | 8.11E-06          | 8.11E-06             | 0.289963           | -3.44872                     | T down vs N                            | 41.528  | 14.355    | 5.53076    | 1         |
| cg01474781                                                       | AFF3;AFF3                   | 0.0004949         | 0.000494897          | 0.253628           | -3.94278                     | T down vs N                            | 18.934  | 17.6278   | 14.8965    | 1         |
| cg01476044                                                       | MGAM                        | 5.92E-06          | 5.92E-06             | 0.300099           | -3.33224                     | T down vs N                            | 43.794  | 13.5693   | 4.95755    | 1         |
| cg01476568                                                       | C10orf18                    | 0.00350778        | 0.00350778           | 0.306354           | -3.2642                      | T down vs N                            | 11.697  | 13.1082   | 17.9296    | 1         |
| cg01476678                                                       | UNC5A                       | 3.49E-05          | 3.49E-05             | 0.243301           | -4.11014                     | T down vs N                            | 32.135  | 18.7123   | 9.31677    | 1         |
| cg01477835                                                       | AFF1;AFF1                   | 8.31E-05          | 8.31E-05             | 0.293989           | -3.40149                     | T down vs N                            | 27.316  | 14.0373   | 8.22195    | 1         |
| cg01477959                                                       | TNFSF11                     | 5.66E-06          | 5.66E-06             | 0.189218           | -5.28492                     | T down vs N                            | 44.115  | 25.9607   | 9.41559    | 1         |
| cg01480180                                                       | FZD1;FZD1                   | 6.95E-06          | 6.95E-06             | 6.47944            | 6.47944                      | T up vs N                              | 42.625  | 32.7047   | 12.2764    | 1         |
| cg01480771                                                       | KLK4                        | 0.00011638        | 0.000116382          | 0.141286           | -7.07783                     | T down vs N                            | 25.586  | 35.8698   | 22.4309    | 1         |
| cg01481989                                                       | FRZB                        | 0.00165754        | 0.00165754           | 6.19879            | 6.19879                      | T up vs N                              | 14.252  | 31.1731   | 34.9978    | 1         |
| cg01483824                                                       | GRIN2D                      | 3.39E-06          | 3.39E-06             | 4.77479            | 4.77479                      | T up vs N                              | 48.017  | 22.8915   | 7.62774    | 1         |
| cg01484075                                                       | GLI2                        | 0.00031436        | 0.000314359          | 0.318799           | -3.13678                     | T down vs N                            | 20.889  | 12.2406   | 9.37592    | 1         |
| cg01485010                                                       | EPHA1                       | 0.0062734         | 0.0062734            | 3.31738            | 3.31738                      | T up vs N                              | 9.8849  | 13.4687   | 21.801     | 1         |
| cg01485549                                                       | FTO                         | 0.00105584        | 0.00105584           | 0.277754           | -3.60031                     | T down vs N                            | 15.913  | 15.37     | 15.4537    | 1         |

| Probeset ID | UCSC_REFGENE_NAME               | p-value<br>(Type) | p-value (T vs.<br>N) | Ratio (T<br>vs. N) | Fold-<br>Change (T<br>vs. N) | Fold-Change (T vs.<br>N) (Description) | F(Type) | SS (Type) | SS (Error) | F (Error) |
|-------------|---------------------------------|-------------------|----------------------|--------------------|------------------------------|----------------------------------------|---------|-----------|------------|-----------|
| cg01487803  | TM4SF5                          | 2.84E-06          | 2.84E-06             | 0.239527           | -4.17489                     | T down vs N                            | 49.436  | 19.1284   | 6.19093    | 1         |
| cg01492061  | DPCR1                           | 2.00E-05          | 2.00E-05             | 0.290543           | -3.44183                     | T down vs N                            | 35.512  | 14.3088   | 6.44689    | 1         |
| cg01492330  | KRT3                            | 4.32E-05          | 4.32E-05             | 18.1594            | 18.1594                      | T up vs N                              | 30.902  | 78.7252   | 40.7619    | 1         |
| cg01492656  | N4BP2;LOC344967                 | 0.00230008        | 0.00230008           | 0.284282           | -3.51763                     | T down vs N                            | 13.104  | 14.8175   | 18.0919    | 1         |
| cg01493678  | HLA-DOB                         | 0.00252532        | 0.00252532           | 0.266921           | -3.74643                     | T down vs N                            | 12.786  | 16.3395   | 20.4467    | 1         |
| cg01493728  | FGD6                            | 9.13E-06          | 9.13E-06             | 0.202302           | -4.9431                      | T down vs N                            | 40.7    | 23.9172   | 9.40235    | 1         |
| cg01495831  | ORSH15                          | 6.78E-06          | 6.78E-06             | 0.15939            | -6.2739                      | T down vs N                            | 42.797  | 31.5861   | 11.8087    | 1         |
| cg01496380  | C19orf21                        | 0.00306901        | 0.00306901           | 0.281344           | -3.55437                     | T down vs N                            | 12.134  | 15.0633   | 19.862     | 1         |
| cg01501896  | HSPB9;KAT2A                     | 3.84E-05          | 3.84E-05             | 3.52353            | 3.52353                      | T up vs N                              | 31.58   | 14.857    | 7.52738    | 1         |
| cg01502743  | CRTC1;CRTC1                     | 0.00059924        | 0.00059924           | 0.311964           | -3.20549                     | T down vs N                            | 18.143  | 12.7091   | 11.2079    | 1         |
| cg01503065  | DCHS2;DCHS2                     | 9.78E-05          | 9.78E-05             | 7.14404            | 7.14404                      | T up vs N                              | 26.47   | 36.212    | 21.8887    | 1         |
| cg01503218  | KPNA3                           | 0.00013036        | 0.00013036           | 0.314715           | -3.17748                     | T down vs N                            | 25.019  | 12.5182   | 8.0055     | 1         |
| cg01503299  | NOP14                           | 0.00152521        | 0.00152521           | 0.164122           | -6.09301                     | T down vs N                            | 14.551  | 30.5877   | 33.6342    | 1         |
| cg01505111  | HDHC2                           | 0.00020061        | 0.00020061           | 0.220017           | -4.54511                     | T down vs N                            | 22.939  | 21.4706   | 14.9761    | 1         |
| cg01505676  | TGM7                            | 5.55E-05          | 5.55E-05             | 0.26963            | -3.70879                     | T down vs N                            | 30.81   | 15.1441   | 7.37289    | 1         |
| cg01505767  | LOC284798;LOC284798;LOC284798   | 0.00010537        | 0.00010537           | 15.0298            | 15.0298                      | T up vs N                              | 26.089  | 68.7878   | 42.1861    | 1         |
| cg01506917  | TRERF1                          | 0.00015245        | 0.00015246           | 0.290002           | -3.44825                     | T down vs N                            | 24.251  | 14.3519   | 9.46906    | 1         |
| cg01507200  | OR6F1                           | 5.49E-05          | 5.49E-05             | 0.164157           | -6.09173                     | T down vs N                            | 29.557  | 30.5806   | 16.5543    | 1         |
| cg01508027  | ZNF224                          | 0.00017886        | 0.00017885           | 0.22504            | -4.44366                     | T down vs N                            | 23.482  | 20.8351   | 14.1968    | 1         |
| cg01509853  | FOKK1                           | 8.53E-07          | 8.53E-07             | 0.252565           | -3.95938                     | T down vs N                            | 59.86   | 17.7359   | 4.7406     | 1         |
| cg01510388  | CYP7B1                          | 0.00043671        | 0.00043671           | 4.09118            | 4.09118                      | T up vs N                              | 19.461  | 18.59     | 15.2838    | 1         |
| cg01511742  | FOX P1                          | 0.00086347        | 0.00086346           | 0.178043           | -5.61663                     | T down vs N                            | 16.686  | 27.8939   | 26.7464    | 1         |
| cg01514075  | VAMP3                           | 6.83E-05          | 6.83E-05             | 0.326051           | -3.06701                     | T down vs N                            | 28.36   | 11.7636   | 6.63685    | 1         |
| cg01514487  | MYO1A                           | 0.00012921        | 0.00012921           | 0.2822             | -3.54358                     | T down vs N                            | 25.063  | 14.9912   | 9.57024    | 1         |
| cg01515155  | ORSL1                           | 6.92E-06          | 6.92E-06             | 0.129904           | -7.698                       | T down vs N                            | 42.66   | 39.0149   | 14.6328    | 1         |
| cg01515802  | LAIR1;LAIR1                     | 0.00211402        | 0.00211402           | 0.062203           | -16.0765                     | T down vs N                            | 13.395  | 72.2478   | 86.2988    | 1         |
| cg01516737  | PPP2R2A                         | 0.00207854        | 0.00207854           | 4.12214            | 4.12214                      | T up vs N                              | 13.454  | 18.7896   | 22.3459    | 1         |
| cg01517033  | WFDC3;DNTTIP1                   | 8.83E-05          | 8.83E-05             | 0.290217           | -3.4457                      | T down vs N                            | 27.001  | 14.3348   | 8.49442    | 1         |
| cg01517776  | CD81                            | 0.00149022        | 0.00149022           | 0.313823           | -3.18651                     | T down vs N                            | 14.635  | 12.5798   | 13.7533    | 1         |
| cg01518723  | NFE2L1                          | 0.00185426        | 0.00185426           | 3.27072            | 3.27072                      | T up vs N                              | 13.853  | 13.1524   | 15.1907    | 1         |
| cg01518889  | GATA2;GATA2;GATA2               | 0.00065415        | 0.00065414           | 10.518             | 10.518                       | T up vs N                              | 17.787  | 51.8606   | 46.65      | 1         |
| cg01520122  | CCL7                            | 2.54E-05          | 2.54E-05             | 0.15835            | -6.31511                     | T down vs N                            | 34.036  | 31.8117   | 14.9542    | 1         |
| cg01521036  | FAM90A14;FAM90A13               | 0.00199684        | 0.00199684           | 0.202449           | -4.93953                     | T down vs N                            | 13.593  | 23.8956   | 28.1264    | 1         |
| cg01521258  | CACHD1                          | 9.45E-05          | 9.45E-05             | 0.24919            | -4.013                       | T down vs N                            | 26.646  | 18.0843   | 10.8589    | 1         |
| cg01524618  | UTRN                            | 2.16E-05          | 2.16E-05             | 0.270524           | -3.69653                     | T down vs N                            | 35.021  | 16.0094   | 7.31415    | 1         |
| cg01525538  | DUSP5P                          | 4.78E-06          | 4.78E-06             | 5.58236            | 5.58236                      | T up vs N                              | 45.373  | 27.6963   | 9.76656    | 1         |
| cg01528349  | PTPRB                           | 0.00043386        | 0.00043386           | 0.252856           | -3.95482                     | T down vs N                            | 19.489  | 17.7062   | 14.5364    | 1         |
| cg01531198  | SMOC1;SMOC1                     | 0.00074987        | 0.00074987           | 0.31572            | -3.16737                     | T down vs N                            | 17.241  | 12.4493   | 11.5534    | 1         |
| cg01531915  | RASGRP4;RASGRP4;RASGRP4;RASGRP4 | 0.00123293        | 0.00123293           | 0.296255           | -3.37547                     | T down vs N                            | 15.331  | 13.8615   | 14.4664    | 1         |
| cg01534390  | SLC7A7;SLC7A7;SLC7A7            | 0.00066944        | 0.00066944           | 0.268369           | -3.72621                     | T down vs N                            | 17.694  | 16.2059   | 14.6543    | 1         |
| cg01534572  | CBFA2T3                         | 0.00211174        | 0.00211174           | 0.325089           | -3.07608                     | T down vs N                            | 13.399  | 11.8257   | 14.1217    | 1         |
| cg01535726  | MSRA;MSRA                       | 6.76E-06          | 6.76E-06             | 0.324862           | -3.07823                     | T down vs N                            | 42.825  | 11.8405   | 4.42375    | 1         |
| cg01536682  | EARS2;EARS2;UBFD1               | 8.11E-05          | 8.11E-05             | 0.187709           | -5.32739                     | T down vs N                            | 27.443  | 26.2109   | 15.2815    | 1         |
| cg01538392  | TP53INP2                        | 7.38E-06          | 7.38E-06             | 0.288655           | -3.46434                     | T down vs N                            | 42.195  | 14.46     | 5.4832     | 1         |
| cg01538575  | RFX2;RFX2                       | 4.25E-05          | 4.25E-05             | 0.311072           | -3.21469                     | T down vs N                            | 31      | 12.7716   | 6.59187    | 1         |
| cg01538969  | DHX16;DHX16                     | 6.16E-05          | 6.16E-05             | 0.237352           | -4.21314                     | T down vs N                            | 28.923  | 19.3734   | 10.7171    | 1         |
| cg01542719  | DHX36;DHX36                     | 0.00010416        | 0.00010416           | 0.267646           | -3.73628                     | T down vs N                            | 26.148  | 16.2724   | 9.95707    | 1         |
| cg01543184  | MAFG;MAFG                       | 2.38E-05          | 2.38E-05             | 7.2778             | 7.2778                       | T up vs N                              | 34.435  | 36.8984   | 17.1444    | 1         |
| cg01546430  | ITK                             | 2.18E-08          | 2.18E-08             | 0.164045           | -6.09587                     | T down vs N                            | 103.36  | 30.6036   | 4.73753    | 1         |
| cg01547809  | TUSC2                           | 0.00032809        | 0.00032809           | 0.291627           | -3.42903                     | T down vs N                            | 20.7    | 14.2226   | 10.9936    | 1         |
| cg01552920  | MYADML2                         | 0.00123574        | 0.00123574           | 0.219184           | -4.56238                     | T down vs N                            | 15.323  | 21.5782   | 22.5324    | 1         |
| cg01554410  | IRX6                            | 0.00104262        | 0.00104262           | 4.23546            | 4.23546                      | T up vs N                              | 15.961  | 19.516    | 19.5635    | 1         |
| cg01555907  | NDUFB6;NDUFB6                   | 2.36E-05          | 2.36E-05             | 0.184437           | -5.4219                      | T down vs N                            | 34.478  | 26.7648   | 12.4206    | 1         |
| cg01556075  | C19orf59                        | 7.23E-07          | 7.23E-07             | 0.131137           | -7.62561                     | T down vs N                            | 61.422  | 38.6545   | 10.0692    | 1         |
| cg01556706  | FHIT;FHIT                       | 0.00012243        | 0.00012242           | 0.149789           | -6.67605                     | T down vs N                            | 25.332  | 33.7594   | 21.3229    | 1         |
| cg01556846  | ANGPT2;ANGPT2;ANGPT2;MCPH1      | 1.19E-05          | 1.19E-05             | 0.187583           | -5.33097                     | T down vs N                            | 38.91   | 26.2319   | 10.7867    | 1         |
| cg01557798  | OBSCN;OBSCN                     | 0.00507429        | 0.00507429           | 3.90515            | 3.90515                      | T up vs N                              | 10.53   | 17.3822   | 26.4119    | 1         |
| cg01560554  | NLRP7;NLRP7;NLRP7               | 0.00018114        | 0.00018113           | 0.159281           | -6.27822                     | T down vs N                            | 23.421  | 31.6097   | 21.5939    | 1         |
| cg01561259  | RPTOR;RPTOR                     | 0.00083858        | 0.00083857           | 0.1171             | -8.53972                     | T down vs N                            | 16.801  | 43.083    | 41.0301    | 1         |
| cg01561304  | COL23A1                         | 0.0006967         | 0.00069669           | 0.180024           | -5.55482                     | T down vs N                            | 17.534  | 27.5372   | 25.1283    | 1         |
| cg01561916  | HAAO                            | 3.61E-05          | 3.61E-05             | 5.76325            | 5.76325                      | T up vs N                              | 31.944  | 28.7331   | 14.3917    | 1         |
| cg01562897  | MYCBP;GJA9                      | 0.00174423        | 0.00174423           | 0.292171           | -3.42265                     | T down vs N                            | 14.07   | 14.1796   | 16.125     | 1         |
| cg01563071  | CPNE4                           | 4.53E-05          | 4.53E-05             | 0.24033            | -4.16095                     | T down vs N                            | 30.627  | 19.039    | 9.9462     | 1         |
| cg01566342  | NMUR2                           | 0.0040516         | 0.0040516            | 0.281859           | -3.54787                     | T down vs N                            | 11.235  | 15.0199   | 21.3906    | 1         |
| cg01567509  | KIAA1026;KIAA1026               | 2.68E-05          | 2.68E-05             | 0.18096            | -5.52609                     | T down vs N                            | 33.717  | 27.3709   | 12.9885    | 1         |
| cg01567825  | DOCK4                           | 2.43E-06          | 2.43E-06             | 3.7618             | 3.7618                       | T up vs N                              | 50.691  | 16.4409   | 5.18939    | 1         |
| cg01568522  | GALNT6                          | 6.16E-05          | 6.16E-05             | 4.64601            | 4.64601                      | T up vs N                              | 28.922  | 22.0978   | 12.2249    | 1         |
| cg01568668  | LOC283731;ISLR2;ISLR2           | 0.00046987        | 0.00046987           | 0.331392           | -3.01757                     | T down vs N                            | 19.151  | 11.425    | 9.54496    | 1         |
| cg01568919  | FZD10                           | 0.00054566        | 0.00054566           | 5.81978            | 5.81978                      | T up vs N                              | 18.528  | 29.0543   | 25.0905    | 1         |

| Probeset ID                 | UCSC_REFGENE_NAME                  | p-value<br>(Type) | p-value (T vs.<br>N) | Ratio (T<br>vs. N) | Fold-<br>Change (T<br>vs. N) | Fold-Change (T vs.<br>N) (Description) | F(Type) | SS (Type) | SS (Error) | F (Error) |
|-----------------------------|------------------------------------|-------------------|----------------------|--------------------|------------------------------|----------------------------------------|---------|-----------|------------|-----------|
| cg01569500                  | GRIN1;GRIN1;GRIN1                  | 0.00380342        | 0.00380342           | 6.00757            | 6.00757                      | T up vs N                              | 11.437  | 30.1115   | 42.1265    | 1         |
| cg01570480                  | CAPN1                              | 1.14E-05          | 1.14E-05             | 3.27456            | 3.27456                      | T up vs N                              | 39.174  | 13.1785   | 5.38253    | 1         |
| cg01570885                  | FAM50B                             | 0.00124018        | 0.00124018           | 4.13973            | 4.13973                      | T up vs N                              | 15.309  | 18.9027   | 19.7557    | 1         |
| cg01571977                  | SPPL2B;SPPL2B                      | 9.55E-05          | 9.55E-05             | 3.01582            | 3.01582                      | T up vs N                              | 26.594  | 11.413    | 6.86641    | 1         |
| cg01573121                  | DNAJC28;DNAJC28                    | 0.00411133        | 0.00411133           | 0.309859           | -3.22727                     | T down vs N                            | 11.188  | 12.8572   | 18.3867    | 1         |
| cg01573635                  | TEKT5;TEKT5                        | 5.15E-05          | 5.15E-05             | 0.303263           | -3.29746                     | T down vs N                            | 29.908  | 13.3338   | 7.1333     | 1         |
| cg01573747                  | CPAMD8                             | 0.00018803        | 0.000188033          | 7.21974            | 7.21974                      | T up vs N                              | 23.244  | 36.6012   | 25.1947    | 1         |
| cg01573949                  | SCAMP3;SCAMP3                      | 1.36E-05          | 1.36E-05             | 0.214457           | -4.66293                     | T down vs N                            | 37.978  | 22.2025   | 9.3538     | 1         |
| cg01574571                  | IL12RB1;IL12RB1                    | 2.99E-06          | 2.99E-06             | 0.182611           | -5.47611                     | T down vs N                            | 49.003  | 27.0808   | 8.84217    | 1         |
| cg01576340                  | CTNNBIP1;CTNNBIP1                  | 0.00506673        | 0.00506673           | 4.85054            | 4.85054                      | T up vs N                              | 11.327  | 18.6838   | 21.4433    | 1         |
| cg01576450                  | ADAM20                             | 0.0021157         | 0.0021157            | 0.272708           | -3.66692                     | T down vs N                            | 13.392  | 15.8131   | 18.8923    | 1         |
| PAX8;PAX8;PAX8;PAX8;LOC4408 |                                    |                   |                      |                    |                              |                                        |         |           |            |           |
| cg01577475                  | 39                                 | 0.00648956        | 0.00648956           | 6.48676            | 6.48676                      | T up vs N                              | 9.7836  | 32.7442   | 53.5498    | 1         |
| cg01577992                  | DPY19L2P2;DPY19L2P2                | 1.90E-05          | 1.90E-05             | 4.09061            | 4.09061                      | T up vs N                              | 35.824  | 18.5864   | 8.30122    | 1         |
| cg01578764                  | CYP2W1                             | 7.82E-06          | 7.82E-06             | 0.285692           | -3.50027                     | T down vs N                            | 41.779  | 14.7012   | 5.63011    | 1         |
| cg01579765                  | HSF2BP                             | 0.00042907        | 0.000429067          | 0.211086           | -4.7374                      | T down vs N                            | 19.536  | 22.6619   | 18.5598    | 1         |
| cg01584457                  | GRK7                               | 4.51E-07          | 4.51E-07             | 0.263628           | -3.79322                     | T down vs N                            | 66.073  | 16.648    | 4.03139    | 1         |
| cg01584932                  | TTC31;TTC31;CCDC142                | 3.91E-05          | 3.91E-05             | 0.248107           | -4.03052                     | T down vs N                            | 31.48   | 18.1979   | 9.24923    | 1         |
| cg01585096                  | KRTDAP                             | 6.78E-05          | 6.78E-05             | 0.312721           | -3.19773                     | T down vs N                            | 28.398  | 12.6562   | 7.13069    | 1         |
| cg01585852                  | MIF                                | 0.00123231        | 0.00123231           | 0.301073           | 3.32145                      | T down vs N                            | 15.333  | 13.4963   | 14.0836    | 1         |
| cg01587682                  | PAX6;PAX6;PAX6                     | 0.00055083        | 0.000550828          | 3.71426            | 3.71426                      | T up vs N                              | 18.489  | 16.1268   | 13.956     | 1         |
| cg01589580                  | CTDP1;CTDP1                        | 3.87E-07          | 3.87E-07             | 0.157502           | -6.34912                     | T down vs N                            | 67.622  | 31.9974   | 7.57089    | 1         |
| cg01589860                  | ARAP1;ARAP1;ARAP1                  | 0.00010032        | 0.00010032           | 0.20765            | -4.8158                      | T down vs N                            | 26.341  | 23.1426   | 14.0575    | 1         |
| cg01590848                  | DLL3;DLL3                          | 0.00025172        | 0.000251722          | 3.72663            | 3.72663                      | T up vs N                              | 21.888  | 16.2086   | 11.8484    | 1         |
| cg01592369                  | ZNF26                              | 2.40E-06          | 2.40E-06             | 0.271784           | -3.6794                      | T down vs N                            | 50.792  | 15.8958   | 5.00738    | 1         |
|                             |                                    |                   |                      |                    |                              |                                        |         |           |            |           |
| cg01594685                  | IL32;IL32;IL32;IL32;IL32;IL32;IL32 | 5.23E-05          | 5.23E-05             | 0.297795           | -3.35801                     | T down vs N                            | 29.819  | 13.7436   | 7.37431    | 1         |
| cg01595325                  | HS3ST4                             | 0.00010295        | 0.000102948          | 0.179532           | -5.57004                     | T down vs N                            | 26.208  | 27.6252   | 16.8651    | 1         |
| cg01595397                  | MED20;BYSL                         | 1.24E-06          | 1.24E-06             | 0.133427           | -7.49473                     | T down vs N                            | 56.428  | 37.9985   | 10.7744    | 1         |
| cg01595717                  | EHMT1;EHMT1                        | 0.00016546        | 0.000165456          | 0.285632           | -3.501                       | T down vs N                            | 23.854  | 14.7061   | 9.86393    | 1         |
| cg01596963                  | LRRN4CL                            | 0.00042444        | 0.00042444           | 4.19306            | 4.19306                      | T up vs N                              | 19.583  | 19.2449   | 15.7241    | 1         |
| cg01597480                  | C7orf58;C7orf58                    | 1.30E-05          | 1.30E-05             | 0.177185           | -5.64383                     | T down vs N                            | 38.302  | 28.0502   | 11.7176    | 1         |
| cg01597727                  | MYH7B;MIR499                       | 0.00033934        | 0.000339335          | 0.288879           | -3.46166                     | T down vs N                            | 20.551  | 14.442    | 11.2438    | 1         |
| cg01598160                  | KRTAP12-4;C21orf29                 | 2.78E-05          | 2.78E-05             | 0.175422           | -5.70055                     | T down vs N                            | 33.494  | 28.3753   | 13.555     | 1         |
| cg01600123                  | DLG3;DLG3;DLG3                     | 0.00346152        | 0.00346152           | 8.95343            | 8.95343                      | T up vs N                              | 11.741  | 45.0046   | 61.3325    | 1         |
| cg01602621                  | ACP5;ACP5;ACP5;ACP5                | 5.89E-06          | 5.89E-06             | 9.85444            | 9.85444                      | T up vs N                              | 43.831  | 49.028    | 17.8972    | 1         |
| cg01603559                  | SHISA7                             | 0.00014547        | 0.000145471          | 3.05265            | 3.05265                      | T up vs N                              | 24.479  | 11.6653   | 7.62471    | 1         |
| cg01604946                  | SH3TC2                             | 1.92E-06          | 1.92E-06             | 0.213561           | -4.68251                     | T down vs N                            | 52.651  | 22.3235   | 6.78385    | 1         |
| cg01605921                  | SCAND3                             | 0.00018536        | 0.000185362          | 0.247898           | -4.03392                     | T down vs N                            | 23.312  | 18.2199   | 12.5053    | 1         |
| cg01606773                  | CD109;CD109;CD109                  | 0.00019539        | 0.00019539           | 0.229105           | -4.36482                     | T down vs N                            | 23.063  | 20.3379   | 14.1098    | 1         |
| PRR5;PRR5;PRR5;PRR5-        |                                    |                   |                      |                    |                              |                                        |         |           |            |           |
| cg01608788                  | ARHGAP8;PRR5;PRR5                  | 0.00698641        | 0.00698641           | 0.251339           | -3.97869                     | T down vs N                            | 9.5646  | 17.8616   | 29.8796    | 1         |
| cg01609214                  | MIR30D                             | 0.00085399        | 0.000853988          | 0.20743            | -4.82091                     | T down vs N                            | 16.73   | 23.1738   | 22.1634    | 1         |
| cg01611223                  | PPM1G;PPM1G                        | 0.00102104        | 0.00102104           | 0.241022           | -4.149                       | T down vs N                            | 16.041  | 18.9623   | 18.9141    | 1         |
| cg01611622                  | SBSN;SBSN;SBSN                     | 0.00044387        | 0.000443868          | 0.211736           | -4.72287                     | T down vs N                            | 19.392  | 22.5724   | 18.624     | 1         |
| cg01612095                  | CYBA                               | 2.15E-06          | 2.15E-06             | 0.2233             | -4.47828                     | T down vs N                            | 51.723  | 21.0525   | 6.51239    | 1         |
| cg01612158                  | FCRL4                              | 0.00072367        | 0.000723665          | 0.288625           | -3.46471                     | T down vs N                            | 17.382  | 14.4625   | 13.3125    | 1         |
| cg01612247                  | HSD17B1                            | 0.00011842        | 0.000118418          | 0.213068           | -4.69334                     | T down vs N                            | 25.499  | 22.3904   | 14.0495    | 1         |
| cg01614738                  | CCT5                               | 8.41E-07          | 8.41E-07             | 0.106274           | -9.40962                     | T down vs N                            | 59.992  | 47.0684   | 12.5533    | 1         |
| cg01615704                  | MALL;MALL                          | 0.00028338        | 0.000283379          | 12.6263            | 12.6263                      | T up vs N                              | 21.352  | 60.2261   | 45.1308    | 1         |
| cg01615815                  | MIR54814;CNTNAP2                   | 0.00033803        | 0.000338032          | 0.251964           | -3.96883                     | T down vs N                            | 20.568  | 17.7974   | 13.8446    | 1         |
| cg01618151                  | C6orf81                            | 1.62E-05          | 1.62E-05             | 0.256505           | -3.98855                     | T down vs N                            | 36.846  | 17.3391   | 7.52938    | 1         |
| cg01619045                  | ZNF100                             | 0.0021317         | 0.0021317            | 0.284023           | -3.52084                     | T down vs N                            | 13.366  | 14.839    | 17.7632    | 1         |
| cg01623475                  | WWOX                               | 3.39E-05          | 3.39E-05             | 0.240677           | -4.15494                     | T down vs N                            | 32.299  | 19.0004   | 9.4122     | 1         |
| cg01628425                  | EPHA8;EPHA8                        | 2.05E-05          | 2.05E-05             | 0.245791           | -4.06849                     | T down vs N                            | 35.351  | 18.4436   | 8.34764    | 1         |
| cg01630032                  | WWOX                               | 0.00035495        | 0.000354952          | 0.322505           | -3.10072                     | T down vs N                            | 20.354  | 11.9943   | 9.42845    | 1         |
|                             |                                    |                   |                      |                    |                              |                                        |         |           |            |           |
| cg01631497                  | NRP2;NRP2;NRP2;NRP2;NRP2;NRP2      | 0.00119575        | 0.00119575           | 0.309974           | -3.22608                     | T down vs N                            | 15.445  | 12.8491   | 13.3108    | 1         |
| cg01637175                  | KCNJ12                             | 0.00010135        | 0.000101353          | 14.2244            | 14.2244                      | T up vs N                              | 26.288  | 66.0202   | 40.1828    | 1         |
| cg01637244                  | OXSM;OXSM;OXSM                     | 1.95E-05          | 1.95E-05             | 0.175514           | -5.69756                     | T down vs N                            | 35.663  | 28.3582   | 12.7227    | 1         |
| cg01637482                  | FAHD1;FAHD1                        | 0.00022695        | 0.000226953          | 0.243643           | -4.10437                     | T down vs N                            | 22.364  | 18.6751   | 13.361     | 1         |
| cg01638185                  | PRKCA                              | 4.70E-05          | 4.70E-05             | 0.203226           | -4.92063                     | T down vs N                            | 30.422  | 23.781    | 12.5075    | 1         |
| cg01640150                  | VCPIP1                             | 2.22E-05          | 2.22E-05             | 0.208363           | -4.79932                     | T down vs N                            | 34.877  | 23.0418   | 10.5705    | 1         |
| cg01641792                  | PDE4A;PDE4A;PDE4A;PDE4A            | 0.00372775        | 0.00372775           | 16.5233            | 16.5233                      | T up vs N                              | 11.501  | 73.6812   | 102.503    | 1         |
| cg01642901                  | SH3RF1                             | 0.00047359        | 0.000473586          | 0.319883           | -3.12614                     | T down vs N                            | 19.118  | 12.168    | 10.1833    | 1         |
| cg01645295                  | DIDO1;DIDO1;DIDO1                  | 0.00082246        | 0.000822462          | 4.5086             | 4.5086                       | T up vs N                              | 16.877  | 21.2424   | 20.1392    | 1         |
| cg01645836                  | CXorf59                            | 1.75E-05          | 1.75E-05             | 0.205372           | -4.8692                      | T down vs N                            | 36.367  | 23.4685   | 10.3252    | 1         |
| cg01649334                  | NFKBIZ                             | 3.26E-06          | 3.26E-06             | 0.15598            | -6.41106                     | T down vs N                            | 48.317  | 32.3344   | 10.7073    | 1         |
| cg01649611                  | THADA;THADA                        | 5.73E-05          | 5.73E-05             | 0.186535           | -5.36093                     | T down vs N                            | 29.322  | 26.4079   | 14.41      | 1         |
| cg01650776                  | ACCN3;ACCN3;ACCN3                  | 0.0016946         | 0.0016946            | 3.02305            | 3.02305                      | T up vs N                              | 14.173  | 11.4625   | 12.9406    | 1         |
| cg01650818                  | APBA2;APBA2                        | 0.00644792        | 0.00644792           | 0.200863           | -4.97851                     | T down vs N                            | 9.8028  | 24.1314   | 39.387     | 1         |
| cg01651570                  | ZFYVE21                            | 0.0034275         | 0.0034275            | 3.03989            | 3.03989                      | T up vs N                              | 11.773  | 11.578    | 15.7355    | 1         |

| Probeset ID | UCSC_REFGENE_NAME           | p-value<br>(Type) | p-value (T vs.<br>N) | Ratio (T<br>vs. N) | Fold-<br>Change (T<br>vs. N) | Fold-Change (T vs.<br>N) (Description) | F(Type) | SS (Type) | SS (Error) | F (Error) |
|-------------|-----------------------------|-------------------|----------------------|--------------------|------------------------------|----------------------------------------|---------|-----------|------------|-----------|
| cg01656620  | FAM101A                     | 0.00032496        | 0.000324957          | 0.2456             | -4.07167                     | T down vs N                            | 20.742  | 18.4641   | 14.243     | 1         |
| cg01657744  | LDB3;LDB3;LDB3              | 0.00328957        | 0.00328957           | 0.179392           | -5.57439                     | T down vs N                            | 11.907  | 27.6503   | 37.1567    | 1         |
| cg01657995  | C6orf48;C6orf48;SNORD52     | 7.46E-06          | 7.46E-06             | 0.227783           | -4.39015                     | T down vs N                            | 42.114  | 20.498    | 7.78763    | 1         |
| cg01660934  | ESRP2                       | 0.00037186        | 0.000371864          | 4.34829            | 4.34829                      | T up vs N                              | 20.152  | 20.2333   | 16.0649    | 1         |
| cg01660999  | ANGPT1                      | 0.00070324        | 0.000703239          | 0.281328           | -3.55458                     | T down vs N                            | 17.496  | 15.0647   | 13.7763    | 1         |
| cg01662876  | GALNTL5;GALNTL5             | 0.00019975        | 0.000199753          | 0.240122           | -4.16456                     | T down vs N                            | 22.959  | 19.0621   | 13.2845    | 1         |
| cg01663407  | AFTPH;AFTPH;AFTPH           | 0.00080548        | 0.000805477          | 0.234875           | -4.25758                     | T down vs N                            | 16.958  | 19.6571   | 18.5462    | 1         |
| cg01663603  | KCNB1                       | 0.00015029        | 0.000150286          | 22.4177            | 22.4177                      | T up vs N                              | 24.32   | 90.5818   | 59.5932    | 1         |
| cg01665555  | PAX6;PAX6;PAX6              | 0.00026334        | 0.000263344          | 5.33876            | 5.33876                      | T up vs N                              | 21.683  | 26.2777   | 19.3907    | 1         |
| cg01667384  | FLT3LG                      | 0.00038826        | 0.000388258          | 0.29948            | -3.33912                     | T down vs N                            | 19.965  | 13.6159   | 10.9118    | 1         |
| cg01669948  | KCNK16;KCNK16;KCNK16;KCNK16 | 5.35E-05          | 5.35E-05             | 0.312783           | -3.19711                     | T down vs N                            | 29.696  | 12.652    | 6.81686    | 1         |
| cg01671642  | USP50;USP50                 | 2.77E-05          | 2.77E-05             | 0.173633           | -5.75928                     | T down vs N                            | 33.507  | 28.7105   | 13.7096    | 1         |
| cg01671881  | C20orf71;C20orf71           | 6.83E-05          | 6.83E-05             | 0.256594           | -3.89721                     | T down vs N                            | 28.361  | 17.3303   | 9.77712    | 1         |
| cg01677310  | SIN3B                       | 0.00306697        | 0.00306697           | 0.291088           | -3.43539                     | T down vs N                            | 12.137  | 14.2654   | 18.8065    | 1         |
| cg01677623  | ARHGAP22                    | 6.73E-05          | 6.73E-05             | 3.02085            | 3.02085                      | T up vs N                              | 28.441  | 11.4475   | 6.43993    | 1         |
| cg01678580  | MGRN1;MGRN1;MGRN1;MGRN1     | 0.00643907        | 0.00643907           | 0.27141            | -3.05678                     | T down vs N                            | 9.8069  | 11.6937   | 19.0783    | 1         |
| cg01682111  | UNKL                        | 1.55E-05          | 1.55E-05             | 9.77701            | 9.77701                      | T up vs N                              | 39.08   | 45.8263   | 17.5893    | 1         |
| cg01684579  | NOP16                       | 1.76E-05          | 1.76E-05             | 0.260265           | -3.84224                     | T down vs N                            | 36.323  | 16.9702   | 7.47531    | 1         |
| cg01685893  | BCO2;BCO2                   | 3.01E-05          | 3.01E-05             | 0.324896           | -3.07791                     | T down vs N                            | 33.015  | 11.8382   | 5.73713    | 1         |
| cg01686093  | SHANK2;SHANK2               | 0.00176302        | 0.00176302           | 0.332006           | -3.012                       | T down vs N                            | 14.032  | 11.3868   | 12.9841    | 1         |
| cg01687040  | DCD                         | 1.68E-06          | 1.68E-06             | 0.16431            | -6.08607                     | T down vs N                            | 53.767  | 30.5491   | 9.0908     | 1         |
| cg01689796  | PRAMEF4                     | 6.31E-05          | 6.31E-05             | 0.249277           | -4.0116                      | T down vs N                            | 28.786  | 18.0753   | 10.0467    | 1         |
| cg01690872  | PLXNA4;PLXNA4;PLXNA4        | 6.86E-06          | 6.86E-06             | 0.303916           | -3.29038                     | T down vs N                            | 42.718  | 13.2858   | 4.97621    | 1         |
| cg01692252  | GRB7                        | 7.51E-07          | 7.51E-07             | 0.187412           | -5.33584                     | T down vs N                            | 61.065  | 26.2606   | 6.88075    | 1         |
| cg01692842  | ACAD8                       | 0.00048119        | 0.000481189          | 0.231135           | -4.32647                     | T down vs N                            | 19.051  | 20.0951   | 16.8766    | 1         |
| cg01695279  | BTBD1;BTBD1                 | 0.00016854        | 0.000168541          | 0.251611           | -3.97439                     | T down vs N                            | 23.766  | 17.8336   | 12.0063    | 1         |
| cg01699298  | CBLN4                       | 0.00316937        | 0.00316937           | 0.296072           | -3.37756                     | T down vs N                            | 12.028  | 13.8756   | 18.4571    | 1         |
| cg01700462  | C20orf123                   | 0.00019112        | 0.00019112           | 0.227872           | -4.38843                     | T down vs N                            | 23.167  | 20.4871   | 14.1493    | 1         |
| cg01702501  | RGMA;RGMA                   | 0.00077248        | 0.000772481          | 0.286096           | -3.49533                     | T down vs N                            | 17.123  | 14.6681   | 13.706     | 1         |
| cg01703997  | OR10G2                      | 0.00014935        | 0.000149348          | 0.144279           | -6.93101                     | T down vs N                            | 24.351  | 35.1055   | 23.0667    | 1         |
| cg01704698  | CRISPLD2                    | 0.00020775        | 0.000207748          | 0.312067           | -3.20444                     | T down vs N                            | 22.775  | 12.7019   | 8.92353    | 1         |
| cg01704957  | YBX2                        | 0.00105407        | 0.00105407           | 6.02396            | 6.02396                      | T up vs N                              | 15.92   | 30.203    | 30.3554    | 1         |
| cg01705811  | ADAD2;ADAD2                 | 5.39E-06          | 5.39E-06             | 0.231665           | -4.31657                     | T down vs N                            | 44.476  | 20.0323   | 7.20658    | 1         |
| cg01708091  | SCAND3                      | 4.68E-05          | 4.68E-05             | 0.193916           | -5.15687                     | T down vs N                            | 30.445  | 25.2013   | 13.2444    | 1         |
| cg01708377  | GMD5                        | 0.00059104        | 0.000591036          | 0.295642           | -3.38247                     | T down vs N                            | 18.199  | 13.9087   | 12.2279    | 1         |
| cg01708552  | C7orf52                     | 7.18E-05          | 7.18E-05             | 4.69893            | 4.69893                      | T up vs N                              | 28.09   | 22.4249   | 12.7732    | 1         |
| cg01710147  | PFKFB2;PFKFB2               | 0.00012903        | 0.000129028          | 0.223425           | -4.47577                     | T down vs N                            | 25.07   | 21.0367   | 13.4258    | 1         |
| cg01710361  | TTC39A;TTC39A               | 4.02E-05          | 4.02E-05             | 0.233298           | -4.28637                     | T down vs N                            | 31.319  | 19.8404   | 10.1358    | 1         |
| cg01712258  | ODF2L;ODF2L                 | 0.00513814        | 0.00513814           | 0.265817           | -3.76199                     | T down vs N                            | 10.491  | 16.4422   | 25.0753    | 1         |
| cg01714342  | RIPK3                       | 0.00181505        | 0.00181505           | 0.302951           | -3.30086                     | T down vs N                            | 13.929  | 13.3569   | 15.3432    | 1         |
| cg01715172  | ESR1;ESR1;ESR1;ESR1         | 0.00417071        | 0.00417071           | 0.300192           | -3.33121                     | T down vs N                            | 11.143  | 13.5623   | 19.4741    | 1         |
| cg01716224  | FAM83F                      | 2.31E-05          | 2.31E-05             | 4.1218             | 4.1218                       | T up vs N                              | 34.619  | 18.7873   | 8.68303    | 1         |
| cg01717047  | LOC643955                   | 5.72E-05          | 5.72E-05             | 0.197261           | -5.06942                     | T down vs N                            | 29.329  | 24.6786   | 13.463     | 1         |
| cg01718736  | LSM5;LSM5;LSM5;LSM5         | 7.28E-05          | 7.28E-05             | 0.25944            | -3.85445                     | T down vs N                            | 28.021  | 17.0503   | 9.73579    | 1         |
| cg01721149  | C1orf61                     | 0.00083968        | 0.000839678          | 0.195769           | -5.10807                     | T down vs N                            | 16.795  | 24.9101   | 23.7303    | 1         |
| cg01723706  | LOC285419                   | 1.89E-06          | 1.89E-06             | 0.163442           | -6.11837                     | T down vs N                            | 52.798  | 30.7284   | 9.31201    | 1         |
| cg01724456  | FAM12B                      | 0.00155429        | 0.00155429           | 0.23334            | -4.2856                      | T down vs N                            | 14.483  | 19.8355   | 21.9138    | 1         |
| cg01725130  | RIN3                        | 3.69E-05          | 3.69E-05             | 0.254939           | -3.92251                     | T down vs N                            | 31.805  | 17.4956   | 8.80142    | 1         |
| cg01725531  | TNFRSF10A                   | 0.00015062        | 0.000150615          | 8.55786            | 8.55786                      | T up vs N                              | 24.309  | 43.1683   | 28.4126    | 1         |
| cg01726767  | LALBA                       | 0.00016777        | 0.000167772          | 0.309027           | -3.23597                     | T down vs N                            | 23.788  | 12.9164   | 8.68781    | 1         |
| cg01728482  | TCF7L1                      | 0.00267557        | 0.00267557           | 0.267557           | -3.73753                     | T down vs N                            | 12.591  | 16.2807   | 20.6885    | 1         |
| cg01728830  | TMPRSS4;TMPRSS4             | 5.25E-05          | 5.25E-05             | 0.186948           | -5.34907                     | T down vs N                            | 29.806  | 26.3383   | 14.1384    | 1         |
| cg01729116  | CDH15                       | 5.41E-06          | 5.41E-06             | 0.078323           | -12.7677                     | T down vs N                            | 44.446  | 60.7564   | 21.8715    | 1         |
| cg01730177  | CXorf15;CXorf15             | 0.0008362         | 0.000836198          | 0.262182           | -3.81415                     | T down vs N                            | 16.812  | 16.7857   | 15.9753    | 1         |
| cg01731685  | IL17RA                      | 3.04E-07          | 3.04E-07             | 0.320415           | -3.12095                     | T down vs N                            | 70.153  | 12.1325   | 2.7671     | 1         |
| cg01733284  | OR10K2                      | 2.71E-07          | 2.71E-07             | 0.065001           | -15.3845                     | T down vs N                            | 71.384  | 69.9769   | 15.6846    | 1         |
| cg01734062  | TMEM92;TMEM92;TMEM92        | 2.06E-05          | 2.06E-05             | 4.80166            | 4.80166                      | T up vs N                              | 35.324  | 23.0561   | 10.4432    | 1         |
| cg01734628  | RDBP;SKIV2L;MIR1236         | 5.70E-05          | 5.70E-05             | 0.19431            | -5.14642                     | T down vs N                            | 29.346  | 25.1391   | 13.7065    | 1         |
| cg01735398  | SLC5A10;FAM83G;SLC5A10      | 5.98E-05          | 5.98E-05             | 6.1413             | 6.1413                       | T up vs N                              | 29.082  | 30.8555   | 16.9757    | 1         |
| cg01737554  | SLFN12L                     | 0.00112065        | 0.00112065           | 0.29593            | -3.37918                     | T down vs N                            | 15.688  | 13.8866   | 14.1626    | 1         |
| cg01738095  | ASXL2                       | 0.0004998         | 0.000499801          | 0.312195           | -3.20312                     | T down vs N                            | 18.892  | 12.6929   | 10.7497    | 1         |
| cg01742357  | RAPGEF4;RAPGEF4             | 0.00311045        | 0.00311045           | 0.332514           | -3.00739                     | T down vs N                            | 12.09   | 11.3552   | 15.0273    | 1         |
| cg01743846  | PSMB7                       | 0.00019077        | 0.000190766          | 0.18208            | -5.4921                      | T down vs N                            | 23.176  | 27.1737   | 18.7603    | 1         |
| cg01744331  | KCNQ10T1;KCNQ1;KCNQ1        | 0.00010824        | 0.000108239          | 0.148796           | -6.72062                     | T down vs N                            | 25.953  | 33.9965   | 20.959     | 1         |
| cg01746044  | ASCC2                       | 6.11E-05          | 6.11E-05             | 0.26753            | -3.7379                      | T down vs N                            | 28.967  | 16.2831   | 8.99396    | 1         |
| cg01746241  | KIAA1161                    | 0.00022219        | 0.000222186          | 4.18866            | 4.18866                      | T up vs N                              | 22.462  | 19.2167   | 13.6883    | 1         |
| cg01747591  | DPEP1;DPEP1                 | 0.00035445        | 0.000354449          | 0.241668           | -4.1379                      | T down vs N                            | 20.36   | 18.8909   | 14.8452    | 1         |
| cg01747969  | DLX6AS                      | 0.00275581        | 0.00275581           | 3.45467            | 3.45467                      | T up vs N                              | 12.492  | 14.395    | 18.4374    | 1         |
| cg01748268  | TRIM10;TRIM10               | 1.99E-05          | 1.99E-05             | 0.231987           | -4.31059                     | T down vs N                            | 35.543  | 19.9943   | 9.00069    | 1         |
| cg01748414  | MYLK4                       | 1.81E-05          | 1.81E-05             | 0.218942           | -4.56742                     | T down vs N                            | 36.163  | 21.6096   | 9.56107    | 1         |
| cg01748892  | HoxA5                       | 0.0007807         | 0.000780702          | 7.03017            | 7.03017                      | T up vs N                              | 17.081  | 35.6225   | 33.3673    | 1         |
| cg01749213  | CCDC108;CCDC108             | 0.00013175        | 0.000131749          | 0.272191           | -3.67389                     | T down vs N                            | 24.967  | 15.8593   | 10.1635    | 1         |

| Probeset ID | UCSC_REFGENE_NAME                   | p-value<br>(Type) | p-value (T vs.<br>N) | Ratio (T<br>vs. N) | Fold-<br>Change (T<br>vs. N) | Fold-Change (T vs.<br>N) (Description) | F(Type) | SS (Type) | SS (Error) | F (Error) |
|-------------|-------------------------------------|-------------------|----------------------|--------------------|------------------------------|----------------------------------------|---------|-----------|------------|-----------|
| cg01749702  | C20orf202                           | 0.00066438        | 0.000664383          | 0.186422           | -5.36418                     | T down vs N                            | 17.725  | 26.427    | 23.8557    | 1         |
| cg01750716  | SGCZ                                | 0.0011885         | 0.0011885            | 0.331407           | -3.01744                     | T down vs N                            | 15.468  | 11.424    | 11.8172    | 1         |
| cg01750724  | DLGAP2                              | 0.00085024        | 0.000850239          | 0.25076            | -3.98787                     | T down vs N                            | 16.747  | 17.9212   | 17.1222    | 1         |
| cg01751134  | LPCAT2                              | 0.00671653        | 0.00671653           | 37.6781            | 37.6781                      | T up vs N                              | 9.6812  | 123.354   | 203.865    | 1         |
| cg01751245  | SPRED2;SPRED2;SPRED2                | 0.00113331        | 0.00113331           | 0.216113           | -4.6272                      | T down vs N                            | 15.646  | 21.9812   | 22.4787    | 1         |
| cg01753198  | SF3B3                               | 0.00037626        | 0.000376264          | 0.274703           | -3.6403                      | T down vs N                            | 20.101  | 15.6362   | 12.4463    | 1         |
| cg01754713  | TRIM72                              | 0.0002942         | 0.000294196          | 5.20401            | 5.20401                      | T up vs N                              | 21.184  | 25.4817   | 19.2462    | 1         |
| cg01755009  | OR14A16                             | 4.34E-06          | 4.34E-06             | 1.20851            | -8.27464                     | T down vs N                            | 46.108  | 41.8255   | 14.514     | 1         |
| cg01755224  | MID1;MID1;MID1                      | 0.00050403        | 0.000504034          | 0.258709           | -3.86534                     | T down vs N                            | 18.857  | 17.1217   | 14.5275    | 1         |
| cg01755551  | ZNF782                              | 7.12E-05          | 7.12E-05             | 0.265594           | -3.76514                     | T down vs N                            | 28.137  | 16.463    | 9.36153    | 1         |
| cg01756700  | RNF19A                              | 5.53E-05          | 5.53E-05             | 0.246671           | -4.05399                     | T down vs N                            | 29.517  | 18.3498   | 9.94689    | 1         |
| cg01756799  | COASY;COASY;COASY;COASY;COASY       | 8.43E-06          | 8.43E-06             | 0.31391            | -3.18563                     | T down vs N                            | 41.257  | 12.5738   | 4.87624    | 1         |
| cg01759672  | GFRA3                               | 0.00017682        | 0.000176818          | 3.44827            | 3.44827                      | T up vs N                              | 23.536  | 14.352    | 9.7566     | 1         |
| cg01760103  | GALNTL5;GALNTL5                     | 0.00027917        | 0.00027917           | 0.252259           | -3.96418                     | T down vs N                            | 21.419  | 17.7671   | 13.2721    | 1         |
| cg01763090  | OTUD7A                              | 0.00060859        | 0.000608592          | 3.49519            | 3.49519                      | T up vs N                              | 18.08   | 14.6671   | 12.9798    | 1         |
| cg01765174  | TRIM14;TRIM14;TRIM14;TRIM14         | 1.98E-08          | 1.98E-08             | 0.157166           | -6.36272                     | T down vs N                            | 104.84  | 32.0715   | 4.8947     | 1         |
| cg01772980  | SCGB1D1                             | 0.00368473        | 0.00368473           | 0.313519           | -3.1896                      | T down vs N                            | 11.539  | 12.6009   | 17.4732    | 1         |
| cg01776045  | TG                                  | 0.00188764        | 0.00188764           | 0.257577           | -3.88234                     | T down vs N                            | 13.79   | 17.233    | 19.9943    | 1         |
| cg01778994  | ST3GAL1;ST3GAL1                     | 0.00158706        | 0.00158706           | 0.303516           | -3.29472                     | T down vs N                            | 14.407  | 13.3152   | 14.7871    | 1         |
| cg01779740  | GPR20                               | 6.07E-05          | 6.07E-05             | 0.309502           | -3.231                       | T down vs N                            | 28.999  | 12.8826   | 7.1078     | 1         |
| cg01780009  | B3GNTL1                             | 0.00027134        | 0.000271341          | 0.298418           | -3.35101                     | T down vs N                            | 21.547  | 13.6963   | 10.1702    | 1         |
| cg01781119  | GRIP1                               | 0.00017663        | 0.000176627          | 0.252048           | -3.96749                     | T down vs N                            | 23.541  | 17.7887   | 12.0902    | 1         |
| cg01783730  | PRKAR1B;PRKAR1B;PRKAR1B;PRKAR1B     | 0.00014763        | 0.000147628          | 3.57271            | 3.57271                      | T up vs N                              | 24.407  | 15.1859   | 9.95507    | 1         |
| cg01784548  | RAC1;RAC1                           | 0.0025353         | 0.0025353            | 4.16092            | 4.16092                      | T up vs N                              | 12.773  | 19.0388   | 23.8495    | 1         |
| cg01786715  | HSPA2;HSPA2                         | 0.00118435        | 0.00118435           | 11.9985            | 11.9985                      | T up vs N                              | 15.481  | 57.8281   | 59.7676    | 1         |
| cg01787382  | MECOM                               | 0.00413463        | 0.00413463           | 0.268064           | -3.73045                     | T down vs N                            | 11.17   | 16.2339   | 23.2528    | 1         |
| cg01789499  | PRDM8                               | 1.66E-05          | 1.66E-05             | 8.69646            | 8.69646                      | T up vs N                              | 36.696  | 43.8168   | 19.1048    | 1         |
| cg01790530  | NAT8B                               | 3.33E-06          | 3.33E-06             | 0.184331           | -5.42503                     | T down vs N                            | 48.153  | 26.7831   | 8.89927    | 1         |
| cg01791648  | SENP7;SENP7                         | 0.00214097        | 0.00214097           | 0.245085           | -4.08021                     | T down vs N                            | 13.351  | 18.5193   | 22.1937    | 1         |
| cg01792749  | SCN10A                              | 6.30E-07          | 6.30E-07             | 0.164295           | -6.08659                     | T down vs N                            | 62.748  | 30.552    | 7.79039    | 1         |
| cg01793704  | MEST                                | 8.37E-06          | 8.37E-06             | 18.064             | 18.064                       | T up vs N                              | 41.306  | 78.4396   | 30.384     | 1         |
| cg01794802  | PSORS1C1                            | 5.97E-06          | 5.97E-06             | 0.150485           | -6.64516                     | T down vs N                            | 43.728  | 33.5947   | 12.2922    | 1         |
| cg01796223  | CPA4;CPA4;CPA4;CPA4                 | 0.00139929        | 0.00139929           | 0.260921           | -3.83257                     | T down vs N                            | 14.864  | 16.9068   | 18.1987    | 1         |
| cg01796225  | CHORDC1;CHORDC1                     | 6.06E-06          | 6.06E-06             | 0.15198            | -6.57982                     | T down vs N                            | 43.621  | 33.2451   | 12.1941    | 1         |
| cg01796228  | LIFR                                | 6.52E-06          | 6.52E-06             | 0.220776           | -4.52947                     | T down vs N                            | 43.079  | 21.3729   | 7.93805    | 1         |
| cg01796493  | EYS                                 | 0.00160931        | 0.00160931           | 0.32037            | -3.12139                     | T down vs N                            | 14.357  | 12.1355   | 13.524     | 1         |
| cg01796929  | RDH16                               | 0.00023956        | 0.000239555          | 0.239901           | -4.16838                     | T down vs N                            | 22.115  | 19.0867   | 13.8092    | 1         |
| cg01798266  | PGLYRP4                             | 8.02E-05          | 8.02E-05             | 0.281441           | -3.55315                     | T down vs N                            | 27.505  | 15.0552   | 8.75774    | 1         |
| cg01799653  | ANKRD33B                            | 0.00118703        | 0.00118703           | 8.09557            | 8.09557                      | T up vs N                              | 15.472  | 40.9639   | 42.3609    | 1         |
| cg01799856  | STARD3;STARD3;STARD3                | 2.59E-06          | 2.59E-06             | 0.281357           | -3.55421                     | T down vs N                            | 50.173  | 15.0623   | 4.80328    | 1         |
| cg01799930  | KIAA1751                            | 8.21E-06          | 8.21E-06             | 0.1259             | -7.9428                      | T down vs N                            | 41.439  | 40.221    | 15.5298    | 1         |
| cg01800061  | MIR519B;MIR526B                     | 0.00308954        | 0.00308954           | 0.270992           | -3.69015                     | T down vs N                            | 12.112  | 15.9671   | 21.0919    | 1         |
| cg01801101  | AMZ1                                | 3.53E-06          | 3.53E-06             | 0.298847           | -3.34619                     | T down vs N                            | 47.697  | 13.6637   | 4.58346    | 1         |
| cg01802545  | LGMN;LGMN                           | 0.00013321        | 0.000133209          | 0.307823           | -3.24862                     | T down vs N                            | 24.912  | 13.0023   | 8.35082    | 1         |
| cg01802898  | TMEM82                              | 2.02E-05          | 2.02E-05             | 0.261933           | -3.81777                     | T down vs N                            | 35.464  | 16.8095   | 7.58374    | 1         |
| cg01802953  | SERPINC1                            | 0.00277714        | 0.00277714           | 0.302856           | -3.3019                      | T down vs N                            | 12.466  | 13.3639   | 17.1521    | 1         |
| cg01803766  | NTM                                 | 3.30E-05          | 3.30E-05             | 4.92327            | 4.92327                      | T up vs N                              | 32.458  | 23.7971   | 11.7308    | 1         |
| cg01804278  | MACROD1                             | 0.00061315        | 0.000613152          | 0.325467           | -3.07251                     | T down vs N                            | 18.05   | 11.8013   | 10.4613    | 1         |
| cg01806442  | LASP1                               | 0.00068775        | 0.000687745          | 3.82028            | 3.82028                      | T up vs N                              | 17.586  | 16.826    | 15.3089    | 1         |
| cg01806857  | COL11A2;COL11A2;COL11A2;COL11A2     | 0.00045668        | 0.000456675          | 0.218608           | -4.5744                      | T down vs N                            | 19.272  | 21.6531   | 17.9772    | 1         |
| cg01807649  | LAIR2;LAIR2                         | 0.00014854        | 0.000148538          | 0.301795           | -3.31351                     | T down vs N                            | 25.332  | 12.6518   | 7.49154    | 1         |
| cg01807820  | SCNN1A;SCNN1A;SCNN1A                | 1.96E-05          | 1.96E-05             | 15.0195            | 15.0195                      | T up vs N                              | 35.633  | 68.7529   | 30.872     | 1         |
| cg01807825  | GK2;GK2                             | 2.11E-07          | 2.11E-07             | 0.248578           | -4.02289                     | T down vs N                            | 74.117  | 18.1485   | 3.91783    | 1         |
| cg01808492  | KIAA0040;KIAA0040;KIAA0040;KIAA0040 | 0.00399762        | 0.00399762           | 4.55498            | 4.55498                      | T up vs N                              | 11.278  | 21.5321   | 30.5488    | 1         |
| cg01808739  | FNBP1L;FNBP1L;FNBP1L                | 0.00185243        | 0.00185243           | 0.266442           | -3.75316                     | T down vs N                            | 13.857  | 16.3839   | 18.9181    | 1         |
| cg01808879  | LOC100128191;TMPO;TMPO;TMPO         | 0.000689          | 0.000689001          | 0.209055           | -4.78343                     | T down vs N                            | 17.578  | 22.9444   | 20.8843    | 1         |
| cg01809639  | RCSD1                               | 1.69E-06          | 1.69E-06             | 0.318291           | -3.14178                     | T down vs N                            | 53.73   | 12.2748   | 3.65528    | 1         |
| cg01809927  | LGALS8;LGALS8;LGALS8;LGALS8         | 2.62E-05          | 2.62E-05             | 0.25096            | -3.9847                      | T down vs N                            | 33.844  | 17.9006   | 8.46264    | 1         |
| cg01812045  | DES                                 | 5.58E-05          | 5.58E-05             | 4.41662            | 4.41662                      | T up vs N                              | 29.46   | 20.6649   | 11.2233    | 1         |
| cg01812146  | ARHGAP29                            | 0.00020677        | 0.000206766          | 0.303024           | -3.30006                     | T down vs N                            | 22.797  | 13.3514   | 9.37072    | 1         |
| cg01812894  | ALDH1A1                             | 5.32E-06          | 5.32E-06             | 0.212632           | -4.70295                     | T down vs N                            | 44.572  | 22.4497   | 8.05882    | 1         |
| cg01815263  | EDEM1                               | 3.18E-05          | 3.18E-05             | 0.291336           | -3.43246                     | T down vs N                            | 32.676  | 14.2457   | 6.97548    | 1         |
| cg01815536  | TSHB                                | 7.72E-06          | 7.72E-06             | 0.251228           | -3.98044                     | T down vs N                            | 41.877  | 17.873    | 6.82882    | 1         |
| cg01816482  | OPA1;OPA1;OPA1;OPA1;OPA1;OPA1       | 0.00434985        | 0.00434985           | 0.210081           | -4.76007                     | T down vs N                            | 11.01   | 22.8012   | 33.1351    | 1         |
| cg01817521  | SLC17A9;SLC17A9                     | 0.00019829        | 0.000198286          | 5.32015            | 5.32015                      | T up vs N                              | 22.993  | 26.1683   | 18.2093    | 1         |
| cg01820962  | NTSDC1                              | 8.29E-06          | 8.29E-06             | 0.144227           | -6.93352                     | T down vs N                            | 41.375  | 35.1186   | 13.5805    | 1         |

| Probeset ID                                                 | UCSC_REFGENE_NAME             | p-value<br>(Type) | p-value (T vs.<br>N) | Ratio (T<br>vs. N) | Fold-<br>Change (T<br>vs. N) | Fold-Change (T vs.<br>N) (Description) | F(Type) | SS (Type) | SS (Error) | F (Error) |
|-------------------------------------------------------------|-------------------------------|-------------------|----------------------|--------------------|------------------------------|----------------------------------------|---------|-----------|------------|-----------|
| cg01824138                                                  | CASZ1                         | 0.00279221        | 0.00279221           | 3.04639            | 3.04639                      | T up vs N                              | 12.448  | 11.6225   | 14.9387    | 1         |
| cg01824625                                                  | EPHA3;EPHA3                   | 1.84E-06          | 1.84E-06             | 0.246742           | -4.05281                     | T down vs N                            | 53.007  | 18.3422   | 5.5366     | 1         |
| cg01826093                                                  | LRRN2;LRRN2                   | 8.65E-05          | 8.65E-05             | 0.289636           | -3.45261                     | T down vs N                            | 27.109  | 14.3812   | 8.48788    | 1         |
| cg01826574                                                  | DMRT1                         | 0.00154092        | 0.00154092           | 6.31229            | 6.31229                      | T up vs N                              | 14.514  | 31.7963   | 35.0524    | 1         |
| cg01827818                                                  | CCDC60                        | 1.47E-06          | 1.47E-06             | 0.276581           | -3.61557                     | T down vs N                            | 54.931  | 15.4717   | 4.50652    | 1         |
| cg01828474                                                  | KLHL34                        | 0.00172793        | 0.00172793           | 27.0386            | 27.0386                      | T up vs N                              | 14.103  | 101.829   | 115.525    | 1         |
| cg01829926                                                  | ERI1                          | 8.08E-05          | 8.08E-05             | 0.296384           | -3.37401                     | T down vs N                            | 27.463  | 13.8516   | 8.06996    | 1         |
| cg01830883                                                  | WDR8                          | 0.00014621        | 0.000146213          | 0.280616           | -3.56358                     | T down vs N                            | 24.454  | 15.1249   | 9.89604    | 1         |
| cg01831657                                                  | COL23A1                       | 0.00156127        | 0.00156127           | 0.299013           | -3.34434                     | T down vs N                            | 14.466  | 13.6512   | 15.0984    | 1         |
| cg01832012                                                  | TPK1;TPK1                     | 0.00271086        | 0.00271086           | 0.301533           | -3.31639                     | T down vs N                            | 12.547  | 13.462    | 17.1667    | 1         |
| cg01832325                                                  | HBBP1                         | 3.16E-05          | 3.16E-05             | 0.133163           | -7.50958                     | T down vs N                            | 32.713  | 38.0733   | 18.6215    | 1         |
| cg01833222                                                  | LAMB2                         | 0.00131701        | 0.00131701           | 0.320258           | -3.12248                     | T down vs N                            | 15.087  | 12.143    | 12.8781    | 1         |
| cg01833234                                                  | DNHD1                         | 0.00032933        | 0.000329332          | 3.7795             | 3.7795                       | T up vs N                              | 20.683  | 16.5577   | 12.8088    | 1         |
| cg01833675                                                  | FAM124B;FAM124B               | 0.00197222        | 0.00197222           | 0.317269           | -3.1519                      | T down vs N                            | 13.637  | 12.3438   | 14.4831    | 1         |
| cg01834160                                                  | MTSS1L                        | 0.00020212        | 0.00020212           | 4.75261            | 4.75261                      | T up vs N                              | 22.903  | 22.7553   | 15.8966    | 1         |
| cg01834878                                                  | OR8U8;OR5M8                   | 6.52E-07          | 6.52E-07             | 0.178143           | -5.61346                     | T down vs N                            | 62.417  | 27.756    | 17.4566    | 1         |
| cg01835021                                                  | MSH5;MSH5;C6orf26;MSH5;MSH5   | 2.38E-06          | 2.38E-06             | 0.255369           | -3.91591                     | T down vs N                            | 50.854  | 17.4525   | 5.49098    | 1         |
| cg01835384                                                  | TMEM30B;TMEM30B               | 0.00016181        | 0.000161806          | 0.218019           | -4.58675                     | T down vs N                            | 23.962  | 21.73     | 14.5097    | 1         |
| cg01835506                                                  | GYPC;GYPC                     | 0.00012089        | 0.000120891          | 0.257214           | -3.88782                     | T down vs N                            | 25.395  | 17.2689   | 10.8801    | 1         |
| cg01837657                                                  | RHCG                          | 5.53E-05          | 5.53E-05             | 10.0835            | 10.0835                      | T up vs N                              | 29.513  | 50.0178   | 27.1164    | 1         |
| cg01839954                                                  | WDR25;WDR25                   | 3.83E-05          | 3.83E-05             | 0.146352           | -6.83285                     | T down vs N                            | 31.596  | 34.5901   | 17.5165    | 1         |
| cg01840333                                                  | HIST1H3E                      | 1.73E-05          | 1.73E-05             | 6.83727            | 6.83727                      | T up vs N                              | 38.325  | 32.5773   | 12.7503    | 1         |
| cg01841050                                                  | KRT34                         | 0.00025818        | 0.000258179          | 0.191947           | -5.20978                     | T down vs N                            | 21.773  | 25.516    | 18.7509    | 1         |
| cg01842807                                                  | CYP2W1                        | 0.00016567        | 0.000165669          | 0.295173           | -3.38784                     | T down vs N                            | 23.848  | 13.945    | 9.35585    | 1         |
| cg01842890                                                  | HCG18;HCG18                   | 0.00167922        | 0.00167922           | 0.120793           | -8.27863                     | T down vs N                            | 14.205  | 41.8446   | 47.1321    | 1         |
| cg01844274                                                  | SYNE1;SYNE1                   | 8.05E-05          | 8.05E-05             | 0.234932           | -4.25655                     | T down vs N                            | 27.486  | 19.6505   | 11.439     | 1         |
| cg01844642                                                  | GPR62                         | 1.49E-05          | 1.49E-05             | 5.90122            | 5.90122                      | T up vs N                              | 37.409  | 29.5146   | 12.6234    | 1         |
| cg01849065                                                  | DEFB104B;DEFB104A             | 1.17E-05          | 1.17E-05             | 0.214172           | -4.66914                     | T down vs N                            | 39.029  | 22.2409   | 9.11769    | 1         |
| cg01849401                                                  | NOTCH4                        | 0.00136701        | 0.00136701           | 0.332306           | -3.00927                     | T down vs N                            | 14.95   | 11.3681   | 12.1668    | 1         |
| cg01850269                                                  | SIM1                          | 0.00046879        | 0.000468791          | 3.47048            | 3.47048                      | T up vs N                              | 19.161  | 14.5013   | 12.1089    | 1         |
| cg01851632                                                  | AAMP                          | 0.00328406        | 0.00328406           | 0.32085            | -3.11672                     | T down vs N                            | 11.912  | 12.1036   | 16.2575    | 1         |
| cg01852648                                                  | MKL2                          | 0.00217417        | 0.00217417           | 0.316914           | -3.15543                     | T down vs N                            | 13.298  | 12.3679   | 14.8811    | 1         |
| cg01856640                                                  | RENBP                         | 1.10E-06          | 1.10E-06             | 0.238423           | -4.19423                     | T down vs N                            | 57.497  | 19.2524   | 5.35749    | 1         |
| cg01856645                                                  | DMGDH;BHMT2                   | 0.00138374        | 0.00138374           | 7.73923            | 7.73923                      | T up vs N                              | 14.905  | 39.2194   | 42.1006    | 1         |
| cg01861613                                                  | RNF182;RNF182;RNF182;RNF182   | 0.00080997        | 0.000809971          | 0.195101           | -5.12555                     | T down vs N                            | 16.937  | 25.0145   | 23.6313    | 1         |
| cg01862363                                                  | NTN1                          | 2.64E-05          | 2.64E-05             | 0.122835           | -8.14097                     | T down vs N                            | 33.804  | 41.1833   | 19.4926    | 1         |
| cg01862418                                                  | CRIP1                         | 0.00583482        | 0.00583482           | 4.5342             | 4.5342                       | T up vs N                              | 10.103  | 21.4024   | 33.8942    | 1         |
| cg01863510                                                  | C17orf90;CCDC137              | 0.00039308        | 0.000393075          | 0.274156           | -3.64756                     | T down vs N                            | 19.912  | 15.6845   | 12.6032    | 1         |
| cg01864980                                                  | PAH                           | 0.00023671        | 0.000236714          | 5.26693            | 5.26693                      | T up vs N                              | 22.17   | 25.8544   | 18.6594    | 1         |
| cg01867395                                                  | PAX6                          | 0.00481844        | 0.00481844           | 5.91808            | 5.91808                      | T up vs N                              | 10.69   | 29.6095   | 44.317     | 1         |
| cg01871907                                                  | GNG7                          | 0.00293884        | 0.00293884           | 3.09735            | 3.09735                      | T up vs N                              | 12.278  | 11.9713   | 15.6006    | 1         |
| cg01872872                                                  | C11orf64                      | 3.64E-05          | 3.64E-05             | 0.311407           | -3.21123                     | T down vs N                            | 31.881  | 12.7481   | 6.39791    | 1         |
| cg01874863                                                  | SGCZ                          | 2.50E-05          | 2.50E-05             | 3.403              | 3.403                        | T up vs N                              | 34.143  | 14.0472   | 6.58284    | 1         |
| cg01874867                                                  | PON1                          | 2.56E-05          | 2.56E-05             | 3.98513            | 3.98513                      | T up vs N                              | 33.976  | 17.9034   | 8.43109    | 1         |
| cg01875052                                                  | JARID2                        | 8.56E-05          | 8.56E-05             | 0.296111           | -3.37711                     | T down vs N                            | 27.16   | 13.8726   | 8.17231    | 1         |
| cg01876619                                                  | ECE2;ECE2                     | 0.00046075        | 0.00046075           | 0.300605           | -3.32663                     | T down vs N                            | 19.234  | 13.5314   | 11.2561    | 1         |
| cg01878825                                                  | SSX5;SSX5                     | 0.00013346        | 0.000133456          | 0.285594           | -3.50148                     | T down vs N                            | 24.903  | 14.7093   | 9.45063    | 1         |
| cg01880149                                                  | FLG                           | 0.00126576        | 0.00126576           | 0.296868           | -3.3685                      | T down vs N                            | 15.233  | 13.8145   | 14.5097    | 1         |
| cg01881136                                                  | ANKRD11                       | 6.05E-05          | 6.05E-05             | 5.72067            | 5.72067                      | T up vs N                              | 29.019  | 28.4903   | 15.7085    | 1         |
| cg01881778                                                  | OR8S1                         | 0.00025344        | 0.000253438          | 0.20727            | -4.82464                     | T down vs N                            | 21.857  | 23.1966   | 16.9806    | 1         |
| cg01882880                                                  | HOXB2                         | 0.00063397        | 0.000633972          | 3.57801            | 3.57801                      | T up vs N                              | 17.914  | 15.2213   | 13.5951    | 1         |
| cg01882933                                                  | BTNL9                         | 0.00115501        | 0.00115501           | 0.306431           | -3.26338                     | T down vs N                            | 15.575  | 13.1026   | 13.4604    | 1         |
| cg01883408                                                  | CCNI2                         | 1.45E-05          | 1.45E-05             | 3.13765            | 3.13765                      | T up vs N                              | 37.565  | 12.2466   | 5.21617    | 1         |
| cg01884549                                                  | MAP1LC3B2                     | 9.91E-06          | 9.91E-06             | 0.138959           | -7.19638                     | T down vs N                            | 40.128  | 36.4813   | 14.5459    | 1         |
| cg01885356                                                  | ARMC9                         | 0.00077919        | 0.000779185          | 0.331164           | -3.01965                     | T down vs N                            | 17.089  | 11.4392   | 10.7102    | 1         |
| cg01885503                                                  | IRX3                          | 0.00011475        | 0.000114754          | 10.5614            | 10.5614                      | T up vs N                              | 25.657  | 52.0421   | 32.4541    | 1         |
| cg01886524                                                  | LOC90246                      | 0.0014162         | 0.0014162            | 0.246474           | -4.05722                     | T down vs N                            | 14.82   | 18.3707   | 19.8331    | 1         |
| cg01886663                                                  | RPTOR;RPTOR                   | 1.12E-05          | 1.12E-05             | 0.222915           | -4.48602                     | T down vs N                            | 39.296  | 21.101    | 8.59153    | 1         |
| SNORD115-19;SNORD115-17;SNORD115-18;SNORD115-17;SNORD115-18 |                               |                   |                      |                    |                              |                                        |         |           |            |           |
| cg01888055                                                  | 19;SNORD115-17;SNORD115-18    | 3.66E-05          | 3.66E-05             | 0.288361           | -3.46788                     | T down vs N                            | 31.85   | 14.4838   | 7.27603    | 1         |
| cg01888566                                                  | MEST                          | 6.90E-05          | 6.90E-05             | 11.8564            | 11.8564                      | T up vs N                              | 28.307  | 57.2747   | 32.3731    | 1         |
| cg01891966                                                  | HoxA9                         | 0.00243638        | 0.00243638           | 0.242711           | -4.12013                     | T down vs N                            | 12.908  | 18.7766   | 23.275     | 1         |
| cg01893731                                                  | SPINT4                        | 5.70E-05          | 5.70E-05             | 0.157342           | -6.3556                      | T down vs N                            | 29.351  | 32.0327   | 17.4622    | 1         |
| cg01899542                                                  | ZNF423                        | 5.25E-05          | 5.25E-05             | 0.248112           | -4.03044                     | T down vs N                            | 29.803  | 18.1974   | 9.7696     | 1         |
| cg01899676                                                  | RFX4                          | 0.00355148        | 0.00355148           | 0.316207           | -3.16249                     | T down vs N                            | 11.657  | 12.416    | 17.0414    | 1         |
| cg01904145                                                  | PROK2;PROK2                   | 9.59E-07          | 9.59E-07             | 0.115203           | -8.68029                     | T down vs N                            | 58.776  | 43.7415   | 11.9073    | 1         |
| cg01905633                                                  | FAM50B                        | 0.0011642         | 0.0011642            | 3.20773            | 3.20773                      | T up vs N                              | 15.545  | 12.7243   | 13.0967    | 1         |
| cg01906055                                                  | NCAPH                         | 6.15E-05          | 6.15E-05             | 0.22243            | -4.4958                      | T down vs N                            | 28.926  | 21.1623   | 11.7057    | 1         |
| cg01907457                                                  | KCNAB2;KCNAB2                 | 8.33E-05          | 8.33E-05             | 0.143143           | -6.98601                     | T down vs N                            | 27.304  | 35.3927   | 20.7398    | 1         |
|                                                             |                               |                   |                      |                    |                              |                                        |         |           |            |           |
| cg01907476                                                  | LOC645166;LOC645166;LOC645166 | 6.13E-05          | 6.13E-05             | 0.096189           | -10.3962                     | T down vs N                            | 28.945  | 51.3486   | 28.3843    | 1         |

| Probeset ID | UCSC_REFGENE_NAME         | p-value<br>(Type) | p-value (T vs. N) | Ratio (T vs. N) | Fold-Change (T vs. N) | Fold-Change (T vs. N) (Description) | F(Type) | SS (Type) | SS (Error) | F (Error) |
|-------------|---------------------------|-------------------|-------------------|-----------------|-----------------------|-------------------------------------|---------|-----------|------------|-----------|
| cg01909921  | GFI1B;GFI1B               | 0.00080775        | 0.000807748       | 5.10337         | 5.10337               | T up vs N                           | 16.947  | 24.8819   | 23.4911    | 1         |
| cg01910638  | HLA-DMA                   | 0.00024016        | 0.00024016        | 0.272369        | -3.67149              | T down vs N                         | 22.103  | 15.8433   | 11.4687    | 1         |
| cg01916743  | SKI                       | 0.00437053        | 0.00437053        | 3.6304          | 3.6304                | T up vs N                           | 10.995  | 15.5704   | 22.6579    | 1         |
| cg01917259  | INPP5B                    | 5.49E-05          | 5.49E-05          | 0.268149        | -3.72927              | T down vs N                         | 29.557  | 16.2261   | 8.78376    | 1         |
| cg01917716  | MS4A3;MS4A3;MS4A3         | 2.79E-05          | 2.79E-05          | 0.207681        | -4.81508              | T down vs N                         | 33.46   | 23.1382   | 11.0643    | 1         |
| cg01918043  | UACA                      | 5.39E-06          | 5.39E-06          | 0.261323        | -3.82668              | T down vs N                         | 44.482  | 16.868    | 6.06735    | 1         |
| cg01919768  | TFR2                      | 1.27E-05          | 1.27E-05          | 0.304918        | -3.27957              | T down vs N                         | 38.437  | 13.2125   | 5.49984    | 1         |
| cg01921382  | SLC6A18                   | 6.72E-05          | 6.72E-05          | 0.264588        | -3.77946              | T down vs N                         | 28.446  | 16.5573   | 9.31286    | 1         |
| cg01922603  | CSGALNACT1;CSGALNACT1     | 0.00291606        | 0.00291606        | 0.324518        | -3.0815               | T down vs N                         | 12.594  | 11.165    | 13.2976    | 1         |
| cg01923516  | SDK1                      | 0.00694141        | 0.00694141        | 0.200867        | -4.52762              | T down vs N                         | 9.5837  | 21.3613   | 35.6629    | 1         |
| cg01924776  | ORAI2;ORAI2               | 0.00239163        | 0.00239163        | 0.327337        | -3.05495              | T down vs N                         | 12.971  | 11.6811   | 14.4091    | 1         |
| cg01925738  | PCDHB3                    | 0.00126846        | 0.00126846        | 5.80307         | 5.80307               | T up vs N                           | 15.226  | 28.9595   | 30.4326    | 1         |
| cg01925883  | TCHHL1                    | 5.40E-05          | 5.40E-05          | 0.102586        | -9.74792              | T down vs N                         | 29.645  | 48.5633   | 26.2106    | 1         |
| cg01931994  | FAM5B                     | 0.00099129        | 0.000991292       | 0.262043        | -3.81616              | T down vs N                         | 16.154  | 16.7989   | 16.6392    | 1         |
| cg01932223  | UTP14A;UTP14A             | 0.000161          | 0.000161004       | 0.310903        | -3.21644              | T down vs N                         | 23.986  | 12.7835   | 8.52737    | 1         |
| cg01932691  | CTSG                      | 0.00065134        | 0.000651341       | 0.329169        | -3.03795              | T down vs N                         | 17.805  | 11.5647   | 10.3926    | 1         |
| cg01933308  | NXPH1                     | 4.55E-06          | 4.55E-06          | 23.4985         | 23.4985               | T up vs N                           | 45.745  | 93.3456   | 32.6493    | 1         |
| cg01934709  | RHBDL2                    | 3.05E-05          | 3.05E-05          | 0.281097        | -3.55749              | T down vs N                         | 32.931  | 15.0842   | 7.32888    | 1         |
| cg01936122  | ZNF534;ZNF534             | 0.00207261        | 0.00207261        | 0.263743        | -3.79156              | T down vs N                         | 13.464  | 16.6371   | 19.7714    | 1         |
| cg01936488  | DUS2L                     | 0.00075233        | 0.000752327       | 0.323386        | -3.09228              | T down vs N                         | 17.228  | 11.9366   | 11.0859    | 1         |
| cg01937819  | ENG;ENG                   | 0.00047907        | 0.00047907        | 0.31272         | -3.19775              | T down vs N                         | 19.07   | 12.6563   | 10.6189    | 1         |
| cg01939443  | RGSL1                     | 1.43E-06          | 1.43E-06          | 0.193904        | -5.1572               | T down vs N                         | 55.191  | 25.2033   | 7.30652    | 1         |
| cg01939477  | MIR129-2                  | 0.00655883        | 0.00655883        | 3.03228         | 3.03228               | T up vs N                           | 9.7519  | 11.5258   | 18.9105    | 1         |
| cg01940336  | SLC8A2                    | 1.16E-05          | 1.16E-05          | 0.320118        | -3.12385              | T down vs N                         | 39.036  | 12.1523   | 4.981      | 1         |
| cg01940810  | IFNG                      | 0.0001272         | 0.000127196       | 0.283036        | -3.53312              | T down vs N                         | 25.141  | 14.9212   | 9.4959     | 1         |
| cg01941586  | PPIE;PPIE;PPIE            | 8.89E-07          | 8.89E-07          | 0.199756        | -5.0061               | T down vs N                         | 59.475  | 24.2979   | 6.5366     | 1         |
| cg01942226  | TRIM2;TRIM2               | 0.00375788        | 0.00375788        | 3.21809         | 3.21809               | T up vs N                           | 11.475  | 12.7948   | 17.8398    | 1         |
| cg01947066  | PML;PML;PML;PML;PML;PML;P |                   |                   |                 |                       |                                     |         |           |            |           |
|             | ML;PML                    | 3.91E-05          | 3.91E-05          | 0.231107        | -4.327                | T down vs N                         | 31.479  | 20.0984   | 10.2156    | 1         |
| cg01948202  | PARP14                    | 2.49E-05          | 2.49E-05          | 0.12045         | -8.30222              | T down vs N                         | 34.168  | 41.9573   | 19.6476    | 1         |
| cg01949993  | LAMC2;LAMC2               | 0.00073132        | 0.00073132        | 9.81742         | 9.81742               | T up vs N                           | 17.34   | 48.8668   | 45.0898    | 1         |
| cg01        |                           |                   |                   |                 |                       |                                     |         |           |            |           |

| Probeset ID                                                  | UCSC_REFGENE_NAME             | p-value<br>(Type) | p-value (T vs.<br>N) | Ratio (T<br>vs. N) | Fold-<br>Change (T<br>vs. N) | Fold-Change (T vs.<br>N) (Description) | F(Type) | SS (Type) | SS (Error) | F (Error) |
|--------------------------------------------------------------|-------------------------------|-------------------|----------------------|--------------------|------------------------------|----------------------------------------|---------|-----------|------------|-----------|
| cg02009395                                                   | ACSM1                         | 0.0007489         | 0.000748902          | 0.329278           | -3.03694                     | T down vs N                            | 17.246  | 11.5578   | 10.7228    | 1         |
| cg02010152                                                   | HLA-DOB                       | 7.90E-05          | 7.90E-05             | 0.301937           | -3.31195                     | T down vs N                            | 27.587  | 13.432    | 7.79021    | 1         |
| cg02010738                                                   | C19orf36;MOBK2A;C19orf36      | 0.00021361        | 0.000213613          | 0.282867           | -3.53523                     | T down vs N                            | 22.645  | 14.9354   | 10.5528    | 1         |
| cg02011607                                                   | TBX5;TBX5;TBX5                | 2.49E-06          | 2.49E-06             | 0.207262           | -4.82481                     | T down vs N                            | 50.495  | 23.1977   | 7.35047    | 1         |
| cg02011981                                                   | CTTN;CTTN                     | 0.00645173        | 0.00645173           | 0.318982           | -3.13497                     | T down vs N                            | 9.801   | 12.2283   | 19.9625    | 1         |
| cg02015823                                                   | NKD1                          | 1.24E-05          | 1.24E-05             | 0.278816           | -3.58659                     | T down vs N                            | 38.618  | 15.2785   | 6.33015    | 1         |
| cg02015909                                                   | CES8                          | 1.91E-06          | 1.91E-06             | 10.3008            | 10.3008                      | T up vs N                              | 52.681  | 50.9448   | 15.4726    | 1         |
| cg02017074                                                   | FBXW8;FBXW8                   | 9.46E-05          | 9.46E-05             | 0.169886           | -5.88631                     | T down vs N                            | 26.645  | 29.4305   | 17.6725    | 1         |
| cg02017155                                                   | FFAR3                         | 3.32E-07          | 3.32E-07             | 0.310935           | -3.21611                     | T down vs N                            | 69.217  | 12.7813   | 2.95447    | 1         |
| cg02020018                                                   | PRRG3                         | 0.00013392        | 0.000133917          | 0.241878           | -4.13432                     | T down vs N                            | 24.886  | 18.8679   | 12.1308    | 1         |
| cg02020350                                                   | FPR1                          | 0.00031086        | 0.00031086           | 0.246416           | -4.05817                     | T down vs N                            | 20.938  | 18.3769   | 14.0427    | 1         |
| cg02020829                                                   | FLJ42709;FLJ42709             | 3.95E-05          | 3.95E-05             | 4.64372            | 4.64372                      | T up vs N                              | 31.42   | 22.0836   | 11.2455    | 1         |
| cg02021127                                                   | PIP5K1                        | 0.00023894        | 0.000238935          | 0.249392           | -4.00975                     | T down vs N                            | 22.127  | 18.0633   | 13.0617    | 1         |
| cg02021789                                                   | CASP14                        | 3.68E-05          | 3.68E-05             | 0.176507           | -5.66548                     | T down vs N                            | 31.831  | 28.1745   | 14.1623    | 1         |
| cg02023138                                                   | BIN2                          | 3.74E-06          | 3.74E-06             | 0.17103            | -5.84693                     | T down vs N                            | 47.261  | 29.208    | 9.88822    | 1         |
| cg02023973                                                   | CLCN7;CLCN7                   | 0.00019917        | 0.000199168          | 0.278815           | -5.88661                     | T down vs N                            | 22.972  | 15.2787   | 10.6414    | 1         |
| cg02026449                                                   | MARVELD3;MARVELD3             | 0.00091336        | 0.000913355          | 3.26236            | 3.26236                      | T up vs N                              | 16.469  | 13.0957   | 12.7231    | 1         |
| cg02027735                                                   | C20orf95                      | 6.22E-07          | 6.22E-07             | 0.214812           | -4.65523                     | T down vs N                            | 62.875  | 22.1549   | 5.63781    | 1         |
| cg02027878                                                   | ATG9B;NOS3                    | 0.00023674        | 0.000236737          | 4.70634            | 4.70634                      | T up vs N                              | 22.169  | 22.4706   | 16.2176    | 1         |
| cg02030908                                                   | THRA;NR1D1                    | 0.00027207        | 0.000272066          | 3.62638            | 3.62638                      | T up vs N                              | 21.535  | 15.5436   | 11.5484    | 1         |
| cg02033258                                                   | PDLIM4;PDLIM4                 | 0.00051649        | 0.000516485          | 36.5626            | 36.5626                      | T up vs N                              | 18.756  | 121.32    | 103.496    | 1         |
| cg02035698                                                   | ZNF185                        | 0.0022778         | 0.0022778            | 0.205887           | -4.85702                     | T down vs N                            | 13.138  | 23.3943   | 28.4914    | 1         |
| cg02037794                                                   | C6orf145                      | 3.38E-05          | 3.38E-05             | 0.241195           | -4.14602                     | T down vs N                            | 32.316  | 18.9431   | 9.379      | 1         |
| cg02037905                                                   | SCGB1D4                       | 1.97E-06          | 1.97E-06             | 0.314528           | -3.17937                     | T down vs N                            | 52.445  | 12.5311   | 3.82302    | 1         |
| cg02045355                                                   | BTN3A2                        | 8.00E-05          | 8.00E-05             | 0.283986           | -3.5213                      | T down vs N                            | 27.518  | 14.8421   | 8.62982    | 1         |
| cg02045493                                                   | ANO6;ANO6;ANO6;ANO6           | 0.00088936        | 0.000889356          | 0.331879           | -3.01315                     | T down vs N                            | 16.572  | 11.3947   | 11.0016    | 1         |
| cg02045745                                                   | USP7                          | 1.05E-05          | 1.05E-05             | 0.267375           | -3.74007                     | T down vs N                            | 39.719  | 16.2975   | 6.56504    | 1         |
| cg02045936                                                   | INS-IGF2;IGF2;IGF2;IGF2       | 0.00077116        | 0.000771164          | 0.316386           | -3.1607                      | T down vs N                            | 17.13   | 12.4038   | 11.5857    | 1         |
| cg02046187                                                   | GLG1;GLG1;GLG1;GLG1;GLG1      | 5.58E-06          | 5.58E-06             | 0.250307           | -3.99509                     | T down vs N                            | 44.217  | 17.9681   | 6.50186    | 1         |
| cg02046532                                                   | DEFB129                       | 0.00163617        | 0.00163617           | 0.309385           | -3.23222                     | T down vs N                            | 14.298  | 12.8909   | 14.4255    | 1         |
| cg02047051                                                   | TMEM40                        | 0.00445841        | 0.00445841           | 0.326675           | -3.06115                     | T down vs N                            | 10.933  | 11.7236   | 17.1577    | 1         |
| PCDHA6;PCDHA2;PCDHA1;PCDHA1;PCDHA6;PCDHA5;PCDHA3;PCDHA4;PCD  |                               |                   |                      |                    |                              |                                        |         |           |            |           |
| cg02047300                                                   | HA6                           | 0.000891          | 0.000890995          | 3.74204            | 3.74204                      | T up vs N                              | 16.565  | 16.3105   | 15.7547    | 1         |
| cg02047547                                                   | ITPRIPL2;ITPRIPL2             | 0.00015741        | 0.000157411          | 7.51675            | 7.51675                      | T up vs N                              | 24.095  | 38.1093   | 25.306     | 1         |
| cg02051688                                                   | SIK2                          | 1.50E-05          | 1.50E-05             | 0.25457            | -3.92819                     | T down vs N                            | 39.322  | 16.5013   | 6.29473    | 1         |
| PCDHA7;PCDHA12;PCDHA6;PCDHA10;PCDHA4;PCDHA11;PCDHA8;PCDHA1;P |                               |                   |                      |                    |                              |                                        |         |           |            |           |
| cg02051771                                                   | CDHA2;PCDHA6;PCDHA1;PCDHA9;   | 5.20E-05          | 5.20E-05             | 9.85102            | 9.85102                      | T up vs N                              | 29.851  | 49.0131   | 26.2712    | 1         |
| cg02052265                                                   | C1orf150                      | 0.00039318        | 0.000393178          | 0.323688           | -3.08939                     | T down vs N                            | 19.911  | 11.9168   | 9.57627    | 1         |
| cg02056062                                                   | WWTR1;WWTR1;WWTR1             | 5.59E-05          | 5.59E-05             | 3.63214            | 3.63214                      | T up vs N                              | 29.457  | 15.5819   | 8.46361    | 1         |
| PCDHGA4;PCDHGC3;PCDHGA12;PCDHGA11;PCDHGA11;PCDHGA9;PCDHGA1   |                               |                   |                      |                    |                              |                                        |         |           |            |           |
| cg02056653                                                   | ;PCDHGB1;PCDHGB6;PCDHGB3;PCDH | 0.00113031        | 0.00113031           | 0.306937           | -3.258                       | T down vs N                            | 15.656  | 13.0661   | 13.3532    | 1         |
| cg02057755                                                   | AGBL4                         | 3.74E-09          | 3.74E-09             | 0.230889           | -4.33109                     | T down vs N                            | 132.57  | 20.1244   | 2.42883    | 1         |
| cg02058924                                                   | CHFR;CHFR;CHFR;CHFR;CHFR      | 0.00059525        | 0.000595252          | 3.39424            | 3.39424                      | T up vs N                              | 18.17   | 13.9881   | 12.3174    | 1         |
| cg02059755                                                   | HEPH;HEPH;HEPH                | 7.80E-05          | 7.80E-05             | 0.150139           | -6.66049                     | T down vs N                            | 27.649  | 33.6765   | 19.4878    | 1         |
| cg02060465                                                   | SPRR4                         | 3.54E-05          | 3.54E-05             | 0.15857            | -6.30636                     | T down vs N                            | 32.046  | 31.7638   | 15.8592    | 1         |
| cg02063488                                                   | FBXO41                        | 0.00310841        | 0.00310841           | 3.4317             | 3.4317                       | T up vs N                              | 12.092  | 14.2405   | 18.8424    | 1         |
| cg02063846                                                   | LOC284798                     | 0.00010045        | 0.000100454          | 0.316076           | -3.1638                      | T down vs N                            | 26.334  | 12.425    | 7.54928    | 1         |
| cg02064848                                                   | OR2T29                        | 0.00687342        | 0.00687342           | 0.269812           | -3.70628                     | T down vs N                            | 9.6128  | 16.074    | 26.7544    | 1         |
| cg02066813                                                   | LOC642006                     | 6.27E-05          | 6.27E-05             | 0.084672           | -11.8103                     | T down vs N                            | 28.824  | 57.0944   | 31.6926    | 1         |
| cg02068318                                                   | DGKD;DGKD                     | 9.74E-05          | 9.74E-05             | 0.255043           | -3.92091                     | T down vs N                            | 26.494  | 17.4851   | 10.5595    | 1         |
| cg02071988                                                   | TIAM2                         | 0.00029372        | 0.000293719          | 0.205728           | -4.86079                     | T down vs N                            | 21.191  | 23.4172   | 17.6809    | 1         |
| cg02072170                                                   | FAM43A                        | 6.91E-05          | 6.91E-05             | 0.258555           | -3.86765                     | T down vs N                            | 28.296  | 17.1368   | 9.68993    | 1         |
| cg02073839                                                   | KIF25;KIF25                   | 0.00113333        | 0.00113333           | 0.295895           | -3.37957                     | T down vs N                            | 15.646  | 13.8892   | 14.2036    | 1         |
| cg02074780                                                   | SLC45A2;SLC45A2               | 2.10E-06          | 2.10E-06             | 0.215332           | -4.64399                     | T down vs N                            | 51.918  | 22.0853   | 6.80617    | 1         |
| cg02075221                                                   | KLK2;KLK2                     | 0.00010039        | 0.000100391          | 0.265701           | -3.76363                     | T down vs N                            | 26.337  | 16.453    | 9.99543    | 1         |
| cg02077084                                                   | OR2T6                         | 0.00013717        | 0.000137169          | 0.238096           | -4.19998                     | T down vs N                            | 24.768  | 19.2892   | 12.461     | 1         |
| cg02078520                                                   | RPF1                          | 2.03E-05          | 2.03E-05             | 0.144012           | -6.94387                     | T down vs N                            | 35.437  | 35.1727   | 15.8807    | 1         |
| cg02081733                                                   | LBXCOR1                       | 0.00104974        | 0.00104974           | 4.41666            | 4.41666                      | T up vs N                              | 15.935  | 20.6651   | 20.749     | 1         |
| cg02086166                                                   | ANO2                          | 0.00152036        | 0.00152036           | 0.325245           | -3.07461                     | T down vs N                            | 14.562  | 11.8157   | 12.9822    | 1         |
| cg02086286                                                   | ABCF1;ABCF1                   | 0.00143607        | 0.00143607           | 0.307777           | -3.24911                     | T down vs N                            | 14.769  | 13.0057   | 14.0893    | 1         |
| cg02086310                                                   | ACSS1                         | 2.86E-06          | 2.86E-06             | 0.284589           | -3.51384                     | T down vs N                            | 49.363  | 14.7921   | 4.7946     | 1         |
| cg02088470                                                   | ADARB2                        | 0.000751          | 0.000750995          | 0.189787           | -5.26907                     | T down vs N                            | 17.235  | 25.8671   | 24.0138    | 1         |
| cg02089452                                                   | ANKRD11                       | 0.00278367        | 0.00278367           | 0.162856           | -6.14038                     | T down vs N                            | 12.458  | 30.8504   | 39.6204    | 1         |
| cg02090762                                                   | FSCN2;FSCN2                   | 3.25E-05          | 3.25E-05             | 5.62687            | 5.62687                      | T up vs N                              | 32.551  | 27.9528   | 13.7397    | 1         |
| cg02091100                                                   | GUC1A1A                       | 3.39E-05          | 3.39E-05             | 0.307783           | -3.24904                     | T down vs N                            | 32.302  | 13.0052   | 6.44186    | 1         |
| cg02093006                                                   | ARHGAP12                      | 0.00221262        | 0.00221262           | 0.203252           | -4.92                        | T down vs N                            | 13.237  | 23.7772   | 28.7394    | 1         |
| cg02094283                                                   | NNMT                          | 0.0007032         | 0.000703198          | 0.241574           | -4.13951                     | T down vs N                            | 17.497  | 18.9013   | 17.2845    | 1         |

| Probeset ID                                                | UCSC_REFGENE_NAME             | p-value<br>(Type) | p-value (T vs.<br>N) | Ratio (T<br>vs. N) | Fold-<br>Change (T<br>vs. N) | Fold-Change (T vs.<br>N) (Description) | F(Type) | SS (Type) | SS (Error) | F (Error) |
|------------------------------------------------------------|-------------------------------|-------------------|----------------------|--------------------|------------------------------|----------------------------------------|---------|-----------|------------|-----------|
| cg02095596                                                 | NUP93                         | 0.00021026        | 0.000210256          | 0.262872           | -3.80413                     | T down vs N                            | 22.719  | 16.7198   | 11.7752    | 1         |
| cg02097014                                                 | CHI3L1                        | 0.00038028        | 0.000380283          | 0.276143           | -3.62132                     | T down vs N                            | 20.738  | 14.5976   | 10.5588    | 1         |
| cg02097479                                                 | PIGW;MYO19;MYO19;MYO19        | 4.69E-05          | 4.69E-05             | 0.249318           | -4.01095                     | T down vs N                            | 30.428  | 18.071    | 9.50225    | 1         |
| cg02099148                                                 | CDYL                          | 0.0001764         | 0.000176401          | 0.267828           | -3.73374                     | T down vs N                            | 23.547  | 16.2557   | 11.0454    | 1         |
| cg02099572                                                 | COL4A1                        | 0.00419296        | 0.00419296           | 0.11349            | -8.81138                     | T down vs N                            | 11.126  | 44.3503   | 63.779     | 1         |
| cg02100604                                                 | CEP350                        | 0.00124583        | 0.00124583           | 0.251433           | -3.97721                     | T down vs N                            | 15.292  | 17.8519   | 18.6781    | 1         |
| cg02105042                                                 | CLDN6;TNFRSF12A               | 6.97E-05          | 6.97E-05             | 0.269588           | -3.70937                     | T down vs N                            | 28.253  | 16.0944   | 9.11448    | 1         |
| cg02105352                                                 | NAT8B                         | 1.86E-05          | 1.86E-05             | 0.241522           | -4.14041                     | T down vs N                            | 35.981  | 18.9071   | 8.40748    | 1         |
| cg02105856                                                 | PIGR;PIGR                     | 8.54E-07          | 8.54E-07             | 0.281198           | -3.55621                     | T down vs N                            | 59.855  | 15.0756   | 4.02994    | 1         |
| cg02106682                                                 | HXA5                          | 0.00044032        | 0.000440317          | 4.42738            | 4.42738                      | T up vs N                              | 19.426  | 20.7327   | 17.0761    | 1         |
| cg02107842                                                 | MAST4;MAST4;MAST4             | 0.00138196        | 0.00138196           | 3.02514            | 3.02514                      | T up vs N                              | 14.91   | 11.4768   | 12.316     | 1         |
| cg02109484                                                 | C2orf65                       | 7.75E-05          | 7.75E-05             | 8.17242            | 8.17242                      | T up vs N                              | 27.684  | 41.3349   | 23.8897    | 1         |
| cg02110822                                                 | FGF16                         | 0.0047369         | 0.0047369            | 0.324623           | -3.0805                      | T down vs N                            | 10.743  | 11.856    | 17.6574    | 1         |
| cg02110963                                                 | C6orf218                      | 5.17E-06          | 5.17E-06             | 0.288506           | -3.46613                     | T down vs N                            | 44.785  | 14.4721   | 5.1703     | 1         |
| cg02117884                                                 | LY6G6D;LY6G6E;LY6G6E          | 9.78E-06          | 9.78E-06             | 3.60784            | 3.60784                      | T up vs N                              | 40.223  | 15.4201   | 6.13389    | 1         |
| cg02118886                                                 | SYNJ2                         | 0.0027939         | 0.0027939            | 0.215663           | -4.63686                     | T down vs N                            | 12.446  | 22.0411   | 28.3347    | 1         |
| cg02119840                                                 | ACTR3C;LRRC61;LRRC61          | 0.00237099        | 0.00237099           | 4.02174            | 4.02174                      | T up vs N                              | 13      | 18.141    | 22.3268    | 1         |
| cg02120470                                                 | INSL5                         | 0.00064371        | 0.000643713          | 0.188918           | -5.29331                     | T down vs N                            | 17.852  | 26.0101   | 23.3116    | 1         |
| cg02126435                                                 | RFWD3                         | 0.00183725        | 0.00183725           | 0.22706            | -4.40412                     | T down vs N                            | 15.814  | 15.6847   | 11.9019    | 1         |
| cg02127127                                                 | TMEM213                       | 0.00037775        | 0.000377751          | 0.219795           | -4.54969                     | T down vs N                            | 20.084  | 21.4991   | 17.1278    | 1         |
| cg02127888                                                 | CRAMP1L                       | 5.46E-05          | 5.46E-05             | 0.254182           | -3.93419                     | T down vs N                            | 29.581  | 17.5718   | 9.50435    | 1         |
| cg02131465                                                 | RD3;RD3                       | 0.0006777         | 0.000677703          | 0.303251           | -3.29759                     | T down vs N                            | 17.645  | 13.3347   | 12.0917    | 1         |
| cg02131853                                                 | TMEM156                       | 5.31E-06          | 5.31E-06             | 0.170831           | -5.85372                     | T down vs N                            | 44.589  | 29.2464   | 10.4946    | 1         |
| cg02132163                                                 | FABP5                         | 2.17E-05          | 2.17E-05             | 21.5394            | 21.5394                      | T up vs N                              | 35.015  | 88.2684   | 40.3345    | 1         |
| cg02133070                                                 | TACR3                         | 0.0038022         | 0.0038022            | 0.237915           | -4.20318                     | T down vs N                            | 11.438  | 19.3096   | 27.0121    | 1         |
| cg02140508                                                 | RAD51AP1;RAD51AP1             | 2.32E-05          | 2.32E-05             | 0.23629            | -4.23208                     | T down vs N                            | 34.601  | 19.4944   | 9.01438    | 1         |
| cg02143743                                                 | AGBL1                         | 0.00396623        | 0.00396623           | 3.03698            | 3.03698                      | T up vs N                              | 11.303  | 11.558    | 16.3616    | 1         |
| cg02146383                                                 | C16orf52                      | 0.00260577        | 0.00260577           | 0.293034           | -3.41257                     | T down vs N                            | 12.68   | 14.1117   | 17.8065    | 1         |
| cg02146412                                                 | DLG2;DLG2;DLG2                | 0.00011349        | 0.000113492          | 0.267661           | -3.73607                     | T down vs N                            | 25.713  | 16.271    | 10.1248    | 1         |
| cg02147617                                                 | CLEC3B                        | 1.68E-06          | 1.68E-06             | 0.323944           | -3.08696                     | T down vs N                            | 53.809  | 11.9001   | 3.53851    | 1         |
| cg02148270                                                 | KIAA1430                      | 0.00171939        | 0.00171939           | 0.304441           | -3.28471                     | T down vs N                            | 14.121  | 13.2473   | 15.0104    | 1         |
| cg02149446                                                 | C5AR1                         | 0.00018536        | 0.000185358          | 0.285348           | -3.5045                      | T down vs N                            | 23.312  | 14.7295   | 10.1096    | 1         |
| cg02150231                                                 | TBC1D22A                      | 2.77E-11          | 2.77E-11             | 0.247985           | -4.0325                      | T down vs N                            | 257.45  | 18.2107   | 1.13177    | 1         |
| cg02150910                                                 | GZMH                          | 0.00018326        | 0.000183264          | 0.214321           | -4.66589                     | T down vs N                            | 23.366  | 22.2208   | 15.2161    | 1         |
| cg02152108                                                 | RAC2                          | 4.63E-05          | 4.63E-05             | 0.296991           | -3.36711                     | T down vs N                            | 30.504  | 13.8051   | 7.24114    | 1         |
| cg02156776                                                 | COL9A1                        | 0.00064518        | 0.000645183          | 0.329687           | -3.03318                     | T down vs N                            | 17.843  | 11.532    | 10.3409    | 1         |
| cg02159271                                                 | ZNF76                         | 4.69E-05          | 4.69E-05             | 0.330492           | -3.02579                     | T down vs N                            | 30.428  | 11.4813   | 6.03719    | 1         |
| cg02159913                                                 | JAG2;JAG2                     | 0.00054212        | 0.000542124          | 5.35412            | 5.35412                      | T up vs N                              | 18.555  | 26.368    | 22.7377    | 1         |
| PCDHGA4;PCDHGA12;PCDHGA11;PCDHGA11;PCDHGA9;PCDHGA1;PCDHGB1 |                               |                   |                      |                    |                              |                                        |         |           |            |           |
| cg02161292                                                 | ;PCDHGB6;PCDHGB3;PCDHGB7;PCDH | 0.00068957        | 0.000689573          | 3.03775            | 3.03775                      | T up vs N                              | 17.575  | 11.5633   | 10.527     | 1         |
| cg02161478                                                 | OTX2OS1                       | 8.86E-05          | 8.86E-05             | 0.273282           | -3.65922                     | T down vs N                            | 26.985  | 15.7619   | 9.34566    | 1         |
| cg02161900                                                 | MKX                           | 0.00451118        | 0.00451118           | 3.02376            | 3.02376                      | T up vs N                              | 10.896  | 11.4674   | 16.8396    | 1         |
| cg02165693                                                 | SLC22A9                       | 7.98E-05          | 7.98E-05             | 0.153606           | -6.51015                     | T down vs N                            | 27.528  | 32.8704   | 19.1051    | 1         |
| cg02166981                                                 | KCNK2;KCNK2                   | 2.12E-05          | 2.12E-05             | 0.187646           | -5.32917                     | T down vs N                            | 35.153  | 26.2214   | 11.9349    | 1         |
| cg02169185                                                 | CUX1;CUX1                     | 2.85E-06          | 2.85E-06             | 0.235718           | -4.24236                     | T down vs N                            | 49.391  | 19.56     | 6.33641    | 1         |
| cg02169391                                                 | MEST;MEST                     | 8.24E-06          | 8.24E-06             | 10.8986            | 10.8986                      | T up vs N                              | 41.41   | 53.4393   | 20.6478    | 1         |
| cg02171725                                                 | KIAA1429;KIAA1429             | 1.63E-05          | 1.63E-05             | 0.183283           | -5.45604                     | T down vs N                            | 36.813  | 26.9639   | 11.7195    | 1         |
| cg02172492                                                 | OSR1                          | 5.77E-05          | 5.77E-05             | 5.48709            | 5.48709                      | T up vs N                              | 29.274  | 27.1446   | 14.836     | 1         |
| cg02173072                                                 | ARSD                          | 0.00022954        | 0.000229541          | 0.203221           | -4.92076                     | T down vs N                            | 22.311  | 23.7819   | 17.0546    | 1         |
| cg02176678                                                 | TTL4                          | 1.10E-05          | 1.10E-05             | 0.242376           | -4.12582                     | T down vs N                            | 39.435  | 18.8132   | 7.63308    | 1         |
| cg02180633                                                 | MFS07                         | 0.00392322        | 0.00392322           | 0.279006           | -3.58415                     | T down vs N                            | 11.337  | 15.2622   | 21.539     | 1         |
| cg02182272                                                 | ATP4B                         | 8.93E-06          | 8.93E-06             | 0.283321           | -3.52957                     | T down vs N                            | 40.849  | 14.8975   | 5.83511    | 1         |
| cg02182827                                                 | TTC39A                        | 2.69E-07          | 2.69E-07             | 0.306814           | -3.2593                      | T down vs N                            | 71.482  | 13.0749   | 2.92661    | 1         |
| cg02183297                                                 | KCNE1L;KCNE1L                 | 0.00091516        | 0.000915162          | 0.332346           | -3.00891                     | T down vs N                            | 16.461  | 11.3656   | 11.0474    | 1         |
| cg02184413                                                 | VNN1                          | 0.00010255        | 0.000102552          | 0.185444           | -5.39248                     | T down vs N                            | 26.228  | 26.5928   | 16.2227    | 1         |
| cg02184673                                                 | ASAM                          | 0.00014747        | 0.000147473          | 15.1149            | 15.1149                      | T up vs N                              | 24.412  | 69.0746   | 45.2722    | 1         |
| cg02185190                                                 | SLC25A43                      | 3.85E-05          | 3.85E-05             | 0.245449           | -4.07416                     | T down vs N                            | 31.564  | 18.4802   | 9.36786    | 1         |
| cg02192204                                                 | CBFA2T3;CBFA2T3               | 0.00015571        | 0.000155713          | 3.99239            | 3.99239                      | T up vs N                              | 24.148  | 17.9506   | 11.8939    | 1         |
| cg02192228                                                 | OXTR                          | 1.11E-05          | 1.11E-05             | 6.83554            | 6.83554                      | T up vs N                              | 39.385  | 34.6043   | 14.0578    | 1         |
| cg02192965                                                 | SLC3A1                        | 0.00010595        | 0.000105948          | 0.138986           | -7.19495                     | T down vs N                            | 26.062  | 36.474    | 22.3925    | 1         |
| cg02194789                                                 | SIM2;SIM2                     | 0.00167338        | 0.00167338           | 0.306989           | -3.25744                     | T down vs N                            | 14.218  | 13.0623   | 14.7       | 1         |
| cg02195657                                                 | VWA5B1                        | 1.65E-05          | 1.65E-05             | 0.271395           | -3.68467                     | T down vs N                            | 36.749  | 15.9308   | 6.93611    | 1         |
| cg02197938                                                 | PSMD12;PSMD12                 | 4.25E-05          | 4.25E-05             | 0.242178           | -4.12919                     | T down vs N                            | 30.994  | 18.8349   | 9.72309    | 1         |
| cg02200642                                                 | OR5E1P                        | 2.00E-06          | 2.00E-06             | 0.217552           | -4.59661                     | T down vs N                            | 52.291  | 21.7913   | 6.66775    | 1         |
| CCL15;CCL14-CCL15;CCL15;CCL14-CCL15                        |                               |                   |                      |                    |                              |                                        |         |           |            |           |
| cg02202061                                                 | CCL15                         | 1.15E-05          | 1.15E-05             | 0.307263           | -3.25454                     | T down vs N                            | 39.103  | 13.0426   | 5.33671    | 1         |
| cg02202246                                                 | PWWP2B;PWWP2B                 | 0.00059623        | 0.000596229          | 0.226907           | -4.40708                     | T down vs N                            | 18.164  | 20.6048   | 18.1504    | 1         |
| cg02202484                                                 | SPRR4                         | 0.00303868        | 0.00303868           | 0.288291           | -3.46872                     | T down vs N                            | 12.167  | 14.4895   | 19.0539    | 1         |
| cg02208891                                                 | LHPP;LHPP                     | 0.00077408        | 0.000774083          | 0.303751           | -3.29217                     | T down vs N                            | 17.115  | 13.2979   | 12.4316    | 1         |
| cg02211735                                                 | OR52A4                        | 2.09E-05          | 2.09E-05             | 0.22694            | -4.40645                     | T down vs N                            | 35.241  | 20.6008   | 9.35325    | 1         |

| Probeset ID                                                                                     | UCSC_REFGENE_NAME          | p-value<br>(Type) | p-value (T vs.<br>N) | Ratio (T<br>vs. N) | Fold-<br>Change (T<br>vs. N) | Fold-Change (T vs.<br>N) (Description) | F(Type) | SS (Type) | SS (Error) | F (Error) |
|-------------------------------------------------------------------------------------------------|----------------------------|-------------------|----------------------|--------------------|------------------------------|----------------------------------------|---------|-----------|------------|-----------|
| cg02211983                                                                                      | TCHH                       | 5.71E-06          | 5.71E-06             | 0.247217           | -0.40503                     | T down vs N                            | 44.053  | 18.2919   | 6.64363    | 1         |
| cg02212310                                                                                      | BAT2                       | 0.00019053        | 0.000190534          | 3.24452            | 3.24452                      | T up vs N                              | 65.531  | 5.76644   | 0.527971   | 1         |
| cg02212855                                                                                      | PRAP1;PRAP1                | 5.82E-05          | 5.82E-05             | 0.223946           | -4.46536                     | T down vs N                            | 29.229  | 20.9714   | 11.4799    | 1         |
| cg02215357                                                                                      | HNRNPA1L2;HNRNPA1L2        | 2.27E-05          | 2.27E-05             | 0.225998           | -4.42482                     | T down vs N                            | 34.715  | 20.7165   | 9.54816    | 1         |
| cg02217063                                                                                      | A2BP1;A2BP1                | 0.00084087        | 0.000840874          | 0.281767           | -3.54903                     | T down vs N                            | 16.79   | 15.0277   | 14.3207    | 1         |
| cg02217814                                                                                      | FAM125A                    | 3.94E-06          | 3.94E-06             | 0.266942           | -3.74614                     | T down vs N                            | 46.857  | 16.3375   | 5.57871    | 1         |
| cg02218214                                                                                      | DOCK7;ANGPTL3              | 0.00126227        | 0.00126227           | 0.235768           | -4.24146                     | T down vs N                            | 15.244  | 19.5542   | 20.5246    | 1         |
| cg02218506                                                                                      | TCERG1L                    | 8.40E-05          | 8.40E-05             | 0.18609            | -5.37374                     | T down vs N                            | 27.261  | 26.4831   | 15.5437    | 1         |
| cg02219949                                                                                      | SP6                        | 6.31E-07          | 6.31E-07             | 0.162349           | -6.15958                     | T down vs N                            | 62.729  | 30.9566   | 7.89601    | 1         |
| PTPN20B;PTPN20A;PTPN20B;PTPN20<br>B;PTPN20B;PTPN20B;PTPN20A;PTPN2                               |                            |                   |                      |                    |                              |                                        |         |           |            |           |
| cg02222362                                                                                      | OA;PTPN20A;PTPN20A;PTPN20A | 0.00048359        | 0.000483589          | 3.01269            | 3.01269                      | T up vs N                              | 19.031  | 11.3915   | 9.5775     | 1         |
| cg02228160                                                                                      | HMH81                      | 2.90E-06          | 2.90E-06             | 0.285402           | -3.50382                     | T down vs N                            | 49.249  | 14.725    | 4.78387    | 1         |
| cg02229461                                                                                      | HIP1                       | 0.00033217        | 0.000332168          | 0.298095           | -3.35464                     | T down vs N                            | 20.645  | 13.7208   | 10.6336    | 1         |
| cg02229946                                                                                      | IL1F7;IL1F7;IL1F7;IL1F7    | 2.44E-07          | 2.44E-07             | 0.199829           | -5.00427                     | T down vs N                            | 72.552  | 24.2868   | 5.35601    | 1         |
| cg02230593                                                                                      | EMX2OS                     | 0.0010699         | 0.0010699            | 0.146135           | -6.84299                     | T down vs N                            | 15.863  | 34.6435   | 34.9423    | 1         |
| cg02231404                                                                                      | SOX18                      | 0.00072584        | 0.000725837          | 12.169             | 12.169                       | T up vs N                              | 17.37   | 58.4866   | 53.873     | 1         |
| cg02234352                                                                                      | FAM90A13;FAM90A14          | 0.00020557        | 0.000205567          | 0.160093           | -6.24636                     | T down vs N                            | 22.824  | 31.4349   | 22.0363    | 1         |
| cg02235497                                                                                      | ADAM12;ADAM12              | 1.01E-05          | 1.01E-05             | 0.168056           | -5.95038                     | T down vs N                            | 39.985  | 29.7911   | 11.9209    | 1         |
| cg02235529                                                                                      | OR8U8;OR5M11               | 4.96E-09          | 4.96E-09             | 0.148111           | -6.75169                     | T down vs N                            | 127.44  | 34.1613   | 4.28897    | 1         |
| cg02236673                                                                                      | TMPRSS4;TMPRSS4            | 0.00148341        | 0.00148341           | 0.288697           | -3.46384                     | T down vs N                            | 14.651  | 14.4567   | 15.7874    | 1         |
| cg02236847                                                                                      | A2BP1;A2BP1;A2BP1          | 4.73E-06          | 4.73E-06             | 0.139398           | -7.17372                     | T down vs N                            | 45.455  | 36.3648   | 12.8002    | 1         |
| cg02236890                                                                                      | C3orf19                    | 0.00015342        | 0.000153424          | 0.243059           | -4.11423                     | T down vs N                            | 24.22   | 18.7386   | 12.3792    | 1         |
| cg02239453                                                                                      | FBXO3;FBXO3                | 0.00040594        | 0.000405941          | 0.298593           | -3.34904                     | T down vs N                            | 19.773  | 13.683    | 11.0719    | 1         |
| cg02243278                                                                                      | MYOM2                      | 0.00412898        | 0.00412898           | 0.296544           | -3.37218                     | T down vs N                            | 11.175  | 13.8393   | 19.8151    | 1         |
| cg02243303                                                                                      | MCM3                       | 0.00015881        | 0.00015881           | 0.301496           | -3.31679                     | T down vs N                            | 24.052  | 13.4647   | 8.95702    | 1         |
| cg02244970                                                                                      | ORA4A15                    | 6.65E-05          | 6.65E-05             | 0.143794           | -6.95437                     | T down vs N                            | 29.756  | 33.1554   | 16.7139    | 1         |
| cg02245566                                                                                      | OR6K2                      | 4.43E-10          | 4.43E-10             | 0.097192           | -10.2889                     | T down vs N                            | 177.67  | 50.8946   | 4.5833     | 1         |
| cg02249030                                                                                      | USP45                      | 0.00206605        | 0.00206605           | 0.202227           | -4.94494                     | T down vs N                            | 13.475  | 23.9284   | 28.4131    | 1         |
| cg02249292                                                                                      | MKX                        | 0.00064896        | 0.000648957          | 4.42832            | 4.42832                      | T up vs N                              | 17.819  | 20.7386   | 18.6212    | 1         |
| cg02255510                                                                                      | HEATR5B;CCDC75             | 0.00022637        | 0.000226371          | 0.291345           | -3.43236                     | T down vs N                            | 22.376  | 14.245    | 10.1861    | 1         |
| cg02258387                                                                                      | LDHB                       | 0.00217537        | 0.00217537           | 0.327227           | -3.05598                     | T down vs N                            | 13.296  | 11.6882   | 14.0653    | 1         |
| cg02263377                                                                                      | ADSSL1;ADSSL1              | 2.86E-06          | 2.86E-06             | 0.0995             | -10.0503                     | T down vs N                            | 49.381  | 49.8749   | 16.1601    | 1         |
| cg02263813                                                                                      | MT1A;MT1A                  | 2.06E-05          | 2.06E-05             | 6.53078            | 6.53078                      | T up vs N                              | 35.333  | 32.9815   | 14.935     | 1         |
| cg02264895                                                                                      | ITGAX                      | 3.58E-06          | 3.58E-06             | 0.239997           | -4.16672                     | T down vs N                            | 47.604  | 19.076    | 6.41155    | 1         |
| PCDHGA4;PCDHGA11;PCDHGA11;PCD<br>HGA9;PCDHGA1;PCDHGB1;PCDHGB6;<br>PCDHGA12;PCDHGB3;PCDHGB7;PCDH |                            |                   |                      |                    |                              |                                        |         |           |            |           |
| cg02267483                                                                                      |                            | 1.97E-05          | 1.97E-05             | 4.32041            | 4.32041                      | T up vs N                              | 35.625  | 20.0566   | 9.00784    | 1         |
| cg02267756                                                                                      | SGK2;SGK2                  | 0.00140924        | 0.00140924           | 3.93611            | 3.93611                      | T up vs N                              | 14.838  | 17.5843   | 18.9611    | 1         |
| cg02269497                                                                                      | KLK6;KLK6;KLK6             | 0.00324737        | 0.00324737           | 0.283913           | -3.52221                     | T down vs N                            | 11.949  | 14.8482   | 19.8826    | 1         |
| cg02271275                                                                                      | AP2A2                      | 0.00030516        | 0.000305157          | 3.36851            | 3.36851                      | T up vs N                              | 21.021  | 13.8145   | 10.5151    | 1         |
| cg02272795                                                                                      | NOTCH3                     | 0.00051327        | 0.000513274          | 0.276429           | -3.61757                     | T down vs N                            | 18.782  | 15.485    | 13.1917    | 1         |
| cg02273041                                                                                      | PRKCDPB                    | 8.53E-05          | 8.53E-05             | 8.48125            | 8.48125                      | T up vs N                              | 27.178  | 42.8074   | 25.2014    | 1         |
| cg02273922                                                                                      | ACSL5;ACSL5;ACSL5;ACSL5    | 8.10E-08          | 8.10E-08             | 0.285455           | -3.50318                     | T down vs N                            | 85.461  | 14.7207   | 2.75601    | 1         |
| cg02274550                                                                                      | ACTG2                      | 6.03E-05          | 6.03E-05             | 0.315948           | -3.16508                     | T down vs N                            | 29.034  | 12.4337   | 6.85204    | 1         |
| cg02276070                                                                                      | ARSI                       | 0.00156126        | 0.00156126           | 0.281848           | -3.54802                     | T down vs N                            | 14.466  | 15.0209   | 16.6133    | 1         |
| cg02278114                                                                                      | KLK5;KLK5;KLK5             | 2.19E-05          | 2.19E-05             | 0.279023           | -3.58394                     | T down vs N                            | 34.947  | 15.2608   | 6.9869     | 1         |
| cg02280532                                                                                      | LY75;LY75                  | 0.00118176        | 0.00118176           | 10.7637            | 10.7637                      | T up vs N                              | 15.489  | 52.8835   | 54.6283    | 1         |
| cg02282833                                                                                      | NPR3                       | 6.95E-06          | 6.95E-06             | 0.284212           | -3.51851                     | T down vs N                            | 42.628  | 14.8234   | 5.56386    | 1         |
| cg02283106                                                                                      | CA5B                       | 0.00307446        | 0.00307446           | 6.6156             | 6.6156                       | T up vs N                              | 12.129  | 33.4367   | 44.1099    | 1         |
| cg02286081                                                                                      | HLA-DPB1                   | 0.00040591        | 0.00040591           | 0.203458           | -4.91502                     | T down vs N                            | 19.774  | 23.747    | 19.2152    | 1         |
| cg02286091                                                                                      | BHMT;BHMT                  | 9.89E-06          | 9.89E-06             | 29.4964            | 29.4964                      | T up vs N                              | 40.147  | 107.273   | 42.7522    | 1         |
| cg02286717                                                                                      | SYNPO2L;SYNPO2L            | 1.24E-05          | 1.24E-05             | 0.131808           | -7.5868                      | T down vs N                            | 38.602  | 38.4606   | 15.9415    | 1         |
| cg02290684                                                                                      | ESPNL                      | 0.00521558        | 0.00521558           | 0.304395           | -3.2852                      | T down vs N                            | 10.445  | 13.2507   | 20.2971    | 1         |
| cg02291556                                                                                      | PDZK1IP1                   | 4.63E-05          | 4.63E-05             | 0.288781           | -3.46283                     | T down vs N                            | 30.505  | 14.4499   | 7.57913    | 1         |
| cg02294302                                                                                      | FOX2;FOX2                  | 8.90E-07          | 8.90E-07             | 0.271197           | -3.68736                     | T down vs N                            | 59.473  | 15.9486   | 4.29062    | 1         |
| cg02295872                                                                                      | WNT9A                      | 0.00365428        | 0.00365428           | 0.290604           | -3.44111                     | T down vs N                            | 11.565  | 14.3039   | 19.7889    | 1         |
| MIR19A;MIR17HG;MIR92A1;MIR17HG<br>;MIR20A;MIR17;MIR19B1;MIR18A                                  |                            |                   |                      |                    |                              |                                        |         |           |            |           |
| cg02297838                                                                                      |                            | 4.42E-05          | 4.42E-05             | 0.19591            | -5.10439                     | T down vs N                            | 30.766  | 24.888    | 12.9432    | 1         |
| cg02298327                                                                                      | GKN2                       | 0.00103246        | 0.00103246           | 0.307317           | -3.25397                     | T down vs N                            | 15.998  | 13.0387   | 13.04      | 1         |
| cg02298472                                                                                      | WNT5A                      | 3.70E-06          | 3.70E-06             | 0.105866           | -9.44595                     | T down vs N                            | 47.329  | 47.2303   | 15.9665    | 1         |
| cg02303399                                                                                      | LELP1                      | 0.00073898        | 0.000738977          | 0.264115           | -3.78623                     | T down vs N                            | 17.299  | 16.602    | 15.3554    | 1         |
| cg02303677                                                                                      | TACR2                      | 0.00244714        | 0.00244714           | 0.291362           | -3.43216                     | T down vs N                            | 12.893  | 14.2436   | 17.6766    | 1         |
| cg02305164                                                                                      | ATP8B3                     | 0.00065286        | 0.000652859          | 0.252943           | -3.95346                     | T down vs N                            | 17.795  | 17.6973   | 15.9121    | 1         |
| cg02306493                                                                                      | FARSA                      | 0.00520184        | 0.00520184           | 0.241464           | -4.14141                     | T down vs N                            | 10.454  | 18.9135   | 28.9489    | 1         |
| cg02307277                                                                                      | IYD;IYD;IYD;IYD;IYD;IYD    | 6.10E-05          | 6.10E-05             | 0.220816           | -4.52865                     | T down vs N                            | 28.976  | 21.3678   | 11.799     | 1         |
| cg02308226                                                                                      | EIF5B                      | 0.00163892        | 0.00163892           | 0.329043           | -3.03912                     | T down vs N                            | 14.292  | 11.5727   | 12.9558    | 1         |
| cg02308798                                                                                      | C2orf67                    | 3.84E-05          | 3.84E-05             | 0.317366           | -3.15093                     | T down vs N                            | 31.581  | 12.3372   | 6.25037    | 1         |
| cg02309029                                                                                      | FPR2;FPR2                  | 0.00054859        | 0.000548591          | 0.137365           | -7.27987                     | T down vs N                            | 18.506  | 36.909    | 31.9117    | 1         |

| Probeset ID | UCSC_REFGENE_NAME                                                                               | p-value<br>(Type) | p-value (T vs.<br>N) | Ratio (T<br>vs. N) | Fold-<br>Change (T<br>vs. N) | Fold-Change (T vs.<br>N) (Description) | F(Type) | SS (Type) | SS (Error) | F (Error) |
|-------------|-------------------------------------------------------------------------------------------------|-------------------|----------------------|--------------------|------------------------------|----------------------------------------|---------|-----------|------------|-----------|
| cg02310296  | MMP9                                                                                            | 0.00073786        | 0.000737861          | 0.327907           | -3.04965                     | T down vs N                            | 17.305  | 11.6448   | 10.7667    | 1         |
| cg02311163  | SEMG2                                                                                           | 0.00052581        | 0.000525811          | 0.313196           | -3.19289                     | T down vs N                            | 18.681  | 12.6233   | 10.8116    | 1         |
| cg02311374  | ITGAX                                                                                           | 0.00555401        | 0.00555401           | 0.320554           | -3.1196                      | T down vs N                            | 10.253  | 12.1233   | 18.9187    | 1         |
| cg02311588  | RNF222                                                                                          | 0.00213424        | 0.00213424           | 0.262975           | -3.80265                     | T down vs N                            | 13.362  | 16.71     | 20.0091    | 1         |
| cg02313331  | SLC7A5P1                                                                                        | 0.00396859        | 0.00396859           | 4.88831            | 4.88831                      | T up vs N                              | 11.301  | 23.5848   | 33.3923    | 1         |
| cg02313492  | CDH4                                                                                            | 0.00015165        | 0.000151646          | 0.246643           | -4.05445                     | T down vs N                            | 24.276  | 18.3528   | 12.096     | 1         |
| cg02317832  | ASB18                                                                                           | 3.29E-06          | 3.29E-06             | 0.164584           | -6.07591                     | T down vs N                            | 48.253  | 30.4926   | 10.111     | 1         |
| cg02318139  | ST8SIA4;ST8SIA4                                                                                 | 0.00037331        | 0.000373312          | 3.69371            | 3.69371                      | T up vs N                              | 20.135  | 15.9907   | 12.707     | 1         |
| cg02318454  | CYP11B1;CYP11B1                                                                                 | 1.82E-05          | 1.82E-05             | 0.227472           | -4.39615                     | T down vs N                            | 36.125  | 20.5359   | 9.09554    | 1         |
| cg02322373  | VAX2                                                                                            | 0.00035099        | 0.000350985          | 0.325801           | -3.06936                     | T down vs N                            | 20.403  | 11.7797   | 9.2375     | 1         |
| cg02327530  | C7orf51                                                                                         | 0.00128224        | 0.00128224           | 0.329576           | -3.0342                      | T down vs N                            | 15.186  | 11.5389   | 12.1579    | 1         |
| cg02327997  | ADAM12;ADAM12                                                                                   | 0.00140446        | 0.00140446           | 6.58235            | 6.58235                      | T up vs N                              | 14.851  | 33.2586   | 35.8326    | 1         |
| cg02331883  | PCDHGA4;PCDHGA9;PCDHGA1;PCDHG<br>B1;PCDHGB7;PCDHGB6;PCDHGB3;PCD<br>HGA6;PCDHGA8;PCDHGA10;PCDHGA | 0.00021141        | 0.00021141           | 3.73252            | 3.73252                      | T up vs N                              | 22.693  | 16.2475   | 11.4555    | 1         |
|             | S100A13;S100A13;S100A1;S100A13;S                                                                |                   |                      |                    |                              |                                        |         |           |            |           |
| cg02331910  | 100A13;S100A13                                                                                  | 7.85E-05          | 7.85E-05             | 7.68683            | 7.68683                      | T up vs N                              | 27.621  | 38.9594   | 22.5679    | 1         |
| cg02332073  | TSGA13                                                                                          | 5.53E-05          | 5.53E-05             | 0.25012            | -3.99808                     | T down vs N                            | 29.517  | 17.9875   | 9.7505     | 1         |
| cg02332123  | OR2M5                                                                                           | 5.90E-05          | 5.90E-05             | 0.195984           | -5.10246                     | T down vs N                            | 29.159  | 24.8765   | 13.65      | 1         |
| cg02332206  | MAP4;MAP4;MAP4;MAP4                                                                             | 4.15E-05          | 4.15E-05             | 3.17688            | 3.17688                      | T up vs N                              | 31.131  | 12.5141   | 6.43168    | 1         |
| cg02332491  | SLC38A4;SLC38A4                                                                                 | 1.03E-05          | 1.03E-05             | 0.212616           | -4.70331                     | T down vs N                            | 39.858  | 22.4519   | 9.01272    | 1         |
| cg02332537  | RTP3                                                                                            | 4.10E-06          | 4.10E-06             | 0.293372           | -3.40864                     | T down vs N                            | 46.544  | 14.0852   | 4.84193    | 1         |
| cg02333517  | EFHB;EFHB                                                                                       | 2.85E-06          | 8.00E-06             | 0.285384           | -3.50405                     | T down vs N                            | 49.395  | 14.7265   | 4.7702     | 1         |
| cg02335306  | KCNQ1;KCNQ1                                                                                     | 0.00141553        | 0.00141553           | 0.273443           | -3.65706                     | T down vs N                            | 14.822  | 15.7476   | 16.9992    | 1         |
| cg02335533  | PTHLH;PTHLH;PTHLH;PTHLH                                                                         | 0.00012073        | 0.000120734          | 0.197961           | -5.05149                     | T down vs N                            | 25.402  | 24.5709   | 15.4767    | 1         |
| cg02335631  | LOC340094                                                                                       | 0.00030154        | 0.000301541          | 0.26923            | -3.71429                     | T down vs N                            | 21.074  | 16.127    | 12.2443    | 1         |
| cg02336334  | MIR518A2                                                                                        | 8.00E-06          | 8.00E-06             | 0.174529           | -5.72972                     | T down vs N                            | 41.622  | 28.542    | 10.9718    | 1         |
| cg02337436  | EBF3                                                                                            | 9.82E-05          | 9.82E-05             | 0.127484           | -7.84409                     | T down vs N                            | 26.448  | 39.737    | 24.0393    | 1         |
| cg02339243  | ACTL9                                                                                           | 1.34E-05          | 1.34E-05             | 0.27431            | -3.64551                     | T down vs N                            | 38.105  | 15.6708   | 6.58004    | 1         |
| cg02340615  | TXNRD1                                                                                          | 1.95E-05          | 1.95E-05             | 0.199371           | -5.01577                     | T down vs N                            | 35.68   | 24.3561   | 10.9221    | 1         |
| cg02341571  | PATL2                                                                                           | 1.24E-05          | 1.24E-05             | 0.294988           | -3.38997                     | T down vs N                            | 38.59   | 13.9593   | 5.78781    | 1         |
| cg02344868  | NCCRP1                                                                                          | 0.00311758        | 0.00311758           | 0.297577           | -3.36047                     | T down vs N                            | 12.083  | 13.7602   | 18.2215    | 1         |
| cg02345417  | PPP2R1B;PPP2R1B                                                                                 | 0.00016005        | 0.000160047          | 3.50944            | 3.50944                      | T up vs N                              | 24.015  | 14.7627   | 9.83577    | 1         |
| cg02345961  | BRUNOL4;BRUNOL4;BRUNOL4;BRUN<br>OL4                                                             | 1.96E-06          | 1.96E-06             | 4.2928             | 4.2928                       | T up vs N                              | 52.49   | 19.8813   | 6.06021    | 1         |
|             | NTN1                                                                                            |                   |                      |                    |                              |                                        |         |           |            |           |
| cg02346492  | NTN1                                                                                            | 6.46E-06          | 6.46E-06             | 19.8571            | 19.8571                      | T up vs N                              | 43.156  | 83.6539   | 31.0142    | 1         |
| cg02346730  | HCG26                                                                                           | 0.00020936        | 0.000209355          | 0.260697           | -3.83588                     | T down vs N                            | 22.739  | 16.9285   | 11.9117    | 1         |
| cg02347881  | LOC144776                                                                                       | 0.00030678        | 0.000306784          | 0.253711           | -3.94149                     | T down vs N                            | 20.997  | 17.6194   | 13.4263    | 1         |
| cg02348751  | MGC45800                                                                                        | 6.36E-06          | 6.36E-06             | 54.5147            | 54.5147                      | T up vs N                              | 43.27   | 149.744   | 55.3716    | 1         |
| cg02349866  | AP3S2;AP3S2                                                                                     | 0.00016403        | 0.000164025          | 0.294074           | -3.4005                      | T down vs N                            | 23.896  | 14.0304   | 9.3942     | 1         |
| cg02354839  | BTF3;BTF3                                                                                       | 0.00314801        | 0.00314801           | 0.295436           | -3.38483                     | T down vs N                            | 12.331  | 13.1056   | 15.9422    | 1         |
| cg02355558  | CTDSPL;CTDSPL                                                                                   | 6.02E-06          | 6.02E-06             | 0.286676           | -3.48826                     | T down vs N                            | 43.667  | 14.6206   | 5.35715    | 1         |
| cg02358755  | ATP6V1G2;ATP6V1G2                                                                               | 0.00022686        | 0.000226861          | 0.269703           | -3.70778                     | T down vs N                            | 22.366  | 16.0839   | 11.5062    | 1         |
| cg02359511  | UFSP2;UFSP2                                                                                     | 4.40E-05          | 4.40E-05             | 0.207343           | -4.82293                     | T down vs N                            | 30.799  | 23.1862   | 12.0453    | 1         |
| cg02365220  | SLC27A2;SLC27A2                                                                                 | 0.00226892        | 0.00226892           | 0.302915           | -3.30126                     | T down vs N                            | 13.151  | 13.3595   | 16.2537    | 1         |
| cg02367655  | RASAL2;LOC100302401                                                                             | 1.24E-06          | 1.24E-06             | 0.306677           | -3.26076                     | T down vs N                            | 56.431  | 13.0848   | 3.70994    | 1         |
| cg02367992  | LOC100294362                                                                                    | 0.00016667        | 0.000166665          | 0.076516           | -13.0692                     | T down vs N                            | 23.819  | 61.8751   | 41.5629    | 1         |
| cg02368591  | MMP12                                                                                           | 0.00041142        | 0.000411424          | 0.286959           | -3.48481                     | T down vs N                            | 19.716  | 14.5975   | 11.8464    | 1         |
| cg02370478  | MORC4;MORC4                                                                                     | 1.25E-05          | 1.25E-05             | 0.254369           | -3.9313                      | T down vs N                            | 38.566  | 17.5529   | 7.28223    | 1         |
| cg02371631  | CDK15                                                                                           | 0.00312742        | 0.00312742           | 0.306502           | -3.26262                     | T down vs N                            | 12.072  | 13.0974   | 17.3587    | 1         |
| cg02371798  | HOTAIR                                                                                          | 3.46E-05          | 3.46E-05             | 0.321031           | -3.11496                     | T down vs N                            | 32.181  | 12.0916   | 6.01177    | 1         |
| cg02372702  | CASC1;CASC1;CASC1                                                                               | 0.00017562        | 0.00017562           | 0.308954           | -3.23673                     | T down vs N                            | 23.569  | 12.9215   | 8.77205    | 1         |
| cg02372786  | SIX3                                                                                            | 3.63E-06          | 3.63E-06             | 0.104643           | -9.55633                     | T down vs N                            | 47.495  | 47.7203   | 16.0759    | 1         |
| cg02374107  | ADCY9                                                                                           | 1.21E-06          | 1.21E-06             | 0.257235           | -3.8875                      | T down vs N                            | 60.505  | 16.2511   | 4.02886    | 1         |
| cg02374944  | MAN2A2                                                                                          | 0.0002192         | 0.000219201          | 0.286288           | -3.49298                     | T down vs N                            | 22.525  | 14.6523   | 10.408     | 1         |
| cg02375251  | CHST10                                                                                          | 0.00185923        | 0.00185923           | 0.267193           | -3.74261                     | T down vs N                            | 13.844  | 16.3143   | 18.8554    | 1         |
| cg02376143  | WDR90                                                                                           | 0.00012362        | 0.000123616          | 0.274495           | -3.64306                     | T down vs N                            | 25.284  | 15.6545   | 9.90649    | 1         |
| cg02376703  | EPHA1                                                                                           | 0.00020995        | 0.000209945          | 25.4967            | 25.4967                      | T up vs N                              | 22.726  | 98.2342   | 69.1621    | 1         |
| cg02380334  | C14orf162                                                                                       | 5.71E-05          | 5.71E-05             | 0.130803           | -7.64507                     | T down vs N                            | 29.335  | 38.7516   | 21.1364    | 1         |
| cg02381385  | SIGLEC12                                                                                        | 0.00096711        | 0.000967114          | 0.318795           | -3.13681                     | T down vs N                            | 16.248  | 12.2408   | 12.0538    | 1         |
| cg02382795  | MLXIPL;MLXIPL;MLXIPL;MLXIPL                                                                     | 0.00013728        | 0.000137281          | 0.279074           | -3.58328                     | T down vs N                            | 24.764  | 15.2564   | 9.85737    | 1         |
| cg02383173  | PDLIM5;PDLIM5;PDLIM5;PDLIM5;PDLI<br>M5                                                          | 3.59E-05          | 3.59E-05             | 0.26777            | -3.73455                     | T down vs N                            | 31.967  | 16.261    | 8.139      | 1         |
|             | TLE2                                                                                            |                   |                      |                    |                              |                                        |         |           |            |           |
| cg02383835  | TLE2                                                                                            | 0.00076122        | 0.00076122           | 0.177462           | -5.63502                     | T down vs N                            | 18.326  | 24.8885   | 19.0136    | 1         |
| cg02384338  | GPRC5B                                                                                          | 6.75E-06          | 6.75E-06             | 6.52427            | 6.52427                      | T up vs N                              | 42.836  | 32.9465   | 12.3062    | 1         |
| cg02387612  | OR8H3                                                                                           | 1.34E-05          | 1.34E-05             | 0.25265            | -3.95805                     | T down vs N                            | 38.084  | 17.7272   | 7.44769    | 1         |
| cg02387639  | USP13                                                                                           | 0.00225893        | 0.00225893           | 0.252245           | -3.9644                      | T down vs N                            | 13.166  | 17.7686   | 21.5931    | 1         |
| cg02388882  | AGAP11                                                                                          | 4.50E-05          | 4.50E-05             | 3.52267            | 3.52267                      | T up vs N                              | 30.669  | 14.8513   | 7.74791    | 1         |
| cg02389634  | MIR2117                                                                                         | 2.95E-06          | 2.95E-06             | 0.248556           | -4.02323                     | T down vs N                            | 49.11   | 18.1507   | 5.91351    | 1         |
| cg02389877  | FEM1B                                                                                           | 0.00071339        | 0.000713385          | 0.278941           | -3.58498                     | T down vs N                            | 17.439  | 15.2678   | 14.0078    | 1         |
| cg02390319  | PRDM16;PRDM16                                                                                   | 0.00118742        | 0.00118742           | 8.77777            | 8.77777                      | T up vs N                              | 15.471  | 44.1947   | 45.7055    | 1         |

| Probeset ID | UCSC_REFGENE_NAME                                                                       | p-value<br>(Type) | p-value (T vs.<br>N) | Ratio (T<br>vs. N) | Fold-<br>Change (T<br>vs. N) | Fold-Change (T vs.<br>N) (Description) | F(Type) | SS (Type) | SS (Error) | F (Error) |
|-------------|-----------------------------------------------------------------------------------------|-------------------|----------------------|--------------------|------------------------------|----------------------------------------|---------|-----------|------------|-----------|
| cg02391549  | MUC16;MUC16                                                                             | 0.00018157        | 0.000181574          | 0.136572           | -7.32213                     | T down vs N                            | 23.41   | 37.1245   | 25.3738    | 1         |
| cg02393380  | SDCBP2                                                                                  | 9.71E-05          | 9.71E-05             | 0.231857           | -4.313                       | T down vs N                            | 26.51   | 20.0096   | 12.0769    | 1         |
| cg02393756  | VAPA;VAPA                                                                               | 5.74E-05          | 5.74E-05             | 0.249779           | -4.00353                     | T down vs N                            | 29.306  | 18.0229   | 9.84004    | 1         |
| cg02394186  | KCNAB2;KCNAB2                                                                           | 0.00099003        | 0.000990025          | 0.285997           | -3.49654                     | T down vs N                            | 16.159  | 14.6762   | 14.5322    | 1         |
| cg02394955  | PPYR1                                                                                   | 0.0001834         | 0.000183401          | 13.393             | 13.393                       | T up vs N                              | 23.362  | 63.0588   | 43.1871    | 1         |
| cg02395581  | ASB4;ASB4                                                                               | 1.35E-06          | 1.35E-06             | 0.220527           | -4.53458                     | T down vs N                            | 55.701  | 21.4048   | 6.14849    | 1         |
| cg02396224  | CASZ1                                                                                   | 0.00416465        | 0.00416465           | 4.08242            | 4.08242                      | T up vs N                              | 11.148  | 18.5335   | 26.6013    | 1         |
| cg02397205  | NOS1                                                                                    | 1.64E-05          | 1.64E-05             | 0.212516           | -4.70553                     | T down vs N                            | 36.798  | 22.4656   | 9.76816    | 1         |
| cg02398482  | ULBP2                                                                                   | 1.29E-06          | 1.29E-06             | 0.262798           | -3.8052                      | T down vs N                            | 56.088  | 16.7269   | 4.7716     | 1         |
| cg02399098  | AVIL                                                                                    | 0.00047945        | 0.000479453          | 0.237739           | -4.20629                     | T down vs N                            | 19.067  | 19.3296   | 16.2207    | 1         |
| cg02400773  | HS3ST3A1                                                                                | 1.70E-05          | 1.70E-05             | 0.121815           | -8.2092                      | T down vs N                            | 36.562  | 41.5118   | 18.1661    | 1         |
| cg02400942  | CSPG4                                                                                   | 0.00037148        | 0.000371476          | 0.299062           | -3.34378                     | T down vs N                            | 20.156  | 13.6474   | 10.8334    | 1         |
| cg02408311  | OR51B5                                                                                  | 0.00716167        | 0.00716167           | 0.250481           | -3.99231                     | T down vs N                            | 9.4915  | 17.9501   | 30.2588    | 1         |
| cg02409177  | ADRA1A;ADRA1A;ADRA1A;ADRA1A                                                             | 0.00048165        | 0.000481647          | 4.34498            | 4.34498                      | T up vs N                              | 19.047  | 20.2124   | 16.9786    | 1         |
| cg02413370  | C22orf41                                                                                | 7.78E-06          | 7.78E-06             | 0.242113           | -4.13031                     | T down vs N                            | 41.82   | 18.8421   | 7.20888    | 1         |
| cg02415020  | SMYD3;SMYD3                                                                             | 2.82E-05          | 2.82E-05             | 0.208655           | -4.7926                      | T down vs N                            | 33.403  | 23.0007   | 11.0172    | 1         |
| cg02415057  | GLIPR1L2                                                                                | 0.00233136        | 0.00233136           | 0.265334           | -3.76884                     | T down vs N                            | 13.058  | 16.4873   | 20.202     | 1         |
| cg02415125  | C19orf77                                                                                | 0.00022527        | 0.000225273          | 0.170964           | -5.84919                     | T down vs N                            | 22.398  | 29.2208   | 20.8738    | 1         |
| cg02415341  | CALY                                                                                    | 4.46E-05          | 4.46E-05             | 0.324206           | -3.08446                     | T down vs N                            | 30.725  | 11.883    | 6.18814    | 1         |
| cg02417084  | SALL1;SALL1                                                                             | 0.00011413        | 0.000114129          | 0.229941           | -4.34893                     | T down vs N                            | 25.685  | 20.2374   | 12.6068    | 1         |
| cg02419920  | SLC10A4                                                                                 | 2.73E-07          | 2.73E-07             | 0.262488           | -3.8097                      | T down vs N                            | 71.31   | 16.7565   | 3.75968    | 1         |
| cg02421734  | LILRB4;LILRB4                                                                           | 0.00328728        | 0.00328728           | 0.21351            | -4.68363                     | T down vs N                            | 11.909  | 22.3304   | 30.002     | 1         |
| cg02423105  | CDH26;CDH26                                                                             | 0.00064014        | 0.000640141          | 0.306947           | -3.25789                     | T down vs N                            | 17.875  | 13.0653   | 11.6951    | 1         |
| cg02427468  | ESYT2                                                                                   | 0.00010192        | 0.000101923          | 0.257856           | -3.87814                     | T down vs N                            | 26.259  | 17.2055   | 10.4835    | 1         |
| cg02427831  | SIGLEC8                                                                                 | 0.00183827        | 0.00183827           | 0.303684           | -3.2929                      | T down vs N                            | 13.884  | 13.3028   | 15.3306    | 1         |
| cg02431260  | ESAM                                                                                    | 0.00343692        | 0.00343692           | 4.81153            | 4.81153                      | T up vs N                              | 11.764  | 23.1165   | 31.4412    | 1         |
| cg02431972  | CBFA2T3                                                                                 | 0.00345393        | 0.00345393           | 0.253604           | -3.94315                     | T down vs N                            | 11.748  | 17.6302   | 24.0119    | 1         |
| cg02434121  | PAPOLB;RADIL                                                                            | 0.00125268        | 0.00125268           | 4.08952            | 4.08952                      | T up vs N                              | 15.272  | 18.5793   | 19.4651    | 1         |
| cg02435427  | AKR1C4                                                                                  | 4.84E-05          | 4.84E-05             | 0.254773           | -3.92507                     | T down vs N                            | 30.26   | 17.5123   | 9.25977    | 1         |
| cg02439266  | HOXA3;HOXA3;HOXA3                                                                       | 1.83E-05          | 1.83E-05             | 9.70299            | 9.70299                      | T up vs N                              | 36.086  | 48.3665   | 21.4451    | 1         |
| cg02440562  | SPATA21                                                                                 | 3.73E-05          | 3.73E-05             | 0.157812           | -6.33666                     | T down vs N                            | 31.739  | 31.9294   | 16.0962    | 1         |
| cg02441711  | SECTM1                                                                                  | 0.00660692        | 0.00660692           | 3.40744            | 3.40744                      | T up vs N                              | 9.7302  | 14.0772   | 23.1481    | 1         |
| cg02444484  | PDE6C                                                                                   | 2.47E-06          | 2.47E-06             | 0.167539           | -5.96876                     | T down vs N                            | 50.548  | 29.8942   | 9.46242    | 1         |
| cg02444978  | ISPD;ISPD                                                                               | 0.00153974        | 0.00153974           | 0.273751           | -3.65296                     | T down vs N                            | 14.517  | 15.7203   | 17.3269    | 1         |
| cg02447227  | NFIA;NFIA;NFIA;NFIA                                                                     | 0.00553004        | 0.00553004           | 0.331086           | -3.02036                     | T down vs N                            | 10.266  | 11.4441   | 17.8359    | 1         |
| cg02447370  | HS6ST2;HS6ST2                                                                           | 1.95E-06          | 1.95E-06             | 0.3005             | -3.32779                     | T down vs N                            | 52.523  | 13.5392   | 4.12445    | 1         |
| cg02447462  | CFD                                                                                     | 4.74E-06          | 4.74E-06             | 0.085182           | -11.7395                     | T down vs N                            | 45.443  | 56.8169   | 20.0047    | 1         |
| cg02449103  | C6orf47                                                                                 | 5.47E-05          | 5.47E-05             | 0.152497           | -6.5575                      | T down vs N                            | 29.574  | 33.1252   | 17.9212    | 1         |
| cg02449166  | EBF3                                                                                    | 2.88E-05          | 2.88E-05             | 0.272012           | -3.67631                     | T down vs N                            | 33.275  | 15.8753   | 7.63352    | 1         |
| cg02449336  | OR2A2                                                                                   | 3.44E-05          | 3.44E-05             | 0.208557           | -4.79485                     | T down vs N                            | 32.226  | 23.0144   | 11.4264    | 1         |
| cg02449821  | CPNE7;CPNE7                                                                             | 0.00187295        | 0.00187295           | 7.54046            | 7.54046                      | T up vs N                              | 13.818  | 38.2284   | 44.2656    | 1         |
| cg02450267  | MOG;MOG;MOG;MOG;MOG;MOG;MOG                                                             | 0.00072389        | 0.000723893          | 4.78317            | 4.78317                      | T up vs N                              | 17.381  | 22.9429   | 21.1201    | 1         |
| cg02451670  | INTS7;DTL                                                                               | 3.93E-05          | 3.93E-05             | 0.271564           | -3.68238                     | T down vs N                            | 31.445  | 15.9156   | 8.09838    | 1         |
| cg02452732  | IFI35                                                                                   | 0.0020964         | 0.0020964            | 0.289619           | -3.45281                     | T down vs N                            | 13.424  | 14.3825   | 17.1426    | 1         |
| cg02452944  | PCDHGA4;PCDHGA11;PCDHGA11;PCDHGA9;PCDHGA1;PCDHGB1;PCDHGB6;PCDHGA12;PCDHGB3;PCDHGB7;PCDH | 0.00127315        | 0.00127315           | 5.14548            | 5.14548                      | T up vs N                              | 15.212  | 25.1335   | 26.4357    | 1         |
| cg02452966  | RYR1;RYR1                                                                               | 0.0031428         | 0.0031428            | 3.73273            | 3.73273                      | T up vs N                              | 12.056  | 16.2489   | 21.5644    | 1         |
| cg02456218  | BTNL9                                                                                   | 2.86E-05          | 2.86E-05             | 0.272966           | -3.66347                     | T down vs N                            | 33.323  | 15.7901   | 7.58163    | 1         |
| cg02458062  | HOXB3                                                                                   | 0.00658652        | 0.00658652           | 3.49154            | 3.49154                      | T up vs N                              | 9.7394  | 14.6426   | 24.0552    | 1         |
| cg02458237  | MYO15A                                                                                  | 0.00398162        | 0.00398162           | 3.27801            | 3.27801                      | T up vs N                              | 11.29   | 13.2019   | 18.7091    | 1         |
| cg02458516  | ZMAT4;ZMAT4                                                                             | 0.00037343        | 0.000373432          | 0.248585           | -4.02277                     | T down vs N                            | 20.133  | 18.1477   | 14.422     | 1         |
| cg02459415  | OR5L2                                                                                   | 1.14E-05          | 1.14E-05             | 0.232532           | -4.30049                     | T down vs N                            | 39.2    | 19.9301   | 8.13485    | 1         |
| cg02459818  | VN1R4                                                                                   | 0.00090929        | 0.000909293          | 0.33305            | -3.00255                     | T down vs N                            | 16.486  | 11.322    | 10.9884    | 1         |
| cg02463440  | PIWIL2;PIWIL2                                                                           | 0.00109613        | 0.00109613           | 4.7137             | 4.7137                       | T up vs N                              | 15.772  | 22.5159   | 22.842     | 1         |
| cg02465761  | DEFB1;DEFB1                                                                             | 0.0041022         | 0.0041022            | 0.324155           | -3.08495                     | T down vs N                            | 11.195  | 11.8864   | 16.9876    | 1         |
| cg02466246  | SARM1                                                                                   | 1.17E-05          | 1.17E-05             | 6.83132            | 6.83132                      | T up vs N                              | 39.01   | 34.582    | 14.1838    | 1         |
| cg02466572  | CYP26C1                                                                                 | 0.00043772        | 0.000437715          | 0.281617           | -3.55093                     | T down vs N                            | 19.451  | 15.0404   | 12.3717    | 1         |
| cg02467692  | UGT1A6;UGT1A6;UGT1A3;UGT1A5;UGT1A4;UGT1A9;UGT1A10;UGT1A7;UGT1A1;UGT1A8                  | 0.0010607         | 0.0010607            | 0.281921           | -3.54709                     | T down vs N                            | 15.896  | 15.0147   | 15.113     | 1         |
| cg02467899  | SLC38A10;SLC38A10                                                                       | 4.66E-05          | 4.66E-05             | 0.2756             | -3.62844                     | T down vs N                            | 30.475  | 15.5573   | 8.16785    | 1         |
| cg02468250  | PAX6;PAX6;PAX6                                                                          | 9.42E-05          | 9.42E-05             | 6.00505            | 6.00505                      | T up vs N                              | 26.664  | 30.0974   | 18.0604    | 1         |
| cg02468320  | CACNA1C;CACNA1C;CACNA1C;CACNA1C;CACNA1C;CACNA1C;CACNA1C;CACNA1C                         | 0.00213435        | 0.00213435           | 0.31266            | -3.19836                     | T down vs N                            | 13.362  | 12.6605   | 15.1603    | 1         |
| cg02469067  | KIR3DL1                                                                                 | 0.00010309        | 0.000103087          | 0.23988            | -4.16876                     | T down vs N                            | 26.201  | 19.0891   | 11.6569    | 1         |
| cg02469604  | TKTL1;TKTL1;TKTL1                                                                       | 6.64E-06          | 6.64E-06             | 0.186579           | -5.35965                     | T down vs N                            | 42.948  | 26.4004   | 9.83542    | 1         |

| Probeset ID                      | UCSC_REFGENE_NAME      | p-value<br>(Type) | p-value (T vs.<br>N) | Ratio (T<br>vs. N) | Fold-<br>Change (T<br>vs. N) | Fold-Change (T vs.<br>N) (Description) | F(Type) | SS (Type) | SS (Error) | F (Error) |
|----------------------------------|------------------------|-------------------|----------------------|--------------------|------------------------------|----------------------------------------|---------|-----------|------------|-----------|
| cg02471310                       | BMPR1B                 | 0.00107095        | 0.00107095           | 0.326898           | -3.05906                     | T down vs N                            | 15.86   | 11.7092   | 11.813     | 1         |
| cg02471507                       | CHMP4C;CHMP4C          | 0.00028068        | 0.000280679          | 5.47902            | 5.47902                      | T up vs N                              | 21.395  | 27.0977   | 20.265     | 1         |
| cg02471915                       | LOC646851              | 4.82E-05          | 4.82E-05             | 0.314346           | -3.18121                     | T down vs N                            | 30.284  | 12.5437   | 6.6273     | 1         |
| cg02474858                       | ASCC2                  | 1.03E-05          | 1.03E-05             | 0.293138           | -3.41136                     | T down vs N                            | 39.887  | 14.1036   | 5.65746    | 1         |
| cg02475374                       | XKR6                   | 8.24E-06          | 8.24E-06             | 0.191749           | -5.21515                     | T down vs N                            | 41.411  | 25.5479   | 9.87103    | 1         |
| cg02476374                       | CACNA1H;CACNA1H        | 1.37E-05          | 1.37E-05             | 0.184889           | -5.40864                     | T down vs N                            | 37.946  | 26.6873   | 11.2528    | 1         |
| cg02478603                       | CD1B                   | 3.60E-06          | 3.60E-06             | 0.20693            | -4.83255                     | T down vs N                            | 47.542  | 23.245    | 7.82304    | 1         |
| FCAR;FCAR;FCAR;FCAR;FCAR;FCAR;FC |                        |                   |                      |                    |                              |                                        |         |           |            |           |
| cg02478708                       | AR;FCAR                | 0.00012173        | 0.000121732          | 0.204014           | -4.90163                     | T down vs N                            | 25.361  | 23.6657   | 14.9308    | 1         |
| cg02478907                       | BAI1                   | 1.97E-05          | 1.97E-05             | 3.45585            | 3.45585                      | T up vs N                              | 35.62   | 14.403    | 6.46962    | 1         |
| cg02479773                       | LRRC14                 | 0.00256192        | 0.00256192           | 3.90058            | 3.90058                      | T up vs N                              | 12.737  | 17.3523   | 21.7971    | 1         |
| cg02480772                       | PRKDC;PRKDC            | 0.00141771        | 0.00141771           | 0.331139           | -3.01988                     | T down vs N                            | 14.816  | 11.4408   | 12.3548    | 1         |
| cg02481528                       | RBPJL                  | 0.00033696        | 0.000336963          | 3.7293             | 3.7293                       | T up vs N                              | 20.582  | 16.2263   | 12.6139    | 1         |
| cg02481697                       | NTN1                   | 0.00015334        | 0.000153343          | 0.199175           | -5.02072                     | T down vs N                            | 24.222  | 24.3859   | 16.1083    | 1         |
| cg02483029                       | KIAA0146               | 0.00306097        | 0.00306097           | 0.285913           | -3.49757                     | T down vs N                            | 12.143  | 14.6831   | 19.3469    | 1         |
| cg02483931                       | CCL5                   | 1.28E-06          | 1.28E-06             | 0.162161           | -6.1667                      | T down vs N                            | 56.188  | 30.996    | 8.82635    | 1         |
| cg02487061                       | C1orf52;C1orf52        | 0.0006902         | 0.0006902            | 0.238967           | -4.18468                     | T down vs N                            | 17.571  | 19.1912   | 17.475     | 1         |
| cg02487233                       | CD47;CD47;CD47         | 2.21E-06          | 2.21E-06             | 4.70983            | 4.70983                      | T up vs N                              | 51.485  | 22.4921   | 6.98987    | 1         |
| cg02489377                       | OR1B1                  | 4.96E-06          | 4.96E-06             | 0.27776            | -3.60023                     | T down vs N                            | 45.101  | 15.3695   | 5.45242    | 1         |
| cg02489908                       | SLC16A11               | 2.36E-05          | 7.96E-05             | 5.86995            | 5.86995                      | T up vs N                              | 34.478  | 29.3382   | 13.615     | 1         |
| cg02490736                       | FOXF2                  | 0.00081684        | 0.00081684           | 0.333188           | -3.00131                     | T down vs N                            | 16.903  | 11.3135   | 10.7088    | 1         |
| cg02491003                       | ARF4                   | 0.00042206        | 0.000422063          | 0.252764           | -3.95626                     | T down vs N                            | 19.607  | 17.7156   | 14.4569    | 1         |
| cg02493167                       | OTP                    | 4.13E-05          | 4.13E-05             | 0.254677           | -3.92654                     | T down vs N                            | 31.156  | 17.5219   | 8.99835    | 1         |
| cg02493798                       | ALOX12                 | 1.02E-05          | 1.02E-05             | 4.99644            | 4.99644                      | T up vs N                              | 39.919  | 24.2396   | 9.71564    | 1         |
| cg02494703                       | MIR194-2;MIR192        | 0.00498171        | 0.00498171           | 0.321673           | -3.10874                     | T down vs N                            | 10.587  | 12.0491   | 18.21      | 1         |
| cg02494904                       | SMOX;SMOX;SMOX;SMOX    | 4.98E-06          | 4.98E-06             | 0.240716           | -4.15427                     | T down vs N                            | 45.07   | 18.9962   | 6.74377    | 1         |
| cg02495306                       | MXRA5                  | 0.00012891        | 0.000128909          | 0.125783           | -7.95022                     | T down vs N                            | 25.075  | 40.2572   | 25.6877    | 1         |
| cg02497486                       | SLC7A1                 | 7.96E-05          | 7.96E-05             | 0.263795           | -3.79082                     | T down vs N                            | 27.546  | 16.6322   | 9.66068    | 1         |
| cg02497558                       | HOBX1                  | 2.59E-05          | 2.59E-05             | 5.08243            | 5.08243                      | T up vs N                              | 33.914  | 24.7566   | 11.6799    | 1         |
| cg02497559                       | FBF1                   | 0.00028365        | 0.000283651          | 0.323711           | -3.08918                     | T down vs N                            | 21.347  | 11.9153   | 8.93062    | 1         |
| cg02499308                       | ACMSD                  | 0.00035963        | 0.000359634          | 0.121682           | -8.21813                     | T down vs N                            | 20.297  | 41.5547   | 32.7572    | 1         |
| cg02499640                       | PDE4D;PDE4D            | 0.00037465        | 0.00037465           | 0.197272           | -5.06914                     | T down vs N                            | 20.119  | 24.6769   | 19.6245    | 1         |
| cg02499925                       | OR1G1                  | 7.23E-07          | 7.23E-07             | 0.152125           | -6.57356                     | T down vs N                            | 61.423  | 33.2115   | 8.65125    | 1         |
| cg02501544                       | MIR1256;CBARA1         | 1.15E-05          | 1.15E-05             | 0.223094           | -4.48242                     | T down vs N                            | 39.115  | 21.0784   | 8.62216    | 1         |
| cg02501714                       | GAS1;GAS1              | 0.00046244        | 0.000462442          | 0.280529           | -3.5647                      | T down vs N                            | 19.219  | 15.1324   | 12.5981    | 1         |
| cg02502025                       | BEND4;BEND4            | 0.00101162        | 0.00101162           | 0.251226           | -3.98047                     | T down vs N                            | 16.076  | 17.8731   | 17.7886    | 1         |
| cg02504617                       | MAGEC1                 | 3.31E-05          | 3.31E-05             | 0.222903           | -4.48626                     | T down vs N                            | 32.449  | 21.1025   | 10.4052    | 1         |
| cg02505827                       | MARVELD2;MARVELD2      | 0.00018836        | 0.000188359          | 5.36902            | 5.36902                      | T up vs N                              | 23.236  | 26.4554   | 18.2171    | 1         |
| cg02506908                       | HPD                    | 1.42E-05          | 1.42E-05             | 0.24396            | -4.09902                     | T down vs N                            | 37.719  | 18.6406   | 7.90727    | 1         |
| cg02510802                       | SPAG4L;SPAG4L          | 8.17E-05          | 8.17E-05             | 0.315847           | -3.16609                     | T down vs N                            | 27.405  | 12.4406   | 7.26337    | 1         |
| cg02510853                       | PKMYT1;PKMYT1          | 0.00075178        | 0.000751782          | 3.17588            | 3.17588                      | T up vs N                              | 17.231  | 12.5073   | 11.614     | 1         |
| cg02512902                       | KSR1                   | 1.68E-07          | 1.68E-07             | 0.170608           | -5.86138                     | T down vs N                            | 76.72   | 29.2897   | 6.10838    | 1         |
| cg02514559                       | C9orf57                | 4.26E-06          | 4.26E-06             | 0.210417           | -4.75247                     | T down vs N                            | 46.246  | 22.7545   | 7.87251    | 1         |
| cg02515233                       | MAMDC2;MAMDC2          | 0.00161401        | 0.00161401           | 5.02518            | 5.02518                      | T up vs N                              | 14.347  | 24.4127   | 27.2258    | 1         |
| cg02515422                       | TLR4;TLR4;TLR4;TLR4    | 3.17E-06          | 3.17E-06             | 0.134662           | -7.42603                     | T down vs N                            | 48.54   | 37.6519   | 12.4111    | 1         |
| cg02515467                       | THUMP1                 | 5.66E-05          | 5.66E-05             | 0.283654           | -3.52542                     | T down vs N                            | 29.385  | 14.8697   | 8.0966     | 1         |
| cg02517337                       | TSHZ2                  | 0.00093103        | 0.000931034          | 0.238184           | -4.19843                     | T down vs N                            | 16.395  | 19.2793   | 18.8154    | 1         |
| cg02517488                       | RP1L1                  | 0.00550747        | 0.00550747           | 0.290889           | -3.43774                     | T down vs N                            | 10.279  | 14.2812   | 22.2305    | 1         |
| cg02525643                       | RPS10                  | 0.00046301        | 0.000463011          | 0.256771           | -3.89451                     | T down vs N                            | 19.214  | 17.3127   | 14.4171    | 1         |
| cg02527886                       | CARD11                 | 0.00059555        | 0.000595549          | 0.208331           | -4.80005                     | T down vs N                            | 18.168  | 23.0463   | 20.2959    | 1         |
| cg02528008                       | MCC;MCC                | 6.01E-06          | 6.01E-06             | 0.329083           | -3.03875                     | T down vs N                            | 43.673  | 11.5701   | 4.23884    | 1         |
| cg02529919                       | PRSS22                 | 3.57E-05          | 3.57E-05             | 0.273384           | -3.65786                     | T down vs N                            | 32.001  | 15.7529   | 7.87627    | 1         |
| RAB34;RAB34;RAB34;RAB34;RAB34;R  |                        |                   |                      |                    |                              |                                        |         |           |            |           |
| cg02530437                       | AB34;RAB34;RAB34;RAB34 | 0.00175024        | 0.00175024           | 6.72792            | 6.72792                      | T up vs N                              | 14.058  | 34.0352   | 38.7384    | 1         |
| cg02534760                       | C11orf64               | 0.00015289        | 0.000152892          | 0.195749           | -5.10858                     | T down vs N                            | 24.236  | 24.9131   | 16.4468    | 1         |
| cg02534850                       | HMG2;HMG2              | 1.60E-05          | 1.60E-05             | 0.330759           | -3.02335                     | T down vs N                            | 36.92   | 11.4646   | 4.96842    | 1         |
| cg02535012                       | UBE2CBP;DOPEY1         | 1.47E-05          | 1.47E-05             | 0.19232            | -5.19966                     | T down vs N                            | 37.5    | 25.4559   | 10.8612    | 1         |
| LRRC27;LRRC27;LRRC27;LRRC27;LRRC |                        |                   |                      |                    |                              |                                        |         |           |            |           |
| cg02535060                       | 27                     | 0.00087073        | 0.00087073           | 0.204315           | -4.89441                     | T down vs N                            | 16.654  | 23.6218   | 22.6944    | 1         |
| cg02536263                       | PLXDC2                 | 0.00537668        | 0.00537668           | 3.14888            | 3.14888                      | T up vs N                              | 10.352  | 12.3232   | 19.0466    | 1         |
| cg02538783                       | PARD3                  | 2.19E-05          | 2.19E-05             | 0.303829           | -3.29133                     | T down vs N                            | 34.938  | 13.2922   | 6.0872     | 1         |
| cg02542401                       | MRPL3                  | 1.15E-05          | 1.15E-05             | 0.211177           | -4.73535                     | T down vs N                            | 39.103  | 22.6493   | 9.26762    | 1         |
| cg02542440                       | LOC441601              | 0.00015988        | 0.000159875          | 0.30546            | -3.27375                     | T down vs N                            | 24.02   | 13.173    | 8.77472    | 1         |
| cg02544031                       | TMEM233                | 2.07E-05          | 2.07E-05             | 0.236005           | -4.23719                     | T down vs N                            | 35.285  | 19.527    | 8.85461    | 1         |
| cg02544453                       | MYLK3                  | 1.44E-07          | 1.44E-07             | 0.261005           | -3.83134                     | T down vs N                            | 78.455  | 16.8987   | 3.4463     | 1         |
| cg02546607                       | WVVOX                  | 0.00456665        | 0.00456665           | 0.291774           | -3.42731                     | T down vs N                            | 10.857  | 14.211    | 20.9422    | 1         |
| cg02546786                       | FAM98B;FAM98B          | 0.00016596        | 0.000165957          | 0.16892            | -5.91995                     | T down vs N                            | 23.84   | 29.62     | 19.8793    | 1         |
| cg02546848                       | GPR78                  | 8.88E-05          | 8.88E-05             | 0.307713           | -3.24978                     | T down vs N                            | 26.97   | 13.0103   | 7.71843    | 1         |
| cg02548364                       | MT1H                   | 6.46E-05          | 6.46E-05             | 6.38246            | 6.38246                      | T up vs N                              | 28.665  | 32.179    | 17.9616    | 1         |
| cg02549645                       | NODAL                  | 6.43E-05          | 6.43E-05             | 7.36522            | 7.36522                      | T up vs N                              | 28.684  | 37.3437   | 20.8302    | 1         |
| cg02553054                       | SMARCD1;SMARCD1        | 0.00112759        | 0.00112759           | 0.327201           | -3.05622                     | T down vs N                            | 15.665  | 11.6898   | 11.9398    | 1         |
| cg02555243                       | SOX5;SOX5              | 9.08E-05          | 9.08E-05             | 0.155951           | -6.41228                     | T down vs N                            | 26.855  | 32.341    | 19.2685    | 1         |

| Probeset ID               | UCSC_REFGENE_NAME           | p-value<br>(Type) | p-value (T vs.<br>N) | Ratio (T<br>vs. N) | Fold-<br>Change (T<br>vs. N) | Fold-Change (T vs.<br>N) (Description) | F(Type) | SS (Type) | SS (Error) | F (Error) |
|---------------------------|-----------------------------|-------------------|----------------------|--------------------|------------------------------|----------------------------------------|---------|-----------|------------|-----------|
| cg02556071                | CARD18                      | 0.00066867        | 0.000668668          | 0.332983           | -3.00316                     | T down vs N                            | 17.699  | 11.3261   | 10.2391    | 1         |
| cg02558162                | CRABP1                      | 7.16E-05          | 7.16E-05             | 0.263957           | -3.78849                     | T down vs N                            | 28.11   | 16.6169   | 9.4583     | 1         |
| cg02558684                | MIRLET7A1                   | 2.43E-05          | 2.43E-05             | 0.192038           | -5.2073                      | T down vs N                            | 34.309  | 25.5013   | 11.8926    | 1         |
| cg02560408                | RHOBTB1;RHOBTB1             | 8.07E-05          | 8.07E-05             | 0.221414           | -4.51643                     | T down vs N                            | 27.47   | 21.2914   | 12.401     | 1         |
| cg02562761                | TFAP4                       | 3.76E-05          | 3.76E-05             | 0.268594           | -3.72309                     | T down vs N                            | 31.701  | 16.1852   | 8.16904    | 1         |
| cg02566775                | PLAGL1;PLAGL1               | 2.82E-06          | 2.82E-06             | 0.325826           | -3.06912                     | T down vs N                            | 49.474  | 11.7781   | 3.80909    | 1         |
| cg02567476                | SLC9A4;SLC9A4               | 2.09E-06          | 2.09E-06             | 0.291387           | -3.43186                     | T down vs N                            | 51.923  | 14.2416   | 4.38853    | 1         |
| cg02569138                | SMARCAL1;SMARCAL1           | 0.00350094        | 0.00350094           | 0.203567           | -4.9124                      | T down vs N                            | 11.704  | 23.7311   | 32.4424    | 1         |
| cg02569740                | XKR6                        | 0.00108616        | 0.00108616           | 0.3219             | -3.10656                     | T down vs N                            | 15.806  | 12.0342   | 12.1818    | 1         |
| cg02572606                | THUMPD1                     | 0.00054747        | 0.000547474          | 0.273029           | -3.66262                     | T down vs N                            | 18.514  | 15.7845   | 13.6411    | 1         |
| cg02573468                | DLL4                        | 0.00416385        | 0.00416385           | 0.155274           | -6.44025                     | T down vs N                            | 11.148  | 32.4927   | 46.6344    | 1         |
| cg02577896                | BFSP2                       | 0.00079104        | 0.000791044          | 0.313182           | -3.19303                     | T down vs N                            | 17.03   | 12.6242   | 11.861     | 1         |
| cg02578087                | C3orf32                     | 0.00623394        | 0.00623394           | 0.172322           | -5.80308                     | T down vs N                            | 9.9038  | 28.9595   | 46.7853    | 1         |
| cg02578944                | NKAPL                       | 2.82E-05          | 2.82E-05             | 7.28612            | 7.28612                      | T up vs N                              | 33.391  | 36.9409   | 17.7011    | 1         |
| cg02579133                | KRTAP10-8;C21orf29          | 0.00018617        | 0.00018617           | 0.171118           | -5.84391                     | T down vs N                            | 23.291  | 29.1909   | 20.053     | 1         |
| cg02580005                | LRBA;MAB21L2                | 0.00299209        | 0.00299209           | 3.6206             | 3.6206                       | T up vs N                              | 12.218  | 15.5051   | 20.3042    | 1         |
| cg02582754                | MAS1                        | 0.00398993        | 0.00398993           | 0.230935           | -4.33023                     | T down vs N                            | 11.284  | 20.1189   | 28.5283    | 1         |
| cg02582887                | FAM58A;FAM58A               | 0.0005277         | 0.000527697          | 0.312971           | -3.19519                     | T down vs N                            | 18.666  | 12.6389   | 10.8336    | 1         |
| cg02583465                | TRIM31                      | 0.00267858        | 0.00267858           | 0.275677           | -3.62743                     | T down vs N                            | 12.587  | 15.5506   | 19.7667    | 1         |
| cg02583620                | CALCB                       | 0.00028999        | 0.00028999           | 0.274648           | -3.64102                     | T down vs N                            | 21.248  | 15.641    | 11.7777    | 1         |
| cg02585906                | SIGIRR;SIGIRR;SIGIRR        | 1.07E-06          | 1.07E-06             | 0.243463           | -4.1074                      | T down vs N                            | 57.8    | 18.6946   | 5.17499    | 1         |
| cg02587435                | MS4A4A;MS4A4A               | 7.27E-09          | 7.27E-09             | 0.091418           | -10.9388                     | T down vs N                            | 120.78  | 53.6042   | 7.10103    | 1         |
| cg02587648                | PRKCZ;PRKCZ                 | 0.00593473        | 0.00593473           | 3.29234            | 3.29234                      | T up vs N                              | 10.052  | 13.2991   | 21.1688    | 1         |
| cg02588321                | MGC87042;MGC87042           | 0.00146584        | 0.00146584           | 0.303947           | -3.29005                     | T down vs N                            | 14.695  | 13.2835   | 14.4634    | 1         |
| MOG;MOG;MOG;MOG;MOG;MOG;M |                             |                   |                      |                    |                              |                                        |         |           |            |           |
| cg02589899                | OG;MOG;MOG;MOG;MOG          | 0.0011508         | 0.0011508            | 5.41494            | 5.41494                      | T up vs N                              | 15.588  | 26.7242   | 27.4298    | 1         |
| cg02590060                | C1orf123                    | 6.07E-05          | 6.07E-05             | 0.302617           | -3.30451                     | T down vs N                            | 29      | 13.3816   | 7.38307    | 1         |
| cg02590287                | CLDN2;CLDN2                 | 0.0002187         | 0.000218703          | 0.234157           | -4.27063                     | T down vs N                            | 22.535  | 19.7402   | 14.0155    | 1         |
| cg02592239                | CST9L                       | 0.00010228        | 0.000102282          | 0.210318           | -4.7547                      | T down vs N                            | 26.241  | 22.7682   | 13.8824    | 1         |
| cg02592271                | KRTCAP3;KRTCAP3             | 0.00054           | 0.000540003          | 4.25358            | 4.25358                      | T up vs N                              | 18.571  | 19.6316   | 16.914     | 1         |
| cg02594607                | HS3ST4                      | 0.00016761        | 0.000167612          | 0.140807           | -7.10192                     | T down vs N                            | 23.792  | 35.9944   | 24.206     | 1         |
| cg02595280                | NOS1                        | 2.31E-05          | 2.31E-05             | 0.258337           | -3.87092                     | T down vs N                            | 34.616  | 17.1582   | 7.93088    | 1         |
| cg02596153                | NR2E1                       | 4.89E-05          | 4.89E-05             | 0.108523           | -9.21467                     | T down vs N                            | 30.199  | 46.1933   | 24.4745    | 1         |
| cg02598319                | C6;C6                       | 2.26E-09          | 2.26E-09             | 0.104134           | -9.603                       | T down vs N                            | 142.18  | 47.9265   | 5.39328    | 1         |
| cg02598756                | NACAD                       | 5.03E-06          | 5.03E-06             | 6.70912            | 6.70912                      | T up vs N                              | 44.996  | 33.9354   | 12.0671    | 1         |
| cg02599006                | RBKS                        | 0.0002473         | 0.000247297          | 0.305689           | -3.27129                     | T down vs N                            | 21.969  | 13.1563   | 9.58173    | 1         |
| cg02599583                | FAM127C;FAM127C             | 0.00214768        | 0.00214768           | 0.289562           | -3.4535                      | T down vs N                            | 13.34   | 14.3872   | 17.2557    | 1         |
| cg02602264                | CYP2W1                      | 0.0008006         | 0.000800599          | 0.232581           | -4.29958                     | T down vs N                            | 16.982  | 19.9244   | 18.7719    | 1         |
| cg02602550                | IRX6                        | 3.17E-06          | 3.17E-06             | 8.19422            | 8.19422                      | T up vs N                              | 48.543  | 41.4398   | 13.6589    | 1         |
| cg02604304                | ZNF117                      | 0.00013252        | 0.000132518          | 0.25005            | -3.99919                     | T down vs N                            | 24.938  | 17.9948   | 11.5453    | 1         |
| cg02605461                | RALY;RALY                   | 0.00012949        | 0.000129488          | 0.206147           | -4.85091                     | T down vs N                            | 26.053  | 21.9831   | 12.6566    | 1         |
| cg02606403                | LOC100132215                | 0.00640558        | 0.00640558           | 4.09724            | 4.09724                      | T up vs N                              | 9.8225  | 18.6291   | 30.3454    | 1         |
| cg02607810                | SEMA3D                      | 2.99E-05          | 2.99E-05             | 0.214639           | -4.65899                     | T down vs N                            | 33.059  | 22.1781   | 10.7338    | 1         |
| cg02609880                | BCAN;BCAN                   | 0.00029244        | 0.000292435          | 0.300048           | -3.3328                      | T down vs N                            | 21.211  | 13.5731   | 10.2388    | 1         |
| cg02611848                | C2orf65                     | 0.00029907        | 0.000299065          | 8.37514            | 8.37514                      | T up vs N                              | 21.11   | 42.3047   | 32.0636    | 1         |
| cg02612927                | DEFB124                     | 0.00012723        | 0.000127232          | 0.301849           | -3.31292                     | T down vs N                            | 25.14   | 13.4385   | 8.55276    | 1         |
| cg02613223                | OR6K6                       | 1.78E-06          | 1.78E-06             | 0.250216           | -3.99656                     | T down vs N                            | 53.305  | 17.9776   | 5.39618    | 1         |
| cg02614016                | MINPP1                      | 1.25E-05          | 1.25E-05             | 0.289665           | -3.45226                     | T down vs N                            | 38.548  | 14.3789   | 5.96817    | 1         |
| cg02614999                | POLR1B;POLR1B               | 0.00024511        | 0.000245114          | 0.169378           | -5.90396                     | T down vs N                            | 22.01   | 29.53     | 21.467     | 1         |
| cg02616604                | SYT15;SYT15                 | 0.0041112         | 0.0041112            | 3.04309            | 3.04309                      | T up vs N                              | 11.188  | 11.5999   | 16.5885    | 1         |
| cg02616947                | KAZALD1                     | 6.89E-05          | 6.89E-05             | 44.9278            | 44.9278                      | T up vs N                              | 28.312  | 135.607   | 76.6372    | 1         |
| cg02617702                | FCHO1;FCHO1                 | 0.00689415        | 0.00689415           | 0.3217             | -3.10849                     | T down vs N                            | 9.6039  | 12.0473   | 20.0708    | 1         |
| cg02617898                | OR10G3                      | 0.00315065        | 0.00315065           | 0.293395           | -3.40837                     | T down vs N                            | 12.048  | 14.0834   | 18.7032    | 1         |
| cg02619315                | SCUBE2;SCUBE2;FLJ46111      | 3.41E-05          | 3.41E-05             | 0.215274           | -4.64525                     | T down vs N                            | 32.263  | 22.0931   | 10.9565    | 1         |
| cg02620784                | NDUFC1                      | 1.52E-05          | 1.52E-05             | 0.177023           | -5.64897                     | T down vs N                            | 37.281  | 28.0797   | 12.051     | 1         |
| cg02624770                | TRIL                        | 0.00550778        | 0.00550778           | 8.00507            | 8.00507                      | T up vs N                              | 10.279  | 40.5247   | 63.0829    | 1         |
| cg02626129                | C13orf33;C13orf33           | 7.66E-05          | 7.66E-05             | 16.1605            | 16.1605                      | T up vs N                              | 27.751  | 72.5193   | 41.8115    | 1         |
| cg02626307                | CCT3;CCT3;CCT3;C1orf182     | 0.00054225        | 0.000542251          | 0.320129           | -3.12375                     | T down vs N                            | 18.554  | 12.1516   | 10.4792    | 1         |
| cg02627455                | HoxA3;HoxA3                 | 0.00545109        | 0.00545109           | 5.03034            | 5.03034                      | T up vs N                              | 10.31   | 24.4438   | 37.934     | 1         |
| cg02627682                | FLJ23867;QSOX1;QSOX1        | 3.36E-05          | 3.36E-05             | 0.318242           | -3.14226                     | T down vs N                            | 32.361  | 12.278    | 6.07049    | 1         |
| cg02629586                | RDH16                       | 3.77E-06          | 3.77E-06             | 0.219062           | -4.56491                     | T down vs N                            | 47.188  | 21.594    | 7.32182    | 1         |
| cg02629615                | DMD;DMD;DMD;DMD;DMD;DMD     | 3.41E-08          | 3.41E-08             | 0.28665            | -3.48858                     | T down vs N                            | 96.948  | 14.6228   | 2.41331    | 1         |
| cg02630629                | KCNAB2;KCNAB2               | 0.00108276        | 0.00108276           | 0.241645           | -4.1383                      | T down vs N                            | 15.818  | 18.8935   | 19.111     | 1         |
| cg02631286                | SPOCD1                      | 0.00017407        | 0.000174073          | 5.07949            | 5.07949                      | T up vs N                              | 23.611  | 24.7389   | 16.7645    | 1         |
| cg02631767                | PDE3A                       | 0.00031553        | 0.000315533          | 0.294058           | -3.40069                     | T down vs N                            | 20.872  | 14.0317   | 10.7563    | 1         |
| cg02633398                | CBFA2T3;CBFA2T3             | 8.54E-05          | 8.54E-05             | 0.264844           | -3.77581                     | T down vs N                            | 27.175  | 16.5333   | 9.73451    | 1         |
| cg02633609                | ITGA11                      | 5.11E-06          | 5.11E-06             | 0.318394           | -3.14076                     | T down vs N                            | 44.879  | 12.2678   | 4.37368    | 1         |
| cg02634141                | MIR507;MIR506               | 4.10E-05          | 4.10E-05             | 0.279351           | -3.57972                     | T down vs N                            | 31.195  | 15.2327   | 7.81282    | 1         |
| cg02634341                | FAM163A                     | 0.0033186         | 0.0033186            | 3.0717             | 3.0717                       | T up vs N                              | 11.878  | 11.7958   | 15.8895    | 1         |
|                           |                             |                   |                      |                    |                              |                                        |         |           |            |           |
| cg02636348                | KCNMA1;KCNMA1;KCNMA1;KCNMA1 | 0.00014124        | 0.000141244          | 0.254625           | -3.92734                     | T down vs N                            | 24.624  | 17.5271   | 11.3889    | 1         |
| cg02637512                | BRD8;NME5                   | 6.87E-06          | 6.87E-06             | 0.267963           | -3.73186                     | T down vs N                            | 42.706  | 16.2432   | 6.0856     | 1         |

| Probeset ID | UCSC_REFGENE_NAME         | p-value<br>(Type) | p-value (T vs.<br>N) | Ratio (T<br>vs. N) | Fold-<br>Change (T<br>vs. N) | Fold-Change (T vs.<br>N) (Description) | F(Type) | SS (Type) | SS (Error) | F (Error) |
|-------------|---------------------------|-------------------|----------------------|--------------------|------------------------------|----------------------------------------|---------|-----------|------------|-----------|
| cg02637882  | ZNF280C                   | 6.91E-05          | 6.91E-05             | 0.25885            | -3.86325                     | T down vs N                            | 28.296  | 17.108    | 9.67367    | 1         |
| cg02639123  | ACTR3C;LRRRC61;LRRRC61    | 0.00309908        | 0.00309908           | 4.50496            | 4.50496                      | T up vs N                              | 12.102  | 21.2196   | 28.0539    | 1         |
| cg02639634  | RG520;RGS20               | 0.00150418        | 0.00150418           | 7.84473            | 7.84473                      | T up vs N                              | 14.601  | 39.7402   | 43.5479    | 1         |
| cg02640147  | KCNIP1;KCNIP1;KCNIP1      | 4.33E-05          | 4.33E-05             | 0.298246           | -3.35294                     | T down vs N                            | 30.883  | 13.7093   | 7.1027     | 1         |
| cg02641400  | SPTLC1;SPTLC1             | 2.68E-05          | 2.68E-05             | 0.283271           | -3.53019                     | T down vs N                            | 33.701  | 14.9016   | 7.0747     | 1         |
| cg02642549  | LHFP12                    | 1.46E-05          | 1.46E-05             | 4.45119            | 4.45119                      | T up vs N                              | 37.531  | 20.8824   | 8.90236    | 1         |
| cg02643647  | LOC100287834;LOC100287704 | 0.00088168        | 0.00088168           | 0.311303           | -3.2123                      | T down vs N                            | 16.605  | 12.7554   | 12.2904    | 1         |
| cg02646064  | MYL7                      | 0.00119951        | 0.00119951           | 0.318184           | -3.14284                     | T down vs N                            | 15.433  | 12.282    | 12.733     | 1         |
| cg02646225  | LRRCC1;LRRCC1             | 0.00203974        | 0.00203974           | 0.259075           | -3.85989                     | T down vs N                            | 13.519  | 17.086    | 20.2214    | 1         |
| cg02647628  | FOX2;FOX2;FOX2            | 5.47E-05          | 5.47E-05             | 0.25941            | -3.8549                      | T down vs N                            | 29.573  | 17.0533   | 9.2265     | 1         |
| cg02647684  | RNASE12                   | 2.90E-06          | 2.90E-06             | 0.14188            | -7.04821                     | T down vs N                            | 49.265  | 35.7162   | 11.5998    | 1         |
| cg02647929  | MGRN1;MGRN1;MGRN1;MGRN1   | 0.00071226        | 0.000712261          | 0.301437           | -3.31744                     | T down vs N                            | 17.446  | 13.4691   | 12.3531    | 1         |
| cg02647998  | TIMP4;SYN2;SYN2           | 0.00159673        | 0.00159673           | 0.282219           | -3.54335                     | T down vs N                            | 14.386  | 14.9897   | 16.672     | 1         |
| cg02650512  | RPL23A;SNORD4A;SNORD42A   | 1.90E-05          | 1.90E-05             | 0.237667           | -4.20757                     | T down vs N                            | 35.843  | 19.3377   | 8.63229    | 1         |
| cg02652344  | FBXW2                     | 0.00357584        | 0.00357584           | 0.325801           | -3.06936                     | T down vs N                            | 11.635  | 11.7797   | 16.1987    | 1         |
| cg02652760  | POM121L2                  | 1.00E-06          | 1.00E-06             | 0.266554           | -3.75159                     | T down vs N                            | 58.361  | 16.3735   | 4.48891    | 1         |
| cg02654164  | JPH2                      | 9.31E-06          | 9.31E-06             | 0.283075           | -3.53263                     | T down vs N                            | 40.56   | 14.918    | 5.88478    | 1         |
| cg02654411  | IFT140                    | 0.00370207        | 0.00370207           | 0.193459           | -5.16907                     | T down vs N                            | 11.523  | 25.274    | 35.0926    | 1         |
| cg02656594  | IL21R                     | 8.39E-05          | 8.39E-05             | 0.264417           | -3.78191                     | T down vs N                            | 27.27   | 16.5735   | 9.72409    | 1         |
| cg02656891  | C1orf94;C1orf94           | 2.24E-05          | 2.24E-05             | 31.5451            | 31.5451                      | T up vs N                              | 34.808  | 111.572   | 51.2865    | 1         |
| cg02657441  | PLUNC;PLUNC               | 1.61E-06          | 1.61E-06             | 0.245289           | -4.07682                     | T down vs N                            | 54.161  | 18.4974   | 5.46439    | 1         |
| cg02657539  | OR10V1                    | 0.00195933        | 0.00195933           | 0.207663           | -4.81549                     | T down vs N                            | 13.66   | 23.1407   | 27.1057    | 1         |
| cg02657800  | TMEM132E                  | 6.03E-07          | 6.03E-07             | 4.66109            | 4.66109                      | T up vs N                              | 63.185  | 22.1911   | 5.61939    | 1         |
| cg02658214  | SDR9C7                    | 1.94E-05          | 1.94E-05             | 0.227493           | -4.39573                     | T down vs N                            | 35.717  | 20.5332   | 9.19816    | 1         |
| cg02658690  | COL4A1                    | 0.00134368        | 0.00134368           | 0.161569           | -6.18932                     | T down vs N                            | 15.013  | 31.1209   | 33.1671    | 1         |
| cg02662828  | ZAR1                      | 0.00036877        | 0.000368772          | 8.01406            | 8.01406                      | T up vs N                              | 20.188  | 40.5684   | 32.1527    | 1         |
| cg02665037  | HOTAIR                    | 1.06E-05          | 1.06E-05             | 0.199145           | -5.02147                     | T down vs N                            | 41.81   | 22.9557   | 8.2357     | 1         |
| cg02667414  | COL11A2;COL11A2;COL11A2   | 0.00359104        | 0.00359104           | 0.313024           | -3.19465                     | T down vs N                            | 11.622  | 12.6352   | 17.3956    | 1         |
| cg02667677  | PRDM1;PRDM1               | 1.06E-06          | 1.06E-06             | 0.245006           | -4.08153                     | T down vs N                            | 57.884  | 18.5278   | 5.12139    | 1         |
| cg02669193  | RPS6KA2                   | 4.58E-05          | 4.58E-05             | 0.22188            | -4.50695                     | T down vs N                            | 30.571  | 21.2321   | 11.1123    | 1         |
| cg02669888  | NOTCH4</                  |                   |                      |                    |                              |                                        |         |           |            |           |

| Probeset ID                                                    | UCSC_REFGENE_NAME             | p-value<br>(Type) | p-value (T vs.<br>N) | Ratio (T<br>vs. N) | Fold-<br>Change (T<br>vs. N) | Fold-Change (T vs.<br>N) (Description) | F(Type) | SS (Type) | SS (Error) | F (Error) |
|----------------------------------------------------------------|-------------------------------|-------------------|----------------------|--------------------|------------------------------|----------------------------------------|---------|-----------|------------|-----------|
| cg02724647                                                     | CECR4;CECR5;CECR4             | 0.0042756         | 0.0042756            | 0.323404           | -3.0921                      | T down vs N                            | 11.064  | 11.9353   | 17.2596    | 1         |
| cg02726263                                                     | MICA                          | 3.54E-05          | 3.54E-05             | 0.211614           | -4.72559                     | T down vs N                            | 32.045  | 22.5892   | 11.2789    | 1         |
| cg02728223                                                     | LOC283914;LOC283914           | 2.14E-06          | 2.14E-06             | 0.217339           | -4.60111                     | T down vs N                            | 51.75   | 21.8193   | 6.74602    | 1         |
| cg02729822                                                     | OR9G4                         | 0.0002289         | 0.000228895          | 0.144824           | -6.90492                     | T down vs N                            | 22.324  | 34.9689   | 25.0624    | 1         |
| cg02731390                                                     | PIK3AP1                       | 0.00023886        | 0.000238861          | 0.312695           | -3.19801                     | T down vs N                            | 22.128  | 12.6581   | 9.15261    | 1         |
| cg02732252                                                     | CLDN6                         | 0.0036502         | 0.0036502            | 6.6423             | 6.6423                       | T up vs N                              | 11.569  | 33.5794   | 46.4414    | 1         |
| cg02733650                                                     | DCTPP1;DCTPP1                 | 6.89E-05          | 6.89E-05             | 3.10537            | 3.10537                      | T up vs N                              | 29.547  | 11.3186   | 5.74608    | 1         |
| cg02735762                                                     | TTF1                          | 0.00010979        | 0.000109793          | 0.15163            | -6.59501                     | T down vs N                            | 25.88   | 33.3265   | 20.6034    | 1         |
| cg02735829                                                     | OR2Y1                         | 9.41E-06          | 9.41E-06             | 0.17637            | -5.66991                     | T down vs N                            | 40.487  | 28.1999   | 11.1442    | 1         |
| cg02736016                                                     | WNK1                          | 0.0017923         | 0.0017923            | 0.308639           | -3.24003                     | T down vs N                            | 13.973  | 12.944    | 14.8215    | 1         |
| cg02736204                                                     | GNL2                          | 0.00013146        | 0.000131462          | 0.261736           | -3.82064                     | T down vs N                            | 24.978  | 16.8284   | 10.7798    | 1         |
| PCDHGA4;PCDHGA6;PCDHGA1;PCDHG<br>A5;PCDHGB1;PCDHGA3;PCDHGA2;PC |                               |                   |                      |                    |                              |                                        |         |           |            |           |
| cg02741229                                                     | DHGB4;PCDHGA7;PCDHGB2;PCDHGB4 | 0.00424882        | 0.00424882           | 3.86636            | 3.86636                      | T up vs N                              | 11.084  | 17.1284   | 24.7248    | 1         |
| cg02742551                                                     | TBCCD1                        | 9.10E-05          | 9.10E-05             | 0.2872             | -3.4819                      | T down vs N                            | 26.843  | 14.578    | 8.68923    | 1         |
| cg02743029                                                     | SERTAD4;C1orf133              | 0.00098426        | 0.00098426           | 0.233713           | -4.27875                     | T down vs N                            | 16.181  | 19.7919   | 19.5707    | 1         |
| cg02745398                                                     | DEFB131                       | 0.00014127        | 0.000141269          | 0.27055            | -3.69618                     | T down vs N                            | 24.623  | 16.0071   | 10.4015    | 1         |
| cg02745713                                                     | C3orf42                       | 0.00122353        | 0.00122353           | 0.21336            | -4.6869                      | T down vs N                            | 15.359  | 22.3507   | 23.2829    | 1         |
| cg02746684                                                     | LOC220729                     | 9.08E-05          | 9.08E-05             | 4.24261            | 4.24261                      | T up vs N                              | 26.856  | 19.5616   | 11.6542    | 1         |
| cg02748047                                                     | BTNL2                         | 2.65E-06          | 2.65E-06             | 0.156526           | -6.38873                     | T down vs N                            | 49.984  | 32.2131   | 10.3115    | 1         |
| cg02749735                                                     | DGKG;DGKG;DGKG                | 0.00083754        | 0.000837537          | 3.15414            | 3.15414                      | T up vs N                              | 16.805  | 12.3591   | 11.7668    | 1         |
| cg02749948                                                     | TNXB                          | 0.00056076        | 0.00056076           | 0.212144           | -4.71377                     | T down vs N                            | 18.415  | 22.5164   | 19.5634    | 1         |
| cg02753354                                                     | HMHA1                         | 0.00013054        | 0.000130535          | 0.31077            | -3.21781                     | T down vs N                            | 25.013  | 12.7929   | 8.18331    | 1         |
| cg02754084                                                     | TPH2                          | 2.62E-06          | 2.62E-06             | 0.154379           | -6.47756                     | T down vs N                            | 50.083  | 32.6945   | 10.4448    | 1         |
| cg02756107                                                     | TRIM4;TRIM4                   | 0.00019887        | 0.000198872          | 0.228436           | -4.37759                     | T down vs N                            | 22.979  | 20.4187   | 14.2171    | 1         |
| cg02762634                                                     | NLK                           | 0.00074991        | 0.000749913          | 0.189083           | -5.28868                     | T down vs N                            | 17.766  | 24.4545   | 20.6473    | 1         |
| SORBS1;SORBS1;SORBS1;SORBS1;SOR                                |                               |                   |                      |                    |                              |                                        |         |           |            |           |
| cg02764250                                                     | BS1;SORBS1;SORBS1             | 4.54E-05          | 4.54E-05             | 0.321279           | -3.11256                     | T down vs N                            | 30.623  | 12.0752   | 6.30908    | 1         |
| cg02765177                                                     | CUZD1                         | 0.00092639        | 0.00092639           | 0.320925           | -3.11599                     | T down vs N                            | 16.414  | 12.0986   | 11.7936    | 1         |
| cg02766482                                                     | SNORA8;SNORA18;SNORD5         | 3.36E-06          | 3.36E-06             | 0.287774           | -3.47495                     | T down vs N                            | 48.094  | 14.5313   | 4.83431    | 1         |
| cg02768694                                                     | C2orf65                       | 0.00031459        | 0.000314587          | 3.15158            | 3.15158                      | T up vs N                              | 20.885  | 12.3416   | 9.45476    | 1         |
| cg02768785                                                     | CD3EAP;ERCC1;ERCC1            | 0.00020866        | 0.000208662          | 0.330424           | -3.02642                     | T down vs N                            | 22.754  | 11.4856   | 8.07631    | 1         |
| cg02769705                                                     | TMEM183B;TMEM183A             | 0.00039944        | 0.000399438          | 0.314728           | -3.17735                     | T down vs N                            | 19.843  | 12.5174   | 10.0933    | 1         |
| cg02771117                                                     | FAM167A;C8orf12               | 3.94E-05          | 3.94E-05             | 0.250312           | -3.99501                     | T down vs N                            | 31.426  | 17.9676   | 9.14781    | 1         |
| cg02771260                                                     | MS4A3;MS4A3;MS4A3             | 6.71E-08          | 6.71E-08             | 0.12795            | -7.81556                     | T down vs N                            | 87.853  | 39.5965   | 7.2114     | 1         |
| cg02771336                                                     | ASAP1                         | 2.20E-05          | 2.20E-05             | 0.196184           | -5.09727                     | T down vs N                            | 34.929  | 24.8454   | 11.381     | 1         |
| cg02772995                                                     | RBMS1;RBMS1                   | 6.30E-05          | 6.30E-05             | 0.155743           | -6.42082                     | T down vs N                            | 28.796  | 32.3874   | 17.9952    | 1         |
| cg02773045                                                     | HCG27                         | 0.00038197        | 0.000381967          | 0.301229           | -3.31974                     | T down vs N                            | 20.036  | 13.4847   | 10.7687    | 1         |
| cg02773086                                                     | HOXD3                         | 0.00042086        | 0.000420864          | 13.177             | 13.177                       | T up vs N                              | 19.619  | 62.2713   | 50.7854    | 1         |
| cg02776659                                                     | C21orf57                      | 0.00504758        | 0.00504758           | 4.46727            | 4.46727                      | T up vs N                              | 10.546  | 20.9834   | 31.8346    | 1         |
| cg02776664                                                     | MAST1                         | 0.00013481        | 0.000134805          | 9.23126            | 9.23126                      | T up vs N                              | 24.853  | 46.2682   | 29.7864    | 1         |
| cg02784144                                                     | GPC4                          | 0.00064744        | 0.000647435          | 0.29733            | -3.36326                     | T down vs N                            | 17.829  | 13.7791   | 12.3657    | 1         |
| cg02787087                                                     | IRX6                          | 0.00014512        | 0.00014512           | 9.14365            | 9.14365                      | T up vs N                              | 24.491  | 45.872    | 29.9685    | 1         |
| cg02788264                                                     | FXD4                          | 0.00283058        | 0.00283058           | 0.287985           | -3.4724                      | T down vs N                            | 12.403  | 14.5142   | 18.724     | 1         |
| cg02788731                                                     | OR2G2                         | 0.00043815        | 0.000438145          | 0.154729           | -6.46292                     | T down vs N                            | 19.447  | 32.6154   | 26.834     | 1         |
| cg02789965                                                     | PLK5P                         | 0.00732198        | 0.00732198           | 0.231796           | -4.31415                     | T down vs N                            | 9.608   | 18.8394   | 29.412     | 1         |
| cg02791851                                                     | KANK3                         | 0.00289399        | 0.00289399           | 0.327474           | -3.05368                     | T down vs N                            | 12.329  | 11.6724   | 15.1481    | 1         |
| cg02792538                                                     | SLC16A8                       | 0.00264409        | 0.00264409           | 4.65882            | 4.65882                      | T up vs N                              | 12.631  | 22.1771   | 28.0925    | 1         |
| cg02793507                                                     | GPX6                          | 3.08E-05          | 3.08E-05             | 0.172215           | -5.80669                     | T down vs N                            | 32.865  | 28.98     | 14.1085    | 1         |
| cg02795151                                                     | POLR2A                        | 0.00527458        | 0.00527458           | 0.249254           | -4.01196                     | T down vs N                            | 10.411  | 18.0776   | 27.7829    | 1         |
| cg02796420                                                     | EIF5B                         | 0.00107315        | 0.00107315           | 3.54145            | 3.54145                      | T up vs N                              | 15.852  | 14.977    | 15.1171    | 1         |
| cg02796568                                                     | SYNE1;SYNE1                   | 4.41E-06          | 4.41E-06             | 0.108568           | -9.21085                     | T down vs N                            | 45.981  | 46.1761   | 16.0681    | 1         |
| cg02796744                                                     | FXC1                          | 5.73E-07          | 5.73E-07             | 0.195984           | -5.10245                     | T down vs N                            | 63.683  | 24.8764   | 6.25009    | 1         |
| cg02798280                                                     | MAP4K1;MAP4K1                 | 0.00543087        | 0.00543087           | 3.35385            | 3.35385                      | T up vs N                              | 10.321  | 13.7154   | 21.2614    | 1         |
| cg02798703                                                     | ACTL7B                        | 2.34E-05          | 2.34E-05             | 0.212182           | -4.71294                     | T down vs N                            | 34.542  | 22.5113   | 10.4274    | 1         |
| cg02798801                                                     | BUD31;PDAP1                   | 2.50E-05          | 2.50E-05             | 0.201452           | -4.96396                     | T down vs N                            | 34.135  | 24.0435   | 11.2697    | 1         |
| cg02799427                                                     | TMEM114                       | 0.00022257        | 0.000222573          | 0.297338           | -3.36317                     | T down vs N                            | 22.454  | 13.7785   | 9.81814    | 1         |
| cg02800334                                                     | ANXA13;ANXA13                 | 0.00011696        | 0.000116956          | 0.271737           | -3.68002                     | T down vs N                            | 25.561  | 15.9      | 9.95255    | 1         |
| cg02805665                                                     | DHH                           | 0.00319378        | 0.00319378           | 3.88453            | 3.88453                      | T up vs N                              | 12.003  | 17.2474   | 22.9903    | 1         |
| cg02806032                                                     | FAM38A                        | 0.00040562        | 0.00040562           | 0.310114           | -3.22462                     | T down vs N                            | 19.777  | 12.8392   | 10.3874    | 1         |
| cg02809611                                                     | OR1F1                         | 5.37E-05          | 5.37E-05             | 0.242441           | -4.12471                     | T down vs N                            | 29.671  | 18.8061   | 10.1413    | 1         |
| cg02811156                                                     | VSIG4;VSIG4                   | 0.00013328        | 0.000133284          | 0.150017           | -6.66593                     | T down vs N                            | 24.909  | 33.7055   | 21.65      | 1         |
| cg02812036                                                     | YBX2                          | 0.0002544         | 0.000254403          | 5.37917            | 5.37917                      | T up vs N                              | 21.84   | 26.5148   | 19.4251    | 1         |
| cg02812142                                                     | ACMSD                         | 0.00052766        | 0.000527658          | 0.305453           | -3.27382                     | T down vs N                            | 18.667  | 13.1735   | 11.2916    | 1         |
| cg02812189                                                     | TBC1D28                       | 2.54E-05          | 2.54E-05             | 0.17924            | -5.5791                      | T down vs N                            | 34.041  | 27.6775   | 13.0092    | 1         |
| cg02813121                                                     | S100A12                       | 0.0073918         | 0.0073918            | 0.221193           | -4.52094                     | T down vs N                            | 9.5793  | 20.0655   | 31.4203    | 1         |
| cg02815538                                                     | LOC149620                     | 1.03E-05          | 1.03E-05             | 0.295051           | -3.38924                     | T down vs N                            | 42.071  | 13.1336   | 4.68268    | 1         |
| cg02818322                                                     | MAGEC3                        | 0.0003391         | 0.000339102          | 0.237774           | -4.20567                     | T down vs N                            | 20.554  | 19.3256   | 15.0436    | 1         |
| cg02819734                                                     | NLRC3                         | 0.00014486        | 0.000144862          | 0.317806           | -3.14657                     | T down vs N                            | 24.5    | 12.3075   | 8.03768    | 1         |
| cg02821871                                                     | SPHK2                         | 0.00648236        | 0.00648236           | 3.30492            | 3.30492                      | T up vs N                              | 9.7869  | 13.3844   | 21.8813    | 1         |
| cg02823783                                                     | DNAH10                        | 0.00066451        | 0.000664509          | 3.27135            | 3.27135                      | T up vs N                              | 17.724  | 13.1567   | 11.8771    | 1         |

| Probeset ID | UCSC_REFGENE_NAME               | p-value<br>(Type) | p-value (T vs.<br>N) | Ratio (T<br>vs. N) | Fold-<br>Change (T<br>vs. N) | Fold-Change (T vs.<br>N) (Description) | F(Type) | SS (Type) | SS (Error) | F (Error) |
|-------------|---------------------------------|-------------------|----------------------|--------------------|------------------------------|----------------------------------------|---------|-----------|------------|-----------|
| cg02824980  | CYP4F12                         | 2.24E-05          | 2.24E-05             | 0.256521           | -3.89832                     | T down vs N                            | 34.797  | 17.3376   | 7.97199    | 1         |
| cg02825709  | ZNF75A                          | 1.71E-06          | 1.71E-06             | 0.210978           | -4.73983                     | T down vs N                            | 53.64   | 22.6768   | 6.76414    | 1         |
| cg02825728  | CLDN17                          | 1.53E-06          | 1.53E-06             | 0.17286            | -5.78504                     | T down vs N                            | 54.588  | 28.8571   | 8.45813    | 1         |
| cg02826890  | ZNF767;ZNF767                   | 0.00057234        | 0.000572337          | 0.200237           | -4.99408                     | T down vs N                            | 18.331  | 24.2253   | 21.1447    | 1         |
| cg02829601  | SYTL3                           | 0.00023504        | 0.000235039          | 0.229637           | -4.3547                      | T down vs N                            | 22.202  | 20.2739   | 14.6104    | 1         |
| cg02831955  | CXCL17                          | 8.35E-05          | 8.35E-05             | 0.196676           | -5.0845                      | T down vs N                            | 27.294  | 24.769    | 14.5199    | 1         |
| cg02833108  | TAF4B                           | 7.68E-05          | 7.68E-05             | 0.154306           | -6.48065                     | T down vs N                            | 27.734  | 32.7112   | 18.8715    | 1         |
| cg02833172  | USP10                           | 0.00046857        | 0.000468567          | 0.325434           | -3.07282                     | T down vs N                            | 19.163  | 11.8035   | 9.85513    | 1         |
| cg02833725  | ISG20L2;C1orf66;C1orf66         | 0.00034659        | 0.000346587          | 0.332447           | -3.008                       | T down vs N                            | 20.459  | 11.3593   | 8.88381    | 1         |
| cg02836965  | SGCZ                            | 0.0007281         | 0.000728095          | 0.270296           | -3.69965                     | T down vs N                            | 17.358  | 16.03     | 14.7761    | 1         |
| cg02837027  | DCC                             | 1.44E-05          | 1.44E-05             | 0.293738           | -3.4044                      | T down vs N                            | 37.614  | 14.0566   | 5.97931    | 1         |
| cg02837536  | AJAP1;AJAP1                     | 0.00012609        | 0.000126086          | 8.85668            | 8.85668                      | T up vs N                              | 25.185  | 44.5596   | 28.3087    | 1         |
| cg02841523  | WWTR1;WWTR1;WWTR1               | 2.41E-06          | 2.41E-06             | 21.0317            | 21.0317                      | T up vs N                              | 50.771  | 86.902    | 27.3863    | 1         |
| cg02844589  | COX6B2                          | 0.0010464         | 0.0010464            | 0.299409           | -3.33992                     | T down vs N                            | 15.947  | 13.6213   | 13.6662    | 1         |
| cg02847185  | GPR78                           | 0.0028402         | 0.0028402            | 0.327209           | -3.05615                     | T down vs N                            | 12.391  | 11.6893   | 15.0936    | 1         |
| cg02847766  | ABCA17P                         | 3.97E-05          | 3.97E-05             | 0.258434           | -3.86946                     | T down vs N                            | 31.385  | 17.1487   | 8.7424     | 1         |
| cg02849695  | CCDC19                          | 0.00097021        | 0.000970214          | 8.68601            | 8.68601                      | T up vs N                              | 17.953  | 36.3113   | 26.2937    | 1         |
| cg02850742  | TUFM                            | 0.00053375        | 0.000533746          | 0.3077             | -3.24992                     | T down vs N                            | 18.619  | 13.0112   | 11.181     | 1         |
| cg02852670  | KLHL33                          | 9.29E-05          | 9.29E-05             | 11.1566            | 11.1566                      | T up vs N                              | 26.734  | 54.4914   | 32.6123    | 1         |
| cg02855850  | IVL                             | 3.49E-07          | 3.49E-07             | 0.214594           | -4.65996                     | T down vs N                            | 68.7    | 22.1841   | 5.16658    | 1         |
| cg02857726  | TM4SF1                          | 2.94E-05          | 2.94E-05             | 0.245076           | -4.08037                     | T down vs N                            | 33.146  | 18.5203   | 8.93993    | 1         |
| cg02858118  | CELSR3                          | 4.29E-06          | 4.29E-06             | 14.948             | 14.948                       | T up vs N                              | 46.203  | 68.5111   | 23.7253    | 1         |
| cg02861441  | LOC285375                       | 0.00533508        | 0.00533508           | 0.269323           | -3.71301                     | T down vs N                            | 10.376  | 16.1185   | 24.8555    | 1         |
| cg02863988  | PLIN5                           | 3.93E-05          | 3.93E-05             | 0.282274           | -3.54265                     | T down vs N                            | 31.436  | 14.985    | 7.62684    | 1         |
| cg02865896  | PWWP2B;PWWP2B                   | 0.00025185        | 0.000251848          | 0.330205           | -3.02842                     | T down vs N                            | 21.886  | 11.4994   | 8.40685    | 1         |
| cg02867145  | RFT1                            | 2.66E-05          | 2.66E-05             | 0.127801           | -7.82466                     | T down vs N                            | 33.762  | 39.6414   | 18.7866    | 1         |
| cg02867216  | TSHZ1                           | 3.56E-05          | 3.56E-05             | 0.170098           | -5.87898                     | T down vs N                            | 32.012  | 29.3891   | 14.6891    | 1         |
| cg02867696  | WNT5A                           | 0.00398241        | 0.00398241           | 0.209056           | -4.78341                     | T down vs N                            | 11.29   | 22.9443   | 32.5175    | 1         |
| cg02868976  | ITSN2;ITSN2;ITSN2               | 0.00044746        | 0.00044746           | 0.326796           | -3.06002                     | T down vs N                            | 19.358  | 11.7158   | 9.68351    | 1         |
| cg02870147  | MYT1L                           | 0.00013578        | 0.000135781          | 3.19429            | 3.19429                      | T up vs N                              | 24.818  | 12.6328   | 8.14437    | 1         |
| cg02871925  | TMEM115                         | 1.32E-06          | 1.32E-06             | 0.160422           | -6.23355                     | T down vs N                            | 55.902  | 31.3645   | 8.977      | 1         |
| cg02872767  | PLK5P                           | 0.00600348        | 0.00600348           | 0.285578           | -4.86434                     | T down vs N                            | 10.017  | 23.4389   | 37.4382    | 1         |
| cg02873384  | OR51G2                          | 2.63E-06          | 2.63E-06             | 0.29905            | -3.34392                     | T down vs N                            | 50.045  | 13.6484   | 4.36354    | 1         |
| cg02873421  | HOXB3                           | 2.38E-05          | 2.38E-05             | 5.39106            | 5.39106                      | T up vs N                              | 34.438  | 26.5845   | 12.3512    | 1         |
| cg02874031  | RFX4                            | 0.00054582        | 0.000545821          | 0.213419           | -4.68563                     | T down vs N                            | 18.527  | 22.3428   | 19.2959    | 1         |
| cg02874942  | ACP5;ACP5;ACP5;ACP5             | 5.08E-05          | 5.08E-05             | 10.4661            | 10.4661                      | T up vs N                              | 29.99   | 51.6427   | 27.5523    | 1         |
| cg02875240  | ZNF837;ZNF837                   | 7.94E-07          | 7.94E-07             | 0.179284           | -5.57773                     | T down vs N                            | 60.532  | 27.6696   | 7.31373    | 1         |
| cg02877240  | IFRD1;IFRD1                     | 0.00698641        | 0.00698641           | 0.306733           | -3.26016                     | T down vs N                            | 9.5646  | 13.0807   | 21.882     | 1         |
| cg02878222  | C16orf89;C16orf89               | 7.99E-06          | 7.99E-06             | 0.322534           | -3.10045                     | T down vs N                            | 41.627  | 11.9924   | 4.60943    | 1         |
| cg02879159  | TRIM15                          | 7.21E-06          | 7.21E-06             | 0.26706            | -3.74448                     | T down vs N                            | 42.361  | 16.3266   | 6.16664    | 1         |
| cg02879223  | DLG3;DLG3;DLG3                  | 0.00049284        | 0.000492836          | 6.7789             | 6.7789                       | T up vs N                              | 18.951  | 34.3053   | 28.9632    | 1         |
| cg02880356  | SFMBT2                          | 4.67E-05          | 4.67E-05             | 0.182105           | -5.49135                     | T down vs N                            | 30.464  | 27.1694   | 14.2697    | 1         |
| cg02883668  | KCNK10                          | 0.00022082        | 0.000220819          | 4.40397            | 4.40397                      | T up vs N                              | 22.491  | 20.5852   | 14.6445    | 1         |
| cg02884181  | UBLCP1                          | 8.04E-05          | 8.04E-05             | 0.246194           | -4.06184                     | T down vs N                            | 27.495  | 18.4006   | 10.7079    | 1         |
| cg02886132  | TYW1B;TYW1B                     | 0.00085028        | 0.000850277          | 0.332569           | -3.00689                     | T down vs N                            | 16.747  | 11.3518   | 10.8458    | 1         |
| cg02886509  | H19                             | 0.00367163        | 0.00367163           | 3.35716            | 3.35716                      | T up vs N                              | 11.55   | 13.7379   | 19.0309    | 1         |
| cg02886578  | LELP1                           | 8.80E-06          | 8.80E-06             | 0.180651           | -5.53553                     | T down vs N                            | 40.957  | 27.4256   | 10.7138    | 1         |
| cg02887114  | VSTM1                           | 3.58E-06          | 3.58E-06             | 0.294523           | -3.39532                     | T down vs N                            | 47.599  | 13.9954   | 4.70447    | 1         |
| cg02888113  | ZNF500                          | 0.00091823        | 0.000918233          | 0.306134           | -3.26654                     | T down vs N                            | 16.448  | 13.124    | 12.7666    | 1         |
| cg02888490  | TRIM15                          | 0.0002542         | 0.000254198          | 0.320118           | -3.12385                     | T down vs N                            | 21.843  | 12.1523   | 8.90144    | 1         |
| cg02889647  | IVL                             | 8.48E-05          | 8.48E-05             | 0.252972           | -3.953                       | T down vs N                            | 27.211  | 17.6944   | 10.4043    | 1         |
| cg02891218  | ZKSCAN1                         | 0.00023687        | 0.000236871          | 0.272379           | -3.67136                     | T down vs N                            | 22.167  | 15.8425   | 11.4353    | 1         |
| cg02891359  | FAM155A                         | 0.00025702        | 0.00025702           | 0.207247           | -4.82515                     | T down vs N                            | 21.793  | 23.1998   | 17.0328    | 1         |
| cg02891686  | SOD3                            | 8.47E-05          | 8.47E-05             | 3.59037            | 3.59037                      | T up vs N                              | 27.217  | 15.3037   | 8.99659    | 1         |
| cg02892624  | S100A7                          | 2.54E-05          | 2.54E-05             | 0.245021           | -4.08128                     | T down vs N                            | 34.031  | 18.5262   | 8.71035    | 1         |
| cg02893348  | RAD51L1;RAD51L1;RAD51L1         | 0.00015072        | 0.000150724          | 0.309377           | -3.2323                      | T down vs N                            | 24.306  | 12.8914   | 8.48614    | 1         |
| cg02893499  | LHPP;LHPP                       | 0.00011645        | 0.000116453          | 0.170282           | -5.87263                     | T down vs N                            | 25.583  | 29.3533   | 18.358     | 1         |
| cg02893799  | MS4A4A                          | 2.23E-08          | 2.23E-08             | 0.227058           | -4.40415                     | T down vs N                            | 103.01  | 20.5863   | 3.19762    | 1         |
| cg02895948  | PLXNA2                          | 6.45E-05          | 6.45E-05             | 0.224119           | -4.46192                     | T down vs N                            | 28.674  | 20.9498   | 11.6899    | 1         |
| cg02896073  | NOL4                            | 0.00122748        | 0.00122748           | 0.231667           | -4.31654                     | T down vs N                            | 15.347  | 20.0321   | 20.8839    | 1         |
| cg02898036  | OR52E2                          | 0.00379401        | 0.00379401           | 0.251078           | -3.98283                     | T down vs N                            | 11.445  | 17.8885   | 25.0089    | 1         |
| cg02898493  | ICAM2;ICAM2;ICAM2;ICAM2;ICAM2;I | 1.11E-05          | 1.11E-05             | 0.264701           | -3.77785                     | T down vs N                            | 39.345  | 16.5468   | 6.72883    | 1         |
|             | CAM2;ICAM2;ICAM2                |                   |                      |                    |                              |                                        |         |           |            |           |
|             | MT1DP;MT1DP                     |                   |                      |                    |                              |                                        |         |           |            |           |
|             | PARVA                           |                   |                      |                    |                              |                                        |         |           |            |           |
|             | CIB3                            |                   |                      |                    |                              |                                        |         |           |            |           |
|             | S100A12                         |                   |                      |                    |                              |                                        |         |           |            |           |
|             | SLMO2                           |                   |                      |                    |                              |                                        |         |           |            |           |
|             | CEACAM20;CEACAM20;CEACAM20;CE   |                   |                      |                    |                              |                                        |         |           |            |           |
|             | ACAM20                          |                   |                      |                    |                              |                                        |         |           |            |           |
|             | TAF1C;TAF1C                     |                   |                      |                    |                              |                                        |         |           |            |           |
| cg02904918  | MS4A14;MS4A14;MS4A14;MS4A14     | 0.00148114        | 0.00148114           | 0.283219           | -3.53083                     | T down vs N                            | 14.657  | 14.906    | 16.2718    | 1         |
| cg02906827  |                                 | 0.0007685         | 0.0007685            | 0.239247           | -4.17979                     | T down vs N                            | 17.144  | 19.1598   | 17.8817    | 1         |
| cg02907837  |                                 | 0.00093707        | 0.000937065          | 0.32711            | -3.05708                     | T down vs N                            | 16.37   | 11.6957   | 11.4316    | 1         |

| Probeset ID | UCSC_REFGENE_NAME        | p-value<br>(Type) | p-value (T vs.<br>N) | Ratio (T<br>vs. N) | Fold-<br>Change (T<br>vs. N) | Fold-Change (T vs.<br>N) (Description) | F(Type) | SS (Type) | SS (Error) | F (Error) |
|-------------|--------------------------|-------------------|----------------------|--------------------|------------------------------|----------------------------------------|---------|-----------|------------|-----------|
| cg02908748  | LY86                     | 5.19E-06          | 5.19E-06             | 0.314705           | -3.17758                     | T down vs N                            | 44.754  | 12.5189   | 4.47566    | 1         |
| cg02909158  | ZIC5                     | 0.00372906        | 0.00372906           | 0.178335           | -5.60742                     | T down vs N                            | 11.5    | 27.8408   | 38.7351    | 1         |
| cg02909789  | RAD51L1;RAD51L1;RAD51L1  | 3.45E-07          | 3.45E-07             | 0.287316           | -3.48048                     | T down vs N                            | 68.816  | 14.5685   | 3.38725    | 1         |
| cg02909890  | POPCD3;POPCD3            | 0.00088769        | 0.000887685          | 0.277236           | -3.60704                     | T down vs N                            | 16.579  | 15.4148   | 14.8765    | 1         |
| cg02910054  | SNX29                    | 4.74E-06          | 4.74E-06             | 0.30068            | -3.3258                      | T down vs N                            | 45.435  | 13.5257   | 4.76311    | 1         |
| cg02915692  | NCRNA00202               | 0.00012095        | 0.000120945          | 0.29356            | -3.40646                     | T down vs N                            | 25.393  | 14.0705   | 8.86581    | 1         |
| cg02916102  | CYP11A1;CYP11A1;CYP11A1  | 0.00198852        | 0.00198852           | 5.64395            | 5.64395                      | T up vs N                              | 13.608  | 28.0509   | 32.982     | 1         |
| cg02916147  | AQP8                     | 5.48E-06          | 5.48E-06             | 0.209948           | -4.76309                     | T down vs N                            | 44.358  | 22.8197   | 8.2311     | 1         |
| cg02918557  | RADIL;PAPOLB             | 0.00070138        | 0.00070138           | 3.13986            | 3.13986                      | T up vs N                              | 17.507  | 12.2617   | 11.2062    | 1         |
| cg02919712  | DEPDC6                   | 0.00047961        | 0.000479611          | 0.31469            | -3.17773                     | T down vs N                            | 19.065  | 12.52     | 10.5071    | 1         |
| cg02919982  | SPRR1B                   | 2.91E-05          | 2.91E-05             | 0.325855           | -3.06885                     | T down vs N                            | 33.218  | 11.7762   | 5.67222    | 1         |
| cg02924487  | TP73;TP73;TP73;TP73      | 7.88E-05          | 7.88E-05             | 4.92875            | 4.92875                      | T up vs N                              | 27.6    | 23.8303   | 13.8148    | 1         |
| cg02927252  | KIAA1026;KIAA1026        | 0.00409868        | 0.00409868           | 0.298582           | -3.34916                     | T down vs N                            | 11.198  | 13.6838   | 19.5516    | 1         |
| cg02927904  | TMEM132E                 | 0.00059171        | 0.000591712          | 3.86804            | 3.86804                      | T up vs N                              | 18.195  | 17.1394   | 15.072     | 1         |
| cg02928885  | GAD2;GAD2                | 2.14E-06          | 2.14E-06             | 0.194319           | -5.14618                     | T down vs N                            | 51.757  | 25.1376   | 7.77105    | 1         |
| cg02929431  | BIN2                     | 3.60E-06          | 3.60E-06             | 0.203865           | -4.90522                     | T down vs N                            | 47.548  | 23.6875   | 7.97088    | 1         |
| cg02929961  | BIN3                     | 0.00010363        | 0.000103632          | 0.232587           | -4.29946                     | T down vs N                            | 26.174  | 19.9236   | 12.1791    | 1         |
| cg02930667  | CYP27A1                  | 0.0012959         | 0.0012959            | 0.247327           | -4.04323                     | T down vs N                            | 15.146  | 18.2802   | 19.3105    | 1         |
| cg02931247  | C1RL                     | 0.00270183        | 0.00270183           | 0.322785           | -3.09803                     | T down vs N                            | 12.558  | 11.9759   | 15.258     | 1         |
| cg02932854  | CCL24                    | 4.43E-06          | 4.43E-06             | 0.197968           | -5.05133                     | T down vs N                            | 45.949  | 24.57     | 8.55561    | 1         |
| cg02936263  | CCL7                     | 9.04E-05          | 9.04E-05             | 0.181263           | -5.51685                     | T down vs N                            | 26.877  | 27.3174   | 16.2622    | 1         |
| cg02938413  | ZAN;ZAN                  | 0.00012393        | 0.000123927          | 0.316766           | -3.1569                      | T down vs N                            | 25.271  | 12.3779   | 7.83689    | 1         |
| cg02938422  | LOC255025                | 0.00700168        | 0.00700168           | 0.330449           | -3.02618                     | T down vs N                            | 9.5581  | 11.484    | 19.2239    | 1         |
| cg02938601  | TNFRSF10C                | 0.00065103        | 0.000651027          | 5.41278            | 5.41278                      | T up vs N                              | 17.807  | 26.7115   | 24.0016    | 1         |
| cg02938926  | GPRC5B                   | 0.00020252        | 0.000202521          | 3.3112             | 3.3112                       | T up vs N                              | 22.894  | 13.4269   | 9.38367    | 1         |
| cg02940362  | MMP26                    | 1.98E-09          | 1.98E-09             | 0.122964           | -8.13246                     | T down vs N                            | 144.73  | 41.1422   | 4.54827    | 1         |
| cg02944007  | TSPAN10                  | 0.00188882        | 0.00188882           | 3.97773            | 3.97773                      | T up vs N                              | 13.788  | 17.8553   | 20.7196    | 1         |
| cg02944123  | CNTN4                    | 2.67E-05          | 2.67E-05             | 0.196304           | -5.09413                     | T down vs N                            | 33.728  | 24.8266   | 11.7774    | 1         |
| cg02944761  | MIR550-2                 | 9.73E-06          | 9.73E-06             | 0.313725           | -3.18751                     | T down vs N                            | 40.261  | 12.5866   | 5.00204    | 1         |
| cg02945019  | CD84                     | 0.00046435        | 0.000464353          | 0.290624           | -3.44087                     | T down vs N                            | 19.201  | 14.3022   | 11.9178    | 1         |
| cg02945266  | TOP3B                    | 0.00020076        | 0.000200763          | 0.331216           | -3.01918                     | T down vs N                            | 22.935  | 11.436    | 7.97805    | 1         |
| cg02946294  | PLEKHA7                  | 1.75E-05          | 1.75E-05             | 3.8369             | 3.8369                       | T up vs N                              | 36.372  | 16.9352   | 7.44967    | 1         |
| cg02947232  | FITM2                    | 0.00016468        | 0.000164682          | 0.25321            | -3.94929                     | T down vs N                            | 23.877  | 17.6702   | 11.8408    | 1         |
| cg02947670  | EFCAB5                   | 0.00027079        | 0.000270786          | 0.330583           | -3.02496                     | T down vs N                            | 21.557  | 11.4756   | 8.51761    | 1         |
| cg02952361  | ETV7                     | 6.76E-06          | 6.76E-06             | 10.4779            | 10.4779                      | T up vs N                              | 42.826  | 51.6923   | 19.3127    | 1         |
| cg02952701  | TET1                     | 0.00263097        | 0.00263097           | 0.188261           | -5.31177                     | T down vs N                            | 12.953  | 24.5825   | 28.4676    | 1         |
| cg02952703  | PTGER1                   | 1.31E-05          | 1.31E-05             | 4.85004            | 4.85004                      | T up vs N                              | 38.238  | 23.3517   | 9.77122    | 1         |
| cg02953302  | ADAM12;ADAM12            | 0.00117564        | 0.00117564           | 0.281869           | -3.54775                     | T down vs N                            | 15.508  | 15.0191   | 15.4952    | 1         |
| cg02953397  | ACAP3                    | 6.43E-07          | 6.43E-07             | 5.0485             | 5.0485                       | T up vs N                              | 62.557  | 24.553    | 6.27979    | 1         |
| cg02953927  | PDIA3;CATSPER2P1         | 0.00134679        | 0.00134679           | 4.99829            | 4.99829                      | T up vs N                              | 15.004  | 24.2507   | 25.86      | 1         |
| cg02956768  | C16orf74                 | 0.00011873        | 0.000118731          | 0.228843           | -4.3698                      | T down vs N                            | 25.486  | 20.3695   | 12.7881    | 1         |
| cg02959282  | NCK1                     | 0.00029464        | 0.00029464           | 0.248187           | -4.02922                     | T down vs N                            | 21.177  | 18.1895   | 13.7428    | 1         |
| cg02961707  | EVISL;EVISL              | 6.89E-06          | 6.89E-06             | 21.914             | 21.914                       | T up vs N                              | 42.684  | 89.2628   | 33.4598    | 1         |
| cg02965295  | ANKRD44                  | 0.00020879        | 0.000208786          | 0.264736           | -3.77734                     | T down vs N                            | 22.751  | 16.5434   | 11.6342    | 1         |
| cg02965895  | ORS1L1                   | 0.00035929        | 0.000359287          | 0.189255           | -5.28388                     | T down vs N                            | 20.301  | 25.9545   | 20.4555    | 1         |
| cg02967056  | GCET2;GCET2              | 0.00111258        | 0.00111258           | 0.195507           | -5.11491                     | T down vs N                            | 15.715  | 24.951    | 25.4028    | 1         |
| cg02973057  | SMTN;SMTN;SMTN           | 8.78E-07          | 8.78E-07             | 18.2884            | 18.2884                      | T up vs N                              | 59.593  | 79.1102   | 21.2402    | 1         |
| cg02976366  | OR4K1                    | 2.46E-06          | 2.46E-06             | 0.224677           | -4.45084                     | T down vs N                            | 50.585  | 20.8802   | 6.60444    | 1         |
| cg02979850  | ORSW2                    | 0.00032506        | 0.000325062          | 0.253115           | -3.95077                     | T down vs N                            | 20.74   | 17.6798   | 13.6389    | 1         |
| cg02980650  | SFMBT2                   | 0.00015355        | 0.000153545          | 0.222406           | -4.49627                     | T down vs N                            | 24.216  | 21.1653   | 13.9845    | 1         |
| cg02981092  | PDE12                    | 2.52E-05          | 2.52E-05             | 0.204301           | -4.89474                     | T down vs N                            | 34.075  | 23.6239   | 11.0928    | 1         |
| cg02981183  | PAX2;PAX2;PAX2;PAX2      | 9.52E-06          | 9.52E-06             | 0.211795           | -4.72154                     | T down vs N                            | 40.407  | 22.5642   | 8.93472    | 1         |
| cg02983451  | KLF11                    | 0.00712233        | 0.00712233           | 5.32777            | 5.32777                      | T up vs N                              | 9.5077  | 26.2131   | 44.1125    | 1         |
| cg02985568  | HSPA13                   | 0.00011892        | 0.000118919          | 0.258332           | -3.87099                     | T down vs N                            | 25.478  | 17.1587   | 10.7757    | 1         |
| cg02987249  | TRIP10                   | 0.0001849         | 0.000184902          | 0.312347           | -3.20157                     | T down vs N                            | 23.323  | 12.6823   | 8.70017    | 1         |
| cg02987387  | RYR1;RYR1                | 9.40E-05          | 9.40E-05             | 0.296081           | -3.37746                     | T down vs N                            | 26.678  | 13.8749   | 8.32133    | 1         |
| cg02987388  | CCDC17                   | 2.30E-05          | 2.30E-05             | 4.3563             | 4.3563                       | T up vs N                              | 34.649  | 20.2841   | 9.36669    | 1         |
| cg02987906  | FIP1L1;FIP1L1;FIP1L1     | 0.00086221        | 0.000862213          | 0.31731            | -3.15149                     | T down vs N                            | 16.692  | 12.341    | 11.8293    | 1         |
| cg02989381  | TCEANC                   | 7.22E-06          | 7.22E-06             | 0.198657           | -5.03381                     | T down vs N                            | 42.353  | 24.4647   | 9.24217    | 1         |
| cg02991888  | MIR1283-2;MIR516A1       | 2.43E-05          | 2.43E-05             | 0.277712           | -3.60085                     | T down vs N                            | 34.307  | 15.3736   | 7.16998    | 1         |
| cg02992645  | OVGP1                    | 3.12E-06          | 3.12E-06             | 0.255337           | -3.91639                     | T down vs N                            | 48.672  | 17.4557   | 5.73828    | 1         |
| cg02995061  | TRIM31                   | 0.00018514        | 0.00018514           | 0.312197           | -3.20311                     | T down vs N                            | 23.317  | 12.6928   | 8.70963    | 1         |
| cg02996471  | S1PR4                    | 2.23E-05          | 2.23E-05             | 0.143527           | -6.96732                     | T down vs N                            | 34.845  | 35.2952   | 16.2067    | 1         |
| cg02997295  | THBS2                    | 0.00199234        | 0.00199234           | 3.3159             | 3.3159                       | T up vs N                              | 13.601  | 13.4587   | 15.8325    | 1         |
| cg02998206  | IL13RA2                  | 7.12E-05          | 7.12E-05             | 0.2698             | -3.70645                     | T down vs N                            | 28.136  | 16.0751   | 9.14134    | 1         |
| cg03000585  | NEXN                     | 1.91E-07          | 1.91E-07             | 0.273733           | -3.6532                      | T down vs N                            | 75.233  | 15.7219   | 3.34361    | 1         |
| cg03000596  | LAT2;LAT2;LAT2;LAT2;LAT2 | 0.00020355        | 0.000203551          | 0.267388           | -3.73988                     | T down vs N                            | 22.87   | 16.2962   | 11.4008    | 1         |
| cg03001305  | STAT5A                   | 0.00015873        | 0.00015873           | 0.280633           | -3.56337                     | T down vs N                            | 24.055  | 15.1235   | 10.0594    | 1         |
| cg03002968  | OR6K2                    | 0.00190881        | 0.00190881           | 0.325807           | -3.0693                      | T down vs N                            | 13.751  | 11.7794   | 13.7058    | 1         |
| cg03003335  | ACAP3                    | 7.73E-05          | 7.73E-05             | 15.8176            | 15.8176                      | T up vs N                              | 27.703  | 71.4058   | 41.241     | 1         |
| cg03004598  | PRR15                    | 4.21E-06          | 4.21E-06             | 10.4562            | 10.4562                      | T up vs N                              | 46.34   | 51.6013   | 17.8167    | 1         |
| cg03008515  | OR11H6                   | 0.00015289        | 0.000152894          | 0.32957            | -3.03426                     | T down vs N                            | 24.236  | 11.5393   | 7.61789    | 1         |

| Probeset ID | UCSC_REFGENE_NAME                       | p-value<br>(Type) | p-value (T vs.<br>N) | Ratio (T<br>vs. N) | Fold-<br>Change (T<br>vs. N) | Fold-Change (T vs.<br>N) (Description) | F(Type) | SS (Type) | SS (Error) | F (Error) |
|-------------|-----------------------------------------|-------------------|----------------------|--------------------|------------------------------|----------------------------------------|---------|-----------|------------|-----------|
| cg03008550  | DDN                                     | 5.18E-06          | 5.18E-06             | 0.250792           | -3.98736                     | T down vs N                            | 44.779  | 17.9179   | 6.40228    | 1         |
| cg03009030  | HLA-DPA1                                | 5.01E-05          | 5.01E-05             | 0.2036             | -4.91158                     | T down vs N                            | 30.059  | 23.7261   | 12.6292    | 1         |
| cg03010761  | TXNRD1                                  | 0.00074497        | 0.000744973          | 0.316821           | -3.15636                     | T down vs N                            | 17.267  | 12.3742   | 11.4664    | 1         |
| cg03014622  | SEC14L4;SEC14L4                         | 6.20E-05          | 6.20E-05             | 3.70707            | 3.70707                      | T up vs N                              | 28.889  | 16.0792   | 8.90549    | 1         |
| cg03014957  | DEFB118                                 | 0.00048052        | 0.000480519          | 0.259899           | -3.84765                     | T down vs N                            | 19.057  | 17.0057   | 14.2776    | 1         |
| cg03016189  | SIN3A;SIN3A;SIN3A;SIN3A                 | 0.00337899        | 0.00337899           | 0.218681           | -4.57287                     | T down vs N                            | 13.26   | 16.8339   | 15.234     | 1         |
| cg03017653  | TTC13;TTC13;ARV1                        | 3.13E-05          | 3.13E-05             | 0.141948           | -7.04482                     | T down vs N                            | 32.784  | 35.6986   | 17.4224    | 1         |
| cg03018001  | C19orf21                                | 0.00010531        | 0.000105312          | 0.24032            | -4.16112                     | T down vs N                            | 26.092  | 19.0401   | 11.6756    | 1         |
| cg03019112  | MIR487A                                 | 0.00079358        | 0.000793584          | 0.275362           | -3.63159                     | T down vs N                            | 17.017  | 15.5782   | 14.6473    | 1         |
| cg03020891  | ABCF1;ABCF1                             | 5.81E-06          | 5.81E-06             | 0.271619           | -3.68163                     | T down vs N                            | 43.922  | 15.9106   | 5.79596    | 1         |
| cg03022680  | GP5                                     | 0.00030905        | 0.000309051          | 6.67654            | 6.67654                      | T up vs N                              | 20.964  | 33.762    | 25.7674    | 1         |
| cg03024301  | TRAM2                                   | 0.0003081         | 0.000308097          | 0.277873           | -3.59877                     | T down vs N                            | 20.978  | 15.3597   | 11.7149    | 1         |
| cg03025082  | OR7G3                                   | 0.00154484        | 0.00154484           | 0.298382           | -3.35141                     | T down vs N                            | 14.505  | 13.699    | 15.1114    | 1         |
| cg03026373  | SRCIN1                                  | 0.00125947        | 0.00125947           | 4.16251            | 4.16251                      | T up vs N                              | 15.252  | 19.0491   | 19.9835    | 1         |
| cg03027462  | TEX28;TKTL1;TKTL1                       | 0.00010393        | 0.000103931          | 0.227396           | -4.39762                     | T down vs N                            | 26.16   | 20.5452   | 12.5661    | 1         |
| cg03028337  | CCDC85A                                 | 0.00012144        | 0.000121436          | 3.72893            | 3.72893                      | T up vs N                              | 25.373  | 16.2239   | 10.2308    | 1         |
| cg03028529  | SEBOX;VTN                               | 2.52E-05          | 2.52E-05             | 0.256695           | -3.89568                     | T down vs N                            | 34.088  | 17.3203   | 8.12969    | 1         |
| cg03030267  | GNASAS;MIR298;MIR296                    | 3.72E-05          | 3.72E-05             | 0.277826           | -3.59937                     | T down vs N                            | 31.767  | 15.3637   | 7.73812    | 1         |
| cg03030757  | FANCE                                   | 7.29E-05          | 7.29E-05             | 0.261701           | -3.82116                     | T down vs N                            | 28.014  | 16.8318   | 9.61338    | 1         |
| cg03031009  | SFTA1P                                  | 1.93E-06          | 1.93E-06             | 0.19382            | -5.15943                     | T down vs N                            | 52.589  | 25.2166   | 7.67213    | 1         |
| cg03031234  | EXOC6                                   | 0.00012608        | 0.000126076          | 0.215164           | -4.64761                     | T down vs N                            | 25.185  | 22.1077   | 14.0448    | 1         |
| cg03031726  | PBX4                                    | 0.00440474        | 0.00440474           | 0.228261           | -4.38095                     | T down vs N                            | 10.971  | 20.4399   | 29.8105    | 1         |
| cg03032443  | MLLT1                                   | 0.00079182        | 0.000791816          | 0.251915           | -3.96959                     | T down vs N                            | 17.026  | 17.8024   | 16.7299    | 1         |
| cg03032677  | CDKN1A;CDKN1A                           | 0.00050414        | 0.00050414           | 0.304001           | -3.28946                     | T down vs N                            | 18.856  | 13.2796   | 11.2668    | 1         |
| cg03034759  | TMEM206                                 | 0.00102305        | 0.00102305           | 0.296882           | -3.36834                     | T down vs N                            | 16.033  | 13.8134   | 13.7847    | 1         |
| cg03035213  | ZNF469                                  | 1.04E-05          | 1.04E-05             | 11.0061            | 11.0061                      | T up vs N                              | 39.772  | 53.8793   | 21.675     | 1         |
| cg03036210  | SPIRE2                                  | 0.00225022        | 0.00225022           | 0.248468           | -4.02467                     | T down vs N                            | 13.179  | 18.16     | 22.0465    | 1         |
| cg03037030  | TNF                                     | 4.01E-05          | 4.01E-05             | 0.248079           | -4.03097                     | T down vs N                            | 31.331  | 18.2009   | 9.29469    | 1         |
| cg03039701  | SLC2A12                                 | 2.10E-07          | 2.10E-07             | 0.18321            | -5.45822                     | T down vs N                            | 74.172  | 26.9767   | 5.81927    | 1         |
| cg03039843  | SULT2B1                                 | 0.00015401        | 0.000154011          | 0.2826             | -3.53856                     | T down vs N                            | 24.201  | 14.9577   | 9.88899    | 1         |
| cg03040441  | C3orf66                                 | 0.00043997        | 0.000439966          | 0.325533           | -3.07188                     | T down vs N                            | 19.43   | 11.797    | 9.71469    | 1         |
| cg03043296  | AP3B2                                   | 3.64E-05          | 3.64E-05             | 12.6229            | 12.6229                      | T up vs N                              | 31.894  | 60.2134   | 30.2065    | 1         |
| cg03043406  | RPS8;SNORD38A                           | 1.31E-05          | 1.31E-05             | 0.252465           | -3.96095                     | T down vs N                            | 38.267  | 17.7461   | 7.41994    | 1         |
| cg03043417  | CD53;CD53;CD53                          | 7.43E-05          | 7.43E-05             | 0.251966           | -3.96879                     | T down vs N                            | 27.907  | 17.7972   | 10.2036    | 1         |
| cg03043804  | TCL1B;TCL1B                             | 0.00027612        | 0.000276119          | 0.20012            | -4.99699                     | T down vs N                            | 21.469  | 24.2429   | 18.0677    | 1         |
| cg03044376  | C20orf95                                | 1.50E-07          | 1.50E-07             | 0.19193            | -5.21023                     | T down vs N                            | 78.021  | 25.5187   | 5.23318    | 1         |
| cg03044471  | TOLLIP                                  | 0.00668625        | 0.00668625           | 3.34869            | 3.34869                      | T up vs N                              | 9.6947  | 13.6806   | 22.5783    | 1         |
| cg03044533  | MAML2                                   | 0.00243961        | 0.00243961           | 0.290015           | -3.4481                      | T down vs N                            | 12.903  | 14.3509   | 17.7952    | 1         |
| cg03045231  | ORS2N1                                  | 0.00141344        | 0.00141344           | 0.286914           | -3.48537                     | T down vs N                            | 14.827  | 14.6013   | 15.756     | 1         |
| cg03047059  | HHAT;HHAT;HHAT;HHAT;HHAT;HHAT           | 5.79E-05          | 5.79E-05             | 0.243564           | -4.10569                     | T down vs N                            | 29.258  | 18.6836   | 10.2174    | 1         |
| cg03048921  | ICOSLG                                  | 0.00190143        | 0.00190143           | 0.289391           | -3.45553                     | T down vs N                            | 13.765  | 14.4009   | 16.7394    | 1         |
| cg03048947  | LBR;LBR                                 | 6.34E-05          | 6.34E-05             | 0.231407           | -4.32139                     | T down vs N                            | 28.762  | 20.0628   | 11.1606    | 1         |
| cg03049691  | PROCA1                                  | 4.58E-05          | 4.58E-05             | 3.40976            | 3.40976                      | T up vs N                              | 30.574  | 14.0928   | 7.37507    | 1         |
| cg03050022  | RAB27A;RAB27A;RAB27A;RAB27A             | 1.01E-06          | 1.01E-06             | 0.211532           | -4.72742                     | T down vs N                            | 58.295  | 22.6004   | 6.203      | 1         |
| cg03050127  | BCAS3;BCAS3                             | 0.00013514        | 0.000135143          | 0.234656           | -4.26156                     | T down vs N                            | 24.841  | 19.6824   | 12.6774    | 1         |
| cg03050684  | UCK2                                    | 3.86E-05          | 3.86E-05             | 0.231968           | -4.31094                     | T down vs N                            | 31.541  | 19.9965   | 10.1438    | 1         |
| cg03051617  | RSAD1                                   | 0.00030437        | 0.000304373          | 0.25702            | -3.89074                     | T down vs N                            | 21.032  | 17.288    | 13.1518    | 1         |
| cg03054277  | OBSCN;OBSCN                             | 0.00072269        | 0.000722693          | 4.38132            | 4.38132                      | T up vs N                              | 17.388  | 20.4422   | 18.8109    | 1         |
| cg03055693  | LAMA5                                   | 6.17E-06          | 6.17E-06             | 0.305718           | -3.27099                     | T down vs N                            | 43.489  | 13.1542   | 4.83956    | 1         |
| cg03057216  | VPS72;TMOD4                             | 0.00162881        | 0.00162881           | 0.329131           | -3.0383                      | T down vs N                            | 14.314  | 11.5671   | 12.9295    | 1         |
| cg03058660  | GRIN2D                                  | 5.85E-05          | 5.85E-05             | 3.97237            | 3.97237                      | T up vs N                              | 29.203  | 17.8204   | 9.7638     | 1         |
| cg03059247  | C8orf12;FAM167A                         | 0.00474081        | 0.00474081           | 0.326398           | -3.06374                     | T down vs N                            | 10.741  | 11.7413   | 17.4908    | 1         |
| cg03059876  | ARFGAP1;ARFGAP1                         | 1.45E-05          | 1.45E-05             | 0.272527           | -3.66936                     | T down vs N                            | 37.569  | 15.8292   | 6.74142    | 1         |
| cg03061764  | OR6A2;OR6A2                             | 0.00066779        | 0.00066779           | 0.322232           | -3.10335                     | T down vs N                            | 17.704  | 12.0123   | 10.8561    | 1         |
| cg03062252  | MDGA1                                   | 0.00039847        | 0.000398466          | 8.07755            | 8.07755                      | T up vs N                              | 19.853  | 40.8767   | 32.9433    | 1         |
| cg03062717  | FFAR2                                   | 0.00024924        | 0.000249239          | 0.230601           | -4.33649                     | T down vs N                            | 21.933  | 20.1586   | 14.7054    | 1         |
| cg03065503  | STX18                                   | 0.00011301        | 0.000113013          | 0.286992           | -3.48442                     | T down vs N                            | 25.734  | 14.5949   | 9.07426    | 1         |
| cg03066050  | KLF4                                    | 6.81E-06          | 6.81E-06             | 9.03541            | 9.03541                      | T up vs N                              | 42.772  | 45.3797   | 16.9753    | 1         |
| cg03066618  | SKIV2L                                  | 8.28E-05          | 8.28E-05             | 0.296677           | -3.37067                     | T down vs N                            | 27.336  | 13.8291   | 8.09419    | 1         |
| cg03068068  | ZBTB32                                  | 0.00143395        | 0.00143395           | 0.240268           | -4.16202                     | T down vs N                            | 14.775  | 19.0459   | 20.6253    | 1         |
| cg03072740  | OR10P1                                  | 0.0003576         | 0.000357599          | 0.323915           | -3.08723                     | T down vs N                            | 20.322  | 11.902    | 9.37082    | 1         |
| cg03072984  | RFX4                                    | 0.00140859        | 0.00140859           | 6.2572             | 6.2572                       | T up vs N                              | 14.84   | 31.4944   | 33.9565    | 1         |
| cg03073786  | GCM2                                    | 3.52E-06          | 3.52E-06             | 0.183241           | -5.4573                      | T down vs N                            | 47.737  | 26.9713   | 9.04003    | 1         |
| cg03078488  | IGF2BP3                                 | 4.24E-07          | 4.24E-07             | 0.084663           | -11.8115                     | T down vs N                            | 66.687  | 57.0993   | 13.6996    | 1         |
| cg03082060  | LGALS8                                  | 0.00031155        | 0.00031155           | 0.322971           | -3.09625                     | T down vs N                            | 20.928  | 11.9637   | 9.14641    | 1         |
| cg03082589  | GSG1L;GSG1L                             | 0.00020571        | 0.00020571           | 0.221145           | -4.52191                     | T down vs N                            | 22.821  | 21.3257   | 14.9517    | 1         |
| cg03084710  | ENSA;ENSA;ENSA;ENSA;ENSA;ENSA;ENSA;ENSA | 2.17E-06          | 2.17E-06             | 0.184156           | -5.43018                     | T down vs N                            | 51.635  | 26.8132   | 8.30845    | 1         |
| cg03085712  | ATP2C2                                  | 4.30E-05          | 4.30E-05             | 4.24764            | 4.24764                      | T up vs N                              | 30.924  | 19.5937   | 10.1376    | 1         |

| Probeset ID                   | UCSC_REFGENE_NAME               | p-value<br>(Type) | p-value (T vs.<br>N) | Ratio (T<br>vs. N) | Fold-<br>Change (T<br>vs. N) | Fold-Change (T vs.<br>N) (Description) | F(Type) | SS (Type) | SS (Error) | F (Error) |
|-------------------------------|---------------------------------|-------------------|----------------------|--------------------|------------------------------|----------------------------------------|---------|-----------|------------|-----------|
| PCDHGA4;PCDHGA2;PCDHGB2;PCDHG |                                 |                   |                      |                    |                              |                                        |         |           |            |           |
| cg03086707                    | A1;PCDHGB1;PCDHGA3;PCDHGB2      | 0.00729243        | 0.00729243           | 3.45865            | 3.45865                      | T up vs N                              | 9.4383  | 14.4218   | 24.4481    | 1         |
| cg03089870                    | KIF13A;KIF13A;KIF13A;KIF13A     | 0.00041294        | 0.000412936          | 0.329134           | -3.03827                     | T down vs N                            | 19.7    | 11.5669   | 9.39441    | 1         |
| cg03095103                    | VAV2;VAV2                       | 8.48E-06          | 8.48E-06             | 0.29648            | -3.37291                     | T down vs N                            | 41.212  | 13.8442   | 5.37485    | 1         |
| cg03096732                    | SLC16A11                        | 0.00368448        | 0.00368448           | 3.0181             | 3.0181                       | T up vs N                              | 11.539  | 11.4286   | 15.8474    | 1         |
| cg03096746                    | HLA-G                           | 1.32E-06          | 1.32E-06             | 5.07938            | 5.07938                      | T up vs N                              | 55.914  | 24.7383   | 7.079      | 1         |
| cg03096803                    | ST6GALNAC1                      | 3.62E-07          | 3.62E-07             | 0.226454           | -4.4159                      | T down vs N                            | 68.327  | 20.6604   | 4.83798    | 1         |
| cg03097190                    | BPIL2                           | 1.99E-05          | 1.99E-05             | 0.324003           | -3.08639                     | T down vs N                            | 35.548  | 11.8963   | 5.35448    | 1         |
| cg03097995                    | TNNI3;TNNI3                     | 7.42E-06          | 7.42E-06             | 0.286204           | -3.49401                     | T down vs N                            | 42.152  | 14.6592   | 5.56432    | 1         |
| cg03098629                    | MCM8;TRMT6;MCM8                 | 7.42E-05          | 7.42E-05             | 0.13279            | -7.53071                     | T down vs N                            | 27.914  | 38.1795   | 21.8841    | 1         |
| cg03099728                    | ZNF274;ZNF274;ZNF274            | 0.00043018        | 0.000430177          | 3.51818            | 3.51818                      | T up vs N                              | 19.525  | 14.8212   | 12.1452    | 1         |
| cg03099771                    | PRSS16                          | 1.57E-06          | 1.57E-06             | 0.205862           | -4.85763                     | T down vs N                            | 54.395  | 23.398    | 6.88246    | 1         |
| cg03100209                    | CCDC155                         | 0.00028749        | 0.000287494          | 0.273003           | -3.66296                     | T down vs N                            | 21.287  | 15.7867   | 11.8659    | 1         |
| cg03103611                    | UTP11L                          | 2.01E-06          | 2.01E-06             | 0.133809           | -7.47335                     | T down vs N                            | 52.287  | 37.8908   | 11.5948    | 1         |
| cg03105244                    | NCK2;NCK2;NCK2                  | 0.00060044        | 0.000600443          | 0.286074           | -3.4956                      | T down vs N                            | 18.135  | 14.6699   | 12.943     | 1         |
| cg03106056                    | 4-Mar                           | 2.80E-05          | 2.80E-05             | 0.31672            | -3.15736                     | T down vs N                            | 33.447  | 12.3811   | 5.92274    | 1         |
| cg03108070                    | B3GALT4                         | 0.00019268        | 0.000192676          | 5.00173            | 5.00173                      | T up vs N                              | 23.129  | 24.2715   | 16.7907    | 1         |
| cg03108250                    | KIR3DX1                         | 4.52E-05          | 4.52E-05             | 0.233578           | -4.28122                     | T down vs N                            | 30.644  | 19.8076   | 10.3422    | 1         |
| cg03108373                    | ZNF804B                         | 1.56E-06          | 1.56E-06             | 0.222338           | -4.49766                     | T down vs N                            | 54.449  | 21.1739   | 6.22201    | 1         |
| cg03109660                    | RELL1;RELL1                     | 0.0011104         | 0.0011104            | 0.291165           | -3.43448                     | T down vs N                            | 15.723  | 14.2593   | 14.5107    | 1         |
| cg03110082                    | ANKRD33;ANKRD33;ANKRD33         | 3.73E-05          | 3.73E-05             | 3.18234            | 3.18234                      | T up vs N                              | 31.748  | 12.5514   | 6.32557    | 1         |
|                               |                                 |                   |                      |                    |                              |                                        |         |           |            |           |
| cg03110310                    | ZNF205;ZNF205;MGC3771;MGC3771   | 0.00377623        | 0.00377623           | 0.221716           | -4.51028                     | T down vs N                            | 11.46   | 21.253    | 29.6736    | 1         |
| cg03110722                    | CEACAM18                        | 8.93E-05          | 8.93E-05             | 0.30067            | -3.32591                     | T down vs N                            | 26.94   | 13.5265   | 8.03363    | 1         |
| cg03111818                    | H2AFJ;H2AFJ                     | 0.00637123        | 0.00637123           | 3.21945            | 3.21945                      | T up vs N                              | 9.8385  | 12.804    | 20.8226    | 1         |
| cg03113871                    | C22orf27                        | 1.33E-06          | 1.33E-06             | 0.122523           | -8.16175                     | T down vs N                            | 55.831  | 41.2834   | 11.8311    | 1         |
| cg03113878                    | C7orf51                         | 0.00583675        | 0.00583675           | 0.243765           | -4.10232                     | T down vs N                            | 10.102  | 18.6619   | 29.557     | 1         |
| cg03115019                    | FN3K                            | 0.00181565        | 0.00181565           | 3.22826            | 3.22826                      | T up vs N                              | 13.927  | 12.864    | 14.7783    | 1         |
| cg03115558                    | NODAL                           | 2.56E-05          | 2.56E-05             | 9.51096            | 9.51096                      | T up vs N                              | 33.989  | 47.5193   | 22.369     | 1         |
| cg03116258                    | HOXA1;HOXA1                     | 4.19E-05          | 4.19E-05             | 4.36394            | 4.36394                      | T up vs N                              | 31.069  | 20.3324   | 10.4708    | 1         |
| cg03119748                    | CAMK1D;CAMK1D                   | 1.54E-05          | 1.54E-05             | 0.29761            | -3.3601                      | T down vs N                            | 37.18   | 13.7577   | 5.92053    | 1         |
| cg03120102                    | WWOX                            | 0.00023668        | 0.000236675          | 0.263733           | -3.79171                     | T down vs N                            | 22.17   | 16.6381   | 12.0075    | 1         |
| cg03122455                    | HLA-J;NCRNA00171                | 0.00018614        | 0.00018614           | 3.25324            | 3.25324                      | T up vs N                              | 23.292  | 13.0337   | 8.95337    | 1         |
| cg03125341                    | ZDHHC14;ZDHHC14                 | 2.24E-06          | 2.24E-06             | 0.290374           | -3.44384                     | T down vs N                            | 51.376  | 14.3222   | 4.46035    | 1         |
| cg03125427                    | CYBA                            | 4.03E-06          | 4.03E-06             | 31.0004            | 31.0004                      | T up vs N                              | 46.67   | 110.449   | 37.8656    | 1         |
| cg03127506                    | HLA-DQA2                        | 0.00018903        | 0.000189032          | 0.269089           | -3.71624                     | T down vs N                            | 23.219  | 16.1399   | 11.122     | 1         |
| cg03128268                    | RBM3                            | 0.00469351        | 0.00469351           | 0.315552           | -3.16905                     | T down vs N                            | 10.772  | 12.4608   | 18.5087    | 1         |
| cg03129645                    | MOXD2                           | 0.00092882        | 0.00092882           | 0.274734           | -3.63988                     | T down vs N                            | 16.404  | 15.6334   | 15.2487    | 1         |
| cg03129774                    | CLUAP1                          | 0.00040342        | 0.000403421          | 0.312419           | -3.20083                     | T down vs N                            | 20.468  | 11.9316   | 8.74411    | 1         |
| cg03129884                    | MAL;MAL;MAL;MAL                 | 1.77E-05          | 1.77E-05             | 13.236             | 13.236                       | T up vs N                              | 36.305  | 62.487    | 27.5389    | 1         |
| cg03131171                    | MDGA1                           | 0.0002414         | 0.000241396          | 5.55549            | 5.55549                      | T up vs N                              | 22.08   | 27.5411   | 19.9577    | 1         |
| cg03132166                    | FAM83F                          | 0.00013783        | 0.000137827          | 8.40009            | 8.40009                      | T up vs N                              | 24.744  | 42.4233   | 27.4318    | 1         |
| cg03132824                    | RGS12;RGS12;RGS12               | 0.00347305        | 0.00347305           | 0.167537           | -5.96884                     | T down vs N                            | 11.73   | 29.8946   | 40.778     | 1         |
| cg03133198                    | DOCK6                           | 1.26E-05          | 1.26E-05             | 0.269208           | -3.7146                      | T down vs N                            | 38.525  | 16.129    | 6.69858    | 1         |
| cg03134947                    | LAT;LAT;LAT;LAT                 | 1.53E-06          | 1.53E-06             | 0.308603           | -3.24041                     | T down vs N                            | 54.626  | 12.9466   | 3.79203    | 1         |
| cg03135535                    | TBC1D9                          | 9.94E-06          | 9.94E-06             | 4.98522            | 4.98522                      | T up vs N                              | 40.114  | 24.1719   | 9.64133    | 1         |
| cg03136781                    | ATG16L1;ATG16L1;SCARNA6         | 0.00613177        | 0.00613177           | 3.01253            | 3.01253                      | T up vs N                              | 9.9534  | 11.3904   | 18.31      | 1         |
| cg03139053                    | SATB2                           | 0.00344904        | 0.00344904           | 0.220022           | -4.545                       | T down vs N                            | 11.752  | 21.4699   | 29.2301    | 1         |
|                               |                                 |                   |                      |                    |                              |                                        |         |           |            |           |
| cg03139377                    | SLC6A12;SLC6A12;SLC6A12;SLC6A12 | 2.46E-06          | 2.46E-06             | 0.32615            | -3.06608                     | T down vs N                            | 50.597  | 11.7573   | 3.71793    | 1         |
| cg03140135                    | EMP1                            | 1.33E-06          | 1.33E-06             | 0.241869           | -4.13448                     | T down vs N                            | 55.842  | 18.8689   | 5.40642    | 1         |
| cg03140412                    | SIGIRR;SIGIRR;SIGIRR            | 1.55E-05          | 1.55E-05             | 0.21655            | -4.61787                     | T down vs N                            | 37.154  | 21.9233   | 9.44119    | 1         |
| cg03141298                    | TMEM71;TMEM71                   | 1.44E-05          | 1.44E-05             | 0.20113            | -4.97191                     | T down vs N                            | 37.631  | 24.0915   | 10.2434    | 1         |
| cg03141679                    | PROX1                           | 2.08E-05          | 2.08E-05             | 0.171073           | -5.84547                     | T down vs N                            | 35.259  | 29.1998   | 13.2505    | 1         |
|                               |                                 |                   |                      |                    |                              |                                        |         |           |            |           |
| cg03142975                    | MRRF;MRRF;RBM18;RBM18;RBM18     | 2.36E-05          | 2.36E-05             | 0.240646           | -4.15548                     | T down vs N                            | 34.494  | 19.0039   | 8.81501    | 1         |
| cg03143849                    | CDKN1C;CDKN1C;CDKN1C            | 4.11E-05          | 4.11E-05             | 0.252173           | -3.96554                     | T down vs N                            | 31.184  | 17.776    | 9.12053    | 1         |
| cg03144753                    | CMC1                            | 8.26E-05          | 8.26E-05             | 0.322798           | -3.09791                     | T down vs N                            | 27.351  | 11.9751   | 7.00517    | 1         |
| cg03145930                    | RHOA                            | 2.88E-05          | 2.88E-05             | 0.205239           | -4.87237                     | T down vs N                            | 33.267  | 23.4878   | 11.2965    | 1         |
| cg03146196                    | DEFB122                         | 0.0001201         | 0.000120099          | 0.284765           | -3.51166                     | T down vs N                            | 25.428  | 14.7776   | 9.29842    | 1         |
| cg03147184                    | NPHS1                           | 4.94E-05          | 4.94E-05             | 0.227553           | -4.39458                     | T down vs N                            | 30.142  | 20.526    | 10.8955    | 1         |
| cg03147185                    | NCAPH                           | 1.08E-05          | 1.08E-05             | 0.21585            | -4.63285                     | T down vs N                            | 39.548  | 22.0163   | 8.90712    | 1         |
| cg03148457                    | PDZRN3                          | 0.00011664        | 0.000116636          | 0.248918           | -4.01738                     | T down vs N                            | 25.575  | 18.1128   | 11.3316    | 1         |
| cg03148858                    | TLE2                            | 0.00061778        | 0.000617782          | 0.258546           | -3.86778                     | T down vs N                            | 18.019  | 17.1377   | 15.2176    | 1         |
| cg03149560                    | HLA-G                           | 0.00012687        | 0.00012687           | 7.03356            | 7.03356                      | T up vs N                              | 26.162  | 33.5436   | 19.2324    | 1         |
| cg03150515                    | EBF2                            | 0.00144579        | 0.00144579           | 0.252141           | -3.96604                     | T down vs N                            | 14.745  | 17.7792   | 19.2927    | 1         |
| cg03150622                    | EPHA1                           | 0.00285781        | 0.00285781           | 12.6517            | 12.6517                      | T up vs N                              | 12.371  | 60.3216   | 78.0187    | 1         |
| cg03151529                    | DNAH10                          | 0.00022986        | 0.000229855          | 0.251424           | -3.97734                     | T down vs N                            | 22.305  | 17.8528   | 12.8063    | 1         |
| cg03155112                    | TNS3                            | 0.00134389        | 0.00134389           | 0.239818           | -4.16983                     | T down vs N                            | 15.012  | 19.096    | 20.3524    | 1         |
| cg03156546                    | TNRC6A                          | 0.00120869        | 0.00120869           | 0.30219            | -3.30917                     | T down vs N                            | 15.405  | 13.4131   | 13.9313    | 1         |
| cg03158561                    | RPL27A;SNORA45                  | 7.81E-07          | 7.81E-07             | 0.206821           | -4.8351                      | T down vs N                            | 60.697  | 23.2605   | 6.13156    | 1         |

| Probeset ID                   | UCSC_REFGENE_NAME       | p-value<br>(Type) | p-value (T vs.<br>N) | Ratio (T<br>vs. N) | Fold-<br>Change (T<br>vs. N) | Fold-Change (T vs.<br>N) (Description) | F(Type) | SS (Type) | SS (Error) | F (Error) |
|-------------------------------|-------------------------|-------------------|----------------------|--------------------|------------------------------|----------------------------------------|---------|-----------|------------|-----------|
| cg03160526                    | B3GNTL1                 | 0.00399572        | 0.00399572           | 0.32835            | -3.04553                     | T down vs N                            | 11.279  | 11.6166   | 16.479     | 1         |
| cg03162823                    | USP44;USP44             | 0.00114915        | 0.00114915           | 0.251835           | -3.97085                     | T down vs N                            | 15.594  | 17.8105   | 18.2745    | 1         |
| cg03163302                    | RNF222                  | 0.00023362        | 0.000233621          | 0.154091           | -6.48969                     | T down vs N                            | 22.23   | 32.7601   | 23.5789    | 1         |
| cg03163459                    | ZBED3                   | 0.00040916        | 0.000409157          | 15.0433            | 15.0433                      | T up vs N                              | 19.739  | 68.8334   | 55.7938    | 1         |
| cg03165260                    | GPR50                   | 0.00027369        | 0.000273694          | 0.149963           | -6.66832                     | T down vs N                            | 21.508  | 33.7182   | 25.083     | 1         |
| cg03166508                    | PAPSS2;PAPSS2           | 7.15E-05          | 7.15E-05             | 0.252092           | -3.96681                     | T down vs N                            | 28.115  | 17.7843   | 10.1207    | 1         |
| cg03166566                    | RHOD                    | 1.62E-05          | 1.62E-05             | 16.2119            | 16.2119                      | T up vs N                              | 36.841  | 72.6851   | 31.5673    | 1         |
| cg03167763                    | UBXN10                  | 4.42E-05          | 4.42E-05             | 4.3535             | 4.3535                       | T up vs N                              | 30.771  | 20.2663   | 10.5381    | 1         |
| cg03168249                    | KAZALD1                 | 4.26E-05          | 4.26E-05             | 7.34086            | 7.34086                      | T up vs N                              | 30.982  | 37.2199   | 19.2217    | 1         |
| cg03169836                    | CIB3                    | 1.98E-07          | 1.98E-07             | 0.243729           | -4.10291                     | T down vs N                            | 74.864  | 18.6657   | 3.98926    | 1         |
| cg03171465                    | C2orf55                 | 1.65E-05          | 1.65E-05             | 7.09173            | 7.09173                      | T up vs N                              | 36.744  | 35.9418   | 15.6506    | 1         |
| cg03176550                    | CIB;LAT;LAT;LAT         | 1.81E-05          | 1.81E-05             | 0.304524           | -3.28381                     | T down vs N                            | 36.164  | 13.2413   | 5.85836    | 1         |
| cg03177551                    | ITPKA                   | 3.15E-05          | 3.15E-05             | 5.63643            | 5.63643                      | T up vs N                              | 32.736  | 28.0077   | 13.689     | 1         |
| cg03178489                    | OR9G4                   | 8.83E-06          | 8.83E-06             | 0.114196           | -8.75688                     | T down vs N                            | 40.932  | 44.0978   | 17.2377    | 1         |
| cg03179291                    | CAMKK1;CAMKK1;CAMKK1    | 0.00010474        | 0.000104744          | 5.33829            | 5.33829                      | T up vs N                              | 26.12   | 26.275    | 16.0951    | 1         |
| cg03182958                    | SGPP2                   | 1.98E-05          | 1.98E-05             | 6.0908             | 6.0908                       | T up vs N                              | 35.584  | 30.5754   | 13.7479    | 1         |
| cg03185453                    | NCRNA00171              | 0.00068381        | 0.000683806          | 0.228452           | -4.37728                     | T down vs N                            | 17.609  | 20.4167   | 18.5515    | 1         |
| cg03185704                    | LRR61;ACTR3C;LRR61      | 0.00156097        | 0.00156097           | 3.87472            | 3.87472                      | T up vs N                              | 14.467  | 17.1832   | 19.0039    | 1         |
| cg03186486                    | FAM19A4;FAM19A4         | 0.0022745         | 0.0022745            | 9.79902            | 9.79902                      | T up vs N                              | 13.143  | 48.7866   | 59.3936    | 1         |
| cg03187444                    | SYN3                    | 5.91E-06          | 5.91E-06             | 0.267391           | -3.73984                     | T down vs N                            | 43.805  | 16.2959   | 5.95225    | 1         |
| cg03187614                    | TRIM10;TRIM10           | 0.00068952        | 0.000689517          | 0.201136           | -4.97177                     | T down vs N                            | 17.575  | 24.0907   | 21.9314    | 1         |
| cg03187668                    | OR4C6                   | 0.00074697        | 0.000746969          | 0.237518           | -4.2102                      | T down vs N                            | 17.256  | 19.3546   | 17.9457    | 1         |
| cg03187795                    | EARS2;EARS2             | 0.00062591        | 0.000625905          | 0.294312           | -3.39775                     | T down vs N                            | 17.966  | 14.0119   | 12.4787    | 1         |
| cg03188793                    | TALD01                  | 0.00079072        | 0.000790721          | 0.253344           | -3.9472                      | T down vs N                            | 17.031  | 17.6566   | 16.5876    | 1         |
| cg03189210                    | B3GALT4                 | 0.00126092        | 0.00126092           | 3.63277            | 3.63277                      | T up vs N                              | 15.248  | 15.5861   | 16.3552    | 1         |
| cg03189990                    | NTM                     | 0.00165709        | 0.00165709           | 6.5973             | 6.5973                       | T up vs N                              | 14.252  | 33.3387   | 37.4266    | 1         |
| cg03190018                    | PRKAG2;PRKAG2           | 1.63E-05          | 1.63E-05             | 0.298525           | -3.34981                     | T down vs N                            | 36.819  | 13.6881   | 5.94829    | 1         |
| cg03190379                    | PRPH                    | 0.00225684        | 0.00225684           | 4.43118            | 4.43118                      | T up vs N                              | 13.169  | 20.7566   | 25.2181    | 1         |
| cg03191504                    | RNF149                  | 0.00115135        | 0.00115135           | 0.249423           | -4.00926                     | T down vs N                            | 15.587  | 18.0601   | 18.5391    | 1         |
| cg03192231                    | ARPP-21                 | 0.00387945        | 0.00387945           | 3.68426            | 3.68426                      | T up vs N                              | 11.373  | 15.9281   | 22.4079    | 1         |
| cg03194442                    | GPR123                  | 0.00017701        | 0.000177013          | 0.23671            | -4.22459                     | T down vs N                            | 23.531  | 19.4465   | 13.2228    | 1         |
| PAX8;PAX8;PAX8;PAX8;LOC4408   |                         |                   |                      |                    |                              |                                        |         |           |            |           |
| cg03197992                    | 39                      | 0.00042973        | 0.000429727          | 0.266176           | -3.75691                     | T down vs N                            | 19.53   | 16.4087   | 13.443     | 1         |
| cg03198578                    | TMC4;TMC4               | 0.00593454        | 0.00593454           | 4.37358            | 4.37358                      | T up vs N                              | 10.052  | 20.3933   | 32.4607    | 1         |
| cg03199005                    | PRHOXNB                 | 3.91E-07          | 3.91E-07             | 0.25085            | -3.98644                     | T down vs N                            | 67.517  | 17.9119   | 4.24474    | 1         |
| cg03199564                    | CYTL1                   | 0.00019507        | 0.000195072          | 0.198229           | -5.04467                     | T down vs N                            | 23.07   | 24.53     | 17.0124    | 1         |
| cg03199926                    | OSBPL2;OSBPL2           | 0.00156585        | 0.00156585           | 0.297293           | -3.36368                     | T down vs N                            | 14.456  | 13.7819   | 15.2541    | 1         |
| cg03200309                    | H1FNT;H1FNT             | 0.00447524        | 0.00447524           | 0.288871           | -3.46175                     | T down vs N                            | 10.921  | 14.4427   | 21.16      | 1         |
| cg03205046                    | MYT1L                   | 1.24E-06          | 1.24E-06             | 0.279114           | -3.58277                     | T down vs N                            | 56.446  | 15.253    | 4.32361    | 1         |
| cg03206537                    | CTSA;CTSA;CTSA          | 0.00049453        | 0.000494525          | 0.263412           | -3.79633                     | T down vs N                            | 18.937  | 16.6685   | 14.0835    | 1         |
| cg03207915                    | MAN1A1                  | 5.82E-05          | 5.82E-05             | 0.291815           | -3.42683                     | T down vs N                            | 29.235  | 14.2078   | 7.77588    | 1         |
| cg03207987                    | OR5T2                   | 0.00043724        | 0.000437235          | 0.192821           | -5.18615                     | T down vs N                            | 19.456  | 25.3757   | 20.8681    | 1         |
| cg03208426                    | CYP26C1                 | 0.00083764        | 0.000837644          | 3.81436            | 3.81436                      | T up vs N                              | 16.805  | 16.7871   | 15.983     | 1         |
| cg03208902                    | OR1F2P                  | 0.00060144        | 0.000601442          | 0.227105           | -4.40326                     | T down vs N                            | 18.128  | 20.5807   | 18.1647    | 1         |
| cg03208951                    | EMP3;EMP3               | 0.00011714        | 0.000117138          | 0.205466           | -4.86699                     | T down vs N                            | 25.553  | 23.455    | 14.6861    | 1         |
| cg03208983                    | MAGOH8                  | 1.86E-06          | 1.86E-06             | 0.177263           | -5.64132                     | T down vs N                            | 52.921  | 28.0358   | 8.47621    | 1         |
| cg03209871                    | RCHY1;RCHY1;RCHY1;THAP6 | 0.00042568        | 0.000425682          | 0.256979           | -3.89137                     | T down vs N                            | 19.57   | 17.2921   | 14.1376    | 1         |
| cg03210257                    | LBXORCH1                | 0.00289439        | 0.00289439           | 6.23642            | 6.23642                      | T up vs N                              | 12.328  | 31.3803   | 40.7259    | 1         |
| cg03212131                    | SLC45A2;SLC45A2         | 3.24E-06          | 3.24E-06             | 0.325301           | -3.07407                     | T down vs N                            | 48.387  | 11.812    | 3.90589    | 1         |
| cg03213502                    | ARR3;RAB41              | 0.0027217         | 0.0027217            | 0.26632            | -3.75488                     | T down vs N                            | 12.534  | 16.3953   | 20.9294    | 1         |
| cg03214420                    | C19orf61                | 0.00393389        | 0.00393389           | 0.33005            | -3.02985                     | T down vs N                            | 11.329  | 11.5091   | 16.2548    | 1         |
| cg03214697                    | SEC14L4;SEC14L4         | 0.00018845        | 0.000188453          | 4.73634            | 4.73634                      | T up vs N                              | 23.223  | 22.6553   | 15.602     | 1         |
| cg03215160                    | OR2H1                   | 0.00405169        | 0.00405169           | 0.331324           | -3.0182                      | T down vs N                            | 11.235  | 11.4293   | 16.2771    | 1         |
| cg03215181                    | TRPC3                   | 0.00010508        | 0.00010508           | 0.242391           | -4.12556                     | T down vs N                            | 26.103  | 18.8116   | 11.5305    | 1         |
| cg03221914                    | HIST1H2AJ               | 0.00022017        | 0.000220172          | 5.023              | 5.023                        | T up vs N                              | 22.504  | 24.3997   | 17.3477    | 1         |
| cg03222483                    | PGLYRP3                 | 0.00423156        | 0.00423156           | 0.325345           | -3.07366                     | T down vs N                            | 11.097  | 11.8092   | 17.0268    | 1         |
| cg03222523                    | MS4A10                  | 6.43E-05          | 6.43E-05             | 0.248979           | -4.0164                      | T down vs N                            | 28.69   | 18.1064   | 10.0977    | 1         |
| cg03222965                    | GCM2                    | 4.95E-05          | 4.95E-05             | 0.296083           | -3.37743                     | T down vs N                            | 30.135  | 13.8747   | 7.36683    | 1         |
| cg03224901                    | C2orf89                 | 0.00013679        | 0.000136792          | 0.28653            | -3.49004                     | T down vs N                            | 24.781  | 14.6326   | 9.44759    | 1         |
| cg03225502                    | CA1;CA1;CA1;CA1;CA1     | 1.33E-06          | 1.33E-06             | 0.199758           | -5.00606                     | T down vs N                            | 55.814  | 24.2976   | 6.96538    | 1         |
| cg03225548                    | FBXO15;FBXO15           | 1.45E-05          | 1.45E-05             | 0.33189            | -3.01304                     | T down vs N                            | 37.574  | 11.3939   | 4.85188    | 1         |
| cg03225787                    | OR6Y1                   | 7.03E-05          | 7.03E-05             | 0.288349           | -3.46802                     | T down vs N                            | 28.204  | 14.4848   | 8.21703    | 1         |
| cg03226887                    | CREB5;CREB5;CREB5       | 9.93E-05          | 9.93E-05             | 0.192748           | -5.18813                     | T down vs N                            | 26.392  | 25.3874   | 15.3909    | 1         |
| cg03227104                    | CBFA2T3                 | 1.43E-05          | 1.43E-05             | 0.231676           | -4.31638                     | T down vs N                            | 37.652  | 20.0311   | 8.5122     | 1         |
| CEACAM19;CEACAM19;CEACAM19;CE |                         |                   |                      |                    |                              |                                        |         |           |            |           |
| cg03228555                    | ACAM19                  | 1.53E-05          | 1.53E-05             | 0.220956           | -4.52578                     | T down vs N                            | 37.218  | 21.3499   | 9.1782     | 1         |
| cg03228943                    | LOC150185               | 2.34E-09          | 2.34E-09             | 0.310081           | -3.22497                     | T down vs N                            | 141.5   | 12.8416   | 1.45202    | 1         |
| cg03230858                    | C19orf21                | 2.32E-05          | 2.32E-05             | 0.309539           | -3.23061                     | T down vs N                            | 34.583  | 12.8799   | 5.95901    | 1         |
| cg03231596                    | DLC1;DLC1               | 2.81E-05          | 2.81E-05             | 0.321321           | -3.11215                     | T down vs N                            | 33.421  | 12.0724   | 5.77948    | 1         |
| cg03232443                    | SNTG2                   | 0.00036096        | 0.000360961          | 0.246542           | -4.0561                      | T down vs N                            | 20.281  | 18.3635   | 14.4872    | 1         |
| cg03234702                    | HIST1H3E                | 2.11E-06          | 2.11E-06             | 22.6644            | 22.6644                      | T up vs N                              | 51.857  | 91.2205   | 28.1454    | 1         |
| cg03238359                    | GPR44                   | 3.98E-06          | 3.98E-06             | 0.16159            | -6.1885                      | T down vs N                            | 46.766  | 31.1163   | 10.6458    | 1         |

| Probeset ID | UCSC_REFGENE_NAME                       | p-value<br>(Type) | p-value (T vs.<br>N) | Ratio (T<br>vs. N) | Fold-<br>Change (T<br>vs. N) | Fold-Change (T vs.<br>N) (Description) | F(Type) | SS (Type) | SS (Error) | F (Error) |
|-------------|-----------------------------------------|-------------------|----------------------|--------------------|------------------------------|----------------------------------------|---------|-----------|------------|-----------|
| cg03238581  | CSPG4                                   | 0.00017244        | 0.000172435          | 0.285222           | -3.50604                     | T down vs N                            | 23.656  | 14.7399   | 9.96945    | 1         |
| cg03240663  | SIGLEC14                                | 5.02E-05          | 5.02E-05             | 0.18707            | -5.3456                      | T down vs N                            | 30.046  | 26.3179   | 14.0146    | 1         |
| cg03242344  | ORAOV1                                  | 4.87E-05          | 4.87E-05             | 0.191604           | -5.21909                     | T down vs N                            | 30.217  | 25.5712   | 13.54      | 1         |
| cg03242458  | TRIM15                                  | 0.000203          | 0.000202997          | 0.331443           | -3.01711                     | T down vs N                            | 22.883  | 11.4218   | 7.98622    | 1         |
| cg03243450  | NDUFS6;MRPL36                           | 0.00618962        | 0.00618962           | 4.22088            | 4.22088                      | T up vs N                              | 9.9252  | 19.4228   | 31.3107    | 1         |
| cg03243551  | DAXX;DAXX;DAXX;DAXX                     | 0.0002739         | 0.0002739            | 0.292781           | -3.41552                     | T down vs N                            | 21.505  | 14.1316   | 10.5142    | 1         |
| cg03243768  | FLJ46111                                | 4.66E-05          | 4.66E-05             | 0.123915           | -8.07006                     | T down vs N                            | 30.473  | 40.8404   | 21.4436    | 1         |
| cg03243893  | MYOM2                                   | 0.00673988        | 0.00673988           | 0.209984           | -4.76227                     | T down vs N                            | 9.6709  | 22.8147   | 37.7456    | 1         |
| cg03245734  | ANGPT1;ANGPT1                           | 3.07E-05          | 3.07E-05             | 0.235267           | -4.25048                     | T down vs N                            | 32.901  | 19.6118   | 9.53736    | 1         |
| cg03246914  | TUBB1                                   | 0.00052514        | 0.000525139          | 0.279007           | -3.58414                     | T down vs N                            | 18.686  | 15.2621   | 13.068     | 1         |
| cg03247919  | KIR2DL4;KIR2DL4;KIR2DL4;KIR2DL4;KIR2DL4 | 3.10E-06          | 3.10E-06             | 0.24605            | -4.06422                     | T down vs N                            | 48.724  | 18.416    | 6.04747    | 1         |
|             | R2DL4;KIR2DL4                           |                   |                      |                    |                              |                                        |         |           |            |           |
| cg03248820  | KAZALD1                                 | 4.68E-05          | 4.68E-05             | 8.32459            | 8.32459                      | T up vs N                              | 30.451  | 42.0641   | 22.1018    | 1         |
| cg03249863  | CDK4;MARCH9                             | 0.00072342        | 0.000723419          | 0.326862           | -3.05939                     | T down vs N                            | 17.384  | 11.7115   | 10.7794    | 1         |
| cg03250947  | NOTCH4                                  | 0.00013723        | 0.000137225          | 0.280719           | -3.56228                     | T down vs N                            | 24.766  | 15.1162   | 9.76598    | 1         |
| cg03252313  | CNTNAP2                                 | 6.24E-06          | 6.24E-06             | 0.164077           | -6.0947                      | T down vs N                            | 43.407  | 30.5971   | 11.2782    | 1         |
| cg03254067  | CLNK                                    | 3.39E-05          | 3.39E-05             | 0.192285           | -5.20061                     | T down vs N                            | 32.309  | 25.4616   | 12.6091    | 1         |
| cg03254928  | CD3G;CD3D;CD3D                          | 2.53E-05          | 2.53E-05             | 0.198765           | -5.03106                     | T down vs N                            | 34.049  | 24.4482   | 11.4883    | 1         |
| cg03255182  | HOXC4;HOXC6;HOXC5;HOXC6                 | 0.00605331        | 0.00605331           | 3.45133            | 3.45133                      | T up vs N                              | 9.9922  | 14.3726   | 23.0142    | 1         |
| cg03256198  | GALNT2                                  | 0.00051676        | 0.000516757          | 0.264926           | -3.77463                     | T down vs N                            | 18.753  | 16.5256   | 14.0993    | 1         |
| cg03261155  | S100A7L2                                | 0.00318931        | 0.00318931           | 0.296893           | -3.36821                     | T down vs N                            | 12.008  | 13.8125   | 18.4046    | 1         |
| cg03261783  | CLYBL                                   | 0.00052664        | 0.000526635          | 0.206743           | -4.83692                     | T down vs N                            | 18.675  | 23.2717   | 19.9387    | 1         |
| cg03262105  | LRRIC16A                                | 0.00074792        | 0.000747916          | 8.45012            | 8.45012                      | T up vs N                              | 18.404  | 37.9203   | 28.8463    | 1         |
| cg03263226  | TMED4                                   | 0.00406716        | 0.00406716           | 0.322637           | -3.09946                     | T down vs N                            | 11.223  | 11.9857   | 17.0879    | 1         |
| cg03263337  | CLVS1                                   | 0.00014279        | 0.000142787          | 0.205923           | -4.85617                     | T down vs N                            | 24.57   | 23.3891   | 15.2309    | 1         |
| cg03267697  | GMPPA;GMPPA                             | 3.97E-06          | 3.97E-06             | 4.44276            | 4.44276                      | T up vs N                              | 46.797  | 20.8294   | 7.12166    | 1         |
| cg03271520  | OR1A2                                   | 4.49E-05          | 4.49E-05             | 0.1521             | -6.57464                     | T down vs N                            | 30.685  | 33.2172   | 17.3206    | 1         |
| cg03271650  | ACSL5;ACSL5;ACSL5                       | 6.07E-06          | 6.07E-06             | 0.298584           | -3.34914                     | T down vs N                            | 43.603  | 13.6836   | 5.02123    | 1         |
| cg03273615  | RBM41;RBM41                             | 0.00029859        | 0.000298591          | 0.331394           | -3.01756                     | T down vs N                            | 21.118  | 11.4249   | 8.65625    | 1         |
| cg03274368  | ORS5D18                                 | 3.94E-05          | 3.94E-05             | 0.171191           | -5.84143                     | T down vs N                            | 31.423  | 29.1769   | 14.8565    | 1         |
| cg03274456  | AHNAK                                   | 0.00109495        | 0.00109495           | 4.33993            | 4.33993                      | T up vs N                              | 15.776  | 20.1804   | 20.4674    | 1         |
| cg03274989  | ZNF321                                  | 0.00072001        | 0.000720012          | 5.76307            | 5.76307                      | T up vs N                              | 17.936  | 27.0419   | 22.6151    | 1         |
| cg03276468  | SNX29                                   | 0.00138085        | 0.00138085           | 0.291899           | -3.42584                     | T down vs N                            | 14.913  | 14.2011   | 15.2365    | 1         |
| cg03276883  | BDH2                                    | 1.73E-05          | 1.73E-05             | 0.129991           | -7.69281                     | T down vs N                            | 36.451  | 38.9892   | 17.1143    | 1         |
| cg03279206  | AVP                                     | 4.79E-05          | 4.79E-05             | 5.07111            | 5.07111                      | T up vs N                              | 30.321  | 24.6887   | 13.0281    | 1         |
| cg03283694  | SIGLEC11;SIGLEC11                       | 1.19E-05          | 1.19E-05             | 0.261937           | -3.81771                     | T down vs N                            | 38.898  | 16.8091   | 6.91417    | 1         |
| cg03283842  | FKBP7;FKBP7;PLEKHA3;MIR548N             | 0.00350502        | 0.00350502           | 7.23414            | 7.23414                      | T up vs N                              | 11.7    | 36.675    | 50.154     | 1         |
| cg03287469  | RAD18                                   | 0.00038668        | 0.00038668           | 0.103986           | -9.61666                     | T down vs N                            | 19.983  | 47.9868   | 38.4231    | 1         |
| cg03290418  | FAM108A1;FAM108A1                       | 2.01E-05          | 2.01E-05             | 0.327567           | -3.05281                     | T down vs N                            | 35.476  | 11.6665   | 5.26163    | 1         |
| cg03291755  | BNC2                                    | 1.44E-05          | 1.44E-05             | 0.101996           | -9.80432                     | T down vs N                            | 37.63   | 48.8097   | 20.7536    | 1         |
| cg03293507  | RNF39;RNF39                             | 0.00013126        | 0.000131257          | 4.08764            | 4.08764                      | T up vs N                              | 24.985  | 18.5673   | 11.89      | 1         |
| cg03293732  | IKZF3;IKZF3;IKZF3;IKZF3;IKZF3;IKZF3     | 0.00161539        | 0.00161539           | 0.22139            | -4.51692                     | T down vs N                            | 14.344  | 21.2945   | 23.7533    | 1         |
|             | TSPAN14;TSPAN14                         |                   |                      |                    |                              |                                        |         |           |            |           |
| cg03293884  | TSPAN14;TSPAN14                         | 0.00606205        | 0.00606205           | 0.304699           | -3.28193                     | T down vs N                            | 10.189  | 12.4503   | 18.329     | 1         |
| cg03294458  | WNNK4                                   | 8.13E-05          | 8.13E-05             | 3.79087            | 3.79087                      | T up vs N                              | 27.436  | 16.6325   | 9.69971    | 1         |
| cg03295852  | ASAP1IT1;ASAP1                          | 3.82E-05          | 3.82E-05             | 0.232881           | -4.29404                     | T down vs N                            | 31.612  | 19.8892   | 10.0665    | 1         |
| cg03295928  | RTKN                                    | 0.00010083        | 0.000100834          | 6.84626            | 6.84626                      | T up vs N                              | 26.314  | 34.6607   | 21.0749    | 1         |
| cg03296797  | CRISPLD2                                | 0.0011224         | 0.0011224            | 0.273094           | -3.66175                     | T down vs N                            | 15.682  | 15.7787   | 16.0984    | 1         |
| cg03298096  | GIF                                     | 0.00046676        | 0.000466755          | 0.289264           | -3.45705                     | T down vs N                            | 19.18   | 14.4111   | 12.0221    | 1         |
| cg03300099  | SMR3A                                   | 0.00193537        | 0.00193537           | 0.294824           | -3.39185                     | T down vs N                            | 13.703  | 13.9721   | 16.3146    | 1         |
| cg03300883  | C10orf2;C10orf2;C10orf2;C10orf2         | 3.46E-06          | 3.46E-06             | 0.182201           | -5.48844                     | T down vs N                            | 47.859  | 27.1525   | 9.07751    | 1         |
| cg03301582  | PON3                                    | 0.00102894        | 0.00102894           | 3.62204            | 3.62204                      | T up vs N                              | 16.011  | 15.5147   | 15.5037    | 1         |
| cg03302259  | ACP5;ACP5;ACP5;ACP5                     | 0.00060388        | 0.000603884          | 3.13589            | 3.13589                      | T up vs N                              | 18.112  | 12.2345   | 10.8082    | 1         |
| cg03304472  | FAM81B                                  | 0.00074638        | 0.00074638           | 0.195614           | -5.11212                     | T down vs N                            | 17.259  | 24.9343   | 23.115     | 1         |
| cg03305624  | MYO9B;MYO9B                             | 0.00251796        | 0.00251796           | 0.313926           | -3.18546                     | T down vs N                            | 12.796  | 12.5726   | 15.7209    | 1         |
| cg03305955  | HOXC4;HOXC5;HOXC6                       | 2.50E-07          | 2.50E-07             | 0.301697           | -3.31458                     | T down vs N                            | 72.268  | 13.4498   | 2.97776    | 1         |
| cg03306641  | TRIM6-                                  | 0.00019837        | 0.000198374          | 0.269963           | -3.70422                     | T down vs N                            | 22.991  | 16.0603   | 11.1767    | 1         |
|             | TRIM34;TRIM34;TRIM34;TRIM34             |                   |                      |                    |                              |                                        |         |           |            |           |
| cg03306956  | HBE1;HBE1                               | 5.11E-08          | 5.11E-08             | 0.160475           | -6.2315                      | T down vs N                            | 91.412  | 31.3532   | 5.48778    | 1         |
| cg03308399  | HOXA3;HOXA3;HOXA3                       | 3.33E-05          | 3.33E-05             | 3.35842            | 3.35842                      | T up vs N                              | 32.414  | 13.7463   | 6.78542    | 1         |
| cg03310087  | IGF1R                                   | 0.00012167        | 0.000121671          | 0.111488           | -8.96956                     | T down vs N                            | 25.363  | 45.0786   | 28.4374    | 1         |
| cg03310691  | PAR3                                    | 2.23E-05          | 2.23E-05             | 0.282514           | -3.53965                     | T down vs N                            | 34.827  | 14.9649   | 6.87505    | 1         |
| cg03311684  | EMX2OS                                  | 0.00034158        | 0.000341581          | 0.142066           | -7.039                       | T down vs N                            | 20.522  | 35.6684   | 27.8086    | 1         |
| cg03312856  | TAF1C;TAF1C                             | 0.00072046        | 0.000720461          | 0.203724           | -4.9086                      | T down vs N                            | 17.934  | 22.3135   | 18.6634    | 1         |
| cg03314029  | ZNF469                                  | 0.00045394        | 0.00045394           | 4.94262            | 4.94262                      | T up vs N                              | 19.297  | 23.9144   | 19.8284    | 1         |
| cg03315007  | C1orf86                                 | 0.00127305        | 0.00127305           | 15.2008            | 15.2008                      | T up vs N                              | 15.212  | 69.3634   | 72.956     | 1         |
| cg03316101  | ORS2M1                                  | 2.00E-05          | 2.00E-05             | 0.200943           | -4.97653                     | T down vs N                            | 35.519  | 24.1194   | 10.8648    | 1         |
| cg03317045  | KIAA0040;KIAA0040;KIAA0040;KIAA00       | 0.00043561        | 0.000435611          | 3.00993            | 3.00993                      | T up vs N                              | 19.472  | 11.3726   | 9.34485    | 1         |
|             | 40                                      |                   |                      |                    |                              |                                        |         |           |            |           |
| cg03318924  | C1QL4                                   | 0.00015087        | 0.000150872          | 3.00859            | 3.00859                      | T up vs N                              | 24.301  | 11.3634   | 7.48172    | 1         |
| cg03320492  | C1orf228                                | 7.86E-05          | 7.86E-05             | 0.287003           | -3.48428                     | T down vs N                            | 27.608  | 14.5939   | 8.45772    | 1         |
| cg03320607  | LILRA3                                  | 0.00226678        | 0.00226678           | 0.317017           | -3.1544                      | T down vs N                            | 13.154  | 12.3609   | 15.035     | 1         |

| Probeset ID | UCSC_REFGENE_NAME                                                                        | p-value<br>(Type) | p-value (T vs.<br>N) | Ratio (T<br>vs. N) | Fold-<br>Change (T<br>vs. N) | Fold-Change (T vs.<br>N) (Description) | F(Type) | SS (Type) | SS (Error) | F (Error) |
|-------------|------------------------------------------------------------------------------------------|-------------------|----------------------|--------------------|------------------------------|----------------------------------------|---------|-----------|------------|-----------|
| cg03328299  | STOML1                                                                                   | 0.00261345        | 0.00261345           | 0.315073           | -3.17386                     | T down vs N                            | 12.67   | 12.4936   | 15.7771    | 1         |
| cg03329755  | RPS6KA2                                                                                  | 0.00553179        | 0.00553179           | 0.253543           | -3.9441                      | T down vs N                            | 10.265  | 17.6364   | 27.4893    | 1         |
| cg03330485  | GFRA2;GFRA2;GFRA2                                                                        | 8.40E-06          | 8.40E-06             | 8.59386            | 8.59386                      | T up vs N                              | 41.282  | 43.3373   | 16.7964    | 1         |
| cg03330490  | HHEX                                                                                     | 0.00216407        | 0.00216407           | 0.233844           | -4.27636                     | T down vs N                            | 13.314  | 19.7767   | 23.7666    | 1         |
| cg03331474  | HOXA3                                                                                    | 3.09E-05          | 3.09E-05             | 11.8273            | 11.8273                      | T up vs N                              | 32.853  | 57.1608   | 27.838     | 1         |
| cg03331695  | RAB40A                                                                                   | 0.0046998         | 0.0046998            | 0.317858           | -3.14605                     | T down vs N                            | 10.768  | 12.3039   | 18.2829    | 1         |
| cg03332623  | ZNF184                                                                                   | 8.93E-08          | 8.93E-08             | 0.184376           | -5.4237                      | T down vs N                            | 84.251  | 26.7753   | 5.08486    | 1         |
| cg03335624  | ENC1                                                                                     | 4.78E-05          | 4.78E-05             | 0.212457           | -4.70683                     | T down vs N                            | 30.321  | 22.4736   | 11.859     | 1         |
| cg03336167  | SLC22A18;SLC22A18                                                                        | 0.00011114        | 0.000111137          | 5.78739            | 5.78739                      | T up vs N                              | 25.819  | 28.8704   | 17.8911    | 1         |
| cg03336334  | APBA2;APBA2                                                                              | 0.00738689        | 0.00738689           | 3.43776            | 3.43776                      | T up vs N                              | 9.4006  | 14.2813   | 24.3072    | 1         |
| cg03337084  | LY6G5C                                                                                   | 4.48E-06          | 4.48E-06             | 0.302089           | -3.31028                     | T down vs N                            | 45.868  | 13.4207   | 4.68152    | 1         |
| cg03337918  | PLEKHF2                                                                                  | 0.00053929        | 0.00053929           | 0.284546           | -3.51437                     | T down vs N                            | 18.576  | 14.7957   | 12.7438    | 1         |
| cg03341233  | IDUA                                                                                     | 0.00091419        | 0.000914189          | 0.320598           | -3.11917                     | T down vs N                            | 16.465  | 12.1203   | 11.778     | 1         |
| cg03341413  | LBXCOR1                                                                                  | 0.00268821        | 0.00268821           | 3.5367             | 3.5367                       | T up vs N                              | 12.575  | 14.9452   | 19.0153    | 1         |
| cg03343571  | RNF39;RNF39                                                                              | 0.00015678        | 0.000156777          | 6.51119            | 6.51119                      | T up vs N                              | 24.115  | 32.876    | 21.8132    | 1         |
| cg03343942  | SLC39A5;SLC39A5                                                                          | 2.71E-07          | 2.71E-07             | 0.23252            | -3.09357                     | T down vs N                            | 71.411  | 11.9454   | 2.67642    | 1         |
| cg03344051  | HLA-DQB1                                                                                 | 0.00229862        | 0.00229862           | 0.326908           | -3.05897                     | T down vs N                            | 13.106  | 11.7086   | 14.2936    | 1         |
| cg03345116  | ZBTB16;ZBTB16                                                                            | 3.08E-05          | 3.08E-05             | 4.38935            | 4.38935                      | T up vs N                              | 32.865  | 20.4929   | 9.97682    | 1         |
| cg03347553  | GRK7                                                                                     | 4.85E-05          | 4.85E-05             | 0.247974           | -4.03268                     | T down vs N                            | 30.241  | 18.2119   | 9.63576    | 1         |
| cg03348161  | MS4A3;MS4A3;MS4A3                                                                        | 5.56E-06          | 5.56E-06             | 0.231716           | -4.31562                     | T down vs N                            | 44.245  | 20.0262   | 7.24189    | 1         |
| cg03349134  | SCGN                                                                                     | 0.00023798        | 0.000237983          | 0.259634           | -3.85157                     | T down vs N                            | 22.145  | 17.0314   | 12.3054    | 1         |
| cg03350299  | APOB                                                                                     | 5.30E-05          | 5.30E-05             | 5.89828            | 5.89828                      | T up vs N                              | 29.75   | 29.498    | 15.8643    | 1         |
| cg03350900  | SOBP                                                                                     | 4.15E-06          | 4.15E-06             | 8.42238            | 8.42238                      | T up vs N                              | 46.455  | 42.5289   | 14.6479    | 1         |
| cg03352106  | KCNJ8                                                                                    | 3.77E-06          | 3.77E-06             | 11.3056            | 11.3056                      | T up vs N                              | 47.201  | 55.0924   | 18.6749    | 1         |
| cg03353804  | HEATR2                                                                                   | 0.00054207        | 0.000542069          | 0.325583           | -3.07142                     | T down vs N                            | 18.555  | 11.7938   | 10.1699    | 1         |
| cg03354414  | GP6;GP6                                                                                  | 0.00402842        | 0.00402842           | 0.248682           | -4.02119                     | T down vs N                            | 11.253  | 18.1375   | 25.7886    | 1         |
| cg03354616  | BCKDHB;BCKDHB                                                                            | 0.00079471        | 0.000794713          | 0.242888           | -4.11713                     | T down vs N                            | 17.011  | 18.7573   | 17.6422    | 1         |
| cg03354810  | SYT10                                                                                    | 3.03E-05          | 3.03E-05             | 0.201552           | -4.9615                      | T down vs N                            | 32.977  | 24.0286   | 11.6585    | 1         |
| cg03355213  | CHMP4B                                                                                   | 0.00180694        | 0.00180694           | 0.308865           | -3.23766                     | T down vs N                            | 13.944  | 12.9279   | 14.8336    | 1         |
| cg03356689  | FLI1;FLI1                                                                                | 5.23E-05          | 5.23E-05             | 0.285087           | -3.50771                     | T down vs N                            | 29.823  | 14.7511   | 7.91385    | 1         |
| cg03357664  | TMEM200B                                                                                 | 1.43E-05          | 1.43E-05             | 0.210289           | -4.75536                     | T down vs N                            | 37.648  | 22.7722   | 9.67805    | 1         |
| cg03359430  | ZDHHC6                                                                                   | 1.31E-05          | 1.31E-05             | 0.124126           | -8.05634                     | T down vs N                            | 38.251  | 40.7738   | 17.0554    | 1         |
| cg03359503  | CLIC2;CLIC2                                                                              | 0.00020212        | 0.000202117          | 0.327512           | -3.05332                     | T down vs N                            | 22.903  | 11.6699   | 8.15247    | 1         |
| cg03361789  | EVPL                                                                                     | 0.00043271        | 0.000432707          | 0.250267           | -3.99573                     | T down vs N                            | 19.5    | 17.9723   | 14.7462    | 1         |
| cg03364683  | DDX60L                                                                                   | 0.00018672        | 0.000186721          | 0.188247           | -5.31216                     | T down vs N                            | 23.277  | 26.1212   | 17.9551    | 1         |
| cg03368099  | HOXA5                                                                                    | 0.00184384        | 0.00184384           | 6.89246            | 6.89246                      | T up vs N                              | 14.232  | 32.8503   | 34.6225    | 1         |
| cg03369965  | LRRC34                                                                                   | 0.00015777        | 0.000157768          | 0.278478           | -3.59095                     | T down vs N                            | 24.084  | 15.3075   | 10.1694    | 1         |
| cg03371275  | MAML2                                                                                    | 5.47E-05          | 5.47E-05             | 0.252715           | -3.95703                     | T down vs N                            | 29.569  | 17.7206   | 9.58862    | 1         |
| cg03371613  | C1QL1                                                                                    | 2.52E-06          | 2.52E-06             | 0.292774           | -3.41561                     | T down vs N                            | 50.402  | 14.1322   | 4.48627    | 1         |
| cg03375002  | LAT2;LAT2;LAT2                                                                           | 2.63E-09          | 2.63E-09             | 0.235247           | -4.25084                     | T down vs N                            | 139.21  | 19.6141   | 2.25436    | 1         |
| cg03375833  | TTL3                                                                                     | 0.0009441         | 0.000944101          | 0.322367           | -3.10205                     | T down vs N                            | 16.341  | 12.0034   | 11.7531    | 1         |
| cg03376712  | INTU;INTU                                                                                | 0.0002827         | 0.000282703          | 0.249515           | -4.00777                     | T down vs N                            | 21.362  | 18.0504   | 13.5194    | 1         |
| cg03380198  | IGF1R                                                                                    | 0.00043667        | 0.000436673          | 0.293639           | -3.40554                     | T down vs N                            | 19.462  | 14.0644   | 11.5628    | 1         |
| cg03380645  | SFTPB;SFTPB                                                                              | 4.55E-06          | 4.55E-06             | 0.217225           | -4.60353                     | T down vs N                            | 45.754  | 21.8343   | 7.63532    | 1         |
| cg03382250  | KIRREL3;KIRREL3                                                                          | 9.20E-05          | 9.20E-05             | 0.284495           | -3.515                       | T down vs N                            | 26.787  | 14.7999   | 8.84002    | 1         |
| cg03384318  | TCF7L2;TCF7L2;TCF7L2;TCF7L2                                                              | 6.71E-06          | 6.71E-06             | 0.117728           | -8.49413                     | T down vs N                            | 42.878  | 42.8682   | 15.9963    | 1         |
| cg03385530  | LOC440335;LOC440335                                                                      | 0.00105542        | 0.00105542           | 0.253268           | -3.94838                     | T down vs N                            | 15.915  | 17.6643   | 17.7588    | 1         |
| cg03388266  | TRPM8                                                                                    | 2.62E-05          | 2.62E-05             | 0.224071           | -4.46287                     | T down vs N                            | 33.853  | 20.9558   | 9.90452    | 1         |
| cg03391568  | PTH1R                                                                                    | 7.20E-06          | 7.20E-06             | 0.323111           | -3.09491                     | T down vs N                            | 42.373  | 11.9545   | 4.51399    | 1         |
| cg03392100  | C6orf26                                                                                  | 0.00041678        | 0.000416778          | 0.228114           | -4.38377                     | T down vs N                            | 19.66   | 20.4577   | 16.6489    | 1         |
| cg03393602  | ABHD3                                                                                    | 1.79E-05          | 1.79E-05             | 0.209296           | -4.77792                     | T down vs N                            | 36.232  | 22.9107   | 10.1172    | 1         |
| cg03397609  | PFDN6;WDR46;WDR46                                                                        | 3.35E-05          | 3.35E-05             | 0.26594            | -3.76025                     | T down vs N                            | 32.37   | 16.4307   | 8.12157    | 1         |
| cg03400060  | BHMT2;DMGDH                                                                              | 2.10E-07          | 2.10E-07             | 4.13541            | 4.13541                      | T up vs N                              | 74.194  | 18.8749   | 4.07043    | 1         |
| cg03400785  | PCDHGA4;PCDHGA6;PCDHGA9;PCDHGA10;PCDHGA8;PCDHGA5;PCDHGB1;PCDHGA10;PCDHGB4;PCDHGA3;PCDHGA | 0.00012054        | 0.000120541          | 3.10662            | 3.10662                      | T up vs N                              | 25.41   | 12.0346   | 7.57797    | 1         |
| cg03401312  | PDE4C;PDE4C                                                                              | 2.64E-06          | 2.64E-06             | 0.186916           | -5.35                        | T down vs N                            | 50.031  | 26.3437   | 8.42481    | 1         |
| cg03403640  | TCERG1L                                                                                  | 1.23E-05          | 1.23E-05             | 0.121496           | -8.2307                      | T down vs N                            | 38.693  | 41.615    | 17.2083    | 1         |
| cg03404566  | ALOX12                                                                                   | 2.54E-06          | 2.54E-06             | 3.91973            | 3.91973                      | T up vs N                              | 50.339  | 17.4774   | 5.5551     | 1         |
| cg03405789  | CRH                                                                                      | 0.00351867        | 0.00351867           | 0.1528             | -6.54452                     | T down vs N                            | 11.687  | 33.0555   | 45.2529    | 1         |
| cg03406718  | IL1F8                                                                                    | 2.98E-05          | 2.98E-05             | 0.276462           | -3.61713                     | T down vs N                            | 33.074  | 15.4821   | 7.48957    | 1         |
| cg03407140  | NXP1                                                                                     | 6.94E-06          | 6.94E-06             | 7.36418            | 7.36418                      | T up vs N                              | 42.637  | 37.3384   | 14.0115    | 1         |
| cg03407747  | ALOX12                                                                                   | 7.78E-05          | 7.78E-05             | 4.88999            | 4.88999                      | T up vs N                              | 27.666  | 23.595    | 13.6456    | 1         |
| cg03408619  | RBPMS;RBPMS;RBPMS;RBPMS                                                                  | 0.00278093        | 0.00278093           | 3.04183            | 3.04183                      | T up vs N                              | 12.462  | 11.5912   | 14.8824    | 1         |
| cg03414764  | KIAA1199                                                                                 | 0.00566665        | 0.00566665           | 0.329576           | -3.0342                      | T down vs N                            | 10.192  | 11.539    | 18.1148    | 1         |
| cg03415545  | ADH1C                                                                                    | 0.000515          | 0.000515002          | 0.283066           | -3.53274                     | T down vs N                            | 18.768  | 14.9187   | 12.7188    | 1         |
| cg03417156  | PODNL1;PODNL1;PODNL1                                                                     | 0.00034625        | 0.00034625           | 0.245917           | -4.06641                     | T down vs N                            | 20.463  | 18.4302   | 14.4107    | 1         |
| cg03423149  | MACROD1                                                                                  | 0.00110844        | 0.00110844           | 12.0784            | 12.0784                      | T up vs N                              | 15.729  | 58.1374   | 59.1375    | 1         |
| cg03423957  | RNF185;RNF185;RNF185;RNF185;RNF185;RNF185                                                | 2.67E-05          | 2.67E-05             | 0.196807           | -5.08113                     | T down vs N                            | 33.732  | 24.7488   | 11.7389    | 1         |

| Probeset ID | UCSC_REFGENE_NAME                 | p-value<br>(Type) | p-value (T vs.<br>N) | Ratio (T<br>vs. N) | Fold-<br>Change (T<br>vs. N) | Fold-Change (T vs.<br>N) (Description) | F(Type) | SS (Type) | SS (Error) | F (Error) |
|-------------|-----------------------------------|-------------------|----------------------|--------------------|------------------------------|----------------------------------------|---------|-----------|------------|-----------|
| cg03426762  | WDR46;WDR46                       | 0.00557308        | 0.00557308           | 0.269885           | -3.70528                     | T down vs N                            | 10.243  | 16.0674   | 25.099     | 1         |
| cg03427849  | WDD44;C4orf41;C4orf41             | 8.99E-05          | 8.99E-05             | 0.161887           | -6.17716                     | T down vs N                            | 26.907  | 31.0538   | 18.4661    | 1         |
| cg03428036  | WDR60                             | 0.00080811        | 0.000808106          | 0.23428            | -4.2684                      | T down vs N                            | 16.946  | 19.726    | 18.6253    | 1         |
| cg03430116  | KIAA0513                          | 0.002449          | 0.002449             | 0.273738           | -3.65313                     | T down vs N                            | 12.89   | 15.7214   | 19.5145    | 1         |
| cg03431705  | FAM96A;FAM96A                     | 0.00079544        | 0.000795438          | 5.80587            | 5.80587                      | T up vs N                              | 27.325  | 15.4535   | 4.52434    | 1         |
| cg03432176  | C2032                             | 0.0001182         | 0.000118197          | 0.292279           | -3.42139                     | T down vs N                            | 25.508  | 14.1712   | 8.88886    | 1         |
| cg03432955  | HLA-G                             | 3.60E-05          | 3.60E-05             | 5.02605            | 5.02605                      | T up vs N                              | 31.95   | 24.418    | 12.2282    | 1         |
| cg03433699  | RNASEK;C17orf49;C17orf49;C17orf49 | 5.34E-05          | 5.34E-05             | 0.318974           | -3.13505                     | T down vs N                            | 29.707  | 12.2288   | 6.58629    | 1         |
| cg03436967  | MIR54814;CNTNAP2                  | 0.00048159        | 0.000481594          | 0.195975           | -5.10269                     | T down vs N                            | 19.048  | 24.8779   | 20.8972    | 1         |
| cg03438552  | TAP2;TAP2                         | 5.98E-05          | 5.98E-05             | 0.181769           | -5.50149                     | T down vs N                            | 30.372  | 25.6266   | 12.6564    | 1         |
| cg03440799  | C1orf125;C1orf125                 | 7.65E-05          | 7.65E-05             | 0.237999           | -4.2017                      | T down vs N                            | 27.754  | 19.3002   | 11.1263    | 1         |
| cg03441710  | THSD4                             | 5.96E-08          | 5.96E-08             | 0.144001           | -6.94442                     | T down vs N                            | 89.391  | 35.1756   | 6.29603    | 1         |
| cg03446876  | MIR96                             | 0.0007708         | 0.000770802          | 0.321412           | -3.11127                     | T down vs N                            | 17.132  | 12.0664   | 11.2692    | 1         |
| cg03448840  | ARMC9                             | 0.00038987        | 0.000389865          | 0.26529            | -3.76946                     | T down vs N                            | 19.947  | 16.4914   | 13.2282    | 1         |
| cg03449040  | WWC3                              | 2.88E-06          | 2.88E-06             | 0.175155           | -5.70924                     | T down vs N                            | 49.329  | 28.425    | 9.21981    | 1         |
| cg03449125  | CAPN5                             | 3.17E-07          | 3.17E-07             | 0.246751           | -4.05267                     | T down vs N                            | 69.727  | 18.3413   | 4.20872    | 1         |
| cg03449150  | SPRR2F                            | 8.36E-07          | 8.36E-07             | 0.15841            | -6.31273                     | T down vs N                            | 60.05   | 31.7987   | 8.47254    | 1         |
| cg03449456  | PRDM16;PRDM16                     | 6.03E-05          | 6.03E-05             | 0.14827            | -6.74447                     | T down vs N                            | 29.035  | 34.123    | 18.8037    | 1         |
| cg03451779  | LRP11                             | 0.00018344        | 0.000183442          | 0.329135           | -3.03826                     | T down vs N                            | 23.361  | 11.5668   | 7.92212    | 1         |
| cg03452174  | RAB34;RAB34                       | 0.00128934        | 0.00128934           | 8.24049            | 8.24049                      | T up vs N                              | 15.165  | 41.6619   | 43.9557    | 1         |
| cg03452625  | ATG7;ATG7;ATG7                    | 0.00016046        | 0.000160456          | 0.3161             | -3.16355                     | T down vs N                            | 24.002  | 12.4233   | 8.28139    | 1         |
| cg03453744  | HOXB3                             | 1.34E-06          | 1.34E-06             | 9.24545            | 9.24545                      | T up vs N                              | 55.734  | 46.3322   | 13.3009    | 1         |
| cg03454235  | LRRMC43;IL31                      | 5.52E-05          | 5.52E-05             | 0.262328           | -3.81202                     | T down vs N                            | 29.52   | 16.7717   | 9.09045    | 1         |
| cg03454775  | MYOM2                             | 0.00173085        | 0.00173085           | 3.24113            | 3.24113                      | T up vs N                              | 14.097  | 12.9515   | 14.6998    | 1         |
| cg03458012  | DOCK5                             | 0.00021753        | 0.00021753           | 0.245649           | -4.07084                     | T down vs N                            | 22.56   | 18.4588   | 13.0912    | 1         |
| cg03458170  | ZNF311                            | 2.60E-07          | 2.60E-07             | 0.294747           | -3.39274                     | T down vs N                            | 71.848  | 13.9781   | 3.11282    | 1         |
| cg03462699  | GAL3ST2                           | 0.00200194        | 0.00200194           | 16.1781            | 16.1781                      | T up vs N                              | 13.584  | 72.5761   | 85.4821    | 1         |
| cg03462901  | RGMA;RGMA;RGMA;RGMA;RGMA;RG       | 1.84E-06          | 1.84E-06             | 0.190227           | -5.25687                     | T down vs N                            | 53.034  | 25.795    | 7.78217    | 1         |
| cg03465028  | KLF13                             | 0.00030891        | 0.000308911          | 7.76523            | 7.76523                      | T up vs N                              | 20.966  | 39.3481   | 30.0278    | 1         |
| cg03466124  | GNB4                              | 8.81E-06          | 8.81E-06             | 0.230645           | -4.33568                     | T down vs N                            | 40.944  | 20.1534   | 7.87547    | 1         |
| cg03468382  | KIF11                             | 0.00153938        |                      |                    |                              |                                        |         |           |            |           |

| Probeset ID | UCSC_REFGENE_NAME                         | p-value<br>(Type) | p-value (T vs.<br>N) | Ratio (T<br>vs. N) | Fold-<br>Change (T<br>vs. N) | Fold-Change (T vs.<br>N) (Description) | F(Type) | SS (Type) | SS (Error) | F (Error) |
|-------------|-------------------------------------------|-------------------|----------------------|--------------------|------------------------------|----------------------------------------|---------|-----------|------------|-----------|
| cg03521696  | HLA-G                                     | 9.12E-05          | 9.12E-05             | 12.2098            | 12.2098                      | T up vs N                              | 26.833  | 58.6433   | 34.9677    | 1         |
| cg03523104  | ZBTB39                                    | 6.73E-06          | 6.73E-06             | 0.232593           | -4.29936                     | T down vs N                            | 42.851  | 19.923    | 7.43896    | 1         |
| cg03526702  | ELANE                                     | 6.56E-06          | 6.56E-06             | 0.24597            | -4.06554                     | T down vs N                            | 43.043  | 18.4245   | 6.84873    | 1         |
| cg03528325  | CD1A                                      | 1.49E-05          | 1.49E-05             | 0.145985           | -6.85                        | T down vs N                            | 37.421  | 34.6804   | 14.8281    | 1         |
| cg03528538  | MUC6                                      | 7.11E-05          | 7.11E-05             | 0.315424           | -3.17033                     | T down vs N                            | 28.145  | 12.4695   | 7.08881    | 1         |
| cg03528824  | PKNOX2                                    | 5.37E-05          | 5.37E-05             | 0.307318           | -3.25396                     | T down vs N                            | 29.678  | 13.0386   | 7.0295     | 1         |
| cg03529662  | OR1A1                                     | 0.00026626        | 0.000266259          | 0.329028           | -3.03925                     | T down vs N                            | 21.633  | 11.5736   | 8.56003    | 1         |
| cg03530983  | HLA-DOB                                   | 5.99E-06          | 5.99E-06             | 0.202968           | -4.92687                     | T down vs N                            | 43.702  | 23.8189   | 8.72048    | 1         |
| cg03532879  | ADIG                                      | 9.92E-05          | 9.92E-05             | 0.261919           | -3.81797                     | T down vs N                            | 26.4    | 16.8108   | 10.1883    | 1         |
| cg03533256  | CD300E                                    | 9.72E-05          | 9.72E-05             | 0.164259           | -6.08795                     | T down vs N                            | 26.501  | 30.5596   | 18.4504    | 1         |
| cg03533858  | MORN1;RER1                                | 0.00035042        | 0.000350419          | 0.207415           | -4.82126                     | T down vs N                            | 20.41   | 23.176    | 18.168     | 1         |
| cg03536404  | ITSN2;ITSN2;ITSN2                         | 4.43E-05          | 4.43E-05             | 0.331771           | -3.01413                     | T down vs N                            | 30.76   | 11.4014   | 5.93057    | 1         |
| cg03536885  | HOXA3                                     | 0.00060604        | 0.000606041          | 5.44445            | 5.44445                      | T up vs N                              | 18.097  | 26.8964   | 23.7798    | 1         |
| cg03539051  | NLRP13                                    | 9.32E-05          | 9.32E-05             | 0.215817           | -4.63355                     | T down vs N                            | 26.72   | 22.0206   | 13.1859    | 1         |
| cg03541338  | RGS10                                     | 7.02E-05          | 7.02E-05             | 11.1134            | 11.1134                      | T up vs N                              | 28.215  | 54.3161   | 30.8012    | 1         |
| cg03543081  | CRP                                       | 2.39E-05          | 2.39E-05             | 0.196667           | -5.08473                     | T down vs N                            | 34.407  | 24.7703   | 11.5186    | 1         |
| cg03543593  | TNXB                                      | 2.77E-07          | 2.77E-07             | 0.235965           | -4.23792                     | T down vs N                            | 71.145  | 19.5317   | 4.39253    | 1         |
| cg03545757  | UBE2I;UBE2I;UBE2I;UBE2I                   | 3.78E-05          | 3.78E-05             | 0.245595           | -4.07174                     | T down vs N                            | 31.667  | 18.4646   | 9.32942    | 1         |
| cg03546163  | FKBP5;FKBP5;FKBP5;FKBP5                   | 1.09E-07          | 1.09E-07             | 0.202183           | -4.94602                     | T down vs N                            | 81.815  | 23.9349   | 4.68078    | 1         |
| cg03547958  | KLK1                                      | 2.44E-06          | 2.44E-06             | 0.12998            | -7.6935                      | T down vs N                            | 50.659  | 38.9926   | 12.3153    | 1         |
| cg03553786  | LOC285375                                 | 0.00615225        | 0.00615225           | 6.72991            | 6.72991                      | T up vs N                              | 9.9434  | 34.0458   | 54.7833    | 1         |
| cg03557857  | KCNIP2;KCNIP2;KCNIP2;KCNIP2;KCNIP2;KCNIP2 | 0.00054267        | 0.00054267           | 3.23068            | 3.23068                      | T up vs N                              | 18.55   | 12.8804   | 11.1096    | 1         |
| cg03558769  | BOK                                       | 8.76E-07          | 8.76E-07             | 0.231484           | -4.31996                     | T down vs N                            | 59.62   | 20.0538   | 5.38179    | 1         |
| cg03563169  | TBX18                                     | 4.17E-06          | 4.17E-06             | 0.165205           | -6.05307                     | T down vs N                            | 46.413  | 30.3655   | 10.468     | 1         |
| cg03564727  | KCNA7                                     | 2.09E-05          | 2.09E-05             | 0.100487           | -9.95157                     | T down vs N                            | 35.253  | 49.4493   | 22.443     | 1         |
| cg03574115  | WDR65;WDR65;EBNA1BP2;EBNA1BP2             | 1.90E-06          | 1.90E-06             | 0.243722           | -4.10303                     | T down vs N                            | 52.729  | 18.6665   | 5.6641     | 1         |
| cg03575041  | LILRA4                                    | 2.10E-07          | 2.10E-07             | 0.24143            | -4.14198                     | T down vs N                            | 74.19   | 18.9172   | 4.07971    | 1         |
| cg03576419  | FRZB                                      | 0.000493          | 0.000492995          | 5.67736            | 5.67736                      | T up vs N                              | 18.95   | 28.2426   | 23.8463    | 1         |
| cg03576469  | CCDC8                                     | 0.00098007        | 0.00098007           | 5.96407            | 5.96407                      | T up vs N                              | 16.197  | 29.8679   | 29.5042    | 1         |
| cg03582327  | SIGLEC10;SIGLEC10;SIGLEC10;SIGLEC10       | 0.00056817        | 0.000568165          | 0.270422           | -3.69793                     | T down vs N                            | 18.361  | 16.0187   | 13.9588    | 1         |
| cg03582736  | TMEM56                                    | 3.37E-05          | 3.37E-05             | 0.31699            | -3.15467                     | T down vs N                            | 32.344  | 12.3627   | 6.11572    | 1         |
| cg03583016  | FLJ32063                                  | 0.00047277        | 0.000472768          | 0.221385           | -4.51702                     | T down vs N                            | 19.126  | 21.2951   | 17.815     | 1         |
| cg03583111  | DES                                       | 3.33E-05          | 3.33E-05             | 7.85593            | 7.85593                      | T up vs N                              | 32.406  | 39.7952   | 19.6483    | 1         |
| cg03585389  | DIP2C                                     | 0.00049009        | 0.000490087          | 3.7138             | 3.7138                       | T up vs N                              | 18.975  | 16.1237   | 13.5961    | 1         |
| cg03589296  | MEIS1                                     | 0.00080489        | 0.000804893          | 0.267633           | -3.73645                     | T down vs N                            | 16.961  | 16.2736   | 15.3513    | 1         |
| cg03591606  | DLGAP2                                    | 0.0012461         | 0.0012461            | 9.79534            | 9.79534                      | T up vs N                              | 15.291  | 48.7705   | 51.0304    | 1         |
| cg03592903  | ADAMTS12                                  | 6.02E-05          | 6.02E-05             | 0.267537           | -3.73781                     | T down vs N                            | 29.042  | 16.2825   | 8.97032    | 1         |
| cg03594078  | PIWIL2;PIWIL2                             | 0.00011591        | 0.00011591           | 0.196499           | -5.08909                     | T down vs N                            | 25.607  | 24.7964   | 15.4939    | 1         |
| cg03594550  | SOX11;SOX11                               | 0.00025483        | 0.00025483           | 0.277944           | -3.59785                     | T down vs N                            | 21.832  | 15.3536   | 11.2521    | 1         |
| cg03595881  | EBF2                                      | 2.70E-08          | 2.70E-08             | 0.309599           | -3.22999                     | T down vs N                            | 100.23  | 12.8757   | 2.05535    | 1         |
| cg03596034  | RNF135;RNF135                             | 0.00285779        | 0.00285779           | 8.44256            | 8.44256                      | T up vs N                              | 12.371  | 42.6245   | 55.1296    | 1         |
| cg03598754  | SARM1                                     | 0.00280978        | 0.00280978           | 3.38723            | 3.38723                      | T up vs N                              | 12.427  | 13.9408   | 17.9488    | 1         |
| cg03599147  | ODZ4                                      | 0.00136895        | 0.00136895           | 0.330974           | -3.02138                     | T down vs N                            | 15.354  | 10.7775   | 10.5292    | 1         |
| cg03599197  | MIR187                                    | 0.00015117        | 0.000151166          | 0.243414           | -4.10822                     | T down vs N                            | 24.292  | 18.6999   | 12.317     | 1         |
| cg03599257  | SMPDL3B                                   | 7.81E-06          | 7.81E-06             | 0.315286           | -3.17172                     | T down vs N                            | 41.794  | 12.479    | 4.77733    | 1         |
| cg03599590  | SLC35A5                                   | 7.00E-05          | 7.00E-05             | 0.24309            | -4.1137                      | T down vs N                            | 28.226  | 18.7352   | 10.6201    | 1         |
| cg03599891  | GPATCH8                                   | 0.00518417        | 0.00518417           | 0.289498           | -3.45426                     | T down vs N                            | 10.464  | 14.3923   | 22.0067    | 1         |
| cg03601797  | KCNJ3                                     | 0.00203618        | 0.00203618           | 3.71974            | 3.71974                      | T up vs N                              | 13.525  | 16.163    | 19.1204    | 1         |
| cg03601952  | MPV17L;MPV17L                             | 0.00025154        | 0.000251544          | 7.77175            | 7.77175                      | T up vs N                              | 21.891  | 39.3803   | 28.7825    | 1         |
| cg03602143  | NLRP11;NLRP4;NLRP11                       | 0.00011457        | 0.00011457           | 0.246719           | -4.05319                     | T down vs N                            | 25.665  | 18.3447   | 11.4364    | 1         |
| cg03602500  | KIR3DX1                                   | 8.43E-05          | 8.43E-05             | 0.177535           | -5.63269                     | T down vs N                            | 27.244  | 27.9862   | 16.4357    | 1         |
| cg03604011  | AHRR                                      | 0.00075705        | 0.000757048          | 0.121425           | -8.23557                     | T down vs N                            | 17.203  | 41.6383   | 38.7266    | 1         |
| cg03604763  | WDR63                                     | 4.05E-05          | 4.05E-05             | 0.28441            | -3.51605                     | T down vs N                            | 31.274  | 14.807    | 7.57525    | 1         |
| cg03605284  | LIMCH1;LIMCH1;LIMCH1;LIMCH1;LIMCH1        | 0.00015637        | 0.000156369          | 0.292586           | -3.4178                      | T down vs N                            | 24.127  | 14.147    | 9.38159    | 1         |
| cg03605692  | CH1                                       | 0.00092065        | 0.000920654          | 0.247864           | -4.03447                     | T down vs N                            | 16.438  | 18.2235   | 17.7382    | 1         |
| cg03607573  | WFDC3                                     | 3.37E-05          | 3.37E-05             | 0.312925           | -3.19565                     | T down vs N                            | 32.334  | 12.6421   | 6.25578    | 1         |
| cg03607708  | TAF1D                                     | 0.00010167        | 0.00010167           | 0.203035           | -4.92527                     | T down vs N                            | 26.272  | 23.8092   | 14.5001    | 1         |
| cg03612692  | USH2A                                     | 0.00040859        | 0.000408592          | 0.328999           | -3.03953                     | T down vs N                            | 20.41   | 10.8946   | 8.00675    | 1         |
| cg03612990  | PADI3                                     | 7.97E-06          | 7.97E-06             | 0.176864           | -5.65407                     | T down vs N                            | 41.65   | 28.109    | 10.7982    | 1         |
| cg03612990  | ACSM4                                     | 7.97E-06          | 7.97E-06             | 0.176864           | -5.65407                     | T down vs N                            | 41.65   | 28.109    | 10.7982    | 1         |
| cg03613353  | XAB2;LOC100131801;LOC100131801            | 0.00199185        | 0.00199185           | 0.239759           | -4.17085                     | T down vs N                            | 13.602  | 19.1025   | 22.4703    | 1         |
| cg03613433  | DLGAP2                                    | 0.00047106        | 0.000471063          | 0.234291           | -4.2682                      | T down vs N                            | 19.141  | 19.7248   | 16.4882    | 1         |
| cg03613525  | CCDC68;CCDC68                             | 3.76E-06          | 3.76E-06             | 0.168427           | -5.93729                     | T down vs N                            | 47.216  | 29.7176   | 10.0704    | 1         |
| cg03615235  | BLCAP;BLCAP;BLCAP;BLCAP;NNAT;NNAT         | 0.00024539        | 0.000245387          | 5.93192            | 5.93192                      | T up vs N                              | 22.005  | 29.6874   | 21.5864    | 1         |
| cg03618016  | AT;BLCAP                                  | 0.0002483         | 0.000248297          | 0.137962           | -7.24837                     | T down vs N                            | 21.951  | 36.7479   | 26.7859    | 1         |
| cg03619586  | OR2G3                                     | 4.90E-07          | 4.90E-07             | 0.309705           | -3.22888                     | T down vs N                            | 65.24   | 12.8682   | 3.15588    | 1         |
| cg03619586  | CLIC1                                     | 4.90E-07          | 4.90E-07             | 0.309705           | -3.22888                     | T down vs N                            | 65.24   | 12.8682   | 3.15588    | 1         |

| Probeset ID | UCSC_REFGENE_NAME                                               | p-value<br>(Type) | p-value (T vs.<br>N) | Ratio (T<br>vs. N) | Fold-<br>Change (T<br>vs. N) | Fold-Change (T vs.<br>N) (Description) | F(Type) | SS (Type) | SS (Error) | F (Error) |
|-------------|-----------------------------------------------------------------|-------------------|----------------------|--------------------|------------------------------|----------------------------------------|---------|-----------|------------|-----------|
| cg03621001  | RAB8A                                                           | 8.91E-06          | 8.91E-06             | 4.16471            | 4.16471                      | T up vs N                              | 40.866  | 19.0631   | 7.46364    | 1         |
| cg03621841  | ZNF423                                                          | 5.54E-06          | 5.54E-06             | 0.219791           | -4.54978                     | T down vs N                            | 44.271  | 21.4997   | 7.77026    | 1         |
| cg03621974  | CD163;CD163                                                     | 6.93E-07          | 6.93E-07             | 0.078361           | -12.7614                     | T down vs N                            | 61.833  | 60.7329   | 15.7154    | 1         |
| cg03625177  | TGFB1                                                           | 0.00483499        | 0.00483499           | 7.83471            | 7.83471                      | T up vs N                              | 10.679  | 39.6908   | 59.4652    | 1         |
| cg03626208  | CACNA1C;CACNA1C;CACNA1C;CACNA1C;CACNA1C;CACNA1C;CACNA1C;CACNA1C | 4.87E-05          | 4.87E-05             | 0.253124           | -3.95064                     | T down vs N                            | 30.226  | 17.679    | 9.35834    | 1         |
| cg03626892  | C6orf176                                                        | 3.85E-06          | 3.85E-06             | 0.202867           | -4.92935                     | T down vs N                            | 47.03   | 23.8339   | 8.10846    | 1         |
| cg03627881  | EPHB1                                                           | 1.66E-05          | 1.66E-05             | 0.222628           | -4.4918                      | T down vs N                            | 36.705  | 21.1373   | 9.21398    | 1         |
| cg03627958  | GRB7;GRB7                                                       | 0.00657802        | 0.00657802           | 0.32831            | -3.0459                      | T down vs N                            | 9.7432  | 11.6191   | 19.0806    | 1         |
| cg03628719  | HAPLN3                                                          | 1.71E-05          | 1.71E-05             | 0.329491           | -3.03498                     | T down vs N                            | 36.506  | 11.5443   | 5.05964    | 1         |
| cg03629141  | SNORD113-4                                                      | 0.00048923        | 0.000489225          | 0.291804           | -3.42696                     | T down vs N                            | 18.982  | 14.2087   | 11.9766    | 1         |
| cg03629497  | CSMD3;CSMD3                                                     | 0.00024695        | 0.000246947          | 0.275764           | -3.62628                     | T down vs N                            | 21.976  | 15.543    | 11.3166    | 1         |
| cg03630088  | CPXM2                                                           | 2.75E-05          | 2.75E-05             | 4.46011            | 4.46011                      | T up vs N                              | 33.563  | 20.9385   | 9.98174    | 1         |
| cg03631455  | PCDH813                                                         | 6.62E-05          | 6.62E-05             | 6.57019            | 6.57019                      | T up vs N                              | 28.526  | 33.1934   | 18.6178    | 1         |
| cg03632782  | CDH13                                                           | 0.00039604        | 0.000396037          | 0.320252           | -3.12254                     | T down vs N                            | 19.879  | 12.1434   | 9.77364    | 1         |
| cg03635766  | IGFBP4                                                          | 0.00016836        | 0.00016836           | 0.29345            | -3.40773                     | T down vs N                            | 23.771  | 14.0791   | 9.47661    | 1         |
| cg03636394  | OASL;OASL                                                       | 2.48E-06          | 2.48E-06             | 0.219303           | -4.55989                     | T down vs N                            | 50.53   | 21.5627   | 6.82775    | 1         |
| cg03636657  | CPSF1;MIR1234                                                   | 8.73E-08          | 8.73E-08             | 0.215589           | -4.63845                     | T down vs N                            | 84.524  | 22.051    | 4.17415    | 1         |
| cg03637381  | AURKC;AURKC;AURKC                                               | 0.00504919        | 0.00504919           | 0.302833           | -3.30215                     | T down vs N                            | 10.545  | 13.3656   | 20.2793    | 1         |
| cg03639749  | ZNF26                                                           | 0.0022735         | 0.0022735            | 0.254549           | -3.92851                     | T down vs N                            | 13.144  | 17.5347   | 21.3446    | 1         |
| cg03641066  | C10orf11                                                        | 0.00305356        | 0.00305356           | 0.297089           | -3.366                       | T down vs N                            | 12.151  | 13.7976   | 18.1681    | 1         |
| cg03641251  | WFD2                                                            | 0.00104005        | 0.00104005           | 5.13105            | 5.13105                      | T up vs N                              | 15.971  | 25.0474   | 25.0936    | 1         |
| cg03649030  | SEC22B                                                          | 0.00010871        | 0.000108713          | 0.199879           | -5.00303                     | T down vs N                            | 25.931  | 24.2794   | 14.9812    | 1         |
| cg03649293  | PTPN7;PTPN7                                                     | 0.00351021        | 0.00351021           | 0.267623           | -3.73661                     | T down vs N                            | 11.961  | 15.3172   | 19.2088    | 1         |
| cg03650282  | PRKCA                                                           | 0.00011464        | 0.000114635          | 0.183051           | -5.46297                     | T down vs N                            | 25.662  | 27.0043   | 16.8368    | 1         |
| cg03650397  | EZR;EZR;EZR                                                     | 0.00271158        | 0.00271158           | 0.153606           | -6.51017                     | T down vs N                            | 12.847  | 30.9369   | 36.121     | 1         |
| cg03650674  | GRHL2                                                           | 1.53E-05          | 1.53E-05             | 18.7183            | 18.7183                      | T up vs N                              | 37.237  | 80.3801   | 34.5378    | 1         |
| cg03651478  | TAGLN2                                                          | 2.50E-06          | 2.50E-06             | 0.218857           | -4.5692                      | T down vs N                            | 50.46   | 21.6208   | 6.85556    | 1         |
| cg03651769  | KCNK2                                                           | 0.0001602         | 0.000160203          | 0.247822           | -4.03515                     | T down vs N                            | 24.01   | 18.2279   | 12.1469    | 1         |
| cg03652429  | MIR518D                                                         | 5.86E-05          | 5.86E-05             | 0.215333           | -4.64397                     | T down vs N                            | 29.197  | 22.0852   | 12.1027    | 1         |
| cg03653726  | GNA12                                                           | 0.00104797        | 0.00104797           | 0.252302           | -3.96351                     | T down vs N                            | 15.942  | 17.7628   | 17.8277    | 1         |
| cg03654598  | SHANK1                                                          | 0.00463105        | 0.00463105           | 0.296073           | -3.37755                     | T down vs N                            | 10.814  | 13.8755   | 20.5305    | 1         |
| cg03656092  | AZ1;AZ1                                                         | 1.50E-05          | 1.50E-05             | 0.24226            | -4.12779                     | T down vs N                            | 37.367  | 18.8259   | 8.06107    | 1         |
| cg03658985  | AVPR2                                                           | 0.00120955        | 0.00120955           | 0.281611           | -3.551                       | T down vs N                            | 15.402  | 15.0409   | 5.6246     | 1         |
| cg03659153  | TXNDC3                                                          | 0.00104091        | 0.00104091           | 0.263584           | -3.79385                     | T down vs N                            | 15.967  | 16.6522   | 16.6862    | 1         |
| cg03662014  | RRN3P2                                                          | 0.00355605        | 0.00355605           | 0.254875           | -3.92349                     | T down vs N                            | 11.653  | 17.502    | 24.0305    | 1         |
| cg03667047  | KL                                                              | 0.00022782        | 0.00022782           | 5.82007            | 5.82007                      | T up vs N                              | 22.346  | 29.0559   | 20.8043    | 1         |
| cg03667317  | FOXH1                                                           | 0.00135352        | 0.00135352           | 4.14106            | 4.14106                      | T up vs N                              | 14.986  | 18.9112   | 20.1908    | 1         |
| cg03669037  | CBFA2T3                                                         | 0.00042706        | 0.000427059          | 0.297915           | -3.35666                     | T down vs N                            | 19.556  | 13.7344   | 11.2368    | 1         |
| cg03670302  | SLC2A4                                                          | 8.20E-05          | 8.20E-05             | 0.130983           | -7.63458                     | T down vs N                            | 29.96   | 34.3994   | 16.0746    | 1         |
| cg03673298  | APOM                                                            | 0.00184444        | 0.00184444           | 0.278537           | -3.59018                     | T down vs N                            | 13.872  | 15.3025   | 17.6501    | 1         |
| cg03673470  | ZP4;LOC100130331                                                | 1.26E-06          | 1.26E-06             | 0.189721           | -5.2709                      | T down vs N                            | 56.309  | 25.8779   | 7.35308    | 1         |
| cg03673965  | NR2E1                                                           | 1.45E-05          | 1.45E-05             | 0.094986           | -10.5278                     | T down vs N                            | 37.58   | 51.9018   | 22.0975    | 1         |
| cg03674851  | USP27X;USP27X                                                   | 0.00061707        | 0.000617065          | 0.303694           | -3.29279                     | T down vs N                            | 18.024  | 13.3021   | 11.8086    | 1         |
| cg03677952  | MLC1;MLC1                                                       | 0.00101884        | 0.00101884           | 0.288861           | -3.46187                     | T down vs N                            | 16.049  | 14.4435   | 14.3994    | 1         |
| cg03678039  | CYGB                                                            | 0.00016198        | 0.00016198           | 0.199179           | -5.02062                     | T down vs N                            | 23.957  | 24.3853   | 16.2862    | 1         |
| cg03678062  | ZC3H12D                                                         | 1.68E-05          | 1.68E-05             | 8.11275            | 8.11275                      | T up vs N                              | 36.606  | 41.047    | 17.9413    | 1         |
| cg03678146  | CARD11                                                          | 0.00108602        | 0.00108602           | 0.166701           | -5.99878                     | T down vs N                            | 15.807  | 30.0623   | 30.4301    | 1         |
| cg03679305  | SLC2A5;SLC2A5;SLC2A5                                            | 0.00013376        | 0.000133755          | 0.210342           | -4.75416                     | T down vs N                            | 25.882  | 21.4257   | 12.4174    | 1         |
| cg03679504  | LRR2;LRR2;TDGF1                                                 | 0.00244002        | 0.00244002           | 3.64292            | 3.64292                      | T up vs N                              | 12.903  | 15.6536   | 19.4114    | 1         |
| cg03682568  | MGC23284;MGC23284                                               | 4.93E-06          | 4.93E-06             | 0.293104           | -3.41175                     | T down vs N                            | 45.148  | 14.1062   | 4.99915    | 1         |
| cg03686959  | GNL1                                                            | 6.62E-05          | 6.62E-05             | 0.304799           | -3.28085                     | T down vs N                            | 28.529  | 13.2212   | 7.41488    | 1         |
| cg03690334  | PODNL1;PODNL1;PODNL1                                            | 4.65E-06          | 4.65E-06             | 0.262757           | -3.80579                     | T down vs N                            | 45.583  | 16.7307   | 5.87268    | 1         |
| cg03693486  | CDA                                                             | 0.00013293        | 0.000132928          | 0.276995           | -3.61018                     | T down vs N                            | 24.923  | 15.4357   | 9.90954    | 1         |
| cg03695147  | KIAA0895L                                                       | 0.00032636        | 0.000326356          | 4.5328             | 4.5328                       | T up vs N                              | 20.723  | 21.3937   | 16.5179    | 1         |
| cg03696370  | PEBP4                                                           | 0.00134871        | 0.00134871           | 3.0979             | 3.0979                       | T up vs N                              | 14.999  | 11.975    | 12.7741    | 1         |
| cg03698716  | TMEM169;TMEM169;TMEM169;PECR                                    | 0.00200045        | 0.00200045           | 0.324496           | -3.0817                      | T down vs N                            | 13.587  | 11.8642   | 13.9713    | 1         |
| cg03699566  | FOLR1;FOLR1;FOLR1;FOLR1;FOLR1                                   | 0.00121554        | 0.00121554           | 0.275873           | -3.62486                     | T down vs N                            | 15.384  | 15.5335   | 16.1557    | 1         |
| cg03700402  | FAM92B                                                          | 0.00193214        | 0.00193214           | 0.184389           | -5.4233                      | T down vs N                            | 13.709  | 26.773    | 31.2484    | 1         |
| cg03701795  | CD1E;CD1E;CD1E;CD1E;CD1E                                        | 2.93E-06          | 2.93E-06             | 0.168847           | -5.92252                     | T down vs N                            | 49.183  | 29.6345   | 9.64048    | 1         |
| cg03703435  | MRPS17                                                          | 0.00211249        | 0.00211249           | 0.195625           | -5.11182                     | T down vs N                            | 13.397  | 24.9325   | 29.7759    | 1         |
| cg03704024  | TMCC1;TMCC1                                                     | 0.00071652        | 0.000716515          | 0.290076           | -3.44737                     | T down vs N                            | 17.422  | 14.346    | 13.1753    | 1         |
| cg03705384  | ALX1                                                            | 0.00115719        | 0.00115719           | 13.2526            | 13.2526                      | T up vs N                              | 17.161  | 51.8915   | 39.3098    | 1         |
| cg03707183  | PAPOLB;RADIL;PAPOLB                                             | 0.00065762        | 0.000657616          | 3.12271            | 3.12271                      | T up vs N                              | 17.766  | 12.1446   | 10.9375    | 1         |
| cg03708168  | CALB1                                                           | 4.62E-07          | 4.62E-07             | 0.310199           | -3.22374                     | T down vs N                            | 65.828  | 12.8332   | 3.11922    | 1         |
| cg03709468  | TD02                                                            | 1.23E-05          | 1.23E-05             | 0.190538           | -5.2483                      | T down vs N                            | 38.664  | 25.7443   | 10.6536    | 1         |
| cg03709925  | AATK                                                            | 0.00135883        | 0.00135883           | 3.07312            | 3.07312                      | T up vs N                              | 14.972  | 11.8055   | 12.6164    | 1         |
| cg03710889  | SLC11A1                                                         | 0.0007218         | 0.000721802          | 3.75302            | 3.75302                      | T up vs N                              | 17.392  | 16.383    | 15.0714    | 1         |

| Probeset ID                                                                             | UCSC_REFGENE_NAME             | p-value<br>(Type) | p-value (T vs.<br>N) | Ratio (T<br>vs. N) | Fold-<br>Change (T<br>vs. N) | Fold-Change (T vs.<br>N) (Description) | F(Type) | SS (Type) | SS (Error) | F (Error) |
|-----------------------------------------------------------------------------------------|-------------------------------|-------------------|----------------------|--------------------|------------------------------|----------------------------------------|---------|-----------|------------|-----------|
| cg03711485                                                                              | NKX2-3                        | 9.33E-05          | 9.33E-05             | 0.159063           | -6.28683                     | T down vs N                            | 26.715  | 31.6569   | 18.9597    | 1         |
| cg03714110                                                                              | NR2F1                         | 0.00228151        | 0.00228151           | 0.292677           | -3.41674                     | T down vs N                            | 13.132  | 14.1398   | 17.2279    | 1         |
| cg03714522                                                                              | AGAP3                         | 5.69E-06          | 5.69E-06             | 3.72348            | 3.72348                      | T up vs N                              | 44.081  | 16.1878   | 5.87564    | 1         |
| cg03714916                                                                              | CDKN1A;CDKN1A                 | 8.62E-07          | 8.62E-07             | 0.325848           | -3.06892                     | T down vs N                            | 59.764  | 11.7767   | 3.15284    | 1         |
| cg03716388                                                                              | MDFIC;MDFIC                   | 0.00013527        | 0.000135265          | 0.27489            | -3.63782                     | T down vs N                            | 24.837  | 15.6197   | 10.0624    | 1         |
| cg03717424                                                                              | OPHN1                         | 0.00013097        | 0.000130969          | 0.274833           | -3.63857                     | T down vs N                            | 24.996  | 15.6247   | 10.0013    | 1         |
| cg03718677                                                                              | TMOD4                         | 0.00033955        | 0.00033955           | 0.305095           | -3.27767                     | T down vs N                            | 20.548  | 13.1996   | 10.2778    | 1         |
| cg03719032                                                                              | HAPLN4                        | 1.55E-05          | 1.55E-05             | 0.241123           | -4.14727                     | T down vs N                            | 37.134  | 18.9511   | 8.16545    | 1         |
| cg03719070                                                                              | RTKN;RTKN;RTKN;RTKN           | 0.00012287        | 0.000122869          | 3.2987             | 3.2987                       | T up vs N                              | 25.314  | 13.3422   | 8.43311    | 1         |
| cg03719092                                                                              | SLC05A1;SLC05A1;SLC05A1       | 5.95E-05          | 5.95E-05             | 5.55552            | 5.55552                      | T up vs N                              | 29.109  | 27.5413   | 15.1385    | 1         |
| GUCY1A3;GUCY1A3;GUCY1A3;GUCY1A3;GUCY1A3;GUCY1A3;GUCY1A3;GUCY1A3;GUCY1A3;GUCY1A3;GUCY1A3 |                               |                   |                      |                    |                              |                                        |         |           |            |           |
| cg03719283                                                                              | Y1A3;GUCY1A3;GUCY1A3;GUCY1A3  | 0.00044123        | 0.000441232          | 0.262698           | -3.80665                     | T down vs N                            | 19.417  | 16.7364   | 13.7908    | 1         |
| cg03719555                                                                              | UBXN6;UBXN6                   | 0.00442655        | 0.00442655           | 0.270911           | -3.69125                     | T down vs N                            | 10.955  | 15.9744   | 23.3308    | 1         |
| cg03720617                                                                              | PHKB;PHKB                     | 0.00034202        | 0.000342021          | 0.287484           | -3.47845                     | T down vs N                            | 20.517  | 14.5548   | 11.3507    | 1         |
| cg03726785                                                                              | SIRPD                         | 0.00013292        | 0.000132922          | 0.196584           | -5.08688                     | T down vs N                            | 24.923  | 24.7832   | 15.9104    | 1         |
| cg03727732                                                                              | CLK3                          | 9.67E-06          | 9.67E-06             | 0.217575           | -4.59613                     | T down vs N                            | 40.303  | 21.7883   | 8.64979    | 1         |
| cg03729553                                                                              | MSLNL                         | 5.25E-05          | 5.25E-05             | 0.301167           | -3.32042                     | T down vs N                            | 29.799  | 13.4893   | 7.24288    | 1         |
| cg03729603                                                                              | CACNG3                        | 2.79E-05          | 2.79E-05             | 0.259215           | -3.85781                     | T down vs N                            | 33.47   | 17.0723   | 8.16117    | 1         |
| cg03729818                                                                              | SORCS2                        | 4.43E-05          | 4.43E-05             | 0.23257            | -4.29978                     | T down vs N                            | 30.755  | 19.9256   | 10.3662    | 1         |
| cg03730389                                                                              | ATP8B1                        | 6.79E-06          | 6.79E-06             | 4.12445            | 4.12445                      | T up vs N                              | 42.79   | 18.8044   | 7.03138    | 1         |
| cg03731131                                                                              | KCNN4                         | 0.00166207        | 0.00166207           | 3.73328            | 3.73328                      | T up vs N                              | 14.242  | 16.2526   | 18.2592    | 1         |
| cg03731268                                                                              | L1TD1;L1TD1                   | 0.00013207        | 0.00013207           | 9.37892            | 9.37892                      | T up vs N                              | 24.955  | 46.9312   | 30.0905    | 1         |
| cg03732020                                                                              | NR1H3;NR1H3;NR1H3             | 0.00217153        | 0.00217153           | 0.247618           | -4.03848                     | T down vs N                            | 13.302  | 18.2495   | 21.9509    | 1         |
| cg03733219                                                                              | SPRED3                        | 0.00094458        | 0.000944576          | 3.26592            | 3.26592                      | T up vs N                              | 16.339  | 13.1198   | 12.8477    | 1         |
| cg03734104                                                                              | CCDC73                        | 5.55E-06          | 5.55E-06             | 0.314772           | -3.1769                      | T down vs N                            | 44.257  | 12.5143   | 4.52424    | 1         |
| cg03734595                                                                              | TWSG1                         | 0.00144217        | 0.00144217           | 3.4397             | 3.4397                       | T up vs N                              | 14.754  | 14.2944   | 15.5017    | 1         |
| cg03737999                                                                              | MFNG;MFNG;MFNG                | 0.00383752        | 0.00383752           | 0.313113           | -3.19373                     | T down vs N                            | 11.408  | 12.629    | 17.7125    | 1         |
| cg03739378                                                                              | ATXN7L1;ATXN7L1               | 0.00089489        | 0.000894894          | 0.260208           | -3.84308                     | T down vs N                            | 16.548  | 16.9757   | 16.414     | 1         |
| cg03743037                                                                              | AGBL3                         | 1.94E-06          | 1.94E-06             | 0.16911            | -5.91331                     | T down vs N                            | 52.578  | 29.5827   | 9.00236    | 1         |
| cg03743720                                                                              | ANKMY1;ANKMY1                 | 2.39E-06          | 2.39E-06             | 3.57404            | 3.57404                      | T up vs N                              | 50.842  | 15.1948   | 4.78181    | 1         |
| cg03744383                                                                              | CES1;CES1;CES1;CES1;CES1;CES1 | 0.00016434        | 0.000164339          | 4.10789            | 4.10789                      | T up vs N                              | 23.887  | 18.6978   | 12.5242    | 1         |
| cg03744763                                                                              | HOXA5                         | 0.001643          | 0.001643             | 5.22376            | 5.22376                      | T up vs N                              | 14.283  | 25.5989   | 28.6762    | 1         |
| cg03746520                                                                              | GAGE10                        | 2.11E-05          | 2.11E-05             | 0.131037           | -7.63142                     | T down vs N                            | 35.184  | 38.6835   | 17.5916    | 1         |
| cg03747002                                                                              | GUCY2D                        | 0.00019205        | 0.000192045          | 3.09323            | 3.09323                      | T up vs N                              | 23.144  | 11.9431   | 8.25653    | 1         |
| cg03747345                                                                              | FCGBP                         | 0.00023267        | 0.000232671          | 0.221006           | -4.52476                     | T down vs N                            | 22.249  | 21.3435   | 15.3489    | 1         |
| cg03748429                                                                              | ESX1                          | 0.00025233        | 0.000252331          | 6.61863            | 6.61863                      | T up vs N                              | 21.877  | 33.4529   | 24.4662    | 1         |
| cg03751055                                                                              | MGMT                          | 0.00016335        | 0.000163348          | 0.329842           | -3.03176                     | T down vs N                            | 23.916  | 11.5222   | 7.70841    | 1         |
| cg03752203                                                                              | AZIN1;AZIN1                   | 0.00012335        | 0.000123354          | 0.226185           | -4.42116                     | T down vs N                            | 25.294  | 20.6935   | 13.0898    | 1         |
| cg03752977                                                                              | ZFP41                         | 7.29E-06          | 7.29E-06             | 0.253492           | -3.94489                     | T down vs N                            | 42.285  | 17.6415   | 6.67531    | 1         |
| cg03755333                                                                              | GATAD2A                       | 5.64E-05          | 5.64E-05             | 0.239535           | -4.17476                     | T down vs N                            | 29.403  | 19.1276   | 10.4085    | 1         |
| PCDHA2;PCDHA1;PCDHA1;PCDHA6;PCDHA5;PCDHA6;PCDHA3;PCDHA4;PCD                             |                               |                   |                      |                    |                              |                                        |         |           |            |           |
| cg03758467                                                                              | HA6                           | 0.00076685        | 0.000766849          | 3.6893             | 3.6893                       | T up vs N                              | 17.152  | 15.9615   | 14.8894    | 1         |
| cg03760483                                                                              | ALOX12                        | 4.76E-05          | 4.76E-05             | 3.08673            | 3.08673                      | T up vs N                              | 30.351  | 11.8986   | 6.27251    | 1         |
| cg03760490                                                                              | GJB3                          | 0.00012077        | 0.000120765          | 0.242178           | -4.12919                     | T down vs N                            | 25.4    | 18.8349   | 11.8643    | 1         |
| cg03761113                                                                              | CD5L                          | 0.00241441        | 0.00241441           | 0.288309           | -3.4685                      | T down vs N                            | 12.939  | 14.488    | 17.9162    | 1         |
| cg03761141                                                                              | TMEM19                        | 0.00366296        | 0.00366296           | 0.304223           | -3.28706                     | T down vs N                            | 11.558  | 13.2633   | 18.3614    | 1         |
| cg03762081                                                                              | KLK10;KLK10;KLK10             | 9.34E-05          | 9.34E-05             | 0.315283           | -3.17175                     | T down vs N                            | 26.708  | 12.4792   | 7.47609    | 1         |
| cg03762994                                                                              | ALOX12                        | 5.82E-05          | 5.82E-05             | 3.99882            | 3.99882                      | T up vs N                              | 29.232  | 17.9923   | 9.84794    | 1         |
| cg03763118                                                                              | LGR4                          | 1.62E-05          | 1.62E-05             | 0.179243           | -5.7902                      | T down vs N                            | 36.867  | 27.6771   | 12.0117    | 1         |
| cg03763873                                                                              | EPSTI1;EPSTI1                 | 0.00050943        | 0.000509427          | 0.301018           | -3.32206                     | T down vs N                            | 18.813  | 13.5004   | 11.4819    | 1         |
| cg03764585                                                                              | FMOD;FMOD                     | 5.54E-06          | 5.54E-06             | 0.262861           | -3.80429                     | T down vs N                            | 44.278  | 16.7208   | 6.04208    | 1         |
| cg03765041                                                                              | ESYT2                         | 7.25E-06          | 7.25E-06             | 0.30188            | -3.31257                     | T down vs N                            | 42.325  | 13.4362   | 5.07926    | 1         |
| cg03766965                                                                              | SRCAP                         | 2.17E-05          | 2.17E-05             | 0.217078           | -4.60664                     | T down vs N                            | 35.006  | 21.8536   | 9.98866    | 1         |
| cg03767475                                                                              | COMP                          | 5.28E-06          | 5.28E-06             | 0.14751            | -6.7792                      | T down vs N                            | 44.637  | 34.3069   | 12.2972    | 1         |
| cg03770907                                                                              | NLRP13                        | 0.00026733        | 0.000267333          | 0.283595           | -3.52616                     | T down vs N                            | 21.615  | 14.8746   | 11.0108    | 1         |
| cg03771004                                                                              | NR1H4;NR1H4                   | 0.00052517        | 0.000525165          | 0.30041            | -3.32878                     | T down vs N                            | 18.686  | 13.5459   | 11.5987    | 1         |
| cg03771580                                                                              | OR5A2                         | 2.19E-07          | 2.19E-07             | 0.172687           | -5.79083                     | T down vs N                            | 73.746  | 28.89     | 6.26804    | 1         |
| cg03771939                                                                              | TBC1D12                       | 0.00061874        | 0.000618738          | 0.303175           | -3.29843                     | T down vs N                            | 18.013  | 13.3403   | 11.8498    | 1         |
| cg03773882                                                                              | OR1C1                         | 0.0029498         | 0.0029498            | 0.289594           | -3.45311                     | T down vs N                            | 12.265  | 14.3846   | 18.7644    | 1         |
| cg03775802                                                                              | MIR609;C10orf79               | 2.29E-06          | 2.29E-06             | 0.199644           | -5.00892                     | T down vs N                            | 51.168  | 24.3148   | 7.60315    | 1         |
| cg03776878                                                                              | GPR133                        | 0.00013433        | 0.000134328          | 0.289208           | -3.45772                     | T down vs N                            | 24.871  | 14.4156   | 9.2739     | 1         |
| cg03778029                                                                              | CCDC68;CCDC68                 | 0.00025585        | 0.000255847          | 8.85275            | 8.85275                      | T up vs N                              | 21.814  | 44.5415   | 32.6701    | 1         |
| cg03779973                                                                              | DCLK2;DCLK2                   | 0.0013265         | 0.0013265            | 0.314066           | -3.18404                     | T down vs N                            | 15.06   | 12.563    | 13.3469    | 1         |
| cg03780486                                                                              | OR6A2                         | 7.62E-06          | 7.62E-06             | 0.251411           | -3.97755                     | T down vs N                            | 41.971  | 17.8541   | 6.80625    | 1         |
| cg03780561                                                                              | GPRC5B                        | 0.00032344        | 0.00032344           | 9.69493            | 9.69493                      | T up vs N                              | 21.488  | 45.4881   | 31.7543    | 1         |
| cg03780851                                                                              | GRHL2                         | 0.00013727        | 0.000137273          | 10.2322            | 10.2322                      | T up vs N                              | 24.764  | 50.6537   | 32.7275    | 1         |
| cg03785456                                                                              | NCKAP5;NCKAP5                 | 1.03E-05          | 1.03E-05             | 0.157326           | -6.35622                     | T down vs N                            | 39.865  | 32.0361   | 12.8577    | 1         |
| cg03787864                                                                              | CYBA                          | 5.96E-06          | 5.96E-06             | 16.3775            | 16.3775                      | T up vs N                              | 43.734  | 73.2164   | 26.7859    | 1         |
| cg03788215                                                                              | SALL3                         | 0.00079137        | 0.000791365          | 0.331264           | -3.01874                     | T down vs N                            | 17.028  | 11.433    | 10.7428    | 1         |

| Probeset ID                                                                             | UCSC_REFGENE_NAME       | p-value<br>(Type) | p-value (T vs.<br>N) | Ratio (T<br>vs. N) | Fold-<br>Change (T<br>vs. N) | Fold-Change (T vs.<br>N) (Description) | F(Type) | SS (Type) | SS (Error) | F (Error) |
|-----------------------------------------------------------------------------------------|-------------------------|-------------------|----------------------|--------------------|------------------------------|----------------------------------------|---------|-----------|------------|-----------|
| cg03789645                                                                              | CUL1                    | 0.00014515        | 0.000145152          | 0.218817           | -4.57004                     | T down vs N                            | 24.49   | 21.626    | 14.129     | 1         |
| cg03789934                                                                              | NLRP11                  | 3.64E-05          | 3.64E-05             | 0.308816           | -3.23818                     | T down vs N                            | 31.894  | 12.9314   | 6.48712    | 1         |
| cg03793368                                                                              | MAGEC2                  | 5.71E-06          | 5.71E-06             | 0.211248           | -4.73377                     | T down vs N                            | 44.051  | 22.6395   | 8.22303    | 1         |
| cg03796890                                                                              | TMEM17                  | 0.00235327        | 0.00235327           | 0.252757           | -3.95637                     | T down vs N                            | 13.026  | 17.7163   | 21.7612    | 1         |
| cg03797906                                                                              | TRIL;TRIL               | 0.00014527        | 0.000145272          | 0.314152           | -3.18317                     | T down vs N                            | 24.486  | 12.557    | 8.2053     | 1         |
| cg03797957                                                                              | CLP1;CLP1               | 0.00021945        | 0.00021945           | 0.269126           | -3.71573                     | T down vs N                            | 22.519  | 16.1365   | 11.4649    | 1         |
| cg03798217                                                                              | GPR113                  | 4.46E-06          | 4.46E-06             | 0.211247           | -4.73379                     | T down vs N                            | 45.897  | 22.6396   | 7.89241    | 1         |
| cg03798603                                                                              | SFTA2                   | 1.16E-05          | 1.16E-05             | 0.265352           | -3.76858                     | T down vs N                            | 39.074  | 16.4857   | 6.75061    | 1         |
| cg03798942                                                                              | FLI1;FLI1               | 6.06E-05          | 6.06E-05             | 0.207499           | -4.81929                     | T down vs N                            | 29.013  | 23.164    | 12.7744    | 1         |
| cg03799024                                                                              | MIR515-2;MIR515-1       | 8.64E-06          | 8.64E-06             | 0.182262           | -5.4866                      | T down vs N                            | 41.082  | 27.1418   | 10.5709    | 1         |
| cg03799581                                                                              | MAD2L1                  | 0.0004483         | 0.0004483            | 0.241133           | -4.14709                     | T down vs N                            | 19.35   | 18.95     | 15.6693    | 1         |
| cg03800253                                                                              | GALN19                  | 0.00035044        | 0.000350442          | 0.273004           | -3.66295                     | T down vs N                            | 20.41   | 15.7867   | 12.3756    | 1         |
| cg03800281                                                                              | LRRC20;LRRC20;LRRC20    | 0.0001394         | 0.000139399          | 0.270676           | -3.69446                     | T down vs N                            | 24.688  | 15.9957   | 10.3665    | 1         |
| cg03802272                                                                              | GFM1                    | 0.00012569        | 0.00012569           | 0.226831           | -4.40856                     | T down vs N                            | 25.201  | 20.6142   | 13.088     | 1         |
| cg03802461                                                                              | LTBP2                   | 0.00172845        | 0.00172845           | 5.62771            | 5.62771                      | T up vs N                              | 14.102  | 27.9576   | 31.7204    | 1         |
| cg03803818                                                                              | IFT81;IFT81             | 3.41E-07          | 3.41E-07             | 0.297014           | -3.36684                     | T down vs N                            | 68.959  | 13.8033   | 3.20265    | 1         |
| cg03804500                                                                              | ANAPC2;SSNA1            | 3.24E-06          | 3.24E-06             | 0.287845           | -3.4741                      | T down vs N                            | 48.387  | 14.5256   | 4.80312    | 1         |
| cg03805182                                                                              | ZFHX3;ZFHX3             | 0.00015542        | 0.000155424          | 0.231453           | -4.32053                     | T down vs N                            | 24.157  | 20.0574   | 13.2849    | 1         |
| cg03806095                                                                              | GPR124                  | 0.00313978        | 0.00313978           | 13.9209            | 13.9209                      | T up vs N                              | 12.059  | 64.9518   | 86.1767    | 1         |
| cg03806868                                                                              | FLAD1;FLAD1             | 9.95E-05          | 9.95E-05             | 0.175961           | -5.68308                     | T down vs N                            | 26.383  | 28.2753   | 17.1474    | 1         |
| cg03807316                                                                              | DLL3;DLL3               | 0.00033404        | 0.00033404           | 4.37435            | 4.37435                      | T up vs N                              | 20.62   | 20.3982   | 15.8276    | 1         |
| cg03807391                                                                              | LY6G6F                  | 2.96E-05          | 2.96E-05             | 0.294407           | -3.39666                     | T down vs N                            | 33.105  | 14.0045   | 6.76848    | 1         |
| cg03808027                                                                              | LMLN;LMLN;LMLN;LMLN     | 0.00277532        | 0.00277532           | 3.31359            | 3.31359                      | T up vs N                              | 12.468  | 13.4431   | 17.2507    | 1         |
| cg03808351                                                                              | PHF19                   | 7.70E-06          | 7.70E-06             | 5.22118            | 5.22118                      | T up vs N                              | 41.889  | 25.5836   | 9.77204    | 1         |
| cg03812751                                                                              | OR8U8;OR5M9             | 6.62E-06          | 6.62E-06             | 0.144503           | -6.92025                     | T down vs N                            | 42.978  | 35.0491   | 13.0483    | 1         |
| cg03814321                                                                              | TTC39A                  | 0.00022533        | 0.000225332          | 3.3595             | 3.3595                       | T up vs N                              | 22.397  | 13.7537   | 9.82544    | 1         |
| cg03816707                                                                              | KCNS1                   | 3.02E-05          | 3.02E-05             | 6.18645            | 6.18645                      | T up vs N                              | 32.998  | 31.105    | 15.082     | 1         |
| cg03818395                                                                              | ANKRD22                 | 1.69E-05          | 1.69E-05             | 0.287977           | -3.4725                      | T down vs N                            | 36.586  | 14.5149   | 6.34765    | 1         |
| cg03818576                                                                              | LRRC4C                  | 0.0006267         | 0.000626699          | 0.321098           | -3.11431                     | T down vs N                            | 17.961  | 12.0872   | 10.7677    | 1         |
| cg03818583                                                                              | ATP5EP2                 | 0.00010825        | 0.000108253          | 0.216084           | -4.62782                     | T down vs N                            | 25.952  | 21.9851   | 13.5543    | 1         |
| cg03819286                                                                              | MGRN1;MGRN1;MGRN1;MGRN1 | 3.36E-07          | 3.36E-07             | 0.170574           | -5.86254                     | T down vs N                            | 69.108  | 29.2963   | 6.78276    | 1         |
| cg03819692                                                                              | C16orf81                | 0.00026659        | 0.000266594          | 0.243873           | -4.10049                     | T down vs N                            | 21.627  | 18.6501   | 13.7976    | 1         |
| cg03821557                                                                              | KIF18B                  | 8.15E-07          | 8.15E-07             | 0.206133           | -4.85124                     | T down vs N                            | 60.286  | 23.359    | 6.19955    | 1         |
| cg03822198                                                                              | MAP1LC3B2               | 5.38E-05          | 5.38E-05             | 0.119613           | -8.36029                     | T down vs N                            | 29.662  | 42.2341   | 22.7812    | 1         |
| cg03823901                                                                              | OR5211                  | 0.00026262        | 0.000262617          | 0.20091            | -4.97734                     | T down vs N                            | 22.477  | 22.7053   | 15.1521    | 1         |
| cg03824238                                                                              | MIR133B                 | 1.57E-05          | 1.57E-05             | 0.221846           | -4.50763                     | T down vs N                            | 37.07   | 21.2364   | 9.16607    | 1         |
| cg03826594                                                                              | ITGA5                   | 0.00483581        | 0.00483581           | 0.3164             | -3.16056                     | T down vs N                            | 10.905  | 11.6733   | 16.0563    | 1         |
| cg03826976                                                                              | CYB5R2                  | 0.00342511        | 0.00342511           | 3.51103            | 3.51103                      | T up vs N                              | 11.775  | 14.7733   | 20.0744    | 1         |
| cg03827118                                                                              | RAB5A                   | 1.81E-05          | 1.81E-05             | 0.162446           | -6.15589                     | T down vs N                            | 36.142  | 30.9362   | 13.6954    | 1         |
| cg03827626                                                                              | SOX2;SOX2OT;SOX2        | 0.00026189        | 0.000261885          | 0.303813           | -3.2915                      | T down vs N                            | 21.708  | 13.2934   | 9.79801    | 1         |
| cg03828557                                                                              | OR5212                  | 8.83E-07          | 8.83E-07             | 0.206657           | -4.83894                     | T down vs N                            | 59.546  | 23.284    | 6.25638    | 1         |
| cg03829320                                                                              | ZNF267                  | 8.82E-05          | 8.82E-05             | 4.42952            | 4.42952                      | T up vs N                              | 27.007  | 20.7461   | 12.291     | 1         |
| cg03830597                                                                              | PAN3;PAN3               | 5.11E-05          | 5.11E-05             | 0.255332           | -3.91647                     | T down vs N                            | 29.951  | 17.4561   | 9.32509    | 1         |
| cg03830929                                                                              | TPM3                    | 5.92E-07          | 5.92E-07             | 0.104345           | -9.58359                     | T down vs N                            | 63.358  | 47.8408   | 12.0814    | 1         |
| cg03832737                                                                              | THSD4                   | 0.00010344        | 0.00010344           | 0.330864           | -3.02239                     | T down vs N                            | 26.184  | 11.458    | 7.00161    | 1         |
| cg03833273                                                                              | UTP15                   | 0.00315898        | 0.00315898           | 0.308663           | -3.23978                     | T down vs N                            | 12.039  | 12.9423   | 17.2001    | 1         |
| PCDHGA4;PCDHGA6;PCDHGA1;PCDHG<br>A5;PCDHGB1;PCDHGA6;PCDHGA3;PC<br>DHGA2;PCDHGB2;PCDHGB3 |                         |                   |                      |                    |                              |                                        |         |           |            |           |
| cg03835609                                                                              | DHGA2;PCDHGB2;PCDHGB3   | 0.00102538        | 0.00102538           | 6.48086            | 6.48086                      | T up vs N                              | 16.487  | 30.7881   | 28.0113    | 1         |
| cg03838168                                                                              | RBM3                    | 0.00332995        | 0.00332995           | 0.242478           | -4.12408                     | T down vs N                            | 11.867  | 18.8021   | 25.3512    | 1         |
| cg03840467                                                                              | 9-Sep                   | 6.89E-06          | 6.89E-06             | 5.20754            | 5.20754                      | T up vs N                              | 42.69   | 25.5027   | 9.5583     | 1         |
| cg03841065                                                                              | SLA2;SLA2               | 1.07E-05          | 1.07E-05             | 0.078413           | -12.7529                     | T down vs N                            | 39.58   | 60.7012   | 24.5383    | 1         |
| cg03842617                                                                              | NOS3                    | 0.00024117        | 0.000241171          | 0.32796            | -3.04915                     | T down vs N                            | 22.084  | 11.6414   | 8.43429    | 1         |
| cg03842933                                                                              | DCHS2;DCHS2             | 1.63E-05          | 1.63E-05             | 0.268939           | -3.71831                     | T down vs N                            | 36.827  | 16.1536   | 7.01821    | 1         |
| cg03845359                                                                              | ARSF                    | 1.98E-05          | 1.98E-05             | 0.212582           | -4.70407                     | T down vs N                            | 35.562  | 22.4566   | 10.1035    | 1         |
| cg03845745                                                                              | CBR4                    | 2.33E-05          | 2.33E-05             | 0.2629             | -3.80373                     | T down vs N                            | 34.568  | 16.7172   | 7.73775    | 1         |
| cg03846076                                                                              | STC2                    | 0.00535814        | 0.00535814           | 0.271142           | -3.6881                      | T down vs N                            | 10.363  | 15.9535   | 24.6324    | 1         |
| cg03847796                                                                              | C1orf161                | 1.50E-05          | 1.50E-05             | 0.192318           | -5.19973                     | T down vs N                            | 37.358  | 25.4563   | 10.9027    | 1         |
| cg03851861                                                                              | MIR548G                 | 0.00046559        | 0.000465589          | 0.25383            | -3.93965                     | T down vs N                            | 19.19   | 17.6074   | 14.6804    | 1         |
| cg03851956                                                                              | OR4C3                   | 1.65E-05          | 1.65E-05             | 0.299235           | -3.34185                     | T down vs N                            | 36.755  | 13.6344   | 5.93518    | 1         |
| cg03852670                                                                              | SLC10A4                 | 8.43E-06          | 8.43E-06             | 0.239471           | -4.17587                     | T down vs N                            | 41.258  | 19.1347   | 7.42059    | 1         |
| cg03853593                                                                              | SOX30;SOX30             | 0.00340283        | 0.00340283           | 0.285574           | -3.50172                     | T down vs N                            | 11.796  | 14.7109   | 19.9536    | 1         |
| cg03853861                                                                              | EDA2R                   | 0.00145947        | 0.00145947           | 0.214394           | -4.6643                      | T down vs N                            | 14.711  | 22.211    | 24.1579    | 1         |
| cg03854667                                                                              | SEPT10;SEPT10;ANKRD57   | 9.47E-06          | 9.47E-06             | 0.21185            | -4.72031                     | T down vs N                            | 40.446  | 22.5567   | 8.92326    | 1         |
| cg03856044                                                                              | APCS;APCS               | 4.40E-06          | 4.40E-06             | 0.189339           | -5.28154                     | T down vs N                            | 45.997  | 25.9407   | 9.02348    | 1         |
| cg03856153                                                                              | PTPRG                   | 6.54E-05          | 6.54E-05             | 0.310177           | -3.22397                     | T down vs N                            | 28.599  | 12.8348   | 7.18055    | 1         |
| cg03856366                                                                              | SMUG1                   | 0.00261041        | 0.00261041           | 0.314082           | -3.18388                     | T down vs N                            | 12.674  | 12.5619   | 15.8584    | 1         |
| cg03856401                                                                              | MVP;MVP                 | 0.00209534        | 0.00209534           | 0.214659           | -4.65855                     | T down vs N                            | 13.426  | 22.1754   | 26.4275    | 1         |
| cg03856949                                                                              | METTL7A                 | 0.00064521        | 0.000645207          | 0.299715           | -3.33651                     | T down vs N                            | 17.843  | 13.5982   | 12.1938    | 1         |
| cg03859614                                                                              | WDR24                   | 0.00025431        | 0.00025431           | 0.307831           | -3.24853                     | T down vs N                            | 21.841  | 13.0018   | 9.52451    | 1         |
| cg03859673                                                                              | JUP;JUP                 | 0.00035604        | 0.000356042          | 0.150172           | -6.65903                     | T down vs N                            | 20.341  | 33.6687   | 26.4836    | 1         |

| Probeset ID | UCSC_REFGENE_NAME                                          | p-value<br>(Type) | p-value (T vs.<br>N) | Ratio (T<br>vs. N) | Fold-<br>Change (T<br>vs. N) | Fold-Change (T vs.<br>N) (Description) | F(Type) | SS (Type) | SS (Error) | F (Error) |
|-------------|------------------------------------------------------------|-------------------|----------------------|--------------------|------------------------------|----------------------------------------|---------|-----------|------------|-----------|
| cg03860013  | C20orf70;C20orf70                                          | 0.00176855        | 0.00176855           | 0.299902           | -3.33443                     | T down vs N                            | 14.021  | 13.5841   | 15.502     | 1         |
| cg03861427  | HLA-H                                                      | 3.56E-05          | 3.56E-05             | 5.36142            | 5.36142                      | T up vs N                              | 32.01   | 26.4108   | 13.2013    | 1         |
| cg03862987  | G3BP2;G3BP2;G3BP2                                          | 1.07E-05          | 1.07E-05             | 0.200876           | -4.9782                      | T down vs N                            | 39.583  | 24.1295   | 9.75347    | 1         |
| cg03863143  | OR1F2P                                                     | 0.00034424        | 0.000344236          | 0.278041           | -3.5966                      | T down vs N                            | 20.488  | 15.3452   | 11.9836    | 1         |
| cg03870138  | CYBA                                                       | 8.69E-05          | 8.69E-05             | 3.36105            | 3.36105                      | T up vs N                              | 27.082  | 13.7641   | 8.13179    | 1         |
| cg03871930  | VP52                                                       | 0.0006472         | 0.000647195          | 0.31019            | -3.22383                     | T down vs N                            | 17.83   | 12.8338   | 11.5164    | 1         |
| cg03873264  | KIF25;KIF25                                                | 0.00016071        | 0.000160706          | 0.322299           | -3.10271                     | T down vs N                            | 23.995  | 12.0079   | 8.00698    | 1         |
| cg03873930  | ARFRP1;ZGPAT;ZGPAT;ZGPAT;ARFRP1                            | 0.00012384        | 0.000123835          | 0.250987           | -3.98427                     | T down vs N                            | 25.275  | 17.8978   | 11.33      | 1         |
| cg03874653  | MYLK;MYLK;MYLK;MYLK                                        | 3.06E-05          | 3.06E-05             | 0.310632           | -3.21924                     | T down vs N                            | 32.909  | 12.8026   | 6.22458    | 1         |
| cg03875678  | GZMB                                                       | 3.99E-05          | 3.99E-05             | 0.268329           | -3.72677                     | T down vs N                            | 31.353  | 16.2095   | 8.27209    | 1         |
| cg03878654  | ZFHX3;ZFHX3                                                | 0.00032527        | 0.000325271          | 0.294595           | -3.39449                     | T down vs N                            | 20.738  | 13.9899   | 10.7938    | 1         |
| cg03880173  | SOX2OT                                                     | 2.59E-06          | 2.59E-06             | 9.31508            | 9.31508                      | T up vs N                              | 50.178  | 46.6453   | 14.8736    | 1         |
| cg03881382  | KRTAP9-3;KRTAP9-9                                          | 5.90E-06          | 5.90E-06             | 0.138969           | -7.19584                     | T down vs N                            | 43.818  | 36.4785   | 13.32      | 1         |
| cg03881934  | LCE1B                                                      | 0.00032547        | 0.000325474          | 0.211167           | -4.7356                      | T down vs N                            | 20.735  | 22.6508   | 17.4784    | 1         |
| cg03882437  | GRIN1;GRIN1;GRIN1                                          | 1.50E-05          | 1.50E-05             | 8.00441            | 8.00441                      | T up vs N                              | 37.376  | 40.5215   | 17.3467    | 1         |
| cg03882612  | ZACN                                                       | 2.61E-05          | 2.61E-05             | 0.148355           | -6.74061                     | T down vs N                            | 33.874  | 34.1025   | 16.1081    | 1         |
| cg03883502  | PPP1R3G                                                    | 5.68E-05          | 5.68E-05             | 4.72192            | 4.72192                      | T up vs N                              | 29.367  | 22.5666   | 12.2948    | 1         |
| cg03884270  | SNORD87;SNHG6                                              | 0.00018187        | 0.000181869          | 0.143014           | -6.99232                     | T down vs N                            | 23.402  | 35.4256   | 24.2206    | 1         |
| cg03885252  | KLKBL4                                                     | 0.00406824        | 0.00406824           | 0.312124           | -3.20385                     | T down vs N                            | 11.222  | 12.6979   | 18.1047    | 1         |
| cg03887094  | HSF4;HSF4                                                  | 0.00018869        | 0.000188693          | 3.99083            | 3.99083                      | T up vs N                              | 23.227  | 17.9404   | 12.3582    | 1         |
| cg03887417  | BTN2A1;BTN2A1                                              | 0.00513944        | 0.00513944           | 0.282549           | -3.53921                     | T down vs N                            | 10.491  | 14.962    | 22.8197    | 1         |
| cg03888064  | CCT3;CCT3;CCT3;C1orf182                                    | 0.00024748        | 0.000247478          | 0.274921           | -3.6374                      | T down vs N                            | 21.966  | 15.6169   | 11.3755    | 1         |
| cg03888553  | NCRNA00169;CRYM                                            | 1.88E-05          | 1.88E-05             | 0.288226           | -3.4695                      | T down vs N                            | 35.916  | 14.4947   | 6.45714    | 1         |
| cg03890037  | LVRN                                                       | 0.00383593        | 0.00383593           | 6.96948            | 6.96948                      | T up vs N                              | 11.409  | 35.3065   | 49.5125    | 1         |
| cg03890691  | DOC2A                                                      | 0.00096765        | 0.00096765           | 4.35048            | 4.35048                      | T up vs N                              | 16.246  | 20.2472   | 19.9405    | 1         |
| cg03892735  | MYLK;MYLK;MYLK;MYLK                                        | 0.0008088         | 0.000808804          | 0.296871           | -3.36847                     | T down vs N                            | 16.942  | 13.8142   | 13.046     | 1         |
| cg03894450  | BCL7B                                                      | 2.16E-05          | 2.16E-05             | 0.255518           | -3.91361                     | T down vs N                            | 35.024  | 17.4375   | 7.96595    | 1         |
| cg03894975  | PTPRU;PTPRU;PTPRU                                          | 0.00142801        | 0.00142801           | 6.41813            | 6.41813                      | T up vs N                              | 14.79   | 32.3727   | 35.0214    | 1         |
| cg03895540  | ORS2N2                                                     | 0.00710818        | 0.00710818           | 0.28019            | -3.569                       | T down vs N                            | 9.5136  | 15.1611   | 25.4981    | 1         |
| cg03895857  | GABRB3;GABRB3                                              | 8.88E-05          | 8.88E-05             | 3.74071            | 3.74071                      | T up vs N                              | 26.971  | 16.3017   | 9.67063    | 1         |
| cg03895880  | SLCO1B3                                                    | 5.68E-05          | 5.68E-05             | 0.185519           | -5.3903                      | T down vs N                            | 29.367  | 26.58     | 14.4816    | 1         |
| cg03898365  | OR10A4                                                     | 1.46E-05          | 1.46E-05             | 0.279862           | -3.57319                     | T down vs N                            | 37.546  | 15.1891   | 6.4727     | 1         |
| cg03899322  | ANKS1A                                                     | 1.18E-05          | 1.18E-05             | 0.313744           | -3.18731                     | T down vs N                            | 38.932  | 12.5853   | 5.17219    | 1         |
| cg03900072  | DEFB124                                                    | 1.32E-05          | 1.32E-05             | 0.205824           | -4.85853                     | T down vs N                            | 38.194  | 23.4035   | 9.80397    | 1         |
| cg03905867  | PAX6;PAX6;PAX6                                             | 2.98E-06          | 2.98E-06             | 18.9992            | 18.9992                      | T up vs N                              | 49.039  | 81.1996   | 26.4932    | 1         |
| cg03908908  | MYO7A;MYO7A;MYO7A                                          | 3.53E-05          | 3.53E-05             | 3.20873            | 3.20873                      | T up vs N                              | 32.062  | 12.7311   | 6.35323    | 1         |
| cg03909356  | SEPT9;SEPT9;SEPT9                                          | 1.19E-05          | 1.19E-05             | 0.191023           | -5.23498                     | T down vs N                            | 38.905  | 25.6654   | 10.5551    | 1         |
| cg03909471  | C10orf57                                                   | 0.00017463        | 0.000174634          | 0.261914           | -3.81804                     | T down vs N                            | 23.596  | 16.8113   | 11.3997    | 1         |
| cg03910363  | IGSF9B                                                     | 0.00298782        | 0.00298782           | 0.28489            | -3.51012                     | T down vs N                            | 12.223  | 14.7673   | 19.3305    | 1         |
| cg03916038  | C3orf21                                                    | 5.55E-05          | 5.55E-05             | 0.130477           | -7.66421                     | T down vs N                            | 29.496  | 38.8469   | 21.0722    | 1         |
| cg03922834  | OTOP1                                                      | 0.0003015         | 0.000301501          | 0.290453           | -3.4429                      | T down vs N                            | 21.074  | 14.3159   | 10.8689    | 1         |
| cg03923813  | BAALC;BAALC                                                | 4.42E-05          | 4.42E-05             | 0.228261           | -4.38094                     | T down vs N                            | 30.764  | 20.4398   | 10.6304    | 1         |
| cg03924551  | ATP10A                                                     | 0.00122633        | 0.00122633           | 0.324249           | -3.08405                     | T down vs N                            | 15.351  | 11.8803   | 12.3826    | 1         |
| cg03924566  | BAI1;BAI1                                                  | 7.60E-05          | 7.60E-05             | 3.94648            | 3.94648                      | T up vs N                              | 27.789  | 17.6519   | 10.1633    | 1         |
| cg03926751  | KLHL8                                                      | 3.12E-07          | 3.12E-07             | 0.243992           | -4.09849                     | T down vs N                            | 69.888  | 18.6372   | 4.26678    | 1         |
| cg03927133  | ITPKA                                                      | 1.65E-05          | 1.65E-05             | 6.63469            | 6.63469                      | T up vs N                              | 36.731  | 33.5388   | 14.6094    | 1         |
| cg03928384  | CCR2;CCR2                                                  | 4.96E-05          | 4.96E-05             | 0.292781           | -3.41553                     | T down vs N                            | 30.114  | 14.1316   | 7.50833    | 1         |
| cg03928812  | TCN1                                                       | 0.00012111        | 0.000121113          | 0.127268           | -7.85742                     | T down vs N                            | 25.386  | 39.8025   | 25.0863    | 1         |
| cg03928961  | PIGZ                                                       | 9.23E-06          | 9.23E-06             | 5.45364            | 5.45364                      | T up vs N                              | 40.622  | 26.95     | 10.615     | 1         |
| cg03930153  | TBL1XR1                                                    | 7.06E-06          | 7.06E-06             | 0.279978           | -3.5717                      | T down vs N                            | 42.51   | 15.1792   | 5.7132     | 1         |
| cg03932978  | HMGCLL1;HMGCLL1                                            | 0.00165578        | 0.00165578           | 3.242              | 3.242                        | T up vs N                              | 14.255  | 12.9573   | 14.5432    | 1         |
| cg03934478  | RNH1;RNH1;RNH1;RNH1;RNH1;RNH1;RNH1                         | 0.00022286        | 0.000222859          | 3.04289            | 3.04289                      | T up vs N                              | 22.448  | 11.5985   | 8.26695    | 1         |
| cg03935116  | FAM60A;FAM60A;FLJ13224;FAM60A                              | 4.88E-06          | 4.88E-06             | 0.161464           | -6.19331                     | T down vs N                            | 45.226  | 31.1429   | 11.0178    | 1         |
| cg03936104  | C10orf41;C10orf41                                          | 7.44E-05          | 7.44E-05             | 8.689              | 8.689                        | T up vs N                              | 27.903  | 43.7821   | 25.1055    | 1         |
| cg03938043  | INTS7;DTL                                                  | 1.39E-05          | 1.39E-05             | 0.261005           | -3.83135                     | T down vs N                            | 37.866  | 16.8987   | 7.14037    | 1         |
| cg03938525  | RASGRF1;RASGRF1;RASGRF1                                    | 1.72E-05          | 1.72E-05             | 0.244701           | -4.08662                     | T down vs N                            | 36.464  | 18.5607   | 8.14429    | 1         |
| cg03940047  | EEF1A2                                                     | 1.96E-05          | 1.96E-05             | 3.83233            | 3.83233                      | T up vs N                              | 35.652  | 16.9052   | 7.58678    | 1         |
| cg03940407  | ELF2                                                       | 0.00023556        | 0.00023556           | 0.32135            | -3.11187                     | T down vs N                            | 22.192  | 12.0705   | 8.70258    | 1         |
| cg03940437  | CCDC21                                                     | 0.00148323        | 0.00148323           | 4.45321            | 4.45321                      | T up vs N                              | 14.652  | 20.8951   | 22.8177    | 1         |
| cg03942051  | TBX15                                                      | 0.00013359        | 0.000133589          | 0.306755           | -3.25993                     | T down vs N                            | 24.898  | 13.0792   | 8.40495    | 1         |
| cg03942855  | GSTM2;GSTM2                                                | 2.78E-05          | 2.78E-05             | 0.306917           | -3.25821                     | T down vs N                            | 33.477  | 13.0675   | 6.2455     | 1         |
| cg03943115  | SPRR2D                                                     | 7.41E-06          | 7.41E-06             | 0.203568           | -4.91236                     | T down vs N                            | 42.166  | 23.7309   | 9.00468    | 1         |
| cg03949820  | STX11                                                      | 0.00055166        | 0.000551661          | 0.328459           | -3.04452                     | T down vs N                            | 18.483  | 11.6097   | 10.0503    | 1         |
| cg03950354  | FCGR1C                                                     | 2.17E-05          | 2.17E-05             | 0.312274           | -3.20232                     | T down vs N                            | 35.018  | 12.6874   | 5.79707    | 1         |
| cg03954861  | TAPBP1;LOC678655;TAPBP1<br>LOC100132215;EHBP1;EHBP1;EHBP1; | 4.06E-05          | 4.06E-05             | 0.3213             | -3.11236                     | T down vs N                            | 31.255  | 12.0738   | 6.18081    | 1         |
| cg03955927  | EHBP1                                                      | 2.63E-05          | 2.63E-05             | 3.11107            | 3.11107                      | T up vs N                              | 33.833  | 12.065    | 5.70575    | 1         |
| cg03956426  | MEIS3P1                                                    | 0.00083664        | 0.000836636          | 0.332882           | -3.00406                     | T down vs N                            | 16.81   | 11.3323   | 10.7865    | 1         |
| cg03957898  | FLG2                                                       | 0.00366577        | 0.00366577           | 0.274263           | -3.64614                     | T down vs N                            | 11.555  | 15.675    | 21.7048    | 1         |

| Probeset ID                    | UCSC_REFGENE_NAME           | p-value<br>(Type) | p-value (T vs.<br>N) | Ratio (T<br>vs. N) | Fold-<br>Change (T<br>vs. N) | Fold-Change (T vs.<br>N) (Description) | F(Type) | SS (Type) | SS (Error) | F (Error) |
|--------------------------------|-----------------------------|-------------------|----------------------|--------------------|------------------------------|----------------------------------------|---------|-----------|------------|-----------|
| cg03958038                     | C10orf41;C10orf41           | 2.54E-05          | 2.54E-05             | 15.4726            | 15.4726                      | T up vs N                              | 34.037  | 70.2696   | 33.0323    | 1         |
| cg03958979                     | NR2E1                       | 4.20E-05          | 4.20E-05             | 3.93384            | 3.93384                      | T up vs N                              | 31.066  | 17.5695   | 9.049      | 1         |
| cg03960217                     | LCE2C;LCE2C                 | 8.06E-05          | 8.06E-05             | 0.30426            | -3.28666                     | T down vs N                            | 27.481  | 13.2606   | 7.72046    | 1         |
| cg03961332                     | GALNT9                      | 0.0002148         | 0.000214803          | 0.180387           | -5.54364                     | T down vs N                            | 22.619  | 27.4726   | 19.4334    | 1         |
| cg03961401                     | GNA12                       | 0.0014798         | 0.0014798            | 0.309529           | -3.23071                     | T down vs N                            | 14.66   | 12.8806   | 14.0577    | 1         |
| cg03961551                     | RUNX3;RUNX3                 | 2.71E-05          | 2.71E-05             | 0.203087           | -4.92401                     | T down vs N                            | 33.649  | 23.8015   | 11.3177    | 1         |
| cg03962691                     | NGF                         | 0.00122467        | 0.00122467           | 3.38798            | 3.38798                      | T up vs N                              | 15.356  | 13.946    | 14.5309    | 1         |
| TMEM176B;TMEM176B;TMEM176B;T   |                             |                   |                      |                    |                              |                                        |         |           |            |           |
| cg03964111                     | MEM176B;TMEM176A            | 0.0003887         | 0.000388697          | 3.42974            | 3.42974                      | T up vs N                              | 19.96   | 14.2273   | 11.4047    | 1         |
| cg03966685                     | CYP2W1                      | 0.00092221        | 0.000922214          | 0.176656           | -5.6607                      | T down vs N                            | 16.431  | 28.1471   | 27.4084    | 1         |
| cg03966785                     | PDGFRA                      | 0.00558043        | 0.00558043           | 0.299048           | -3.34395                     | T down vs N                            | 10.239  | 13.6485   | 21.3289    | 1         |
| cg03969260                     | SPRR2G                      | 3.51E-06          | 3.51E-06             | 0.165112           | -6.05649                     | T down vs N                            | 47.749  | 30.3845   | 10.1814    | 1         |
| cg03970483                     | C10orf28                    | 3.02E-05          | 3.02E-05             | 0.299116           | -3.34318                     | T down vs N                            | 32.984  | 13.6433   | 6.61814    | 1         |
| cg03971227                     | CFB                         | 3.87E-05          | 3.87E-05             | 0.236461           | -4.22903                     | T down vs N                            | 31.526  | 19.4749   | 9.88381    | 1         |
| cg03973705                     | PRKCB;PRKCB                 | 3.20E-06          | 3.20E-06             | 0.190998           | -5.23565                     | T down vs N                            | 48.482  | 25.6694   | 8.47147    | 1         |
| cg03978169                     | HLA-DPB2                    | 0.00060977        | 0.000609772          | 0.224886           | -4.44669                     | T down vs N                            | 18.072  | 20.8541   | 18.4632    | 1         |
| cg03981685                     | LOC339524                   | 2.70E-05          | 2.70E-05             | 0.264771           | -3.77685                     | T down vs N                            | 33.661  | 16.5402   | 7.86209    | 1         |
| cg03985459                     | ZFAND3                      | 7.19E-05          | 7.19E-05             | 0.325343           | -3.07367                     | T down vs N                            | 28.085  | 11.8093   | 6.72774    | 1         |
| cg03986578                     | BACH2;BACH2                 | 9.66E-05          | 9.66E-05             | 3.6874             | 3.6874                       | T up vs N                              | 26.534  | 15.9489   | 9.61705    | 1         |
| cg03988660                     | ASB14                       | 0.00035208        | 0.00035208           | 0.184126           | -5.43106                     | T down vs N                            | 20.39   | 26.8183   | 21.0446    | 1         |
| cg03988936                     | SLC35D3                     | 2.73E-05          | 2.73E-05             | 6.18492            | 6.18492                      | T up vs N                              | 33.607  | 31.0966   | 14.8048    | 1         |
| cg03989480                     | DMRTA2                      | 0.00135772        | 0.00135772           | 0.214102           | -4.67068                     | T down vs N                            | 14.975  | 22.2504   | 23.774     | 1         |
| cg03989567                     | LGALS8;LGALS8;LGALS8;LGALS8 | 0.00153717        | 0.00153717           | 0.284394           | -3.51625                     | T down vs N                            | 14.523  | 14.8083   | 16.3149    | 1         |
| cg03994820                     | CHL1                        | 0.00080275        | 0.000802746          | 3.21661            | 3.21661                      | T up vs N                              | 16.972  | 12.7847   | 12.0527    | 1         |
| cg03996735                     | H19                         | 1.91E-06          | 1.91E-06             | 3.7176             | 3.7176                       | T up vs N                              | 52.684  | 16.1489   | 4.90436    | 1         |
| cg04000821                     | LAIR2;LAIR2;LAIR2;LAIR2     | 4.55E-05          | 4.55E-05             | 0.313216           | -3.19268                     | T down vs N                            | 30.604  | 12.6218   | 6.5987     | 1         |
| cg04002454                     | SP140L;SP140L               | 1.35E-05          | 1.35E-05             | 0.211968           | -4.71769                     | T down vs N                            | 38.031  | 22.5405   | 9.48312    | 1         |
| cg04003850                     | FGF12;FGF12;FGF12           | 7.16E-06          | 7.16E-06             | 17.5497            | 17.5497                      | T up vs N                              | 42.409  | 76.8815   | 29.0054    | 1         |
| cg04004513                     | SKAP1;SKAP1                 | 1.22E-05          | 1.22E-05             | 0.288954           | -3.46076                     | T down vs N                            | 38.713  | 14.436    | 5.9664     | 1         |
| cg04005793                     | OBFC2B;SLC39A5              | 3.05E-05          | 3.05E-05             | 0.225225           | -4.44                        | T down vs N                            | 32.931  | 20.8121   | 10.1119    | 1         |
| cg04005943                     | CDH23;CDH23                 | 3.25E-05          | 3.25E-05             | 0.233694           | -4.2791                      | T down vs N                            | 32.563  | 19.7941   | 9.7261     | 1         |
| cg04005969                     | SHANK1                      | 6.66E-05          | 6.66E-05             | 5.86557            | 5.86557                      | T up vs N                              | 28.498  | 29.3134   | 16.4578    | 1         |
| cg04006061                     | GP5                         | 0.00036143        | 0.000361431          | 6.95667            | 6.95667                      | T up vs N                              | 20.275  | 35.2396   | 27.8089    | 1         |
| cg04006516                     | KRTAP20-2                   | 2.78E-08          | 2.78E-08             | 0.23172            | -4.31555                     | T down vs N                            | 99.813  | 20.0258   | 3.21013    | 1         |
| cg04007792                     | DLGAP2                      | 0.00155542        | 0.00155542           | 0.329601           | -3.03397                     | T down vs N                            | 14.48   | 11.5374   | 12.7486    | 1         |
| cg04011247                     | BCAT1;BCAT1                 | 3.76E-05          | 3.76E-05             | 0.176314           | -5.6717                      | T down vs N                            | 31.702  | 28.2101   | 14.2376    | 1         |
| cg04012857                     | TRIM31                      | 0.00398346        | 0.00398346           | 0.296771           | -3.3696                      | T down vs N                            | 11.289  | 13.8219   | 19.5903    | 1         |
| cg04016527                     | SRCIN1                      | 5.62E-05          | 5.62E-05             | 4.63037            | 4.63037                      | T up vs N                              | 29.42   | 22.0009   | 11.965     | 1         |
| PARVG;PARVG;PARVG;PARVG;PARVG; |                             |                   |                      |                    |                              |                                        |         |           |            |           |
| cg04017276                     | PARVG                       | 0.00085585        | 0.000855847          | 0.285536           | -3.50219                     | T down vs N                            | 16.721  | 14.7141   | 14.0796    | 1         |
| cg04020908                     | NAGLU                       | 0.00192057        | 0.00192057           | 0.330093           | -3.02945                     | T down vs N                            | 13.73   | 11.5064   | 13.4092    | 1         |
| cg04021098                     | OR10V1                      | 0.00320463        | 0.00320463           | 0.158116           | -6.32445                     | T down vs N                            | 11.992  | 31.8627   | 42.5115    | 1         |
| cg04021454                     | TAF12;TAF12                 | 0.00120148        | 0.00120148           | 0.313285           | -3.19198                     | T down vs N                            | 15.427  | 12.617    | 13.0855    | 1         |
| cg04022112                     | COL11A2;COL11A2;COL11A2     | 3.39E-05          | 3.39E-05             | 0.312109           | -3.20401                     | T down vs N                            | 32.3    | 12.699    | 6.2905     | 1         |
| cg04023717                     | CYP3A43;CYP3A43;CYP3A43     | 0.00570299        | 0.00570299           | 0.294199           | -3.39906                     | T down vs N                            | 10.173  | 14.0207   | 22.0528    | 1         |
| cg04024481                     | MCF2L;MCF2L                 | 1.69E-07          | 1.69E-07             | 0.219556           | -4.55464                     | T down vs N                            | 76.665  | 21.53     | 4.49333    | 1         |
| cg04025049                     | CHRM3                       | 0.0061301         | 0.0061301            | 0.240561           | -4.15695                     | T down vs N                            | 9.9542  | 19.0133   | 30.5612    | 1         |
| cg04025150                     | C1orf94;C1orf94;C1orf94     | 3.65E-05          | 3.65E-05             | 21.0686            | 21.0686                      | T up vs N                              | 31.873  | 87.0021   | 43.6747    | 1         |
| cg04025739                     | SIL1;SIL1                   | 0.00010585        | 0.000105848          | 0.296498           | -3.37271                     | T down vs N                            | 26.066  | 13.8429   | 8.49701    | 1         |
| cg04026948                     | PGCP                        | 0.0001102         | 0.000110203          | 0.234406           | -4.26609                     | T down vs N                            | 25.862  | 19.7113   | 12.195     | 1         |
| cg04027548                     | KCNJ8                       | 0.00125362        | 0.00125362           | 3.87523            | 3.87523                      | T up vs N                              | 15.269  | 17.1865   | 18.0092    | 1         |
| cg04027736                     | HOXA2                       | 0.0014315         | 0.0014315            | 4.03336            | 4.03336                      | T up vs N                              | 14.781  | 18.2163   | 19.7186    | 1         |
| cg04029159                     | SIGIRR;SIGIRR;SIGIRR        | 8.13E-06          | 8.13E-06             | 0.251096           | -3.98255                     | T down vs N                            | 41.506  | 17.8866   | 6.895      | 1         |
| cg04031361                     | EDARADD;EDARADD             | 0.00030033        | 0.000300331          | 0.305199           | -3.27655                     | T down vs N                            | 21.837  | 12.416    | 8.5288     | 1         |
| cg04035233                     | RAB40A                      | 5.93E-05          | 5.93E-05             | 0.290113           | -3.44694                     | T down vs N                            | 29.126  | 14.3431   | 7.8793     | 1         |
| cg04035728                     | CHRNA2                      | 0.00042401        | 0.000424005          | 0.292183           | -3.42251                     | T down vs N                            | 19.587  | 14.1787   | 11.5822    | 1         |
| cg04039799                     | NAV2;NAV2;NAV2              | 0.00174968        | 0.00174968           | 0.262289           | -3.81259                     | T down vs N                            | 14.059  | 16.7754   | 19.092     | 1         |
| cg04041827                     | KRTAP2-2                    | 0.00600052        | 0.00600052           | 0.32298            | -3.09616                     | T down vs N                            | 10.019  | 11.9631   | 19.1055    | 1         |
| cg04041960                     | RGS10                       | 4.96E-06          | 4.96E-06             | 9.5373             | 9.5373                       | T up vs N                              | 45.1    | 47.6361   | 16.8998    | 1         |
| cg04041976                     | TRIM55;TRIM55;TRIM55;TRIM55 | 0.00404753        | 0.00404753           | 0.230593           | -4.33664                     | T down vs N                            | 11.238  | 20.1596   | 28.702     | 1         |
| cg04043623                     | AHCY;AHCY                   | 0.00011251        | 0.00011251           | 0.25821            | -3.87282                     | T down vs N                            | 25.757  | 17.1707   | 10.6664    | 1         |
| cg04044206                     | ZNF252;C8orf77              | 2.97E-06          | 2.97E-06             | 0.290949           | -3.43703                     | T down vs N                            | 49.064  | 14.2764   | 4.65566    | 1         |
| cg04044664                     | ANKRD43                     | 3.24E-05          | 3.24E-05             | 8.41006            | 8.41006                      | T up vs N                              | 32.579  | 42.4706   | 20.8578    | 1         |
| cg04046931                     | FLJ43860                    | 0.00222252        | 0.00222252           | 0.250921           | -3.98532                     | T down vs N                            | 13.222  | 17.9047   | 21.6665    | 1         |
| cg04047472                     | CRAMP1L                     | 1.28E-05          | 1.28E-05             | 0.275459           | -3.63031                     | T down vs N                            | 38.41   | 15.5698   | 6.4857     | 1         |
| cg04052466                     | AMH                         | 1.07E-05          | 1.07E-05             | 12.2874            | 12.2874                      | T up vs N                              | 39.635  | 58.9408   | 23.7935    | 1         |
| cg04053108                     | VWF                         | 2.56E-05          | 2.56E-05             | 4.45544            | 4.45544                      | T up vs N                              | 33.985  | 20.9091   | 9.84405    | 1         |
| cg04057642                     | KPNB1                       | 1.22E-05          | 1.22E-05             | 0.189986           | -5.26354                     | T down vs N                            | 38.724  | 25.8344   | 10.6743    | 1         |
| cg04058498                     | ORS6A4                      | 1.59E-05          | 1.59E-05             | 0.275477           | -3.63006                     | T down vs N                            | 36.982  | 15.5681   | 6.73545    | 1         |
| cg04059568                     | PTPRN2;PTPRN2;PTPRN2        | 2.63E-05          | 2.63E-05             | 10.6149            | 10.6149                      | T up vs N                              | 33.812  | 52.2658   | 24.7324    | 1         |
| cg04060128                     | TGFB11;TGFB11;TGFB11        | 2.52E-05          | 2.52E-05             | 3.96004            | 3.96004                      | T up vs N                              | 34.082  | 17.7402   | 8.3282     | 1         |

| Probeset ID                    | UCSC_REFGENE_NAME       | p-value<br>(Type) | p-value (T vs.<br>N) | Ratio (T<br>vs. N) | Fold-<br>Change (T<br>vs. N) | Fold-Change (T vs.<br>N) (Description) | F(Type) | SS (Type) | SS (Error) | F (Error) |
|--------------------------------|-------------------------|-------------------|----------------------|--------------------|------------------------------|----------------------------------------|---------|-----------|------------|-----------|
| ECHDC1;ECHDC1;ECHDC1;ECHDC1;EC |                         |                   |                      |                    |                              |                                        |         |           |            |           |
| cg04060561                     | HDC1                    | 6.76E-06          | 6.76E-06             | 0.221647           | -4.51168                     | T down vs N                            | 42.828  | 21.2617   | 7.94305    | 1         |
| cg04064672                     | MAGEC2                  | 8.40E-05          | 8.40E-05             | 0.260478           | -3.8391                      | T down vs N                            | 27.258  | 16.9496   | 9.94905    | 1         |
| cg04071948                     | ZNF672                  | 6.96E-06          | 6.96E-06             | 0.213412           | -4.68577                     | T down vs N                            | 42.609  | 22.3437   | 8.39015    | 1         |
| cg04074004                     | DDAH2                   | 0.00278449        | 0.00278449           | 3.53226            | 3.53226                      | T up vs N                              | 12.457  | 14.9155   | 19.1571    | 1         |
| cg04074157                     | SPDYE6                  | 0.00011372        | 0.000113717          | 0.313921           | -3.18551                     | T down vs N                            | 25.703  | 12.573    | 7.82672    | 1         |
| cg04074536                     | CPLX1                   | 0.00100829        | 0.00100829           | 4.25134            | 4.25134                      | T up vs N                              | 16.089  | 19.6173   | 19.5091    | 1         |
| cg04075230                     | MGC72080                | 3.18E-06          | 3.18E-06             | 0.270968           | -3.69047                     | T down vs N                            | 48.522  | 15.9692   | 5.26576    | 1         |
| cg04078118                     | TNRC6B                  | 0.00490172        | 0.00490172           | 0.266994           | -3.7454                      | T down vs N                            | 10.637  | 16.3327   | 24.5676    | 1         |
| cg04079760                     | ESRP2                   | 9.69E-06          | 9.69E-06             | 11.2607            | 11.2607                      | T up vs N                              | 40.287  | 54.9119   | 21.8085    | 1         |
| cg04080282                     | PON3                    | 6.25E-05          | 6.25E-05             | 3.22877            | 3.22877                      | T up vs N                              | 28.845  | 12.8674   | 7.13736    | 1         |
| cg04084348                     | PLAU;C10orf55;PLAU      | 3.64E-06          | 3.64E-06             | 0.313871           | -3.18602                     | T down vs N                            | 47.459  | 12.5765   | 4.23994    | 1         |
| cg04085571                     | LSP1                    | 3.54E-05          | 3.54E-05             | 0.299642           | -3.33732                     | T down vs N                            | 32.049  | 13.6037   | 6.79142    | 1         |
| cg04085768                     | ALPK1;ALPK1             | 0.00071232        | 0.000712321          | 3.67082            | 3.67082                      | T up vs N                              | 17.445  | 15.8389   | 14.5268    | 1         |
| cg04086012                     | TRIM1L                  | 3.36E-05          | 3.36E-05             | 0.324223           | -3.08429                     | T down vs N                            | 32.353  | 11.8819   | 5.87607    | 1         |
| cg04086531                     | ZNF423                  | 0.00013418        | 0.000134177          | 4.8634             | -4.8634                      | T down vs N                            | 24.876  | 23.4331   | 15.0717    | 1         |
| cg04089901                     | COL28A1                 | 0.00126753        | 0.00126753           | 0.255749           | -3.91008                     | T down vs N                            | 15.228  | 17.4144   | 18.297     | 1         |
| cg04091702                     | MARVELD2;MARVELD2       | 3.42E-05          | 3.42E-05             | 3.0611             | 3.0611                       | T up vs N                              | 32.248  | 11.7232   | 5.81661    | 1         |
| cg04092800                     | PTGER4                  | 0.0066729         | 0.0066729            | 3.39185            | 3.39185                      | T up vs N                              | 9.7006  | 13.9721   | 23.0453    | 1         |
| cg04093349                     | SMAD6;SMAD6             | 4.04E-05          | 4.04E-05             | 4.04132            | 4.04132                      | T up vs N                              | 31.285  | 18.2679   | 9.3428     | 1         |
| cg04093885                     | ISCA1L                  | 0.00043642        | 0.000436422          | 0.265221           | -3.77044                     | T down vs N                            | 19.464  | 16.4979   | 13.5618    | 1         |
| cg04094641                     | SAG                     | 9.21E-05          | 9.21E-05             | 0.280126           | -3.56982                     | T down vs N                            | 26.779  | 15.1665   | 9.06178    | 1         |
| cg04096519                     | GPR44                   | 1.26E-05          | 1.26E-05             | 4.41502            | 4.41502                      | T up vs N                              | 38.518  | 20.6548   | 8.57991    | 1         |
| cg04100337                     | SDK2                    | 5.20E-05          | 5.20E-05             | 0.240884           | -4.15137                     | T down vs N                            | 29.858  | 18.9775   | 10.1694    | 1         |
| cg04103198                     | SIRPB1;SIRPB1;SIRPB1    | 0.00017357        | 0.000173565          | 0.264333           | -3.78311                     | T down vs N                            | 23.625  | 16.5814   | 11.2298    | 1         |
| cg04103317                     | SUGT1P1;SPINK4          | 1.23E-07          | 1.23E-07             | 0.259745           | -3.84993                     | T down vs N                            | 80.347  | 17.0207   | 3.38946    | 1         |
| EMR2;EMR2;EMR2;EMR2;EMR2;EMR   |                         |                   |                      |                    |                              |                                        |         |           |            |           |
| cg04103514                     | 2;EMR2                  | 0.0001385         | 0.000138499          | 0.257              | -3.89106                     | T down vs N                            | 24.72   | 17.2901   | 11.191     | 1         |
| cg04104526                     | NTRK1;INSRR             | 0.00263607        | 0.00263607           | 3.13103            | 3.13103                      | T up vs N                              | 12.641  | 12.2014   | 15.4434    | 1         |
| cg04108328                     | ESCO2                   | 0.00067245        | 0.000672448          | 0.243087           | -4.11375                     | T down vs N                            | 17.676  | 18.7355   | 16.9591    | 1         |
| cg04109898                     | HCG9                    | 2.66E-06          | 2.66E-06             | 32.3754            | 32.3754                      | T up vs N                              | 49.945  | 113.258   | 36.283     | 1         |
| cg04110105                     | CCR2;CCR2;CCR2;CCR2     | 1.49E-05          | 1.49E-05             | 0.248918           | -4.01738                     | T down vs N                            | 37.417  | 18.1128   | 7.74519    | 1         |
| cg04111761                     | CCR3;CCR3;CCR3;CCR3     | 1.04E-05          | 1.04E-05             | 0.171143           | -5.84306                     | T down vs N                            | 39.828  | 29.1861   | 11.7249    | 1         |
| cg04113200                     | STX2;STX2               | 0.00296043        | 0.00296043           | 5.99159            | 5.99159                      | T up vs N                              | 12.254  | 30.0221   | 39.2013    | 1         |
| cg04115702                     | HRBNP3                  | 0.004884          | 0.004884             | 0.255903           | -3.90773                     | T down vs N                            | 10.648  | 17.399    | 26.144     | 1         |
| cg04117029                     | BCCIP;BCCIP;UROS;BCCIP  | 2.88E-05          | 2.88E-05             | 0.287363           | -3.47992                     | T down vs N                            | 33.272  | 14.5647   | 7.00391    | 1         |
| cg04117801                     | HOXB3                   | 0.00065254        | 0.000652537          | 3.84279            | 3.84279                      | T up vs N                              | 17.797  | 16.9738   | 15.2598    | 1         |
| cg04118234                     | ZC3HAV1;ZC3HAV1         | 0.00049477        | 0.000494774          | 0.326528           | -3.06252                     | T down vs N                            | 18.935  | 11.7329   | 9.91446    | 1         |
| cg04119462                     | ABCA17P                 | 0.00055112        | 0.000551124          | 0.285492           | -3.50273                     | T down vs N                            | 18.487  | 14.7177   | 12.7381    | 1         |
| cg04119852                     | LAMP3                   | 0.00014661        | 0.000146611          | 0.274222           | -3.64668                     | T down vs N                            | 24.441  | 15.6786   | 10.2639    | 1         |
| cg04121731                     | ZNF267                  | 0.00162096        | 0.00162096           | 0.203649           | -4.91042                     | T down vs N                            | 14.331  | 23.7191   | 26.4807    | 1         |
| cg04121771                     | TM4SF4                  | 6.58E-05          | 6.58E-05             | 0.263689           | -3.79234                     | T down vs N                            | 28.564  | 16.6422   | 9.32204    | 1         |
| cg04123310                     | SYTL1                   | 0.00025549        | 0.000255486          | 7.74269            | 7.74269                      | T up vs N                              | 21.82   | 39.2365   | 28.7706    | 1         |
| cg04123357                     | COL18A1;COL18A1;COL18A1 | 0.00023314        | 0.000233139          | 0.295969           | -3.37874                     | T down vs N                            | 22.24   | 13.8836   | 9.98836    | 1         |
| cg04123765                     | OR2L1P;OR2L13           | 0.0024862         | 0.0024862            | 0.233364           | -4.28515                     | T down vs N                            | 12.839  | 19.8326   | 24.7156    | 1         |
| cg04125273                     | ZG16                    | 1.75E-06          | 1.75E-06             | 0.228991           | -4.36698                     | T down vs N                            | 53.434  | 20.3516   | 6.094      | 1         |
| cg04127044                     | PPYR1                   | 0.00211146        | 0.00211146           | 4.37673            | 4.37673                      | T up vs N                              | 13.399  | 20.4132   | 24.3756    | 1         |
| cg04130557                     | SORBS2                  | 0.00091402        | 0.000914024          | 0.3321             | -3.01114                     | T down vs N                            | 16.951  | 10.7114   | 9.47883    | 1         |
| cg04134048                     | TNFRSF10D               | 7.02E-05          | 7.02E-05             | 4.21324            | 4.21324                      | T up vs N                              | 28.215  | 19.374    | 10.9867    | 1         |
| cg04138181                     | PLK1                    | 0.00218996        | 0.00218996           | 0.058106           | -17.21                       | T down vs N                            | 15.774  | 51.8538   | 36.1605    | 1         |
| cg04138756                     | SPRR3;SPRR3             | 5.41E-05          | 5.41E-05             | 0.167568           | -5.96772                     | T down vs N                            | 29.634  | 29.8883   | 16.1372    | 1         |
| cg04141129                     | BICD1;BICD1             | 0.0001659         | 0.000165895          | 0.291233           | -3.43368                     | T down vs N                            | 23.842  | 14.2539   | 9.5657     | 1         |
| cg04141164                     | NTSR2                   | 0.00133357        | 0.00133357           | 3.08889            | 3.08889                      | T up vs N                              | 15.041  | 11.9134   | 12.6733    | 1         |
| cg04141217                     | OR5H1                   | 0.0001228         | 0.000122798          | 0.265286           | -3.76951                     | T down vs N                            | 25.317  | 16.4918   | 10.4227    | 1         |
| cg04141648                     | CTNNA3                  | 0.00139207        | 0.00139207           | 0.279981           | -3.57167                     | T down vs N                            | 14.883  | 15.1789   | 16.3181    | 1         |
| cg04142555                     | MAGEL2                  | 0.00090243        | 0.000902429          | 0.262041           | -3.8162                      | T down vs N                            | 16.515  | 16.7992   | 16.2752    | 1         |
| cg04142955                     | STK19;STK19;DOM3Z;STK19 | 0.00027532        | 0.000275324          | 0.266155           | -3.75721                     | T down vs N                            | 21.482  | 16.4107   | 12.2231    | 1         |
| cg04145539                     | LRRC2;TDGF1             | 2.88E-05          | 2.88E-05             | 4.73576            | 4.73576                      | T up vs N                              | 33.282  | 22.6518   | 10.8896    | 1         |
| cg04145601                     | MMP9                    | 0.00115393        | 0.00115393           | 0.31342            | -3.1906                      | T down vs N                            | 15.578  | 12.6077   | 12.9491    | 1         |
| cg04149916                     | STK19;STK19;DOM3Z;STK19 | 2.49E-06          | 2.49E-06             | 0.28008            | -3.57041                     | T down vs N                            | 50.507  | 15.1705   | 4.80583    | 1         |
| cg04150276                     | GNPNAT1                 | 0.00048566        | 0.000485664          | 0.255146           | -3.91932                     | T down vs N                            | 19.013  | 17.4748   | 14.7059    | 1         |
| cg04151012                     | ZNF512                  | 0.00039938        | 0.00039938           | 0.216027           | -4.62906                     | T down vs N                            | 21.316  | 19.5491   | 12.8394    | 1         |
| cg04151220                     | TRIM31                  | 0.00588885        | 0.00588885           | 0.288427           | -3.46708                     | T down vs N                            | 10.075  | 14.4785   | 22.9924    | 1         |
| cg04155280                     | SEBOX;SEBOX             | 0.00290468        | 0.00290468           | 0.283769           | -3.52399                     | T down vs N                            | 12.317  | 14.8601   | 19.3042    | 1         |
| cg04156293                     | ACHE;ACHE               | 6.30E-06          | 6.30E-06             | 18.7515            | 18.7515                      | T up vs N                              | 43.333  | 80.4776   | 29.7149    | 1         |
| cg04156900                     | CCL24                   | 0.00018836        | 0.000188356          | 0.261169           | -3.82894                     | T down vs N                            | 23.236  | 16.8829   | 11.6255    | 1         |
| cg04157161                     | GUCY2D                  | 2.07E-05          | 2.07E-05             | 13.43              | 13.43                        | T up vs N                              | 35.301  | 63.193    | 28.6423    | 1         |
| cg04158018                     | NFE2                    | 3.30E-05          | 3.30E-05             | 0.229107           | -4.36476                     | T down vs N                            | 32.471  | 20.3376   | 10.0212    | 1         |
| cg04159215                     | LHPP;LHPP               | 4.96E-06          | 4.96E-06             | 0.328778           | -3.04157                     | T down vs N                            | 45.099  | 11.5894   | 4.11161    | 1         |
| cg04160030                     | FUCA1                   | 0.00167516        | 0.00167516           | 0.112637           | -8.87809                     | T down vs N                            | 14.214  | 44.6583   | 50.2709    | 1         |
| cg04160046                     | LOC100129935            | 0.00107938        | 0.00107938           | 0.293722           | -3.40458                     | T down vs N                            | 15.83   | 14.0579   | 14.209     | 1         |
| cg04161236                     | HBBP1                   | 4.14E-05          | 4.14E-05             | 0.194852           | -5.13211                     | T down vs N                            | 31.14   | 25.0537   | 12.8727    | 1         |

| Probeset ID | UCSC_REFGENE_NAME             | p-value<br>(Type) | p-value (T vs.<br>N) | Ratio (T<br>vs. N) | Fold-<br>Change (T<br>vs. N) | Fold-Change (T vs.<br>N) (Description) | F(Type) | SS (Type) | SS (Error) | F (Error) |
|-------------|-------------------------------|-------------------|----------------------|--------------------|------------------------------|----------------------------------------|---------|-----------|------------|-----------|
| cg04161784  | HBXIP                         | 2.27E-06          | 2.27E-06             | 0.173258           | -5.77174                     | T down vs N                            | 51.251  | 28.7814   | 8.98518    | 1         |
| cg04162032  | LOC646627;LOC646627           | 0.00024252        | 0.000242522          | 0.223472           | -4.47483                     | T down vs N                            | 22.058  | 21.0308   | 15.2548    | 1         |
| cg04162276  | HP;HP                         | 1.62E-08          | 1.62E-08             | 0.239035           | -4.18349                     | T down vs N                            | 107.81  | 19.1836   | 2.84695    | 1         |
| cg04163147  | OR52B4;OR52B4                 | 0.00398873        | 0.00398873           | 0.252163           | -3.96569                     | T down vs N                            | 11.285  | 17.777    | 25.2054    | 1         |
| cg04163638  | FAM49A                        | 0.0008303         | 0.000830302          | 0.316446           | -3.1601                      | T down vs N                            | 16.839  | 12.3997   | 11.7817    | 1         |
| cg04166618  | LOC643387;LOC151174;LOC151174 | 0.00045026        | 0.000450263          | 3.07761            | 3.07761                      | T up vs N                              | 19.332  | 11.8362   | 9.79641    | 1         |
| cg04168137  | POU6F2;POU6F2;POU6F2;POU6F2   | 0.00048749        | 0.000487486          | 0.316691           | -3.15766                     | T down vs N                            | 18.997  | 12.3831   | 10.4296    | 1         |
| cg04173182  | LNX1                          | 3.75E-06          | 3.75E-06             | 0.234567           | -4.26317                     | T down vs N                            | 50.118  | 18.5343   | 5.54721    | 1         |
| cg04173714  | AKAP13;AKAP13                 | 0.00083987        | 0.000839873          | 0.138409           | -7.22497                     | T down vs N                            | 17.296  | 34.4734   | 29.8965    | 1         |
| cg04174658  | OR4C15                        | 7.50E-06          | 7.50E-06             | 0.191137           | -5.23184                     | T down vs N                            | 42.082  | 25.6468   | 9.7512     | 1         |
| cg04175877  | ERBB2IP;ERBB2IP               | 1.10E-05          | 1.10E-05             | 0.184865           | -5.40934                     | T down vs N                            | 39.408  | 26.6915   | 10.8369    | 1         |
| cg04176169  | TRIM31                        | 3.49E-05          | 3.49E-05             | 0.207354           | -4.82267                     | T down vs N                            | 32.13   | 23.1846   | 11.5453    | 1         |
| cg04176246  | MSI2;MSI2                     | 1.77E-05          | 1.77E-05             | 0.246486           | -4.05703                     | T down vs N                            | 36.279  | 18.3695   | 8.10151    | 1         |
| cg04176995  | MRPS18B;PPP1R10               | 0.00031766        | 0.000317655          | 0.311817           | -3.207                       | T down vs N                            | 20.842  | 12.7193   | 9.76423    | 1         |
| cg04184297  | SLC16A3;SLC16A3               | 3.06E-05          | 3.06E-05             | 4.19635            | 4.19635                      | T up vs N                              | 32.918  | 19.2659   | 9.36422    | 1         |
| cg04186471  | TKTL1;TEX28;TKTL1             | 0.0007311         | 0.000731102          | 0.221671           | -4.51118                     | T down vs N                            | 17.341  | 21.2586   | 19.6141    | 1         |
| cg04186657  | HLA-F;HLA-F;HLA-F             | 3.46E-05          | 3.46E-05             | 0.127259           | -7.858                       | T down vs N                            | 32.19   | 39.8054   | 19.785     | 1         |
| cg04187939  | AFF3;AFF3                     | 0.00372284        | 0.00372284           | 4.08911            | 4.08911                      | T up vs N                              | 11.764  | 17.484    | 22.294     | 1         |
| cg04188920  | PFKP                          | 7.13E-05          | 7.13E-05             | 0.146713           | -6.81605                     | T down vs N                            | 28.132  | 34.5015   | 19.6229    | 1         |
| cg04191236  | UTS2R                         | 3.70E-06          | 3.70E-06             | 0.154096           | -6.48945                     | T down vs N                            | 47.328  | 32.7588   | 11.0746    | 1         |
| cg04193160  | OBSCN;OBSCN                   | 0.00207374        | 0.00207374           | 3.68818            | 3.68818                      | T up vs N                              | 13.462  | 15.9541   | 18.9624    | 1         |
| cg04193820  | RNF135;RNF135                 | 0.00022083        | 0.000220826          | 6.08754            | 6.08754                      | T up vs N                              | 22.49   | 30.5573   | 21.7389    | 1         |
| cg04195226  | PIGL                          | 5.33E-05          | 5.33E-05             | 0.197625           | -5.06009                     | T down vs N                            | 29.72   | 24.6226   | 13.2559    | 1         |
| cg04196933  | AACSL                         | 0.00109639        | 0.00109639           | 4.62935            | 4.62935                      | T up vs N                              | 15.771  | 21.9946   | 22.3144    | 1         |
| cg04197548  | DNAJC9                        | 0.00193331        | 0.00193331           | 0.295252           | -3.38694                     | T down vs N                            | 13.706  | 13.9389   | 16.2714    | 1         |
| cg04198912  | MFS4                          | 0.00201145        | 0.00201145           | 0.236349           | -4.23104                     | T down vs N                            | 13.568  | 19.4877   | 22.9811    | 1         |
| cg04198914  | HNF1B;HNF1B                   | 9.49E-08          | 9.49E-08             | 0.254796           | -3.9247                      | T down vs N                            | 83.49   | 17.5099   | 3.35558    | 1         |
| cg04200704  | SNORD115-39                   | 0.00134337        | 0.00134337           | 0.316404           | -3.16052                     | T down vs N                            | 15.014  | 12.4026   | 13.2173    | 1         |
| cg04201347  | PRRG2                         | 0.00012126        | 0.000121264          | 0.330537           | -3.02538                     | T down vs N                            | 25.38   | 11.4785   | 7.23635    | 1         |
| cg04203950  | SPNS2;MYBBP1A;MYBBP1A         | 0.00066954        | 0.000669535          | 3.71142            | 3.71142                      | T up vs N                              | 17.693  | 16.108    | 14.5663    | 1         |
| cg04204246  | LAMA4;LAMA4;LAMA4             | 1.97E-05          | 1.97E-05             | 0.330892           | -3.02213                     | T down vs N                            | 35.597  | 11.4562   | 5.14936    | 1         |
| cg04205041  | SYTL3                         | 8.92E-06          | 8.92E-06             | 0.270323           | -3.69927                     | T down vs N                            | 40.861  | 16.0276   | 6.27598    | 1         |
| cg04207084  | PTPRN2;PTPRN2;PTPRN2          | 2.48E-05          | 2.48E-05             | 6.66372            | 6.66372                      | T up vs N                              | 34.172  | 33.6937   | 15.7763    | 1         |
| cg04207385  | CNR1;CNR1;CNR1;CNR1           | 0.00181407        | 0.00181407           | 6.94311            | 6.94311                      | T up vs N                              | 13.931  | 35.1688   | 40.3933    | 1         |
| cg04208124  | AHNAK                         | 0.00061615        | 0.000616151          | 3.55767            | 3.55767                      | T up vs N                              | 18.03   | 15.0854   | 13.3873    | 1         |
| cg04209727  | KLHL14                        | 0.00045466        | 0.000454657          | 8.9051             | 8.9051                       | T up vs N                              | 19.29   | 44.7826   | 37.144     | 1         |
| cg04209913  | GDNF;GDNF;GDNF                | 0.00297736        | 0.00297736           | 5.69986            | 5.69986                      | T up vs N                              | 12.235  | 28.3714   | 37.1032    | 1         |
| cg04211790  | LRTM1;CACNA2D3                | 6.88E-06          | 6.88E-06             | 0.317456           | -3.15005                     | T down vs N                            | 42.693  | 12.3312   | 4.62133    | 1         |
| cg04211937  | PLEKHA7                       | 0.00131472        | 0.00131472           | 0.332775           | -3.00503                     | T down vs N                            | 15.093  | 11.339    | 12.0203    | 1         |
| cg04212239  | SMC4;SMC4                     | 8.50E-06          | 8.50E-06             | 0.223276           | -4.47876                     | T down vs N                            | 41.194  | 21.0555   | 8.17808    | 1         |
| cg04214573  | ACSL5;ACSL5;ACSL5             | 1.88E-05          | 1.88E-05             | 0.279078           | -3.58323                     | T down vs N                            | 35.893  | 15.2561   | 6.80072    | 1         |
| cg04215126  | FLJ23834                      | 2.43E-05          | 2.43E-05             | 0.292618           | -3.41742                     | T down vs N                            | 34.318  | 14.1444   | 6.5946     | 1         |
| cg04215287  | WWTR1;WWTR1;WWTR1             | 3.51E-07          | 3.51E-07             | 0.15644            | -6.39223                     | T down vs N                            | 68.639  | 32.2321   | 7.51345    | 1         |
| cg04217082  | EIF4EBP1                      | 0.00015782        | 0.000157815          | 0.182902           | -5.46742                     | T down vs N                            | 24.083  | 27.0302   | 17.9583    | 1         |
| cg04218345  | FGF12                         | 2.30E-06          | 2.30E-06             | 13.195             | 13.195                       | T up vs N                              | 51.14   | 62.3369   | 19.503     | 1         |
| cg04218899  | LAMC2;LAMC2;LAMC2;LAMC2       | 0.00159115        | 0.00159115           | 7.15588            | 7.15588                      | T up vs N                              | 14.398  | 36.273    | 40.3086    | 1         |
| cg04219544  | KRT24                         | 4.89E-07          | 4.89E-07             | 0.158646           | -6.30334                     | T down vs N                            | 65.25   | 31.7473   | 7.78476    | 1         |
| cg04221650  | LCE4A;LCE4A                   | 0.00136046        | 0.00136046           | 0.189103           | -5.28811                     | T down vs N                            | 14.967  | 25.9795   | 27.7721    | 1         |
| cg04221910  | CEP72                         | 0.0001805         | 0.000180496          | 0.256313           | -3.90148                     | T down vs N                            | 23.438  | 17.3582   | 11.8496    | 1         |
| cg04225197  | APOF                          | 0.00167163        | 0.00167163           | 0.31579            | -3.16666                     | T down vs N                            | 14.221  | 12.4445   | 14.0011    | 1         |
| cg04225902  | SUB1                          | 1.45E-05          | 1.45E-05             | 3.23017            | 3.23017                      | T up vs N                              | 37.564  | 12.8769   | 5.48485    | 1         |
| cg04226276  | FAM43A                        | 0.00020434        | 0.000204336          | 0.283659           | -3.52536                     | T down vs N                            | 22.852  | 14.8693   | 10.4108    | 1         |
| cg04226366  | DIDO1;DIDO1;DIDO1             | 0.001234          | 0.001234             | 3.07843            | 3.07843                      | T up vs N                              | 15.328  | 11.8419   | 12.3613    | 1         |
| cg04227871  | RIMBP2                        | 0.00074497        | 0.00074497           | 0.256488           | -3.89881                     | T down vs N                            | 17.267  | 17.3408   | 16.0686    | 1         |
| cg04228935  | RUNX1                         | 0.00184199        | 0.00184199           | 5.98727            | 5.98727                      | T up vs N                              | 13.877  | 29.9979   | 34.5882    | 1         |
| cg04231019  | UMOD;UMOD                     | 1.43E-05          | 1.43E-05             | 0.333121           | -3.00192                     | T down vs N                            | 37.674  | 11.3176   | 4.80657    | 1         |
| cg04231050  | BFSP2                         | 2.74E-06          | 2.74E-06             | 3.67903            | 3.67903                      | T up vs N                              | 49.72   | 15.8934   | 5.11452    | 1         |
| cg04232615  | CETP                          | 0.00050584        | 0.000505844          | 3.73608            | 3.73608                      | T up vs N                              | 18.842  | 16.2711   | 13.8167    | 1         |
| cg04234574  | KCNMB3;KCNMB3                 | 2.04E-05          | 2.04E-05             | 0.327887           | -3.04983                     | T down vs N                            | 35.401  | 11.6461   | 5.26366    | 1         |
| cg04235075  | HSF4;HSF4                     | 0.00026094        | 0.00026094           | 4.32395            | 4.32395                      | T up vs N                              | 21.724  | 20.0791   | 14.7883    | 1         |
| cg04237529  | OR6K2                         | 2.51E-05          | 2.51E-05             | 0.268289           | -3.72732                     | T down vs N                            | 34.097  | 16.2132   | 7.60813    | 1         |
| cg04238758  | RDH10                         | 7.32E-06          | 7.32E-06             | 0.235666           | -4.2433                      | T down vs N                            | 42.254  | 19.566    | 7.40885    | 1         |
| cg04239786  | FGF10                         | 0.00028779        | 0.000287794          | 0.326898           | -3.05906                     | T down vs N                            | 21.282  | 11.7093   | 8.80301    | 1         |
| cg04239994  | HRNBP3                        | 0.00061169        | 0.000611692          | 11.4535            | 11.4535                      | T up vs N                              | 18.059  | 55.6846   | 49.3352    | 1         |
| cg04242655  | PRAME;PRAME;LOC648691;PRAME;P | 0.00024365        | 0.000243649          | 0.301962           | -3.31168                     | T down vs N                            | 22.037  | 13.4301   | 9.75096    | 1         |
| cg04243901  | DHX37                         | 5.84E-05          | 5.84E-05             | 0.105737           | -9.45742                     | T down vs N                            | 29.211  | 47.2814   | 25.8981    | 1         |
| cg04244170  | TOMM70A                       | 0.00070119        | 0.000701188          | 0.225435           | -4.43588                     | T down vs N                            | 17.508  | 20.7861   | 18.9957    | 1         |
| cg04244985  | KIR3DX1                       | 0.00016065        | 0.000160651          | 0.143888           | -6.94987                     | T down vs N                            | 23.997  | 35.2041   | 23.4728    | 1         |
| cg04245402  | C19orf21                      | 5.37E-06          | 5.37E-06             | 0.157882           | -6.33383                     | T down vs N                            | 44.501  | 31.9139   | 11.4743    | 1         |
| cg04245540  | IL31RA                        | 5.64E-06          | 5.64E-06             | 0.173929           | -5.74946                     | T down vs N                            | 44.147  | 28.6546   | 10.3852    | 1         |

| Probeset ID                         | UCSC_REFGENE_NAME             | p-value<br>(Type) | p-value (T vs.<br>N) | Ratio (T<br>vs. N) | Fold-<br>Change (T<br>vs. N) | Fold-Change (T vs.<br>N) (Description) | F(Type) | SS (Type) | SS (Error) | F (Error) |
|-------------------------------------|-------------------------------|-------------------|----------------------|--------------------|------------------------------|----------------------------------------|---------|-----------|------------|-----------|
| cg04246123                          | HCG4P6                        | 4.10E-05          | 4.10E-05             | 0.272159           | -3.67433                     | T down vs N                            | 31.193  | 15.8622   | 8.13636    | 1         |
| cg04246763                          | LOC339524                     | 2.78E-05          | 2.78E-05             | 7.29269            | 7.29269                      | T up vs N                              | 33.485  | 36.9744   | 17.6672    | 1         |
| cg04249305                          | SFRS8                         | 6.42E-05          | 6.42E-05             | 0.069846           | -14.3173                     | T down vs N                            | 28.699  | 66.3443   | 36.9874    | 1         |
| cg04249559                          | B4GALNT3                      | 6.18E-06          | 6.18E-06             | 0.057995           | -17.2428                     | T down vs N                            | 43.477  | 75.9377   | 27.9458    | 1         |
| cg04253037                          | DDX56                         | 0.00154326        | 0.00154326           | 0.296884           | -3.36832                     | T down vs N                            | 14.508  | 13.8132   | 15.2335    | 1         |
| cg04255770                          | TAP2;TAP2                     | 0.000182          | 0.000182003          | 0.272004           | -3.67642                     | T down vs N                            | 23.398  | 15.8761   | 10.8561    | 1         |
| P2RX2;P2RX2;P2RX2;P2RX2;P2RX2;P2RX2 |                               |                   |                      |                    |                              |                                        |         |           |            |           |
| cg04256238                          | RX2                           | 2.31E-06          | 2.31E-06             | 0.174845           | -5.71934                     | T down vs N                            | 51.119  | 28.4827   | 8.91499    | 1         |
| cg04256516                          | C9orf156                      | 0.00044175        | 0.000441754          | 0.226261           | -4.41968                     | T down vs N                            | 19.412  | 20.6842   | 17.0483    | 1         |
| cg04263436                          | B3GALT4                       | 0.00079384        | 0.000793839          | 4.36885            | 4.36885                      | T up vs N                              | 17.016  | 20.3634   | 19.148     | 1         |
| cg04265672                          | RNF130                        | 5.30E-06          | 5.30E-06             | 9.4515             | 9.4515                       | T up vs N                              | 44.608  | 47.2551   | 16.9495    | 1         |
| cg04266607                          | JAZF1                         | 0.00279939        | 0.00279939           | 0.293191           | -3.41075                     | T down vs N                            | 12.44   | 14.0995   | 18.135     | 1         |
| cg04269043                          | CNGB1                         | 0.00130498        | 0.00130498           | 3.14409            | 3.14409                      | T up vs N                              | 15.121  | 12.2905   | 13.0054    | 1         |
| cg04269057                          | UNC5B                         | 0.00022265        | 0.000222649          | 0.238179           | -4.19853                     | T down vs N                            | 22.452  | 19.2799   | 13.7393    | 1         |
| cg04273867                          | RAB11FIP3;RAB11FIP3           | 0.00129421        | 0.00129421           | 0.332946           | -3.00349                     | T down vs N                            | 15.151  | 11.3284   | 11.9631    | 1         |
| cg04275841                          | EPHA1;EPHA1                   | 0.00515093        | 0.00515093           | 3.0877             | 3.0877                       | T up vs N                              | 10.484  | 11.9052   | 18.1694    | 1         |
| cg04277677                          | CARD10                        | 1.40E-05          | 1.40E-05             | 0.314375           | -3.18092                     | T down vs N                            | 37.809  | 12.5417   | 5.30741    | 1         |
| cg04279139                          | LOC100133893                  | 3.81E-05          | 3.81E-05             | 0.297851           | -3.35738                     | T down vs N                            | 31.628  | 13.7393   | 6.95048    | 1         |
| cg04281209                          | CPZ;CPZ;CPZ                   | 9.47E-06          | 9.47E-06             | 0.200792           | -4.98028                     | T down vs N                            | 40.442  | 24.1421   | 9.55133    | 1         |
| cg04281261                          | LOC643406                     | 6.64E-05          | 6.64E-05             | 0.298099           | -3.35459                     | T down vs N                            | 28.512  | 13.7205   | 7.69949    | 1         |
| cg04282607                          | MIR301B;MIR130B               | 5.16E-05          | 5.16E-05             | 0.329259           | -3.03712                     | T down vs N                            | 29.897  | 11.559    | 6.18603    | 1         |
| cg04283926                          | PPCS;PPCS                     | 2.27E-05          | 2.27E-05             | 0.230612           | -4.33629                     | T down vs N                            | 34.725  | 20.1573   | 9.28764    | 1         |
| cg04284063                          | LMNB1                         | 0.00157238        | 0.00157238           | 0.263449           | -3.7958                      | T down vs N                            | 14.441  | 16.665    | 18.4643    | 1         |
| cg04284140                          | POLD2;POLD2                   | 0.00013633        | 0.000136325          | 4.57169            | 4.57169                      | T up vs N                              | 24.798  | 21.6362   | 13.96      | 1         |
| cg04284658                          | ESPNL                         | 5.72E-05          | 5.72E-05             | 0.292281           | -3.42137                     | T down vs N                            | 29.323  | 14.171    | 7.73227    | 1         |
| cg04285177                          | INPP5E                        | 0.00082245        | 0.000822452          | 0.303509           | -3.29479                     | T down vs N                            | 16.877  | 13.3157   | 12.6241    | 1         |
| cg04286003                          | NLRC3                         | 3.26E-06          | 3.26E-06             | 0.287273           | -3.48101                     | T down vs N                            | 48.325  | 14.572    | 4.82466    | 1         |
| CASP8;CASP8;CASP8;CASP8;CASP8;CASP8 |                               |                   |                      |                    |                              |                                        |         |           |            |           |
| cg04286206                          | SP8                           | 6.72E-06          | 6.72E-06             | 0.256439           | -3.89956                     | T down vs N                            | 42.871  | 17.3457   | 6.47367    | 1         |
| cg04287259                          | PIK3CD                        | 0.00027168        | 0.00027168           | 0.322693           | -3.09892                     | T down vs N                            | 21.542  | 11.982    | 8.89959    | 1         |
| cg04288999                          | MEIS1                         | 0.00016765        | 0.000167646          | 0.233356           | -4.2853                      | T down vs N                            | 23.791  | 19.8336   | 13.3385    | 1         |
| cg04289385                          | ETV7                          | 1.00E-05          | 1.00E-05             | 4.60538            | 4.60538                      | T up vs N                              | 40.062  | 21.8458   | 8.72473    | 1         |
| cg04296699                          | C2CD4D;LOC100132111           | 1.33E-05          | 1.33E-05             | 12.5716            | 12.5716                      | T up vs N                              | 38.141  | 60.02     | 25.1782    | 1         |
| cg04297995                          | SIGLEC6;SIGLEC6;SIGLEC6       | 0.00272023        | 0.00272023           | 0.29392            | -3.40228                     | T down vs N                            | 12.536  | 14.0424   | 17.9233    | 1         |
| LOC284798;LOC284798;LOC284798       |                               |                   |                      |                    |                              |                                        |         |           |            |           |
| cg04299389                          | LOC284798;LOC284798;LOC284798 | 3.29E-05          | 3.29E-05             | 11.4117            | 11.4117                      | T up vs N                              | 32.479  | 55.5175   | 27.3492    | 1         |
| cg04303560                          | PAGE5;PAGE5                   | 0.00081938        | 0.000819381          | 0.288573           | -3.46533                     | T down vs N                            | 16.891  | 14.4667   | 13.7034    | 1         |
| cg04304802                          | CDH23                         | 0.00132554        | 0.00132554           | 0.332264           | -3.00966                     | T down vs N                            | 15.063  | 11.3707   | 12.0781    | 1         |
| cg04305539                          | ZNF695                        | 6.06E-06          | 6.06E-06             | 0.220765           | -4.5297                      | T down vs N                            | 43.618  | 21.3743   | 7.84063    | 1         |
| cg04305621                          | SLC16A5                       | 3.79E-05          | 3.79E-05             | 3.00846            | 3.00846                      | T up vs N                              | 31.66   | 11.3625   | 5.74221    | 1         |
| cg04306507                          | LGALS3                        | 0.00021517        | 0.000215173          | 0.263064           | -3.80136                     | T down vs N                            | 22.611  | 16.7016   | 11.8184    | 1         |
| cg04307594                          | LOC284578                     | 5.28E-06          | 5.28E-06             | 0.14961            | -6.68404                     | T down vs N                            | 44.628  | 33.802    | 12.1187    | 1         |
| cg04308274                          | FLJ30058                      | 0.00612454        | 0.00612454           | 3.7442             | 3.7442                       | T up vs N                              | 9.957   | 16.3248   | 26.2325    | 1         |
| cg04309404                          | DKKL1                         | 4.81E-05          | 4.81E-05             | 0.266245           | -3.75594                     | T down vs N                            | 30.291  | 16.4022   | 8.66384    | 1         |
| cg04309885                          | CABP5                         | 6.92E-06          | 6.92E-06             | 0.135962           | -7.355                       | T down vs N                            | 42.659  | 37.2918   | 13.9869    | 1         |
| cg04311510                          | SHE                           | 0.00052511        | 0.000525113          | 0.252112           | -3.96648                     | T down vs N                            | 18.687  | 17.7822   | 15.2256    | 1         |
| cg04311971                          | OR4D1;MSX2P1                  | 0.00133648        | 0.00133648           | 0.308289           | -3.24371                     | T down vs N                            | 15.033  | 12.969    | 13.8036    | 1         |
| cg04312209                          | IL7R                          | 1.76E-05          | 1.76E-05             | 0.224414           | -4.45605                     | T down vs N                            | 36.324  | 20.913    | 9.21184    | 1         |
| cg04313385                          | NTF3;NTF3                     | 3.16E-05          | 3.16E-05             | 0.313252           | -3.19231                     | T down vs N                            | 32.727  | 12.6193   | 6.16951    | 1         |
| cg04314114                          | IRX3                          | 0.00119758        | 0.00119758           | 4.74433            | 4.74433                      | T up vs N                              | 15.439  | 22.7045   | 23.529     | 1         |
| cg04316624                          | HOXD3                         | 0.00039555        | 0.000395551          | 8.08709            | 8.08709                      | T up vs N                              | 19.885  | 40.9228   | 32.9281    | 1         |
| cg04318353                          | FAM38A                        | 6.51E-06          | 6.51E-06             | 4.5814             | 4.5814                       | T up vs N                              | 43.1    | 21.6967   | 8.05443    | 1         |
| cg04320255                          | FOXP1                         | 4.50E-05          | 4.50E-05             | 0.175938           | -5.68382                     | T down vs N                            | 30.673  | 28.2796   | 14.7517    | 1         |
| cg04323365                          | GJB1;GJB1;BCYRN1;GJB1         | 0.00354937        | 0.00354937           | 0.316378           | -3.16078                     | T down vs N                            | 11.659  | 12.4044   | 17.0225    | 1         |
| cg04323427                          | C1orf94;C1orf94;C1orf94       | 1.13E-05          | 1.13E-05             | 7.23654            | 7.23654                      | T up vs N                              | 39.221  | 36.6873   | 14.9663    | 1         |
| cg04323713                          | ATF3                          | 7.42E-05          | 7.42E-05             | 0.211388           | -4.73064                     | T down vs N                            | 27.915  | 22.6202   | 12.9651    | 1         |
| cg04324615                          | FBLN7;FBLN7                   | 2.91E-05          | 2.91E-05             | 3.39349            | 3.39349                      | T up vs N                              | 33.221  | 13.9831   | 6.73453    | 1         |
| cg04324758                          | KLF2                          | 0.00707711        | 0.00707711           | 5.0103             | 5.0103                       | T up vs N                              | 9.5265  | 24.3232   | 40.8514    | 1         |
| cg04325221                          | DUOXA1;DUOXA2                 | 0.00428421        | 0.00428421           | 4.46518            | 4.46518                      | T up vs N                              | 11.058  | 20.9703   | 30.3423    | 1         |
| cg04328477                          | ESRP2                         | 7.65E-06          | 7.65E-06             | 8.53279            | 8.53279                      | T up vs N                              | 41.935  | 43.0504   | 16.4257    | 1         |
| cg04329454                          | C6orf227                      | 0.00187271        | 0.00187271           | 3.91128            | 3.91128                      | T up vs N                              | 13.818  | 17.4222   | 20.173     | 1         |
| cg04330806                          | DBF4;SLC25A40                 | 0.0001113         | 0.000111301          | 0.270862           | -3.69192                     | T down vs N                            | 25.811  | 15.9788   | 9.90503    | 1         |
| cg04331802                          | CDS1                          | 0.00102416        | 0.00102416           | 0.332507           | -3.00746                     | T down vs N                            | 16.029  | 11.3556   | 11.335     | 1         |
| cg04332433                          | MUC4;MUC4;MUC4                | 0.00060644        | 0.000606437          | 0.19321            | -4.55953                     | T down vs N                            | 18.094  | 21.5605   | 19.065     | 1         |
| cg04334885                          | PDPK1;LOC652276;PDPK1         | 0.00516909        | 0.00516909           | 0.329824           | -3.03192                     | T down vs N                            | 10.473  | 11.5233   | 17.6048    | 1         |
| cg04336859                          | SIGLEC12                      | 5.11E-05          | 5.11E-05             | 0.187269           | -5.33993                     | T down vs N                            | 29.954  | 26.2846   | 14.04      | 1         |
| cg04337270                          | DHX15                         | 0.00031375        | 0.000313751          | 0.228335           | -4.37953                     | T down vs N                            | 20.897  | 20.431    | 15.6431    | 1         |
| cg04337854                          | BVES                          | 1.03E-08          | 1.03E-08             | 0.134673           | -7.4254                      | T down vs N                            | 115     | 37.6487   | 5.23804    | 1         |
| cg04338129                          | EFEMP2                        | 0.00357994        | 0.00357994           | 3.64109            | 3.64109                      | T up vs N                              | 11.632  | 15.6414   | 21.5159    | 1         |
| BCAR1;BCAR1;BCAR1;BCAR1;BCAR1       |                               |                   |                      |                    |                              |                                        |         |           |            |           |
| cg04339240                          | BCAR1;BCAR1;BCAR1;BCAR1;BCAR1 | 0.00185975        | 0.00185975           | 3.00129            | 3.00129                      | T up vs N                              | 13.843  | 11.3133   | 13.0764    | 1         |
| cg04340510                          | C1orf66;C1orf66               | 5.51E-05          | 5.51E-05             | 0.302275           | -3.30825                     | T down vs N                            | 29.537  | 13.4069   | 7.26243    | 1         |

| Probeset ID                         | UCSC_REFGENE_NAME           | p-value<br>(Type) | p-value (T vs.<br>N) | Ratio (T<br>vs. N) | Fold-<br>Change (T<br>vs. N) | Fold-Change (T vs.<br>N) (Description) | F(Type) | SS (Type) | SS (Error) | F (Error) |
|-------------------------------------|-----------------------------|-------------------|----------------------|--------------------|------------------------------|----------------------------------------|---------|-----------|------------|-----------|
| cg04343794                          | TNFRSF18;TNFRSF18;TNFRSF18  | 4.68E-05          | 4.68E-05             | 4.66098            | 4.66098                      | T up vs N                              | 30.449  | 22.1904   | 11.6604    | 1         |
| cg04344730                          | DAB1                        | 6.93E-06          | 6.93E-06             | 0.269163           | -3.71522                     | T down vs N                            | 42.647  | 16.1331   | 6.05279    | 1         |
| cg04346283                          | FAM46A                      | 0.00120008        | 0.00120008           | 0.192445           | -5.1963                      | T down vs N                            | 15.432  | 25.436    | 26.373     | 1         |
| cg04346459                          | NFYA;NFYA;LOC221442         | 0.00221837        | 0.00221837           | 3.78962            | 3.78962                      | T up vs N                              | 13.229  | 16.6243   | 20.1073    | 1         |
| cg04351807                          | LDLRAD3                     | 0.00024396        | 0.000243961          | 0.270165           | -3.70144                     | T down vs N                            | 22.031  | 16.0419   | 11.6503    | 1         |
| cg04354077                          | PROKR2                      | 0.00032463        | 0.000324633          | 0.167349           | -5.97554                     | T down vs N                            | 20.746  | 29.9322   | 23.0844    | 1         |
| cg04355697                          | GJA3                        | 5.73E-05          | 5.73E-05             | 0.222665           | -4.49104                     | T down vs N                            | 29.315  | 21.1325   | 11.534     | 1         |
| cg04357717                          | ZPLD1                       | 0.0002971         | 0.000297096          | 0.285327           | -3.50475                     | T down vs N                            | 21.14   | 14.7313   | 11.1495    | 1         |
| cg04358131                          | MAFK                        | 0.00020424        | 0.000204235          | 0.270016           | -3.70349                     | T down vs N                            | 22.855  | 16.0555   | 11.2401    | 1         |
| cg04359753                          | ID4                         | 6.73E-06          | 6.73E-06             | 0.16597            | -6.02518                     | T down vs N                            | 42.856  | 30.2099   | 11.2787    | 1         |
| cg04359828                          | ARHGAP12                    | 0.00059482        | 0.000594817          | 0.296591           | -3.37164                     | T down vs N                            | 18.173  | 13.8357   | 12.1811    | 1         |
| cg04360793                          | ELTD1;ELTD1                 | 0.00073638        | 0.000736379          | 10.2964            | 10.2964                      | T up vs N                              | 17.313  | 50.9261   | 47.0643    | 1         |
| cg04364561                          | FGF12                       | 0.00040108        | 0.000401077          | 4.46001            | 4.46001                      | T up vs N                              | 19.825  | 20.9378   | 16.8981    | 1         |
| cg04365481                          | MST1P9                      | 6.63E-05          | 6.63E-05             | 4.44291            | 4.44291                      | T up vs N                              | 28.518  | 20.8304   | 11.6871    | 1         |
| cg04367107                          | GRM5;GRM5                   | 0.00074388        | 0.000743878          | 0.32545            | -3.07267                     | T down vs N                            | 17.273  | 11.8024   | 10.9329    | 1         |
| KCNJ1;KCNJ1;KCNJ1;KCNJ1;KCNJ1;KCNJ1 |                             |                   |                      |                    |                              |                                        |         |           |            |           |
| cg04367216                          | J1;KCNJ1;KCNJ1              | 0.00042818        | 0.000428183          | 0.216016           | -4.62929                     | T down vs N                            | 19.545  | 21.9942   | 18.0049    | 1         |
| cg04372933                          | ZNF727                      | 2.09E-05          | 2.09E-05             | 0.247354           | -4.04279                     | T down vs N                            | 35.251  | 18.2774   | 8.29587    | 1         |
| cg04373379                          | SLFN12L                     | 2.96E-05          | 2.96E-05             | 0.21382            | -4.67684                     | T down vs N                            | 33.109  | 22.2885   | 10.7709    | 1         |
| cg04374711                          | STX1B                       | 2.89E-06          | 2.89E-06             | 13.0122            | 13.0122                      | T up vs N                              | 49.28   | 61.6647   | 20.0212    | 1         |
| cg04376747                          | RBM42                       | 4.74E-06          | 4.74E-06             | 0.243092           | -4.11367                     | T down vs N                            | 45.436  | 18.735    | 6.59748    | 1         |
| cg04377850                          | ZC3H18                      | 1.66E-05          | 1.66E-05             | 7.09414            | 7.09414                      | T up vs N                              | 36.684  | 35.9542   | 15.6818    | 1         |
| cg04380107                          | B4GALNT2;B4GALNT2;B4GALNT2  | 3.43E-05          | 3.43E-05             | 0.261471           | -3.82452                     | T down vs N                            | 32.239  | 16.8538   | 8.36437    | 1         |
| cg04382396                          | ELANE;ELANE                 | 1.97E-05          | 1.97E-05             | 0.119483           | -8.36941                     | T down vs N                            | 35.622  | 42.2775   | 18.9896    | 1         |
| cg04382643                          | KLC3                        | 0.00101587        | 0.00101587           | 0.281037           | -3.55825                     | T down vs N                            | 16.06   | 15.0893   | 15.0328    | 1         |
| cg04382783                          | MS4A5                       | 1.22E-05          | 1.22E-05             | 0.129227           | -7.73833                     | T down vs N                            | 38.735  | 39.215    | 16.1981    | 1         |
| FCGR3A;FCGR3A;FCGR3A;FCGR3A;FCG     |                             |                   |                      |                    |                              |                                        |         |           |            |           |
| cg04384208                          | R3A                         | 0.00026468        | 0.000264682          | 0.306829           | -3.25915                     | T down vs N                            | 21.66   | 13.0739   | 9.65763    | 1         |
| cg04389484                          | TNXB                        | 0.00448853        | 0.00448853           | 0.260527           | -3.83838                     | T down vs N                            | 10.911  | 16.9449   | 24.8472    | 1         |
| cg04389917                          | MXRA5                       | 1.04E-07          | 1.04E-07             | 0.139181           | -7.18489                     | T down vs N                            | 82.375  | 36.4222   | 7.07446    | 1         |
| cg04392234                          | IL8                         | 0.00085935        | 0.000859349          | 0.309515           | -3.23086                     | T down vs N                            | 16.705  | 12.8816   | 12.3379    | 1         |
| cg04392286                          | HK2                         | 2.09E-07          | 2.09E-07             | 0.267372           | -3.74011                     | T down vs N                            | 74.238  | 16.2977   | 3.51251    | 1         |
| cg04393837                          | LYSMD1;LYSMD1;SCNM1         | 0.00023935        | 0.000239349          | 0.211834           | -4.72068                     | T down vs N                            | 22.119  | 22.559    | 16.3185    | 1         |
| cg04395153                          | MYOG                        | 0.00014171        | 0.000141712          | 0.262938           | -3.80318                     | T down vs N                            | 24.607  | 16.7135   | 10.8674    | 1         |
| cg04396312                          | MMRN2                       | 0.00151714        | 0.00151714           | 4.30183            | 4.30183                      | T up vs N                              | 14.57   | 19.9387   | 21.8957    | 1         |
| cg04396421                          | CYP4F3                      | 0.00012669        | 0.000126687          | 0.196696           | -5.08398                     | T down vs N                            | 25.161  | 24.7658   | 15.7485    | 1         |
| cg04397433                          | MALL;MALL                   | 0.00032696        | 0.000326962          | 39.0137            | 39.0137                      | T up vs N                              | 20.715  | 125.734   | 97.1165    | 1         |
| cg04399083                          | FAM46A                      | 0.00012083        | 0.000120832          | 0.25415            | -3.93468                     | T down vs N                            | 25.398  | 17.575    | 11.0719    | 1         |
| cg04399085                          | COX4NB;COX4I1;COX4NB        | 8.27E-05          | 8.27E-05             | 0.300988           | -3.32239                     | T down vs N                            | 27.345  | 13.5026   | 7.90063    | 1         |
| cg04399147                          | DAXX;DAXX;DAXX;DAXX         | 0.0026663         | 0.0026663            | 0.268705           | -3.72155                     | T down vs N                            | 12.603  | 16.175    | 20.5352    | 1         |
| cg04400131                          | CACHD1                      | 5.01E-05          | 5.01E-05             | 0.332195           | -3.01028                     | T down vs N                            | 30.066  | 11.375    | 6.05331    | 1         |
| cg04401646                          | GRTP1                       | 4.53E-06          | 4.53E-06             | 0.196679           | -5.08443                     | T down vs N                            | 45.791  | 24.7685   | 8.65455    | 1         |
| cg04401986                          | FGF5;FGF5                   | 2.66E-06          | 2.66E-06             | 36.1605            | 36.1605                      | T up vs N                              | 49.955  | 120.575   | 38.6193    | 1         |
| cg04403474                          | CGB5                        | 5.51E-06          | 5.51E-06             | 0.296471           | -3.37301                     | T down vs N                            | 44.31   | 13.8449   | 4.99929    | 1         |
| cg04403809                          | SLC12A5;SLC12A5             | 0.00011959        | 0.000119587          | 4.05936            | 4.05936                      | T up vs N                              | 27.718  | 16.3418   | 8.25411    | 1         |
| cg04405075                          | LOC100288797                | 0.00040484        | 0.00040484           | 0.270872           | -3.69178                     | T down vs N                            | 19.785  | 15.9779   | 12.9213    | 1         |
| cg04406111                          | TACC2;TACC2                 | 9.39E-06          | 9.39E-06             | 20.346             | 20.346                       | T up vs N                              | 40.507  | 85.021    | 33.5832    | 1         |
| cg04406981                          | SNAR-C3                     | 1.50E-05          | 1.50E-05             | 0.29971            | -3.33656                     | T down vs N                            | 37.36   | 13.5985   | 5.8238     | 1         |
| cg04407248                          | PRSS8                       | 8.14E-06          | 8.14E-06             | 0.183451           | -5.45103                     | T down vs N                            | 41.5    | 26.9348   | 10.3845    | 1         |
| cg04409954                          | SLC22A25                    | 0.00010629        | 0.000106286          | 0.142631           | -7.01111                     | T down vs N                            | 26.045  | 35.5234   | 21.8225    | 1         |
| cg04410989                          | SAMHD1                      | 0.00126105        | 0.00126105           | 0.308696           | -3.23943                     | T down vs N                            | 15.247  | 12.9399   | 13.5788    | 1         |
| cg04411454                          | PCDH21                      | 0.00021874        | 0.000218738          | 0.284529           | -3.51458                     | T down vs N                            | 22.535  | 14.7971   | 10.5063    | 1         |
| cg04413226                          | FMO1                        | 0.00063148        | 0.000631476          | 0.307089           | -3.25638                     | T down vs N                            | 17.93   | 13.0551   | 11.6499    | 1         |
| cg04413547                          | ALKBH3                      | 0.00601136        | 0.00601136           | 0.299528           | -3.33859                     | T down vs N                            | 10.013  | 13.6123   | 21.7511    | 1         |
| cg04413853                          | C17orf64                    | 9.65E-05          | 9.65E-05             | 0.27723            | -3.60712                     | T down vs N                            | 26.54   | 15.4153   | 9.29326    | 1         |
| cg04414509                          | MECOM                       | 0.00066368        | 0.000663681          | 0.244495           | -4.09007                     | T down vs N                            | 17.729  | 18.5829   | 16.7708    | 1         |
| cg04414917                          | ATP2A1;ATP2A1;ATP2A1;ATP2A1 | 2.19E-06          | 2.19E-06             | 0.136832           | -7.30822                     | T down vs N                            | 51.569  | 37.0537   | 11.4965    | 1         |
| cg04415662                          | HYAL3                       | 1.23E-06          | 1.23E-06             | 0.318186           | -3.14281                     | T down vs N                            | 56.512  | 12.2818   | 3.47727    | 1         |
| cg04415672                          | CTDSP2                      | 0.00051838        | 0.000518383          | 3.4923             | 3.4923                       | T up vs N                              | 18.74   | 14.6478   | 12.5059    | 1         |
| cg04419610                          | GRIN2D                      | 5.68E-05          | 5.68E-05             | 7.24231            | 7.24231                      | T up vs N                              | 30.675  | 34.5571   | 16.8984    | 1         |
| cg04420309                          | RHOD                        | 0.0001969         | 0.000196902          | 11.9183            | 11.9183                      | T up vs N                              | 23.026  | 57.5163   | 39.9657    | 1         |
| cg04421891                          | DCBLD1                      | 3.41E-05          | 3.41E-05             | 0.179176           | -5.58111                     | T down vs N                            | 32.269  | 27.6891   | 13.729     | 1         |
| cg04421971                          | EMX2OS                      | 0.00047418        | 0.000474183          | 0.253566           | -3.94375                     | T down vs N                            | 19.113  | 17.6341   | 14.762     | 1         |
| cg04422256                          | GRID1                       | 5.93E-06          | 5.93E-06             | 3.27769            | 3.27769                      | T up vs N                              | 43.774  | 13.1997   | 4.82464    | 1         |
| cg04424621                          | HIST1H2BJ                   | 3.07E-05          | 3.07E-05             | 0.320073           | -3.12428                     | T down vs N                            | 32.889  | 12.1553   | 5.9134     | 1         |
| cg04426607                          | SLC22A24                    | 1.03E-05          | 1.03E-05             | 0.15457            | -6.46957                     | T down vs N                            | 39.835  | 32.6514   | 13.1146    | 1         |
| cg04428805                          | HELZ                        | 3.36E-05          | 3.36E-05             | 0.204768           | -4.88358                     | T down vs N                            | 32.363  | 23.556    | 11.6459    | 1         |
| cg04431844                          | KRT37                       | 2.18E-05          | 2.18E-05             | 0.239235           | -4.18                        | T down vs N                            | 34.978  | 19.1612   | 8.76498    | 1         |
| cg04433322                          | SLC4A1                      | 1.13E-05          | 1.13E-05             | 0.250665           | -3.98939                     | T down vs N                            | 39.229  | 17.9311   | 7.31342    | 1         |
| cg04436255                          | MT1A                        | 2.39E-06          | 2.39E-06             | 14.1832            | 14.1832                      | T up vs N                              | 50.823  | 65.876    | 20.7388    | 1         |
| cg04436634                          | OR10Z1                      | 2.82E-06          | 2.82E-06             | 0.177635           | -5.62952                     | T down vs N                            | 49.494  | 27.968    | 9.0413     | 1         |
| cg04436847                          | EGF                         | 0.00052168        | 0.000521675          | 0.179908           | -5.55839                     | T down vs N                            | 18.714  | 27.5579   | 23.5614    | 1         |

| Probeset ID | UCSC_REFGENE_NAME                                                                               | p-value<br>(Type) | p-value (T vs.<br>N) | Ratio (T<br>vs. N) | Fold-<br>Change (T<br>vs. N) | Fold-Change (T vs.<br>N) (Description) | F(Type) | SS (Type) | SS (Error) | F (Error) |
|-------------|-------------------------------------------------------------------------------------------------|-------------------|----------------------|--------------------|------------------------------|----------------------------------------|---------|-----------|------------|-----------|
| cg04439513  | OR5K4                                                                                           | 0.00289036        | 0.00289036           | 0.206111           | -4.85176                     | T down vs N                            | 12.333  | 23.3622   | 30.3085    | 1         |
| cg04439776  | TYSND1;TYSND1                                                                                   | 1.32E-05          | 1.32E-05             | 0.295175           | -3.38782                     | T down vs N                            | 38.191  | 13.9449   | 5.84215    | 1         |
| cg04439862  | STIM2;STIM2;STIM2                                                                               | 0.00391607        | 0.00391607           | 0.307275           | -3.25442                     | T down vs N                            | 11.343  | 13.0417   | 18.3958    | 1         |
| cg04442631  | APOL4;APOL4                                                                                     | 9.75E-05          | 9.75E-05             | 0.241104           | -4.14759                     | T down vs N                            | 26.487  | 18.9532   | 11.4491    | 1         |
| cg04450606  | PGLYRP3                                                                                         | 4.68E-06          | 4.68E-06             | 0.180477           | -5.54087                     | T down vs N                            | 45.535  | 27.4565   | 9.64763    | 1         |
| cg04452095  | SEPT9;SEPT9;SEPT9;SEPT9                                                                         | 1.65E-05          | 1.65E-05             | 0.304905           | -3.27971                     | T down vs N                            | 36.737  | 13.2134   | 5.75481    | 1         |
| cg04455137  | C7orf58;C7orf58                                                                                 | 2.44E-06          | 2.44E-06             | 0.203423           | -4.91586                     | T down vs N                            | 50.676  | 23.7521   | 7.49935    | 1         |
| cg04455643  | NCOA4;NCOA4;NCOA4;NCOA4;NCOA4                                                                   | 0.00429803        | 0.00429803           | 0.323088           | -3.09513                     | T down vs N                            | 11.048  | 11.956    | 17.3154    | 1         |
| cg04456662  | TRIM40                                                                                          | 0.00102633        | 0.00102633           | 0.326284           | -3.06481                     | T down vs N                            | 16.021  | 11.7486   | 11.7332    | 1         |
| cg04458924  | GALNS                                                                                           | 0.00045362        | 0.000453624          | 0.230215           | -4.34376                     | T down vs N                            | 19.3    | 20.2047   | 16.75      | 1         |
| cg04460984  | CHRN84                                                                                          | 3.38E-05          | 3.38E-05             | 40.3153            | 40.3153                      | T up vs N                              | 32.319  | 127.996   | 63.3666    | 1         |
| cg04461228  | FLJ42709;FLJ42709;FLJ42709                                                                      | 1.67E-05          | 1.67E-05             | 7.60827            | 7.60827                      | T up vs N                              | 36.676  | 38.5679   | 16.8255    | 1         |
| cg04463607  | FAM55B                                                                                          | 1.06E-06          | 1.06E-06             | 0.132927           | -7.52295                     | T down vs N                            | 57.868  | 38.1405   | 10.5455    | 1         |
| cg04464446  | GAL                                                                                             | 0.00015612        | 0.000156122          | 3.05525            | 3.05525                      | T up vs N                              | 24.135  | 11.6832   | 7.74526    | 1         |
| cg04466840  | RGS14                                                                                           | 4.51E-06          | 4.51E-06             | 0.062091           | -16.1054                     | T down vs N                            | 45.818  | 72.3415   | 25.262     | 1         |
| cg04468081  | MCF2L2;B3GNT5                                                                                   | 0.00081526        | 0.000815261          | 0.319679           | -3.12814                     | T down vs N                            | 16.911  | 12.1816   | 11.5254    | 1         |
| cg04470054  | RPTOR;RPTOR                                                                                     | 0.00529022        | 0.00529022           | 0.230834           | -4.33211                     | T down vs N                            | 10.402  | 20.1309   | 30.9654    | 1         |
| cg04470072  | PSKH2                                                                                           | 6.89E-05          | 6.89E-05             | 5.00278            | 5.00278                      | T up vs N                              | 28.316  | 24.2778   | 13.718     | 1         |
| cg04471779  | NRP2;NRP2;NRP2;NRP2;NRP2;NRP2                                                                   | 7.21E-05          | 7.21E-05             | 0.317131           | -3.15327                     | T down vs N                            | 28.074  | 12.3532   | 7.04041    | 1         |
| cg04472592  | KRT80;KRT80                                                                                     | 3.83E-05          | 3.83E-05             | 0.240936           | -4.15049                     | T down vs N                            | 31.592  | 18.9718   | 9.60837    | 1         |
| cg04473302  | SLC26A4;LOC286002;SLC26A4                                                                       | 0.00441471        | 0.00441471           | 5.04033            | 5.04033                      | T up vs N                              | 10.964  | 24.5039   | 35.7607    | 1         |
| cg04474366  | SNORA4;EIF4A2                                                                                   | 0.00031306        | 0.000313056          | 0.303444           | -3.2955                      | T down vs N                            | 20.907  | 13.3205   | 10.1941    | 1         |
| cg04475868  | LOC732275                                                                                       | 0.00175824        | 0.00175824           | 0.308634           | -3.24009                     | T down vs N                            | 14.041  | 12.9444   | 14.7501    | 1         |
| cg04476070  | ZC3H18                                                                                          | 0.00435968        | 0.00435968           | 0.29011            | -3.44697                     | T down vs N                            | 11.003  | 14.3433   | 20.8574    | 1         |
| cg04476891  | DEFB121                                                                                         | 2.40E-05          | 2.40E-05             | 0.223904           | -4.46619                     | T down vs N                            | 34.375  | 20.9766   | 9.76381    | 1         |
| cg04478223  | EMB                                                                                             | 0.0002593         | 0.000259303          | 0.316908           | -3.15549                     | T down vs N                            | 21.753  | 12.3683   | 9.09729    | 1         |
| cg04478428  | SLC17A9;SLC17A9                                                                                 | 0.0003569         | 0.000356895          | 4.33901            | 4.33901                      | T up vs N                              | 20.33   | 20.1746   | 15.8774    | 1         |
| cg04478905  | CLDN14;CLDN14                                                                                   | 1.59E-05          | 1.59E-05             | 4.02477            | 4.02477                      | T up vs N                              | 36.975  | 18.1606   | 7.85858    | 1         |
| cg04481170  | RARRES1;RARRES1                                                                                 | 3.84E-06          | 3.84E-06             | 0.230021           | -4.34742                     | T down vs N                            | 47.05   | 20.2279   | 6.87883    | 1         |
| cg04481923  | MIR886                                                                                          | 0.0005748         | 0.000574801          | 4.08667            | 4.08667                      | T up vs N                              | 18.313  | 18.561    | 16.2163    | 1         |
| cg04482331  | TMEM63B                                                                                         | 0.00336463        | 0.00336463           | 3.30022            | 3.30022                      | T up vs N                              | 11.833  | 13.3525   | 18.0548    | 1         |
| cg04482798  | RNF222                                                                                          | 0.00132412        | 0.00132412           | 0.292857           | -3.41464                     | T down vs N                            | 15.067  | 14.1257   | 15.0005    | 1         |
| cg04484550  | FLJ42875                                                                                        | 0.00096985        | 0.000969848          | 3.36284            | 3.36284                      | T up vs N                              | 16.237  | 13.7762   | 13.5748    | 1         |
| cg04485799  | IL17REL                                                                                         | 0.0013479         | 0.0013479            | 5.4605             | 5.4605                       | T up vs N                              | 15.001  | 26.9899   | 28.7867    | 1         |
| cg04486873  | C1orf94;C1orf94                                                                                 | 3.34E-05          | 3.34E-05             | 0.28846            | -3.46668                     | T down vs N                            | 32.388  | 14.4758   | 7.15123    | 1         |
| cg04489012  | LOC100132111;C2CD4D;C2CD4D                                                                      | 0.00603339        | 0.00603339           | 0.325217           | -3.07487                     | T down vs N                            | 10.002  | 11.8175   | 18.904     | 1         |
| cg04493793  | RASGRF2                                                                                         | 5.30E-05          | 5.30E-05             | 0.317785           | -3.14679                     | T down vs N                            | 29.752  | 12.3089   | 6.6194     | 1         |
| cg04494562  | PCCA;PCCA                                                                                       | 0.00212797        | 0.00212797           | 0.152451           | -6.55948                     | T down vs N                            | 13.372  | 33.1358   | 39.6477    | 1         |
| cg04496081  | LYZL6                                                                                           | 2.24E-05          | 2.24E-05             | 0.164327           | -6.08542                     | T down vs N                            | 34.806  | 30.5455   | 14.0413    | 1         |
| cg04497354  | TRIM40                                                                                          | 7.15E-06          | 7.15E-06             | 0.279815           | -3.5738                      | T down vs N                            | 42.421  | 15.1931   | 5.73037    | 1         |
| cg04498198  | TP53I13                                                                                         | 0.00013897        | 0.000138971          | 4.4786             | 4.4786                       | T up vs N                              | 24.703  | 21.0545   | 13.6367    | 1         |
| cg04498349  | GRIN2A;GRIN2A;GRIN2A                                                                            | 2.39E-05          | 2.39E-05             | 4.36969            | 4.36969                      | T up vs N                              | 34.412  | 20.3688   | 9.47067    | 1         |
| cg04500084  | PTCHD3                                                                                          | 0.00028827        | 0.000288265          | 0.290601           | -3.44115                     | T down vs N                            | 21.275  | 14.3041   | 10.7575    | 1         |
| cg04503340  | AP3B1                                                                                           | 2.72E-06          | 2.72E-06             | 0.219172           | -4.56263                     | T down vs N                            | 49.778  | 21.5798   | 6.93638    | 1         |
| cg04503600  | PCDHGA4;PCDHGA9;PCDHGA1;PCDHG<br>B1;PCDHGB7;PCDHGB6;PCDHGB3;PCD<br>HGA6;PCDHGA8;PCDHGA10;PCDHGA | 5.97E-06          | 5.97E-06             | 4.30621            | 4.30621                      | T up vs N                              | 43.731  | 19.9665   | 7.30525    | 1         |
| cg04504066  | PAX6;PAX6;PAX6                                                                                  | 6.00E-05          | 6.00E-05             | 4.72529            | 4.72529                      | T up vs N                              | 29.067  | 22.5873   | 12.4333    | 1         |
| cg04505023  | SPRR1A                                                                                          | 3.65E-05          | 3.65E-05             | 0.233365           | -4.28513                     | T down vs N                            | 31.867  | 19.8325   | 9.95752    | 1         |
| cg04508114  | ABLIM1;ABLIM1                                                                                   | 2.95E-05          | 2.95E-05             | 0.239874           | -4.16886                     | T down vs N                            | 33.135  | 19.0898   | 9.21807    | 1         |
| cg04508984  | MCAT;MCAT                                                                                       | 0.00045542        | 0.000455419          | 0.258751           | -3.86472                     | T down vs N                            | 19.283  | 17.1177   | 14.2031    | 1         |
| cg04509221  | PRDM16;PRDM16                                                                                   | 0.00040977        | 0.000409774          | 0.327572           | -3.05277                     | T down vs N                            | 19.733  | 11.6662   | 9.45925    | 1         |
| cg04510049  | COL23A1                                                                                         | 0.0028287         | 0.0028287            | 0.306658           | -3.26096                     | T down vs N                            | 12.405  | 13.0862   | 16.8788    | 1         |
| cg04511702  | PRR15L                                                                                          | 4.14E-05          | 4.14E-05             | 0.301458           | -3.31721                     | T down vs N                            | 31.144  | 13.4676   | 6.91885    | 1         |
| cg04512965  | RFX2;RFX2                                                                                       | 2.10E-05          | 2.10E-05             | 0.3042             | -3.28731                     | T down vs N                            | 35.207  | 13.265    | 6.02828    | 1         |
| cg04513006  | ESRP2                                                                                           | 2.05E-05          | 2.05E-05             | 8.33112            | 8.33112                      | T up vs N                              | 35.353  | 42.0952   | 19.0516    | 1         |
| cg04513422  | C13orf29                                                                                        | 0.00085515        | 0.000855148          | 0.245934           | -4.06613                     | T down vs N                            | 16.724  | 18.4283   | 17.6304    | 1         |
| cg04515001  | KAAG1;DCDC2;KAAG1;DCDC2                                                                         | 0.00174924        | 0.00174924           | 6.5665             | 6.5665                       | T up vs N                              | 14.06   | 33.1735   | 37.7522    | 1         |
| cg04515258  | RPTOR;RPTOR                                                                                     | 2.64E-05          | 2.64E-05             | 0.286054           | -3.49584                     | T down vs N                            | 33.792  | 14.6715   | 6.94665    | 1         |
| cg04517524  | ASB2                                                                                            | 0.00242575        | 0.00242575           | 5.09968            | 5.09968                      | T up vs N                              | 12.923  | 24.8598   | 30.7801    | 1         |
| cg04518342  | PDLIM4;PDLIM4                                                                                   | 0.00045936        | 0.000459364          | 13.8324            | 13.8324                      | T up vs N                              | 19.247  | 64.6378   | 53.7338    | 1         |
| cg04519296  | SYNGR3                                                                                          | 0.00082865        | 0.000828646          | 3.03732            | 3.03732                      | T up vs N                              | 16.847  | 11.5603   | 10.979     | 1         |
| cg04519487  | BCL2L10                                                                                         | 1.26E-05          | 1.26E-05             | 6.92783            | 6.92783                      | T up vs N                              | 38.514  | 35.0888   | 14.5772    | 1         |
| cg04519916  | TMEM132E                                                                                        | 6.96E-05          | 6.96E-05             | 0.305595           | -3.27231                     | T down vs N                            | 28.263  | 13.1632   | 7.45195    | 1         |
| cg04520169  | HCG4P6                                                                                          | 3.06E-05          | 3.06E-05             | 7.1682             | 7.1682                       | T up vs N                              | 32.921  | 36.3364   | 17.6601    | 1         |
| cg04521512  | OR7D2;OR7D2                                                                                     | 2.66E-05          | 2.66E-05             | 0.214625           | -4.65929                     | T down vs N                            | 33.759  | 22.18     | 10.5122    | 1         |
| cg04521765  | LOXL4                                                                                           | 1.37E-05          | 1.37E-05             | 0.275088           | -3.6352                      | T down vs N                            | 37.951  | 15.6023   | 6.57793    | 1         |
| cg04522721  | ARSD                                                                                            | 5.69E-05          | 5.69E-05             | 0.320272           | -3.12234                     | T down vs N                            | 29.352  | 12.142    | 6.61874    | 1         |
| cg04523291  | OXTR                                                                                            | 4.64E-05          | 4.64E-05             | 6.40682            | 6.40682                      | T up vs N                              | 30.498  | 32.3114   | 16.9515    | 1         |

| Probeset ID                                                    | UCSC_REFGENE_NAME             | p-value<br>(Type) | p-value (T vs.<br>N) | Ratio (T<br>vs. N) | Fold-<br>Change (T<br>vs. N) | Fold-Change (T vs.<br>N) (Description) | F(Type) | SS (Type) | SS (Error) | F (Error) |
|----------------------------------------------------------------|-------------------------------|-------------------|----------------------|--------------------|------------------------------|----------------------------------------|---------|-----------|------------|-----------|
| cg04525852                                                     | ANKRD50;ANKRD50               | 0.00016544        | 0.000165436          | 0.272784           | -3.66591                     | T down vs N                            | 23.855  | 15.8063   | 10.6016    | 1         |
| cg04527018                                                     | CHST13                        | 0.00160464        | 0.00160464           | 3.15906            | 3.15906                      | T up vs N                              | 14.368  | 12.3927   | 13.8006    | 1         |
| cg04531097                                                     | RYK;RYK                       | 7.08E-06          | 7.08E-06             | 0.27812            | -3.59557                     | T down vs N                            | 42.491  | 15.3384   | 5.77571    | 1         |
| cg04536922                                                     | FAM13A                        | 0.00072594        | 0.000725938          | 0.295497           | -3.38413                     | T down vs N                            | 17.37   | 13.92     | 12.8223    | 1         |
| cg04540383                                                     | RASSF1;RASSF1;ZMYND10         | 0.0006571         | 0.0006571            | 3.13751            | 3.13751                      | T up vs N                              | 17.769  | 12.2456   | 11.0265    | 1         |
| cg04540870                                                     | MGMT                          | 4.15E-05          | 4.15E-05             | 0.235764           | -4.24153                     | T down vs N                            | 31.124  | 19.5547   | 10.0526    | 1         |
| cg04543510                                                     | AGXT2                         | 0.00072651        | 0.000726508          | 0.270479           | -3.69715                     | T down vs N                            | 17.367  | 16.0135   | 14.7534    | 1         |
| cg04545636                                                     | CUGBP2;CUGBP2;CUGBP2;CUGBP2   | 0.00059655        | 0.000596549          | 0.239664           | -4.17251                     | T down vs N                            | 18.161  | 19.1132   | 16.8385    | 1         |
| cg04546999                                                     | SPRR1A                        | 0.00052344        | 0.000523435          | 0.253834           | -3.93959                     | T down vs N                            | 18.7    | 17.607    | 15.0648    | 1         |
| cg04547675                                                     | SPON1                         | 2.53E-05          | 2.53E-05             | 17.5479            | 17.5479                      | T up vs N                              | 34.062  | 76.8761   | 36.1116    | 1         |
| cg04548519                                                     | LRRC31                        | 6.45E-06          | 6.45E-06             | 0.232522           | -4.30067                     | T down vs N                            | 43.161  | 19.9313   | 7.3887     | 1         |
| cg04552470                                                     | VWA5B1                        | 0.00019847        | 0.000198468          | 17.9364            | 17.9364                      | T up vs N                              | 22.989  | 78.0557   | 54.3257    | 1         |
| cg04552737                                                     | GLB1L;STK16;STK16             | 0.00076481        | 0.000764813          | 0.195937           | -5.10368                     | T down vs N                            | 17.163  | 24.8838   | 23.1982    | 1         |
| PCDHGA4;PCDHGA6;PCDHGA1;PCDHG<br>A8;PCDHGB5;PCDHGA5;PCDHGB1;PC |                               |                   |                      |                    |                              |                                        |         |           |            |           |
| cg04553690                                                     | DHGB4;PCDHGA3;PCDHGA2;PCDHGB5 | 0.0008439         | 0.000843898          | 4.69095            | 4.69095                      | T up vs N                              | 16.776  | 22.3757   | 21.3408    | 1         |
| cg04554195                                                     | FPR2;FPR2                     | 0.00098245        | 0.000982445          | 0.259675           | -3.85097                     | T down vs N                            | 16.188  | 17.0275   | 16.8298    | 1         |
| cg04554505                                                     | TRPC6                         | 2.17E-05          | 2.17E-05             | 0.27692            | -3.61115                     | T down vs N                            | 35.001  | 15.4422   | 7.059      | 1         |
| cg04554613                                                     | DHRS9;DHRS9;DHRS9;DHRS9       | 2.68E-05          | 2.68E-05             | 0.248303           | -4.02734                     | T down vs N                            | 33.717  | 18.1773   | 8.62589    | 1         |
| cg04556039                                                     | C19orf69                      | 4.62E-05          | 4.62E-05             | 0.309591           | -3.23007                     | T down vs N                            | 30.519  | 12.8763   | 6.75053    | 1         |
| cg04556418                                                     | CDKN2AIP                      | 0.00104172        | 0.00104172           | 0.312338           | -3.20166                     | T down vs N                            | 15.964  | 12.683    | 12.7112    | 1         |
| cg04556766                                                     | RNASE3                        | 1.15E-05          | 1.15E-05             | 0.216605           | -4.6167                      | T down vs N                            | 39.09   | 21.9161   | 8.97048    | 1         |
| cg04557018                                                     | ZIC4;ZIC4;ZIC4                | 0.0027006         | 0.0027006            | 0.298947           | -3.34508                     | T down vs N                            | 12.56   | 13.6562   | 17.3966    | 1         |
| cg04558658                                                     | GPATCH8                       | 0.00104484        | 0.00104484           | 0.332019           | -3.01187                     | T down vs N                            | 15.953  | 11.3859   | 11.4194    | 1         |
| cg04560284                                                     | RNF222                        | 0.00168727        | 0.00168727           | 0.309276           | -3.23336                     | T down vs N                            | 14.188  | 12.8986   | 14.546     | 1         |
| cg04560810                                                     | TMEM173                       | 0.00100469        | 0.00100469           | 0.173251           | -5.77196                     | T down vs N                            | 16.102  | 28.7827   | 28.5998    | 1         |
| cg04561261                                                     | HSD17B2                       | 2.54E-06          | 2.54E-06             | 0.283945           | -3.52181                     | T down vs N                            | 50.33   | 14.8455   | 4.71945    | 1         |
| cg04561571                                                     | UBE2N                         | 7.60E-05          | 7.60E-05             | 0.316115           | -3.16341                     | T down vs N                            | 27.79   | 12.4223   | 7.15212    | 1         |
| cg04562683                                                     | TP73;TP73;TP73;TP73           | 7.95E-06          | 7.95E-06             | 0.056115           | -17.8204                     | T down vs N                            | 41.669  | 77.7053   | 29.8371    | 1         |
| cg04566159                                                     | ACP5;ACP5;ACP5;ACP5;ACP5      | 0.00012316        | 0.000123163          | 5.79623            | -5.79623                     | T up vs N                              | 25.302  | 28.9206   | 18.2883    | 1         |
| cg04566359                                                     | FAM46C                        | 1.43E-05          | 1.43E-05             | 0.192511           | -5.1945                      | T down vs N                            | 37.657  | 25.4252   | 10.8029    | 1         |
| cg04568819                                                     | COL5A1                        | 0.00227692        | 0.00227692           | 0.312849           | -3.19643                     | T down vs N                            | 13.139  | 12.6473   | 15.4014    | 1         |
| cg04571509                                                     | AP4E1                         | 0.0004233         | 0.000423304          | 0.290114           | -3.44692                     | T down vs N                            | 19.594  | 14.343    | 11.7121    | 1         |
| cg04571652                                                     | MGC2889;HRASLS                | 0.00011683        | 0.000116832          | 0.237862           | -4.20411                     | T down vs N                            | 25.567  | 19.3156   | 12.0881    | 1         |
| cg04571965                                                     | C14orf162                     | 2.39E-05          | 2.39E-05             | 0.099353           | -10.0651                     | T down vs N                            | 34.41   | 49.9388   | 23.2208    | 1         |
| cg04573316                                                     | MIR519D                       | 0.00070704        | 0.000707037          | 0.302316           | -3.3078                      | T down vs N                            | 17.475  | 13.4038   | 12.2725    | 1         |
| cg04573661                                                     | AASDH                         | 2.44E-05          | 2.44E-05             | 0.241831           | -4.13513                     | T down vs N                            | 34.272  | 18.8731   | 8.81089    | 1         |
| cg04573872                                                     | CATSPER4                      | 0.00066201        | 0.000662007          | 0.295226           | -3.38724                     | T down vs N                            | 17.739  | 13.9409   | 12.5743    | 1         |
| cg04574507                                                     | CD1B                          | 0.0004437         | 0.000443695          | 0.194631           | -5.13792                     | T down vs N                            | 19.394  | 25.0884   | 20.6981    | 1         |
| cg04575427                                                     | SPINT3                        | 3.31E-08          | 3.31E-08             | 0.254638           | -3.92714                     | T down vs N                            | 97.348  | 17.5258   | 2.88051    | 1         |
| cg04577162                                                     | RFC2;RFC2                     | 0.00018614        | 0.000186142          | 0.292701           | -3.41646                     | T down vs N                            | 23.292  | 14.1379   | 9.7119     | 1         |
| cg04578744                                                     | ITGA8                         | 1.78E-05          | 1.78E-05             | 0.290971           | -3.43677                     | T down vs N                            | 36.243  | 14.2747   | 6.3018     | 1         |
| cg04579632                                                     | ADPRHL1;ADPRHL1               | 7.60E-06          | 7.60E-06             | 0.286951           | -3.48492                     | T down vs N                            | 41.981  | 14.5982   | 5.56371    | 1         |
| cg04580179                                                     | KCNG3;KCNG3                   | 2.16E-05          | 2.16E-05             | 5.96467            | 5.96467                      | T up vs N                              | 35.046  | 29.8712   | 13.6374    | 1         |
| cg04581294                                                     | FGF18                         | 5.10E-06          | 5.10E-06             | 0.323491           | -3.09128                     | T down vs N                            | 44.884  | 11.9297   | 4.25265    | 1         |
| cg04581728                                                     | DNAH8                         | 0.0001227         | 0.000122702          | 0.155816           | -6.41781                     | T down vs N                            | 25.321  | 32.371    | 20.455     | 1         |
| cg04586348                                                     | KIR3DL2                       | 4.06E-05          | 4.06E-05             | 0.186241           | -5.36938                     | T down vs N                            | 31.252  | 26.4575   | 13.5453    | 1         |
| cg04586407                                                     | STX1B                         | 0.00016964        | 0.000169636          | 4.85862            | 4.85862                      | T up vs N                              | 23.735  | 23.404    | 15.7772    | 1         |
| cg04588051                                                     | SBF2                          | 0.00014256        | 0.000142557          | 0.250035           | -3.99944                     | T down vs N                            | 24.578  | 17.9963   | 11.7154    | 1         |
| cg04588257                                                     | FLJ14856                      | 3.35E-05          | 3.35E-05             | 0.166332           | -6.01207                     | T down vs N                            | 32.37   | 30.1366   | 14.8962    | 1         |
| cg04588710                                                     | OR4K17                        | 3.59E-05          | 3.59E-05             | 0.265994           | -3.75948                     | T down vs N                            | 31.964  | 16.4256   | 8.22203    | 1         |
| cg04589062                                                     | CDK14                         | 0.00517701        | 0.00517701           | 0.212312           | -4.71006                     | T down vs N                            | 10.468  | 22.4935   | 34.3799    | 1         |
| cg04590036                                                     | RNASEN;RNASEN                 | 2.66E-05          | 2.66E-05             | 0.264294           | -3.78366                     | T down vs N                            | 33.745  | 16.585    | 7.86382    | 1         |
| cg04590170                                                     | LMO2                          | 0.00014216        | 0.000142161          | 0.300745           | -3.32507                     | T down vs N                            | 24.592  | 13.5208   | 8.79698    | 1         |
| cg04590184                                                     | RNF135;RNF135                 | 0.00482047        | 0.00482047           | 4.71146            | 4.71146                      | T up vs N                              | 10.689  | 22.5021   | 33.6834    | 1         |
| cg04591843                                                     | HS3ST3A1                      | 0.00023289        | 0.000232892          | 0.163207           | -6.1272                      | T down vs N                            | 22.245  | 30.7774   | 22.1375    | 1         |
| cg04592505                                                     | PTPRE                         | 0.00130842        | 0.00130842           | 0.320801           | -3.1172                      | T down vs N                            | 15.111  | 12.1069   | 12.8193    | 1         |
| cg04592958                                                     | KDM4B                         | 0.00049181        | 0.00049181           | 3.48068            | 3.48068                      | T up vs N                              | 18.96   | 14.5698   | 12.2953    | 1         |
| cg04598300                                                     | STAT3;STAT3;STAT3             | 1.42E-07          | 1.42E-07             | 0.272508           | -3.66962                     | T down vs N                            | 78.647  | 15.831    | 3.22068    | 1         |
| cg04598774                                                     | PAX6;PAX6;PAX6                | 2.11E-05          | 2.11E-05             | 3.98754            | 3.98754                      | T up vs N                              | 35.186  | 17.9191   | 8.14826    | 1         |
| cg04600092                                                     | LOC93432                      | 0.00221921        | 0.00221921           | 0.234364           | -4.26687                     | T down vs N                            | 13.227  | 19.7163   | 23.8495    | 1         |
| cg04600618                                                     | RSPH9                         | 0.00087155        | 0.000871549          | 12.9925            | -12.9925                     | T up vs N                              | 17.145  | 57.9689   | 50.7177    | 1         |
| cg04601137                                                     | ADAMTSL5                      | 6.93E-06          | 6.93E-06             | 0.188379           | -5.30846                     | T down vs N                            | 42.65   | 26.0994   | 9.79115    | 1         |
| cg04601228                                                     | AUTS2;AUTS2                   | 6.02E-05          | 6.02E-05             | 0.200912           | -4.97731                     | T down vs N                            | 29.043  | 24.1241   | 13.2901    | 1         |
| cg04603130                                                     | GNG7                          | 0.00383192        | 0.00383192           | 0.264396           | -3.78221                     | T down vs N                            | 11.413  | 16.5755   | 23.238     | 1         |
| cg04603355                                                     | ZNF599                        | 0.00147828        | 0.00147828           | 0.21567            | -4.63671                     | T down vs N                            | 14.664  | 22.0402   | 24.0482    | 1         |
| cg04604142                                                     | LUC7L3;LUC7L3                 | 0.00034225        | 0.000342249          | 0.195145           | -5.12441                     | T down vs N                            | 20.514  | 25.0077   | 19.5052    | 1         |
| cg04605987                                                     | NR5A2;NR5A2                   | 0.00015328        | 0.000153279          | 0.292162           | -3.42276                     | T down vs N                            | 24.224  | 14.1804   | 9.36614    | 1         |
| cg04608190                                                     | PRR21                         | 0.00107039        | 0.00107039           | 0.309461           | -3.23143                     | T down vs N                            | 15.861  | 12.8855   | 12.9981    | 1         |
| cg04608829                                                     | CYP4F12                       | 3.89E-05          | 3.89E-05             | 0.192398           | -5.19755                     | T down vs N                            | 31.507  | 25.4434   | 12.9209    | 1         |

| Probeset ID                                                                                                                                                          | UCSC_REFGENE_NAME             | p-value<br>(Type) | p-value (T vs.<br>N) | Ratio (T<br>vs. N) | Fold-<br>Change (T<br>vs. N) | Fold-Change (T vs.<br>N) (Description) | F(Type) | SS (Type) | SS (Error) | F (Error) |
|----------------------------------------------------------------------------------------------------------------------------------------------------------------------|-------------------------------|-------------------|----------------------|--------------------|------------------------------|----------------------------------------|---------|-----------|------------|-----------|
| cg04609635                                                                                                                                                           | C2orf84                       | 0.00096439        | 0.00096439           | 0.273343           | -3.6584                      | T down vs N                            | 16.259  | 15.7565   | 15.5054    | 1         |
| cg04609640                                                                                                                                                           | BEI3                          | 4.97E-05          | 4.97E-05             | 0.246451           | -4.0576                      | T down vs N                            | 30.102  | 18.3732   | 9.76581    | 1         |
| cg04610601                                                                                                                                                           | LST4                          | 0.00012394        | 0.000123935          | 0.310668           | -3.21887                     | T down vs N                            | 25.271  | 12.8001   | 8.10429    | 1         |
| cg04610718                                                                                                                                                           | ASCL1                         | 4.06E-05          | 4.06E-05             | 0.302915           | -3.30126                     | T down vs N                            | 31.261  | 13.3596   | 6.83775    | 1         |
| cg04615865<br>cg04617549<br>cg04618331<br>cg04619304<br>cg04619381<br>cg04621521<br>cg04622200<br>cg04623131<br>cg04623837<br>cg04625493<br>cg04625528<br>cg04625975 | CAMKK2;CAMKK2;CAMKK2;CAMKK2;C |                   |                      |                    |                              |                                        |         |           |            |           |
|                                                                                                                                                                      | AMKK2                         | 6.69E-07          | 6.69E-07             | 0.125137           | -7.99121                     | T down vs N                            | 62.178  | 40.4572   | 10.4108    | 1         |
|                                                                                                                                                                      | KLK13                         | 0.000357          | 0.000356999          | 0.304275           | -3.2865                      | T down vs N                            | 20.329  | 13.2595   | 10.4359    | 1         |
|                                                                                                                                                                      | RPS6KA4;RPS6KA4               | 0.00049487        | 0.000494867          | 4.72537            | 4.72537                      | T up vs N                              | 18.934  | 22.5878   | 19.0877    | 1         |
|                                                                                                                                                                      | SOX5                          | 2.89E-05          | 2.89E-05             | 0.303706           | -3.29265                     | T down vs N                            | 33.247  | 13.3012   | 6.40125    | 1         |
|                                                                                                                                                                      | PRR15                         | 6.74E-06          | 6.74E-06             | 10.0511            | 10.0511                      | T up vs N                              | 42.849  | 49.8787   | 18.6247    | 1         |
|                                                                                                                                                                      | CYP3A7;CYP3A7                 | 6.10E-05          | 6.10E-05             | 0.261063           | -3.8305                      | T down vs N                            | 28.973  | 16.8931   | 9.32896    | 1         |
|                                                                                                                                                                      | ADAMTS17                      | 0.00401698        | 0.00401698           | 0.258815           | -3.86376                     | T down vs N                            | 11.262  | 17.1113   | 24.31      | 1         |
|                                                                                                                                                                      | FAM178B;FAM178B               | 1.80E-05          | 1.80E-05             | 0.309348           | -3.2326                      | T down vs N                            | 36.173  | 12.8935   | 5.7031     | 1         |
|                                                                                                                                                                      | HCG9                          | 2.40E-05          | 2.40E-05             | 12.7418            | 12.7418                      | T up vs N                              | 34.37   | 60.6596   | 28.2385    | 1         |
|                                                                                                                                                                      | VSIG4;VSIG4                   | 3.98E-05          | 3.98E-05             | 0.185031           | -5.40451                     | T down vs N                            | 31.376  | 26.6632   | 13.5966    | 1         |
|                                                                                                                                                                      | GRPR                          | 3.24E-05          | 3.24E-05             | 0.314768           | -3.17694                     | T down vs N                            | 32.565  | 12.5146   | 6.14883    | 1         |
|                                                                                                                                                                      | HNRNPA3P1                     | 0.00075517        | 0.000755167          | 0.27435            | -3.64497                     | T down vs N                            | 17.213  | 15.6673   | 14.5633    | 1         |
|                                                                                                                                                                      |                               |                   |                      |                    |                              |                                        |         |           |            |           |
| cg04628369                                                                                                                                                           | PMEPA1;PMEPA1;PMEPA1;PMEPA1   | 0.00110176        | 0.00110176           | 0.234011           | -4.2733                      | T down vs N                            | 15.752  | 19.7572   | 20.068     | 1         |
| cg04632683                                                                                                                                                           | PRPF31;TFPT                   | 0.0035185         | 0.0035185            | 0.302681           | -3.3038                      | T down vs N                            | 11.688  | 13.3768   | 18.3125    | 1         |
| cg04633141                                                                                                                                                           | TMEM184A                      | 0.00038742        | 0.000387419          | 0.208607           | -4.7937                      | T down vs N                            | 19.974  | 23.0074   | 18.4296    | 1         |
| cg04635277<br>cg04636672<br>cg04637219<br>cg04637372                                                                                                                 | TCF7L2;TCF7L2;TCF7L2;TCF7L2   |                   |                      |                    |                              |                                        |         |           |            |           |
|                                                                                                                                                                      | ;TCF7L2                       | 3.15E-06          | 3.15E-06             | 0.259883           | -3.84789                     | T down vs N                            | 48.601  | 17.0073   | 5.59904    | 1         |
|                                                                                                                                                                      | ZNF267                        | 0.00020076        | 0.000200758          | 3.48804            | 3.48804                      | T up vs N                              | 22.935  | 14.6192   | 10.1987    | 1         |
|                                                                                                                                                                      | CXorf30                       | 1.62E-05          | 1.62E-05             | 0.200949           | -4.9764                      | T down vs N                            | 36.867  | 24.1186   | 10.4673    | 1         |
|                                                                                                                                                                      | VWA5B1;VWA5B1                 | 5.65E-07          | 5.65E-07             | 0.249968           | -4.00051                     | T down vs N                            | 63.818  | 18.0033   | 4.51368    | 1         |
|                                                                                                                                                                      |                               |                   |                      |                    |                              |                                        |         |           |            |           |
|                                                                                                                                                                      | PCDHGA4;PCDHGA1;PCDHGA6;PCDHG |                   |                      |                    |                              |                                        |         |           |            |           |
|                                                                                                                                                                      | A5;PCDHGB1;PCDHGA3;PCDHGA6;PC |                   |                      |                    |                              |                                        |         |           |            |           |
| cg04637478                                                                                                                                                           | DHGA2;PCDHGB2;PCDHGB3         | 0.00042845        | 0.000428452          | 5.26025            | 5.26025                      | T up vs N                              | 19.542  | 25.8149   | 21.1355    | 1         |
| cg04643969                                                                                                                                                           | OTUB1;OTUB1                   | 2.10E-05          | 2.10E-05             | 0.190835           | -5.24012                     | T down vs N                            | 35.203  | 25.6959   | 11.679     | 1         |
| cg04645174                                                                                                                                                           | OR7A17                        | 0.00079848        | 0.00079848           | 0.214565           | -4.66058                     | T down vs N                            | 16.993  | 22.188    | 20.8918    | 1         |
| cg04647241                                                                                                                                                           | KRT12                         | 0.00017097        | 0.000170969          | 0.287245           | -3.48135                     | T down vs N                            | 23.697  |           |            |           |

| Probeset ID | UCSC_REFGENE_NAME                   | p-value<br>(Type) | p-value (T vs.<br>N) | Ratio (T<br>vs. N) | Fold-<br>Change (T<br>vs. N) | Fold-Change (T vs.<br>N) (Description) | F(Type) | SS (Type) | SS (Error) | F (Error) |
|-------------|-------------------------------------|-------------------|----------------------|--------------------|------------------------------|----------------------------------------|---------|-----------|------------|-----------|
| cg04719215  | GPR139                              | 0.00170132        | 0.00170132           | 0.330222           | -3.02827                     | T down vs N                            | 14.158  | 11.4983   | 12.994     | 1         |
| cg04719574  | LOC257358                           | 6.94E-06          | 6.94E-06             | 0.243849           | -4.10089                     | T down vs N                            | 42.636  | 18.6527   | 6.99988    | 1         |
|             | ZNF135;ZNF135;ZNF135;ZNF135;ZNF135  |                   |                      |                    |                              |                                        |         |           |            |           |
| cg04719949  | 35                                  | 0.00295705        | 0.00295705           | 3.28647            | 3.28647                      | T up vs N                              | 12.257  | 13.2593   | 17.3079    | 1         |
| cg04720596  | FSD1                                | 1.86E-05          | 1.86E-05             | 0.23661            | -4.22636                     | T down vs N                            | 35.99   | 19.4579   | 8.65048    | 1         |
| cg04721098  | CACNG3                              | 0.00374292        | 0.00374292           | 0.328749           | -3.04184                     | T down vs N                            | 11.488  | 11.5913   | 16.1438    | 1         |
| cg04721828  | OR4X1                               | 4.23E-05          | 4.23E-05             | 0.300843           | -3.32399                     | T down vs N                            | 31.022  | 13.5135   | 6.9697     | 1         |
| cg04722610  | ANKRD36BL1                          | 0.00695751        | 0.00695751           | 3.4371             | 3.4371                       | T up vs N                              | 9.5768  | 14.2769   | 23.8525    | 1         |
| cg04724735  | EVISL;EVISL                         | 1.92E-05          | 1.92E-05             | 14.2412            | 14.2412                      | T up vs N                              | 35.782  | 66.0789   | 29.5477    | 1         |
| cg04726200  | SLC22A18;SLC22A18                   | 0.00208949        | 0.00208949           | 3.598              | 3.598                        | T up vs N                              | 13.435  | 15.3546   | 18.2855    | 1         |
| cg04726374  | PTRF                                | 4.25E-05          | 4.25E-05             | 0.318676           | -3.13798                     | T down vs N                            | 31      | 12.2488   | 6.32201    | 1         |
| cg04728296  | CPE                                 | 0.00012378        | 0.00012378           | 4.21502            | 4.21502                      | T up vs N                              | 25.277  | 19.3854   | 12.2707    | 1         |
| cg04730443  | MAGEB6                              | 0.00304132        | 0.00304132           | 0.29357            | -3.40634                     | T down vs N                            | 12.164  | 14.0697   | 18.5063    | 1         |
| cg04730794  | DOCK2                               | 2.21E-06          | 2.21E-06             | 0.218321           | -4.58041                     | T down vs N                            | 51.494  | 21.6905   | 6.73959    | 1         |
| cg04730930  | LILRB1;LILRB1;LILRB1;LILRB1         | 0.000237          | 0.000236996          | 0.267609           | -3.7368                      | T down vs N                            | 22.164  | 16.2759   | 11.7494    | 1         |
| cg04731518  | PQLC3                               | 0.00061354        | 0.000613542          | 0.288181           | -3.47005                     | T down vs N                            | 18.047  | 14.4984   | 12.854     | 1         |
| cg04736911  | TEX261                              | 4.18E-05          | 4.18E-05             | 0.191971           | -5.20911                     | T down vs N                            | 31.082  | 25.512    | 13.1327    | 1         |
| cg04737124  | VTIAA                               | 0.00438644        | 0.00438644           | 0.272833           | -3.66525                     | T down vs N                            | 10.984  | 15.8019   | 23.0188    | 1         |
| cg04740359  | NTF3;NTF3                           | 0.00054413        | 0.000544129          | 0.273961           | -3.65015                     | T down vs N                            | 18.539  | 15.7017   | 13.5511    | 1         |
| cg04741211  | EML4;EML4                           | 6.00E-05          | 6.00E-05             | 0.169269           | -5.90776                     | T down vs N                            | 29.061  | 29.5514   | 16.27      | 1         |
| cg04741880  | KLK3;KLK3;KLK3;KLK3                 | 1.63E-05          | 1.63E-05             | 0.289042           | -3.4597                      | T down vs N                            | 36.812  | 14.4289   | 6.27147    | 1         |
| cg04742334  | LOC339568                           | 7.51E-05          | 7.51E-05             | 0.212291           | -4.71051                     | T down vs N                            | 27.852  | 22.4963   | 12.9234    | 1         |
| cg04742384  | CBLN4                               | 0.00360887        | 0.00360887           | 0.269969           | -3.70413                     | T down vs N                            | 11.606  | 16.0597   | 22.1408    | 1         |
| cg04743654  | RASSF1;RASSF1;RASSF1;RASSF1         | 1.25E-05          | 1.25E-05             | 23.4469            | 23.4469                      | T up vs N                              | 38.535  | 93.2156   | 38.7035    | 1         |
|             | PAX8;PAX8;PAX8;PAX8;PAX8;LOC4408    |                   |                      |                    |                              |                                        |         |           |            |           |
| cg04746199  | 39                                  | 0.00197983        | 0.00197983           | 4.12495            | 4.12495                      | T up vs N                              | 13.623  | 18.8076   | 22.089     | 1         |
| cg04747619  | DEFA5                               | 4.84E-06          | 4.84E-06             | 0.246166           | -4.06229                     | T down vs N                            | 45.28   | 18.4035   | 6.50301    | 1         |
| cg04748546  | TRPM4                               | 2.09E-05          | 2.09E-05             | 0.257686           | -3.88069                     | T down vs N                            | 35.231  | 17.2222   | 7.8213     | 1         |
| cg04753936  | LILRB1;LILRB1;LILRB1;LILRB1         | 0.00012711        | 0.000127107          | 0.190122           | -5.25978                     | T down vs N                            | 25.145  | 25.8122   | 16.4247    | 1         |
| cg04754776  | ZNRD1;ZNRD1                         | 0.00705197        | 0.00705197           | 0.297649           | -3.35966                     | T down vs N                            | 9.537   | 13.7548   | 23.076     | 1         |
| cg04755571  | KCNK17;KCNK17                       | 0.00217494        | 0.00217494           | 3.07639            | 3.07639                      | T up vs N                              | 13.297  | 11.8279   | 14.2326    | 1         |
| cg04756296  | ERI1                                | 0.00028088        | 0.000280883          | 0.269703           | -3.70779                     | T down vs N                            | 21.392  | 16.0839   | 12.0302    | 1         |
| cg04761722  | GRIN2A;GRIN2A;GRIN2A                | 5.21E-06          | 5.21E-06             | 7.00043            | 7.00043                      | T up vs N                              | 44.737  | 35.4678   | 12.6848    | 1         |
| cg04762351  | OLAH;OLAH                           | 0.00242226        | 0.00242226           | 0.240491           | -4.15817                     | T down vs N                            | 12.927  | 19.0211   | 23.542     | 1         |
| cg04764056  | CLC                                 | 2.11E-05          | 2.11E-05             | 0.251338           | -3.9787                      | T down vs N                            | 35.174  | 17.8616   | 8.12484    | 1         |
|             | CACNB2;CACNB2;CACNB2;CACNB2;CA      |                   |                      |                    |                              |                                        |         |           |            |           |
|             | CNB2;CACNB2;CACNB2;CACNB2;CACN      |                   |                      |                    |                              |                                        |         |           |            |           |
| cg04764839  | B2                                  | 0.00103454        | 0.00103454           | 0.321152           | -3.11379                     | T down vs N                            | 15.991  | 12.0836   | 12.0906    | 1         |
| cg04765195  | PNPLA1;PNPLA1                       | 0.00031825        | 0.00031825           | 0.23916            | -4.18131                     | T down vs N                            | 20.834  | 19.1696   | 14.7217    | 1         |
| cg04768368  | TACC2;TACC2                         | 4.11E-05          | 4.11E-05             | 4.13474            | 4.13474                      | T up vs N                              | 31.181  | 18.8706   | 9.68319    | 1         |
| cg04768958  | LCLAT1;LCLAT1                       | 6.65E-05          | 6.65E-05             | 0.159798           | -6.25792                     | T down vs N                            | 28.505  | 31.4984   | 17.6802    | 1         |
| cg04772948  | LOC284788;LOC284788                 | 0.00136999        | 0.00136999           | 0.307584           | -3.25115                     | T down vs N                            | 14.942  | 13.0195   | 13.9417    | 1         |
| cg04774930  | CHP2                                | 4.57E-05          | 4.57E-05             | 0.164796           | -6.06811                     | T down vs N                            | 30.583  | 30.4492   | 15.9302    | 1         |
| cg04774951  | IL1RAPL2;TEX13A                     | 1.66E-06          | 1.66E-06             | 0.21594            | -4.63092                     | T down vs N                            | 53.878  | 22.0043   | 6.53462    | 1         |
| cg04775232  | PRC1;PRC1;PRC1                      | 0.00044224        | 0.000442241          | 0.270309           | -3.69947                     | T down vs N                            | 19.408  | 16.0289   | 13.2145    | 1         |
| cg04775710  | IER3                                | 0.00125634        | 0.00125634           | 7.6224             | 7.6224                       | T up vs N                              | 15.261  | 38.6385   | 40.5094    | 1         |
| cg04776470  | SYNJ2                               | 0.0057257         | 0.0057257            | 0.324033           | -3.08611                     | T down vs N                            | 10.16   | 11.8944   | 18.7306    | 1         |
| cg04777824  | ACACB                               | 5.09E-05          | 5.09E-05             | 0.332326           | -3.00909                     | T down vs N                            | 29.978  | 11.3668   | 6.0667     | 1         |
| cg04778012  | STAG3;GPC2                          | 0.00532208        | 0.00532208           | 3.46768            | 3.46768                      | T up vs N                              | 10.383  | 14.4825   | 22.3165    | 1         |
| cg04778178  | HOXA3                               | 0.0039085         | 0.0039085            | 7.68855            | 7.68855                      | T up vs N                              | 11.349  | 38.968    | 54.9359    | 1         |
| cg04778236  | SPSB1                               | 0.00419528        | 0.00419528           | 0.257589           | -3.88215                     | T down vs N                            | 11.124  | 17.2318   | 24.7844    | 1         |
| cg04779752  | CLDN4;CLDN4                         | 0.00095152        | 0.000951516          | 4.0378             | 4.0378                       | T up vs N                              | 16.311  | 18.2451   | 17.8975    | 1         |
| cg04781494  | CASP10;CASP10;CASP10                | 1.52E-05          | 1.52E-05             | 0.237955           | -4.20247                     | T down vs N                            | 37.286  | 19.3051   | 8.28412    | 1         |
| cg04783977  | UPK1A                               | 6.33E-05          | 6.33E-05             | 0.329388           | -3.03593                     | T down vs N                            | 28.774  | 11.5508   | 6.42291    | 1         |
| cg04784101  | RHOD                                | 2.74E-05          | 2.74E-05             | 12.2981            | 12.2981                      | T up vs N                              | 33.582  | 58.9815   | 28.1012    | 1         |
| cg04784251  | BCAS3;BCAS3                         | 2.07E-07          | 2.07E-07             | 0.149697           | -6.68014                     | T down vs N                            | 74.346  | 33.7812   | 7.27008    | 1         |
| cg04784620  | EIF3L;MIR659                        | 0.00031056        | 0.00031056           | 0.223391           | -4.47646                     | T down vs N                            | 20.943  | 21.0411   | 16.0753    | 1         |
| cg04785187  | CCDC85C                             | 0.00017125        | 0.00017125           | 0.307692           | -3.25001                     | T down vs N                            | 23.689  | 13.0118   | 8.78836    | 1         |
| cg04785213  | LYZ                                 | 9.75E-06          | 9.75E-06             | 0.273829           | -3.65192                     | T down vs N                            | 40.242  | 15.7134   | 6.24753    | 1         |
| cg04786592  | DHRS12;DHRS12                       | 0.00043946        | 0.000439461          | 0.264776           | -3.77677                     | T down vs N                            | 19.435  | 16.5397   | 13.6168    | 1         |
| cg04786857  | SPDYA;SPDYA                         | 0.00194109        | 0.00194109           | 9.79173            | 9.79173                      | T up vs N                              | 13.692  | 48.7548   | 56.9719    | 1         |
| cg04787024  | C2orf55                             | 0.00010459        | 0.000104586          | 31.9901            | 31.9901                      | T up vs N                              | 26.128  | 112.48    | 68.8808    | 1         |
|             | PCSK6;PCSK6;PCSK6;PCSK6;PCSK6;PCSK6 |                   |                      |                    |                              |                                        |         |           |            |           |
| cg04789225  | K6;PCSK6;PCSK6                      | 0.00039997        | 0.000399974          | 0.279813           | -3.57382                     | T down vs N                            | 19.837  | 15.1933   | 12.2546    | 1         |
| cg04790749  | MMP28;MMP28                         | 0.00016394        | 0.000163938          | 0.161286           | -6.20018                     | T down vs N                            | 23.899  | 31.1808   | 20.8752    | 1         |
| cg04791060  | MICB                                | 3.81E-06          | 3.81E-06             | 0.274209           | -3.64686                     | T down vs N                            | 47.103  | 15.6798   | 5.32612    | 1         |
| cg04793268  | OVCH2                               | 0.00031887        | 0.000318868          | 0.299466           | -3.33928                     | T down vs N                            | 20.826  | 13.6169   | 10.4618    | 1         |
| cg04794372  | KIAA1407                            | 0.00024127        | 0.00024127           | 0.258417           | -3.86972                     | T down vs N                            | 22.082  | 17.1504   | 12.4267    | 1         |
| cg04795662  | TDO2;TDO2                           | 0.00034592        | 0.000345919          | 0.314217           | -3.18252                     | T down vs N                            | 20.467  | 12.5526   | 9.81296    | 1         |
| cg04797061  | PRSS36                              | 0.0027787         | 0.0027787            | 3.31193            | 3.31193                      | T up vs N                              | 12.464  | 13.4318   | 17.2419    | 1         |
| cg04798684  | PRPSAP1                             | 2.94E-06          | 2.94E-06             | 0.207848           | -4.81122                     | T down vs N                            | 49.147  | 23.1146   | 7.525      | 1         |
| cg04801779  | GDPD4                               | 0.00341538        | 0.00341538           | 0.246876           | -4.05062                     | T down vs N                            | 11.784  | 18.3281   | 24.8851    | 1         |

| Probeset ID                                                                             | UCSC_REFGENE_NAME             | p-value<br>(Type) | p-value (T vs.<br>N) | Ratio (T<br>vs. N) | Fold-<br>Change (T<br>vs. N) | Fold-Change (T vs.<br>N) (Description) | F(Type) | SS (Type) | SS (Error) | F (Error) |
|-----------------------------------------------------------------------------------------|-------------------------------|-------------------|----------------------|--------------------|------------------------------|----------------------------------------|---------|-----------|------------|-----------|
| cg04802210                                                                              | C1QTNF9                       | 9.70E-06          | 9.70E-06             | 0.309246           | -3.23368                     | T down vs N                            | 40.277  | 12.9008   | 5.12486    | 1         |
| cg04802386                                                                              | NHEDC2                        | 0.00420109        | 0.00420109           | 0.274574           | -3.642                       | T down vs N                            | 11.12   | 15.6475   | 22.5146    | 1         |
| cg04804139                                                                              | NCOR2;NCOR2                   | 2.41E-05          | 2.41E-05             | 4.79035            | 4.79035                      | T up vs N                              | 34.344  | 22.9869   | 10.7091    | 1         |
| cg04804539                                                                              | MAL;MAL;MAL;MAL               | 0.00594645        | 0.00594645           | 6.81624            | 6.81624                      | T up vs N                              | 10.046  | 34.5025   | 54.9519    | 1         |
| cg04804648                                                                              | KIF19                         | 0.00045229        | 0.000452289          | 7.75378            | 7.75378                      | T up vs N                              | 19.313  | 39.2914   | 32.5522    | 1         |
| cg04807470                                                                              | TNNC2                         | 4.54E-06          | 4.54E-06             | 26.0976            | 26.0976                      | T up vs N                              | 45.769  | 99.6524   | 34.8369    | 1         |
| cg04809380                                                                              | CACNA1H;CACNA1H               | 0.00010998        | 0.000109977          | 0.196321           | -5.0937                      | T down vs N                            | 25.872  | 24.824    | 15.352     | 1         |
| cg04810755                                                                              | MST1P9                        | 6.51E-05          | 6.51E-05             | 3.22653            | 3.22653                      | T up vs N                              | 28.618  | 12.8522   | 7.18543    | 1         |
| cg04812644                                                                              | LOC286094                     | 0.00126743        | 0.00126743           | 0.307806           | -3.2488                      | T down vs N                            | 15.229  | 13.0035   | 13.6623    | 1         |
| cg04815334                                                                              | NADSYN1                       | 3.64E-05          | 3.64E-05             | 0.165592           | -6.03893                     | T down vs N                            | 31.896  | 30.2866   | 15.1928    | 1         |
| cg04815371                                                                              | AKAP6                         | 0.00035408        | 0.000354081          | 0.219976           | -4.54595                     | T down vs N                            | 21.066  | 20.2125   | 14.3921    | 1         |
| cg04816394                                                                              | RNU5E;RNU5D;CKMT2;CKMT2;CKMT2 | 1.78E-05          | 1.78E-05             | 5.32677            | 5.32677                      | T up vs N                              | 36.257  | 26.2072   | 11.5651    | 1         |
| cg04824378                                                                              | TRPM7                         | 4.32E-05          | 4.32E-05             | 0.204719           | -4.88474                     | T down vs N                            | 30.895  | 23.5631   | 12.2028    | 1         |
| cg04825215                                                                              | MICB                          | 0.00096961        | 0.000969612          | 8.02305            | 8.02305                      | T up vs N                              | 16.238  | 40.6122   | 40.0161    | 1         |
| cg04831795                                                                              | SEMA3C                        | 5.52E-05          | 5.52E-05             | 0.331688           | -3.01488                     | T down vs N                            | 29.519  | 11.4065   | 6.18271    | 1         |
| cg04833050                                                                              | LHFPL2                        | 7.88E-05          | 7.88E-05             | 3.91857            | 3.91857                      | T up vs N                              | 27.598  | 17.4699   | 10.1282    | 1         |
| cg04834204                                                                              | ANTXR1                        | 0.00017953        | 0.000179529          | 0.28628            | -3.49309                     | T down vs N                            | 23.464  | 14.653    | 9.99202    | 1         |
| cg04834436                                                                              | IRX6                          | 9.80E-05          | 9.80E-05             | 8.92148            | 8.92148                      | T up vs N                              | 26.46   | 44.8579   | 27.1252    | 1         |
| cg04834956                                                                              | STK32A;STK32A                 | 3.72E-08          | 3.72E-08             | 0.21532            | -4.64426                     | T down vs N                            | 95.716  | 22.087    | 3.69209    | 1         |
| cg04835613                                                                              | APOBEC3C;APOBEC3C             | 1.79E-05          | 1.79E-05             | 0.285444           | -3.50331                     | T down vs N                            | 36.218  | 14.7216   | 6.50348    | 1         |
| cg04836492                                                                              | LOTZT11                       | 2.58E-05          | 2.58E-05             | 0.263537           | -3.79454                     | T down vs N                            | 33.951  | 16.6567   | 7.84986    | 1         |
| cg04837455                                                                              | CDK14                         | 3.69E-06          | 3.69E-06             | 0.235049           | -4.25443                     | T down vs N                            | 47.348  | 19.637    | 6.63586    | 1         |
| cg04837494                                                                              | GC                            | 0.00085368        | 0.000853677          | 0.252168           | -3.96561                     | T down vs N                            | 17.823  | 15.8013   | 12.4118    | 1         |
| cg04838832                                                                              | ADAMTS14;ADAMTS14             | 8.97E-06          | 8.97E-06             | 0.055856           | -17.9033                     | T down vs N                            | 40.821  | 77.9558   | 30.5549    | 1         |
| cg04839289                                                                              | JPH4;JPH4                     | 0.00025788        | 0.000257877          | 5.56442            | 5.56442                      | T up vs N                              | 21.778  | 27.5927   | 20.272     | 1         |
| cg04841371                                                                              | SPRR1A                        | 4.49E-06          | 4.49E-06             | 0.188958           | -5.29217                     | T down vs N                            | 45.849  | 26.0034   | 9.07444    | 1         |
| cg04844495                                                                              | TOR3A                         | 1.53E-06          | 1.53E-06             | 0.322534           | -3.10045                     | T down vs N                            | 54.605  | 11.9924   | 3.51392    | 1         |
| cg04845236                                                                              | RNF20                         | 0.00025804        | 0.000258038          | 0.331027           | -3.0209                      | T down vs N                            | 21.775  | 11.4478   | 8.41166    | 1         |
| cg04845466                                                                              | KRTCAP3;NRBP1;KRTCAP3         | 2.01E-05          | 2.01E-05             | 4.17414            | 4.17414                      | T up vs N                              | 35.487  | 19.1236   | 8.62223    | 1         |
| cg04845649                                                                              | HSF4;HSF4                     | 6.94E-05          | 6.94E-05             | 4.06319            | 4.06319                      | T up vs N                              | 28.278  | 18.4093   | 10.4163    | 1         |
| PCDHGA4;PCDHGA11;PCDHGA9;PCDHGA1;PCDHGB1;PCDHGB6;PCDHGB3;PCDHGA11;PCDHGB7;PCDHGA6;PCDHG |                               |                   |                      |                    |                              |                                        |         |           |            |           |

| Probeset ID                         | UCSC_REFGENE_NAME          | p-value<br>(Type) | p-value (T vs.<br>N) | Ratio (T<br>vs. N) | Fold-<br>Change (T<br>vs. N) | Fold-Change (T vs.<br>N) (Description) | F(Type) | SS (Type) | SS (Error) | F (Error) |
|-------------------------------------|----------------------------|-------------------|----------------------|--------------------|------------------------------|----------------------------------------|---------|-----------|------------|-----------|
| cg04896191                          | MRT04                      | 7.16E-06          | 7.16E-06             | 0.263274           | -3.79833                     | T down vs N                            | 42.411  | 16.6816   | 6.29328    | 1         |
| cg04896832                          | CASZ1;CASZ1                | 7.41E-05          | 7.41E-05             | 0.170013           | -5.88192                     | T down vs N                            | 27.923  | 29.4057   | 16.8497    | 1         |
| cg04897804                          | SOX30;SOX30                | 9.39E-05          | 9.39E-05             | 4.44995            | 4.44995                      | T up vs N                              | 26.68   | 20.8746   | 12.5187    | 1         |
| cg04898695                          | CHD5                       | 0.00013782        | 0.000137821          | 10.0399            | 10.0399                      | T up vs N                              | 24.744  | 49.8303   | 32.2211    | 1         |
| cg04898939                          | LOC595101                  | 1.83E-06          | 1.83E-06             | 0.184949           | -5.4069                      | T down vs N                            | 53.038  | 26.6772   | 8.04772    | 1         |
| cg04899300                          | PKD2L2                     | 0.00539728        | 0.00539728           | 4.15135            | 4.15135                      | T up vs N                              | 10.34   | 18.9774   | 29.3643    | 1         |
| cg04899563                          | KNDC1                      | 0.0001945         | 0.000194503          | 0.27988            | -3.57296                     | T down vs N                            | 23.084  | 15.1875   | 10.5268    | 1         |
| cg04899681                          | NAGPA                      | 0.00063215        | 0.000632151          | 0.258214           | -3.87276                     | T down vs N                            | 17.926  | 17.1703   | 15.3259    | 1         |
| cg04900872                          | SRD5A2                     | 3.06E-05          | 3.06E-05             | 0.205364           | -4.86941                     | T down vs N                            | 32.921  | 23.4697   | 11.4067    | 1         |
| cg04902327                          | TRIM58                     | 0.00013747        | 0.000137465          | 0.201813           | -4.95508                     | T down vs N                            | 24.757  | 23.9898   | 15.5042    | 1         |
| cg04903089                          | HLA-DMB                    | 0.00014441        | 0.000144414          | 0.331757           | -3.01426                     | T down vs N                            | 24.515  | 11.4023   | 7.44191    | 1         |
| cg04904276                          | TXNDC11                    | 0.0005062         | 0.000506201          | 0.195727           | -5.10916                     | T down vs N                            | 18.839  | 24.9166   | 21.1614    | 1         |
| cg04904318                          | HOXB1                      | 3.47E-05          | 3.47E-05             | 50.8597            | 50.8597                      | T up vs N                              | 32.164  | 144.591   | 71.9259    | 1         |
| cg04906575                          | TMEM195                    | 0.00356362        | 0.00356362           | 0.277557           | -3.60287                     | T down vs N                            | 11.646  | 15.387    | 21.1391    | 1         |
| cg04907257                          | ADCY2                      | 5.24E-05          | 5.24E-05             | 4.03327            | 4.03327                      | T up vs N                              | 29.811  | 18.2157   | 9.77676    | 1         |
| cg04908625                          | ADCY5                      | 3.96E-05          | 3.96E-05             | 4.4076             | 4.4076                       | T up vs N                              | 31.396  | 20.6081   | 10.5022    | 1         |
| MIR17HG;MIR92A1;MIR17HG;MIR20A      |                            |                   |                      |                    |                              |                                        |         |           |            |           |
| cg04908961                          | ;MIR19B1                   | 4.74E-05          | 4.74E-05             | 0.258083           | -3.87472                     | T down vs N                            | 30.371  | 17.1831   | 9.0523     | 1         |
| cg04909938                          | LOC93622                   | 0.00395773        | 0.00395773           | 5.26889            | 5.26889                      | T up vs N                              | 11.309  | 25.866    | 36.5939    | 1         |
| cg04910179                          | DAB1                       | 9.98E-06          | 9.98E-06             | 0.278233           | -3.5941                      | T down vs N                            | 40.082  | 15.3286   | 6.1189     | 1         |
| cg04911005                          | LXN;GFM1                   | 0.00029245        | 0.000292448          | 3.42443            | 3.42443                      | T up vs N                              | 21.21   | 14.1916   | 10.7054    | 1         |
| cg04911819                          | KIAA1217;KIAA1217;KIAA1217 | 1.65E-05          | 1.65E-05             | 0.185442           | -5.39252                     | T down vs N                            | 36.749  | 26.5931   | 11.5783    | 1         |
| cg04912982                          | EBF3                       | 0.00074845        | 0.000748445          | 0.301814           | -3.3133                      | T down vs N                            | 17.248  | 13.4411   | 12.4683    | 1         |
| cg04913114                          | SMOC1;SMOC1                | 0.00079316        | 0.000793161          | 0.288385           | -3.46759                     | T down vs N                            | 17.019  | 14.4819   | 13.6148    | 1         |
| cg04916523                          | PIK3R5                     | 0.00018182        | 0.000181823          | 3.6368             | 3.6368                       | T up vs N                              | 23.403  | 15.6129   | 10.674     | 1         |
| cg04917409                          | TPTE;TPTE;TPTE             | 2.52E-05          | 2.52E-05             | 0.265815           | -3.76202                     | T down vs N                            | 34.08   | 16.4424   | 7.71934    | 1         |
| cg04918002                          | FBXO31                     | 0.00024092        | 0.000240915          | 0.291914           | -3.42567                     | T down vs N                            | 22.089  | 14.2      | 10.2857    | 1         |
| cg04918175                          | PODN                       | 7.77E-05          | 7.77E-05             | 0.316442           | -3.16014                     | T down vs N                            | 27.672  | 12.4      | 7.16977    | 1         |
| cg04918314                          | KRT75                      | 0.00452856        | 0.00452856           | 0.259088           | -3.85969                     | T down vs N                            | 10.884  | 17.0847   | 25.1162    | 1         |
| cg04921068                          | PPM1L                      | 8.68E-06          | 8.68E-06             | 0.255347           | -3.91624                     | T down vs N                            | 41.049  | 17.4547   | 6.80345    | 1         |
| cg04923174                          | OR10X1                     | 5.78E-05          | 5.78E-05             | 0.183441           | -5.45134                     | T down vs N                            | 29.271  | 26.9366   | 14.7241    | 1         |
| cg04923845                          | VT1A                       | 7.49E-07          | 7.49E-07             | 0.163148           | -6.12941                     | T down vs N                            | 61.091  | 30.7896   | 8.06398    | 1         |
| cg04923875                          | TNR                        | 2.53E-05          | 2.53E-05             | 0.12544            | -7.97192                     | T down vs N                            | 34.066  | 40.3632   | 18.9574    | 1         |
| cg04924185                          | MT1IP                      | 3.13E-06          | 3.13E-06             | 7.84189            | 7.84189                      | T up vs N                              | 48.646  | 39.7262   | 13.0662    | 1         |
| cg04927066                          | SPOCK1                     | 0.00023858        | 0.000238576          | 5.86899            | 5.86899                      | T up vs N                              | 22.134  | 29.3327   | 21.2042    | 1         |
| cg04927725                          | PPP2CB;PPP2CB              | 0.00113696        | 0.00113696           | 0.324784           | -3.07897                     | T down vs N                            | 15.634  | 11.8455   | 12.123     | 1         |
| cg04930469                          | SOST                       | 0.0001109         | 0.000110902          | 5.26425            | 5.26425                      | T up vs N                              | 25.83   | 25.8386   | 16.0056    | 1         |
| cg04937561                          | SSRP1                      | 0.00342856        | 0.00342856           | 3.68473            | 3.68473                      | T up vs N                              | 13.78   | 11.4378   | 9.13047    | 1         |
| cg04938149                          | HBA2                       | 1.26E-05          | 1.26E-05             | 0.237825           | -4.20477                     | T down vs N                            | 38.494  | 19.3199   | 8.0303     | 1         |
| cg04939673                          | C4orf38;WWC2               | 7.18E-05          | 7.18E-05             | 5.69092            | 5.69092                      | T up vs N                              | 28.094  | 28.3202   | 16.1287    | 1         |
| cg04940582                          | CYP26B1                    | 0.00198576        | 0.00198576           | 0.224613           | -4.45211                     | T down vs N                            | 13.613  | 20.8882   | 24.5515    | 1         |
| cg04941246                          | WNT5A                      | 0.00129965        | 0.00129965           | 0.242107           | -4.1304                      | T down vs N                            | 15.136  | 18.8427   | 19.9188    | 1         |
| cg04941987                          | ATF6B;ATF6B;FKBPL          | 0.00369688        | 0.00369688           | 0.288343           | -3.46809                     | T down vs N                            | 11.528  | 14.4853   | 20.1047    | 1         |
| cg04944300                          | ESPNP                      | 0.00393747        | 0.00393747           | 0.256495           | -3.89872                     | T down vs N                            | 11.326  | 17.3401   | 24.4965    | 1         |
| cg04944784                          | FAM59B                     | 0.00123686        | 0.00123686           | 5.22422            | 5.22422                      | T up vs N                              | 15.319  | 25.6017   | 26.7396    | 1         |
| cg04945153                          | CFB                        | 0.00011289        | 0.000112893          | 0.292094           | -3.42355                     | T down vs N                            | 25.739  | 14.1857   | 8.81804    | 1         |
| cg04945945                          | TMC8;TMC6                  | 0.0001909         | 0.000190899          | 0.290388           | -3.44367                     | T down vs N                            | 23.172  | 14.3211   | 9.88845    | 1         |
| cg04946274                          | CYP27C1                    | 0.0007202         | 0.000720198          | 0.232252           | -4.30567                     | T down vs N                            | 17.401  | 19.963    | 18.3554    | 1         |
| cg04948763                          | ZBTB26                     | 2.84E-05          | 2.84E-05             | 0.308336           | -3.24321                     | T down vs N                            | 33.367  | 12.9656   | 6.21725    | 1         |
| cg04949632                          | KSR2                       | 7.56E-05          | 7.56E-05             | 0.287529           | -3.47791                     | T down vs N                            | 27.816  | 14.5512   | 8.36986    | 1         |
| cg04951371                          | TSSC1                      | 0.00140004        | 0.00140004           | 0.158174           | -6.32213                     | T down vs N                            | 14.862  | 31.85     | 34.2884    | 1         |
| SGOL1;SGOL1;SGOL1;SGOL1;SGOL1;S     |                            |                   |                      |                    |                              |                                        |         |           |            |           |
| cg04951797                          | GOL1                       | 5.75E-05          | 5.75E-05             | 0.200225           | -4.99438                     | T down vs N                            | 29.303  | 24.2272   | 13.2287    | 1         |
| cg04953015                          | CHRNA2                     | 9.90E-05          | 9.90E-05             | 0.327956           | -3.04919                     | T down vs N                            | 26.407  | 11.6417   | 7.05365    | 1         |
| cg04953958                          | ZNF862                     | 3.53E-05          | 3.53E-05             | 3.37004            | 3.37004                      | T up vs N                              | 32.068  | 13.8248   | 6.8977     | 1         |
| cg04954111                          | ABTB2                      | 4.93E-05          | 4.93E-05             | 0.189472           | -5.27782                     | T down vs N                            | 30.157  | 25.9187   | 13.7515    | 1         |
| cg04955573                          | GFI1;GFI1;GFI1             | 0.0066296         | 0.0066296            | 0.326918           | -3.05887                     | T down vs N                            | 9.72    | 11.708    | 19.2725    | 1         |
| cg04955912                          | FARP2                      | 2.38E-06          | 2.38E-06             | 10.7642            | 10.7642                      | T up vs N                              | 50.858  | 52.8856   | 16.6378    | 1         |
| cg04958496                          | LRP6                       | 4.36E-07          | 4.36E-07             | 0.213324           | -4.6877                      | T down vs N                            | 66.415  | 22.3556   | 5.38569    | 1         |
| SLC25A11;RNF167;SLC25A11;SLC25A1    |                            |                   |                      |                    |                              |                                        |         |           |            |           |
| cg04958703                          | 1                          | 2.73E-05          | 2.73E-05             | 0.194779           | -5.13403                     | T down vs N                            | 33.606  | 25.0651   | 11.9336    | 1         |
| cg04960169                          | RAP1GAP2;RAP1GAP2          | 1.72E-05          | 1.72E-05             | 0.26086            | -3.83347                     | T down vs N                            | 36.469  | 16.9126   | 7.42012    | 1         |
| cg04961235                          | PAPOLB;RADIL               | 6.97E-05          | 6.97E-05             | 5.45765            | 5.45765                      | T up vs N                              | 28.253  | 26.9733   | 15.2752    | 1         |
| cg04962756                          | RELA;RELA                  | 0.00010674        | 0.000106744          | 0.24364            | -4.10441                     | T down vs N                            | 26.023  | 18.6754   | 11.4822    | 1         |
| cg04963424                          | SLC26A10                   | 0.00111969        | 0.00111969           | 3.07799            | 3.07799                      | T up vs N                              | 15.691  | 11.8388   | 12.0717    | 1         |
| cg04963575                          | CELA1                      | 0.00024685        | 0.000246852          | 0.226965           | -4.40597                     | T down vs N                            | 21.977  | 20.5978   | 14.9957    | 1         |
| cg04965987                          | DSCR6                      | 0.00070023        | 0.000700229          | 6.00813            | 6.00813                      | T up vs N                              | 17.514  | 30.1146   | 27.512     | 1         |
| C18orf1;C18orf1;C18orf1;C18orf1;C18 |                            |                   |                      |                    |                              |                                        |         |           |            |           |
| cg04967578                          | orf1;C18orf1               | 1.39E-05          | 1.39E-05             | 3.65365            | 3.65365                      | T up vs N                              | 39.859  | 14.7999   | 5.56966    | 1         |
| cg04969878                          | TMEM19                     | 0.00037161        | 0.000371606          | 0.255621           | -3.91205                     | T down vs N                            | 20.155  | 17.4273   | 13.8349    | 1         |
| cg04969921                          | WDFY1                      | 3.17E-07          | 3.17E-07             | 0.257457           | -3.88414                     | T down vs N                            | 69.714  | 17.2448   | 3.95783    | 1         |
| cg04972436                          | BIRC5;BIRC5;EPR1;BIRC5     | 0.00039933        | 0.000399329          | 0.280241           | -3.56836                     | T down vs N                            | 19.844  | 15.1568   | 12.2209    | 1         |

| Probeset ID                  | UCSC_REFGENE_NAME         | p-value<br>(Type) | p-value (T vs.<br>N) | Ratio (T<br>vs. N) | Fold-<br>Change (T<br>vs. N) | Fold-Change (T vs.<br>N) (Description) | F(Type) | SS (Type) | SS (Error) | F (Error) |
|------------------------------|---------------------------|-------------------|----------------------|--------------------|------------------------------|----------------------------------------|---------|-----------|------------|-----------|
| cg04972930                   | OR6N1                     | 0.00195886        | 0.00195886           | 0.251645           | -3.97386                     | T down vs N                            | 13.66   | 17.8301   | 20.8839    | 1         |
| cg04973505                   | CEACAM16;CEACAM16         | 0.0006803         | 0.000680295          | 0.30693            | -3.25807                     | T down vs N                            | 17.629  | 13.0665   | 11.8589    | 1         |
| cg04976245                   | PTPRN2;PTPRN2;PTPRN2      | 0.00069143        | 0.00069143           | 0.261524           | -3.82374                     | T down vs N                            | 17.564  | 16.8487   | 15.3482    | 1         |
| cg04977124                   | MALAT1                    | 0.00305749        | 0.00305749           | 9.50125            | 9.50125                      | T up vs N                              | 19.593  | 21.1005   | 7.53856    | 1         |
| cg04977528                   | HEYL                      | 0.0016082         | 0.0016082            | 0.331554           | -3.0161                      | T down vs N                            | 14.36   | 11.4149   | 12.7187    | 1         |
| cg04978426                   | SNORD111;SF3B3            | 0.00132891        | 0.00132891           | 0.321948           | -3.10609                     | T down vs N                            | 15.054  | 12.031    | 12.7874    | 1         |
| cg04978470                   | ITLN2                     | 0.00027322        | 0.000273215          | 0.258011           | -3.87581                     | T down vs N                            | 21.516  | 17.1902   | 12.7831    | 1         |
| cg04982193                   | C8orf33                   | 1.51E-06          | 1.51E-06             | 0.240891           | -4.15125                     | T down vs N                            | 54.741  | 18.9767   | 5.54662    | 1         |
| cg04982488                   | AFAP1L2;AFAP1L2           | 1.55E-05          | 1.55E-05             | 0.244573           | -4.08875                     | T down vs N                            | 37.164  | 18.5744   | 7.99665    | 1         |
| cg04984852                   | BRSK2                     | 1.71E-05          | 1.71E-05             | 4.54362            | 4.54362                      | T up vs N                              | 36.527  | 21.4612   | 9.40065    | 1         |
| cg04985163                   | MICB                      | 8.60E-05          | 8.60E-05             | 0.257378           | -3.88533                     | T down vs N                            | 27.135  | 17.2526   | 10.1728    | 1         |
| cg04986555                   | TMEM61;TMEM61             | 1.48E-05          | 1.48E-05             | 4.83458            | 4.83458                      | T up vs N                              | 37.456  | 23.2574   | 9.93489    | 1         |
| cg04987362                   | CNTD1                     | 5.29E-05          | 5.29E-05             | 0.259857           | -3.84827                     | T down vs N                            | 29.757  | 17.0098   | 9.14592    | 1         |
| cg04988514                   | GRIN2D;GRWD1              | 4.91E-05          | 4.91E-05             | 5.55613            | 5.55613                      | T up vs N                              | 30.176  | 27.5448   | 14.6052    | 1         |
| cg04988917                   | FKSG83                    | 0.00610657        | 0.00610657           | 0.271378           | -3.6849                      | T down vs N                            | 9.9658  | 15.9323   | 25.5791    | 1         |
| cg04993112                   | SPRR2A                    | 4.88E-08          | 4.88E-08             | 0.119661           | -8.35692                     | T down vs N                            | 92.043  | 42.2181   | 7.33884    | 1         |
| cg04993130                   | EPS8L2                    | 2.02E-05          | 2.02E-05             | 3.12388            | 3.12388                      | T up vs N                              | 35.463  | 12.1526   | 5.48289    | 1         |
| cg04995095                   | CD300E                    | 0.00016285        | 0.000162854          | 0.128962           | -7.75419                     | T down vs N                            | 23.931  | 39.2935   | 26.2715    | 1         |
| cg04995521                   | RERE;RERE;RERE            | 2.88E-05          | 2.88E-05             | 0.307624           | -3.25072                     | T down vs N                            | 33.266  | 13.0166   | 6.26069    | 1         |
| cg04996388                   | MYADML2                   | 0.0034654         | 0.0034654            | 0.291812           | -3.42687                     | T down vs N                            | 11.737  | 14.208    | 19.3688    | 1         |
| cg04999026                   | TBX1;TBX1;TBX1            | 0.00114807        | 0.00114807           | 8.05416            | 8.05416                      | T up vs N                              | 15.597  | 40.7632   | 41.8156    | 1         |
| cg04999435                   | HRASLS5;HRASLS5;HRASLS5   | 1.03E-06          | 1.03E-06             | 0.181953           | -5.49591                     | T down vs N                            | 58.088  | 27.1959   | 7.49096    | 1         |
| cg05000039                   | RBM12B                    | 0.00010938        | 0.00010938           | 0.220485           | -4.53546                     | T down vs N                            | 25.9    | 21.4103   | 13.2267    | 1         |
| cg05000748                   | RUNX1                     | 0.00199196        | 0.00199196           | 5.68181            | 5.68181                      | T up vs N                              | 13.602  | 28.2681   | 33.2522    | 1         |
| cg05001389                   | GFI1B;GFI1B               | 0.00011947        | 0.000119469          | 0.294919           | -3.39077                     | T down vs N                            | 25.454  | 13.9647   | 8.77787    | 1         |
| cg05001531                   | RBPMS;RBPMS;RBPMS;RBPMS   | 2.31E-05          | 2.31E-05             | 6.23257            | 6.23257                      | T up vs N                              | 34.617  | 31.3591   | 14.4942    | 1         |
| cg05002166                   | ESRRG;ESRRG;ESRRG         | 4.38E-05          | 4.38E-05             | 0.125173           | -7.98893                     | T down vs N                            | 30.826  | 40.4461   | 20.9929    | 1         |
| cg05002406                   | PDLIM3;PDLIM3             | 0.00133848        | 0.00133848           | 0.234972           | -4.25583                     | T down vs N                            | 15.027  | 19.6459   | 20.9178    | 1         |
| cg05003322                   | COL16A1;COL16A1           | 0.00653221        | 0.00653221           | 0.325701           | -3.07031                     | T down vs N                            | 9.764   | 11.7862   | 19.3137    | 1         |
| cg05005367                   | RBM20                     | 0.00014261        | 0.000142607          | 0.237722           | -4.20659                     | T down vs N                            | 24.576  | 19.3315   | 12.5854    | 1         |
| cg05005432                   | OR52B2                    | 0.00011547        | 0.000115469          | 0.223248           | -4.47933                     | T down vs N                            | 25.626  | 21.0591   | 13.1487    | 1         |
| cg05007992                   | ALPI                      | 9.97E-05          | 9.97E-05             | 0.32176            | -3.1079                      | T down vs N                            | 26.372  | 12.0434   | 7.30686    | 1         |
| cg05008296                   | RDH11                     | 0.00011234        | 0.000112341          | 0.289603           | -3.45301                     | T down vs N                            | 25.764  | 14.3839   | 8.93262    | 1         |
| cg05013696                   | ORA4A16                   | 9.31E-05          | 9.31E-05             | 0.257462           | -3.88407                     | T down vs N                            | 26.723  | 17.2444   | 10.3248    | 1         |
| cg05013728                   | TRH                       | 0.00027207        | 0.000272074          | 14.928             | 14.928                       | T up vs N                              | 21.535  | 68.4431   | 50.8514    | 1         |
| cg05014727                   | PFKBFB3                   | 0.00010681        | 0.000106814          | 0.179153           | -5.58183                     | T down vs N                            | 26.02   | 27.6933   | 17.0289    | 1         |
| TMEM176B;TMEM176B;TMEM176A;T |                           |                   |                      |                    |                              |                                        |         |           |            |           |
| cg05017199                   | MEM176B;TMEM176B;TMEM176B | 3.18E-05          | 3.18E-05             | 9.26449            | 9.26449                      | T up vs N                              | 32.675  | 46.4179   | 22.7293    | 1         |
| cg05021638                   | GFRA2;GFRA2;GFRA2         | 0.00246496        | 0.00246496           | 6.7471             | 6.7471                       | T up vs N                              | 12.868  | 34.137    | 42.4456    | 1         |
| cg05021643                   | HOXD3                     | 9.09E-05          | 9.09E-05             | 62.184             | 62.184                       | T up vs N                              | 26.847  | 159.765   | 95.2153    | 1         |
| cg05021743                   | C2CD4D;LOC100132111       | 4.48E-06          | 4.48E-06             | 18.1908            | 18.1908                      | T up vs N                              | 45.873  | 78.8193   | 27.4912    | 1         |
| cg05022688                   | CLDN11                    | 0.00150431        | 0.00150431           | 8.30046            | 8.30046                      | T up vs N                              | 14.601  | 41.9489   | 45.9692    | 1         |
| cg05023214                   | EIF2C2;EIF2C2             | 0.00021761        | 0.000217605          | 3.77469            | 3.77469                      | T up vs N                              | 22.559  | 16.5259   | 11.7212    | 1         |
| cg05025071                   | EMR1                      | 0.00074927        | 0.000749267          | 0.299934           | -3.33407                     | T down vs N                            | 17.244  | 13.5817   | 12.6019    | 1         |
| cg05026881                   | TPSG1                     | 1.02E-05          | 1.02E-05             | 0.285722           | -3.4999                      | T down vs N                            | 39.927  | 14.6987   | 5.8903     | 1         |
| cg05027597                   | SLC8A2                    | 0.0008218         | 0.0008218            | 0.261712           | -3.821                       | T down vs N                            | 16.88   | 16.8307   | 15.9536    | 1         |
| cg05030961                   | RGS20;RGS20               | 0.00014742        | 0.000147417          | 0.29819            | -3.35356                     | T down vs N                            | 24.414  | 13.7135   | 8.98731    | 1         |
| cg05031993                   | D4S234E;D4S234E           | 0.0010351         | 0.0010351            | 0.273233           | -3.65987                     | T down vs N                            | 15.989  | 15.7663   | 15.7774    | 1         |
| cg05034446                   | IRF6                      | 1.33E-05          | 1.33E-05             | 0.185383           | -5.39423                     | T down vs N                            | 38.153  | 26.603    | 11.1563    | 1         |
| cg05035143                   | DNAJC15                   | 0.00205983        | 0.00205983           | 3.89099            | 3.89099                      | T up vs N                              | 13.485  | 17.2896   | 20.5141    | 1         |
| cg05036993                   | RAGE                      | 0.00110269        | 0.00110269           | 0.320262           | -3.12245                     | T down vs N                            | 15.749  | 12.1427   | 12.3362    | 1         |
| cg05039004                   | PTPRU;PTPRU;PTPRU         | 1.25E-05          | 1.25E-05             | 42.1326            | 42.1326                      | T up vs N                              | 38.536  | 131.068   | 54.419     | 1         |
| cg05039893                   | CCDC60                    | 0.00045123        | 0.000451227          | 0.32066            | -3.11856                     | T down vs N                            | 19.322  | 12.1162   | 10.0329    | 1         |
| cg05040360                   | MS4A6E                    | 0.00468672        | 0.00468672           | 0.238929           | -4.18535                     | T down vs N                            | 10.776  | 19.1955   | 28.5002    | 1         |
| cg05041477                   | MAPK15                    | 0.00170354        | 0.00170354           | 0.196753           | -5.08252                     | T down vs N                            | 14.154  | 24.7571   | 27.9866    | 1         |
| cg05046377                   | OR51A7                    | 9.18E-08          | 9.18E-08             | 0.16139            | -6.19619                     | T down vs N                            | 83.903  | 31.1587   | 5.94187    | 1         |
| cg05048523                   | OBSN;OBSN                 | 4.62E-05          | 4.62E-05             | 0.280775           | -3.56157                     | T down vs N                            | 30.523  | 15.1115   | 7.92124    | 1         |
| cg05048624                   | PLA2G2D                   | 1.39E-06          | 1.39E-06             | 0.191849           | -5.21243                     | T down vs N                            | 55.407  | 25.5317   | 7.37283    | 1         |
| cg05048730                   | ORSB12                    | 7.75E-05          | 7.75E-05             | 0.14824            | -6.74582                     | T down vs N                            | 27.688  | 34.1302   | 19.7224    | 1         |
| cg05048976                   | WNT5A                     | 0.00083507        | 0.000835066          | 3.2904             | 3.2904                       | T up vs N                              | 16.817  | 13.2859   | 12.6405    | 1         |
| cg05050757                   | ATF7;ATF7                 | 0.00722377        | 0.00722377           | 4.34535            | 4.34535                      | T up vs N                              | 11.933  | 12.2513   | 9.23991    | 1         |
| cg05051902                   | WHSC2                     | 0.00087797        | 0.000877973          | 0.245001           | -4.08161                     | T down vs N                            | 16.622  | 18.5283   | 17.8353    | 1         |
| cg05053327                   | CNTNAP1                   | 1.23E-06          | 1.23E-06             | 6.46435            | 6.46435                      | T up vs N                              | 56.537  | 32.6231   | 9.23232    | 1         |
| cg05053594                   | MMP25                     | 4.34E-06          | 4.34E-06             | 3.26465            | 3.26465                      | T up vs N                              | 46.101  | 13.1112   | 4.55044    | 1         |
| cg05053689                   | OTOF                      | 9.91E-05          | 9.91E-05             | 5.02459            | 5.02459                      | T up vs N                              | 26.403  | 24.4092   | 14.7919    | 1         |
| CMTM1;CMTM1;CMTM1;CMTM1;CM   |                           |                   |                      |                    |                              |                                        |         |           |            |           |
| cg05054953                   | TM1;CMTM1;CMTM1;CMTM1     | 1.57E-05          | 1.57E-05             | 0.270263           | -3.7001                      | T down vs N                            | 37.062  | 16.0331   | 6.92164    | 1         |
| cg05057083                   | NUMB;NUMB;NUMB;NUMB       | 2.62E-07          | 2.62E-07             | 0.250694           | -3.98893                     | T down vs N                            | 71.758  | 17.9281   | 3.99748    | 1         |
| cg05057291                   | NLRC4                     | 0.00054083        | 0.000540826          | 0.26149            | -3.82424                     | T down vs N                            | 18.565  | 16.852    | 14.5241    | 1         |
| cg05058748                   | SH3BP4                    | 0.00012186        | 0.000121862          | 3.10307            | 3.10307                      | T up vs N                              | 25.355  | 12.0103   | 7.57895    | 1         |
| cg05058758                   | KYNU                      | 0.0004099         | 0.000409903          | 3.74545            | 3.74545                      | T up vs N                              | 19.732  | 16.333    | 13.2442    | 1         |

| Probeset ID                    | UCSC_REFGENE_NAME           | p-value<br>(Type) | p-value (T vs.<br>N) | Ratio (T<br>vs. N) | Fold-<br>Change (T<br>vs. N) | Fold-Change (T vs.<br>N) (Description) | F(Type) | SS (Type) | SS (Error) | F (Error) |
|--------------------------------|-----------------------------|-------------------|----------------------|--------------------|------------------------------|----------------------------------------|---------|-----------|------------|-----------|
| cg05058809                     | MSLNL                       | 0.00018548        | 0.000185479          | 0.205244           | -4.87226                     | T down vs N                            | 23.309  | 23.4871   | 16.1225    | 1         |
| cg05059169                     | COQ10B                      | 0.00018183        | 0.000181825          | 0.269025           | -3.71713                     | T down vs N                            | 23.403  | 16.1458   | 11.0384    | 1         |
| cg05060175                     | PLEKHF2                     | 5.79E-05          | 5.79E-05             | 0.309144           | -3.23473                     | T down vs N                            | 29.259  | 12.908    | 7.05872    | 1         |
| cg05061886                     | MN1                         | 4.93E-05          | 4.93E-05             | 4.85063            | 4.85063                      | T up vs N                              | 30.151  | 23.3553   | 12.3939    | 1         |
| cg05062491                     | EPHA8;EPAH8                 | 1.86E-05          | 1.86E-05             | 0.295702           | -3.38178                     | T down vs N                            | 35.975  | 13.9041   | 6.18395    | 1         |
| cg05064106                     | MOV10L1;MOV10L1;MOV10L1     | 0.00164547        | 0.00164547           | 3.12401            | 3.12401                      | T up vs N                              | 14.278  | 12.1534   | 13.6195    | 1         |
| cg05064181                     | ABLM1;ABLM1                 | 8.82E-05          | 8.82E-05             | 0.300283           | -3.33019                     | T down vs N                            | 27.007  | 13.5554   | 8.03076    | 1         |
| cg05065507                     | TACSTD2;TACSTD2             | 3.00E-06          | 3.00E-06             | 17.455             | 17.455                       | T up vs N                              | 48.998  | 76.5915   | 25.0107    | 1         |
| cg05065603                     | PCYT1A                      | 0.00228435        | 0.00228435           | 0.241029           | -4.14888                     | T down vs N                            | 13.128  | 18.9615   | 23.1102    | 1         |
| cg05065846                     | GRM8;GRM8;GRM8              | 3.58E-05          | 3.58E-05             | 0.282767           | -3.53648                     | T down vs N                            | 31.993  | 14.9437   | 7.47352    | 1         |
| cg05068156                     | OR10C1                      | 1.04E-05          | 1.04E-05             | 0.202683           | -4.93382                     | T down vs N                            | 39.82   | 23.861    | 9.58752    | 1         |
| cg05068987                     | MAST1                       | 0.00020798        | 0.000207979          | 9.48017            | 9.48017                      | T up vs N                              | 22.77   | 47.3826   | 33.2955    | 1         |
| cg05070250                     | C11orf74;RAG2               | 0.00053977        | 0.000539774          | 0.199458           | -5.01358                     | T down vs N                            | 18.573  | 24.3429   | 20.9712    | 1         |
| cg05070273                     | ZNF589                      | 0.00091641        | 0.00091641           | 0.30372            | -3.2925                      | T down vs N                            | 16.456  | 13.3002   | 12.9319    | 1         |
| cg05073044                     | SNAPC1                      | 0.00034037        | 0.000340367          | 0.270457           | -3.69745                     | T down vs N                            | 20.538  | 16.0155   | 12.4768    | 1         |
| cg05073901                     | SUNC1;SUNC1                 | 3.07E-05          | 3.07E-05             | 0.311371           | -3.2116                      | T down vs N                            | 32.885  | 12.7506   | 6.20372    | 1         |
| cg05074385                     | TRIM15                      | 2.99E-05          | 2.99E-05             | 0.221821           | -4.50814                     | T down vs N                            | 33.059  | 21.2396   | 10.2797    | 1         |
| cg05075545                     | ANKRD24;ANKRD24;SIRT6       | 4.25E-06          | 4.25E-06             | 0.123591           | -8.09123                     | T down vs N                            | 46.276  | 40.9429   | 14.1562    | 1         |
| cg05076820                     | LOC100124692                | 9.55E-06          | 9.55E-06             | 0.191214           | -5.22974                     | T down vs N                            | 40.39   | 25.6343   | 10.1548    | 1         |
| cg05079448                     | PIWIL2;PIWIL2               | 0.00061484        | 0.00061484           | 0.282947           | -3.53423                     | T down vs N                            | 18.038  | 14.9287   | 13.2418    | 1         |
| cg05080966                     | DGAT1                       | 0.00363765        | 0.00363765           | 0.31679            | -3.15666                     | T down vs N                            | 11.58   | 12.3763   | 17.1004    | 1         |
| cg05081223                     | H2AFJ;H2AFJ;H2AFJ           | 0.00320371        | 0.00320371           | 3.55131            | 3.55131                      | T up vs N                              | 11.993  | 15.0429   | 20.0688    | 1         |
| cg05081778                     | ATP6V1B1                    | 0.00175757        | 0.00175757           | 0.301653           | -3.31507                     | T down vs N                            | 14.043  | 13.4531   | 15.3283    | 1         |
| cg05082466                     | SERPINB6                    | 0.00361412        | 0.00361412           | 3.2425             | 3.2425                       | T up vs N                              | 11.601  | 12.9608   | 17.8756    | 1         |
| cg05082563                     | AKR1D1                      | 0.00020937        | 0.000209367          | 0.286655           | -3.48851                     | T down vs N                            | 22.738  | 14.6224   | 10.2891    | 1         |
| cg05083067                     | ORS1D1                      | 4.35E-05          | 4.35E-05             | 0.237862           | -4.20411                     | T down vs N                            | 30.855  | 19.3156   | 10.0163    | 1         |
| cg05090716                     | C20orf202                   | 0.00472309        | 0.00472309           | 0.303785           | -3.2918                      | T down vs N                            | 10.752  | 13.2954   | 19.7844    | 1         |
| cg05091653                     | SP100;SP100                 | 0.00020372        | 0.00020372           | 0.276686           | -3.61421                     | T down vs N                            | 22.866  | 15.4626   | 10.8194    | 1         |
| cg05096415                     | LRIT2                       | 0.00162816        | 0.00162816           | 0.291485           | -3.43071                     | T down vs N                            | 14.316  | 14.2339   | 15.9087    | 1         |
| cg05096756                     | WDFY4                       | 3.46E-06          | 3.46E-06             | 0.240332           | -4.16092                     | T down vs N                            | 47.861  | 19.0388   | 6.36464    | 1         |
| cg05098417                     | C11orf20                    | 8.59E-05          | 8.59E-05             | 4.0096             | 4.0096                       | T up vs N                              | 27.145  | 18.0623   | 10.6463    | 1         |
| cg05099221                     | PRR15L                      | 4.16E-06          | 4.16E-06             | 0.259157           | -3.85866                     | T down vs N                            | 46.441  | 17.0779   | 5.88371    | 1         |
| cg05099464                     | ARHGEF12                    | 0.00018151        | 0.000181511          | 0.205865           | -4.85755                     | T down vs N                            | 23.411  | 23.3975   | 15.9906    | 1         |
| cg05099493                     | ESPNL                       | 0.00305754        | 0.00305754           | 0.19277            | -5.18752                     | T down vs N                            | 12.147  | 25.3837   | 33.4361    | 1         |
|                                |                             |                   |                      |                    |                              |                                        |         |           |            |           |
| cg05102817                     | RBM18;RBM18;MRRF;RBM18;MRRF | 0.00336504        | 0.00336504           | 0.328098           | -3.04787                     | T down vs N                            | 11.832  | 11.6326   | 15.7298    | 1         |
| cg05103623                     | TAGAP;TAGAP;TAGAP           | 0.00059438        | 0.000594379          | 0.30503            | -3.27837                     | T down vs N                            | 18.176  | 13.2043   | 11.6233    | 1         |
| cg05105138                     | ORS2A5                      | 7.02E-05          | 7.02E-05             | 0.280277           | -3.5679                      | T down vs N                            | 28.211  | 15.1538   | 8.59456    | 1         |
| cg05106502                     | SKAP1;SKAP1                 | 1.33E-05          | 1.33E-05             | 0.162059           | -6.17061                     | T down vs N                            | 38.164  | 31.0176   | 13.004     | 1         |
| cg05111146                     | BRD2                        | 1.62E-05          | 1.62E-05             | 0.244387           | -4.09187                     | T down vs N                            | 36.865  | 18.5945   | 8.07037    | 1         |
| cg05111779                     | RGS6                        | 0.00014038        | 0.000140375          | 0.295533           | -3.38372                     | T down vs N                            | 24.654  | 13.9172   | 9.03206    | 1         |
| cg05117324                     | ORS2K2                      | 7.45E-05          | 7.45E-05             | 0.241591           | -4.13923                     | T down vs N                            | 27.896  | 18.8995   | 10.8401    | 1         |
| cg05119290                     | SPNS2                       | 1.85E-05          | 1.85E-05             | 4.89081            | 4.89081                      | T up vs N                              | 35.998  | 23.5999   | 10.4895    | 1         |
| cg05121989                     | EFNB1                       | 0.00152954        | 0.00152954           | 0.283527           | -3.527                       | T down vs N                            | 14.541  | 14.8803   | 16.3739    | 1         |
| cg05122965                     | TRIM5;TRIM5;TRIM5           | 0.00137649        | 0.00137649           | 0.301447           | -3.31734                     | T down vs N                            | 14.924  | 13.4684   | 14.4392    | 1         |
| cg05124308                     | TMEM200B                    | 0.0010542         | 0.0010542            | 3.14899            | 3.14899                      | T up vs N                              | 15.919  | 12.324    | 12.3865    | 1         |
| cg05125641                     | KCNQ1;KCNQ1                 | 1.78E-06          | 1.78E-06             | 0.120759           | -8.28097                     | T down vs N                            | 53.28   | 41.8558   | 12.5693    | 1         |
| cg05126887                     | COL21A1                     | 0.00044389        | 0.000443891          | 6.68484            | 6.68484                      | T up vs N                              | 19.392  | 33.8062   | 27.8931    | 1         |
| cg05127217                     | TTC12                       | 6.87E-05          | 6.87E-05             | 7.413              | 7.413                        | T up vs N                              | 28.33   | 37.586    | 21.2278    | 1         |
| cg05127821                     | CYP26C1                     | 3.32E-05          | 3.32E-05             | 17.1441            | 17.1441                      | T up vs N                              | 32.419  | 75.6318   | 37.3271    | 1         |
| cg05129050                     | CAMTA1                      | 7.49E-06          | 7.49E-06             | 0.257493           | -3.88359                     | T down vs N                            | 42.091  | 17.2412   | 6.55387    | 1         |
| cg05133853                     | HBBP1                       | 1.63E-06          | 1.63E-06             | 0.125452           | -7.97115                     | T down vs N                            | 54.029  | 40.3594   | 11.9519    | 1         |
| cg05135107                     | LILRP2                      | 8.18E-05          | 8.18E-05             | 0.312686           | -3.1981                      | T down vs N                            | 27.403  | 12.6587   | 7.39127    | 1         |
| cg05136956                     | PTP4A3;PTP4A3               | 1.49E-06          | 1.49E-06             | 0.234651           | -4.26164                     | T down vs N                            | 54.856  | 19.683    | 5.74094    | 1         |
| cg05137680                     | LOC389333                   | 5.45E-05          | 5.45E-05             | 6.61547            | 6.61547                      | T up vs N                              | 29.592  | 33.436    | 18.0783    | 1         |
| cg05138957                     | MIR377                      | 5.32E-06          | 5.32E-06             | 0.321636           | -3.10911                     | T down vs N                            | 44.58   | 12.0516   | 4.32536    | 1         |
| cg05139709                     | PDE6B;PDE6B;PDE6B           | 0.00243419        | 0.00243419           | 0.223049           | -4.48333                     | T down vs N                            | 12.911  | 21.0841   | 26.1291    | 1         |
| cg05140648                     | DDN                         | 0.00032203        | 0.000322034          | 7.52554            | 7.52554                      | T up vs N                              | 20.782  | 38.1535   | 29.3745    | 1         |
|                                |                             |                   |                      |                    |                              |                                        |         |           |            |           |
| UGT1A10;UGT1A6;UGT1A8;UGT1A6;U |                             |                   |                      |                    |                              |                                        |         |           |            |           |
| cg05141602                     | GT1A9;UGT1A4;UGT1A7;UGT1A5  | 0.00015923        | 0.000159227          | 0.326051           | -3.067                       | T down vs N                            | 24.04   | 11.7636   | 7.82951    | 1         |
| cg05141695                     | DUSP22                      | 0.00097591        | 0.000975908          | 0.200472           | -4.98824                     | T down vs N                            | 16.214  | 24.1901   | 23.8716    | 1         |
| cg05141988                     | SCML4                       | 9.56E-05          | 9.56E-05             | 0.321214           | -3.11319                     | T down vs N                            | 26.589  | 12.0795   | 7.26883    | 1         |
| cg05142520                     | WNT10B                      | 1.73E-05          | 1.73E-05             | 9.8468             | 9.8468                       | T up vs N                              | 36.452  | 48.9948   | 21.5055    | 1         |
| cg05143386                     | OR7G2                       | 6.54E-05          | 6.54E-05             | 0.29078            | -3.43902                     | T down vs N                            | 28.595  | 14.2899   | 7.99568    | 1         |
| cg05144285                     | VIPR2                       | 6.57E-07          | 6.57E-07             | 0.174902           | -5.7175                      | T down vs N                            | 62.351  | 28.4722   | 7.30635    | 1         |
| cg05145428                     | SDCCAG3;SDCCAG3;SDCCAG3     | 0.00028324        | 0.000283242          | 0.326725           | -3.06068                     | T down vs N                            | 21.354  | 11.7203   | 8.7818     | 1         |
| cg05147195                     | DAXX;DAXX;DAXX;DAXX         | 0.00047393        | 0.000473927          | 0.222222           | -4.50001                     | T down vs N                            | 19.115  | 21.1886   | 17.7354    | 1         |
| cg05147692                     | CRP                         | 0.00043631        | 0.000436305          | 0.235049           | -4.25443                     | T down vs N                            | 19.465  | 19.637    | 16.1413    | 1         |
| cg05149586                     | SDSL                        | 2.33E-06          | 2.33E-06             | 0.283306           | -3.52976                     | T down vs N                            | 51.035  | 14.8987   | 4.67089    | 1         |
| cg05155058                     | SMS                         | 0.00314424        | 0.00314424           | 0.311136           | -3.21403                     | T down vs N                            | 12.055  | 12.7672   | 16.9458    | 1         |

| Probeset ID | UCSC_REFGENE_NAME               | p-value<br>(Type) | p-value (T vs.<br>N) | Ratio (T<br>vs. N) | Fold-<br>Change (T<br>vs. N) | Fold-Change (T vs.<br>N) (Description) | F(Type) | SS (Type) | SS (Error) | F (Error) |
|-------------|---------------------------------|-------------------|----------------------|--------------------|------------------------------|----------------------------------------|---------|-----------|------------|-----------|
| cg05156901  | CPT1B;CPT1B;CPT1B;CHKB-         | 1.24E-05          | 1.24E-05             | 7.82808            | 7.82808                      | T up vs N                              | 38.617  | 39.6582   | 16.4313    | 1         |
| cg05157171  | CPT1B;CPT1B;CPT1B;CPT1B         | 0.0014143         | 0.0014143            | 3.84437            | 3.84437                      | T up vs N                              | 14.825  | 16.9842   | 18.3302    | 1         |
| cg05157625  | HLA-A                           | 2.99E-05          | 2.99E-05             | 3.06989            | 3.06989                      | T up vs N                              | 33.047  | 11.7834   | 5.70504    | 1         |
| cg05157725  | RIN3                            | 6.85E-05          | 6.85E-05             | 13.273             | 13.273                       | T up vs N                              | 28.345  | 62.6223   | 35.3484    | 1         |
| cg05159188  | COL21A1                         | 0.00133139        | 0.00133139           | 8.29227            | 8.29227                      | T up vs N                              | 15.047  | 41.9098   | 44.5651    | 1         |
| cg05160234  | HIST1H4F                        | 2.29E-06          | 2.29E-06             | 0.189897           | -5.26602                     | T down vs N                            | 51.195  | 25.8491   | 8.0787     | 1         |
| cg05161795  | CD3G;CD3D;CD3D                  | 0.00016896        | 0.000168963          | 0.176791           | -5.6564                      | T down vs N                            | 23.754  | 28.1224   | 18.9428    | 1         |
| cg05162031  | ZDHHC3;ZDHHC3;EXOSC7;ZDHHC3;EX  | 1.09E-05          | 1.09E-05             | 0.324829           | -3.07854                     | T down vs N                            | 39.488  | 11.8426   | 4.79847    | 1         |
| cg05163056  | OSC7                            | 0.00063297        | 0.000632969          | 0.313686           | -3.1879                      | T down vs N                            | 17.92   | 12.5893   | 11.2402    | 1         |
| cg05163071  | NXN                             | 0.00236747        | 0.00236747           | 0.215438           | -4.64172                     | T down vs N                            | 13.005  | 22.0712   | 27.1532    | 1         |
| cg05164449  | CSF3R;CSF3R;CSF3R;CSF3R         | 9.77E-05          | 9.77E-05             | 0.133445           | -7.49375                     | T down vs N                            | 26.474  | 37.9936   | 22.9622    | 1         |
| cg05169846  | RETNLB                          | 0.00026149        | 0.000261485          | 4.39412            | 4.39412                      | T up vs N                              | 21.715  | 20.523    | 15.1218    | 1         |
| cg05171197  | PTPRN2;PTPRN2;PTPRN2            | 0.00020931        | 0.000209314          | 4.96976            | 4.96976                      | T up vs N                              | 22.74   | 24.0785   | 16.9421    | 1         |
| cg05174975  | CACNA2D4                        | 3.69E-05          | 3.69E-05             | 0.211187           | -4.73514                     | T down vs N                            | 31.813  | 22.648    | 11.3905    | 1         |
| cg05175020  | HDAC4                           | 0.00011932        | 0.000119318          | 0.306841           | -3.25901                     | T down vs N                            | 25.461  | 13.0729   | 8.21526    | 1         |
| cg05176569  | RPL23                           | 0.00375078        | 0.00375078           | 3.09341            | 3.09341                      | T up vs N                              | 11.481  | 11.9443   | 16.6452    | 1         |
| cg05177629  | TSC22D4                         | 0.00077556        | 0.000775556          | 0.299001           | -3.34447                     | T down vs N                            | 17.108  | 13.6521   | 12.7683    | 1         |
| cg05178005  | MCF2L2                          | 0.00074043        | 0.000740426          | 0.282056           | -3.54539                     | T down vs N                            | 17.291  | 15.0033   | 12.78831   | 1         |
| cg05178604  | SEMGI                           | 3.99E-07          | 3.99E-07             | 0.302322           | -3.30773                     | T down vs N                            | 67.305  | 13.4034   | 3.18631    | 1         |
| cg05182265  | BMPIR1A                         | 0.00028479        | 0.000284788          | 0.249627           | -4.00598                     | T down vs N                            | 21.329  | 18.0388   | 13.5316    | 1         |
| cg05183927  | FBXL8;TRADD                     | 3.89E-05          | 3.89E-05             | 0.294747           | -3.39274                     | T down vs N                            | 31.499  | 13.978    | 7.10011    | 1         |
| cg05185573  | UBE3C                           | 0.00032811        | 0.000328109          | 0.294815           | -3.39196                     | T down vs N                            | 20.699  | 13.9728   | 10.8006    | 1         |
| cg05188150  | CYP2W1                          | 0.00044415        | 0.000444153          | 0.220505           | -4.53505                     | T down vs N                            | 19.389  | 21.4077   | 17.6655    | 1         |
| cg05193162  | ABT1                            | 0.0008801         | 0.000880103          | 0.268928           | -3.71846                     | T down vs N                            | 16.612  | 16.1546   | 15.5593    | 1         |
| cg05194545  | TMX3;CCDC102B                   | 0.00140439        | 0.00140439           | 0.305907           | -3.26896                     | T down vs N                            | 14.851  | 13.1405   | 14.1573    | 1         |
| cg05200037  | SLC5A8                          | 5.96E-06          | 5.96E-06             | 15.9418            | 15.9418                      | T up vs N                              | 43.744  | 71.811    | 26.2657    | 1         |
| cg05200373  | ARHGAP12                        | 0.00200532        | 0.00200532           | 0.27635            | -3.6186                      | T down vs N                            | 13.579  | 15.4918   | 18.2546    | 1         |
| cg05205351  | ZC3H12D                         | 3.66E-05          | 3.66E-05             | 0.254744           | -3.92551                     | T down vs N                            | 31.852  | 17.5152   | 8.79842    | 1         |
| cg05206587  | SLC39A7;SLC39A7                 | 8.72E-06          | 8.72E-06             | 0.233236           | -4.28751                     | T down vs N                            | 41.018  | 19.8476   | 7.74194    | 1         |
| cg05207107  | NOP56;SNORD110;NOP56;SNORA51    | 0.00142874        | 0.00142874           | 0.295447           | -3.3847                      | T down vs N                            | 14.788  | 13.9238   | 15.0649    | 1         |
| cg05207620  | GLRA2;GLRA2;GLRA2;GLRA2         | 0.00108897        | 0.00108897           | 3.2259             | 3.2259                       | T up vs N                              | 15.796  | 12.8479   | 13.0136    | 1         |
| cg05209514  | ERBB3                           | 0.00044439        | 0.000444391          | 0.277502           | -3.60358                     | T down vs N                            | 19.387  | 15.3918   | 12.7027    | 1         |
| cg05210338  | VSIG2                           | 1.61E-08          | 1.61E-08             | 0.222342           | -4.49757                     | T down vs N                            | 107.92  | 21.1734   | 3.13909    | 1         |
| cg05210804  | NSFL1C;NSFL1C;NSFL1C            | 0.00033184        | 0.000331838          | 4.60189            | 4.60189                      | T up vs N                              | 20.65   | 21.8241   | 16.9102    | 1         |
| cg05211342  | ZBTB22;TAPBP;TAPBP;TAPBP;ZBTB22 | 1.51E-05          | 1.51E-05             | 0.297896           | -3.35687                     | T down vs N                            | 37.313  | 13.7359   | 5.89008    | 1         |
| cg05211836  | CCDC155                         | 1.50E-05          | 1.50E-05             | 0.293137           | -3.41138                     | T down vs N                            | 37.362  | 14.1037   | 6.03986    | 1         |
| cg05212570  | F2RL3                           | 2.40E-05          | 2.40E-05             | 0.178029           | -5.61706                     | T down vs N                            | 34.39   | 27.8963   | 12.9787    | 1         |
| cg05213296  | ALDH2                           | 0.00037517        | 0.000375165          | 0.257986           | -3.87618                     | T down vs N                            | 20.113  | 17.1927   | 13.6767    | 1         |
| cg05213654  | RPF2                            | 5.05E-05          | 5.05E-05             | 0.294918           | -3.39077                     | T down vs N                            | 30.019  | 13.9648   | 7.44316    | 1         |
| cg05213661  | ZNRF4                           | 4.66E-06          | 4.66E-06             | 0.269333           | -3.71288                     | T down vs N                            | 45.561  | 16.1176   | 5.66017    | 1         |
| cg05214235  | SLC6A18                         | 0.00279481        | 0.00279481           | 0.176593           | -5.66275                     | T down vs N                            | 12.445  | 28.1588   | 36.2024    | 1         |
| cg05215011  | TEAD1                           | 3.52E-05          | 3.52E-05             | 0.270337           | -3.69909                     | T down vs N                            | 32.086  | 16.0263   | 7.99166    | 1         |
| cg05216141  | LRRCSO                          | 0.0014222         | 0.0014222            | 4.93651            | 4.93651                      | T up vs N                              | 14.805  | 23.8773   | 25.8049    | 1         |
| cg05217312  | ETV7                            | 0.00021546        | 0.000215455          | 0.329396           | -3.03586                     | T down vs N                            | 22.605  | 11.5503   | 8.1755     | 1         |
| cg05217983  | KIAA1217                        | 2.17E-06          | 2.17E-06             | 0.275482           | -3.63                        | T down vs N                            | 51.63   | 15.5677   | 4.82439    | 1         |
| cg05220510  | RUNX2;RUNX2;RUNX2               | 0.00062143        | 0.000621432          | 0.307747           | -3.24942                     | T down vs N                            | 17.995  | 13.0078   | 11.5658    | 1         |
| cg05220968  | CLEC10A;CLEC10A                 | 2.74E-07          | 2.74E-07             | 0.232858           | -4.29445                     | T down vs N                            | 71.281  | 19.8918   | 4.46496    | 1         |
| cg05222216  | EPM2A;EPM2A                     | 2.89E-06          | 2.89E-06             | 0.135198           | -7.39654                     | T down vs N                            | 49.291  | 37.5026   | 12.1735    | 1         |
| cg05222243  | MUC16                           | 7.01E-05          | 7.01E-05             | 0.275742           | -3.62657                     | T down vs N                            | 28.22   | 15.5449   | 8.81353    | 1         |
| cg05222671  | COL13A1;COL13A1;COL13A1;COL13A1 | 9.52E-05          | 9.52E-05             | 0.2364             | -4.23012                     | T down vs N                            | 26.609  | 19.4819   | 11.7143    | 1         |
| cg05224770  | 1;COL13A1;COL13A1;COL13A1       | 1.77E-06          | 1.77E-06             | 0.181206           | -5.51858                     | T down vs N                            | 53.362  | 27.3274   | 8.19388    | 1         |
| cg05224922  | MESTIT1;MEST;MEST               | 1.26E-05          | 1.26E-05             | 0.304417           | -3.28496                     | T down vs N                            | 38.516  | 13.2491   | 5.5038     | 1         |
| cg05229965  | IFNG                            | 0.0003799         | 0.000379896          | 0.273886           | -3.65116                     | T down vs N                            | 20.059  | 15.7084   | 12.5297    | 1         |
| cg05230642  | TRAPPC9;TRAPPC9                 | 0.00050472        | 0.000504718          | 0.311067           | -3.21475                     | T down vs N                            | 18.852  | 12.772    | 10.8401    | 1         |
| cg05231480  | ADAM12;ADAM12                   | 0.00037106        | 0.000371058          | 0.263948           | -3.78862                     | T down vs N                            | 20.161  | 16.6177   | 13.188     | 1         |
| cg05231542  | SNORD115-14                     | 7.64E-06          | 7.64E-06             | 0.180505           | -5.54                        | T down vs N                            | 41.952  | 27.4515   | 10.4698    | 1         |
| cg05232081  | SEC1;NTN5                       | 7.08E-08          | 7.08E-08             | 0.167645           | -5.965                       | T down vs N                            | 87.174  | 29.8731   | 5.48296    | 1         |
| cg05232496  | CCDC108;CCDC108                 | 3.24E-05          | 3.24E-05             | 0.238366           | -4.19523                     | T down vs N                            | 32.571  | 19.2588   | 9.46064    | 1         |
| cg05232914  | HPCAL1;HPCAL1                   | 4.94E-06          | 4.94E-06             | 0.179239           | -5.57916                     | T down vs N                            | 45.128  | 27.6778   | 9.81309    | 1         |
| cg05233288  | SLC6A3                          | 7.20E-06          | 7.20E-06             | 0.196797           | -5.08137                     | T down vs N                            | 42.372  | 24.7502   | 9.34596    | 1         |
| cg05233289  | ORSH6                           | 0.00106748        | 0.00106748           | 0.162117           | -6.16838                     | T down vs N                            | 15.872  | 31.0053   | 31.2558    | 1         |
| cg05235171  | PEX14                           | 4.35E-05          | 4.35E-05             | 0.26275            | -3.80589                     | T down vs N                            | 30.858  | 16.7314   | 8.67521    | 1         |
| cg05237641  | CCDC88B                         | 0.0010466         | 0.0010466            | 9.86517            | 9.86517                      | T up vs N                              | 15.947  | 49.0746   | 49.2387    | 1         |
| cg05238517  | TMPRSS4;TMPRSS4                 | 9.67E-05          | 9.67E-05             | 19.864             | 19.864                       | T up vs N                              | 26.529  | 83.6735   | 50.4639    | 1         |

| Probeset ID | UCSC_REFGENE_NAME                                                      | p-value<br>(Type) | p-value (T vs.<br>N) | Ratio (T<br>vs. N) | Fold-<br>Change (T<br>vs. N) | Fold-Change (T vs.<br>N) (Description) | F(Type) | SS (Type) | SS (Error) | F (Error) |
|-------------|------------------------------------------------------------------------|-------------------|----------------------|--------------------|------------------------------|----------------------------------------|---------|-----------|------------|-----------|
| cg05238782  | DPYSL2                                                                 | 0.00017015        | 0.000170152          | 3.15123            | 3.15123                      | T up vs N                              | 23.72   | 12.3393   | 8.3233     | 1         |
| cg05239173  | NSMCE2                                                                 | 0.00050033        | 0.000500331          | 0.243601           | -4.10508                     | T down vs N                            | 18.888  | 18.6797   | 15.8235    | 1         |
| cg05239225  | AKAP13;AKAP13                                                          | 0.00262534        | 0.00262534           | 0.306704           | -3.26047                     | T down vs N                            | 12.655  | 13.0828   | 16.5411    | 1         |
| cg05240855  | IL1F9                                                                  | 0.00042524        | 0.000425244          | 0.289027           | -3.45988                     | T down vs N                            | 19.575  | 14.4301   | 11.795     | 1         |
| cg05242065  | C2orf89                                                                | 0.00016639        | 0.000166392          | 0.329921           | -3.03102                     | T down vs N                            | 23.827  | 11.5172   | 7.7338     | 1         |
| cg05244766  | GSTP1                                                                  | 0.00020253        | 0.000202526          | 0.326779           | -3.06017                     | T down vs N                            | 23.752  | 11.0276   | 6.96432    | 1         |
| cg05245650  | CDC42EP3                                                               | 2.70E-05          | 2.70E-05             | 0.195579           | -5.11301                     | T down vs N                            | 33.666  | 24.9396   | 11.8529    | 1         |
| cg05246081  | GYPC;GYPC                                                              | 0.00193746        | 0.00193746           | 0.286545           | -3.48986                     | T down vs N                            | 13.699  | 14.6314   | 17.0892    | 1         |
| cg05248470  | LILRB2;LILRB2                                                          | 0.00014968        | 0.000149676          | 0.291046           | -3.43588                     | T down vs N                            | 24.34   | 14.2687   | 9.37965    | 1         |
| cg05248742  | PRKCB;PRKCB                                                            | 0.00022357        | 0.000223569          | 0.175939           | -5.68378                     | T down vs N                            | 22.433  | 28.2794   | 20.1697    | 1         |
| cg05248781  | LCE5A<br>FCAR;FCAR;FCAR;FCAR;FCAR;FC<br>AR;FCAR;FCAR;FCAR;FCAR;FCAR;FC | 1.72E-09          | 1.72E-09             | 0.244858           | -4.084                       | T down vs N                            | 147.62  | 18.5437   | 2.00996    | 1         |
| cg05252264  | FCAR;FCAR;FCAR;FCAR;FC                                                 | 1.81E-05          | 1.81E-05             | 0.131006           | -7.63323                     | T down vs N                            | 36.162  | 38.6926   | 17.1199    | 1         |
| cg05254143  | DENND1A                                                                | 0.00135498        | 0.00135498           | 0.327836           | -3.0503                      | T down vs N                            | 14.982  | 11.6493   | 12.4408    | 1         |
| cg05254518  | AKAP13;AKAP13;AKAP13                                                   | 5.18E-07          | 5.18E-07             | 0.181692           | -5.50382                     | T down vs N                            | 64.67   | 27.2418   | 6.73992    | 1         |
| cg05255351  | LPCAT1                                                                 | 0.00056987        | 0.000569871          | 0.242942           | -4.1162                      | T down vs N                            | 18.349  | 18.7513   | 16.351     | 1         |
| cg05255580  | ANKRD24                                                                | 0.00574467        | 0.00574467           | 0.318084           | -3.14382                     | T down vs N                            | 10.15   | 12.2887   | 19.3706    | 1         |
| cg05255811  | KCNK5                                                                  | 0.00015042        | 0.000150424          | 0.326037           | -3.06714                     | T down vs N                            | 24.316  | 11.7645   | 7.74125    | 1         |
| cg05256420  | JAKMIP3                                                                | 3.18E-05          | 3.18E-05             | 0.267093           | -3.74401                     | T down vs N                            | 32.686  | 16.3235   | 7.99051    | 1         |
| cg05257372  | MAGEC2                                                                 | 0.00046698        | 0.000466977          | 0.325339           | -3.07372                     | T down vs N                            | 19.178  | 11.8096   | 9.85285    | 1         |
| cg05258079  | ACADM;ACADM                                                            | 6.34E-05          | 6.34E-05             | 0.315424           | -3.17033                     | T down vs N                            | 28.765  | 12.4695   | 6.93586    | 1         |
| cg05260469  | ASPH;ASPH;ASPH;ASPH;ASPH                                               | 0.00025331        | 0.000253308          | 0.264205           | -3.78494                     | T down vs N                            | 21.859  | 16.5935   | 12.1456    | 1         |
| cg05261824  | ZNF165;ZNF165<br>TAGAP;TAGAP;TAGAP;TAGAP;TAGAP;                        | 0.0012269         | 0.0012269            | 0.255184           | -3.91875                     | T down vs N                            | 15.349  | 17.471    | 18.2118    | 1         |
| cg05262335  | TAGAP                                                                  | 1.09E-06          | 1.09E-06             | 0.177852           | -5.62264                     | T down vs N                            | 57.646  | 27.9284   | 7.75171    | 1         |
| cg05265849  | IL6                                                                    | 3.18E-06          | 3.18E-06             | 0.243615           | -4.10484                     | T down vs N                            | 48.528  | 18.6782   | 6.15827    | 1         |
| cg05266816  | TRIM10;TRIM10                                                          | 0.00131686        | 0.00131686           | 0.331216           | -3.01918                     | T down vs N                            | 15.087  | 11.436    | 12.128     | 1         |
| cg05267543  | EFNA4;EFNA4;EFNA4                                                      | 2.59E-05          | 2.59E-05             | 0.241358           | -4.14323                     | T down vs N                            | 33.911  | 18.9252   | 8.92942    | 1         |
| cg05272921  | LOC90246                                                               | 0.00042548        | 0.000425477          | 0.265922           | -3.76051                     | T down vs N                            | 19.572  | 16.4324   | 13.4333    | 1         |
| cg05273302  | C19orf36;MOBK2A;C19orf36                                               | 9.94E-05          | 9.94E-05             | 0.277402           | -3.60487                     | T down vs N                            | 26.389  | 15.4004   | 9.33758    | 1         |
| cg05274323  | D4S234E;D4S234E                                                        | 0.00011495        | 0.000114945          | 3.9647             | 3.9647                       | T up vs N                              | 25.649  | 17.7705   | 11.0856    | 1         |
| cg05274650  | SERGEF                                                                 | 0.00092827        | 0.00092827           | 3.66987            | 3.66987                      | T up vs N                              | 16.406  | 15.8326   | 15.4408    | 1         |
| cg05274680  | CDH4                                                                   | 0.00050652        | 0.000506515          | 0.263942           | -3.78871                     | T down vs N                            | 18.837  | 16.6183   | 14.1157    | 1         |
| cg05275752  | GALM                                                                   | 0.00020003        | 0.000200034          | 0.32668            | -3.0611                      | T down vs N                            | 22.952  | 11.7232   | 8.17232    | 1         |
| cg05277096  | PDXRN3                                                                 | 1.62E-05          | 1.62E-05             | 0.24952            | -4.0077                      | T down vs N                            | 36.845  | 18.05     | 7.83834    | 1         |
| cg05277329  | FHOD1                                                                  | 0.00115584        | 0.00115584           | 0.2855             | -3.50262                     | T down vs N                            | 15.572  | 14.717    | 15.1215    | 1         |
| cg05278074  | CDK6;CDK6                                                              | 3.77E-05          | 3.77E-05             | 0.186833           | -5.35239                     | T down vs N                            | 31.682  | 26.3578   | 13.311     | 1         |
| cg05281206  | CCL13                                                                  | 5.38E-05          | 5.38E-05             | 0.208023           | -4.80715                     | T down vs N                            | 29.67   | 23.0897   | 12.4514    | 1         |
| cg05281894  | PDPN;PDPN;PDPN;PDPN                                                    | 0.00313028        | 0.00313028           | 13.4366            | 13.4366                      | T up vs N                              | 12.069  | 63.2169   | 83.8055    | 1         |
| cg05283453  | HGS                                                                    | 0.00044414        | 0.000444138          | 0.252333           | -3.96302                     | T down vs N                            | 19.39   | 17.7596   | 14.655     | 1         |
| cg05285759  | TBCK;TBCK;TBCK;TBCK                                                    | 0.00035911        | 0.000359113          | 0.221741           | -4.50977                     | T down vs N                            | 20.303  | 21.2497   | 16.7458    | 1         |
| cg05287314  | FAM110A;FAM110A                                                        | 0.00017471        | 0.00017471           | 3.33106            | 3.33106                      | T up vs N                              | 23.593  | 13.5614   | 9.19671    | 1         |
| cg05288071  | STXBP2;STXBP2                                                          | 3.27E-05          | 3.27E-05             | 0.162473           | -6.15485                     | T down vs N                            | 32.525  | 30.9305   | 15.2158    | 1         |
| cg05290274  | KRT34                                                                  | 2.36E-08          | 2.36E-08             | 0.147741           | -6.76858                     | T down vs N                            | 102.21  | 34.2507   | 5.36143    | 1         |
| cg05290737  | GPR81                                                                  | 3.87E-06          | 3.87E-06             | 0.278354           | -3.59255                     | T down vs N                            | 46.981  | 15.3183   | 5.21685    | 1         |
| cg05291025  | NEU2                                                                   | 0.00107737        | 0.00107737           | 0.281356           | -3.55421                     | T down vs N                            | 15.837  | 15.0623   | 15.2175    | 1         |
| cg05292376  | AATK                                                                   | 0.00010646        | 0.000106459          | 3.274              | 3.274                        | T up vs N                              | 26.037  | 13.1747   | 8.09598    | 1         |
| cg05292478  | SMURF1;SMURF1                                                          | 0.00080432        | 0.000804316          | 0.20896            | -4.7856                      | T down vs N                            | 16.964  | 22.9577   | 21.6531    | 1         |
| cg05294455  | MYL4;MYL4                                                              | 6.61E-06          | 6.61E-06             | 0.272828           | -3.66531                     | T down vs N                            | 42.984  | 15.8024   | 5.88209    | 1         |
| cg05296057  | TLE2;TLE2;TLE2                                                         | 1.19E-05          | 1.19E-05             | 0.201139           | -4.97168                     | T down vs N                            | 38.89   | 24.0901   | 9.91106    | 1         |
| cg05296940  | PAOX;PAOX;PAOX                                                         | 0.00335806        | 0.00335806           | 3.26096            | 3.26096                      | T up vs N                              | 11.839  | 13.0862   | 17.6852    | 1         |
| cg05297666  | ETS1                                                                   | 3.12E-05          | 3.12E-05             | 0.253344           | -3.9472                      | T down vs N                            | 32.787  | 17.6566   | 8.61642    | 1         |
| cg05297854  | TRABD                                                                  | 1.83E-05          | 1.83E-05             | 32.1764            | 32.1764                      | T up vs N                              | 36.064  | 112.857   | 50.0697    | 1         |
| cg05298628  | VPS37B                                                                 | 0.00072999        | 0.000729992          | 3.52535            | 3.52535                      | T up vs N                              | 17.348  | 14.8692   | 13.7142    | 1         |
| cg05298677  | ETV7                                                                   | 6.38E-05          | 6.38E-05             | 34.1222            | 34.1222                      | T up vs N                              | 28.73   | 116.707   | 64.9959    | 1         |
| cg05299278  | SLFN14                                                                 | 6.04E-06          | 6.04E-06             | 0.152729           | -6.54754                     | T down vs N                            | 43.639  | 33.0717   | 12.1255    | 1         |
| cg05302896  | C7orf66                                                                | 0.00041652        | 0.000416516          | 0.308657           | -3.23984                     | T down vs N                            | 19.663  | 12.9427   | 10.5316    | 1         |
| cg05304177  | AMOTL2                                                                 | 0.00186165        | 0.00186165           | 0.18936            | -5.28094                     | T down vs N                            | 13.839  | 25.9372   | 29.9871    | 1         |
| cg05304507  | FRK                                                                    | 4.14E-05          | 4.14E-05             | 0.200121           | -4.99697                     | T down vs N                            | 31.138  | 24.2428   | 12.457     | 1         |
| cg05304729  | MNDA                                                                   | 3.10E-07          | 3.10E-07             | 0.137329           | -7.28179                     | T down vs N                            | 69.941  | 36.9188   | 8.44567    | 1         |
| cg05305155  | PTPRN2;PTPRN2;PTPRN2                                                   | 0.00093122        | 0.00093122           | 0.185689           | -5.38534                     | T down vs N                            | 16.394  | 26.551    | 25.9134    | 1         |
| cg05306310  | RIPK4                                                                  | 4.80E-05          | 4.80E-05             | 6.82564            | 6.82564                      | T up vs N                              | 30.298  | 34.5521   | 18.2464    | 1         |
| cg05308117  | CABP5                                                                  | 0.00019846        | 0.000198461          | 0.275567           | -3.62889                     | T down vs N                            | 22.989  | 15.5603   | 10.8297    | 1         |
| cg05310185  | TACC2;TACC2;TACC2;TACC2                                                | 5.72E-05          | 5.72E-05             | 0.243966           | -4.09892                     | T down vs N                            | 29.33   | 18.64     | 10.1686    | 1         |
| cg05314142  | SLC22A1;SLC22A1                                                        | 6.76E-05          | 6.76E-05             | 0.256197           | -3.90325                     | T down vs N                            | 28.414  | 17.3698   | 9.78091    | 1         |
| cg05315796  | DNAH1                                                                  | 1.36E-05          | 1.36E-05             | 0.180292           | -5.54656                     | T down vs N                            | 38.012  | 27.4895   | 11.5709    | 1         |
| cg05316065  | GSDMC;GSDMC                                                            | 0.00021134        | 0.00021134           | 0.317159           | -3.15299                     | T down vs N                            | 22.695  | 12.3512   | 8.70778    | 1         |
| cg05316601  | MMP26                                                                  | 6.39E-05          | 6.39E-05             | 0.305791           | -3.2702                      | T down vs N                            | 28.718  | 13.1489   | 7.32589    | 1         |
| cg05320945  | OR7C1                                                                  | 0.00023768        | 0.000237675          | 0.303725           | -3.29246                     | T down vs N                            | 22.151  | 13.2999   | 9.60673    | 1         |
| cg05322019  | SEMA4G;SEMA4G                                                          | 8.96E-05          | 8.96E-05             | 0.258379           | -3.87028                     | T down vs N                            | 26.924  | 17.1541   | 10.1943    | 1         |
| cg05327268  | TBRG4;TBRG4;TBRG4                                                      | 0.00552007        | 0.00552007           | 0.266274           | -3.75553                     | T down vs N                            | 10.272  | 16.3996   | 25.5453    | 1         |

| Probeset ID                     | UCSC_REFGENE_NAME       | p-value<br>(Type) | p-value (T vs.<br>N) | Ratio (T<br>vs. N) | Fold-<br>Change (T<br>vs. N) | Fold-Change (T vs.<br>N) (Description) | F(Type) | SS (Type) | SS (Error) | F (Error) |
|---------------------------------|-------------------------|-------------------|----------------------|--------------------|------------------------------|----------------------------------------|---------|-----------|------------|-----------|
| cg05328057                      | CDH5                    | 2.25E-06          | 2.25E-06             | 3.31025            | 3.31025                      | T up vs N                              | 51.312  | 13.4205   | 4.18472    | 1         |
| cg05328461                      | EIF3G                   | 0.00011777        | 0.000117765          | 0.326758           | -3.06037                     | T down vs N                            | 25.527  | 11.7182   | 7.34493    | 1         |
| cg05329352                      | ADRA2A                  | 2.87E-05          | 2.87E-05             | 3.51708            | 3.51708                      | T up vs N                              | 33.297  | 14.8139   | 7.11844    | 1         |
| cg05329893                      | AMTN;AMTN               | 3.18E-06          | 3.18E-06             | 0.163343           | -6.12209                     | T down vs N                            | 48.515  | 30.7491   | 10.1409    | 1         |
| cg05330121                      | C10orf41;C10orf41       | 0.00010012        | 0.000100115          | 4.7716             | 4.7716                       | T up vs N                              | 26.351  | 22.8719   | 13.8876    | 1         |
| cg05333146                      | B3GNT9                  | 5.86E-08          | 5.86E-08             | 4.60207            | 4.60207                      | T up vs N                              | 89.612  | 21.8252   | 3.89684    | 1         |
| cg05335315                      | JAG2;JAG2               | 0.00165216        | 0.00165216           | 4.59576            | 4.59576                      | T up vs N                              | 14.263  | 21.786    | 24.439     | 1         |
| cg05335893                      | THADA;THADA             | 5.56E-05          | 5.56E-05             | 0.306587           | -3.26171                     | T down vs N                            | 29.479  | 13.0913   | 7.10554    | 1         |
| cg05335975                      | JPH4;JPH4               | 0.00010908        | 0.000109078          | 3.34205            | 3.34205                      | T up vs N                              | 25.914  | 13.6357   | 8.4192     | 1         |
| cg05337177                      | HLA-DPB2                | 0.00612528        | 0.00612528           | 4.4956             | 4.4956                       | T up vs N                              | 9.9566  | 21.161    | 34.0052    | 1         |
| cg05337441                      | APOB                    | 0.00064582        | 0.00064582           | 4.29101            | 4.29101                      | T up vs N                              | 17.839  | 19.8699   | 17.8216    | 1         |
| cg05338083                      | BIRC3;BIRC3             | 1.44E-05          | 1.44E-05             | 0.318887           | -3.1359                      | T down vs N                            | 37.607  | 12.2346   | 5.2052     | 1         |
| PHACTR2;PHACTR2;PHACTR2;PHACTR2 |                         |                   |                      |                    |                              |                                        |         |           |            |           |
| cg05341786                      | 2                       | 2.48E-06          | 2.48E-06             | 0.169777           | -5.89008                     | T down vs N                            | 50.514  | 29.4518   | 9.32874    | 1         |
| cg05342835                      | SYNC;SYNC               | 0.00045265        | 0.000452651          | 0.279174           | -3.582                       | T down vs N                            | 19.309  | 15.2479   | 12.6348    | 1         |
| cg05343289                      | SELP                    | 0.00234825        | 0.00234825           | 0.308911           | -3.23718                     | T down vs N                            | 13.033  | 12.9246   | 15.8666    | 1         |
| cg05343512                      | OR10AG1                 | 5.86E-06          | 5.86E-06             | 0.209087           | -4.7827                      | T down vs N                            | 43.859  | 22.94     | 8.3686     | 1         |
| cg05343811                      | NEK9                    | 0.0051401         | 0.0051401            | 0.166638           | -6.00103                     | T down vs N                            | 10.49   | 30.0749   | 45.8712    | 1         |
| cg05345154                      | AMH                     | 6.64E-05          | 6.64E-05             | 8.09636            | 8.09636                      | T up vs N                              | 28.509  | 40.9677   | 22.9921    | 1         |
| cg05345823                      | MUC6                    | 0.00233474        | 0.00233474           | 0.293125           | -3.41152                     | T down vs N                            | 13.053  | 14.1046   | 17.2891    | 1         |
| cg05345876                      | ZNF423                  | 0.000144          | 0.000144002          | 0.289734           | -3.45144                     | T down vs N                            | 24.529  | 14.3734   | 9.37571    | 1         |
| cg05346286                      | FLJ42875                | 4.57E-05          | 4.57E-05             | 4.11871            | 4.11871                      | T up vs N                              | 30.576  | 18.7675   | 9.82088    | 1         |
| cg05347898                      | KAAG1;KAAG1;DCDC2       | 0.00378407        | 0.00378407           | 4.87609            | 4.87609                      | T up vs N                              | 11.453  | 23.5104   | 32.8445    | 1         |
| cg05348216                      | PRSS16                  | 2.18E-05          | 2.18E-05             | 0.287793           | -3.47471                     | T down vs N                            | 34.978  | 14.5297   | 6.6464     | 1         |
| cg05349159                      | OR2C3;LOC148824         | 0.00048829        | 0.000488286          | 0.273762           | -3.65281                     | T down vs N                            | 18.99   | 15.7194   | 13.2444    | 1         |
| cg05350360                      | HDGF2;HDGF2             | 0.00086237        | 0.000862374          | 0.092701           | -10.7873                     | T down vs N                            | 16.691  | 52.9812   | 50.7866    | 1         |
| cg05353481                      | OR2A2                   | 0.00548169        | 0.00548169           | 0.294099           | -3.40022                     | T down vs N                            | 10.293  | 14.0285   | 21.8067    | 1         |
| cg05353872                      | ORM3                    | 1.04E-05          | 1.04E-05             | 0.101065           | -9.89466                     | T down vs N                            | 39.832  | 49.2027   | 19.7639    | 1         |
| cg05356496                      | SLC26A4;LOC286002       | 1.19E-05          | 1.19E-05             | 3.91983            | 3.91983                      | T up vs N                              | 38.906  | 17.4781   | 7.18791    | 1         |
| cg05356778                      | WBSR17                  | 4.64E-05          | 4.64E-05             | 0.230576           | -4.33697                     | T down vs N                            | 30.494  | 20.1617   | 10.5788    | 1         |
| cg05356998                      | DTNBP1;DTNBP1;DTNBP1    | 5.06E-06          | 5.06E-06             | 0.214672           | -4.65827                     | T down vs N                            | 44.954  | 22.1737   | 7.8921     | 1         |
| UGT1A6;UGT1A10;UGT1A9;UGT1A6;U  |                         |                   |                      |                    |                              |                                        |         |           |            |           |
| cg05357229                      | GT1A7;UGT1A8            | 3.22E-05          | 3.22E-05             | 0.191117           | -5.23239                     | T down vs N                            | 32.605  | 25.6501   | 12.5871    | 1         |
| cg05359237                      | CHRNA2                  | 6.67E-05          | 6.67E-05             | 0.263735           | -3.79168                     | T down vs N                            | 28.485  | 16.6379   | 9.3454     | 1         |
| cg05359249                      | CHPF                    | 0.00040193        | 0.000401928          | 15.2147            | 15.2147                      | T up vs N                              | 19.816  | 69.4098   | 56.0438    | 1         |
| cg05359518                      | TCF12;TCF12;TCF12;TCF12 | 0.00075766        | 0.000757664          | 0.329919           | -3.03105                     | T down vs N                            | 17.2    | 11.5174   | 10.714     | 1         |
| cg05360958                      | MGP                     | 0.00223081        | 0.00223081           | 0.330805           | -3.02293                     | T down vs N                            | 13.209  | 11.4617   | 13.8833    | 1         |
| cg05361272                      | SUGT1L1;MIR621;SLC25A15 | 9.67E-05          | 9.67E-05             | 0.20706            | -4.82953                     | T down vs N                            | 26.53   | 23.2265   | 14.0079    | 1         |
| cg05361366                      | INPP4B;INPP4B           | 5.10E-05          | 5.10E-05             | 0.244078           | -4.09705                     | T down vs N                            | 29.962  | 18.6279   | 9.94756    | 1         |
| cg05364164                      | KCNH2;KCNH2             | 0.0003484         | 0.000348395          | 3.04402            | 3.04402                      | T up vs N                              | 20.436  | 11.6063   | 9.08704    | 1         |
| cg05364710                      | ZNF548                  | 0.00080227        | 0.000802267          | 0.26627            | -3.75558                     | T down vs N                            | 16.974  | 16.3999   | 15.4588    | 1         |
| cg05364747                      | OBSCN;OBSCN             | 0.00095208        | 0.000952083          | 0.194705           | -5.13598                     | T down vs N                            | 16.308  | 25.0768   | 24.6026    | 1         |
| cg05365532                      | LILRB1                  | 4.00E-06          | 4.00E-06             | 0.206731           | -4.8372                      | T down vs N                            | 46.727  | 23.2733   | 7.96915    | 1         |
| cg05365670                      | LPCAT1                  | 9.82E-05          | 9.82E-05             | 3.62912            | 3.62912                      | T up vs N                              | 26.452  | 15.5618   | 9.41275    | 1         |
| cg05365735                      | FZD5                    | 3.36E-05          | 3.36E-05             | 6.79974            | 6.79974                      | T up vs N                              | 32.36   | 34.4155   | 17.0161    | 1         |
| cg05366052                      | APOBEC1                 | 2.16E-07          | 2.16E-07             | 0.158434           | -6.31178                     | T down vs N                            | 73.897  | 31.7935   | 6.88389    | 1         |
| cg05368971                      | MORN1                   | 0.00074397        | 0.000743965          | 0.313825           | -3.18649                     | T down vs N                            | 17.272  | 12.5796   | 11.6531    | 1         |
| cg05371552                      | VIPR2                   | 0.00017871        | 0.000178714          | 3.94402            | 3.94402                      | T up vs N                              | 23.485  | 17.6359   | 12.0149    | 1         |
| cg05372265                      | PABPC1L                 | 0.00013418        | 0.000134176          | 0.287414           | -3.4793                      | T down vs N                            | 24.876  | 14.5605   | 9.36502    | 1         |
| cg05372365                      | WBP1                    | 0.00156734        | 0.00156734           | 0.231214           | -4.325                       | T down vs N                            | 14.452  | 20.0858   | 22.2366    | 1         |
| cg05372828                      | KCNAB2;KCNAB2           | 0.00018272        | 0.000182718          | 0.244258           | -4.09404                     | T down vs N                            | 23.38   | 18.6085   | 12.7347    | 1         |
| cg05373339                      | TUG1;MORC2              | 0.00034574        | 0.000345735          | 3.13272            | 3.13272                      | T up vs N                              | 21.177  | 11.4945   | 8.14186    | 1         |
| cg05374396                      | TEX101;TEX101           | 0.00016635        | 0.000166348          | 0.250787           | -3.98745                     | T down vs N                            | 23.829  | 17.9185   | 12.0316    | 1         |
| cg05374809                      | C14orf23                | 0.00010224        | 0.000102244          | 0.166415           | -6.00909                     | T down vs N                            | 26.243  | 30.12     | 18.3636    | 1         |
| cg05376185                      | MOBK12C                 | 0.00189756        | 0.00189756           | 0.331824           | -3.01365                     | T down vs N                            | 13.772  | 11.3981   | 13.2421    | 1         |
| cg05376267                      | LEFTY1                  | 4.40E-06          | 4.40E-06             | 6.54621            | 6.54621                      | T up vs N                              | 46.013  | 33.0645   | 11.4976    | 1         |
| cg05376405                      | E2F4;EXOC3L             | 9.88E-06          | 9.88E-06             | 0.305122           | -3.27738                     | T down vs N                            | 40.152  | 13.1976   | 5.25901    | 1         |
| cg05376982                      | GSTM5                   | 0.00025673        | 0.000256734          | 4.14588            | 4.14588                      | T up vs N                              | 21.798  | 18.9422   | 13.9037    | 1         |
| cg05380455                      | CAMTA1                  | 7.09E-05          | 7.09E-05             | 0.326806           | -3.05992                     | T down vs N                            | 28.16   | 11.7151   | 6.65643    | 1         |
| cg05381287                      | CAMTA1                  | 0.00062009        | 0.000620086          | 0.208394           | -4.79861                     | T down vs N                            | 18.004  | 23.0375   | 20.4735    | 1         |
| cg05381960                      | JTB;CREB3L4             | 8.65E-06          | 8.65E-06             | 0.168985           | -5.91767                     | T down vs N                            | 41.073  | 29.6072   | 11.5336    | 1         |
| cg05382137                      | MIR527                  | 0.00012545        | 0.000125454          | 0.296686           | -3.37057                     | T down vs N                            | 25.21   | 13.8284   | 8.77644    | 1         |
| cg05382782                      | TMPSRSS13               | 5.66E-06          | 5.66E-06             | 0.17703            | -5.64875                     | T down vs N                            | 44.124  | 28.0785   | 10.1816    | 1         |
| cg05384123                      | FOXP1;FOXP1             | 0.00189484        | 0.00189484           | 0.312815           | -3.19678                     | T down vs N                            | 13.777  | 12.6497   | 14.6909    | 1         |
| cg05384450                      | CBX4                    | 0.00106774        | 0.00106774           | 0.310776           | -3.21775                     | T down vs N                            | 15.871  | 12.7925   | 12.8966    | 1         |
| cg05385188                      | CSNK1D;CSNK1D           | 0.00115379        | 0.00115379           | 3.42691            | 3.42691                      | T up vs N                              | 15.579  | 14.2083   | 14.5926    | 1         |
| cg05385306                      | ACCN5                   | 0.00168429        | 0.00168429           | 0.216194           | -4.62548                     | T down vs N                            | 14.194  | 21.9705   | 24.7656    | 1         |
| cg05385434                      | EPHX1                   | 0.0011739         | 0.0011739            | 3.2185             | 3.2185                       | T up vs N                              | 15.514  | 12.7976   | 13.1985    | 1         |
| cg05387167                      | HOXB3                   | 0.00055344        | 0.000553441          | 5.89669            | 5.89669                      | T up vs N                              | 18.469  | 29.489    | 25.5465    | 1         |
| cg05388137                      | TCHHL1                  | 6.87E-06          | 6.87E-06             | 0.114047           | -8.76829                     | T down vs N                            | 42.705  | 44.1507   | 16.5419    | 1         |
| cg05389989                      | TRIM40                  | 0.00034635        | 0.000346353          | 0.215926           | -4.63122                     | T down vs N                            | 20.461  | 22.0061   | 17.2079    | 1         |
| cg05391002                      | TRIM6                   | 0.0001673         | 0.000167296          | 0.227305           | -4.39937                     | T down vs N                            | 23.801  | 20.5562   | 13.8186    | 1         |

| Probeset ID                                                     | UCSC_REFGENE_NAME             | p-value<br>(Type) | p-value (T vs.<br>N) | Ratio (T<br>vs. N) | Fold-<br>Change (T<br>vs. N) | Fold-Change (T vs.<br>N) (Description) | F(Type) | SS (Type) | SS (Error) | F (Error) |
|-----------------------------------------------------------------|-------------------------------|-------------------|----------------------|--------------------|------------------------------|----------------------------------------|---------|-----------|------------|-----------|
| ARHGAP25;ARHGAP25;ARHGAP25;AR                                   |                               |                   |                      |                    |                              |                                        |         |           |            |           |
| cg05395210                                                      | HGAP25                        | 1.10E-06          | 1.10E-06             | 0.143285           | -6.97911                     | T down vs N                            | 57.508  | 35.3567   | 9.83698    | 1         |
| cg05395476                                                      | DNAH3                         | 0.00183145        | 0.00183145           | 0.308764           | -3.23872                     | T down vs N                            | 13.897  | 12.935    | 14.8927    | 1         |
| cg05395998                                                      | SNIP1                         | 0.0006231         | 0.000623101          | 0.305886           | -3.26919                     | T down vs N                            | 17.984  | 13.142    | 11.6922    | 1         |
| cg05396212                                                      | KRT19                         | 7.02E-06          | 7.02E-06             | 7.07668            | 7.07668                      | T up vs N                              | 42.554  | 35.8638   | 13.4846    | 1         |
| cg05398095                                                      | YOD1                          | 1.06E-05          | 1.06E-05             | 0.224188           | -4.46054                     | T down vs N                            | 39.642  | 20.9412   | 8.45211    | 1         |
| cg05398580                                                      | C7orf52                       | 5.66E-05          | 5.66E-05             | 4.24615            | 4.24615                      | T up vs N                              | 29.389  | 19.5842   | 10.662     | 1         |
| cg05399214                                                      | SYT7                          | 0.00072241        | 0.000722414          | 0.188814           | -5.29621                     | T down vs N                            | 17.389  | 26.0273   | 23.9482    | 1         |
| cg05399703                                                      | ACSBG1                        | 6.75E-05          | 6.75E-05             | 0.315898           | -3.16558                     | T down vs N                            | 28.426  | 12.4371   | 7.00039    | 1         |
| cg05401447                                                      | TRIM56                        | 0.00692148        | 0.00692148           | 0.224419           | -4.45596                     | T down vs N                            | 9.7794  | 19.6822   | 30.1892    | 1         |
| cg05402062                                                      | OR4S1                         | 1.01E-05          | 1.01E-05             | 0.317929           | -3.14535                     | T down vs N                            | 39.971  | 12.2991   | 4.92323    | 1         |
| cg05402364                                                      | OR4K2                         | 0.00100788        | 0.00100788           | 0.291616           | -3.42917                     | T down vs N                            | 16.09   | 14.2235   | 14.1438    | 1         |
| cg05402891                                                      | TCL1B;TCL1B                   | 0.00013477        | 0.000134765          | 0.234166           | -4.27048                     | T down vs N                            | 24.855  | 19.7393   | 12.707     | 1         |
| cg05406635                                                      | CCDC85C                       | 0.00032171        | 0.000321706          | 5.73405            | 5.73405                      | T up vs N                              | 20.786  | 28.5667   | 21.9889    | 1         |
| cg05413258                                                      | RBM44                         | 0.00105417        | 0.00105417           | 3.04641            | 3.04641                      | T up vs N                              | 15.919  | 11.6226   | 11.6815    | 1         |
| cg05413628                                                      | CLCN7;CLCN7                   | 0.00022386        | 0.000223864          | 0.251159           | -3.98154                     | T down vs N                            | 22.427  | 17.8801   | 12.7561    | 1         |
| cg05414074                                                      | USP37                         | 7.15E-06          | 7.15E-06             | 0.206406           | -4.84483                     | T down vs N                            | 42.424  | 23.3199   | 8.79498    | 1         |
| SNORD115-9;SNORD115-5;SNORD115-12;SNORD115-10                   |                               |                   |                      |                    |                              |                                        |         |           |            |           |
| cg05421651                                                      | NRGN;NRGN                     | 0.00027887        | 0.000278873          | 0.186188           | -5.37091                     | T down vs N                            | 21.424  | 26.4665   | 19.766     | 1         |
| cg05425213                                                      | NRGN;NRGN                     | 3.11E-05          | 3.11E-05             | 6.07836            | 6.07836                      | T up vs N                              | 32.821  | 30.5062   | 14.8717    | 1         |
| cg05427907                                                      | FAM83A;LOC100131726;FAM83A    | 0.00045852        | 0.000458517          | 0.332095           | -3.01119                     | T down vs N                            | 19.255  | 11.3812   | 9.45743    | 1         |
| cg05429895                                                      | TLR4;TLR4;TLR4;TLR4           | 2.54E-06          | 2.54E-06             | 0.103305           | -9.68007                     | T down vs N                            | 50.346  | 48.2658   | 15.339     | 1         |
| cg05431942                                                      | OR10A5                        | 0.0013007         | 0.0013007            | 0.326021           | -3.06729                     | T down vs N                            | 15.133  | 11.7656   | 12.4399    | 1         |
| JMJD7;MAPKBP1;MAPKBP1;JMJD7-                                    |                               |                   |                      |                    |                              |                                        |         |           |            |           |
| cg05432017                                                      | PLA2G4B;JMJD7-PLA2G4B         | 0.00055147        | 0.000551468          | 3.73951            | 3.73951                      | T up vs N                              | 18.484  | 16.2937   | 14.1041    | 1         |
| cg05433222                                                      | PON1                          | 0.00661297        | 0.00661297           | 0.277116           | -3.6086                      | T down vs N                            | 9.7274  | 15.4252   | 25.3719    | 1         |
| cg05433657                                                      | HKDC1                         | 0.00049186        | 0.000491861          | 0.229039           | -4.36607                     | T down vs N                            | 18.959  | 20.3458   | 17.17      | 1         |
| cg05439521                                                      | C6orf134                      | 0.00214281        | 0.00214281           | 0.254154           | -3.93463                     | T down vs N                            | 13.348  | 17.5746   | 21.0663    | 1         |
| cg05440289                                                      | IVL                           | 9.76E-08          | 9.76E-08             | 0.245654           | -4.07076                     | T down vs N                            | 83.143  | 18.4582   | 3.5521     | 1         |
| cg05440824                                                      | CCL2                          | 0.00015906        | 0.000159063          | 0.256196           | -3.90326                     | T down vs N                            | 24.045  | 17.3699   | 11.5585    | 1         |
| cg05442599                                                      | CYP4A22                       | 0.00639833        | 0.00639833           | 0.287658           | -3.47636                     | T down vs N                            | 9.8259  | 14.5408   | 23.6776    | 1         |
| cg05444620                                                      | IL17RA                        | 0.00323086        | 0.00323086           | 0.330458           | -3.0261                      | T down vs N                            | 11.965  | 11.4835   | 15.3555    | 1         |
| cg05445244                                                      | NPY1R                         | 2.44E-05          | 2.44E-05             | 0.256144           | -3.90406                     | T down vs N                            | 34.287  | 17.3751   | 8.10813    | 1         |
| LOC284798;LOC284798;LOC284798                                   |                               |                   |                      |                    |                              |                                        |         |           |            |           |
| cg05446860                                                      | C6orf123                      | 7.53E-06          | 7.53E-06             | 6.03823            | 6.03823                      | T up vs N                              | 42.051  | 30.2827   | 11.5222    | 1         |
| cg05447100                                                      | C6orf123                      | 1.73E-05          | 1.73E-05             | 0.283036           | -3.53312                     | T down vs N                            | 36.446  | 14.9213   | 6.5506     | 1         |
| cg05448404                                                      | CPLX1                         | 0.00067616        | 0.000676158          | 5.16831            | 5.16831                      | T up vs N                              | 17.654  | 25.2695   | 22.9022    | 1         |
| cg05449136                                                      | LOC389333                     | 0.00013249        | 0.000132487          | 9.02212            | 9.02212                      | T up vs N                              | 24.939  | 45.319    | 29.075     | 1         |
| cg05452066                                                      | SIL1;SIL1                     | 0.00107041        | 0.00107041           | 0.307841           | -3.24843                     | T down vs N                            | 15.861  | 13.001    | 13.1147    | 1         |
| cg05452406                                                      | GCM2                          | 0.00152354        | 0.00152354           | 7.94808            | 7.94808                      | T up vs N                              | 14.555  | 40.2468   | 44.2433    | 1         |
| cg05453618                                                      | MIR98;HUWE1;MIRLET7F2         | 0.00043804        | 0.000438043          | 0.215165           | -4.64759                     | T down vs N                            | 19.448  | 22.1076   | 18.1879    | 1         |
| cg05454501                                                      | ZBED3                         | 0.00570615        | 0.00570615           | 9.48517            | 9.48517                      | T up vs N                              | 10.171  | 47.4048   | 74.5742    | 1         |
| cg05454957                                                      | MYADML2                       | 0.00018954        | 0.000189536          | 0.298877           | -3.34586                     | T down vs N                            | 23.206  | 13.6614   | 9.4192     | 1         |
| COASY;COASY;COASY;COASY;COASY                                   |                               |                   |                      |                    |                              |                                        |         |           |            |           |
| cg05465955                                                      | COASY;COASY;COASY;COASY;COASY | 1.13E-05          | 1.13E-05             | 0.06367            | -15.7059                     | T down vs N                            | 39.216  | 71.0397   | 28.9838    | 1         |
| cg05468303                                                      | DGCR6                         | 9.41E-05          | 9.41E-05             | 3.18756            | 3.18756                      | T up vs N                              | 26.67   | 12.5869   | 7.55119    | 1         |
| cg05469591                                                      | ANKRD34C                      | 0.00069881        | 0.000698806          | 0.291006           | -3.43635                     | T down vs N                            | 17.522  | 14.2719   | 13.0324    | 1         |
| cg05472934                                                      | IL6                           | 7.77E-11          | 7.77E-11             | 0.116374           | -8.59301                     | T down vs N                            | 224.48  | 43.3333   | 3.08864    | 1         |
| cg05475524                                                      | ACTN3                         | 2.76E-05          | 2.76E-05             | 0.128493           | -7.78252                     | T down vs N                            | 33.54   | 39.4335   | 18.8116    | 1         |
| cg05477920                                                      | SLC10A7                       | 1.33E-05          | 1.33E-05             | 0.299024           | -3.34421                     | T down vs N                            | 38.153  | 13.6503   | 5.72438    | 1         |
| cg05478452                                                      | FAM38B                        | 1.12E-05          | 1.12E-05             | 5.67341            | 5.67341                      | T up vs N                              | 39.269  | 28.2199   | 11.498     | 1         |
| cg05479556                                                      | EXOC3                         | 0.00021543        | 0.000215428          | 0.290277           | -3.44499                     | T down vs N                            | 22.605  | 14.33     | 10.1427    | 1         |
| cg05480377                                                      | ONECUT2                       | 4.32E-06          | 4.32E-06             | 0.245589           | -4.07184                     | T down vs N                            | 46.14   | 18.4652   | 6.40321    | 1         |
| cg05480623                                                      | TAP1                          | 0.00032746        | 0.000327463          | 0.314726           | -3.17737                     | T down vs N                            | 20.708  | 12.5175   | 9.67165    | 1         |
| cg05482119                                                      | LAMB2L                        | 4.87E-06          | 4.87E-06             | 0.16938            | -5.90389                     | T down vs N                            | 45.243  | 29.5296   | 10.4431    | 1         |
| cg05482413                                                      | MOXD2                         | 9.63E-06          | 9.63E-06             | 0.291886           | -3.426                       | T down vs N                            | 40.328  | 14.2022   | 5.63461    | 1         |
| cg05483199                                                      | LOC100132963                  | 0.00017294        | 0.000172942          | 0.321844           | -3.1071                      | T down vs N                            | 23.642  | 12.0378   | 8.14675    | 1         |
| cg05483731                                                      | GALNT9                        | 1.08E-05          | 1.08E-05             | 0.13797            | -7.24798                     | T down vs N                            | 39.542  | 36.7459   | 14.8688    | 1         |
| cg05484548                                                      | RRN3P2                        | 0.00086303        | 0.000863027          | 0.132419           | -7.55179                     | T down vs N                            | 16.688  | 38.2852   | 36.7059    | 1         |
| cg05487664                                                      | LRRC10B                       | 0.00034111        | 0.000341111          | 3.51622            | 3.51622                      | T up vs N                              | 20.528  | 14.8081   | 11.5416    | 1         |
| cg05488632                                                      | EPHX3;EPHX3;EPHX3             | 3.34E-05          | 3.34E-05             | 3.57479            | 3.57479                      | T up vs N                              | 32.39   | 15.1998   | 7.50846    | 1         |
| cg05493841                                                      | BEST3;BEST3                   | 0.00045152        | 0.000451517          | 0.249398           | -4.00965                     | T down vs N                            | 19.32   | 18.0626   | 14.9589    | 1         |
| PCDHGB5;PCDHGC3;PCDHGA6;PCDHG<br>B4;PCDHGA8;PCDHGA12;PCDHGB3;PC |                               |                   |                      |                    |                              |                                        |         |           |            |           |
| cg05494467                                                      | DHGA5;PCDHGA1;PCDHGA11;PCDHG  | 0.00101634        | 0.00101634           | 4.44766            | 4.44766                      | T up vs N                              | 16.058  | 20.8602   | 20.7845    | 1         |
| cg05495391                                                      | FASTKD3                       | 0.00034531        | 0.000345307          | 0.329067           | -3.0389                      | T down vs N                            | 20.475  | 11.5711   | 9.04229    | 1         |
| cg05496203                                                      | MEIS1                         | 0.00175351        | 0.00175351           | 0.217513           | -4.59744                     | T down vs N                            | 14.051  | 21.7964   | 24.8201    | 1         |
| cg05498586                                                      | C16orf81                      | 0.00409388        | 0.00409388           | 0.185162           | -5.40069                     | T down vs N                            | 11.202  | 26.6408   | 38.0522    | 1         |
| cg05499890                                                      | AMPD1                         | 4.16E-05          | 4.16E-05             | 0.166688           | -5.99923                     | T down vs N                            | 31.114  | 30.0648   | 15.4605    | 1         |
| cg05500919                                                      | STX8                          | 3.35E-05          | 3.35E-05             | 0.312288           | -3.20218                     | T down vs N                            | 32.368  | 12.6865   | 6.27122    | 1         |
| cg05504194                                                      | ACAT2                         | 0.00546307        | 0.00546307           | 0.26636            | -3.75431                     | T down vs N                            | 10.303  | 16.3915   | 25.4543    | 1         |

| Probeset ID                      | UCSC_REFGENE_NAME               | p-value<br>(Type) | p-value (T vs.<br>N) | Ratio (T<br>vs. N) | Fold-<br>Change (T<br>vs. N) | Fold-Change (T vs.<br>N) (Description) | F(Type) | SS (Type) | SS (Error) | F (Error) |
|----------------------------------|---------------------------------|-------------------|----------------------|--------------------|------------------------------|----------------------------------------|---------|-----------|------------|-----------|
| cg05509659                       | ROBO3                           | 0.00670296        | 0.00670296           | 13.6058            | 13.6058                      | T up vs N                              | 9.6873  | 63.8273   | 105.421    | 1         |
| cg05511196                       | PDE7B                           | 4.03E-05          | 4.03E-05             | 0.32457            | -3.081                       | T down vs N                            | 31.305  | 11.8594   | 6.06141    | 1         |
| TNFSF12-                         |                                 |                   |                      |                    |                              |                                        |         |           |            |           |
| cg05514680                       | TNFSF13;TNFSF13;TNFSF13;TNFSF13 | 0.00064647        | 0.000646471          | 0.305618           | -3.27206                     | T down vs N                            | 17.835  | 13.1615   | 11.8075    | 1         |
| cg05516390                       | ZFHx3                           | 0.00190502        | 0.00190502           | 0.3106             | -3.21957                     | T down vs N                            | 13.758  | 12.8049   | 14.8914    | 1         |
| cg05516617                       | HOXA11                          | 8.88E-07          | 8.88E-07             | 0.297017           | -3.36681                     | T down vs N                            | 59.494  | 13.803    | 3.71213    | 1         |
| BRE;RBKS;LOC100302650;BRE;BRE;BR |                                 |                   |                      |                    |                              |                                        |         |           |            |           |
| cg05517527                       | E;BRE                           | 0.00016283        | 0.000162834          | 0.178522           | -5.60154                     | T down vs N                            | 23.931  | 27.8069   | 18.5911    | 1         |
| cg05521175                       | OBSL1                           | 3.35E-05          | 3.35E-05             | 0.290753           | -3.43935                     | T down vs N                            | 32.375  | 14.292    | 7.06326    | 1         |
| cg05521538                       | TERT;TERT                       | 1.24E-05          | 1.24E-05             | 0.148288           | -6.74361                     | T down vs N                            | 38.624  | 34.1185   | 14.1335    | 1         |
| cg05522011                       | PRDM8;PRDM8                     | 6.24E-06          | 6.24E-06             | 22.6618            | -2.6618                      | T up vs N                              | 43.403  | 91.2137   | 33.6248    | 1         |
| cg05524740                       | CNR2                            | 1.10E-05          | 1.10E-05             | 0.292847           | -3.41475                     | T down vs N                            | 39.416  | 14.1264   | 5.73429    | 1         |
| cg05525106                       | C6orf150                        | 0.0001355         | 0.000135497          | 0.206081           | -4.85246                     | T down vs N                            | 24.828  | 23.3665   | 15.0581    | 1         |
| cg05525368                       | CDC20                           | 1.44E-05          | 1.44E-05             | 0.173791           | -5.75404                     | T down vs N                            | 37.639  | 28.6807   | 12.192     | 1         |
| cg05525374                       | HLA-DMB                         | 0.0007219         | 0.000721898          | 0.278443           | -3.5914                      | T down vs N                            | 17.392  | 15.3106   | 14.0853    | 1         |
| cg05527185                       | THBS4                           | 2.48E-06          | 2.48E-06             | 0.252389           | -3.96215                     | T down vs N                            | 50.537  | 17.7539   | 5.62092    | 1         |
| cg05529816                       | CHRNAE;C17orf107                | 3.89E-06          | 3.89E-06             | 18.0004            | 18.0004                      | T up vs N                              | 46.94   | 78.2484   | 26.6716    | 1         |
| cg05530484                       | LOC162632                       | 0.00024409        | 0.000244085          | 0.328466           | -3.04446                     | T down vs N                            | 22.029  | 11.6092   | 8.43203    | 1         |
| cg05533037                       | KRTAP7-1                        | 0.00069402        | 0.000694019          | 0.252725           | -3.95687                     | T down vs N                            | 17.549  | 17.7196   | 16.1553    | 1         |
| cg05537653                       | C1QTNF4                         | 0.00678633        | 0.00678633           | 3.21093            | 3.21093                      | T up vs N                              | 9.6506  | 12.746    | 21.1321    | 1         |
| cg05543909                       | ZFHx3;ZFHx3                     | 0.00010397        | 0.000103969          | 0.293254           | -3.41002                     | T down vs N                            | 26.158  | 14.0945   | 8.62128    | 1         |
| cg05545891                       | OR8K1                           | 5.74E-05          | 5.74E-05             | 0.156357           | -6.39562                     | T down vs N                            | 29.307  | 32.2505   | 17.6071    | 1         |
| cg05546863                       | CMTM2                           | 8.77E-06          | 8.77E-06             | 5.3584             | 5.3584                       | T up vs N                              | 40.979  | 26.3931   | 10.3049    | 1         |
| cg05551114                       | C1QTNF7;C1QTNF7                 | 4.34E-05          | 4.34E-05             | 0.226614           | -4.41279                     | T down vs N                            | 30.87   | 20.6408   | 10.6981    | 1         |
| cg05553829                       | SDR16C6                         | 0.00018369        | 0.000183693          | 0.294528           | -3.39526                     | T down vs N                            | 23.355  | 13.9951   | 9.58792    | 1         |
| cg05554718                       | HIST1H1D                        | 5.58E-06          | 5.58E-06             | 0.293062           | -3.41225                     | T down vs N                            | 44.22   | 14.1096   | 5.10525    | 1         |
| cg05555515                       | PALM3                           | 4.41E-05          | 4.41E-05             | 0.282575           | -3.53889                     | T down vs N                            | 30.786  | 14.9598   | 7.77481    | 1         |
| cg05555633                       | GPX6                            | 1.39E-05          | 1.39E-05             | 0.287676           | -3.47613                     | T down vs N                            | 37.858  | 14.5393   | 6.14475    | 1         |
| cg05555951                       | OR8H2                           | 2.54E-05          | 2.54E-05             | 0.288285           | -3.46879                     | T down vs N                            | 34.04   | 14.4899   | 6.81079    | 1         |
| cg05563033                       | PCCA;PCCA                       | 0.00068679        | 0.000686788          | 0.245351           | -4.0758                      | T down vs N                            | 17.591  | 18.4908   | 16.8182    | 1         |
| cg05563515                       | RNF39;RNF39                     | 0.00027748        | 0.000277478          | 7.35385            | 7.35385                      | T up vs N                              | 21.446  | 37.2859   | 27.8171    | 1         |
| cg05564340                       | U2AF1;U2AF1;U2AF1               | 7.10E-05          | 7.10E-05             | 0.206865           | -4.83407                     | T down vs N                            | 28.151  | 23.2542   | 13.2167    | 1         |
| cg05567236                       | SDCCAG8;CEP170;CEP170;CEP170    | 0.00013182        | 0.000131821          | 0.307478           | -3.25227                     | T down vs N                            | 24.964  | 13.0271   | 8.34937    | 1         |
| cg05569109                       | GALNT3                          | 0.00696057        | 0.00696057           | 7.04552            | 7.04552                      | T up vs N                              | 9.5755  | 35.7023   | 59.6559    | 1         |
| cg05570079                       | MBTPS2                          | 0.00015333        | 0.000153325          | 0.2108             | -4.74384                     | T down vs N                            | 24.223  | 22.7015   | 14.9952    | 1         |
| cg05571310                       | KIF19                           | 5.82E-05          | 5.82E-05             | 3.58359            | 3.58359                      | T up vs N                              | 29.229  | 15.2585   | 8.35256    | 1         |
| cg05572627                       | OR8K3                           | 0.00077296        | 0.000772964          | 0.255803           | -3.90925                     | T down vs N                            | 17.121  | 17.409    | 16.2694    | 1         |
| cg05573019                       | DHX29                           | 0.00019964        | 0.000199637          | 0.200822           | -4.97954                     | T down vs N                            | 22.961  | 24.1376   | 16.8197    | 1         |
| cg05575393                       | VTI1A                           | 0.00117175        | 0.00117175           | 0.298684           | -3.34802                     | T down vs N                            | 15.521  | 13.6761   | 14.0983    | 1         |
| cg05576245                       | ZC3HAV1L                        | 0.00012431        | 0.000124314          | 0.317436           | -3.15024                     | T down vs N                            | 25.256  | 12.3325   | 7.81294    | 1         |
| cg05582397                       | CLEC4D                          | 0.00010888        | 0.000108877          | 0.262422           | -3.81066                     | T down vs N                            | 25.923  | 16.7627   | 10.3462    | 1         |
| cg05582719                       | RIMS1;RIMS1;RIMS1;RIMS1;RIMS1   | 0.00011104        | 0.000111038          | 0.206596           | -4.84036                     | T down vs N                            | 25.823  | 23.2927   | 14.4321    | 1         |
| cg05583053                       | MPV17L;MPV17L                   | 0.00151655        | 0.00151655           | 0.277189           | -3.60765                     | T down vs N                            | 14.571  | 15.4189   | 16.9307    | 1         |
| cg05584078                       | MS4A13;MS4A13                   | 5.10E-05          | 5.10E-05             | 0.183289           | -5.45586                     | T down vs N                            | 29.966  | 26.9629   | 14.3966    | 1         |
| cg05584950                       | ATOH8                           | 0.00064196        | 0.000641955          | 0.319542           | -3.12948                     | T down vs N                            | 17.863  | 12.1908   | 10.9192    | 1         |
| cg05585317                       | TSPYL2                          | 0.00630554        | 0.00630554           | 3.95936            | 3.95936                      | T up vs N                              | 9.8696  | 17.7358   | 28.7523    | 1         |
| cg05586457                       | GYPC;GYPC                       | 0.00042388        | 0.000423882          | 0.201556           | -4.9614                      | T down vs N                            | 19.588  | 24.028    | 19.6266    | 1         |
| cg05587394                       | KLHL29                          | 0.00216085        | 0.00216085           | 0.258355           | -3.87065                     | T down vs N                            | 13.319  | 17.1565   | 20.6098    | 1         |
| cg05587400                       | GDI2;GDI2                       | 0.00672765        | 0.00672765           | 0.322494           | -3.10083                     | T down vs N                            | 9.6763  | 11.995    | 19.834     | 1         |
| cg05590755                       | E2F2                            | 1.04E-05          | 1.04E-05             | 0.260728           | -3.83542                     | T down vs N                            | 39.776  | 16.9255   | 6.8084     | 1         |
| cg05596552                       | NAALADL1                        | 1.88E-05          | 1.88E-05             | 0.302842           | -3.30205                     | T down vs N                            | 35.907  | 13.3649   | 5.95532    | 1         |
| cg05597945                       | BANP;BANP                       | 3.77E-06          | 3.77E-06             | 0.217189           | -4.60429                     | T down vs N                            | 47.183  | 21.839    | 7.4058     | 1         |
| MOG;MOG;MOG;MOG;MOG;MOG;M        |                                 |                   |                      |                    |                              |                                        |         |           |            |           |
| cg05598246                       | OG;MOG;MOG;MOG;MOG              | 0.00209514        | 0.00209514           | 3.94071            | 3.94071                      | T up vs N                              | 13.426  | 17.6143   | 20.9913    | 1         |
| cg05598886                       | PKD1;MIR1225;PKD1               | 0.00626486        | 0.00626486           | 3.91506            | 3.91506                      | T up vs N                              | 9.889   | 17.4469   | 28.2285    | 1         |
| cg05599550                       | ABCC3;ABCC3                     | 3.28E-07          | 3.28E-07             | 0.229547           | -4.35641                     | T down vs N                            | 69.362  | 20.2848   | 4.67914    | 1         |
| cg05601456                       | ARSL;ARSL                       | 0.00559343        | 0.00559343           | 6.20128            | 6.20128                      | T up vs N                              | 10.231  | 31.1868   | 48.7702    | 1         |
| cg05602975                       | C6orf227                        | 0.00082871        | 0.000828707          | 3.39438            | 3.39438                      | T up vs N                              | 16.847  | 13.9891   | 13.2859    | 1         |
| cg05603527                       | VAX2                            | 0.00070264        | 0.000702635          | 0.215893           | -4.63192                     | T down vs N                            | 17.5    | 22.0105   | 20.124     | 1         |
| cg05603896                       | SCML4                           | 6.82E-05          | 6.82E-05             | 0.270534           | -3.69639                     | T down vs N                            | 28.368  | 16.0085   | 9.02919    | 1         |
| cg05605029                       | PIGL                            | 7.36E-05          | 7.36E-05             | 0.299893           | -3.33453                     | T down vs N                            | 27.962  | 13.5848   | 7.77341    | 1         |
| cg05605371                       | NHEDC1;NHEDC1                   | 0.00054344        | 0.000543441          | 0.192382           | -5.19799                     | T down vs N                            | 18.545  | 25.446    | 21.9545    | 1         |
| cg05611648                       | KLHL30                          | 9.54E-06          | 9.54E-06             | 0.240784           | -4.15309                     | T down vs N                            | 40.393  | 18.9886   | 7.52156    | 1         |
| cg05614735                       | WINK4                           | 1.68E-05          | 1.68E-05             | 8.64737            | 8.64737                      | T up vs N                              | 36.618  | 43.5878   | 19.0456    | 1         |
| cg05615150                       | ARPP-21                         | 0.00412887        | 0.00412887           | 0.299511           | -3.33878                     | T down vs N                            | 11.175  | 13.6136   | 19.4918    | 1         |
| cg05615856                       | HCG27                           | 0.00181557        | 0.00181557           | 0.284236           | -3.5182                      | T down vs N                            | 13.928  | 14.8214   | 17.0268    | 1         |
| cg05616959                       | ERC2                            | 4.85E-05          | 4.85E-05             | 0.305934           | -3.26868                     | T down vs N                            | 30.242  | 13.1386   | 6.95126    | 1         |
| cg05618222                       | BFSP2                           | 0.00042821        | 0.000428208          | 0.287638           | -3.47659                     | T down vs N                            | 19.545  | 14.5423   | 11.9048    | 1         |
| cg05618647                       | CASP4;CASP4                     | 5.64E-06          | 5.64E-06             | 0.14422            | -6.93385                     | T down vs N                            | 44.146  | 35.1203   | 12.7287    | 1         |
| cg05619785                       | TNKB                            | 0.00243606        | 0.00243606           | 0.320387           | -3.12122                     | T down vs N                            | 12.908  | 12.1344   | 15.041     | 1         |
| cg05620821                       | ALDH3B1;ALDH3B1;ALDH3B1         | 0.00165156        | 0.00165156           | 0.33267            | -3.00598                     | T down vs N                            | 14.264  | 11.3455   | 12.726     | 1         |

| Probeset ID | UCSC_REFGENE_NAME               | p-value<br>(Type) | p-value (T vs.<br>N) | Ratio (T<br>vs. N) | Fold-<br>Change (T<br>vs. N) | Fold-Change (T vs.<br>N) (Description) | F(Type) | SS (Type) | SS (Error) | F (Error) |
|-------------|---------------------------------|-------------------|----------------------|--------------------|------------------------------|----------------------------------------|---------|-----------|------------|-----------|
| cg05621962  | MYO1F                           | 2.77E-06          | 2.77E-06             | 0.247155           | -4.04604                     | T down vs N                            | 49.64   | 18.2984   | 5.8979     | 1         |
| cg05623614  | LOC642597                       | 0.00452824        | 0.00452824           | 0.264119           | -3.78617                     | T down vs N                            | 10.884  | 16.6016   | 24.4055    | 1         |
| cg05624376  | DHRS9;DHRS9;DHRS9;DHRS9         | 0.00035964        | 0.000359637          | 0.293925           | -3.40223                     | T down vs N                            | 20.297  | 14.042    | 11.0692    | 1         |
| cg05626117  | CLEC4G                          | 0.00308787        | 0.00308787           | 0.324062           | -3.08583                     | T down vs N                            | 12.114  | 11.8924   | 15.7071    | 1         |
| cg05626376  | STK19;STK19;STK19;DOM3Z         | 0.00039211        | 0.000392105          | 0.079262           | -12.6163                     | T down vs N                            | 19.922  | 60.1886   | 48.3385    | 1         |
| cg05626738  | ZNF611;ZNF611;ZNF611            | 0.001497          | 0.001497             | 6.31318            | 6.31318                      | T up vs N                              | 14.618  | 31.8011   | 34.8068    | 1         |
| cg05627441  | 9-Sep                           | 5.17E-05          | 5.17E-05             | 9.13777            | 9.13777                      | T up vs N                              | 29.889  | 45.8453   | 24.542     | 1         |
| cg05628160  | RGS20                           | 0.000755          | 0.000755003          | 0.276102           | -3.62185                     | T down vs N                            | 17.214  | 15.5135   | 14.4196    | 1         |
| cg05628549  | PRKCDBP                         | 0.00074995        | 0.000749953          | 3.00048            | 3.00048                      | T up vs N                              | 17.24   | 11.3078   | 10.4943    | 1         |
| cg05632088  | ZNF735                          | 0.00023681        | 0.000236807          | 0.195609           | -5.11224                     | T down vs N                            | 22.168  | 24.935    | 17.9973    | 1         |
| cg05632229  | LOC100133893                    | 5.26E-05          | 5.26E-05             | 0.315385           | -3.17072                     | T down vs N                            | 29.787  | 12.4722   | 6.6995     | 1         |
| cg05634637  | CDH6                            | 0.00105283        | 0.00105283           | 0.30718            | -3.25542                     | T down vs N                            | 15.924  | 13.0485   | 13.1107    | 1         |
| cg05634915  | XYLT1                           | 2.64E-05          | 2.64E-05             | 0.22742            | -4.39715                     | T down vs N                            | 33.79   | 20.5422   | 9.72698    | 1         |
| cg05638689  | LTBP3;LTBP3;LTBP3               | 0.0001366         | 0.000136599          | 4.68784            | 4.68784                      | T up vs N                              | 24.788  | 22.3565   | 14.4305    | 1         |
| cg05641903  | FCER2                           | 0.00012296        | 0.000122961          | 0.27135            | -3.68528                     | T down vs N                            | 25.31   | 15.9348   | 10.0733    | 1         |
| cg05643188  | C1orf53                         | 2.53E-05          | 2.53E-05             | 0.200345           | -4.9914                      | T down vs N                            | 34.056  | 24.2092   | 11.3739    | 1         |
| cg05643453  | CASQ1                           | 0.00376739        | 0.00376739           | 0.277256           | -3.60677                     | T down vs N                            | 11.467  | 15.4131   | 21.5057    | 1         |
| cg05643545  | CYTSB;CYTSB                     | 0.00070162        | 0.000701617          | 0.29051            | -3.44222                     | T down vs N                            | 17.506  | 14.3113   | 13.0804    | 1         |
| cg05644049  | SRM                             | 0.00044111        | 0.000441105          | 0.304529           | -3.28376                     | T down vs N                            | 19.419  | 13.2409   | 10.9099    | 1         |
| cg05648303  | SCOC;SCOC;SCOC;SCOC;SCOC        | 0.00097421        | 0.000974206          | 0.282902           | -3.53479                     | T down vs N                            | 16.22   | 14.9324   | 14.7297    | 1         |
| cg05649108  | BRUNOL4;BRUNOL4;BRUNOL4;BRUNOL4 | 0.00011607        | 0.000116073          | 10.8296            | 10.8296                      | T up vs N                              | 25.599  | 53.1555   | 33.223     | 1         |
| cg05650846  | CCDC64B                         | 1.96E-06          | 1.96E-06             | 6.28218            | 6.28218                      | T up vs N                              | 52.484  | 31.6314   | 9.64297    | 1         |
| cg05654059  | GABRD                           | 0.00049731        | 0.000497309          | 0.294281           | -3.39811                     | T down vs N                            | 18.913  | 14.0143   | 11.8556    | 1         |
| cg05654197  | ENPP7                           | 0.00016092        | 0.000160916          | 0.323472           | -3.09146                     | T down vs N                            | 23.989  | 11.9309   | 7.95777    | 1         |
| cg05654278  | NISCH                           | 1.77E-05          | 1.77E-05             | 5.28243            | 5.28243                      | T up vs N                              | 36.299  | 25.946    | 11.4366    | 1         |
| cg05654304  | VPS13D;VPS13D                   | 2.14E-05          | 2.14E-05             | 0.277085           | -3.609                       | T down vs N                            | 35.093  | 15.4279   | 7.03403    | 1         |
| cg05654329  | NHP2;NHP2                       | 0.00041092        | 0.000410918          | 0.23624            | -4.23298                     | T down vs N                            | 19.721  | 19.5002   | 15.8209    | 1         |
| cg05655915  | NARF;NARF;NARF;NARF             | 2.03E-05          | 2.03E-05             | 0.147059           | -6.79998                     | T down vs N                            | 35.433  | 34.4167   | 15.541     | 1         |
| cg05656497  | COL4A1                          | 0.00041245        | 0.000412447          | 0.255863           | -3.90835                     | T down vs N                            | 19.705  | 17.4031   | 14.1308    | 1         |
| cg05656688  | RUNX3;RUNX3                     | 0.00077252        | 0.000772524          | 3.3977             | 3.3977                       | T up vs N                              | 17.123  | 14.0115   | 13.0926    | 1         |
| cg05657792  | ALOX12                          | 0.00196632        | 0.00196632           | 3.45423            | 3.45423                      | T up vs N                              | 13.647  | 14.3921   | 16.8735    | 1         |
| cg05658173  | KCNK15                          | 7.30E-05          | 7.30E-05             | 0.237492           | -4.21067                     | T down vs N                            | 28.002  | 19.3575   | 11.0606    | 1         |
| cg05658707  | VGLL4                           | 0.00221222        | 0.00221222           | 0.281343           | -3.55438                     | T down vs N                            | 13.238  | 15.0634   | 18.2062    | 1         |
| cg05661164  | KRT83                           | 8.33E-05          | 8.33E-05             | 0.230931           | -4.33031                     | T down vs N                            | 27.305  | 20.1194   | 11.7893    | 1         |
| cg05662240  | WDR88                           | 2.62E-05          | 2.62E-05             | 0.288124           | -3.47073                     | T down vs N                            | 33.85   | 14.503    | 6.85523    | 1         |
| cg05663480  | NFASC;NFASC;NFASC;NFASC;NFASC   | 0.00123106        | 0.00123106           | 0.311333           | -3.212                       | T down vs N                            | 15.337  | 12.7533   | 13.305     | 1         |
| cg05663891  | ZNF257                          | 0.00057404        | 0.000574035          | 0.255555           | -3.91305                     | T down vs N                            | 18.319  | 17.4338   | 15.2269    | 1         |
| cg05666820  | FZD9                            | 4.91E-05          | 4.91E-05             | 4.61517            | 4.61517                      | T up vs N                              | 30.177  | 21.9066   | 11.6148    | 1         |
| cg05667197  | PIP                             | 3.32E-05          | 3.32E-05             | 0.139753           | -7.1555                      | T down vs N                            | 32.424  | 36.271    | 17.8984    | 1         |
| cg05668853  | RAB34;RAB34;RAB34;RAB34;RAB34;R | 0.00086204        | 0.000862042          | 3.23951            | 3.23951                      | T up vs N                              | 16.693  | 12.9404   | 12.4033    | 1         |
| cg05671350  | AB34;RAB34                      | 0.000146          | 0.000145998          | 4.39169            | 4.39169                      | T up vs N                              | 24.461  | 20.5077   | 13.414     | 1         |
| cg05671644  | P4HA3                           | 0.00155961        | 0.00155961           | 0.331079           | -3.02043                     | T down vs N                            | 14.47   | 11.4445   | 12.6545    | 1         |
| cg05674036  | FBXL13;FBXL13                   | 0.00669777        | 0.00669777           | 0.319502           | -3.12987                     | T down vs N                            | 9.6896  | 12.1934   | 20.1346    | 1         |
| cg05674437  | OR3A3                           | 4.79E-06          | 4.79E-06             | 7.11241            | 7.11241                      | T up vs N                              | 45.368  | 36.0487   | 12.7134    | 1         |
| cg05676251  | PIGZ                            | 0.00436393        | 0.00436393           | 0.270095           | -3.7024                      | T down vs N                            | 11      | 16.0483   | 23.3432    | 1         |
| cg05677630  | C16orf81                        | 0.00024985        | 0.000249849          | 0.330536           | -3.02538                     | T down vs N                            | 21.922  | 11.4785   | 8.37769    | 1         |
| cg05678758  | PPIL2;PPIL2;PPIL2               | 0.00350202        | 0.00350202           | 0.312245           | -3.20262                     | T down vs N                            | 11.703  | 12.6895   | 17.349     | 1         |
| cg05679108  | SHANK2                          | 0.00056384        | 0.000563837          | 0.289905           | -3.44941                     | T down vs N                            | 18.393  | 14.3597   | 12.4918    | 1         |
| cg05683451  | FOX2                            | 0.00592848        | 0.00592848           | 0.245349           | -4.07582                     | T down vs N                            | 10.055  | 18.4909   | 29.4236    | 1         |
| cg05685483  | CCDC153                         | 8.93E-06          | 8.93E-06             | 0.19122            | -5.22958                     | T down vs N                            | 40.855  | 25.6334   | 10.0389    | 1         |
| cg05687149  | ASB18                           | 4.78E-05          | 4.78E-05             | 0.311257           | -3.21278                     | T down vs N                            | 30.332  | 12.7587   | 6.73027    | 1         |
| cg05694761  | IL18                            | 0.00661384        | 0.00661384           | 0.261251           | -3.82774                     | T down vs N                            | 9.727   | 16.875    | 27.7577    | 1         |
| cg05694921  | BCAR4;BCAR4                     | 4.98E-05          | 4.98E-05             | 12.1232            | 12.1232                      | T up vs N                              | 30.1    | 58.3102   | 30.9954    | 1         |
| cg05697695  | PTPRU;PTPRU;PTPRU               | 7.97E-06          | 7.97E-06             | 5.11708            | 5.11708                      | T up vs N                              | 41.648  | 24.9639   | 9.59053    | 1         |
| cg05703009  | PTGER1                          | 7.20E-07          | 7.20E-07             | 0.21155            | -4.72702                     | T down vs N                            | 61.468  | 22.598    | 5.88219    | 1         |
| cg05704496  | OR52N2                          | 0.00668449        | 0.00668449           | 0.228592           | -4.3746                      | T down vs N                            | 9.6955  | 20.3998   | 33.6649    | 1         |
| cg05705496  | ZFH3;ZFH3                       | 2.21E-05          | 2.21E-05             | 0.280786           | -3.56143                     | T down vs N                            | 34.883  | 15.1105   | 6.93084    | 1         |
| cg05705549  | DNMT3L;DNMT3L                   | 0.00052307        | 0.000523073          | 0.276475           | -3.61697                     | T down vs N                            | 18.703  | 15.4809   | 13.2437    | 1         |
| cg05706719  | C16orf89;C16orf89               | 4.54E-06          | 4.54E-06             | 0.311935           | -3.2058                      | T down vs N                            | 45.774  | 12.7111   | 4.44308    | 1         |
| cg05708544  | B3GALT                          | 0.00122035        | 0.00122035           | 4.90476            | 4.90476                      | T up vs N                              | 15.369  | 23.6847   | 24.657     | 1         |
| cg05709468  | ZDHHC8P                         | 0.00068188        | 0.000681881          | 4.98943            | 4.98943                      | T up vs N                              | 17.62   | 24.1973   | 21.9726    | 1         |
| cg05709578  | OSBPL1A;OSBPL1A                 | 1.26E-05          | 1.26E-05             | 0.15397            | -6.49477                     | T down vs N                            | 38.511  | 32.7875   | 13.6221    | 1         |
| cg05711506  | LOC100192378                    | 0.00016606        | 0.000166058          | 4.9646             | 4.9646                       | T up vs N                              | 23.837  | 24.0474   | 16.1413    | 1         |
| cg05712979  | MAPK8IP3;MAPK8IP3               | 0.00042745        | 0.000427452          | 0.198472           | -5.03848                     | T down vs N                            | 19.552  | 24.4928   | 20.0428    | 1         |
| cg05714778  | FAM101A                         | 1.42E-06          | 1.42E-06             | 0.186125           | -5.37274                     | T down vs N                            | 55.221  | 26.4772   | 7.67165    | 1         |
| cg05715123  | TMPRSS12                        | 0.00105209        | 0.00105209           | 0.263949           | -3.78861                     | T down vs N                            | 15.927  | 16.6177   | 16.694     | 1         |
| cg05715649  | PION                            | 4.04E-05          | 4.04E-05             | 0.332058           | -3.01152                     | T down vs N                            | 31.287  | 11.3835   | 5.82156    | 1         |
| cg05715649  | SYT2                            | 4.04E-05          | 4.04E-05             | 0.332058           | -3.01152                     | T down vs N                            | 31.287  | 11.3835   | 5.82156    | 1         |
| cg05715828  | LRRC8A;CCBL1;CCBL1;CCBL1;LRRC8A | 0.00037909        | 0.000379087          | 0.250436           | -3.99304                     | T down vs N                            | 20.068  | 17.9548   | 14.315     | 1         |
| cg05718426  | CD19                            | 3.24E-06          | 3.24E-06             | 0.263649           | -3.79292                     | T down vs N                            | 48.376  | 16.6461   | 5.50561    | 1         |

| Probeset ID | UCSC_REFGENE_NAME                             | p-value<br>(Type) | p-value (T vs.<br>N) | Ratio (T<br>vs. N) | Fold-<br>Change (T<br>vs. N) | Fold-Change (T vs.<br>N) (Description) | F(Type) | SS (Type) | SS (Error) | F (Error) |
|-------------|-----------------------------------------------|-------------------|----------------------|--------------------|------------------------------|----------------------------------------|---------|-----------|------------|-----------|
| cg05720261  | HEYL;HEYL                                     | 1.68E-06          | 1.68E-06             | 29.9548            | 29.9548                      | T up vs N                              | 53.814  | 108.253   | 32.1857    | 1         |
| cg05720980  | KIR3DL2<br>MAPT;MAPT;MAPT;MAPT;MAPT;MAP       | 0.00023498        | 0.000234977          | 0.252383           | -3.96224                     | T down vs N                            | 22.203  | 17.7545   | 12.7941    | 1         |
| cg05721485  | T                                             | 0.00538412        | 0.00538412           | 3.40407            | 3.40407                      | T up vs N                              | 10.348  | 14.0544   | 21.7312    | 1         |
| cg05722371  | PEX19;PEX19                                   | 6.24E-06          | 6.24E-06             | 0.315382           | -3.17075                     | T down vs N                            | 43.398  | 12.4724   | 4.59837    | 1         |
| cg05722456  | LRRC8D;LRRC8D                                 | 0.00161327        | 0.00161327           | 0.221296           | -4.51884                     | T down vs N                            | 14.349  | 21.3064   | 23.7588    | 1         |
| cg05722504  | PHOX2B<br>TMEM176B;TMEM176B;TMEM176B;T        | 0.00104482        | 0.00104482           | 5.13582            | 5.13582                      | T up vs N                              | 15.953  | 25.0758   | 25.1495    | 1         |
| cg05726600  | MEM176B;TMEM176A                              | 0.00027051        | 0.000270508          | 3.54342            | 3.54342                      | T up vs N                              | 21.561  | 14.9901   | 11.1238    | 1         |
| cg05726701  | OR11L1                                        | 6.77E-05          | 6.77E-05             | 0.279673           | -3.5756                      | T down vs N                            | 28.406  | 15.2052   | 8.56445    | 1         |
| cg05726756  | HOXB1                                         | 3.99E-05          | 3.99E-05             | 8.66304            | 8.66304                      | T up vs N                              | 31.363  | 43.661    | 22.2738    | 1         |
| cg05733285  | WDFC6<br>TGIF1;TGIF1;TGIF1;TGIF1;TGIF1;TGIF1; | 0.00012041        | 0.000120405          | 0.161687           | -6.18478                     | T down vs N                            | 25.415  | 31.0958   | 19.5761    | 1         |
| cg05737526  | TGIF1;TGIF1                                   | 0.00011724        | 0.000117238          | 0.257444           | -3.88434                     | T down vs N                            | 25.549  | 17.2461   | 10.8003    | 1         |
| cg05738240  | RBM19;RBM19;RBM19                             | 0.00157264        | 0.00157264           | 0.277913           | -3.59825                     | T down vs N                            | 14.44   | 15.3563   | 17.015     | 1         |
| cg05740739  | OR6B3                                         | 7.20E-05          | 7.20E-05             | 0.249413           | -4.00941                     | T down vs N                            | 28.079  | 18.0611   | 10.2915    | 1         |
| cg05740959  | CACNA1F                                       | 0.00081215        | 0.000812147          | 3.87601            | 3.87601                      | T up vs N                              | 16.926  | 17.1916   | 16.251     | 1         |
| cg05741937  | TXNRD1                                        | 2.58E-05          | 2.58E-05             | 12.2079            | 12.2079                      | T up vs N                              | 33.932  | 58.6362   | 27.649     | 1         |
| cg05743713  | KDM2A;KDM2A                                   | 0.00212851        | 0.00212851           | 4.34684            | 4.34684                      | T up vs N                              | 13.708  | 19.0345   | 20.8286    | 1         |
| cg05744675  | CYBA                                          | 4.66E-05          | 4.66E-05             | 7.5439             | 7.5439                       | T up vs N                              | 30.466  | 38.2457   | 20.0859    | 1         |
| cg05747555  | MARCH10;MARCH10                               | 0.00021302        | 0.000213023          | 0.332364           | -3.00875                     | T down vs N                            | 22.658  | 11.3645   | 8.02518    | 1         |
| cg05749559  | KCNU1                                         | 0.0003474         | 0.000347399          | 0.326497           | -3.06282                     | T down vs N                            | 20.448  | 11.735    | 9.18218    | 1         |
| cg05754939  | LRP5                                          | 6.28E-07          | 6.28E-07             | 0.221584           | -4.51295                     | T down vs N                            | 62.779  | 21.2696   | 5.42081    | 1         |
| cg05755900  | PFDN6;WDR46;WDR46                             | 1.56E-05          | 1.56E-05             | 0.099635           | -10.0366                     | T down vs N                            | 37.117  | 49.8162   | 21.4743    | 1         |
| cg05756029  | LOC494141;LOC494141;LOC494141                 | 0.00115884        | 0.00115884           | 3.94728            | 3.94728                      | T up vs N                              | 15.562  | 17.6571   | 18.1537    | 1         |
| cg05756489  | HTR7;HTR7;HTR7                                | 5.57E-06          | 5.57E-06             | 15.4973            | 15.4973                      | T up vs N                              | 44.233  | 70.3516   | 25.4479    | 1         |
| cg05756780  | IL6R;IL6R                                     | 0.00050547        | 0.000505473          | 0.251158           | -3.98156                     | T down vs N                            | 18.845  | 17.8802   | 15.1806    | 1         |
| cg05758861  | BAI1                                          | 2.57E-06          | 2.57E-06             | 8.32966            | 8.32966                      | T up vs N                              | 50.25   | 42.0882   | 13.4013    | 1         |
| cg05758978  | DDX56                                         | 7.68E-05          | 7.68E-05             | 0.11483            | -8.70851                     | T down vs N                            | 27.733  | 43.8729   | 25.3117    | 1         |
| cg05762338  | KRTAP1-5                                      | 0.00316014        | 0.00316014           | 0.296298           | -3.37498                     | T down vs N                            | 12.038  | 13.8582   | 18.4192    | 1         |
| cg05762694  | PITX3                                         | 0.00158226        | 0.00158226           | 14.1046            | 14.1046                      | T up vs N                              | 14.418  | 65.6002   | 72.7968    | 1         |
| cg05764839  | PRRT1                                         | 0.0001444         | 0.000144402          | 5.58609            | 5.58609                      | T up vs N                              | 24.515  | 27.7179   | 18.0903    | 1         |
| cg05765254  | RPTN<br>FCRL1;FCRL1;FCRL1;FCRL1;FCRL1;FCRL1;  | 0.00016182        | 0.000161822          | 0.247729           | -4.03667                     | T down vs N                            | 23.961  | 18.2377   | 12.1781    | 1         |
| cg05766896  | 1                                             | 3.26E-05          | 3.26E-05             | 0.215296           | -4.64477                     | T down vs N                            | 32.539  | 22.0901   | 10.862     | 1         |
| cg05767035  | NELL2;NELL2;NELL2;NELL2;NELL2                 | 2.46E-06          | 2.46E-06             | 0.275524           | -3.62945                     | T down vs N                            | 50.594  | 15.5641   | 4.92205    | 1         |
| cg05767404  | C1orf150                                      | 0.00628302        | 0.00628302           | 0.215886           | -4.63206                     | T down vs N                            | 9.8803  | 22.0114   | 35.645     | 1         |
| cg05767720  | PRRT1                                         | 2.19E-05          | 2.19E-05             | 5.58155            | 5.58155                      | T up vs N                              | 34.947  | 27.6917   | 12.6782    | 1         |
| cg05768922  | HEPACAM                                       | 0.0001667         | 0.000166703          | 3.36327            | 3.36327                      | T up vs N                              | 23.818  | 13.7791   | 9.25616    | 1         |
| cg05774672  | FZD5                                          | 3.97E-05          | 3.97E-05             | 3.40979            | 3.40979                      | T up vs N                              | 31.384  | 14.093    | 7.18474    | 1         |
| cg05774699  | HOXA5                                         | 0.00391816        | 0.00391816           | 3.14651            | 3.14651                      | T up vs N                              | 11.342  | 12.3071   | 17.3622    | 1         |
| cg05774978  | PDIA3P                                        | 0.00032738        | 0.000327382          | 5.25285            | 5.25285                      | T up vs N                              | 20.709  | 25.7712   | 19.9111    | 1         |
| cg05776787  | SCN10A                                        | 0.00039656        | 0.000396558          | 0.167269           | -5.97838                     | T down vs N                            | 19.874  | 29.9481   | 24.1107    | 1         |
| cg05777583  | FCRL2                                         | 5.13E-05          | 5.13E-05             | 0.237207           | -4.21572                     | T down vs N                            | 29.93   | 19.3899   | 10.3655    | 1         |
| cg05778424  | AKAP1                                         | 0.00014075        | 0.000140749          | 0.255566           | -3.91289                     | T down vs N                            | 24.641  | 17.4328   | 11.3196    | 1         |
| cg05780139  | RPL23                                         | 3.85E-05          | 3.85E-05             | 0.228746           | -4.37166                     | T down vs N                            | 33.039  | 19.1823   | 8.70891    | 1         |
| cg05783290  | GIMAP2                                        | 2.25E-06          | 2.25E-06             | 0.261412           | -3.82538                     | T down vs N                            | 51.331  | 16.8595   | 5.25516    | 1         |
| cg05784088  | FCRL2                                         | 0.00032609        | 0.000326094          | 0.245928           | -4.06624                     | T down vs N                            | 20.726  | 18.429    | 14.2265    | 1         |
| cg05784157  | KLHL14                                        | 7.17E-05          | 7.17E-05             | 8.12598            | 8.12598                      | T up vs N                              | 28.097  | 41.1109   | 23.4107    | 1         |
| cg05784171  | LRCH2                                         | 2.14E-05          | 2.14E-05             | 0.231936           | -4.31154                     | T down vs N                            | 35.084  | 20.0003   | 9.12112    | 1         |
| cg05787038  | DEFA10P                                       | 6.75E-06          | 6.75E-06             | 0.224798           | -4.44843                     | T down vs N                            | 42.836  | 20.8651   | 7.79353    | 1         |
| cg05788138  | OR5L1                                         | 4.56E-05          | 4.56E-05             | 0.294773           | -3.39244                     | T down vs N                            | 30.594  | 13.976    | 7.30906    | 1         |
| cg05789359  | HGC6.3                                        | 4.78E-05          | 4.78E-05             | 0.189378           | -5.28046                     | T down vs N                            | 30.322  | 25.9343   | 13.6849    | 1         |
| cg05790960  | GPR153                                        | 1.79E-05          | 1.79E-05             | 0.332798           | -3.00483                     | T down vs N                            | 36.22   | 11.3376   | 5.0083     | 1         |
| cg05791870  | C16orf35;C16orf35                             | 0.00682791        | 0.00682791           | 4.46004            | 4.46004                      | T up vs N                              | 9.6325  | 20.938    | 34.7791    | 1         |
| cg05793094  | TRIM10;TRIM10                                 | 9.55E-06          | 9.55E-06             | 0.227799           | -4.38983                     | T down vs N                            | 40.387  | 20.496    | 8.11993    | 1         |
| cg05794117  | OBSCN;OBSCN                                   | 0.00095284        | 0.00095284           | 0.246073           | -4.06384                     | T down vs N                            | 16.305  | 18.4135   | 18.0687    | 1         |
| cg05794927  | OR2W3                                         | 0.00425636        | 0.00425636           | 0.311399           | -3.21132                     | T down vs N                            | 11.079  | 12.7487   | 18.4121    | 1         |
| cg05798318  | HRAS;HRAS;LRRC56;HRAS                         | 0.00014231        | 0.000142312          | 8.76903            | 8.76903                      | T up vs N                              | 24.587  | 44.1542   | 28.7339    | 1         |
| cg05799507  | MT1DP;MT1DP                                   | 1.61E-06          | 1.61E-06             | 26.4336            | 26.4336                      | T up vs N                              | 54.176  | 100.436   | 29.6619    | 1         |
| cg05800356  | MLKL;MLKL                                     | 0.00027397        | 0.000273967          | 0.251483           | -3.97641                     | T down vs N                            | 21.504  | 17.8467   | 13.2789    | 1         |
| cg05801246  | CPXM2                                         | 9.69E-05          | 9.69E-05             | 4.83866            | 4.83866                      | T up vs N                              | 26.519  | 23.2823   | 14.0474    | 1         |
| cg05801648  | SYK;SYK;SYK                                   | 0.00736506        | 0.00736506           | 3.95833            | 3.95833                      | T up vs N                              | 9.4092  | 17.7291   | 30.1476    | 1         |
| cg05805297  | VWA5B1                                        | 1.72E-05          | 1.72E-05             | 0.3172             | -3.15259                     | T down vs N                            | 36.472  | 12.3485   | 5.4172     | 1         |
| cg05809481  | ISG20L2                                       | 0.00057238        | 0.000572376          | 0.326036           | -3.06714                     | T down vs N                            | 18.331  | 11.7646   | 10.2687    | 1         |
| cg05814654  | IL21R;IL21R                                   | 0.0030308         | 0.0030308            | 0.33065            | -3.02435                     | T down vs N                            | 12.176  | 11.4714   | 15.0745    | 1         |
| cg05815404  | RPTOR;RPTOR                                   | 4.03E-06          | 4.03E-06             | 0.309413           | -3.23192                     | T down vs N                            | 46.682  | 12.8889   | 4.41757    | 1         |
| cg05816193  | HIST1H1A                                      | 0.00089873        | 0.000898727          | 3.94445            | 3.94445                      | T up vs N                              | 16.531  | 17.6387   | 17.0721    | 1         |
| cg05818824  | SCN4A                                         | 0.00079339        | 0.000793387          | 0.297622           | -3.35997                     | T down vs N                            | 17.018  | 13.7568   | 12.934     | 1         |
| cg05819223  | ROR1;ROR1                                     | 1.54E-05          | 1.54E-05             | 0.323736           | -3.08894                     | T down vs N                            | 37.196  | 11.9137   | 5.12481    | 1         |
| cg05819883  | SERGEF                                        | 0.00010952        | 0.000109518          | 0.31442            | -3.18046                     | T down vs N                            | 25.893  | 12.5386   | 7.7479     | 1         |

| Probeset ID                     | UCSC_REFGENE_NAME               | p-value<br>(Type) | p-value (T vs.<br>N) | Ratio (T<br>vs. N) | Fold-<br>Change (T<br>vs. N) | Fold-Change (T vs.<br>N) (Description) | F(Type) | SS (Type) | SS (Error) | F (Error) |
|---------------------------------|---------------------------------|-------------------|----------------------|--------------------|------------------------------|----------------------------------------|---------|-----------|------------|-----------|
| cg05823823                      | ITPR2                           | 3.29E-05          | 3.29E-05             | 0.211667           | -4.7244                      | T down vs N                            | 32.475  | 22.5819   | 11.1258    | 1         |
| cg05825244                      | EBF4                            | 0.00134166        | 0.00134166           | 3.63999            | 3.63999                      | T up vs N                              | 15.018  | 15.6342   | 16.656     | 1         |
| cg05826245                      | STYK1                           | 0.00013576        | 0.000135755          | 0.310834           | -3.21715                     | T down vs N                            | 24.819  | 12.7884   | 8.2444     | 1         |
| cg05830842                      | COL14A1                         | 0.00069572        | 0.000695717          | 0.201983           | -4.95091                     | T down vs N                            | 17.54   | 23.9645   | 21.8611    | 1         |
| cg05834805                      | PHF19                           | 1.42E-05          | 1.42E-05             | 5.51787            | 5.51787                      | T up vs N                              | 37.704  | 27.3233   | 11.5948    | 1         |
| cg05835276                      | NXP4                            | 0.00022018        | 0.000220176          | 4.80274            | 4.80274                      | T up vs N                              | 22.504  | 23.0627   | 16.3972    | 1         |
| cg05835982                      | TRH                             | 4.80E-05          | 4.80E-05             | 9.62672            | 9.62672                      | T up vs N                              | 30.299  | 48.0311   | 25.3637    | 1         |
| cg05836475                      | LOC554203                       | 7.98E-05          | 7.98E-05             | 0.16512            | -6.0562                      | T down vs N                            | 27.53   | 30.3829   | 17.6584    | 1         |
| cg05845376                      | SLC25A2                         | 0.00056899        | 0.00056899           | 5.97869            | 5.97869                      | T up vs N                              | 18.355  | 29.9499   | 26.107     | 1         |
| cg05845592                      | SULT1A1;SULT1A1                 | 0.0007171         | 0.0007171            | 13.4922            | 13.4922                      | T up vs N                              | 17.419  | 63.418    | 58.2535    | 1         |
| cg05845757                      | TFAP2E                          | 0.00036273        | 0.000362734          | 4.11371            | 4.11371                      | T up vs N                              | 20.26   | 18.7353   | 14.7961    | 1         |
| cg05848579                      | TPSD1                           | 0.00117393        | 0.00117393           | 0.160319           | -6.23755                     | T down vs N                            | 15.514  | 31.3865   | 32.37      | 1         |
| cg05849324                      | NHLRC1                          | 0.00017677        | 0.000176774          | 5.5386             | 5.5386                       | T up vs N                              | 23.537  | 27.4434   | 18.6553    | 1         |
| cg05850280                      | GRIN1;GRIN1;GRIN1               | 0.00232006        | 0.00232006           | 4.52451            | 4.52451                      | T up vs N                              | 13.398  | 20.0865   | 22.4879    | 1         |
| cg05852395                      | CD300LD;C17orf77                | 0.00067244        | 0.000672442          | 0.170573           | -5.86259                     | T down vs N                            | 17.676  | 29.2966   | 26.5187    | 1         |
| cg05852760                      | IGF2BP3                         | 5.20E-06          | 5.20E-06             | 0.212779           | -4.69972                     | T down vs N                            | 44.746  | 22.4297   | 8.02022    | 1         |
| cg05853788                      | MAPK8IP1                        | 0.00164707        | 0.00164707           | 3.1131             | 3.1131                       | T up vs N                              | 14.274  | 12.0789   | 13.5393    | 1         |
| cg05858126                      | MIR146B                         | 0.00087879        | 0.000878793          | 0.237818           | -4.20489                     | T down vs N                            | 16.618  | 19.3206   | 18.6021    | 1         |
| ALKBH2;ALKBH2;ALKBH2;ALKBH2;ALK |                                 |                   |                      |                    |                              |                                        |         |           |            |           |
| cg05858136                      | BH2                             | 0.00017084        | 0.000170835          | 0.220068           | -4.54404                     | T down vs N                            | 23.701  | 21.4639   | 14.4899    | 1         |
| cg05860723                      | MYF6                            | 0.00108291        | 0.00108291           | 8.47337            | 8.47337                      | T up vs N                              | 15.817  | 42.7702   | 43.2639    | 1         |
| cg05860920                      | ARHGAP6;ARHGAP6                 | 0.00031847        | 0.00031847           | 0.268415           | -3.72557                     | T down vs N                            | 20.831  | 16.2016   | 12.4442    | 1         |
| cg05860978                      | IL17B                           | 0.0001106         | 0.000110602          | 0.33244            | -3.00806                     | T down vs N                            | 25.843  | 11.3598   | 7.03304    | 1         |
| cg05862039                      | RAPGEF4;RAPGEF4                 | 0.00047854        | 0.000478538          | 0.225497           | -4.43465                     | T down vs N                            | 19.075  | 20.7785   | 17.4292    | 1         |
| cg05864326                      | HOXD3                           | 2.43E-06          | 2.43E-06             | 24.1449            | 24.1449                      | T up vs N                              | 50.679  | 94.9571   | 29.9791    | 1         |
| cg05864433                      | AMZ1                            | 2.41E-05          | 2.41E-05             | 0.155561           | -6.42834                     | T down vs N                            | 34.356  | 32.4281   | 15.1022    | 1         |
| cg05867134                      | STX1B                           | 5.73E-05          | 5.73E-05             | 3.02167            | 3.02167                      | T up vs N                              | 29.322  | 11.4531   | 6.24958    | 1         |
| cg05867448                      | FLJ30058                        | 0.00098438        | 0.000984377          | 5.83965            | 5.83965                      | T up vs N                              | 16.18   | 29.1668   | 28.8416    | 1         |
| cg05868413                      | PLAC1L                          | 4.30E-06          | 4.30E-06             | 0.140956           | -7.09443                     | T down vs N                            | 46.188  | 35.9557   | 12.4556    | 1         |
| cg05869585                      | TMEM186;PMM2                    | 0.00018297        | 0.000182974          | 0.271322           | -3.68565                     | T down vs N                            | 23.373  | 15.9373   | 10.9098    | 1         |
| cg05869611                      | GNAT3                           | 0.00016725        | 0.000167251          | 0.284735           | -3.51203                     | T down vs N                            | 23.803  | 14.78     | 9.93513    | 1         |
| PCDHGA4;PCDHGA9;PCDHGA1;PCDHG   |                                 |                   |                      |                    |                              |                                        |         |           |            |           |
| B1;PCDHGB6;PCDHGA11;PCDHGA11;P  |                                 |                   |                      |                    |                              |                                        |         |           |            |           |
| cg05870739                      | CDHGA11;PCDHGB3;PCDHGA11;PCD    | 0.00013832        | 0.000138318          | 8.43985            | 8.43985                      | T up vs N                              | 24.726  | 42.6117   | 27.5732    | 1         |
| cg05875819                      | PSORS1C1                        | 0.00176552        | 0.00176552           | 0.32009            | -3.12412                     | T down vs N                            | 14.027  | 12.1542   | 13.8642    | 1         |
| cg05877497                      | MEIS1                           | 0.00036078        | 0.000360782          | 0.144393           | -6.92554                     | T down vs N                            | 20.283  | 35.0768   | 27.6697    | 1         |
| cg05877590                      | OR13A1;OR13A1                   | 6.51E-05          | 6.51E-05             | 0.185232           | -5.39863                     | T down vs N                            | 28.616  | 26.6288   | 14.8889    | 1         |
| cg05877788                      | TP53I13                         | 0.0001063         | 0.000106295          | 5.05403            | 5.05403                      | T up vs N                              | 26.045  | 24.5862   | 15.1039    | 1         |
| cg05878535                      | GTF2F2                          | 0.00014399        | 0.00014399           | 0.244295           | -4.09341                     | T down vs N                            | 24.529  | 18.6045   | 12.1355    | 1         |
| cg05878887                      | C3orf26;FILIP1L;MIR548G;FILIP1L | 0.00183934        | 0.00183934           | 0.314057           | -3.18413                     | T down vs N                            | 13.882  | 12.5636   | 14.4808    | 1         |
| cg05880490                      | TAAR6                           | 0.00151032        | 0.00151032           | 0.316031           | -3.16424                     | T down vs N                            | 14.586  | 12.428    | 13.6326    | 1         |
| cg05881068                      | EBF3                            | 0.0019803         | 0.0019803            | 0.314164           | -3.18305                     | T down vs N                            | 13.622  | 12.5562   | 14.7478    | 1         |
| cg05882699                      | CTBP2;CTBP2                     | 0.00057541        | 0.000575409          | 3.52776            | 3.52776                      | T up vs N                              | 18.309  | 14.8854   | 13.0081    | 1         |
| cg05882745                      | CNGA4                           | 5.18E-05          | 5.18E-05             | 0.208001           | -4.80766                     | T down vs N                            | 29.879  | 23.0929   | 12.3659    | 1         |
| cg05886367                      | BTNL9;BTNL9                     | 5.54E-05          | 5.54E-05             | 0.205892           | -4.85692                     | T down vs N                            | 29.505  | 23.3937   | 12.6857    | 1         |
| cg05886546                      | WNNK4                           | 0.00091671        | 0.00091671           | 3.54515            | 3.54515                      | T up vs N                              | 16.454  | 15.0017   | 14.5875    | 1         |
| cg05888037                      | C13orf26                        | 0.0003907         | 0.000390697          | 0.328016           | -3.04863                     | T down vs N                            | 19.938  | 11.6378   | 9.33928    | 1         |
| cg05888433                      | OR11H4                          | 2.00E-05          | 2.00E-05             | 0.213475           | -4.6844                      | T down vs N                            | 35.508  | 22.3352   | 10.0644    | 1         |
| cg05888872                      | FRMD4A                          | 3.09E-05          | 3.09E-05             | 0.16093            | -6.2139                      | T down vs N                            | 32.845  | 31.2563   | 15.226     | 1         |
| cg05890243                      | ZBTB11;LOC100009676             | 0.00194155        | 0.00194155           | 0.323999           | -3.08643                     | T down vs N                            | 13.692  | 11.8966   | 13.9024    | 1         |
| cg05890484                      | BHMT                            | 0.00019362        | 0.000193616          | 6.26925            | 6.26925                      | T up vs N                              | 23.106  | 31.5606   | 21.8549    | 1         |
| cg05890616                      | C17orf105                       | 1.47E-05          | 1.47E-05             | 0.170921           | -5.85066                     | T down vs N                            | 37.501  | 29.2291   | 12.4706    | 1         |
| cg05892146                      | OR1E2                           | 0.00123569        | 0.00123569           | 0.251073           | -3.9829                      | T down vs N                            | 15.323  | 17.8889   | 18.6798    | 1         |
| cg05892673                      | C17orf46;LOC100133991           | 7.55E-07          | 7.55E-07             | 0.192674           | -5.19011                     | T down vs N                            | 61.019  | 25.3992   | 6.65997    | 1         |
| cg05894970                      | CDGAP                           | 1.46E-05          | 1.46E-05             | 0.165873           | -6.0287                      | T down vs N                            | 37.552  | 30.2295   | 12.8799    | 1         |
| cg05896714                      | MIR1180;B9D1                    | 6.35E-05          | 6.35E-05             | 0.268176           | -3.72889                     | T down vs N                            | 28.754  | 16.2236   | 9.02742    | 1         |
| cg05899103                      | LOC390595                       | 4.36E-05          | 4.36E-05             | 3.86548            | 3.86548                      | T up vs N                              | 30.845  | 17.1226   | 8.88179    | 1         |
| cg05901522                      | C10orf58                        | 1.02E-06          | 1.02E-06             | 0.286698           | -3.48799                     | T down vs N                            | 58.225  | 14.6188   | 4.01717    | 1         |
| cg05901765                      | MARVELD2;MARVELD2               | 0.00010281        | 0.000102811          | 9.44318            | 9.44318                      | T up vs N                              | 26.215  | 47.218    | 28.819     | 1         |
| cg05901786                      | PSG4;PSG4                       | 5.79E-06          | 5.79E-06             | 0.253113           | -3.9508                      | T down vs N                            | 43.951  | 17.6801   | 6.43631    | 1         |
| cg05903710                      | IL4R                            | 6.55E-05          | 6.55E-05             | 0.271414           | -3.6844                      | T down vs N                            | 28.591  | 15.929    | 8.91424    | 1         |
| cg05904366                      | ANO9                            | 0.00066434        | 0.000664336          | 3.14407            | 3.14407                      | T up vs N                              | 17.725  | 12.2904   | 11.0944    | 1         |
| cg05906166                      | KLF2                            | 0.00010423        | 0.000104226          | 5.27518            | 5.27518                      | T up vs N                              | 26.145  | 25.9032   | 15.852     | 1         |
|                                 |                                 |                   |                      |                    |                              |                                        |         |           |            |           |
| cg05908371                      | LOC284798;LOC284798;LOC284798   | 0.00088009        | 0.00088009           | 4.36425            | 4.36425                      | T up vs N                              | 16.612  | 20.3344   | 19.5849    | 1         |
| cg05908380                      | SLC35D3                         | 0.00066824        | 0.000668236          | 10.1066            | 10.1066                      | T up vs N                              | 17.701  | 50.117    | 45.3002    | 1         |
| cg05910415                      | IGFL1                           | 0.00035034        | 0.000350343          | 0.162939           | -6.13727                     | T down vs N                            | 20.411  | 30.8332   | 24.1695    | 1         |
| cg05910443                      | CUX1;CUX1;CUX1                  | 0.0061885         | 0.0061885            | 0.246714           | -4.05328                     | T down vs N                            | 9.9258  | 18.3453   | 29.572     | 1         |
| cg05911136                      | PLEKHG4B                        | 9.11E-06          | 9.11E-06             | 0.124164           | -8.05389                     | T down vs N                            | 40.711  | 40.7619   | 16.0199    | 1         |
| cg05911774                      | SRPX2;SRPX2                     | 1.91E-07          | 1.91E-07             | 0.148434           | -6.73701                     | T down vs N                            | 75.231  | 34.0835   | 7.24883    | 1         |
| cg05912466                      | PSMC1                           | 0.00082176        | 0.000821762          | 0.224395           | -4.45642                     | T down vs N                            | 16.88   | 20.9153   | 19.8251    | 1         |

| Probeset ID                   | UCSC_REFGENE_NAME           | p-value<br>(Type) | p-value (T vs.<br>N) | Ratio (T<br>vs. N) | Fold-<br>Change (T<br>vs. N) | Fold-Change (T vs.<br>N) (Description) | F(Type) | SS (Type) | SS (Error) | F (Error) |
|-------------------------------|-----------------------------|-------------------|----------------------|--------------------|------------------------------|----------------------------------------|---------|-----------|------------|-----------|
| cg05912589                    | TTC5                        | 4.40E-06          | 4.40E-06             | 0.176783           | -5.65666                     | T down vs N                            | 46.009  | 28.1239   | 9.78023    | 1         |
| cg05915866                    | ZFHx3                       | 0.00025542        | 0.000255417          | 0.198341           | -5.04181                     | T down vs N                            | 21.822  | 24.5128   | 17.9732    | 1         |
| cg05917537                    | CFTR                        | 0.00101179        | 0.00101179           | 0.282894           | -3.53489                     | T down vs N                            | 16.075  | 14.9331   | 14.863     | 1         |
| cg05919324                    | RPH3AL                      | 6.28E-06          | 6.28E-06             | 9.359              | 9.359                        | T up vs N                              | 43.358  | 46.8421   | 17.2857    | 1         |
| cg05919685                    | APCS                        | 1.11E-05          | 1.11E-05             | 0.132635           | -7.53947                     | T down vs N                            | 39.383  | 38.2234   | 15.5287    | 1         |
| cg05920345                    | AARS2                       | 0.00411282        | 0.00411282           | 0.331385           | -3.01764                     | T down vs N                            | 11.187  | 11.4254   | 16.3408    | 1         |
| cg05921170                    | S100A12                     | 3.19E-05          | 3.19E-05             | 0.099983           | -10.0018                     | T down vs N                            | 32.664  | 49.666    | 24.3283    | 1         |
| cg05921260                    | GPX6                        | 0.00019964        | 0.000199637          | 0.232702           | -4.29734                     | T down vs N                            | 22.961  | 19.9101   | 13.8738    | 1         |
| cg05921699                    | CD79A;CD79A                 | 0.00013268        | 0.000132681          | 0.176313           | -5.67173                     | T down vs N                            | 24.932  | 28.2103   | 18.104     | 1         |
| cg05922384                    | CFH                         | 0.00471183        | 0.00471183           | 0.27175            | -3.67985                     | T down vs N                            | 10.76   | 15.8989   | 23.6422    | 1         |
| cg05922610                    | NR2E1                       | 8.90E-06          | 8.90E-06             | 0.13644            | -7.32925                     | T down vs N                            | 40.876  | 37.1608   | 14.5458    | 1         |
| cg05924254                    | RNF212;RNF212               | 0.00074402        | 0.000744021          | 3.02514            | 3.02514                      | T up vs N                              | 17.272  | 11.4769   | 10.6317    | 1         |
| cg05924979                    | SYNPO2;SYNPO2;SYNPO2        | 4.12E-05          | 4.12E-05             | 0.203413           | -4.9161                      | T down vs N                            | 31.165  | 23.7536   | 12.1949    | 1         |
| cg05925291                    | PRPF31;TFPT                 | 0.00023385        | 0.00023385           | 0.299958           | -3.3338                      | T down vs N                            | 22.226  | 13.5799   | 9.77604    | 1         |
| cg05927401                    | NLRP12;NLRP12;NLRP12        | 0.00127974        | 0.00127974           | 0.259393           | -3.85516                     | T down vs N                            | 15.193  | 17.055    | 17.9612    | 1         |
| cg05928806                    | PRRT4                       | 6.01E-05          | 6.01E-05             | 4.50714            | 4.50714                      | T up vs N                              | 29.06   | 21.2333   | 11.6909    | 1         |
| cg05929019                    | LAMC2;LAMC2                 | 0.00195074        | 0.00195074           | 5.66638            | 5.66638                      | T up vs N                              | 13.675  | 28.1796   | 32.9709    | 1         |
| cg05932702                    | RAB21                       | 0.00430434        | 0.00430434           | 0.229585           | -4.35568                     | T down vs N                            | 11.043  | 20.2801   | 29.383     | 1         |
| cg05939324                    | CD163;CD163                 | 0.00265996        | 0.00265996           | 0.222687           | -4.49061                     | T down vs N                            | 12.611  | 21.1298   | 26.8086    | 1         |
| cg05939993                    | PROP1                       | 0.00017499        | 0.000174992          | 0.239441           | -4.1764                      | T down vs N                            | 23.586  | 19.1381   | 12.9829    | 1         |
| cg05940240                    | TEF                         | 2.14E-05          | 2.14E-05             | 0.328216           | -3.04677                     | T down vs N                            | 35.099  | 11.6251   | 5.29931    | 1         |
| cg05940452                    | FOXR1;FOXR1                 | 0.0027737         | 0.0027737            | 4.64685            | 4.64685                      | T up vs N                              | 18.12   | 12.2794   | 5.42148    | 1         |
| cg05941624                    | SYNJ2                       | 0.00292764        | 0.00292764           | 6.46161            | 6.46161                      | T up vs N                              | 12.29   | 32.6083   | 42.4503    | 1         |
| cg05941641                    | DCUN1D2                     | 0.0001216         | 0.000121601          | 0.200145           | -4.99637                     | T down vs N                            | 25.366  | 24.2392   | 15.2893    | 1         |
| cg05943574                    | OR2G6                       | 4.73E-07          | 4.73E-07             | 0.087635           | -11.411                      | T down vs N                            | 65.579  | 55.515    | 13.5446    | 1         |
| cg05943655                    | RSPH9                       | 0.00102999        | 0.00102999           | 4.95847            | 4.95847                      | T up vs N                              | 16.008  | 24.0103   | 23.999     | 1         |
| cg05945615                    | SH3BP1                      | 0.00122091        | 0.00122091           | 4.00018            | 4.00018                      | T up vs N                              | 15.367  | 18.0012   | 18.7422    | 1         |
| cg05946604                    | OR1A1                       | 0.00016588        | 0.000165878          | 0.230016           | -4.34752                     | T down vs N                            | 23.842  | 20.2285   | 13.5749    | 1         |
| cg05948372                    | ABHD3                       | 6.14E-05          | 6.14E-05             | 0.318259           | -3.1421                      | T down vs N                            | 28.935  | 12.2769   | 6.78869    | 1         |
| cg05949173                    | IL1F10                      | 4.44E-06          | 4.44E-06             | 0.149442           | -6.69154                     | T down vs N                            | 45.943  | 33.8419   | 11.7858    | 1         |
| cg05950572                    | SPON1                       | 0.00055721        | 0.00055721           | 0.287948           | -3.47285                     | T down vs N                            | 18.441  | 14.5172   | 12.5954    | 1         |
| cg05950711                    | COL21A1                     | 6.97E-05          | 6.97E-05             | 9.30996            | 9.30996                      | T up vs N                              | 28.25   | 46.6223   | 26.4056    | 1         |
| cg05951202                    | EPX                         | 8.34E-05          | 8.34E-05             | 0.296909           | -3.36803                     | T down vs N                            | 27.299  | 13.8113   | 8.09482    | 1         |
| cg05951573                    | AGAP3;AGAP3                 | 9.84E-05          | 9.84E-05             | 6.49834            | 6.49834                      | T up vs N                              | 26.439  | 32.8067   | 19.8535    | 1         |
| cg05953373                    | CBFA2T3                     | 0.00457599        | 0.00457599           | 0.306406           | -3.26364                     | T down vs N                            | 10.851  | 13.1044   | 19.3227    | 1         |
| cg05954120                    | TMEM79;TMEM79               | 1.30E-05          | 1.30E-05             | 0.251083           | -3.98274                     | T down vs N                            | 38.288  | 17.8879   | 7.4751     | 1         |
| cg05956679                    | HBA2                        | 0.0030644         | 0.0030644            | 0.257684           | -3.88073                     | T down vs N                            | 12.139  | 17.2225   | 22.6997    | 1         |
| cg05958050                    | MT1G;MT1H                   | 6.09E-06          | 6.09E-06             | 6.47889            | 6.47889                      | T up vs N                              | 43.585  | 32.7017   | 12.0049    | 1         |
| cg05958352                    | RNASE1;RNASE1;RNASE1;RNASE1 | 0.00188386        | 0.00188386           | 4.20201            | 4.20201                      | T up vs N                              | 13.797  | 19.3021   | 22.3835    | 1         |
| cg05960677                    | RBM43                       | 6.64E-06          | 6.64E-06             | 0.147098           | -6.7982                      | T down vs N                            | 42.958  | 34.4073   | 12.8153    | 1         |
| MRPL55;MRPL55;MRPL55;MRPL55;M |                             |                   |                      |                    |                              |                                        |         |           |            |           |
| cg05961374                    | RPL55;MRPL55;MRPL55;MRPL55  | 4.39E-06          | 4.39E-06             | 0.217607           | -4.59545                     | T down vs N                            | 46.016  | 21.7841   | 7.5745     | 1         |
| cg05963962                    | LOC84856                    | 1.28E-06          | 1.28E-06             | 0.3148             | -3.17662                     | T down vs N                            | 56.167  | 12.5124   | 3.56433    | 1         |
| cg05965277                    | LHX5                        | 1.23E-05          | 1.23E-05             | 0.104733           | -9.54811                     | T down vs N                            | 38.645  | 47.6839   | 19.7423    | 1         |
| cg05969306                    | NUDT15                      | 0.00024385        | 0.000243853          | 0.322725           | -3.09861                     | T down vs N                            | 22.033  | 11.9799   | 8.69952    | 1         |
| cg05970317                    | AUTS2;AUTS2                 | 0.00090256        | 0.000902562          | 0.265417           | -3.76765                     | T down vs N                            | 16.515  | 16.4795   | 15.9661    | 1         |
| cg05974274                    | PRDM8;PRDM8                 | 4.66E-06          | 4.66E-06             | 25.1806            | 25.1806                      | T up vs N                              | 45.564  | 97.4789   | 34.2298    | 1         |
| cg05979433                    | CUX2                        | 0.00076233        | 0.000762329          | 0.141679           | -7.05821                     | T down vs N                            | 17.176  | 35.7681   | 33.3201    | 1         |
| cg05981038                    | CARD6                       | 9.04E-05          | 9.04E-05             | 0.210878           | -4.74207                     | T down vs N                            | 26.877  | 22.6906   | 13.5079    | 1         |
| cg05981335                    | MYF6                        | 0.00201098        | 0.00201098           | 3.91636            | 3.91636                      | T up vs N                              | 13.569  | 17.4554   | 20.5833    | 1         |
| cg05986446                    | GLDC                        | 0.00183772        | 0.00183772           | 0.310811           | -3.21739                     | T down vs N                            | 13.885  | 12.79     | 14.7385    | 1         |
| cg05986933                    | HAAO                        | 0.00033632        | 0.000336318          | 3.70487            | 3.70487                      | T up vs N                              | 20.591  | 16.0646   | 12.4832    | 1         |
| cg05989312                    | GCOM1;GCOM1;GCOM1;GCOM1     | 0.0006861         | 0.000686103          | 0.276399           | -3.61796                     | T down vs N                            | 17.595  | 15.4876   | 14.0834    | 1         |
| cg05995496                    | TRIM10;TRIM10               | 0.00018758        | 0.000187578          | 0.302889           | -3.30154                     | T down vs N                            | 23.255  | 13.3614   | 9.19288    | 1         |
| cg05997414                    | HDAC4                       | 9.59E-06          | 9.59E-06             | 0.119305           | -8.38185                     | T down vs N                            | 40.359  | 42.3366   | 16.7842    | 1         |
| cg05999628                    | CCL11                       | 0.00093763        | 0.000937627          | 0.271211           | -3.68717                     | T down vs N                            | 16.367  | 15.9474   | 15.5895    | 1         |
| cg05999993                    | AOAH                        | 5.34E-06          | 5.34E-06             | 0.274247           | -3.64635                     | T down vs N                            | 44.552  | 15.6764   | 5.62986    | 1         |
| cg06001786                    | CCNJL                       | 0.00014393        | 0.000143928          | 0.292444           | -3.41946                     | T down vs N                            | 24.531  | 14.1581   | 9.23435    | 1         |
| cg06008384                    | RHAG                        | 1.80E-05          | 1.80E-05             | 0.320464           | -3.12047                     | T down vs N                            | 36.173  | 12.1293   | 5.36504    | 1         |
| cg06008480                    | TTC12                       | 1.86E-05          | 1.86E-05             | 46.2327            | 46.2327                      | T up vs N                              | 35.961  | 137.656   | 61.2467    | 1         |
| cg06008617                    | MRPS36                      | 9.11E-05          | 9.11E-05             | 0.26896            | -3.71802                     | T down vs N                            | 26.838  | 16.1517   | 9.62923    | 1         |
| cg06012932                    | C6orf10                     | 4.97E-06          | 4.97E-06             | 0.264404           | -3.78209                     | T down vs N                            | 45.08   | 16.5747   | 5.88273    | 1         |
| cg06015142                    | CCDC146                     | 0.00016789        | 0.000167894          | 0.230507           | -4.33827                     | T down vs N                            | 23.784  | 20.1699   | 13.5687    | 1         |
| cg06015525                    | ARHGAP9;ARHGAP9;ARHGAP9     | 1.57E-05          | 1.57E-05             | 0.30693            | -3.25807                     | T down vs N                            | 37.043  | 13.0665   | 5.6438     | 1         |
| cg06018270                    | SIPA1L3                     | 0.00115798        | 0.00115798           | 0.311867           | -3.20649                     | T down vs N                            | 15.565  | 12.7159   | 13.0712    | 1         |
| cg06025036                    | HCCA2                       | 0.00226137        | 0.00226137           | 0.289379           | -3.45568                     | T down vs N                            | 13.162  | 14.4018   | 17.5066    | 1         |
| cg06026425                    | CLINT1                      | 3.22E-05          | 3.22E-05             | 0.186222           | -5.36994                     | T down vs N                            | 32.613  | 26.4607   | 12.9817    | 1         |
| cg06028247                    | ADARB2                      | 4.48E-05          | 4.48E-05             | 0.236356           | -4.23091                     | T down vs N                            | 30.69   | 19.4869   | 10.1595    | 1         |
| cg06031268                    | WRNIP1;WRNIP1               | 0.00028161        | 0.000281606          | 0.268241           | -3.72799                     | T down vs N                            | 21.38   | 16.2176   | 12.1367    | 1         |
| cg06033321                    | DDAH1                       | 0.00027879        | 0.000278793          | 0.185323           | -5.39597                     | T down vs N                            | 21.425  | 26.6133   | 19.8745    | 1         |
| cg06034133                    | SPRR2G                      | 1.49E-05          | 1.49E-05             | 0.297485           | -3.36151                     | T down vs N                            | 37.398  | 13.7673   | 5.89009    | 1         |

| Probeset ID                         | UCSC_REFGENE_NAME             | p-value<br>(Type) | p-value (T vs.<br>N) | Ratio (T<br>vs. N) | Fold-<br>Change (T<br>vs. N) | Fold-Change (T vs.<br>N) (Description) | F(Type) | SS (Type) | SS (Error) | F (Error) |
|-------------------------------------|-------------------------------|-------------------|----------------------|--------------------|------------------------------|----------------------------------------|---------|-----------|------------|-----------|
| cg06034548                          | C5orf27                       | 0.00099705        | 0.00099705           | 0.329777           | -3.03236                     | T down vs N                            | 16.132  | 11.5263   | 11.4324    | 1         |
| cg06035600                          | MAP3K6                        | 1.67E-05          | 1.67E-05             | 4.49925            | 4.49925                      | T up vs N                              | 36.652  | 21.1839   | 9.24764    | 1         |
| cg06035708                          | A2BP1;A2BP1                   | 0.00104961        | 0.00104961           | 0.202289           | -4.94341                     | T down vs N                            | 15.936  | 23.9191   | 24.0155    | 1         |
| cg06038701                          | CYSLTR2                       | 0.00022154        | 0.000221539          | 0.276984           | -3.61032                     | T down vs N                            | 22.476  | 15.4367   | 10.9892    | 1         |
| cg06040034                          | DLGAP2                        | 0.00040043        | 0.00040043           | 0.219451           | -4.55682                     | T down vs N                            | 19.832  | 21.5436   | 17.3809    | 1         |
| cg06040811                          | MEF2C;MEF2C                   | 9.14E-06          | 9.14E-06             | 4.20315            | 4.20315                      | T up vs N                              | 40.69   | 19.3094   | 7.59282    | 1         |
| cg06041695                          | SRGN                          | 0.00197963        | 0.00197963           | 0.302737           | -3.3032                      | T down vs N                            | 13.624  | 13.3727   | 15.7054    | 1         |
| cg06042124                          | LOC285627                     | 9.80E-05          | 9.80E-05             | 0.311819           | -3.20699                     | T down vs N                            | 26.462  | 12.7192   | 7.69059    | 1         |
| cg06042259                          | JAZF1                         | 1.85E-06          | 1.85E-06             | 0.217613           | -4.59531                     | T down vs N                            | 52.987  | 21.7832   | 6.57773    | 1         |
| cg06047020                          | GPC6                          | 5.47E-05          | 5.47E-05             | 0.248465           | -4.02471                     | T down vs N                            | 29.577  | 18.1603   | 9.82404    | 1         |
| cg06048910                          | SLC22A18;SLC22A18;SLC22A18AS  | 0.00030286        | 0.000302857          | 0.209527           | -4.77265                     | T down vs N                            | 21.054  | 22.8784   | 17.3862    | 1         |
| cg06050065                          | AARSD1;AARSD1                 | 1.72E-08          | 1.72E-08             | 0.304              | -3.28948                     | T down vs N                            | 106.92  | 13.2797   | 1.98718    | 1         |
| cg06051311                          | TRIM15;TRIM15                 | 0.00029551        | 0.000295511          | 0.244335           | -4.09275                     | T down vs N                            | 21.164  | 18.6002   | 14.0619    | 1         |
| cg06053098                          | C4orf45                       | 8.57E-06          | 8.57E-06             | 0.272245           | -3.67316                     | T down vs N                            | 41.136  | 15.8545   | 6.16662    | 1         |
| cg06058073                          | MOXD2                         | 0.00016374        | 0.000163741          | 0.169932           | -5.88472                     | T down vs N                            | 23.905  | 29.4215   | 19.6926    | 1         |
| cg06058187                          | GZMA                          | 9.17E-05          | 9.17E-05             | 0.202221           | -4.94509                     | T down vs N                            | 26.806  | 23.9293   | 14.2832    | 1         |
| cg06060497                          | ZMYM1                         | 4.24E-05          | 4.24E-05             | 0.249389           | -4.0098                      | T down vs N                            | 31.002  | 18.0636   | 9.32268    | 1         |
| cg06060835                          | CFB;CFB                       | 0.00052596        | 0.000525956          | 0.270053           | -3.70298                     | T down vs N                            | 18.68   | 16.0521   | 13.7492    | 1         |
| cg06060874                          | PRDM16;PRDM16                 | 1.11E-05          | 1.11E-05             | 0.310911           | -3.21635                     | T down vs N                            | 39.363  | 12.783    | 5.19594    | 1         |
| cg06066303                          | MS4A5;MS4A5                   | 1.64E-05          | 1.64E-05             | 0.201392           | -4.96543                     | T down vs N                            | 36.773  | 24.0524   | 10.4653    | 1         |
| cg06070755                          | SLC22A10                      | 0.0024816         | 0.0024816            | 0.221833           | -4.50789                     | T down vs N                            | 12.845  | 21.2379   | 26.454     | 1         |
| cg06074801                          | DSCAM                         | 0.00017954        | 0.00017954           | 0.296202           | -3.37608                     | T down vs N                            | 23.463  | 13.8656   | 9.4552     | 1         |
| cg06074896                          | MICALL2                       | 4.71E-07          | 4.71E-07             | 0.261267           | -3.8275                      | T down vs N                            | 65.636  | 16.8734   | 4.11323    | 1         |
| cg06078892                          | EBF2                          | 1.26E-07          | 1.26E-07             | 0.081335           | -12.2949                     | T down vs N                            | 80.108  | 58.9693   | 11.778     | 1         |
| cg06080729                          | CLDN6                         | 0.00332493        | 0.00332493           | 3.08532            | 3.08532                      | T up vs N                              | 11.872  | 11.8889   | 16.0234    | 1         |
| cg06081199                          | CFTR;CFTR                     | 0.00604854        | 0.00604854           | 3.92429            | 3.92429                      | T up vs N                              | 9.9946  | 17.5072   | 28.0268    | 1         |
| cg06084534                          | OR6K6                         | 0.00193547        | 0.00193547           | 0.238306           | -4.19628                     | T down vs N                            | 13.703  | 19.2655   | 22.4958    | 1         |
| cg06085657                          | B3GNT6                        | 5.16E-06          | 5.16E-06             | 0.21305            | -4.69373                     | T down vs N                            | 44.81   | 22.3928   | 7.99575    | 1         |
| cg06086141                          | PYCR2                         | 0.00024197        | 0.000241969          | 0.301976           | -3.31153                     | T down vs N                            | 22.069  | 13.4291   | 9.7362     | 1         |
| cg06086177                          | ZFH3                          | 0.00297594        | 0.00297594           | 0.237789           | -4.20542                     | T down vs N                            | 12.236  | 19.324    | 25.268     | 1         |
| cg06087457                          | C6orf162;C6orf162;GJB7        | 0.00051627        | 0.000516266          | 0.299001           | -3.34447                     | T down vs N                            | 18.757  | 13.652    | 11.6452    | 1         |
| cg06087473                          | IQCF1                         | 2.48E-05          | 2.48E-05             | 0.26821            | -3.72843                     | T down vs N                            | 34.179  | 16.2205   | 7.59317    | 1         |
| cg06087932                          | METTL7B                       | 7.62E-05          | 7.62E-05             | 0.217725           | -4.59295                     | T down vs N                            | 27.778  | 21.7686   | 12.5388    | 1         |
| cg06088639                          | ARPC1B                        | 0.00054892        | 0.000548924          | 0.098179           | -10.1855                     | T down vs N                            | 18.503  | 50.4544   | 43.6291    | 1         |
| cg06088745                          | IRX3                          | 2.00E-05          | 2.00E-05             | 21.3813            | 21.3813                      | T up vs N                              | 35.506  | 87.8454   | 39.5856    | 1         |
| cg06092310                          | MAN1C1                        | 0.00223815        | 0.00223815           | 0.275176           | -3.63404                     | T down vs N                            | 13.198  | 15.5946   | 18.9055    | 1         |
| cg06093460                          | SELE                          | 0.00232309        | 0.00232309           | 0.289774           | -3.45096                     | T down vs N                            | 13.07   | 14.3701   | 17.5914    | 1         |
| cg06096184                          | LRIG1                         | 0.00153078        | 0.00153078           | 0.310601           | -3.21957                     | T down vs N                            | 14.538  | 12.8048   | 14.093     | 1         |
| cg06097361                          | CRISPLD2                      | 2.29E-06          | 2.29E-06             | 0.207037           | -4.83005                     | T down vs N                            | 51.182  | 23.2297   | 7.2618     | 1         |
| TNFRSF18;TNFRSF18;TNFRSF18;TNFRSF18 |                               |                   |                      |                    |                              |                                        |         |           |            |           |
| cg06097659                          | F18;TNFRSF18;TNFRSF18         | 1.76E-05          | 1.76E-05             | 19.0913            | 19.0913                      | T up vs N                              | 36.318  | 81.4666   | 35.8907    | 1         |
| cg06098530                          | MYST4                         | 5.03E-06          | 5.03E-06             | 0.332852           | -3.00434                     | T down vs N                            | 44.99   | 11.3342   | 4.03085    | 1         |
| cg06100973                          | ELANE                         | 9.32E-05          | 9.32E-05             | 0.196211           | -5.09655                     | T down vs N                            | 26.718  | 24.8411   | 14.8758    | 1         |
| cg06101324                          | SPRR1A                        | 0.00058646        | 0.000586463          | 0.327875           | -3.04995                     | T down vs N                            | 18.231  | 11.6468   | 10.2215    | 1         |
|                                     |                               |                   |                      |                    |                              |                                        |         |           |            |           |
| cg06102419                          | LOC151174;LOC643387;LOC151174 | 0.00142702        | 0.00142702           | 5.11437            | 5.11437                      | T up vs N                              | 14.793  | 24.9477   | 26.9842    | 1         |
| cg06103624                          | SMAD6;SMAD6                   | 0.00033338        | 0.000333382          | 3.29298            | 3.29298                      | T up vs N                              | 20.629  | 13.3034   | 10.3182    | 1         |
| cg06103642                          | NR2E1                         | 1.52E-05          | 1.52E-05             | 0.034661           | -28.8509                     | T down vs N                            | 37.285  | 105.875   | 45.4339    | 1         |
| cg06106599                          | FADD                          | 1.16E-05          | 1.16E-05             | 0.178765           | -5.59394                     | T down vs N                            | 39.032  | 27.7631   | 11.3806    | 1         |
| cg06108360                          | CRISPLD2                      | 3.92E-06          | 3.92E-06             | 0.307367           | -3.25344                     | T down vs N                            | 46.881  | 13.0351   | 4.44871    | 1         |
| cg06112560                          | PLK1                          | 1.12E-05          | 1.12E-05             | 0.248598           | -4.02255                     | T down vs N                            | 39.305  | 18.1463   | 7.3868     | 1         |
| cg06112835                          | MRPL21;MRPL21                 | 0.00163971        | 0.00163971           | 0.296465           | -3.37308                     | T down vs N                            | 14.29   | 13.8453   | 15.5019    | 1         |
| cg06113789                          | TTBK1                         | 0.00041379        | 0.000413788          | 3.6223             | 3.6223                       | T up vs N                              | 19.691  | 15.5165   | 12.6079    | 1         |
| cg06114363                          | ZNF683;ZNF683                 | 0.00024261        | 0.000242607          | 0.320194           | -3.1231                      | T down vs N                            | 22.057  | 12.1472   | 8.81165    | 1         |
| cg06117855                          | CLEC3B;CLEC3B                 | 0.00109665        | 0.00109665           | 0.303052           | -3.29977                     | T down vs N                            | 15.77   | 13.3494   | 13.5443    | 1         |
| cg06118609                          | NLRP10                        | 0.00021287        | 0.000212867          | 0.262111           | -3.81518                     | T down vs N                            | 22.661  | 16.7925   | 11.8564    | 1         |
| cg06119874                          | PFKFB2;PFKFB2;YOD1            | 2.64E-06          | 2.64E-06             | 0.121223           | -8.24929                     | T down vs N                            | 50.008  | 41.7041   | 13.3432    | 1         |
| cg06121507                          | S100A12                       | 0.00278388        | 0.00278388           | 0.262745           | -3.80597                     | T down vs N                            | 12.458  | 16.7319   | 21.4889    | 1         |
| cg06122660                          | SLC2A14                       | 0.00493284        | 0.00493284           | 3.4428             | 3.4428                       | T up vs N                              | 10.617  | 14.3152   | 21.5727    | 1         |
| cg06123891                          | GYG1                          | 9.41E-05          | 9.41E-05             | 0.30987            | -3.22715                     | T down vs N                            | 26.673  | 12.8564   | 7.7121     | 1         |
| C15orf48;C15orf48;C15orf48;C15orf48 |                               |                   |                      |                    |                              |                                        |         |           |            |           |
| cg06123942                          | 8                             | 2.57E-05          | 2.57E-05             | 8.18549            | 8.18549                      | T up vs N                              | 33.952  | 41.3978   | 19.5086    | 1         |
| cg06127316                          | WEE1;WEE1                     | 1.48E-05          | 1.48E-05             | 0.134026           | -7.46123                     | T down vs N                            | 37.466  | 37.8297   | 16.1555    | 1         |
| cg06127335                          | SNED1                         | 0.00302744        | 0.00302744           | 0.325755           | -3.06979                     | T down vs N                            | 12.179  | 11.7827   | 15.4789    | 1         |
| cg06127862                          | FGF12                         | 7.67E-06          | 7.67E-06             | 17.5154            | 17.5154                      | T up vs N                              | 41.925  | 76.7766   | 29.3007    | 1         |
| cg06131879                          | IQCF5                         | 0.00017564        | 0.000175637          | 0.29528            | -3.38662                     | T down vs N                            | 24.47   | 13.117    | 8.04075    | 1         |
| cg06132069                          | SLC12A5;SLC12A5               | 0.00122375        | 0.00122375           | 3.64016            | 3.64016                      | T up vs N                              | 15.359  | 15.6353   | 16.2881    | 1         |
| cg06133145                          | PRIMA1                        | 0.00265947        | 0.00265947           | 4.73224            | 4.73224                      | T up vs N                              | 12.611  | 22.6301   | 28.7107    | 1         |
| cg06135425                          | PDE7B                         | 5.67E-05          | 5.67E-05             | 0.236223           | -4.23329                     | T down vs N                            | 29.378  | 19.5021   | 10.6213    | 1         |
| cg06136199                          | WEE1;WEE1                     | 2.81E-06          | 2.81E-06             | 0.123941           | -8.06836                     | T down vs N                            | 52.616  | 38.4302   | 10.9558    | 1         |
| cg06137032                          | C11orf9;C11orf9;DKFZP434K028  | 0.00244189        | 0.00244189           | 4.14847            | 4.14847                      | T up vs N                              | 12.9    | 18.9589   | 23.5149    | 1         |
| cg06137651                          | RGN;RGN                       | 0.00277403        | 0.00277403           | 0.315357           | -3.17101                     | T down vs N                            | 12.47   | 12.4741   | 16.0053    | 1         |

| Probeset ID | UCSC_REFGENE_NAME                   | p-value<br>(Type) | p-value (T vs.<br>N) | Ratio (T<br>vs. N) | Fold-<br>Change (T<br>vs. N) | Fold-Change (T vs.<br>N) (Description) | F(Type) | SS (Type) | SS (Error) | F (Error) |
|-------------|-------------------------------------|-------------------|----------------------|--------------------|------------------------------|----------------------------------------|---------|-----------|------------|-----------|
| cg06138468  | MTHFD1L                             | 2.77E-05          | 2.77E-05             | 0.333283           | -3.00046                     | T down vs N                            | 33.505  | 11.3076   | 5.3999     | 1         |
| cg06141846  | EMX2OS                              | 3.24E-05          | 3.24E-05             | 0.125497           | -7.96831                     | T down vs N                            | 32.58   | 40.3455   | 19.8139    | 1         |
| cg06143897  | RBM20                               | 0.00013775        | 0.000137745          | 0.160135           | -6.24471                     | T down vs N                            | 24.747  | 31.4259   | 20.3183    | 1         |
| cg06143901  | TCF15                               | 5.89E-05          | 5.89E-05             | 0.325204           | -3.07499                     | T down vs N                            | 29.165  | 11.8183   | 6.48348    | 1         |
| cg06144905  | PIPOX                               | 0.00080132        | 0.000801315          | 0.192542           | -5.19366                     | T down vs N                            | 16.979  | 25.4203   | 23.9549    | 1         |
| cg06145336  | HOXD3                               | 0.00036743        | 0.000367426          | 8.7771             | 8.7771                       | T up vs N                              | 20.204  | 44.1916   | 34.9967    | 1         |
| cg06150195  | CLEC16A                             | 0.00119148        | 0.00119148           | 0.301538           | -3.31633                     | T down vs N                            | 15.458  | 13.4616   | 13.9333    | 1         |
| cg06153538  | KIAA1715                            | 0.00019361        | 0.000193614          | 0.159052           | -6.28725                     | T down vs N                            | 23.106  | 31.6592   | 21.9232    | 1         |
| cg06154570  | HEYL                                | 4.84E-05          | 4.84E-05             | 3.94189            | 3.94189                      | T up vs N                              | 30.251  | 17.622    | 9.32051    | 1         |
| cg06155641  | GLT6D1                              | 1.32E-05          | 1.32E-05             | 0.191802           | -5.21371                     | T down vs N                            | 38.194  | 25.5393   | 10.6989    | 1         |
| cg06155771  | ZNRD1;NCRNA00171;ZNRD1              | 2.01E-06          | 2.01E-06             | 0.135947           | -7.35579                     | T down vs N                            | 52.288  | 37.2958   | 11.4125    | 1         |
| cg06156847  | IL1F7;IL1F7;IL1F7;IL1F7;IL1F7       | 0.00026935        | 0.000269354          | 0.223887           | -4.46654                     | T down vs N                            | 21.581  | 20.9788   | 15.5539    | 1         |
| cg06158434  | LEFTY2                              | 6.50E-06          | 6.50E-06             | 4.00473            | 4.00473                      | T up vs N                              | 45.589  | 16.9701   | 5.58364    | 1         |
| cg06161630  | EPHA1                               | 0.00310129        | 0.00310129           | 6.3909             | 6.3909                       | T up vs N                              | 12.1    | 32.2248   | 42.6118    | 1         |
| cg06164961  | CD3E                                | 0.00209467        | 0.00209467           | 0.29379            | -3.40379                     | T down vs N                            | 13.427  | 14.0526   | 16.7457    | 1         |
| cg06166785  | G6PC                                | 2.90E-05          | 2.90E-05             | 0.180098           | -3.14369                     | T down vs N                            | 33.23   | 12.2878   | 5.9165     | 1         |
| cg06166885  | 1-Mar                               | 0.00132609        | 0.00132609           | 0.232171           | -4.30717                     | T down vs N                            | 15.061  | 19.9726   | 21.2173    | 1         |
| cg06170425  | ADCY9                               | 1.76E-05          | 1.76E-05             | 0.233488           | -4.28288                     | T down vs N                            | 36.329  | 19.8182   | 8.72841    | 1         |
| cg06173461  | OR4X1                               | 1.46E-05          | 1.46E-05             | 0.273154           | -3.66093                     | T down vs N                            | 37.547  | 15.7733   | 6.72153    | 1         |
| cg06173758  | NPHP4                               | 1.38E-05          | 1.38E-05             | 0.289006           | -3.46014                     | T down vs N                            | 37.907  | 14.4318   | 6.09145    | 1         |
| cg06176750  | RBMXL2;RBMXL2                       | 0.00395654        | 0.00395654           | 0.309126           | -3.23492                     | T down vs N                            | 11.31   | 12.9093   | 18.2618    | 1         |
| cg06177627  | TCEA3;TCEA3                         | 0.00048827        | 0.000488266          | 4.95248            | 4.95248                      | T up vs N                              | 18.99   | 23.974    | 20.1991    | 1         |
| cg06177754  | MIR550-2                            | 5.90E-07          | 5.90E-07             | 0.293173           | -3.41096                     | T down vs N                            | 63.383  | 14.1009   | 3.55951    | 1         |
| cg06179765  | GNPMB;GNPMB                         | 6.75E-06          | 6.75E-06             | 17.4166            | 17.4166                      | T up vs N                              | 42.839  | 76.4734   | 28.5621    | 1         |
| cg06181069  | AQP10                               | 3.16E-07          | 3.16E-07             | 0.266067           | -3.75845                     | T down vs N                            | 69.756  | 16.4188   | 3.76602    | 1         |
| cg06181187  | CRYGB                               | 4.72E-06          | 4.72E-06             | 0.25095            | -3.98485                     | T down vs N                            | 45.466  | 17.9016   | 6.29972    | 1         |
| cg06181703  | C1orf159                            | 0.00270181        | 0.00270181           | 0.209965           | -4.76271                     | T down vs N                            | 12.558  | 22.8173   | 29.0705    | 1         |
| cg06182274  | MT1DP;MT1DP                         | 5.19E-06          | 5.19E-06             | 6.84086            | 6.84086                      | T up vs N                              | 44.764  | 34.6323   | 12.3787    | 1         |
| cg06183256  | RFT1                                | 0.00023527        | 0.000235265          | 0.308409           | -3.24245                     | T down vs N                            | 22.198  | 12.9604   | 9.34178    | 1         |
| cg06183338  | COL23A1                             | 1.86E-05          | 1.86E-05             | 66.3631            | 66.3631                      | T up vs N                              | 35.981  | 164.837   | 73.2999    | 1         |
| cg06186155  | HOXB3                               | 0.00224816        | 0.00224816           | 3.66875            | 3.66875                      | T up vs N                              | 13.183  | 15.85252  | 19.2074    | 1         |
| cg06186228  | LOC643486                           | 6.51E-05          | 6.51E-05             | 0.202374           | -4.94136                     | T down vs N                            | 28.616  | 23.9067   | 13.3668    | 1         |
| cg06187102  | CA5BP                               | 0.00218443        | 0.00218443           | 0.330429           | -3.02637                     | T down vs N                            | 13.282  | 11.4853   | 13.836     | 1         |
| cg06187103  | KIAA0040;KIAA0040;KIAA0040;KIAA0040 | 0.00010744        | 0.000107438          | 6.14787            | 6.14787                      | T up vs N                              | 25.991  | 30.8919   | 19.0173    | 1         |
| cg06188545  | PEAR1                               | 2.08E-05          | 2.08E-05             | 5.81153            | 5.81153                      | T up vs N                              | 35.28   | 29.0074   | 13.1553    | 1         |
| cg06190046  | OSGIN1;OSGIN1;OSGIN1                | 0.00022858        | 0.000228576          | 0.27695            | -3.61077                     | T down vs N                            | 22.331  | 15.4396   | 11.0625    | 1         |
| cg06196379  | TREM1                               | 0.00012513        | 0.000125126          | 0.287269           | -3.48106                     | T down vs N                            | 25.223  | 14.5723   | 9.24381    | 1         |
| cg06196828  | TSPAN12                             | 3.47E-06          | 3.47E-06             | 0.298984           | -3.34466                     | T down vs N                            | 47.842  | 13.6534   | 4.56617    | 1         |
| cg06197966  | SVIL                                | 2.63E-06          | 2.63E-06             | 0.191903           | -5.21098                     | T down vs N                            | 50.037  | 25.5231   | 8.16136    | 1         |
| cg06198390  | LCE2C                               | 0.00010961        | 0.000109614          | 0.271681           | -3.68078                     | T down vs N                            | 25.889  | 15.905    | 9.82981    | 1         |
| cg06201680  | WDR86                               | 0.00184535        | 0.00184535           | 3.82565            | 3.82565                      | T up vs N                              | 13.87   | 16.8613   | 19.4505    | 1         |
| cg06201861  | CRISPLD2                            | 0.00075244        | 0.000752435          | 0.300496           | -3.32783                     | T down vs N                            | 17.227  | 13.5395   | 12.575     | 1         |
| cg06205333  | RAP1A;RAP1A                         | 5.20E-05          | 5.20E-05             | 0.251785           | -3.97164                     | T down vs N                            | 29.855  | 17.8157   | 9.54797    | 1         |
| cg06205746  | ADPRHL1;ADPRHL1                     | 3.89E-05          | 3.89E-05             | 0.28773            | -3.47547                     | T down vs N                            | 31.499  | 14.5348   | 7.38295    | 1         |
| cg06208111  | ITM2A;ITM2A                         | 6.58E-07          | 6.58E-07             | 0.242359           | -4.1261                      | T down vs N                            | 62.325  | 18.8151   | 4.83019    | 1         |
| cg06208926  | TAF5L;TAF5L                         | 0.00041512        | 0.000415122          | 0.300742           | -3.32511                     | T down vs N                            | 19.677  | 13.5211   | 10.9942    | 1         |
| cg06210526  | CYP2F1                              | 0.00010992        | 0.000109924          | 0.146145           | -6.84251                     | T down vs N                            | 25.874  | 34.641    | 21.4211    | 1         |
| cg06210630  | ATP1A2                              | 0.00027049        | 0.000270493          | 0.198675           | -5.03334                     | T down vs N                            | 21.561  | 24.4619   | 18.1523    | 1         |
| cg06210915  | LIPJ;LIPJ                           | 2.10E-05          | 2.10E-05             | 0.287668           | -3.47623                     | T down vs N                            | 35.203  | 14.5399   | 6.60853    | 1         |
| cg06211724  | LAMC2;LAMC2;LAMC2;LAMC2             | 3.13E-05          | 3.13E-05             | 10.957             | 10.957                       | T up vs N                              | 32.782  | 53.6786   | 26.1992    | 1         |
| cg06212876  | NCRNA00161;NCRNA00161               | 4.49E-05          | 4.49E-05             | 0.165327           | -6.04863                     | T down vs N                            | 30.681  | 30.3407   | 15.8223    | 1         |
| cg06215107  | LRBA;MAB21L2                        | 0.00344489        | 0.00344489           | 5.93405            | 5.93405                      | T up vs N                              | 11.756  | 29.6993   | 40.4205    | 1         |
| cg06217046  | WWC3                                | 0.0001199         | 0.000119902          | 0.239544           | -4.1746                      | T down vs N                            | 25.436  | 19.1266   | 12.031     | 1         |
| cg06217303  | NCR3;NCR3;NCR3;NCR3;NCR3;NCR3       | 0.00042673        | 0.000426733          | 0.323144           | -3.0946                      | T down vs N                            | 19.56   | 11.9524   | 9.77725    | 1         |
| cg06217803  | SMO                                 | 4.89E-06          | 4.89E-06             | 0.223636           | -4.47156                     | T down vs N                            | 45.207  | 21.0103   | 7.43606    | 1         |
| cg06218285  | CD40;CD40                           | 3.70E-05          | 3.70E-05             | 0.240002           | -4.16663                     | T down vs N                            | 31.801  | 19.0754   | 9.59752    | 1         |
| cg06219125  | CACNG3                              | 0.00466357        | 0.00466357           | 0.246349           | -4.05928                     | T down vs N                            | 10.792  | 18.3841   | 27.2565    | 1         |
| cg06221946  | MARCKSL1                            | 0.00014395        | 0.000143948          | 3.53945            | 3.53945                      | T up vs N                              | 24.531  | 14.9636   | 9.76001    | 1         |
| cg06222184  | NISCH                               | 0.003775          | 0.003775             | 0.285619           | -3.50117                     | T down vs N                            | 11.461  | 14.7072   | 20.5325    | 1         |
| cg06223834  | ADCY9                               | 0.00729941        | 0.00729941           | 0.238729           | -4.18885                     | T down vs N                            | 9.4355  | 19.2179   | 32.5883    | 1         |
| cg06224510  | ITI12                               | 0.00010319        | 0.000103188          | 0.258363           | -3.87052                     | T down vs N                            | 26.196  | 17.1556   | 10.4782    | 1         |
| cg06226630  | ZAR1                                | 0.00020703        | 0.000207029          | 4.0333             | 4.0333                       | T up vs N                              | 22.791  | 18.2159   | 12.7882    | 1         |
| cg06228737  | ABAT                                | 2.98E-05          | 2.98E-05             | 0.181231           | -5.51781                     | T down vs N                            | 33.071  | 27.323    | 13.2189    | 1         |
| cg06230805  | AGPAT3;AGPAT3                       | 0.00125015        | 0.00125015           | 3.01239            | 3.01239                      | T up vs N                              | 15.279  | 11.3894   | 11.9266    | 1         |
| cg06232205  | GPR176                              | 0.00463745        | 0.00463745           | 0.316307           | -3.16149                     | T down vs N                            | 10.809  | 12.4092   | 18.3682    | 1         |
| cg06233985  | HBB                                 | 0.00327337        | 0.00327337           | 0.320462           | -3.12049                     | T down vs N                            | 11.923  | 12.1294   | 16.2775    | 1         |
| cg06235390  | KLB                                 | 1.16E-05          | 1.16E-05             | 5.32434            | 5.32434                      | T up vs N                              | 39.044  | 26.193    | 10.7338    | 1         |
| cg06235653  | DNASE1L2                            | 5.22E-06          | 5.22E-06             | 11.0245            | 11.0245                      | T up vs N                              | 44.723  | 53.9543   | 19.3027    | 1         |
| cg06241208  | C11orf46                            | 0.00225692        | 0.00225692           | 0.269677           | -3.70814                     | T down vs N                            | 13.169  | 16.0863   | 19.5441    | 1         |
| cg06241300  | APOM                                | 0.00069634        | 0.000696336          | 0.257147           | -3.88883                     | T down vs N                            | 17.536  | 17.2755   | 15.7624    | 1         |

[illegible]

| Probeset ID                     | UCSC_REFGENE_NAME           | p-value<br>(Type) | p-value (T vs.<br>N) | Ratio (T<br>vs. N) | Fold-<br>Change (T<br>vs. N) | Fold-Change (T vs.<br>N) (Description) | F(Type) | SS (Type) | SS (Error) | F (Error) |
|---------------------------------|-----------------------------|-------------------|----------------------|--------------------|------------------------------|----------------------------------------|---------|-----------|------------|-----------|
| cg06351337                      | CD53                        | 0.00060454        | 0.000604541          | 0.205292           | -4.87111                     | T down vs N                            | 18.107  | 23.4801   | 20.7478    | 1         |
| cg06351425                      | GPX6                        | 7.46E-05          | 7.46E-05             | 0.185533           | -5.38987                     | T down vs N                            | 27.891  | 26.5775   | 15.2466    | 1         |
| cg06351796                      | ATXN1;ATXN1                 | 1.27E-05          | 1.27E-05             | 0.240111           | -4.16474                     | T down vs N                            | 38.476  | 19.0633   | 7.92741    | 1         |
| cg06352088                      | SNORD89                     | 0.00025409        | 0.000254093          | 0.27495            | -3.63702                     | T down vs N                            | 21.845  | 15.6144   | 11.4364    | 1         |
| cg06352370                      | XKR8                        | 0.00712453        | 0.00712453           | 5.27747            | 5.27747                      | T up vs N                              | 9.5068  | 25.9167   | 43.6179    | 1         |
| cg06353345                      | OR51B4                      | 5.00E-06          | 5.00E-06             | 0.138042           | -7.2442                      | T down vs N                            | 45.034  | 36.7265   | 13.0484    | 1         |
| cg06353655                      | TCERG1L                     | 0.00014698        | 0.000146976          | 0.295552           | -3.3835                      | T down vs N                            | 24.429  | 13.9157   | 9.11432    | 1         |
| cg06355129                      | NES                         | 0.00030953        | 0.000309528          | 0.12878            | -7.76519                     | T down vs N                            | 20.957  | 39.3479   | 30.0404    | 1         |
| cg06357305                      | PTGIS                       | 0.00018041        | 0.000180407          | 0.252054           | -3.9674                      | T down vs N                            | 23.44   | 17.7881   | 12.1419    | 1         |
| cg06357561                      | STAT5A                      | 0.00053129        | 0.000531288          | 0.233061           | -4.29072                     | T down vs N                            | 18.638  | 19.8681   | 17.0558    | 1         |
| cg06359132                      | RRP12;RRP12                 | 9.48E-05          | 9.48E-05             | 0.294565           | -3.39484                     | T down vs N                            | 26.629  | 13.9922   | 8.40716    | 1         |
| cg06360703                      | LASS6                       | 0.00147141        | 0.00147141           | 0.268531           | -3.72397                     | T down vs N                            | 14.681  | 16.191    | 17.6458    | 1         |
| cg06363034                      | GMEB2                       | 1.11E-07          | 1.11E-07             | 0.274117           | -3.64808                     | T down vs N                            | 81.546  | 15.6879   | 3.07812    | 1         |
| cg06368590                      | TRPS1                       | 0.00209104        | 0.00209104           | 0.128555           | -7.77879                     | T down vs N                            | 14.658  | 32.7      | 29.0022    | 1         |
| cg06369407                      | SLC35F3                     | 0.00339613        | 0.00339613           | 0.312352           | -3.20151                     | T down vs N                            | 12.073  | 11.936    | 14.8301    | 1         |
| cg06369624                      | KCNS1                       | 8.12E-05          | 8.12E-05             | 3.68842            | 3.68842                      | T up vs N                              | 27.44   | 15.9557   | 9.30347    | 1         |
| cg06372145                      | DEFB119;DEFB119;DEFB119     | 0.00027046        | 0.000270462          | 0.210655           | -4.7471                      | T down vs N                            | 21.562  | 22.7215   | 16.8604    | 1         |
| cg06373377                      | CDC20                       | 2.74E-05          | 2.74E-05             | 0.126788           | -7.88721                     | T down vs N                            | 33.57   | 39.9488   | 19.0405    | 1         |
| cg06375148                      | C1orf74                     | 0.00036701        | 0.000367005          | 0.277705           | -3.60094                     | T down vs N                            | 20.209  | 15.3742   | 12.1723    | 1         |
| cg06375292                      | SLC35B1                     | 0.00630042        | 0.00630042           | 0.254507           | -3.92916                     | T down vs N                            | 9.872   | 17.539    | 28.4262    | 1         |
| cg06375876                      | CNOT6L                      | 0.00028802        | 0.000288019          | 0.330387           | -3.02675                     | T down vs N                            | 21.279  | 11.4879   | 8.63803    | 1         |
| cg06376238                      | TAF11                       | 2.75E-07          | 2.75E-07             | 0.193654           | -5.16385                     | T down vs N                            | 71.23   | 25.2429   | 5.67017    | 1         |
| cg06377106                      | VWA5B1                      | 0.00068771        | 0.000687705          | 3.4231             | 3.4231                       | T up vs N                              | 17.586  | 14.1826   | 12.9037    | 1         |
| cg06381803                      | EML2                        | 0.00408941        | 0.00408941           | 4.77486            | 4.77486                      | T up vs N                              | 11.205  | 22.8919   | 32.6874    | 1         |
| cg06383401                      | IL1F10                      | 2.69E-06          | 2.69E-06             | 0.13967            | -7.15971                     | T down vs N                            | 49.869  | 36.2927   | 11.6441    | 1         |
| cg06383709                      | HS3ST4                      | 0.00016794        | 0.000167941          | 0.143765           | -6.95579                     | T down vs N                            | 23.783  | 35.235    | 23.7046    | 1         |
| cg06385187                      | WFDC2                       | 1.29E-05          | 1.29E-05             | 20.296             | 20.296                       | T up vs N                              | 38.35   | 84.8822   | 35.4133    | 1         |
| cg06386210                      | MS4A13;MS4A13               | 0.0027873         | 0.0027873            | 0.330752           | -3.02341                     | T down vs N                            | 12.454  | 11.465    | 14.7294    | 1         |
| cg06387496                      | GNA12                       | 0.0017652         | 0.0017652            | 0.243933           | -4.09949                     | T down vs N                            | 14.027  | 18.6436   | 21.2656    | 1         |
| cg06387842                      | CHRD                        | 0.00146154        | 0.00146154           | 3.11807            | 3.11807                      | T up vs N                              | 14.705  | 12.1128   | 13.1792    | 1         |
| cg06388006                      | UBN2                        | 0.00115306        | 0.00115306           | 0.243851           | -4.10086                     | T down vs N                            | 15.581  | 18.6525   | 19.154     | 1         |
| cg06390368                      | ZNF598                      | 0.0016142         | 0.0016142            | 0.227636           | -4.39297                     | T down vs N                            | 19.749  | 12.4338   | 5.66636    | 1         |
| cg06392574                      | TMEM217;TMEM217             | 3.67E-05          | 3.67E-05             | 0.213609           | -4.68146                     | T down vs N                            | 31.833  | 22.317    | 11.2172    | 1         |
| cg06393354                      | OR2M3                       | 6.95E-06          | 6.95E-06             | 0.166475           | -6.0069                      | T down vs N                            | 42.626  | 30.1077   | 11.3011    | 1         |
| cg06399881                      | TMPRSS11B;TMPRSS11B         | 0.00054344        | 0.000543436          | 0.286875           | -3.48584                     | T down vs N                            | 18.545  | 14.6044   | 12.6005    | 1         |
| cg06400119                      | PTPRN2;PTPRN2;PTPRN2        | 0.00068016        | 0.000680158          | 0.214277           | -4.66686                     | T down vs N                            | 17.63   | 22.2268   | 20.1716    | 1         |
| cg06400301                      | OR2T33                      | 3.07E-06          | 3.07E-06             | 0.247259           | -4.04435                     | T down vs N                            | 48.798  | 18.2875   | 5.99614    | 1         |
| cg06400319                      | SPRR2B                      | 1.42E-05          | 1.42E-05             | 0.225083           | -4.44281                     | T down vs N                            | 37.714  | 20.8298   | 8.83704    | 1         |
| cg06401999                      | MGMT                        | 9.70E-05          | 9.70E-05             | 0.293424           | -3.40804                     | T down vs N                            | 26.516  | 14.0812   | 8.49678    | 1         |
| cg06402816                      | GAL3ST2                     | 0.00193184        | 0.00193184           | 7.65257            | 7.65257                      | T up vs N                              | 13.709  | 38.789    | 45.2711    | 1         |
| TCF7L2;TCF7L2;TCF7L2;TCF7L2     |                             |                   |                      |                    |                              |                                        |         |           |            |           |
| cg06403317                      | ;TCF7L2                     | 2.09E-05          | 2.09E-05             | 0.147047           | -6.80055                     | T down vs N                            | 35.249  | 34.4197   | 15.6236    | 1         |
| cg06404175                      | OXT                         | 0.00013092        | 0.000130923          | 12.4797            | 12.4797                      | T up vs N                              | 24.998  | 59.6729   | 38.1938    | 1         |
| cg06405186                      | SYT7                        | 0.00032734        | 0.000327336          | 0.288207           | -3.46973                     | T down vs N                            | 20.71   | 14.4962   | 11.1996    | 1         |
| cg06405517                      | MPV17L;MPV17L               | 0.00066258        | 0.000662576          | 0.168096           | -5.94899                     | T down vs N                            | 17.736  | 29.7833   | 26.8688    | 1         |
| cg06408078                      | LEF1;LEF1;LEF1;LOC641518    | 0.00311587        | 0.00311587           | 0.328847           | -3.04092                     | T down vs N                            | 12.084  | 11.585    | 15.3388    | 1         |
| cg06410191                      | LVRN                        | 1.41E-05          | 1.41E-05             | 6.50917            | 6.50917                      | T up vs N                              | 37.751  | 32.8652   | 13.9292    | 1         |
| cg06410866                      | TNMD;TNMD                   | 0.0065283         | 0.0065283            | 0.312263           | -3.20242                     | T down vs N                            | 9.7658  | 12.6882   | 20.7879    | 1         |
| cg06412669                      | RPTOR;RPTOR                 | 0.00033486        | 0.000334862          | 0.259413           | -3.85486                     | T down vs N                            | 20.61   | 17.053    | 13.2389    | 1         |
| cg06415573                      | KIAA1712;KIAA1712;FBXO8     | 1.34E-05          | 1.34E-05             | 0.283893           | -3.52245                     | T down vs N                            | 38.095  | 14.8498   | 6.23695    | 1         |
| cg06418721                      | ZFP41                       | 6.61E-05          | 6.61E-05             | 0.203299           | -4.91887                     | T down vs N                            | 28.537  | 23.7704   | 13.3274    | 1         |
| cg06418871                      | MARVELD2;MARVELD2           | 0.00014318        | 0.000143177          | 9.6077             | 9.6077                       | T up vs N                              | 24.557  | 47.9472   | 31.24      | 1         |
| S100A13;S100A13;S100A13;S100A13 |                             |                   |                      |                    |                              |                                        |         |           |            |           |
| cg06419659                      | 100A13;S100A13              | 0.00012821        | 0.000128206          | 10.7779            | 10.7779                      | T up vs N                              | 25.102  | 52.9422   | 33.7453    | 1         |
| cg06419732                      | CDK18;CDK18;CDK18           | 0.00061586        | 0.000615857          | 0.10651            | -9.38877                     | T down vs N                            | 18.032  | 46.9753   | 41.6827    | 1         |
| cg06422471                      | SHANK3                      | 7.17E-05          | 7.17E-05             | 6.70298            | 6.70298                      | T up vs N                              | 28.104  | 33.9027   | 19.3016    | 1         |
| cg06423357                      | NAT14                       | 0.00268665        | 0.00268665           | 0.249637           | -4.00582                     | T down vs N                            | 12.577  | 18.0378   | 22.9466    | 1         |
| cg06430061                      | C5orf37                     | 0.00211814        | 0.00211814           | 0.277402           | -3.60488                     | T down vs N                            | 13.388  | 15.4005   | 18.4049    | 1         |
| cg06433023                      | NR2E1                       | 0.00237941        | 0.00237941           | 0.22398            | -4.46469                     | T down vs N                            | 12.988  | 20.9672   | 25.8291    | 1         |
| cg06434255                      | OR2H2                       | 0.00044432        | 0.000444318          | 0.201177           | -4.97074                     | T down vs N                            | 19.388  | 24.0844   | 19.8759    | 1         |
| cg06435751                      | HGS                         | 1.35E-05          | 1.35E-05             | 0.25232            | -3.96322                     | T down vs N                            | 38.035  | 17.7609   | 7.47134    | 1         |
| cg06436658                      | ISPD;ISPD                   | 8.80E-05          | 8.80E-05             | 0.233093           | -4.29013                     | T down vs N                            | 27.019  | 19.8643   | 11.7632    | 1         |
| cg06436854                      | CBFA2T3                     | 1.85E-05          | 1.85E-05             | 0.156732           | -6.38032                     | T down vs N                            | 37.858  | 30.2751   | 11.9955    | 1         |
| cg06437799                      | DAP3;DAP3;YY1AP1;YY1AP1     | 1.69E-05          | 1.69E-05             | 0.194614           | -5.13837                     | T down vs N                            | 38.466  | 23.6151   | 9.20891    | 1         |
| cg06438942                      | C6orf48;C6orf48             | 3.44E-05          | 3.44E-05             | 0.17867            | -5.59692                     | T down vs N                            | 32.223  | 27.7803   | 13.7942    | 1         |
| cg06440087                      | ITIH2                       | 2.46E-05          | 2.46E-05             | 0.162309           | -6.16109                     | T down vs N                            | 34.225  | 30.965    | 14.4758    | 1         |
| cg06440275                      | MYOM2                       | 0.00111499        | 0.00111499           | 0.155147           | -6.44549                     | T down vs N                            | 15.707  | 32.521    | 33.1272    | 1         |
| cg06440348                      | PRDM8                       | 6.29E-06          | 6.29E-06             | 7.08554            | 7.08554                      | T up vs N                              | 43.341  | 35.9097   | 13.2567    | 1         |
| cg06440960                      | SYT11                       | 6.34E-05          | 6.34E-05             | 0.162016           | -6.17222                     | T down vs N                            | 28.763  | 31.0264   | 17.2591    | 1         |
| cg06442240                      | ITPRIPL2;ITPRIPL2;ITPRIPL2  | 0.00179803        | 0.00179803           | 0.328903           | -3.04041                     | T down vs N                            | 13.962  | 11.5815   | 13.2721    | 1         |
| cg06442372                      | RAB7L1;RAB7L1;RAB7L1;RAB7L1 | 0.00010894        | 0.000108941          | 0.280494           | -3.56514                     | T down vs N                            | 25.92   | 15.1353   | 9.34285    | 1         |
| cg06442489                      | ZSCAN18;ZSCAN18             | 0.00283593        | 0.00283593           | 0.277373           | -3.60525                     | T down vs N                            | 12.396  | 15.4029   | 19.8807    | 1         |

| Probeset ID | UCSC_REFGENE_NAME                   | p-value<br>(Type) | p-value (T vs.<br>N) | Ratio (T<br>vs. N) | Fold-<br>Change (T<br>vs. N) | Fold-Change (T vs.<br>N) (Description) | F(Type) | SS (Type) | SS (Error) | F (Error) |
|-------------|-------------------------------------|-------------------|----------------------|--------------------|------------------------------|----------------------------------------|---------|-----------|------------|-----------|
| cg06444207  | SCAMP3;CLK2;SCAMP3                  | 0.00272509        | 0.00272509           | 0.329224           | -3.03745                     | T down vs N                            | 12.53   | 11.5612   | 14.7634    | 1         |
| cg06447474  | A2BP1;A2BP1                         | 4.98E-05          | 4.98E-05             | 0.19194            | -5.20996                     | T down vs N                            | 30.097  | 25.517    | 13.5653    | 1         |
| cg06448442  | IL22RA2;IL22RA2;IL22RA2             | 0.00284224        | 0.00284224           | 0.286515           | -3.49021                     | T down vs N                            | 12.389  | 14.6338   | 18.8992    | 1         |
| cg06450373  | CDH18;CDH18                         | 0.00012053        | 0.000120532          | 0.223218           | -4.47993                     | T down vs N                            | 25.41   | 21.0628   | 13.2627    | 1         |
| cg06456531  | KRT26                               | 1.43E-05          | 1.43E-05             | 0.205428           | -4.86788                     | T down vs N                            | 37.664  | 23.4604   | 9.96613    | 1         |
| cg06457011  | PLCG1;PLCG1                         | 0.00089756        | 0.000897564          | 0.30214            | -3.30973                     | T down vs N                            | 16.536  | 13.4169   | 12.982     | 1         |
| cg06457736  | HRH1                                | 5.43E-05          | 5.43E-05             | 0.198393           | -5.04049                     | T down vs N                            | 29.612  | 24.5048   | 13.2405    | 1         |
| cg06459913  | TNP2                                | 0.00019639        | 0.000196386          | 0.311419           | -3.21111                     | T down vs N                            | 23.039  | 12.7473   | 8.85281    | 1         |
| cg06460652  | FGFR4;FGFR4;FGFR4                   | 0.00610215        | 0.00610215           | 0.168409           | -5.93791                     | T down vs N                            | 9.968   | 29.721    | 47.7064    | 1         |
| cg06466547  | OR5A2                               | 1.82E-05          | 1.82E-05             | 0.183619           | -5.44606                     | T down vs N                            | 36.126  | 26.9058   | 11.9165    | 1         |
| cg06470727  | OTOF                                | 3.66E-06          | 3.66E-06             | 0.278534           | -3.59023                     | T down vs N                            | 47.42   | 15.3028   | 5.1633     | 1         |
| cg06472636  | SLIT3                               | 4.19E-06          | 4.19E-06             | 0.314241           | -3.18228                     | T down vs N                            | 46.374  | 12.5509   | 4.33036    | 1         |
| cg06476685  | ANKMY1;ANKMY1                       | 3.34E-05          | 3.34E-05             | 5.20516            | 5.20516                      | T up vs N                              | 32.386  | 25.4886   | 12.5924    | 1         |
| cg06476693  | ADAMT58                             | 3.21E-05          | 3.21E-05             | 0.328469           | -3.04443                     | T down vs N                            | 32.622  | 11.609    | 5.69392    | 1         |
| cg06478504  | HDAC4                               | 0.00365181        | 0.00365181           | 0.176175           | -5.67617                     | T down vs N                            | 11.567  | 28.2358   | 39.0558    | 1         |
| cg06478823  | ACSM3;ACSM3                         | 3.36E-05          | 3.36E-05             | 0.183969           | -5.43571                     | T down vs N                            | 32.365  | 26.8454   | 13.2712    | 1         |
| cg06480663  | MS4A14;MS4A14                       | 0.00119922        | 0.00119922           | 0.255578           | -3.91269                     | T down vs N                            | 15.434  | 17.4315   | 18.0705    | 1         |
| cg06483441  | GIN1                                | 5.95E-05          | 5.95E-05             | 0.222235           | -4.49974                     | T down vs N                            | 29.107  | 21.187    | 11.6464    | 1         |
| cg06484232  | OR5E4                               | 0.00228093        | 0.00228093           | 0.222662           | -4.4911                      | T down vs N                            | 13.133  | 21.1329   | 25.7465    | 1         |
| cg06484274  | XRN1;XRN1                           | 1.37E-05          | 1.37E-05             | 0.10766            | -9.28853                     | T down vs N                            | 37.952  | 46.5261   | 19.6148    | 1         |
| cg06484514  | COL18A1                             | 7.13E-05          | 7.13E-05             | 0.210937           | -4.74075                     | T down vs N                            | 28.133  | 22.6824   | 12.9002    | 1         |
| cg06486093  | NKG7                                | 0.00046291        | 0.000462914          | 0.274953           | -3.63698                     | T down vs N                            | 19.214  | 15.6141   | 13.0021    | 1         |
| cg06486190  | MDFIC;MDFIC                         | 0.00163879        | 0.00163879           | 0.303889           | -3.29067                     | T down vs N                            | 14.292  | 13.2878   | 14.8756    | 1         |
| cg06486409  | MKLN1                               | 0.00037051        | 0.000370507          | 0.30601            | -3.26787                     | T down vs N                            | 20.168  | 13.133    | 10.4192    | 1         |
| cg06487442  | TOMM6                               | 0.00026725        | 0.000267247          | 0.328837           | -3.04102                     | T down vs N                            | 21.616  | 11.5857   | 8.57561    | 1         |
| cg06489586  | MED13                               | 2.11E-08          | 2.11E-08             | 0.171232           | -5.84002                     | T down vs N                            | 103.89  | 29.1689   | 4.4924     | 1         |
| cg06489609  | TAS2R39                             | 3.53E-06          | 3.53E-06             | 0.224388           | -4.45657                     | T down vs N                            | 47.696  | 20.9162   | 7.01658    | 1         |
| cg06489668  | RPL29                               | 7.71E-08          | 7.71E-08             | 0.223013           | -4.48405                     | T down vs N                            | 86.078  | 21.0887   | 3.91994    | 1         |
| cg06490287  | TCTE3                               | 0.0023219         | 0.0023219            | 0.329019           | -3.03933                     | T down vs N                            | 13.072  | 11.5741   | 14.1668    | 1         |
| cg06493694  | FBXW11;FBXW11;FBXW11                | 0.000666          | 0.000665998          | 0.243318           | -4.10985                     | T down vs N                            | 17.715  | 18.7104   | 16.8993    | 1         |
| cg06494497  | KIR2DS4                             | 2.51E-05          | 2.51E-05             | 0.171617           | -5.82692                     | T down vs N                            | 34.096  | 29.0947   | 13.653     | 1         |
| cg06494642  | ELMO3                               | 3.40E-07          | 3.40E-07             | 3.55196            | 3.55196                      | T up vs N                              | 68.988  | 15.0472   | 3.48983    | 1         |
| cg06496546  | PSG4;PSG4                           | 1.68E-05          | 1.68E-05             | 0.173653           | -5.7586                      | T down vs N                            | 36.635  | 28.7066   | 12.5374    | 1         |
| cg06497051  | TMEM79;TMEM79                       | 0.00151332        | 0.00151332           | 3.61079            | 3.61079                      | T up vs N                              | 14.579  | 15.4398   | 16.9447    | 1         |
| cg06498267  | HCN1                                | 0.00506325        | 0.00506325           | 3.554              | 3.554                        | T up vs N                              | 10.537  | 15.0609   | 22.8701    | 1         |
| cg06499213  | TRAF3IP2;TRAF3IP2;TRAF3IP2;TRAF3IP2 | 0.00614578        | 0.00614578           | 0.331              | -3.02115                     | T down vs N                            | 9.9466  | 11.4495   | 18.4176    | 1         |
| cg06501113  | LOC285780                           | 7.92E-05          | 7.92E-05             | 0.182828           | -5.46962                     | T down vs N                            | 27.574  | 27.0431   | 15.6919    | 1         |
| cg06501366  | BHMT2;DMGDH                         | 0.00106092        | 0.00106092           | 5.05697            | 5.05697                      | T up vs N                              | 15.895  | 24.6038   | 24.7662    | 1         |
| cg06501790  | SLC34A1;SLC34A1                     | 0.00014754        | 0.000147541          | 0.278112           | -3.59567                     | T down vs N                            | 24.41   | 15.339    | 10.0543    | 1         |
| cg06503831  | FLJ40504                            | 4.72E-05          | 4.72E-05             | 3.32321            | 3.32321                      | T up vs N                              | 30.398  | 13.5082   | 7.11015    | 1         |
| cg06505619  | WDR90;FAM195A                       | 0.00016632        | 0.000166322          | 0.308643           | -3.23999                     | T down vs N                            | 23.829  | 12.9437   | 8.69096    | 1         |
| cg06507434  | CDC42BPG                            | 0.00299567        | 0.00299567           | 0.269977           | -3.70403                     | T down vs N                            | 12.214  | 16.059    | 21.0364    | 1         |
| cg06509598  | TMCC1;TMCC1                         | 0.00013293        | 0.000132934          | 0.267341           | -3.74054                     | T down vs N                            | 24.922  | 16.3006   | 10.4649    | 1         |
| cg06516476  | NT5E                                | 6.72E-06          | 6.72E-06             | 0.330502           | -3.0257                      | T down vs N                            | 42.867  | 11.4807   | 4.28512    | 1         |
| cg06516947  | ARHGAP8;PRR5-ARHGAP8;ARHGAP8        | 0.00091044        | 0.000910441          | 7.66918            | 7.66918                      | T up vs N                              | 16.481  | 38.8716   | 37.7375    | 1         |
| cg06518233  | LZT52                               | 1.35E-05          | 1.35E-05             | 3.27421            | 3.27421                      | T up vs N                              | 38.028  | 13.1761   | 5.54381    | 1         |
| cg06519367  | OR52L1;OR52L1                       | 4.81E-05          | 4.81E-05             | 0.227393           | -4.39767                     | T down vs N                            | 30.287  | 20.5455   | 10.8538    | 1         |
| cg06521550  | MST1R                               | 0.0001305         | 0.000130497          | 3.27711            | 3.27711                      | T up vs N                              | 25.014  | 13.1958   | 8.44054    | 1         |
| cg06523556  | CHRNA6                              | 0.00116144        | 0.00116144           | 0.140349           | -7.12511                     | T down vs N                            | 15.554  | 36.1143   | 37.1501    | 1         |
| cg06526420  | GALNS                               | 4.51E-05          | 4.51E-05             | 0.327916           | -3.04956                     | T down vs N                            | 30.656  | 11.6442   | 6.07729    | 1         |
| cg06526872  | ARTN;ARTN;ARTN;ARTN;ARTN            | 6.11E-05          | 6.11E-05             | 3.6723             | 3.6723                       | T up vs N                              | 28.961  | 15.8487   | 8.75594    | 1         |
| cg06526960  | SELENBP1                            | 0.00154324        | 0.00154324           | 0.322444           | -3.10131                     | T down vs N                            | 14.508  | 11.9983   | 13.232     | 1         |
| cg06528559  | LOC100132215                        | 8.81E-05          | 8.81E-05             | 10.5568            | 10.5568                      | T up vs N                              | 27.011  | 52.0232   | 30.8165    | 1         |
| cg06528737  | USP6NL;USP6NL                       | 0.00482521        | 0.00482521           | 0.32374            | -3.0889                      | T down vs N                            | 10.686  | 11.9135   | 17.8384    | 1         |
| cg06530441  | CPT1B;CPT1B;CPT1B;CHKB-             | 0.00019243        | 0.000192431          | 3.49958            | 3.49958                      | T up vs N                              | 23.135  | 14.6966   | 10.1643    | 1         |
| cg06532379  | ALPK3                               | 1.13E-05          | 1.13E-05             | 10.686             | 10.686                       | T up vs N                              | 39.214  | 52.5615   | 21.446     | 1         |
| cg06532613  | IPO11;IPO11                         | 0.00017054        | 0.000170542          | 0.236047           | -4.23645                     | T down vs N                            | 23.709  | 19.5223   | 13.1746    | 1         |
| cg06532779  | GRIN3B                              | 6.08E-05          | 6.08E-05             | 0.087505           | -11.4279                     | T down vs N                            | 28.988  | 55.5825   | 30.6794    | 1         |
| cg06533629  | KLF14                               | 0.00653074        | 0.00653074           | 3.038              | 3.038                        | T up vs N                              | 9.7647  | 11.565    | 18.9498    | 1         |
| cg06537894  | MAST1                               | 1.61E-05          | 1.61E-05             | 25.7085            | 25.7085                      | T up vs N                              | 36.915  | 98.7367   | 42.7957    | 1         |
| cg06538549  | ITGB1;ITGB1                         | 0.00017407        | 0.000174069          | 0.320602           | -3.11913                     | T down vs N                            | 23.611  | 12.1201   | 8.21318    | 1         |
| cg06539006  | CPO                                 | 0.00030435        | 0.00030435           | 0.330439           | -3.02627                     | T down vs N                            | 21.032  | 11.4846   | 8.73674    | 1         |
| cg06542559  | PGCP                                | 4.74E-05          | 4.74E-05             | 0.287123           | -3.48283                     | T down vs N                            | 30.372  | 14.5842   | 7.683      | 1         |
| cg06543615  | GPR39;LYPD1;LYPD1                   | 0.00045522        | 0.000455222          | 0.290869           | -3.43798                     | T down vs N                            | 19.285  | 14.2828   | 11.8498    | 1         |
| cg06545019  | KLF4                                | 0.00261785        | 0.00261785           | 5.91154            | 5.91154                      | T up vs N                              | 12.665  | 29.5727   | 37.3614    | 1         |
| cg06551996  | NAV2;NAV2                           | 0.00125725        | 0.00125725           | 0.32583            | -3.06909                     | T down vs N                            | 15.258  | 11.7779   | 12.3503    | 1         |
| cg06553114  | MYPN                                | 0.00020267        | 0.000202669          | 0.28254            | -3.53932                     | T down vs N                            | 22.891  | 14.9627   | 10.4586    | 1         |
| cg06554744  | FLII                                | 0.00031301        | 0.000313009          | 4.29189            | 4.29189                      | T up vs N                              | 20.908  | 19.8755   | 15.2101    | 1         |

| Probeset ID                                                     | UCSC_REFGENE_NAME            | p-value<br>(Type) | p-value (T vs.<br>N) | Ratio (T<br>vs. N) | Fold-<br>Change (T<br>vs. N) | Fold-Change (T vs.<br>N) (Description) | F(Type) | SS (Type) | SS (Error) | F (Error) |
|-----------------------------------------------------------------|------------------------------|-------------------|----------------------|--------------------|------------------------------|----------------------------------------|---------|-----------|------------|-----------|
| cg06555281                                                      | KLHL31                       | 4.74E-05          | 4.74E-05             | 0.235911           | -4.23889                     | T down vs N                            | 30.376  | 19.5379   | 10.2914    | 1         |
| cg06563089                                                      | KCNC2;KCNC2;KCNC2            | 0.00069956        | 0.00069956           | 7.41076            | 7.41076                      | T up vs N                              | 17.517  | 37.5746   | 34.3198    | 1         |
| cg06564232                                                      | TFAP2B                       | 0.00081317        | 0.000813171          | 6.26463            | 6.26463                      | T up vs N                              | 16.921  | 31.5352   | 29.8186    | 1         |
| cg06565452                                                      | OR13C3                       | 3.26E-06          | 3.26E-06             | 0.153729           | -6.50495                     | T down vs N                            | 48.334  | 32.8424   | 10.8719    | 1         |
| cg06565975                                                      | SLURP1                       | 3.05E-05          | 3.05E-05             | 0.117184           | -8.53359                     | T down vs N                            | 32.936  | 43.0542   | 20.9154    | 1         |
| cg06568346                                                      | SPINT4                       | 0.00038012        | 0.000380115          | 0.294724           | -3.39301                     | T down vs N                            | 20.057  | 13.9798   | 11.1524    | 1         |
| cg06569139                                                      | RGS22                        | 0.00061037        | 0.000610367          | 0.225005           | -4.44434                     | T down vs N                            | 18.068  | 20.8394   | 18.4542    | 1         |
| cg06569913                                                      | PANX1                        | 0.00069453        | 0.000694529          | 0.232772           | -4.29605                     | T down vs N                            | 17.546  | 19.902    | 18.1481    | 1         |
| cg06570432                                                      | SORCS2                       | 8.59E-05          | 8.59E-05             | 0.260091           | -3.8448                      | T down vs N                            | 27.147  | 16.9871   | 10.0121    | 1         |
| cg06572160                                                      | KCNC3                        | 0.00324803        | 0.00324803           | 5.85212            | 5.85212                      | T up vs N                              | 11.948  | 29.2374   | 39.1526    | 1         |
| PCDHGA4;PCDHGA9;PCDHGA1;PCDHG<br>B1;PCDHGB6;PCDHGB3;PCDHGA11;PC |                              |                   |                      |                    |                              |                                        |         |           |            |           |
| cg06572465                                                      | DHGB7;PCDHGA6;PCDHGA8;PCDHGA | 0.00014811        | 0.000148114          | 10.0147            | 10.0147                      | T up vs N                              | 24.391  | 49.7219   | 32.6165    | 1         |
| cg06573088                                                      | CAP2                         | 7.08E-07          | 7.08E-07             | 0.313097           | -3.1939                      | T down vs N                            | 61.62   | 12.6301   | 3.27947    | 1         |
| cg06573570                                                      | AKR1C4                       | 0.00010414        | 0.000104142          | 0.332856           | -3.0043                      | T down vs N                            | 26.149  | 11.334    | 6.93497    | 1         |
| cg06573604                                                      | LY75                         | 9.97E-05          | 9.97E-05             | 9.07759            | 9.07759                      | T up vs N                              | 26.372  | 45.5719   | 27.6488    | 1         |
| cg06573795                                                      | AGGF1                        | 0.0021749         | 0.0021749            | 0.263584           | -3.79385                     | T down vs N                            | 13.297  | 16.6522   | 20.0377    | 1         |
| cg06574757                                                      | PPM1L                        | 0.00219082        | 0.00219082           | 0.310658           | -3.21897                     | T down vs N                            | 13.604  | 12.0478   | 13.2843    | 1         |
| PCDHGA4;PCDHGA2;PCDHGA5;PCDHG<br>B2;PCDHGA1;PCDHGB1;PCDHGA3;PC  |                              |                   |                      |                    |                              |                                        |         |           |            |           |
| cg06575035                                                      | DHGA5                        | 0.00047954        | 0.000479542          | 3.70114            | 3.70114                      | T up vs N                              | 19.066  | 16.0399   | 13.4607    | 1         |
| cg06576557                                                      | PLUNC;PLUNC                  | 2.68E-05          | 2.68E-05             | 0.240633           | -4.1557                      | T down vs N                            | 33.709  | 19.0053   | 9.02076    | 1         |
| cg06577005                                                      | DHDDS;DHDDS                  | 0.00048735        | 0.000487354          | 4.7896             | 4.7896                       | T up vs N                              | 18.998  | 22.9823   | 19.3556    | 1         |
| cg06579354                                                      | CYP2F1                       | 0.00038454        | 0.000384542          | 0.312179           | -3.20329                     | T down vs N                            | 20.006  | 12.6941   | 10.152     | 1         |
| cg06579738                                                      | C11orf92                     | 0.00018297        | 0.000182973          | 0.315388           | -3.1707                      | T down vs N                            | 23.373  | 12.472    | 8.53767    | 1         |
| cg06580014                                                      | C4orf52                      | 7.30E-05          | 7.30E-05             | 0.227248           | -4.40048                     | T down vs N                            | 28.003  | 20.5632   | 11.7492    | 1         |
| cg06580884                                                      | KLHL18                       | 0.00327895        | 0.00327895           | 3.31541            | 3.31541                      | T up vs N                              | 11.917  | 13.4554   | 18.0654    | 1         |
| A2BP1;A2BP1;A2BP1;A2BP1;A2BP1;A2                                |                              |                   |                      |                    |                              |                                        |         |           |            |           |
| cg06580966                                                      | BP1                          | 1.70E-06          | 1.70E-06             | 0.196801           | -5.08128                     | T down vs N                            | 53.71   | 24.7497   | 7.37279    | 1         |
| cg06584433                                                      | CUZD1                        | 0.00222463        | 0.00222463           | 0.320888           | -3.11635                     | T down vs N                            | 13.219  | 12.1011   | 14.6472    | 1         |
| cg06585203                                                      | EZR;EZR                      | 2.30E-05          | 2.30E-05             | 0.230801           | -4.33273                     | T down vs N                            | 34.632  | 20.1348   | 9.30238    | 1         |
| cg06587495                                                      | ENOX1                        | 0.00155666        | 0.00155666           | 0.321859           | -3.10695                     | T down vs N                            | 14.477  | 12.0369   | 13.3032    | 1         |
| cg06588028                                                      | LPAR5                        | 0.00078667        | 0.000786669          | 0.225919           | -4.42636                     | T down vs N                            | 17.051  | 20.7262   | 19.4483    | 1         |
| cg06589596                                                      | GSDMA                        | 0.00124159        | 0.00124159           | 0.271388           | -3.68476                     | T down vs N                            | 15.305  | 15.9314   | 16.6549    | 1         |
| cg06593906                                                      | COG5;COG5;COG5               | 0.00308127        | 0.00308127           | 0.135415           | -7.38473                     | T down vs N                            | 12.121  | 37.4427   | 49.4243    | 1         |
| cg06596075                                                      | GLIPR1L1                     | 3.27E-05          | 3.27E-05             | 0.201145           | -4.97154                     | T down vs N                            | 32.515  | 24.0893   | 11.8539    | 1         |
| cg06597858                                                      | TACR2                        | 5.71E-05          | 5.71E-05             | 0.250436           | -3.99304                     | T down vs N                            | 29.335  | 17.9548   | 9.79311    | 1         |
| cg06603325                                                      | HAP1;HAP1;HAP1               | 0.00242598        | 0.00242598           | 0.264568           | -3.77975                     | T down vs N                            | 12.922  | 16.5592   | 20.5033    | 1         |
| cg06604030                                                      | LOC401127                    | 1.45E-06          | 1.45E-06             | 0.319098           | -3.13383                     | T down vs N                            | 55.081  | 12.2205   | 3.54984    | 1         |
| cg06604589                                                      | NXN                          | 0.00019324        | 0.000193244          | 0.24694            | -4.04957                     | T down vs N                            | 23.115  | 18.3212   | 12.682     | 1         |
| cg06606539                                                      | MIR572                       | 0.00514423        | 0.00514423           | 0.315052           | -3.17408                     | T down vs N                            | 10.488  | 12.4951   | 19.0624    | 1         |
| cg06607594                                                      | NLRP2                        | 0.00018308        | 0.000183082          | 0.211312           | -4.73234                     | T down vs N                            | 23.37   | 22.6307   | 15.4936    | 1         |
| cg06613765                                                      | PIK3R6                       | 0.00179887        | 0.00179887           | 0.233515           | -4.28237                     | T down vs N                            | 13.96   | 19.815    | 22.7101    | 1         |
| cg06613817                                                      | HAO2;HAO2                    | 0.00039768        | 0.000397675          | 0.172517           | -5.79652                     | T down vs N                            | 19.862  | 28.9223   | 23.299     | 1         |
| cg06614118                                                      | BTNL3                        | 0.00212829        | 0.00212829           | 0.217147           | -4.60517                     | T down vs N                            | 14.107  | 19.4173   | 19.2701    | 1         |
| cg06614284                                                      | HCK                          | 9.45E-05          | 9.45E-05             | 0.226307           | -4.41877                     | T down vs N                            | 26.646  | 20.6785   | 12.4168    | 1         |
| cg06615152                                                      | AMH                          | 6.14E-06          | 6.14E-06             | 4.15199            | 4.15199                      | T up vs N                              | 43.524  | 18.9815   | 6.9778     | 1         |
| cg06617217                                                      | CNPY2                        | 0.00168754        | 0.00168754           | 0.316801           | -3.15656                     | T down vs N                            | 14.187  | 12.3756   | 13.9568    | 1         |
| cg06617418                                                      | AMMECR1;RGAG1                | 0.00099379        | 0.000993793          | 0.326774           | -3.06021                     | T down vs N                            | 16.144  | 11.7171   | 11.6126    | 1         |
| cg06618666                                                      | MMP3                         | 3.41E-05          | 3.41E-05             | 0.232013           | -4.31011                     | T down vs N                            | 32.263  | 19.9913   | 9.91418    | 1         |
| cg06619428                                                      | LCE2B                        | 9.98E-05          | 9.98E-05             | 0.267267           | -3.74158                     | T down vs N                            | 26.369  | 16.3074   | 9.89485    | 1         |
| cg06620200                                                      | MIR1283-1                    | 0.00022841        | 0.000228413          | 0.189989           | -5.26346                     | T down vs N                            | 22.334  | 25.8339   | 18.5073    | 1         |
| cg06623827                                                      | DRD1;DRD1                    | 0.00062785        | 0.00062785           | 3.97221            | 3.97221                      | T up vs N                              | 17.953  | 17.8194   | 15.8808    | 1         |
| cg06624056                                                      | LOC402644                    | 0.00214487        | 0.00214487           | 0.318855           | -3.13622                     | T down vs N                            | 13.345  | 12.2368   | 14.6716    | 1         |
| cg06625730                                                      | POLR3F                       | 0.00203248        | 0.00203248           | 0.206336           | -4.84646                     | T down vs N                            | 13.532  | 23.3299   | 27.5857    | 1         |
| cg06626599                                                      | KCNQ4;KCNQ4                  | 0.00077963        | 0.000779633          | 3.12775            | 3.12775                      | T up vs N                              | 17.087  | 12.179    | 11.4044    | 1         |
| cg06630241                                                      | SOC2                         | 0.00044355        | 0.000443548          | 0.207672           | -4.81529                     | T down vs N                            | 19.395  | 23.1395   | 19.0889    | 1         |
| cg06631160                                                      | RRN3P2                       | 0.00013153        | 0.000131533          | 0.225109           | -4.44229                     | T down vs N                            | 24.975  | 20.8265   | 13.3423    | 1         |
| cg06631317                                                      | CKK                          | 0.0017321         | 0.0017321            | 3.23289            | 3.23289                      | T up vs N                              | 14.095  | 12.8955   | 14.6389    | 1         |
| cg06632098                                                      | RET;RET                      | 0.00019504        | 0.000195039          | 0.28725            | -3.48129                     | T down vs N                            | 23.071  | 14.5739   | 10.1072    | 1         |
| cg06633013                                                      | PALM3                        | 5.02E-06          | 5.02E-06             | 0.081492           | -12.2712                     | T down vs N                            | 45.002  | 58.8786   | 20.9335    | 1         |
| cg06634441                                                      | UGT2A1                       | 0.00040019        | 0.000400186          | 0.326276           | -3.06489                     | T down vs N                            | 19.835  | 11.7491   | 9.47772    | 1         |
| cg06634717                                                      | RERE;RERE;RERE               | 6.58E-06          | 6.58E-06             | 19.6689            | 19.6689                      | T up vs N                              | 43.022  | 83.1216   | 30.9131    | 1         |
| cg06635133                                                      | XYLT1                        | 9.55E-05          | 9.55E-05             | 3.08511            | 3.08511                      | T up vs N                              | 26.595  | 11.8875   | 7.15171    | 1         |
| cg06635797                                                      | UHRF1;UHRF1                  | 2.33E-05          | 2.33E-05             | 0.262024           | -3.81645                     | T down vs N                            | 34.562  | 16.8008   | 7.77778    | 1         |
| cg06635900                                                      | TTC29                        | 0.00019852        | 0.000198517          | 0.290053           | -3.44764                     | T down vs N                            | 22.988  | 14.3478   | 9.98639    | 1         |
| cg06637774                                                      | P2RY6;P2RY6                  | 8.66E-06          | 8.66E-06             | 18.8063            | 18.8063                      | T up vs N                              | 41.067  | 80.6377   | 31.4174    | 1         |
| cg06638023                                                      | ZBTB45                       | 2.26E-05          | 2.26E-05             | 0.315959           | -3.16497                     | T down vs N                            | 34.765  | 12.433    | 5.72211    | 1         |
| cg06638515                                                      | SLC39A7;RXRB;SLC39A7         | 2.42E-05          | 2.42E-05             | 0.279162           | -3.58215                     | T down vs N                            | 34.321  | 15.2489   | 7.10878    | 1         |
| cg06638795                                                      | KCNQ3;KCNQ3                  | 1.36E-05          | 1.36E-05             | 12.9375            | 12.9375                      | T up vs N                              | 37.979  | 61.3885   | 25.862     | 1         |
| cg06639544                                                      | OR7A5                        | 6.25E-05          | 6.25E-05             | 0.227726           | -4.39124                     | T down vs N                            | 28.844  | 20.5049   | 11.3743    | 1         |

| Probeset ID | UCSC_REFGENE_NAME                                                   | p-value<br>(Type) | p-value (T vs.<br>N) | Ratio (T<br>vs. N) | Fold-<br>Change (T<br>vs. N) | Fold-Change (T vs.<br>N) (Description) | F(Type) | SS (Type) | SS (Error) | F (Error) |
|-------------|---------------------------------------------------------------------|-------------------|----------------------|--------------------|------------------------------|----------------------------------------|---------|-----------|------------|-----------|
| cg06640254  | KIAA1919                                                            | 0.00247633        | 0.00247633           | 0.234371           | -4.26675                     | T down vs N                            | 12.852  | 19.7155   | 24.5439    | 1         |
| cg06640279  | FAIM3;FAIM3;FAIM3                                                   | 0.00694635        | 0.00694635           | 0.323744           | -3.08886                     | T down vs N                            | 9.5816  | 11.9132   | 19.8935    | 1         |
| cg06640533  | CSNK2A2                                                             | 0.00011962        | 0.000119617          | 0.192497           | -5.1949                      | T down vs N                            | 25.448  | 25.4276   | 15.987     | 1         |
| cg06640630  | RD3;RD3                                                             | 0.00028424        | 0.000284239          | 3.43878            | 3.43878                      | T up vs N                              | 21.338  | 14.2882   | 10.7138    | 1         |
| cg06644051  | C7orf52                                                             | 0.00027912        | 0.00027912           | 3.41604            | 3.41604                      | T up vs N                              | 21.42   | 14.1351   | 10.5585    | 1         |
| cg06644553  | LVRN                                                                | 0.00061898        | 0.000618979          | 4.84548            | 4.84548                      | T up vs N                              | 18.011  | 23.3239   | 20.7197    | 1         |
| cg06645921  | SLC2A14                                                             | 0.00041178        | 0.000411776          | 5.67769            | 5.67769                      | T up vs N                              | 19.712  | 28.2445   | 22.9257    | 1         |
| cg06646780  | C6orf191                                                            | 1.60E-05          | 1.60E-05             | 0.260478           | -3.8391                      | T down vs N                            | 36.945  | 16.9496   | 7.34042    | 1         |
| cg06647068  | CHST11                                                              | 0.0006153         | 0.000615303          | 0.179645           | -5.56653                     | T down vs N                            | 18.035  | 27.605    | 24.4898    | 1         |
| cg06650256  | CD300LB                                                             | 0.00072663        | 0.000726634          | 0.322886           | -3.09707                     | T down vs N                            | 17.366  | 11.9693   | 11.0279    | 1         |
| cg06656105  | TRPV6                                                               | 0.00031235        | 0.000312352          | 0.316893           | -3.15564                     | T down vs N                            | 20.917  | 12.3693   | 9.46164    | 1         |
| cg06656958  | OR4B1                                                               | 6.05E-05          | 6.05E-05             | 0.305328           | -3.27517                     | T down vs N                            | 29.021  | 13.1826   | 7.2679     | 1         |
| cg06660015  | SLC4A9                                                              | 0.00225781        | 0.00225781           | 5.11807            | 5.11807                      | T up vs N                              | 13.168  | 24.9698   | 30.3403    | 1         |
| cg06666025  | CMTM2                                                               | 5.49E-06          | 5.49E-06             | 17.3411            | 17.3411                      | T up vs N                              | 44.342  | 76.2411   | 27.5102    | 1         |
| cg06670612  | CEACAM21;CEACAM21                                                   | 1.12E-07          | 1.12E-07             | 0.276451           | -3.61727                     | T down vs N                            | 81.498  | 15.483    | 3.03966    | 1         |
| cg06671706  | CLDN23                                                              | 2.74E-05          | 2.74E-05             | 4.10113            | 4.10113                      | T up vs N                              | 33.577  | 18.6542   | 8.88907    | 1         |
| cg06674527  | LOC390594                                                           | 0.0003842         | 0.000384199          | 3.42663            | 3.42663                      | T up vs N                              | 20.01   | 14.2065   | 11.3593    | 1         |
| cg06675455  | ORS1T1                                                              | 0.00026989        | 0.000269885          | 0.32636            | -3.0641                      | T down vs N                            | 21.572  | 11.7438   | 8.71054    | 1         |
| cg06676049  | KLHL29                                                              | 1.41E-05          | 1.41E-05             | 0.314822           | -3.1764                      | T down vs N                            | 37.746  | 12.5109   | 5.30321    | 1         |
| cg06678567  | HS3T4                                                               | 0.00192229        | 0.00192229           | 0.241109           | -4.1475                      | T down vs N                            | 13.726  | 18.9526   | 22.0918    | 1         |
| cg06678594  | THADA;THADA                                                         | 1.73E-05          | 1.73E-05             | 0.136103           | -7.34736                     | T down vs N                            | 36.42   | 37.253    | 16.366     | 1         |
| cg06679087  | MARVELD1;MARVELD1                                                   | 0.00024853        | 0.000248529          | 0.25008            | -3.99872                     | T down vs N                            | 21.946  | 17.9917   | 13.1169    | 1         |
| cg06679990  | GLI1;GLI1;GLI1                                                      | 3.56E-05          | 3.56E-05             | 0.224525           | -4.45386                     | T down vs N                            | 32.025  | 20.8992   | 10.4415    | 1         |
| cg06684407  | C21orf67;C21orf67                                                   | 4.62E-05          | 4.62E-05             | 0.210561           | -4.74921                     | T down vs N                            | 30.517  | 22.7345   | 11.9197    | 1         |
| cg06687489  | MYO5C                                                               | 0.00064184        | 0.00064184           | 0.269511           | -3.71043                     | T down vs N                            | 17.864  | 16.1014   | 14.4214    | 1         |
| cg06693048  | EYA1                                                                | 2.26E-07          | 2.26E-07             | 0.168479           | -5.93546                     | T down vs N                            | 73.389  | 29.7072   | 6.47666    | 1         |
| cg06694299  | WWTR1;WWTR1;WWTR1                                                   | 0.00032773        | 0.000327734          | 0.286562           | -3.48964                     | T down vs N                            | 20.704  | 14.6299   | 11.3058    | 1         |
| cg06696292  | NKX3-1                                                              | 0.00029833        | 0.000298327          | 0.175153           | -4.51064                     | T down vs N                            | 21.122  | 21.2552   | 16.1013    | 1         |
| cg06699422  | PSG2                                                                | 2.41E-05          | 2.41E-05             | 0.180962           | -5.52603                     | T down vs N                            | 34.357  | 27.3706   | 12.7466    | 1         |
| cg06700146  | BCL6B;BCL6B                                                         | 0.00036516        | 0.000365159          | 10.9281            | 10.9281                      | T up vs N                              | 20.231  | 53.5604   | 42.3597    | 1         |
| cg06700275  | C1QTNF1;C1QTNF1;C1QTNF1                                             | 0.00015729        | 0.000157285          | 0.322565           | -3.10015                     | T down vs N                            | 24.099  | 11.9904   | 7.96077    | 1         |
| cg06701191  | MIR223                                                              | 0.00036324        | 0.000363242          | 0.175153           | -5.7093                      | T down vs N                            | 20.254  | 28.4254   | 22.4556    | 1         |
| cg06707970  | CDH4                                                                | 3.07E-05          | 3.07E-05             | 0.300317           | -3.32981                     | T down vs N                            | 32.898  | 13.5529   | 6.5915     | 1         |
| cg06709089  | SENP3                                                               | 1.35E-06          | 1.35E-06             | 0.236721           | -4.22439                     | T down vs N                            | 55.693  | 19.4453   | 5.58647    | 1         |
| cg06709661  | MGMT                                                                | 0.00268534        | 0.00268534           | 0.331344           | -3.01801                     | T down vs N                            | 12.579  | 11.428    | 14.5361    | 1         |
| cg06710082  | HCG9                                                                | 7.77E-06          | 7.77E-06             | 16.553             | 16.553                       | T up vs N                              | 41.832  | 73.7756   | 28.218     | 1         |
| cg06710981  | DMPK;DMPK;DMPK;DMPK                                                 | 0.00145336        | 0.00145336           | 3.20351            | 3.20351                      | T up vs N                              | 14.726  | 12.6955   | 13.794     | 1         |
| cg06713830  | PPAN-P2RY11;SNORD105B;PPAN                                          | 4.00E-05          | 4.00E-05             | 0.266458           | -3.75294                     | T down vs N                            | 31.335  | 16.3825   | 8.36504    | 1         |
| cg06717971  | ARMCX5;ARMCX5;ARMCX5;ARMCX5;<br>A2BP1;A2BP1;A2BP1;A2BP1;A2BP1;A2BP1 | 8.28E-07          | 8.28E-07             | 0.314838           | -3.17624                     | T down vs N                            | 60.14   | 12.5098   | 3.32821    | 1         |
| cg06719334  | BP1                                                                 | 0.00220052        | 0.00220052           | 0.294898           | -3.39101                     | T down vs N                            | 13.256  | 13.9664   | 16.857     | 1         |
| cg06722121  | OTOP3                                                               | 4.97E-05          | 4.97E-05             | 0.317419           | -3.15041                     | T down vs N                            | 30.11   | 12.3337   | 6.55389    | 1         |
| cg06723829  | LGR6;LGR6;LGR6                                                      | 0.00038253        | 0.000382525          | 0.305395           | -3.27444                     | T down vs N                            | 20.029  | 13.1777   | 10.5268    | 1         |
| cg06723863  | ESRP2;ESRP2                                                         | 2.75E-05          | 2.75E-05             | 31.1708            | 31.1708                      | T up vs N                              | 33.555  | 110.802   | 52.8338    | 1         |
| cg06725798  | H1FOO                                                               | 0.00018834        | 0.000188338          | 0.243253           | -4.11094                     | T down vs N                            | 23.236  | 18.7174   | 12.8885    | 1         |
| cg06726231  | CECR1;CECR1                                                         | 1.18E-06          | 1.18E-06             | 0.19867            | -5.03346                     | T down vs N                            | 56.858  | 24.4626   | 6.8839     | 1         |
| cg06727242  | RAD51L1;RAD51L1;RAD51L1                                             | 2.74E-05          | 2.74E-05             | 0.198075           | -5.04859                     | T down vs N                            | 33.585  | 24.5535   | 11.6973    | 1         |
| cg06728055  | WWTR1;WWTR1;WWTR1                                                   | 0.00015718        | 0.000157179          | 0.260208           | -3.84308                     | T down vs N                            | 24.102  | 16.9757   | 11.2692    | 1         |
| cg06728232  | SPATA16                                                             | 0.00023056        | 0.000230564          | 0.221235           | -4.52008                     | T down vs N                            | 22.291  | 21.3142   | 15.299     | 1         |
| cg06730285  | APBB3;APBB3;SLC35A4;APBB3;APBB3                                     | 0.00071209        | 0.000712086          | 0.281101           | -3.55743                     | T down vs N                            | 17.447  | 15.0838   | 13.8332    | 1         |
| cg06730678  | VWF                                                                 | 8.63E-05          | 8.63E-05             | 7.23617            | 7.23617                      | T up vs N                              | 27.118  | 36.6854   | 21.645     | 1         |
| cg06730796  | FHOD1                                                               | 0.00051396        | 0.00051396           | 3.09677            | 3.09677                      | T up vs N                              | 18.776  | 11.9672   | 10.198     | 1         |
| cg06732439  | LOC151174;LOC643387;LOC151174                                       | 0.0003545         | 0.000354499          | 7.81923            | 7.81923                      | T up vs N                              | 20.36   | 39.6146   | 31.1316    | 1         |
| cg06734812  | BRUNOL5                                                             | 0.00028857        | 0.000288566          | 0.30957            | -3.23028                     | T down vs N                            | 21.27   | 12.8777   | 9.68692    | 1         |
| cg06734993  | ATP5SL;ATP5SL;ATP5SL;ATP5SL;ATP5SL                                  | 7.39E-06          | 7.39E-06             | 0.274627           | -3.64131                     | T down vs N                            | 42.182  | 15.6429   | 5.93355    | 1         |
| cg06735218  | ORS1E1                                                              | 0.00398143        | 0.00398143           | 0.292272           | -3.42147                     | T down vs N                            | 11.29   | 14.1717   | 20.0832    | 1         |
| cg06736138  | APOC4                                                               | 4.34E-06          | 4.34E-06             | 0.265959           | -3.75998                     | T down vs N                            | 46.111  | 16.4289   | 5.70063    | 1         |
| cg06738887  | ANXA2;ANXA2;ANXA2;ANXA2                                             | 0.00091502        | 0.000915023          | 0.259862           | -3.84819                     | T down vs N                            | 16.462  | 17.0093   | 16.5324    | 1         |
| cg06745145  | CDK14                                                               | 4.02E-05          | 4.02E-05             | 0.329858           | -3.03161                     | T down vs N                            | 31.306  | 11.5212   | 5.88833    | 1         |
| cg06746274  | MS4A13;MS4A13                                                       | 1.47E-06          | 1.47E-06             | 0.139613           | -7.16265                     | T down vs N                            | 54.923  | 36.3078   | 10.5771    | 1         |
| cg06746893  | BRUNOL5                                                             | 0.00011359        | 0.000113589          | 0.238715           | -4.18909                     | T down vs N                            | 25.708  | 19.2195   | 11.9615    | 1         |
| cg06747432  | CCDC8;CCDC8                                                         | 0.00212867        | 0.00212867           | 11.4578            | 11.4578                      | T up vs N                              | 13.371  | 55.7016   | 66.6537    | 1         |
| cg06748434  | EOMES                                                               | 0.00334226        | 0.00334226           | 0.257746           | -3.87979                     | T down vs N                            | 11.855  | 17.2164   | 23.2367    | 1         |
| cg06749213  | OR4K5                                                               | 9.64E-07          | 9.64E-07             | 0.206285           | -4.84766                     | T down vs N                            | 58.729  | 23.3372   | 6.35799    | 1         |
| cg06751446  | C15orf48;C15orf48                                                   | 0.00014296        | 0.000142962          | 4.09041            | 4.09041                      | T up vs N                              | 24.564  | 18.5851   | 12.1055    | 1         |
| cg06751920  | AADACL4                                                             | 0.00112895        | 0.00112895           | 0.292381           | -3.4202                      | T down vs N                            | 15.66   | 14.1631   | 14.4702    | 1         |
| cg06753439  | B3GALT4                                                             | 0.00043562        | 0.000435621          | 3.28583            | 3.28583                      | T up vs N                              | 19.472  | 13.2549   | 10.8916    | 1         |
| cg06756211  | CAPN2;CAPN2                                                         | 0.00010714        | 0.000107138          | 13.6089            | 13.6089                      | T up vs N                              | 26.005  | 63.8385   | 39.2782    | 1         |

| Probeset ID | UCSC_REFGENE_NAME                                                               | p-value<br>(Type) | p-value (T vs.<br>N) | Ratio (T<br>vs. N) | Fold-<br>Change (T<br>vs. N) | Fold-Change (T vs.<br>N) (Description) | F(Type) | SS (Type) | SS (Error) | F (Error) |
|-------------|---------------------------------------------------------------------------------|-------------------|----------------------|--------------------|------------------------------|----------------------------------------|---------|-----------|------------|-----------|
|             | PCDHGA4;PCDHGA1;PCDHGA6;PCDHGA5;PCDHGB1;PCDHGA3;PCDHGA2;PCDHGA6;PCDHGB2;PCDHGB3 |                   |                      |                    |                              |                                        |         |           |            |           |
| cg06757585  |                                                                                 | 0.00012885        | 0.00012885           | 5.09762            | 5.09762                      | T up vs N                              | 25.077  | 24.8475   | 15.8535    | 1         |
| cg06758327  | C1orf26;C1orf26                                                                 | 0.0003236         | 0.000323597          | 0.32549            | -3.07229                     | T down vs N                            | 20.76   | 11.7998   | 9.09411    | 1         |
| cg06758644  | VPS13D;VPS13D                                                                   | 1.05E-05          | 1.05E-05             | 0.323984           | -3.08657                     | T down vs N                            | 39.71   | 11.8975   | 4.79376    | 1         |
| cg06761873  | DPPA3                                                                           | 0.00032706        | 0.000327058          | 0.189839           | -5.26761                     | T down vs N                            | 20.713  | 25.8584   | 19.9742    | 1         |
| cg06765219  | ERICH1                                                                          | 0.00400382        | 0.00400382           | 0.218522           | -4.5762                      | T down vs N                            | 11.522  | 20.39     | 26.5455    | 1         |
| cg06765514  | PIP5KL1;PIP5KL1                                                                 | 0.00167315        | 0.00167315           | 5.39208            | 5.39208                      | T up vs N                              | 14.218  | 26.5905   | 29.9233    | 1         |
| cg06766817  | SYNJ2                                                                           | 3.37E-05          | 3.37E-05             | 0.328103           | -3.04782                     | T down vs N                            | 32.337  | 11.6323   | 5.75552    | 1         |
| cg06772202  | MDH2;STYXL1                                                                     | 7.38E-05          | 7.38E-05             | 0.168023           | -5.95158                     | T down vs N                            | 27.945  | 29.7978   | 17.0611    | 1         |
| cg06772221  | SLA;TG;SLA;SLA                                                                  | 5.05E-06          | 5.05E-06             | 0.313367           | -3.19115                     | T down vs N                            | 44.972  | 12.6114   | 4.48684    | 1         |
|             | KCNIP4;KCNIP4;KCNIP4;KCNIP4;KCNIP4                                              |                   |                      |                    |                              |                                        |         |           |            |           |
| cg06773116  | 4                                                                               | 1.16E-06          | 1.16E-06             | 0.204318           | -4.89434                     | T down vs N                            | 57.044  | 23.6214   | 6.6255     | 1         |
| cg06773216  | HCP5                                                                            | 0.00061213        | 0.000612129          | 4.43311            | 4.43311                      | T up vs N                              | 18.626  | 19.5471   | 15.7421    | 1         |
| cg06775759  | KLHL34                                                                          | 0.00332833        | 0.00332833           | 3.99859            | 3.99859                      | T up vs N                              | 11.868  | 17.9909   | 24.2542    | 1         |
| cg06779435  | CR2;CR2                                                                         | 9.26E-06          | 9.26E-06             | 0.302125           | -3.30988                     | T down vs N                            | 40.601  | 13.418    | 5.28781    | 1         |
| cg06780726  | C13orf16                                                                        | 0.00011014        | 0.000110135          | 0.304295           | -3.28628                     | T down vs N                            | 25.865  | 13.258    | 8.20147    | 1         |
| cg06784466  | FPR3                                                                            | 0.00012314        | 0.00012314           | 0.322892           | -3.09701                     | T down vs N                            | 25.303  | 11.9689   | 7.56837    | 1         |
| cg06785701  | LOC407835                                                                       | 0.00135675        | 0.00135675           | 0.258704           | -3.86543                     | T down vs N                            | 14.977  | 17.1223   | 18.2914    | 1         |
| cg06786630  | SUMF1;SUMF1;SUMF1                                                               | 0.0001401         | 0.000140097          | 0.262514           | -3.80932                     | T down vs N                            | 24.664  | 16.754    | 10.8688    | 1         |
| cg06788790  | RNF126P1                                                                        | 0.00063538        | 0.000635375          | 6.96522            | 6.96522                      | T up vs N                              | 17.905  | 35.2843   | 31.5304    | 1         |
| cg06789392  | MIR501;CLCN5;CLCN5                                                              | 0.00114818        | 0.00114818           | 0.319186           | -3.13297                     | T down vs N                            | 15.597  | 12.2146   | 12.5303    | 1         |
| cg06792975  | MUC7;MUC7;MUC7;MUC7                                                             | 5.06E-07          | 5.06E-07             | 0.128072           | -7.80772                     | T down vs N                            | 64.912  | 39.5579   | 9.75057    | 1         |
| cg06793849  | ODZ2                                                                            | 0.00049206        | 0.00049206           | 0.21779            | -4.59158                     | T down vs N                            | 18.958  | 21.76     | 18.3651    | 1         |
| cg06793867  | EVI5L;EVI5L                                                                     | 7.65E-06          | 7.65E-06             | 4.15381            | 4.15381                      | T up vs N                              | 41.942  | 18.9932   | 7.2455     | 1         |
| cg06794374  | LOC643955                                                                       | 3.07E-05          | 3.07E-05             | 0.170841           | -5.8534                      | T down vs N                            | 32.896  | 29.2446   | 14.2243    | 1         |
| cg06795233  | WNT6                                                                            | 3.93E-05          | 3.93E-05             | 5.47487            | 5.47487                      | T up vs N                              | 31.448  | 27.0736   | 13.7744    | 1         |
| cg06796611  | IL24;IL24;IL24;IL24                                                             | 4.10E-06          | 4.10E-06             | 0.313697           | -3.18779                     | T down vs N                            | 46.535  | 12.5885   | 4.32832    | 1         |
| cg06796713  | MEIS1                                                                           | 0.0024311         | 0.0024311            | 0.226116           | -4.42251                     | T down vs N                            | 12.915  | 20.702    | 25.647     | 1         |
| cg06797808  | TBX10                                                                           | 0.00076059        | 0.000760585          | 0.327384           | -3.05451                     | T down vs N                            | 17.185  | 11.6781   | 10.8731    | 1         |
| cg06798642  | TEC                                                                             | 0.00041047        | 0.000410467          | 20.4894            | 20.4894                      | T up vs N                              | 19.726  | 85.4179   | 69.2846    | 1         |
| cg06799305  | RPTOR;RPTOR                                                                     | 0.00079592        | 0.000795923          | 0.23458            | -4.26293                     | T down vs N                            | 17.005  | 19.6912   | 18.5271    | 1         |
| cg06799533  | MORN1                                                                           | 2.06E-05          | 2.06E-05             | 0.211103           | -4.73703                     | T down vs N                            | 35.323  | 22.6596   | 10.2639    | 1         |
| cg06800040  | GRN                                                                             | 0.00010172        | 0.000101721          | 0.171649           | -5.82583                     | T down vs N                            | 26.269  | 29.0886   | 17.717     | 1         |
| cg06800840  | OASL;OASL                                                                       | 0.00078093        | 0.000780929          | 0.303625           | -3.29354                     | T down vs N                            | 17.08   | 13.3072   | 12.4656    | 1         |
| cg06800962  | TM4SF1                                                                          | 8.18E-06          | 8.18E-06             | 0.200192           | -4.99521                     | T down vs N                            | 41.468  | 24.2322   | 9.34975    | 1         |
| cg06802641  | TAS1R3                                                                          | 0.0003359         | 0.000335903          | 0.174314           | -5.73676                     | T down vs N                            | 20.596  | 28.5822   | 22.2042    | 1         |
| cg06803995  | MKL1                                                                            | 5.32E-05          | 5.32E-05             | 0.235503           | -4.24623                     | T down vs N                            | 29.723  | 19.5847   | 10.5425    | 1         |
| cg06804210  | CD8A                                                                            | 0.00015357        | 0.000153569          | 4.39385            | 4.39385                      | T up vs N                              | 24.215  | 20.5214   | 13.5595    | 1         |
| cg06804311  | RNF222                                                                          | 0.00014996        | 0.000149958          | 0.175305           | -5.70435                     | T down vs N                            | 24.331  | 28.397    | 18.6741    | 1         |
| cg06804411  | LELP1                                                                           | 0.00088531        | 0.000885306          | 0.218722           | -4.57202                     | T down vs N                            | 16.589  | 21.6383   | 20.8696    | 1         |
| cg06805546  | TAGAP;TAGAP;TAGAP                                                               | 1.28E-06          | 1.28E-06             | 0.163263           | -6.12509                     | T down vs N                            | 56.145  | 30.7657   | 8.76752    | 1         |
| cg06805940  | ATP10B                                                                          | 8.56E-06          | 8.56E-06             | 0.178942           | -5.58841                     | T down vs N                            | 41.151  | 27.7312   | 10.7824    | 1         |
| cg06809252  | ALX3                                                                            | 0.00212608        | 0.00212608           | 6.54548            | 6.54548                      | T up vs N                              | 13.375  | 33.0606   | 39.5485    | 1         |
| cg06812574  | SLC39A12;SLC39A12                                                               | 2.35E-05          | 2.35E-05             | 0.172106           | -5.81037                     | T down vs N                            | 34.512  | 29.0009   | 13.4451    | 1         |
| cg06815950  | CUX2                                                                            | 6.22E-06          | 6.22E-06             | 0.151942           | -6.58145                     | T down vs N                            | 43.43   | 33.2538   | 12.2509    | 1         |
| cg06818047  | ACAP3                                                                           | 5.39E-05          | 5.39E-05             | 3.70541            | 3.70541                      | T up vs N                              | 29.657  | 16.0682   | 8.66893    | 1         |
| cg06818052  | NTN1                                                                            | 0.00090628        | 0.000906275          | 3.13372            | 3.13372                      | T up vs N                              | 16.499  | 12.2198   | 11.8505    | 1         |
| cg06818532  | BBX;BBX                                                                         | 1.63E-05          | 1.63E-05             | 0.222354           | -4.49734                     | T down vs N                            | 36.802  | 21.1719   | 9.20462    | 1         |
| cg06818851  | PLEKHN1;PLEKHN1                                                                 | 8.67E-06          | 8.67E-06             | 0.174015           | -5.74665                     | T down vs N                            | 41.058  | 28.6385   | 11.1604    | 1         |
| cg06819373  | PTPRN2;PTPRN2;PTPRN2                                                            | 0.00029505        | 0.000295049          | 0.249773           | -4.00364                     | T down vs N                            | 21.171  | 18.0236   | 13.6215    | 1         |
| cg06819431  | C1orf77;S100A13                                                                 | 0.00147842        | 0.00147842           | 0.317705           | -3.14757                     | T down vs N                            | 14.664  | 12.3143   | 13.4365    | 1         |
| cg06821075  | C10orf28                                                                        | 0.00014753        | 0.000147527          | 0.264595           | -3.77936                     | T down vs N                            | 24.41   | 16.5567   | 10.8522    | 1         |
| cg06821199  | CPLX1                                                                           | 0.00050588        | 0.000505878          | 5.4154             | 5.4154                       | T up vs N                              | 19.455  | 25.1547   | 19.3946    | 1         |
| cg06821774  | LMLN;IQCC;LMLN;LMLN;LMLN                                                        | 4.54E-05          | 4.54E-05             | 0.268471           | -3.7248                      | T down vs N                            | 30.612  | 16.1965   | 8.46537    | 1         |
| cg06822952  | LGALS1                                                                          | 0.00044495        | 0.000444949          | 0.234864           | -4.25778                     | T down vs N                            | 19.382  | 19.6583   | 16.2283    | 1         |
| cg06824423  | ARID1B;ARID1B;ARID1B                                                            | 6.22E-05          | 6.22E-05             | 3.4632             | 3.4632                       | T up vs N                              | 28.865  | 14.4524   | 8.01117    | 1         |
| cg06824720  | TNXB;TNXB                                                                       | 0.00113486        | 0.00113486           | 0.301496           | -3.31679                     | T down vs N                            | 15.641  | 13.4647   | 13.774     | 1         |
| cg06830064  | SOX11;SOX11                                                                     | 1.67E-08          | 1.67E-08             | 0.178372           | -5.60628                     | T down vs N                            | 107.36  | 27.8342   | 4.1483     | 1         |
| cg06831064  | CASKIN1                                                                         | 6.24E-05          | 6.24E-05             | 6.25161            | 6.25161                      | T up vs N                              | 28.851  | 31.4637   | 17.4488    | 1         |
| cg06832449  | PARD3                                                                           | 5.77E-05          | 5.77E-05             | 0.263909           | -3.78919                     | T down vs N                            | 29.275  | 16.6215   | 9.08436    | 1         |
| cg06835074  | LRIT2                                                                           | 0.00183962        | 0.00183962           | 0.29361            | -3.40588                     | T down vs N                            | 13.881  | 14.0666   | 16.2138    | 1         |
|             | KIAA0040;KIAA0040;KIAA0040;KIAA0040                                             |                   |                      |                    |                              |                                        |         |           |            |           |
| cg06835628  | 40                                                                              | 0.00012919        | 0.000129186          | 19.2626            | 19.2626                      | T up vs N                              | 25.064  | 81.9607   | 52.3205    | 1         |
| cg06838584  | KCNQ1;KCNQ1                                                                     | 1.38E-06          | 1.38E-06             | 0.203868           | -4.90514                     | T down vs N                            | 55.481  | 23.6871   | 6.83099    | 1         |
| cg06839377  | GBF1                                                                            | 6.11E-05          | 6.11E-05             | 0.310221           | -3.2235                      | T down vs N                            | 28.967  | 12.8316   | 7.0876     | 1         |
| cg06839900  | HE55                                                                            | 0.00730405        | 0.00730405           | 0.202396           | -4.9408                      | T down vs N                            | 9.6155  | 22.4973   | 35.0954    | 1         |
| cg06840801  | CHRN3                                                                           | 0.00192615        | 0.00192615           | 0.331911           | -3.01285                     | T down vs N                            | 13.719  | 11.3926   | 13.2864    | 1         |
| cg06841902  | OR3A2                                                                           | 6.77E-05          | 6.77E-05             | 0.193662           | -5.16362                     | T down vs N                            | 28.412  | 25.2416   | 14.2145    | 1         |
| cg06842071  | EFHD1;EFHD1                                                                     | 0.00019558        | 0.00019558           | 5.81704            | 5.81704                      | T up vs N                              | 23.058  | 29.0387   | 20.1501    | 1         |
| cg06846010  | MT1L                                                                            | 0.0033219         | 0.0033219            | 4.07502            | 4.07502                      | T up vs N                              | 11.875  | 18.4858   | 24.9082    | 1         |

| Probeset ID | UCSC_REFGENE_NAME                                                     | p-value<br>(Type) | p-value (T vs.<br>N) | Ratio (T<br>vs. N) | Fold-<br>Change (T<br>vs. N) | Fold-Change (T vs.<br>N) (Description) | F(Type) | SS (Type) | SS (Error) | F (Error) |
|-------------|-----------------------------------------------------------------------|-------------------|----------------------|--------------------|------------------------------|----------------------------------------|---------|-----------|------------|-----------|
| cg06846214  | OR2T6                                                                 | 0.00049935        | 0.000499351          | 0.236802           | -4.22294                     | T down vs N                            | 18.896  | 19.436    | 16.4571    | 1         |
| cg06847624  | PFN3                                                                  | 9.17E-06          | 9.17E-06             | 45.5949            | 45.5949                      | T up vs N                              | 40.666  | 136.66    | 53.7693    | 1         |
| cg06848148  | THSD7B                                                                | 0.00057785        | 0.000577849          | 0.276157           | -3.62113                     | T down vs N                            | 18.292  | 15.5086   | 13.5656    | 1         |
| cg06850285  | UBE2L3;UBE2L3;UBE2L3                                                  | 1.15E-06          | 1.15E-06             | 0.192411           | -5.19721                     | T down vs N                            | 57.162  | 25.4414   | 7.12118    | 1         |
| cg06850660  | NPFF                                                                  | 0.00082023        | 0.000820225          | 0.322569           | -3.10011                     | T down vs N                            | 16.887  | 11.9901   | 11.3602    | 1         |
| cg06852605  | DNAH17                                                                | 0.00327651        | 0.00327651           | 3.25713            | 3.25713                      | T up vs N                              | 11.92   | 13.0602   | 17.5312    | 1         |
| cg06854264  | C1orf106                                                              | 0.00020709        | 0.000207089          | 0.286783           | -3.48696                     | T down vs N                            | 22.79   | 14.6119   | 10.2587    | 1         |
| cg06854927  | MAPK8IP3;MAPK8IP3                                                     | 0.0002838         | 0.000283795          | 4.38               | 4.38                         | T up vs N                              | 21.345  | 20.4339   | 15.317     | 1         |
| cg06857304  | CYP26C1                                                               | 0.00129784        | 0.00129784           | 0.31866            | -3.13814                     | T down vs N                            | 15.141  | 12.2499   | 12.945     | 1         |
| cg06858087  | FRMD4A                                                                | 6.87E-06          | 6.87E-06             | 0.097057           | -10.3033                     | T down vs N                            | 42.707  | 50.9555   | 19.0903    | 1         |
| cg06861044  | UMOD;UMOD                                                             | 0.00148284        | 0.00148284           | 6.2052             | 6.2052                       | T up vs N                              | 14.653  | 31.2085   | 34.0777    | 1         |
| cg06866232  | OR5L1                                                                 | 2.36E-05          | 2.36E-05             | 0.289288           | -3.45676                     | T down vs N                            | 34.473  | 14.4091   | 6.68764    | 1         |
| cg06868955  | ATP5G2;ATP5G2                                                         | 1.44E-10          | 1.44E-10             | 0.207795           | -4.81244                     | T down vs N                            | 206.72  | 23.1221   | 1.7896     | 1         |
| cg06869512  | ABCB4;ABCB4;ABCB4                                                     | 2.45E-06          | 2.45E-06             | 0.112831           | -8.86281                     | T down vs N                            | 50.628  | 44.5879   | 14.0913    | 1         |
| cg06870470  | DOCK6                                                                 | 2.42E-05          | 2.42E-05             | 0.302151           | -3.3096                      | T down vs N                            | 34.334  | 13.4161   | 6.25212    | 1         |
| cg06870995  | AP3B2                                                                 | 0.00010789        | 0.000107886          | 10.1444            | 10.1444                      | T up vs N                              | 25.969  | 50.2787   | 30.9773    | 1         |
| cg06871919  | C5orf22                                                               | 0.0002179         | 0.000217895          | 0.149534           | -6.68746                     | T down vs N                            | 22.552  | 33.8202   | 23.994     | 1         |
| cg06871999  | LHFPL3                                                                | 0.0008332         | 0.000833199          | 0.305216           | -3.27637                     | T down vs N                            | 16.826  | 13.1907   | 12.5434    | 1         |
| cg06872010  | FAM66A                                                                | 1.07E-06          | 1.07E-06             | 0.268617           | -3.72277                     | T down vs N                            | 57.797  | 16.1831   | 4.47996    | 1         |
| cg06872138  | ETF1                                                                  | 2.47E-05          | 2.47E-05             | 0.205702           | -4.86141                     | T down vs N                            | 34.213  | 23.421    | 10.9532    | 1         |
| cg06872163  | CLPB                                                                  | 0.00403463        | 0.00403463           | 0.240694           | -4.15466                     | T down vs N                            | 11.496  | 17.8811   | 23.3305    | 1         |
| cg06872272  | ANKRD30A                                                              | 0.00018861        | 0.000188605          | 0.301437           | -3.31745                     | T down vs N                            | 23.229  | 13.4692   | 9.27733    | 1         |
| cg06872673  | PPIH                                                                  | 2.28E-05          | 2.28E-05             | 0.257643           | -3.88134                     | T down vs N                            | 34.699  | 17.2265   | 7.94322    | 1         |
| cg06874172  | C1orf92                                                               | 2.90E-05          | 2.90E-05             | 0.30177            | -3.31378                     | T down vs N                            | 33.235  | 13.4444   | 6.47247    | 1         |
| cg06874216  | MGMT                                                                  | 0.00040192        | 0.000401917          | 0.28008            | -3.57041                     | T down vs N                            | 19.816  | 15.1705   | 12.2491    | 1         |
| cg06875305  | CDH1                                                                  | 0.00011095        | 0.000110945          | 0.238953           | -4.18492                     | T down vs N                            | 25.828  | 19.1927   | 11.8898    | 1         |
| cg06878771  | CBLN4                                                                 | 6.28E-06          | 6.28E-06             | 0.287225           | -3.48159                     | T down vs N                            | 43.361  | 14.5759   | 5.37842    | 1         |
| cg06879302  | BMP2                                                                  | 0.00029753        | 0.000297533          | 0.316462           | -3.15994                     | T down vs N                            | 21.133  | 12.3986   | 9.38698    | 1         |
| cg06879394  | PHACTR1                                                               | 1.54E-06          | 1.54E-06             | 0.077753           | -12.8613                     | T down vs N                            | 54.533  | 61.1053   | 17.9282    | 1         |
| cg06882842  | ZNF678;ZNF678                                                         | 0.00045786        | 0.000457858          | 0.288636           | -3.46457                     | T down vs N                            | 19.261  | 14.4616   | 12.0133    | 1         |
| cg06882854  | SGCD;SGCD;SGCD                                                        | 7.94E-07          | 7.94E-07             | 0.276244           | -3.61998                     | T down vs N                            | 60.536  | 15.501    | 4.097      | 1         |
| cg06882926  | OR1G1                                                                 | 5.29E-05          | 5.29E-05             | 0.150767           | -6.63276                     | T down vs N                            | 29.757  | 33.5285   | 18.0278    | 1         |
| cg06884254  | LRRN4CL                                                               | 8.07E-05          | 8.07E-05             | 0.320384           | -3.12125                     | T down vs N                            | 27.47   | 12.1346   | 7.06794    | 1         |
| cg06886736  | IL28RA;IL28RA;IL28RA                                                  | 0.00042091        | 0.000420913          | 4.1184             | 4.1184                       | T up vs N                              | 19.618  | 18.7655   | 15.3046    | 1         |
| cg06890146  | MCPH1                                                                 | 0.00012982        | 0.000129824          | 0.169678           | -5.89351                     | T down vs N                            | 25.04   | 29.4711   | 18.8316    | 1         |
| cg06890291  | INTS1                                                                 | 0.00207114        | 0.00207114           | 0.326767           | -3.06029                     | T down vs N                            | 13.466  | 11.7177   | 13.9226    | 1         |
| cg06890813  | LOC100131726;FAM83A;FAM83A                                            | 5.78E-07          | 5.78E-07             | 0.212649           | -4.70258                     | T down vs N                            | 63.59   | 22.4474   | 5.64806    | 1         |
| cg06892501  | OR51B2                                                                | 5.87E-05          | 5.87E-05             | 0.219882           | -4.5479                      | T down vs N                            | 29.181  | 21.4879   | 11.7818    | 1         |
| cg06894549  | SNORA42;KIAA0907                                                      | 3.51E-05          | 3.51E-05             | 0.275529           | -3.62938                     | T down vs N                            | 32.095  | 15.5636   | 7.75874    | 1         |
| cg06899329  | NDUFA13;TSSK6                                                         | 0.00166508        | 0.00166508           | 0.303883           | -3.29074                     | T down vs N                            | 14.235  | 13.2882   | 14.9356    | 1         |
| cg06901189  | ZIM3                                                                  | 0.003544          | 0.003544             | 0.218463           | -4.57744                     | T down vs N                            | 11.664  | 21.672    | 29.728     | 1         |
| cg06901711  | PDI3P                                                                 | 4.14E-05          | 4.14E-05             | 8.50241            | 8.50241                      | T up vs N                              | 31.145  | 42.9073   | 22.0428    | 1         |
| cg06910100  | USHBP1                                                                | 0.00084612        | 0.000846115          | 0.32078            | -3.1174                      | T down vs N                            | 16.766  | 12.1083   | 11.5553    | 1         |
| cg06912272  | ELAVL3;ELAVL3                                                         | 0.00043384        | 0.000433844          | 5.75421            | 5.75421                      | T up vs N                              | 19.489  | 28.6816   | 23.5467    | 1         |
| cg06912297  | FLJ45079                                                              | 0.0002143         | 0.000214303          | 0.29616            | -3.37655                     | T down vs N                            | 22.63   | 13.8688   | 9.80572    | 1         |
| cg06912665  | LARP1                                                                 | 1.70E-05          | 1.70E-05             | 3.62261            | 3.62261                      | T up vs N                              | 36.546  | 15.5185   | 6.79416    | 1         |
| cg06913958  | BCL10                                                                 | 1.53E-05          | 1.53E-05             | 0.239551           | -4.17448                     | T down vs N                            | 37.212  | 19.1258   | 8.22342    | 1         |
| cg06921176  | OR5P2                                                                 | 0.00053068        | 0.000530684          | 0.206797           | -4.83565                     | T down vs N                            | 18.643  | 23.2639   | 19.966     | 1         |
| cg06921666  | TEAD4;TEAD4;TEAD4                                                     | 0.00112699        | 0.00112699           | 0.254852           | -3.92384                     | T down vs N                            | 15.667  | 17.5043   | 17.8764    | 1         |
| cg06923616  | CCDC102B;TMX3                                                         | 3.15E-06          | 3.15E-06             | 0.209369           | -4.77627                     | T down vs N                            | 48.589  | 22.9005   | 7.54106    | 1         |
| cg06924602  | SBSN;SBSN;SBSN                                                        | 0.00020191        | 0.000201911          | 0.265084           | -3.77238                     | T down vs N                            | 22.908  | 16.5107   | 11.5318    | 1         |
| cg06926314  | ANKRD33B                                                              | 0.00479002        | 0.00479002           | 3.44363            | 3.44363                      | T up vs N                              | 10.708  | 14.3208   | 21.3974    | 1         |
| cg06926703  | TMEM233                                                               | 9.26E-05          | 9.26E-05             | 0.226865           | -4.4079                      | T down vs N                            | 26.754  | 20.61     | 12.3254    | 1         |
| cg06926815  | RRN3                                                                  | 0.00126253        | 0.00126253           | 0.275475           | -3.6301                      | T down vs N                            | 15.243  | 15.5683   | 16.3417    | 1         |
| cg06928993  | BCAT2;BCAT2;BCAT2;BCAT2                                               | 2.16E-07          | 2.16E-07             | 0.141892           | -7.04762                     | T down vs N                            | 73.851  | 35.7131   | 7.73731    | 1         |
| cg06930722  | CHST11                                                                | 0.00080064        | 0.000800639          | 0.144338           | -6.92818                     | T down vs N                            | 16.982  | 35.0907   | 33.0614    | 1         |
| cg06933271  | ZNF416                                                                | 0.00015607        | 0.000156074          | 0.301193           | -3.32013                     | T down vs N                            | 24.136  | 13.4873   | 8.94076    | 1         |
| cg06933384  | COL4A3BP;COL4A3BP;COL4A3BP;POL                                        | 2.20E-05          | 2.20E-05             | 0.331712           | -3.01466                     | T down vs N                            | 34.923  | 11.405    | 5.22531    | 1         |
| cg06933574  | K                                                                     | 0.00077132        | 0.000771316          | 0.189974           | -5.26387                     | T down vs N                            | 17.129  | 25.8363   | 24.1332    | 1         |
| cg06933824  | PITX1                                                                 | 1.57E-05          | 1.57E-05             | 7.1438             | 7.1438                       | T up vs N                              | 37.053  | 36.2107   | 15.6361    | 1         |
| cg06936402  | NEURL1B                                                               | 5.53E-06          | 5.53E-06             | 0.178252           | -5.61002                     | T down vs N                            | 44.293  | 27.8558   | 10.0623    | 1         |
| cg06936631  | MMP20                                                                 | 6.99E-06          | 6.99E-06             | 11.5945            | 11.5945                      | T up vs N                              | 42.587  | 56.2447   | 21.1314    | 1         |
| cg06937593  | SHANK1                                                                | 0.00023987        | 0.000239865          | 0.291973           | -3.42497                     | T down vs N                            | 22.109  | 14.1952   | 10.273     | 1         |
| cg06938143  | MIR516B1                                                              | 0.0001727         | 0.000172704          | 0.214971           | -4.65178                     | T down vs N                            | 23.649  | 22.1336   | 14.9749    | 1         |
| cg06938143  | C8orf12                                                               | 0.0001727         | 0.000172704          | 0.214971           | -4.65178                     | T down vs N                            | 23.649  | 22.1336   | 14.9749    | 1         |
| cg06938264  | PCDHA6;PCDHA2;PCDHA1;PCDHA7;PCDHA1;PCDHA6;PCDHA5;PCDHA3;PCDHA4;PCDHA7 | 4.13E-05          | 4.13E-05             | 8.55897            | 8.55897                      | T up vs N                              | 31.153  | 43.1735   | 22.1735    | 1         |
| cg06939447  | TP73                                                                  | 0.00316636        | 0.00316636           | 0.294956           | -3.39033                     | T down vs N                            | 12.032  | 13.9618   | 18.5669    | 1         |
| cg06939851  | PYCR2                                                                 | 0.00235943        | 0.00235943           | 0.259709           | -3.85046                     | T down vs N                            | 13.017  | 17.0241   | 20.9254    | 1         |
| cg06943835  | ATG2A                                                                 | 0.00632415        | 0.00632415           | 0.255653           | -3.91156                     | T down vs N                            | 9.8607  | 17.4241   | 28.2722    | 1         |
| cg06945634  | RBPMS;RBPMS;RBPMS                                                     | 0.00125323        | 0.00125323           | 0.294699           | -3.39329                     | T down vs N                            | 15.27   | 13.9818   | 14.65      | 1         |

| Probeset ID | UCSC_REFGENE_NAME                                                            | p-value<br>(Type) | p-value (T vs.<br>N) | Ratio (T<br>vs. N) | Fold-<br>Change (T<br>vs. N) | Fold-Change (T vs.<br>N) (Description) | F(Type) | SS (Type) | SS (Error) | F (Error) |
|-------------|------------------------------------------------------------------------------|-------------------|----------------------|--------------------|------------------------------|----------------------------------------|---------|-----------|------------|-----------|
| cg06946838  | MDFIC;MDFIC;MDFIC                                                            | 5.90E-05          | 5.90E-05             | 0.305765           | -3.27049                     | T down vs N                            | 29.154  | 13.1508   | 7.21721    | 1         |
| cg06947286  | PDLIM4;PDLIM4                                                                | 9.83E-06          | 9.83E-06             | 0.202689           | -4.93366                     | T down vs N                            | 40.186  | 23.8601   | 9.49988    | 1         |
| cg06950683  | CBFA2T3                                                                      | 0.00032157        | 0.000321573          | 0.328464           | -3.04448                     | T down vs N                            | 20.788  | 11.6094   | 8.93539    | 1         |
|             | PCDHA6;PCDHA2;PCDHA1;PCDHA7;PCDHA1;PCDHA8;PCDHA6;PCDHA5;PCDHA1;PCDHA3;PCDHA4 | 0.00066863        | 0.000668625          | 4.29895            | 4.29895                      | T up vs N                              | 17.699  | 19.9204   | 18.0082    | 1         |
| cg06951122  | HA8;PCDHA3;PCDHA4                                                            | 5.70E-05          | 5.70E-05             | 11.1849            | 11.1849                      | T up vs N                              | 29.343  | 54.6059   | 29.7753    | 1         |
| cg06952752  | MARVELD3;MARVELD3                                                            | 0.00026644        | 0.000266437          | 0.324909           | -3.07778                     | T down vs N                            | 21.63   | 11.8374   | 8.75637    | 1         |
| cg06954677  | IDO2                                                                         | 0.00029392        | 0.000293921          | 0.209316           | -4.77747                     | T down vs N                            | 21.188  | 22.9079   | 17.2988    | 1         |
| cg06955716  | SLC39A9                                                                      | 0.00074059        | 0.000740591          | 0.224999           | -4.44446                     | T down vs N                            | 17.29   | 20.8401   | 19.285     | 1         |
| cg06957181  | AKAP3                                                                        | 8.99E-07          | 8.99E-07             | 0.326341           | -3.06428                     | T down vs N                            | 59.371  | 11.745    | 3.16517    | 1         |
| cg06957348  | CARD14;CARD14                                                                | 3.19E-06          | 3.19E-06             | 3.2336             | 3.2336                       | T up vs N                              | 48.498  | 12.9003   | 4.25596    | 1         |
| cg06961473  | LOC390594                                                                    | 0.00064878        | 0.000648778          | 4.27466            | 4.27466                      | T up vs N                              | 17.82   | 19.7659   | 17.7467    | 1         |
| cg06964230  | HES7;HES7                                                                    | 0.00045649        | 0.000456492          | 0.263809           | -3.79063                     | T down vs N                            | 19.273  | 16.6309   | 13.8064    | 1         |
| cg06964899  | SEC24C;SEC24C                                                                | 0.00034322        | 0.000343217          | 0.304956           | -3.27916                     | T down vs N                            | 20.501  | 13.2097   | 10.3093    | 1         |
| cg06966242  | AJAP1;AJAP1                                                                  | 0.0010292         | 0.0010292            | 3.28919            | 3.28919                      | T up vs N                              | 16.01   | 13.2777   | 13.2691    | 1         |
| cg06970510  | GRASP                                                                        | 0.00032169        | 0.00032169           | 7.88158            | 7.88158                      | T up vs N                              | 21.513  | 37.5729   | 26.1978    | 1         |
| cg06971418  | C17orf88                                                                     | 7.64E-06          | 7.64E-06             | 0.272954           | -3.66362                     | T down vs N                            | 41.948  | 15.7911   | 6.02317    | 1         |
| cg06971659  | C8orf80                                                                      | 0.00017934        | 0.000179343          | 0.217035           | -4.60756                     | T down vs N                            | 23.469  | 21.8593   | 14.9029    | 1         |
| cg06972908  | ITGAL;ITGAL                                                                  | 1.11E-05          | 1.11E-05             | 0.279645           | -3.57596                     | T down vs N                            | 39.352  | 15.2076   | 6.18317    | 1         |
| cg06973176  | SLC12A7                                                                      | 4.96E-05          | 4.96E-05             | 17.1945            | 17.1945                      | T up vs N                              | 30.12   | 75.7882   | 40.2593    | 1         |
| cg06976250  | ANKK1                                                                        | 0.00012851        | 0.000128514          | 0.260061           | -3.84525                     | T down vs N                            | 26.093  | 15.9906   | 9.1923     | 1         |
| cg06978604  | EXOC8                                                                        | 0.00207896        | 0.00207896           | 0.313081           | -3.19406                     | T down vs N                            | 13.453  | 12.6312   | 15.0227    | 1         |
| cg06979924  | FDPS;FDPS;FDPS                                                               | 0.0023815         | 0.0023815            | 0.314311           | -3.18156                     | T down vs N                            | 12.985  | 12.5461   | 15.4588    | 1         |
| cg06981309  | PLSCR1                                                                       | 0.00031872        | 0.000318718          | 3.36629            | 3.36629                      | T up vs N                              | 20.828  | 13.7995   | 10.6009    | 1         |
| cg06986584  | KIAA1614                                                                     | 1.04E-05          | 1.04E-05             | 0.105651           | -9.46512                     | T down vs N                            | 39.829  | 47.3156   | 19.0078    | 1         |
| cg06993494  | ORSA1                                                                        | 0.00367138        | 0.00367138           | 6.90481            | 6.90481                      | T up vs N                              | 11.55   | 34.9683   | 48.4403    | 1         |
| cg06995715  | FOX1                                                                         | 7.31E-06          | 7.31E-06             | 0.05472            | -18.275                      | T down vs N                            | 42.266  | 79.0703   | 29.9327    | 1         |
| cg06997767  | TRPS1                                                                        | 0.0002936         | 0.000293601          | 4.76363            | 4.76363                      | T up vs N                              | 21.193  | 22.823    | 17.2308    | 1         |
| cg06998965  | MARVELD2;MARVELD2                                                            | 0.00176852        | 0.00176852           | 0.112076           | -8.92251                     | T down vs N                            | 15.983  | 32.0448   | 24.0594    | 1         |
| cg07000290  | NHEDC1;NHEDC1                                                                | 5.31E-06          | 5.31E-06             | 3.75558            | 3.75558                      | T up vs N                              | 44.59   | 16.3999   | 5.88467    | 1         |
| cg07000567  | HLA-G                                                                        | 1.32E-05          | 1.32E-05             | 0.311126           | -3.21414                     | T down vs N                            | 38.203  | 12.7679   | 5.34735    | 1         |
| cg07001856  | C13orf91                                                                     | 1.43E-05          | 1.43E-05             | 9.86154            | 9.86154                      | T up vs N                              | 37.669  | 49.0589   | 20.8378    | 1         |
| cg07001856  | WFDC1                                                                        | 3.50E-05          | 3.50E-05             | 36.5934            | 36.5934                      | T up vs N                              | 32.119  | 121.377   | 60.4634    | 1         |
| cg07005055  | WNT2B;WNT2B                                                                  | 0.00063359        | 0.000633593          | 0.274622           | -3.64137                     | T down vs N                            | 17.916  | 15.6433   | 13.9701    | 1         |
| cg07005067  | B3GALT                                                                       | 0.00304768        | 0.00304768           | 5.42731            | 5.42731                      | T up vs N                              | 12.157  | 26.7964   | 35.266     | 1         |
| cg07006889  | RFX4                                                                         | 1.19E-05          | 1.19E-05             | 6.80599            | 6.80599                      | T up vs N                              | 38.908  | 34.4484   | 14.1663    | 1         |
| cg07007118  | CXCR7                                                                        | 8.02E-06          | 8.02E-06             | 13.4657            | 13.4657                      | T up vs N                              | 41.609  | 63.3224   | 24.3496    | 1         |
| cg07007400  | KRT7                                                                         | 0.00114929        | 0.00114929           | 0.232933           | -4.29307                     | T down vs N                            | 15.593  | 19.883    | 20.4016    | 1         |
| cg07007544  | GLRA1;GLRA1                                                                  | 2.84E-05          | 2.84E-05             | 0.227352           | -4.39847                     | T down vs N                            | 33.361  | 20.5505   | 9.85605    | 1         |
| cg07008343  | KRT28                                                                        | 9.07E-05          | 9.07E-05             | 0.20497            | -4.87876                     | T down vs N                            | 26.863  | 23.5267   | 14.0129    | 1         |
| cg07008784  | CDK18;CDK18;CDK18                                                            | 0.00122563        | 0.00122563           | 0.31558            | -3.16877                     | T down vs N                            | 15.353  | 12.4589   | 12.9839    | 1         |
| cg07010207  | FAM12B                                                                       | 0.00042649        | 0.000426491          | 3.49258            | 3.49258                      | T up vs N                              | 19.562  | 14.6496   | 11.9821    | 1         |
| cg07010228  | JSRP1                                                                        | 3.52E-06          | 3.52E-06             | 0.182535           | -5.47839                     | T down vs N                            | 47.719  | 27.0941   | 9.08455    | 1         |
| cg07010337  | NOTCH4                                                                       | 8.93E-05          | 8.93E-05             | 5.41208            | 5.41208                      | T up vs N                              | 26.942  | 26.7075   | 15.8608    | 1         |
| cg07011913  | HOXD4;MIR10B                                                                 | 0.00083937        | 0.000839365          | 0.242993           | -4.11535                     | T down vs N                            | 16.797  | 18.7458   | 17.8565    | 1         |
| cg07012178  | PRKAG2;PRKAG2;PRKAG2                                                         | 4.85E-05          | 4.85E-05             | 0.218601           | -4.57454                     | T down vs N                            | 30.248  | 21.654    | 11.4541    | 1         |
| cg07014020  | MCC                                                                          | 0.00034485        | 0.000344852          | 0.327936           | -3.04937                     | T down vs N                            | 20.481  | 11.6429   | 9.09582    | 1         |
| cg07015511  | DNAH17                                                                       | 6.23E-05          | 6.23E-05             | 0.234339           | -4.26732                     | T down vs N                            | 28.856  | 19.7192   | 10.934     | 1         |
| cg07016979  | MTX3;MTX3                                                                    | 5.99E-05          | 5.99E-05             | 0.287053           | -3.48368                     | T down vs N                            | 29.072  | 14.5899   | 8.02979    | 1         |
| cg07017135  | TNFRSF8                                                                      | 3.38E-06          | 3.38E-06             | 0.234449           | -4.26532                     | T down vs N                            | 48.038  | 19.7064   | 6.56367    | 1         |
| cg07017153  | IGF2BP1;IGF2BP1                                                              | 0.00184159        | 0.00184159           | 0.287349           | -3.48009                     | T down vs N                            | 13.877  | 14.5658   | 16.7938    | 1         |
| cg07018107  | MIR1208                                                                      | 6.12E-06          | 6.12E-06             | 0.136022           | -7.35173                     | T down vs N                            | 43.54   | 37.2752   | 13.6979    | 1         |
| cg07018580  | OR10V1                                                                       | 0.0006292         | 0.000629204          | 0.226798           | -4.4092                      | T down vs N                            | 17.945  | 20.6182   | 18.384     | 1         |
| cg07018760  | KRTAP12-4;C21orf29                                                           | 0.00725224        | 0.00725224           | 4.75279            | 4.75279                      | T up vs N                              | 10.417  | 16.2546   | 18.7246    | 1         |
| cg07020327  | CDC23                                                                        | 4.52E-05          | 4.52E-05             | 0.210173           | -4.75799                     | T down vs N                            | 30.637  | 22.7884   | 11.9013    | 1         |
| cg07022477  | HIF3A                                                                        | 0.00225608        | 0.00225608           | 0.330812           | -3.02286                     | T down vs N                            | 13.171  | 11.4612   | 13.9236    | 1         |
| cg07023704  | DLX2                                                                         | 0.00018576        | 0.000185755          | 4.22844            | 4.22844                      | T up vs N                              | 23.302  | 19.4712   | 13.3699    | 1         |
| cg07025583  | SOX30;SOX30                                                                  | 2.00E-05          | 2.00E-05             | 0.27734            | -3.60569                     | T down vs N                            | 35.509  | 15.4058   | 6.94165    | 1         |
| cg07026918  | DAB1                                                                         | 0.00020023        | 0.000200231          | 0.200299           | -4.99253                     | T down vs N                            | 22.947  | 24.216    | 16.8846    | 1         |
| cg07027075  | LIAS;RPL9;LIAS                                                               | 0.0018346         | 0.0018346            | 0.235321           | -4.24951                     | T down vs N                            | 13.891  | 19.6056   | 22.5826    | 1         |
| cg07027457  | CBFA2T3                                                                      | 0.00125851        | 0.00125851           | 0.27805            | -3.59648                     | T down vs N                            | 15.255  | 15.3444   | 16.0941    | 1         |
| cg07027613  | C1RL;LOC283314                                                               | 0.00713268        | 0.00713268           | 3.39898            | 3.39898                      | T up vs N                              | 9.5035  | 14.0202   | 23.6043    | 1         |
| cg07028869  | DNAJC22;DNAJC22                                                              | 0.00443451        | 0.00443451           | 11.8985            | 11.8985                      | T up vs N                              | 10.949  | 57.4389   | 83.9335    | 1         |
| cg07029873  | ESRRG;ESRRG                                                                  |                   |                      |                    |                              |                                        |         |           |            |           |
| cg07029975  | KCNMA1;KCNMA1;KCNMA1;KCNMA1                                                  | 9.40E-05          | 9.40E-05             | 0.238407           | -4.1945                      | T down vs N                            | 26.677  | 19.2541   | 11.5481    | 1         |
| cg07030950  | ALPK1;ALPK1                                                                  | 0.00111556        | 0.00111556           | 0.315478           | -3.16979                     | T down vs N                            | 15.705  | 12.4659   | 12.6998    | 1         |
| cg07032439  | SSTR4;SSTR4                                                                  | 5.28E-05          | 5.28E-05             | 0.272531           | -3.66931                     | T down vs N                            | 29.772  | 15.8289   | 8.50677    | 1         |
| cg07034850  | ID3                                                                          | 0.00569734        | 0.00569734           | 0.251498           | -3.97618                     | T down vs N                            | 10.176  | 17.8452   | 28.06      | 1         |
| cg07035961  | PCDHA1;PCDHA1;PCDHA2;PCDHA2                                                  | 0.00012435        | 0.000124348          | 6.40509            | 6.40509                      | T up vs N                              | 25.254  | 32.302    | 20.4652    | 1         |
| cg07037019  | OR10J5                                                                       | 1.45E-06          | 1.45E-06             | 0.101669           | -9.83587                     | T down vs N                            | 55.095  | 48.9472   | 14.2147    | 1         |

| Probeset ID                      | UCSC_REFGENE_NAME    | p-value<br>(Type) | p-value (T vs.<br>N) | Ratio (T<br>vs. N) | Fold-<br>Change (T<br>vs. N) | Fold-Change (T vs.<br>N) (Description) | F(Type) | SS (Type) | SS (Error) | F (Error) |
|----------------------------------|----------------------|-------------------|----------------------|--------------------|------------------------------|----------------------------------------|---------|-----------|------------|-----------|
| cg07037251                       | SHISA6               | 1.74E-05          | 1.74E-05             | 5.48565            | 5.48565                      | T up vs N                              | 36.405  | 27.1363   | 11.9265    | 1         |
| cg07037635                       | PIGB                 | 0.00080537        | 0.00080537           | 0.204442           | -4.89136                     | T down vs N                            | 16.959  | 23.6033   | 22.2687    | 1         |
| cg07039560                       | SLC25A2              | 0.00021544        | 0.000215439          | 4.02227            | 4.02227                      | T up vs N                              | 22.605  | 18.1445   | 12.8427    | 1         |
| cg07041214                       | ORS6A3               | 4.60E-07          | 4.60E-07             | 0.176405           | -5.66878                     | T down vs N                            | 65.864  | 28.1934   | 6.8489     | 1         |
| cg07041488                       | CACNG3               | 6.42E-05          | 6.42E-05             | 0.178617           | -5.59856                     | T down vs N                            | 28.697  | 27.7898   | 15.4942    | 1         |
| cg07042014                       | LTB4R;LTB4R;LTB4R    | 2.69E-05          | 2.69E-05             | 0.279792           | -3.57409                     | T down vs N                            | 33.694  | 15.1951   | 7.21554    | 1         |
| cg07042338                       | SUPT6H;SDF2          | 7.29E-05          | 7.29E-05             | 0.212398           | -4.70815                     | T down vs N                            | 28.01   | 22.4817   | 12.842     | 1         |
| cg07045891                       | LRRK1                | 2.90E-05          | 2.90E-05             | 13.841             | 13.841                       | T up vs N                              | 33.238  | 64.6683   | 31.1295    | 1         |
| cg07046870                       | PDIA5;PDIA5          | 2.79E-06          | 2.79E-06             | 0.237621           | -4.20839                     | T down vs N                            | 49.567  | 19.343    | 6.24382    | 1         |
| TSPAN4;TSPAN4;TSPAN4;TSPAN4;TSP  |                      |                   |                      |                    |                              |                                        |         |           |            |           |
| cg07047068                       | AN4;TSPAN4;TSPAN4    | 1.62E-07          | 1.62E-07             | 0.309607           | -3.22991                     | T down vs N                            | 77.119  | 12.8752   | 2.67121    | 1         |
| cg07048094                       | PTPRN2;PTPRN2;PTPRN2 | 0.0058206         | 0.0058206            | 0.279648           | -3.57592                     | T down vs N                            | 10.111  | 15.2073   | 24.0656    | 1         |
| cg07048132                       | MMP13                | 4.85E-07          | 4.85E-07             | 0.276851           | -3.61205                     | T down vs N                            | 65.337  | 15.4482   | 3.783      | 1         |
| cg07048608                       | SPTA1                | 4.82E-07          | 4.82E-07             | 0.11421            | -8.7558                      | T down vs N                            | 65.4    | 44.0928   | 10.7872    | 1         |
| cg07049592                       | HOXA5                | 0.00131317        | 0.00131317           | 3.63222            | 3.63222                      | T up vs N                              | 15.097  | 15.5825   | 16.514     | 1         |
| cg07053114                       | PTPRE                | 0.00062144        | 0.000621441          | 0.275832           | -3.62539                     | T down vs N                            | 17.995  | 15.537    | 13.8146    | 1         |
| cg07053162                       | PPL                  | 0.00017348        | 0.000173475          | 0.265149           | -3.77146                     | T down vs N                            | 23.627  | 16.5047   | 11.1767    | 1         |
| cg07053841                       | OR2W1                | 1.08E-06          | 1.08E-06             | 0.181747           | -5.50214                     | T down vs N                            | 57.725  | 27.2321   | 7.54812    | 1         |
| cg07054292                       | CYP27C1;CYP27C1      | 0.00125694        | 0.00125694           | 0.254791           | -3.92479                     | T down vs N                            | 15.259  | 17.5104   | 18.3604    | 1         |
| cg07054668                       | ITIH1;ITIH1          | 0.00012983        | 0.000129828          | 0.281876           | -3.54766                     | T down vs N                            | 25.04   | 15.0185   | 9.59664    | 1         |
| cg07055879                       | OR2A5                | 0.00071524        | 0.000715239          | 0.316686           | -3.1577                      | T down vs N                            | 17.429  | 12.3834   | 11.3682    | 1         |
| NCALD;NCALD;NCALD;NCALD;NCALD;   |                      |                   |                      |                    |                              |                                        |         |           |            |           |
| cg07056138                       | NCALD;NCALD          | 1.79E-06          | 1.79E-06             | 0.227203           | -4.40135                     | T down vs N                            | 53.226  | 20.5687   | 6.18308    | 1         |
| cg07058109                       | DHX58                | 0.00303193        | 0.00303193           | 3.20056            | 3.20056                      | T up vs N                              | 12.175  | 12.6755   | 16.6584    | 1         |
| cg07060233                       | SLC12A5;SLC12A5      | 0.00022701        | 0.000227011          | 6.33851            | 6.33851                      | T up vs N                              | 22.363  | 31.9395   | 22.8522    | 1         |
| cg07065217                       | CRIP1                | 6.51E-05          | 6.51E-05             | 3.48978            | 3.48978                      | T up vs N                              | 28.62   | 14.6309   | 8.17945    | 1         |
| cg07066369                       | CCND2                | 0.00049935        | 0.000499348          | 0.230989           | -4.3292                      | T down vs N                            | 19.512  | 18.9293   | 14.5519    | 1         |
| cg07066918                       | MKI67;MKI67          | 7.15E-05          | 7.15E-05             | 0.287431           | -3.4791                      | T down vs N                            | 28.115  | 14.5592   | 8.28555    | 1         |
| cg07067993                       | TMEM132D             | 0.00062708        | 0.000627083          | 0.207763           | -4.81317                     | T down vs N                            | 17.958  | 23.1265   | 20.6048    | 1         |
| cg07068358                       | HS3ST4               | 0.00085325        | 0.000853245          | 0.263241           | -3.79879                     | T down vs N                            | 16.733  | 16.6847   | 15.954     | 1         |
| cg07068956                       | ZAN;ZAN              | 0.00043597        | 0.000435966          | 0.260642           | -3.83668                     | T down vs N                            | 19.468  | 16.9337   | 13.9169    | 1         |
| cg07069090                       | LRP2                 | 2.08E-06          | 2.08E-06             | 0.169984           | -5.88291                     | T down vs N                            | 51.97   | 29.4113   | 9.05478    | 1         |
| cg07070138                       | MUC6                 | 0.00020414        | 0.000204135          | 0.287341           | -3.48018                     | T down vs N                            | 22.857  | 14.5665   | 10.1967    | 1         |
| cg07070466                       | TGIF2LX              | 1.21E-05          | 1.21E-05             | 0.119712           | -8.35336                     | T down vs N                            | 38.764  | 42.2011   | 17.4186    | 1         |
| cg07071478                       | C12orf54             | 0.00011637        | 0.000116371          | 0.210357           | -4.75383                     | T down vs N                            | 25.587  | 22.7628   | 14.2343    | 1         |
| cg07072643                       | EMR3;EMR3            | 0.00135596        | 0.00135596           | 0.196381           | -5.09214                     | T down vs N                            | 14.979  | 24.8147   | 26.5054    | 1         |
| cg07075840                       | PRR15                | 3.51E-05          | 3.51E-05             | 22.7505            | 22.7505                      | T up vs N                              | 32.096  | 91.4423   | 45.5841    | 1         |
| cg07078112                       | CA1;CA1;CA1;CA1;CA1  | 0.000107          | 0.000107002          | 0.305508           | -3.27324                     | T down vs N                            | 26.011  | 13.1695   | 8.10084    | 1         |
| cg07081739                       | PRSS16               | 1.80E-05          | 1.80E-05             | 0.257516           | -3.88325                     | T down vs N                            | 36.165  | 17.239    | 7.62674    | 1         |
| cg07085167                       | FBXO34;FBXO34        | 0.00043068        | 0.00043068           | 0.160403           | -6.23432                     | T down vs N                            | 19.952  | 31.3687   | 25.7116    | 1         |
| cg07086918                       | RGS14                | 3.69E-06          | 3.69E-06             | 0.194536           | -5.14044                     | T down vs N                            | 47.356  | 25.1034   | 8.48152    | 1         |
| cg07087850                       | RGL2;RGL2            | 0.00077709        | 0.0007770896         | 0.316103           | -3.16352                     | T down vs N                            | 17.131  | 12.4231   | 11.6027    | 1         |
| cg07088935                       | TPO;TPO;TPO;TPO      | 2.71E-05          | 2.71E-05             | 0.167264           | -5.97858                     | T down vs N                            | 33.651  | 29.9492   | 14.24      | 1         |
| cg07089660                       | DEFA4                | 1.63E-05          | 1.63E-05             | 0.214647           | -4.65881                     | T down vs N                            | 38.739  | 20.8725   | 8.08197    | 1         |
| cg07090653                       | LCE1B;LCE1B          | 0.00027738        | 0.000277377          | 0.176013           | -5.68141                     | T down vs N                            | 21.448  | 28.2658   | 21.086     | 1         |
| cg07090701                       | C1QL2                | 0.00079772        | 0.000797715          | 8.0893             | 8.0893                       | T up vs N                              | 16.997  | 40.9335   | 38.5337    | 1         |
| cg07092135                       | LOC285419;LOC285419  | 5.41E-06          | 5.41E-06             | 0.309126           | -3.23493                     | T down vs N                            | 44.458  | 12.9093   | 4.64594    | 1         |
| cg07094298                       | TNIP2;TNIP2          | 8.60E-06          | 8.60E-06             | 0.159806           | -6.25758                     | T down vs N                            | 41.114  | 31.4965   | 12.2573    | 1         |
| cg07099161                       | RAX                  | 0.00133594        | 0.00133594           | 0.181663           | -5.50469                     | T down vs N                            | 15.034  | 27.2469   | 28.9974    | 1         |
| cg07101980                       | NDUFC2               | 0.0002401         | 0.000240098          | 0.280706           | -3.56245                     | T down vs N                            | 22.104  | 15.1174   | 10.9425    | 1         |
| cg07104135                       | IPO9                 | 0.00036992        | 0.000369924          | 0.221784           | -4.50889                     | T down vs N                            | 20.174  | 21.2442   | 16.8485    | 1         |
| cg07107453                       | IFI49                | 4.00E-05          | 4.00E-05             | 0.312357           | -3.20146                     | T down vs N                            | 31.349  | 12.6816   | 6.47259    | 1         |
| cg07107916                       | PPP2R5A              | 0.00324544        | 0.00324544           | 0.297102           | -3.36585                     | T down vs N                            | 11.951  | 13.7966   | 18.4714    | 1         |
| cg07109115                       | MXK                  | 3.96E-05          | 3.96E-05             | 3.89558            | 3.89558                      | T up vs N                              | 31.397  | 17.3197   | 8.82625    | 1         |
| cg07109332                       | C1QA                 | 0.00010746        | 0.000107463          | 0.225684           | -4.43097                     | T down vs N                            | 27.055  | 19.5344   | 10.8305    | 1         |
| cg07109804                       | FAM103A1             | 0.00042129        | 0.000421287          | 0.292078           | -3.42375                     | T down vs N                            | 19.614  | 14.187    | 11.5728    | 1         |
| cg07112260                       | CES8                 | 1.20E-05          | 1.20E-05             | 6.83854            | 6.83854                      | T up vs N                              | 38.824  | 34.6201   | 14.2674    | 1         |
| cg07112337                       | CNGB1                | 0.00388979        | 0.00388979           | 4.44789            | 4.44789                      | T up vs N                              | 11.365  | 20.8617   | 29.3705    | 1         |
| cg07114886                       | GRM2;GRM2            | 3.05E-05          | 3.05E-05             | 0.304281           | -3.28643                     | T down vs N                            | 32.935  | 13.259    | 6.44135    | 1         |
| cg07115110                       | CCR1                 | 0.00668306        | 0.00668306           | 0.309389           | -3.23217                     | T down vs N                            | 9.6961  | 12.8906   | 21.2714    | 1         |
| cg07116972                       | CMTM7;CMTM7          | 0.00046143        | 0.000461434          | 0.196922           | -5.07816                     | T down vs N                            | 19.228  | 24.731    | 20.5793    | 1         |
| cg07117596                       | KIAA1804             | 0.00013699        | 0.000136993          | 0.20186            | -4.95393                     | T down vs N                            | 24.774  | 23.9828   | 15.4891    | 1         |
| LRRC27;LRRC27;LRRC27;LRRC27;LRRC |                      |                   |                      |                    |                              |                                        |         |           |            |           |
| cg07119315                       | 27                   | 0.00173962        | 0.00173962           | 0.18224            | -5.48727                     | T down vs N                            | 14.079  | 27.1457   | 30.8493    | 1         |
| cg07121721                       | NLRP1                | 0.00023278        | 0.000232784          | 0.228195           | -4.38222                     | T down vs N                            | 22.247  | 20.4479   | 14.7063    | 1         |
| cg07121856                       | PON3                 | 4.56E-05          | 4.56E-05             | 5.56354            | 5.56354                      | T up vs N                              | 30.592  | 27.5876   | 14.4285    | 1         |
| cg07123182                       | KCNQ10T1;KCNQ1;KCNQ1 | 8.00E-05          | 8.00E-05             | 0.139468           | -7.1701                      | T down vs N                            | 27.516  | 36.3462   | 21.1342    | 1         |
| cg07124117                       | PAX6;PAX6;PAX6       | 0.0001218         | 0.000121804          | 3.65209            | 3.65209                      | T up vs N                              | 25.358  | 15.7145   | 9.91551    | 1         |
| cg07126783                       | RPTOR;RPTOR          | 0.00717608        | 0.00717608           | 0.291306           | -3.43282                     | T down vs N                            | 9.4856  | 14.2481   | 24.0332    | 1         |
| cg07128890                       | PLACL1L              | 0.00039893        | 0.000398929          | 0.183834           | -5.4397                      | T down vs N                            | 19.848  | 26.8687   | 21.6595    | 1         |
| cg07128900                       | MTSSL1L              | 0.00093044        | 0.000930444          | 5.25323            | 5.25323                      | T up vs N                              | 16.397  | 25.7734   | 25.1495    | 1         |
| cg07131210                       | CYP2W1               | 0.00011487        | 0.000114867          | 0.161854           | -6.17842                     | T down vs N                            | 25.652  | 31.0607   | 19.3736    | 1         |

| Probeset ID                         | UCSC_REFGENE_NAME             | p-value<br>(Type) | p-value (T vs.<br>N) | Ratio (T<br>vs. N) | Fold-<br>Change (T<br>vs. N) | Fold-Change (T vs.<br>N) (Description) | F(Type) | SS (Type) | SS (Error) | F (Error) |
|-------------------------------------|-------------------------------|-------------------|----------------------|--------------------|------------------------------|----------------------------------------|---------|-----------|------------|-----------|
| cg07133760                          | LOC619207                     | 0.00079507        | 0.000795069          | 0.292849           | -3.41473                     | T down vs N                            | 17.01   | 14.1263   | 13.2878    | 1         |
| cg07135797                          | ZNRD1;NCRNA00171;ZNRD1        | 2.06E-05          | 2.06E-05             | 0.172499           | -5.79714                     | T down vs N                            | 35.323  | 28.9258   | 13.1025    | 1         |
| cg07136108                          | C11orf9;C11orf9               | 0.00151593        | 0.00151593           | 3.96916            | 3.96916                      | T up vs N                              | 14.573  | 17.7995   | 19.5427    | 1         |
| cg07136254                          | HFE2;HFE2;HFE2;HFE2           | 0.00034872        | 0.000348715          | 0.309596           | -3.23002                     | T down vs N                            | 20.432  | 12.8759   | 10.0831    | 1         |
| cg07139330                          | BAI1                          | 0.00683762        | 0.00683762           | 0.155033           | -6.45026                     | T down vs N                            | 10.038  | 28.4785   | 39.7173    | 1         |
| cg07139509                          | C14orf162                     | 0.00108627        | 0.00108627           | 0.124291           | -8.04564                     | T down vs N                            | 15.806  | 40.7219   | 41.2225    | 1         |
| cg07140194                          | EMX1                          | 2.52E-05          | 2.52E-05             | 0.193946           | -5.15607                     | T down vs N                            | 34.077  | 25.1966   | 11.8303    | 1         |
| cg07141317                          | RER1                          | 4.74E-05          | 4.74E-05             | 0.288581           | -3.46524                     | T down vs N                            | 30.372  | 14.4661   | 7.62074    | 1         |
| cg07143470                          | COL21A1                       | 0.00022378        | 0.000223784          | 15.7864            | 15.7864                      | T up vs N                              | 22.429  | 71.3036   | 50.8659    | 1         |
| cg07143532                          | COL24A1                       | 0.00221901        | 0.00221901           | 71.9089            | 71.9089                      | T up vs N                              | 13.228  | 171.205   | 207.09     | 1         |
| cg07145783                          | ITLN1                         | 1.13E-05          | 1.13E-05             | 0.254515           | -3.92903                     | T down vs N                            | 39.246  | 17.5382   | 7.15011    | 1         |
| cg07147383                          | FSCN2;FSCN2                   | 4.06E-06          | 4.06E-06             | 0.21058            | -4.74879                     | T down vs N                            | 46.617  | 22.7319   | 7.80206    | 1         |
| cg07147573                          | CYP8B1                        | 0.00090493        | 0.000904931          | 0.324678           | -3.07997                     | T down vs N                            | 16.504  | 11.8524   | 11.4902    | 1         |
| cg07148743                          | BRD9;BRD9;BRD9                | 0.00016855        | 0.000168553          | 0.242569           | -4.12253                     | T down vs N                            | 23.765  | 18.7921   | 12.6518    | 1         |
| cg07150038                          | FAM12A                        | 1.35E-05          | 1.35E-05             | 0.265908           | -3.76069                     | T down vs N                            | 38.064  | 16.4336   | 6.90771    | 1         |
| cg07150062                          | ASPG                          | 0.00041579        | 0.000415792          | 11.7655            | 11.7655                      | T up vs N                              | 19.671  | 56.9187   | 46.2978    | 1         |
| cg07150473                          | CHRNA2                        | 0.00024101        | 0.000241011          | 0.233349           | -4.28543                     | T down vs N                            | 22.087  | 19.8344   | 14.3683    | 1         |
| cg07151747                          | UPP2;UPP2                     | 0.00036355        | 0.000363553          | 0.232194           | -4.30675                     | T down vs N                            | 20.25   | 19.9699   | 15.7788    | 1         |
| cg07152591                          | CCNI2                         | 1.93E-05          | 1.93E-05             | 11.5399            | 11.5399                      | T up vs N                              | 35.753  | 56.0283   | 25.0737    | 1         |
| cg07153665                          | CMTM2                         | 2.95E-06          | 2.95E-06             | 8.19486            | 8.19486                      | T up vs N                              | 49.137  | 41.4429   | 13.4948    | 1         |
| cg07153966                          | HOXA3;HOXA3;HOXA3             | 0.005154          | 0.005154             | 6.96481            | 6.96481                      | T up vs N                              | 10.482  | 35.2821   | 53.8561    | 1         |
| cg07155223                          | ESRRG                         | 0.00438882        | 0.00438882           | 10.0745            | 10.0745                      | T up vs N                              | 10.982  | 49.9791   | 72.8162    | 1         |
| cg07156249                          | PSMB9;PSMB9;TAP1              | 4.91E-06          | 4.91E-06             | 0.17662            | -5.66186                     | T down vs N                            | 45.17   | 28.1537   | 9.97246    | 1         |
| cg07157107                          | CHRNA6                        | 1.37E-05          | 1.37E-05             | 0.179651           | -5.56635                     | T down vs N                            | 37.958  | 77.6039   | 13.6355    | 1         |
| cg07157602                          | IFRD1;IFRD1                   | 0.00062609        | 0.000626091          | 5.83894            | 5.83894                      | T up vs N                              | 20.019  | 24.1943   | 15.7112    | 1         |
| cg07158339                          | FXN;FXN;FXN                   | 0.00081873        | 0.000818731          | 0.303091           | -3.29934                     | T down vs N                            | 16.894  | 13.3465   | 12.64      | 1         |
| cg07159802                          | OR1C1                         | 0.00041576        | 0.000415761          | 0.183552           | -5.44805                     | T down vs N                            | 19.671  | 26.9174   | 21.8943    | 1         |
| cg07160746                          | KCNS1                         | 1.60E-05          | 1.60E-05             | 15.2954            | 15.2954                      | T up vs N                              | 36.952  | 69.6801   | 30.1715    | 1         |
| cg07160932                          | SEZ6L2;SEZ6L2;SEZ6L2;SEZ6L2   | 0.00079766        | 0.000797659          | 9.37523            | 9.37523                      | T up vs N                              | 16.997  | 46.9147   | 44.1635    | 1         |
| cg07161166                          | PRKACB;PRKACB                 | 0.0053578         | 0.0053578            | 6.21191            | 6.21191                      | T up vs N                              | 15.801  | 13.8868   | 6.15207    | 1         |
| cg07161429                          | CHST11                        | 0.00055463        | 0.000554633          | 0.236861           | -4.22189                     | T down vs N                            | 18.46   | 19.4293   | 16.8398    | 1         |
| cg07162000                          | ADARB2                        | 8.62E-05          | 8.62E-05             | 0.056778           | -17.6125                     | T down vs N                            | 27.123  | 77.0733   | 45.4657    | 1         |
| cg07163475                          | DDX21                         | 2.14E-05          | 2.14E-05             | 0.161041           | -6.20962                     | T down vs N                            | 35.093  | 31.2327   | 14.24      | 1         |
| cg07163991                          | MYO7B                         | 0.00070202        | 0.000702018          | 0.112444           | -8.89329                     | T down vs N                            | 17.503  | 44.7283   | 40.8866    | 1         |
| cg07164722                          | NLRP3;NLRP3;NLRP3;NLRP3;NLRP3 | 0.00211159        | 0.00211159           | 0.30622            | -3.26563                     | T down vs N                            | 13.399  | 13.1179   | 15.6644    | 1         |
| cg07165066                          | SACS                          | 1.18E-05          | 1.18E-05             | 0.20824            | -4.80214                     | T down vs N                            | 38.923  | 23.0591   | 9.47892    | 1         |
| cg07166266                          | SRP68                         | 5.71E-05          | 5.71E-05             | 0.261578           | -3.82295                     | T down vs N                            | 29.34   | 16.8436   | 9.18534    | 1         |
| cg07167423                          | TFAP2E                        | 0.00048463        | 0.000484627          | 3.16418            | 3.16418                      | T up vs N                              | 19.022  | 12.4276   | 10.4535    | 1         |
| cg07167933                          | SFTPB;SFTPB                   | 1.26E-06          | 1.26E-06             | 0.26235            | -3.8117                      | T down vs N                            | 56.309  | 16.7696   | 4.76502    | 1         |
| cg07168142                          | HSPB9;KAT2A                   | 4.82E-05          | 4.82E-05             | 8.49265            | 8.49265                      | T up vs N                              | 30.276  | 42.8612   | 22.6511    | 1         |
| TCF7L2;TCF7L2;TCF7L2;TCF7L2;TCF7L2  |                               |                   |                      |                    |                              |                                        |         |           |            |           |
| cg07168930                          | ;TCF7L2                       | 0.00564671        | 0.00564671           | 0.330998           | -3.02117                     | T down vs N                            | 10.203  | 11.4496   | 17.9557    | 1         |
| cg07169660                          | LOC100130581;LOC100130581     | 4.05E-08          | 4.05E-08             | 0.128101           | -7.80632                     | T down vs N                            | 94.552  | 39.551    | 6.69275    | 1         |
| cg07170641                          | MS4A6A;MS4A6A;MS4A6A          | 0.00215141        | 0.00215141           | 0.316779           | -3.15677                     | T down vs N                            | 13.334  | 12.377    | 14.8515    | 1         |
| cg07170752                          | DNAH14                        | 0.00046906        | 0.000469064          | 0.299672           | -3.33698                     | T down vs N                            | 19.159  | 13.6014   | 11.3589    | 1         |
| cg07172242                          | JPH3                          | 0.00540054        | 0.00540054           | 0.320103           | -3.12399                     | T down vs N                            | 10.339  | 12.1533   | 18.8086    | 1         |
| cg07173760                          | CLC                           | 0.00048888        | 0.000488875          | 0.258001           | -3.87596                     | T down vs N                            | 18.985  | 17.1912   | 14.4883    | 1         |
| cg07173972                          | SLC17A9                       | 0.00115459        | 0.00115459           | 4.96245            | 4.96245                      | T up vs N                              | 15.576  | 24.0344   | 24.6885    | 1         |
| cg07177379                          | ATP1A2                        | 0.00310041        | 0.00310041           | 0.290134           | -3.44669                     | T down vs N                            | 12.101  | 14.3414   | 18.9625    | 1         |
| cg07177852                          | CCDC68;CCDC68                 | 2.73E-05          | 2.73E-05             | 8.26139            | 8.26139                      | T up vs N                              | 33.593  | 41.7621   | 19.891     | 1         |
| cg07178825                          | TP73;TP73;TP73;TP73           | 7.66E-05          | 7.66E-05             | 3.77604            | 3.77604                      | T up vs N                              | 27.751  | 16.5348   | 9.53341    | 1         |
| cg07178864                          | NFASC;NFASC;NFASC;NFASC       | 6.06E-06          | 6.06E-06             | 0.295581           | -3.38316                     | T down vs N                            | 43.619  | 13.9134   | 5.1036     | 1         |
| cg07180212                          | SNORD1A                       | 0.00091242        | 0.000912423          | 0.312587           | -3.19911                     | T down vs N                            | 16.473  | 12.6656   | 12.3023    | 1         |
| cg07180458                          | AKR7L;AKR7L                   | 0.00713149        | 0.00713149           | 3.17447            | 3.17447                      | T up vs N                              | 9.5039  | 12.4977   | 21.0401    | 1         |
| cg07181406                          | CAPN2;CAPN2                   | 0.0066029         | 0.0066029            | 5.3213             | 5.3213                       | T up vs N                              | 9.732   | 26.175    | 43.0334    | 1         |
| cg07182669                          | SERPINB9;SERPINB9             | 1.58E-05          | 1.58E-05             | 28.0427            | 28.0427                      | T up vs N                              | 37      | 104.093   | 45.0131    | 1         |
| cg07184316                          | FCRL3                         | 7.29E-06          | 7.29E-06             | 0.253402           | -3.9463                      | T down vs N                            | 42.284  | 17.6507   | 6.67897    | 1         |
| RPS24;RPS24;RPS24;RPS24;RPS24;RPS24 |                               |                   |                      |                    |                              |                                        |         |           |            |           |
| cg07185287                          | 24                            | 6.98E-06          | 6.98E-06             | 0.275232           | -3.63329                     | T down vs N                            | 42.59   | 15.5896   | 5.85669    | 1         |
| cg07189401                          | LOC100126784;NAV2;NAV2;NAV2   | 0.00088634        | 0.000886335          | 0.299829           | -3.33523                     | T down vs N                            | 16.585  | 13.5896   | 13.1104    | 1         |
| cg07189962                          | ESR1;ESR1                     | 0.00611179        | 0.00611179           | 0.321856           | -3.10698                     | T down vs N                            | 9.9632  | 12.037    | 19.3303    | 1         |
| cg07195224                          | AIM2                          | 0.0001223         | 0.000122302          | 0.285482           | -3.50284                     | T down vs N                            | 25.337  | 14.7185   | 9.29449    | 1         |
| cg07196761                          | CHCHD8;PAAF1                  | 0.00011474        | 0.000114736          | 0.285089           | -3.50767                     | T down vs N                            | 25.658  | 14.7508   | 9.19853    | 1         |
| cg07197326                          | WDR25;WDR25                   | 1.09E-05          | 1.09E-05             | 0.272681           | -3.66729                     | T down vs N                            | 39.465  | 15.8155   | 6.4119     | 1         |
| cg07198345                          | HEPH1;HEPH1;HEPH1             | 0.00039366        | 0.000393664          | 0.164692           | -6.07194                     | T down vs N                            | 19.905  | 30.4705   | 24.4924    | 1         |
| cg07200616                          | B3GNTL1                       | 2.50E-07          | 2.50E-07             | 0.112897           | -8.85764                     | T down vs N                            | 72.268  | 44.564    | 9.86636    | 1         |
| cg07201739                          | NCRNA00171                    | 0.00031007        | 0.00031007           | 0.155245           | -6.44144                     | T down vs N                            | 20.95   | 32.4991   | 24.8209    | 1         |
| cg07203886                          | ZFHX3;ZFHX3                   | 0.00028015        | 0.000280147          | 0.2687             | -3.72162                     | T down vs N                            | 21.403  | 16.1755   | 12.092     | 1         |
| cg07205627                          | BHLHE22;BHLHE22               | 1.53E-06          | 1.53E-06             | 0.121336           | -8.24161                     | T down vs N                            | 54.589  | 41.6673   | 12.2126    | 1         |
| cg07208691                          | CUX2                          | 0.00055081        | 0.000550809          | 0.268784           | -3.72045                     | T down vs N                            | 18.489  | 16.1678   | 13.9913    | 1         |
| cg07208891                          | KLHDC4                        | 0.00149245        | 0.00149245           | 0.31471            | -3.17753                     | T down vs N                            | 14.629  | 12.5186   | 13.6914    | 1         |
| cg07209624                          | PRPF18                        | 5.18E-05          | 5.18E-05             | 0.208361           | -4.79936                     | T down vs N                            | 29.874  | 23.042    | 12.341     | 1         |

| Probeset ID | UCSC_REFGENE_NAME                                               | p-value<br>(Type) | p-value (T vs.<br>N) | Ratio (T<br>vs. N) | Fold-<br>Change (T<br>vs. N) | Fold-Change (T vs.<br>N) (Description) | F(Type) | SS (Type) | SS (Error) | F (Error) |
|-------------|-----------------------------------------------------------------|-------------------|----------------------|--------------------|------------------------------|----------------------------------------|---------|-----------|------------|-----------|
| cg07210669  | S100P                                                           | 0.00015804        | 0.000158039          | 0.239413           | -4.17688                     | T down vs N                            | 24.076  | 19.1412   | 12.7207    | 1         |
| cg07212541  | ALDH1A3                                                         | 0.00191573        | 0.00191573           | 0.296511           | -3.37255                     | T down vs N                            | 13.738  | 13.8418   | 16.1204    | 1         |
| cg07215504  | ZNF469                                                          | 0.00012239        | 0.000122387          | 5.86169            | 5.86169                      | T up vs N                              | 25.334  | 29.2915   | 18.4997    | 1         |
|             | PCDHA6;PCDHA2;PCDHA1;PCDHA7;PC<br>DHA1;PCDHA6;PCDHA5;PCDHA3;PCD |                   |                      |                    |                              |                                        |         |           |            |           |
| cg07215693  | HA4;PCDHA7                                                      | 0.00051351        | 0.000513511          | 4.51413            | 4.51413                      | T up vs N                              | 18.78   | 21.277    | 18.1278    | 1         |
| cg07217293  | TECTA                                                           | 0.00140916        | 0.00140916           | 0.310217           | -3.22355                     | T down vs N                            | 14.839  | 12.8319   | 13.8364    | 1         |
| cg07219303  | ADH6;ADH6                                                       | 0.00073278        | 0.000732783          | 0.246301           | -4.06007                     | T down vs N                            | 17.332  | 18.3892   | 16.9756    | 1         |
| cg07219314  | ZDHH8C8P                                                        | 0.00129269        | 0.00129269           | 3.30319            | 3.30319                      | T up vs N                              | 15.156  | 13.3726   | 14.1178    | 1         |
| cg07220448  | SOSTDC1                                                         | 0.00181596        | 0.00181596           | 0.323149           | -3.09455                     | T down vs N                            | 13.927  | 11.9521   | 13.7313    | 1         |
| cg07222502  | CDH15                                                           | 1.09E-05          | 1.09E-05             | 0.209687           | -4.76901                     | T down vs N                            | 39.478  | 22.8561   | 9.26339    | 1         |
| cg07225966  | CYP26C1                                                         | 0.00024335        | 0.00024335           | 4.6886             | 4.6886                       | T up vs N                              | 22.043  | 22.3611   | 16.2312    | 1         |
| cg07227926  | TXNRD1                                                          | 0.00034877        | 0.000348768          | 8.15105            | 8.15105                      | T up vs N                              | 20.431  | 41.2319   | 32.2896    | 1         |
| cg07230999  | ST7;ST7                                                         | 0.0005052         | 0.000505203          | 0.296885           | -3.36831                     | T down vs N                            | 18.848  | 13.8131   | 11.7262    | 1         |
|             | PCDHGA4;PCDHGA6;PCDHGA9;PCDHG<br>A1;PCDHGA8;PCDHGA5;PCDHGB1;PC  |                   |                      |                    |                              |                                        |         |           |            |           |
| cg07231479  | DHGA10;PCDHGB4;PCDHGA3;PCDHGA                                   | 9.84E-05          | 9.84E-05             | 3.94248            | 3.94248                      | T up vs N                              | 26.442  | 17.6258   | 10.6654    | 1         |
| cg07232095  | TMEM201;TMEM201                                                 | 0.00017443        | 0.000174432          | 0.316508           | -3.15948                     | T down vs N                            | 23.601  | 12.3955   | 8.40337    | 1         |
| cg07234639  | WIPF3                                                           | 0.002742          | 0.002742             | 0.288842           | -3.4621                      | T down vs N                            | 12.509  | 14.445    | 18.4765    | 1         |
| cg07239938  | ELANE                                                           | 1.74E-05          | 1.74E-05             | 0.251164           | -3.98146                     | T down vs N                            | 36.394  | 17.8796   | 7.86041    | 1         |
| cg07243147  | ACCN3;ACCN3;ABCB8;ACCN3                                         | 4.20E-05          | 4.20E-05             | 0.33156            | -3.01604                     | T down vs N                            | 31.059  | 11.4145   | 5.88026    | 1         |
| cg07244098  | TRIM21                                                          | 4.10E-05          | 4.10E-05             | 0.255918           | -3.90751                     | T down vs N                            | 31.193  | 17.3976   | 8.92382    | 1         |
| cg07247610  | SLC2A5;SLC2A5                                                   | 5.61E-05          | 5.61E-05             | 0.229412           | -4.35897                     | T down vs N                            | 29.435  | 20.301    | 11.0351    | 1         |
| cg07247998  | TACC2;TACC2                                                     | 0.00032053        | 0.000320526          | 3.31311            | 3.31311                      | T up vs N                              | 20.803  | 13.4398   | 10.3371    | 1         |
| cg07248455  | PAQR5                                                           | 0.00081381        | 0.000813805          | 4.67021            | 4.67021                      | T up vs N                              | 16.918  | 22.2476   | 21.0404    | 1         |
| cg07249274  | MCC;MCC                                                         | 0.00315004        | 0.00315004           | 0.218331           | -4.58021                     | T down vs N                            | 12.049  | 21.6893   | 28.8025    | 1         |
| cg07249730  | MSI2;MSI2                                                       | 9.19E-06          | 9.19E-06             | 0.17632            | -5.67152                     | T down vs N                            | 40.652  | 28.2091   | 11.1028    | 1         |
| cg07249742  | ITGB5                                                           | 2.03E-05          | 2.03E-05             | 0.249419           | -4.00932                     | T down vs N                            | 35.435  | 18.0605   | 8.15491    | 1         |
| cg07250128  | C3orf21                                                         | 0.0014029         | 0.0014029            | 0.316643           | -3.15814                     | T down vs N                            | 14.855  | 12.3864   | 13.3413    | 1         |
| cg07250758  | VWCE                                                            | 9.86E-05          | 9.86E-05             | 3.98964            | 3.98964                      | T up vs N                              | 26.429  | 17.9327   | 10.8566    | 1         |
| cg07251788  | CLTCL1;CLTCL1                                                   | 4.63E-05          | 4.63E-05             | 0.146295           | -6.83552                     | T down vs N                            | 30.502  | 34.6042   | 18.1517    | 1         |
| cg07252308  | HRNR                                                            | 0.00320645        | 0.00320645           | 0.273081           | -3.66191                     | T down vs N                            | 11.99   | 15.7798   | 21.0568    | 1         |
| cg07252363  | KIFC1                                                           | 1.08E-05          | 1.08E-05             | 0.261137           | -3.82941                     | T down vs N                            | 39.529  | 16.886    | 6.83495    | 1         |
| cg07253432  | PFKM                                                            | 4.47E-07          | 4.47E-07             | 0.104956           | -9.52784                     | T down vs N                            | 66.164  | 47.5941   | 11.5095    | 1         |
| cg07254413  | MS4A6A;MS4A6A;MS4A6A                                            | 0.00036182        | 0.000361821          | 0.193485           | -5.16836                     | T down vs N                            | 20.271  | 25.2698   | 19.9459    | 1         |
| cg07254421  | SLC1A3;SLC1A3                                                   | 0.00091071        | 0.000910713          | 0.251866           | -3.97037                     | T down vs N                            | 16.48   | 17.8074   | 17.2891    | 1         |
| cg07258300  | CYP27C1                                                         | 0.002378          | 0.002378             | 0.187015           | -5.34715                     | T down vs N                            | 12.99   | 26.327    | 32.4267    | 1         |
| cg07260062  | ALG5;ALG5                                                       | 0.0005299         | 0.000529898          | 0.272571           | -3.66877                     | T down vs N                            | 18.649  | 15.8253   | 13.5774    | 1         |
| cg07261186  | ZMIZ1                                                           | 6.79E-05          | 6.79E-05             | 5.89255            | 5.89255                      | T up vs N                              | 28.391  | 29.4657   | 16.6059    | 1         |
| cg07262168  | RNF150                                                          | 6.98E-05          | 6.98E-05             | 0.303163           | -3.29856                     | T down vs N                            | 28.248  | 13.3412   | 7.55676    | 1         |
| cg07263562  | CCNA2                                                           | 0.00011705        | 0.00011705           | 0.280731           | -3.56213                     | T down vs N                            | 25.557  | 15.1152   | 9.46285    | 1         |
| cg07263981  | OTOF                                                            | 0.00357261        | 0.00357261           | 3.59233            | 3.59233                      | T up vs N                              | 11.638  | 15.3168   | 21.0573    | 1         |
| cg07264679  | CD163;CD163                                                     | 2.79E-08          | 2.79E-08             | 0.123653           | -8.08715                     | T down vs N                            | 99.774  | 40.9231   | 6.56252    | 1         |
| cg07265444  | PION                                                            | 6.35E-05          | 6.35E-05             | 0.32498            | -3.07711                     | T down vs N                            | 28.752  | 11.8328   | 6.58478    | 1         |
| cg07267294  | PDE4D;PDE4D                                                     | 1.23E-07          | 1.23E-07             | 0.216241           | -4.62447                     | T down vs N                            | 80.331  | 21.9643   | 4.37475    | 1         |
|             | CACNA1C;CACNA1C;CACNA1C;CACNA<br>1C;CACNA1C;CACNA1C;CACNA1C;CAC |                   |                      |                    |                              |                                        |         |           |            |           |
| cg07267600  | NA1C;CACNA1C;CACNA1C;CACNA1C                                    | 0.00448357        | 0.00448357           | 0.317228           | -3.1523                      | T down vs N                            | 10.915  | 12.3466   | 18.0987    | 1         |
| cg07268734  | MPP7                                                            | 6.02E-06          | 6.02E-06             | 0.142019           | -7.0413                      | T down vs N                            | 43.66   | 35.6803   | 13.0758    | 1         |
| cg07270259  | PARD3                                                           | 4.80E-06          | 4.80E-06             | 0.213609           | -4.68146                     | T down vs N                            | 45.348  | 22.317    | 7.87408    | 1         |
| cg07272566  | NAE1;NAE1;NAE1                                                  | 4.16E-06          | 4.16E-06             | 0.309719           | -3.22873                     | T down vs N                            | 46.429  | 12.8672   | 4.43416    | 1         |
| cg07272929  | PVT1                                                            | 3.22E-05          | 3.22E-05             | 0.241095           | -4.14775                     | T down vs N                            | 32.601  | 18.9542   | 9.30234    | 1         |
| cg07274922  | PAGE2B                                                          | 0.00468866        | 0.00468866           | 0.316354           | -3.16101                     | T down vs N                            | 10.775  | 12.406    | 18.4218    | 1         |
| cg07277633  | ATP2C2                                                          | 1.01E-05          | 1.01E-05             | 10.6804            | 10.6804                      | T up vs N                              | 42.214  | 49.4479   | 17.5703    | 1         |
| cg07277864  | SRCIN1                                                          | 1.16E-05          | 1.16E-05             | 3.81659            | 3.81659                      | T up vs N                              | 39.087  | 16.8017   | 6.87777    | 1         |
| cg07280593  | LILRA2;LILRA2;LILRA2;LILRA2                                     | 3.16E-05          | 3.16E-05             | 0.192307           | -5.20003                     | T down vs N                            | 32.721  | 25.4581   | 12.4485    | 1         |
| cg07280985  | GP6;GP6                                                         | 0.00210169        | 0.00210169           | 0.2791             | -3.58295                     | T down vs N                            | 13.415  | 15.2542   | 18.1934    | 1         |
| cg07283804  | SERGEF                                                          | 3.28E-05          | 3.28E-05             | 0.310206           | -3.22366                     | T down vs N                            | 32.501  | 12.8327   | 6.31749    | 1         |
| cg07285213  | TERT;TERT                                                       | 2.02E-05          | 2.02E-05             | 0.27766            | -3.60152                     | T down vs N                            | 35.462  | 15.3781   | 6.93849    | 1         |
| cg07285764  | GRASP                                                           | 1.23E-05          | 1.23E-05             | 8.24429            | 8.24429                      | T up vs N                              | 38.677  | 41.6802   | 17.2424    | 1         |
| cg07286123  | CD93                                                            | 2.94E-06          | 2.94E-06             | 0.144774           | -6.90732                     | T down vs N                            | 49.155  | 34.9814   | 11.3865    | 1         |
| cg07286681  | NSD1;NSD1                                                       | 0.00049449        | 0.000494486          | 0.286133           | -3.49488                     | T down vs N                            | 18.937  | 14.6651   | 12.3905    | 1         |
| cg07291100  | CLSTN2                                                          | 0.00070304        | 0.000703037          | 0.211025           | -4.73877                     | T down vs N                            | 17.498  | 22.6702   | 20.7299    | 1         |
| cg07293445  | KCP;KCP                                                         | 2.54E-05          | 2.54E-05             | 25.8619            | 25.8619                      | T up vs N                              | 34.025  | 99.0987   | 46.6006    | 1         |
| cg07294774  | DIO2;DIO2;DIO2                                                  | 0.00011648        | 0.000116477          | 0.291898           | -3.42586                     | T down vs N                            | 25.582  | 14.2012   | 8.88205    | 1         |
| cg07297178  | CEACAM7                                                         | 0.00014337        | 0.000143365          | 0.230942           | -4.33009                     | T down vs N                            | 24.55   | 20.118    | 13.1113    | 1         |
| cg07300610  | ZNF688;ZNF688                                                   | 0.00021355        | 0.000213552          | 0.280206           | -3.56881                     | T down vs N                            | 22.646  | 15.1598   | 10.7108    | 1         |
| cg07302677  | KCP;KCP                                                         | 0.00362313        | 0.00362313           | 3.59227            | 3.59227                      | T up vs N                              | 11.593  | 15.3164   | 21.1392    | 1         |
| cg07303450  | DOC2A                                                           | 7.59E-05          | 7.59E-05             | 4.72883            | 4.72883                      | T up vs N                              | 27.798  | 22.6091   | 13.0133    | 1         |
| cg07303912  | LRRN4                                                           | 9.16E-05          | 9.16E-05             | 19.7605            | 19.7605                      | T up vs N                              | 26.811  | 83.3811   | 49.7598    | 1         |

| Probeset ID | UCSC_REFGENE_NAME             | p-value<br>(Type) | p-value (T vs.<br>N) | Ratio (T<br>vs. N) | Fold-<br>Change (T<br>vs. N) | Fold-Change (T vs.<br>N) (Description) | F(Type) | SS (Type) | SS (Error) | F (Error) |
|-------------|-------------------------------|-------------------|----------------------|--------------------|------------------------------|----------------------------------------|---------|-----------|------------|-----------|
| cg07304175  | SOX2OT                        | 0.00014139        | 0.000141387          | 5.11232            | 5.11232                      | T up vs N                              | 24.619  | 24.9355   | 16.206     | 1         |
| cg07305049  | THAP7;THAP7                   | 0.00041686        | 0.000416857          | 0.316139           | -3.16317                     | T down vs N                            | 19.66   | 12.4207   | 10.1086    | 1         |
| cg07307388  | CMAH;CMAH                     | 9.24E-05          | 9.24E-05             | 0.213801           | -4.67725                     | T down vs N                            | 26.762  | 22.2911   | 13.3271    | 1         |
| cg07309576  | ORS111                        | 2.45E-05          | 2.45E-05             | 0.186664           | -5.35723                     | T down vs N                            | 34.266  | 26.3862   | 12.3207    | 1         |
| cg07310406  | MLC1;MLC1                     | 0.00011832        | 0.000118319          | 0.28288            | -3.53507                     | T down vs N                            | 25.503  | 14.9343   | 9.36943    | 1         |
| cg07311521  | EGFR;EGFR;EGFR;EGFR           | 0.00547777        | 0.00547777           | 0.233704           | -4.27893                     | T down vs N                            | 10.507  | 18.6287   | 26.5938    | 1         |
| cg07312601  | MRT04                         | 0.00121959        | 0.00121959           | 0.310054           | -3.22524                     | T down vs N                            | 15.371  | 12.8434   | 13.3687    | 1         |
| cg07313373  | NLRP3;NLRP3                   | 0.00058286        | 0.000582857          | 0.297413           | -3.36232                     | T down vs N                            | 18.256  | 13.7727   | 12.0705    | 1         |
| cg07314983  | CD53;CD53                     | 2.63E-06          | 2.63E-06             | 0.200011           | -4.99974                     | T down vs N                            | 50.039  | 24.2595   | 7.75702    | 1         |
| cg07315969  | MICB                          | 0.00046134        | 0.000461344          | 0.26114            | -3.82936                     | T down vs N                            | 19.229  | 16.8857   | 14.0504    | 1         |
| cg07318313  | ENG;ENG                       | 7.45E-05          | 7.45E-05             | 0.200637           | -4.98414                     | T down vs N                            | 27.892  | 24.1654   | 13.8621    | 1         |
| cg07319143  | SYPL2                         | 0.00011236        | 0.000112356          | 0.276069           | -3.62228                     | T down vs N                            | 25.764  | 15.5163   | 9.63614    | 1         |
| cg07319528  | GIMAP5;GIMAP5                 | 0.00024734        | 0.000247343          | 0.307321           | -3.25392                     | T down vs N                            | 21.968  | 13.0384   | 9.4962     | 1         |
| cg07321467  | BMP3                          | 3.13E-06          | 3.13E-06             | 0.197573           | -5.06143                     | T down vs N                            | 48.64   | 24.6306   | 8.10224    | 1         |
| cg07321730  | TBC1D9B;TBC1D9B               | 0.00530322        | 0.00530322           | 0.26926            | -3.71388                     | T down vs N                            | 10.394  | 16.1243   | 24.8205    | 1         |
| cg07322909  | ORS5D13                       | 1.94E-05          | 1.94E-05             | 0.294518           | -3.39538                     | T down vs N                            | 35.703  | 13.9958   | 6.27212    | 1         |
| cg07323141  | LOC151174;LOC643387;LOC151174 | 4.84E-05          | 4.84E-05             | 18.7881            | 18.7881                      | T up vs N                              | 30.259  | 80.5846   | 42.611     | 1         |
| cg07324045  | FAM47B                        | 0.00020526        | 0.000205256          | 0.170583           | -5.86225                     | T down vs N                            | 22.831  | 29.2946   | 20.5296    | 1         |
| cg07324546  | C6orf10                       | 0.00031823        | 0.000318231          | 0.217117           | -4.6058                      | T down vs N                            | 20.834  | 21.8484   | 16.7788    | 1         |
| cg07325233  | IL10RB                        | 0.00480117        | 0.00480117           | 0.32808            | -3.04804                     | T down vs N                            | 10.701  | 11.6338   | 17.3943    | 1         |
| cg07327405  | LOC146880                     | 1.15E-05          | 1.15E-05             | 0.332493           | -3.00758                     | T down vs N                            | 39.109  | 11.3565   | 4.64609    | 1         |
| cg07329131  | TEX14;RAD51C;TEX14;RAD51C     | 0.00012773        | 0.000127731          | 0.195952           | -5.1033                      | T down vs N                            | 25.121  | 24.8815   | 15.8478    | 1         |
| cg07330171  | RNLS                          | 8.94E-07          | 8.94E-07             | 0.253768           | -3.94061                     | T down vs N                            | 63.615  | 16.5775   | 3.90888    | 1         |
| cg07330196  | LCE1A                         | 5.28E-06          | 5.28E-06             | 0.224008           | -4.46413                     | T down vs N                            | 44.634  | 20.9637   | 7.51495    | 1         |
| cg07330481  | ARL5C;ARL5C                   | 0.00028932        | 0.00028932           | 5.48816            | 5.48816                      | T up vs N                              | 21.259  | 27.1509   | 20.4348    | 1         |
| cg07336123  | PLCE1;PLCE1                   | 0.00051148        | 0.000511482          | 0.298394           | -3.35128                     | T down vs N                            | 18.796  | 13.6981   | 11.6604    | 1         |
| cg07339236  | ATP9A                         | 3.61E-05          | 3.61E-05             | 0.238293           | -4.19652                     | T down vs N                            | 31.943  | 19.267    | 9.65072    | 1         |
| cg07340007  | STK24;STK24                   | 1.95E-05          | 1.95E-05             | 0.157511           | -6.34877                     | T down vs N                            | 35.677  | 31.9954   | 14.3488    | 1         |
| cg07340580  | SLC26A4;LOC286002;SLC26A4     | 0.0003858         | 0.000385803          | 5.30576            | 5.30576                      | T up vs N                              | 19.992  | 26.0836   | 20.8749    | 1         |
| cg07341624  | TMC2                          | 0.00273246        | 0.00273246           | 3.73406            | 3.73406                      | T up vs N                              | 12.521  | 16.2577   | 20.7758    | 1         |
| cg07347092  | DNAH10                        | 0.00077075        | 0.000770745          | 3.9496             | 3.9496                       | T up vs N                              | 17.132  | 17.6722   | 16.5045    | 1         |
| cg07350057  | GGT1                          | 0.00010593        | 0.000105925          | 0.308287           | -3.24373                     | T down vs N                            | 26.063  | 12.9691   | 7.96183    | 1         |
| cg07350590  | RFX4                          | 2.89E-05          | 2.89E-05             | 0.286645           | -3.48863                     | T down vs N                            | 33.252  | 14.6232   | 7.03633    | 1         |
| cg07350919  | SLIT3                         | 2.89E-05          | 2.89E-05             | 0.196634           | -5.0856                      | T down vs N                            | 33.255  | 24.7755   | 11.9201    | 1         |
| cg07353306  | TAP2;TAP2                     | 0.00156822        | 0.00156822           | 0.296446           | -3.37329                     | T down vs N                            | 14.45   | 13.8468   | 15.3317    | 1         |
| cg07353583  | SV2C                          | 2.32E-05          | 2.32E-05             | 0.242945           | -4.11616                     | T down vs N                            | 34.585  | 18.7511   | 8.67478    | 1         |
| cg07355688  | BARX2                         | 2.48E-05          | 2.48E-05             | 0.332804           | -3.00477                     | T down vs N                            | 34.19   | 11.3372   | 5.30555    | 1         |
| cg07356011  | TCEA3                         | 8.36E-06          | 8.36E-06             | 14.4874            | 14.4874                      | T up vs N                              | 41.309  | 66.9346   | 25.9253    | 1         |
| cg07356412  | XKR6                          | 0.00034189        | 0.000341887          | 3.14957            | 3.14957                      | T up vs N                              | 20.518  | 12.3279   | 9.6132     | 1         |
| cg07357314  | MS4A10                        | 4.05E-05          | 4.05E-05             | 0.177064           | -5.64768                     | T down vs N                            | 31.271  | 28.0723   | 14.3634    | 1         |
| cg07359518  | EP400                         | 0.00047464        | 0.000474642          | 0.268558           | -3.72359                     | T down vs N                            | 19.109  | 16.1885   | 13.5547    | 1         |
| cg07359633  | LTK;LTk;LTk                   | 0.0046292         | 0.0046292            | 3.51906            | 3.51906                      | T up vs N                              | 10.815  | 14.8271   | 21.9359    | 1         |
| cg07360792  | PRDM6                         | 0.00513043        | 0.00513043           | 3.53365            | 3.53365                      | T up vs N                              | 10.496  | 14.9248   | 22.7512    | 1         |
| cg07361154  | IGDCC4                        | 1.80E-05          | 1.80E-05             | 0.247416           | -4.04177                     | T down vs N                            | 36.168  | 18.2708   | 8.08274    | 1         |
| cg07362328  | DMRTA2                        | 0.00044688        | 0.000446876          | 0.271326           | -3.6856                      | T down vs N                            | 19.364  | 15.9369   | 13.1687    | 1         |
| cg07362537  | VPS52;RPS18                   | 0.00046919        | 0.000469194          | 0.227428           | -4.397                       | T down vs N                            | 19.158  | 20.5412   | 17.1556    | 1         |
| cg07366670  | CUX2                          | 9.66E-05          | 9.66E-05             | 0.247487           | -4.04061                     | T down vs N                            | 26.533  | 18.2633   | 11.0133    | 1         |
| cg07367113  | BRD9;BRD9;BRD9                | 8.59E-05          | 8.59E-05             | 0.159199           | -6.28145                     | T down vs N                            | 27.144  | 31.6274   | 18.6429    | 1         |
| cg07368857  | FOXP1;FOXP1                   | 6.46E-08          | 6.46E-08             | 0.079961           | -12.5061                     | T down vs N                            | 88.347  | 59.7726   | 10.8251    | 1         |
| cg07371589  | SEMA6C                        | 0.0017441         | 0.0017441            | 4.18215            | 4.18215                      | T up vs N                              | 14.07   | 19.175    | 21.8054    | 1         |
| cg07372195  | ABCA5;ABCA5;ABCA5             | 1.17E-05          | 1.17E-05             | 0.232467           | -4.30169                     | T down vs N                            | 38.994  | 19.9378   | 8.18088    | 1         |
| cg07374224  | TMPRSS3;TMPRSS3;TMPRSS3       | 0.00012671        | 0.000126713          | 0.325061           | -3.07635                     | T down vs N                            | 25.16   | 11.8276   | 7.52144    | 1         |
| cg07375150  | P2RY13;MED12L                 | 4.40E-06          | 4.40E-06             | 0.136332           | -7.33502                     | T down vs N                            | 45.998  | 37.1902   | 12.9364    | 1         |
| cg07376029  | GC                            | 0.00027454        | 0.000274542          | 0.293181           | -3.41086                     | T down vs N                            | 21.494  | 14.1002   | 10.496     | 1         |
| cg07376033  | MICA                          | 0.00031182        | 0.000311815          | 0.225799           | -4.42871                     | T down vs N                            | 20.925  | 20.7411   | 15.8596    | 1         |
| cg07376232  | AMICA1;AMICA1                 | 0.00564491        | 0.00564491           | 0.328507           | -3.04407                     | T down vs N                            | 10.204  | 11.6066   | 18.2001    | 1         |
| cg07377172  | TNXB                          | 5.50E-06          | 5.50E-06             | 0.331784           | -3.01401                     | T down vs N                            | 44.334  | 11.4006   | 4.11439    | 1         |
| cg07378350  | GDF5                          | 0.00013037        | 0.000130366          | 0.333161           | -3.00155                     | T down vs N                            | 25.019  | 11.3151   | 7.23616    | 1         |
| cg07378762  | MECOM                         | 0.00493031        | 0.00493031           | 5.21145            | 5.21145                      | T up vs N                              | 10.619  | 25.5259   | 38.4611    | 1         |
| cg07382039  | OBSCN;OBSCN                   | 0.00037904        | 0.000379039          | 0.318094           | -3.14372                     | T down vs N                            | 20.069  | 12.288    | 9.79674    | 1         |
| cg07382347  | RNF39;RNF39                   | 0.00060714        | 0.000607136          | 4.69036            | 4.69036                      | T up vs N                              | 18.09   | 22.372    | 19.7877    | 1         |
| cg07384894  | PIWIL1                        | 5.24E-05          | 5.24E-05             | 0.265945           | -3.76018                     | T down vs N                            | 29.807  | 16.4302   | 8.81947    | 1         |
| cg07388018  | CCR7                          | 7.34E-06          | 7.34E-06             | 0.245456           | -4.07406                     | T down vs N                            | 42.232  | 18.4795   | 7.00116    | 1         |
| cg07389810  | OR13A1                        | 1.16E-05          | 1.16E-05             | 0.325219           | -3.07485                     | T down vs N                            | 39.046  | 11.8173   | 4.84237    | 1         |
| cg07390647  | ST3GAL6                       | 0.00011065        | 0.000110653          | 0.164782           | -6.06861                     | T down vs N                            | 25.841  | 30.452    | 18.8551    | 1         |
| cg07391831  | ALOX12P2                      | 5.54E-05          | 5.54E-05             | 5.19609            | 5.19609                      | T up vs N                              | 29.499  | 25.4347   | 13.7955    | 1         |
| cg07392358  | SLC6A3                        | 6.47E-06          | 6.47E-06             | 0.148712           | -6.7244                      | T down vs N                            | 43.136  | 34.0165   | 12.6174    | 1         |
| cg07392722  | BEX1                          | 0.00102752        | 0.00102752           | 0.296863           | -3.36856                     | T down vs N                            | 16.017  | 13.8149   | 13.8005    | 1         |
| cg07395763  | TNS3                          | 0.00026492        | 0.00026492           | 0.308774           | -3.23861                     | T down vs N                            | 21.656  | 12.9344   | 9.55638    | 1         |
| cg07396272  | SLCO1B3                       | 0.00010087        | 0.000100866          | 0.12172            | -8.21555                     | T down vs N                            | 26.313  | 41.5422   | 25.2607    | 1         |
| cg07396817  | IGF2BP2;IGF2BP2               | 0.00027258        | 0.000272583          | 0.215486           | -4.64066                     | T down vs N                            | 21.527  | 22.0647   | 16.3999    | 1         |

| Probeset ID                    | UCSC_REFGENE_NAME             | p-value<br>(Type) | p-value (T vs.<br>N) | Ratio (T<br>vs. N) | Fold-<br>Change (T<br>vs. N) | Fold-Change (T vs.<br>N) (Description) | F(Type) | SS (Type) | SS (Error) | F (Error) |
|--------------------------------|-------------------------------|-------------------|----------------------|--------------------|------------------------------|----------------------------------------|---------|-----------|------------|-----------|
| cg07396904                     | OR10G2                        | 0.00017277        | 0.000172774          | 0.22471            | -4.45017                     | T down vs N                            | 23.647  | 20.876    | 14.1253    | 1         |
| cg07398791                     | TNFAIP8                       | 1.19E-06          | 1.19E-06             | 0.278496           | -3.59071                     | T down vs N                            | 56.781  | 15.306    | 4.31301    | 1         |
| cg07400294                     | TNXB                          | 0.00025683        | 0.00025683           | 0.172763           | -5.78827                     | T down vs N                            | 21.797  | 28.8754   | 21.1964    | 1         |
| cg07402310                     | STAT5B                        | 0.00096627        | 0.000966273          | 0.291721           | -3.42793                     | T down vs N                            | 16.252  | 14.2152   | 13.9951    | 1         |
| cg07408232                     | TRIM40                        | 0.00210801        | 0.00210801           | 0.304037           | -3.28908                     | T down vs N                            | 13.405  | 13.277    | 15.8474    | 1         |
| cg07409200                     | C13orf30                      | 4.87E-05          | 4.87E-05             | 0.294291           | -3.39799                     | T down vs N                            | 30.218  | 14.0135   | 7.41985    | 1         |
| cg07416664                     | GALR3                         | 0.00156068        | 0.00156068           | 8.03751            | 8.03751                      | T up vs N                              | 14.468  | 40.6824   | 44.9911    | 1         |
| cg07421737                     | TCIRG1;TCIRG1                 | 0.00081341        | 0.00081341           | 0.250568           | -3.99093                     | T down vs N                            | 16.92   | 17.9411   | 16.9657    | 1         |
| cg07426848                     | S100A3;S100A3                 | 3.31E-08          | 3.31E-08             | 0.263857           | -3.78994                     | T down vs N                            | 97.34   | 16.6264   | 2.73291    | 1         |
| cg07428782                     | ACCN1                         | 2.20E-07          | 2.20E-07             | 0.207606           | -4.81683                     | T down vs N                            | 73.681  | 23.1489   | 5.02686    | 1         |
| cg07429087                     | NMUR2                         | 1.81E-06          | 1.81E-06             | 0.232855           | -4.29452                     | T down vs N                            | 53.166  | 19.8922   | 5.98643    | 1         |
| cg07429146                     | AGAP3                         | 0.00031521        | 0.000315209          | 3.31111            | 3.31111                      | T up vs N                              | 20.877  | 13.4263   | 10.29      | 1         |
| cg07429743                     | SEMA5A                        | 2.26E-05          | 2.26E-05             | 0.208389           | -4.79871                     | T down vs N                            | 34.754  | 23.0381   | 10.6062    | 1         |
| cg07437908                     | IGF2BP2;IGF2BP2               | 0.00096919        | 0.000969194          | 0.292296           | -3.42119                     | T down vs N                            | 16.24   | 14.1698   | 13.9604    | 1         |
| cg07441143                     | SLURP1                        | 8.15E-05          | 8.15E-05             | 0.326798           | -3.05999                     | T down vs N                            | 27.417  | 11.7156   | 6.83694    | 1         |
| cg07444473                     | FLJ32063                      | 0.00023343        | 0.000233432          | 0.303245           | -3.29766                     | T down vs N                            | 22.234  | 13.3352   | 9.59633    | 1         |
| cg07445246                     | TCL1A;TCL1A                   | 0.00204689        | 0.00204689           | 3.4026             | 3.4026                       | T up vs N                              | 13.507  | 14.0446   | 16.6368    | 1         |
| cg07445326                     | PAGE5;PAGE5                   | 3.22E-06          | 3.22E-06             | 0.160682           | -6.22346                     | T down vs N                            | 48.426  | 31.309    | 10.3445    | 1         |
| cg07446572                     | CDCA3                         | 1.37E-06          | 1.37E-06             | 0.219143           | -4.56324                     | T down vs N                            | 55.533  | 21.5836   | 6.2186     | 1         |
| cg07448319                     | ZNF620;ZNF620                 | 2.54E-05          | 2.54E-05             | 0.281394           | -3.55373                     | T down vs N                            | 34.043  | 15.0591   | 7.0776     | 1         |
| cg07450037                     | HOXA1;HOXA1                   | 2.29E-05          | 2.29E-05             | 13.7382            | 13.7382                      | T up vs N                              | 34.667  | 64.302    | 29.678     | 1         |
| cg07450214                     | ANKRD26                       | 0.00081098        | 0.000810981          | 0.21911            | -4.56392                     | T down vs N                            | 16.932  | 21.5879   | 20.4       | 1         |
| cg07452997                     | ANKRD58                       | 0.00080823        | 0.000808227          | 3.45455            | 3.45455                      | T up vs N                              | 16.945  | 14.3942   | 13.5915    | 1         |
| cg07455318                     | CDC88C                        | 0.0015331         | 0.0015331            | 0.278381           | -3.5922                      | T down vs N                            | 14.532  | 15.3159   | 16.863     | 1         |
| cg07456480                     | ACCN1                         | 0.00033074        | 0.000330735          | 0.261692           | -3.82129                     | T down vs N                            | 20.664  | 16.8326   | 13.0333    | 1         |
| cg07459248                     | HRNPB3                        | 4.61E-05          | 4.61E-05             | 0.247356           | -4.04275                     | T down vs N                            | 30.527  | 18.2771   | 9.57947    | 1         |
| cg07460294                     | HLA-DPB2                      | 0.00022096        | 0.000220955          | 5.24865            | 5.24865                      | T up vs N                              | 22.488  | 25.7463   | 18.3185    | 1         |
| cg07463059                     | IFI16;IFI16                   | 0.00073339        | 0.000733386          | 0.1847             | -5.41417                     | T down vs N                            | 17.329  | 26.7197   | 24.6704    | 1         |
| PCDHA2;PCDHA1;PCDHA3;PCDHA3;PC |                               |                   |                      |                    |                              |                                        |         |           |            |           |
| cg07463541                     | DHA1                          | 2.01E-05          | 2.01E-05             | 6.69228            | 6.69228                      | T up vs N                              | 35.472  | 33.8458   | 15.2664    | 1         |
| cg07464571                     | LEP                           | 8.60E-05          | 8.60E-05             | 5.77049            | 5.77049                      | T up vs N                              | 27.14   | 28.7743   | 16.9636    | 1         |
| cg07465627                     | STXBP4                        | 7.81E-05          | 7.81E-05             | 0.243972           | -4.09883                     | T down vs N                            | 27.646  | 18.6394   | 10.7876    | 1         |
| cg07468289                     | ZNRD1;NCRNA00171;ZNRD1        | 2.70E-05          | 2.70E-05             | 0.148064           | -6.75385                     | T down vs N                            | 33.664  | 34.1727   | 16.242     | 1         |
| cg07468752                     | PLEKHG1                       | 0.00160182        | 0.00160182           | 4.10775            | 4.10775                      | T up vs N                              | 14.374  | 18.6969   | 20.8118    | 1         |
| cg07469594                     | PIIB                          | 5.93E-06          | 5.93E-06             | 0.312018           | -3.20494                     | T down vs N                            | 43.776  | 12.7053   | 4.64375    | 1         |
| cg07470001                     | NXN                           | 6.18E-05          | 6.18E-05             | 0.29146            | -3.43101                     | T down vs N                            | 28.907  | 14.2359   | 7.87957    | 1         |
| cg07470314                     | DOK2                          | 5.03E-05          | 5.03E-05             | 0.218703           | -4.57241                     | T down vs N                            | 30.037  | 21.6407   | 11.5276    | 1         |
| cg07471018                     | COX7B2                        | 0.00042204        | 0.000422035          | 0.331087           | -3.02036                     | T down vs N                            | 19.607  | 11.4441   | 9.33887    | 1         |
| cg07475151                     | LOC100268168;LOC100268168     | 0.00217276        | 0.00217276           | 0.23282            | -4.29516                     | T down vs N                            | 13.3    | 19.8963   | 23.9352    | 1         |
| cg07475178                     | LDHD;LDHD                     | 0.00018838        | 0.000188376          | 0.293264           | -3.4099                      | T down vs N                            | 23.235  | 14.0937   | 9.7051     | 1         |
| cg07475954                     | HAS1                          | 7.72E-05          | 7.72E-05             | 0.213578           | -4.68212                     | T down vs N                            | 27.704  | 22.3211   | 12.891     | 1         |
| cg07476030                     | RTN4IP1;QRS1                  | 0.0002584         | 0.000258403          | 0.32307            | -3.09531                     | T down vs N                            | 21.769  | 11.9573   | 8.78858    | 1         |
| cg07476201                     | LCE3E                         | 5.81E-05          | 5.81E-05             | 0.320042           | -3.12459                     | T down vs N                            | 29.24   | 12.1574   | 6.6525     | 1         |
| cg07477867                     | TAT                           | 0.00181069        | 0.00181069           | 0.216187           | -4.62563                     | T down vs N                            | 13.937  | 21.9715   | 25.2235    | 1         |
| cg07479253                     | SLC9A10                       | 5.85E-07          | 5.85E-07             | 0.207293           | -4.8241                      | T down vs N                            | 63.477  | 23.1933   | 5.84613    | 1         |
| CCL14;CCL14;CCL14-CCL15;CCL14- |                               |                   |                      |                    |                              |                                        |         |           |            |           |
| cg07480367                     | CCL15                         | 3.36E-05          | 3.36E-05             | 0.153735           | -6.50468                     | T down vs N                            | 32.35   | 32.8409   | 16.243     | 1         |
| cg07481097                     | BOC                           | 0.00090123        | 0.000901228          | 0.322605           | -3.09976                     | T down vs N                            | 16.52   | 11.9877   | 11.6102    | 1         |
| cg07481273                     | C14orf109;C14orf109           | 0.00090567        | 0.000905673          | 0.29437            | -3.39708                     | T down vs N                            | 16.501  | 14.0074   | 13.5819    | 1         |
| cg07482916                     | KDM6B;TMEM88                  | 7.18E-05          | 7.18E-05             | 3.13532            | 3.13532                      | T up vs N                              | 28.091  | 12.2307   | 6.96644    | 1         |
| cg07483086                     | MMADHC                        | 0.00425975        | 0.00425975           | 0.298309           | -3.35223                     | T down vs N                            | 11.076  | 13.7045   | 19.797     | 1         |
| cg07484354                     | SOX30;SOX30                   | 0.00019442        | 0.000194421          | 5.35114            | 5.35114                      | T up vs N                              | 23.086  | 26.3504   | 18.2625    | 1         |
| cg07485417                     | NPM2                          | 1.54E-06          | 1.54E-06             | 8.85861            | 8.85861                      | T up vs N                              | 54.565  | 44.5685   | 13.0687    | 1         |
| cg07485775                     | NEURL1B                       | 7.98E-06          | 7.98E-06             | 4.51976            | 4.51976                      | T up vs N                              | 41.637  | 21.3122   | 8.18976    | 1         |
| cg07485916                     | RHCG                          | 1.94E-05          | 1.94E-05             | 5.71817            | 5.71817                      | T up vs N                              | 35.718  | 28.4761   | 12.7558    | 1         |
| cg07486017                     | C11orf9;C11orf9;DKFZP434K028  | 0.00283086        | 0.00283086           | 3.08153            | 3.08153                      | T up vs N                              | 12.402  | 11.863    | 15.3043    | 1         |
| cg07486100                     | CHCHD3                        | 0.00062884        | 0.000628841          | 0.252714           | -3.95705                     | T down vs N                            | 17.947  | 17.7207   | 15.7985    | 1         |
| PCDHGA4;PCDHGA11;PCDHGA11;PCD  |                               |                   |                      |                    |                              |                                        |         |           |            |           |
| HGA9;PCDHGA1;PCDHGB1;PCDHGB6;  |                               |                   |                      |                    |                              |                                        |         |           |            |           |
| cg07489502                     | PCDHGA12;PCDHGB3;PCDHGB7;PCDH | 1.56E-05          | 1.56E-05             | 20.9586            | 20.9586                      | T up vs N                              | 37.119  | 86.7036   | 37.3734    | 1         |
| cg07490808                     | GREB1L                        | 4.01E-06          | 4.01E-06             | 0.226492           | -4.41516                     | T down vs N                            | 46.712  | 20.6557   | 7.07515    | 1         |
| cg07493858                     | MGC45800                      | 0.00241293        | 0.00241293           | 3.15944            | 3.15944                      | T up vs N                              | 12.941  | 12.3952   | 15.3257    | 1         |
| cg07494218                     | OR2C1                         | 0.00203312        | 0.00203312           | 0.287095           | -3.48316                     | T down vs N                            | 13.531  | 14.5865   | 17.2487    | 1         |
| cg07494259                     | CHST4;CHST4                   | 0.00155076        | 0.00155076           | 0.26555            | -3.76577                     | T down vs N                            | 14.491  | 16.4671   | 18.1823    | 1         |
| cg07495357                     | CUL7;CUL7                     | 0.00665327        | 0.00665327           | 5.10778            | 5.10778                      | T up vs N                              | 9.7094  | 24.9083   | 41.0463    | 1         |
| cg07497941                     | MUC5B                         | 0.00079282        | 0.000792822          | 0.211892           | -4.71939                     | T down vs N                            | 17.021  | 22.551    | 21.1987    | 1         |
| cg07499182                     | STAR13                        | 4.88E-05          | 4.88E-05             | 0.275241           | -3.63318                     | T down vs N                            | 30.214  | 15.5888   | 8.25526    | 1         |
| cg07501988                     | MAP4K1;MAP4K1                 | 0.00024212        | 0.00024212           | 5.05803            | 5.05803                      | T up vs N                              | 22.066  | 24.6102   | 17.8449    | 1         |
| cg07505932                     | BEGAIN;BEGAIN                 | 6.88E-05          | 6.88E-05             | 0.300241           | -3.33065                     | T down vs N                            | 28.325  | 13.5586   | 7.65893    | 1         |
| cg07506573                     | CYP2A13                       | 0.0001613         | 0.000161295          | 0.275558           | -3.629                       | T down vs N                            | 23.977  | 15.561    | 10.3839    | 1         |
| cg07507114                     | OR52H1                        | 0.00021994        | 0.000219944          | 0.192783           | -5.18718                     | T down vs N                            | 22.509  | 25.3818   | 18.042     | 1         |

| Probeset ID                        | UCSC_REFGENE_NAME             | p-value<br>(Type) | p-value (T vs.<br>N) | Ratio (T<br>vs. N) | Fold-<br>Change (T<br>vs. N) | Fold-Change (T vs.<br>N) (Description) | F(Type) | SS (Type) | SS (Error) | F (Error) |
|------------------------------------|-------------------------------|-------------------|----------------------|--------------------|------------------------------|----------------------------------------|---------|-----------|------------|-----------|
| cg07507251                         | NTSDC2;NTSDC2                 | 4.51E-05          | 4.51E-05             | 0.309178           | -3.23438                     | T down vs N                            | 30.654  | 12.9056   | 6.73622    | 1         |
| cg07507755                         | ATP2C2;ATP2C2                 | 1.84E-05          | 1.84E-05             | 11.9817            | 11.9817                      | T up vs N                              | 36.056  | 57.763    | 25.6329    | 1         |
| cg07508299                         | PDE10A;PDE10A                 | 3.25E-08          | 3.25E-08             | 0.083566           | -11.9666                     | T down vs N                            | 97.625  | 57.7039   | 9.45722    | 1         |
| cg07510230                         | ZNRF2                         | 7.54E-06          | 7.54E-06             | 0.106779           | -9.36516                     | T down vs N                            | 42.042  | 46.8697   | 17.8373    | 1         |
| cg07511259                         | CSTT                          | 0.00011414        | 0.000114141          | 0.304124           | -3.28814                     | T down vs N                            | 25.684  | 13.2706   | 8.267      | 1         |
| cg07512361                         | SH2B2                         | 6.93E-05          | 6.93E-05             | 4.25835            | 4.25835                      | T up vs N                              | 28.284  | 19.662    | 11.1225    | 1         |
| cg07515422                         | SPTBN4                        | 0.00643954        | 0.00643954           | 3.27218            | 3.27218                      | T up vs N                              | 9.8067  | 13.1623   | 21.4749    | 1         |
| cg07515565                         | GMDS                          | 3.04E-05          | 3.04E-05             | 3.15008            | 3.15008                      | T up vs N                              | 32.943  | 12.3314   | 5.98925    | 1         |
| cg07516148                         | TAGAP;TAGAP;TAGAP             | 6.73E-05          | 6.73E-05             | 0.241052           | -4.14849                     | T down vs N                            | 28.439  | 18.959    | 10.6664    | 1         |
| LOC283761;LOC283761;LOC283761;L    |                               |                   |                      |                    |                              |                                        |         |           |            |           |
| cg07518380                         | OC283761                      | 2.15E-05          | 2.15E-05             | 0.272244           | -3.67318                     | T down vs N                            | 35.061  | 15.8546   | 7.23532    | 1         |
| cg07520976                         | GPRASP2;GPRASP2               | 0.00028216        | 0.000282157          | 0.293225           | -3.41035                     | T down vs N                            | 21.371  | 14.0967   | 10.5539    | 1         |
| cg07522913                         | HOXA3;HOXA3;HOXA3             | 0.00343323        | 0.00343323           | 4.62339            | 4.62339                      | T up vs N                              | 11.767  | 21.9576   | 29.8562    | 1         |
| cg07523753                         | FLJ42875                      | 9.79E-05          | 9.79E-05             | 4.71104            | 4.71104                      | T up vs N                              | 26.467  | 22.4995   | 13.6017    | 1         |
| cg07527126                         | SHISA6                        | 0.0011923         | 0.0011923            | 0.299181           | -3.34246                     | T down vs N                            | 15.456  | 13.6384   | 14.1187    | 1         |
| cg07531268                         | OSR1                          | 5.18E-06          | 5.18E-06             | 23.6406            | 23.6406                      | T up vs N                              | 44.781  | 93.7023   | 33.4791    | 1         |
| cg07531860                         | LOC100132707;LOC100132707     | 1.17E-05          | 1.17E-05             | 0.29123            | -3.43371                     | T down vs N                            | 39.02   | 14.2541   | 5.84477    | 1         |
| cg07532576                         | TTN;TTN;TTN;TTN               | 1.32E-05          | 1.32E-05             | 0.250357           | -3.9943                      | T down vs N                            | 38.186  | 17.963    | 7.52662    | 1         |
| cg07534843                         | MATN4;MATN4;MATN4;RBPJL       | 6.64E-05          | 6.64E-05             | 5.78474            | 5.78474                      | T up vs N                              | 28.51   | 28.8554   | 16.1938    | 1         |
| cg07536018                         | SIL1;SIL1                     | 5.34E-05          | 5.34E-05             | 0.270713           | -3.69395                     | T down vs N                            | 29.704  | 15.9923   | 8.61439    | 1         |
| cg07538039                         | C1QTNF7;C1QTNF7               | 0.00127466        | 0.00127466           | 0.316121           | -3.16335                     | T down vs N                            | 15.207  | 12.4219   | 13.0693    | 1         |
| cg07538890                         | FNDC3B;FNDC3B                 | 5.30E-07          | 5.30E-07             | 0.138263           | -7.23259                     | T down vs N                            | 64.44   | 36.6671   | 9.10419    | 1         |
| PCDHGA4;PCDHGA11;PCDHGA11;PCD      |                               |                   |                      |                    |                              |                                        |         |           |            |           |
| HGA9;PCDHGA1;PCDHGB1;PCDHGB6;      |                               |                   |                      |                    |                              |                                        |         |           |            |           |
| cg07539798                         | PCDHGA12;PCDHGB3;PCDHGB7;PCDH | 0.00071448        | 0.000714481          | 3.88357            | 3.88357                      | T up vs N                              | 17.433  | 17.2411   | 15.8238    | 1         |
| cg07539927                         | CST6                          | 0.00053427        | 0.000534265          | 0.308254           | -3.24408                     | T down vs N                            | 18.615  | 12.9715   | 11.1493    | 1         |
| cg07540542                         | ETV7                          | 0.00042678        | 0.000426784          | 6.57448            | 6.57448                      | T up vs N                              | 19.559  | 33.2164   | 27.1722    | 1         |
| cg07541020                         | ZNF239;ZNF239;ZNF239          | 8.74E-05          | 8.74E-05             | 0.158032           | -6.32785                     | T down vs N                            | 27.056  | 31.8813   | 18.8536    | 1         |
| cg07541744                         | IRX6                          | 0.00105653        | 0.00105653           | 8.06569            | 8.06569                      | T up vs N                              | 15.911  | 40.8192   | 41.0479    | 1         |
| cg07543967                         | SULT2B1;SULT2B1               | 0.000181          | 0.000180999          | 0.203116           | -4.9233                      | T down vs N                            | 23.425  | 23.7973   | 16.2544    | 1         |
| cg07545278                         | KIAA0895L;EXOC3L              | 0.00227899        | 0.00227899           | 4.46024            | 4.46024                      | T up vs N                              | 13.136  | 20.9393   | 25.505     | 1         |
| cg07547765                         | HOXB7                         | 5.12E-05          | 5.12E-05             | 4.73107            | 4.73107                      | T up vs N                              | 29.94   | 22.6229   | 12.0896    | 1         |
| cg07548313                         | CD1C                          | 0.00098574        | 0.000985743          | 0.2467             | -4.0535                      | T down vs N                            | 16.175  | 18.3467   | 18.1481    | 1         |
| cg07549474                         | MAGEC2                        | 0.00090342        | 0.00090342           | 0.321605           | -3.10941                     | T down vs N                            | 16.511  | 12.0537   | 11.6807    | 1         |
| cg07551060                         | GRK5                          | 0.00618602        | 0.00618602           | 0.316885           | -3.15571                     | T down vs N                            | 9.927   | 12.3698   | 19.9374    | 1         |
| cg07553761                         | TRIM59                        | 2.02E-05          | 2.02E-05             | 11.6234            | 11.6234                      | T up vs N                              | 35.447  | 56.359    | 25.4394    | 1         |
| cg07556059                         | TMEM200B                      | 0.0001349         | 0.000134904          | 3.36015            | 3.36015                      | T up vs N                              | 24.85   | 13.758    | 8.85841    | 1         |
| cg07560948                         | KCNQ4;KCNQ4                   | 1.25E-05          | 1.25E-05             | 0.270305           | -3.69953                     | T down vs N                            | 38.552  | 16.0292   | 6.65258    | 1         |
| cg07561162                         | GRIN2A;GRIN2A;GRIN2A          | 0.00054205        | 0.000542047          | 0.308553           | -3.24094                     | T down vs N                            | 19.152  | 12.1884   | 9.54604    | 1         |
| cg07568203                         | ORS1B5                        | 0.00271174        | 0.00271174           | 0.325514           | -3.07206                     | T down vs N                            | 12.546  | 11.7982   | 15.0463    | 1         |
| cg07568430                         | CSF1;CSF1;CSF1;CSF1           | 3.35E-05          | 3.35E-05             | 0.329752           | -3.03258                     | T down vs N                            | 32.377  | 11.5278   | 5.6969     | 1         |
| cg07569288                         | RPS11                         | 9.58E-05          | 9.58E-05             | 0.248639           | -4.0219                      | T down vs N                            | 26.579  | 18.1421   | 10.9211    | 1         |
| cg07572770                         | CHD1L                         | 0.00010071        | 0.000100706          | 0.184098           | -5.4319                      | T down vs N                            | 26.321  | 26.8232   | 16.3054    | 1         |
| cg07572773                         | KRTAP17-1                     | 1.86E-05          | 1.86E-05             | 0.261606           | -3.82255                     | T down vs N                            | 35.968  | 16.8409   | 7.49142    | 1         |
| cg07573342                         | C1QTNF6;C1QTNF6               | 0.00059846        | 0.000598457          | 0.326268           | -3.06497                     | T down vs N                            | 18.148  | 11.7497   | 10.3588    | 1         |
| cg07573872                         | SBNO2;SBNO2                   | 0.00162367        | 0.00162367           | 0.221476           | -4.51516                     | T down vs N                            | 14.325  | 21.8835   | 23.7714    | 1         |
| cg07574896                         | IRF4                          | 4.41E-06          | 4.41E-06             | 0.134299           | -7.44606                     | T down vs N                            | 45.984  | 37.7531   | 13.136     | 1         |
| cg07575407                         | MEGF11                        | 5.27E-05          | 5.27E-05             | 0.176996           | -5.64986                     | T down vs N                            | 29.78   | 28.0848   | 15.0891    | 1         |
| cg07575466                         | COL9A2                        | 0.00114395        | 0.00114395           | 3.1134             | 3.1134                       | T up vs N                              | 15.611  | 12.0809   | 12.3821    | 1         |
| cg07577731                         | KLK15;KLK15;KLK15             | 4.24E-05          | 4.24E-05             | 0.159081           | -6.28609                     | T down vs N                            | 31.011  | 31.6529   | 16.331     | 1         |
| cg07577997                         | C1orf161                      | 7.90E-07          | 7.90E-07             | 0.212029           | -4.71633                     | T down vs N                            | 60.591  | 22.5322   | 5.95       | 1         |
| cg07583137                         | CHMP4C                        | 0.00011094        | 0.000110944          | 0.218782           | -4.57077                     | T down vs N                            | 25.828  | 21.6305   | 13.4       | 1         |
| cg07584031                         | TIGD1;EIF4E2                  | 0.00016617        | 0.000166171          | 0.186833           | -5.35237                     | T down vs N                            | 23.834  | 26.3577   | 17.6944    | 1         |
| cg07585069                         | PROCA1                        | 0.00124637        | 0.00124637           | 3.20453            | 3.20453                      | T up vs N                              | 15.291  | 12.7025   | 13.2918    | 1         |
| cg07585427                         | NPPB                          | 7.33E-05          | 7.33E-05             | 0.194169           | -5.15015                     | T down vs N                            | 29.194  | 23.6812   | 12.1676    | 1         |
| cg07587796                         | ENPEP;ENPEP                   | 4.94E-05          | 4.94E-05             | 0.321811           | -3.10741                     | T down vs N                            | 30.142  | 12.04     | 6.39104    | 1         |
| cg07588439                         | MARS2                         | 0.00016488        | 0.000164877          | 0.289291           | -3.45673                     | T down vs N                            | 23.871  | 14.4089   | 9.65773    | 1         |
| cg07589078                         | ORS1A2                        | 0.0043104         | 0.0043104            | 0.320189           | -3.12315                     | T down vs N                            | 11.039  | 12.1476   | 17.6072    | 1         |
| TCF7L2;TCF7L2;TCF7L2;TCF7L2;TCF7L2 |                               |                   |                      |                    |                              |                                        |         |           |            |           |
| cg07591090                         | ;TCF7L2                       | 3.82E-06          | 3.82E-06             | 0.13762            | -7.2664                      | T down vs N                            | 47.09   | 36.8402   | 12.5173    | 1         |
| cg07592519                         | KCNQ1;KCNQ1                   | 0.00029503        | 0.000295034          | 0.108292           | -9.23427                     | T down vs N                            | 21.171  | 46.2818   | 34.9774    | 1         |
| cg07593415                         | TIMM13                        | 5.16E-05          | 5.16E-05             | 0.322481           | -3.10096                     | T down vs N                            | 29.9    | 11.9959   | 6.4192     | 1         |
| cg07594472                         | DEFB119;DEFB119               | 1.08E-06          | 1.08E-06             | 0.23169            | -4.31612                     | T down vs N                            | 57.682  | 20.0294   | 5.5558     | 1         |
| cg07596645                         | TNNT2;TNNT2;TNNT2;TNNT2       | 5.47E-06          | 5.47E-06             | 0.299732           | -3.33631                     | T down vs N                            | 44.367  | 13.5969   | 4.9034     | 1         |
| cg07598052                         | SLA2;SLA2                     | 3.03E-05          | 3.03E-05             | 0.109341           | -9.14574                     | T down vs N                            | 32.978  | 45.8815   | 22.2604    | 1         |
| cg07598370                         | OR8U8;OR5AP2                  | 4.28E-06          | 4.28E-06             | 0.156562           | -6.38723                     | T down vs N                            | 46.223  | 32.2049   | 11.1477    | 1         |
| cg07598464                         | OR2M3                         | 6.98E-06          | 6.98E-06             | 0.143784           | -6.95489                     | T down vs N                            | 42.593  | 35.2303   | 13.2341    | 1         |
| cg07598580                         | COL24A1                       | 5.62E-05          | 5.62E-05             | 3.04416            | 3.04416                      | T up vs N                              | 29.422  | 11.6072   | 6.3122     | 1         |
| cg07600533                         | KLHDC7B                       | 0.00407152        | 0.00407152           | 4.40418            | 4.40418                      | T up vs N                              | 11.219  | 20.5865   | 29.3589    | 1         |
| cg07600636                         | RASSF10                       | 0.0043767         | 0.0043767            | 3.59098            | 3.59098                      | T up vs N                              | 10.991  | 15.3078   | 22.2848    | 1         |
| cg07603941                         | MICA                          | 0.00431206        | 0.00431206           | 0.325321           | -3.07389                     | T down vs N                            | 11.038  | 11.8107   | 17.1208    | 1         |

| Probeset ID                                                                                     | UCSC_REFGENE_NAME          | p-value<br>(Type) | p-value (T vs.<br>N) | Ratio (T<br>vs. N) | Fold-<br>Change (T<br>vs. N) | Fold-Change (T vs.<br>N) (Description) | F(Type) | SS (Type) | SS (Error) | F (Error) |
|-------------------------------------------------------------------------------------------------|----------------------------|-------------------|----------------------|--------------------|------------------------------|----------------------------------------|---------|-----------|------------|-----------|
| cg07605269                                                                                      | CAMTA1                     | 0.00061218        | 0.000612182          | 0.302642           | -3.30423                     | T down vs N                            | 18.056  | 13.3797   | 11.8562    | 1         |
| cg07611121                                                                                      | TRIO                       | 0.00205868        | 0.00205868           | 0.312219           | -3.20288                     | T down vs N                            | 13.487  | 12.6913   | 15.056     | 1         |
| cg07613023                                                                                      | BACH2;BACH2                | 3.01E-05          | 3.01E-05             | 0.329488           | -3.03501                     | T down vs N                            | 33.01   | 11.5445   | 5.59572    | 1         |
| cg07613930                                                                                      | HRK                        | 0.00092694        | 0.000926937          | 3.90762            | 3.90762                      | T up vs N                              | 16.412  | 17.3983   | 16.9621    | 1         |
| cg07615383                                                                                      | IGF1R                      | 0.00164264        | 0.00164264           | 0.268838           | -3.71971                     | T down vs N                            | 14.284  | 16.1629   | 18.1048    | 1         |
| cg07616394                                                                                      | HHEX                       | 7.20E-05          | 7.20E-05             | 0.228642           | -4.37365                     | T down vs N                            | 28.078  | 20.3937   | 11.6212    | 1         |
| cg07618110                                                                                      | MS4A1;MS4A1                | 1.76E-06          | 1.76E-06             | 0.303814           | -3.29149                     | T down vs N                            | 53.377  | 13.2933   | 3.98476    | 1         |
| cg07618435                                                                                      | HIST1H2BD                  | 0.00108242        | 0.00108242           | 0.290168           | -3.44628                     | T down vs N                            | 15.819  | 14.3386   | 14.5026    | 1         |
| cg07618581                                                                                      | SLCO3A1;SLCO3A1            | 0.00053515        | 0.000535151          | 3.02699            | 3.02699                      | T up vs N                              | 18.608  | 11.4896   | 9.87919    | 1         |
| cg07619683                                                                                      | ESR1;ESR1                  | 0.00020601        | 0.000206011          | 0.153522           | -6.51371                     | T down vs N                            | 22.814  | 32.8896   | 23.0663    | 1         |
| cg07621046                                                                                      | C10orf82                   | 0.0036388         | 0.0036388            | 4.56666            | 4.56666                      | T up vs N                              | 11.579  | 21.6049   | 29.8543    | 1         |
| cg07622521                                                                                      | ATOH8                      | 0.00052093        | 0.000520929          | 0.265973           | -3.75979                     | T down vs N                            | 18.72   | 16.4276   | 14.0408    | 1         |
| cg07625430                                                                                      | C19orf50                   | 0.00034096        | 0.000340956          | 0.303507           | -3.29481                     | T down vs N                            | 20.53   | 13.3158   | 10.3775    | 1         |
| cg07626033                                                                                      | SLC6A1                     | 0.00013925        | 0.000139249          | 3.00501            | 3.00501                      | T up vs N                              | 24.693  | 11.3388   | 7.34693    | 1         |
| PCDHGA4;PCDHGA6;PCDHGA1;PCDHG<br>A5;PCDHGB1;PCDHGB4;PCDHGA3;PC<br>DHGA2;PCDHGA8;PCDHGA7;PCDHGB2 |                            |                   |                      |                    |                              |                                        |         |           |            |           |
| cg07628577                                                                                      | SEMA3B;SEMA3B              | 0.00113301        | 0.00113301           | 3.38448            | 3.38448                      | T up vs N                              | 15.647  | 13.9223   | 14.2365    | 1         |
| cg07630787                                                                                      | LMF1                       | 3.82E-05          | 3.82E-05             | 0.329214           | -3.03754                     | T down vs N                            | 31.615  | 11.5618   | 5.85135    | 1         |
| cg07631407                                                                                      | TTBK1                      | 0.00427642        | 0.00427642           | 3.02464            | 3.02464                      | T up vs N                              | 11.305  | 10.7985   | 14.3282    | 1         |
| cg07631533                                                                                      | SHISA9                     | 1.85E-05          | 1.85E-05             | 0.234692           | -4.26091                     | T down vs N                            | 35.991  | 19.6783   | 8.74799    | 1         |
| cg07631828                                                                                      | CTS2                       | 0.00061349        | 0.000613488          | 3.55774            | 3.55774                      | T up vs N                              | 18.047  | 15.0859   | 13.3746    | 1         |
| cg07633317                                                                                      | ZNF423                     | 3.12E-05          | 3.12E-05             | 0.224161           | -4.46107                     | T down vs N                            | 32.789  | 20.9445   | 10.2203    | 1         |
| cg07635623                                                                                      | SERPINB1                   | 5.21E-05          | 5.21E-05             | 32.1561            | 32.1561                      | T up vs N                              | 29.839  | 112.816   | 60.4934    | 1         |
| PSMG3;KIAA1908;KIAA1908;KIAA1908                                                                |                            |                   |                      |                    |                              |                                        |         |           |            |           |
| cg07639783                                                                                      | ;PSMG3                     | 0.00018425        | 0.00018425           | 0.143999           | -6.94449                     | T down vs N                            | 23.34   | 35.176    | 24.1136    | 1         |
| cg07640473                                                                                      | SEMA3F                     | 0.00347328        | 0.00347328           | 4.48644            | 4.48644                      | T up vs N                              | 11.73   | 21.1036   | 28.7871    | 1         |
| MIR19A;MIR17HG;MIR17HG;MIR20A;<br>MIR17;MIR19B1;MIR18A                                          |                            |                   |                      |                    |                              |                                        |         |           |            |           |
| cg07641807                                                                                      | MIR17;MIR19B1;MIR18A       | 0.00014707        | 0.000147073          | 0.198713           | -5.03239                     | T down vs N                            | 24.426  | 24.4562   | 16.0201    | 1         |
| cg07643942                                                                                      | LACRT                      | 8.72E-05          | 8.72E-05             | 0.28381            | -3.52348                     | T down vs N                            | 27.068  | 14.8567   | 8.78179    | 1         |
| ADRA1A;ADRA1A;ADRA1A;ADRA1A;A<br>DRA1A;ADRA1A;ADRA1A;ADRA1A                                     |                            |                   |                      |                    |                              |                                        |         |           |            |           |
| cg07645844                                                                                      | DRA1A;ADRA1A;ADRA1A;ADRA1A | 0.00020041        | 0.000200411          | 7.23761            | 7.23761                      | T up vs N                              | 22.943  | 36.6928   | 25.5886    | 1         |
| cg07647677                                                                                      | MICA                       | 0.00011931        | 0.000119306          | 0.280974           | -3.55905                     | T down vs N                            | 25.461  | 15.0946   | 9.48552    | 1         |
| cg07648740                                                                                      | HTR5A                      | 0.00012465        | 0.000124645          | 0.23583            | -4.24034                     | T down vs N                            | 25.242  | 19.5471   | 12.3901    | 1         |
| cg07654762                                                                                      | TNXB                       | 0.00020973        | 0.000209733          | 0.326758           | -3.06037                     | T down vs N                            | 22.73   | 11.7182   | 8.24854    | 1         |
| cg07654934                                                                                      | LXN;LXN;GFM1               | 0.00019098        | 0.000190983          | 4.10927            | 4.10927                      | T up vs N                              | 23.17   | 18.7067   | 12.9178    | 1         |
| cg07657463                                                                                      | NSUN7                      | 1.54E-05          | 1.54E-05             | 0.255492           | -3.91402                     | T down vs N                            | 37.175  | 17.4401   | 7.50616    | 1         |
| cg07658040                                                                                      | CEACAM6                    | 1.69E-05          | 1.69E-05             | 0.156382           | -6.3946                      | T down vs N                            | 36.594  | 32.245    | 14.0986    | 1         |
| cg07658681                                                                                      | CDH23                      | 0.0007784         | 0.000778397          | 0.274157           | -3.64755                     | T down vs N                            | 17.093  | 15.6844   | 14.6814    | 1         |
| cg07659054                                                                                      | HOXA1;HOXA1                | 8.76E-06          | 8.76E-06             | 13.3485            | 13.3485                      | T up vs N                              | 40.988  | 62.8972   | 24.5524    | 1         |
| cg07660671                                                                                      | SOX7                       | 0.00021182        | 0.000211823          | 4.24766            | 4.24766                      | T up vs N                              | 22.684  | 19.5938   | 13.8204    | 1         |
| cg07664000                                                                                      | TMIGD1                     | 1.56E-05          | 1.56E-05             | 0.218516           | -4.57633                     | T down vs N                            | 37.104  | 21.6652   | 9.34236    | 1         |
| cg07664999                                                                                      | RIMS2;RIMS2                | 3.19E-05          | 3.19E-05             | 0.178506           | -5.60205                     | T down vs N                            | 32.672  | 27.8099   | 13.619     | 1         |
| ACRV1;ACRV1;ACRV1;ACRV1;ACRV1;A<br>CRV1;ACRV1;ACRV1;ACRV1                                       |                            |                   |                      |                    |                              |                                        |         |           |            |           |
| cg07665222                                                                                      | CRV1;ACRV1;ACRV1;ACRV1     | 0.00118497        | 0.00118497           | 0.319578           | -3.12912                     | T down vs N                            | 15.479  | 12.1884   | 12.5987    | 1         |
| cg07670736                                                                                      | ALG14                      | 0.00029359        | 0.000293588          | 0.312291           | -3.20214                     | T down vs N                            | 21.193  | 12.6862   | 9.57768    | 1         |
| cg07673230                                                                                      | LAPTM4B                    | 3.84E-06          | 3.84E-06             | 0.141568           | -7.06376                     | T down vs N                            | 47.054  | 35.7969   | 12.1722    | 1         |
| cg07674459                                                                                      | FLJ42289                   | 1.74E-05          | 1.74E-05             | 0.291708           | -3.42808                     | T down vs N                            | 36.41   | 14.2162   | 6.24719    | 1         |
| cg07675184                                                                                      | EMX2OS                     | 0.00014213        | 0.000142133          | 0.308249           | -3.24413                     | T down vs N                            | 24.593  | 12.9719   | 8.43949    | 1         |
| cg07676002                                                                                      | CDH22;CDH22                | 2.23E-06          | 2.23E-06             | 4.36807            | 4.36807                      | T up vs N                              | 51.418  | 20.3585   | 6.33502    | 1         |
| cg07676849                                                                                      | FOLR3                      | 0.00056236        | 0.000562355          | 0.296106           | -3.37717                     | T down vs N                            | 18.403  | 13.873    | 12.0612    | 1         |
| cg07676920                                                                                      | PPARG;PPARG;PPARG;PPARG    | 0.00071908        | 0.000719076          | 0.323231           | -3.09376                     | T down vs N                            | 17.408  | 11.9467   | 10.9807    | 1         |
| cg07678669                                                                                      | KIR3DL1                    | 8.90E-05          | 8.90E-05             | 0.1929             | -5.18404                     | T down vs N                            | 26.961  | 25.3631   | 15.0515    | 1         |
| cg07679948                                                                                      | DGKA;DGKA;DGKA;DGKA        | 0.00017514        | 0.000175144          | 12.4011            | 12.4011                      | T up vs N                              | 23.582  | 59.3744   | 40.2854    | 1         |
| cg07683276                                                                                      | C6orf94;LTV1               | 0.00019472        | 0.00019472           | 0.2394             | -4.17711                     | T down vs N                            | 23.079  | 19.1427   | 13.2712    | 1         |
| cg07683388                                                                                      | ANKRD44                    | 0.0002639         | 0.000263899          | 11.9503            | 11.9503                      | T up vs N                              | 21.673  | 57.6407   | 42.5527    | 1         |
| cg07685786                                                                                      | S100B                      | 0.00275402        | 0.00275402           | 0.317337           | -3.15123                     | T down vs N                            | 12.494  | 12.3392   | 15.8015    | 1         |
| ACOXL;ACOXL;ACOXL;ACOXL;ACOXL;A<br>COXL                                                         |                            |                   |                      |                    |                              |                                        |         |           |            |           |
| cg07688988                                                                                      | COXL                       | 0.00357312        | 0.00357312           | 5.16013            | 5.16013                      | T up vs N                              | 11.638  | 25.2208   | 34.6746    | 1         |
| cg07690018                                                                                      | CPNE7;CPNE7                | 0.00019162        | 0.000191618          | 10.09              | 10.09                        | T up vs N                              | 23.155  | 50.0458   | 34.5822    | 1         |
| cg07692929                                                                                      | OLFML1                     | 0.00036343        | 0.000363432          | 0.315509           | -3.16948                     | T down vs N                            | 20.251  | 12.4637   | 9.84725    | 1         |
| cg07696099                                                                                      | HPYR1                      | 1.45E-05          | 1.45E-05             | 0.239185           | -4.18086                     | T down vs N                            | 37.565  | 19.1667   | 8.16372    | 1         |
| cg07696102                                                                                      | BTBD3                      | 1.19E-07          | 1.19E-07             | 0.121507           | -8.22999                     | T down vs N                            | 80.738  | 41.6115   | 8.24626    | 1         |
| cg07696842                                                                                      | CHST11                     | 7.10E-06          | 7.10E-06             | 0.151863           | -6.58488                     | T down vs N                            | 42.471  | 33.2722   | 12.5346    | 1         |
| cg07696985                                                                                      | CSNK1G2                    | 0.00318273        | 0.00318273           | 0.307826           | -3.24858                     | T down vs N                            | 12.015  | 13.0021   | 17.315     | 1         |
| cg07697891                                                                                      | ZNF385B                    | 4.19E-06          | 4.19E-06             | 0.266506           | -3.75225                     | T down vs N                            | 46.372  | 16.3779   | 5.65094    | 1         |
| cg07698102                                                                                      | PARD3B;PARD3B;PARD3B       | 0.0011539         | 0.0011539            | 0.267236           | -3.74201                     | T down vs N                            | 15.578  | 16.3103   | 16.7518    | 1         |
| cg07699648                                                                                      | HLA-DOA                    | 0.00033759        | 0.00033759           | 0.307339           | -3.25373                     | T down vs N                            | 20.574  | 13.0371   | 10.1388    | 1         |
| cg07701018                                                                                      | FABP5                      | 4.64E-05          | 4.64E-05             | 38.8325            | 38.8325                      | T up vs N                              | 30.499  | 125.415   | 65.793     | 1         |
| cg07703701                                                                                      | PDE4DIP;PDE4DIP;PDE4DIP    | 0.00305703        | 0.00305703           | 0.277009           | -3.60998                     | T down vs N                            | 12.147  | 15.4344   | 20.3298    | 1         |

| Probeset ID                                                                                     | UCSC_REFGENE_NAME                | p-value<br>(Type) | p-value (T vs.<br>N) | Ratio (T<br>vs. N) | Fold-<br>Change (T<br>vs. N) | Fold-Change (T vs.<br>N) (Description) | F(Type) | SS (Type) | SS (Error) | F (Error) |
|-------------------------------------------------------------------------------------------------|----------------------------------|-------------------|----------------------|--------------------|------------------------------|----------------------------------------|---------|-----------|------------|-----------|
| cg07707817                                                                                      | ARGFX                            | 0.00042201        | 0.000422007          | 0.289269           | -3.45699                     | T down vs N                            | 19.607  | 14.4107   | 11.7596    | 1         |
| cg07707891                                                                                      | MRPS6;SLC5A3                     | 2.14E-05          | 2.14E-05             | 0.290718           | -3.43976                     | T down vs N                            | 35.103  | 14.2948   | 6.51559    | 1         |
| cg07709210                                                                                      | PGC;PGC                          | 5.66E-06          | 5.66E-06             | 0.188999           | -5.29102                     | T down vs N                            | 44.119  | 25.9967   | 9.42782    | 1         |
| cg07709692                                                                                      | CSTT                             | 0.00018961        | 0.000189608          | 0.258848           | -3.86327                     | T down vs N                            | 23.204  | 17.1081   | 11.7965    | 1         |
| cg07710211                                                                                      | CNPY3                            | 0.00079433        | 0.000794331          | 0.305034           | -3.27832                     | T down vs N                            | 17.013  | 13.204    | 12.4177    | 1         |
| cg07710883                                                                                      | CAPN1                            | 0.00016041        | 0.000160414          | 5.1316             | 5.1316                       | T up vs N                              | 24.004  | 25.0506   | 16.6979    | 1         |
| cg07712541                                                                                      | GRID1                            | 1.69E-06          | 1.69E-06             | 4.00157            | 4.00157                      | T up vs N                              | 53.737  | 18.0102   | 5.3625     | 1         |
| cg07716322                                                                                      | CABLES1;CABLES1;CABLES1          | 6.34E-05          | 6.34E-05             | 0.289363           | -3.45587                     | T down vs N                            | 28.768  | 14.4031   | 8.01078    | 1         |
| cg07716603                                                                                      | IRAK2                            | 0.00011407        | 0.000114066          | 0.326019           | -3.06731                     | T down vs N                            | 25.687  | 11.7657   | 7.32857    | 1         |
| cg07716832                                                                                      | PRKCE                            | 0.00159596        | 0.00159596           | 0.306798           | -3.25948                     | T down vs N                            | 14.387  | 13.0761   | 14.5419    | 1         |
| cg07716847                                                                                      | ELMO3                            | 1.06E-05          | 1.06E-05             | 4.70641            | 4.70641                      | T up vs N                              | 39.665  | 22.471    | 9.06437    | 1         |
| PCDHGA4;PCDHGA1;PCDHGA6;PCDHG<br>A5;PCDHGB1;PCDHGA3;PCDHGA2;PC                                  |                                  |                   |                      |                    |                              |                                        |         |           |            |           |
| cg07717903                                                                                      | DHGA6;PCDHGB2;PCDHGB3            | 2.24E-05          | 2.24E-05             | 4.07631            | 4.07631                      | T up vs N                              | 34.814  | 18.4941   | 8.49954    | 1         |
| cg07719077                                                                                      | KIAA1211                         | 0.00012793        | 0.000127929          | 0.260781           | -3.83464                     | T down vs N                            | 25.113  | 16.9203   | 10.7804    | 1         |
| cg07719142                                                                                      | WDR70                            | 0.00032724        | 0.000327235          | 0.27101            | -3.6899                      | T down vs N                            | 20.711  | 15.9654   | 12.3339    | 1         |
| cg07722360                                                                                      | BANF2;BANF2;BANF2                | 1.10E-05          | 1.10E-05             | 0.288787           | -3.46276                     | T down vs N                            | 39.393  | 14.4495   | 5.86889    | 1         |
| cg07722722                                                                                      | C1orf228                         | 3.15E-06          | 3.15E-06             | 0.225461           | -4.43536                     | T down vs N                            | 48.604  | 20.7829   | 6.84154    | 1         |
| cg07725033                                                                                      | LOC428945                        | 0.00428945        | 0.00428945           | 0.31279            | -3.19703                     | T down vs N                            | 11.054  | 12.6515   | 18.312     | 1         |
| cg07725389                                                                                      | MIR219-1                         | 5.01E-05          | 5.01E-05             | 0.307133           | -3.25592                     | T down vs N                            | 30.067  | 13.0519   | 6.94551    | 1         |
| cg07725579                                                                                      | SIRPB2;SIRPB2                    | 6.79E-05          | 6.79E-05             | 0.208678           | -4.79208                     | T down vs N                            | 28.389  | 22.9975   | 12.9612    | 1         |
| cg07725836                                                                                      | SYPL2                            | 1.03E-05          | 1.03E-05             | 0.244701           | -4.08663                     | T down vs N                            | 39.893  | 18.5607   | 7.44418    | 1         |
| cg07725967                                                                                      | SORCS2                           | 0.00650238        | 0.00650238           | 0.255349           | -3.91621                     | T down vs N                            | 9.7777  | 17.4544   | 28.5621    | 1         |
| PCDHGA4;PCDHGA11;PCDHGA11;PCD<br>HGA9;PCDHGA1;PCDHGB1;PCDHGB6;<br>PCDHGA12;PCDHGB3;PCDHGB7;PCDH |                                  |                   |                      |                    |                              |                                        |         |           |            |           |
| cg07730329                                                                                      | CUBN                             | 2.90E-05          | 2.90E-05             | 3.61601            | 3.61601                      | T up vs N                              | 33.223  | 15.4746   | 7.45251    | 1         |
| cg07732336                                                                                      | MIR1180;B9D1                     | 1.30E-05          | 1.30E-05             | 0.222308           | -4.49827                     | T down vs N                            | 38.321  | 21.1778   | 8.84238    | 1         |
| cg07733567                                                                                      | F7;F7                            | 4.54E-05          | 4.54E-05             | 0.15342            | -6.51804                     | T down vs N                            | 30.615  | 32.9129   | 17.2012    | 1         |
| cg07736115                                                                                      | TCEA3;TCEA3                      | 4.77E-05          | 4.77E-05             | 0.29321            | -3.41052                     | T down vs N                            | 30.342  | 14.0979   | 7.43416    | 1         |
| cg07736389                                                                                      | ITGA2                            | 0.00055082        | 0.000550822          | 3.58801            | 3.58801                      | T up vs N                              | 18.489  | 15.288    | 13.23      | 1         |
| cg07737131                                                                                      | IGF2BP1;IGF2BP1                  | 0.00053559        | 0.000535594          | 0.11482            | -8.70932                     | T down vs N                            | 18.605  | 43.8767   | 37.7339    | 1         |
| cg07738730                                                                                      | NAGS;YYY;YYY                     | 6.44E-06          | 6.44E-06             | 0.23265            | -4.2983                      | T down vs N                            | 43.172  | 19.9162   | 7.38126    | 1         |
| cg07739179                                                                                      | FNDC1                            | 0.00035482        | 0.000354823          | 0.309573           | -3.23026                     | T down vs N                            | 20.356  | 12.8775   | 10.122     | 1         |
| cg07739841                                                                                      | CAPSL;CAPSL                      | 5.86E-07          | 5.86E-07             | 0.248353           | -4.02653                     | T down vs N                            | 63.46   | 18.1721   | 4.5817     | 1         |
| cg07741805                                                                                      | FZD10                            | 0.00021618        | 0.000216178          | 0.24847            | -4.02462                     | T down vs N                            | 22.589  | 18.1597   | 12.8626    | 1         |
| cg07742404                                                                                      | C3orf22                          | 0.00086156        | 0.000861559          | 3.25061            | 3.25061                      | T up vs N                              | 16.695  | 13.0159   | 12.474     | 1         |
| cg07743179                                                                                      | CCR2;CCR2                        | 8.57E-05          | 8.57E-05             | 0.320802           | -3.11718                     | T down vs N                            | 27.154  | 12.1068   | 7.13363    | 1         |
| cg07743747                                                                                      | PATE2                            | 8.38E-05          | 8.38E-05             | 0.277677           | -3.6013                      | T down vs N                            | 27.277  | 15.3766   | 9.01958    | 1         |
| cg07747336                                                                                      | FOX1;FOX1                        | 5.17E-05          | 5.17E-05             | 0.288968           | -3.46059                     | T down vs N                            | 29.882  | 14.4348   | 7.72893    | 1         |
| cg07748217                                                                                      | C16orf81                         | 0.00126119        | 0.00126119           | 4.01466            | 4.01466                      | T up vs N                              | 15.247  | 18.0951   | 18.989     | 1         |
| cg07748753                                                                                      | MIR330;EML2                      | 0.00013864        | 0.000138637          | 0.217151           | -4.6051                      | T down vs N                            | 24.715  | 21.8441   | 14.1413    | 1         |
| cg07749923                                                                                      | SLC22A9                          | 0.00619964        | 0.00619964           | 3.53877            | 3.53877                      | T up vs N                              | 9.9204  | 14.959    | 24.1266    | 1         |
| cg07751764                                                                                      | MAGEB16;MAGEB16                  | 0.00102135        | 0.00102135           | 0.278401           | -3.59194                     | T down vs N                            | 16.04   | 15.3142   | 15.2764    | 1         |
| cg07752550                                                                                      | LRR61;ACTR3C;LRR61               | 0.0001091         | 0.000109103          | 0.242406           | -4.1253                      | T down vs N                            | 25.912  | 18.8099   | 11.6145    | 1         |
| cg07753583                                                                                      | CASP10;CASP10;CASP10;CASP10;CASP | 0.00063143        | 0.000631434          | 5.59059            | 5.59059                      | T up vs N                              | 17.93   | 27.7438   | 24.7573    | 1         |
| cg07754492                                                                                      | PITX3                            | 0.00050405        | 0.000504048          | 0.273892           | -3.65107                     | T down vs N                            | 18.857  | 15.7078   | 13.3279    | 1         |
| cg07754999                                                                                      | SCNN4                            | 0.00310792        | 0.00310792           | 10.9921            | 10.9921                      | T up vs N                              | 12.093  | 53.8223   | 71.2121    | 1         |
| cg07756483                                                                                      | SETD2                            | 7.42E-05          | 7.42E-05             | 0.268253           | -3.72783                     | T down vs N                            | 27.915  | 16.2166   | 9.29499    | 1         |
| cg07757460                                                                                      | COL23A1                          | 6.55E-05          | 6.55E-05             | 0.287337           | -3.48024                     | T down vs N                            | 28.585  | 14.5668   | 8.15348    | 1         |
| cg07763376                                                                                      | SFMBT2                           | 0.00029247        | 0.000292474          | 3.49155            | 3.49155                      | T up vs N                              | 21.21   | 14.6427   | 11.0459    | 1         |
| cg07763467                                                                                      | IRX2;IRX2                        | 0.00013333        | 0.000133334          | 0.265775           | -3.76259                     | T down vs N                            | 24.908  | 16.4461   | 10.5646    | 1         |
| cg07766803                                                                                      | GCSH;GCSH                        | 5.06E-05          | 5.06E-05             | 0.281592           | -3.55124                     | T down vs N                            | 30.002  | 15.0424   | 8.02219    | 1         |
| cg07768763                                                                                      | ATG4D                            | 0.00083796        | 0.000837956          | 0.325491           | -3.07229                     | T down vs N                            | 16.804  | 11.7998   | 11.2356    | 1         |
| cg07769588                                                                                      | NOB1                             | 2.97E-05          | 2.97E-05             | 0.167133           | -5.98327                     | T down vs N                            | 33.095  | 29.9755   | 14.492     | 1         |
| cg07770353                                                                                      | MST1P9                           | 0.00021353        | 0.000213533          | 0.301725           | -3.31427                     | T down vs N                            | 22.647  | 13.4477   | 9.50093    | 1         |
| cg07772660                                                                                      | AGPAT9                           | 3.59E-05          | 3.59E-05             | 4.76551            | 4.76551                      | T up vs N                              | 31.962  | 22.8346   | 11.4309    | 1         |
| cg07775417                                                                                      | ALPL2                            | 5.93E-05          | 5.93E-05             | 0.183478           | -5.45024                     | T down vs N                            | 29.128  | 26.9301   | 14.7928    | 1         |
| cg07777793                                                                                      | ARHGAP25;ARHGAP25;ARHGAP25;AR    | 3.02E-05          | 3.02E-05             | 0.313016           | -3.19473                     | T down vs N                            | 32.995  | 12.6357   | 6.1273     | 1         |
| cg07780630                                                                                      | SCLY                             | 3.16E-05          | 3.16E-05             | 0.172626           | -5.79288                     | T down vs N                            | 32.716  | 28.9016   | 14.1346    | 1         |
| cg07780694                                                                                      | NGDN;NGDN                        | 0.00244777        | 0.00244777           | 3.38782            | 3.38782                      | T up vs N                              | 12.892  | 13.9448   | 17.3069    | 1         |
| cg07783220                                                                                      | WWTR1;WWTR1;WWTR1                | 2.85E-05          | 2.85E-05             | 0.304755           | -3.28132                     | T down vs N                            | 33.33   | 13.2244   | 6.34829    | 1         |
| cg07784293                                                                                      | TIGD4                            | 4.48E-06          | 4.48E-06             | 0.14723            | -6.79209                     | T down vs N                            | 45.868  | 34.375    | 11.991     | 1         |
| cg07784442                                                                                      | NOS1AP;NOS1AP                    | 0.00018585        | 0.000185852          | 0.302998           | -3.30035                     | T down vs N                            | 23.299  | 13.3534   | 9.17006    | 1         |
| cg07786995                                                                                      | ATP8B3                           | 0.00297233        | 0.00297233           | 0.307555           | -3.25146                     | T down vs N                            | 12.24   | 13.0216   | 17.0214    | 1         |
| cg07788437                                                                                      | SCARNA4;KIAA0907                 | 0.00112118        | 0.00112118           | 0.231413           | -4.32129                     | T down vs N                            | 15.686  | 20.0622   | 20.4633    | 1         |
| cg07789281                                                                                      | FKBPL                            | 2.07E-06          | 2.07E-06             | 0.122008           | -8.1962                      | T down vs N                            | 52.022  | 41.4493   | 12.7482    | 1         |
| cg07790778                                                                                      | KAAG1;KAAG1;DCDC2                | 0.00084043        | 0.000840425          | 0.219413           | -4.55761                     | T down vs N                            | 16.792  | 21.5485   | 20.5322    | 1         |
| cg07791578                                                                                      |                                  | 0.00260608        | 0.00260608           | 5.6464             | 5.6464                       | T up vs N                              | 12.68   | 28.065    | 35.4142    | 1         |

| Probeset ID                   | UCSC_REFGENE_NAME          | p-value<br>(Type) | p-value (T vs.<br>N) | Ratio (T<br>vs. N) | Fold-<br>Change (T<br>vs. N) | Fold-Change (T vs.<br>N) (Description) | F(Type) | SS (Type) | SS (Error) | F (Error) |
|-------------------------------|----------------------------|-------------------|----------------------|--------------------|------------------------------|----------------------------------------|---------|-----------|------------|-----------|
| cg07794885                    | IL17C                      | 0.00015092        | 0.000150921          | 0.247885           | -4.03412                     | T down vs N                            | 24.3    | 18.2213   | 11.9978    | 1         |
| cg07795168                    | FLT4                       | 0.00388627        | 0.00388627           | 0.276288           | -3.61941                     | T down vs N                            | 11.368  | 15.4972   | 21.8124    | 1         |
| cg07796220                    | MFSO6L                     | 1.41E-06          | 1.41E-06             | 4.85548            | 4.85548                      | T up vs N                              | 55.339  | 23.3849   | 6.76121    | 1         |
| cg07798605                    | KLK9                       | 0.00017863        | 0.00017863           | 0.323762           | -3.08869                     | T down vs N                            | 23.488  | 11.912    | 8.1146     | 1         |
| cg07798774                    | SCAND3                     | 0.00404454        | 0.00404454           | 0.313841           | -3.18633                     | T down vs N                            | 11.24   | 12.5786   | 17.9049    | 1         |
| cg07800325                    | BEST1;BEST1                | 2.58E-05          | 2.58E-05             | 9.84744            | 9.84744                      | T up vs N                              | 33.939  | 48.9975   | 23.0991    | 1         |
| PCDHGA4;PCDHGA2;PCDHGB2;PCDHG |                            |                   |                      |                    |                              |                                        |         |           |            |           |
| cg07804076                    | A1;PCDHGB1;PCDHGA3;PCDHGB2 | 0.00064271        | 0.000642714          | 3.28069            | 3.28069                      | T up vs N                              | 17.858  | 13.22     | 11.8443    | 1         |
| cg07804289                    | SPRR2C                     | 8.43E-09          | 8.43E-09             | 0.100571           | -9.94318                     | T down vs N                            | 118.3   | 49.413    | 6.68286    | 1         |
| cg07804888                    | OR8U8;OR5R1                | 3.02E-06          | 3.02E-06             | 0.251844           | -3.97072                     | T down vs N                            | 48.93   | 17.8097   | 5.82375    | 1         |
| cg07805064                    | TRIM40                     | 0.0021066         | 0.0021066            | 0.290776           | -3.43907                     | T down vs N                            | 13.407  | 14.2902   | 17.0539    | 1         |
| cg07805542                    | PIK3CD                     | 1.42E-05          | 1.42E-05             | 0.238504           | -4.19281                     | T down vs N                            | 37.72   | 19.2432   | 8.16259    | 1         |
| cg07806248                    | PROP1                      | 0.0013138         | 0.0013138            | 0.286299           | -3.49285                     | T down vs N                            | 15.096  | 14.6515   | 15.5292    | 1         |
| cg07807497                    | HS3ST4                     | 1.60E-05          | 1.60E-05             | 0.155422           | -6.43409                     | T down vs N                            | 36.953  | 32.4593   | 14.0542    | 1         |
| cg07809144                    | MIR98;HUWE1                | 0.00041358        | 0.000413579          | 0.311127           | -3.21412                     | T down vs N                            | 19.693  | 12.7678   | 10.3733    | 1         |
| cg07809589                    | MEIS1                      | 0.00086224        | 0.000862238          | 0.22959            | -4.3556                      | T down vs N                            | 16.692  | 20.2796   | 19.4389    | 1         |
| cg07810039                    | TGFB2;TGFB2                | 3.65E-05          | 3.65E-05             | 0.292225           | -3.42202                     | T down vs N                            | 31.874  | 14.1754   | 7.11561    | 1         |
| cg07813265                    | CDC14A;CDC14A;CDC14A       | 0.00020849        | 0.000208491          | 0.26306            | -3.80141                     | T down vs N                            | 22.758  | 16.7019   | 11.7422    | 1         |
| cg07814289                    | DNM1;DNM1                  | 0.00326446        | 0.00326446           | 4.61629            | 4.61629                      | T up vs N                              | 11.932  | 21.9135   | 29.3857    | 1         |
| cg07816271                    | DGCR10                     | 5.23E-06          | 5.23E-06             | 0.252663           | -3.95783                     | T down vs N                            | 44.71   | 17.7259   | 6.34345    | 1         |
| cg07816556                    | HIST1H1A;HIST1H1A          | 0.00029537        | 0.000295368          | 6.95156            | 6.95156                      | T up vs N                              | 21.166  | 35.2129   | 26.6185    | 1         |
| cg07821737                    | NLRP9;NLRP9                | 0.00024388        | 0.000243878          | 0.22088            | -4.52735                     | T down vs N                            | 22.033  | 21.3597   | 15.5112    | 1         |
| cg07822928                    | HCN2                       | 0.00010319        | 0.000103188          | 4.06826            | 4.06826                      | T up vs N                              | 26.196  | 18.4421   | 11.264     | 1         |
| cg07823492                    | HOXB1                      | 7.03E-05          | 7.03E-05             | 17.7438            | 17.7438                      | T up vs N                              | 28.207  | 77.4729   | 43.9448    | 1         |
| cg07824824                    | CIDEA;CIDEA                | 7.59E-05          | 7.59E-05             | 9.66862            | 9.66862                      | T up vs N                              | 27.798  | 48.2155   | 27.7523    | 1         |
| cg07828024                    | ZC3H12D                    | 1.34E-05          | 1.34E-05             | 6.72871            | 6.72871                      | T up vs N                              | 38.101  | 34.0394   | 14.2946    | 1         |
| cg07828612                    | GPR52;RABGAP1L             | 1.30E-05          | 1.30E-05             | 3.50238            | 3.50238                      | T up vs N                              | 38.319  | 14.7154   | 6.14438    | 1         |
| cg07830134                    | CACNA1H;CACNA1H            | 2.19E-05          | 2.19E-05             | 0.247427           | -4.04159                     | T down vs N                            | 34.958  | 18.2696   | 8.36189    | 1         |
| cg07830472                    | BAIAP2L1                   | 1.26E-05          | 1.26E-05             | 0.205432           | -4.8678                      | T down vs N                            | 38.485  | 23.4599   | 9.75331    | 1         |
| cg07830750                    | PRR25                      | 0.0007158         | 0.000715803          | 0.294293           | -3.39797                     | T down vs N                            | 17.426  | 14.0133   | 12.8668    | 1         |
| cg07831312                    | FAM188B                    | 0.00041182        | 0.000411822          | 0.30724            | -3.25479                     | T down vs N                            | 19.712  | 13.0443   | 10.5881    | 1         |
| cg07832337                    | ATP2C2;ATP2C2              | 0.00052574        | 0.000525737          | 7.91604            | 7.91604                      | T up vs N                              | 18.682  | 40.0901   | 34.3353    | 1         |
| cg07833068                    | ANKRD24                    | 8.55E-05          | 8.55E-05             | 0.259921           | -3.84733                     | T down vs N                            | 27.168  | 17.0036   | 10.0138    | 1         |
| cg07833262                    | EMX2OS                     | 3.87E-05          | 3.87E-05             | 0.16129            | -6.20003                     | T down vs N                            | 31.534  | 31.1799   | 15.8201    | 1         |
| cg07834322                    | SNORD115-13                | 0.00100561        | 0.00100561           | 0.322651           | -3.09932                     | T down vs N                            | 16.099  | 11.9847   | 11.9111    | 1         |
| cg07834743                    | ADAMTS16                   | 0.00598368        | 0.00598368           | 4.96487            | 4.96487                      | T up vs N                              | 10.027  | 24.049    | 38.3746    | 1         |
| cg07835051                    | RAX                        | 0.00039822        | 0.000398215          | 0.168129           | -5.94782                     | T down vs N                            | 19.856  | 29.7767   | 23.9944    | 1         |
| cg07836225                    | B3GALNT2                   | 1.73E-08          | 1.73E-08             | 0.232473           | -4.30157                     | T down vs N                            | 106.84  | 19.937    | 2.98571    | 1         |
| cg07837085                    | SLAMF7                     | 3.78E-05          | 3.78E-05             | 0.323764           | -3.08867                     | T down vs N                            | 31.668  | 11.9119   | 6.01845    | 1         |
| cg07837534                    | ARHGAP30;ARHGAP30          | 7.37E-05          | 7.37E-05             | 0.216469           | -4.61961                     | T down vs N                            | 27.954  | 21.9341   | 12.5543    | 1         |
| cg07838495                    | RPL26                      | 0.00015629        | 0.000156292          | 0.308414           | -3.2424                      | T down vs N                            | 24.13   | 12.9601   | 8.59364    | 1         |
| cg07839457                    | NLRCS                      | 4.04E-05          | 4.04E-05             | 0.330149           | -3.02894                     | T down vs N                            | 31.284  | 11.5029   | 5.88303    | 1         |
| cg07843419                    | C3P1                       | 5.38E-06          | 5.38E-06             | 0.1796             | -5.56794                     | T down vs N                            | 44.5    | 27.6131   | 9.92835    | 1         |
| cg07844977                    | SERPINB9                   | 4.98E-06          | 4.98E-06             | 8.90253            | 8.90253                      | T up vs N                              | 45.075  | 44.7708   | 15.892     | 1         |
| cg07846061                    | MLKL;MLKL                  | 0.00253531        | 0.00253531           | 0.324215           | -3.08437                     | T down vs N                            | 12.773  | 11.8825   | 14.8849    | 1         |
| cg07849581                    | TEC                        | 0.00028499        | 0.000284993          | 21.1519            | 21.1519                      | T up vs N                              | 21.326  | 87.2276   | 65.4427    | 1         |
| cg07850316                    | OR5M10;OR8U8               | 7.68E-06          | 7.68E-06             | 0.224763           | -4.44912                     | T down vs N                            | 41.909  | 20.8694   | 7.96745    | 1         |
| cg07851948                    | OR8K3                      | 6.65E-05          | 6.65E-05             | 0.199017           | -5.02469                     | T down vs N                            | 28.506  | 24.4098   | 13.7009    | 1         |
| cg07853063                    | INTS1                      | 0.0003576         | 0.000357596          | 0.332588           | -3.00672                     | T down vs N                            | 20.322  | 11.3506   | 8.93665    | 1         |
| cg07856138                    | SPN;SPN                    | 8.01E-06          | 8.01E-06             | 0.250246           | -3.99607                     | T down vs N                            | 41.616  | 17.9745   | 6.91068    | 1         |
| cg07857278                    | PPP1R13L;PPP1R13L          | 0.00350091        | 0.00350091           | 0.312572           | -3.19927                     | T down vs N                            | 11.704  | 12.6667   | 17.3164    | 1         |
| cg07857331                    | MRPS27                     | 1.37E-06          | 1.37E-06             | 0.241269           | -4.14475                     | T down vs N                            | 55.596  | 18.935    | 5.44931    | 1         |
| cg07858195                    | COL23A1                    | 0.0037869         | 0.0037869            | 0.094997           | -10.5267                     | T down vs N                            | 11.707  | 48.8443   | 62.585     | 1         |
| cg07858728                    | DMBT1;DMBT1;DMBT1          | 0.00042628        | 0.000426284          | 0.261778           | -3.82003                     | T down vs N                            | 19.564  | 16.8244   | 13.7594    | 1         |
| cg07861603                    | CCDC64B                    | 0.00051669        | 0.000516691          | 0.219153           | -4.56302                     | T down vs N                            | 18.754  | 21.5822   | 18.4131    | 1         |
| cg07862930                    | KCNJ16;KCNJ16;KCNJ16       | 0.00433233        | 0.00433233           | 0.29348            | -3.40738                     | T down vs N                            | 11.023  | 14.0768   | 20.4331    | 1         |
| cg07868599                    | CCDC64B                    | 0.00282794        | 0.00282794           | 0.283459           | -3.52785                     | T down vs N                            | 12.406  | 14.8859   | 19.1988    | 1         |
| cg07868917                    | GAPDHS                     | 0.00380275        | 0.00380275           | 0.248858           | -4.01836                     | T down vs N                            | 11.437  | 18.1191   | 25.3477    | 1         |
| cg07869256                    | MUCL1                      | 0.00057531        | 0.000575309          | 0.289786           | -3.45082                     | T down vs N                            | 18.31   | 14.3692   | 12.5565    | 1         |
| cg07869651                    | NHP2;NHP2                  | 0.00071111        | 0.000711108          | 0.329798           | -3.03216                     | T down vs N                            | 17.452  | 11.525    | 10.5661    | 1         |
| PCDHGA4;PCDHGA2;PCDHGB2;PCDHG |                            |                   |                      |                    |                              |                                        |         |           |            |           |
| A5;PCDHGA1;PCDHGB1;PCDHGA5;PC |                            |                   |                      |                    |                              |                                        |         |           |            |           |
| cg07870307                    | DHGA3                      | 0.00109115        | 0.00109115           | 8.29037            | 8.29037                      | T up vs N                              | 15.789  | 41.9007   | 42.4612    | 1         |
| cg07871059                    | ATP6V0D1;AGRP;AGRP         | 9.44E-08          | 9.44E-08             | 0.246486           | -4.05703                     | T down vs N                            | 83.557  | 18.3695   | 3.51752    | 1         |
| cg07871456                    | LUC7L3;LUC7L3              | 9.74E-05          | 9.74E-05             | 0.317553           | -3.14908                     | T down vs N                            | 26.492  | 12.3246   | 7.44342    | 1         |
| cg07877900                    | GPR114;GPR114              | 7.89E-06          | 7.89E-06             | 0.313658           | -3.18819                     | T down vs N                            | 41.723  | 12.5912   | 4.82846    | 1         |
| cg07879739                    | GALR3                      | 0.00062615        | 0.000626147          | 15.4639            | 15.4639                      | T up vs N                              | 17.964  | 70.2408   | 62.5606    | 1         |
| cg07884735                    | SDAD1                      | 1.25E-05          | 1.25E-05             | 0.310446           | -3.22117                     | T down vs N                            | 38.571  | 12.8157   | 5.31618    | 1         |
| cg07886100                    | EEPD1                      | 0.00014709        | 0.000147093          | 0.322235           | -3.10333                     | T down vs N                            | 24.425  | 12.0121   | 7.8688     | 1         |
| cg07886195                    | SPC24                      | 0.00581944        | 0.00581944           | 0.307944           | -3.24735                     | T down vs N                            | 10.111  | 12.9937   | 20.5614    | 1         |
| cg07886701                    | FABP9                      | 3.80E-06          | 3.80E-06             | 0.300531           | -3.32744                     | T down vs N                            | 47.126  | 13.5369   | 4.59594    | 1         |

| Probeset ID | UCSC_REFGENE_NAME                              | p-value<br>(Type) | p-value (T vs.<br>N) | Ratio (T<br>vs. N) | Fold-<br>Change (T<br>vs. N) | Fold-Change (T vs.<br>N) (Description) | F(Type) | SS (Type) | SS (Error) | F (Error) |
|-------------|------------------------------------------------|-------------------|----------------------|--------------------|------------------------------|----------------------------------------|---------|-----------|------------|-----------|
| cg07890553  | TMEM39A                                        | 2.60E-06          | 2.60E-06             | 0.107532           | -9.29957                     | T down vs N                            | 50.155  | 46.5756   | 14.858     | 1         |
| cg07890785  | FAM64A                                         | 2.12E-05          | 2.12E-05             | 0.193371           | -5.17141                     | T down vs N                            | 35.15   | 25.2879   | 11.5108    | 1         |
| cg07891179  | WIPF3                                          | 0.00011895        | 0.000118954          | 3.36549            | 3.36549                      | T up vs N                              | 25.476  | 13.7941   | 8.66326    | 1         |
| cg07891271  | CHSY1                                          | 0.00056025        | 0.000560248          | 0.320414           | -3.12096                     | T down vs N                            | 18.419  | 12.1326   | 10.5393    | 1         |
| cg07891737  | MIR519D;MIR517A                                | 1.40E-05          | 1.40E-05             | 0.29274            | -3.416                       | T down vs N                            | 37.817  | 14.1348   | 5.98039    | 1         |
| cg07892167  | R3HCC1                                         | 7.59E-05          | 7.59E-05             | 0.317497           | -3.14964                     | T down vs N                            | 27.794  | 12.3284   | 7.09698    | 1         |
| cg07893474  | C3orf43                                        | 2.32E-06          | 2.32E-06             | 0.164205           | -6.08996                     | T down vs N                            | 51.067  | 30.5707   | 9.57824    | 1         |
| cg07894717  | APITD1;CORT                                    | 0.00011491        | 0.000114906          | 0.280266           | -3.56804                     | T down vs N                            | 25.65   | 15.1547   | 9.45312    | 1         |
| cg07894822  | MYH16                                          | 0.00527847        | 0.00527847           | 0.331584           | -3.01583                     | T down vs N                            | 10.409  | 11.413    | 17.5441    | 1         |
| cg07895437  | ZBTB22;TAPBP;TAPBP;TAPBP;ZBTB22                | 0.00032889        | 0.000328892          | 4.56602            | 4.56602                      | T up vs N                              | 20.689  | 21.6009   | 16.7054    | 1         |
| cg07896832  | CSPP1;CSPP1;COP55                              | 0.00158455        | 0.00158455           | 0.187184           | -5.34233                     | T down vs N                            | 14.413  | 26.2987   | 29.1943    | 1         |
| cg07898446  | FAM50B                                         | 0.00285384        | 0.00285384           | 3.87512            | 3.87512                      | T up vs N                              | 12.375  | 17.1858   | 22.2194    | 1         |
| cg07898899  | S100A13;S100A13;S100A13;S100A1;S100A13;S100A13 | 1.69E-05          | 1.69E-05             | 11.4143            | 11.4143                      | T up vs N                              | 36.578  | 55.5279   | 24.2888    | 1         |
| cg07899634  | VPS52                                          | 0.00126385        | 0.00126385           | 0.324439           | -3.08225                     | T down vs N                            | 15.239  | 11.8679   | 12.4606    | 1         |
| cg07899983  | NAT88                                          | 3.66E-05          | 3.66E-05             | 0.24995            | -4.0008                      | T down vs N                            | 31.861  | 18.0052   | 9.04198    | 1         |
| cg07901130  | ELOVL2                                         | 0.00362143        | 0.00362143           | 0.296316           | -3.37478                     | T down vs N                            | 11.594  | 13.8569   | 19.1223    | 1         |
| cg07905627  | COG8                                           | 0.00088493        | 0.000884934          | 0.259968           | -3.84663                     | T down vs N                            | 16.591  | 16.999    | 16.3935    | 1         |
| cg07905748  | NIT2                                           | 4.99E-05          | 4.99E-05             | 0.279298           | -3.58041                     | T down vs N                            | 30.088  | 15.2372   | 8.10288    | 1         |
| cg07905944  | PAX6                                           | 6.35E-05          | 6.35E-05             | 13.4013            | 13.4013                      | T up vs N                              | 28.754  | 63.089    | 35.1057    | 1         |
| cg07905975  | DAXX;DAXX;DAXX;DAXX                            | 5.65E-05          | 5.65E-05             | 0.260692           | -3.83594                     | T down vs N                            | 29.398  | 16.9289   | 9.21358    | 1         |
| cg07909128  | SPRR1A                                         | 0.0002217         | 0.0002217            | 0.240897           | -4.15115                     | T down vs N                            | 22.472  | 18.9761   | 13.5109    | 1         |
| cg07909759  | C10orf82                                       | 0.00505984        | 0.00505984           | 8.26803            | 8.26803                      | T up vs N                              | 10.539  | 41.7938   | 63.4519    | 1         |
| cg07911140  | VGLL1;MIR934                                   | 0.00264061        | 0.00264061           | 0.332242           | -3.00986                     | T down vs N                            | 12.635  | 11.3721   | 14.4004    | 1         |
| cg07912922  | PHACTR1                                        | 1.32E-06          | 1.32E-06             | 0.120781           | -8.27942                     | T down vs N                            | 55.878  | 41.8484   | 11.9828    | 1         |
| cg07914250  | WDR66                                          | 2.55E-06          | 2.55E-06             | 0.293457           | -3.40766                     | T down vs N                            | 50.313  | 14.0786   | 4.47714    | 1         |
| cg07915206  | AVEN;CHRM5                                     | 0.0001661         | 0.000166096          | 0.267974           | -3.7317                      | T down vs N                            | 23.836  | 16.2421   | 10.9027    | 1         |
| cg07915976  | HOXC4;HOXC5;HOXC6                              | 0.00018338        | 0.00018338           | 0.290949           | -3.43703                     | T down vs N                            | 23.363  | 14.2764   | 9.77728    | 1         |
| cg07920195  | PSG11;PSG11;PSG11;PSG11;PSG11;PSG11            | 5.76E-05          | 5.76E-05             | 0.246018           | -4.06475                     | T down vs N                            | 30.596  | 17.3359   | 8.49904    | 1         |
| cg07921314  | NRF1                                           | 0.00010892        | 0.000108921          | 0.220225           | -4.5408                      | T down vs N                            | 25.921  | 21.4437   | 13.2364    | 1         |
| cg07921384  | SPEG                                           | 0.00344265        | 0.00344265           | 12.3621            | 12.3621                      | T up vs N                              | 11.758  | 59.2259   | 80.5915    |           |

| Probeset ID                         | UCSC_REFGENE_NAME           | p-value<br>(Type) | p-value (T vs.<br>N) | Ratio (T<br>vs. N) | Fold-<br>Change (T<br>vs. N) | Fold-Change (T vs.<br>N) (Description) | F(Type) | SS (Type) | SS (Error) | F (Error) |
|-------------------------------------|-----------------------------|-------------------|----------------------|--------------------|------------------------------|----------------------------------------|---------|-----------|------------|-----------|
| cg07978099                          | OSGIN1;OSGIN1;OSGIN1;OSGIN1 | 0.00033376        | 0.000333761          | 0.319729           | -3.12765                     | T down vs N                            | 20.624  | 12.1783   | 9.44782    | 1         |
| cg07979316                          | TP53I3;TP53I3               | 0.00093306        | 0.000933064          | 0.33219            | -3.01033                     | T down vs N                            | 16.386  | 11.3753   | 11.1073    | 1         |
| cg07979566                          | SMOC2;SMOC2                 | 3.79E-05          | 3.79E-05             | 0.328346           | -3.04557                     | T down vs N                            | 31.656  | 11.6169   | 5.87165    | 1         |
| cg07979747                          | DDR1;DDR1;DDR1              | 0.00200288        | 0.00200288           | 3.19205            | 3.19205                      | T up vs N                              | 13.583  | 12.6175   | 14.863     | 1         |
| cg07982082                          | SIPA1;SIPA1                 | 2.26E-06          | 2.26E-06             | 4.22568            | 4.22568                      | T up vs N                              | 51.306  | 19.4535   | 6.06665    | 1         |
| cg07982869                          | OR2C1;OR2C1                 | 0.00731194        | 0.00731194           | 0.262047           | -3.81611                     | T down vs N                            | 9.4305  | 16.7986   | 28.501     | 1         |
| cg07984286                          | IRX3                        | 3.61E-05          | 3.61E-05             | 5.41643            | 5.41643                      | T up vs N                              | 31.94   | 26.7329   | 13.3917    | 1         |
| cg07984365                          | WDR24                       | 0.00111213        | 0.00111213           | 0.270984           | -3.69026                     | T down vs N                            | 15.717  | 15.9678   | 16.2554    | 1         |
| cg07986058                          | ATP10A                      | 2.09E-05          | 2.09E-05             | 0.164975           | -6.06151                     | T down vs N                            | 35.237  | 30.4124   | 13.8094    | 1         |
| cg07987051                          | NAGPA                       | 4.31E-05          | 4.31E-05             | 0.153109           | -6.5313                      | T down vs N                            | 30.91   | 32.9843   | 17.074     | 1         |
| cg07987796                          | KLK1                        | 0.00158032        | 0.00158032           | 0.227296           | -4.39955                     | T down vs N                            | 14.423  | 20.5573   | 22.8055    | 1         |
| cg07993003                          | NLRP7;NLRP7;NLRP7           | 0.00037939        | 0.00037939           | 0.302465           | -3.30617                     | T down vs N                            | 20.065  | 13.3928   | 10.6797    | 1         |
| cg07998072                          | TMCS;TMCS                   | 6.20E-06          | 6.20E-06             | 0.19962            | -5.00951                     | T down vs N                            | 43.448  | 24.3184   | 8.95537    | 1         |
| cg07998554                          | EMR3                        | 0.00143307        | 0.00143307           | 0.248259           | -4.02805                     | T down vs N                            | 14.777  | 18.1819   | 19.6867    | 1         |
| cg08002861                          | RG9MTD2;RG9MTD2;RG9MTD2     | 0.00136255        | 0.00136255           | 0.305252           | -3.27599                     | T down vs N                            | 14.962  | 13.1882   | 14.1034    | 1         |
| cg08003956                          | FLJ36000                    | 0.00021655        | 0.000216552          | 0.287803           | -3.4746                      | T down vs N                            | 22.581  | 14.529    | 10.2946    | 1         |
| cg08006727                          | RNF183                      | 2.33E-05          | 2.33E-05             | 0.294183           | -3.39925                     | T down vs N                            | 34.574  | 14.0219   | 6.48897    | 1         |
| cg08007074                          | WFDCl                       | 1.64E-05          | 1.64E-05             | 5.17932            | 5.17932                      | T up vs N                              | 36.779  | 25.335    | 11.0214    | 1         |
| cg08009265                          | SPRR2B                      | 2.52E-06          | 2.52E-06             | 0.147197           | -6.79364                     | T down vs N                            | 50.382  | 34.3832   | 10.9192    | 1         |
| cg08009711                          | C2CD2;C2CD2                 | 0.0009218         | 0.000921798          | 0.291616           | -3.42917                     | T down vs N                            | 16.433  | 14.2235   | 13.8488    | 1         |
| cg08014964                          | MYH4                        | 2.34E-06          | 2.34E-06             | 0.173713           | -5.75663                     | T down vs N                            | 50.991  | 28.6954   | 9.004      | 1         |
| cg08015496                          | NCSN;COPA;COPA              | 3.45E-06          | 3.45E-06             | 0.190107           | -5.2602                      | T down vs N                            | 47.878  | 25.8146   | 8.62673    | 1         |
| cg08019151                          | SCN10A                      | 4.32E-05          | 4.32E-05             | 0.146489           | -6.82646                     | T down vs N                            | 30.895  | 34.5564   | 17.8963    | 1         |
| cg08019798                          | SNRG                        | 0.00160647        | 0.00160647           | 0.239129           | -3.03833                     | T down vs N                            | 14.364  | 11.5672   | 12.885     | 1         |
| cg08020395                          | C16orf92;C16orf92           | 2.36E-06          | 2.36E-06             | 0.279646           | -3.57594                     | T down vs N                            | 50.93   | 15.2075   | 4.77752    | 1         |
| cg08021299                          | HEPH;HEPH;HEPH              | 0.00613171        | 0.00613171           | 0.194997           | -5.12828                     | T down vs N                            | 9.9535  | 25.0308   | 40.2366    | 1         |
| cg08021653                          | R3HDM1                      | 8.32E-06          | 8.32E-06             | 0.320672           | -3.11845                     | T down vs N                            | 41.347  | 12.1155   | 4.68835    | 1         |
| cg08021727                          | ADCY9                       | 9.90E-05          | 9.90E-05             | 0.280837           | -3.56078                     | T down vs N                            | 26.407  | 15.1062   | 9.15304    | 1         |
| cg08022044                          | DSCAM1                      | 0.00158162        | 0.00158162           | 3.3581             | 3.3581                       | T up vs N                              | 14.42   | 13.7442   | 15.2504    | 1         |
| cg08024029                          | VWA5B1                      | 0.00039234        | 0.00039234           | 3.39095            | 3.39095                      | T up vs N                              | 19.92   | 13.9659   | 11.2177    | 1         |
| cg08025019                          | TTC32                       | 0.00080659        | 0.000806588          | 0.292725           | -3.41617                     | T down vs N                            | 16.953  | 14.136    | 13.3414    | 1         |
| cg08025415                          | TLE2                        | 3.27E-06          | 3.27E-06             | 0.137714           | -7.26144                     | T down vs N                            | 48.296  | 36.8148   | 12.1964    | 1         |
| cg08026772                          | PRIM2                       | 0.00063742        | 0.000637416          | 0.291752           | -3.42757                     | T down vs N                            | 17.892  | 14.2128   | 12.7099    | 1         |
| cg08026852                          | RFX1                        | 0.00015094        | 0.000150944          | 0.274596           | -3.64171                     | T down vs N                            | 24.299  | 15.6456   | 10.3021    | 1         |
| cg08028452                          | CACNA1D;CACNA1D;CACNA1D     | 5.61E-06          | 5.61E-06             | 0.205179           | -4.87379                     | T down vs N                            | 44.188  | 23.4964   | 8.5079     | 1         |
| cg08029014                          | WDFY2                       | 5.53E-05          | 5.53E-05             | 0.233717           | -4.27869                     | T down vs N                            | 29.513  | 19.7915   | 10.7298    | 1         |
| cg08030373                          | RAD54L2                     | 1.60E-05          | 1.60E-05             | 0.238239           | -4.19747                     | T down vs N                            | 36.957  | 19.2731   | 8.3441     | 1         |
| cg08030625                          | ANKS4B                      | 0.00416721        | 0.00416721           | 0.318485           | -3.13987                     | T down vs N                            | 11.146  | 12.2617   | 17.6024    | 1         |
| RAB34;RAB34;RAB34;RAB34;RAB34;RAB34 |                             |                   |                      |                    |                              |                                        |         |           |            |           |
| cg08032476                          | AB34;RAB34                  | 0.00376413        | 0.00376413           | 3.09359            | 3.09359                      | T up vs N                              | 11.47   | 11.9455   | 16.6634    | 1         |
| cg08032924                          | CMTM2                       | 0.00096772        | 0.00096772           | 9.23295            | 9.23295                      | T up vs N                              | 16.246  | 46.2758   | 45.5756    | 1         |
| cg08033130                          | CXCR6;FYCO1                 | 1.34E-05          | 1.34E-05             | 0.278611           | -3.58924                     | T down vs N                            | 38.111  | 15.2962   | 6.42175    | 1         |
| cg08034505                          | GPR125                      | 0.00173949        | 0.00173949           | 0.296089           | -3.37736                     | T down vs N                            | 14.079  | 13.8743   | 15.7669    | 1         |
| cg08035195                          | RBMS1;RBMS1                 | 0.00062828        | 0.000628282          | 0.259346           | -3.85586                     | T down vs N                            | 17.95   | 17.0595   | 15.2059    | 1         |
| cg08036289                          | C15orf23;C15orf23;C15orf23  | 0.0008689         | 0.000868896          | 0.309763           | -3.22827                     | T down vs N                            | 16.662  | 12.864    | 12.3529    | 1         |
| cg08037664                          | F8;F8A3;F8A1;F8;F8A2        | 4.47E-06          | 4.47E-06             | 0.260523           | -3.83844                     | T down vs N                            | 45.884  | 16.9453   | 5.90894    | 1         |
| cg08039854                          | HRH1;HRH1;HRH1              | 0.00051946        | 0.000519458          | 0.201672           | -4.95854                     | T down vs N                            | 18.732  | 24.0107   | 20.5092    | 1         |
| cg08042258                          | NR4A3;NR4A3;NR4A3;NR4A3     | 1.87E-06          | 1.87E-06             | 7.95953            | 7.95953                      | T up vs N                              | 52.859  | 40.3027   | 12.1992    | 1         |
| cg08042538                          | FAM110A;FAM110A             | 7.52E-06          | 7.52E-06             | 7.65481            | 7.65481                      | T up vs N                              | 42.058  | 38.8001   | 14.7607    | 1         |
| cg08046030                          | RNGTT                       | 0.00035403        | 0.000354027          | 0.294486           | -3.39575                     | T down vs N                            | 20.366  | 13.9983   | 10.9976    | 1         |
| cg08047086                          | CBFA2T3                     | 0.00023377        | 0.000233774          | 0.331608           | -3.01561                     | T down vs N                            | 22.227  | 11.4115   | 8.2145     | 1         |
| cg08047252                          | IAH1                        | 0.00013754        | 0.000137544          | 5.5017             | 5.5017                       | T up vs N                              | 24.754  | 27.2295   | 17.6       | 1         |
| cg08047457                          | RASSF1;RASSF1               | 3.35E-05          | 3.35E-05             | 3.22805            | 3.22805                      | T up vs N                              | 32.38   | 12.8626   | 6.35587    | 1         |
| cg08048137                          | KREMEN1;KREMEN1             | 0.00023301        | 0.000233008          | 7.63678            | 7.63678                      | T up vs N                              | 22.242  | 38.7102   | 27.8464    | 1         |
| cg08050656                          | SERPINB11                   | 5.10E-08          | 5.10E-08             | 0.130202           | -7.68035                     | T down vs N                            | 91.44   | 38.9272   | 6.81141    | 1         |
| cg08054070                          | HRNBP3                      | 0.00343764        | 0.00343764           | 0.271361           | -3.68512                     | T down vs N                            | 11.763  | 15.9338   | 21.6731    | 1         |
| cg08055131                          | FLT3                        | 0.00058739        | 0.000587385          | 3.32741            | 3.32741                      | T up vs N                              | 18.225  | 13.5366   | 11.8842    | 1         |
| cg08059845                          | FCGRT;FCGRT;FCGRT           | 2.47E-05          | 2.47E-05             | 0.204128           | -4.89889                     | T down vs N                            | 35.907  | 22.2579   | 9.29806    | 1         |
| cg08060195                          | TRIM10;TRIM10               | 0.00535946        | 0.00535946           | 0.327971           | -3.04905                     | T down vs N                            | 10.362  | 11.6407   | 17.9746    | 1         |
| cg08060645                          | CDC40                       | 0.00048861        | 0.000488606          | 0.322618           | -3.09964                     | T down vs N                            | 18.987  | 11.9869   | 10.101     | 1         |
| cg08060810                          | OR5D18                      | 9.69E-05          | 9.69E-05             | 0.195895           | -5.10476                     | T down vs N                            | 26.52   | 24.8903   | 15.0166    | 1         |
| cg08066035                          | F2RL3                       | 1.15E-05          | 1.15E-05             | 0.114778           | -8.71247                     | T down vs N                            | 39.143  | 43.8914   | 17.9412    | 1         |
| cg08070147                          | SCML1;SCML1;SCML1;SCML1     | 0.00217543        | 0.00217543           | 0.300045           | -3.33283                     | T down vs N                            | 13.296  | 13.5733   | 16.3339    | 1         |
| cg08072356                          | ORAN5                       | 0.00058991        | 0.000589908          | 0.250369           | -3.9941                      | T down vs N                            | 18.207  | 17.9617   | 15.7843    | 1         |
| cg08072716                          | GPR62                       | 2.08E-06          | 2.08E-06             | 4.231              | 4.231                        | T up vs N                              | 51.971  | 19.4875   | 5.99949    | 1         |
| cg08072933                          | PPP1R2P1                    | 8.53E-06          | 8.53E-06             | 0.278018           | -3.59689                     | T down vs N                            | 41.17   | 15.3472   | 5.96436    | 1         |
| cg08073667                          | SNX29                       | 0.00049132        | 0.000491319          | 0.108048           | -9.25512                     | T down vs N                            | 18.964  | 46.3757   | 39.1274    | 1         |
| cg08074820                          | EBF4                        | 2.66E-05          | 2.66E-05             | 8.11394            | 8.11394                      | T up vs N                              | 33.758  | 41.0528   | 19.4577    | 1         |
| cg08076115                          | TRIM40                      | 9.53E-05          | 9.53E-05             | 0.317227           | -3.15232                     | T down vs N                            | 26.606  | 12.3467   | 7.42486    | 1         |
| cg08076266                          | TMEM37                      | 4.48E-05          | 4.48E-05             | 5.99844            | 5.99844                      | T up vs N                              | 30.691  | 30.0604   | 15.6714    | 1         |
| cg08076955                          | HOXB1                       | 0.00018577        | 0.000185767          | 4.43203            | 4.43203                      | T up vs N                              | 23.301  | 20.762    | 14.2564    | 1         |
| cg08077617                          | CES1;CES1;CES1              | 3.66E-06          | 3.66E-06             | 0.225111           | -4.44226                     | T down vs N                            | 47.426  | 20.8263   | 7.02606    | 1         |

| Probeset ID | UCSC_REFGENE_NAME                  | p-value<br>(Type) | p-value (T vs.<br>N) | Ratio (T<br>vs. N) | Fold-<br>Change (T<br>vs. N) | Fold-Change (T vs.<br>N) (Description) | F(Type) | SS (Type) | SS (Error) | F (Error) |
|-------------|------------------------------------|-------------------|----------------------|--------------------|------------------------------|----------------------------------------|---------|-----------|------------|-----------|
| cg08077673  | MEST                               | 6.43E-06          | 6.43E-06             | 14.7445            | 14.7445                      | T up vs N                              | 43.185  | 67.8183   | 25.1263    | 1         |
| cg08079166  | MAP2K5;MAP2K5                      | 0.00092689        | 0.000926893          | 0.206472           | -4.84328                     | T down vs N                            | 16.412  | 23.3105   | 22.7257    | 1         |
| cg08079806  | EFEMP2                             | 0.00089647        | 0.000896472          | 3.62953            | 3.62953                      | T up vs N                              | 16.541  | 15.5646   | 15.0557    | 1         |
| cg08080145  | RAB37                              | 0.0002701         | 0.000270104          | 0.130064           | -7.68855                     | T down vs N                            | 21.568  | 38.968    | 28.9081    | 1         |
| cg08088161  | HSPBP1;HSPBP1                      | 0.00162989        | 0.00162989           | 3.3756             | 3.3756                       | T up vs N                              | 14.312  | 13.8624   | 15.4976    | 1         |
| cg08088390  | DEFB125                            | 0.00015023        | 0.000150233          | 0.250235           | -3.99624                     | T down vs N                            | 24.322  | 17.9756   | 11.8252    | 1         |
| cg08088989  | ZNF280A;ZNF280A                    | 0.0002051         | 0.000205096          | 0.308353           | -3.24303                     | T down vs N                            | 22.835  | 12.9644   | 9.08395    | 1         |
| cg08089354  | RPL39;SNORA69                      | 5.90E-06          | 5.90E-06             | 0.265025           | -3.77323                     | T down vs N                            | 43.811  | 16.5163   | 6.03189    | 1         |
| cg08091601  | EIF3L                              | 6.24E-05          | 6.24E-05             | 0.171086           | -5.84501                     | T down vs N                            | 28.849  | 29.1971   | 16.1931    | 1         |
| cg08091707  | CFD                                | 2.06E-06          | 2.06E-06             | 0.184384           | -5.42348                     | T down vs N                            | 52.073  | 26.774    | 8.22661    | 1         |
| cg08092837  | KRT83                              | 4.51E-06          | 4.51E-06             | 0.261305           | -3.82695                     | T down vs N                            | 45.82   | 16.8698   | 5.89086    | 1         |
| cg08098111  | FLT25363                           | 7.81E-05          | 7.81E-05             | 0.330118           | -3.02922                     | T down vs N                            | 27.643  | 11.5049   | 6.65923    | 1         |
| cg08098964  | KIAA1543;KIAA1543                  | 0.00138998        | 0.00138998           | 0.311313           | -3.2122                      | T down vs N                            | 14.889  | 12.7547   | 13.7069    | 1         |
| cg08099626  | OR3A4                              | 0.00095071        | 0.000950706          | 0.256969           | -3.89153                     | T down vs N                            | 16.314  | 17.2931   | 16.9603    | 1         |
| cg08101036  | HOXA3;HOXA3;HOXA3                  | 0.00508561        | 0.00508561           | 3.6406             | 3.6406                       | T up vs N                              | 10.523  | 15.6382   | 23.7774    | 1         |
| cg08101739  | LCE6A                              | 0.00119249        | 0.00119249           | 0.220602           | -4.93578                     | T down vs N                            | 15.455  | 23.8729   | 24.7145    | 1         |
| cg08102294  | IQSEC1                             | 6.33E-06          | 6.33E-06             | 0.254349           | -3.93161                     | T down vs N                            | 43.303  | 17.5549   | 6.48642    | 1         |
| cg08105217  | SYNGAP1                            | 2.18E-06          | 2.18E-06             | 0.258927           | -3.86209                     | T down vs N                            | 54.925  | 16.0945   | 4.3954     | 1         |
| cg08105378  | HOMER3;HOMER3;HOMER3;HOMER3        | 0.0030932         | 0.0030932            | 0.31822            | -3.14248                     | T down vs N                            | 12.109  | 12.2795   | 16.226     | 1         |
| cg08105396  | S100A2                             | 0.00721713        | 0.00721713           | 0.250063           | -3.99899                     | T down vs N                            | 9.4688  | 17.9934   | 30.4045    | 1         |
| cg08106339  | ORS1A2                             | 6.73E-05          | 6.73E-05             | 0.173257           | -5.77178                     | T down vs N                            | 28.439  | 28.7817   | 16.1926    | 1         |
| cg08109646  | ZNF683;ZNF683                      | 2.02E-05          | 2.02E-05             | 0.299174           | -3.34254                     | T down vs N                            | 35.447  | 13.639    | 6.15635    | 1         |
| cg08110272  | CMKLR1;CMKLR1;CMKLR1               | 0.00143637        | 0.00143637           | 0.288731           | -3.46343                     | T down vs N                            | 14.769  | 14.454    | 15.6591    | 1         |
| cg08111960  | MS4A3;MS4A3;MS4A3                  | 0.00088923        | 0.000889226          | 0.26113            | -3.8295                      | T down vs N                            | 16.572  | 16.8866   | 16.3036    | 1         |
| cg08114265  | FYN;FYN                            | 0.00014973        | 0.000149727          | 0.312591           | -3.19906                     | T down vs N                            | 24.338  | 12.6653   | 8.32621    | 1         |
| cg08115682  | KCNA5                              | 1.43E-06          | 1.43E-06             | 5.28035            | 5.28035                      | T up vs N                              | 55.203  | 25.9337   | 7.51663    | 1         |
| cg08116137  | NAT8;ALMS1P                        | 4.75E-05          | 4.75E-05             | 0.227286           | -4.39974                     | T down vs N                            | 30.368  | 20.5585   | 10.8318    | 1         |
| cg08116408  | TRIM40                             | 3.90E-05          | 3.90E-05             | 0.271054           | -3.6893                      | T down vs N                            | 31.489  | 15.9615   | 8.11037    | 1         |
| cg08116775  | ZFAT                               | 0.00012299        | 0.000122991          | 0.318088           | -3.14378                     | T down vs N                            | 25.309  | 12.2884   | 7.76856    | 1         |
| cg08116792  | PRHOXNB                            | 3.68E-06          | 3.68E-06             | 0.202539           | -4.93733                     | T down vs N                            | 47.375  | 23.8823   | 8.06573    | 1         |
| cg08122234  | RNASE1;RNASE1;RNASE1;RNASE1        | 0.00609384        | 0.00609384           | 3.50314            | 3.50314                      | T up vs N                              | 9.9721  | 14.7204   | 23.6186    | 1         |
| cg08123045  | MEF2D                              | 0.00502616        | 0.00502616           | 3.10416            | 3.10416                      | T up vs N                              | 10.559  | 12.0178   | 18.2099    | 1         |
| cg08123207  | PRRT1                              | 3.27E-05          | 3.27E-05             | 5.13483            | 5.13483                      | T up vs N                              | 32.516  | 25.0699   | 12.3361    | 1         |
| cg08124030  | TM4SF1                             | 0.00019072        | 0.000190721          | 0.123703           | -8.08386                     | T down vs N                            | 23.177  | 40.9072   | 28.2403    | 1         |
| cg08125539  | IGF2BP1;IGF2BP1                    | 3.52E-06          | 3.52E-06             | 0.085574           | -11.6858                     | T down vs N                            | 47.715  | 56.6055   | 18.9813    | 1         |
| cg08128768  | DAB2IP                             | 8.25E-05          | 8.25E-05             | 0.15358            | -6.51128                     | T down vs N                            | 27.356  | 32.8765   | 19.2288    | 1         |
| cg08129331  | RPTOR;RPTOR                        | 0.0001314         | 0.0001314            | 0.131837           | -7.58512                     | T down vs N                            | 24.98   | 38.4522   | 24.6292    | 1         |
| cg08129658  | KIR3DL1                            | 2.78E-05          | 2.78E-05             | 0.17865            | -5.59754                     | T down vs N                            | 33.479  | 27.7839   | 13.2783    | 1         |
| cg08130275  | FNDC3B;FNDC3B                      | 8.33E-05          | 8.33E-05             | 0.306584           | -3.26175                     | T down vs N                            | 27.305  | 13.0916   | 7.67132    | 1         |
| cg08133228  | SLC39A7;SLC39A7                    | 5.25E-05          | 5.25E-05             | 0.211344           | -4.73163                     | T down vs N                            | 29.802  | 22.6263   | 12.1477    | 1         |
| cg08134678  | ARHGAP9;ARHGAP9;ARHGAP9            | 0.00016848        | 0.00016848           | 0.220407           | -4.53706                     | T down vs N                            | 23.767  | 21.4203   | 14.42      | 1         |
| cg08138586  | PARD3B;PARD3B;PARD3B               | 0.00236845        | 0.00236845           | 0.327361           | -3.05473                     | T down vs N                            | 13.004  | 11.6796   | 14.3704    | 1         |
| cg08139234  | EPB41;EPB41;EPB41;EPB41;EPB41      | 0.00305342        | 0.00305342           | 0.30958            | -3.23019                     | T down vs N                            | 12.151  | 12.8771   | 16.9558    | 1         |
| cg08139247  | B41                                | 0.00178386        | 0.00178386           | 3.01587            | 3.01587                      | T up vs N                              | 13.99   | 11.4133   | 13.0532    | 1         |
| cg08140558  | CLEC14A;CLEC14A                    | 2.90E-05          | 2.90E-05             | 0.253752           | -3.94086                     | T down vs N                            | 33.223  | 17.6153   | 8.48348    | 1         |
| cg08141395  | MAM1L2                             | 0.00523612        | 0.00523612           | 0.226159           | -4.42167                     | T down vs N                            | 10.433  | 20.6967   | 31.7395    | 1         |
| cg08141722  | OR2AT4                             | 0.00527264        | 0.00527264           | 0.272641           | -3.66783                     | T down vs N                            | 10.412  | 15.8191   | 24.3091    | 1         |
| cg08141744  | SRPX2                              | 0.00144253        | 0.00144253           | 0.286235           | -3.49364                     | T down vs N                            | 14.753  | 14.6567   | 15.8955    | 1         |
| cg08143875  | F10                                | 0.00047617        | 0.000476166          | 3.63512            | 3.63512                      | T up vs N                              | 19.096  | 15.6017   | 13.0726    | 1         |
| cg08144406  | COBL                               | 5.77E-05          | 5.77E-05             | 0.216212           | -4.62509                     | T down vs N                            | 29.277  | 21.9682   | 12.0055    | 1         |
| cg08151514  | LOC642006                          | 8.64E-05          | 8.64E-05             | 0.200437           | -4.9891                      | T down vs N                            | 27.114  | 24.1953   | 14.2776    | 1         |
| cg08151612  | SULT2B1;SULT2B1                    | 0.00024874        | 0.000248742          | 0.220459           | -4.53599                     | T down vs N                            | 21.942  | 21.4136   | 15.6144    | 1         |
| cg08152198  | C21orf29;KRTAP12-2                 | 0.00106731        | 0.00106731           | 0.237248           | -4.21501                     | T down vs N                            | 15.872  | 19.3853   | 19.5412    | 1         |
| cg08152263  | MCM5                               | 4.39E-07          | 4.39E-07             | 0.142703           | -7.00757                     | T down vs N                            | 66.336  | 35.505    | 8.56368    | 1         |
| cg08154437  | CPAMD8                             | 2.46E-05          | 2.46E-05             | 38.1973            | 38.1973                      | T up vs N                              | 34.239  | 124.286   | 58.079     | 1         |
| cg08155109  | GALNTL6                            | 1.53E-07          | 1.53E-07             | 0.205112           | -4.87539                     | T down vs N                            | 77.753  | 23.5061   | 4.83709    | 1         |
| cg08155347  | IL17C                              | 0.00010416        | 0.000104157          | 0.305269           | -3.2758                      | T down vs N                            | 26.149  | 13.1869   | 8.06896    | 1         |
| cg08156531  | GFAP;GFAP                          | 1.46E-05          | 1.46E-05             | 0.262236           | -3.81335                     | T down vs N                            | 37.524  | 16.7805   | 7.15512    | 1         |
| cg08158976  | MRPL55;MRPL55;MRPL55;MRPL55;MRPL55 | 0.00318644        | 0.00318644           | 0.270993           | -3.69014                     | T down vs N                            | 12.011  | 15.967    | 21.2702    | 1         |
| cg08160063  | A2BP1;A2BP1;A2BP1;A2BP1;A2BP1      | 3.67E-07          | 3.67E-07             | 0.157708           | -6.34082                     | T down vs N                            | 68.172  | 31.9521   | 7.49915    | 1         |
| cg08160331  | KLHL35                             | 0.00256507        | 0.00256507           | 4.52068            | 4.52068                      | T up vs N                              | 12.733  | 21.318    | 26.7873    | 1         |
| cg08162124  | ATP11A;ATP11A                      | 0.00426699        | 0.00426699           | 0.190662           | -5.24489                     | T down vs N                            | 11.071  | 25.7241   | 37.178     | 1         |
| cg08162389  | C1orf123                           | 0.00017754        | 0.000177536          | 0.184922           | -5.40769                     | T down vs N                            | 23.517  | 26.6818   | 18.1533    | 1         |
| cg08162948  | BTNL2                              | 0.00063923        | 0.000639232          | 0.248413           | -4.02555                     | T down vs N                            | 17.88   | 18.1657   | 16.2553    | 1         |
| cg08163798  | CORIN                              | 5.75E-06          | 5.75E-06             | 0.144229           | -6.93341                     | T down vs N                            | 44.002  | 35.118    | 12.7697    | 1         |
| cg08164233  | RFXAP                              | 0.00023244        | 0.000232442          | 0.237596           | -4.20883                     | T down vs N                            | 22.253  | 19.3458   | 13.9095    | 1         |
| cg08164294  | HOXA3;HOXA3;HOXA3                  | 4.86E-05          | 4.86E-05             | 5.48174            | 5.48174                      | T up vs N                              | 30.23   | 27.1135   | 14.3506    | 1         |

| Probeset ID                                     | UCSC_REFGENE_NAME                                           | p-value<br>(Type) | p-value (T vs.<br>N) | Ratio (T<br>vs. N) | Fold-<br>Change (T<br>vs. N) | Fold-Change (T vs.<br>N) (Description) | F(Type) | SS (Type) | SS (Error) | F (Error) |
|-------------------------------------------------|-------------------------------------------------------------|-------------------|----------------------|--------------------|------------------------------|----------------------------------------|---------|-----------|------------|-----------|
| cg08165083                                      | PEX14                                                       | 0.00014988        | 0.000149876          | 0.311444           | -3.21086                     | T down vs N                            | 24.333  | 12.7456   | 8.38064    | 1         |
| cg08166362                                      | C3orf37;C3orf37                                             | 0.00472286        | 0.00472286           | 0.304267           | -3.28659                     | T down vs N                            | 10.752  | 13.2601   | 19.7316    | 1         |
| cg08166720                                      | ZZEF1                                                       | 0.00608685        | 0.00608685           | 0.314891           | -3.1757                      | T down vs N                            | 9.9755  | 12.5061   | 20.0589    | 1         |
| cg08166767                                      | LCE2A                                                       | 0.00104147        | 0.00104147           | 0.253197           | -3.94949                     | T down vs N                            | 15.965  | 17.6715   | 17.7099    | 1         |
| cg08167951                                      | PON3                                                        | 7.37E-05          | 7.37E-05             | 7.0045             | 7.0045                       | T up vs N                              | 27.951  | 35.489    | 20.3147    | 1         |
| cg08170583                                      | DOCK5                                                       | 0.00024609        | 0.000246091          | 0.264649           | -3.77859                     | T down vs N                            | 21.991  | 16.5517   | 12.0423    | 1         |
| cg08170787                                      | RUSC1;C1orf104;RUSC1                                        | 5.16E-05          | 5.16E-05             | 3.4653             | 3.4653                       | T up vs N                              | 29.902  | 14.4665   | 7.7409     | 1         |
| cg08171142                                      | GCM1                                                        | 0.00108187        | 0.00108187           | 0.277336           | -3.60573                     | T down vs N                            | 15.821  | 15.4061   | 15.5803    | 1         |
| cg08171351                                      | CECR6;CECR6                                                 | 0.0016336         | 0.0016336            | 6.43866            | 6.43866                      | T up vs N                              | 14.304  | 32.4841   | 36.3368    | 1         |
| cg08173692                                      | PRR18                                                       | 0.00252623        | 0.00252623           | 18.3539            | 18.3539                      | T up vs N                              | 12.785  | 79.305    | 99.2492    | 1         |
| cg08177015                                      | COMP                                                        | 5.41E-06          | 5.41E-06             | 0.202599           | -4.93585                     | T down vs N                            | 44.451  | 23.8733   | 8.59317    | 1         |
| cg08177833                                      | CYBA                                                        | 1.40E-05          | 1.40E-05             | 14.5886            | 14.5886                      | T up vs N                              | 37.801  | 67.2837   | 28.4788    | 1         |
| cg08180025                                      | RNF216;RNF216                                               | 0.00016385        | 0.000163849          | 0.32272            | -3.09866                     | T down vs N                            | 23.901  | 11.9802   | 8.01975    | 1         |
| cg08180572                                      | SPNS1;SPNS1;SPNS1;SPNS1;SPNS1                               | 0.00014993        | 0.000149932          | 0.219406           | -4.55776                     | T down vs N                            | 24.332  | 21.5494   | 14.1705    | 1         |
| cg08181642                                      | SLC29A2                                                     | 0.00015137        | 0.000151369          | 0.297151           | -3.36529                     | T down vs N                            | 24.285  | 13.7928   | 9.08724    | 1         |
| cg08182193                                      | CRIP2                                                       | 0.0004022         | 0.000402195          | 0.310871           | -3.21677                     | T down vs N                            | 19.813  | 12.7858   | 10.3252    | 1         |
| cg08185345                                      | EFNA3                                                       | 0.00145984        | 0.00145984           | 3.13596            | 3.13596                      | T up vs N                              | 14.71   | 12.235    | 13.3083    | 1         |
| cg08185798                                      | ALX1                                                        | 1.78E-05          | 1.78E-05             | 0.183369           | -5.45348                     | T down vs N                            | 36.242  | 26.9491   | 11.8975    | 1         |
| cg08187246                                      | KCNJ9                                                       | 1.28E-07          | 1.28E-07             | 4.10875            | 4.10875                      | T up vs N                              | 79.853  | 18.7033   | 3.74757    | 1         |
| cg08188069                                      | SDR16C6                                                     | 2.09E-05          | 2.09E-05             | 0.311939           | -3.20576                     | T down vs N                            | 35.231  | 12.7109   | 5.77251    | 1         |
| cg08188318                                      | ANKS1A                                                      | 1.25E-05          | 1.25E-05             | 0.166971           | -5.98905                     | T down vs N                            | 38.56   | 30.0079   | 12.4513    | 1         |
| cg08188779                                      | B2M                                                         | 0.00010525        | 0.000105251          | 0.213679           | -4.67993                     | T down vs N                            | 26.095  | 22.3076   | 13.6777    | 1         |
| cg08190450                                      | NXN                                                         | 2.09E-05          | 2.09E-05             | 0.126455           | -7.90798                     | T down vs N                            | 35.243  | 40.0506   | 18.1826    | 1         |
| cg08190913                                      | PRDM14                                                      | 0.00329492        | 0.00329492           | 0.304125           | -3.28812                     | T down vs N                            | 11.901  | 13.2705   | 17.8409    | 1         |
| cg08191046                                      | CLK3                                                        | 8.27E-05          | 8.27E-05             | 0.202244           | -4.94452                     | T down vs N                            | 27.345  | 23.9258   | 13.9992    | 1         |
| cg08191854                                      | TRPM2                                                       | 4.04E-06          | 4.04E-06             | 0.133209           | -7.50702                     | T down vs N                            | 46.662  | 38.0604   | 13.0506    | 1         |
| cg08193082                                      | POU6F2;POU6F2                                               | 0.00067655        | 0.000676554          | 0.264878           | -3.77532                     | T down vs N                            | 17.652  | 16.5301   | 14.9835    | 1         |
| cg08195943                                      | TRH                                                         | 6.93E-05          | 6.93E-05             | 50.7027            | 50.7027                      | T up vs N                              | 29.515  | 135.872   | 69.0526    | 1         |
| cg08198265                                      | BST1                                                        | 0.00062558        | 0.000625578          | 0.322988           | -3.09609                     | T down vs N                            | 17.968  | 11.9626   | 10.6524    | 1         |
| cg08199953                                      | SALL1;SALL1                                                 | 1.62E-05          | 1.62E-05             | 0.118095           | -8.46776                     | T down vs N                            | 36.864  | 42.7437   | 18.552     | 1         |
| cg08200835                                      | KIAA1324L;KIAA1324L;KIAA1324L                               | 2.93E-05          | 2.93E-05             | 4.56663            | 4.56663                      | T up vs N                              | 33.161  | 21.6047   | 10.4241    | 1         |
| cg08202265                                      | TAC1;TAC1;TAC1;TAC1                                         | 5.83E-05          | 5.83E-05             | 0.255664           | -3.91138                     | T down vs N                            | 29.223  | 17.4229   | 9.53918    | 1         |
| cg08203192                                      | PRKCE                                                       | 9.43E-05          | 9.43E-05             | 0.211591           | -4.72611                     | T down vs N                            | 26.661  | 22.5923   | 13.5582    | 1         |
| cg08203284                                      | HOXA4                                                       | 0.00211156        | 0.00211156           | 6.28106            | 6.28106                      | T up vs N                              | 13.399  | 31.6253   | 37.7645    | 1         |
| cg08204129                                      | PLOD2;PLOD2                                                 | 0.0008024         | 0.000802404          | 0.309864           | -3.22722                     | T down vs N                            | 16.973  | 12.8569   | 12.1196    | 1         |
| cg08204155                                      | ZDHHC8                                                      | 9.02E-08          | 9.02E-08             | 0.159465           | -6.27098                     | T down vs N                            | 84.114  | 31.57     | 6.00521    | 1         |
| cg08213909                                      | MCC;MCC                                                     | 2.81E-06          | 2.81E-06             | 0.206338           | -4.84641                     | T down vs N                            | 49.523  | 23.3296   | 7.53745    | 1         |
| cg08214029                                      | CCL18                                                       | 1.04E-06          | 1.04E-06             | 0.261908           | -3.81814                     | T down vs N                            | 58.026  | 16.8119   | 4.63571    | 1         |
| cg08217388                                      | WNT5A                                                       | 0.00088592        | 0.000885922          | 3.31563            | 3.31563                      | T up vs N                              | 16.587  | 13.4569   | 12.981     | 1         |
| cg08217733                                      | CCDC106;U2AF2;U2AF2                                         | 2.59E-05          | 2.59E-05             | 3.99186            | 3.99186                      | T up vs N                              | 33.905  | 17.9471   | 8.46926    | 1         |
| cg08223235                                      | BCL2                                                        | 3.09E-05          | 3.09E-05             | 0.247971           | -4.03273                     | T down vs N                            | 32.845  | 18.2122   | 8.87191    | 1         |
| cg08225389                                      | SULF1;SULF1;SULF1;SULF1<br>HIST1H2BF;HIST1H3D;HIST1H2AD;HIS | 0.00122421        | 0.00122421           | 0.282856           | -3.53537                     | T down vs N                            | 15.357  | 14.9363   | 15.5613    | 1         |
| cg08228366                                      | T1H3D                                                       | 0.00273411        | 0.00273411           | 3.1472             | 3.1472                       | T up vs N                              | 12.519  | 12.3117   | 15.7357    | 1         |
| cg08228439                                      | LHX5                                                        | 0.00138385        | 0.00138385           | 0.30501            | -3.27858                     | T down vs N                            | 14.905  | 13.2058   | 14.1762    | 1         |
| cg08231577                                      | CD58;CD58;CD58                                              | 1.78E-05          | 1.78E-05             | 3.15577            | 3.15577                      | T up vs N                              | 36.24   | 12.3702   | 5.46144    | 1         |
| cg08231696                                      | CLCNKA;CLCNKA                                               | 0.00056668        | 0.000566676          | 0.316926           | -3.15531                     | T down vs N                            | 18.372  | 12.3671   | 10.7704    | 1         |
| cg08234354                                      | EYA1;EYA1;EYA1;EYA1                                         | 1.85E-05          | 1.85E-05             | 0.242787           | -4.11884                     | T down vs N                            | 36.024  | 18.7683   | 8.33601    | 1         |
| cg08235183                                      | COLEC11;COLEC11                                             | 2.26E-05          | 2.26E-05             | 0.282823           | -3.53579                     | T down vs N                            | 34.742  | 14.9391   | 6.87995    | 1         |
| cg08239375                                      | SLC4A1AP;SUPT7L                                             | 2.70E-06          | 2.70E-06             | 0.227361           | -4.3983                      | T down vs N                            | 49.849  | 20.5494   | 6.59577    | 1         |
| cg08240778                                      | HCCA2;KRTAP5-4                                              | 1.36E-05          | 1.36E-05             | 0.263354           | -3.79717                     | T down vs N                            | 38.018  | 16.674    | 7.01725    | 1         |
| cg08241465                                      | CNGB1                                                       | 0.00062958        | 0.000629581          | 0.289534           | -3.45382                     | T down vs N                            | 17.942  | 14.3894   | 12.8319    | 1         |
| cg08242576                                      | LELP1                                                       | 0.00242326        | 0.00242326           | 0.232396           | -4.30299                     | T down vs N                            | 12.926  | 19.9461   | 24.6895    | 1         |
| cg08244156                                      | PGLYRP3                                                     | 2.21E-05          | 2.21E-05             | 0.137979           | -7.24749                     | T down vs N                            | 34.897  | 36.7434   | 16.8468    | 1         |
| cg08247938                                      | COL5A2                                                      | 0.0008396         | 0.000839602          | 0.286284           | -3.49303                     | T down vs N                            | 16.796  | 14.6527   | 13.9584    | 1         |
| cg08248516                                      | HOXA7                                                       | 0.00517778        | 0.00517778           | 11.1746            | 11.1746                      | T up vs N                              | 10.468  | 54.5643   | 83.402     | 1         |
| cg08248579                                      | KIF13A;KIF13A;KIF13A;KIF13A                                 | 0.00146528        | 0.00146528           | 0.155818           | -6.41774                     | T down vs N                            | 14.696  | 32.3707   | 35.2427    | 1         |
| cg08249424                                      | CDYL;CDYL                                                   | 1.43E-05          | 1.43E-05             | 6.21815            | 6.21815                      | T up vs N                              | 37.686  | 31.2798   | 13.2802    | 1         |
| cg08252585                                      | NCOA1;NCOA1;NCOA1                                           | 0.00179196        | 0.00179196           | 0.250607           | -3.99031                     | T down vs N                            | 13.974  | 17.9371   | 20.5378    | 1         |
| cg08253405                                      | AKNAD1                                                      | 5.68E-05          | 5.68E-05             | 0.312829           | -3.19663                     | T down vs N                            | 29.368  | 12.6487   | 6.89116    | 1         |
| cg08255211                                      | A2BP1;A2BP1                                                 | 3.06E-05          | 3.06E-05             | 0.199254           | -5.01871                     | T down vs N                            | 32.912  | 24.3738   | 11.8493    | 1         |
| cg08257257                                      | MTL5;MTL5                                                   | 0.00013795        | 0.000137952          | 4.02681            | 4.02681                      | T up vs N                              | 24.74   | 18.1739   | 11.7538    | 1         |
| cg08258259                                      | TMEM200B                                                    | 0.00595677        | 0.00595677           | 11.2171            | 11.2171                      | T up vs N                              | 10.041  | 54.7361   | 87.2233    | 1         |
| cg08258309                                      | ELK3                                                        | 0.00012626        | 0.00012626           | 0.187682           | -5.32815                     | T down vs N                            | 25.178  | 26.2154   | 16.6591    | 1         |
| cg08258494                                      | CHRM3                                                       | 0.00371876        | 0.00371876           | 0.243815           | -4.10148                     | T down vs N                            | 11.509  | 18.6565   | 25.9368    | 1         |
| CPT1B;CPT1B;CHKB-<br>CPT1B;CPT1B;CPT1B;CPT1B;CP |                                                             |                   |                      |                    |                              |                                        |         |           |            |           |
| cg08260245                                      | T1B;CPT1B                                                   | 0.00038865        | 0.00038865           | 6.67758            | 6.67758                      | T up vs N                              | 19.961  | 33.7676   | 27.0675    | 1         |
| cg08260959                                      | HIST1H4F                                                    | 0.0016512         | 0.0016512            | 9.39468            | 9.39468                      | T up vs N                              | 14.265  | 47.0017   | 52.7176    | 1         |
| cg08261617                                      | OR2M5                                                       | 0.00306518        | 0.00306518           | 0.316098           | -3.16358                     | T down vs N                            | 12.139  | 12.4235   | 16.3756    | 1         |
| cg08264805                                      | RUSC1;RUSC1;C1orf104                                        | 0.00014417        | 0.000144171          | 8.23256            | 8.23256                      | T up vs N                              | 24.523  | 41.6239   | 27.1575    | 1         |
| cg08264885                                      | POLR3D;MIR320A                                              | 8.45E-07          | 8.45E-07             | 0.191559           | -5.22032                     | T down vs N                            | 59.954  | 25.5785   | 6.82619    | 1         |

| Probeset ID | UCSC_REFGENE_NAME                | p-value<br>(Type) | p-value (T vs.<br>N) | Ratio (T<br>vs. N) | Fold-<br>Change (T<br>vs. N) | Fold-Change (T vs.<br>N) (Description) | F(Type) | SS (Type) | SS (Error) | F (Error) |
|-------------|----------------------------------|-------------------|----------------------|--------------------|------------------------------|----------------------------------------|---------|-----------|------------|-----------|
| cg08266366  | AQP5                             | 0.00384054        | 0.00384054           | 5.39181            | 5.39181                      | T up vs N                              | 11.406  | 26.5889   | 37.2998    | 1         |
| cg08267038  | SIDT1                            | 0.00034588        | 0.000345883          | 0.319418           | -3.13069                     | T down vs N                            | 20.467  | 12.199    | 9.53637    | 1         |
| cg08271180  | EFR3A                            | 6.23E-06          | 6.23E-06             | 0.189115           | -5.28779                     | T down vs N                            | 43.42   | 25.9776   | 9.57263    | 1         |
| cg08271622  | LOC388796;SNORA71B;LOC388796     | 1.53E-06          | 1.53E-06             | 0.151951           | -6.58106                     | T down vs N                            | 54.579  | 33.2517   | 9.74783    | 1         |
| cg08273233  | HTR1E                            | 1.83E-06          | 1.83E-06             | 0.158612           | -6.3047                      | T down vs N                            | 53.069  | 31.7547   | 9.5738     | 1         |
| cg08274029  | PPR1R11                          | 0.00036238        | 0.00036238           | 0.185612           | -5.38759                     | T down vs N                            | 20.264  | 26.5642   | 20.9746    | 1         |
| cg08274518  | CLASP2                           | 1.05E-05          | 1.05E-05             | 0.160532           | -6.22927                     | T down vs N                            | 39.735  | 31.341    | 12.6199    | 1         |
| cg08276125  | SKIV2L                           | 0.00014054        | 0.000140542          | 0.280652           | -3.56313                     | T down vs N                            | 24.648  | 15.1219   | 9.81621    | 1         |
| cg08276645  | ANKMY1;ANKMY1                    | 0.00053002        | 0.000530024          | 3.11916            | 3.11916                      | T up vs N                              | 18.648  | 12.1203   | 10.3992    | 1         |
| cg08278554  | C15orf48;C15orf48;C15orf48       | 5.35E-05          | 5.35E-05             | 8.04714            | 8.04714                      | T up vs N                              | 29.698  | 40.7292   | 21.9433    | 1         |
| cg08279035  | NFATC4;NFATC4                    | 9.23E-06          | 9.23E-06             | 0.191665           | -5.21744                     | T down vs N                            | 40.624  | 25.5614   | 10.0675    | 1         |
| cg08279092  | TCEB3                            | 0.00011459        | 0.000114588          | 0.09501            | -10.5252                     | T down vs N                            | 25.664  | 51.891    | 32.3507    | 1         |
| cg08282037  | EPS8L1;EPS8L1                    | 0.00019742        | 0.000197419          | 0.30783            | -3.24855                     | T down vs N                            | 23.014  | 13.0019   | 9.03931    | 1         |
| cg08282819  | IL21R;IL21R;IL21R                | 6.84E-05          | 6.84E-05             | 0.216661           | -4.6155                      | T down vs N                            | 28.355  | 21.9086   | 12.3623    | 1         |
| cg08284207  | ACTRT1                           | 0.00376733        | 0.00376733           | 0.303582           | -3.294                       | T down vs N                            | 11.467  | 13.3103   | 18.5717    | 1         |
| cg08287220  | CYP3A7                           | 7.10E-05          | 7.10E-05             | 0.300422           | -3.32865                     | T down vs N                            | 28.153  | 13.545    | 7.69795    | 1         |
| cg08287344  | NCAPD3                           | 4.65E-06          | 4.65E-06             | 0.256379           | -3.90048                     | T down vs N                            | 45.58   | 17.3517   | 6.09099    | 1         |
| cg08288811  | PCDHA2;PCDHA1;PCDHA3;PCDHA3;PC   | 5.23E-05          | 5.23E-05             | 5.82312            | 5.82312                      | T up vs N                              | 29.823  | 29.0732   | 15.5976    | 1         |
| cg08290013  | DHA1                             | 2.30E-06          | 2.30E-06             | 0.301856           | -3.31284                     | T down vs N                            | 51.153  | 13.438    | 4.2032     | 1         |
| cg08290628  | SEZ6;SEZ6                        | 0.00035022        | 0.000350217          | 3.39374            | 3.39374                      | T up vs N                              | 20.413  | 13.9848   | 10.9615    | 1         |
| cg08292023  | GRM5;GRM5                        | 5.02E-05          | 5.02E-05             | 3.93036            | 3.93036                      | T up vs N                              | 30.051  | 17.5468   | 9.34244    | 1         |
| cg08292485  | DEFB121                          | 9.65E-05          | 9.65E-05             | 0.264509           | -3.78059                     | T down vs N                            | 27.643  | 15.5904   | 8.45979    | 1         |
| cg08294662  | MEG3;MEG3;MEG3                   | 0.00111081        | 0.00111081           | 0.296816           | -3.36909                     | T down vs N                            | 15.721  | 13.8185   | 14.0633    | 1         |
| cg08296191  | SHANK3                           | 2.29E-06          | 2.29E-06             | 4.18187            | 4.18187                      | T up vs N                              | 51.186  | 19.1732   | 5.99325    | 1         |
| cg08296680  | SLC16A3;SLC16A3                  | 6.53E-06          | 6.53E-06             | 11.7588            | 11.7588                      | T up vs N                              | 43.074  | 56.8924   | 21.133     | 1         |
| cg08296730  | TRIM73;TRIM74                    | 2.81E-05          | 2.81E-05             | 0.299016           | -3.34431                     | T down vs N                            | 33.421  | 13.6509   | 6.53534    | 1         |
| cg08296903  | ERCC4                            | 1.15E-05          | 1.15E-05             | 3.3139             | 3.3139                       | T up vs N                              | 39.136  | 13.4452   | 5.49687    | 1         |
| cg08298757  | FAM83F                           | 6.36E-05          | 6.36E-05             | 9.75701            | 9.75701                      | T up vs N                              | 28.747  | 48.6031   | 27.0514    | 1         |
| cg08299089  | LTBP2                            | 2.55E-05          | 2.55E-05             | 0.312311           | -3.20194                     | T down vs N                            | 33.999  | 12.6849   | 5.9696     | 1         |
| cg08300860  | LDB3;LDB3;LDB3;LDB3;LDB3;LDB3;LD | 0.00014899        | 0.000148991          | 3.04386            | 3.04386                      | T up vs N                              | 24.362  | 11.6052   | 7.62176    | 1         |
| cg08301181  | B3                               | 1.68E             |                      |                    |                              |                                        |         |           |            |           |

| Probeset ID                          | UCSC_REFGENE_NAME                   | p-value<br>(Type) | p-value (T vs.<br>N) | Ratio (T<br>vs. N) | Fold-<br>Change (T<br>vs. N) | Fold-Change (T vs.<br>N) (Description) | F(Type) | SS (Type) | SS (Error) | F (Error) |
|--------------------------------------|-------------------------------------|-------------------|----------------------|--------------------|------------------------------|----------------------------------------|---------|-----------|------------|-----------|
| CD79B;CD79B;CD79B;CD79B;CD79B;C      |                                     |                   |                      |                    |                              |                                        |         |           |            |           |
| cg08355301                           | D79B                                | 0.00010579        | 0.000105785          | 0.263806           | -3.79066                     | T down vs N                            | 27.14   | 15.6529   | 8.65105    | 1         |
| cg08358263                           | PRDM1;PRDM1                         | 3.10E-05          | 3.10E-05             | 0.299177           | -3.3425                      | T down vs N                            | 32.825  | 13.6387   | 6.64802    | 1         |
| cg08358964                           | PRM3                                | 0.00043533        | 0.000435329          | 0.291677           | -3.42845                     | T down vs N                            | 19.475  | 14.2187   | 11.6818    | 1         |
| TMEM176B;TMEM176B;TMEM176B;T         |                                     |                   |                      |                    |                              |                                        |         |           |            |           |
| cg08359956                           | MEM176B;TMEM176B;TMEM176A           | 0.00038642        | 0.00038642           | 3.39322            | 3.39322                      | T up vs N                              | 19.985  | 13.9813   | 11.1932    | 1         |
| cg08360666                           | ZNF343                              | 0.00200443        | 0.00200443           | 0.255232           | -3.918                       | T down vs N                            | 13.58   | 17.4661   | 20.5786    | 1         |
| cg08363339                           | SLMO2                               | 0.00025015        | 0.000250153          | 0.109032           | -9.17158                     | T down vs N                            | 21.917  | 45.9986   | 33.5809    | 1         |
| cg08367223                           | C19orf54;SNRPA                      | 0.00043427        | 0.000434269          | 0.294439           | -3.39629                     | T down vs N                            | 19.485  | 14.002    | 11.4977    | 1         |
| cg08367801                           | RGBM                                | 0.00086467        | 0.00086467           | 0.297557           | -3.3607                      | T down vs N                            | 16.681  | 13.7618   | 13.1999    | 1         |
| cg08369079                           | PRDM1;PRDM1                         | 0.00070022        | 0.000700221          | 0.197166           | -5.07186                     | T down vs N                            | 17.514  | 24.6932   | 22.5591    | 1         |
| cg08369368                           | NSD1;NSD1                           | 0.00252212        | 0.00252212           | 18.8535            | 18.8535                      | T up vs N                              | 12.79   | 80.7755   | 101.046    | 1         |
| cg08371934                           | RANBP3;RANBP3;RANBP3                | 0.0003365         | 0.000336504          | 0.323982           | -3.08659                     | T down vs N                            | 20.588  | 11.8976   | 9.24625    | 1         |
| cg08372315                           | HTR3A;HTR3A                         | 5.13E-06          | 5.13E-06             | 0.271963           | -3.67698                     | T down vs N                            | 44.845  | 15.8798   | 5.66566    | 1         |
| cg08373573                           | MUC6                                | 6.65E-06          | 6.65E-06             | 0.046167           | -21.6604                     | T down vs N                            | 42.945  | 88.5908   | 33.0066    | 1         |
| cg08373622                           | VGLL3                               | 0.00027485        | 0.000274846          | 0.276319           | -3.61901                     | T down vs N                            | 21.489  | 15.4945   | 11.5365    | 1         |
| cg08375941                           | GPR15                               | 2.93E-05          | 2.93E-05             | 0.304913           | -3.27963                     | T down vs N                            | 33.18   | 13.2129   | 6.37156    | 1         |
| cg08376141                           | PRRT1                               | 2.09E-05          | 2.09E-05             | 7.47878            | 7.47878                      | T up vs N                              | 35.245  | 37.9182   | 17.2134    | 1         |
| cg08376992                           | DPEP2                               | 3.21E-06          | 3.21E-06             | 0.242836           | -4.118                       | T down vs N                            | 48.443  | 18.7629   | 6.19706    | 1         |
| cg08378286                           | COL23A1                             | 0.00014053        | 0.000140525          | 0.215822           | -4.63345                     | T down vs N                            | 24.649  | 22.02     | 14.2937    | 1         |
| cg08378442                           | TUBA4B;TUBA4A                       | 0.00080903        | 0.000809026          | 4.2084             | 4.2084                       | T up vs N                              | 16.941  | 19.3431   | 18.2685    | 1         |
| cg08379517                           | LRRC25                              | 4.34E-05          | 4.34E-05             | 0.290799           | -3.4388                      | T down vs N                            | 30.868  | 14.2883   | 7.40621    | 1         |
| cg08382235                           | TBX1;TBX1;TBX1                      | 0.00319748        | 0.00319748           | 9.52287            | 9.52287                      | T up vs N                              | 12      | 47.5721   | 63.4324    | 1         |
| cg08382542                           | CBX8                                | 0.00407081        | 0.00407081           | 5.10889            | 5.10889                      | T up vs N                              | 11.22   | 24.9149   | 35.5301    | 1         |
| cg08383526                           | ADAM7                               | 1.88E-07          | 1.88E-07             | 0.161947           | -6.17487                     | T down vs N                            | 75.453  | 31.0411   | 6.58232    | 1         |
| cg08386867                           | LILRB1;LILRB1;LILRB1;LILRB1         | 0.0004633         | 0.000463299          | 0.171847           | -5.81911                     | T down vs N                            | 19.211  | 29.0505   | 24.1951    | 1         |
| cg08386897                           | STK32C                              | 1.54E-05          | 1.54E-05             | 0.110551           | -9.04563                     | T down vs N                            | 37.199  | 45.4263   | 19.5389    | 1         |
| cg08389130                           | TEX101;TEX101                       | 0.00054155        | 0.000541549          | 0.328869           | -3.04072                     | T down vs N                            | 18.559  | 11.5837   | 9.98649    | 1         |
| cg08391415                           | PAX6                                | 6.13E-05          | 6.13E-05             | 8.04988            | 8.04988                      | T up vs N                              | 28.948  | 40.7425   | 22.5187    | 1         |
| cg08393317                           | CACNG7                              | 4.61E-05          | 4.61E-05             | 8.53239            | 8.53239                      | T up vs N                              | 30.53   | 43.0485   | 22.561     | 1         |
| cg08397747                           | SPDYA;SPDYA;SPDYA                   | 0.00019291        | 0.000192908          | 0.317075           | -3.15383                     | T down vs N                            | 23.123  | 12.357    | 8.5505     | 1         |
| cg08400475                           | OR10K2                              | 4.58E-07          | 4.58E-07             | 0.180629           | -5.53621                     | T down vs N                            | 65.919  | 27.4296   | 6.65773    | 1         |
| cg08401657                           | TFAP2A;TFAP2A;TFAP2A                | 4.34E-05          | 4.34E-05             | 0.152854           | -6.54218                     | T down vs N                            | 30.879  | 33.0429   | 17.1214    | 1         |
| BLCAP;BLCAP;BLCAP;BLCAP;NNAT;NN      |                                     |                   |                      |                    |                              |                                        |         |           |            |           |
| cg08402058                           | AT;BLCAP                            | 4.23E-05          | 4.23E-05             | 3.9028             | 3.9028                       | T up vs N                              | 31.027  | 17.3668   | 8.95579    | 1         |
| cg08402365                           | MAP1D                               | 0.00532322        | 0.00532322           | 3.50002            | 3.50002                      | T up vs N                              | 10.383  | 14.6995   | 22.6524    | 1         |
| cg08404009                           | MYO16                               | 0.00161256        | 0.00161256           | 5.35464            | 5.35464                      | T up vs N                              | 14.35   | 26.371    | 29.4031    | 1         |
| IL5RA;IL5RA;IL5RA;IL5RA;IL5RA;IL5RA; |                                     |                   |                      |                    |                              |                                        |         |           |            |           |
| cg08404225                           | IL5RA;IL5RA;IL5RA;IL5RA;IL5RA;IL5RA | 6.62E-05          | 6.62E-05             | 0.291675           | -3.42847                     | T down vs N                            | 28.533  | 14.2188   | 7.97326    | 1         |
| cg08406102                           | EMX2OS                              | 0.00206498        | 0.00206498           | 0.202524           | -4.93768                     | T down vs N                            | 13.476  | 23.8844   | 28.3571    | 1         |
| cg08409113                           | WNK4                                | 3.75E-05          | 3.75E-05             | 14.3184            | 14.3184                      | T up vs N                              | 31.718  | 66.3481   | 33.4687    | 1         |
| cg08409953                           | PIK3R4                              | 0.00141679        | 0.00141679           | 0.258124           | -3.87411                     | T down vs N                            | 14.819  | 17.1791   | 18.5486    | 1         |
| cg08410996                           | ZBED3                               | 0.00057159        | 0.000571589          | 5.77417            | 5.77417                      | T up vs N                              | 18.336  | 28.7953   | 25.1262    | 1         |
| cg08412316                           | MTMR2;MTMR2;MTMR2;MTMR2             | 7.20E-05          | 7.20E-05             | 0.242831           | -4.11809                     | T down vs N                            | 28.075  | 18.7635   | 10.6933    | 1         |
| cg08415493                           | ESR1                                | 0.00013002        | 0.000130022          | 0.222276           | -4.49891                     | T down vs N                            | 25.032  | 21.1818   | 13.5389    | 1         |
| cg08415557                           | OR7G1                               | 2.72E-05          | 2.72E-05             | 0.154026           | -6.49241                     | T down vs N                            | 33.612  | 32.7747   | 15.6015    | 1         |
| cg08416522                           | C21orf7                             | 5.98E-05          | 5.98E-05             | 0.279635           | -3.57609                     | T down vs N                            | 29.08   | 15.2085   | 8.36788    | 1         |
| cg08416650                           | LPCAT2;LPCAT2                       | 0.00013257        | 0.000132566          | 19.6525            | 19.6525                      | T up vs N                              | 24.936  | 83.075    | 53.3042    | 1         |
| cg08416661                           | CTSW                                | 0.00064477        | 0.000644772          | 0.270396           | -3.69828                     | T down vs N                            | 17.846  | 16.021    | 14.3642    | 1         |
| cg08418279                           | ZNF423                              | 0.0002111         | 0.000211101          | 0.271447           | -3.68396                     | T down vs N                            | 22.7    | 15.9261   | 11.2255    | 1         |
| cg08421126                           | HAAO                                | 4.57E-05          | 4.57E-05             | 5.3336             | 5.3336                       | T up vs N                              | 30.586  | 26.2474   | 13.7303    | 1         |
| cg08421550                           | FATE1                               | 0.00185077        | 0.00185077           | 0.265278           | -3.76963                     | T down vs N                            | 13.86   | 16.4925   | 19.0393    | 1         |
| cg08423507                           | ACR                                 | 1.90E-05          | 1.90E-05             | 0.134141           | -7.45486                     | T down vs N                            | 35.827  | 37.7976   | 16.8799    | 1         |
| cg08423533                           | MKX                                 | 0.00069782        | 0.000697821          | 4.44906            | 4.44906                      | T up vs N                              | 17.527  | 20.8691   | 19.0505    | 1         |
| cg08424749                           | PRRT1                               | 0.00061971        | 0.000619709          | 3.07803            | 3.07803                      | T up vs N                              | 18.573  | 11.1426   | 8.99919    | 1         |
| cg08425229                           | MEGF6                               | 0.00011892        | 0.000118919          | 0.327628           | -3.05225                     | T down vs N                            | 25.478  | 11.6626   | 7.32413    | 1         |
| cg08426200                           | AGPHD1;AGPHD1                       | 1.73E-05          | 1.73E-05             | 0.186106           | -5.37327                     | T down vs N                            | 36.422  | 26.4803   | 11.6328    | 1         |
| cg08430074                           | NOSTRIN                             | 0.00020907        | 0.00020907           | 0.312022           | -3.2049                      | T down vs N                            | 22.745  | 12.705    | 8.93735    | 1         |
| cg08435240                           | KCNJ15;KCNJ15;KCNJ15                | 1.17E-05          | 1.17E-05             | 0.202672           | -4.93407                     | T down vs N                            | 39.01   | 23.8626   | 9.78735    | 1         |
| cg08437789                           | ADAM8;ADAM8;ADAM8                   | 0.00031258        | 0.000312581          | 0.140632           | -7.11075                     | T down vs N                            | 20.914  | 36.0401   | 27.5724    | 1         |
| cg08437995                           | NOM1                                | 1.73E-05          | 1.73E-05             | 0.273109           | -3.66154                     | T down vs N                            | 36.428  | 15.7774   | 6.92982    | 1         |
| cg08439328                           | MSA4B8                              | 2.53E-05          | 2.53E-05             | 0.252605           | -3.95875                     | T down vs N                            | 34.062  | 17.7318   | 8.32913    | 1         |
| cg08439439                           | UST                                 | 2.64E-05          | 2.64E-05             | 0.269517           | -3.71034                     | T down vs N                            | 33.789  | 16.1008   | 7.62427    | 1         |
| cg08439728                           | PSORS1C1                            | 5.69E-05          | 5.69E-05             | 0.297461           | -3.36178                     | T down vs N                            | 29.358  | 13.7691   | 7.50418    | 1         |
| IKZF3;IKZF3;IKZF3;IKZF3;IKZF3;IKZF3  |                                     |                   |                      |                    |                              |                                        |         |           |            |           |
| cg08441850                           | IKZF3;IKZF3;IKZF3;IKZF3;IKZF3;IKZF3 | 0.00012245        | 0.00012245           | 0.307896           | -3.24785                     | T down vs N                            | 25.331  | 12.9971   | 8.20944    | 1         |
| cg08442052                           | DNAH5                               | 2.26E-05          | 2.26E-05             | 0.274808           | -3.6389                      | T down vs N                            | 34.763  | 15.6269   | 7.19239    | 1         |
| cg08443845                           | RUNX1                               | 0.00167912        | 0.00167912           | 0.326684           | -3.06106                     | T down vs N                            | 14.205  | 11.723    | 13.2041    | 1         |
| cg08447324                           | SHANK1                              | 0.00099699        | 0.000996994          | 12.4087            | 12.4087                      | T up vs N                              | 16.132  | 59.4031   | 58.9181    | 1         |
| cg08448341                           | SLC2A12                             | 2.78E-05          | 2.78E-05             | 0.299904           | -3.3344                      | T down vs N                            | 33.491  | 13.5839   | 6.48959    | 1         |

| Probeset ID                                                                             | UCSC_REFGENE_NAME               | p-value<br>(Type) | p-value (T vs.<br>N) | Ratio (T<br>vs. N) | Fold-<br>Change (T<br>vs. N) | Fold-Change (T vs.<br>N) (Description) | F(Type) | SS (Type) | SS (Error) | F (Error) |
|-----------------------------------------------------------------------------------------|---------------------------------|-------------------|----------------------|--------------------|------------------------------|----------------------------------------|---------|-----------|------------|-----------|
| PCDHA6;PCDHA2;PCDHA1;PCDHA1;PCDHA6;PCDHA5;PCDHA3;PCDHA4;PCD                             |                                 |                   |                      |                    |                              |                                        |         |           |            |           |
| cg08448812                                                                              | HA6                             | 9.18E-05          | 9.18E-05             | 4.60595            | 4.60595                      | T up vs N                              | 26.8    | 21.8493   | 13.0442    | 1         |
| cg08451978                                                                              | C3orf52                         | 4.78E-06          | 4.78E-06             | 0.151844           | -6.58571                     | T down vs N                            | 45.376  | 33.2766   | 11.7336    | 1         |
| cg08452327                                                                              | ETS1;ETS1;ETS1                  | 0.00042527        | 0.000425265          | 0.277402           | -3.60488                     | T down vs N                            | 19.574  | 15.4004   | 12.5883    | 1         |
| cg08452456                                                                              | TBKBP1                          | 4.38E-06          | 4.38E-06             | 14.2726            | 14.2726                      | T up vs N                              | 46.043  | 66.1886   | 23.0004    | 1         |
| cg08454053                                                                              | RTN4RL1                         | 0.00012659        | 0.000126587          | 4.38722            | 4.38722                      | T up vs N                              | 25.165  | 20.4795   | 13.0208    | 1         |
| cg08454125                                                                              | TMIE                            | 1.46E-06          | 1.46E-06             | 0.29447            | -3.39593                     | T down vs N                            | 55.005  | 13.9996   | 4.07227    | 1         |
| cg08457898                                                                              | EPHX3;EPHX3;EPHX3               | 7.36E-06          | 7.36E-06             | 5.77041            | 5.77041                      | T up vs N                              | 42.212  | 28.7739   | 10.9064    | 1         |
| cg08458711                                                                              | BSND                            | 8.97E-06          | 8.97E-06             | 0.29778            | -3.35819                     | T down vs N                            | 40.822  | 13.7448   | 5.38725    | 1         |
| cg08460026                                                                              | CTLA4;CTLA4                     | 7.40E-06          | 7.40E-06             | 0.205605           | -4.8637                      | T down vs N                            | 42.174  | 23.435    | 8.89074    | 1         |
| cg08460464                                                                              | HACE1                           | 0.00019802        | 0.000198019          | 0.236065           | -4.23612                     | T down vs N                            | 23      | 19.5202   | 13.5795    | 1         |
| cg08463280                                                                              | ODZ2                            | 1.80E-05          | 1.80E-05             | 0.269383           | -3.71219                     | T down vs N                            | 36.186  | 16.1131   | 7.12463    | 1         |
| cg08463848                                                                              | SBSN;SBSN;SBSN                  | 1.73E-05          | 1.73E-05             | 0.331193           | -3.01939                     | T down vs N                            | 36.442  | 11.4374   | 5.0216     | 1         |
| cg08465307                                                                              | LOC100133612                    | 1.55E-06          | 1.55E-06             | 0.097821           | -10.2228                     | T down vs N                            | 54.483  | 50.6133   | 14.8635    | 1         |
| cg08466256                                                                              | COL5A2                          | 0.00010906        | 0.000109064          | 0.270833           | -3.69231                     | T down vs N                            | 25.914  | 15.9814   | 8.8673     | 1         |
| cg08467643                                                                              | DVL3                            | 6.73E-05          | 6.73E-05             | 0.287398           | -3.4795                      | T down vs N                            | 28.44   | 14.5619   | 8.19221    | 1         |
| cg08467760                                                                              | TMEM200B                        | 0.00048042        | 0.000480415          | 6.15654            | 6.15654                      | T up vs N                              | 19.058  | 30.9398   | 25.9751    | 1         |
| cg08467887                                                                              | EPPK1                           | 0.0017095         | 0.0017095            | 0.306735           | -3.26014                     | T down vs N                            | 14.141  | 13.0806   | 14.8       | 1         |
| cg08468443                                                                              | CLIC2;CLIC2                     | 1.02E-05          | 1.02E-05             | 0.183562           | -5.44775                     | T down vs N                            | 39.958  | 26.9157   | 10.7777    | 1         |
| cg08468689                                                                              | GHDC;GHDC;GHDC;GHDC             | 2.07E-06          | 2.07E-06             | 0.147988           | -6.75732                     | T down vs N                            | 52.014  | 34.1911   | 10.5176    | 1         |
| cg08469215                                                                              | TMEM79;TMEM79                   | 0.00047854        | 0.000478544          | 8.70726            | 8.70726                      | T up vs N                              | 19.075  | 43.8671   | 36.7964    | 1         |
| cg08469305                                                                              | MIR1265                         | 8.53E-05          | 8.53E-05             | 0.281779           | -3.54888                     | T down vs N                            | 27.181  | 15.0266   | 8.84537    | 1         |
| cg08469834                                                                              | CASP4                           | 4.12E-07          | 4.12E-07             | 0.1429             | -6.99792                     | T down vs N                            | 66.997  | 35.4548   | 8.46718    | 1         |
| cg08470180                                                                              | C5orf24;C5orf24                 | 1.90E-05          | 1.90E-05             | 0.327987           | -3.0489                      | T down vs N                            | 35.846  | 11.6397   | 5.19539    | 1         |
| cg08470244                                                                              | MACF1;MACF1                     | 0.00259392        | 0.00259392           | 3.77106            | 3.77106                      | T up vs N                              | 12.695  | 16.502    | 20.7974    | 1         |
| cg08470875                                                                              | FAM59B                          | 0.00015148        | 0.000151475          | 29.6926            | 29.6926                      | T up vs N                              | 24.282  | 107.694   | 70.9631    | 1         |
| cg08472142                                                                              | DCST1;DCST2;DCST1               | 1.21E-05          | 1.21E-05             | 0.257277           | -3.88686                     | T down vs N                            | 38.775  | 17.2626   | 7.12314    | 1         |
| cg08472449                                                                              | TANC1;TANC1                     | 0.00628679        | 0.00628679           | 0.330727           | -3.02364                     | T down vs N                            | 9.8785  | 11.4666   | 18.5722    | 1         |
| cg08473199                                                                              | WNT10A                          | 0.00021567        | 0.00021567           | 14.1459            | 14.1459                      | T up vs N                              | 22.6    | 65.7454   | 46.545     | 1         |
| cg08473725                                                                              | ADNP;ADNP                       | 0.00020088        | 0.000200878          | 0.329393           | -3.03589                     | T down vs N                            | 22.932  | 11.5505   | 8.05889    | 1         |
| cg08475088                                                                              | NLRP9                           | 0.00314409        | 0.00314409           | 0.292242           | -3.42182                     | T down vs N                            | 12.055  | 14.174    | 18.8128    | 1         |
| cg08475953                                                                              | COL23A1                         | 0.00042049        | 0.000420492          | 19.1087            | 19.1087                      | T up vs N                              | 19.622  | 81.517    | 66.4684    | 1         |
| cg08476244                                                                              | EPB41L5                         | 0.00039995        | 0.000399948          | 0.309254           | -3.23359                     | T down vs N                            | 19.837  | 12.9002   | 10.4049    | 1         |
| cg08479865                                                                              | DRD3;DRD3;DRD3;DRD3             | 1.10E-05          | 1.10E-05             | 0.179386           | -5.57458                     | T down vs N                            | 39.432  | 27.6514   | 11.2198    | 1         |
| cg08481464                                                                              | C10orf11                        | 4.52E-06          | 4.52E-06             | 7.69957            | 7.69957                      | T up vs N                              | 45.805  | 39.0227   | 13.631     | 1         |
| cg08482501                                                                              | PROKR2                          | 0.00218077        | 0.00218077           | 0.205403           | -4.86848                     | T down vs N                            | 13.287  | 23.4641   | 28.2543    | 1         |
| cg08484080                                                                              | PRKCZ                           | 1.27E-05          | 1.27E-05             | 0.118353           | -8.4493                      | T down vs N                            | 38.452  | 42.6564   | 17.7496    | 1         |
| cg08484265                                                                              | BTNL9                           | 0.00159477        | 0.00159477           | 0.31772            | -3.14743                     | T down vs N                            | 14.39   | 12.3133   | 13.691     | 1         |
| cg08489623                                                                              | 14-Sep                          | 0.00117947        | 0.00117947           | 0.213329           | -4.6876                      | T down vs N                            | 15.496  | 22.355    | 23.0817    | 1         |
| PCDHGA4;PCDHGA6;PCDHGA1;PCDHGA8;PCDHGB5;PCDHGA5;PCDHGB1;PCDHGB4;PCDHGA3;PCDHGA2;PCDHGB5 |                                 |                   |                      |                    |                              |                                        |         |           |            |           |
| cg08491188                                                                              | FUBP1                           | 0.00072359        | 0.000723587          | 0.279788           | -3.57413                     | T down vs N                            | 17.383  | 15.1954   | 13.9867    | 1         |
| cg08491437                                                                              | RNF39;RNF39                     | 0.00194768        | 0.00194768           | 10.2717            | 10.2717                      | T up vs N                              | 13.68   | 50.8215   | 59.4385    | 1         |
| cg08492173                                                                              | IRX1                            | 0.00430768        | 0.00430768           | 0.325649           | -3.07079                     | T down vs N                            | 11.041  | 11.7896   | 17.0852    | 1         |
| cg08495088                                                                              | AEBP1                           | 0.0001289         | 0.000128901          | 0.28171            | -3.54975                     | T down vs N                            | 25.075  | 15.0325   | 9.59195    | 1         |
| cg08495185                                                                              | SLA2;SLA2                       | 1.67E-05          | 1.67E-05             | 0.195426           | -5.11702                     | T down vs N                            | 36.67   | 24.9635   | 10.8923    | 1         |
| cg08496123                                                                              | HAS1                            | 3.77E-05          | 3.77E-05             | 0.20733            | -4.82324                     | T down vs N                            | 31.689  | 23.1881   | 11.7077    | 1         |
| cg08498475                                                                              | ELAVL3;ELAVL3                   | 0.00040608        | 0.000406075          | 5.37903            | 5.37903                      | T up vs N                              | 19.772  | 26.514    | 21.456     | 1         |
| cg08498647                                                                              | TREH                            | 6.83E-06          | 6.83E-06             | 0.247305           | -4.0436                      | T down vs N                            | 42.744  | 18.2826   | 6.84354    | 1         |
| cg08499840                                                                              | CCL11                           | 0.00031139        | 0.000311394          | 0.203918           | -4.90393                     | T down vs N                            | 20.931  | 23.6797   | 18.1015    | 1         |
| cg08500128                                                                              | MAGOHB                          | 0.00071708        | 0.000717083          | 0.272017           | -3.67624                     | T down vs N                            | 17.419  | 15.8749   | 14.582     | 1         |
| cg08500323                                                                              | FLT4;FLT4                       | 6.74E-05          | 6.74E-05             | 0.219396           | -4.55798                     | T down vs N                            | 28.436  | 21.5508   | 12.1258    | 1         |
| cg08502360                                                                              | TRIM31                          | 1.78E-05          | 1.78E-05             | 0.211926           | -4.71863                     | T down vs N                            | 36.27   | 22.5463   | 9.94608    | 1         |
| cg08503994                                                                              | C16orf5                         | 0.00021644        | 0.000216441          | 0.313848           | -3.18625                     | T down vs N                            | 22.584  | 12.578    | 8.91129    | 1         |
| cg08504812                                                                              | C3orf55;C3orf55;C3orf55;C3orf55 | 0.00165549        | 0.00165549           | 3.50567            | 3.50567                      | T up vs N                              | 14.256  | 14.7374   | 16.5404    | 1         |
| cg08505647                                                                              | PLACL1                          | 1.33E-06          | 1.33E-06             | 0.132213           | -7.56354                     | T down vs N                            | 55.845  | 38.3441   | 10.9859    | 1         |
| cg08509427                                                                              | CSNK2B                          | 0.00073302        | 0.000733023          | 0.257893           | -3.87758                     | T down vs N                            | 17.331  | 17.2019   | 15.8808    | 1         |
| cg08511651                                                                              | HIST1H1A                        | 0.00126369        | 0.00126369           | 8.05078            | 8.05078                      | T up vs N                              | 15.239  | 40.7468   | 42.7804    | 1         |
| cg08513253                                                                              | SOBP                            | 9.02E-06          | 9.02E-06             | 7.23218            | 7.23218                      | T up vs N                              | 40.782  | 36.665    | 14.3848    | 1         |
| cg08516112                                                                              | FRG2B                           | 0.00016398        | 0.000163977          | 0.304087           | -3.28853                     | T down vs N                            | 23.898  | 13.2733   | 8.88676    | 1         |
| cg08519385                                                                              | HAS1                            | 0.00014779        | 0.000147789          | 0.219324           | -4.55947                     | T down vs N                            | 24.402  | 21.5601   | 14.1368    | 1         |
| cg08520743                                                                              | PON3                            | 4.32E-05          | 4.32E-05             | 9.82991            | 9.82991                      | T up vs N                              | 30.9    | 48.9212   | 25.331     | 1         |
| cg08521684                                                                              | MUC4;MUC4;MUC4                  | 0.00465645        | 0.00465645           | 0.273407           | -3.65755                     | T down vs N                            | 10.797  | 15.7508   | 23.3421    | 1         |
| cg08526412                                                                              | C1orf83;TMEM59                  | 1.17E-05          | 1.17E-05             | 0.086771           | -11.5246                     | T down vs N                            | 38.978  | 55.9675   | 22.9737    | 1         |
| cg08526705                                                                              | MYC                             | 6.35E-06          | 6.35E-06             | 0.094357           | -10.598                      | T down vs N                            | 43.279  | 52.1952   | 19.2961    | 1         |
| cg08527127                                                                              | C1orf94;C1orf94                 | 0.00032549        | 0.000325491          | 0.253083           | -3.95128                     | T down vs N                            | 21.458  | 16.643    | 11.6341    | 1         |
| cg08529049                                                                              | CWH43                           | 0.00656367        | 0.00656367           | 3.90516            | 3.90516                      | T up vs N                              | 9.7497  | 17.3823   | 28.5256    | 1         |
| cg08530008                                                                              | KISS1                           | 0.00084755        | 0.000847547          | 0.218705           | -4.57236                     | T down vs N                            | 16.759  | 21.6404   | 20.6603    | 1         |
| cg08530036                                                                              | UBR4                            | 0.00018516        | 0.000185159          | 0.28613            | -3.49492                     | T down vs N                            | 23.317  | 14.6653   | 10.0634    | 1         |

| Probeset ID | UCSC_REFGENE_NAME                                                               | p-value<br>(Type) | p-value (T vs.<br>N) | Ratio (T<br>vs. N) | Fold-<br>Change (T<br>vs. N) | Fold-Change (T vs.<br>N) (Description) | F(Type) | SS (Type) | SS (Error) | F (Error) |
|-------------|---------------------------------------------------------------------------------|-------------------|----------------------|--------------------|------------------------------|----------------------------------------|---------|-----------|------------|-----------|
| cg08530497  | TET2;TET2                                                                       | 0.00036555        | 0.000365546          | 0.285856           | -3.49826                     | T down vs N                            | 20.226  | 14.6877   | 11.6189    | 1         |
| cg08533865  | ENGASE                                                                          | 2.30E-05          | 2.30E-05             | 10.2773            | 10.2773                      | T up vs N                              | 34.656  | 50.8454   | 23.4747    | 1         |
| cg08534181  | RABIF                                                                           | 7.22E-05          | 7.22E-05             | 0.247212           | -4.04511                     | T down vs N                            | 28.062  | 18.2924   | 10.4296    | 1         |
| cg08535918  | GNAO1;GNAO1                                                                     | 0.00014243        | 0.000142427          | 3.24958            | 3.24958                      | T up vs N                              | 24.583  | 13.0089   | 8.46707    | 1         |
| cg08536911  | OSGIN1;OSGIN1;OSGIN1                                                            | 8.23E-06          | 8.23E-06             | 0.310763           | -3.21788                     | T down vs N                            | 41.424  | 12.7934   | 4.9415     | 1         |
| cg08536961  | COL29A1;COL29A1                                                                 | 7.84E-05          | 7.84E-05             | 0.160851           | -6.21693                     | T down vs N                            | 27.626  | 31.2731   | 18.1126    | 1         |
| cg08537660  | TEAD1                                                                           | 0.0002874         | 0.000287403          | 0.276576           | -3.61565                     | T down vs N                            | 21.288  | 15.4722   | 11.6286    | 1         |
| cg08538682  | LXN;LXN;GFM1                                                                    | 7.38E-05          | 7.38E-05             | 5.28374            | 5.28374                      | T up vs N                              | 27.944  | 25.9537   | 14.8602    | 1         |
| cg08540622  | PLAC1L                                                                          | 1.53E-07          | 1.53E-07             | 0.210048           | -4.76082                     | T down vs N                            | 77.771  | 22.8058   | 4.69189    | 1         |
| cg08540953  | C7orf52                                                                         | 0.00016407        | 0.000164072          | 13.7321            | 13.7321                      | T up vs N                              | 23.895  | 64.28     | 43.042     | 1         |
| cg08542199  | C6orf208;C6orf122                                                               | 0.0008688         | 0.000868803          | 0.30339            | -3.29609                     | T down vs N                            | 16.663  | 13.3245   | 12.7947    | 1         |
| cg08542865  | SERPINB1                                                                        | 9.52E-05          | 9.52E-05             | 13.1768            | 13.1768                      | T up vs N                              | 26.613  | 62.2704   | 37.4381    | 1         |
| cg08547691  | NTN1                                                                            | 2.41E-05          | 2.41E-05             | 23.8579            | 23.8579                      | T up vs N                              | 34.35   | 94.2452   | 43.8984    | 1         |
| cg08549497  | WVVOX                                                                           | 9.06E-07          | 9.06E-07             | 0.190509           | -5.2491                      | T down vs N                            | 59.302  | 25.749    | 6.94725    | 1         |
| cg08551532  | DLL3;DLL3                                                                       | 0.00060364        | 0.000603643          | 5.39926            | 5.39926                      | T up vs N                              | 18.113  | 26.6325   | 23.5254    | 1         |
| cg08552043  | KCNQ1;KCNQ1                                                                     | 9.22E-06          | 9.22E-06             | 0.222559           | -4.49319                     | T down vs N                            | 40.628  | 62.2704   | 8.32755    | 1         |
| cg08552167  | INPP5A                                                                          | 0.00024221        | 0.000242209          | 0.147662           | -6.77223                     | T down vs N                            | 22.064  | 34.27     | 24.8511    | 1         |
| cg08554257  | NOD2                                                                            | 0.00026853        | 0.000268526          | 0.332213           | -3.01012                     | T down vs N                            | 21.594  | 11.3739   | 8.42727    | 1         |
| cg08554554  | ARFRP1;ARFRP1                                                                   | 0.00050413        | 0.000504129          | 0.306054           | -3.2674                      | T down vs N                            | 18.856  | 13.1299   | 11.141     | 1         |
| cg08555657  | SPRR2E                                                                          | 9.63E-06          | 9.63E-06             | 0.303996           | -3.28952                     | T down vs N                            | 40.326  | 13.28     | 5.26899    | 1         |
| cg08561071  | CYP2F1                                                                          | 0.00579939        | 0.00579939           | 0.328468           | -3.04444                     | T down vs N                            | 10.122  | 11.6091   | 18.3514    | 1         |
| cg08563982  | C6orf10                                                                         | 4.25E-05          | 4.25E-05             | 0.267333           | -3.74065                     | T down vs N                            | 31      | 16.3013   | 8.4136     | 1         |
| cg08564601  | MS4A4A                                                                          | 0.00507811        | 0.00507811           | 0.318434           | -3.14036                     | T down vs N                            | 10.528  | 12.2651   | 18.6407    | 1         |
| cg08567279  | LECT1;LECT1                                                                     | 4.62E-07          | 4.62E-07             | 68.2372            | 68.2372                      | T up vs N                              | 65.827  | 167.033   | 40.599     | 1         |
| cg08567760  | C20orf79                                                                        | 6.91E-05          | 6.91E-05             | 0.277106           | -3.60873                     | T down vs N                            | 28.3    | 15.4261   | 8.72143    | 1         |
| cg08569322  | IGF2R                                                                           | 0.0003719         | 0.000371901          | 0.329551           | -3.03443                     | T down vs N                            | 20.151  | 11.5406   | 9.16318    | 1         |
| cg08569979  | LOC646982;LOC646982;LOC646982                                                   | 0.00215112        | 0.00215112           | 0.304687           | -3.28206                     | T down vs N                            | 13.335  | 13.2293   | 15.8736    | 1         |
| cg08574227  | SPATA18                                                                         | 0.00011786        | 0.00011786           | 0.225001           | -4.44443                     | T down vs N                            | 25.523  | 20.8399   | 13.0645    | 1         |
| cg08574629  | RUSC1;C1orf104;RUSC1                                                            | 4.07E-06          | 4.07E-06             | 4.96982            | 4.96982                      | T up vs N                              | 46.593  | 24.0789   | 8.26859    | 1         |
| cg08575233  | HOXA11;HOXA10                                                                   | 5.93E-06          | 5.93E-06             | 0.242379           | -4.12577                     | T down vs N                            | 43.777  | 18.8129   | 6.87589    | 1         |
| cg08575708  | SNORD97;EIF4G2;EIF4G2                                                           | 0.0006804         | 0.000680401          | 0.326335           | -3.06434                     | T down vs N                            | 17.629  | 11.7454   | 10.6602    | 1         |
| cg08577913  | TRIM21                                                                          | 2.14E-05          | 2.14E-05             | 0.313212           | -3.19272                     | T down vs N                            | 35.094  | 12.6221   | 5.75466    | 1         |
| cg08578023  | CTSS;CTSS                                                                       | 4.44E-05          | 4.44E-05             | 0.305156           | -3.27701                     | T down vs N                            | 30.75   | 13.1951   | 6.86578    | 1         |
| cg08578320  | HLA-DRB1                                                                        | 0.00050612        | 0.000506119          | 8.82426            | 8.82426                      | T up vs N                              | 18.84   | 44.4099   | 37.7155    | 1         |
| cg08579858  | RASL10A;RASL10A                                                                 | 0.0002632         | 0.000263203          | 4.61505            | 4.61505                      | T up vs N                              | 21.685  | 21.9059   | 16.1629    | 1         |
| cg08580014  | PNLIPRP1                                                                        | 0.0035178         | 0.0035178            | 3.25623            | 3.25623                      | T up vs N                              | 11.688  | 13.054    | 17.8697    | 1         |
| cg08580380  | FAM122B;FAM122B;FAM122C;FAM122B;FAM122B;FAM122B                                 | 0.00015128        | 0.00015128           | 0.330578           | -3.02501                     | T down vs N                            | 24.288  | 11.476    | 7.55994    | 1         |
| cg08583277  | ANKRD11                                                                         | 4.14E-06          | 4.14E-06             | 5.71043            | 5.71043                      | T up vs N                              | 46.47   | 28.4318   | 9.78923    | 1         |
| cg08587864  | C1orf105;PIGC;PIGC                                                              | 1.59E-06          | 1.59E-06             | 0.248335           | -4.02683                     | T down vs N                            | 54.272  | 18.174    | 5.35795    | 1         |
| cg08592305  | MAST1                                                                           | 0.00041755        | 0.000417548          | 3.6018             | 3.6018                       | T up vs N                              | 19.653  | 15.3799   | 12.5215    | 1         |
| cg08593009  | SERPINA9;SERPINA9                                                               | 4.00E-05          | 4.00E-05             | 0.263314           | -3.79774                     | T down vs N                            | 31.345  | 16.6778   | 8.51315    | 1         |
| cg08594888  | KRT3                                                                            | 1.17E-06          | 1.17E-06             | 7.001              | 7.001                        | T up vs N                              | 56.995  | 35.4708   | 9.95757    | 1         |
| cg08594936  | C7orf16;C7orf16                                                                 | 0.00395709        | 0.00395709           | 0.31797            | -3.14495                     | T down vs N                            | 11.31   | 12.2964   | 17.3955    | 1         |
| cg08596308  | ATP6V1G2;NFKBIL1;NFKBIL1;NFKBIL1;                                               | 0.00246751        | 0.00246751           | 0.14662            | -6.82036                     | T down vs N                            | 12.865  | 34.5242   | 42.9389    | 1         |
| cg08597832  | TOP1MT                                                                          | 0.00280209        | 0.00280209           | 0.27012            | -3.70206                     | T down vs N                            | 12.436  | 16.046    | 20.644     | 1         |
| cg08599448  | ACP5;ACP5;ACP5;ACP5                                                             | 0.0001503         | 0.000150297          | 6.96781            | 6.96781                      | T up vs N                              | 24.32   | 35.2978   | 23.2225    | 1         |
| cg08599635  | WVVOX                                                                           | 8.06E-06          | 8.06E-06             | 4.18878            | 4.18878                      | T up vs N                              | 41.569  | 19.2175   | 7.39679    | 1         |
| cg08601673  | SLC9A3R2;SLC9A3R2                                                               | 6.44E-05          | 6.44E-05             | 0.289457           | -3.45475                     | T down vs N                            | 28.677  | 14.3956   | 8.03197    | 1         |
| cg08602500  | PTPRN2;PTPRN2;PTPRN2                                                            | 0.00040755        | 0.000407546          | 3.0485             | 3.0485                       | T up vs N                              | 19.756  | 11.6369   | 9.42436    | 1         |
| cg08603424  | CLYBL                                                                           | 9.24E-05          | 9.24E-05             | 0.179281           | -5.57783                     | T down vs N                            | 26.764  | 27.6702   | 16.542     | 1         |
| cg08605458  | KCNK3                                                                           | 8.08E-06          | 8.08E-06             | 0.287675           | -3.47615                     | T down vs N                            | 41.553  | 14.5394   | 5.59837    | 1         |
| cg08610281  | DTL                                                                             | 4.47E-05          | 4.47E-05             | 0.181066           | -5.52286                     | T down vs N                            | 30.704  | 27.3522   | 14.2534    | 1         |
| cg08610426  | IZUMO1                                                                          | 1.56E-05          | 1.56E-05             | 11.3472            | 11.3472                      | T up vs N                              | 37.114  | 55.2594   | 23.8225    | 1         |
| cg08611714  | KRT32                                                                           | 4.86E-07          | 4.86E-07             | 0.205445           | -4.86747                     | T down vs N                            | 65.315  | 23.4579   | 5.7464     | 1         |
| cg08616061  | PCDHGA4;PCDHGA1;PCDHGA6;PCDHGA5;PCDHGB1;PCDHGA3;PCDHGA2;PCDHGA6;PCDHGB2;PCDHGB3 | 2.30E-05          | 2.30E-05             | 5.61977            | 5.61977                      | T up vs N                              | 34.656  | 27.9119   | 12.8862    | 1         |
| cg08623215  | GPRC5B                                                                          | 6.71E-06          | 6.71E-06             | 4.68168            | 4.68168                      | T up vs N                              | 42.874  | 22.3184   | 8.32889    | 1         |
| cg08623223  | MTMR9                                                                           | 0.00023414        | 0.00023414           | 0.232402           | -4.30288                     | T down vs N                            | 22.22   | 19.9454   | 14.3622    | 1         |
| cg08623383  | C1orf38;C1orf38;C1orf38                                                         | 3.53E-06          | 3.53E-06             | 0.2735             | -3.65631                     | T down vs N                            | 47.701  | 15.7426   | 5.28045    | 1         |
| cg08626932  | GMEB2                                                                           | 0.00087561        | 0.00087561           | 0.25308            | -3.95133                     | T down vs N                            | 16.632  | 17.6835   | 17.0114    | 1         |
| cg08627089  | FGL1;FGL1;FGL1;FGL1                                                             | 0.00015184        | 0.000151839          | 0.324613           | -3.0806                      | T down vs N                            | 24.27   | 11.8566   | 7.81649    | 1         |
| cg08629043  | HDAC4                                                                           | 6.78E-05          | 6.78E-05             | 0.327902           | -3.04969                     | T down vs N                            | 28.397  | 11.6451   | 6.56135    | 1         |
| cg08630869  | MOGAT3                                                                          | 0.0040212         | 0.0040212            | 0.314165           | -3.18304                     | T down vs N                            | 11.259  | 12.5561   | 17.8437    | 1         |
| cg08631328  | ABC89;ABC89;ABC89                                                               | 0.00025359        | 0.000253593          | 0.300961           | -3.32269                     | T down vs N                            | 21.854  | 13.5047   | 9.88707    | 1         |
| cg08632909  | FADD                                                                            | 1.07E-05          | 1.07E-05             | 0.234573           | -4.26307                     | T down vs N                            | 39.623  | 19.692    | 7.95172    | 1         |
| cg08633745  | LOC284661                                                                       | 6.21E-06          | 6.21E-06             | 0.212259           | -4.71123                     | T down vs N                            | 43.433  | 22.5007   | 8.28887    | 1         |
| cg08634082  | OPN3                                                                            | 1.82E-05          | 1.82E-05             | 0.285848           | -3.49836                     | T down vs N                            | 36.103  | 14.6884   | 6.50951    | 1         |

| Probeset ID | UCSC_REFGENE_NAME                   | p-value<br>(Type) | p-value (T vs.<br>N) | Ratio (T<br>vs. N) | Fold-<br>Change (T<br>vs. N) | Fold-Change (T vs.<br>N) (Description) | F(Type) | SS (Type) | SS (Error) | F (Error) |
|-------------|-------------------------------------|-------------------|----------------------|--------------------|------------------------------|----------------------------------------|---------|-----------|------------|-----------|
| cg08635403  | C2orf202                            | 3.53E-05          | 3.53E-05             | 0.278573           | -3.58972                     | T down vs N                            | 32.075  | 15.2994   | 7.63169    | 1         |
| cg08637119  | MRGPRG;C11orf36                     | 1.39E-05          | 1.39E-05             | 0.257727           | -3.88007                     | T down vs N                            | 37.856  | 17.2182   | 7.27735    | 1         |
| cg08639389  | STIM2;STIM2;STIM2                   | 0.00065979        | 0.000659791          | 0.29318            | -3.41087                     | T down vs N                            | 17.753  | 14.1003   | 12.7083    | 1         |
| cg08640619  | KIRREL                              | 2.47E-06          | 2.47E-06             | 0.186086           | -5.37386                     | T down vs N                            | 50.559  | 26.4837   | 8.38105    | 1         |
| cg08640923  | TUBA4B;TUBA4A                       | 0.00263008        | 0.00263008           | 10.5089            | 10.5089                      | T up vs N                              | 12.649  | 51.8223   | 65.5523    | 1         |
| cg08641866  | TNFRSF18;TNFRSF18;TNFRSF18          | 0.00010716        | 0.000107156          | 7.92942            | 7.92942                      | T up vs N                              | 26.004  | 40.1555   | 24.7074    | 1         |
| cg08643128  | FBXO17;FBXO17                       | 0.00018643        | 0.000186428          | 0.292578           | -3.41789                     | T down vs N                            | 23.284  | 14.1476   | 9.72159    | 1         |
| cg08644973  | BAT5                                | 6.66E-05          | 6.66E-05             | 0.190665           | -5.24481                     | T down vs N                            | 28.494  | 25.7236   | 14.4446    | 1         |
| cg08645670  | FOXL1                               | 0.0002275         | 0.000227497          | 14.2667            | 14.2667                      | T up vs N                              | 22.353  | 66.1679   | 47.3629    | 1         |
| cg08646355  | STEAP2;STEAP2;STEAP2                | 4.01E-05          | 4.01E-05             | 0.305221           | -3.27631                     | T down vs N                            | 31.331  | 13.1904   | 6.73603    | 1         |
| cg08647349  | CAMTA1                              | 0.00516546        | 0.00516546           | 0.193182           | -5.17646                     | T down vs N                            | 10.475  | 25.318    | 38.6717    | 1         |
| cg08648317  | PLACL1;PLACL1                       | 2.19E-07          | 2.19E-07             | 0.153007           | -6.53563                     | T down vs N                            | 73.719  | 33.0077   | 7.16401    | 1         |
| cg08648568  | MOCOS                               | 0.0001134         | 0.000113402          | 8.9679             | 8.9679                       | T up vs N                              | 25.717  | 45.071    | 28.0415    | 1         |
| cg08649919  | CABIN1                              | 0.00218259        | 0.00218259           | 0.328665           | -3.04262                     | T down vs N                            | 13.285  | 11.5966   | 13.9671    | 1         |
| cg08650784  | GJB3;GJB3                           | 0.00018696        | 0.000186957          | 0.323759           | -3.08871                     | T down vs N                            | 23.271  | 11.9122   | 8.19023    | 1         |
| cg08651003  | GNB1                                | 0.00045372        | 0.000453716          | 3.83494            | 3.83494                      | T up vs N                              | 19.299  | 16.9223   | 14.0295    | 1         |
| cg08653945  | C16orf81                            | 0.00036009        | 0.000360092          | 0.255238           | -3.91792                     | T down vs N                            | 20.292  | 17.4656   | 13.7718    | 1         |
| cg08654443  | MATN4;MATN4;RBPJL;MATN4             | 1.01E-05          | 1.01E-05             | 4.79846            | 4.79846                      | T up vs N                              | 42.201  | 21.6814   | 7.70642    | 1         |
| cg08658621  | DPYSL4                              | 0.00151833        | 0.00151833           | 9.72268            | 9.72268                      | T up vs N                              | 14.567  | 48.4528   | 53.2188    | 1         |
| cg08659212  | NODAL                               | 0.00013689        | 0.000136893          | 3.24314            | 3.24314                      | T up vs N                              | 24.777  | 12.9651   | 8.37221    | 1         |
| cg08659394  | B3GNT9                              | 0.00060439        | 0.000604391          | 0.081408           | -12.2837                     | T down vs N                            | 21.217  | 44.8966   | 25.3924    | 1         |
| cg08659421  | IL32;IL32;IL32;IL32;IL32;IL32;IL32  | 4.33E-05          | 4.33E-05             | 0.133745           | -7.47694                     | T down vs N                            | 30.893  | 37.9089   | 19.6339    | 1         |
| cg08660395  | SLC39A7;RXRB;SLC39A7                | 0.0004929         | 0.000492899          | 0.200069           | -4.99829                     | T down vs N                            | 18.951  | 24.2507   | 20.4749    | 1         |
| cg08660562  | IRAK3;IRAK3                         | 0.00168071        | 0.00168071           | 0.216256           | -4.62414                     | T down vs N                            | 14.202  | 21.9623   | 24.743     | 1         |
| cg08666668  | WNT5A                               | 0.00336791        | 0.00336791           | 0.261055           | -3.8306                      | T down vs N                            | 11.83   | 16.8938   | 22.8494    | 1         |
| cg08667024  | TM4SF4                              | 3.79E-06          | 3.79E-06             | 0.254649           | -3.92697                     | T down vs N                            | 47.141  | 17.5247   | 5.94798    | 1         |
| cg08667128  | MIR193A                             | 7.13E-06          | 7.13E-06             | 40.0142            | 40.0142                      | T up vs N                              | 42.444  | 127.478   | 48.0544    | 1         |
| cg08667600  | RBMS3;RBMS3;RBMS3                   | 0.00015344        | 0.000153441          | 0.201584           | -4.96072                     | T down vs N                            | 24.219  | 24.0239   | 15.8712    | 1         |
| cg08670922  | EPHA3;EPHA3                         | 0.00095627        | 0.000956272          | 0.25771            | -3.88034                     | T down vs N                            | 16.292  | 17.2199   | 16.9118    | 1         |
| cg08672140  | LHFPL2                              | 0.00071563        | 0.00071563           | 0.329254           | -3.03717                     | T down vs N                            | 17.427  | 11.5593   | 10.613     | 1         |
| cg08672410  | RHBDF2;RHBDF2                       | 0.0029522         | 0.0029522            | 5.64511            | 5.64511                      | T up vs N                              | 12.263  | 28.0576   | 36.6086    | 1         |
| cg08672999  | ZNF836                              | 2.17E-05          | 2.17E-05             | 0.24399            | -4.09853                     | T down vs N                            | 35.001  | 18.6375   | 8.51975    | 1         |
| cg08675092  | PSMB8;PSMB8                         | 0.00091396        | 0.000913955          | 0.323398           | -3.09217                     | T down vs N                            | 16.466  | 11.9358   | 11.598     | 1         |
| cg08680415  | TUBB;MDC1                           | 0.00013194        | 0.000131935          | 0.330111           | -3.02928                     | T down vs N                            | 24.96   | 11.5053   | 7.37524    | 1         |
| cg08689075  | TEX28;TKTL1;TKTL1                   | 0.0017621         | 0.0017621            | 0.076881           | -13.007                      | T down vs N                            | 14.034  | 61.6457   | 70.2841    | 1         |
| cg08690379  | ECEL1P2                             | 3.98E-07          | 3.98E-07             | 0.256587           | -3.89732                     | T down vs N                            | 67.348  | 17.331    | 4.11739    | 1         |
| cg08690999  | NR2F1                               | 0.00739084        | 0.00739084           | 0.296466           | -3.37306                     | T down vs N                            | 9.399   | 13.8453   | 23.5689    | 1         |
| cg08691567  | KRT3                                | 6.04E-05          | 6.04E-05             | 6.47543            | 6.47543                      | T up vs N                              | 29.024  | 32.683    | 18.0169    | 1         |
| cg08691775  | NDRG1;NDRG1                         | 2.36E-05          | 2.36E-05             | 0.303149           | -3.29871                     | T down vs N                            | 34.483  | 13.3423   | 6.19083    | 1         |
| cg08692733  | RBM20                               | 7.77E-05          | 7.77E-05             | 0.166104           | -6.02031                     | T down vs N                            | 27.672  | 30.1827   | 17.4516    | 1         |
| cg08693271  | C12orf72;C12orf72;C12orf72          | 0.00101269        | 0.00101269           | 0.273752           | -3.65295                     | T down vs N                            | 16.072  | 15.7203   | 15.6498    | 1         |
| cg08693337  | NTSM                                | 8.20E-06          | 8.20E-06             | 0.293448           | -3.40776                     | T down vs N                            | 41.447  | 14.0793   | 5.43516    | 1         |
| cg08694699  | ESRP2                               | 6.44E-06          | 6.44E-06             | 6.43662            | 6.43662                      | T up vs N                              | 43.172  | 32.473    | 12.0348    | 1         |
| cg08695357  | RGMA;RGMA;RGMA;RGMA;RGMA            | 0.00046381        | 0.000463814          | 0.270108           | -3.70222                     | T down vs N                            | 19.206  | 16.0471   | 13.3683    | 1         |
| cg08695855  | COL1A2                              | 0.00475842        | 0.00475842           | 3.77153            | 3.77153                      | T up vs N                              | 10.729  | 16.5051   | 24.6138    | 1         |
| cg08698796  | CUGBP1                              | 0.00029867        | 0.000298667          | 0.280289           | -3.56775                     | T down vs N                            | 21.116  | 15.1527   | 11.4813    | 1         |
| cg08699828  | BCYRN1;ACRC                         | 0.002621          | 0.002621             | 0.267299           | -3.74112                     | T down vs N                            | 12.66   | 16.3044   | 20.6052    | 1         |
| cg08701134  | WWP2;WWP2                           | 0.00337377        | 0.00337377           | 0.240409           | -4.15959                     | T down vs N                            | 11.824  | 19.0303   | 25.7514    | 1         |
| cg08702941  | BEND4;BEND4                         | 3.42E-05          | 3.42E-05             | 0.273681           | -3.65389                     | T down vs N                            | 32.256  | 15.7265   | 7.80076    | 1         |
| cg08703857  | IQCE;IQCE                           | 0.00142254        | 0.00142254           | 0.330353           | -3.02706                     | T down vs N                            | 14.804  | 11.49     | 12.4184    | 1         |
| cg08704509  | GRAMD3;GRAMD3;GRAMD3;GRAMD3         | 0.00400448        | 0.00400448           | 0.324545           | -3.08123                     | T down vs N                            | 11.272  | 11.861    | 16.836     | 1         |
| cg08707540  | RIPK4                               | 0.00046249        | 0.000462487          | 0.267075           | -3.74427                     | T down vs N                            | 19.218  | 16.3252   | 13.5914    | 1         |
| cg08708778  | DPYSL3                              | 0.00093294        | 0.000932941          | 0.308594           | -3.24051                     | T down vs N                            | 16.387  | 12.9472   | 12.6418    | 1         |
| cg08709827  | AUTS2;AUTS2                         | 2.80E-05          | 2.80E-05             | 0.260085           | -3.84489                     | T down vs N                            | 33.442  | 16.9876   | 8.12746    | 1         |
| cg08710757  | C1QA                                | 0.0002627         | 0.000262698          | 0.270344           | -3.69899                     | T down vs N                            | 21.694  | 16.0257   | 11.8195    | 1         |
| cg08712631  | MAD1L1;MAD1L1;MAD1L1                | 0.0014225         | 0.0014225            | 0.320188           | -3.12317                     | T down vs N                            | 14.804  | 12.1477   | 13.129     | 1         |
| cg08713081  | GLO1                                | 8.17E-05          | 8.17E-05             | 0.092509           | -10.8098                     | T down vs N                            | 27.441  | 53.0738   | 30.9809    | 1         |
| cg08714590  | FZD1                                | 8.19E-07          | 8.19E-07             | 8.11573            | 8.11573                      | T up vs N                              | 60.241  | 41.0614   | 10.9059    | 1         |
| cg08716584  | MS4A7;MS4A7;MS4A7;MS4A7             | 0.00040145        | 0.000401447          | 0.205252           | -4.87206                     | T down vs N                            | 19.821  | 23.4859   | 18.9584    | 1         |
| cg08717880  | HOXD4;MIR10B                        | 0.00159253        | 0.00159253           | 5.17734            | 5.17734                      | T up vs N                              | 14.395  | 25.3232   | 28.1467    | 1         |
| cg08719608  | LOC389333                           | 6.65E-06          | 6.65E-06             | 3.31731            | 3.31731                      | T up vs N                              | 42.947  | 13.4682   | 5.01767    | 1         |
| cg08721338  | ELMO3                               | 3.96E-05          | 3.96E-05             | 6.51193            | 6.51193                      | T up vs N                              | 31.399  | 32.88     | 16.7545    | 1         |
| cg08722103  | P2RX2;P2RX2;P2RX2;P2RX2;P2RX2;P2RX2 | 0.00050615        | 0.000506152          | 0.29039            | -3.44365                     | T down vs N                            | 18.84   | 14.321    | 12.1624    | 1         |
| cg08726338  | PLEKHH2;LOC728819                   | 0.00027396        | 0.00027396           | 0.278036           | -3.59666                     | T down vs N                            | 21.504  | 15.3457   | 11.418     | 1         |
| cg08726522  | ST5;ST5;ST5                         | 5.11E-05          | 5.11E-05             | 0.257879           | -3.87778                     | T down vs N                            | 29.952  | 17.2032   | 9.18979    | 1         |
| cg08729686  | IGF1R                               | 0.00019528        | 0.000195276          | 0.142703           | -7.00756                     | T down vs N                            | 23.065  | 35.5049   | 24.6292    | 1         |
| cg08731009  | STK24;STK24                         | 0.00072258        | 0.00072258           | 0.307765           | -3.24923                     | T down vs N                            | 17.388  | 13.0065   | 11.9681    | 1         |
| cg08731543  | KRTAP7-1                            | 0.00038239        | 0.000382385          | 0.253734           | -3.94114                     | T down vs N                            | 20.031  | 17.6171   | 14.0721    | 1         |
| cg08732418  | DLL4                                | 0.00221664        | 0.00221664           | 0.309215           | -3.234                       | T down vs N                            | 13.231  | 12.903    | 15.6031    | 1         |

| Probeset ID                        | UCSC_REFGENE_NAME        | p-value<br>(Type) | p-value (T vs.<br>N) | Ratio (T<br>vs. N) | Fold-<br>Change (T<br>vs. N) | Fold-Change (T vs.<br>N) (Description) | F(Type) | SS (Type) | SS (Error) | F (Error) |
|------------------------------------|--------------------------|-------------------|----------------------|--------------------|------------------------------|----------------------------------------|---------|-----------|------------|-----------|
| cg08732950                         | CBFA2T3                  | 0.00025899        | 0.000258994          | 0.300834           | -3.32409                     | T down vs N                            | 21.758  | 13.5142   | 9.93765    | 1         |
| cg08733307                         | COL11A2;COL11A2;COL11A2  | 0.00015723        | 0.000157227          | 0.263025           | -3.80192                     | T down vs N                            | 24.101  | 16.7053   | 11.0903    | 1         |
| cg08737770                         | ZFPM2                    | 1.91E-05          | 1.91E-05             | 0.215587           | -4.6385                      | T down vs N                            | 35.792  | 22.0513   | 9.85765    | 1         |
| cg08739433                         | WNT2B;WNT2B              | 8.60E-05          | 8.60E-05             | 6.19609            | 6.19609                      | T up vs N                              | 27.141  | 31.1582   | 18.3683    | 1         |
| cg08742502                         | PRDM1;PRDM1              | 9.29E-08          | 9.29E-08             | 0.149998           | -6.66674                     | T down vs N                            | 83.76   | 33.7098   | 6.43929    | 1         |
| cg08745451                         | BEND6                    | 0.00249074        | 0.00249074           | 0.308166           | -3.245                       | T down vs N                            | 12.833  | 12.9778   | 16.1809    | 1         |
| cg08746049                         | MUC5B                    | 0.00128481        | 0.00128481           | 0.315044           | -3.17416                     | T down vs N                            | 15.178  | 12.4956   | 13.1723    | 1         |
| cg08746900                         | IRX1                     | 8.44E-05          | 8.44E-05             | 0.328229           | -3.04666                     | T down vs N                            | 28.393  | 10.9405   | 5.77982    | 1         |
| cg08746986                         | RELN;RELN                | 7.52E-05          | 7.52E-05             | 0.250664           | -3.9894                      | T down vs N                            | 27.845  | 17.9312   | 10.3033    | 1         |
| cg08747557                         | MMP8                     | 0.00017065        | 0.000170653          | 0.303161           | -3.29857                     | T down vs N                            | 23.706  | 13.3413   | 9.00459    | 1         |
| cg08748098                         | WWOX                     | 0.00058585        | 0.000585851          | 3.07636            | 3.07636                      | T up vs N                              | 18.235  | 11.8276   | 10.3777    | 1         |
| cg08751950                         | EIF3B;EIF3B              | 0.0013096         | 0.0013096            | 0.268538           | -3.72387                     | T down vs N                            | 15.108  | 16.1904   | 17.1469    | 1         |
| cg08751994                         | DYNC1I1;DYNC1I1;DYNC1I1  | 0.00011371        | 0.000113712          | 0.271899           | -3.67784                     | T down vs N                            | 25.703  | 15.8855   | 9.88867    | 1         |
| cg08752433                         | PPTC7                    | 0.00027934        | 0.000279338          | 0.327384           | -3.05452                     | T down vs N                            | 21.416  | 11.6782   | 8.7247     | 1         |
| cg08752459                         | CLEC2B                   | 9.26E-08          | 9.26E-08             | 0.115545           | -8.65463                     | T down vs N                            | 90.996  | 41.0557   | 6.76772    | 1         |
| cg08754067                         | SNORD72;RPL37            | 7.96E-07          | 7.96E-07             | 0.249872           | -4.00205                     | T down vs N                            | 60.509  | 18.0133   | 4.76313    | 1         |
| cg08754088                         | UNC5D                    | 4.67E-06          | 4.67E-06             | 0.213664           | -4.68024                     | T down vs N                            | 45.557  | 22.3095   | 7.83527    | 1         |
| cg08754149                         | C10orf11                 | 0.00051362        | 0.000513621          | 0.326391           | -3.06381                     | T down vs N                            | 18.779  | 11.7418   | 10.0044    | 1         |
| cg08755784                         | GSG1L;GSG1L              | 0.00084474        | 0.000844736          | 0.222241           | -4.49962                     | T down vs N                            | 16.772  | 21.1862   | 20.211     | 1         |
| cg08756441                         | IHH                      | 3.77E-06          | 3.77E-06             | 0.319444           | -3.13043                     | T down vs N                            | 47.184  | 12.1973   | 4.13611    | 1         |
| cg08757448                         | C10orf32;C10orf32        | 0.00054051        | 0.000540511          | 3.04537            | 3.04537                      | T up vs N                              | 18.567  | 11.6155   | 10.0096    | 1         |
| cg08761659                         | OR1F1                    | 9.82E-05          | 9.82E-05             | 0.301594           | -3.31571                     | T down vs N                            | 26.451  | 13.4575   | 8.14036    | 1         |
| cg08763351                         | SPRR4                    | 0.0064525         | 0.0064525            | 0.241444           | -4.14175                     | T down vs N                            | 9.8007  | 18.9157   | 30.8807    | 1         |
| ZNF438;ZNF438;ZNF438;ZNF438;ZNF438 |                          |                   |                      |                    |                              |                                        |         |           |            |           |
| cg08764162                         | 38;ZNF438;ZNF438;ZNF438  | 1.27E-05          | 1.27E-05             | 0.212              | -4.71699                     | T down vs N                            | 38.475  | 22.5362   | 9.37175    | 1         |
| cg08764761                         | SNORD115-42;SNORD115-10  | 0.00036443        | 0.000364434          | 0.310318           | -3.2225                      | T down vs N                            | 20.239  | 12.8248   | 10.1385    | 1         |
| cg08764927                         | PER3;PER3                | 5.30E-06          | 5.30E-06             | 3.78602            | 3.78602                      | T up vs N                              | 44.6    | 16.6006   | 5.95533    | 1         |
| cg08766170                         | WBSR17                   | 0.00060632        | 0.00060632           | 0.287897           | -3.47347                     | T down vs N                            | 18.095  | 14.5214   | 12.84      | 1         |
| cg08767627                         | NPY1R                    | 0.00052849        | 0.00052849           | 0.238726           | -4.1889                      | T down vs N                            | 18.66   | 19.2182   | 16.4786    | 1         |
| cg08772028                         | AMICA1                   | 1.95E-05          | 1.95E-05             | 0.244443           | -4.09093                     | T down vs N                            | 35.682  | 18.5885   | 8.33525    | 1         |
| cg08781710                         | MEFV                     | 3.19E-05          | 3.19E-05             | 0.18566            | -5.3862                      | T down vs N                            | 32.664  | 26.5561   | 13.008     | 1         |
| cg08781728                         | NPM2                     | 1.72E-05          | 1.72E-05             | 17.1419            | 17.1419                      | T up vs N                              | 36.463  | 75.6248   | 33.1841    | 1         |
| cg08784129                         | PAX6;PAX6;PAX6           | 0.00325011        | 0.00325011           | 3.53752            | 3.53752                      | T up vs N                              | 11.946  | 14.9507   | 20.0245    | 1         |
| cg08785166                         | KRTAP4-1                 | 0.00021464        | 0.000214637          | 0.247873           | -4.03433                     | T down vs N                            | 22.623  | 18.2226   | 12.8881    | 1         |
| cg08786003                         | FCRL3                    | 2.86E-05          | 2.86E-05             | 0.162234           | -6.16395                     | T down vs N                            | 33.322  | 30.9807   | 14.8756    | 1         |
| cg08792812                         | ANXA4                    | 0.00041622        | 0.000416222          | 0.235908           | -4.23894                     | T down vs N                            | 19.666  | 19.5382   | 15.8959    | 1         |
| cg08792995                         | SCML4                    | 3.79E-05          | 3.79E-05             | 0.277621           | -3.60203                     | T down vs N                            | 31.65   | 15.3814   | 7.7758     | 1         |
| cg08794265                         | CES4                     | 2.64E-07          | 2.64E-07             | 0.229272           | -4.36162                     | T down vs N                            | 71.691  | 20.3177   | 4.53451    | 1         |
| cg08797518                         | ILDR1                    | 3.72E-05          | 3.72E-05             | 0.244908           | -4.08317                     | T down vs N                            | 31.759  | 18.5384   | 9.33962    | 1         |
| cg08800499                         | HDX                      | 2.59E-05          | 2.59E-05             | 0.278564           | -3.58984                     | T down vs N                            | 33.922  | 15.3002   | 7.21665    | 1         |
| cg08800878                         | EMX1                     | 0.00103051        | 0.00103051           | 0.194242           | -5.14821                     | T down vs N                            | 16.006  | 25.1497   | 25.1409    | 1         |
| cg08804537                         | MUC2                     | 0.00452867        | 0.00452867           | 0.271383           | -3.68483                     | T down vs N                            | 10.884  | 15.9318   | 23.4216    | 1         |
| cg08805748                         | ABCF1;ABCF1              | 0.00025115        | 0.000251151          | 0.191014           | -5.23521                     | T down vs N                            | 21.898  | 25.6668   | 18.7534    | 1         |
| cg08809223                         | POU5F1;POU5F1            | 0.00033495        | 0.000334949          | 0.331626           | -3.01544                     | T down vs N                            | 20.608  | 11.4104   | 8.85883    | 1         |
| cg08811888                         | CBX6                     | 2.21E-07          | 2.21E-07             | 3.74877            | 3.74877                      | T up vs N                              | 73.637  | 16.3549   | 3.55364    | 1         |
| cg08816098                         | MIR518F                  | 8.23E-05          | 8.23E-05             | 0.295538           | -3.38366                     | T down vs N                            | 27.366  | 13.9168   | 8.13673    | 1         |
| cg08816443                         | LMF1                     | 0.00017766        | 0.00017766           | 0.134229           | -7.44994                     | T down vs N                            | 23.514  | 37.7727   | 25.7029    | 1         |
| cg08821656                         | ZBED3                    | 0.00023784        | 0.000237844          | 9.38658            | 9.38658                      | T up vs N                              | 22.148  | 46.9655   | 33.929     | 1         |
| cg08821738                         | C1QTNF1;C1QTNF1;C1QTNF1  | 0.00189268        | 0.00189268           | 0.31693            | -3.15527                     | T down vs N                            | 13.781  | 12.3668   | 14.3581    | 1         |
| cg08826184                         | NELL2;NELL2;NELL2;NELL2  | 2.27E-05          | 2.27E-05             | 0.312793           | -3.197                       | T down vs N                            | 34.734  | 12.6513   | 5.82768    | 1         |
| cg08828286                         | CFD;CFD                  | 0.00020788        | 0.000207878          | 0.323644           | -3.08981                     | T down vs N                            | 22.772  | 11.9197   | 8.37506    | 1         |
| cg08828819                         | PON3                     | 1.78E-05          | 1.78E-05             | 8.95632            | 8.95632                      | T up vs N                              | 36.268  | 45.0179   | 19.8601    | 1         |
| cg08828886                         | CHFR;CHFR;CHFR;CHFR;CHFR | 6.96E-05          | 6.96E-05             | 0.330596           | -3.02484                     | T down vs N                            | 28.26   | 11.4748   | 6.4967     | 1         |
| cg08829007                         | KIAA0748;KIAA0748        | 0.0022509         | 0.0022509            | 0.325727           | -3.07005                     | T down vs N                            | 13.178  | 11.7845   | 14.3077    | 1         |
| cg08830672                         | ATP6V0D1                 | 3.14E-06          | 3.14E-06             | 0.146807           | -6.81165                     | T down vs N                            | 48.62   | 34.4783   | 11.3461    | 1         |
| cg08831077                         | HRH1                     | 0.00035982        | 0.000359822          | 0.278917           | -3.5853                      | T down vs N                            | 20.295  | 15.2699   | 12.0385    | 1         |
| cg08831080                         | FBXO40                   | 0.00023274        | 0.000232741          | 0.23551            | -4.24611                     | T down vs N                            | 22.247  | 19.5839   | 14.0844    | 1         |
| cg08832220                         | WNT5A                    | 0.00028157        | 0.000281565          | 3.59351            | 3.59351                      | T up vs N                              | 21.381  | 15.3246   | 11.4681    | 1         |
| cg08832227                         | KCNA1                    | 5.57E-05          | 5.57E-05             | 6.60811            | 6.60811                      | T up vs N                              | 29.477  | 33.3966   | 18.1278    | 1         |
| cg08833010                         | FAM53A                   | 3.53E-05          | 3.53E-05             | 0.298365           | -3.3516                      | T down vs N                            | 32.069  | 13.7003   | 6.83548    | 1         |
| cg08834050                         | CUL7;CUL7;MRPL2          | 0.0002069         | 0.000206898          | 0.301602           | -3.31562                     | T down vs N                            | 22.794  | 13.4569   | 9.44594    | 1         |
| cg08835915                         | ZSCAN5B                  | 0.00055681        | 0.000556814          | 0.282359           | -3.54159                     | T down vs N                            | 18.444  | 14.9779   | 12.9931    | 1         |
| cg08836009                         | ANKRD24                  | 9.59E-05          | 9.59E-05             | 0.309187           | -3.23429                     | T down vs N                            | 26.574  | 12.905    | 7.77011    | 1         |
| cg08836542                         | FOSL2                    | 0.00077435        | 0.000774348          | 0.309755           | -3.22835                     | T down vs N                            | 17.632  | 12.1079   | 10.3003    | 1         |
| cg08836954                         | SQSTM1;SQSTM1;MGAT4B     | 0.00021761        | 0.000217606          | 0.30117            | -3.32038                     | T down vs N                            | 22.559  | 13.489    | 9.56729    | 1         |
| cg08837884                         | LRG1                     | 2.06E-05          | 2.06E-05             | 0.169379           | -5.90391                     | T down vs N                            | 35.321  | 29.5297   | 13.3765    | 1         |
| cg08839697                         | FRG2C                    | 4.30E-06          | 4.30E-06             | 0.220548           | -4.53415                     | T down vs N                            | 46.184  | 21.4021   | 7.41457    | 1         |
| cg08842232                         | KIAA1486                 | 0.00571798        | 0.00571798           | 0.304915           | -3.2796                      | T down vs N                            | 10.165  | 13.2127   | 20.7982    | 1         |
| cg08843283                         | LOC100128071;TSSK3       | 3.20E-06          | 3.20E-06             | 10.7999            | 10.7999                      | T up vs N                              | 48.471  | 53.0331   | 17.506     | 1         |
| cg08843513                         | TMEM43;CHCHD4;CHCHD4     | 2.39E-05          | 2.39E-05             | 0.295153           | -3.38807                     | T down vs N                            | 34.412  | 13.9466   | 6.48454    | 1         |
| cg08843517                         | CYBA                     | 1.21E-05          | 1.21E-05             | 10.6893            | 10.6893                      | T up vs N                              | 38.784  | 52.5751   | 21.6893    | 1         |
| cg08843537                         | C1orf170                 | 0.00160327        | 0.00160327           | 0.300157           | -3.33159                     | T down vs N                            | 14.371  | 13.565    | 15.1028    | 1         |

| Probeset ID                                                     | UCSC_REFGENE_NAME            | p-value<br>(Type) | p-value (T vs.<br>N) | Ratio (T<br>vs. N) | Fold-<br>Change (T<br>vs. N) | Fold-Change (T vs.<br>N) (Description) | F(Type) | SS (Type) | SS (Error) | F (Error) |
|-----------------------------------------------------------------|------------------------------|-------------------|----------------------|--------------------|------------------------------|----------------------------------------|---------|-----------|------------|-----------|
| cg08843769                                                      | FAM27L                       | 1.82E-06          | 1.82E-06             | 0.305896           | -3.26908                     | T down vs N                            | 53.098  | 13.1413   | 3.9599     | 1         |
| cg08844169                                                      | TMEM39A                      | 0.00070232        | 0.000702317          | 0.276659           | -3.61456                     | T down vs N                            | 17.502  | 15.4649   | 14.138     | 1         |
| cg08844501                                                      | KLK14                        | 0.00457501        | 0.00457501           | 0.225747           | -4.42973                     | T down vs N                            | 10.852  | 20.7475   | 30.5907    | 1         |
| cg08845025                                                      | TNXB                         | 2.05E-06          | 2.05E-06             | 0.234069           | -4.27224                     | T down vs N                            | 52.104  | 19.7505   | 6.06495    | 1         |
| cg08846853                                                      | PLEKHG4B                     | 0.00081773        | 0.000817725          | 0.310797           | -3.21753                     | T down vs N                            | 16.899  | 12.791    | 12.1104    | 1         |
| cg08850264                                                      | OR4B1                        | 2.80E-05          | 2.80E-05             | 0.103192           | -9.69068                     | T down vs N                            | 33.435  | 48.3124   | 23.1191    | 1         |
| PCDHGA4;PCDHGA9;PCDHGA1;PCDHG<br>B1;PCDHGB6;PCDHGB6;PCDHGB3;PCD |                              |                   |                      |                    |                              |                                        |         |           |            |           |
| cg08854987                                                      | HGA6;PCDHGA8;PCDHGA5;PCDHGB4 | 7.53E-05          | 7.53E-05             | 3.32719            | 3.32719                      | T up vs N                              | 27.842  | 13.5352   | 7.7783     | 1         |
| cg08855551                                                      | CSN1S2B                      | 0.00139238        | 0.00139238           | 0.254076           | -3.93583                     | T down vs N                            | 14.882  | 17.5825   | 18.903     | 1         |
| cg08857797                                                      | VPS25                        | 0.00308286        | 0.00308286           | 0.316321           | -3.16135                     | T down vs N                            | 12.12   | 12.4082   | 16.3812    | 1         |
| cg08858201                                                      | DNM1;DNM1                    | 2.98E-05          | 2.98E-05             | 6.60914            | 6.60914                      | T up vs N                              | 33.076  | 33.4021   | 16.1577    | 1         |
| cg08859190                                                      | RFX4                         | 0.00253757        | 0.00253757           | 3.53006            | 3.53006                      | T up vs N                              | 12.77   | 14.9008   | 18.6703    | 1         |
| cg08859411                                                      | HCG26                        | 0.00014495        | 0.000144948          | 0.293607           | -3.40591                     | T down vs N                            | 24.497  | 14.0669   | 9.18779    | 1         |
| cg08860610                                                      | PSG1                         | 1.12E-05          | 1.12E-05             | 0.242168           | -4.12937                     | T down vs N                            | 39.299  | 18.8361   | 7.66876    | 1         |
| cg08864283                                                      | C16orf11                     | 0.00035421        | 0.000354206          | 0.21781            | -4.59116                     | T down vs N                            | 20.363  | 21.7574   | 17.0953    | 1         |
| cg08867933                                                      | MIR1179                      | 0.00013117        | 0.000131166          | 0.287675           | -3.47615                     | T down vs N                            | 24.989  | 14.5394   | 9.30939    | 1         |
| cg08868352                                                      | TEX14;TEX14                  | 0.00280996        | 0.00280996           | 3.26841            | 3.26841                      | T up vs N                              | 12.427  | 13.1368   | 16.9138    | 1         |
| cg08869547                                                      | KIF7                         | 0.00037428        | 0.000374281          | 0.244513           | -4.08976                     | T down vs N                            | 20.124  | 18.5809   | 14.7735    | 1         |
| cg08870587                                                      | SHANK2;SHANK2                | 3.99E-05          | 3.99E-05             | 0.329875           | -3.03145                     | T down vs N                            | 31.363  | 11.5201   | 5.87714    | 1         |
| cg08871239                                                      | MRPS5                        | 0.00020016        | 0.000200156          | 0.137785           | -7.25771                     | T down vs N                            | 22.949  | 36.7957   | 25.6537    | 1         |
| cg08871573                                                      | MXRA5                        | 0.00228186        | 0.00228186           | 0.267337           | -3.74059                     | T down vs N                            | 13.132  | 16.3009   | 19.8618    | 1         |
| cg08872493                                                      | HTR1D                        | 1.20E-05          | 1.20E-05             | 0.23802            | -4.20133                     | T down vs N                            | 38.823  | 19.2978   | 7.95312    | 1         |
| cg08872590                                                      | LRRC24;LRRC14                | 0.00034614        | 0.000346136          | 6.9503             | 6.9503                       | T up vs N                              | 20.464  | 35.2063   | 27.5262    | 1         |
| cg08872937                                                      | NKIRAS1;RPL15;NKIRAS1        | 0.00254724        | 0.00254724           | 3.06412            | 3.06412                      | T up vs N                              | 12.757  | 11.7439   | 14.7296    | 1         |
| cg08873940                                                      | CTU1                         | 1.16E-05          | 1.16E-05             | 7.69838            | 7.69838                      | T up vs N                              | 39.067  | 39.0168   | 15.9796    | 1         |
| cg08874512                                                      | IGLON5                       | 0.00077351        | 0.000773514          | 3.45519            | 3.45519                      | T up vs N                              | 17.118  | 14.3985   | 13.4582    | 1         |
| cg08876130                                                      | KCNH3                        | 0.00022756        | 0.000227557          | 3.13036            | 3.13036                      | T up vs N                              | 22.351  | 12.1968   | 8.73094    | 1         |
| cg08877512                                                      | ABAT;ABAT;ABAT               | 7.64E-06          | 7.64E-06             | 0.267515           | -3.73811                     | T down vs N                            | 41.952  | 16.2845   | 6.21069    | 1         |
| cg08878368                                                      | SALL1;SALL1                  | 6.94E-05          | 6.94E-05             | 0.110768           | -9.02787                     | T down vs N                            | 28.278  | 45.3452   | 25.6571    | 1         |
| cg08878744                                                      | LCE1B                        | 0.00594356        | 0.00594356           | 0.295623           | -3.38269                     | T down vs N                            | 10.047  | 13.9103   | 22.1515    | 1         |
| cg08879470                                                      | MYO7A;MYO7A;MYO7A            | 1.80E-05          | 1.80E-05             | 5.40262            | 5.40262                      | T up vs N                              | 36.189  | 26.6522   | 11.7837    | 1         |
| cg08879559                                                      | SPARC;SPARC                  | 1.65E-05          | 1.65E-05             | 0.320408           | -3.12102                     | T down vs N                            | 36.737  | 12.133    | 5.2843     | 1         |
| cg08880849                                                      | HSPB9;KAT2A                  | 9.58E-07          | 9.58E-07             | 15.7243            | 15.7243                      | T up vs N                              | 58.792  | 71.1001   | 19.3497    | 1         |
| cg08881019                                                      | LMNA;LMNA;LMNA               | 4.81E-06          | 4.81E-06             | 0.31052            | -3.2204                      | T down vs N                            | 45.333  | 12.8105   | 4.52142    | 1         |
| cg08883853                                                      | CYP2W1                       | 0.00189131        | 0.00189131           | 0.188514           | -5.30465                     | T down vs N                            | 13.784  | 26.077    | 30.2704    | 1         |
| cg08884395                                                      | ESR1;ESR1;ESR1;ESR1          | 0.00504351        | 0.00504351           | 0.291516           | -3.43035                     | T down vs N                            | 10.549  | 14.2315   | 21.5859    | 1         |
| cg08885114                                                      | ERICH1                       | 0.00228451        | 0.00228451           | 0.330768           | -3.02326                     | T down vs N                            | 13.128  | 11.464    | 13.9725    | 1         |
| cg08885927                                                      | IGSF21                       | 9.19E-05          | 9.19E-05             | 0.306938           | -3.25799                     | T down vs N                            | 26.791  | 13.066    | 7.80332    | 1         |
| cg08886154                                                      | PAX4                         | 9.92E-07          | 9.92E-07             | 0.251365           | -3.97827                     | T down vs N                            | 58.465  | 17.8588   | 4.88739    | 1         |
| cg08891047                                                      | OR8U8;OR5M11                 | 0.00100738        | 0.00100738           | 0.238863           | -4.18651                     | T down vs N                            | 16.092  | 19.2029   | 19.093     | 1         |
| cg08892386                                                      | LPGAT1                       | 3.40E-05          | 3.40E-05             | 0.261158           | -3.82911                     | T down vs N                            | 32.295  | 16.884    | 8.3649     | 1         |
| cg08894487                                                      | ARID3A                       | 8.58E-05          | 8.58E-05             | 0.104739           | -9.54752                     | T down vs N                            | 27.151  | 47.6813   | 28.0987    | 1         |
| cg08894663                                                      | FER                          | 9.60E-06          | 9.60E-06             | 0.21507            | -4.64964                     | T down vs N                            | 40.348  | 22.1203   | 8.77174    | 1         |
| cg08895932                                                      | LCE1C                        | 0.00021897        | 0.000218971          | 0.193278           | -5.17389                     | T down vs N                            | 22.53   | 25.3027   | 17.9694    | 1         |
| cg08896939                                                      | RNF135;RNF135                | 0.00027641        | 0.00027641           | 4.47216            | 4.47216                      | T up vs N                              | 21.464  | 21.0141   | 15.6648    | 1         |
| cg08898155                                                      | PON3                         | 0.00012827        | 0.000128273          | 5.42485            | 5.42485                      | T up vs N                              | 25.099  | 26.7821   | 17.0726    | 1         |
| cg08898349                                                      | TRUB1                        | 4.89E-06          | 4.89E-06             | 0.268561           | -3.72354                     | T down vs N                            | 45.213  | 16.1882   | 5.72871    | 1         |
| cg08900409                                                      | PGPEP1                       | 0.00014526        | 0.000145264          | 0.201189           | -4.97044                     | T down vs N                            | 24.486  | 24.0827   | 15.7365    | 1         |
| cg08901098                                                      | ARSG                         | 0.00094135        | 0.000941346          | 0.286541           | -3.4899                      | T down vs N                            | 16.352  | 14.6317   | 14.3167    | 1         |
| cg08905487                                                      | LAIR2;LAIR2                  | 0.00056901        | 0.000569012          | 0.239095           | -4.18245                     | T down vs N                            | 18.355  | 19.1769   | 16.7164    | 1         |
| cg08906246                                                      | STK32B                       | 2.16E-05          | 2.16E-05             | 0.200507           | -4.98736                     | T down vs N                            | 35.042  | 24.1849   | 11.0425    | 1         |
| cg08907436                                                      | ESR1;ESR1                    | 0.00077938        | 0.00077938           | 0.212132           | -4.71405                     | T down vs N                            | 17.088  | 22.5181   | 21.0843    | 1         |
| cg08908247                                                      | YIF1A                        | 4.39E-06          | 4.39E-06             | 0.308683           | -3.23957                     | T down vs N                            | 46.027  | 12.9409   | 4.49856    | 1         |
| cg08911862                                                      | IL23A                        | 0.00056487        | 0.000564873          | 0.292346           | -3.4206                      | T down vs N                            | 18.385  | 14.1658   | 12.3282    | 1         |
| cg08912922                                                      | SHROOM1                      | 2.04E-05          | 2.04E-05             | 3.00619            | 3.00619                      | T up vs N                              | 35.404  | 11.3469   | 5.12793    | 1         |
| cg08914926                                                      | CLIP1;CLIP1                  | 0.00082861        | 0.000828606          | 0.266125           | -3.75764                     | T down vs N                            | 16.847  | 16.4135   | 15.5879    | 1         |
| cg08917933                                                      | AKR7A3                       | 2.89E-05          | 2.89E-05             | 3.43142            | 3.43142                      | T up vs N                              | 33.259  | 14.2387   | 6.8499     | 1         |
| cg08918576                                                      | OR6K3                        | 0.00136808        | 0.00136808           | 0.315827           | -3.16629                     | T down vs N                            | 14.947  | 12.4419   | 13.3187    | 1         |
| cg08918985                                                      | TCHHL1;TCHHL1                | 4.45E-06          | 4.45E-06             | 0.153102           | -6.53161                     | T down vs N                            | 45.914  | 32.986    | 11.4948    | 1         |
| cg08922308                                                      | MIR492                       | 0.0012645         | 0.0012645            | 0.270401           | -3.69822                     | T down vs N                            | 15.237  | 16.0206   | 16.8227    | 1         |
| cg08922317                                                      | APOA2                        | 2.32E-05          | 2.32E-05             | 0.272167           | -3.67421                     | T down vs N                            | 34.584  | 15.8614   | 7.33826    | 1         |
| cg08925882                                                      | GSTP1                        | 7.68E-06          | 7.68E-06             | 0.211138           | -4.73625                     | T down vs N                            | 41.912  | 22.6548   | 8.64847    | 1         |
| cg08927844                                                      | CNKSR3                       | 0.00059451        | 0.00059451           | 0.189363           | -5.28087                     | T down vs N                            | 18.175  | 25.9368   | 22.8324    | 1         |
| cg08929002                                                      | NR2E1                        | 0.00042561        | 0.000425613          | 0.189822           | -5.2681                      | T down vs N                            | 19.571  | 25.8613   | 21.1428    | 1         |
| cg08929133                                                      | AHSG                         | 0.00361093        | 0.00361093           | 0.278485           | -3.59086                     | T down vs N                            | 11.604  | 15.307    | 21.1064    | 1         |
| cg08930131                                                      | COL23A1                      | 0.00014974        | 0.000149741          | 4.57763            | 4.57763                      | T up vs N                              | 24.338  | 21.6732   | 14.2483    | 1         |
| cg08933467                                                      | FCRL1;FCRL1;FCRL1            | 5.98E-05          | 5.98E-05             | 0.259196           | -3.85808                     | T down vs N                            | 29.08   | 17.0741   | 9.39442    | 1         |
| cg08934830                                                      | BBX;BBX                      | 0.00261784        | 0.00261784           | 4.20856            | 4.20856                      | T up vs N                              | 12.665  | 19.3441   | 24.4388    | 1         |
| cg08935864                                                      | ACSF3;ACSF3;ACSF3            | 0.00053597        | 0.000535969          | 0.185068           | -5.40343                     | T down vs N                            | 18.602  | 26.6569   | 22.9284    | 1         |
| cg08936487                                                      | TUBB2B                       | 4.44E-05          | 4.44E-05             | 0.218947           | -4.56732                     | T down vs N                            | 30.739  | 21.609    | 11.2478    | 1         |

| Probeset ID | UCSC_REFGENE_NAME                                                                               | p-value<br>(Type) | p-value (T vs.<br>N) | Ratio (T<br>vs. N) | Fold-<br>Change (T<br>vs. N) | Fold-Change (T vs.<br>N) (Description) | F(Type) | SS (Type) | SS (Error) | F (Error) |
|-------------|-------------------------------------------------------------------------------------------------|-------------------|----------------------|--------------------|------------------------------|----------------------------------------|---------|-----------|------------|-----------|
| cg08936706  | MYL3                                                                                            | 5.83E-05          | 5.83E-05             | 0.325278           | -3.07429                     | T down vs N                            | 29.224  | 11.8135   | 6.46777    | 1         |
| cg08938584  | PCDHGA4;PCDHGA9;PCDHGA1;PCDHG<br>B1;PCDHGB7;PCDHGB6;PCDHGB3;PCD<br>HGA6;PCDHGA8;PCDHGA10;PCDHGA | 6.33E-05          | 6.33E-05             | 3.85158            | 3.85158                      | T up vs N                              | 28.768  | 17.0315   | 9.47242    | 1         |
| cg08939418  | IGF2BP3                                                                                         | 8.14E-07          | 8.14E-07             | 0.24006            | -4.16563                     | T down vs N                            | 60.306  | 19.069    | 5.05925    | 1         |
| cg08940570  | LOXL3;DOK1                                                                                      | 1.80E-05          | 1.80E-05             | 0.186019           | -5.3758                      | T down vs N                            | 36.197  | 26.4951   | 11.7114    | 1         |
| cg08941355  | HOXA1;HOXA1                                                                                     | 3.49E-05          | 3.49E-05             | 6.01514            | 6.01514                      | T up vs N                              | 32.138  | 30.1538   | 15.0124    | 1         |
| cg08941457  | LOC284798;LOC284798;LOC284798<br>C11orf49;C11orf49;C11orf49;C11orf4                             | 0.00022625        | 0.000226248          | 5.69823            | 5.69823                      | T up vs N                              | 22.378  | 28.3621   | 20.2785    | 1         |
| cg08941576  | 9                                                                                               | 2.02E-06          | 2.02E-06             | 0.189594           | -5.27444                     | T down vs N                            | 52.221  | 25.8988   | 7.93511    | 1         |
| cg08943714  | HECA                                                                                            | 0.00020591        | 0.000205907          | 0.275527           | -3.62941                     | T down vs N                            | 22.816  | 15.5638   | 10.9141    | 1         |
| cg08944026  | ANKRD33B                                                                                        | 2.91E-05          | 2.91E-05             | 0.310764           | -3.21787                     | T down vs N                            | 33.216  | 12.7933   | 6.1625     | 1         |
| cg08944029  | MCC;MCC                                                                                         | 0.00242357        | 0.00242357           | 0.308124           | -3.24545                     | T down vs N                            | 12.926  | 12.9808   | 16.0683    | 1         |
| cg08944443  | GPX5;GPX5                                                                                       | 0.0004013         | 0.000401296          | 0.259641           | -3.85148                     | T down vs N                            | 19.823  | 17.0308   | 13.7466    | 1         |
| cg08944940  | MACF1                                                                                           | 0.00077478        | 0.000774779          | 0.327014           | -3.05797                     | T down vs N                            | 17.112  | 11.7018   | 10.9417    | 1         |
| cg08946601  | NR2E1                                                                                           | 0.00020141        | 0.000201411          | 0.28063            | -3.56341                     | T down vs N                            | 22.92   | 15.1238   | 10.5577    | 1         |
| cg08946658  | DARS                                                                                            | 0.00622639        | 0.00622639           | 0.274132           | -3.64788                     | T down vs N                            | 9.9074  | 15.6866   | 25.333     | 1         |
| cg08946713  | STAT1;STAT1                                                                                     | 9.21E-05          | 9.21E-05             | 0.230512           | -4.33817                     | T down vs N                            | 26.78   | 20.1692   | 12.0506    | 1         |
| cg08948808  | SPRR4                                                                                           | 0.00021192        | 0.000211918          | 0.130173           | -7.68211                     | T down vs N                            | 22.682  | 38.9359   | 27.4657    | 1         |
| cg08949101  | TCP10L                                                                                          | 3.21E-05          | 3.21E-05             | 0.276395           | -3.61801                     | T down vs N                            | 32.624  | 15.4879   | 7.59594    | 1         |
| cg08949408  | C1QL3                                                                                           | 0.00013365        | 0.000133648          | 3.98245            | 3.98245                      | T up vs N                              | 24.896  | 17.886    | 11.4949    | 1         |
| cg08951164  | ATP11C;ATP11C                                                                                   | 1.34E-05          | 1.34E-05             | 0.327464           | -3.05377                     | T down vs N                            | 38.106  | 11.673    | 4.90131    | 1         |
| cg08957484  | CCNI2                                                                                           | 2.91E-05          | 2.91E-05             | 7.99176            | 7.99176                      | T up vs N                              | 33.217  | 40.4599   | 19.4891    | 1         |
| cg08959216  | TBX20;TBX20;TBX20;TBX20                                                                         | 0.00528658        | 0.00528658           | 4.3114             | 4.3114                       | T up vs N                              | 10.404  | 19.9995   | 30.757     | 1         |
| cg08962305  | LRRC2;TDGF1                                                                                     | 0.00080162        | 0.000801618          | 0.224367           | -4.45698                     | T down vs N                            | 16.977  | 20.9188   | 19.7146    | 1         |
| cg08963013  | LRRTM4                                                                                          | 0.00129718        | 0.00129718           | 0.226829           | -4.40861                     | T down vs N                            | 15.143  | 20.6145   | 13.6781    | 1         |
| cg08965143  | TP53I3;TP53I3                                                                                   | 0.00015548        | 0.000155475          | 0.286656           | -3.4885                      | T down vs N                            | 24.155  | 14.6223   | 9.68563    | 1         |
| cg08968107  | COL9A1                                                                                          | 6.74E-05          | 6.74E-05             | 0.314507           | -3.17958                     | T down vs N                            | 28.436  | 12.5325   | 7.05157    | 1         |
| cg08969377  | B3GNTL1                                                                                         | 0.00084797        | 0.000847972          | 0.229116           | -4.36461                     | T down vs N                            | 16.757  | 20.3366   | 19.4178    | 1         |
| cg08970655  | OR1L3                                                                                           | 9.15E-06          | 9.15E-06             | 0.194884           | -5.13124                     | T down vs N                            | 40.681  | 25.0485   | 9.8517     | 1         |
| cg08970694  | HBE1                                                                                            | 0.00030592        | 0.000305923          | 0.284128           | -3.51954                     | T down vs N                            | 21.009  | 14.8303   | 11.2942    | 1         |
| cg08970795  | MED17                                                                                           | 0.00114525        | 0.00114525           | 3.99079            | 3.99079                      | T up vs N                              | 33.71   | 7.47507   | 1.33049    | 1         |
| cg08972081  | RBP1;RBP1;RBP1                                                                                  | 0.00011779        | 0.000117789          | 0.192805           | -5.18658                     | T down vs N                            | 25.526  | 25.3782   | 15.9076    | 1         |
| cg08972756  | VAX2                                                                                            | 0.00022384        | 0.000223843          | 0.239146           | -4.18155                     | T down vs N                            | 22.428  | 19.1711   | 13.6768    | 1         |
| cg08974450  | ATP2C2;ATP2C2                                                                                   | 2.55E-05          | 2.55E-05             | 70.9733            | 70.9733                      | T up vs N                              | 34.004  | 170.157   | 80.0646    | 1         |
| cg08975164  | 3-Mar                                                                                           | 0.00021393        | 0.000213926          | 0.17357            | -5.76137                     | T down vs N                            | 22.638  | 28.7224   | 20.3004    | 1         |
| cg08975803  | KRT7                                                                                            | 2.15E-05          | 2.15E-05             | 9.74601            | 9.74601                      | T up vs N                              | 35.057  | 48.5549   | 22.1602    | 1         |
| cg08976025  | ACSM4                                                                                           | 0.00015772        | 0.000157721          | 0.306219           | -3.26564                     | T down vs N                            | 24.086  | 13.1179   | 8.71424    | 1         |
| cg08976995  | HLA-DQB2                                                                                        | 5.63E-05          | 5.63E-05             | 0.208778           | -4.78977                     | T down vs N                            | 29.415  | 22.9833   | 12.5016    | 1         |
| cg08978665  | IL32;IL32;IL32;IL32;IL32;IL32;IL32                                                              | 0.0006578         | 0.000657801          | 0.288532           | -3.46582                     | T down vs N                            | 18.318  | 13.6188   | 11.152     | 1         |
| cg08979319  | SIM1                                                                                            | 0.00016309        | 0.000163091          | 5.68518            | 5.68518                      | T up vs N                              | 23.924  | 28.2873   | 18.9184    | 1         |
| cg08986767  | SAMD9;SAMD9                                                                                     | 0.00638459        | 0.00638459           | 0.331347           | -3.01798                     | T down vs N                            | 9.8323  | 11.4278   | 18.5964    | 1         |
| cg08988323  | CLINT1                                                                                          | 5.09E-05          | 5.09E-05             | 0.259773           | -3.84952                     | T down vs N                            | 29.971  | 17.018    | 9.08503    | 1         |
| cg08988543  | ADH6;ADH6;ADH6;ADH6                                                                             | 0.00020775        | 0.000207751          | 0.215124           | -4.64849                     | T down vs N                            | 22.775  | 22.1132   | 15.5353    | 1         |
| cg08989942  | CD207                                                                                           | 0.00104915        | 0.00104915           | 0.31754            | -3.14921                     | T down vs N                            | 15.938  | 12.3255   | 12.3738    | 1         |
| cg08991742  | ARHGAP25;ARHGAP25;ARHGAP25;AR                                                                   | 7.27E-07          | 7.27E-07             | 0.051391           | -19.4586                     | T down vs N                            | 61.376  | 82.5227   | 21.5129    | 1         |
| cg08994060  | HGAP25;ARHGAP25;ARHGAP25                                                                        | 7.98E-05          | 7.98E-05             | 0.228682           | -4.37289                     | T down vs N                            | 27.532  | 20.3889   | 11.8491    | 1         |
| cg08998189  | GLYAT                                                                                           | 0.00077015        | 0.000770148          | 0.310944           | -3.21602                     | T down vs N                            | 17.135  | 12.7807   | 11.934     | 1         |
| cg08998192  | TAP2;TAP2                                                                                       | 0.00055363        | 0.000553625          | 0.241545           | -4.14001                     | T down vs N                            | 18.468  | 18.9045   | 16.3783    | 1         |
| cg08998593  | EXOC2                                                                                           | 0.00069549        | 0.000695487          | 4.58152            | 4.58152                      | T up vs N                              | 17.541  | 21.6975   | 19.7915    | 1         |
| cg09000385  | FOXO1                                                                                           | 0.0069174         | 0.0069174            | 0.287345           | -3.48014                     | T down vs N                            | 9.5939  | 14.5661   | 24.2923    | 1         |
| cg09001527  | COL23A1                                                                                         | 0.00040219        | 0.000402192          | 0.288542           | -3.4657                      | T down vs N                            | 19.813  | 14.4692   | 11.6845    | 1         |
| cg09002092  | CARD14                                                                                          | 1.79E-05          | 1.79E-05             | 0.25339            | -3.94649                     | T down vs N                            | 36.224  | 17.6519   | 7.79675    | 1         |
| cg09004581  | MTO1;MTO1;MTO1                                                                                  | 0.00085981        | 0.000859813          | 0.23276            | -4.29627                     | T down vs N                            | 16.703  | 19.9033   | 19.0657    | 1         |
| cg09009070  | AUTS2;AUTS2                                                                                     | 1.74E-05          | 1.74E-05             | 0.25648            | -3.89894                     | T down vs N                            | 36.386  | 17.3416   | 7.62569    | 1         |
| cg09009380  | PKP1;PKP1                                                                                       | 1.92E-05          | 1.92E-05             | 4.32084            | 4.32084                      | T up vs N                              | 35.767  | 20.0594   | 8.97344    | 1         |
| cg09010499  | BDKRB2                                                                                          | 0.00216462        | 0.00216462           | 0.31864            | -3.13834                     | T down vs N                            | 13.313  | 12.2513   | 14.7239    | 1         |
| cg09013032  | HSD17B13;HSD17B13                                                                               | 6.63E-05          | 6.63E-05             | 0.214365           | -4.66494                     | T down vs N                            | 28.52   | 22.2149   | 12.4628    | 1         |
| cg09015246  | CIITA;CIITA                                                                                     | 0.0013957         | 0.0013957            | 0.326383           | -3.06389                     | T down vs N                            | 15.279  | 11.0516   | 10.8495    | 1         |
| cg09016806  | TRIM10;TRIM10                                                                                   | 0.00073632        | 0.000736322          | 0.307219           | -3.25501                     | T down vs N                            | 17.313  | 13.0457   | 12.0562    | 1         |
| cg09025501  | CYBA                                                                                            | 8.51E-06          | 8.51E-06             | 16.6907            | 16.6907                      | T up vs N                              | 41.192  | 74.2116   | 28.8259    | 1         |
| cg09027601  | FAM171A1                                                                                        | 0.00078412        | 0.000784123          | 4.16104            | 4.16104                      | T up vs N                              | 17.064  | 19.0396   | 17.8523    | 1         |
| cg09028204  | KCNS1                                                                                           | 3.59E-05          | 3.59E-05             | 10.7434            | 10.7434                      | T up vs N                              | 31.969  | 52.7993   | 26.4251    | 1         |
| cg09028935  | TGM6                                                                                            | 0.00235359        | 0.00235359           | 0.28342            | -3.52833                     | T down vs N                            | 13.026  | 14.8892   | 18.2893    | 1         |
| cg09029902  | ZNF217;ZNF217                                                                                   | 0.00051825        | 0.000518246          | 0.270963           | -3.69054                     | T down vs N                            | 18.741  | 15.9697   | 13.6338    | 1         |
| cg09032630  | HIST1H2AL                                                                                       | 1.82E-05          | 1.82E-05             | 5.24042            | 5.24042                      | T up vs N                              | 36.119  | 25.6976   | 11.3834    | 1         |
| cg09033997  | CCR9;CCR9                                                                                       | 4.30E-06          | 4.30E-06             | 0.26615            | -3.75728                     | T down vs N                            | 46.179  | 16.4111   | 5.68604    | 1         |
| cg09035307  | DNAJC2;DNAJC2                                                                                   | 0.00010445        | 0.000104446          | 0.283548           | -3.52674                     | T down vs N                            | 26.134  | 14.8786   | 9.109      | 1         |

| Probeset ID                                                                     | UCSC_REFGENE_NAME                  | p-value<br>(Type) | p-value (T vs.<br>N) | Ratio (T<br>vs. N) | Fold-<br>Change (T<br>vs. N) | Fold-Change (T vs.<br>N) (Description) | F(Type) | SS (Type) | SS (Error) | F (Error) |
|---------------------------------------------------------------------------------|------------------------------------|-------------------|----------------------|--------------------|------------------------------|----------------------------------------|---------|-----------|------------|-----------|
| cg09035882                                                                      | ZFP64                              | 0.0033403         | 0.0033403            | 3.96398            | 3.96398                      | T up vs N                              | 11.857  | 17.7658   | 23.9745    | 1         |
| cg09037777                                                                      | PKLR;PKLR                          | 0.00045216        | 0.000452161          | 3.31958            | 3.31958                      | T up vs N                              | 19.314  | 13.4837   | 11.1702    | 1         |
| cg09040034                                                                      | KIFC1                              | 6.04E-05          | 6.04E-05             | 0.17254            | -5.79577                     | T down vs N                            | 29.026  | 28.918    | 15.9405    | 1         |
| cg09041678                                                                      | PAX6                               | 0.00028637        | 0.000286366          | 3.44393            | 3.44393                      | T up vs N                              | 21.305  | 14.3228   | 10.7566    | 1         |
| cg09043403                                                                      | AGPAT4                             | 8.67E-05          | 8.67E-05             | 3.18404            | 3.18404                      | T up vs N                              | 27.096  | 12.563    | 7.41829    | 1         |
| cg09046055                                                                      | PRR18                              | 1.52E-05          | 1.52E-05             | 7.70688            | 7.70688                      | T up vs N                              | 37.25   | 39.059    | 16.7771    | 1         |
| cg09050670                                                                      | CLCN7;CLCN7                        | 0.00024031        | 0.000240305          | 0.18318            | -5.45912                     | T down vs N                            | 22.1    | 26.9819   | 19.5341    | 1         |
| cg09053611                                                                      | NDUFA5                             | 2.67E-05          | 2.67E-05             | 0.21563            | -4.63758                     | T down vs N                            | 33.732  | 22.0456   | 10.4569    | 1         |
| cg09053907                                                                      | BTC                                | 0.00025904        | 0.000259042          | 0.320525           | -3.11988                     | T down vs N                            | 21.758  | 12.1252   | 8.91662    | 1         |
| cg09055205                                                                      | SCARA5                             | 0.0002115         | 0.000211496          | 0.281922           | -3.54708                     | T down vs N                            | 22.691  | 15.0146   | 10.5871    | 1         |
| cg09055992                                                                      | DLGAP2                             | 0.0009088         | 0.000908802          | 0.236717           | -4.22446                     | T down vs N                            | 16.488  | 19.4457   | 18.8704    | 1         |
| cg09057080                                                                      | RPUSD1;CHTF18                      | 6.43E-06          | 6.43E-06             | 0.282445           | -3.54051                     | T down vs N                            | 43.183  | 14.9707   | 5.54686    | 1         |
| cg09058554                                                                      | SLC25A33                           | 0.00014386        | 0.000143857          | 0.290197           | -3.44593                     | T down vs N                            | 24.534  | 14.3363   | 9.34968    | 1         |
| cg09058747                                                                      | KIFC1                              | 0.00014823        | 0.000148227          | 0.253022           | -3.95223                     | T down vs N                            | 24.387  | 17.6894   | 11.6056    | 1         |
| cg09059945                                                                      | MEST                               | 5.98E-06          | 5.98E-06             | 22.8497            | 22.8497                      | T up vs N                              | 43.715  | 91.697    | 33.5622    | 1         |
| cg09064148                                                                      | FCER1A                             | 0.0003078         | 0.000307803          | 0.285194           | -3.50638                     | T down vs N                            | 20.982  | 14.7422   | 11.2417    | 1         |
| cg09065413                                                                      | PTCH2                              | 4.76E-05          | 4.76E-05             | 10.5633            | 10.5633                      | T up vs N                              | 30.346  | 52.0502   | 27.4434    | 1         |
| PCDHGA4;PCDHGA6;PCDHGA1;PCDHGA5;PCDHGB1;PCDHGA6;PCDHGA3;PCDHGA2;PCDHGB2;PCDHGB3 |                                    |                   |                      |                    |                              |                                        |         |           |            |           |
| cg09066326                                                                      | DHGA2;PCDHGB2;PCDHGB3              | 0.00029878        | 0.000298784          | 6.76171            | 6.76171                      | T up vs N                              | 21.115  | 34.2144   | 25.9266    | 1         |
| cg09066883                                                                      | PTPRN2;PTPRN2;PTPRN2               | 3.32E-05          | 3.32E-05             | 0.166177           | -6.01767                     | T down vs N                            | 32.423  | 30.1679   | 14.8873    | 1         |
| cg09067465                                                                      | HERPUD1;HERPUD1;HERPUD1            | 1.43E-07          | 1.43E-07             | 0.22511            | -4.44226                     | T down vs N                            | 85.076  | 19.6012   | 3.45597    | 1         |
| cg09067559                                                                      | MLPH;MLPH                          | 0.00018421        | 0.000184207          | 0.209396           | -4.77564                     | T down vs N                            | 23.341  | 22.8967   | 15.6953    | 1         |
| cg09070885                                                                      | TEAD1                              | 4.12E-05          | 4.12E-05             | 0.259778           | -3.84943                     | T down vs N                            | 31.172  | 17.0174   | 8.73482    | 1         |
| cg09071093                                                                      | GLI1;GLI1;GLI1                     | 6.81E-05          | 6.81E-05             | 0.195118           | -5.12512                     | T down vs N                            | 28.374  | 25.0119   | 14.104     | 1         |
| cg09072148                                                                      | NRXN2;NRXN2                        | 0.00561514        | 0.00561514           | 0.321435           | -3.11105                     | T down vs N                            | 10.22   | 12.0649   | 18.889     | 1         |
| cg09074856                                                                      | FLJ42875                           | 0.00046523        | 0.00046523           | 3.10006            | 3.10006                      | T up vs N                              | 19.193  | 11.9897   | 9.99495    | 1         |
| cg09076788                                                                      | ITPR1L2;ITPR1L2                    | 0.00500007        | 0.00500007           | 0.268197           | -3.7286                      | T down vs N                            | 10.575  | 16.2217   | 24.5425    | 1         |
| cg09079168                                                                      | ZNF679                             | 0.00047209        | 0.000472091          | 0.267953           | -3.732                       | T down vs N                            | 19.132  | 16.2441   | 13.5851    | 1         |
| cg09087961                                                                      | IGF2BP3                            | 9.28E-05          | 9.28E-05             | 0.285228           | -3.50596                     | T down vs N                            | 26.745  | 14.7394   | 8.81779    | 1         |
| cg09090582                                                                      | CNPY1                              | 0.00034256        | 0.000342555          | 0.214334           | -4.66561                     | T down vs N                            | 20.51   | 22.2191   | 17.3335    | 1         |
| cg09092054                                                                      | CLDN5;CLDN5                        | 3.26E-05          | 3.26E-05             | 20.6916            | 20.6916                      | T up vs N                              | 32.528  | 85.9744   | 42.289     | 1         |
| cg09092344                                                                      | SRFBP1                             | 1.58E-05          | 1.58E-05             | 0.259246           | -3.85734                     | T down vs N                            | 37.026  | 17.0693   | 7.37612    | 1         |
| cg09093210                                                                      | NXP4                               | 0.00087028        | 0.000870275          | 4.02418            | 4.02418                      | T up vs N                              | 16.656  | 18.1569   | 17.4419    | 1         |
| cg09093212                                                                      | LOC100133893                       | 0.00303871        | 0.00303871           | 0.325857           | -3.06883                     | T down vs N                            | 12.167  | 11.7761   | 15.4858    | 1         |
| cg09095645                                                                      | SERHL                              | 2.55E-06          | 2.55E-06             | 0.176733           | -5.65824                     | T down vs N                            | 50.308  | 28.1329   | 8.94743    | 1         |
| cg09096383                                                                      | CSN1S1;CSN1S1                      | 0.00043723        | 0.000437232          | 0.165865           | -6.02901                     | T down vs N                            | 19.456  | 30.2312   | 24.8611    | 1         |
| cg09098025                                                                      | CHMP7                              | 3.62E-05          | 3.62E-05             | 0.329351           | -3.03628                     | T down vs N                            | 31.913  | 11.5532   | 5.79228    | 1         |
| cg09099637                                                                      | COL4A5;COL4A5;COL4A5               | 1.77E-06          | 1.77E-06             | 0.23556            | -4.24521                     | T down vs N                            | 53.337  | 19.5782   | 5.87302    | 1         |
| cg09100593                                                                      | SMC4;SMC4;MIR16-2                  | 1.06E-05          | 1.06E-05             | 0.176422           | -5.66824                     | T down vs N                            | 39.677  | 28.1903   | 11.368     | 1         |
| cg09107594                                                                      | OR6F1                              | 0.00045422        | 0.000454223          | 0.167127           | -5.98347                     | T down vs N                            | 19.294  | 29.9766   | 24.8583    | 1         |
| ABCC1;ABCC1;ABCC1;ABCC1;ABCC1                                                   |                                    |                   |                      |                    |                              |                                        |         |           |            |           |
| cg09109383                                                                      | ABCC1;ABCC1;ABCC1;ABCC1;ABCC1      | 0.00014379        | 0.000143789          | 0.299762           | -3.33598                     | T down vs N                            | 24.536  | 13.5946   | 8.86514    | 1         |
| cg09109411                                                                      | PDE6A                              | 8.66E-05          | 8.66E-05             | 0.268832           | -3.7198                      | T down vs N                            | 27.102  | 16.1635   | 9.54245    | 1         |
| cg09122414                                                                      | INPP5B                             | 1.84E-06          | 1.84E-06             | 0.127306           | -7.85509                     | T down vs N                            | 53.008  | 39.7911   | 12.0107    | 1         |
| cg09125320                                                                      | KLHL20                             | 0.00019923        | 0.000199228          | 0.269805           | -3.70638                     | T down vs N                            | 22.971  | 16.0746   | 11.1965    | 1         |
| cg09127170                                                                      | ARHGEF10L                          | 0.00517727        | 0.00517727           | 0.219676           | -4.55217                     | T down vs N                            | 10.468  | 21.5146   | 32.8842    | 1         |
| cg09131332                                                                      | TTL8                               | 2.93E-05          | 2.93E-05             | 0.321141           | -3.1139                      | T down vs N                            | 33.167  | 12.0843   | 5.82961    | 1         |
| cg09133032                                                                      | DRD4                               | 0.00448938        | 0.00448938           | 3.7282             | 3.7282                       | T up vs N                              | 10.911  | 16.219    | 23.7841    | 1         |
| cg09134726                                                                      | PRTN3                              | 1.06E-05          | 1.06E-05             | 0.228957           | -4.36764                     | T down vs N                            | 39.641  | 20.3558   | 8.21616    | 1         |
| cg09135320                                                                      | OR6N1                              | 1.74E-06          | 1.74E-06             | 0.131157           | -7.62447                     | T down vs N                            | 53.501  | 38.6488   | 11.5584    | 1         |
| cg09136052                                                                      | DYNC1I1;DYNC1I1;DYNC1I1            | 0.00108302        | 0.00108302           | 0.163617           | -6.11183                     | T down vs N                            | 15.817  | 30.6921   | 31.0471    | 1         |
| cg09137696                                                                      | MT1A                               | 3.64E-06          | 3.64E-06             | 24.9181            | 24.9181                      | T up vs N                              | 47.471  | 96.8466   | 32.6422    | 1         |
| cg09138133                                                                      | INHBA;LOC285954;LOC285954          | 2.13E-05          | 2.13E-05             | 0.316778           | -3.15679                     | T down vs N                            | 35.119  | 12.3772   | 5.63893    | 1         |
| cg09140114                                                                      | RUND2C                             | 0.00011193        | 0.000111926          | 4.91116            | 4.91116                      | T up vs N                              | 25.783  | 23.7236   | 14.722     | 1         |
| cg09140665                                                                      | OR10A3                             | 5.00E-06          | 5.00E-06             | 0.238139           | -4.19922                     | T down vs N                            | 45.039  | 19.2843   | 6.85079    | 1         |
| cg09141303                                                                      | NHEDC2                             | 0.00159283        | 0.00159283           | 0.234303           | -4.26797                     | T down vs N                            | 14.394  | 19.7233   | 21.9234    | 1         |
| CRYZ;CRYZ;TYW3;CRYZ;TYW3;CRYZ;TYW3                                              |                                    |                   |                      |                    |                              |                                        |         |           |            |           |
| cg09142399                                                                      | CRYZ;CRYZ;TYW3;CRYZ;TYW3;CRYZ;TYW3 | 1.12E-05          | 1.12E-05             | 0.293091           | -3.41191                     | T down vs N                            | 39.3    | 14.1073   | 5.74346    | 1         |
| cg09143713                                                                      | PLCB4;PLCB4                        | 0.00039897        | 0.000398969          | 0.243678           | -4.10378                     | T down vs N                            | 19.848  | 18.6713   | 15.0517    | 1         |
| cg09144964                                                                      | HOXA3;HOXA3;HOXA3                  | 0.00166264        | 0.00166264           | 3.03448            | 3.03448                      | T up vs N                              | 14.241  | 11.5409   | 12.9669    | 1         |
| cg09145322                                                                      | UNC93B1                            | 9.86E-06          | 9.86E-06             | 0.30366            | -3.29316                     | T down vs N                            | 40.167  | 13.3046   | 5.29978    | 1         |
| cg09146781                                                                      | TRIM72                             | 0.00096626        | 0.000966256          | 0.255534           | -3.91338                     | T down vs N                            | 16.252  | 17.436    | 17.166     | 1         |
| cg09149672                                                                      | CD1C                               | 2.58E-07          | 2.58E-07             | 0.063195           | -15.8242                     | T down vs N                            | 71.933  | 71.4272   | 15.8874    | 1         |
| cg09149894                                                                      | ATF6B;ATF6B;FKBPL                  | 0.00093241        | 0.000932409          | 0.295417           | -3.38505                     | T down vs N                            | 16.389  | 13.9262   | 13.5958    | 1         |
| cg09150559                                                                      | PCDHB10                            | 0.00124426        | 0.00124426           | 0.262423           | -3.81064                     | T down vs N                            | 15.297  | 16.7626   | 17.5331    | 1         |
| cg09154826                                                                      | DDX59                              | 0.00289114        | 0.00289114           | 0.331736           | -3.01444                     | T down vs N                            | 12.332  | 11.4035   | 14.7952    | 1         |
| cg09156097                                                                      | LOC389333                          | 1.89E-05          | 1.89E-05             | 7.76466            | 7.76466                      | T up vs N                              | 35.866  | 39.3452   | 17.5522    | 1         |
| cg09157813                                                                      | CASP12                             | 5.40E-05          | 5.40E-05             | 0.263616           | -3.7934                      | T down vs N                            | 29.646  | 16.6492   | 8.9855     | 1         |
| TNFSF13B;TNFSF13B;TNFSF13B;TNFSF13B                                             |                                    |                   |                      |                    |                              |                                        |         |           |            |           |
| cg09158314                                                                      | 13B                                | 0.00176364        | 0.00176364           | 0.298209           | -3.35336                     | T down vs N                            | 14.03   | 13.7121   | 15.6371    | 1         |

| Probeset ID | UCSC_REFGENE_NAME                               | p-value<br>(Type) | p-value (T vs.<br>N) | Ratio (T<br>vs. N) | Fold-<br>Change (T<br>vs. N) | Fold-Change (T vs.<br>N) (Description) | F(Type) | SS (Type) | SS (Error) | F (Error) |
|-------------|-------------------------------------------------|-------------------|----------------------|--------------------|------------------------------|----------------------------------------|---------|-----------|------------|-----------|
| cg09159050  | MIB2;MIB2;MIB2;MIB2;MIB2                        | 0.00073408        | 0.000734075          | 0.23436            | -4.26695                     | T down vs N                            | 17.325  | 19.7168   | 18.2085    | 1         |
| cg09159452  | IQCE;IQCE                                       | 0.00027738        | 0.000277379          | 0.106798           | -9.36346                     | T down vs N                            | 21.448  | 46.8621   | 34.9587    | 1         |
| cg09161412  | MYO15A                                          | 0.00163026        | 0.00163026           | 12.1742            | 12.1742                      | T up vs N                              | 14.69   | 55.0651   | 56.2262    | 1         |
| cg09163005  | H2AFJ;H2AFJ                                     | 0.00052077        | 0.000520767          | 4.07942            | 4.07942                      | T up vs N                              | 18.721  | 18.5141   | 15.8231    | 1         |
| cg09165033  | VHLL;VHLL                                       | 0.00160108        | 0.00160108           | 0.292652           | -3.41702                     | T down vs N                            | 14.376  | 14.1417   | 15.7396    | 1         |
| cg09166410  | C13orf16                                        | 3.25E-05          | 3.25E-05             | 0.196951           | -5.07739                     | T down vs N                            | 32.557  | 24.7264   | 12.1519    | 1         |
| cg09167911  | ZYG11A                                          | 2.07E-05          | 2.07E-05             | 0.261391           | -3.82568                     | T down vs N                            | 35.3    | 16.8615   | 7.64259    | 1         |
| cg09169255  | SPR                                             | 0.00162987        | 0.00162987           | 0.215692           | -4.63624                     | T down vs N                            | 14.691  | 20.7409   | 21.177     | 1         |
| cg09169531  | SPRR2A                                          | 9.64E-05          | 9.64E-05             | 0.189744           | -5.27025                     | T down vs N                            | 26.544  | 25.8741   | 15.596     | 1         |
| cg09169633  | MAN2A2                                          | 0.00026209        | 0.000262093          | 3.06394            | 3.06394                      | T up vs N                              | 21.704  | 11.7426   | 8.65645    | 1         |
| cg09169682  | SFRS8                                           | 2.13E-05          | 2.13E-05             | 0.196721           | -5.08335                     | T down vs N                            | 35.11   | 24.7621   | 11.2842    | 1         |
| cg09169734  | TMEM150B                                        | 3.66E-05          | 3.66E-05             | 0.324078           | -3.08568                     | T down vs N                            | 31.851  | 11.8914   | 5.97349    | 1         |
| cg09173378  | KCNT2                                           | 0.00074762        | 0.000747623          | 0.326952           | -3.05855                     | T down vs N                            | 17.253  | 11.7058   | 10.8559    | 1         |
| cg09174123  | SBN02                                           | 9.27E-05          | 9.27E-05             | 0.260408           | -3.84012                     | T down vs N                            | 26.745  | 16.9563   | 10.144     | 1         |
| cg09174411  | BTBD11                                          | 5.58E-05          | 5.58E-05             | 0.306663           | -3.26091                     | T down vs N                            | 30.784  | 12.3161   | 6.0012     | 1         |
| cg09174555  | S100A8                                          | 8.39E-06          | 8.39E-06             | 0.187321           | -5.33842                     | T down vs N                            | 41.29   | 26.2757   | 10.1818    | 1         |
| cg09176275  | C1orf87                                         | 3.60E-05          | 3.60E-05             | 6.97324            | 6.97324                      | T up vs N                              | 31.953  | 35.3261   | 17.689     | 1         |
| cg09177080  | UNC13D                                          | 1.24E-05          | 1.24E-05             | 0.295831           | -3.38031                     | T down vs N                            | 38.604  | 13.8942   | 5.75859    | 1         |
| cg09178190  | PCDHB6                                          | 0.00065365        | 0.000653651          | 4.87137            | 4.87137                      | T up vs N                              | 17.79   | 23.4817   | 21.1187    | 1         |
| cg09179211  | FAM3B;FAM3B                                     | 0.00038593        | 0.000385926          | 15.9089            | 15.9089                      | T up vs N                              | 19.991  | 71.7039   | 57.3892    | 1         |
| cg09181559  | OVOL1                                           | 0.00227688        | 0.00227688           | 0.251392           | -3.97784                     | T down vs N                            | 13.139  | 17.8561   | 21.7442    | 1         |
| cg09181792  | CFTR                                            | 1.48E-05          | 1.48E-05             | 6.2212             | 6.2212                       | T up vs N                              | 37.442  | 31.2966   | 13.3739    | 1         |
| cg09183450  | AHNAK;AHNAK<br>PLEKHB1;PLEKHB1;PLEKHB1;PLEKHB1; | 0.00015933        | 0.000159333          | 0.176159           | -5.6767                      | T down vs N                            | 24.036  | 28.2388   | 18.7974    | 1         |
| cg09185399  | PLEKHB1                                         | 0.00013174        | 0.000131735          | 5.77648            | 5.77648                      | T up vs N                              | 24.967  | 28.8084   | 18.4615    | 1         |
| cg09185884  | KCTD2                                           | 0.00153144        | 0.00153144           | 3.11258            | 3.11258                      | T up vs N                              | 14.536  | 12.0754   | 13.2915    | 1         |
| cg09189601  | UGT2B15                                         | 0.00145288        | 0.00145288           | 0.218855           | -4.56924                     | T down vs N                            | 14.727  | 21.621    | 23.4899    | 1         |
| cg09191232  | PAPSS1                                          | 0.0015654         | 0.0015654            | 4.02306            | 4.02306                      | T up vs N                              | 14.457  | 18.1496   | 20.0869    | 1         |
| cg09192940  | RGS11;RGS11                                     | 0.0070399         | 0.0070399            | 0.146969           | -6.80416                     | T down vs N                            | 9.5421  | 34.4388   | 57.7465    | 1         |
| cg09196942  | PRAMEF1;PRAMEF1                                 | 2.74E-05          | 2.74E-05             | 0.318484           | -3.13988                     | T down vs N                            | 33.578  | 12.2618   | 5.84281    | 1         |
| cg09196959  | TRIM40                                          | 0.00156489        | 0.00156489           | 0.243043           | -4.11451                     | T down vs N                            | 14.458  | 18.7404   | 20.7391    | 1         |
| cg09199014  | JAKMIP1                                         | 0.00674624        | 0.00674624           | 0.274835           | -3.63855                     | T down vs N                            | 9.6681  | 15.6245   | 25.8573    | 1         |
| cg09199250  | TH;TH;TH                                        | 0.00021743        | 0.000217427          | 0.216651           | -4.61571                     | T down vs N                            | 22.562  | 21.91     | 15.5373    | 1         |
| cg09199330  | CYP27C1                                         | 0.0011444         | 0.0011444            | 0.194171           | -5.1501                      | T down vs N                            | 15.609  | 25.161    | 25.7908    | 1         |
| cg09201525  | RHBDf1                                          | 0.00203508        | 0.00203508           | 4.78532            | 4.78532                      | T up vs N                              | 13.527  | 22.956    | 27.1526    | 1         |
| cg09201719  | CYP17A1                                         | 0.00229025        | 0.00229025           | 0.332974           | -3.00324                     | T down vs N                            | 13.119  | 11.3267   | 13.8142    | 1         |
| cg09205751  | NLRP6                                           | 1.09E-05          | 1.09E-05             | 0.287328           | -3.48034                     | T down vs N                            | 39.503  | 14.5675   | 5.90029    | 1         |
| cg09207718  | CYP1A2                                          | 0.00153239        | 0.00153239           | 0.215861           | -4.6326                      | T down vs N                            | 14.534  | 22.0147   | 24.2356    | 1         |
| cg09208010  | MMP14                                           | 0.00022819        | 0.000228189          | 0.263215           | -3.79917                     | T down vs N                            | 22.339  | 16.6872   | 11.9522    | 1         |
| cg09212118  | GUCA2A                                          | 5.30E-05          | 5.30E-05             | 0.302702           | -3.30358                     | T down vs N                            | 29.749  | 13.3753   | 7.19365    | 1         |
| cg09214551  | NMT1;DCAKD                                      | 0.00040166        | 0.000401659          | 0.306302           | -3.26476                     | T down vs N                            | 19.819  | 13.1119   | 10.5855    | 1         |
| cg09217215  | PAX6;PAX6;PAX6                                  | 0.00231506        | 0.00231506           | 0.15533            | -6.43792                     | T down vs N                            | 13.082  | 32.4801   | 39.7249    | 1         |
| cg09219688  | ECHDC3                                          | 0.00557269        | 0.00557269           | 0.287067           | -3.48351                     | T down vs N                            | 10.453  | 13.7306   | 19.7032    | 1         |
| cg09219877  | DNASE1L2                                        | 3.69E-06          | 3.69E-06             | 6.32847            | 6.32847                      | T up vs N                              | 47.35   | 31.8847   | 10.7742    | 1         |
| cg09220235  | KISS1                                           | 4.72E-05          | 4.72E-05             | 0.239983           | -4.16697                     | T down vs N                            | 30.393  | 19.0776   | 10.043     | 1         |
| cg09220326  | CDCP1;CDCP1                                     | 2.55E-08          | 2.55E-08             | 0.106802           | -9.36315                     | T down vs N                            | 101.07  | 46.8607   | 7.41812    | 1         |
| cg09221478  | KRT13;KRT13;KRT13;KRT13                         | 8.40E-05          | 8.40E-05             | 0.249827           | -4.00276                     | T down vs N                            | 27.262  | 18.0179   | 10.5748    | 1         |
| cg09225230  | EDARADD;EDARADD                                 | 0.00671496        | 0.00671496           | 0.328587           | -3.04333                     | T down vs N                            | 9.6819  | 11.6015   | 19.1723    | 1         |
| cg09225449  | LOC389333                                       | 0.000103          | 0.000102999          | 12.2502            | 12.2502                      | T up vs N                              | 26.206  | 58.7983   | 35.8997    | 1         |
| cg09225840  | TNFRSF1B                                        | 0.00013126        | 0.000131261          | 0.231715           | -4.31564                     | T down vs N                            | 24.985  | 20.0264   | 12.8245    | 1         |
| cg09228194  | SYNGAP1                                         | 0.00069559        | 0.000695587          | 0.315513           | -3.16944                     | T down vs N                            | 17.54   | 12.4635   | 11.369     | 1         |
| cg09228833  | ZNF217                                          | 0.00013142        | 0.00013142           | 0.210386           | -4.75316                     | T down vs N                            | 24.979  | 22.7587   | 14.5777    | 1         |
| cg09229061  | ZG16                                            | 9.92E-05          | 9.92E-05             | 0.251879           | -3.97016                     | T down vs N                            | 26.396  | 17.8061   | 10.7931    | 1         |
| cg09229246  | PIK3CD                                          | 5.67E-05          | 5.67E-05             | 0.295453           | -3.38464                     | T down vs N                            | 29.371  | 13.9234   | 7.5849     | 1         |
| cg09231418  | ZBTB32                                          | 8.87E-05          | 8.87E-05             | 0.222732           | -4.48971                     | T down vs N                            | 26.979  | 21.1241   | 12.5277    | 1         |
| cg09232269  | CR1L                                            | 0.00046617        | 0.000466172          | 0.325795           | -3.06941                     | T down vs N                            | 19.185  | 11.7801   | 9.82455    | 1         |
| cg09232851  | UBQLNL                                          | 1.18E-05          | 1.18E-05             | 0.180932           | -5.52695                     | T down vs N                            | 38.943  | 27.3759   | 11.2476    | 1         |
| cg09233395  | TRPS1                                           | 0.00117391        | 0.00117391           | 0.277881           | -3.59867                     | T down vs N                            | 15.514  | 15.359    | 15.8403    | 1         |
| cg09234973  | PAX8;PAX8;PAX8;PAX8;LOC440839;PAX8              | 3.75E-05          | 3.75E-05             | 0.136585           | -7.32143                     | T down vs N                            | 31.712  | 37.121    | 18.7288    | 1         |
| cg09235031  | TRPM1                                           | 1.39E-05          | 1.39E-05             | 0.312142           | -3.20367                     | T down vs N                            | 37.842  | 12.6966   | 5.3683     | 1         |
| cg09235702  | VN1R4                                           | 9.62E-06          | 9.62E-06             | 0.142265           | -7.02914                     | T down vs N                            | 40.336  | 35.6172   | 14.128     | 1         |
| cg09236434  | C2orf55                                         | 3.11E-05          | 3.11E-05             | 34.2809            | 34.2809                      | T up vs N                              | 32.817  | 117.014   | 57.0513    | 1         |
| cg09237133  | SECTM1                                          | 0.0050786         | 0.0050786            | 0.165182           | -6.05395                     | T down vs N                            | 10.527  | 30.3703   | 46.1586    | 1         |
| cg09237454  | MLL3                                            | 2.63E-06          | 2.63E-06             | 4.09426            | 4.09426                      | T up vs N                              | 50.034  | 18.61     | 5.95117    | 1         |
| cg09237846  | CHST11                                          | 0.00243347        | 0.00243347           | 0.314166           | -3.18303                     | T down vs N                            | 12.912  | 12.5561   | 15.5593    | 1         |
| cg09238677  | C3AR1;C3AR1                                     | 5.78E-07          | 5.78E-07             | 0.109378           | -9.14262                     | T down vs N                            | 63.588  | 45.8673   | 11.5411    | 1         |
| cg09239106  | KCNH3                                           | 7.70E-06          | 7.70E-06             | 4.54168            | 4.54168                      | T up vs N                              | 41.893  | 21.4491   | 8.19195    | 1         |
| cg09240001  | FKSG83                                          | 4.52E-05          | 4.52E-05             | 0.149861           | -6.67286                     | T down vs N                            | 30.638  | 33.7424   | 17.6215    | 1         |
| cg09240267  | MAPRE1                                          | 0.00036289        | 0.000362887          | 0.308231           | -3.24432                     | T down vs N                            | 20.258  | 12.9731   | 10.2464    | 1         |
| cg09243122  | ZNF98                                           | 0.00017521        | 0.000175206          | 0.268824           | -3.71991                     | T down vs N                            | 23.58   | 16.1641   | 10.9681    | 1         |
| cg09244436  | STARD3NL                                        | 0.00692303        | 0.00692303           | 0.307952           | -3.24726                     | T down vs N                            | 9.5915  | 12.9931   | 21.6744    | 1         |

| Probeset ID | UCSC_REFGENE_NAME                                           | p-value<br>(Type) | p-value (T vs.<br>N) | Ratio (T<br>vs. N) | Fold-<br>Change (T<br>vs. N) | Fold-Change (T vs.<br>N) (Description) | F(Type) | SS (Type) | SS (Error) | F (Error) |
|-------------|-------------------------------------------------------------|-------------------|----------------------|--------------------|------------------------------|----------------------------------------|---------|-----------|------------|-----------|
| cg09245192  | OTOP2                                                       | 0.00186647        | 0.00186647           | 0.32086            | -3.11662                     | T down vs N                            | 13.83   | 12.1029   | 14.0019    | 1         |
| cg09245698  | SYTL3                                                       | 6.99E-05          | 6.99E-05             | 0.281478           | -3.55267                     | T down vs N                            | 28.236  | 15.052    | 8.52933    | 1         |
| cg09246203  | TIGIT                                                       | 0.00057435        | 0.000574353          | 0.193559           | -5.16637                     | T down vs N                            | 18.317  | 25.258    | 22.0634    | 1         |
| cg09247695  | PTPRN2;PTPRN2;PTPRN2                                        | 0.00010425        | 0.000104254          | 0.331787           | -3.01398                     | T down vs N                            | 26.144  | 11.4004   | 6.97706    | 1         |
| cg09248380  | ENPEP                                                       | 8.11E-05          | 8.11E-05             | 0.267278           | -3.74143                     | T down vs N                            | 27.447  | 16.3064   | 9.50578    | 1         |
| cg09249611  | SUPT16H                                                     | 2.31E-05          | 2.31E-05             | 0.264077           | -3.78677                     | T down vs N                            | 34.629  | 16.6055   | 7.67249    | 1         |
| cg09250933  | PAX8;PAX8;PAX8;PAX8;LOC440839                               | 1.34E-05          | 1.34E-05             | 7.43206            | 7.43206                      | T up vs N                              | 38.094  | 37.6823   | 15.8273    | 1         |
| cg09250965  | HS3ST4                                                      | 3.13E-05          | 3.13E-05             | 0.111787           | -8.94555                     | T down vs N                            | 32.773  | 44.9685   | 21.954     | 1         |
| cg09252331  | FHAD1                                                       | 0.00140533        | 0.00140533           | 0.268322           | -3.72687                     | T down vs N                            | 14.848  | 16.2102   | 17.4674    | 1         |
| cg09256683  | CCL14;CCL14;CCL14-CCL15;CCL15                               | 5.60E-06          | 5.60E-06             | 0.245993           | -4.06516                     | T down vs N                            | 44.201  | 18.4221   | 6.66846    | 1         |
| cg09260072  | SLC44A3;SLC44A3;SLC44A3                                     | 0.00178295        | 0.00178295           | 3.54225            | 3.54225                      | T up vs N                              | 14.356  | 14.101    | 14.7332    | 1         |
| cg09262442  | C10orf18                                                    | 0.00013177        | 0.000131765          | 0.195837           | -5.1063                      | T down vs N                            | 24.966  | 24.8994   | 15.9572    | 1         |
| cg09265563  | FZD9                                                        | 0.00357258        | 0.00357258           | 0.313447           | -3.19033                     | T down vs N                            | 11.638  | 12.6058   | 17.3303    | 1         |
| cg09267427  | NCOR2;NCOR2                                                 | 6.92E-06          | 6.92E-06             | 6.45356            | 6.45356                      | T up vs N                              | 42.658  | 32.5648   | 12.2144    | 1         |
| cg09268718  | SCARF1;SCARF1;SCARF1;SCARF1;SCARF1                          | 0.00017601        | 0.000176011          | 4.07862            | 4.07862                      | T up vs N                              | 23.558  | 18.509    | 12.5709    | 1         |
| cg09270434  | UCHL1                                                       | 0.00017866        | 0.000178657          | 0.278357           | -3.5925                      | T down vs N                            | 23.487  | 15.3179   | 10.4351    | 1         |
| cg09272225  | NPAS2                                                       | 0.00026183        | 0.000261829          | 0.293341           | -3.409                       | T down vs N                            | 21.709  | 14.0876   | 10.383     | 1         |
| cg09272256  | AKR1C4                                                      | 1.99E-06          | 1.99E-06             | 0.175407           | -5.70102                     | T down vs N                            | 52.349  | 28.378    | 8.67349    | 1         |
| cg09274091  | LTB4R;LTB4R;CIDEB                                           | 0.00027172        | 0.000271724          | 0.288705           | -3.46374                     | T down vs N                            | 21.541  | 14.456    | 10.7375    | 1         |
| cg09276531  | TBCB                                                        | 0.00193294        | 0.00193294           | 3.31357            | 3.31357                      | T up vs N                              | 13.707  | 13.4429   | 15.6917    | 1         |
| cg09276998  | SVIL                                                        | 3.87E-05          | 3.87E-05             | 0.17684            | -5.65481                     | T down vs N                            | 31.527  | 28.1133   | 14.2677    | 1         |
| cg09277749  | UCK2                                                        | 0.00536466        | 0.00536466           | 0.248461           | -4.02477                     | T down vs N                            | 10.359  | 18.1607   | 28.0503    | 1         |
| cg09279512  | PKP1;PKP1                                                   | 3.07E-05          | 3.07E-05             | 5.19575            | 5.19575                      | T up vs N                              | 32.9    | 25.4327   | 12.3683    | 1         |
| cg09279616  | AIM1L                                                       | 8.09E-05          | 8.09E-05             | 0.311163           | -3.21375                     | T down vs N                            | 27.46   | 12.7652   | 7.43776    | 1         |
| cg09279736  | RNF39;RNF39                                                 | 0.00028295        | 0.000282946          | 3.64633            | 3.64633                      | T up vs N                              | 21.359  | 15.6763   | 11.7433    | 1         |
| cg09281979  | DCAF17;METTL8;DCAF17;DCAF17                                 | 0.00700884        | 0.00700884           | 0.240949           | -4.15025                     | T down vs N                            | 9.5551  | 18.9703   | 31.7657    | 1         |
| cg09282258  | PRR15                                                       | 9.94E-06          | 9.94E-06             | 18.2946            | 18.2946                      | T up vs N                              | 40.109  | 79.1286   | 31.5652    | 1         |
| cg09282497  | KCNK3                                                       | 0.00257477        | 0.00257477           | 12.2337            | 12.2337                      | T up vs N                              | 12.72   | 58.7351   | 73.8781    | 1         |
| cg09286599  | CLEC4G1                                                     | 1.94E-05          | 1.94E-05             | 0.183144           | -5.46019                     | T down vs N                            | 35.702  | 26.9881   | 12.095     | 1         |
| cg09291026  | C14orf145                                                   | 0.00435754        | 0.00435754           | 0.325808           | -3.06929                     | T down vs N                            | 11.005  | 11.7793   | 17.1265    | 1         |
| cg09292077  | ASH1L;MIR555                                                | 0.00016375        | 0.000163748          | 0.242444           | -4.12467                     | T down vs N                            | 23.904  | 18.8058   | 12.5874    | 1         |
| cg09293773  | OR9Q2;OR9Q2                                                 | 1.32E-05          | 1.32E-05             | 0.159036           | -6.28788                     | T down vs N                            | 38.198  | 31.6627   | 13.2626    | 1         |
| cg09295050  | ITGA7                                                       | 0.00033328        | 0.00033328           | 0.292235           | -3.42191                     | T down vs N                            | 20.63   | 14.1746   | 10.9932    | 1         |
| cg09296957  | ACY3                                                        | 0.00501114        | 0.00501114           | 0.237476           | -4.21096                     | T down vs N                            | 10.569  | 19.3594   | 29.3086    | 1         |
| cg09297514  | CAMKK2;CAMKK2;CAMKK2;CAMKK2;CAMKK2                          | 0.00042212        | 0.00042212           | 0.136909           | -7.30412                     | T down vs N                            | 24.7    | 22.7894   | 10.1491    | 1         |
| cg09299390  | MAD1L1;MAD1L1;MAD1L1                                        | 0.00140186        | 0.00140186           | 3.91372            | 3.91372                      | T up vs N                              | 14.857  | 17.4382   | 18.7792    | 1         |
| cg09300114  | SLC16A5                                                     | 1.48E-05          | 1.48E-05             | 4.73536            | 4.73536                      | T up vs N                              | 37.459  | 22.6493   | 9.67418    | 1         |
| cg09301200  | MUM1;MUM1                                                   | 0.00397386        | 0.00397386           | 0.332033           | -3.01175                     | T down vs N                            | 11.297  | 11.3851   | 16.1255    | 1         |
| cg09301462  | TMEM200A                                                    | 9.29E-05          | 9.29E-05             | 0.332352           | -3.00886                     | T down vs N                            | 26.735  | 11.3653   | 6.8017     | 1         |
| cg09304381  | THRA;NR1D1                                                  | 5.56E-06          | 5.56E-06             | 3.48665            | 3.48665                      | T up vs N                              | 44.245  | 14.6099   | 5.28324    | 1         |
| cg09304617  | TCF7L1                                                      | 0.00018302        | 0.000183017          | 0.246437           | -4.05783                     | T down vs N                            | 23.372  | 18.3747   | 12.5789    | 1         |
| cg09305491  | PRKCB;PRKCB                                                 | 0.00066958        | 0.000669583          | 0.301168           | -3.32041                     | T down vs N                            | 17.693  | 13.4892   | 12.1984    | 1         |
| cg09305680  | UTP23                                                       | 0.00082259        | 0.00082259           | 0.254924           | -3.92274                     | T down vs N                            | 16.876  | 17.4971   | 16.5889    | 1         |
| cg09307689  | C11orf35                                                    | 0.00256439        | 0.00256439           | 0.211914           | -4.71889                     | T down vs N                            | 12.734  | 22.5479   | 28.3308    | 1         |
| cg09309261  | LHX5                                                        | 1.17E-05          | 1.17E-05             | 0.255342           | -3.91631                     | T down vs N                            | 39.012  | 17.4551   | 7.15888    | 1         |
| cg09309269  | PSMD11                                                      | 0.00352746        | 0.00352746           | 0.243685           | -4.10365                     | T down vs N                            | 11.679  | 18.6705   | 25.5775    | 1         |
| cg09312407  | DNAJC5B                                                     | 0.00068041        | 0.000680409          | 0.182615           | -5.47599                     | T down vs N                            | 17.629  | 27.0801   | 24.5782    | 1         |
| cg09313831  | MUC12                                                       | 0.00041043        | 0.000410434          | 0.299558           | -3.33826                     | T down vs N                            | 19.726  | 13.61     | 11.0393    | 1         |
| cg09313931  | ZC3H12D                                                     | 0.00040825        | 0.000408245          | 0.184136           | -5.43076                     | T down vs N                            | 19.749  | 26.8165   | 21.726     | 1         |
| cg09314708  | OPCML;OPCML;OPCML                                           | 0.00072906        | 0.000729059          | 4.29826            | 4.29826                      | T up vs N                              | 17.353  | 19.916    | 18.3636    | 1         |
| cg09315775  | ORS2R1                                                      | 0.00488677        | 0.00488677           | 0.26345            | -3.79579                     | T down vs N                            | 10.646  | 16.6649   | 25.0451    | 1         |
| cg09317502  | HEPACAM2                                                    | 4.38E-05          | 4.38E-05             | 0.278306           | -3.59317                     | T down vs N                            | 30.817  | 15.3224   | 7.9553     | 1         |
| cg09317884  | LMX1A                                                       | 0.00229119        | 0.00229119           | 3.47384            | 3.47384                      | T up vs N                              | 13.118  | 14.5238   | 17.7154    | 1         |
| cg09319797  | TNFRSF17                                                    | 0.00022956        | 0.000229555          | 0.167157           | -5.9824                      | T down vs N                            | 22.311  | 29.9706   | 21.493     | 1         |
| cg09319822  | C10orf2;MRPL43;C10orf2;C10orf2;MRPL43;MRPL43;MRPL43;C10orf2 | 4.05E-05          | 4.05E-05             | 0.258231           | -3.8725                      | T down vs N                            | 31.267  | 17.1686   | 8.78546    | 1         |
| cg09319828  | TTC24                                                       | 9.81E-07          | 9.81E-07             | 0.066903           | -14.9471                     | T down vs N                            | 58.564  | 68.5081   | 18.7166    | 1         |
| cg09320690  | EHF2                                                        | 3.29E-07          | 3.29E-07             | 0.220261           | -4.54006                     | T down vs N                            | 69.327  | 21.439    | 4.9479     | 1         |
| cg09322513  | LOC283867                                                   | 0.00100831        | 0.00100831           | 0.296766           | -3.36965                     | T down vs N                            | 16.089  | 13.8222   | 13.7461    | 1         |
| cg09324113  | TEX14;TEX14                                                 | 0.00045203        | 0.000452031          | 0.09621            | 0.09621                      | T up vs N                              | 19.315  | 18.6225   | 15.4265    | 1         |
| cg09325404  | PLEKHH2;LOC728819                                           | 2.27E-05          | 2.27E-05             | 0.276319           | -3.619                       | T down vs N                            | 34.735  | 15.4945   | 7.13714    | 1         |
| cg09326204  | CASR                                                        | 0.00108655        | 0.00108655           | 0.323492           | -3.09127                     | T down vs N                            | 15.805  | 11.9297   | 12.0771    | 1         |
| cg09329407  | PAX7;PAX7;PAX7                                              | 7.99E-09          | 7.99E-09             | 0.260414           | -3.84003                     | T down vs N                            | 119.2   | 16.9557   | 2.27596    | 1         |
| cg09330885  | MUC4;MUC4;MUC4                                              | 0.00394916        | 0.00394916           | 0.324034           | -3.08609                     | T down vs N                            | 11.316  | 11.8942   | 16.8171    | 1         |
| cg09330909  | SCARNA8;HAUS6                                               | 1.15E-05          | 1.15E-05             | 0.173461           | -5.76497                     | T down vs N                            | 39.117  | 28.7429   | 11.7568    | 1         |
| cg09331335  | NFIX                                                        | 0.0037301         | 0.0037301            | 3.07153            | 3.07153                      | T up vs N                              | 11.499  | 11.7946   | 16.4112    | 1         |
| cg09332353  | PRSS16                                                      | 5.97E-06          | 5.97E-06             | 0.21361            | -4.68143                     | T down vs N                            | 43.721  | 22.3169   | 8.16708    | 1         |
| cg09333392  | OR4D2                                                       | 0.00016232        | 0.000162318          | 0.230938           | -4.33016                     | T down vs N                            | 23.947  | 20.1185   | 13.4422    | 1         |

| Probeset ID | UCSC_REFGENE_NAME                                            | p-value<br>(Type) | p-value (T vs.<br>N) | Ratio (T<br>vs. N) | Fold-<br>Change (T<br>vs. N) | Fold-Change (T vs.<br>N) (Description) | F(Type) | SS (Type) | SS (Error) | F (Error) |
|-------------|--------------------------------------------------------------|-------------------|----------------------|--------------------|------------------------------|----------------------------------------|---------|-----------|------------|-----------|
| cg09334731  | CAMTA1                                                       | 0.0002019         | 0.000201899          | 0.306288           | -3.2649                      | T down vs N                            | 22.909  | 13.1129   | 9.15847    | 1         |
| cg09336508  | DNAH3                                                        | 0.00025856        | 0.000258557          | 0.251805           | -3.97133                     | T down vs N                            | 21.766  | 17.8137   | 13.0947    | 1         |
| cg09336671  | CIITA                                                        | 1.66E-05          | 1.66E-05             | 0.220683           | -4.53139                     | T down vs N                            | 36.681  | 21.3849   | 9.32792    | 1         |
| cg09339219  | FZD2                                                         | 6.15E-05          | 6.15E-05             | 6.72205            | 6.72205                      | T up vs N                              | 28.928  | 34.0041   | 18.8076    | 1         |
|             | UGT1A10;UGT1A6;UGT1A8;UGT1A4;UGT1A3;UGT1A6;UGT1A9;UGT1A7;UGT |                   |                      |                    |                              |                                        |         |           |            |           |
| cg09339841  | 1A5                                                          | 7.75E-06          | 7.75E-06             | 0.172898           | -5.78375                     | T down vs N                            | 41.843  | 28.8498   | 11.0317    | 1         |
| cg09340279  | SECTM1                                                       | 0.00048576        | 0.000485762          | 0.158238           | -6.31959                     | T down vs N                            | 19.012  | 31.8361   | 26.7929    | 1         |
| cg09340639  | FCRL1;FCRL1;FCRL1                                            | 6.28E-07          | 6.28E-07             | 0.113764           | -8.79009                     | T down vs N                            | 62.784  | 44.2518   | 11.2772    | 1         |
| cg09341448  | SEC1                                                         | 1.22E-05          | 1.22E-05             | 0.298568           | -3.34932                     | T down vs N                            | 38.734  | 13.6849   | 5.65281    | 1         |
| cg09343092  | HoxA6                                                        | 0.00337176        | 0.00337176           | 5.42936            | 5.42936                      | T up vs N                              | 11.826  | 26.8084   | 36.2706    | 1         |
| cg09344629  | WDR33                                                        | 0.0022587         | 0.0022587            | 0.28225            | -3.54296                     | T down vs N                            | 13.167  | 14.987    | 18.2123    | 1         |
| cg09344631  | COL11A2;COL11A2;COL11A2                                      | 0.00025022        | 0.00025022           | 0.323292           | -3.09318                     | T down vs N                            | 21.915  | 11.9427   | 8.71915    | 1         |
| cg09345786  | AP2B1;AP2B1                                                  | 1.45E-06          | 1.45E-06             | 0.18163            | -5.50569                     | T down vs N                            | 55.039  | 27.2526   | 7.92244    | 1         |
| cg09346831  | MIRGPRX1                                                     | 0.00010858        | 0.000108583          | 0.313371           | -3.19111                     | T down vs N                            | 25.937  | 12.6111   | 7.77965    | 1         |
| cg09347495  | CLIC5                                                        | 1.39E-05          | 1.39E-05             | 0.159729           | -6.26059                     | T down vs N                            | 37.867  | 31.513    | 13.3151    | 1         |
| cg09348360  | SCAND3                                                       | 0.00415503        | 0.00415503           | 0.250466           | -3.99256                     | T down vs N                            | 11.155  | 17.9517   | 25.7492    | 1         |
| cg09355175  | DGKD;DGKD                                                    | 0.00014608        | 0.000146077          | 3.01231            | 3.01231                      | T up vs N                              | 24.459  | 11.3889   | 7.45021    | 1         |
| cg09356141  | LALBA                                                        | 0.00091377        | 0.000913772          | 0.243593           | -4.10521                     | T down vs N                            | 16.467  | 18.6805   | 18.151     | 1         |
| cg09357761  | PRKCH                                                        | 0.00020309        | 0.000203094          | 0.299778           | -3.3358                      | T down vs N                            | 22.881  | 13.5934   | 9.50557    | 1         |
| cg09358376  | OR6C74                                                       | 6.26E-05          | 6.26E-05             | 0.190451           | -5.2507                      | T down vs N                            | 28.829  | 25.7584   | 14.2959    | 1         |
| cg09360041  | ABCA4                                                        | 0.00301347        | 0.00301347           | 0.326543           | -3.06238                     | T down vs N                            | 12.195  | 11.732    | 15.3929    | 1         |
| cg09361748  | CALN1;CALN1                                                  | 8.68E-06          | 8.68E-06             | 0.209689           | -4.76897                     | T down vs N                            | 41.05   | 22.8558   | 8.90851    | 1         |
| cg09362969  | LOC100133612                                                 | 3.62E-06          | 3.62E-06             | 0.224743           | -4.44953                     | T down vs N                            | 47.509  | 20.872    | 7.02923    | 1         |
| cg09363587  | LGR6;LGR6;LGR6                                               | 0.00228863        | 0.00228863           | 6.27177            | 6.27177                      | T up vs N                              | 13.121  | 31.5744   | 38.5014    | 1         |
| cg09363891  | PIK3C2G                                                      | 5.06E-05          | 5.06E-05             | 0.201724           | -4.95727                     | T down vs N                            | 30.012  | 24.003    | 12.7965    | 1         |
| cg09365002  | DAXX;DAXX;DAXX;DAXX                                          | 0.00067071        | 0.000670712          | 0.105714           | -9.45945                     | T down vs N                            | 17.686  | 47.2904   | 42.7813    | 1         |
| cg09366312  | TMEM200C                                                     | 0.00259591        | 0.00259591           | 3.56673            | 3.56673                      | T up vs N                              | 12.693  | 15.1459   | 19.0922    | 1         |
| cg09366677  | PAPOLA                                                       | 3.89E-05          | 3.89E-05             | 0.282569           | -3.53896                     | T down vs N                            | 31.506  | 14.9604   | 7.59758    | 1         |
| cg09367967  | CALR                                                         | 0.00052261        | 0.000522608          | 0.275124           | -3.63473                     | T down vs N                            | 18.707  | 15.5991   | 13.3422    | 1         |
| cg09368188  | KIF26B                                                       | 0.00650487        | 0.00650487           | 0.294168           | -3.39941                     | T down vs N                            | 9.7765  | 14.0231   | 22.9497    | 1         |
| cg09368936  | HAAO                                                         | 5.95E-05          | 5.95E-05             | 9.91849            | 9.91849                      | T up vs N                              | 29.114  | 49.306    | 27.0971    | 1         |
| cg09369190  | OR9Q2                                                        | 0.0002698         | 0.0002698            | 0.20225            | -4.94438                     | T down vs N                            | 21.573  | 23.925    | 17.7444    | 1         |
| cg09370463  | ARHGAP18                                                     | 0.00043484        | 0.000434838          | 0.288322           | -3.46835                     | T down vs N                            | 19.479  | 14.487    | 11.8993    | 1         |
| cg09370594  | LINGO3                                                       | 2.77E-05          | 2.77E-05             | 8.19381            | 8.19381                      | T up vs N                              | 33.513  | 41.4378   | 19.7835    | 1         |
| cg09370867  | FRG;FRG                                                      | 4.13E-05          | 4.13E-05             | 4.61802            | 4.61802                      | T up vs N                              | 31.156  | 21.9243   | 11.2592    | 1         |
| cg09371084  | OR2A12                                                       | 0.00548379        | 0.00548379           | 0.268126           | -3.72959                     | T down vs N                            | 10.292  | 16.2282   | 25.229     | 1         |
| cg09371351  | HSD3B2;HSD3B2                                                | 3.13E-05          | 3.13E-05             | 0.263473           | -3.79546                     | T down vs N                            | 32.774  | 16.6627   | 8.13473    | 1         |
| cg09373136  | TCAM1                                                        | 1.87E-07          | 1.87E-07             | 0.135847           | -7.36121                     | T down vs N                            | 75.514  | 37.3233   | 7.90817    | 1         |
| cg09374293  | PRMT2;PRMT2                                                  | 0.0070044         | 0.0070044            | 4.01288            | 4.01288                      | T up vs N                              | 9.557   | 18.0836   | 30.275     | 1         |
| cg09374772  | KIAA1949;KIAA1949                                            | 2.57E-07          | 2.57E-07             | 0.28653            | -3.49003                     | T down vs N                            | 71.954  | 14.6325   | 3.25377    | 1         |
| cg09375488  | ASB4;ASB4                                                    | 1.25E-05          | 1.25E-05             | 0.152612           | -6.55255                     | T down vs N                            | 38.553  | 33.0986   | 13.7365    | 1         |
| cg09376835  | ASAP1                                                        | 0.00058137        | 0.000581371          | 0.272005           | -3.6764                      | T down vs N                            | 18.267  | 15.8759   | 13.9058    | 1         |
| cg09378284  | GPX6                                                         | 0.00441607        | 0.00441607           | 0.281328           | -3.55457                     | T down vs N                            | 10.963  | 15.0647   | 21.9872    | 1         |
| cg09379385  | HIST1H2AI                                                    | 2.19E-05          | 2.19E-05             | 11.5896            | 11.5896                      | T up vs N                              | 34.952  | 56.2254   | 25.7385    | 1         |
| cg09381737  | C9orf167                                                     | 0.001339          | 0.001339             | 3.08143            | 3.08143                      | T up vs N                              | 15.026  | 11.8624   | 12.6316    | 1         |
| cg09382096  | PAX6;PAX6;PAX6                                               | 4.21E-05          | 4.21E-05             | 4.71707            | 4.71707                      | T up vs N                              | 31.042  | 22.5367   | 11.6162    | 1         |
| cg09382693  | DDX19A                                                       | 1.86E-05          | 1.86E-05             | 0.316824           | -3.15632                     | T down vs N                            | 35.957  | 12.374    | 5.50607    | 1         |
| cg09383172  | PTPRN2;PTPRN2;PTPRN2                                         | 0.00018462        | 0.000184617          | 0.112833           | -8.86266                     | T down vs N                            | 23.331  | 44.5872   | 30.5775    | 1         |
| cg09383389  | GPR160                                                       | 1.89E-05          | 1.89E-05             | 0.278135           | -3.59538                     | T down vs N                            | 35.88   | 15.3371   | 6.83926    | 1         |
| cg09387749  | HOXD3                                                        | 0.00046547        | 0.000465468          | 4.58922            | 4.58922                      | T up vs N                              | 19.191  | 21.7453   | 18.1295    | 1         |
| cg09387970  | OR4C6                                                        | 2.65E-05          | 2.65E-05             | 0.289809           | -3.45055                     | T down vs N                            | 33.773  | 14.3673   | 6.80648    | 1         |
| cg09388920  | MRPS28                                                       | 1.02E-05          | 1.02E-05             | 0.155648           | -6.42477                     | T down vs N                            | 39.954  | 32.4088   | 12.9786    | 1         |
| cg09395969  | EDC4;NRN1L                                                   | 5.22E-06          | 5.22E-06             | 3.40146            | 3.40146                      | T up vs N                              | 44.715  | 14.0368   | 5.02268    | 1         |
| cg09399225  | MIR147                                                       | 2.88E-06          | 2.88E-06             | 0.154015           | -6.49288                     | T down vs N                            | 49.311  | 32.7773   | 10.6353    | 1         |
| cg09404289  | MIR526A1                                                     | 6.45E-05          | 6.45E-05             | 0.250237           | -3.99622                     | T down vs N                            | 28.668  | 17.9754   | 10.0322    | 1         |
| cg09404446  | KIFC1                                                        | 0.00017614        | 0.000176141          | 0.290797           | -3.43883                     | T down vs N                            | 23.554  | 14.2885   | 9.70586    | 1         |
| cg09404516  | SPTBN1;SPTBN1                                                | 6.85E-05          | 6.85E-05             | 3.32842            | 3.32842                      | T up vs N                              | 28.347  | 13.5435   | 7.64451    | 1         |
| cg09404551  | COL14A1                                                      | 0.00023565        | 0.000235654          | 6.56098            | 6.56098                      | T up vs N                              | 22.19   | 33.1439   | 23.8981    | 1         |
| cg09407660  | GCNT3                                                        | 0.00012243        | 0.000122425          | 0.219237           | -4.56127                     | T down vs N                            | 25.332  | 21.5713   | 13.6247    | 1         |
| cg09410453  | ABAT;ABAT;ABAT                                               | 2.64E-06          | 2.64E-06             | 0.148687           | -6.72556                     | T down vs N                            | 50.03   | 34.0227   | 10.8808    | 1         |
| cg09411597  | C10orf18                                                     | 9.74E-06          | 9.74E-06             | 0.20096            | -4.9761                      | T down vs N                            | 40.252  | 24.1169   | 9.58626    | 1         |
| cg09414638  | ESR1;ESR1;ESR1;ESR1                                          | 6.94E-05          | 6.94E-05             | 0.321941           | -3.10616                     | T down vs N                            | 28.278  | 12.0315   | 6.80752    | 1         |
| cg09415518  | TMPRSS11B                                                    | 2.27E-06          | 2.27E-06             | 0.13925            | -7.18135                     | T down vs N                            | 51.272  | 36.4041   | 11.3603    | 1         |
| cg09416154  | CD164;CD164;CD164;CD164;CD164                                | 3.76E-06          | 3.76E-06             | 0.182813           | -5.47008                     | T down vs N                            | 47.215  | 27.0457   | 9.16506    | 1         |
| cg09416908  | ME3;ME3;ME3                                                  | 5.10E-05          | 5.10E-05             | 0.272854           | -3.66496                     | T down vs N                            | 29.968  | 15.8      | 8.43555    | 1         |
| cg09417355  | LCE6A                                                        | 0.00184443        | 0.00184443           | 0.161609           | -6.18779                     | T down vs N                            | 13.872  | 31.1124   | 35.8854    | 1         |
| cg09419444  | WWP2;WWP2                                                    | 0.00082533        | 0.000825329          | 0.305515           | -3.27316                     | T down vs N                            | 16.863  | 13.169    | 12.4952    | 1         |
| cg09420319  | ANKRD11                                                      | 0.00279021        | 0.00279021           | 3.20265            | 3.20265                      | T up vs N                              | 12.451  | 12.6897   | 16.3073    | 1         |
| cg09423283  | GRM1;GRM1                                                    | 0.000227          | 0.000226995          | 9.61097            | 9.61097                      | T up vs N                              | 22.363  | 47.9617   | 34.3153    | 1         |
| cg09424271  | AFF2;AFF2;AFF2;AFF2;AFF2                                     | 2.48E-05          | 2.48E-05             | 0.21345            | -4.68494                     | T down vs N                            | 34.176  | 22.3385   | 10.4581    | 1         |

| Probeset ID                       | UCSC_REFGENE_NAME             | p-value<br>(Type) | p-value (T vs.<br>N) | Ratio (T<br>vs. N) | Fold-<br>Change (T<br>vs. N) | Fold-Change (T vs.<br>N) (Description) | F(Type) | SS (Type) | SS (Error) | F (Error) |
|-----------------------------------|-------------------------------|-------------------|----------------------|--------------------|------------------------------|----------------------------------------|---------|-----------|------------|-----------|
| cg09424896                        | CIB3                          | 2.87E-06          | 2.87E-06             | 0.195987           | -5.10239                     | T down vs N                            | 49.333  | 24.8761   | 8.06805    | 1         |
| cg09428340                        | PACRG;PACRG;PACRG             | 0.00692279        | 0.00692279           | 3.69389            | 3.69389                      | T up vs N                              | 9.5916  | 15.9919   | 26.6765    | 1         |
| cg09428349                        | C2CD2;C2CD2                   | 1.35E-06          | 1.35E-06             | 0.175942           | -5.68368                     | T down vs N                            | 55.671  | 28.2788   | 8.12738    | 1         |
| cg09431525                        | DLL3;DLL3                     | 0.00205226        | 0.00205226           | 3.34877            | 3.34877                      | T up vs N                              | 13.498  | 13.6812   | 16.2173    | 1         |
| cg09434193                        | HBA1                          | 0.00181325        | 0.00181325           | 0.175137           | -5.70982                     | T down vs N                            | 13.932  | 28.4283   | 32.6478    | 1         |
| cg09437783                        | FOXI3                         | 2.49E-06          | 2.49E-06             | 0.28224            | -3.54308                     | T down vs N                            | 50.49   | 14.9879   | 4.74962    | 1         |
| cg09440270                        | CYP26C1                       | 1.05E-05          | 1.05E-05             | 3.30564            | 3.30564                      | T up vs N                              | 39.758  | 13.3892   | 5.38831    | 1         |
| cg09440788                        | RAB11FIP1;RAB11FIP1           | 0.00311845        | 0.00311845           | 5.7658             | 5.7658                       | T up vs N                              | 12.082  | 28.7476   | 38.071     | 1         |
| cg09442403                        | TM4SF1                        | 0.00516389        | 0.00516389           | 0.312287           | -3.20219                     | T down vs N                            | 10.476  | 12.6866   | 19.3762    | 1         |
| cg09443388                        | XKR4                          | 0.00207959        | 0.00207959           | 0.312761           | -3.19733                     | T down vs N                            | 13.452  | 12.6535   | 15.0504    | 1         |
| cg09445803                        | LOC283999                     | 0.00572828        | 0.00572828           | 3.29812            | 3.29812                      | T up vs N                              | 10.159  | 13.3382   | 21.0071    | 1         |
| cg09446908                        | CLDN5;CLDN5;CLDN5             | 0.00407339        | 0.00407339           | 4.81361            | 4.81361                      | T up vs N                              | 11.218  | 23.1292   | 32.9895    | 1         |
| cg09448875                        | ABCC2                         | 0.00036018        | 0.000360175          | 0.261094           | -3.83004                     | T down vs N                            | 20.291  | 16.8901   | 13.3187    | 1         |
| cg09448880                        | PGLYRP3                       | 2.91E-06          | 2.91E-06             | 0.135771           | -7.36532                     | T down vs N                            | 49.231  | 37.3442   | 12.1367    | 1         |
| cg09450063                        | TNFSF13B;TNFSF13B             | 0.00012203        | 0.000122031          | 0.284278           | -3.51769                     | T down vs N                            | 25.348  | 14.8179   | 9.3532     | 1         |
| cg09451188                        | SLC25A30                      | 0.00550307        | 0.00550307           | 0.236229           | -3.63229                     | T down vs N                            | 10.281  | 15.5829   | 24.251     | 1         |
| cg09451215                        | FAM46A                        | 2.23E-05          | 2.23E-05             | 0.093901           | -10.6495                     | T down vs N                            | 34.838  | 52.4097   | 24.0704    | 1         |
| cg09451427                        | CACNA2D2;CACNA2D2             | 0.00590138        | 0.00590138           | 0.192312           | -5.19989                     | T down vs N                            | 10.069  | 25.4573   | 40.453     | 1         |
| cg09452568                        | ESM1;ESM1                     | 0.00022508        | 0.000225083          | 0.147915           | -6.76063                     | T down vs N                            | 22.402  | 34.2087   | 24.4326    | 1         |
| cg09452848                        | CDON                          | 3.57E-05          | 3.57E-05             | 0.229589           | -4.3556                      | T down vs N                            | 32.008  | 20.2796   | 10.1374    | 1         |
| cg09453312                        | ITK                           | 1.10E-05          | 1.10E-05             | 0.204218           | -4.89672                     | T down vs N                            | 39.438  | 23.6359   | 9.58906    | 1         |
| cg09453636                        | CRYGD                         | 1.92E-05          | 1.92E-05             | 0.256202           | -3.90317                     | T down vs N                            | 35.784  | 17.3693   | 7.76638    | 1         |
| cg09453870                        | MIR548H4;NOX5                 | 0.00715579        | 0.00715579           | 3.67754            | 3.67754                      | T up vs N                              | 9.4939  | 15.8835   | 26.7683    | 1         |
| cg09456094                        | SP100;SP100;SP100;SP100       | 1.11E-05          | 1.11E-05             | 0.250375           | -3.99401                     | T down vs N                            | 39.343  | 17.9611   | 7.30441    | 1         |
| cg09456254                        | C21orf130                     | 2.22E-05          | 2.22E-05             | 0.192628           | -5.19136                     | T down vs N                            | 34.866  | 25.4066   | 11.6591    | 1         |
| cg09456445                        | DOCK3                         | 0.00249592        | 0.00249592           | 0.3282             | -3.04692                     | T down vs N                            | 12.826  | 11.6261   | 14.5036    | 1         |
| cg09457527                        | SNORD115-40                   | 0.00230402        | 0.00230402           | 0.30075            | -3.32502                     | T down vs N                            | 13.098  | 13.5205   | 16.5157    | 1         |
| cg09457725                        | PRR3;PRR3                     | 8.06E-05          | 8.06E-05             | 0.236242           | -4.23294                     | T down vs N                            | 27.482  | 19.4999   | 11.3529    | 1         |
| cg09459548                        | PRR16                         | 0.00041799        | 0.000417986          | 0.246974           | -4.049                       | T down vs N                            | 19.648  | 18.3176   | 14.9166    | 1         |
| cg09460345                        | HPVC1                         | 0.00011357        | 0.000113573          | 0.308043           | -3.2463                      | T down vs N                            | 25.709  | 12.9866   | 8.08216    | 1         |
| cg09462350                        | CXCR7                         | 0.00065728        | 0.000657283          | 0.119188           | -8.39014                     | T down vs N                            | 17.768  | 42.376    | 38.1597    | 1         |
|                                   |                               |                   |                      |                    |                              |                                        |         |           |            |           |
| MRPL55;MRPL55;MRPL55;MRPL55;M     |                               |                   |                      |                    |                              |                                        |         |           |            |           |
| cg09462576                        | RPL55;MRPL55;MRPL55;MRPL55    | 0.00087896        | 0.000878963          | 0.229924           | -4.34926                     | T down vs N                            | 16.617  | 20.2395   | 19.4877    | 1         |
| cg09462924                        | MEI51                         | 0.00071387        | 0.000713865          | 0.096012           | -10.4154                     | T down vs N                            | 17.972  | 48.4042   | 40.399     | 1         |
| cg09464206                        | CASP8;CASP8;CASP8;CASP8       | 1.26E-06          | 1.26E-06             | 0.276335           | -3.6188                      | T down vs N                            | 56.291  | 15.4931   | 4.40371    | 1         |
| cg09464728                        | CYGB                          | 0.00184481        | 0.00184481           | 3.37361            | 3.37361                      | T up vs N                              | 13.871  | 13.8489   | 15.9743    | 1         |
|                                   |                               |                   |                      |                    |                              |                                        |         |           |            |           |
| PCDHGA4;PCDHGA6;PCDHG86;PCDHG     |                               |                   |                      |                    |                              |                                        |         |           |            |           |
| A9;PCDHGA1;PCDHGA8;PCDHGA5;PC     |                               |                   |                      |                    |                              |                                        |         |           |            |           |
| cg09465698                        | DHGB1;PCDHGB4;PCDHGA3;PCDHGA2 | 0.00057973        | 0.00057973           | 8.36444            | 8.36444                      | T up vs N                              | 18.278  | 42.2538   | 36.9869    | 1         |
| cg09472802                        | PKP1;PKP1;PKP1;PKP1           | 0.00014507        | 0.000145069          | 7.3056             | 7.3056                       | T up vs N                              | 24.493  | 37.0403   | 24.1969    | 1         |
| cg09474442                        | TMEM37                        | 0.00013534        | 0.00013534           | 3.72743            | 3.72743                      | T up vs N                              | 24.834  | 16.2139   | 10.4464    | 1         |
| cg09476963                        | MYL10;MYL10                   | 7.97E-06          | 7.97E-06             | 0.18168            | -5.50418                     | T down vs N                            | 41.647  | 27.2439   | 10.4665    | 1         |
| cg09477740                        | MT1DP;MT1DP                   | 2.31E-06          | 2.31E-06             | 5.10389            | 5.10389                      | T up vs N                              | 51.107  | 24.8851   | 7.79078    | 1         |
|                                   |                               |                   |                      |                    |                              |                                        |         |           |            |           |
| cg09478478                        | CD1E;CD1E;CD1E;CD1E;CD1E;CD1E | 5.95E-07          | 5.95E-07             | 0.149485           | -6.68965                     | T down vs N                            | 63.312  | 33.8318   | 8.54985    | 1         |
| cg09479241                        | TLCD1;TLCD1                   | 0.00475023        | 0.00475023           | 0.320643           | -3.11873                     | T down vs N                            | 10.734  | 12.1174   | 18.0614    | 1         |
| cg09480054                        | HAAO                          | 2.96E-05          | 2.96E-05             | 8.78668            | 8.78668                      | T up vs N                              | 33.109  | 44.236    | 21.3772    | 1         |
| cg09480855                        | TXNDC11                       | 2.78E-06          | 2.78E-06             | 0.270063           | -3.70284                     | T down vs N                            | 49.612  | 16.0512   | 5.17655    | 1         |
| cg09482050                        | RLTPR                         | 0.00357304        | 0.00357304           | 3.67212            | 3.67212                      | T up vs N                              | 11.638  | 15.8475   | 21.7877    | 1         |
| cg09483067                        | TNFRSF1A                      | 7.79E-06          | 7.79E-06             | 0.220327           | -4.53872                     | T down vs N                            | 41.81   | 21.4307   | 8.20117    | 1         |
| cg09487078                        | CCR6;CCR6                     | 2.43E-05          | 2.43E-05             | 0.266884           | -3.74694                     | T down vs N                            | 34.316  | 16.3428   | 7.61993    | 1         |
| cg09487101                        | EFNA2                         | 0.00153343        | 0.00153343           | 0.252889           | -3.95431                     | T down vs N                            | 14.531  | 17.7029   | 19.4921    | 1         |
| cg09490880                        | CCDC149;CCDC149               | 0.00043541        | 0.000435411          | 0.256177           | -3.90355                     | T down vs N                            | 19.474  | 17.3718   | 14.2729    | 1         |
| cg09491120                        | FOXF2                         | 0.00067169        | 0.000671686          | 0.27374            | -3.6531                      | T down vs N                            | 17.681  | 15.7213   | 14.2269    | 1         |
| cg09492640                        | ZNF177                        | 2.20E-05          | 2.20E-05             | 0.300833           | -3.3241                      | T down vs N                            | 34.909  | 13.5143   | 6.19411    | 1         |
| SLC26A5;SLC26A5;SLC26A5;SLC26A5;S |                               |                   |                      |                    |                              |                                        |         |           |            |           |
| cg09492887                        | LC26A5                        | 5.90E-06          | 5.90E-06             | 6.47287            | 6.47287                      | T up vs N                              | 43.813  | 32.6692   | 11.9303    | 1         |
| cg09493313                        | HLA-DPA1                      | 0.00573245        | 0.00573245           | 0.326857           | -3.05944                     | T down vs N                            | 10.157  | 11.7118   | 18.4496    | 1         |
| cg09494646                        | MIR33B;SREBF1;SREBF1          | 2.95E-05          | 2.95E-05             | 3.45772            | 3.45772                      | T up vs N                              | 33.14   | 14.4156   | 6.95992    | 1         |
| cg09495303                        | CHRNAE;C17orf107              | 7.46E-06          | 7.46E-06             | 3.59417            | 3.59417                      | T up vs N                              | 42.121  | 15.3291   | 5.82295    | 1         |
| cg09496748                        | ANKRD44                       | 0.000183          | 0.000183004          | 8.66646            | 8.66646                      | T up vs N                              | 23.372  | 43.6769   | 29.8998    | 1         |
| cg09498007                        | CREG2                         | 0.00011076        | 0.00011076           | 0.213179           | -4.69089                     | T down vs N                            | 25.836  | 22.3753   | 13.8568    | 1         |
| cg09499136                        | SMOC2;SMOC2                   | 3.61E-05          | 3.61E-05             | 0.228097           | -4.38411                     | T down vs N                            | 31.943  | 20.4598   | 10.2483    | 1         |
| cg09499256                        | FPR2                          | 3.13E-07          | 3.13E-07             | 0.243866           | -4.10061                     | T down vs N                            | 69.837  | 18.6509   | 4.27299    | 1         |
| cg09499629                        | KLF14                         | 0.00556958        | 0.00556958           | 3.59862            | 3.59862                      | T up vs N                              | 10.244  | 15.3587   | 23.9876    | 1         |
| cg09500443                        | SCGB3A1;SCGB3A1               | 0.00442328        | 0.00442328           | 4.74613            | 4.74613                      | T up vs N                              | 10.957  | 22.7155   | 33.1693    | 1         |
| cg09501469                        | MED16                         | 0.0006357         | 0.000635695          | 0.248897           | -4.01773                     | T down vs N                            | 17.903  | 18.115    | 16.1896    | 1         |
| cg09501687                        | C5orf62                       | 3.15E-05          | 3.15E-05             | 0.186431           | -5.36392                     | T down vs N                            | 32.73   | 26.4255   | 12.9181    | 1         |
| cg09502111                        | KLHDC8A                       | 1.81E-05          | 1.81E-05             | 0.197662           | -5.05914                     | T down vs N                            | 36.152  | 24.6169   | 10.8948    | 1         |
| cg09505809                        | QSOX1;QSOX1                   | 0.00039373        | 0.00039373           | 0.325778           | -3.06957                     | T down vs N                            | 19.905  | 11.7812   | 9.47017    | 1         |

| Probeset ID | UCSC_REFGENE_NAME               | p-value<br>(Type) | p-value (T vs.<br>N) | Ratio (T<br>vs. N) | Fold-<br>Change (T<br>vs. N) | Fold-Change (T vs.<br>N) (Description) | F(Type) | SS (Type) | SS (Error) | F (Error) |
|-------------|---------------------------------|-------------------|----------------------|--------------------|------------------------------|----------------------------------------|---------|-----------|------------|-----------|
| cg09505918  | FAM71A                          | 0.00013441        | 0.00013441           | 0.221675           | -4.51111                     | T down vs N                            | 24.868  | 21.2581   | 13.6775    | 1         |
| cg09506473  | PSKH2                           | 8.52E-05          | 8.52E-05             | 8.06332            | 8.06332                      | T up vs N                              | 27.188  | 40.8077   | 24.0153    | 1         |
| cg09507184  | ISG20L2;C1orf66;C1orf66         | 5.89E-05          | 5.89E-05             | 0.245148           | -4.07916                     | T down vs N                            | 29.164  | 18.5125   | 10.1563    | 1         |
| cg09508275  | ORH3                            | 8.68E-05          | 8.68E-05             | 0.280297           | -3.56764                     | T down vs N                            | 27.091  | 15.152    | 8.94868    | 1         |
| cg09508356  | CLPTM1L                         | 3.73E-05          | 3.73E-05             | 0.175329           | -5.70356                     | T down vs N                            | 31.74   | 28.3926   | 14.3127    | 1         |
| cg09509183  | IRF6                            | 0.00093431        | 0.000934312          | 11.6723            | 11.6723                      | T up vs N                              | 16.381  | 56.552    | 55.2368    | 1         |
| cg09510036  | DGAT2L6                         | 1.87E-06          | 1.87E-06             | 0.297934           | -3.35645                     | T down vs N                            | 52.866  | 13.733    | 4.15632    | 1         |
| cg09511177  | C1orf150                        | 0.00020911        | 0.000209105          | 0.294991           | -3.38994                     | T down vs N                            | 22.744  | 13.9591   | 9.81989    | 1         |
| cg09515098  | GFI1;GFI1;GFI1                  | 5.23E-05          | 5.23E-05             | 0.192118           | -5.20512                     | T down vs N                            | 29.818  | 25.4884   | 13.6767    | 1         |
| cg09515921  | HLX                             | 0.00352666        | 0.00352666           | 3.8171             | 3.8171                       | T up vs N                              | 11.68   | 16.8051   | 23.0206    | 1         |
| cg09516509  | SEMG2                           | 2.34E-05          | 2.34E-05             | 0.311242           | -3.21293                     | T down vs N                            | 34.532  | 12.7597   | 5.91213    | 1         |
| cg09519327  | ATG9B;NOS3                      | 0.001969          | 0.001969             | 6.4245             | 6.4245                       | T up vs N                              | 13.642  | 32.4073   | 38.008     | 1         |
| cg09521703  | SHISA7                          | 5.59E-06          | 5.59E-06             | 6.60019            | 6.60019                      | T up vs N                              | 44.205  | 33.3542   | 12.0725    | 1         |
| cg09522147  | KRT7                            | 9.63E-06          | 9.63E-06             | 6.62223            | 6.62223                      | T up vs N                              | 40.33   | 33.4721   | 13.2792    | 1         |
| cg09522251  | LINGO1                          | 1.80E-06          | 1.80E-06             | 0.323084           | -3.09517                     | T down vs N                            | 53.19   | 11.9563   | 3.59657    | 1         |
| cg09529871  | OR7C1                           | 0.00038101        | 0.000381012          | 0.300437           | -3.32848                     | T down vs N                            | 20.046  | 13.5439   | 10.8101    | 1         |
| cg09533063  | ALDH8A1;ALDH8A1                 | 4.44E-06          | 4.44E-06             | 0.262325           | -3.81206                     | T down vs N                            | 45.929  | 16.772    | 5.84272    | 1         |
| cg09533178  | PPP1R12C                        | 0.00022141        | 0.000221414          | 7.70184            | 7.70184                      | T up vs N                              | 22.478  | 39.034    | 27.7846    | 1         |
| cg09535960  | LOXL2                           | 0.00042284        | 0.00042284           | 0.220862           | -4.52771                     | T down vs N                            | 19.599  | 21.3619   | 17.4395    | 1         |
| cg09537620  | PAX6;PAX6;PAX6                  | 9.06E-05          | 9.06E-05             | 4.23646            | 4.23646                      | T up vs N                              | 26.868  | 19.5224   | 11.6255    | 1         |
| cg09537792  | ANKRD11                         | 0.00017556        | 0.000175562          | 3.79764            | 3.79764                      | T up vs N                              | 23.57   | 16.6771   | 11.3208    | 1         |
| cg09538031  | HEATR7B2                        | 5.49E-05          | 5.49E-05             | 0.224583           | -4.4527                      | T down vs N                            | 29.55   | 20.8919   | 11.3123    | 1         |
| cg09538452  | GDF15                           | 2.85E-05          | 2.85E-05             | 0.217033           | -4.6076                      | T down vs N                            | 33.332  | 21.8596   | 10.493     | 1         |
| cg09538676  | ATXN7L1;ATXN7L1                 | 0.0003893         | 0.000389298          | 0.296337           | -3.37453                     | T down vs N                            | 19.953  | 13.8552   | 11.1101    | 1         |
| cg09542291  | SMCP                            | 0.00100152        | 0.00100152           | 0.319445           | -3.13043                     | T down vs N                            | 16.114  | 12.1972   | 12.1107    | 1         |
| cg09545918  | COL8A1;MIR548G;COL8A1           | 0.0009454         | 0.000945403          | 0.314656           | -3.17807                     | T down vs N                            | 16.336  | 12.5223   | 12.2651    | 1         |
| cg09547025  | GPR126;GPR126;GPR126;GPR126     | 0.00200139        | 0.00200139           | 0.3272             | -3.05623                     | T down vs N                            | 13.585  | 11.6899   | 13.7677    | 1         |
| cg09548718  | XYLT1                           | 0.00024576        | 0.000245759          | 0.262667           | -3.8071                      | T down vs N                            | 21.998  | 16.7394   | 12.1754    | 1         |
| cg09549949  | HDAC4                           | 0.00054099        | 0.000540987          | 5.55247            | 5.55247                      | T up vs N                              | 18.563  | 27.5237   | 23.7232    | 1         |
| cg09550024  | CYP2C9                          | 1.55E-06          | 1.55E-06             | 0.121448           | -8.23395                     | T down vs N                            | 54.47   | 41.6306   | 12.2285    | 1         |
| cg09550293  | SF3A3                           | 0.00015395        | 0.000153953          | 0.203641           | -4.9106                      | T down vs N                            | 24.203  | 23.7202   | 15.681     | 1         |
| cg09550809  | BHMT                            | 3.14E-05          | 3.14E-05             | 5.64776            | 5.64776                      | T up vs N                              | 32.754  | 28.0728   | 13.7134    | 1         |
| cg09550909  | TRANK1                          | 3.16E-05          | 3.16E-05             | 0.078386           | -12.7574                     | T down vs N                            | 32.728  | 60.718    | 29.6839    | 1         |
| cg09551472  | POM121L2                        | 0.00180606        | 0.00180606           | 3.26581            | 3.26581                      | T up vs N                              | 13.946  | 13.1191   | 15.0511    | 1         |
| cg09551916  | CFHR2                           | 0.00104351        | 0.00104351           | 0.290176           | -3.44619                     | T down vs N                            | 15.958  | 14.338    | 14.3759    | 1         |
| cg09552123  | SMCP                            | 0.0007335         | 0.000733495          | 0.204899           | -4.88045                     | T down vs N                            | 17.329  | 23.537    | 21.7325    | 1         |
| cg09552510  | MPEG1                           | 0.00060496        | 0.000604955          | 0.180525           | -5.53939                     | T down vs N                            | 18.104  | 27.448    | 24.2577    | 1         |
| cg09552641  | LILRB4;LILRB4                   | 0.00022737        | 0.000227371          | 0.268201           | -3.72855                     | T down vs N                            | 22.355  | 16.2213   | 11.6099    | 1         |
| cg09552652  | SCNN1G                          | 0.00105243        | 0.00105243           | 0.243378           | -4.10884                     | T down vs N                            | 15.926  | 18.7039   | 18.7913    | 1         |
| cg09554339  | PSG7                            | 0.00025721        | 0.000257212          | 0.309814           | -3.22774                     | T down vs N                            | 21.79   | 12.8604   | 9.44331    | 1         |
| cg09554406  | TRPM4                           | 0.00015948        | 0.000159477          | 4.14236            | 4.14236                      | T up vs N                              | 24.032  | 18.9196   | 12.5963    | 1         |
| cg09554443  | CD247;CD247;CD247;CD247         | 1.65E-05          | 1.65E-05             | 0.260099           | -3.84469                     | T down vs N                            | 36.741  | 16.9863   | 7.39719    | 1         |
| cg09554952  | OR1G1                           | 0.00018427        | 0.000184271          | 0.28095            | -3.55935                     | T down vs N                            | 23.34   | 15.0966   | 10.3492    | 1         |
| cg09555617  | LETM1                           | 6.86E-05          | 6.86E-05             | 0.325821           | -3.06917                     | T down vs N                            | 28.338  | 11.7785   | 6.65018    | 1         |
| cg09555818  | APOC2;APOC2                     | 0.00128639        | 0.00128639           | 0.311137           | -3.21402                     | T down vs N                            | 15.174  | 12.7671   | 13.4625    | 1         |
| cg09557313  | LECT1;LECT1                     | 1.55E-05          | 1.55E-05             | 20.5293            | 20.5293                      | T up vs N                              | 37.149  | 85.5281   | 36.8364    | 1         |
| cg09557387  | CR1L                            | 0.00114853        | 0.00114853           | 0.15313            | -6.53041                     | T down vs N                            | 33.673  | 14.6576   | 2.61177    | 1         |
| cg09557462  | ADRA1A;ADRA1A;ADRA1A;ADRA1A     | 0.0004168         | 0.000416802          | 7.72509            | 7.72509                      | T up vs N                              | 19.66   | 39.1494   | 31.861     | 1         |
| cg09559196  | TIGD6                           | 0.00301902        | 0.00301902           | 0.306538           | -3.26224                     | T down vs N                            | 12.189  | 13.0949   | 17.1897    | 1         |
| cg09560096  | BCS1L;BCS1L                     | 0.00015377        | 0.000153771          | 0.281297           | -3.55496                     | T down vs N                            | 24.209  | 15.0673   | 9.95836    | 1         |
| cg09562426  | FOLR1;FOLR1;FOLR1;FOLR1         | 0.00048243        | 0.00048243           | 0.323387           | -3.09227                     | T down vs N                            | 19.041  | 11.9365   | 10.0304    | 1         |
| cg09563851  | KRT27                           | 5.17E-07          | 5.17E-07             | 0.123855           | -8.07394                     | T down vs N                            | 64.704  | 40.8592   | 10.1036    | 1         |
| cg09563893  | GULP1                           | 0.00178983        | 0.00178983           | 0.268353           | -3.72644                     | T down vs N                            | 13.978  | 16.2074   | 18.5517    | 1         |
| cg09565404  | FER                             | 0.00291837        | 0.00291837           | 0.33064            | -3.02443                     | T down vs N                            | 12.301  | 11.472    | 14.9218    | 1         |
| cg09567642  | BDP1                            | 0.0010258         | 0.0010258            | 3.30319            | 3.30319                      | T up vs N                              | 18.519  | 10.4009   | 6.73968    | 1         |
| cg09567674  | PKD2L2                          | 0.00124334        | 0.00124334           | 5.08545            | 5.08545                      | T up vs N                              | 15.3    | 24.7746   | 25.9086    | 1         |
| cg09567823  | STRADB                          | 6.60E-05          | 6.60E-05             | 0.268441           | -3.72522                     | T down vs N                            | 28.547  | 16.1993   | 9.07949    | 1         |
| cg09568216  | NPR3                            | 0.00036606        | 0.000366056          | 0.253334           | -3.94736                     | T down vs N                            | 20.22   | 17.6577   | 13.9724    | 1         |
| cg09573371  | RXFP2;RXFP2                     | 3.40E-05          | 3.40E-05             | 0.194127           | -5.15128                     | T down vs N                            | 32.288  | 25.168    | 12.4718    | 1         |
| cg09577324  | OR10A2                          | 0.00055714        | 0.000557135          | 0.259688           | -3.85078                     | T down vs N                            | 18.442  | 17.0263   | 14.7719    | 1         |
| cg09577367  | IL12RB1;IL12RB1                 | 5.50E-08          | 5.50E-08             | 0.168286           | -5.94226                     | T down vs N                            | 90.442  | 29.7454   | 5.26226    | 1         |
| cg09578643  | HLA-DPB2                        | 4.30E-05          | 4.30E-05             | 0.288711           | -3.46368                     | T down vs N                            | 30.922  | 14.4556   | 7.4799     | 1         |
| cg09579933  | C1orf38;C1orf38;C1orf38         | 0.00014697        | 0.000146968          | 0.315668           | -3.16789                     | T down vs N                            | 24.429  | 12.4529   | 8.15614    | 1         |
| cg09581644  | FCER1A                          | 0.00022764        | 0.000227644          | 0.323025           | -3.09573                     | T down vs N                            | 22.35   | 11.9602   | 8.56224    | 1         |
| cg09584521  | CD58;CD58;CD58                  | 3.43E-06          | 3.43E-06             | 0.272145           | -3.67451                     | T down vs N                            | 47.935  | 15.8634   | 5.29502    | 1         |
| cg09584711  | HPR                             | 2.45E-07          | 2.45E-07             | 0.269416           | -3.71173                     | T down vs N                            | 72.473  | 16.1101   | 3.55663    | 1         |
| cg09586459  | BCL2L10                         | 5.55E-05          | 5.55E-05             | 10.05              | 10.05                        | T up vs N                              | 29.497  | 49.8736   | 27.0531    | 1         |
| cg09588284  | ACRV1;ACRV1;ACRV1;ACRV1;ACRV1;A | 0.00162302        | 0.00162302           | 0.303403           | -3.29594                     | T down vs N                            | 14.327  | 13.3235   | 14.8795    | 1         |
| cg09588492  | ZKSCAN2                         | 0.00051199        | 0.000511987          | 0.212424           | -4.70758                     | T down vs N                            | 19.402  | 21.1559   | 16.356     | 1         |
| cg09591524  | HoxA3;HoxA3;HoxA3               | 2.24E-05          | 2.24E-05             | 11.6899            | 11.6899                      | T up vs N                              | 34.808  | 56.6213   | 26.0266    | 1         |

| Probeset ID                                                                                     | UCSC_REFGENE_NAME    | p-value<br>(Type) | p-value (T vs.<br>N) | Ratio (T<br>vs. N) | Fold-<br>Change (T<br>vs. N) | Fold-Change (T vs.<br>N) (Description) | F(Type) | SS (Type) | SS (Error) | F (Error) |
|-------------------------------------------------------------------------------------------------|----------------------|-------------------|----------------------|--------------------|------------------------------|----------------------------------------|---------|-----------|------------|-----------|
| cg09591867                                                                                      | AATK                 | 0.00071378        | 0.000713784          | 9.68492            | 9.68492                      | T up vs N                              | 17.437  | 48.2871   | 44.3078    | 1         |
| cg09592546                                                                                      | RPTOR;RPTOR          | 2.54E-05          | 2.54E-05             | 0.252865           | -3.95468                     | T down vs N                            | 34.042  | 17.7053   | 8.32172    | 1         |
| cg09592958                                                                                      | DEFB129              | 0.00064053        | 0.000640534          | 0.242581           | -4.12234                     | T down vs N                            | 17.872  | 18.7908   | 16.8225    | 1         |
| cg09595050                                                                                      | PRDM8                | 6.39E-06          | 6.39E-06             | 11.8874            | 11.8874                      | T up vs N                              | 43.231  | 57.3959   | 21.2424    | 1         |
| cg09595479                                                                                      | PRPH                 | 8.21E-06          | 8.21E-06             | 10.7081            | 10.7081                      | T up vs N                              | 41.441  | 52.6532   | 20.329     | 1         |
| cg09596173                                                                                      | GALK1                | 0.00026943        | 0.000269428          | 3.58308            | 3.58308                      | T up vs N                              | 21.579  | 15.2551   | 11.3109    | 1         |
| cg09596958                                                                                      | AGAP2;AGAP2          | 0.00180441        | 0.00180441           | 3.16858            | 3.16858                      | T up vs N                              | 13.949  | 12.4576   | 14.2889    | 1         |
| cg09597022                                                                                      | DAXX;DAXX;DAXX;DAXX  | 0.00027261        | 0.000272613          | 0.094819           | -10.5465                     | T down vs N                            | 21.526  | 51.9798   | 38.6357    | 1         |
| cg09599130                                                                                      | PSD                  | 0.00110622        | 0.00110622           | 4.32639            | 4.32639                      | T up vs N                              | 15.737  | 20.0946   | 20.4304    | 1         |
| cg09600520                                                                                      | CDYL                 | 1.23E-05          | 1.23E-05             | 0.240591           | -4.15643                     | T down vs N                            | 38.69   | 19.01     | 7.86143    | 1         |
| cg09601514                                                                                      | MARCO                | 9.53E-07          | 9.53E-07             | 0.199712           | -5.00721                     | T down vs N                            | 58.836  | 24.3045   | 6.60948    | 1         |
| cg09603710                                                                                      | WDR90                | 0.00232527        | 0.00232527           | 0.29664            | -3.37109                     | T down vs N                            | 13.067  | 13.832    | 16.9368    | 1         |
| cg09606564                                                                                      | MFAP4                | 0.00028312        | 0.000283124          | 0.308981           | -3.23645                     | T down vs N                            | 21.356  | 12.9196   | 9.67955    | 1         |
| cg09606832                                                                                      | TFAP2A;TFAP2A;TFAP2A | 6.89E-06          | 6.89E-06             | 0.227538           | -4.39488                     | T down vs N                            | 42.685  | 20.5278   | 7.69471    | 1         |
| cg09607679                                                                                      | PRR15L               | 9.87E-05          | 9.87E-05             | 0.323872           | -3.08764                     | T down vs N                            | 26.423  | 11.9048   | 7.20874    | 1         |
| cg09616715                                                                                      | KRT81                | 3.15E-06          | 3.15E-06             | 0.210236           | -4.75657                     | T down vs N                            | 48.593  | 22.7796   | 7.50063    | 1         |
| cg09618778                                                                                      | RHOD                 | 5.14E-06          | 5.14E-06             | 3.82098            | 3.82098                      | T up vs N                              | 44.831  | 16.8306   | 6.0068     | 1         |
| cg09619146                                                                                      | CPXM2                | 5.52E-05          | 5.52E-05             | 4.68881            | 4.68881                      | T up vs N                              | 29.52   | 22.3625   | 12.1205    | 1         |
| cg09619309                                                                                      | TPD52;TPD52          | 0.0040884         | 0.0040884            | 0.262974           | -3.80266                     | T down vs N                            | 11.206  | 16.7102   | 23.8587    | 1         |
| cg09619390                                                                                      | OSR1                 | 0.00086475        | 0.000864754          | 3.27959            | 3.27959                      | T up vs N                              | 16.681  | 13.2126   | 12.6735    | 1         |
| cg09620718                                                                                      | ACSM1                | 0.00037896        | 0.000378955          | 0.24508            | -4.08029                     | T down vs N                            | 20.07   | 18.5198   | 14.7644    | 1         |
| cg09620840                                                                                      | HLA-E                | 0.00106184        | 0.00106184           | 3.5888             | 3.5888                       | T up vs N                              | 15.892  | 15.2933   | 15.3974    | 1         |
| cg09623773                                                                                      | HTR5A                | 0.00016389        | 0.000163889          | 0.274535           | -3.64252                     | T down vs N                            | 23.9    | 15.651    | 10.4775    | 1         |
| cg09626894                                                                                      | CFTR                 | 0.00019563        | 0.000195628          | 19.9898            | 19.9898                      | T up vs N                              | 23.057  | 84.0273   | 58.3098    | 1         |
| cg09628707                                                                                      | KCNS1                | 9.62E-06          | 9.62E-06             | 3.57101            | 3.57101                      | T up vs N                              | 40.333  | 15.1745   | 6.01974    | 1         |
| cg09632136                                                                                      | NNMT                 | 3.37E-05          | 3.37E-05             | 0.143706           | -6.95863                     | T down vs N                            | 32.345  | 35.2498   | 17.4371    | 1         |
| cg09632273                                                                                      | DDAH2                | 0.00027154        | 0.000271538          | 5.92242            | 5.92242                      | T up vs N                              | 21.544  | 29.6339   | 22.0081    | 1         |
| cg09635036                                                                                      | VAT1L                | 1.06E-06          | 1.06E-06             | 0.286949           | -3.48494                     | T down vs N                            | 57.902  | 14.5984   | 4.03397    | 1         |
| cg09636163                                                                                      | ACOXL;ACOXL;ACOXL    | 0.00019378        | 0.000193784          | 0.220828           | -4.52841                     | T down vs N                            | 23.101  | 21.3663   | 14.7983    | 1         |
| cg09636661                                                                                      | NQO1;NQO1;NQO1       | 0.00021855        | 0.000218554          | 0.24027            | -4.16199                     | T down vs N                            | 22.538  | 19.0457   | 13.5205    | 1         |
| cg09636715                                                                                      | HOXA10               | 0.00097842        | 0.000978423          | 0.189781           | -5.26925                     | T down vs N                            | 16.204  | 25.8681   | 25.543     | 1         |
| cg09637757                                                                                      | RIMS2;RIMS2;RIMS2    | 0.00032779        | 0.000327794          | 0.300974           | -3.32254                     | T down vs N                            | 20.704  | 13.5037   | 10.4359    | 1         |
| cg09637885                                                                                      | DDX4;DDX4;DDX4       | 9.59E-05          | 9.59E-05             | 0.279616           | -3.57633                     | T down vs N                            | 26.571  | 15.21     | 9.15877    | 1         |
| cg09638704                                                                                      | OR2W5                | 1.53E-05          | 1.53E-05             | 0.216239           | -4.62451                     | T down vs N                            | 37.232  | 21.9645   | 9.439      | 1         |
| cg09639133                                                                                      | DPYSL3               | 0.00015054        | 0.000150535          | 0.23469            | -4.26094                     | T down vs N                            | 24.312  | 19.6785   | 12.9506    | 1         |
| PCDHGA4;PCDHGA11;PCDHGA11;PCD<br>HGA9;PCDHGA1;PCDHGB1;PCDHGB6;<br>PCDHGA12;PCDHGB3;PCDHGB7;PCDH |                      |                   |                      |                    |                              |                                        |         |           |            |           |
| cg09639151                                                                                      | GFAP;GFAP            | 0.00023845        | 0.000238447          | 6.3211             | 6.3211                       | T up vs N                              | 22.136  | 31.8444   | 23.0173    | 1         |
| cg09639715                                                                                      | GFAP;GFAP            | 0.00021076        | 0.000210763          | 0.325261           | -3.07446                     | T down vs N                            | 22.707  | 11.8146   | 8.32479    | 1         |
| cg09639890                                                                                      | FGF12                | 4.11E-05          | 4.11E-05             | 0.327747           | -3.05113                     | T down vs N                            | 31.185  | 11.655    | 5.9797     | 1         |
| cg09640202                                                                                      | IMP4                 | 0.00119121        | 0.00119121           | 0.303554           | -3.2943                      | T down vs N                            | 15.459  | 13.3124   | 13.7781    | 1         |
| cg09641576                                                                                      | SLC29A4;SLC29A4      | 1.72E-05          | 1.72E-05             | 0.304696           | -3.28196                     | T down vs N                            | 36.461  | 13.2287   | 5.80502    | 1         |
| cg09642951                                                                                      | EPHA1;EPHA1          | 0.00323156        | 0.00323156           | 5.18984            | 5.18984                      | T up vs N                              | 11.965  | 25.3975   | 33.9633    | 1         |
| cg09643312                                                                                      | CD302                | 0.00053827        | 0.000538269          | 0.285618           | -3.50118                     | T down vs N                            | 18.584  | 14.7073   | 12.6623    | 1         |
| cg09644722                                                                                      | MARCH10;MARCH10      | 0.00660635        | 0.00660635           | 4.34157            | 4.34157                      | T up vs N                              | 9.7304  | 20.1908   | 33.2003    | 1         |
| cg09646026                                                                                      | AIMP1;AIMP1;AIMP1    | 0.00038053        | 0.000380529          | 0.200684           | -4.98295                     | T down vs N                            | 20.052  | 24.1582   | 19.2767    | 1         |
| cg09646946                                                                                      | AGAP1;AGAP1          | 0.00058916        | 0.000589163          | 0.220562           | -4.53386                     | T down vs N                            | 18.212  | 21.4003   | 18.8008    | 1         |
| cg09646983                                                                                      | ESR1;ESR1            | 0.00034007        | 0.000340072          | 0.190553           | -5.24788                     | T down vs N                            | 20.542  | 25.7418   | 20.0504    | 1         |
| cg09647110                                                                                      | C2orf34              | 1.43E-05          | 1.43E-05             | 0.276837           | -3.61223                     | T down vs N                            | 37.654  | 15.4494   | 6.56473    | 1         |
| cg09653641                                                                                      | CDK6;CDK6            | 4.48E-06          | 4.48E-06             | 0.267305           | -3.74105                     | T down vs N                            | 45.864  | 16.3039   | 5.68772    | 1         |
| cg09655520                                                                                      | PRK6                 | 1.15E-05          | 1.15E-05             | 0.247576           | -4.03916                     | T down vs N                            | 39.126  | 18.2539   | 7.4646     | 1         |
| cg09656389                                                                                      | PAX6                 | 1.82E-05          | 1.82E-05             | 12.0599            | 12.0599                      | T up vs N                              | 36.111  | 58.0658   | 25.7279    | 1         |
| cg09657963                                                                                      | HEPACAM              | 0.00040054        | 0.000400542          | 10.736             | 10.736                       | T up vs N                              | 19.831  | 52.7689   | 42.5755    | 1         |
| cg09660970                                                                                      | C8orf84              | 0.001106          | 0.001106             | 3.70008            | 3.70008                      | T up vs N                              | 15.738  | 16.0329   | 16.3001    | 1         |
| cg09662616                                                                                      | CHRM3                | 0.00041561        | 0.000415605          | 0.245017           | -4.08135                     | T down vs N                            | 19.672  | 18.5266   | 15.0681    | 1         |
| CD1E;CD1E;CD1E;CD1E;CD1E;CD1E                                                                   |                      |                   |                      |                    |                              |                                        |         |           |            |           |
| cg09664215                                                                                      | SYNJ2                | 7.59E-05          | 7.59E-05             | 0.161781           | -6.18121                     | T down vs N                            | 27.8    | 31.0761   | 17.8856    | 1         |
| cg09667606                                                                                      | SYNJ2                | 6.32E-06          | 6.32E-06             | 0.163632           | -6.11126                     | T down vs N                            | 43.308  | 30.689    | 11.3379    | 1         |
| cg09667650                                                                                      | LRRCS5               | 1.00E-06          | 1.00E-06             | 0.199399           | -5.01507                     | T down vs N                            | 58.355  | 24.3519   | 6.67686    | 1         |
| cg09669354                                                                                      | LOC146336            | 8.60E-05          | 8.60E-05             | 3.86771            | 3.86771                      | T up vs N                              | 27.14   | 17.1372   | 10.1029    | 1         |
| cg09670128                                                                                      | KRT7;KRT7            | 6.13E-06          | 6.13E-06             | 114.157            | 114.157                      | T up vs N                              | 43.536  | 210.22    | 77.2587    | 1         |
| cg09670925                                                                                      | CADM1;CADM1          | 5.43E-05          | 5.43E-05             | 0.227982           | -4.38632                     | T down vs N                            | 29.613  | 20.4738   | 11.0621    | 1         |
| cg09675196                                                                                      | C11orf20             | 5.46E-05          | 5.46E-05             | 17.8922            | 17.8922                      | T up vs N                              | 29.584  | 77.9223   | 42.1431    | 1         |
| cg09675853                                                                                      | TRAF3IP1;TRAF3IP1    | 0.00013481        | 0.000134814          | 0.148205           | -6.74742                     | T down vs N                            | 24.853  | 34.1387   | 21.978     | 1         |
| cg09676484                                                                                      | NME1;NME1-NME2;NME1  | 8.17E-07          | 8.17E-07             | 0.097612           | -10.2446                     | T down vs N                            | 60.263  | 50.7063   | 13.4626    | 1         |
| cg09680007                                                                                      | S100A3               | 2.62E-06          | 2.62E-06             | 0.234329           | -4.2675                      | T down vs N                            | 50.074  | 19.7203   | 6.30117    | 1         |
| cg09680055                                                                                      | CRYBB2               | 8.69E-05          | 8.69E-05             | 0.299491           | -3.33899                     | T down vs N                            | 27.084  | 13.615    | 8.04322    | 1         |
| cg09681043                                                                                      | MYO7B                | 3.92E-06          | 3.92E-06             | 0.270157           | -3.70155                     | T down vs N                            | 46.891  | 16.0426   | 5.47405    | 1         |
| cg09684557                                                                                      | OR6C68               | 2.90E-07          | 2.90E-07             | 0.187037           | -5.34654                     | T down vs N                            | 70.681  | 26.3234   | 5.95885    | 1         |
| cg09685763                                                                                      | C20orf160            | 0.00050316        | 0.000503158          | 0.274529           | -3.6426                      | T down vs N                            | 18.865  | 15.6515   | 13.2749    | 1         |
| cg09686308                                                                                      | CIB3                 | 3.68E-06          | 3.68E-06             | 0.245021           | -4.08128                     | T down vs N                            | 47.375  | 18.5262   | 6.25684    | 1         |

| Probeset ID | UCSC_REFGENE_NAME                                             | p-value<br>(Type) | p-value (T vs.<br>N) | Ratio (T<br>vs. N) | Fold-<br>Change (T<br>vs. N) | Fold-Change (T vs.<br>N) (Description) | F(Type) | SS (Type) | SS (Error) | F (Error) |
|-------------|---------------------------------------------------------------|-------------------|----------------------|--------------------|------------------------------|----------------------------------------|---------|-----------|------------|-----------|
| cg09686672  | LRP1                                                          | 3.57E-06          | 3.57E-06             | 3.92924            | 3.92924                      | T up vs N                              | 47.612  | 17.5395   | 5.89417    | 1         |
| cg09689317  | MRC2                                                          | 0.00138122        | 0.00138122           | 0.331466           | -3.0169                      | T down vs N                            | 14.912  | 11.4204   | 12.2538    | 1         |
| cg09690597  | LHPP;LHPP                                                     | 0.0008077         | 0.000807701          | 0.327447           | -3.05393                     | T down vs N                            | 16.948  | 11.6741   | 11.0214    | 1         |
| cg09692492  | ZDHHC8P                                                       | 0.00028051        | 0.000280508          | 5.7612             | 5.7612                       | T up vs N                              | 21.398  | 28.7215   | 21.4765    | 1         |
| cg09694986  | SNTB1                                                         | 3.75E-06          | 3.75E-06             | 0.177952           | -5.61948                     | T down vs N                            | 47.235  | 27.9102   | 9.45405    | 1         |
| cg09696120  | ZAP70                                                         | 0.00427908        | 0.00427908           | 0.332642           | -3.00623                     | T down vs N                            | 11.062  | 11.3472   | 16.4129    | 1         |
| cg09702010  | KLK11;KLK11;KLK11                                             | 2.49E-06          | 2.49E-06             | 0.193719           | -5.1621                      | T down vs N                            | 50.482  | 25.2325   | 7.99736    | 1         |
| cg09703123  | NRM                                                           | 0.00013019        | 0.00013019           | 0.330281           | -3.02772                     | T down vs N                            | 25.026  | 11.4946   | 7.34895    | 1         |
| cg09704422  | ZFAT                                                          | 0.00043119        | 0.000431186          | 0.275393           | -3.63117                     | T down vs N                            | 19.515  | 15.5755   | 12.7699    | 1         |
| cg09704885  | PLAG1;PLAG1;PLAG1                                             | 4.91E-05          | 4.91E-05             | 0.205864           | -4.85758                     | T down vs N                            | 30.177  | 23.3977   | 12.4057    | 1         |
| cg09705667  | CHEK1;CHEK1;CHEK1                                             | 2.06E-05          | 2.06E-05             | 0.332034           | -3.01174                     | T down vs N                            | 35.318  | 11.385    | 5.15765    | 1         |
| cg09712066  | PART1;PART1;PDE4D;PART1                                       | 8.89E-05          | 8.89E-05             | 0.253063           | -3.95158                     | T down vs N                            | 26.965  | 17.6851   | 10.4936    | 1         |
| cg09712683  | MAL;MAL;MAL;MAL                                               | 3.41E-05          | 3.41E-05             | 11.1119            | 11.1119                      | T up vs N                              | 32.263  | 54.3101   | 26.9341    | 1         |
| cg09715353  | TMEM37                                                        | 8.03E-06          | 8.03E-06             | 5.69898            | 5.69898                      | T up vs N                              | 41.594  | 28.3663   | 10.9118    | 1         |
| cg09718708  | TEC                                                           | 0.00449255        | 0.00449255           | 3.87854            | 3.87854                      | T up vs N                              | 10.909  | 17.2082   | 25.2398    | 1         |
| cg09718987  | TACR1                                                         | 7.00E-06          | 7.00E-06             | 0.106532           | -9.38688                     | T down vs N                            | 42.571  | 46.9668   | 17.652     | 1         |
| cg09719217  | PRRT4                                                         | 0.00261379        | 0.00261379           | 3.51398            | 3.51398                      | T up vs N                              | 12.976  | 13.9229   | 16.0947    | 1         |
| cg09729155  | MGC2889;HRASLS                                                | 3.62E-07          | 3.62E-07             | 0.1981             | -5.04795                     | T down vs N                            | 68.311  | 24.5497   | 5.75014    | 1         |
| cg09729172  | POTEF                                                         | 0.00014024        | 0.000140235          | 0.284815           | -3.51106                     | T down vs N                            | 24.659  | 14.7735   | 9.5859     | 1         |
| cg09729182  | CASR                                                          | 4.03E-07          | 4.03E-07             | 0.198551           | -5.03649                     | T down vs N                            | 67.218  | 24.4808   | 5.82724    | 1         |
| cg09731079  | TMEM208                                                       | 2.61E-05          | 2.61E-05             | 0.248257           | -4.02808                     | T down vs N                            | 33.859  | 18.1821   | 8.5919     | 1         |
| cg09731113  | MYOCD;MYOCD                                                   | 0.00037196        | 0.000371962          | 0.32974            | -3.03269                     | T down vs N                            | 20.151  | 11.5286   | 9.15401    | 1         |
| cg09731211  | ATP11A;ATP11A                                                 | 0.00447795        | 0.00447795           | 0.299683           | -3.33686                     | T down vs N                            | 10.919  | 13.6006   | 19.9297    | 1         |
| cg09737019  | ZNF354A                                                       | 0.00026543        | 0.000265425          | 0.267089           | -3.74407                     | T down vs N                            | 21.647  | 16.3239   | 12.0655    | 1         |
| cg09737314  | ALOX12                                                        | 5.07E-05          | 5.07E-05             | 5.64958            | 5.64958                      | T up vs N                              | 30      | 28.0832   | 14.9776    | 1         |
| cg09738064  | ZNF185                                                        | 0.00014776        | 0.000147764          | 0.275078           | -3.63534                     | T down vs N                            | 24.403  | 15.6032   | 10.2305    | 1         |
| cg09741995  | SNRNP35;SNRNP35;SNRNP35<br>C20orf71;C20orf71;C20orf71;C20orf7 | 0.00081292        | 0.000812919          | 0.286123           | -3.495                       | T down vs N                            | 16.922  | 14.6659   | 13.8666    | 1         |
| cg09742177  | 1                                                             | 9.35E-07          | 9.35E-07             | 0.310797           | -3.21753                     | T down vs N                            | 59.007  | 12.791    | 3.46832    | 1         |
| cg09745307  | AGXT2                                                         | 2.26E-06          | 2.26E-06             | 0.298466           | -3.35046                     | T down vs N                            | 51.281  | 13.6926   | 4.2722     | 1         |
| cg09745430  | BACH2;BACH2                                                   | 0.00138988        | 0.00138988           | 0.260508           | -3.83866                     | T down vs N                            | 14.889  | 16.9467   | 18.2115    | 1         |
| cg09745688  | PRSS22                                                        | 0.00117925        | 0.00117925           | 0.330749           | -3.02344                     | T down vs N                            | 15.497  | 11.4652   | 11.8374    | 1         |
| cg09746391  | CCDC144C                                                      | 2.81E-05          | 2.81E-05             | 3.26944            | 3.26944                      | T up vs N                              | 33.418  | 13.1437   | 6.29308    | 1         |
| cg09749669  | SOX6;SOX6;SOX6;SOX6                                           | 5.28E-06          | 5.28E-06             | 0.207827           | -4.8117                      | T down vs N                            | 44.636  | 23.1176   | 8.28658    | 1         |
| cg09750643  | HCCA2;KRTAP5-6                                                | 0.00021394        | 0.000213941          | 0.327714           | -3.05144                     | T down vs N                            | 22.638  | 11.6571   | 8.23908    | 1         |
| cg09750775  | ERAP2;ERAP2;ERAP2;ERAP2                                       | 1.67E-05          | 1.67E-05             | 0.212783           | -4.69962                     | T down vs N                            | 36.652  | 22.4291   | 9.79126    | 1         |
| cg09751515  | HBD                                                           | 0.00017166        | 0.000171659          | 0.199391           | -5.01528                     | T down vs N                            | 23.678  | 24.3531   | 16.4564    | 1         |
| cg09752271  | PATE3;PATE3                                                   | 0.0004551         | 0.000455102          | 0.176073           | -5.67948                     | T down vs N                            | 19.286  | 28.2547   | 23.4403    | 1         |
| cg09754272  | C1orf61                                                       | 0.00055019        | 0.000550188          | 0.155889           | -6.41481                     | T down vs N                            | 18.494  | 32.3547   | 27.9922    | 1         |
| cg09755666  | IFIH1                                                         | 0.00473497        | 0.00473497           | 0.309495           | -3.23107                     | T down vs N                            | 10.744  | 12.8831   | 19.1848    | 1         |
| cg09759588  | SMTNL1                                                        | 0.0014592         | 0.0014592            | 0.288204           | -3.46976                     | T down vs N                            | 14.711  | 14.4965   | 15.7664    | 1         |
| cg09761690  | ZFH3;ZFH3                                                     | 0.00417291        | 0.00417291           | 0.290498           | -3.44237                     | T down vs N                            | 11.385  | 13.4704   | 17.7472    | 1         |
| cg09764601  | SSX7                                                          | 2.94E-06          | 2.94E-06             | 0.315077           | -3.17383                     | T down vs N                            | 49.157  | 12.4934   | 4.06648    | 1         |
| cg09765014  | CCDC154                                                       | 0.00035331        | 0.000353305          | 0.184157           | -5.43015                     | T down vs N                            | 20.375  | 26.813    | 21.0561    | 1         |
| cg09765463  | JAK1                                                          | 0.00012109        | 0.000121089          | 0.292652           | -3.41703                     | T down vs N                            | 25.387  | 14.1417   | 8.91277    | 1         |
| cg09766379  | PDE4DIP                                                       | 0.00473653        | 0.00473653           | 3.21561            | 3.21561                      | T up vs N                              | 10.743  | 12.7779   | 19.0301    | 1         |
| cg09766710  | OR2G3                                                         | 0.00030855        | 0.000308552          | 0.273539           | -3.65579                     | T down vs N                            | 20.971  | 15.7391   | 12.0081    | 1         |
| cg09767076  | ATP6V0A2                                                      | 0.00082785        | 0.00082785           | 0.15809            | -6.32551                     | T down vs N                            | 16.851  | 31.8685   | 30.2592    | 1         |
| cg09771226  | TBKBP1                                                        | 4.81E-07          | 4.81E-07             | 14.3378            | 14.3378                      | T up vs N                              | 65.426  | 66.4159   | 16.2421    | 1         |
| cg09772831  | ZNF844                                                        | 1.15E-05          | 1.15E-05             | 0.283189           | -3.53121                     | T down vs N                            | 39.119  | 14.9085   | 6.09763    | 1         |
| cg09773127  | DNAH17                                                        | 6.31E-06          | 6.31E-06             | 0.258711           | -3.86532                     | T down vs N                            | 43.324  | 17.1216   | 6.32325    | 1         |
| cg09773499  | FCER2                                                         | 3.68E-05          | 3.68E-05             | 0.282952           | -3.53416                     | T down vs N                            | 31.819  | 14.9282   | 7.50652    | 1         |
| cg09773769  | GPC4                                                          | 0.00015172        | 0.000151717          | 0.303502           | -3.29487                     | T down vs N                            | 24.274  | 13.3162   | 8.77734    | 1         |
| cg09774179  | CDKN1A;CDKN1A                                                 | 0.00654147        | 0.00654147           | 0.287684           | -3.47604                     | T down vs N                            | 9.7598  | 14.5386   | 23.8343    | 1         |
| cg09774842  | OXT                                                           | 3.44E-05          | 3.44E-05             | 12.5496            | 12.5496                      | T up vs N                              | 32.219  | 59.937    | 29.7648    | 1         |
| cg09776772  | MAD1L1;MAD1L1;MAD1L1                                          | 0.00596094        | 0.00596094           | 0.323154           | -3.0945                      | T down vs N                            | 10.039  | 11.9518   | 19.0494    | 1         |
| cg09777237  | ELN;ELN;ELN;ELN;ELN                                           | 0.00072917        | 0.000729171          | 0.32824            | -3.04655                     | T down vs N                            | 17.352  | 11.6236   | 10.7179    | 1         |
| cg09777775  | AGPAT3                                                        | 0.000999          | 0.000999001          | 0.242668           | -4.12085                     | T down vs N                            | 16.124  | 18.7813   | 18.6368    | 1         |
| cg09781936  | TBX1;TBX1;TBX1                                                | 0.00025362        | 0.000253616          | 0.225307           | -4.43839                     | T down vs N                            | 21.854  | 20.8019   | 15.2299    | 1         |
| cg09784307  | RPP25                                                         | 0.00385839        | 0.00385839           | 7.20785            | 7.20785                      | T up vs N                              | 11.391  | 36.5402   | 51.3267    | 1         |
| cg09785033  | TSPAN32                                                       | 0.00039941        | 0.000399411          | 0.288611           | -3.46487                     | T down vs N                            | 19.843  | 14.4636   | 11.6625    | 1         |
| cg09785991  | CLCA1                                                         | 6.10E-05          | 6.10E-05             | 0.257253           | -3.88722                     | T down vs N                            | 28.97   | 17.265    | 9.53551    | 1         |
| cg09786013  | C1orf115                                                      | 0.0057935         | 0.0057935            | 3.55607            | 3.55607                      | T up vs N                              | 10.125  | 15.0747   | 23.8225    | 1         |
| cg09789474  | BHLHB9;BHLHB9;BHLHB9;BHLHB9;BH                                | 0.00143262        | 0.00143262           | 0.272252           | -3.67307                     | T down vs N                            | 14.778  | 15.8538   | 17.1646    | 1         |
| cg09789768  | TBX15                                                         | 0.00346996        | 0.00346996           | 0.31747            | -3.1499                      | T down vs N                            | 11.733  | 12.3302   | 16.815     | 1         |
| cg09791440  | PAX7;PAX7;PAX7                                                | 0.00233727        | 0.00233727           | 0.319573           | -3.12918                     | T down vs N                            | 13.049  | 12.1887   | 14.9448    | 1         |
| cg09792881  | DMRTA2                                                        | 0.00358795        | 0.00358795           | 0.216379           | -4.62151                     | T down vs N                            | 11.624  | 21.9459   | 30.207     | 1         |
| cg09793988  | LPCAT2;LPCAT2                                                 | 0.00022825        | 0.000228251          | 15.8642            | 15.8642                      | T up vs N                              | 22.337  | 71.5581   | 51.2563    | 1         |
| cg09795081  | RPS10                                                         | 0.00142657        | 0.00142657           | 0.322523           | -3.10055                     | T down vs N                            | 15.196  | 11.2877   | 11.1423    | 1         |
| cg09796029  | MIR519C                                                       | 0.0013623         | 0.0013623            | 0.324172           | -3.08478                     | T down vs N                            | 14.962  | 11.8853   | 12.7096    | 1         |
| cg09796544  | DUSP9                                                         | 7.79E-05          | 7.79E-05             | 3.13238            | 3.13238                      | T up vs N                              | 27.658  | 12.2106   | 7.06387    | 1         |

| Probeset ID | UCSC_REFGENE_NAME                   | p-value<br>(Type) | p-value (T vs.<br>N) | Ratio (T<br>vs. N) | Fold-<br>Change (T<br>vs. N) | Fold-Change (T vs.<br>N) (Description) | F(Type) | SS (Type) | SS (Error) | F (Error) |
|-------------|-------------------------------------|-------------------|----------------------|--------------------|------------------------------|----------------------------------------|---------|-----------|------------|-----------|
| cg09799983  | CYP1B1                              | 0.00406056        | 0.00406056           | 17.4104            | 17.4104                      | T up vs N                              | 11.228  | 76.4543   | 108.95     | 1         |
| cg09802066  | MGC45800                            | 0.00012181        | 0.000121812          | 10.3593            | 10.3593                      | T up vs N                              | 25.357  | 51.1927   | 32.3018    | 1         |
| cg09802627  | HIST3H3                             | 0.00259807        | 0.00259807           | 0.274247           | -3.64635                     | T down vs N                            | 12.69   | 15.6764   | 19.7653    | 1         |
| cg09802835  | PHOX2A                              | 7.09E-06          | 7.09E-06             | 24.3181            | 24.3181                      | T up vs N                              | 42.482  | 95.3839   | 35.9243    | 1         |
| cg09804380  | PDPN1;PDPN;PDPN;PDPN                | 0.00249389        | 0.00249389           | 34.1553            | 34.1553                      | T up vs N                              | 12.828  | 116.772   | 145.641    | 1         |
| cg09804964  | TPSD1                               | 0.00013157        | 0.000131565          | 0.137867           | -7.25338                     | T down vs N                            | 24.974  | 36.7735   | 23.5599    | 1         |
| cg09805271  | MMP26                               | 1.45E-05          | 1.45E-05             | 0.206633           | -4.83949                     | T down vs N                            | 37.593  | 23.2874   | 9.9115     | 1         |
| cg09805403  | GSPT11;GSPT1;GSPT1                  | 0.00053471        | 0.000534709          | 0.21023            | -4.75668                     | T down vs N                            | 18.612  | 22.7804   | 19.5839    | 1         |
| cg09813090  | KRT27                               | 5.97E-06          | 5.97E-06             | 0.176927           | -5.65205                     | T down vs N                            | 43.729  | 28.0974   | 10.2806    | 1         |
| cg09816018  | TRIM31                              | 2.46E-05          | 2.46E-05             | 0.270234           | -3.70049                     | T down vs N                            | 35.922  | 15.0924   | 6.30215    | 1         |
| cg09821214  | FAM50B                              | 0.0007424         | 0.000742401          | 3.42252            | 3.42252                      | T up vs N                              | 17.281  | 14.1788   | 13.1281    | 1         |
| cg09822302  | C1orf183                            | 0.00046247        | 0.000462472          | 0.25153            | -3.97566                     | T down vs N                            | 19.218  | 17.8419   | 14.854     | 1         |
| cg09824900  | IGF1R                               | 0.00020365        | 0.000203652          | 0.297764           | -3.35836                     | T down vs N                            | 22.868  | 13.746    | 9.61765    | 1         |
| cg09826001  | ITGA2B                              | 1.93E-05          | 1.93E-05             | 0.216605           | -4.6167                      | T down vs N                            | 35.746  | 21.9161   | 8.90957    | 1         |
| cg09828634  | KRTAP19-2                           | 0.00123626        | 0.00123626           | 0.29889            | -3.34571                     | T down vs N                            | 15.321  | 13.6605   | 14.266     | 1         |
| cg09829164  | RADIL                               | 0.00547739        | 0.00547739           | 0.25786            | -3.87808                     | T down vs N                            | 10.295  | 17.2051   | 26.7385    | 1         |
| cg09829382  | BRUNOL5                             | 0.00022314        | 0.00022314           | 4.00301            | 4.00301                      | T up vs N                              | 22.442  | 18.0195   | 12.847     | 1         |
| cg09829983  | RSAD2                               | 0.00035519        | 0.000355194          | 0.258602           | -3.86695                     | T down vs N                            | 20.351  | 17.1323   | 13.4693    | 1         |
| cg09830308  | MLKL;MLKL                           | 0.0016134         | 0.0016134            | 0.316319           | -3.16137                     | T down vs N                            | 14.348  | 12.4084   | 13.8369    | 1         |
| cg09831562  | SOX2OT                              | 0.0010719         | 0.0010719            | 0.189965           | -5.26412                     | T down vs N                            | 16.31   | 24.3179   | 22.3647    | 1         |
| cg09831620  | OR5H2                               | 7.04E-05          | 7.04E-05             | 0.194828           | -5.13273                     | T down vs N                            | 28.196  | 25.0574   | 14.2187    | 1         |
| cg09832244  | LPAR5;LPAR5                         | 5.29E-05          | 5.29E-05             | 4.47928            | 4.47928                      | T up vs N                              | 29.762  | 21.0588   | 11.3211    | 1         |
| cg09833400  | SPINK5;SPINK5                       | 0.00019109        | 0.000191086          | 0.234483           | -4.26469                     | T down vs N                            | 23.168  | 19.7024   | 13.6069    | 1         |
| cg09837037  | SLC6A19                             | 0.00226036        | 0.00226036           | 0.277752           | -3.05109                     | T down vs N                            | 13.164  | 11.6547   | 14.1655    | 1         |
|             |                                     |                   |                      |                    |                              |                                        |         |           |            |           |
| cg09838262  | IKZF3;IKZF3;IKZF3;IKZF3;IKZF3;IKZF3 | 6.42E-05          | 6.42E-05             | 0.159133           | -6.28404                     | T down vs N                            | 28.696  | 31.6416   | 17.6422    | 1         |
| cg09838701  | CD86;CD86                           | 0.00127736        | 0.00127736           | 0.26128            | -3.82731                     | T down vs N                            | 15.2    | 16.8722   | 17.7607    | 1         |
| cg09841150  | TRIM40                              | 0.00167368        | 0.00167368           | 0.258148           | -3.87374                     | T down vs N                            | 14.217  | 17.1768   | 19.3312    | 1         |
| cg09842118  | RNASE3                              | 0.00043369        | 0.000433685          | 0.273064           | -3.66215                     | T down vs N                            | 19.491  | 15.7814   | 12.955     | 1         |
| cg09845883  | UBAP2L;UBAP2L                       | 0.0030068         | 0.0030068            | 0.300748           | -3.32505                     | T down vs N                            | 12.202  | 13.5206   | 17.7291    | 1         |
| cg09846084  | DMRTA2                              | 3.87E-05          | 3.87E-05             | 0.223519           | -4.4738                      |                                        |         |           |            |           |

| Probeset ID                                                                             | UCSC_REFGENE_NAME            | p-value<br>(Type) | p-value (T vs.<br>N) | Ratio (T<br>vs. N) | Fold-<br>Change (T<br>vs. N) | Fold-Change (T vs.<br>N) (Description) | F(Type) | SS (Type) | SS (Error) | F (Error) |
|-----------------------------------------------------------------------------------------|------------------------------|-------------------|----------------------|--------------------|------------------------------|----------------------------------------|---------|-----------|------------|-----------|
| cg09890687                                                                              | MAP7D1                       | 1.51E-05          | 1.51E-05             | 7.49604            | 7.49604                      | T up vs N                              | 37.3    | 38.0051   | 16.3023    | 1         |
| cg09893871                                                                              | PRR18                        | 0.00023481        | 0.00023481           | 13.3785            | 13.3785                      | T up vs N                              | 22.207  | 63.0062   | 45.3962    | 1         |
| cg09895590                                                                              | VAX1                         | 0.00089091        | 0.000890914          | 0.254441           | -3.93018                     | T down vs N                            | 16.565  | 17.5456   | 16.9473    | 1         |
| cg09896346                                                                              | TCEA3;TCEA3                  | 0.00028708        | 0.000287078          | 8.48852            | 8.48852                      | T up vs N                              | 21.294  | 42.8417   | 32.1915    | 1         |
| cg09899173                                                                              | MIR596                       | 0.00306716        | 0.00306716           | 3.26236            | 3.26236                      | T up vs N                              | 12.136  | 13.0957   | 17.2647    | 1         |
| cg09900436                                                                              | C20orf197                    | 4.21E-05          | 4.21E-05             | 0.272506           | -3.66964                     | T down vs N                            | 31.041  | 15.8311   | 8.16012    | 1         |
| cg09901035                                                                              | PLEKHG4B                     | 2.76E-05          | 2.76E-05             | 0.149189           | -6.70291                     | T down vs N                            | 33.53   | 33.9024   | 16.1777    | 1         |
| cg09902062                                                                              | SPRR4                        | 0.00019899        | 0.000198986          | 0.167042           | -5.98651                     | T down vs N                            | 22.977  | 29.9937   | 20.8863    | 1         |
| cg09902229                                                                              | CTS;CTS                      | 0.00371712        | 0.00371712           | 14.5095            | 14.5095                      | T up vs N                              | 11.51   | 67.0107   | 93.149     | 1         |
| cg09903849                                                                              | NOTCH4                       | 1.86E-05          | 1.86E-05             | 0.223134           | -4.48162                     | T down vs N                            | 35.986  | 21.0734   | 9.36966    | 1         |
| cg09903879                                                                              | EMP1                         | 8.64E-07          | 8.64E-07             | 0.249247           | -4.01208                     | T down vs N                            | 59.739  | 18.0784   | 4.84193    | 1         |
| cg09904296                                                                              | LOGA3                        | 0.00033303        | 0.00033303           | 0.238988           | -4.18431                     | T down vs N                            | 20.634  | 19.1888   | 14.8796    | 1         |
| cg09904358                                                                              | KIAA1217                     | 3.71E-06          | 3.71E-06             | 0.129968           | -7.69417                     | T down vs N                            | 47.311  | 38.9959   | 13.1881    | 1         |
| cg09905416                                                                              | MS4A2;MS4A2                  | 8.58E-07          | 8.58E-07             | 0.160693           | -6.22305                     | T down vs N                            | 59.807  | 31.3067   | 8.37546    | 1         |
| cg09909381                                                                              | MUC5B                        | 0.00050979        | 0.000509786          | 0.292807           | -3.41522                     | T down vs N                            | 18.81   | 14.1296   | 12.0189    | 1         |
| cg09909417                                                                              | VIPR2                        | 0.00011107        | 0.00011107           | 0.132496           | -7.54741                     | T down vs N                            | 26.876  | 36.0125   | 20.0996    | 1         |
| cg09910674                                                                              | CBFA2T3                      | 0.00227503        | 0.00227503           | 0.290518           | -3.44212                     | T down vs N                            | 13.142  | 14.3107   | 17.4232    | 1         |
| cg09911881                                                                              | TNXB                         | 0.00093883        | 0.00093883           | 0.268939           | -3.71832                     | T down vs N                            | 16.362  | 16.1536   | 15.7959    | 1         |
| cg09913813                                                                              | KIRREL3;KIRREL3              | 8.37E-05          | 8.37E-05             | 0.256418           | -3.89988                     | T down vs N                            | 27.28   | 17.3477   | 10.1746    | 1         |
| cg09914480                                                                              | SAA2;SAA2                    | 0.00015314        | 0.000153137          | 0.327997           | -3.04881                     | T down vs N                            | 24.229  | 11.6399   | 7.68616    | 1         |
| cg09914773                                                                              | CYP3A4                       | 0.00077338        | 0.000773377          | 0.200312           | -4.99222                     | T down vs N                            | 17.638  | 22.7898   | 19.3819    | 1         |
| cg09915601                                                                              | EPS8L1;EPS8L1                | 1.29E-06          | 1.29E-06             | 0.274303           | -3.6456                      | T down vs N                            | 56.065  | 15.6714   | 4.47234    | 1         |
| cg09916212                                                                              | KCNQ1;KCNQ1                  | 0.00645613        | 0.00645613           | 0.27221            | -3.67364                     | T down vs N                            | 9.799   | 15.8576   | 25.8927    | 1         |
| cg09916783                                                                              | POMC;POMC                    | 0.00310396        | 0.00310396           | 0.231512           | -3.1103                      | T down vs N                            | 12.097  | 10.0598   | 15.9507    | 1         |
| cg09917223                                                                              | ITGB2;ITGB2                  | 0.0001091         | 0.000109102          | 0.287014           | -3.48415                     | T down vs N                            | 25.912  | 14.5931   | 9.01071    | 1         |
| cg09923107                                                                              | ID1;ID1;ID1                  | 0.00629657        | 0.00629657           | 0.329662           | -3.03341                     | T down vs N                            | 10.579  | 9.22684   | 11.3379    | 1         |
| cg09923978                                                                              | ORSB12                       | 0.00115654        | 0.00115654           | 0.249359           | -4.01029                     | T down vs N                            | 15.57   | 18.0668   | 18.566     | 1         |
| cg09926260                                                                              | MIR515-2;MIR515-1            | 5.05E-05          | 5.05E-05             | 0.264303           | -3.78353                     | T down vs N                            | 30.015  | 16.5842   | 8.84062    | 1         |
| cg09928888                                                                              | CECR1;CECR1                  | 4.25E-06          | 4.25E-06             | 0.223253           | -4.47923                     | T down vs N                            | 46.265  | 21.0584   | 7.28265    | 1         |
| cg09929238                                                                              | RPTOR;RPTOR                  | 0.00052526        | 0.000525258          | 0.183347           | -5.45415                     | T down vs N                            | 18.686  | 26.9529   | 23.0792    | 1         |
| cg09930615                                                                              | ETV7                         | 0.00019914        | 0.000199141          | 10.1828            | 10.1828                      | T up vs N                              | 22.973  | 50.443    | 35.132     | 1         |
| cg09932135                                                                              | MAD2L2;C1orf187              | 1.10E-05          | 1.10E-05             | 0.299325           | -3.34085                     | T down vs N                            | 39.402  | 13.6276   | 5.53383    | 1         |
| cg09933323                                                                              | CENPF                        | 0.00075288        | 0.000752881          | 0.332941           | -3.00353                     | T down vs N                            | 17.225  | 11.3287   | 10.5231    | 1         |
| cg09935994                                                                              | ARL4C                        | 0.00027553        | 0.00027553           | 3.49762            | 3.49762                      | T up vs N                              | 21.478  | 14.6834   | 10.9383    | 1         |
| PCDHA6;PCDHA2;PCDHA1;PCDHA9;PCDHA7;PCDHA1;PCDHA6;PCDHA5;PCDHA10;PCDHA3;PCDHA4;PCDHA10;P |                              |                   |                      |                    |                              |                                        |         |           |            |           |
| cg09936799                                                                              | HA10;PCDHA3;PCDHA4;PCDHA10;P | 0.00282467        | 0.00282467           | 3.0146             | 3.0146                       | T up vs N                              | 12.41   | 11.4046   | 14.7042    | 1         |
| cg09936839                                                                              | SIRT6;ANKRD24                | 0.00330455        | 0.00330455           | 0.286077           | -3.49556                     | T down vs N                            | 11.892  | 14.6696   | 19.7377    | 1         |
| cg09938213                                                                              | RBPMS;RBPMS;RBPMS;RBPMS      | 0.00020888        | 0.000208881          | 0.287233           | -3.4815                      | T down vs N                            | 22.749  | 14.5753   | 10.2511    | 1         |
| cg09939079                                                                              | YEATS4                       | 0.00023745        | 0.00023745           | 0.300574           | -3.32697                     | T down vs N                            | 22.155  | 13.5337   | 9.77369    | 1         |
| cg09946870                                                                              | DENND3                       | 0.00146629        | 0.00146629           | 0.331637           | -3.01535                     | T down vs N                            | 14.694  | 11.4097   | 12.4242    | 1         |
| cg09947274                                                                              | C2orf28;C2orf28;CAD;C2orf28  | 0.00036825        | 0.000368249          | 0.193522           | -5.16737                     | T down vs N                            | 20.194  | 25.2639   | 20.0169    | 1         |
| cg09947844                                                                              | ADCY9                        | 2.26E-05          | 2.26E-05             | 0.277149           | -3.60817                     | T down vs N                            | 34.757  | 15.4224   | 7.09962    | 1         |
| cg09949775                                                                              | COMP;COMP                    | 0.00311792        | 0.00311792           | 0.30723            | -3.25489                     | T down vs N                            | 12.364  | 12.2776   | 14.8953    | 1         |
| cg09949906                                                                              | HLA-DRB1                     | 0.00265764        | 0.00265764           | 3.93805            | 3.93805                      | T up vs N                              | 12.614  | 17.5969   | 22.321     | 1         |
| cg09952002                                                                              | HOXB3                        | 0.00408791        | 0.00408791           | 4.01277            | 4.01277                      | T up vs N                              | 11.206  | 18.0828   | 25.8178    | 1         |
| ARHGAP8;ARHGAP8;PRR5-ARHGAP8                                                            |                              |                   |                      |                    |                              |                                        |         |           |            |           |
| cg09954385                                                                              | ADH7;ADH7                    | 6.41E-06          | 6.41E-06             | 0.328278           | -3.0462                      | T down vs N                            | 43.21   | 11.6212   | 4.30315    | 1         |
| cg09955886                                                                              | ITIH5;ITIH5                  | 1.70E-05          | 1.70E-05             | 0.245011           | -4.08144                     | T down vs N                            | 36.551  | 18.5272   | 8.11019    | 1         |
| cg09958560                                                                              | VTI1A                        | 4.73E-05          | 4.73E-05             | 0.184001           | -5.43476                     | T down vs N                            | 30.384  | 26.8399   | 14.1337    | 1         |
| cg09959931                                                                              | MYL5                         | 7.13E-05          | 7.13E-05             | 0.168475           | -5.93561                     | T down vs N                            | 28.132  | 29.7081   | 16.8964    | 1         |
| cg09961550                                                                              | SLC7A5P2                     | 0.0032365         | 0.0032365            | 4.20248            | 4.20248                      | T up vs N                              | 11.96   | 19.3052   | 25.827     | 1         |
| cg09962952                                                                              | SH2D3A                       | 8.07E-05          | 8.07E-05             | 3.47412            | 3.47412                      | T up vs N                              | 27.472  | 14.5257   | 8.45987    | 1         |
| cg09966204                                                                              | MYO16                        | 0.00017618        | 0.000176182          | 3.70943            | 3.70943                      | T up vs N                              | 23.553  | 16.0948   | 10.9334    | 1         |
| cg09966455                                                                              | COL20A1                      | 0.00394248        | 0.00394248           | 0.292439           | -3.41952                     | T down vs N                            | 11.322  | 14.1585   | 20.009     | 1         |
| cg09966920                                                                              | COL21A1                      | 0.00024028        | 0.00024028           | 0.332809           | -3.00473                     | T down vs N                            | 22.101  | 11.3369   | 8.20741    | 1         |
| cg09967877                                                                              | SYT12                        | 0.00635441        | 0.00635441           | 5.85996            | 5.85996                      | T up vs N                              | 11.819  | 18.9789   | 16.0583    | 1         |
| cg09968702                                                                              | UPK1A                        | 4.60E-05          | 4.60E-05             | 0.25134            | -3.97868                     | T down vs N                            | 30.544  | 17.8615   | 9.35661    | 1         |
| cg09968723                                                                              | BAI1                         | 3.60E-05          | 3.60E-05             | 11.7835            | 11.7835                      | T up vs N                              | 31.95   | 56.9894   | 28.5396    | 1         |
| cg09970481                                                                              | CD79A;CD79A                  | 3.41E-06          | 3.41E-06             | 0.112936           | -8.85459                     | T down vs N                            | 50.947  | 41.9294   | 12.3451    | 1         |
| cg09971646                                                                              | DLK1                         | 0.00061525        | 0.000615248          | 4.24205            | 4.24205                      | T up vs N                              | 18.036  | 19.558    | 17.3506    | 1         |
| cg09975576                                                                              | TNXB                         | 4.65E-05          | 4.65E-05             | 0.232391           | -4.30309                     | T down vs N                            | 30.488  | 19.9467   | 10.4679    | 1         |
| ADAM29;ADAM29;ADAM29;ADAM29                                                             |                              |                   |                      |                    |                              |                                        |         |           |            |           |
| cg09975995                                                                              | ADAM29;ADAM29;ADAM29;ADAM29  | 0.00126379        | 0.00126379           | 0.295139           | -3.38824                     | T down vs N                            | 15.239  | 13.9477   | 14.644     | 1         |
| cg09977718                                                                              | RPTOR;RPTOR                  | 0.00027452        | 0.000274518          | 0.194393           | -5.14421                     | T down vs N                            | 21.495  | 25.1259   | 18.7029    | 1         |
| cg09978583                                                                              | WISP3;WISP3                  | 8.47E-05          | 8.47E-05             | 0.304368           | -3.28549                     | T down vs N                            | 27.218  | 13.2527   | 7.79063    | 1         |
| cg09980085                                                                              | LOC400696                    | 0.00072295        | 0.000722946          | 0.30562            | -3.27204                     | T down vs N                            | 17.386  | 13.1614   | 12.1121    | 1         |
| cg09980477                                                                              | ARSG;ARSG                    | 0.00067903        | 0.000679031          | 0.162115           | -6.16845                     | T down vs N                            | 17.637  | 31.0056   | 28.1281    | 1         |
| cg09982773                                                                              | KCP;KCP                      | 0.0003954         | 0.0003954            | 5.04075            | 5.04075                      | T up vs N                              | 19.886  | 24.5064   | 19.7172    | 1         |
| cg09983885                                                                              | TRIM21                       | 2.58E-05          | 2.58E-05             | 0.278707           | -3.588                       | T down vs N                            | 33.936  | 15.2879   | 7.20778    | 1         |

| Probeset ID | UCSC_REFGENE_NAME                                                    | p-value<br>(Type) | p-value (T vs.<br>N) | Ratio (T<br>vs. N) | Fold-<br>Change (T<br>vs. N) | Fold-Change (T vs.<br>N) (Description) | F(Type) | SS (Type) | SS (Error) | F (Error) |
|-------------|----------------------------------------------------------------------|-------------------|----------------------|--------------------|------------------------------|----------------------------------------|---------|-----------|------------|-----------|
| cg09984898  | DKKL1                                                                | 0.0009637         | 0.000963698          | 0.29587            | -3.37986                     | T down vs N                            | 16.262  | 13.8912   | 13.6675    | 1         |
| cg09985802  | LHPP;LHPP                                                            | 0.00284513        | 0.00284513           | 0.287715           | -3.47566                     | T down vs N                            | 12.386  | 14.5361   | 18.7782    | 1         |
|             | ST3GAL3;ST3GAL3;ST3GAL3;ST3GAL3;<br>ST3GAL3;ST3GAL3;ST3GAL3;ST3GAL3; |                   |                      |                    |                              |                                        |         |           |            |           |
| cg09989037  | ST3GAL3;ST3GAL3                                                      | 0.00037735        | 0.00037735           | 0.326525           | -3.06256                     | T down vs N                            | 20.088  | 11.7332   | 9.34537    | 1         |
| cg09989938  | CD19                                                                 | 2.07E-06          | 2.07E-06             | 0.304819           | -3.28063                     | T down vs N                            | 52.017  | 13.2197   | 4.06628    | 1         |
| cg09995854  | IL1F8;IL1F8                                                          | 0.0044006         | 0.0044006            | 0.332246           | -3.00982                     | T down vs N                            | 10.974  | 11.3718   | 16.5807    | 1         |
| cg09996902  | ABT1                                                                 | 0.00061841        | 0.000618411          | 0.248696           | -4.02098                     | T down vs N                            | 18.015  | 18.1361   | 16.1078    | 1         |
| cg09997530  | GC                                                                   | 0.00019898        | 0.000198981          | 0.213435           | -4.68527                     | T down vs N                            | 22.977  | 22.3406   | 15.5569    | 1         |
| cg09997676  | PHF11;PHF11                                                          | 0.00020229        | 0.000202289          | 4.70881            | 4.70881                      | T up vs N                              | 22.899  | 22.4858   | 15.711     | 1         |
| cg10002131  | BIRC8;BIRC8                                                          | 3.79E-05          | 3.79E-05             | 0.265047           | -3.77291                     | T down vs N                            | 31.654  | 16.5142   | 8.34748    | 1         |
| cg10002668  | LAMB4                                                                | 0.00198242        | 0.00198242           | 0.294466           | -3.39597                     | T down vs N                            | 13.619  | 13.9999   | 16.448     | 1         |
| cg10003032  | USP42                                                                | 0.00050596        | 0.000505958          | 4.3573             | 4.3573                       | T up vs N                              | 18.841  | 20.2904   | 17.2306    | 1         |
| cg10005230  | EMX2OS                                                               | 0.005492          | 0.005492             | 0.222287           | -4.4987                      | T down vs N                            | 10.287  | 21.1804   | 32.9426    | 1         |
| cg10005475  | EVPL                                                                 | 0.00020061        | 0.000200612          | 0.309806           | -3.22783                     | T down vs N                            | 22.939  | 12.861    | 8.97081    | 1         |
| cg10005998  | DNMBP                                                                | 2.86E-05          | 2.86E-05             | 0.312514           | -3.19986                     | T down vs N                            | 33.314  | 12.6707   | 6.08555    | 1         |
| cg10007134  | LAIR2;LAIR2                                                          | 0.00032583        | 0.00032583           | 0.283442           | -3.52805                     | T down vs N                            | 20.73   | 14.8873   | 11.4905    | 1         |
| cg10008137  | GPX6                                                                 | 0.00017599        | 0.000175993          | 0.244113           | -4.09647                     | T down vs N                            | 23.558  | 18.6242   | 12.6488    | 1         |
| cg10009056  | MTNR1A                                                               | 0.00028709        | 0.000287085          | 0.306506           | -3.26258                     | T down vs N                            | 21.293  | 13.0972   | 9.84132    | 1         |
| cg10009657  | CREB3L3                                                              | 0.00034763        | 0.000347628          | 0.280872           | -3.56034                     | T down vs N                            | 20.445  | 15.1032   | 11.8194    | 1         |
| cg10014338  | BTNL2                                                                | 0.00030513        | 0.000305127          | 0.284763           | -3.5117                      | T down vs N                            | 21.021  | 14.7778   | 11.248     | 1         |
| cg10016004  | OTUD3                                                                | 3.43E-06          | 3.43E-06             | 0.157079           | -6.36623                     | T down vs N                            | 47.929  | 32.0906   | 10.7128    | 1         |
| cg10017105  | SLC44A4                                                              | 0.00574519        | 0.00574519           | 0.300326           | -3.32972                     | T down vs N                            | 10.357  | 12.7551   | 18.473     | 1         |
| cg10018632  | CD93                                                                 | 2.81E-06          | 2.81E-06             | 0.282896           | -3.53487                     | T down vs N                            | 49.521  | 14.9329   | 4.82479    | 1         |
| cg10020325  | GMPPA;GMPPA                                                          | 1.38E-05          | 1.38E-05             | 3.74184            | 3.74184                      | T up vs N                              | 37.919  | 16.3091   | 6.8817     | 1         |
| cg10023855  | HLA-DQA2                                                             | 1.32E-06          | 1.32E-06             | 0.124412           | -8.03784                     | T down vs N                            | 55.897  | 40.684    | 11.6455    | 1         |
| cg10034990  | FAM75A6                                                              | 2.53E-06          | 2.53E-06             | 0.29881            | -3.34661                     | T down vs N                            | 50.37   | 13.6665   | 4.34121    | 1         |
| cg10038907  | POLE2                                                                | 3.02E-05          | 3.02E-05             | 0.292451           | -3.41938                     | T down vs N                            | 32.994  | 14.1576   | 6.86558    | 1         |
| cg10039590  | ERI1                                                                 | 5.76E-05          | 5.76E-05             | 0.316708           | -3.15748                     | T down vs N                            | 29.284  | 12.3819   | 6.76506    | 1         |
| cg10040142  | MIP                                                                  | 2.80E-06          | 2.80E-06             | 0.233369           | -4.28505                     | T down vs N                            | 49.538  | 19.832    | 6.40544    | 1         |
| cg10040866  | TMEM202                                                              | 1.59E-05          | 1.59E-05             | 0.196673           | -5.08458                     | T down vs N                            | 36.963  | 24.7694   | 10.7218    | 1         |
| cg10042298  | GAB2;GAB2                                                            | 2.26E-05          | 2.26E-05             | 0.200258           | -4.99355                     | T down vs N                            | 34.755  | 24.2222   | 11.151     | 1         |
| cg10044575  | CACNA1H;CACNA1H                                                      | 0.00025806        | 0.000258055          | 4.22866            | 4.22866                      | T up vs N                              | 21.775  | 19.4726   | 14.3083    | 1         |
| cg10046101  | COBL                                                                 | 6.77E-05          | 6.77E-05             | 0.282817           | -3.53585                     | T down vs N                            | 28.408  | 14.9395   | 8.4143     | 1         |
| cg10046620  | HIST1H2AI                                                            | 3.34E-05          | 3.34E-05             | 12.7406            | 12.7406                      | T up vs N                              | 32.386  | 60.655    | 29.9664    | 1         |
| cg10052164  | HCCA2                                                                | 8.16E-05          | 8.16E-05             | 0.228678           | -4.37296                     | T down vs N                            | 27.417  | 20.3894   | 11.899     | 1         |
| cg10053622  | DNAH2                                                                | 0.0001266         | 0.000126595          | 0.235353           | -4.24893                     | T down vs N                            | 25.165  | 19.6019   | 12.463     | 1         |
| cg10053779  | INPP5F;INPP5F                                                        | 6.85E-08          | 6.85E-08             | 0.216189           | -4.62558                     | T down vs N                            | 87.58   | 21.9712   | 4.01391    | 1         |
| cg10054641  | TMEM71;TMEM71                                                        | 0.00650273        | 0.00650273           | 0.33294            | -3.00354                     | T down vs N                            | 9.7775  | 11.3288   | 18.5385    | 1         |
| cg10055265  | THY1                                                                 | 0.00017853        | 0.000178533          | 0.264419           | -3.78187                     | T down vs N                            | 23.49   | 16.5732   | 11.2887    | 1         |
| cg10056482  | EEPD1                                                                | 0.00114465        | 0.00114465           | 3.85376            | 3.85376                      | T up vs N                              | 15.609  | 17.0458   | 17.4733    | 1         |
| cg10059167  | OR7E156P                                                             | 0.00313488        | 0.00313488           | 0.325282           | -3.07425                     | T down vs N                            | 12.064  | 11.8132   | 15.6669    | 1         |
| cg10064162  | LAMB1                                                                | 0.00272716        | 0.00272716           | 3.36185            | 3.36185                      | T up vs N                              | 12.527  | 13.7695   | 17.587     | 1         |
| cg10064871  | PRKCDBP                                                              | 0.00020799        | 0.000207992          | 3.41966            | 3.41966                      | T up vs N                              | 22.769  | 14.1595   | 9.94992    | 1         |
| cg10065209  | TAS1R3                                                               | 5.15E-05          | 5.15E-05             | 0.167779           | -5.96022                     | T down vs N                            | 29.906  | 29.8463   | 15.9679    | 1         |
| cg10070728  | VCX3B                                                                | 6.22E-05          | 6.22E-05             | 0.319107           | -3.13375                     | T down vs N                            | 28.863  | 12.2199   | 6.77394    | 1         |
| cg10071091  | KSR2                                                                 | 1.34E-05          | 1.34E-05             | 0.228202           | -4.38208                     | T down vs N                            | 38.106  | 20.447    | 8.58542    | 1         |
| cg10073842  | MAGEL2                                                               | 0.00042362        | 0.000423618          | 0.312782           | -3.19711                     | T down vs N                            | 19.591  | 12.652    | 10.333     | 1         |
| cg10074409  | IRF6;IRF6                                                            | 0.00023114        | 0.00023114           | 11.1644            | 11.1644                      | T up vs N                              | 22.279  | 54.523    | 39.156     | 1         |
| cg10076006  | DEFB1                                                                | 0.00049472        | 0.000494721          | 0.235663           | -4.24334                     | T down vs N                            | 18.935  | 19.5663   | 16.5333    | 1         |
| cg10076902  | SYT8                                                                 | 3.50E-05          | 3.50E-05             | 0.257336           | -3.88596                     | T down vs N                            | 32.114  | 17.2567   | 8.59783    | 1         |
| cg10081994  | LONRF2                                                               | 0.00099338        | 0.000993379          | 0.267429           | -3.73931                     | T down vs N                            | 16.146  | 16.2925   | 16.1455    | 1         |
| cg10084644  | STAG3;GPC2                                                           | 0.00282832        | 0.00282832           | 3.1131             | 3.1131                       | T up vs N                              | 12.405  | 12.0789   | 15.5791    | 1         |
| cg10087036  | ITPRIPL2;ITPRIPL2;ITPRIPL2                                           | 0.00415344        | 0.00415344           | 0.304125           | -3.28813                     | T down vs N                            | 11.156  | 13.2705   | 19.0327    | 1         |
| cg10091155  | CYSLTR1                                                              | 0.00161707        | 0.00161707           | 0.306163           | -3.26624                     | T down vs N                            | 14.34   | 13.122    | 14.641     | 1         |
| cg10092198  | OR56B4                                                               | 6.04E-07          | 6.04E-07             | 0.136553           | -7.32317                     | T down vs N                            | 63.169  | 37.1298   | 9.40465    | 1         |
| cg10094691  | DSCAM                                                                | 0.00067513        | 0.000675126          | 0.29734            | -3.36315                     | T down vs N                            | 17.66   | 13.7783   | 12.4832    | 1         |
| cg10095968  | TRPM2                                                                | 0.00153558        | 0.00153558           | 0.178373           | -5.60623                     | T down vs N                            | 14.526  | 27.8339   | 30.6578    | 1         |
| cg10096215  | DPEP2                                                                | 0.0008429         | 0.000842903          | 0.32017            | -3.12334                     | T down vs N                            | 16.781  | 12.1489   | 11.5838    | 1         |
| cg10096929  | TMEM79;TMEM79                                                        | 0.00030049        | 0.000300493          | 7.71802            | 7.71802                      | T up vs N                              | 21.089  | 39.1143   | 29.6753    | 1         |
| cg10099601  | TRIL                                                                 | 1.59E-06          | 1.59E-06             | 0.26803            | -3.73092                     | T down vs N                            | 54.29   | 16.237    | 4.78523    | 1         |
| cg10099900  | PSMF1                                                                | 0.00133703        | 0.00133703           | 0.294245           | -3.39853                     | T down vs N                            | 15.031  | 14.0171   | 14.9206    | 1         |
| cg10106284  | FAM49A                                                               | 0.00042452        | 0.000424524          | 0.315045           | -3.17415                     | T down vs N                            | 19.582  | 12.4955   | 10.21      | 1         |
| cg10107725  | LY75                                                                 | 0.00017667        | 0.000176667          | 3.99769            | 3.99769                      | T up vs N                              | 23.54   | 17.985    | 12.2242    | 1         |
| cg10109747  | CR2;CR2                                                              | 0.00026631        | 0.00026631           | 0.228694           | -4.37266                     | T down vs N                            | 21.632  | 20.3875   | 15.0796    | 1         |
| cg10110335  | SYN2;TIMP4;SYN2                                                      | 0.00070678        | 0.000706779          | 0.296303           | -3.37493                     | T down vs N                            | 17.476  | 13.8578   | 12.6872    | 1         |
| cg10111816  | CDR2                                                                 | 3.01E-06          | 3.01E-06             | 0.136754           | -7.31242                     | T down vs N                            | 48.973  | 37.075    | 12.1128    | 1         |
| cg10111831  | CCDC73                                                               | 0.00185267        | 0.00185267           | 0.270847           | -3.69212                     | T down vs N                            | 13.856  | 15.9801   | 18.4526    | 1         |
| cg10113526  | DENND3                                                               | 0.00278255        | 0.00278255           | 0.269326           | -3.71297                     | T down vs N                            | 12.46   | 16.1183   | 20.698     | 1         |
| cg10114725  | FAM124B;FAM124B                                                      | 0.00658998        | 0.00658998           | 0.319095           | -3.13386                     | T down vs N                            | 9.7378  | 12.2207   | 20.0796    | 1         |
| cg10115320  | PRDM16;PRDM16                                                        | 0.00028621        | 0.00028621           | 0.325474           | -3.07244                     | T down vs N                            | 21.307  | 11.8008   | 8.86156    | 1         |
| cg10116178  | UBQLNL                                                               | 2.49E-06          | 2.49E-06             | 0.166933           | -5.99043                     | T down vs N                            | 50.491  | 30.0156   | 9.51168    | 1         |

| Probeset ID | UCSC_REFGENE_NAME               | p-value<br>(Type) | p-value (T vs.<br>N) | Ratio (T<br>vs. N) | Fold-<br>Change (T<br>vs. N) | Fold-Change (T vs.<br>N) (Description) | F(Type) | SS (Type) | SS (Error) | F (Error) |
|-------------|---------------------------------|-------------------|----------------------|--------------------|------------------------------|----------------------------------------|---------|-----------|------------|-----------|
| cg10116443  | SLC22A9                         | 3.60E-05          | 3.60E-05             | 0.194812           | -5.13315                     | T down vs N                            | 31.946  | 25.0599   | 12.5511    | 1         |
| cg10116675  | C17orf90;CCDC137                | 4.40E-05          | 4.40E-05             | 0.179334           | -5.57619                     | T down vs N                            | 30.795  | 27.6607   | 14.3713    | 1         |
| cg10117369  | LAX1;LAX1                       | 0.000116          | 0.000115996          | 0.330299           | -3.02756                     | T down vs N                            | 25.603  | 11.4935   | 7.18267    | 1         |
| cg10119001  | SPRR2C                          | 6.91E-07          | 6.91E-07             | 0.133401           | -7.49621                     | T down vs N                            | 61.855  | 38.006    | 9.83095    | 1         |
| cg10121294  | CATSPER4                        | 0.00176352        | 0.00176352           | 0.295831           | -3.38031                     | T down vs N                            | 14.031  | 13.8942   | 15.8444    | 1         |
| cg10122267  | CTPS                            | 0.00013081        | 0.000130805          | 3.78752            | 3.78752                      | T up vs N                              | 25.002  | 16.6104   | 10.6297    | 1         |
| cg10122434  | IRF6                            | 3.71E-05          | 3.71E-05             | 0.277019           | -3.60986                     | T down vs N                            | 31.772  | 15.4336   | 7.77209    | 1         |
| cg10122690  | CEBPZ                           | 0.00356359        | 0.00356359           | 0.321613           | -3.10932                     | T down vs N                            | 11.646  | 12.0531   | 16.5588    | 1         |
| cg10122865  | OTX1                            | 0.00234168        | 0.00234168           | 0.126987           | -7.87485                     | T down vs N                            | 13.043  | 39.8881   | 48.9318    | 1         |
| cg10123201  | MYL3                            | 5.06E-05          | 5.06E-05             | 0.255634           | -3.91184                     | T down vs N                            | 30.003  | 17.4259   | 9.29303    | 1         |
| cg10125195  | LACRT                           | 6.44E-05          | 6.44E-05             | 0.330981           | -3.02132                     | T down vs N                            | 28.679  | 11.4507   | 6.38827    | 1         |
| cg10126923  | NKG7                            | 1.72E-05          | 1.72E-05             | 0.269704           | -3.70777                     | T down vs N                            | 36.469  | 16.0838   | 7.05649    | 1         |
| cg10128511  | ST3GAL6                         | 1.46E-05          | 1.46E-05             | 0.142051           | -7.03975                     | T down vs N                            | 37.544  | 35.6723   | 15.2023    | 1         |
| cg10131232  | SIRPG;SIRPG;SIRPG               | 0.00055253        | 0.000552532          | 0.252169           | -3.9656                      | T down vs N                            | 18.476  | 17.7764   | 15.3941    | 1         |
| cg10132694  | LAIR1;LAIR1                     | 0.00166811        | 0.00166811           | 0.297089           | -3.366                       | T down vs N                            | 14.229  | 13.7976   | 15.5152    | 1         |
| cg10134527  | ZBTB22;TAPBP;TAPBP;TAPBP;ZBTB22 | 0.00012285        | 0.000122851          | 3.44052            | 3.44052                      | T up vs N                              | 25.315  | 14.2999   | 9.03817    | 1         |
| cg10135708  | UCN2                            | 0.00035433        | 0.000354328          | 0.296465           | -3.37308                     | T down vs N                            | 21.063  | 13.031    | 9.28002    | 1         |
| cg10136216  | PDGFB;PDGFB                     | 6.13E-05          | 6.13E-05             | 0.291054           | -3.43579                     | T down vs N                            | 30.227  | 13.4288   | 6.66391    | 1         |
| cg10137837  | BCL6B                           | 0.00082584        | 0.000825836          | 3.18905            | 3.18905                      | T up vs N                              | 16.861  | 12.5971   | 11.9542    | 1         |
| cg10138630  | EVPL                            | 2.87E-05          | 2.87E-05             | 0.30995            | -3.22632                     | T down vs N                            | 33.297  | 12.8508   | 6.1752     | 1         |
| cg10143809  | LOC441208                       | 0.00078353        | 0.000783534          | 0.295793           | -3.38075                     | T down vs N                            | 17.067  | 13.8971   | 13.0282    | 1         |
| cg10143960  | TTL10                           | 0.00031788        | 0.000317876          | 4.92849            | 4.92849                      | T up vs N                              | 20.839  | 23.8287   | 18.2952    | 1         |
| cg10145449  | SPATC1;SPATC1                   | 0.0016339         | 0.0016339            | 0.216972           | -4.60889                     | T down vs N                            | 14.303  | 21.8676   | 24.4623    | 1         |
| cg10146929  | HIST1H1A                        | 0.00145751        | 0.00145751           | 6.30381            | 6.30381                      | T up vs N                              | 14.715  | 31.7499   | 34.5214    | 1         |
| cg10148591  | INSR;INSR                       | 0.00013251        | 0.000132509          | 0.330834           | -3.02267                     | T down vs N                            | 24.938  | 11.4599   | 7.3525     | 1         |
| cg10150530  | LRMP;LRMP                       | 0.00010401        | 0.000104011          | 0.164757           | -6.06954                     | T down vs N                            | 26.156  | 30.4571   | 18.6314    | 1         |
| cg10153214  | CHST4;CHST4                     | 2.80E-05          | 2.80E-05             | 0.324034           | -3.08609                     | T down vs N                            | 33.447  | 11.8942   | 5.68989    | 1         |
| cg10153260  | EDA2R                           | 0.00101384        | 0.00101384           | 0.271506           | -3.68316                     | T down vs N                            | 16.068  | 15.9208   | 15.8537    | 1         |
| cg10153733  | SMU1                            | 0.00013116        | 0.000131159          | 0.29295            | -3.41356                     | T down vs N                            | 24.989  | 14.1184   | 9.03975    | 1         |
| cg10159630  | HOXD3                           | 0.00106794        | 0.00106794           | 14.1275            | 14.1275                      | T up vs N                              | 15.87   | 65.6807   | 66.2182    | 1         |
| cg10161194  | EEF2;SNORD37                    | 0.00220457        | 0.00220457           | 0.307703           | -3.24989                     | T down vs N                            | 13.25   | 13.011    | 15.7114    | 1         |
| cg10162698  | PAGE5;PAGE5                     | 0.00073369        | 0.000733694          | 0.260773           | -3.83476                     | T down vs N                            | 17.327  | 16.9211   | 15.6249    | 1         |
| cg10162971  | GRHL1                           | 0.00011825        | 0.000118246          | 0.217568           | -4.59626                     | T down vs N                            | 25.506  | 21.7891   | 13.6683    | 1         |
| cg10164390  | MYO1F                           | 0.00232316        | 0.00232316           | 0.300135           | -3.33183                     | T down vs N                            | 13.07   | 13.5666   | 16.6079    | 1         |
| cg10165008  | PODNL1;PODNL1;PODNL1            | 0.00047793        | 0.000477926          | 0.186116           | -5.37299                     | T down vs N                            | 19.08   | 26.4786   | 22.2044    | 1         |
| cg10167849  | HMGA1;HMGA1;HMGA1;HMGA1;HMGA1   | 0.00305124        | 0.00305124           | 0.296715           | -3.37023                     | T down vs N                            | 12.154  | 13.8261   | 18.202     | 1         |
| cg10168894  | RAB21                           | 1.32E-05          | 1.32E-05             | 0.301371           | -3.31816                     | T down vs N                            | 38.202  | 13.4741   | 5.64327    | 1         |
| cg10170214  | LZTS2                           | 4.15E-06          | 4.15E-06             | 3.27041            | 3.27041                      | T up vs N                              | 46.443  | 13.1503   | 4.53041    | 1         |
| cg10171489  | LY86                            | 2.24E-05          | 2.24E-05             | 0.176515           | -5.66523                     | T down vs N                            | 34.818  | 28.1731   | 12.9464    | 1         |
| cg10171557  | NFS1                            | 2.32E-06          | 2.32E-06             | 0.237192           | -4.21599                     | T down vs N                            | 51.092  | 19.3916   | 6.07274    | 1         |
| cg10173124  | CYP27C1                         | 0.00018627        | 0.00018627           | 0.271136           | -3.68818                     | T down vs N                            | 23.288  | 15.9541   | 10.961     | 1         |
| cg10173186  | TIMP4;SYN2;TIMP4;SYN2           | 0.00303196        | 0.00303196           | 0.272269           | -3.67283                     | T down vs N                            | 12.175  | 15.8523   | 20.8335    | 1         |
| cg10173787  | GPR35                           | 3.34E-05          | 3.34E-05             | 0.293863           | -3.40294                     | T down vs N                            | 32.4    | 14.0469   | 6.93663    | 1         |
| cg10174063  | ZFP57                           | 0.0013583         | 0.0013583            | 0.26845            | -3.72509                     | T down vs N                            | 14.973  | 16.1985   | 17.3094    | 1         |
| cg10174170  | UNC45B;UNC45B                   | 0.00017381        | 0.000173809          | 0.196478           | -5.08964                     | T down vs N                            | 23.618  | 24.7997   | 16.8005    | 1         |
| cg10175155  | C4BPA                           | 0.00135247        | 0.00135247           | 0.318598           | -3.13876                     | T down vs N                            | 14.989  | 12.2541   | 13.0807    | 1         |
| cg10175583  | MYH9                            | 3.28E-06          | 3.28E-06             | 0.274473           | -3.64334                     | T down vs N                            | 48.279  | 15.6564   | 5.1886     | 1         |
| cg10176692  | ORA81                           | 0.00012182        | 0.000121823          | 0.301081           | -3.32137                     | T down vs N                            | 25.357  | 13.4957   | 8.51575    | 1         |
| cg10177827  | MIR487B;MIR381                  | 0.00029973        | 0.000299728          | 0.2999             | -3.33445                     | T down vs N                            | 21.101  | 13.5843   | 10.3006    | 1         |
| cg10178628  | PLVAP                           | 2.63E-05          | 2.63E-05             | 0.210012           | -4.76163                     | T down vs N                            | 35.475  | 21.4689   | 9.07771    | 1         |
| cg10184431  | HIST1H2AJ;HIST1H2BM;HIST1H2BM   | 0.0040888         | 0.0040888            | 4.05186            | 4.05186                      | T up vs N                              | 11.206  | 18.3361   | 26.1809    | 1         |
| cg10184983  | SRCIN1                          | 7.35E-05          | 7.35E-05             | 7.40632            | 7.40632                      | T up vs N                              | 27.968  | 37.5521   | 21.4826    | 1         |
| cg10186564  | SLC6A16                         | 0.00635409        | 0.00635409           | 0.303412           | -3.29585                     | T down vs N                            | 9.8466  | 13.3229   | 21.6487    | 1         |
| cg10187792  | RAB37;RAB37;RAB37;RAB37         | 3.42E-07          | 3.42E-07             | 0.191897           | -5.21113                     | T down vs N                            | 68.917  | 25.524    | 5.92577    | 1         |
| cg10188253  | TEX101                          | 2.07E-05          | 2.07E-05             | 0.262691           | -3.80675                     | T down vs N                            | 35.298  | 16.737    | 7.5866     | 1         |
| cg10188797  | TBC1D16                         | 0.00088592        | 0.000885919          | 0.206826           | -4.83497                     | T down vs N                            | 16.587  | 23.2598   | 22.4371    | 1         |
| cg10188897  | RUNDC3A;RUNDC3A;RUNDC3A         | 0.00012022        | 0.00012022           | 4.158              | 4.158                        | T up vs N                              | 25.423  | 19.0201   | 11.9703    | 1         |
| cg10189763  | MUC7;MUC7;MUC7;MUC7             | 0.00067588        | 0.000675878          | 0.322828           | -3.09762                     | T down vs N                            | 17.656  | 11.9731   | 10.8504    | 1         |
| cg10190416  | LOC400696                       | 2.01E-07          | 2.01E-07             | 0.122935           | -8.13439                     | T down vs N                            | 74.697  | 41.1515   | 8.81456    | 1         |
| cg10192641  | COPS6                           | 0.00170175        | 0.00170175           | 0.322802           | -3.09788                     | T down vs N                            | 14.158  | 11.9748   | 13.5333    | 1         |
| cg10192893  | PHOX2B                          | 0.00294588        | 0.00294588           | 15.7045            | 15.7045                      | T up vs N                              | 12.27   | 71.0351   | 92.6306    | 1         |
| cg10194573  | KPRP                            | 0.00062537        | 0.00062537           | 0.21089            | -4.74181                     | T down vs N                            | 17.969  | 22.6889   | 20.2024    | 1         |
| cg10194602  | CCDC40                          | 0.00157528        | 0.00157528           | 0.29619            | -3.37622                     | T down vs N                            | 14.434  | 13.8665   | 15.3708    | 1         |
| cg10195814  | KLRC4                           | 0.00029235        | 0.000292354          | 0.225798           | -4.42873                     | T down vs N                            | 21.212  | 20.7412   | 15.645     | 1         |
| cg10198749  | MACF1;MACF1                     | 0.00012546        | 0.000125457          | 0.307751           | -3.24939                     | T down vs N                            | 25.21   | 13.0076   | 8.25551    | 1         |
| cg10199049  | RFPL4A                          | 0.00022098        | 0.000220984          | 0.217278           | -4.60241                     | T down vs N                            | 22.487  | 21.8273   | 15.5305    | 1         |
| cg10199250  | LVRN                            | 0.00015196        | 0.000151961          | 6.00819            | 6.00819                      | T up vs N                              | 24.266  | 30.1149   | 19.8565    | 1         |
| cg10200168  | NCOR2;NCOR2                     | 0.00035238        | 0.000352383          | 5.72583            | 5.72583                      | T up vs N                              | 20.386  | 28.5198   | 22.3839    | 1         |
| cg10201533  | C1orf170                        | 2.28E-05          | 2.28E-05             | 0.224874           | -4.44694                     | T down vs N                            | 34.7    | 20.8557   | 9.61642    | 1         |

| Probeset ID | UCSC_REFGENE_NAME                                                     | p-value<br>(Type) | p-value (T vs.<br>N) | Ratio (T<br>vs. N) | Fold-<br>Change (T<br>vs. N) | Fold-Change (T vs.<br>N) (Description) | F(Type) | SS (Type) | SS (Error) | F (Error) |
|-------------|-----------------------------------------------------------------------|-------------------|----------------------|--------------------|------------------------------|----------------------------------------|---------|-----------|------------|-----------|
| cg10201923  | MFAP2;MFAP2;MFAP2;MFAP2                                               | 2.44E-07          | 2.44E-07             | 0.19517            | -5.12374                     | T down vs N                            | 72.525  | 25.0037   | 5.51619    | 1         |
| cg10202436  | SPATA24                                                               | 6.71E-05          | 6.71E-05             | 0.299803           | -3.33552                     | T down vs N                            | 28.46   | 13.5915   | 7.64094    | 1         |
| cg10202727  | PVT1                                                                  | 1.33E-06          | 1.33E-06             | 0.308833           | -3.238                       | T down vs N                            | 55.855  | 12.9302   | 3.70395    | 1         |
| cg10202821  | KANK3                                                                 | 0.00098654        | 0.00098654           | 0.323033           | -3.09566                     | T down vs N                            | 16.172  | 11.9597   | 11.8324    | 1         |
| cg10203211  | ENPP6                                                                 | 0.00142146        | 0.00142146           | 0.215638           | -4.6374                      | T down vs N                            | 14.807  | 22.0445   | 23.8211    | 1         |
| cg10203610  | LRAT                                                                  | 0.00035698        | 0.000356978          | 6.42898            | 6.42898                      | T up vs N                              | 20.329  | 32.4316   | 25.5249    | 1         |
| cg10204707  | BIRC8;BIRC8                                                           | 3.89E-07          | 3.89E-07             | 0.246713           | -4.05329                     | T down vs N                            | 67.573  | 18.3453   | 4.34385    | 1         |
| cg10204725  | NLRP4                                                                 | 0.00010892        | 0.000108916          | 0.309669           | -3.22925                     | T down vs N                            | 25.921  | 12.8707   | 7.94455    | 1         |
| cg10205430  | PROP1                                                                 | 7.08E-06          | 7.08E-06             | 0.220424           | -4.5367                      | T down vs N                            | 42.489  | 21.4181   | 8.06533    | 1         |
| cg10205431  | PCDHA6;PCDHA2;PCDHA1;PCDHA7;PCDHA1;PCDHA6;PCDHA5;PCDHA3;PCDHA4;PCDHA7 | 9.40E-05          | 9.40E-05             | 3.54986            | 3.54986                      | T up vs N                              | 26.674  | 15.0332   | 9.01754    | 1         |
|             | GPR56;GPR56;GPR56;GPR56;GPR56;GPR56;GPR56                             | 0.00112007        | 0.00112007           | 0.31962            | -3.12872                     | T down vs N                            | 15.69   | 12.1856   | 12.4263    | 1         |
|             | FAM66A                                                                | 3.15E-06          | 3.15E-06             | 0.333052           | -3.00253                     | T down vs N                            | 48.609  | 11.3219   | 3.72667    | 1         |
| cg10206774  | SEC14L5                                                               | 0.00148891        | 0.00148891           | 0.257166           | -3.88854                     | T down vs N                            | 14.638  | 17.2736   | 18.8809    | 1         |
| cg10209087  | DDX60L                                                                | 4.19E-07          | 4.19E-07             | 0.234189           | -4.27006                     | T down vs N                            | 66.811  | 19.7366   | 4.72657    | 1         |
| cg10212847  | TRPM4                                                                 | 0.00016995        | 0.000169953          | 0.294429           | -3.39641                     | T down vs N                            | 23.726  | 14.0028   | 9.44317    | 1         |
| cg10213821  | BUD31;PDAP1                                                           | 5.90E-06          | 5.90E-06             | 0.200925           | -4.97697                     | T down vs N                            | 43.818  | 24.1221   | 8.80806    | 1         |
| cg10218000  | RNF222                                                                | 3.97E-06          | 3.97E-06             | 0.116912           | -8.55344                     | T down vs N                            | 46.787  | 43.1475   | 14.7553    | 1         |
| cg10218759  | DEFB104B;DEFB104A                                                     | 9.32E-07          | 9.32E-07             | 0.180127           | -5.55165                     | T down vs N                            | 59.041  | 27.5189   | 7.45763    | 1         |
| cg10220068  | GFPT2                                                                 | 3.27E-06          | 3.27E-06             | 0.121859           | -8.20619                     | T down vs N                            | 48.294  | 41.4973   | 13.7482    | 1         |
| cg10222608  | MTOR                                                                  | 4.25E-05          | 4.25E-05             | 0.264513           | -3.78053                     | T down vs N                            | 30.988  | 16.5644   | 8.5528     | 1         |
| cg10223575  | LHX5                                                                  | 3.71E-05          | 3.71E-05             | 0.239769           | -4.17067                     | T down vs N                            | 31.784  | 19.1014   | 9.61555    | 1         |
| cg10224107  | C5AR1;C5AR1                                                           | 1.68E-05          | 1.68E-05             | 0.226839           | -4.40841                     | T down vs N                            | 36.627  | 20.6132   | 9.00449    | 1         |
| cg10226546  | NFATC2;NFATC2;NFATC2                                                  | 4.47E-05          | 4.47E-05             | 5.22775            | 5.22775                      | T up vs N                              | 30.709  | 25.6226   | 13.3497    | 1         |
| cg10227880  | CNR2                                                                  | 6.05E-05          | 6.05E-05             | 0.215861           | -4.63261                     | T down vs N                            | 29.021  | 22.0148   | 12.1373    | 1         |
| cg10230190  | MCOLN2                                                                | 9.26E-05          | 9.26E-05             | 0.22058            | -4.5335                      | T down vs N                            | 26.754  | 21.398    | 12.7968    | 1         |
| cg10230427  | BAG2                                                                  | 3.09E-05          | 3.09E-05             | 0.222053           | -4.50343                     | T down vs N                            | 32.845  | 21.21     | 10.3322    | 1         |
| cg10231067  | IFFO2                                                                 | 0.00559821        | 0.00559821           | 0.325052           | -3.07643                     | T down vs N                            | 10.229  | 11.8282   | 18.5017    | 1         |
| cg10233463  | OR4D2                                                                 | 0.00175201        | 0.00175201           | 0.294733           | -3.3929                      | T down vs N                            | 14.054  | 13.9791   | 15.9149    | 1         |
| cg10235453  | ZNF469                                                                | 0.00048979        | 0.00048979           | 3.1131             | 3.1131                       | T up vs N                              | 18.977  | 12.0789   | 10.184     | 1         |
| cg10236239  | SULT1C4;SULT1C4                                                       | 0.00034119        | 0.000341187          | 0.309946           | -3.22637                     | T down vs N                            | 20.527  | 12.8511   | 10.0168    | 1         |
| cg10236261  | IFT81;IFT81;IFT81                                                     | 1.86E-05          | 1.86E-05             | 0.103276           | -9.68278                     | T down vs N                            | 35.986  | 48.2777   | 21.465     | 1         |
| cg10239638  | FAM12A                                                                | 0.00184597        | 0.00184597           | 0.232794           | -4.29564                     | T down vs N                            | 13.869  | 19.8993   | 22.9569    | 1         |
| cg10241563  | ST6GALNAC3;ST6GALNAC3                                                 | 6.14E-06          | 6.14E-06             | 0.294145           | -3.39968                     | T down vs N                            | 43.525  | 14.0249   | 5.15557    | 1         |
| cg10242160  | ZAR1                                                                  | 0.00014611        | 0.000146108          | 4.34761            | 4.34761                      | T up vs N                              | 24.458  | 20.229    | 13.2337    | 1         |
| cg10242602  | ZFP42                                                                 | 0.00362178        | 0.00362178           | 3.97816            | 3.97816                      | T up vs N                              | 11.594  | 17.8581   | 24.6446    | 1         |
| cg10244368  | ZNF808                                                                | 0.00086729        | 0.00086729           | 6.01931            | 6.01931                      | T up vs N                              | 16.669  | 30.1771   | 28.9655    | 1         |
| cg10245048  | TNFRSF10A                                                             | 0.00232805        | 0.00232805           | 5.40258            | 5.40258                      | T up vs N                              | 13.063  | 26.6519   | 32.6446    | 1         |
| cg10246081  | C1QL4                                                                 | 1.91E-05          | 1.91E-05             | 4.62274            | 4.62274                      | T up vs N                              | 35.81   | 21.9536   | 9.80902    | 1         |
| cg10251217  | TAT                                                                   | 3.00E-06          | 3.00E-06             | 0.100061           | -9.99389                     | T down vs N                            | 48.988  | 49.6321   | 16.2105    | 1         |
| cg10251229  | PRKAR1B;PRKAR1B;PRKAR1B;PRKAR1B;PRKAR1B;PRKAR1B                       | 0.00342661        | 0.00342661           | 0.329653           | -3.03349                     | T down vs N                            | 11.773  | 11.5341   | 15.6748    | 1         |
|             | LTBP4;LTBP4;LTBP4                                                     | 0.00082643        | 0.000826431          | 0.186836           | -5.35228                     | T down vs N                            | 16.858  | 26.3572   | 25.0162    | 1         |
|             | FLJ22536                                                              | 0.00031532        | 0.000315322          | 0.246803           | -4.05182                     | T down vs N                            | 20.875  | 18.3358   | 14.0538    | 1         |
| cg10256336  | F2RL3;F2RL3                                                           | 3.95E-08          | 3.95E-08             | 0.326953           | -3.05854                     | T down vs N                            | 94.901  | 11.7057   | 1.97355    | 1         |
| cg10257471  | MLYCD                                                                 | 5.86E-05          | 5.86E-05             | 0.311038           | -3.21504                     | T down vs N                            | 29.191  | 12.7741   | 7.0016     | 1         |
| cg10260050  | C11orf60;TMEM25;TMEM25;C11orf60                                       | 0.00151663        | 0.00151663           | 0.244382           | -4.09196                     | T down vs N                            | 14.571  | 18.5951   | 20.4185    | 1         |
|             | CPXCR1                                                                | 0.00470778        | 0.00470778           | 0.274153           | -3.6476                      | T down vs N                            | 10.762  | 15.6847   | 23.3179    | 1         |
|             | SULT2B1;SULT2B1                                                       | 0.0011729         | 0.0011729            | 0.271575           | -3.68223                     | T down vs N                            | 15.517  | 15.9146   | 16.4098    | 1         |
| cg10263682  | SOX2OT                                                                | 4.00E-06          | 4.00E-06             | 5.86064            | 5.86064                      | T up vs N                              | 46.737  | 29.2855   | 10.0256    | 1         |
| cg10267867  | SEC14L5                                                               | 0.00575419        | 0.00575419           | 0.317285           | -3.15174                     | T down vs N                            | 10.145  | 12.3427   | 19.4654    | 1         |
| cg10268345  | PKD1;MIR1225;PKD1                                                     | 0.00047684        | 0.000476838          | 5.85416            | 5.85416                      | T up vs N                              | 19.09   | 29.2489   | 24.5151    | 1         |
| cg10269439  | IL1F7;IL1F7;IL1F7;IL1F7;IL1F7;IL1F7;IL1F7                             | 0.00355526        | 0.00355526           | 0.252763           | -3.95628                     | T down vs N                            | 11.654  | 17.7157   | 24.3225    | 1         |
|             | ATP6V1G2;NFKBIL1;NFKBIL1;NFKBIL1                                      | 0.0002127         | 0.000212699          | 0.21286            | -4.69793                     | T down vs N                            | 22.665  | 22.4187   | 15.8263    | 1         |
|             | C7orf10                                                               | 0.0004126         | 0.000412602          | 0.310784           | -3.21767                     | T down vs N                            | 19.703  | 12.7919   | 10.3876    | 1         |
| cg10275766  | LOC91149                                                              | 0.00339173        | 0.00339173           | 0.237773           | -4.20569                     | T down vs N                            | 11.807  | 19.3257   | 26.1895    | 1         |
| cg10276834  | CHRM2;CHRM2;CHRM2;CHRM2;CHRM2                                         | 3.85E-06          | 3.85E-06             | 0.228825           | -4.37016                     | T down vs N                            | 47.024  | 20.3717   | 6.93158    | 1         |
|             | GP52                                                                  | 2.17E-05          | 2.17E-05             | 0.256632           | -3.89663                     | T down vs N                            | 35.015  | 17.3265   | 7.91739    | 1         |
|             | PRMT3;PRMT3;PRMT3                                                     | 1.42E-06          | 1.42E-06             | 0.300033           | -3.33297                     | T down vs N                            | 55.27   | 13.5742   | 3.92958    | 1         |
| cg10279872  | COLEC10                                                               | 0.00042391        | 0.000423908          | 0.296014           | -3.37822                     | T down vs N                            | 20.244  | 13.0636   | 9.67987    | 1         |
| cg10282845  | PPTC7                                                                 | 7.86E-06          | 7.86E-06             | 0.203244           | -4.92021                     | T down vs N                            | 41.748  | 23.7785   | 9.11316    | 1         |
| cg10283844  | HPCAL1;HPCAL1                                                         | 0.00010691        | 0.00010691           | 0.276744           | -3.61344                     | T down vs N                            | 26.016  | 15.4575   | 9.50662    | 1         |
| cg10284006  | KRT76                                                                 | 9.61E-07          | 9.61E-07             | 0.324233           | -3.0842                      | T down vs N                            | 58.762  | 11.8813   | 3.23511    | 1         |
| cg10284884  | TECTA                                                                 | 8.88E-05          | 8.88E-05             | 0.235963           | -4.23796                     | T down vs N                            | 26.973  | 19.5319   | 11.5859    | 1         |
| cg10286380  | SHANK1                                                                | 4.90E-05          | 4.90E-05             | 4.80899            | 4.80899                      | T up vs N                              | 30.189  | 23.101    | 12.2432    | 1         |
| cg10287970  | RREB1;RREB1;RREB1;RREB1                                               | 4.34E-06          | 4.34E-06             | 0.245329           | -4.07617                     | T down vs N                            | 46.103  | 18.4932   | 6.41801    | 1         |

| Probeset ID | UCSC_REFGENE_NAME        | p-value<br>(Type) | p-value (T vs.<br>N) | Ratio (T<br>vs. N) | Fold-<br>Change (T<br>vs. N) | Fold-Change (T vs.<br>N) (Description) | F(Type) | SS (Type) | SS (Error) | F (Error) |
|-------------|--------------------------|-------------------|----------------------|--------------------|------------------------------|----------------------------------------|---------|-----------|------------|-----------|
| cg10289177  | ACCN3;ACCN3;ACCN3        | 0.00244164        | 0.00244164           | 3.14105            | 3.14105                      | T up vs N                              | 12.9    | 12.2698   | 15.218     | 1         |
| cg10290988  | HCCA2                    | 3.00E-06          | 3.00E-06             | 0.305014           | -3.27853                     | T down vs N                            | 48.986  | 13.2054   | 4.31319    | 1         |
| cg10292154  | IL21R;IL21R;IL21R        | 5.05E-05          | 5.05E-05             | 0.061236           | -16.3304                     | T down vs N                            | 30.014  | 73.0655   | 38.9505    | 1         |
| cg10292376  | KRT72;KRT72;KRT72        | 0.00138638        | 0.00138638           | 3.20686            | 3.20686                      | T up vs N                              | 14.898  | 12.7183   | 13.6591    | 1         |
| cg10292584  | ADARB2                   | 7.68E-09          | 7.68E-09             | 0.118848           | -8.41411                     | T down vs N                            | 119.87  | 42.4898   | 5.67169    | 1         |
| cg10296205  | SYTL3                    | 0.00011841        | 0.000118406          | 0.266444           | -3.75313                     | T down vs N                            | 25.499  | 16.3837   | 10.2803    | 1         |
| cg10296410  | MEI1                     | 0.0001737         | 0.000173701          | 6.74243            | 6.74243                      | T up vs N                              | 23.621  | 34.1122   | 23.1063    | 1         |
| cg10296914  | MAGEC3;MAGEC3            | 0.00012391        | 0.000123908          | 0.308668           | -3.23973                     | T down vs N                            | 25.272  | 12.9419   | 8.19372    | 1         |
| cg10298507  | OR52K2                   | 0.00044014        | 0.000440139          | 0.23349            | -4.28284                     | T down vs N                            | 19.428  | 19.8179   | 16.3212    | 1         |
| cg10298567  | KIF9;KIF9;KIF9           | 0.00330051        | 0.00330051           | 0.277132           | -3.60838                     | T down vs N                            | 11.896  | 15.4238   | 20.7455    | 1         |
| cg10300891  | OR4B1                    | 0.00039372        | 0.000393721          | 0.204026           | -4.90133                     | T down vs N                            | 19.905  | 23.6639   | 19.0218    | 1         |
| cg10304824  | HOXD3;HOXD3              | 0.00026441        | 0.000264405          | 5.52               | 5.52                         | T up vs N                              | 21.665  | 27.3357   | 20.1884    | 1         |
| cg10305299  | DEFB115                  | 4.18E-05          | 4.18E-05             | 0.215248           | -4.64581                     | T down vs N                            | 31.087  | 22.0966   | 11.3729    | 1         |
| cg10305311  | CLDN10;CLDN10;CLDN10     | 0.00500654        | 0.00500654           | 10.8093            | 10.8093                      | T up vs N                              | 10.794  | 49.95     | 69.4145    | 1         |
| cg10305410  | VN1R1                    | 0.00130654        | 0.00130654           | 0.325141           | -3.07558                     | T down vs N                            | 15.116  | 11.8224   | 12.5136    | 1         |
| cg10308027  | SLC20A2                  | 4.98E-05          | 4.98E-05             | 0.202994           | -4.92626                     | T down vs N                            | 30.1    | 23.8152   | 12.6592    | 1         |
| cg10308253  | ZC3H12D                  | 0.00327009        | 0.00327009           | 0.25827            | -3.87191                     | T down vs N                            | 11.926  | 17.1647   | 23.0285    | 1         |
| cg10308396  | DNAH17                   | 6.77E-06          | 6.77E-06             | 0.242549           | -4.12287                     | T down vs N                            | 42.815  | 18.7943   | 7.02345    | 1         |
| cg10308629  | BPGM;BPGM                | 0.00104516        | 0.00104516           | 0.275499           | -3.62978                     | T down vs N                            | 15.952  | 15.5662   | 15.6131    | 1         |
| cg10310595  | HLA-DMB                  | 5.02E-06          | 5.02E-06             | 0.236757           | -4.22373                     | T down vs N                            | 45.005  | 19.4411   | 6.91159    | 1         |
| cg10312334  | SGCE;SGCE;SGCE           | 0.00038559        | 0.000385586          | 0.313812           | -3.18663                     | T down vs N                            | 19.995  | 12.5806   | 10.0671    | 1         |
| cg10312447  | TMEM233                  | 0.00110505        | 0.00110505           | 0.326564           | -3.06219                     | T down vs N                            | 15.741  | 11.7307   | 11.9237    | 1         |
| cg10313673  | CILP2;CILP2              | 0.00192151        | 0.00192151           | 0.320529           | -3.11984                     | T down vs N                            | 13.728  | 12.125    | 14.1318    | 1         |
| cg10314052  | MPPED1                   | 0.00035661        | 0.000356607          | 0.183506           | -5.4494                      | T down vs N                            | 20.334  | 26.9253   | 21.1865    | 1         |
| cg10316026  | POT1;POT1;POT1;POT1;POT1 | 0.00037451        | 0.000374514          | 0.327473           | -3.05369                     | T down vs N                            | 20.121  | 11.6725   | 9.28191    | 1         |
| cg10316357  | LY9;LY9                  | 1.44E-05          | 1.44E-05             | 0.257532           | -3.88302                     | T down vs N                            | 37.604  | 17.2375   | 7.3343     | 1         |
| cg10316474  | APOBEC3C                 | 5.06E-06          | 5.06E-06             | 0.29397            | -3.4017                      | T down vs N                            | 44.956  | 14.0385   | 4.99639    | 1         |
| cg10316764  | TAOK2;TAOK2              | 0.0006201         | 0.000620096          | 3.94385            | 3.94385                      | T up vs N                              | 18.004  | 17.6348   | 15.6722    | 1         |
| cg10318359  | LOC653786                | 9.09E-07          | 9.09E-07             | 0.267056           | -3.74453                     | T down vs N                            | 59.277  | 16.3269   | 4.40693    | 1         |
| cg10319331  | TMEM132B                 | 5.31E-05          | 5.31E-05             | 0.320935           | -3.1159                      | T down vs N                            | 29.738  | 12.098    | 6.50906    | 1         |
| cg10319663  | SLC22A25                 | 3.37E-06          | 3.37E-06             | 0.153081           | -6.53248                     | T down vs N                            | 48.066  | 32.9907   | 10.9818    | 1         |
| cg10321236  | MYO7A;MYO7A;MYO7A        | 0.00069568        | 0.000695677          | 3.82402            | 3.82402                      | T up vs N                              | 17.54   | 16.8506   | 15.3714    | 1         |
| cg10321714  | FLG                      | 7.25E-05          | 7.25E-05             | 0.21936            | -4.55871                     | T down vs N                            | 28.042  | 21.5554   | 12.2991    | 1         |
| cg10322876  | CYP2B6                   | 7.07E-06          | 7.07E-06             | 0.307641           | -3.25054                     | T down vs N                            | 42.503  | 13.0154   | 4.89961    | 1         |
| cg10323841  | SRRM4                    | 0.00429469        | 0.00429469           | 0.332882           | -3.00407                     | T down vs N                            | 11.05   | 11.3324   | 16.4085    | 1         |
| cg10324224  | TTC13;TTC13;ARV1         | 0.00091769        | 0.000917691          | 0.28413            | -3.51951                     | T down vs N                            | 16.45   | 14.8302   | 14.4243    | 1         |
| cg10324998  | TGFBR3                   | 1.21E-06          | 1.21E-06             | 0.298416           | -3.35103                     | T down vs N                            | 56.634  | 13.6964   | 3.86945    | 1         |
| cg10328089  | C2orf76                  | 2.88E-05          | 2.88E-05             | 0.159178           | -6.28229                     | T down vs N                            | 33.282  | 31.6321   | 15.2068    | 1         |
| cg10333520  | TRANK1                   | 5.36E-06          | 5.36E-06             | 3.58741            | 3.58741                      | T up vs N                              | 44.515  | 15.284    | 5.49355    | 1         |
| cg10339098  | LPP;LPP;LPP              | 8.36E-05          | 8.36E-05             | 0.300879           | -3.32359                     | T down vs N                            | 27.285  | 13.5108   | 7.92277    | 1         |
| cg10342722  | SCPEP1                   | 0.00046378        | 0.000463777          | 0.299112           | -3.34323                     | T down vs N                            | 19.84   | 12.8411   | 9.70842    | 1         |
| cg10342899  | KAZALD1                  | 9.43E-07          | 9.43E-07             | 9.14719            | 9.14719                      | T up vs N                              | 58.933  | 45.8881   | 12.4584    | 1         |
| cg10343314  | TECTB                    | 0.00033057        | 0.000330571          | 0.311347           | -3.21185                     | T down vs N                            | 20.666  | 12.7524   | 9.87296    | 1         |
| cg10344698  | TRIM24;TRIM24            | 0.00031072        | 0.000310719          | 0.21081            | -4.74362                     | T down vs N                            | 20.94   | 22.7001   | 17.3446    | 1         |
| cg10345936  | SLC36A2                  | 1.11E-06          | 1.11E-06             | 0.261507           | -3.824                       | T down vs N                            | 57.405  | 16.8504   | 4.69657    | 1         |
| cg10347335  | TACSTD2;TACSTD2          | 2.38E-06          | 2.38E-06             | 12.512             | 12.512                       | T up vs N                              | 50.853  | 59.795    | 18.8136    | 1         |
| cg10348193  | LRR61;ACTR3C;LRR61       | 8.48E-05          | 8.48E-05             | 9.82908            | 9.82908                      | T up vs N                              | 27.213  | 48.9176   | 28.7617    | 1         |
| cg10352025  | LOC642006                | 0.00061149        | 0.000611491          | 0.323306           | -3.09304                     | T down vs N                            | 18.061  | 11.9418   | 10.5793    | 1         |
| cg10353108  | USP2;USP2                | 0.00623836        | 0.00623836           | 5.41167            | 5.41167                      | T up vs N                              | 9.9017  | 26.7051   | 43.1524    | 1         |
| cg10353539  | TTC12                    | 0.0001789         | 0.000178895          | 14.029             | 14.029                       | T up vs N                              | 23.48   | 65.3341   | 44.5199    | 1         |
| cg10353705  | CCDC153                  | 7.41E-06          | 7.41E-06             | 0.283503           | -3.5273                      | T down vs N                            | 42.163  | 14.8823   | 5.64759    | 1         |
| cg10354406  | MRPS35                   | 0.00225989        | 0.00225989           | 0.249918           | -4.00132                     | T down vs N                            | 13.165  | 18.0086   | 21.8871    | 1         |
| cg10356204  | JSRP1                    | 5.52E-06          | 5.52E-06             | 0.331635           | -3.01537                     | T down vs N                            | 44.306  | 11.4099   | 4.12036    | 1         |
| cg10357555  | RALYL;RALYL;RALYL;RALYL  | 0.00024677        | 0.00024677           | 0.221841           | -4.50774                     | T down vs N                            | 21.979  | 21.237    | 15.46      | 1         |
| cg10360420  | MIR512-1;MIR512-2        | 0.0002839         | 0.000283903          | 0.275604           | -3.6284                      | T down vs N                            | 21.343  | 15.557    | 11.6623    | 1         |
| cg10362294  | MIR498                   | 1.29E-05          | 1.29E-05             | 0.18913            | -5.28738                     | T down vs N                            | 38.348  | 25.9752   | 10.8376    | 1         |
| cg10362335  | TNFSF14;TNFSF14          | 0.00010005        | 0.000100051          | 0.257146           | -3.88884                     | T down vs N                            | 26.354  | 17.2755   | 10.4882    | 1         |
| cg10364459  | FUK                      | 0.00152118        | 0.00152118           | 0.265125           | -3.7718                      | T down vs N                            | 14.56   | 16.5069   | 18.139     | 1         |
| cg10365984  | BACH2;BACH2              | 0.00072078        | 0.000720781          | 0.277674           | -3.60134                     | T down vs N                            | 17.398  | 15.3769   | 14.1412    | 1         |
| cg10366797  | HOXC4                    | 0.00294073        | 0.00294073           | 5.42572            | 5.42572                      | T up vs N                              | 12.276  | 26.7871   | 34.9142    | 1         |
| cg10369955  | GALNT9                   | 0.00549752        | 0.00549752           | 0.200351           | -4.99123                     | T down vs N                            | 10.284  | 24.2082   | 37.6629    | 1         |
| cg10371155  | MED1                     | 9.29E-05          | 9.29E-05             | 0.221741           | -4.50976                     | T down vs N                            | 26.736  | 21.2497   | 12.7167    | 1         |
| cg10372121  | LOC100188949             | 1.87E-05          | 1.87E-05             | 0.216927           | -4.60985                     | T down vs N                            | 35.944  | 21.8735   | 9.73685    | 1         |
| cg10373003  | MYO15A                   | 0.0048258         | 0.0048258            | 3.61814            | 3.61814                      | T up vs N                              | 10.685  | 15.4888   | 23.1926    | 1         |
| cg10374202  | RPL14;RPL14              | 2.55E-06          | 2.55E-06             | 0.248824           | -4.0189                      | T down vs N                            | 50.296  | 18.1226   | 5.76508    | 1         |
| cg10374493  | SYT10                    | 0.00263285        | 0.00263285           | 0.328532           | -3.04385                     | T down vs N                            | 12.645  | 11.6051   | 14.6839    | 1         |
| cg10374534  | FAM20A;FAM20A            | 2.14E-06          | 2.14E-06             | 0.323041           | -3.09558                     | T down vs N                            | 51.741  | 11.9591   | 3.69814    | 1         |
| cg10375016  | ATP8B4                   | 5.78E-05          | 5.78E-05             | 0.256425           | -3.89978                     | T down vs N                            | 29.268  | 17.3471   | 9.48316    | 1         |
| cg10378325  | CLCA2                    | 5.81E-05          | 5.81E-05             | 0.198512           | -5.03747                     | T down vs N                            | 29.241  | 24.4867   | 13.3984    | 1         |
| cg10378804  | LOC284805                | 0.00021634        | 0.00021634           | 0.295101           | -3.38867                     | T down vs N                            | 22.586  | 13.9506   | 9.88275    | 1         |
| cg10380221  | ZNF668                   | 0.0006143         | 0.000614299          | 0.309212           | -3.23403                     | T down vs N                            | 18.042  | 12.9032   | 11.4429    | 1         |
| cg10380585  | TRAF5;TRAF5              | 0.00019637        | 0.000196366          | 0.12064            | -8.28912                     | T down vs N                            | 23.039  | 41.8947   | 29.0947    | 1         |

| Probeset ID | UCSC_REFGENE_NAME                                               | p-value<br>(Type) | p-value (T vs.<br>N) | Ratio (T<br>vs. N) | Fold-<br>Change (T<br>vs. N) | Fold-Change (T vs.<br>N) (Description) | F(Type) | SS (Type) | SS (Error) | F (Error) |
|-------------|-----------------------------------------------------------------|-------------------|----------------------|--------------------|------------------------------|----------------------------------------|---------|-----------|------------|-----------|
| cg10382148  | TRAF3IP3                                                        | 0.00236847        | 0.00236847           | 0.177044           | -5.6483                      | T down vs N                            | 13.004  | 28.0759   | 34.5443    | 1         |
| cg10383428  | NCAPD2                                                          | 3.92E-05          | 3.92E-05             | 0.223623           | -4.47182                     | T down vs N                            | 31.454  | 21.0119   | 10.6885    | 1         |
| cg10384919  | MEI1                                                            | 0.00087666        | 0.000876655          | 3.81149            | 3.81149                      | T up vs N                              | 16.628  | 16.7682   | 16.1354    | 1         |
| cg10385290  | SLC1A6                                                          | 0.00091826        | 0.000918255          | 0.141922           | -7.04613                     | T down vs N                            | 16.448  | 35.7054   | 34.7332    | 1         |
| cg10390696  | PSG8;PSG8;PSG8                                                  | 9.82E-06          | 9.82E-06             | 0.190408           | -5.25188                     | T down vs N                            | 40.194  | 25.7655   | 10.2564    | 1         |
| cg10398774  | GP5                                                             | 0.00010136        | 0.000101358          | 5.00271            | 5.00271                      | T up vs N                              | 26.288  | 24.2774   | 14.7764    | 1         |
| cg10399946  | RPS18                                                           | 8.67E-05          | 8.67E-05             | 0.331822           | -3.01366                     | T down vs N                            | 27.095  | 11.3982   | 6.73089    | 1         |
| cg10400652  | PNMAL2;PNMAL2                                                   | 8.03E-06          | 8.03E-06             | 9.47145            | 9.47145                      | T up vs N                              | 41.592  | 47.3438   | 18.2126    | 1         |
| cg10402103  | PRHOXNB                                                         | 0.00010027        | 0.000100271          | 0.245613           | -4.07145                     | T down vs N                            | 26.343  | 18.4627   | 11.2137    | 1         |
| cg10405729  | GLYAT;GLYAT                                                     | 2.92E-06          | 2.92E-06             | 0.153577           | -6.5114                      | T down vs N                            | 49.208  | 32.8771   | 10.69      | 1         |
| cg10406526  | ABCA7                                                           | 2.58E-06          | 2.58E-06             | 0.056492           | -17.7016                     | T down vs N                            | 50.217  | 77.3447   | 24.6433    | 1         |
| cg10412312  | IFLTD1;IFLTD1;IFLTD1;IFLTD1                                     | 0.00051722        | 0.000517217          | 0.303445           | -3.29549                     | T down vs N                            | 18.75   | 13.3205   | 11.367     | 1         |
| cg10413105  | FAM46D                                                          | 0.00612148        | 0.00612148           | 0.21788            | -4.58968                     | T down vs N                            | 9.9585  | 21.7482   | 34.9423    | 1         |
| cg10414177  | DLEU7                                                           | 0.00053534        | 0.000535343          | 0.321237           | -3.11297                     | T down vs N                            | 18.607  | 12.078    | 10.386     | 1         |
| cg10414736  | HCG11                                                           | 3.20E-05          | 3.20E-05             | 7.57779            | 7.57779                      | T up vs N                              | 32.646  | 38.4155   | 18.8278    | 1         |
| cg10414946  | MS4A2;MS4A2                                                     | 5.66E-05          | 5.66E-05             | 0.204569           | -4.88833                     | T down vs N                            | 29.384  | 23.5849   | 12.8425    | 1         |
| cg10416668  | IL21R;IL21R;IL21R                                               | 2.86E-06          | 2.86E-06             | 0.13973            | -7.15663                     | T down vs N                            | 49.378  | 36.2768   | 11.7547    | 1         |
| cg10419507  | SNORD115-6                                                      | 0.00122616        | 0.00122616           | 0.253736           | -3.94111                     | T down vs N                            | 15.351  | 17.6169   | 18.3612    | 1         |
| cg10420578  | SLC6A3                                                          | 4.05E-05          | 4.05E-05             | 0.306894           | -3.25845                     | T down vs N                            | 31.273  | 13.0692   | 6.68655    | 1         |
| cg10421435  | UBLCP1                                                          | 1.34E-05          | 1.34E-05             | 0.28404            | -3.52063                     | T down vs N                            | 38.115  | 14.8377   | 6.22856    | 1         |
| cg10423607  | CPA6;CPA6                                                       | 7.73E-05          | 7.73E-05             | 0.159607           | -6.26538                     | T down vs N                            | 27.699  | 31.5393   | 18.2183    | 1         |
| cg10424264  | FLT4;FLT4                                                       | 1.15E-06          | 1.15E-06             | 0.134918           | -7.41189                     | T down vs N                            | 57.105  | 37.5803   | 10.5294    | 1         |
| cg10424892  | DDX12                                                           | 0.00044214        | 0.000442136          | 0.369251           | -3.69251                     | T down vs N                            | 19.409  | 15.9828   | 13.1758    | 1         |
| cg10425245  | SLIT3                                                           | 4.57E-05          | 4.57E-05             | 0.323842           | -3.08792                     | T down vs N                            | 30.575  | 11.9068   | 6.23083    | 1         |
| cg10426464  | C2CD4B                                                          | 7.25E-05          | 7.25E-05             | 12.5425            | 12.5425                      | T up vs N                              | 28.042  | 59.9103   | 34.1829    | 1         |
| cg10427027  | PTPRN2;PTPRN2;PTPRN2                                            | 0.00116353        | 0.00116353           | 0.243097           | -4.11358                     | T down vs N                            | 15.547  | 18.7345   | 19.2802    | 1         |
| cg10429096  | LILRA6                                                          | 2.52E-06          | 2.52E-06             | 0.332277           | -3.00954                     | T down vs N                            | 50.41   | 11.3699   | 3.6088     | 1         |
| cg10429523  | STL                                                             | 0.00595045        | 0.00595045           | 0.319005           | -3.13475                     | T down vs N                            | 10.044  | 12.2267   | 19.4774    | 1         |
| cg10430205  | GTF2B                                                           | 4.41E-05          | 4.41E-05             | 0.227806           | -4.3897                      | T down vs N                            | 30.778  | 20.4951   | 10.6543    | 1         |
| cg10430444  | UBE2Q2;UBE2Q2                                                   | 2.64E-05          | 2.64E-05             | 0.236263           | -4.23257                     | T down vs N                            | 33.81   | 19.4975   | 9.22691    | 1         |
| cg10431747  | C1orf94;C1orf94                                                 | 0.00016953        | 0.000169533          | 5.05023            | 5.05023                      | T up vs N                              | 23.737  | 24.5634   | 16.5567    | 1         |
| cg10433327  | NEDD4;NEDD4                                                     | 0.0002038         | 0.000203797          | 0.219253           | -4.56094                     | T down vs N                            | 22.865  | 21.5693   | 15.0936    | 1         |
| cg10435486  | LOC100192378                                                    | 1.08E-06          | 1.08E-06             | 0.136784           | -7.31082                     | T down vs N                            | 57.651  | 37.0669   | 10.2873    | 1         |
| cg10435816  | PCDHGA4;PCDHGA9;PCDHGA1;PCDHG<br>B1;PCDHGB7;PCDHGB6;PCDHGB3;PCD | 0.0058231         | 0.0058231            | 5.69184            | 5.69184                      | T up vs N                              | 10.109  | 28.3255   | 44.8309    | 1         |
| cg10438564  | STATH;STATH                                                     | 2.20E-05          | 2.20E-05             | 0.289789           | -3.45079                     | T down vs N                            | 34.933  | 14.369    | 6.58134    | 1         |
| cg10439431  | CCL23;CCL23                                                     | 9.58E-05          | 9.58E-05             | 0.184369           | -5.42392                     | T down vs N                            | 26.578  | 26.7766   | 16.1196    | 1         |
| cg10439859  | RHBDD1;RHBDD1                                                   | 0.00012205        | 0.000122051          | 0.329079           | -3.03879                     | T down vs N                            | 25.347  | 11.5704   | 7.30357    | 1         |
| cg10440516  | MCART6;ZCCHC18;ZCCHC18                                          | 0.00017319        | 0.000173194          | 0.263097           | -3.80088                     | T down vs N                            | 23.635  | 16.6984   | 11.3042    | 1         |
| cg10440696  | OR52N1                                                          | 0.00011275        | 0.000112747          | 0.210586           | -4.74866                     | T down vs N                            | 25.746  | 22.7311   | 14.1264    | 1         |
| cg10443971  | NR1H3;NR1H3;NR1H3                                               | 0.00069093        | 0.000690929          | 0.312148           | -3.2036                      | T down vs N                            | 17.567  | 12.6962   | 11.5636    | 1         |
| cg10444717  | C7orf60                                                         | 4.67E-05          | 4.67E-05             | 0.315339           | -3.17119                     | T down vs N                            | 30.458  | 12.4754   | 6.55355    | 1         |
| cg10447615  | CLCC1;CLCC1                                                     | 0.00015652        | 0.00015652           | 0.240962           | -4.15003                     | T down vs N                            | 24.123  | 18.9689   | 12.5817    | 1         |
| cg10453365  | RHCG                                                            | 0.0003675         | 0.000367503          | 3.27918            | 3.27918                      | T up vs N                              | 20.203  | 13.2098   | 10.4618    | 1         |
| cg10453419  | PCSK6;PCSK6;PCSK6;PCSK6;PCSK6                                   | 0.00114348        | 0.00114348           | 0.21762            | -4.59516                     | T down vs N                            | 15.612  | 21.7823   | 22.3231    | 1         |
| cg10454258  | IL21R;IL21R;IL21R                                               | 5.26E-07          | 5.26E-07             | 0.231151           | -4.32619                     | T down vs N                            | 64.517  | 20.0933   | 4.98306    | 1         |
| cg10458494  | KNDC1                                                           | 3.64E-07          | 3.64E-07             | 3.00051            | 3.00051                      | T up vs N                              | 68.266  | 11.308    | 2.65035    | 1         |
| cg10459111  | BTRC;BTRC                                                       | 4.97E-05          | 4.97E-05             | 0.323037           | -3.09562                     | T down vs N                            | 30.102  | 11.9594   | 6.35672    | 1         |
| cg10460168  | SRP19                                                           | 0.00012553        | 0.000125526          | 0.321869           | -3.10685                     | T down vs N                            | 25.207  | 12.0362   | 7.63985    | 1         |
| cg10461878  | IQCJ;IQCJ                                                       | 4.40E-06          | 4.40E-06             | 0.245144           | -4.07924                     | T down vs N                            | 46.006  | 18.513    | 6.4385     | 1         |
| cg10464775  | LAMP1                                                           | 0.00020633        | 0.000206329          | 0.235059           | -4.25424                     | T down vs N                            | 22.807  | 19.6358   | 13.7754    | 1         |
| cg10465028  | OTUB1;OTUB1                                                     | 6.12E-06          | 6.12E-06             | 0.258074           | -3.87486                     | T down vs N                            | 43.543  | 17.1841   | 6.31429    | 1         |
| cg10473158  | MESTIT1;MEST;MEST                                               | 0.00041057        | 0.000410573          | 0.262794           | -3.80526                     | T down vs N                            | 19.725  | 16.7272   | 13.5686    | 1         |
| cg10474597  | SERPINE3                                                        | 0.00037204        | 0.000372043          | 0.24208            | -4.13086                     | T down vs N                            | 20.15   | 18.8457   | 14.9647    | 1         |
| cg10475970  | PCDHGA4;PCDHGA6;PCDHGA1;PCDHG<br>A5;PCDHGB1;PCDHGB4;PCDHGA3;PC  | 0.00158262        | 0.00158262           | 3.73817            | 3.73817                      | T up vs N                              | 14.417  | 16.2849   | 18.0725    | 1         |
| cg10477621  | FERD3L                                                          | 0.00523936        | 0.00523936           | 4.55775            | 4.55775                      | T up vs N                              | 10.431  | 21.5494   | 33.0531    | 1         |
| cg10479097  | AQR                                                             | 0.00030624        | 0.000306236          | 0.29438            | -3.39697                     | T down vs N                            | 21.005  | 14.0066   | 10.6692    | 1         |
| cg10479234  | TBR1                                                            | 0.00017554        | 0.000175535          | 0.219808           | -4.54943                     | T down vs N                            | 23.571  | 21.4975   | 14.5926    | 1         |
| cg10479672  | IL1F8;IL1F8                                                     | 2.35E-05          | 2.35E-05             | 0.275773           | -3.62616                     | T down vs N                            | 34.514  | 15.5422   | 7.20503    | 1         |
| cg10480461  | C15orf60;C15orf60                                               | 0.00717983        | 0.00717983           | 0.311669           | -3.20854                     | T down vs N                            | 9.4841  | 12.7298   | 21.4757    | 1         |
| cg10481134  | C2orf58                                                         | 3.61E-05          | 3.61E-05             | 0.313806           | -3.18668                     | T down vs N                            | 31.936  | 12.581    | 6.30309    | 1         |
| cg10482356  | GNAO1;GNAO1                                                     | 4.61E-06          | 4.61E-06             | 3.65318            | 3.65318                      | T up vs N                              | 45.646  | 15.7218   | 5.51081    | 1         |
| cg10487970  | OTX1                                                            | 0.00654991        | 0.00654991           | 3.4967             | 3.4967                       | T up vs N                              | 9.756   | 14.6773   | 24.071     | 1         |
| cg10488050  | CHCHD3                                                          | 4.85E-07          | 4.85E-07             | 0.251039           | -3.98344                     | T down vs N                            | 65.343  | 17.8924   | 4.38117    | 1         |

| Probeset ID | UCSC_REFGENE_NAME                                                                                         | p-value<br>(Type) | p-value (T vs.<br>N) | Ratio (T<br>vs. N) | Fold-<br>Change (T<br>vs. N) | Fold-Change (T vs.<br>N) (Description) | F(Type) | SS (Type) | SS (Error) | F (Error) |
|-------------|-----------------------------------------------------------------------------------------------------------|-------------------|----------------------|--------------------|------------------------------|----------------------------------------|---------|-----------|------------|-----------|
|             | CPT1B;CPT1B;CPT1B;CHKB-<br>CPT1B;CPT1B;CPT1B;CPT1B;CPT1B<br>NOXO1;NOXO1;NOXO1                             | 2.28E-06          | 2.28E-06             | 3.09427            | 3.09427                      | T up vs N                              | 51.212  | 11.9502   | 3.73354    | 1         |
| cg10490842  |                                                                                                           | 0.00028574        | 0.000285744          | 0.297048           | -3.36646                     | T down vs N                            | 21.314  | 13.8007   | 10.3597    | 1         |
| cg10492935  | BEST1;BEST1                                                                                               | 0.00015233        | 0.000152329          | 0.281125           | -3.55713                     | T down vs N                            | 24.254  | 15.0818   | 9.94914    | 1         |
| cg10497894  | DCPS                                                                                                      | 6.62E-05          | 6.62E-05             | 0.286038           | -3.49604                     | T down vs N                            | 28.53   | 14.6728   | 8.22882    | 1         |
| cg10499172  | RPL31;TBC1D8                                                                                              | 3.12E-05          | 3.12E-05             | 0.278444           | -3.59138                     | T down vs N                            | 32.804  | 15.3105   | 7.46764    | 1         |
| cg10500702  | FLG                                                                                                       | 0.00159982        | 0.00159982           | 0.224951           | -4.44542                     | T down vs N                            | 14.379  | 20.8461   | 23.1969    | 1         |
| cg10500909  | CYP11B2                                                                                                   | 5.49E-05          | 5.49E-05             | 0.224121           | -4.46187                     | T down vs N                            | 29.55   | 20.9495   | 11.3431    | 1         |
| cg10501093  | TNFAIP2                                                                                                   | 0.00580196        | 0.00580196           | 3.9745             | 3.9745                       | T up vs N                              | 10.12   | 17.8343   | 28.1958    | 1         |
| cg10501602  | NOF5                                                                                                      | 6.94E-05          | 6.94E-05             | 3.4966             | 3.4966                       | T up vs N                              | 28.272  | 14.6766   | 8.30588    | 1         |
| cg10503827  | GPR37                                                                                                     | 0.00734556        | 0.00734556           | 3.24277            | 3.24277                      | T up vs N                              | 9.417   | 12.9626   | 22.0242    | 1         |
| cg10504632  | C7orf10                                                                                                   | 4.27E-06          | 4.27E-06             | 0.148648           | -6.72732                     | T down vs N                            | 46.239  | 34.032    | 11.7762    | 1         |
| cg10505355  | C12orf54                                                                                                  | 2.72E-05          | 2.72E-05             | 0.171132           | -5.84345                     | T down vs N                            | 33.621  | 29.1883   | 13.8903    | 1         |
| cg10509407  | CALN1;CALN1                                                                                               | 0.0003579         | 0.000357896          | 0.251708           | -3.97285                     | T down vs N                            | 20.318  | 17.8236   | 14.0356    | 1         |
| cg10512745  | DMRTA2                                                                                                    | 0.00146163        | 0.00146163           | 0.084394           | -11.8491                     | T down vs N                            | 14.705  | 57.2464   | 62.2871    | 1         |
| cg10513253  | SOC51                                                                                                     | 0.00497432        | 0.00497432           | 0.10716            | -9.33182                     | T down vs N                            | 12.247  | 31.9456   | 28.6934    | 1         |
| cg10514793  | LRDD;LRDD;LRDD                                                                                            | 0.00024263        | 0.000242633          | 0.317881           | -3.14583                     | T down vs N                            | 22.056  | 12.3024   | 8.92441    | 1         |
| cg10517290  | PGS1                                                                                                      | 0.00124271        | 0.00124271           | 0.212434           | -4.70735                     | T down vs N                            | 15.302  | 22.4768   | 23.5027    | 1         |
| cg10517650  | CCDC52                                                                                                    | 0.00312358        | 0.00312358           | 0.286434           | -3.4912                      | T down vs N                            | 12.076  | 14.6404   | 19.3972    | 1         |
|             | PCDHA6;PCDHA2;PCDHA1;PCDHA9;PC<br>DHA7;PCDHA1;PCDHA6;PCDHA10;PCD<br>HA5;PCDHA3;PCDHA4;PCDHA10;P<br>ZNF423 | 5.35E-05          | 5.35E-05             | 5.89399            | 5.89399                      | T up vs N                              | 29.7    | 29.4738   | 15.8779    | 1         |
| cg10519368  |                                                                                                           | 4.14E-06          | 4.14E-06             | 0.298981           | -3.34469                     | T down vs N                            | 46.469  | 13.6535   | 4.70117    | 1         |
| cg10520780  | ACADM;ACADM                                                                                               | 0.00184622        | 0.00184622           | 0.250578           | -3.99078                     | T down vs N                            | 13.869  | 17.9401   | 20.6975    | 1         |
| cg10523679  | ASCL2                                                                                                     | 0.00370386        | 0.00370386           | 10.1185            | 10.1185                      | T up vs N                              | 11.522  | 50.1678   | 69.6667    | 1         |
| cg10530560  | GLI1;GLI1;GLI1                                                                                            | 7.05E-07          | 7.05E-07             | 0.129197           | -7.74009                     | T down vs N                            | 61.667  | 39.2237   | 10.1769    | 1         |
|             | LRRC27;LRRC27;LRRC27;LRRC27;LRRC<br>27                                                                    | 0.00010725        | 0.00010725           | 0.211965           | -4.71777                     | T down vs N                            | 25.999  | 22.541    | 13.8717    | 1         |
| cg10530568  |                                                                                                           | 0.00058405        | 0.000584054          | 0.221638           | -4.51186                     | T down vs N                            | 18.248  | 21.2628   | 18.6435    | 1         |
| cg10531088  | ABLIM2;ABLIM2;ABLIM2;ABLIM2;ABLI<br>M2;ABLIM2;ABLIM2                                                      | 8.13E-05          | 8.13E-05             | 0.298001           | -3.35569                     | T down vs N                            | 27.431  | 13.7279   | 8.00721    | 1         |
| cg10532833  | SPINK5;SPINK5;SPINK5                                                                                      | 0.00040361        | 0.000403612          | 0.148102           | -6.7521                      | T down vs N                            | 19.798  | 34.1635   | 27.6097    | 1         |
| cg10533161  | STK24;STK24;STK24                                                                                         | 0.0006422         | 0.000642203          | 0.212228           | -4.71191                     | T down vs N                            | 17.862  | 22.5049   | 20.1594    | 1         |
| cg10533746  | C2orf81                                                                                                   | 0.00078413        | 0.000784125          | 0.098824           | -10.119                      | T down vs N                            | 17.064  | 50.1698   | 47.0412    | 1         |
| cg10535597  | CUX2                                                                                                      | 5.20E-05          | 5.20E-05             | 0.204277           | -4.8953                      |                                        |         |           |            |           |

| Probeset ID                                                     | UCSC_REFGENE_NAME            | p-value<br>(Type) | p-value (T vs.<br>N) | Ratio (T<br>vs. N) | Fold-<br>Change (T<br>vs. N) | Fold-Change (T vs.<br>N) (Description) | F(Type) | SS (Type) | SS (Error) | F (Error) |
|-----------------------------------------------------------------|------------------------------|-------------------|----------------------|--------------------|------------------------------|----------------------------------------|---------|-----------|------------|-----------|
| cg10587082                                                      | PLXNA2                       | 9.49E-05          | 9.49E-05             | 0.275068           | -3.63547                     | T down vs N                            | 26.629  | 15.6041   | 9.37576    | 1         |
| cg10587888                                                      | HEPH;HEPH;HEPH               | 0.00029851        | 0.00029851           | 0.209375           | -4.77612                     | T down vs N                            | 21.119  | 22.8996   | 17.3492    | 1         |
| cg10588362                                                      | C11orf85                     | 1.29E-05          | 1.29E-05             | 0.198919           | -5.02716                     | T down vs N                            | 38.36   | 24.4247   | 10.1877    | 1         |
| cg10592454                                                      | PRSS16;PRSS16                | 4.81E-05          | 4.81E-05             | 0.300604           | -3.32663                     | T down vs N                            | 30.286  | 13.5314   | 7.14865    | 1         |
| cg10592710                                                      | COL29A1;COL29A1              | 9.12E-07          | 9.12E-07             | 0.227131           | -4.40275                     | T down vs N                            | 59.244  | 20.5775   | 5.55737    | 1         |
| TBXAS1;TBXAS1;TBXAS1;TBXAS1;TBXA                                |                              |                   |                      |                    |                              |                                        |         |           |            |           |
| cg10592734                                                      | S1;TBXAS1                    | 0.00649302        | 0.00649302           | 0.289514           | -3.45406                     | T down vs N                            | 9.782   | 14.391    | 23.5387    | 1         |
| cg10593480                                                      | EIF1AY                       | 0.00559443        | 0.00559443           | 0.2682             | -3.72856                     | T down vs N                            | 14.09   | 9.01189   | 5.11663    | 1         |
| cg10593994                                                      | GLYATL3                      | 7.53E-05          | 7.53E-05             | 0.229092           | -4.36507                     | T down vs N                            | 27.841  | 20.3395   | 11.6889    | 1         |
| cg10594543                                                      | ADAMT512                     | 0.00173254        | 0.00173254           | 0.256034           | -3.90572                     | T down vs N                            | 14.094  | 17.386    | 19.7377    | 1         |
| cg10596609                                                      | UGT1A8                       | 0.00010142        | 0.000101424          | 0.186361           | -5.36593                     | T down vs N                            | 26.284  | 26.4373   | 16.0931    | 1         |
| cg10596768                                                      | G6PC                         | 0.00089972        | 0.000899724          | 0.295972           | -3.3787                      | T down vs N                            | 16.527  | 13.8833   | 13.4408    | 1         |
| cg10596956                                                      | OR52M1                       | 0.00028411        | 0.00028411           | 0.233708           | -4.27884                     | T down vs N                            | 21.34   | 19.7925   | 14.8396    | 1         |
| cg10598433                                                      | EBF3                         | 0.00010112        | 0.000101119          | 0.225044           | -4.44358                     | T down vs N                            | 26.3    | 20.8346   | 12.6751    | 1         |
| cg10598596                                                      | KLK10;KLK10;KLK10            | 0.00106478        | 0.00106478           | 0.232417           | -4.30261                     | T down vs N                            | 16.337  | 18.7705   | 17.2348    | 1         |
| cg10599438                                                      | PRTN3                        | 2.76E-05          | 2.76E-05             | 0.237247           | -4.21502                     | T down vs N                            | 33.529  | 19.3854   | 9.25073    | 1         |
| cg10599948                                                      | IZUMO1;RASIP1                | 2.98E-05          | 2.98E-05             | 3.47796            | 3.47796                      | T up vs N                              | 33.071  | 14.5515   | 7.04009    | 1         |
| cg10602757                                                      | FOXD4L1;FOX4L1               | 4.26E-06          | 4.26E-06             | 8.00504            | 8.00504                      | T up vs N                              | 46.258  | 40.5246   | 14.0168    | 1         |
| cg10606903                                                      | MRPL21;MRPL21                | 0.00015264        | 0.000152638          | 0.234965           | -4.25595                     | T down vs N                            | 24.245  | 19.6467   | 12.9657    | 1         |
| cg10610428                                                      | ANO2                         | 1.07E-05          | 1.07E-05             | 0.230898           | -4.33091                     | T down vs N                            | 39.588  | 20.1232   | 8.13311    | 1         |
| cg10611165                                                      | PROKR2                       | 0.00195696        | 0.00195696           | 0.290506           | -3.44227                     | T down vs N                            | 13.664  | 14.3117   | 16.7587    | 1         |
| cg10612274                                                      | MACROD1                      | 0.0018556         | 0.0018556            | 3.92433            | 3.92433                      | T up vs N                              | 13.851  | 17.5075   | 20.2243    | 1         |
| cg10612915                                                      | ALDH18A1;ALDH18A1            | 0.00047493        | 0.000474933          | 0.288482           | -3.46642                     | T down vs N                            | 19.106  | 14.474    | 12.1208    | 1         |
| cg10613224                                                      | CDK15                        | 2.30E-05          | 2.30E-05             | 0.12238            | -8.17128                     | T down vs N                            | 34.635  | 41.3294   | 19.0925    | 1         |
| cg10613381                                                      | C22orf45;C22orf45;UPB1       | 6.90E-05          | 6.90E-05             | 3.74049            | 3.74049                      | T up vs N                              | 28.306  | 16.3002   | 9.2138     | 1         |
| cg10613426                                                      | ELSPBP1                      | 0.00065019        | 0.000650187          | 0.279867           | -3.57312                     | T down vs N                            | 17.812  | 15.1886   | 13.6437    | 1         |
| cg10617784                                                      | VAX2                         | 0.00012321        | 0.000123206          | 0.209898           | -4.76421                     | T down vs N                            | 25.3    | 22.8266   | 14.4356    | 1         |
| cg10618882                                                      | LRRC25                       | 0.00016274        | 0.000162738          | 0.331487           | -3.01671                     | T down vs N                            | 23.934  | 11.419    | 7.63363    | 1         |
| cg10620866                                                      | HLA-DOA                      | 0.00438333        | 0.00438333           | 0.323255           | -3.09353                     | T down vs N                            | 10.986  | 11.9451   | 17.397     | 1         |
| cg10620881                                                      | PTPRN2;PTPRN2;PTPRN2         | 0.00026563        | 0.000265628          | 0.2063             | -4.84731                     | T down vs N                            | 21.644  | 23.335    | 17.2504    | 1         |
| cg10621374                                                      | CLIP3;ALKBH6;ALKBH6          | 4.73E-05          | 4.73E-05             | 0.28936            | -3.4559                      | T down vs N                            | 30.38   | 14.4033   | 7.5857     | 1         |
| cg10621924                                                      | POU6F2;POU6F2                | 0.00339693        | 0.00339693           | 0.26637            | -3.75418                     | T down vs N                            | 11.802  | 16.3906   | 22.2213    | 1         |
| cg10622126                                                      | AFF2;AFF2;AFF2;AFF2;AFF2     | 0.00010706        | 0.000107061          | 0.332549           | -3.00707                     | T down vs N                            | 26.008  | 11.353    | 6.98422    | 1         |
| cg10624665                                                      | FZD2                         | 0.00021352        | 0.000213516          | 4.58764            | 4.58764                      | T up vs N                              | 22.647  | 21.7355   | 15.3561    | 1         |
| cg10625365                                                      | SFTD2                        | 6.93E-06          | 6.93E-06             | 0.300193           | -3.33119                     | T down vs N                            | 42.65   | 13.5622   | 5.08784    | 1         |
| cg10625686                                                      | TCTEX1D1                     | 2.40E-06          | 2.40E-06             | 0.149984           | -6.66737                     | T down vs N                            | 50.794  | 33.7132   | 10.6196    | 1         |
| cg10627429                                                      | C10orf81                     | 6.86E-06          | 6.86E-06             | 0.173917           | -5.74987                     | T down vs N                            | 45.171  | 26.9712   | 8.95637    | 1         |
| cg10630893                                                      | OR2T2                        | 0.00011608        | 0.000116075          | 0.312496           | -3.20004                     | T down vs N                            | 25.599  | 12.6719   | 7.92017    | 1         |
| cg10631356                                                      | ELF5;ELF5                    | 0.00016461        | 0.000164614          | 0.267236           | -3.74201                     | T down vs N                            | 23.879  | 16.3103   | 10.9286    | 1         |
| cg10631684                                                      | PLBD2;PLBD2                  | 0.00095588        | 0.00095588           | 0.287003           | -3.48428                     | T down vs N                            | 16.293  | 14.594    | 14.3314    | 1         |
| cg10632342                                                      | TEX101;TEX101                | 0.00111363        | 0.00111363           | 0.262562           | -3.80862                     | T down vs N                            | 15.712  | 16.7493   | 17.0565    | 1         |
| cg10632600                                                      | SBN02                        | 0.00334503        | 0.00334503           | 0.279369           | -3.5795                      | T down vs N                            | 11.852  | 15.2312   | 20.562     | 1         |
| cg10633746                                                      | SMCR7;SMCR7;SMCR7;SMCR7      | 0.00016851        | 0.000168513          | 3.28984            | 3.28984                      | T up vs N                              | 23.766  | 13.2821   | 8.94177    | 1         |
| cg10634115                                                      | UTS2R                        | 2.70E-05          | 2.70E-05             | 0.27048            | -3.69713                     | T down vs N                            | 33.661  | 16.0134   | 7.61167    | 1         |
| CACNA1C;CACNA1C;CACNA1C;CACNA1C;CACNA1C;CACNA1C;CACNA1C;CACNA1C |                              |                   |                      |                    |                              |                                        |         |           |            |           |
| cg10635895                                                      | NA1C;CACNA1C;CACNA1C;CACNA1C | 0.00114997        | 0.00114997           | 3.84949            | 3.84949                      | T up vs N                              | 15.591  | 17.0178   | 17.4641    | 1         |
| cg10636246                                                      | AIM2                         | 3.04E-05          | 3.04E-05             | 0.216487           | -4.61921                     | T down vs N                            | 32.952  | 21.9317   | 10.649     | 1         |
| cg10637995                                                      | BASE                         | 0.00017864        | 0.000178642          | 0.283009           | -3.53345                     | T down vs N                            | 23.487  | 14.9235   | 10.1662    | 1         |
| cg10638734                                                      | GPRC5B                       | 8.35E-05          | 8.35E-05             | 4.73093            | 4.73093                      | T up vs N                              | 27.293  | 22.622    | 13.262     | 1         |
| cg10642548                                                      | C10orf41;C10orf41            | 2.90E-06          | 2.90E-06             | 4.90969            | 4.90969                      | T up vs N                              | 49.261  | 23.7147   | 7.70252    | 1         |
| cg10645640                                                      | CEACAM7                      | 0.00112026        | 0.00112026           | 0.318011           | -3.14455                     | T down vs N                            | 15.69   | 12.2936   | 12.5369    | 1         |
| cg10647513                                                      | HBA1                         | 0.00326182        | 0.00326182           | 0.239022           | -4.18371                     | T down vs N                            | 11.934  | 19.185    | 25.721     | 1         |
| PCDHA2;PCDHA1;PCDHA3;PCDHA3;PC                                  |                              |                   |                      |                    |                              |                                        |         |           |            |           |
| cg10649903                                                      | DHA1                         | 4.23E-06          | 4.23E-06             | 8.40682            | 8.40682                      | T up vs N                              | 46.304  | 42.4552   | 14.6702    | 1         |
| cg10650018                                                      | HTR7;HTR7;HTR7               | 1.08E-05          | 1.08E-05             | 5.0427             | 5.0427                       | T up vs N                              | 39.522  | 24.5181   | 9.92597    | 1         |
| cg10653926                                                      | HMHA1                        | 0.00096767        | 0.000967671          | 0.301624           | -3.31538                     | T down vs N                            | 16.246  | 13.4552   | 13.2515    | 1         |
| cg10654546                                                      | OBFC2B                       | 0.00169821        | 0.00169821           | 0.21957            | -4.55436                     | T down vs N                            | 14.165  | 21.5282   | 24.3173    | 1         |
| cg10654866                                                      | PGLS                         | 0.00149992        | 0.00149992           | 0.250933           | -3.98512                     | T down vs N                            | 14.611  | 17.9033   | 19.605     | 1         |
| cg10655041                                                      | PLUNC;PLUNC                  | 0.0010686         | 0.0010686            | 0.311294           | -3.2124                      | T down vs N                            | 15.868  | 12.7561   | 12.8624    | 1         |
| cg10656485                                                      | MKL1                         | 2.76E-05          | 2.76E-05             | 0.302851           | -3.30195                     | T down vs N                            | 33.538  | 13.3642   | 6.37562    | 1         |
| cg10656687                                                      | DACT2                        | 1.26E-05          | 1.26E-05             | 0.332763           | -3.00515                     | T down vs N                            | 38.529  | 11.3398   | 4.70914    | 1         |
| cg10658197                                                      | ENTHD1                       | 3.62E-05          | 3.62E-05             | 0.307409           | -3.25299                     | T down vs N                            | 31.919  | 13.0321   | 6.53266    | 1         |
| cg10658666                                                      | OTX1                         | 0.00574963        | 0.00574963           | 4.43769            | 4.43769                      | T up vs N                              | 10.148  | 20.7976   | 32.7916    | 1         |
| cg10658779                                                      | C10orf11                     | 8.58E-06          | 8.58E-06             | 5.98319            | 5.98319                      | T up vs N                              | 41.132  | 29.975    | 11.6601    | 1         |
| cg10660256                                                      | BHMT;BHMT                    | 1.19E-05          | 1.19E-05             | 12.7896            | 12.7896                      | T up vs N                              | 38.906  | 60.8383   | 25.0197    | 1         |
| cg10660965                                                      | VN1R2;VN1R2                  | 0.00181436        | 0.00181436           | 0.251875           | -3.97023                     | T down vs N                            | 13.93   | 17.8065   | 20.4526    | 1         |
| cg10664339                                                      | SMARCE1                      | 0.00217306        | 0.00217306           | 0.300969           | -3.3226                      | T down vs N                            | 13.3    | 13.5041   | 16.246     | 1         |
| cg10667338                                                      | LIN7B                        | 3.16E-05          | 3.16E-05             | 0.328126           | -3.04761                     | T down vs N                            | 32.714  | 11.6309   | 5.68856    | 1         |
| cg10668189                                                      | GPR84                        | 9.87E-06          | 9.87E-06             | 0.176343           | -5.67077                     | T down vs N                            | 40.162  | 28.2048   | 11.2365    | 1         |
| cg10671066                                                      | SLAMF6                       | 8.52E-07          | 8.52E-07             | 0.160641           | -6.22504                     | T down vs N                            | 59.873  | 31.3177   | 8.36905    | 1         |

| Probeset ID                                                     | UCSC_REFGENE_NAME             | p-value<br>(Type) | p-value (T vs.<br>N) | Ratio (T<br>vs. N) | Fold-<br>Change (T<br>vs. N) | Fold-Change (T vs.<br>N) (Description) | F(Type) | SS (Type) | SS (Error) | F (Error) |
|-----------------------------------------------------------------|-------------------------------|-------------------|----------------------|--------------------|------------------------------|----------------------------------------|---------|-----------|------------|-----------|
| cg10671180                                                      | SNORD115-39                   | 0.00018207        | 0.000182067          | 0.278808           | -3.5867                      | T down vs N                            | 23.397  | 15.2792   | 10.4488    | 1         |
| cg10672416                                                      | C12orf65;C12orf65             | 0.00191134        | 0.00191134           | 0.325982           | -3.06765                     | T down vs N                            | 13.747  | 11.7681   | 13.6973    | 1         |
| cg10673328                                                      | DEFB107A;DEFB107B             | 2.63E-06          | 2.63E-06             | 0.162065           | -6.17038                     | T down vs N                            | 50.035  | 31.0163   | 9.91829    | 1         |
| cg10673740                                                      | BAG3                          | 0.00442492        | 0.00442492           | 3.06154            | 3.06154                      | T up vs N                              | 10.956  | 11.7262   | 17.1245    | 1         |
| cg10676604                                                      | DIP2C                         | 0.00016589        | 0.000165893          | 0.321574           | -3.1097                      | T down vs N                            | 23.842  | 12.0557   | 8.09047    | 1         |
| cg10678266                                                      | MPP6                          | 0.0001359         | 0.000135897          | 0.302594           | -3.30475                     | T down vs N                            | 24.814  | 13.3832   | 8.62964    | 1         |
| PCDHGA4;PCDHGA9;PCDHGA1;PCDHG<br>B1;PCDHGB6;PCDHGA11;PCDHGA11;P |                               |                   |                      |                    |                              |                                        |         |           |            |           |
| cg10679597                                                      | CDHGA11;PCDHGB3;PCDHGA11;PCD  | 7.44E-05          | 7.44E-05             | 4.28299            | 4.28299                      | T up vs N                              | 27.903  | 19.8189   | 11.3647    | 1         |
| cg10680210                                                      | CCDC88B                       | 0.00160171        | 0.00160171           | 0.28448            | -3.51518                     | T down vs N                            | 14.757  | 13.9305   | 14.1603    | 1         |
| cg10684794                                                      | PRX;PRX                       | 0.00075127        | 0.000751272          | 0.23181            | -4.31388                     | T down vs N                            | 17.233  | 20.0152   | 18.5828    | 1         |
| cg10687644                                                      | ATG16L2                       | 0.0001189         | 0.0001189            | 0.310428           | -3.22136                     | T down vs N                            | 25.478  | 12.817    | 8.04886    | 1         |
| cg10687936                                                      | ZNF148                        | 7.89E-05          | 7.89E-05             | 0.181878           | -5.49819                     | T down vs N                            | 27.589  | 27.2091   | 15.78      | 1         |
| cg10690063                                                      | ALOX5                         | 1.12E-05          | 1.12E-05             | 0.315885           | -3.16571                     | T down vs N                            | 39.276  | 12.438    | 5.06687    | 1         |
| cg10690657                                                      | C21orf15                      | 0.00191487        | 0.00191487           | 0.265769           | -3.76267                     | T down vs N                            | 13.74   | 16.4467   | 19.1519    | 1         |
| cg10691387                                                      | IQCF2                         | 9.96E-05          | 9.96E-05             | 0.265118           | -3.77191                     | T down vs N                            | 26.38   | 16.5076   | 10.0122    | 1         |
| cg10692636                                                      | DNAH17                        | 0.00010856        | 0.000108557          | 0.208827           | -4.78865                     | T down vs N                            | 25.938  | 22.9765   | 14.1733    | 1         |
| cg10692693                                                      | CUX1;CUX1;CUX1                | 0.00055222        | 0.00055222           | 0.192789           | -5.18701                     | T down vs N                            | 18.478  | 25.3807   | 21.9766    | 1         |
| cg10695234                                                      | RAD54B                        | 0.00039015        | 0.000390152          | 0.212949           | -4.69595                     | T down vs N                            | 19.944  | 22.4065   | 17.9756    | 1         |
| cg10700435                                                      | SMAP2                         | 1.36E-05          | 1.36E-05             | 0.170008           | -5.88208                     | T down vs N                            | 38.006  | 29.4066   | 12.3799    | 1         |
| cg10700634                                                      | PLEKHG5                       | 0.00173807        | 0.00173807           | 0.238878           | -4.18623                     | T down vs N                            | 14.082  | 19.2011   | 21.8159    | 1         |
| cg10701252                                                      | WNT5A                         | 0.00724658        | 0.00724658           | 4.4488             | 4.4488                       | T up vs N                              | 9.4568  | 20.8674   | 35.3055    | 1         |
| cg10703826                                                      | TBX15;TBX15                   | 0.00685737        | 0.00685737           | 0.239437           | -4.17646                     | T down vs N                            | 9.6197  | 19.1385   | 31.8322    | 1         |
| cg10706073                                                      | SKAP1;SKAP1                   | 0.00034711        | 0.000347113          | 0.300834           | -3.32409                     | T down vs N                            | 20.452  | 13.5142   | 10.5725    | 1         |
| cg10708400                                                      | TRIM15                        | 9.21E-05          | 9.21E-05             | 0.256581           | -3.89741                     | T down vs N                            | 26.783  | 17.3316   | 10.3538    | 1         |
| cg10710218                                                      | ACOT11;ACOT11                 | 0.0002211         | 0.0002211            | 0.304288           | -3.28636                     | T down vs N                            | 22.485  | 13.2585   | 9.43473    | 1         |
| cg10710412                                                      | NKG7                          | 5.30E-06          | 5.30E-06             | 0.299322           | -3.34088                     | T down vs N                            | 44.6    | 13.6278   | 4.88888    | 1         |
| cg10713515                                                      | COMMD3                        | 6.40E-05          | 6.40E-05             | 0.178853           | -5.59119                     | T down vs N                            | 28.714  | 27.7473   | 15.4615    | 1         |
| cg10714284                                                      | HLA-DMB                       | 5.20E-05          | 5.20E-05             | 0.249066           | -4.01501                     | T down vs N                            | 29.858  | 18.0974   | 9.69783    | 1         |
| cg10714639                                                      | HMHA1                         | 0.00011304        | 0.000113035          | 0.186673           | -5.35696                     | T down vs N                            | 25.733  | 26.3846   | 16.4051    | 1         |
| cg10714973                                                      | C3P1                          | 0.00019848        | 0.000198478          | 0.259055           | -3.86018                     | T down vs N                            | 22.989  | 17.0879   | 11.893     | 1         |
| cg10716356                                                      | CENPF                         | 0.00093051        | 0.000930512          | 0.307343           | -3.25369                     | T down vs N                            | 16.397  | 13.0368   | 12.7214    | 1         |
| cg10719522                                                      | PRHOXNB                       | 1.73E-07          | 1.73E-07             | 0.204748           | -4.88404                     | T down vs N                            | 76.346  | 23.5588   | 4.9373     | 1         |
| cg10720210                                                      | C17orf66                      | 0.00027089        | 0.00027089           | 0.324149           | -3.085                       | T down vs N                            | 21.555  | 11.8868   | 8.8235     | 1         |
| cg10720545                                                      | RELB                          | 0.00023813        | 0.000238129          | 0.272853           | -3.66498                     | T down vs N                            | 22.142  | 15.8002   | 11.4173    | 1         |
| cg10721782                                                      | RHCG                          | 7.19E-05          | 7.19E-05             | 4.6196             | 4.6196                       | T up vs N                              | 28.088  | 21.9341   | 12.4943    | 1         |
| cg10722426                                                      | CNTD2                         | 0.00014357        | 0.000143568          | 3.01241            | 3.01241                      | T up vs N                              | 24.544  | 11.3896   | 7.42491    | 1         |
| cg10723617                                                      | MSI2;MSI2                     | 9.85E-05          | 9.85E-05             | 0.301375           | -3.31813                     | T down vs N                            | 26.433  | 13.4738   | 8.15582    | 1         |
| cg10723962                                                      | HIST1H4F                      | 0.00092776        | 0.000927757          | 14.5811            | 14.5811                      | T up vs N                              | 16.408  | 67.2579   | 65.5851    | 1         |
| cg10724690                                                      | TMEM202                       | 0.00030055        | 0.000300552          | 0.228907           | -4.36859                     | T down vs N                            | 21.088  | 20.3618   | 15.4488    | 1         |
| cg10725344                                                      | FAM180A                       | 0.00198414        | 0.00198414           | 0.315862           | -3.16594                     | T down vs N                            | 13.616  | 12.4396   | 14.6181    | 1         |
| cg10726463                                                      | MIR659                        | 0.00016801        | 0.000168009          | 0.151067           | -6.61957                     | T down vs N                            | 23.781  | 33.4579   | 22.5109    | 1         |
| cg10726475                                                      | WWTR1;WWTR1;WWTR1             | 2.32E-06          | 2.32E-06             | 24.553             | 24.553                       | T up vs N                              | 51.079  | 95.9596   | 30.0583    | 1         |
| cg10731256                                                      | NIT2                          | 6.25E-05          | 6.25E-05             | 0.261995           | -3.81686                     | T down vs N                            | 28.841  | 16.8035   | 9.32191    | 1         |
| cg10736208                                                      | TNXB                          | 0.00107505        | 0.00107505           | 0.222366           | -4.49709                     | T down vs N                            | 15.845  | 21.1704   | 21.3775    | 1         |
| cg10743062                                                      | NCOA6                         | 8.16E-05          | 8.16E-05             | 0.24226            | -4.1278                      | T down vs N                            | 27.417  | 18.826    | 10.9866    | 1         |
| cg10743390                                                      | VSTM2B                        | 2.20E-05          | 2.20E-05             | 3.38687            | 3.38687                      | T up vs N                              | 34.919  | 13.9384   | 6.38659    | 1         |
| cg10747192                                                      | MACROD1                       | 7.43E-05          | 7.43E-05             | 0.223277           | -4.47875                     | T down vs N                            | 27.907  | 21.0554   | 12.0717    | 1         |
| cg10748867                                                      | MRT04;KIAA0090                | 0.00095375        | 0.000953751          | 0.23025            | -4.3431                      | T down vs N                            | 16.302  | 20.2005   | 19.8267    | 1         |
| cg10749994                                                      | DNMT3A;DNMT3A;DNMT3A          | 0.00026199        | 0.00026199           | 0.079479           | -12.582                      | T down vs N                            | 21.706  | 60.0594   | 44.271     | 1         |
| cg10751811                                                      | CYP421                        | 5.36E-06          | 5.36E-06             | 0.254289           | -3.93253                     | T down vs N                            | 44.526  | 17.561    | 6.31044    | 1         |
| cg10752406                                                      | AZU1                          | 1.70E-05          | 1.70E-05             | 0.174553           | -5.72891                     | T down vs N                            | 36.54   | 28.5374   | 12.4957    | 1         |
| cg10758466                                                      | MPP2                          | 1.92E-05          | 1.92E-05             | 0.292989           | -3.4131                      | T down vs N                            | 35.772  | 14.1153   | 6.31341    | 1         |
| cg10758875                                                      | MNS1;TEX9                     | 0.00220422        | 0.00220422           | 0.300898           | -3.32339                     | T down vs N                            | 13.251  | 13.5094   | 16.3126    | 1         |
| cg10758902                                                      | OVOL1                         | 1.72E-05          | 1.72E-05             | 0.172472           | -5.79805                     | T down vs N                            | 36.486  | 28.931    | 12.6868    | 1         |
| cg10759286                                                      | KIAA1751                      | 2.34E-05          | 2.34E-05             | 0.275227           | -3.63337                     | T down vs N                            | 34.544  | 15.5901   | 7.22106    | 1         |
| cg10759293                                                      | NAA20;NAA20;NAA20             | 6.77E-06          | 6.77E-06             | 0.308617           | -3.24026                     | T down vs N                            | 42.817  | 12.9456   | 4.83751    | 1         |
| cg10761315                                                      | ASPG                          | 0.00194629        | 0.00194629           | 5.6469             | 5.6469                       | T up vs N                              | 13.683  | 28.0678   | 32.8209    | 1         |
| cg10768564                                                      | ZNF414;ZNF414                 | 0.00112513        | 0.00112513           | 3.05003            | 3.05003                      | T up vs N                              | 15.673  | 11.6474   | 11.8903    | 1         |
| cg10768734                                                      | TRDN                          | 4.87E-05          | 4.87E-05             | 0.146353           | -6.83278                     | T down vs N                            | 30.219  | 34.5897   | 18.3143    | 1         |
| cg10769011                                                      | FOXN1                         | 6.65E-06          | 6.65E-06             | 0.246024           | -4.06464                     | T down vs N                            | 42.939  | 18.4187   | 6.86328    | 1         |
| cg10769618                                                      | KLHL23                        | 0.0004035         | 0.000403502          | 0.260467           | -3.83925                     | T down vs N                            | 19.799  | 16.9506   | 13.6981    | 1         |
| cg10769767                                                      | PAX5                          | 1.56E-05          | 1.56E-05             | 0.221273           | -4.51931                     | T down vs N                            | 37.084  | 21.3094   | 9.19393    | 1         |
| CPT1B;CPT1B;CPT1B;CHKB-<br>CPT1B;CPT1B;CPT1B;CPT1B;CPT1B        |                               |                   |                      |                    |                              |                                        |         |           |            |           |
| cg10770023                                                      | CPT1B;CPT1B;CPT1B;CPT1B;CPT1B | 6.63E-05          | 6.63E-05             | 7.34837            | 7.34837                      | T up vs N                              | 28.522  | 37.2581   | 20.9008    | 1         |
| cg10773224                                                      | KNG1;KNG1;KNG1                | 0.00034909        | 0.000349092          | 0.254582           | -3.928                       | T down vs N                            | 20.427  | 17.5314   | 13.732     | 1         |
| cg10778072                                                      | PADI1                         | 3.00E-05          | 3.00E-05             | 0.309355           | -3.23254                     | T down vs N                            | 33.039  | 12.893    | 6.24382    | 1         |
| cg10778295                                                      | AFP                           | 0.00250832        | 0.00250832           | 0.223159           | -4.4811                      | T down vs N                            | 12.809  | 21.0702   | 26.3195    | 1         |
| cg10778971                                                      | IFI27;IFI27;IFI27;IFI27       | 1.66E-06          | 1.66E-06             | 0.302475           | -3.30606                     | T down vs N                            | 53.878  | 13.3921   | 3.97704    | 1         |
| cg10781408                                                      | C2CD4D;LOC100132111           | 1.24E-05          | 1.24E-05             | 13.1166            | 13.1166                      | T up vs N                              | 38.615  | 62.0495   | 25.71      | 1         |
| cg10782923                                                      | DGKA;DGKA;DGKA;DGKA           | 0.00103701        | 0.00103701           | 3.07821            | 3.07821                      | T up vs N                              | 15.982  | 11.8403   | 11.8539    | 1         |

| Probeset ID                         | UCSC_REFGENE_NAME       | p-value<br>(Type) | p-value (T vs.<br>N) | Ratio (T<br>vs. N) | Fold-<br>Change (T<br>vs. N) | Fold-Change (T vs.<br>N) (Description) | F(Type) | SS (Type) | SS (Error) | F (Error) |
|-------------------------------------|-------------------------|-------------------|----------------------|--------------------|------------------------------|----------------------------------------|---------|-----------|------------|-----------|
| cg10783331                          | TYW3;TYW3;TYW3          | 0.00495149        | 0.00495149           | 0.309658           | -3.22937                     | T down vs N                            | 10.606  | 12.8715   | 19.4184    | 1         |
| cg10783870                          | WDR46;WDR46             | 0.00164223        | 0.00164223           | 0.324382           | -3.08278                     | T down vs N                            | 14.285  | 11.8716   | 13.2972    | 1         |
| cg10787409                          | RHPN1                   | 0.00264793        | 0.00264793           | 0.279859           | -3.57323                     | T down vs N                            | 12.626  | 15.1894   | 19.2483    | 1         |
| cg10788217                          | TTC12                   | 1.36E-05          | 1.36E-05             | 34.8251            | 34.8251                      | T up vs N                              | 37.979  | 118.06    | 49.7372    | 1         |
| cg10789956                          | DPYSL2                  | 1.21E-05          | 1.21E-05             | 4.59107            | 4.59107                      | T up vs N                              | 38.752  | 21.7569   | 8.98303    | 1         |
| cg10790685                          | VIM                     | 0.00019771        | 0.000197706          | 0.328622           | -3.04301                     | T down vs N                            | 23.007  | 11.5993   | 8.06664    | 1         |
| cg10792923                          | UBE2D3;CISD2;UBE2D3     | 0.00049717        | 0.000497166          | 0.248493           | -4.02426                     | T down vs N                            | 18.915  | 18.1573   | 15.3595    | 1         |
| cg10792987                          | ELL                     | 0.0003011         | 0.000301099          | 3.34449            | 3.34449                      | T up vs N                              | 21.08   | 13.6522   | 10.3621    | 1         |
| cg10793301                          | HMGB1L1                 | 7.11E-06          | 7.11E-06             | 0.215853           | -4.63279                     | T down vs N                            | 42.459  | 22.0159   | 8.29636    | 1         |
| cg10795509                          | HSPC072;LOC100270804    | 0.00027991        | 0.000279908          | 0.189105           | -5.28806                     | T down vs N                            | 21.407  | 25.9792   | 19.4173    | 1         |
| cg10795659                          | TMEM171;TMEM171         | 3.97E-05          | 3.97E-05             | 12.722             | 12.722                       | T up vs N                              | 31.38   | 60.5855   | 30.8909    | 1         |
| cg10800250                          | RP1L1                   | 0.00162798        | 0.00162798           | 0.317965           | -3.145                       | T down vs N                            | 14.316  | 12.2967   | 13.7433    | 1         |
| cg10801633                          | PEX14                   | 9.57E-06          | 9.57E-06             | 0.299273           | -3.34143                     | T down vs N                            | 40.375  | 13.6315   | 5.40194    | 1         |
| cg10805039                          | NXN                     | 7.02E-05          | 7.02E-05             | 0.256719           | -3.89531                     | T down vs N                            | 28.213  | 17.3179   | 9.82117    | 1         |
| cg10806146                          | SLC20A2                 | 0.00477071        | 0.00477071           | 0.31291            | -3.19581                     | T down vs N                            | 10.721  | 12.6431   | 18.8686    | 1         |
| LRRFIP1;LRRFIP1;LRRFIP1;LRRFIP1;LRR |                         |                   |                      |                    |                              |                                        |         |           |            |           |
| cg10806645                          | FIP1                    | 9.60E-08          | 9.60E-08             | 0.25574            | -3.91022                     | T down vs N                            | 83.353  | 17.4153   | 3.34296    | 1         |
| cg10807003                          | ZNF366                  | 6.93E-05          | 6.93E-05             | 0.301694           | -3.31462                     | T down vs N                            | 28.283  | 13.4501   | 7.60881    | 1         |
| cg10808392                          | MED1                    | 0.00057461        | 0.000574605          | 0.208326           | -4.80018                     | T down vs N                            | 18.315  | 23.047    | 20.1341    | 1         |
| cg10809832                          | SCARNA10;NCAPD2         | 0.00280237        | 0.00280237           | 0.269127           | -3.71572                     | T down vs N                            | 12.436  | 16.1364   | 20.7609    | 1         |
| cg10811052                          | FAAH2                   | 4.45E-07          | 4.45E-07             | 0.151454           | -6.60265                     | T down vs N                            | 66.197  | 33.3674   | 8.06496    | 1         |
| cg10812451                          | MS4A15;MS4A15           | 4.13E-05          | 4.13E-05             | 0.298945           | -3.3451                      | T down vs N                            | 31.158  | 13.6563   | 7.0128     | 1         |
| cg10812717                          | ERMN;ERMN               | 0.00255239        | 0.00255239           | 3.12165            | 3.12165                      | T up vs N                              | 12.75   | 12.1373   | 15.2312    | 1         |
| cg10812889                          | SPRR2D                  | 0.00053152        | 0.000531524          | 0.176881           | -5.65351                     | T down vs N                            | 18.636  | 28.1058   | 24.13      | 1         |
| cg10813720                          | AIM1L;AIM1L             | 0.00015372        | 0.000153722          | 0.318347           | -3.14122                     | T down vs N                            | 24.21   | 12.271    | 8.10966    | 1         |
| cg10818781                          | PHB2;PHB2;EMG1          | 0.00020927        | 0.000209274          | 0.238641           | -4.19039                     | T down vs N                            | 22.741  | 19.2278   | 13.5285    | 1         |
| cg10818833                          | ANKS1B;ANKS1B;ANKS1B    | 9.13E-05          | 9.13E-05             | 8.4664             | 8.4664                       | T up vs N                              | 26.827  | 42.7373   | 25.4889    | 1         |
| cg10818986                          | OR2T8                   | 3.50E-06          | 3.50E-06             | 0.161591           | -6.18845                     | T down vs N                            | 47.766  | 31.1161   | 10.4228    | 1         |
| cg10819050                          | TRPM8                   | 0.0012441         | 0.0012441            | 0.256114           | -3.90452                     | T down vs N                            | 15.297  | 17.3781   | 18.1762    | 1         |
| cg10819350                          | ATG4D                   | 8.33E-06          | 8.33E-06             | 0.142977           | -6.99412                     | T down vs N                            | 41.336  | 35.435    | 13.7158    | 1         |
| cg10819467                          | TSSC4                   | 0.00024659        | 0.000246588          | 0.325407           | -3.07308                     | T down vs N                            | 21.982  | 11.8052   | 8.59257    | 1         |
| cg10820186                          | DMBT1;DMBT1;DMBT1       | 0.00015067        | 0.000150671          | 0.30451            | -3.28397                     | T down vs N                            | 24.308  | 13.2423   | 8.7165     | 1         |
| cg10820203                          | HSPG2                   | 1.03E-05          | 1.03E-05             | 0.240364           | -4.16035                     | T down vs N                            | 39.862  | 19.0352   | 7.64037    | 1         |
| cg10820936                          | MREG                    | 0.00330926        | 0.00330926           | 0.222993           | -4.48444                     | T down vs N                            | 11.887  | 21.0911   | 28.3889    | 1         |
| cg10822352                          | FRMD4A                  | 1.13E-05          | 1.13E-05             | 0.206274           | -4.84791                     | T down vs N                            | 39.25   | 23.3387   | 9.51378    | 1         |
| cg10822718                          | GPX6                    | 0.00095703        | 0.00095703           | 0.261011           | -3.83125                     | T down vs N                            | 16.289  | 16.8981   | 16.5988    | 1         |
| cg10823322                          | CRYGD                   | 7.50E-05          | 7.50E-05             | 0.258047           | -3.87526                     | T down vs N                            | 27.859  | 17.1867   | 9.8705     | 1         |
| FGFR1;FGFR1;FGFR1;FGFR1;FGFR1;FG    |                         |                   |                      |                    |                              |                                        |         |           |            |           |
| cg10823844                          | FR1;FGFR1               | 1.54E-05          | 1.54E-05             | 0.223017           | -4.48397                     | T down vs N                            | 37.191  | 21.0881   | 9.07231    | 1         |
| cg10825876                          | PLA2R1;PLA2R1           | 0.00735252        | 0.00735252           | 8.47281            | 8.47281                      | T up vs N                              | 9.4142  | 42.7676   | 72.6859    | 1         |
| SLC26A11;SLC26A11;SLC26A11;SLC26    |                         |                   |                      |                    |                              |                                        |         |           |            |           |
| cg10826338                          | A11;SGSH                | 5.26E-06          | 5.26E-06             | 0.254461           | -3.92987                     | T down vs N                            | 44.656  | 17.5436   | 6.28577    | 1         |
| cg10827479                          | TCHHL1                  | 0.00080476        | 0.000804762          | 0.252086           | -3.96689                     | T down vs N                            | 16.962  | 17.7848   | 16.7763    | 1         |
| cg10828284                          | MOV10L1;MOV10L1;MOV10L1 | 0.00011025        | 0.000110252          | 3.77298            | 3.77298                      | T up vs N                              | 25.859  | 16.5147   | 10.2182    | 1         |
| cg10830219                          | ADARB2                  | 0.00547644        | 0.00547644           | 0.300502           | -3.32777                     | T down vs N                            | 10.296  | 13.539    | 21.04      | 1         |
| cg10830649                          | GALNT3                  | 0.00020618        | 0.000206183          | 10.778             | 10.778                       | T up vs N                              | 22.81   | 52.9427   | 37.1364    | 1         |
| cg10832076                          | SLCO1A2;SLCO1A2         | 1.06E-06          | 1.06E-06             | 0.124959           | -8.00263                     | T down vs N                            | 57.854  | 40.5128   | 11.2042    | 1         |
| cg10832108                          | NEUROG1;NEUROG1         | 1.95E-05          | 1.95E-05             | 0.317296           | -3.15164                     | T down vs N                            | 35.665  | 12.342    | 5.5369     | 1         |
| cg10832304                          | DLL3;DLL3               | 4.50E-05          | 4.50E-05             | 26.6619            | 26.6619                      | T up vs N                              | 30.669  | 100.964   | 52.6724    | 1         |
| cg10832655                          | C4orf31                 | 1.89E-06          | 1.89E-06             | 0.192515           | -5.19441                     | T down vs N                            | 52.792  | 25.4247   | 7.7057     | 1         |
| cg10832708                          | ZSCAN10                 | 0.00050199        | 0.000501994          | 0.235377           | -4.24851                     | T down vs N                            | 18.874  | 19.5992   | 16.6147    | 1         |
| cg10832938                          | SIX3                    | 2.26E-06          | 2.26E-06             | 0.297204           | -3.3647                      | T down vs N                            | 51.308  | 13.7887   | 4.2999     | 1         |
| cg10833066                          | FAM109A                 | 0.00096342        | 0.000963423          | 0.132985           | -7.51962                     | T down vs N                            | 16.263  | 38.1237   | 37.5074    | 1         |
| cg10833393                          | IGFL2;IGFL2             | 5.24E-05          | 5.24E-05             | 0.31477            | -3.17692                     | T down vs N                            | 29.807  | 12.5144   | 6.7175     | 1         |
| cg10833439                          | MX1                     | 5.36E-06          | 5.36E-06             | 0.239626           | -4.17316                     | T down vs N                            | 44.518  | 19.1174   | 6.8709     | 1         |
| cg10835712                          | OTX2;OTX2               | 8.81E-06          | 8.81E-06             | 0.226813           | -4.40891                     | T down vs N                            | 40.945  | 20.6164   | 8.05627    | 1         |
| cg10836110                          | SHROOM1                 | 0.00014214        | 0.000142141          | 4.61121            | 4.61121                      | T up vs N                              | 24.592  | 21.882    | 14.2366    | 1         |
| cg10836431                          | OR4K17                  | 2.68E-05          | 2.68E-05             | 0.259345           | -3.85587                     | T down vs N                            | 33.714  | 17.0596   | 8.09628    | 1         |
| cg10837110                          | GABRD                   | 0.00055568        | 0.000555683          | 0.17545            | -5.69964                     | T down vs N                            | 18.453  | 28.3701   | 24.5994    | 1         |
| cg10837251                          | TMEM191A                | 2.86E-05          | 2.86E-05             | 4.86163            | 4.86163                      | T up vs N                              | 33.32   | 23.4223   | 11.2472    | 1         |
| cg10840864                          | PSMC5;FTSJ3             | 0.00026395        | 0.000263952          | 0.235996           | -4.23736                     | T down vs N                            | 21.672  | 19.5281   | 14.4171    | 1         |
| cg10841138                          | RIMBP2                  | 0.00029537        | 0.000295365          | 0.143344           | -6.97624                     | T down vs N                            | 21.166  | 35.3417   | 26.7158    | 1         |
| cg10842080                          | RNF126P1                | 6.01E-06          | 6.01E-06             | 3.61835            | 3.61835                      | T up vs N                              | 43.677  | 15.4902   | 5.67446    | 1         |
| cg10843046                          | POLG;POLG               | 2.22E-05          | 2.22E-05             | 0.234865           | -4.25777                     | T down vs N                            | 34.866  | 19.6583   | 9.02124    | 1         |
| cg10843401                          | STK32C                  | 0.00011485        | 0.000114847          | 0.328929           | -3.04017                     | T down vs N                            | 25.653  | 11.5798   | 7.22249    | 1         |
| cg10846614                          | CNGA2                   | 0.00014285        | 0.00014285           | 0.322921           | -3.09674                     | T down vs N                            | 24.568  | 11.967    | 7.79357    | 1         |
| cg10846682                          | RAMP1                   | 6.61E-05          | 6.61E-05             | 0.159666           | -6.26307                     | T down vs N                            | 28.537  | 31.5266   | 17.6761    | 1         |
| cg10848367                          | SCGB1D2                 | 0.00031847        | 0.000318472          | 0.318321           | -3.14149                     | T down vs N                            | 20.831  | 12.2728   | 9.42654    | 1         |
| cg10848828                          | TRIM40                  | 5.36E-06          | 5.36E-06             | 0.217798           | -4.59142                     | T down vs N                            | 44.527  | 21.759    | 7.81876    | 1         |
| cg10850215                          | HLA-DPB1                | 0.00503348        | 0.00503348           | 3.62163            | 3.62163                      | T up vs N                              | 10.555  | 15.512    | 23.5145    | 1         |
| cg10851763                          | UMODL1;UMODL1           | 5.13E-05          | 5.13E-05             | 0.308345           | -3.24312                     | T down vs N                            | 29.925  | 12.965    | 6.93195    | 1         |
| cg10852045                          | ADAM32                  | 0.00050945        | 0.000509446          | 0.293779           | -3.40391                     | T down vs N                            | 18.813  | 14.0534   | 11.9523    | 1         |

| Probeset ID                   | UCSC_REFGENE_NAME             | p-value<br>(Type) | p-value (T vs.<br>N) | Ratio (T<br>vs. N) | Fold-<br>Change (T<br>vs. N) | Fold-Change (T vs.<br>N) (Description) | F(Type) | SS (Type) | SS (Error) | F (Error) |
|-------------------------------|-------------------------------|-------------------|----------------------|--------------------|------------------------------|----------------------------------------|---------|-----------|------------|-----------|
| cg10854092                    | JAKMIP3                       | 5.56E-05          | 5.56E-05             | 0.201024           | -4.97453                     | T down vs N                            | 29.487  | 24.1073   | 13.0808    | 1         |
| cg10854441                    | MLC1;MLC1                     | 6.19E-05          | 6.19E-05             | 0.316398           | -3.16057                     | T down vs N                            | 28.891  | 12.403    | 6.86885    | 1         |
| cg10858353                    | KDR                           | 0.00246065        | 0.00246065           | 0.325508           | -3.07212                     | T down vs N                            | 12.874  | 11.7987   | 14.6636    | 1         |
| cg10858752                    | C12orf12                      | 0.00446928        | 0.00446928           | 0.311155           | -3.21384                     | T down vs N                            | 10.925  | 12.7659   | 18.6962    | 1         |
| cg10859442                    | UCP3;UCP3                     | 0.00027222        | 0.000272222          | 0.330902           | -3.02204                     | T down vs N                            | 21.533  | 11.4556   | 8.51218    | 1         |
| cg10861033                    | MXRA5                         | 0.00073549        | 0.000735491          | 0.190694           | -5.244                       | T down vs N                            | 17.318  | 25.7188   | 23.7619    | 1         |
| cg10864394                    | MMP3                          | 0.00146116        | 0.00146116           | 0.330392           | -3.02671                     | T down vs N                            | 14.706  | 11.4876   | 12.4981    | 1         |
| cg10864680                    | TNFSF13B;TNFSF13B             | 1.91E-05          | 1.91E-05             | 0.190409           | -5.25185                     | T down vs N                            | 35.797  | 25.7653   | 11.5163    | 1         |
| cg10868194                    | DLGAP2                        | 4.81E-05          | 4.81E-05             | 0.206812           | -4.83531                     | T down vs N                            | 30.292  | 23.2618   | 12.2867    | 1         |
| cg10872641                    | MTERF                         | 2.09E-05          | 2.09E-05             | 0.168863           | -5.92195                     | T down vs N                            | 35.243  | 29.6313   | 13.4524    | 1         |
| cg10873171                    | AEBP1                         | 3.05E-05          | 3.05E-05             | 0.244863           | -4.08391                     | T down vs N                            | 32.926  | 18.5432   | 9.01072    | 1         |
| cg10874111                    | LOC154822                     | 0.0003124         | 0.000312401          | 0.161483           | -6.19261                     | T down vs N                            | 20.916  | 31.139    | 23.8199    | 1         |
| cg10876767                    | SORCS2                        | 0.00146135        | 0.00146135           | 0.173337           | -5.7691                      | T down vs N                            | 14.706  | 28.7664   | 31.2979    | 1         |
| cg10878976                    | TERT;TERT                     | 0.00013575        | 0.000135747          | 0.238813           | -4.18738                     | T down vs N                            | 24.819  | 19.2085   | 12.3831    | 1         |
| cg10880006                    | PRDM8;PRDM8                   | 1.35E-05          | 1.35E-05             | 11.6577            | 11.6577                      | T up vs N                              | 38.051  | 56.4944   | 23.7555    | 1         |
| cg10880928                    | C9orf86;C9orf86               | 0.00137742        | 0.00137742           | 3.62512            | 3.62512                      | T up vs N                              | 14.922  | 15.5352   | 16.6577    | 1         |
| cg10881225                    | TAF1B                         | 0.00012733        | 0.000127328          | 0.161017           | -6.21052                     | T down vs N                            | 25.136  | 31.2377   | 19.8838    | 1         |
| cg10887810                    | TBX15                         | 0.00098144        | 0.000981442          | 0.317515           | -3.14946                     | T down vs N                            | 16.192  | 12.3272   | 12.1811    | 1         |
| cg10888202                    | MON1A;MON1A                   | 1.41E-05          | 1.41E-05             | 0.171088           | -5.84495                     | T down vs N                            | 37.745  | 29.1968   | 12.3764    | 1         |
| cg10898310                    | UBAC2;UBAC2;UBAC2             | 0.00012007        | 0.000120069          | 0.249096           | -4.01452                     | T down vs N                            | 25.429  | 18.0942   | 11.3848    | 1         |
| cg10902396                    | CHN2                          | 3.71E-05          | 3.71E-05             | 0.16783            | -5.95842                     | T down vs N                            | 31.771  | 29.8362   | 15.0254    | 1         |
| cg10904070                    | LPIN2                         | 1.14E-05          | 1.14E-05             | 0.270262           | -3.70011                     | T down vs N                            | 39.198  | 16.0331   | 6.5444     | 1         |
| cg10905180                    | ORS1E2                        | 0.00024547        | 0.00024547           | 0.135048           | -7.40478                     | T down vs N                            | 22.003  | 37.5443   | 27.3013    | 1         |
| cg10906810                    | RASA3                         | 0.0007998         | 0.000799801          | 0.309768           | -3.22822                     | T down vs N                            | 16.986  | 12.8637   | 12.1168    | 1         |
| cg10908116                    | COL4A1                        | 0.00176566        | 0.00176566           | 0.197358           | -5.06693                     | T down vs N                            | 14.026  | 24.6636   | 28.1341    | 1         |
| cg10911287                    | SCARB1;SCARB1                 | 4.88E-05          | 4.88E-05             | 3.82281            | 3.82281                      | T up vs N                              | 30.212  | 16.8426   | 8.91984    | 1         |
| cg10914467                    | STK19;STK19;DOM3Z;STK19       | 3.50E-05          | 3.50E-05             | 0.306756           | -3.25992                     | T down vs N                            | 32.118  | 13.0791   | 6.51547    | 1         |
| cg10914667                    | ORSA2                         | 4.06E-06          | 4.06E-06             | 0.169793           | -5.88951                     | T down vs N                            | 46.611  | 29.4485   | 10.1087    | 1         |
| cg10916651                    | C1QA                          | 1.51E-05          | 1.51E-05             | 0.256295           | -3.90175                     | T down vs N                            | 37.301  | 17.36     | 7.44642    | 1         |
| cg10916998                    | FLOT1;IER3                    | 0.00037199        | 0.000371985          | 6.57956            | 6.57956                      | T up vs N                              | 20.15   | 33.2436   | 26.3967    | 1         |
| PCDHGA4;PCDHGA6;PCDHGA9;PCDHG |                               |                   |                      |                    |                              |                                        |         |           |            |           |
| A1;PCDHGA8;PCDHGA5;PCDHGB1;PC |                               |                   |                      |                    |                              |                                        |         |           |            |           |
| cg10917547                    | DHGB4;PCDHGA3;PCDHGA10;PCDHGA | 0.00168525        | 0.00168525           | 3.1119             | 3.1119                       | T up vs N                              | 14.192  | 12.0707   | 13.6083    | 1         |
| cg10917602                    | HSD3B7;HSD3B7;HSD3B7          | 0.00111805        | 0.00111805           | 3.0119             | 3.0119                       | T up vs N                              | 15.697  | 11.3861   | 11.606     | 1         |
| cg10917941                    | HCG18;TRIM39;TRIM39;HCG18     | 5.38E-06          | 5.38E-06             | 0.181594           | -5.50679                     | T down vs N                            | 44.499  | 27.259    | 9.80132    | 1         |
| cg10917952                    | ORS6A5                        | 3.75E-06          | 3.75E-06             | 0.176406           | -5.66874                     | T down vs N                            | 47.225  | 28.1932   | 9.55203    | 1         |
| cg10919344                    | ORSA1                         | 5.30E-06          | 5.30E-06             | 0.16217            | -6.16635                     | T down vs N                            | 44.603  | 30.994    | 11.1181    | 1         |
| cg10919522                    | C14orf43;C14orf43             | 0.0012094         | 0.0012094            | 0.329951           | -3.03075                     | T down vs N                            | 15.403  | 11.5153   | 11.9619    | 1         |
| cg10923106                    | LOC100133991                  | 5.50E-06          | 5.50E-06             | 0.299498           | -3.33892                     | T down vs N                            | 44.33   | 13.6145   | 4.91384    | 1         |
| cg10925860                    | DGKA;DGKA;DGKA;DGKA           | 6.81E-05          | 6.81E-05             | 0.257509           | -3.88336                     | T down vs N                            | 28.379  | 17.2397   | 9.71987    | 1         |
| cg10928426                    | PRRT4                         | 0.00019628        | 0.000196275          | 0.315585           | -3.16872                     | T down vs N                            | 23.041  | 12.4585   | 8.65127    | 1         |
| cg10929921                    | FZD6;FZD6;FZD6                | 3.86E-08          | 3.86E-08             | 0.085429           | -11.7057                     | T down vs N                            | 95.224  | 56.6837   | 9.52432    | 1         |
| cg10930308                    | RNF39;RNF39                   | 0.00060191        | 0.00060191           | 6.18258            | 6.18258                      | T up vs N                              | 18.125  | 31.0837   | 27.4396    | 1         |
| cg10930366                    | MPP5                          | 0.00044321        | 0.000443207          | 3.24101            | 3.24101                      | T up vs N                              | 19.398  | 12.9507   | 10.6818    | 1         |
| cg10932907                    | TMEM45B                       | 4.64E-06          | 4.64E-06             | 0.296661           | -3.37085                     | T down vs N                            | 45.604  | 13.8303   | 4.85236    | 1         |
| cg10933691                    | MPP7                          | 9.49E-05          | 9.49E-05             | 0.141367           | -7.07377                     | T down vs N                            | 26.627  | 35.8488   | 21.5414    | 1         |
| cg10934807                    | RGPD8;RGPD5                   | 0.0001777         | 0.000177701          | 0.303278           | -3.29731                     | T down vs N                            | 23.512  | 13.3328   | 9.07284    | 1         |
| cg10942056                    | DISP1;DISP1                   | 7.07E-05          | 7.07E-05             | 0.31343            | -3.1905                      | T down vs N                            | 28.177  | 12.607    | 7.15879    | 1         |
| cg10945385                    | TRAPPC9;TRAPPC9               | 0.00150787        | 0.00150787           | 3.33385            | 3.33385                      | T up vs N                              | 14.592  | 13.5802   | 14.8904    | 1         |
| cg10945917                    | C1orf61                       | 9.99E-05          | 9.99E-05             | 0.197049           | -5.07487                     | T down vs N                            | 26.361  | 24.7113   | 14.999     | 1         |
| cg10946871                    | LUZP1;LUZP1                   | 0.00016001        | 0.000160011          | 0.203739           | -4.90825                     | T down vs N                            | 24.016  | 23.7059   | 15.7936    | 1         |
| cg10947827                    | CFLAR;CFLAR                   | 0.00596267        | 0.00596267           | 0.282972           | -3.53391                     | T down vs N                            | 10.038  | 14.9266   | 23.7929    | 1         |
| cg10948088                    | YPEL2                         | 0.00090001        | 0.000900014          | 3.88625            | 3.88625                      | T up vs N                              | 16.526  | 17.2586   | 16.7099    | 1         |
| cg10949319                    | MIR1307;USMG5                 | 5.14E-05          | 5.14E-05             | 0.066065           | -15.1366                     | T down vs N                            | 29.919  | 69.1478   | 36.9793    | 1         |
| cg10949583                    | FKBP7;FKBP7;PLEKHA3;MIR548N   | 0.0016824         | 0.0016824            | 6.31481            | 6.31481                      | T up vs N                              | 14.198  | 31.81     | 35.8467    | 1         |
| cg10949753                    | ITGB4;ITGB4;ITGB4             | 0.00399012        | 0.00399012           | 0.233339           | -4.28562                     | T down vs N                            | 11.283  | 19.8356   | 28.127     | 1         |
| cg10949880                    | RSU1;RSU1                     | 0.00031051        | 0.000310509          | 0.280749           | -3.5619                      | T down vs N                            | 20.943  | 15.1137   | 11.5464    | 1         |
| cg10950111                    | GJC2                          | 2.75E-05          | 2.75E-05             | 3.16281            | 3.16281                      | T up vs N                              | 33.561  | 12.4182   | 5.92031    | 1         |
| cg10950723                    | LY6G5C                        | 1.61E-05          | 1.61E-05             | 0.279846           | -3.57339                     | T down vs N                            | 36.887  | 15.1904   | 6.589      | 1         |
| cg10951120                    | KCNB1                         | 3.96E-05          | 3.96E-05             | 20.274             | 20.274                       | T up vs N                              | 31.406  | 84.8211   | 43.2121    | 1         |
| cg10954654                    | CTSS                          | 3.44E-05          | 3.44E-05             | 0.210413           | -4.75256                     | T down vs N                            | 32.213  | 22.755    | 11.3022    | 1         |
| cg10958002                    | TIMP4;SYN2;SYN2               | 0.00149845        | 0.00149845           | 0.283078           | -3.5326                      | T down vs N                            | 14.615  | 14.9178   | 16.3316    | 1         |
| cg10959651                    | RSAD2                         | 7.54E-08          | 7.54E-08             | 0.278368           | -3.59236                     | T down vs N                            | 86.37   | 15.317    | 2.83748    | 1         |
| cg10964388                    | NTN4                          | 6.36E-05          | 6.36E-05             | 0.238481           | -4.1932                      | T down vs N                            | 28.746  | 19.2458   | 10.7123    | 1         |
| cg10964421                    | TNFRSF10D                     | 0.00509724        | 0.00509724           | 6.82614            | 6.82614                      | T up vs N                              | 10.516  | 34.5547   | 52.5747    | 1         |
| cg10965131                    | WDR86                         | 5.18E-05          | 5.18E-05             | 5.19482            | 5.19482                      | T up vs N                              | 29.875  | 25.4272   | 13.618     | 1         |
| cg10966582                    | MST1P9                        | 1.79E-05          | 1.79E-05             | 9.81232            | 9.81232                      | T up vs N                              | 36.235  | 48.8446   | 21.5678    | 1         |
| cg10967176                    | TNXB;TNXB;TNXB                | 0.00089004        | 0.000890035          | 0.268116           | -3.72973                     | T down vs N                            | 16.569  | 16.2291   | 15.6721    | 1         |
| cg10968055                    | KCNH1;KCNH1                   | 9.87E-05          | 9.87E-05             | 0.153301           | -6.52313                     | T down vs N                            | 26.422  | 32.9403   | 19.9472    | 1         |
| cg10968631                    | FLJ44817                      | 0.00021468        | 0.00021468           | 0.258052           | -3.87518                     | T down vs N                            | 22.622  | 17.1862   | 12.1556    | 1         |
| cg10969919                    | TRPC7;TRPC7;TRPC7             | 1.54E-06          | 1.54E-06             | 0.199642           | -5.00896                     | T down vs N                            | 54.55   | 24.3151   | 7.13178    | 1         |



| Probeset ID | UCSC_REFGENE_NAME                                                                                         | p-value<br>(Type) | p-value (T vs.<br>N) | Ratio (T<br>vs. N) | Fold-<br>Change (T<br>vs. N) | Fold-Change (T vs.<br>N) (Description) | F(Type) | SS (Type) | SS (Error) | F (Error) |
|-------------|-----------------------------------------------------------------------------------------------------------|-------------------|----------------------|--------------------|------------------------------|----------------------------------------|---------|-----------|------------|-----------|
| cg11067786  | LOXL3;DOK1                                                                                                | 0.00010235        | 0.000102348          | 0.23256            | -4.29997                     | T down vs N                            | 26.238  | 19.9269   | 12.1515    | 1         |
| cg11068938  | TBCD                                                                                                      | 1.29E-05          | 1.29E-05             | 0.319078           | -3.13403                     | T down vs N                            | 38.337  | 12.2219   | 5.10076    | 1         |
| cg11070172  | CEBPE                                                                                                     | 0.00036091        | 0.000360906          | 0.102747           | -9.73269                     | T down vs N                            | 20.282  | 48.4966   | 38.2585    | 1         |
| cg11070193  | CATSPER4                                                                                                  | 0.00026425        | 0.00026425           | 4.05404            | 4.05404                      | T up vs N                              | 21.667  | 18.3502   | 13.5506    | 1         |
| cg11070419  | C4BPA                                                                                                     | 8.28E-07          | 8.28E-07             | 0.171663           | -5.82538                     | T down vs N                            | 60.139  | 29.086    | 7.7384     | 1         |
| cg11071207  | ALX3                                                                                                      | 0.00505889        | 0.00505889           | 5.95129            | 5.95129                      | T up vs N                              | 10.539  | 29.7962   | 45.2344    | 1         |
| cg11071448  | SYT2;SYT2                                                                                                 | 1.31E-05          | 1.31E-05             | 0.202724           | -4.93281                     | T down vs N                            | 38.233  | 23.8549   | 9.98285    | 1         |
| cg11071687  | SMYD3;SMYD3                                                                                               | 0.00295943        | 0.00295943           | 0.220472           | -4.53572                     | T down vs N                            | 12.255  | 21.4119   | 27.9561    | 1         |
| cg11072723  | ERP29;ERP29                                                                                               | 4.33E-05          | 4.33E-05             | 0.3016             | -3.31565                     | T down vs N                            | 30.883  | 13.457    | 6.9719     | 1         |
| cg11074047  | NFATC2;NFATC2;NFATC2                                                                                      | 4.93E-05          | 4.93E-05             | 0.23147            | -4.32021                     | T down vs N                            | 30.158  | 20.0554   | 10.6403    | 1         |
| cg11074192  | EDNRB;EDNRB;EDNRB                                                                                         | 0.00014559        | 0.000145585          | 0.294745           | -3.39276                     | T down vs N                            | 24.475  | 13.9782   | 9.13787    | 1         |
| cg11075316  | TRIM59                                                                                                    | 0.00238613        | 0.00238613           | 4.85788            | 4.85788                      | T up vs N                              | 12.979  | 23.3995   | 28.8468    | 1         |
| cg11075693  | FAM46A                                                                                                    | 0.00012032        | 0.000120317          | 0.154816           | -6.45928                     | T down vs N                            | 25.419  | 32.5957   | 20.5174    | 1         |
| cg11076181  | EIF2S1                                                                                                    | 0.00031508        | 0.000315075          | 0.214865           | -4.65409                     | T down vs N                            | 20.879  | 22.1478   | 16.9728    | 1         |
| cg11079711  | KRT26                                                                                                     | 8.31E-05          | 8.31E-05             | 0.281285           | -3.55511                     | T down vs N                            | 27.319  | 15.0683   | 8.82503    | 1         |
| cg11079936  | TRIM10;TRIM10                                                                                             | 0.00051211        | 0.000512111          | 0.229042           | -4.36601                     | T down vs N                            | 18.791  | 20.3455   | 17.3237    | 1         |
| cg11080915  | FCRL5                                                                                                     | 3.78E-05          | 3.78E-05             | 0.265905           | -3.76074                     | T down vs N                            | 31.664  | 16.4339   | 8.3042     | 1         |
| cg11081373  | TAC1;TAC1;TAC1;TAC1                                                                                       | 0.00225576        | 0.00225576           | 0.282578           | -3.53885                     | T down vs N                            | 13.171  | 14.9596   | 18.1728    | 1         |
| cg11082691  | TNFRSF19;TNFRSF19                                                                                         | 0.00702264        | 0.00702264           | 0.273063           | -3.66215                     | T down vs N                            | 9.5493  | 15.7814   | 26.442     | 1         |
| cg11085454  | HOBX3                                                                                                     | 0.00021175        | 0.000211752          | 4.13687            | 4.13687                      | T up vs N                              | 22.686  | 18.8843   | 13.319     | 1         |
| cg11086066  | NFATC2;NFATC2;NFATC2                                                                                      | 0.00383066        | 0.00383066           | 4.0656             | 4.0656                       | T up vs N                              | 11.414  | 18.4249   | 25.8285    | 1         |
| cg11086378  | AOX2P                                                                                                     | 2.29E-07          | 2.29E-07             | 0.22496            | -4.44524                     | T down vs N                            | 73.236  | 20.845    | 5.5405     | 1         |
| cg11086764  | NR2E1                                                                                                     | 3.51E-05          | 3.51E-05             | 0.093432           | -10.703                      | T down vs N                            | 32.106  | 52.6322   | 26.2296    | 1         |
| cg11087660  | CABLES2                                                                                                   | 1.18E-05          | 1.18E-05             | 0.310176           | -3.22397                     | T down vs N                            | 38.945  | 12.8348   | 5.27298    | 1         |
| cg11088051  | SLC25A3;SLC25A3;SLC25A3                                                                                   | 8.92E-05          | 8.92E-05             | 0.2261             | -4.42281                     | T down vs N                            | 26.945  | 20.7039   | 12.2941    | 1         |
| cg11088471  | SIM2;SIM2                                                                                                 | 0.0002962         | 0.000296198          | 0.312653           | -3.19843                     | T down vs N                            | 21.153  | 12.661    | 9.5765     | 1         |
| cg11088682  | NCEH1;NCEH1;NCEH1;NCEH1<br>SNORD115-29;SNORD115-                                                          | 1.67E-05          | 1.67E-05             | 0.237011           | -4.21922                     | T down vs N                            | 36.678  | 19.4122   | 8.46811    | 1         |
| cg11089364  | 11;SNORD115-43;SNORD115-36                                                                                | 1.44E-05          | 1.44E-05             | 0.160858           | -6.21666                     | T down vs N                            | 37.612  | 31.2715   | 13.3029    | 1         |
| cg11092487  | MYH7B                                                                                                     | 3.90E-06          | 3.90E-06             | 13.6126            | 13.6126                      | T up vs N                              | 46.927  | 63.8518   | 21.7708    | 1         |
| cg11093762  | C7orf20                                                                                                   | 2.57E-05          | 2.57E-05             | 0.23156            | -4.31853                     | T down vs N                            | 33.963  | 20.0447   | 9.4431     | 1         |
| cg11095383  | PCDHA1;PCDHA1;PCDHA2;PCDHA2                                                                               | 4.03E-05          | 4.03E-05             | 6.3032             | 6.3032                       | T up vs N                              | 31.299  | 31.7465   | 16.2289    | 1         |
| cg11097249  | ODZ2                                                                                                      | 0.00019476        | 0.000194761          | 0.305118           | -3.27742                     | T down vs N                            | 23.078  | 13.1979   | 9.1502     | 1         |
| cg11099006  | NPB                                                                                                       | 0.00666144        | 0.00666144           | 6.45292            | 6.45292                      | T up vs N                              | 9.7057  | 32.5613   | 53.6777    | 1         |
| cg11099684  | RBPJ;RBPJ;RBPJ;RBPJ                                                                                       | 0.00215655        | 0.00215655           | 0.310106           | -3.22471                     | T down vs N                            | 13.326  | 12.8398   | 15.4163    | 1         |
| cg11099722  | ALDH1A3<br>PCDHGA4;PCDHGA6;PCDHGA1;PCDHG<br>A8;PCDHGA5;PCDHGB1;PCDHGB4;PC<br>DHGA3;PCDHGA2;PCDHGA9;PCDHGA | 0.00028996        | 0.000289957          | 0.194381           | -5.14454                     | T down vs N                            | 21.249  | 25.1278   | 18.9209    | 1         |
| cg11100804  | 7                                                                                                         | 0.00035368        | 0.00035368           | 5.75698            | 5.75698                      | T up vs N                              | 20.37   | 28.6974   | 22.541     | 1         |
| cg11102858  | ARSG;ARSG                                                                                                 | 0.00078919        | 0.000789189          | 0.196929           | -5.07797                     | T down vs N                            | 17.039  | 24.7299   | 23.2222    | 1         |
| cg11104088  | TAF3                                                                                                      | 0.00069964        | 0.000699643          | 8.94745            | 8.94745                      | T up vs N                              | 17.517  | 44.9772   | 41.0823    | 1         |
| cg11106060  | TRPV1;TRPV1;TRPV1                                                                                         | 0.00455357        | 0.00455357           | 0.298899           | -3.34561                     | T down vs N                            | 10.866  | 13.6597   | 20.1131    | 1         |
| cg11109845  | CUL1                                                                                                      | 0.00030805        | 0.00030805           | 0.241168           | -4.14649                     | T down vs N                            | 20.979  | 18.9461   | 14.4499    | 1         |
| cg11111460  | MGC45800                                                                                                  | 8.58E-05          | 8.58E-05             | 12.8971            | 12.8971                      | T up vs N                              | 27.147  | 61.2383   | 36.0923    | 1         |
| cg11112729  | ZNF212                                                                                                    | 9.71E-06          | 9.71E-06             | 0.239016           | -4.18382                     | T down vs N                            | 40.268  | 19.1857   | 7.62312    | 1         |
| cg11113534  | C20orf70                                                                                                  | 0.00045748        | 0.000457478          | 0.305499           | -3.27333                     | T down vs N                            | 19.264  | 13.1702   | 10.9385    | 1         |
| cg11115405  | FLJ25758                                                                                                  | 0.00011928        | 0.000119284          | 0.279232           | -3.58125                     | T down vs N                            | 25.462  | 15.2429   | 9.57836    | 1         |
| cg11116035  | HOMER1                                                                                                    | 0.00174471        | 0.00174471           | 0.223861           | -4.46707                     | T down vs N                            | 14.069  | 20.9821   | 23.8624    | 1         |
| cg11117177  | CHST11                                                                                                    | 7.85E-06          | 7.85E-06             | 0.253872           | -3.939                       | T down vs N                            | 41.753  | 17.6031   | 6.74555    | 1         |
| cg11118171  | DPCR1                                                                                                     | 0.00156936        | 0.00156936           | 3.05803            | 3.05803                      | T up vs N                              | 14.448  | 11.7022   | 12.9595    | 1         |
| cg11118413  | C3orf27                                                                                                   | 1.58E-05          | 1.58E-05             | 0.317483           | -3.14978                     | T down vs N                            | 37.034  | 12.3293   | 5.32676    | 1         |
| cg11120194  | FLT4;FLT4                                                                                                 | 0.00109887        | 0.00109887           | 0.333133           | -3.00181                     | T down vs N                            | 15.762  | 11.3169   | 11.4877    | 1         |
| cg11120551  | CHD1L                                                                                                     | 0.00094685        | 0.000946852          | 0.317664           | -3.14798                     | T down vs N                            | 16.33   | 12.3171   | 12.0685    | 1         |
| cg11120695  | IQCF5                                                                                                     | 3.51E-06          | 3.51E-06             | 0.324163           | -3.08487                     | T down vs N                            | 47.747  | 11.8859   | 3.98292    | 1         |
| cg11122968  | CD33;CD33                                                                                                 | 4.64E-06          | 4.64E-06             | 0.254225           | -3.93352                     | T down vs N                            | 45.596  | 17.5674   | 6.16459    | 1         |
| cg11123018  | SCGN                                                                                                      | 0.00016355        | 0.000163551          | 0.188232           | -5.3126                      | T down vs N                            | 23.91   | 26.1238   | 17.4813    | 1         |
| cg11123493  | CSorf13;CSorf13                                                                                           | 0.0001706         | 0.000170602          | 0.321884           | -3.10671                     | T down vs N                            | 23.707  | 12.0352   | 8.12253    | 1         |
| cg11123744  | SLC6A19                                                                                                   | 0.00400123        | 0.00400123           | 0.312418           | -3.20084                     | T down vs N                            | 11.275  | 12.6774   | 17.9908    | 1         |
| cg11124080  | EMX2OS                                                                                                    | 0.0001142         | 0.000114202          | 0.174754           | -5.72233                     | T down vs N                            | 25.681  | 28.4998   | 17.756     | 1         |
| cg11125805  | SLC36A3;SLC36A3                                                                                           | 3.04E-08          | 3.04E-08             | 0.209856           | -4.76517                     | T down vs N                            | 98.559  | 22.8325   | 3.70661    | 1         |
| cg11126134  | C13orf33                                                                                                  | 0.00155273        | 0.00155273           | 3.86795            | 3.86795                      | T up vs N                              | 14.486  | 17.1388   | 18.9299    | 1         |
| cg11128045  | PNPLA7;PNPLA7                                                                                             | 0.00017387        | 0.000173873          | 0.287597           | -3.47709                     | T down vs N                            | 23.616  | 14.5457   | 9.85467    | 1         |
| cg11131532  | KCNB1                                                                                                     | 0.00119912        | 0.00119912           | 25.3096            | 25.3096                      | T up vs N                              | 15.435  | 97.7878   | 101.371    | 1         |
| cg11131549  | TRAF5;TRAF5                                                                                               | 3.71E-07          | 3.71E-07             | 0.19827            | -5.04362                     | T down vs N                            | 68.069  | 24.5237   | 5.76444    | 1         |
| cg11131599  | PLEKHA6                                                                                                   | 2.09E-05          | 2.09E-05             | 0.284869           | -3.51039                     | T down vs N                            | 35.25   | 14.769    | 6.70371    | 1         |
| cg11133730  | RHOBTB3                                                                                                   | 0.00010882        | 0.000108824          | 0.311873           | -3.20643                     | T down vs N                            | 25.925  | 12.7154   | 7.84741    | 1         |
| cg11136592  | AKR1C4                                                                                                    | 8.42E-05          | 8.42E-05             | 0.125427           | -7.97279                     | T down vs N                            | 28.401  | 37.9928   | 20.0657    | 1         |
| cg11137145  | KPRP                                                                                                      | 0.000143          | 0.000143             | 0.285377           | -3.50414                     | T down vs N                            | 24.563  | 14.7271   | 9.5931     | 1         |
| cg11138095  | MLNR                                                                                                      | 0.00287496        | 0.00287496           | 3.56869            | 3.56869                      | T up vs N                              | 12.351  | 15.1591   | 19.638     | 1         |
| cg11139090  | UNC5A                                                                                                     | 1.53E-05          | 1.53E-05             | 0.141833           | -7.05053                     | T down vs N                            | 37.21   | 35.7283   | 15.3627    | 1         |

| Probeset ID                      | UCSC_REFGENE_NAME            | p-value<br>(Type) | p-value (T vs.<br>N) | Ratio (T<br>vs. N) | Fold-<br>Change (T<br>vs. N) | Fold-Change (T vs.<br>N) (Description) | F(Type) | SS (Type) | SS (Error) | F (Error) |
|----------------------------------|------------------------------|-------------------|----------------------|--------------------|------------------------------|----------------------------------------|---------|-----------|------------|-----------|
| cg11139646                       | BMP8B                        | 0.00658548        | 0.00658548           | 5.43166            | 5.43166                      | T up vs N                              | 9.7398  | 26.8218   | 44.0612    | 1         |
| cg11140838                       | SECTM1                       | 0.00338776        | 0.00338776           | 3.36302            | 3.36302                      | T up vs N                              | 11.811  | 13.7774   | 18.6646    | 1         |
| cg11142617                       | MORN1;RER1                   | 2.19E-05          | 2.19E-05             | 0.30983            | -3.22758                     | T down vs N                            | 34.934  | 12.8593   | 5.88971    | 1         |
| cg11143486                       | C1orf170                     | 0.00012461        | 0.000124612          | 0.220397           | -4.53726                     | T down vs N                            | 25.244  | 21.4216   | 13.5775    | 1         |
| cg11147193                       | HPCAL1                       | 0.00285647        | 0.00285647           | 0.300892           | -3.32346                     | T down vs N                            | 12.372  | 13.5099   | 17.4712    | 1         |
| cg11148246                       | DYNC1I1;DYNC1I1;DYNC1I1      | 3.66E-05          | 3.66E-05             | 0.202459           | -4.93927                     | T down vs N                            | 31.862  | 23.894    | 11.9988    | 1         |
| cg11150797                       | SKAP1;SKAP1                  | 0.00012579        | 0.000125793          | 0.191358           | -5.2258                      | T down vs N                            | 25.197  | 25.611    | 16.2632    | 1         |
| cg11153485                       | IRS2                         | 0.00445973        | 0.00445973           | 0.325899           | -3.06844                     | T down vs N                            | 10.932  | 11.7734   | 17.2321    | 1         |
| cg11155489                       | CCL11                        | 5.36E-05          | 5.36E-05             | 0.160513           | -6.23003                     | T down vs N                            | 29.687  | 31.3451   | 16.8935    | 1         |
| cg11157816                       | OLFML3                       | 0.00034597        | 0.000345972          | 0.308138           | -3.2453                      | T down vs N                            | 20.466  | 12.9798   | 10.1473    | 1         |
| cg11158819                       | HTR3E                        | 9.33E-06          | 9.33E-06             | 0.223412           | -4.47604                     | T down vs N                            | 40.549  | 21.0385   | 8.30137    | 1         |
| cg11161417                       | SPACA3                       | 5.92E-07          | 5.92E-07             | 0.220661           | -4.53185                     | T down vs N                            | 63.358  | 21.3877   | 5.40114    | 1         |
| cg11165158                       | FOXL1                        | 0.00281833        | 0.00281833           | 10.1653            | 10.1653                      | T up vs N                              | 12.417  | 50.3682   | 64.9019    | 1         |
| cg11165254                       | ERC2                         | 7.36E-05          | 7.36E-05             | 0.170776           | -5.85562                     | T down vs N                            | 27.959  | 29.2572   | 16.7427    | 1         |
| cg11168433                       | KCNQ4;KCNQ4                  | 0.00011481        | 0.000114805          | 3.48114            | 3.48114                      | T up vs N                              | 25.655  | 14.5728   | 9.08861    | 1         |
| cg11170393                       | DUSP22                       | 7.81E-06          | 7.81E-06             | 0.296102           | -3.37722                     | T down vs N                            | 41.793  | 13.8733   | 5.31131    | 1         |
| cg11171825                       | PEX6                         | 2.14E-05          | 2.14E-05             | 0.217118           | -4.6058                      | T down vs N                            | 35.102  | 21.8484   | 9.95873    | 1         |
| cg11173131                       | C20orf123                    | 0.00016585        | 0.000165852          | 0.272302           | -3.6724                      | T down vs N                            | 23.843  | 15.8494   | 10.6359    | 1         |
| cg11174769                       | RPL31P11                     | 0.00056311        | 0.000563112          | 0.287968           | -3.47261                     | T down vs N                            | 18.398  | 14.5156   | 12.6237    | 1         |
| cg11174855                       | NXK6-2                       | 5.35E-05          | 5.35E-05             | 55.9037            | 55.9037                      | T up vs N                              | 29.692  | 151.634   | 81.711     | 1         |
| cg11176525                       | ZDHHC3;ZDHHC3;ZDHHC3         | 0.00323975        | 0.00323975           | 3.2689             | 3.2689                       | T up vs N                              | 11.956  | 13.1401   | 17.584     | 1         |
| cg11176990                       | LOC375196;LOC100271715       | 7.19E-05          | 7.19E-05             | 27.0089            | 27.0089                      | T up vs N                              | 28.082  | 101.761   | 57.9786    | 1         |
| cg11177526                       | PYHIN1;PYHIN1;PYHIN1;PYHIN1  | 1.97E-06          | 1.97E-06             | 0.12457            | -8.02761                     | T down vs N                            | 52.427  | 40.6343   | 12.4011    | 1         |
| KIAA0652;KIAA0652;HARBI1;KIAA065 |                              |                   |                      |                    |                              |                                        |         |           |            |           |
| cg11178136                       | 2;KIAA0652;KIAA0652          | 0.00037212        | 0.000372124          | 0.206294           | -4.84745                     | T down vs N                            | 20.149  | 23.3359   | 18.5311    | 1         |
| cg11179081                       | HIST1H2BK                    | 0.00159051        | 0.00159051           | 0.240673           | -4.15502                     | T down vs N                            | 14.4    | 19.001    | 21.1128    | 1         |
| cg11179695                       | ARHGAP18                     | 1.56E-05          | 1.56E-05             | 0.201474           | -4.96343                     | T down vs N                            | 37.121  | 24.0403   | 10.3618    | 1         |
| cg11181763                       | EBF1                         | 2.18E-05          | 2.18E-05             | 0.261702           | -3.82114                     | T down vs N                            | 34.975  | 16.8317   | 7.69998    | 1         |
| cg11182225                       | TAC1;TAC1;TAC1;TAC1          | 2.94E-05          | 2.94E-05             | 0.285793           | -3.49903                     | T down vs N                            | 33.157  | 14.6929   | 7.09007    | 1         |
| cg11183307                       | SCRT2                        | 2.17E-05          | 2.17E-05             | 0.315467           | -3.1699                      | T down vs N                            | 34.999  | 12.4666   | 5.69912    | 1         |
| cg11185549                       | MAP1LC3B2                    | 0.00030874        | 0.000308736          | 0.297015           | -3.36684                     | T down vs N                            | 20.969  | 13.8032   | 10.5324    | 1         |
| cg11186155                       | LEFTY1                       | 5.61E-05          | 5.61E-05             | 0.222894           | -4.48645                     | T down vs N                            | 29.435  | 21.1037   | 11.4713    | 1         |
| cg11188031                       | HAVCR1;HAVCR1                | 3.57E-06          | 3.57E-06             | 0.315657           | -3.168                       | T down vs N                            | 47.608  | 12.4536   | 4.18535    | 1         |
| cg11189107                       | CTSG                         | 1.60E-05          | 1.60E-05             | 0.301093           | -3.32123                     | T down vs N                            | 36.956  | 13.4948   | 5.8426     | 1         |
| cg11189257                       | CPVL;CPVL                    | 0.00019514        | 0.000195144          | 0.332826           | -3.00457                     | T down vs N                            | 23.069  | 11.3359   | 7.86241    | 1         |
| cg11192688                       | FMO1                         | 0.00034188        | 0.000341882          | 0.308617           | -3.24026                     | T down vs N                            | 20.518  | 12.9455   | 10.0948    | 1         |
| cg11195065                       | EMX2OS                       | 0.00053177        | 0.000531768          | 0.210018           | -4.7615                      | T down vs N                            | 18.634  | 22.8099   | 19.5852    | 1         |
| cg11200042                       | C10orf84;C10orf84            | 6.24E-05          | 6.24E-05             | 4.06773            | 4.06773                      | T up vs N                              | 28.848  | 18.4387   | 10.2267    | 1         |
| cg11200930                       | CAND2;CAND2                  | 0.00144198        | 0.00144198           | 0.319545           | -3.12945                     | T down vs N                            | 14.754  | 12.1906   | 13.2197    | 1         |
| cg11201288                       | LRRC40;SFRS11                | 2.24E-05          | 2.24E-05             | 0.274121           | -3.64802                     | T down vs N                            | 34.801  | 15.6875   | 7.21246    | 1         |
| cg11201401                       | SLC6A7                       | 5.02E-06          | 5.02E-06             | 3.60724            | 3.60724                      | T up vs N                              | 45.01   | 15.4162   | 5.48008    | 1         |
| cg11201447                       | MIR1204;PVT1                 | 1.02E-06          | 1.02E-06             | 0.0628             | -15.9236                     | T down vs N                            | 58.255  | 71.7517   | 19.7071    | 1         |
| cg11201710                       | FGF12                        | 9.19E-06          | 9.19E-06             | 16.7546            | 16.7546                      | T up vs N                              | 40.656  | 74.4132   | 29.2854    | 1         |
| cg11202131                       | LOC001463                    | 0.001551          | 0.001551             | 0.273022           | -3.66271                     | T down vs N                            | 14.49   | 15.7851   | 17.4298    | 1         |
| cg11202265                       | PTPRN2;PTPRN2;PTPRN2         | 0.00043934        | 0.000439342          | 3.09726            | 3.09726                      | T up vs N                              | 19.436  | 11.9706   | 9.85457    | 1         |
| cg11203985                       | CPNE7;CPNE7                  | 0.0007388         | 0.000738804          | 3.43378            | 3.43378                      | T up vs N                              | 17.3    | 14.2545   | 13.1835    | 1         |
| cg11204562                       | C10orf81                     | 5.87E-07          | 5.87E-07             | 0.114401           | -8.74117                     | T down vs N                            | 63.438  | 44.0248   | 11.1036    | 1         |
| cg11206824                       | SNORD115-16                  | 0.00152302        | 0.00152302           | 0.236014           | -4.23703                     | T down vs N                            | 14.556  | 19.526    | 21.4631    | 1         |
| cg11207307                       | SLC2A14                      | 0.00249203        | 0.00249203           | 3.29552            | 3.29552                      | T up vs N                              | 12.831  | 13.3207   | 16.6106    | 1         |
| cg11207515                       | CNTNAP2                      | 0.00032821        | 0.000328206          | 0.21572            | -4.63564                     | T down vs N                            | 20.698  | 22.0336   | 17.0325    | 1         |
| cg11209481                       | C8orf79                      | 1.63E-07          | 1.63E-07             | 0.317699           | -3.14764                     | T down vs N                            | 77.091  | 12.3147   | 2.55589    | 1         |
| cg11211563                       | GEFT;GEFT                    | 0.00041952        | 0.000419521          | 3.85276            | 3.85276                      | T up vs N                              | 19.632  | 17.0393   | 13.8867    | 1         |
| cg11212178                       | MIR492                       | 0.00726626        | 0.00726626           | 0.328877           | -3.04065                     | T down vs N                            | 9.4489  | 11.5832   | 19.614     | 1         |
| cg11212237                       | FRK;LOC728402                | 0.00131253        | 0.00131253           | 0.282682           | -3.53754                     | T down vs N                            | 15.099  | 14.9508   | 15.8427    | 1         |
| cg11212589                       | ZBP2;ZBP2                    | 0.00025973        | 0.000259733          | 0.236902           | -4.22115                     | T down vs N                            | 21.745  | 19.4246   | 14.2924    | 1         |
| cg11213091                       | FAM20C                       | 0.00010235        | 0.000102345          | 0.317023           | -3.15434                     | T down vs N                            | 26.238  | 12.3605   | 7.53743    | 1         |
| cg11213574                       | TRABD                        | 6.05E-06          | 6.05E-06             | 34.5491            | 34.5491                      | T up vs N                              | 43.626  | 117.531   | 43.105     | 1         |
| cg11214047                       | SAMD9L                       | 0.00043587        | 0.000435872          | 0.326872           | -3.0593                      | T down vs N                            | 19.469  | 11.7109   | 9.62406    | 1         |
| cg11214962                       | MPZ                          | 4.13E-06          | 4.13E-06             | 0.106085           | -9.42639                     | T down vs N                            | 46.491  | 47.1432   | 16.2244    | 1         |
| cg11217865                       | NRG2;NRG2;NRG2;NRG2          | 0.00285548        | 0.00285548           | 0.278021           | -3.59685                     | T down vs N                            | 12.373  | 15.3469   | 19.845     | 1         |
| cg11218842                       | UCN3                         | 2.34E-06          | 2.34E-06             | 0.313458           | -3.19022                     | T down vs N                            | 51.009  | 12.6051   | 3.95383    | 1         |
| cg11219400                       | TRANK1                       | 9.87E-06          | 9.87E-06             | 0.086607           | -11.5465                     | T down vs N                            | 40.16   | 56.0543   | 22.3323    | 1         |
| cg11221524                       | NGS5                         | 0.00168519        | 0.00168519           | 0.266456           | -3.75296                     | T down vs N                            | 14.192  | 16.3826   | 18.4692    | 1         |
| cg11224362                       | PABPC4;PABPC4;PABPC4         | 0.0007916         | 0.0007916            | 4.58621            | 4.58621                      | T up vs N                              | 38.803  | 9.05275   | 1.39981    | 1         |
| PRAME;PRAME;PRAME;PRAME;LOC64    |                              |                   |                      |                    |                              |                                        |         |           |            |           |
| cg11225751                       | 8691;PRAME;PRAME;PRAME;PRAME | 0.00082262        | 0.000822617          | 0.19422            | -5.1488                      | T down vs N                            | 16.876  | 25.1533   | 23.848     | 1         |
| cg11228250                       | PLA2R1;PLA2R1                | 3.27E-05          | 3.27E-05             | 8.74517            | 8.74517                      | T up vs N                              | 32.509  | 44.0434   | 21.6767    | 1         |
| cg11228758                       | LEPR;LEPR;LEPR               | 0.0001683         | 0.000168299          | 0.31123            | -3.21306                     | T down vs N                            | 23.773  | 12.7605   | 8.58844    | 1         |
| cg11229273                       | ARHGFE3                      | 0.00500767        | 0.00500767           | 0.311709           | -3.20812                     | T down vs N                            | 10.571  | 12.7269   | 19.2637    | 1         |
| cg11230471                       | SLFN12                       | 1.04E-05          | 1.04E-05             | 0.133105           | -7.51285                     | T down vs N                            | 39.814  | 38.0897   | 15.3072    | 1         |
| cg11231100                       | HEPHL1                       | 7.52E-05          | 7.52E-05             | 0.260533           | -3.83829                     | T down vs N                            | 27.846  | 16.9443   | 9.73596    | 1         |

| Probeset ID                                                      | UCSC_REFGENE_NAME            | p-value<br>(Type) | p-value (T vs.<br>N) | Ratio (T<br>vs. N) | Fold-<br>Change (T<br>vs. N) | Fold-Change (T vs.<br>N) (Description) | F(Type) | SS (Type) | SS (Error) | F (Error) |
|------------------------------------------------------------------|------------------------------|-------------------|----------------------|--------------------|------------------------------|----------------------------------------|---------|-----------|------------|-----------|
| cg11231701                                                       | CDK5RAP1;CDK5RAP1            | 9.54E-05          | 9.54E-05             | 0.32925            | -3.0372                      | T down vs N                            | 26.6    | 11.5595   | 6.95309    | 1         |
| cg11232054                                                       | CUL4A;CUL4A                  | 1.73E-05          | 1.73E-05             | 0.2742             | -3.64697                     | T down vs N                            | 36.429  | 15.6805   | 6.88704    | 1         |
| cg11234429                                                       | SLC6A3                       | 8.56E-05          | 8.56E-05             | 0.331792           | -3.01394                     | T down vs N                            | 27.163  | 11.4001   | 6.71508    | 1         |
| cg11237207                                                       | PYHIN1;PYHIN1;PYHIN1;PYHIN1  | 0.00161038        | 0.00161038           | 0.297372           | -3.36279                     | T down vs N                            | 14.355  | 13.7759   | 15.3546    | 1         |
| cg11237951                                                       | BRD9;BRD9;BRD9               | 0.00115785        | 0.00115785           | 3.03876            | 3.03876                      | T up vs N                              | 15.566  | 11.5702   | 11.8932    | 1         |
| cg11239749                                                       | HLA-DOB                      | 4.07E-06          | 4.07E-06             | 0.180141           | -5.55121                     | T down vs N                            | 46.592  | 27.5164   | 9.44927    | 1         |
| cg11241750                                                       | GRAMD3                       | 0.00295356        | 0.00295356           | 0.325619           | -3.07107                     | T down vs N                            | 12.261  | 11.7915   | 15.3871    | 1         |
| cg11243251                                                       | PNPLA1;PNPLA1                | 2.04E-05          | 2.04E-05             | 0.190576           | -5.24726                     | T down vs N                            | 35.393  | 25.7381   | 11.6352    | 1         |
| cg11245181                                                       | ZC3H12D                      | 3.78E-06          | 3.78E-06             | 4.94176            | 4.94176                      | T up vs N                              | 47.168  | 23.9091   | 8.11035    | 1         |
| cg11247615                                                       | MUC6                         | 1.27E-05          | 1.27E-05             | 0.157859           | -6.33475                     | T down vs N                            | 38.472  | 31.919    | 13.2745    | 1         |
| cg11248189                                                       | UBAP2L                       | 6.71E-05          | 6.71E-05             | 0.172856           | -5.78517                     | T down vs N                            | 28.459  | 28.8578   | 16.2241    | 1         |
| cg11251554                                                       | MIR518B                      | 3.05E-05          | 3.05E-05             | 0.277516           | -3.6034                      | T down vs N                            | 32.93   | 15.3906   | 7.47801    | 1         |
| cg11251827                                                       | HSPA6                        | 0.00036616        | 0.000366155          | 0.153609           | -6.51004                     | T down vs N                            | 20.219  | 32.8698   | 26.0113    | 1         |
| cg11254726                                                       | PIK3C2B                      | 0.00061879        | 0.00061879           | 3.94149            | 3.94149                      | T up vs N                              | 18.012  | 17.6194   | 15.651     | 1         |
| cg11255590                                                       | ABR;ABR;ABR                  | 0.00069814        | 0.000698144          | 0.290269           | -3.44508                     | T down vs N                            | 17.526  | 14.3306   | 13.0831    | 1         |
| cg11257429                                                       | COL23A1                      | 0.00647361        | 0.00647361           | 3.89818            | 3.89818                      | T up vs N                              | 9.7909  | 17.3367   | 28.331     | 1         |
| cg11258404                                                       | F2RL1                        | 0.00028801        | 0.000288013          | 3.53137            | 3.53137                      | T up vs N                              | 21.279  | 14.9095   | 11.2108    | 1         |
| cg11259937                                                       | SLC47A2;SLC47A2              | 3.19E-05          | 3.19E-05             | 0.224952           | -4.44539                     | T down vs N                            | 32.657  | 20.846    | 10.2134    | 1         |
| cg11260046                                                       | MEI1;MEI1                    | 0.00151125        | 0.00151125           | 4.9094             | 4.9094                       | T up vs N                              | 14.584  | 23.7129   | 26.0153    | 1         |
| cg11261691                                                       | KIF3B                        | 0.00013742        | 0.000137416          | 0.317291           | -3.15168                     | T down vs N                            | 24.759  | 12.3423   | 7.97607    | 1         |
| cg11264635                                                       | SLC1A6                       | 0.00086447        | 0.000864471          | 0.284697           | -3.51251                     | T down vs N                            | 16.682  | 14.7832   | 14.1789    | 1         |
| cg11264863                                                       | SEMG1;SEMG1                  | 0.00086079        | 0.000860792          | 0.205071           | -4.87636                     | T down vs N                            | 16.699  | 23.5121   | 22.5285    | 1         |
| cg11267114                                                       | RSPH6A                       | 2.08E-05          | 2.08E-05             | 0.221821           | -4.50813                     | T down vs N                            | 35.26   | 21.2395   | 9.63777    | 1         |
| cg11267390                                                       | TRPM2                        | 0.00023547        | 0.000235469          | 0.279794           | -3.57405                     | T down vs N                            | 22.194  | 15.1948   | 10.9543    | 1         |
| cg11267802                                                       | SPRR2G                       | 1.77E-05          | 1.77E-05             | 0.133124           | -7.51182                     | T down vs N                            | 36.294  | 38.0845   | 16.7894    | 1         |
| cg11267879                                                       | CYP2F1                       | 2.32E-05          | 2.32E-05             | 0.254303           | -3.93232                     | T down vs N                            | 34.601  | 17.5596   | 8.11991    | 1         |
| PCDHA7;PCDHA13;PCDHA12;PCDHA6;<br>PCDHA10;PCDHA4;PCDHA11;PCDHA8; |                              |                   |                      |                    |                              |                                        |         |           |            |           |
| cg11268983                                                       | PCDHA1;PCDHA2;PCDHA6;PCDHA1  | 0.00014233        | 0.000142333          | 11.2132            | 11.2132                      | T up vs N                              | 24.586  | 54.7201   | 35.6108    | 1         |
| cg11270895                                                       | JSRP1                        | 2.44E-05          | 2.44E-05             | 0.212273           | -4.71091                     | T down vs N                            | 35.991  | 21.1753   | 8.82529    | 1         |
| cg11271171                                                       | MCTP1;MCTP1                  | 0.00013146        | 0.000131455          | 0.239478           | -4.17576                     | T down vs N                            | 24.978  | 19.134    | 12.2566    | 1         |
| cg11271593                                                       | RPS11;SNORD35B               | 0.00062767        | 0.000627674          | 0.23936            | -4.17781                     | T down vs N                            | 17.954  | 19.1472   | 17.063     | 1         |
| cg11271605                                                       | STEAP4                       | 0.00111972        | 0.00111972           | 3.03297            | 3.03297                      | T up vs N                              | 15.691  | 11.5305   | 11.7574    | 1         |
| cg11273176                                                       | KCNK3                        | 1.51E-06          | 1.51E-06             | 0.258021           | -3.87566                     | T down vs N                            | 54.715  | 17.1893   | 5.02654    | 1         |
| cg11273947                                                       | LBXCOR1                      | 0.00034037        | 0.000340368          | 5.95916            | 5.95916                      | T up vs N                              | 20.538  | 29.8403   | 23.2471    | 1         |
| cg11274371                                                       | CDK6                         | 2.00E-07          | 2.00E-07             | 0.291751           | -3.42758                     | T down vs N                            | 74.722  | 14.2128   | 3.04336    | 1         |
| cg11275630                                                       | SLC8A2                       | 0.00014182        | 0.000141822          | 5.26342            | 5.26342                      | T up vs N                              | 24.604  | 25.8337   | 16.8       | 1         |
| cg11277156                                                       | MRPS22                       | 3.65E-05          | 3.65E-05             | 0.257136           | -3.88899                     | T down vs N                            | 31.865  | 17.2765   | 8.6749     | 1         |
| cg11279151                                                       | RG9MTD1                      | 0.00017727        | 0.000177265          | 0.185181           | -5.40012                     | T down vs N                            | 23.524  | 26.6375   | 18.1176    | 1         |
| cg11282353                                                       | SLCO2A1                      | 4.97E-05          | 4.97E-05             | 0.2653             | -3.76932                     | T down vs N                            | 30.109  | 16.4906   | 8.763      | 1         |
| cg11282676                                                       | HIST1H1A;HIST1H1A            | 0.00257856        | 0.00257856           | 6.30857            | 6.30857                      | T up vs N                              | 12.716  | 31.7759   | 39.9839    | 1         |
| cg11287660                                                       | C15orf48;C15orf48            | 8.33E-05          | 8.33E-05             | 13.415             | 13.415                       | T up vs N                              | 27.304  | 63.1386   | 36.9995    | 1         |
| cg11288686                                                       | TMTC1                        | 0.00101966        | 0.00101966           | 0.265136           | -3.77165                     | T down vs N                            | 16.046  | 16.5059   | 16.4587    | 1         |
| cg11290635                                                       | CDX4                         | 0.00080019        | 0.000800192          | 0.267837           | -3.73361                     | T down vs N                            | 16.984  | 16.2548   | 15.3128    | 1         |
| cg11291305                                                       | ATXN1;ATXN1                  | 0.00341064        | 0.00341064           | 0.267666           | -3.736                       | T down vs N                            | 11.789  | 16.2706   | 22.0831    | 1         |
| cg11293176                                                       | WNT5A                        | 0.0006147         | 0.000614703          | 0.257982           | -3.87623                     | T down vs N                            | 18.039  | 17.1931   | 15.2495    | 1         |
| cg11293699                                                       | FOXL2;C3orf72                | 1.25E-06          | 1.25E-06             | 0.24039            | -4.1599                      | T down vs N                            | 56.397  | 19.0323   | 5.39949    | 1         |
| cg11294364                                                       | NLRP4                        | 0.00447489        | 0.00447489           | 0.202583           | -4.93624                     | T down vs N                            | 10.921  | 23.8757   | 34.9796    | 1         |
| cg11295724                                                       | SIRPD                        | 0.00012587        | 0.000125869          | 0.204641           | -4.88661                     | T down vs N                            | 25.194  | 23.5744   | 14.9717    | 1         |
| cg11295942                                                       | C3                           | 5.74E-05          | 5.74E-05             | 0.260733           | -3.83534                     | T down vs N                            | 29.304  | 16.9249   | 9.24109    | 1         |
| cg11296715                                                       | ARSD;ARSD                    | 0.00482962        | 0.00482962           | 0.300363           | -3.32931                     | T down vs N                            | 10.683  | 13.5495   | 20.2934    | 1         |
| cg11297470                                                       | TCTN1;TCTN1;TCTN1            | 0.00039247        | 0.000392474          | 0.253531           | -3.94429                     | T down vs N                            | 19.918  | 17.6376   | 14.168     | 1         |
| cg11299854                                                       | CCNI2;CCNI2                  | 4.13E-05          | 4.13E-05             | 32.6353            | 32.6353                      | T up vs N                              | 31.162  | 113.78    | 58.4201    | 1         |
| YIF1B;YIF1B;YIF1B;YIF1B;YIF1B;YIF1B;Y                            |                              |                   |                      |                    |                              |                                        |         |           |            |           |
| cg11300098                                                       | IF1B                         | 0.00013261        | 0.000132608          | 0.314501           | -3.17964                     | T down vs N                            | 24.935  | 12.533    | 8.04215    | 1         |
| cg11300147                                                       | CD163L1                      | 1.64E-06          | 1.64E-06             | 0.235306           | -4.24978                     | T down vs N                            | 54.008  | 19.6074   | 5.80871    | 1         |
| cg11300208                                                       | KCNMB2;KCNMB2                | 0.00121908        | 0.00121908           | 0.326754           | -3.06041                     | T down vs N                            | 15.373  | 11.7185   | 12.1964    | 1         |
| cg11302624                                                       | RGS14                        | 1.66E-05          | 1.66E-05             | 0.243579           | -4.10544                     | T down vs N                            | 36.71   | 18.682    | 8.14249    | 1         |
| cg11303605                                                       | CDC20B;CDC20B;CDC20B         | 0.00076383        | 0.000763826          | 0.332749           | -3.00526                     | T down vs N                            | 17.168  | 11.3406   | 10.5692    | 1         |
| CSGALNACT1;CSGALNACT1;CSGALNAC                                   |                              |                   |                      |                    |                              |                                        |         |           |            |           |
| cg11303988                                                       | T1                           | 0.00030138        | 0.000301382          | 0.253092           | -3.95113                     | T down vs N                            | 21.076  | 17.6822   | 13.4236    | 1         |
| cg11304234                                                       | IL18;IL18                    | 0.00288676        | 0.00288676           | 0.263675           | -3.79255                     | T down vs N                            | 12.337  | 16.6436   | 21.585     | 1         |
| cg11304283                                                       | POLS                         | 0.00625766        | 0.00625766           | 0.277117           | -3.60858                     | T down vs N                            | 9.8924  | 15.4251   | 24.9486    | 1         |
| cg11304383                                                       | APOBEC1                      | 7.26E-05          | 7.26E-05             | 0.215638           | -4.63739                     | T down vs N                            | 28.03   | 22.0444   | 12.5834    | 1         |
| cg11306628                                                       | PDGFA;PDGFA                  | 0.00563197        | 0.00563197           | 5.16296            | 5.16296                      | T up vs N                              | 10.211  | 25.2376   | 39.5476    | 1         |
|                                                                  |                              |                   |                      |                    |                              |                                        |         |           |            |           |
| cg11308170                                                       | SNORA1;SNORA8;SNORD5;SNORA18 | 7.36E-05          | 7.36E-05             | 0.288517           | -3.466                       | T down vs N                            | 27.963  | 14.4712   | 8.28034    | 1         |
| cg11314042                                                       | AIG1                         | 0.00049006        | 0.000490059          | 0.306476           | -3.2629                      | T down vs N                            | 18.975  | 13.0993   | 11.0457    | 1         |
| cg11316904                                                       | CREB5                        | 0.00321104        | 0.00321104           | 0.295714           | -3.38165                     | T down vs N                            | 11.986  | 13.9032   | 18.5599    | 1         |
| cg11317199                                                       | TRIM14;TRIM14;TRIM14;TRIM14  | 7.47E-06          | 7.47E-06             | 5.46002            | 5.46002                      | T up vs N                              | 42.107  | 26.9871   | 10.2547    | 1         |
| cg11318133                                                       | OAS2;OAS2;OAS2               | 7.70E-05          | 7.70E-05             | 0.320333           | -3.12175                     | T down vs N                            | 27.721  | 12.138    | 7.00574    | 1         |

| Probeset ID | UCSC_REFGENE_NAME                | p-value<br>(Type) | p-value (T vs.<br>N) | Ratio (T<br>vs. N) | Fold-<br>Change (T<br>vs. N) | Fold-Change (T vs.<br>N) (Description) | F(Type) | SS (Type) | SS (Error) | F (Error) |
|-------------|----------------------------------|-------------------|----------------------|--------------------|------------------------------|----------------------------------------|---------|-----------|------------|-----------|
| cg11320144  | PDYN                             | 4.25E-05          | 4.25E-05             | 0.314259           | -3.18208                     | T down vs N                            | 30.991  | 12.5496   | 6.47906    | 1         |
| cg11320271  | CCDC36;CCDC36                    | 8.85E-06          | 8.85E-06             | 0.186503           | -5.36185                     | T down vs N                            | 40.913  | 26.4133   | 10.3294    | 1         |
| cg11320553  | PSG9                             | 3.09E-05          | 3.09E-05             | 0.171988           | -5.81436                     | T down vs N                            | 32.845  | 29.0235   | 14.1383    | 1         |
| cg11323483  | PIP                              | 1.48E-05          | 1.48E-05             | 0.216305           | -4.6231                      | T down vs N                            | 37.444  | 21.9558   | 9.38175    | 1         |
| cg11323506  | RNU5E;RNU5D;CKMT2;CKMT2;CKMT2    | 3.78E-05          | 3.78E-05             | 4.15411            | 4.15411                      | T up vs N                              | 31.673  | 18.9951   | 9.59575    | 1         |
| cg11323650  | OR8J3                            | 0.00165807        | 0.00165807           | 0.28247            | -3.5402                      | T down vs N                            | 14.25   | 14.9686   | 16.8065    | 1         |
| cg11325997  | AMH                              | 0.00013167        | 0.000131671          | 3.18688            | 3.18688                      | T up vs N                              | 24.97   | 12.5823   | 8.06246    | 1         |
| cg11328898  | NTM                              | 0.0001672         | 0.000167196          | 0.264873           | -3.7754                      | T down vs N                            | 23.804  | 16.5306   | 11.1111    | 1         |
| cg11331191  | ASB12                            | 0.00469612        | 0.00469612           | 0.299097           | -3.3434                      | T down vs N                            | 10.77   | 13.6448   | 20.2707    | 1         |
| cg11332236  | RHCG                             | 6.98E-05          | 6.98E-05             | 7.60054            | 7.60054                      | T up vs N                              | 28.245  | 38.5293   | 21.8256    | 1         |
| cg11332928  | BTBD19;TCTEX1D4                  | 4.61E-05          | 4.61E-05             | 0.324269           | -3.08386                     | T down vs N                            | 30.53   | 11.879    | 6.22551    | 1         |
| cg11333375  | MORN1                            | 0.00535798        | 0.00535798           | 0.230034           | -4.34719                     | T down vs N                            | 10.363  | 20.2264   | 31.2294    | 1         |
| cg11333459  | PAX6                             | 0.00016011        | 0.00016011           | 6.03528            | 6.03528                      | T up vs N                              | 24.013  | 30.2662   | 20.1667    | 1         |
| cg11335133  | LRRC8D;LRRC8D                    | 0.00043848        | 0.000438482          | 0.238877           | -4.18626                     | T down vs N                            | 19.444  | 19.2013   | 15.8003    | 1         |
| cg11336311  | ID3                              | 0.00408592        | 0.00408592           | 0.045471           | -4.07379                     | T down vs N                            | 11.208  | 18.4778   | 26.3781    | 1         |
| cg11336696  | TMEM27                           | 2.59E-05          | 2.59E-05             | 0.182418           | -5.48192                     | T down vs N                            | 33.922  | 27.1146   | 12.7892    | 1         |
| cg11337945  | C5orf38                          | 0.00466613        | 0.00466613           | 10.4222            | 10.4222                      | T up vs N                              | 10.79   | 51.4581   | 76.3045    | 1         |
| cg11340834  | ARSH                             | 0.0015437         | 0.0015437            | 0.213664           | -4.68024                     | T down vs N                            | 14.507  | 22.3095   | 24.6052    | 1         |
| cg11341142  | RAB21                            | 0.00014872        | 0.000148715          | 0.235086           | -4.25377                     | T down vs N                            | 24.371  | 19.6328   | 12.8892    | 1         |
| cg11342645  | RBM28;RBM28                      | 0.00226974        | 0.00226974           | 0.331886           | -3.01308                     | T down vs N                            | 13.15   | 11.3942   | 13.8639    | 1         |
| cg11343894  | S100A13;S100A13;S100A13;S100A13; | 0.00027405        | 0.00027405           | 7.71334            | 7.71334                      | T up vs N                              | 21.502  | 39.0911   | 29.0878    | 1         |
| cg11344574  | HRNR                             | 0.00025476        | 0.000254761          | 0.292162           | -3.42276                     | T down vs N                            | 21.833  | 14.1804   | 10.3917    | 1         |
| cg11346522  | KCNK2                            | 6.60E-07          | 6.60E-07             | 0.158687           | -6.30173                     | T down vs N                            | 62.298  | 31.7385   | 8.15145    | 1         |
| cg11348442  | TUBA4B;TUBA4A                    | 2.12E-05          | 2.12E-05             | 5.35267            | 5.35267                      | T up vs N                              | 35.145  | 26.3594   | 12.0005    | 1         |
| cg11353035  | BCL6B;BCL6B                      | 0.00025769        | 0.000257688          | 5.49496            | 5.49496                      | T up vs N                              | 21.781  | 27.1904   | 19.9734    | 1         |
| cg11353706  | SERPINE1;SERPINE1                | 5.11E-05          | 5.11E-05             | 0.222494           | -4.4945                      | T down vs N                            | 29.951  | 21.1541   | 11.3009    | 1         |
| cg11353792  | LOC284379                        | 0.00017193        | 0.000171931          | 0.248852           | -4.01845                     | T down vs N                            | 23.67   | 18.1197   | 12.2482    | 1         |
| cg11362449  | ERO1LB                           | 5.90E-07          | 5.90E-07             | 0.145492           | -6.87321                     | T down vs N                            | 63.392  | 34.8024   | 8.78409    | 1         |
| cg11364273  | MACROD1                          | 0.00108187        | 0.00108187           | 10.6998            | 10.6998                      | T up vs N                              | 15.821  | 52.6187   | 53.2138    | 1         |
| cg11365072  | KIF4B                            | 8.86E-05          | 8.86E-05             | 0.234169           | -4.27041                     | T down vs N                            | 26.983  | 19.7388   | 11.7046    | 1         |
| cg11374355  | RPS16                            | 8.04E-05          | 8.04E-05             | 0.251267           | -3.97983                     | T down vs N                            | 27.495  | 17.869    | 10.3985    | 1         |
| cg11377136  | PKDREJ                           | 0.00112357        | 0.00112357           | 19.3795            | 19.3795                      | T up vs N                              | 15.678  | 82.2965   | 83.9847    | 1         |
| cg11378502  | ZNF793                           | 0.00604887        | 0.00604887           | 0.311836           | -3.20682                     | T down vs N                            | 9.9944  | 12.7181   | 20.3603    | 1         |
| cg11378979  | SLC11A1                          | 1.37E-05          | 1.37E-05             | 0.320688           | -3.1183                      | T down vs N                            | 37.957  | 12.1144   | 5.10661    | 1         |
| cg11382529  | LOC401463                        | 0.00567643        | 0.00567643           | 0.209783           | -4.76684                     | T down vs N                            | 10.187  | 22.8427   | 35.8787    | 1         |
| cg11383291  | ITGB5                            | 0.00011761        | 0.000117613          | 0.282862           | -3.5353                      | T down vs N                            | 25.533  | 14.9358   | 9.35936    | 1         |
| cg11383981  | LRTM1;CACNA2D3                   | 3.51E-07          | 3.51E-07             | 0.297682           | -3.35929                     | T down vs N                            | 68.642  | 13.7523   | 3.20557    | 1         |
| cg11386025  | KCNQ4;KCNQ4                      | 2.41E-05          | 2.41E-05             | 5.50982            | 5.50982                      | T up vs N                              | 34.352  | 27.2766   | 12.7047    | 1         |
| cg11386080  | COL21A1                          | 7.45E-05          | 7.45E-05             | 8.13619            | 8.13619                      | T up vs N                              | 27.895  | 41.1602   | 23.6087    | 1         |
| cg11386098  | SYT7                             | 0.00159004        | 0.00159004           | 0.324637           | -3.08036                     | T down vs N                            | 14.401  | 11.855    | 13.1717    | 1         |
| cg11387073  | DLG1;DLG1                        | 0.00017538        | 0.000175381          | 3.63409            | 3.63409                      | T up vs N                              | 24.477  | 14.6776   | 8.99469    | 1         |
| cg11387248  | PSG8;PSG8;PSG8                   | 2.08E-05          | 2.08E-05             | 0.137445           | -7.27563                     | T down vs N                            | 35.277  | 36.8873   | 16.7304    | 1         |
| cg11389889  | NOP56;NOP56;SNORD110;SNORA51     | 3.61E-06          | 3.61E-06             | 0.140008           | -7.14245                     | T down vs N                            | 47.519  | 36.2037   | 12.19      | 1         |
| cg11391428  | 4-Mar                            | 4.31E-06          | 4.31E-06             | 0.331192           | -3.0194                      | T down vs N                            | 46.155  | 11.4375   | 3.96487    | 1         |
| cg11397369  | PSMD1                            | 3.34E-06          | 3.34E-06             | 0.177546           | -5.63234                     | T down vs N                            | 48.143  | 27.9842   | 9.30032    | 1         |
| cg11397370  | GRHL2                            | 0.00021013        | 0.000210129          | 3.34162            | 3.34162                      | T up vs N                              | 22.722  | 13.6328   | 9.59991    | 1         |
| cg11397957  | LEAP2                            | 5.69E-05          | 5.69E-05             | 0.186645           | -5.35775                     | T down vs N                            | 29.357  | 26.3893   | 14.3825    | 1         |
| cg11399409  | GBA;GBA;GBA;GBA                  | 0.00089851        | 0.00089851           | 0.304743           | -3.28146                     | T down vs N                            | 16.532  | 13.2253   | 12.7997    | 1         |
| cg11400774  | MEX3A                            | 0.00450401        | 0.00450401           | 0.215953           | -4.63064                     | T down vs N                            | 10.901  | 22.0025   | 32.2955    | 1         |
| cg11401257  | ITPKB                            | 2.40E-05          | 2.40E-05             | 0.287086           | -3.48327                     | T down vs N                            | 36.09   | 13.7291   | 5.7062     | 1         |
| cg11402847  | MICB                             | 4.37E-05          | 4.37E-05             | 0.308234           | -3.24429                     | T down vs N                            | 30.83   | 12.9729   | 6.73262    | 1         |
| cg11403598  | NIP7;COG8                        | 7.34E-05          | 7.34E-05             | 0.305177           | -3.27679                     | T down vs N                            | 27.974  | 13.1936   | 7.54616    | 1         |
| cg11403831  | FER                              | 0.00041989        | 0.000419885          | 0.306264           | -3.26516                     | T down vs N                            | 19.629  | 13.1147   | 10.6902    | 1         |
| cg11404751  | TACC2;TACC2                      | 0.00021913        | 0.000219125          | 0.291242           | -3.43358                     | T down vs N                            | 22.526  | 14.2532   | 10.1238    | 1         |
| cg11404992  | SGCD;SGCD;SGCD                   | 1.56E-06          | 1.56E-06             | 0.194115           | -5.15158                     | T down vs N                            | 54.42   | 25.1698   | 7.4002     | 1         |
| cg11405475  | SNRPE                            | 0.00038201        | 0.000382014          | 0.251481           | -3.97644                     | T down vs N                            | 20.035  | 17.8469   | 14.2527    | 1         |
| cg11412288  | DCBLD1                           | 1.84E-05          | 1.84E-05             | 3.68978            | 3.68978                      | T up vs N                              | 36.047  | 15.9647   | 7.08608    | 1         |
| cg11413133  | KCNJ12                           | 3.67E-05          | 3.67E-05             | 19.6206            | 19.6206                      | T up vs N                              | 31.834  | 82.9845   | 41.709     | 1         |
| cg11414044  | AATF                             | 0.00024263        | 0.000242631          | 0.126104           | -7.92996                     | T down vs N                            | 22.056  | 40.1582   | 29.1315    | 1         |
| cg11415512  | MUC2                             | 0.00344926        | 0.00344926           | 0.286265           | -3.49326                     | T down vs N                            | 11.752  | 14.6542   | 19.9512    | 1         |
| cg11416552  | CD163L1                          | 5.27E-08          | 5.27E-08             | 0.171305           | -5.83755                     | T down vs N                            | 90.999  | 29.1549   | 5.12619    | 1         |
| cg11419111  | IL1F8;IL1F8                      | 0.00015329        | 0.000153292          | 0.194941           | -5.12977                     | T down vs N                            | 24.224  | 25.0397   | 16.539     | 1         |
| cg11420883  | PAPOLB;RADIL;PAPOLB              | 0.00022426        | 0.000224264          | 4.15239            | 4.15239                      | T up vs N                              | 22.419  | 18.984    | 13.5486    | 1         |
| cg11423096  | UIMC1                            | 0.00016406        | 0.000164058          | 0.207922           | -4.8095                      | T down vs N                            | 23.895  | 23.1041   | 15.4702    | 1         |
| cg11424312  | KIF26B                           | 0.00014091        | 0.000140913          | 0.201298           | -4.96775                     | T down vs N                            | 24.635  | 24.0664   | 15.6307    | 1         |
| cg11425517  | HAS1                             | 0.00087225        | 0.000872254          | 0.291722           | -3.42792                     | T down vs N                            | 16.647  | 14.2151   | 13.6626    | 1         |
| cg11429969  | PCDHA2;PCDHA1;PCDHA3;PCDHA3;PC   | 0.00018826        | 0.000188256          | 3.48949            | 3.48949                      | T up vs N                              | 23.238  | 14.6289   | 10.0723    | 1         |
| cg11431101  | C6orf26                          | 1.28E-05          | 1.28E-05             | 0.261284           | -3.82725                     | T down vs N                            | 38.385  | 16.8718   | 7.03269    | 1         |

| Probeset ID                         | UCSC_REFGENE_NAME           | p-value<br>(Type) | p-value (T vs.<br>N) | Ratio (T<br>vs. N) | Fold-<br>Change (T<br>vs. N) | Fold-Change (T vs.<br>N) (Description) | F(Type) | SS (Type) | SS (Error) | F (Error) |
|-------------------------------------|-----------------------------|-------------------|----------------------|--------------------|------------------------------|----------------------------------------|---------|-----------|------------|-----------|
| cg11433622                          | MEIS1                       | 0.00311998        | 0.00311998           | 0.154291           | -6.48126                     | T down vs N                            | 12.08   | 32.7145   | 43.3301    | 1         |
| cg11435506                          | PON3                        | 2.75E-05          | 2.75E-05             | 4.88463            | 4.88463                      | T up vs N                              | 33.56   | 23.5624   | 11.2335    | 1         |
| cg11436222                          | HIST1H3E                    | 1.09E-05          | 1.09E-05             | 7.5099             | 7.5099                       | T up vs N                              | 39.509  | 38.0749   | 15.4191    | 1         |
| cg11437063                          | ADARB2                      | 0.00086002        | 0.000860023          | 0.094058           | -10.6318                     | T down vs N                            | 16.702  | 52.3359   | 50.1361    | 1         |
| cg11438039                          | PTPRG                       | 0.00033224        | 0.000332241          | 0.262533           | -3.80904                     | T down vs N                            | 20.644  | 16.7521   | 12.9836    | 1         |
| cg11441693                          | SAMD14                      | 0.00010857        | 0.000108574          | 3.28104            | 3.28104                      | T up vs N                              | 25.937  | 13.2225   | 8.15666    | 1         |
| FLJ35220;FLJ35220;FLJ35220;LOC100   |                             |                   |                      |                    |                              |                                        |         |           |            |           |
| cg11442110                          | 294362                      | 3.09E-05          | 3.09E-05             | 0.134163           | -7.45361                     | T down vs N                            | 32.852  | 37.7912   | 18.4055    | 1         |
| cg11444048                          | HRNBP3                      | 0.0014721         | 0.0014721            | 0.200492           | -4.98774                     | T down vs N                            | 14.679  | 24.1871   | 26.3633    | 1         |
| cg11445226                          | TRIM41;TRIM41               | 3.58E-05          | 3.58E-05             | 0.251465           | -3.9767                      | T down vs N                            | 31.978  | 17.8486   | 8.93059    | 1         |
| cg11448807                          | ZAR1L                       | 0.0002093         | 0.000209303          | 0.259815           | -3.8489                      | T down vs N                            | 22.74   | 17.0139   | 11.9711    | 1         |
| cg11449372                          | JSRP1                       | 3.14E-05          | 3.14E-05             | 0.223286           | -4.47856                     | T down vs N                            | 32.762  | 21.0542   | 10.2822    | 1         |
| cg11451043                          | HLA-DPA1                    | 1.72E-05          | 1.72E-05             | 0.206594           | -4.84041                     | T down vs N                            | 36.488  | 23.2929   | 10.2141    | 1         |
| cg11452501                          | LY6G5C                      | 7.86E-06          | 7.86E-06             | 0.216439           | -4.62024                     | T down vs N                            | 41.751  | 21.9381   | 8.40731    | 1         |
| cg11461670                          | PDLIM2                      | 0.00016139        | 0.000161394          | 0.259024           | -3.86065                     | T down vs N                            | 23.974  | 17.091    | 11.4063    | 1         |
| cg11462865                          | KRT19                       | 0.00110231        | 0.00110231           | 6.92227            | 6.92227                      | T up vs N                              | 15.75   | 35.0597   | 35.6154    | 1         |
| cg11463113                          | CRYGD                       | 3.66E-06          | 3.66E-06             | 0.178576           | -5.59985                     | T down vs N                            | 47.424  | 27.7972   | 9.37835    | 1         |
| cg11469061                          | PAX6;PAX6;PAX6              | 4.04E-05          | 4.04E-05             | 5.89845            | 5.89845                      | T up vs N                              | 31.287  | 29.499    | 15.0856    | 1         |
| cg11469594                          | HLA-DOB                     | 3.48E-06          | 3.48E-06             | 0.328699           | -3.04229                     | T down vs N                            | 47.813  | 11.5944   | 3.87991    | 1         |
| cg11470337                          | NPC1L1;NPC1L1               | 0.00163756        | 0.00163756           | 0.241671           | -4.13786                     | T down vs N                            | 14.674  | 17.7795   | 18.1752    | 1         |
| cg11479380                          | TFEC;TFEC                   | 9.67E-05          | 9.67E-05             | 0.132519           | -7.54611                     | T down vs N                            | 26.528  | 38.2568   | 23.074     | 1         |
| cg11482794                          | TGFB1                       | 0.00016721        | 0.000167206          | 13.3252            | 13.3252                      | T up vs N                              | 23.804  | 62.8125   | 42.2202    | 1         |
| BTNL8;BTNL8;BTNL8;BTNL8;BTNL8;BTNL8 |                             |                   |                      |                    |                              |                                        |         |           |            |           |
| cg11490076                          | NL8                         | 0.00140567        | 0.00140567           | 0.330841           | -3.0226                      | T down vs N                            | 14.848  | 11.4595   | 12.349     | 1         |
| cg11490276                          | ALDH3B2;ALDH3B2             | 0.00088814        | 0.000888144          | 0.297074           | -3.36617                     | T down vs N                            | 16.577  | 13.7987   | 13.3185    | 1         |
| cg11498156                          | TLX1;TLX1NB                 | 4.03E-05          | 4.03E-05             | 0.213412           | -4.68576                     | T down vs N                            | 31.294  | 22.3436   | 11.4238    | 1         |
| cg11498607                          | RUNX1                       | 0.0014295         | 0.0014295            | 7.95294            | 7.95294                      | T up vs N                              | 14.786  | 40.2705   | 43.5765    | 1         |
| cg11502844                          | DDX1                        | 0.00046402        | 0.000464021          | 0.296445           | -3.3733                      | T down vs N                            | 19.838  | 13.0323   | 9.85418    | 1         |
| cg11503274                          | CDX1                        | 0.00667371        | 0.00667371           | 3.05992            | 3.05992                      | T up vs N                              | 9.7002  | 11.7151   | 19.3234    | 1         |
| cg11503711                          | PRB4                        | 3.19E-07          | 3.19E-07             | 0.151617           | -6.59555                     | T down vs N                            | 75.039  | 31.3688   | 6.2705     | 1         |
| cg11504078                          | GREM2                       | 0.00051852        | 0.000518521          | 0.328919           | -3.04026                     | T down vs N                            | 18.739  | 11.5805   | 9.88773    | 1         |
| cg11505417                          | C1QA                        | 0.00037599        | 0.000375993          | 0.317996           | -3.1447                      | T down vs N                            | 20.104  | 12.2947   | 9.78499    | 1         |
| cg11505661                          | NXPH4                       | 0.00013345        | 0.000133452          | 5.41036            | 5.41036                      | T up vs N                              | 24.903  | 26.6974   | 17.1528    | 1         |
| cg11507532                          | COL23A1                     | 0.00072725        | 0.000727246          | 0.257961           | -3.87656                     | T down vs N                            | 17.363  | 17.1952   | 15.8458    | 1         |
| cg11510999                          | ITGB7                       | 1.96E-05          | 1.96E-05             | 7.93266            | 7.93266                      | T up vs N                              | 35.655  | 40.1714   | 18.0267    | 1         |
| cg11515215                          | LOC387647                   | 7.72E-05          | 7.72E-05             | 0.218283           | -4.58121                     | T down vs N                            | 27.704  | 21.6955   | 12.5297    | 1         |
| cg11515702                          | ALDH3B1;ALDH3B1;ALDH3B1     | 3.05E-07          | 3.05E-07             | 0.259792           | -3.84923                     | T down vs N                            | 70.115  | 17.0161   | 3.883      | 1         |
| cg11517468                          | CAMTA1                      | 7.92E-05          | 7.92E-05             | 6.36053            | 6.36053                      | T up vs N                              | 27.57   | 32.0595   | 18.6053    | 1         |
| cg11519760                          | DLL1                        | 0.00179159        | 0.00179159           | 0.215428           | -4.64192                     | T down vs N                            | 13.975  | 22.0725   | 25.2714    | 1         |
| cg11520395                          | JMJD4;SNAP47;JMJD4          | 0.00014331        | 0.000143307          | 0.3121             | -3.2041                      | T down vs N                            | 24.552  | 12.6996   | 8.27592    | 1         |
| cg11521325                          | CCDC114                     | 0.00044943        | 0.000449427          | 0.322347           | -3.10225                     | T down vs N                            | 19.339  | 12.0047   | 9.93187    | 1         |
| cg11521434                          | EPHA10;EPHA10               | 0.00621063        | 0.00621063           | 3.40413            | 3.40413                      | T up vs N                              | 9.915   | 14.0548   | 22.6804    | 1         |
| cg11522612                          | LY6G6C                      | 1.47E-05          | 1.47E-05             | 0.25617            | -3.90366                     | T down vs N                            | 37.473  | 17.3725   | 7.41767    | 1         |
| cg11526198                          | E2F2                        | 0.00026588        | 0.000265877          | 0.239816           | -4.16986                     | T down vs N                            | 21.639  | 19.0962   | 14.1196    | 1         |
| cg11527730                          | XIRP2;XIRP2                 | 0.00093594        | 0.000935938          | 0.308186           | -3.24479                     | T down vs N                            | 16.374  | 12.9763   | 12.6798    | 1         |
| cg11527772                          | HLA-DOA                     | 0.00023794        | 0.000237939          | 0.309794           | -3.22795                     | T down vs N                            | 22.146  | 12.8618   | 9.29247    | 1         |
| cg11531232                          | LOC442293                   | 1.60E-06          | 1.60E-06             | 3.86325            | 3.86325                      | T up vs N                              | 54.191  | 17.108    | 5.05122    | 1         |
| cg11531272                          | RAP1GAP;RAP1GAP;RAP1GAP     | 0.0001547         | 0.000154704          | 3.50122            | 3.50122                      | T up vs N                              | 24.179  | 14.7076   | 9.73241    | 1         |
| cg11532513                          | LRTM1;CACNA2D3              | 1.50E-05          | 1.50E-05             | 0.311146           | -3.21393                     | T down vs N                            | 37.378  | 12.7665   | 5.46486    | 1         |
| cg11533881                          | HCG4P6                      | 5.18E-05          | 5.18E-05             | 8.61267            | 8.61267                      | T up vs N                              | 29.876  | 43.4254   | 23.2563    | 1         |
| cg11534680                          | GREB1;GREB1                 | 1.16E-07          | 1.16E-07             | 0.178225           | -5.61089                     | T down vs N                            | 81.08   | 27.8608   | 5.49791    | 1         |
| cg11535506                          | RPTN                        | 6.40E-05          | 6.40E-05             | 0.161526           | -6.19094                     | T down vs N                            | 28.71   | 31.1298   | 17.3485    | 1         |
| cg11537828                          | CNPY1                       | 1.94E-05          | 1.94E-05             | 0.248759           | -4.01996                     | T down vs N                            | 35.719  | 18.1295   | 8.12084    | 1         |
| cg11539664                          | ITPR3                       | 1.46E-05          | 1.46E-05             | 0.285434           | -3.50344                     | T down vs N                            | 37.531  | 14.7224   | 6.27638    | 1         |
| cg11539992                          | RHBDF2;RHBDF2               | 0.00140698        | 0.00140698           | 6.94944            | 6.94944                      | T up vs N                              | 14.844  | 35.2018   | 37.9429    | 1         |
| cg11540553                          | LOC390595                   | 4.10E-05          | 4.10E-05             | 3.50251            | 3.50251                      | T up vs N                              | 31.205  | 14.7162   | 7.5455     | 1         |
| cg11541486                          | BTBD17                      | 0.00427073        | 0.00427073           | 0.325847           | -3.06893                     | T down vs N                            | 11.068  | 11.7768   | 17.0248    | 1         |
| cg11545720                          | SEMA6B                      | 3.13E-05          | 3.13E-05             | 4.74192            | 4.74192                      | T up vs N                              | 32.779  | 22.6897   | 11.0752    | 1         |
| cg11547764                          | OR2Z1                       | 0.00062155        | 0.000621546          | 0.294933           | -3.3906                      | T down vs N                            | 17.994  | 13.9636   | 12.4161    | 1         |
| cg11548914                          | FKBP7;FKBP7;PLEKHA3;MIR548N | 0.00239847        | 0.00239847           | 7.58415            | 7.58415                      | T up vs N                              | 12.961  | 38.4473   | 47.462     | 1         |
| cg11552868                          | ETS1                        | 0.00027397        | 0.000273968          | 0.234103           | -4.27163                     | T down vs N                            | 21.504  | 19.7466   | 14.6926    | 1         |
| cg11553153                          | CHRM5                       | 1.27E-05          | 1.27E-05             | 0.325027           | -3.07666                     | T down vs N                            | 38.478  | 11.8297   | 4.91905    | 1         |
| cg11554507                          | NEUROD6                     | 0.00141959        | 0.00141959           | 0.29664            | -3.37109                     | T down vs N                            | 14.812  | 13.8319   | 14.9418    | 1         |
| cg11554605                          | ASB4;ASB4                   | 0.00041002        | 0.000410018          | 0.15107            | -6.61944                     | T down vs N                            | 19.73   | 33.4572   | 27.1316    | 1         |
| cg11555666                          | CARD14;CARD14               | 3.61E-05          | 3.61E-05             | 0.111147           | -8.99707                     | T down vs N                            | 31.938  | 45.2045   | 22.6464    | 1         |
| cg11557929                          | ATRIIP;ATRIIP               | 2.91E-05          | 2.91E-05             | 0.313991           | -3.1848                      | T down vs N                            | 33.222  | 12.5682   | 6.05303    | 1         |
| cg11558551                          | BST2                        | 0.00186366        | 0.00186366           | 0.302096           | -3.31021                     | T down vs N                            | 13.835  | 13.4202   | 15.5199    | 1         |
| cg11558654                          | PCDH811                     | 8.67E-05          | 8.67E-05             | 3.29974            | 3.29974                      | T up vs N                              | 27.093  | 13.3493   | 7.88345    | 1         |
| PCDHA2;PCDHA1;PCDHA3;PCDHA3;PC      |                             |                   |                      |                    |                              |                                        |         |           |            |           |
| cg11560197                          | DHA1                        | 0.00058306        | 0.000583059          | 3.37768            | 3.37768                      | T up vs N                              | 18.255  | 13.8764   | 12.1624    | 1         |
| cg11562153                          | GPX5;GPX5                   | 1.79E-05          | 1.79E-05             | 0.20937            | -4.77624                     | T down vs N                            | 36.23   | 22.9004   | 10.1132    | 1         |
| cg11562901                          | WIBG;WIBG                   | 0.00043839        | 0.000438385          | 0.20064            | -4.98406                     | T down vs N                            | 19.445  | 24.1649   | 19.8838    | 1         |

| Probeset ID                                                                             | UCSC_REFGENE_NAME            | p-value<br>(Type) | p-value (T vs.<br>N) | Ratio (T<br>vs. N) | Fold-<br>Change (T<br>vs. N) | Fold-Change (T vs.<br>N) (Description) | F(Type) | SS (Type) | SS (Error) | F (Error) |
|-----------------------------------------------------------------------------------------|------------------------------|-------------------|----------------------|--------------------|------------------------------|----------------------------------------|---------|-----------|------------|-----------|
| cg11568791                                                                              | ZDHHC11                      | 0.00037307        | 0.00037307           | 0.300063           | -3.33264                     | T down vs N                            | 20.138  | 13.572    | 10.7834    | 1         |
| cg11569329                                                                              | RPS9                         | 1.07E-06          | 1.07E-06             | 0.311084           | -3.21456                     | T down vs N                            | 57.815  | 12.7708   | 3.53427    | 1         |
| cg11569718                                                                              | RPS5                         | 0.00027459        | 0.000274592          | 0.28531            | -3.50496                     | T down vs N                            | 21.494  | 14.7327   | 10.9672    | 1         |
| cg11574001                                                                              | EPS8L2                       | 6.67E-05          | 6.67E-05             | 4.92765            | 4.92765                      | T up vs N                              | 28.485  | 23.8236   | 13.3816    | 1         |
| cg11574055                                                                              | CD58;CD58;CD58               | 1.73E-06          | 1.73E-06             | 3.37542            | 3.37542                      | T up vs N                              | 53.544  | 13.8611   | 4.142      | 1         |
| cg11575295                                                                              | PTPRN2;PTPRN2;PTPRN2         | 3.04E-06          | 3.04E-06             | 0.323978           | -3.08663                     | T down vs N                            | 48.892  | 11.8979   | 3.8936     | 1         |
| cg11576988                                                                              | HMGNA4                       | 6.64E-05          | 6.64E-05             | 0.255139           | -3.91943                     | T down vs N                            | 28.511  | 17.4755   | 9.80699    | 1         |
| cg11577898                                                                              | ARSB                         | 7.90E-07          | 7.90E-07             | 0.177531           | -5.63282                     | T down vs N                            | 60.587  | 27.9869   | 7.39086    | 1         |
| cg11579116                                                                              | EMR4P                        | 7.90E-06          | 7.90E-06             | 0.292164           | -3.42274                     | T down vs N                            | 41.715  | 14.1802   | 5.43889    | 1         |
| ITGB1;ITGB1;ITGB1;ITGB1;ITGB1;ITGB1                                                     |                              |                   |                      |                    |                              |                                        |         |           |            |           |
| cg11582476                                                                              | 1                            | 0.00224201        | 0.00224201           | 0.28657            | -3.48955                     | T down vs N                            | 13.192  | 14.6293   | 17.7433    | 1         |
| cg11582484                                                                              | SNORD115-10;SNORD115-42      | 0.00102155        | 0.00102155           | 0.276766           | -3.61315                     | T down vs N                            | 16.039  | 15.4556   | 15.4181    | 1         |
| cg11583211                                                                              | LCE1D;LCE1D                  | 0.00173497        | 0.00173497           | 0.307996           | -3.2468                      | T down vs N                            | 14.089  | 12.99     | 14.7523    | 1         |
| SLC26A5;SLC26A5;SLC26A5;SLC26A5;S                                                       |                              |                   |                      |                    |                              |                                        |         |           |            |           |
| cg11583392                                                                              | LC26A5                       | 3.07E-05          | 3.07E-05             | 0.291207           | -3.43398                     | T down vs N                            | 32.884  | 14.2559   | 6.93626    | 1         |
| cg11584277                                                                              | CCL23;CCL23;CCL23;CCL23      | 0.00038664        | 0.000386644          | 0.266232           | -3.75612                     | T down vs N                            | 19.983  | 16.4035   | 13.134     | 1         |
| cg11584519                                                                              | 11-Mar                       | 3.96E-05          | 3.96E-05             | 0.152964           | -6.53749                     | T down vs N                            | 31.401  | 33.0176   | 16.8236    | 1         |
| cg11585605                                                                              | RAB3B                        | 0.00054484        | 0.000544839          | 0.312696           | -3.19799                     | T down vs N                            | 18.534  | 12.658    | 10.9274    | 1         |
| cg11586330                                                                              | LHX5                         | 0.00314983        | 0.00314983           | 0.182031           | -5.49357                     | T down vs N                            | 12.049  | 27.1823   | 36.0963    | 1         |
| cg11588197                                                                              | ETS1;ETS1;ETS1               | 2.64E-06          | 2.64E-06             | 0.151529           | -6.59938                     | T down vs N                            | 50.011  | 33.3499   | 10.6696    | 1         |
| cg11588787                                                                              | LNK2                         | 9.79E-05          | 9.79E-05             | 0.216254           | -4.62418                     | T down vs N                            | 26.464  | 21.9625   | 13.2786    | 1         |
| SNAR-A14;SNAR-A3;SNAR-A6;SNAR-A4;SNAR-A9;SNAR-A10;SNAR-A7;SNAR-A11;SNAR-A5;SNAR-A8      |                              |                   |                      |                    |                              |                                        |         |           |            |           |
| cg11589664                                                                              | A7;SNAR-A11;SNAR-A5;SNAR-A8  | 9.36E-06          | 9.36E-06             | 0.294942           | -3.39049                     | T down vs N                            | 40.524  | 13.9629   | 5.51299    | 1         |
| cg11589932                                                                              | BHLHA9                       | 0.00064938        | 0.000649376          | 3.25817            | 3.25817                      | T up vs N                              | 17.817  | 13.0672   | 11.7348    | 1         |
| cg11590974                                                                              | C6;C6                        | 6.46E-06          | 6.46E-06             | 0.154091           | -6.48969                     | T down vs N                            | 43.154  | 32.7601   | 12.1464    | 1         |
| cg11591520                                                                              | IL21                         | 5.83E-06          | 5.83E-06             | 0.310587           | -3.21971                     | T down vs N                            | 43.898  | 12.8058   | 4.66744    | 1         |
| cg11591636                                                                              | ZIC5                         | 0.00158013        | 0.00158013           | 0.124562           | -8.02811                     | T down vs N                            | 14.423  | 40.6367   | 45.0796    | 1         |
| cg11592548                                                                              | MAP3K10                      | 0.00234129        | 0.00234129           | 0.223086           | -4.48257                     | T down vs N                            | 13.043  | 21.0794   | 25.8574    | 1         |
| cg11592640                                                                              | CRABP1                       | 5.44E-06          | 5.44E-06             | 0.248593           | -4.02264                     | T down vs N                            | 44.415  | 18.1469   | 6.53721    | 1         |
| cg11593729                                                                              | CLRN1;CLRN1OS                | 0.00030313        | 0.000303134          | 0.329853           | -3.03165                     | T down vs N                            | 21.05   | 11.5215   | 8.75737    | 1         |
| cg11594420                                                                              | TEX101;TEX101                | 0.0003048         | 0.000304798          | 0.18182            | -5.49994                     | T down vs N                            | 21.026  | 27.2193   | 20.713     | 1         |
| PCDHA6;PCDHA2;PCDHA1;PCDHA9;PCDHA7;PCDHA1;PCDHA6;PCDHA10;PCDHA5;PCDHA3;PCDHA4;PCDHA10;P |                              |                   |                      |                    |                              |                                        |         |           |            |           |
| cg11595575                                                                              | HA5;PCDHA3;PCDHA4;PCDHA10;P  | 4.22E-05          | 4.22E-05             | 7.63806            | 7.63806                      | T up vs N                              | 31.04   | 38.7166   | 19.9568    | 1         |
| cg11597157                                                                              | KIF7                         | 0.00116692        | 0.00116692           | 0.315009           | -3.17451                     | T down vs N                            | 15.536  | 12.498    | 12.8711    | 1         |
| cg11601252                                                                              | LBXCOR1                      | 0.00023303        | 0.000233032          | 24.5309            | 24.5309                      | T up vs N                              | 22.242  | 95.9054   | 68.9914    | 1         |
| cg11601254                                                                              | MPP7                         | 3.16E-05          | 3.16E-05             | 0.168301           | -5.94175                     | T down vs N                            | 32.72   | 29.7426   | 14.544     | 1         |
| cg11601336                                                                              | HOMER3                       | 4.04E-07          | 4.04E-07             | 0.266748           | -3.74886                     | T down vs N                            | 67.184  | 16.3555   | 3.89508    | 1         |
| cg11606195                                                                              | GTF2H3                       | 7.33E-05          | 7.33E-05             | 0.304534           | -3.28371                     | T down vs N                            | 27.982  | 13.2405   | 7.57102    | 1         |
| cg11606215                                                                              | PLAC8;PLAC8                  | 0.00019701        | 0.000197013          | 0.273652           | -3.65428                     | T down vs N                            | 23.024  | 15.7291   | 10.9308    | 1         |
| cg11609472                                                                              | DDX42;DDX42                  | 0.00062397        | 0.000623973          | 0.267058           | -3.7445                      | T down vs N                            | 17.978  | 16.3267   | 14.5301    | 1         |
| LOC388796;LOC388796;SNORA71C                                                            |                              |                   |                      |                    |                              |                                        |         |           |            |           |
| cg11609780                                                                              | LOC388796;LOC388796;SNORA71C | 7.88E-06          | 7.88E-06             | 0.177843           | -5.62295                     | T down vs N                            | 41.73   | 27.9302   | 10.7089    | 1         |
| cg11609940                                                                              | ALOX15                       | 0.00014999        | 0.000149991          | 0.275613           | -3.62827                     | T down vs N                            | 24.33   | 15.5562   | 10.2303    | 1         |
| cg11610460                                                                              | RNF43                        | 0.00104863        | 0.00104863           | 0.32648            | -3.06297                     | T down vs N                            | 15.939  | 11.736    | 11.7807    | 1         |
| cg11610925                                                                              | KNDC1                        | 5.94E-05          | 5.94E-05             | 3.76163            | 3.76163                      | T up vs N                              | 29.12   | 16.4398   | 9.03279    | 1         |
| cg11611856                                                                              | UAP1L1                       | 2.14E-05          | 2.14E-05             | 4.88446            | 4.88446                      | T up vs N                              | 35.088  | 23.5613   | 10.7439    | 1         |
| cg11613450                                                                              | PTPRH;PTPRH                  | 7.77E-05          | 7.77E-05             | 0.22864            | -4.37369                     | T down vs N                            | 27.67   | 20.3941   | 11.793     | 1         |
| cg11613559                                                                              | INPP5F;INPP5F                | 4.16E-05          | 4.16E-05             | 4.539              | 4.539                        | T up vs N                              | 31.118  | 21.4324   | 11.0201    | 1         |
| cg11614451                                                                              | TRIM59                       | 0.00297092        | 0.00297092           | 5.4729             | 5.4729                       | T up vs N                              | 12.242  | 27.0621   | 35.3702    | 1         |
| cg11615268                                                                              | C6orf127                     | 0.00010779        | 0.000107792          | 0.242208           | -4.12868                     | T down vs N                            | 25.974  | 18.8316   | 11.6004    | 1         |
| cg11615509                                                                              | SHROOM3                      | 2.51E-05          | 2.51E-05             | 0.255134           | -3.91951                     | T down vs N                            | 34.115  | 17.476    | 8.19624    | 1         |
| CLEC4M;CLEC4M;CLEC4M;CLEC4M;CLEC4M;CLEC4M;CLEC4M;CLEC4M;CLEC4M;CLEC4M                   |                              |                   |                      |                    |                              |                                        |         |           |            |           |
| cg11615959                                                                              | 4M;CLEC4M;CLEC4M;CLEC4M      | 9.43E-06          | 9.43E-06             | 0.062618           | -15.9699                     | T down vs N                            | 40.472  | 71.9022   | 28.4255    | 1         |
| cg11616651                                                                              | AMH                          | 8.33E-05          | 8.33E-05             | 7.12074            | 7.12074                      | T up vs N                              | 27.304  | 36.0917   | 21.1499    | 1         |
| cg11617938                                                                              | HLA-F;HLA-F;HLA-F            | 0.00027702        | 0.000277016          | 4.80834            | 4.80834                      | T up vs N                              | 21.454  | 23.097    | 17.2254    | 1         |
| cg11617964                                                                              | PRRT1                        | 0.00016141        | 0.000161409          | 4.93079            | 4.93079                      | T up vs N                              | 23.974  | 23.8427   | 15.9125    | 1         |
| cg11618577                                                                              | KRTCAP3;KRTCAP3              | 0.00017716        | 0.000177164          | 3.38013            | 3.38013                      | T up vs N                              | 23.527  | 13.893    | 9.44827    | 1         |
| cg11619961                                                                              | CD74;CD74;CD74               | 2.87E-05          | 2.87E-05             | 0.258873           | -3.86289                     | T down vs N                            | 34.915  | 16.0995   | 6.91665    | 1         |
| cg11624309                                                                              | CD79A;CD79A;CD79A;CD79A      | 9.29E-06          | 9.29E-06             | 0.305514           | -3.27317                     | T down vs N                            | 40.578  | 13.1691   | 5.19261    | 1         |
| cg11624728                                                                              | SLC7A14                      | 0.00010962        | 0.000109615          | 0.29186            | -3.42629                     | T down vs N                            | 25.889  | 14.2042   | 8.77864    | 1         |
| cg11629889                                                                              | CNTNAP1                      | 1.01E-05          | 1.01E-05             | 4.87559            | 4.87559                      | T up vs N                              | 39.985  | 23.5074   | 9.40655    | 1         |
| cg11631011                                                                              | CCDC70                       | 2.27E-05          | 2.27E-05             | 0.211933           | -4.71848                     | T down vs N                            | 34.732  | 22.5454   | 10.3859    | 1         |
| cg11632592                                                                              | TSGA14                       | 0.00016637        | 0.000166369          | 0.197739           | -5.05718                     | T down vs N                            | 23.828  | 24.6051   | 16.5219    | 1         |
| cg11639130                                                                              | STX2;STX2                    | 0.00182966        | 0.00182966           | 7.24067            | 7.24067                      | T up vs N                              | 13.9    | 36.7085   | 42.2535    | 1         |
| cg11639168                                                                              | POM121                       | 0.00413493        | 0.00413493           | 0.241636           | -4.13846                     | T down vs N                            | 11.17   | 18.8945   | 27.0643    | 1         |
| cg11641613                                                                              | PSG9                         | 0.00013199        | 0.000131989          | 0.206971           | -4.83159                     | T down vs N                            | 24.958  | 23.2391   | 14.8982    | 1         |
| cg11647421                                                                              | LRRCS6                       | 0.00293765        | 0.00293765           | 5.86192            | 5.86192                      | T up vs N                              | 12.279  | 29.2928   | 38.1693    | 1         |

| Probeset ID                                                                                     | UCSC_REFGENE_NAME          | p-value<br>(Type) | p-value (T vs.<br>N) | Ratio (T<br>vs. N) | Fold-<br>Change (T<br>vs. N) | Fold-Change (T vs.<br>N) (Description) | F(Type) | SS (Type) | SS (Error) | F (Error) |
|-------------------------------------------------------------------------------------------------|----------------------------|-------------------|----------------------|--------------------|------------------------------|----------------------------------------|---------|-----------|------------|-----------|
| cg11647481                                                                                      | FO XK1                     | 0.0024071         | 0.0024071            | 3.53218            | 3.53218                      | T up vs N                              | 12.949  | 14.915    | 18.4295    | 1         |
| cg11648740                                                                                      | FLJ35220;FLJ35220          | 2.80E-07          | 2.80E-07             | 0.297135           | -3.36547                     | T down vs N                            | 71.023  | 13.794    | 3.1075     | 1         |
| cg11650648                                                                                      | GLP2R                      | 1.42E-05          | 1.42E-05             | 0.260941           | -3.83229                     | T down vs N                            | 37.728  | 16.9049   | 7.16916    | 1         |
| cg11654011                                                                                      | CEACAM8                    | 8.80E-05          | 8.80E-05             | 0.182934           | -5.46644                     | T down vs N                            | 27.021  | 27.0245   | 16.0023    | 1         |
| PCDHGA4;PCDHGB5;PCDHGA6;PCDHG<br>A1;PCDHGA8;PCDHGA5;PCDHGB1;PC<br>DHGB5;PCDHGB4;PCDHGA3;PCDHGA2 |                            |                   |                      |                    |                              |                                        |         |           |            |           |
| cg11655243                                                                                      |                            | 0.00028865        | 0.000288646          | 4.31784            | 4.31784                      | T up vs N                              | 21.269  | 20.0403   | 15.0757    | 1         |
| cg11655410                                                                                      | MAGI2                      | 0.00055206        | 0.000552055          | 0.218403           | -4.57868                     | T down vs N                            | 18.48   | 21.6798   | 18.7708    | 1         |
| cg11656547                                                                                      | MAMDC2;MAMDC2              | 0.00051786        | 0.000517863          | 9.00437            | 9.00437                      | T up vs N                              | 18.744  | 45.2379   | 38.6145    | 1         |
| cg11656553                                                                                      | DAZAP1;DAZAP1              | 0.00054829        | 0.000548285          | 3.5445             | 3.5445                       | T up vs N                              | 18.508  | 14.9974   | 12.9652    | 1         |
| cg11660879                                                                                      | CACNA1A;CACNA1A            | 8.93E-07          | 8.93E-07             | 0.121503           | -8.23028                     | T down vs N                            | 59.432  | 41.613    | 11.2028    | 1         |
| cg11662345                                                                                      | HEPH                       | 3.62E-05          | 3.62E-05             | 0.095491           | -10.4722                     | T down vs N                            | 31.92   | 51.6687   | 25.8994    | 1         |
| cg11663600                                                                                      | MST1R                      | 1.64E-05          | 1.64E-05             | 3.77392            | 3.77392                      | T up vs N                              | 36.795  | 16.5208   | 7.18394    | 1         |
| cg11668917                                                                                      | SNORA80B;ODC1              | 0.0008154         | 0.000815398          | 0.325607           | -3.07118                     | T down vs N                            | 16.91   | 11.7922   | 11.1574    | 1         |
| cg11669284                                                                                      | WDR70                      | 0.0002469         | 0.000246903          | 0.195965           | -5.10296                     | T down vs N                            | 21.976  | 24.8795   | 18.1137    | 1         |
| cg11669516                                                                                      | IGFBP2                     | 0.0006448         | 0.000644799          | 0.291541           | -3.43004                     | T down vs N                            | 17.845  | 14.2294   | 12.758     | 1         |
| cg11669998                                                                                      | CRTC1;CRTC1                | 3.67E-05          | 3.67E-05             | 0.237018           | -4.21908                     | T down vs N                            | 31.846  | 19.4114   | 9.75255    | 1         |
| cg11671265                                                                                      | CNOT6L                     | 1.87E-05          | 1.87E-05             | 0.275254           | -3.63301                     | T down vs N                            | 35.951  | 15.5877   | 6.93723    | 1         |
| cg11675245                                                                                      | BR53                       | 0.0003832         | 0.000383195          | 0.254178           | -3.93425                     | T down vs N                            | 20.022  | 17.5722   | 14.0426    | 1         |
| cg11676622                                                                                      | RPL5;SNORD21               | 0.0004474         | 0.000447403          | 0.213806           | -4.67714                     | T down vs N                            | 19.359  | 22.2904   | 18.4232    | 1         |
| cg11680055                                                                                      | GSTM1;GSTM1                | 0.00102454        | 0.00102454           | 5.74342            | 5.74342                      | T up vs N                              | 16.028  | 28.6202   | 28.5707    | 1         |
| cg11680118                                                                                      | KIAA1383                   | 0.00023251        | 0.000232512          | 0.259372           | -3.85546                     | T down vs N                            | 22.252  | 17.057    | 12.2646    | 1         |
| cg11683663                                                                                      | ELANE                      | 1.44E-05          | 1.44E-05             | 0.192049           | -5.20699                     | T down vs N                            | 37.64   | 25.4994   | 10.8392    | 1         |
| cg11684450                                                                                      | CIRBP;CIRBP;CIRBP          | 8.83E-05          | 8.83E-05             | 3.86633            | 3.86633                      | T up vs N                              | 27.003  | 17.1282   | 10.1488    | 1         |
| cg11685316                                                                                      | MFSD6L;MFSD6L              | 0.00166167        | 0.00166167           | 5.03028            | 5.03028                      | T up vs N                              | 14.243  | 24.4435   | 27.4596    | 1         |
| cg11687330                                                                                      | OPCML                      | 0.00144074        | 0.00144074           | 11.6397            | 11.6397                      | T up vs N                              | 14.758  | 56.4237   | 61.1739    | 1         |
| cg11688990                                                                                      | PSMG2;CEP76                | 0.00019148        | 0.000191481          | 0.263901           | -3.7893                      | T down vs N                            | 23.158  | 16.6222   | 11.4844    | 1         |
| cg11690886                                                                                      | TERT;TERT                  | 2.68E-05          | 2.68E-05             | 0.221512           | -4.51444                     | T down vs N                            | 33.716  | 21.2789   | 10.0981    | 1         |
| cg11693709                                                                                      | PAK6;PAK6;PAK6             | 0.00093714        | 0.00093714           | 0.163796           | -6.10517                     | T down vs N                            | 16.369  | 30.6552   | 29.9636    | 1         |
| cg11700356                                                                                      | GNMB;GNMB                  | 4.41E-06          | 4.41E-06             | 6.86132            | 6.86132                      | T up vs N                              | 45.995  | 34.7399   | 12.0847    | 1         |
| cg11700490                                                                                      | PON3                       | 0.00083461        | 0.000834609          | 0.308227           | -3.24436                     | T down vs N                            | 16.819  | 12.9734   | 12.3416    | 1         |
| cg11700800                                                                                      | FLJ42709;FLJ42709;FLJ42709 | 0.00068865        | 0.000688648          | 3.96               | 3.96                         | T up vs N                              | 17.58   | 17.74     | 16.1452    | 1         |
| cg11702456                                                                                      | SP100;SP100;SP100;SP100    | 3.27E-06          | 3.27E-06             | 0.144524           | -6.91929                     | T down vs N                            | 48.316  | 35.0441   | 11.605     | 1         |
| cg11704005                                                                                      | PAX7;PAX7;PAX7             | 2.64E-07          | 2.64E-07             | 0.142474           | -7.01884                     | T down vs N                            | 71.693  | 35.5636   | 7.93685    | 1         |
| cg11704631                                                                                      | RUNX1                      | 1.05E-05          | 1.05E-05             | 0.270951           | -3.69071                     | T down vs N                            | 39.722  | 15.9708   | 6.43303    | 1         |
| cg11713493                                                                                      | PLD6                       | 0.00108923        | 0.00108923           | 0.32272            | -3.09866                     | T down vs N                            | 15.795  | 11.9802   | 12.1354    | 1         |
| cg11714200                                                                                      | HMHA1                      | 0.00049154        | 0.000491542          | 0.232008           | -4.3102                      | T down vs N                            | 18.962  | 19.9918   | 16.8689    | 1         |
| cg11719509                                                                                      | GPR119                     | 0.00358901        | 0.00358901           | 0.288927           | -3.46109                     | T down vs N                            | 11.623  | 14.4382   | 19.8748    | 1         |
| cg11721194                                                                                      | SLAMF7                     | 0.00229839        | 0.00229839           | 0.247853           | -4.03466                     | T down vs N                            | 13.107  | 18.2247   | 22.2478    | 1         |
| cg11723066                                                                                      | JAM3                       | 1.60E-05          | 1.60E-05             | 0.174918           | -5.71697                     | T down vs N                            | 36.937  | 28.4692   | 12.3321    | 1         |
| cg11723077                                                                                      | SYNJ2                      | 1.26E-05          | 1.26E-05             | 0.273249           | -3.65967                     | T down vs N                            | 38.526  | 15.7649   | 6.54729    | 1         |
| cg11723801                                                                                      | NES                        | 0.0015918         | 0.0015918            | 0.073091           | -13.6815                     | T down vs N                            | 14.397  | 64.0991   | 71.2379    | 1         |
| cg11724134                                                                                      | RNF39;RNF39                | 0.00012458        | 0.000124577          | 8.0281             | 8.0281                       | T up vs N                              | 25.245  | 40.6367   | 25.7551    | 1         |
| LOC284798;LOC284798;LOC284798                                                                   |                            |                   |                      |                    |                              |                                        |         |           |            |           |
| cg11724135                                                                                      |                            | 1.16E-05          | 1.16E-05             | 9.14797            | 9.14797                      | T up vs N                              | 39.037  | 45.8916   | 18.8094    | 1         |
| cg11725400                                                                                      | OR5AU1                     | 1.44E-05          | 1.44E-05             | 0.223746           | -4.46936                     | T down vs N                            | 37.614  | 20.9965   | 8.93146    | 1         |
| cg11726250                                                                                      | COL20A1                    | 0.00072529        | 0.000725287          | 0.303931           | -3.29022                     | T down vs N                            | 17.373  | 13.2847   | 12.2346    | 1         |
| cg11726288                                                                                      | CLCN6                      | 0.00116532        | 0.00116532           | 0.329118           | -3.03842                     | T down vs N                            | 15.541  | 11.5679   | 11.9093    | 1         |
| cg11728747                                                                                      | CPVL;CPVL                  | 0.00043763        | 0.000437629          | 0.329326           | -3.0365                      | T down vs N                            | 19.452  | 11.5547   | 9.50411    | 1         |
| cg11729848                                                                                      | GRXCR2                     | 2.07E-05          | 2.07E-05             | 0.23027            | -4.34273                     | T down vs N                            | 35.304  | 20.1981   | 9.15395    | 1         |
| cg11730559                                                                                      | TRPS1                      | 0.00077359        | 0.00077359           | 3.54408            | 3.54408                      | T up vs N                              | 17.118  | 14.9945   | 14.0156    | 1         |
| cg11731300                                                                                      | TSTD1;TSTD1;TSTD1          | 0.00029984        | 0.000299839          | 8.16916            | 8.16916                      | T up vs N                              | 21.099  | 41.3191   | 31.3337    | 1         |
| cg11732925                                                                                      | MYO7B                      | 1.42E-05          | 1.42E-05             | 0.188017           | -5.31868                     | T down vs N                            | 37.731  | 26.1596   | 11.0932    | 1         |
| cg11734401                                                                                      | STXBP6                     | 0.00371867        | 0.00371867           | 3.66865            | 3.66865                      | T up vs N                              | 11.509  | 15.8245   | 21.9995    | 1         |
| cg11736940                                                                                      | PKLR;PKLR                  | 9.78E-05          | 9.78E-05             | 4.04188            | 4.04188                      | T up vs N                              | 26.469  | 18.2715   | 11.0448    | 1         |
| cg11740921                                                                                      | NPC2                       | 1.58E-05          | 1.58E-05             | 0.168141           | -5.9474                      | T down vs N                            | 37.006  | 29.7743   | 12.8732    | 1         |
| cg11741004                                                                                      | CD47;CD47;CD47             | 5.62E-05          | 5.62E-05             | 3.63426            | 3.63426                      | T up vs N                              | 29.428  | 15.596    | 8.47958    | 1         |
| IMPDH1;IMPDH1;IMPDH1;IMPDH1;IM<br>PDH1;IMPDH1;IMPDH1                                            |                            |                   |                      |                    |                              |                                        |         |           |            |           |
| cg11742189                                                                                      |                            | 0.0001909         | 0.000190898          | 0.318427           | -3.14044                     | T down vs N                            | 23.172  | 12.2656   | 8.46915    | 1         |
| cg11742202                                                                                      | SLC17A5                    | 0.00057068        | 0.000570682          | 0.167683           | -5.96365                     | T down vs N                            | 18.343  | 29.8655   | 26.0508    | 1         |
| cg11743000                                                                                      | JAK1                       | 0.0007691         | 0.000769102          | 0.285385           | -3.50404                     | T down vs N                            | 17.141  | 14.7265   | 13.7466    | 1         |
| cg11744116                                                                                      | TAS2R38                    | 0.00040078        | 0.000400775          | 0.316527           | -3.15928                     | T down vs N                            | 19.828  | 12.3942   | 10.0012    | 1         |
| cg11744304                                                                                      | CLDN15                     | 4.72E-05          | 4.72E-05             | 8.41777            | 8.41777                      | T up vs N                              | 30.4    | 42.5071   | 22.3724    | 1         |
| cg11747462                                                                                      | OPCML                      | 0.0002324         | 0.0002324            | 0.30903            | -3.23594                     | T down vs N                            | 22.254  | 12.9161   | 9.28626    | 1         |
| cg11747820                                                                                      | PTPRU;PTPRU;PTPRU          | 3.14E-05          | 3.14E-05             | 0.170381           | -5.86919                     | T down vs N                            | 32.761  | 29.3338   | 14.3263    | 1         |
| cg11749508                                                                                      | VPS52                      | 0.0003247         | 0.000324702          | 0.331378           | -3.0177                      | T down vs N                            | 20.745  | 11.4259   | 8.81229    | 1         |
| cg11750112                                                                                      | CACHD1                     | 1.92E-07          | 1.92E-07             | 0.201075           | -4.97327                     | T down vs N                            | 75.184  | 24.0997   | 5.12868    | 1         |
| cg11750883                                                                                      | CRCT1                      | 8.80E-05          | 8.80E-05             | 0.313934           | -3.18538                     | T down vs N                            | 27.016  | 12.5721   | 7.44565    | 1         |
| cg11750962                                                                                      | MTOR                       | 0.00052946        | 0.000529458          | 0.277784           | -3.59993                     | T down vs N                            | 18.652  | 15.3674   | 13.1821    | 1         |
| cg11753771                                                                                      | PTPN14                     | 0.0028403         | 0.0028403            | 0.271389           | -3.68475                     | T down vs N                            | 12.686  | 14.9942   | 17.7297    | 1         |
| cg11755201                                                                                      | CAMTA1                     | 0.00030173        | 0.000301727          | 0.254455           | -3.92996                     | T down vs N                            | 21.071  | 17.5442   | 13.322     | 1         |

| Probeset ID                     | UCSC_REFGENE_NAME           | p-value<br>(Type) | p-value (T vs.<br>N) | Ratio (T<br>vs. N) | Fold-<br>Change (T<br>vs. N) | Fold-Change (T vs.<br>N) (Description) | F(Type) | SS (Type) | SS (Error) | F (Error) |
|---------------------------------|-----------------------------|-------------------|----------------------|--------------------|------------------------------|----------------------------------------|---------|-----------|------------|-----------|
| cg11758793                      | GJD3;GJD3                   | 0.00161364        | 0.00161364           | 4.23976            | 4.23976                      | T up vs N                              | 14.348  | 19.5434   | 21.7942    | 1         |
| cg11760500                      | ETS1;ETS1;ETS1              | 7.69E-05          | 7.69E-05             | 0.227118           | -4.403                       | T down vs N                            | 27.73   | 20.5791   | 11.8739    | 1         |
| cg11762595                      | NLR4                        | 4.12E-05          | 4.12E-05             | 0.190193           | -5.25782                     | T down vs N                            | 31.172  | 25.8006   | 13.243     | 1         |
| cg11763509                      | BMP8A                       | 0.0020802         | 0.0020802            | 7.49318            | 7.49318                      | T up vs N                              | 13.451  | 37.9907   | 45.1906    | 1         |
| cg11766468                      | EVI5L;EVI5L                 | 7.26E-05          | 7.26E-05             | 3.0195             | 3.0195                       | T up vs N                              | 28.037  | 11.4382   | 6.52756    | 1         |
| cg11767181                      | IGSF21                      | 1.63E-05          | 1.63E-05             | 13.3081            | 13.3081                      | T up vs N                              | 36.8    | 62.7502   | 27.2825    | 1         |
| cg11767757                      | NCRNA00114                  | 0.00013015        | 0.000130153          | 0.287302           | -3.48065                     | T down vs N                            | 25.027  | 14.5696   | 9.31443    | 1         |
| cg11768167                      | HLA-F;HLA-F;HLA-F           | 6.68E-06          | 6.68E-06             | 0.149156           | -6.70437                     | T down vs N                            | 42.907  | 33.9101   | 12.6449    | 1         |
| cg11769349                      | KIAA1908;KIAA1908;KIAA1908  | 0.00011784        | 0.000117841          | 0.198414           | -5.03995                     | T down vs N                            | 25.523  | 24.5016   | 15.3595    | 1         |
| cg11770080                      | BHMT                        | 0.00012007        | 0.000120068          | 15.6175            | 15.6175                      | T up vs N                              | 25.429  | 70.7488   | 44.5147    | 1         |
| cg11772086                      | MCC;MCC                     | 6.13E-05          | 6.13E-05             | 0.274956           | -3.63695                     | T down vs N                            | 28.944  | 15.6139   | 8.6312     | 1         |
| cg11772799                      | LOC154822                   | 0.00176067        | 0.00176067           | 0.30362            | -3.29359                     | T down vs N                            | 14.036  | 13.3075   | 15.1692    | 1         |
| PCDHA2;PCDHA1;PCDHA1;PCDHA3;PC  |                             |                   |                      |                    |                              |                                        |         |           |            |           |
| cg11781306                      | DHA4;PCDHA5;PCDHA5          | 0.00169211        | 0.00169211           | 3.32754            | 3.32754                      | T up vs N                              | 14.178  | 13.5375   | 15.2775    | 1         |
| cg11781421                      | HAPLN4                      | 0.0001479         | 0.000147901          | 0.24562            | -4.07133                     | T down vs N                            | 24.398  | 18.4619   | 12.1072    | 1         |
| cg11781986                      | RIPK3                       | 0.00518779        | 0.00518779           | 3.05952            | 3.05952                      | T up vs N                              | 10.462  | 11.7124   | 17.9127    | 1         |
| cg11783356                      | WFDC10B;WFDC10B             | 0.00022716        | 0.00022716           | 0.213043           | -4.69388                     | T down vs N                            | 22.36   | 22.3938   | 16.0245    | 1         |
| cg11783901                      | IGF2BP1;IGF2BP1             | 5.88E-07          | 5.88E-07             | 0.124154           | -8.0545                      | T down vs N                            | 63.429  | 40.7649   | 10.283     | 1         |
| cg11784124                      | FRG2B                       | 6.59E-06          | 6.59E-06             | 0.32359            | -3.09033                     | T down vs N                            | 43.004  | 11.9232   | 4.43613    | 1         |
| cg11784437                      | FANK1                       | 0.00021726        | 0.00021726           | 0.314178           | -3.18291                     | T down vs N                            | 22.566  | 12.5552   | 8.90206    | 1         |
| cg11784631                      | NRM                         | 1.05E-05          | 1.05E-05             | 0.330426           | -3.0264                      | T down vs N                            | 39.756  | 11.4855   | 4.62242    | 1         |
| cg11784887                      | MFHAS1                      | 3.42E-06          | 3.42E-06             | 0.12221            | -8.18264                     | T down vs N                            | 47.952  | 41.3841   | 13.8086    | 1         |
| cg11787218                      | DUSP22                      | 0.00016883        | 0.000168833          | 0.198018           | -5.05005                     | T down vs N                            | 23.757  | 24.5623   | 16.5422    | 1         |
| cg11788486                      | ORS2M1                      | 0.00214946        | 0.00214946           | 0.228576           | -4.37492                     | T down vs N                            | 13.337  | 20.4018   | 24.4748    | 1         |
| cg11789612                      | ITPKA                       | 2.92E-05          | 2.92E-05             | 14.5557            | 14.5557                      | T up vs N                              | 33.198  | 67.1703   | 32.373     | 1         |
| cg11790580                      | S100A7A                     | 3.61E-05          | 3.61E-05             | 0.261368           | -3.82602                     | T down vs N                            | 31.937  | 16.8637   | 8.44848    | 1         |
| cg11791507                      | VN1R4                       | 0.00011237        | 0.000112371          | 0.206292           | -4.84749                     | T down vs N                            | 25.763  | 23.3361   | 14.4929    | 1         |
| cg11792285                      | OR6B2                       | 0.00447452        | 0.00447452           | 0.317365           | -3.15094                     | T down vs N                            | 10.921  | 12.3373   | 18.0746    | 1         |
| cg11793699                      | NTRK1;INSRR                 | 7.44E-06          | 7.44E-06             | 18.5138            | 18.5138                      | T up vs N                              | 42.136  | 79.7786   | 30.2938    | 1         |
| cg11798066                      | COQ2                        | 1.50E-05          | 1.50E-05             | 0.192676           | -5.19005                     | T down vs N                            | 37.365  | 25.3988   | 10.8759    | 1         |
| cg11798660                      | DNMT3A;DNMT3A;DNMT3A        | 0.00102954        | 0.00102954           | 0.284427           | -3.51584                     | T down vs N                            | 16.009  | 14.8055   | 14.797     | 1         |
| cg11798758                      | NPHP4                       | 0.00085769        | 0.000857688          | 0.251383           | -3.978                       | T down vs N                            | 16.713  | 17.857    | 17.0956    | 1         |
| cg11803392                      | PRKCA                       | 0.00138558        | 0.00138558           | 0.325442           | -3.07275                     | T down vs N                            | 14.9    | 11.8029   | 12.6741    | 1         |
| cg11803589                      | VWF                         | 2.25E-05          | 2.25E-05             | 0.21813            | -4.58442                     | T down vs N                            | 34.767  | 21.7155   | 9.99348    | 1         |
| cg11804721                      | SLC27A3                     | 8.05E-06          | 8.05E-06             | 0.242818           | -4.11831                     | T down vs N                            | 41.576  | 18.7649   | 7.22151    | 1         |
| cg11805814                      | MAGEB16                     | 5.82E-08          | 5.82E-08             | 0.140491           | -7.11791                     | T down vs N                            | 89.703  | 36.0771   | 6.43496    | 1         |
| cg11806528                      | WNT2B;WNT2B                 | 7.51E-05          | 7.51E-05             | 5.7523             | 5.7523                       | T up vs N                              | 27.854  | 28.6707   | 16.4693    | 1         |
| cg11806762                      | BDNF;BDNF;BDNF;BDNF;BDNF    | 0.0018468         | 0.0018468            | 0.315091           | -3.17369                     | T down vs N                            | 13.867  | 12.4924   | 14.4136    | 1         |
| cg11807188                      | LEPR;LEPR;LEPR              | 5.58E-05          | 5.58E-05             | 0.23563            | -4.24395                     | T down vs N                            | 29.463  | 19.5702   | 10.6275    | 1         |
| cg11810135                      | FCRL1;FCRL1;FCRL1           | 1.30E-06          | 1.30E-06             | 0.250128           | -3.99795                     | T down vs N                            | 56      | 17.9867   | 5.13904    | 1         |
| cg11810736                      | OR10A7                      | 2.85E-05          | 2.85E-05             | 0.247502           | -4.04037                     | T down vs N                            | 33.335  | 18.2617   | 8.76528    | 1         |
| cg11813690                      | CUX2                        | 0.00082384        | 0.000823841          | 0.264034           | -3.78739                     | T down vs N                            | 16.87   | 16.6096   | 15.7531    | 1         |
| cg11814446                      | LEMD3;LEMD3                 | 9.53E-06          | 9.53E-06             | 0.162359           | -6.1592                      | T down vs N                            | 40.401  | 30.9545   | 12.259     | 1         |
| cg11820931                      | DDX21                       | 3.85E-06          | 3.85E-06             | 0.136492           | -7.32645                     | T down vs N                            | 47.026  | 37.1465   | 12.6387    | 1         |
| cg11821200                      | PTGER4                      | 6.98E-06          | 6.98E-06             | 0.286146           | -3.49471                     | T down vs N                            | 42.591  | 14.6639   | 5.50874    | 1         |
| cg11823729                      | GFRAL                       | 7.69E-06          | 7.69E-06             | 0.261423           | -3.82522                     | T down vs N                            | 41.904  | 16.8585   | 6.43703    | 1         |
| cg11823736                      | IDO2                        | 0.00033139        | 0.000331391          | 0.300321           | -3.32978                     | T down vs N                            | 20.655  | 13.5526   | 10.4981    | 1         |
| cg11825302                      | KRTAP9-2                    | 2.81E-07          | 2.81E-07             | 0.154488           | -6.47298                     | T down vs N                            | 71      | 32.6698   | 7.3622     | 1         |
| cg11827097                      | SP100;SP100;SP100;SP100     | 6.84E-07          | 6.84E-07             | 0.279917           | -3.57249                     | T down vs N                            | 61.958  | 15.1844   | 3.92122    | 1         |
| cg11827910                      | PAX6;PAX6;PAX6              | 0.00360988        | 0.00360988           | 3.91107            | 3.91107                      | T up vs N                              | 11.605  | 17.4209   | 24.0192    | 1         |
| cg11827925                      | AQP1;AQP1                   | 0.00012941        | 0.000129405          | 0.296111           | -3.37711                     | T down vs N                            | 25.056  | 13.8726   | 8.85869    | 1         |
| cg11829253                      | PSTPIP1                     | 1.31E-05          | 1.31E-05             | 5.40438            | 5.40438                      | T up vs N                              | 38.24   | 26.6624   | 11.1557    | 1         |
| cg11829608                      | YOD1                        | 2.91E-05          | 2.91E-05             | 0.312501           | -3.19999                     | T down vs N                            | 33.203  | 12.6716   | 6.10618    | 1         |
| TRIM6-                          |                             |                   |                      |                    |                              |                                        |         |           |            |           |
| cg11831003                      | TRIM34;TRIM34;TRIM34;TRIM34 | 6.89E-07          | 6.89E-07             | 0.12609            | -7.93083                     | T down vs N                            | 61.881  | 40.1624   | 10.3844    | 1         |
| cg11833293                      | SHANK2                      | 4.14E-06          | 4.14E-06             | 4.68721            | 4.68721                      | T up vs N                              | 46.464  | 22.3526   | 7.69718    | 1         |
| cg11834527                      | MAGEA8;MAGEA8;MAGEA8        | 7.56E-06          | 7.56E-06             | 0.262733           | -3.80615                     | T down vs N                            | 42.027  | 16.7331   | 6.37042    | 1         |
| cg11835347                      | RHOC;RHOC;RHOC              | 0.00015382        | 0.000153824          | 0.255144           | -3.91936                     | T down vs N                            | 24.207  | 17.475    | 11.5505    | 1         |
| cg11837701                      | ICA1;ICA1;ICA1              | 0.0004912         | 0.000491199          | 0.284047           | -3.52054                     | T down vs N                            | 18.965  | 14.8371   | 12.5174    | 1         |
| cg11841164                      | PSMD13;PSMD13               | 0.00229257        | 0.00229257           | 0.238296           | -4.19646                     | T down vs N                            | 13.115  | 19.2666   | 23.5041    | 1         |
| cg11841652                      | MEX3D                       | 0.00304691        | 0.00304691           | 0.308644           | -3.23997                     | T down vs N                            | 12.158  | 12.9436   | 17.0335    | 1         |
| cg11843238                      | PDLIM4;PDLIM4               | 5.41E-05          | 5.41E-05             | 19.77              | 19.77                        | T up vs N                              | 29.64   | 83.4078   | 45.0251    | 1         |
| cg11845111                      | TMEM194B                    | 0.00035955        | 0.000359545          | 0.251544           | -3.97544                     | T down vs N                            | 20.298  | 17.8404   | 14.0627    | 1         |
| cg11848324                      | OR4K1                       | 4.99E-05          | 4.99E-05             | 0.208001           | -4.80766                     | T down vs N                            | 30.085  | 23.0928   | 12.2815    | 1         |
| cg11850508                      | CARD14;CARD14               | 3.76E-05          | 3.76E-05             | 0.191544           | -5.22075                     | T down vs N                            | 31.694  | 25.581    | 12.9139    | 1         |
| CDK11A;CDK11B;CDK11B;CDK11B;CDK |                             |                   |                      |                    |                              |                                        |         |           |            |           |
| cg11851198                      | 11B;CDK11A;CDK11B;CDK11B    | 2.84E-05          | 2.84E-05             | 0.261907           | -3.81815                     | T down vs N                            | 33.353  | 16.812    | 8.06495    | 1         |
| cg11852212                      | GNA11                       | 0.00031838        | 0.000318383          | 0.310019           | -3.22561                     | T down vs N                            | 20.832  | 12.8459   | 9.8662     | 1         |
| cg11852794                      | CATSPERB                    | 3.03E-06          | 3.03E-06             | 0.187996           | -5.31925                     | T down vs N                            | 48.914  | 26.163    | 8.55798    | 1         |
| cg11853788                      | TDRD5                       | 0.00066289        | 0.000662888          | 5.04224            | 5.04224                      | T up vs N                              | 17.734  | 24.5153   | 22.1187    | 1         |
| cg11854007                      | BASE                        | 9.18E-06          | 9.18E-06             | 0.146521           | -6.82496                     | T down vs N                            | 40.659  | 34.5485   | 13.5953    | 1         |
| cg11854392                      | TXNRD2                      | 1.41E-05          | 1.41E-05             | 0.313589           | -3.18888                     | T down vs N                            | 37.763  | 12.596    | 5.3369     | 1         |

| Probeset ID | UCSC_REFGENE_NAME                                                                       | p-value<br>(Type) | p-value (T vs.<br>N) | Ratio (T<br>vs. N) | Fold-<br>Change (T<br>vs. N) | Fold-Change (T vs.<br>N) (Description) | F(Type) | SS (Type) | SS (Error) | F (Error) |
|-------------|-----------------------------------------------------------------------------------------|-------------------|----------------------|--------------------|------------------------------|----------------------------------------|---------|-----------|------------|-----------|
| cg11855156  | KLK5;KLK5;KLK5                                                                          | 0.00274347        | 0.00274347           | 0.286644           | -3.48865                     | T down vs N                            | 12.507  | 14.6233   | 18.7072    | 1         |
| cg11855664  | ISX                                                                                     | 6.51E-06          | 6.51E-06             | 0.225591           | -4.4328                      | T down vs N                            | 43.091  | 20.7668   | 7.71079    | 1         |
| cg11857514  | TMEM120B                                                                                | 0.00118677        | 0.00118677           | 0.283258           | -3.53035                     | T down vs N                            | 15.473  | 14.9027   | 15.4101    | 1         |
| cg11859594  | CYTH1;CYTH1                                                                             | 4.72E-06          | 4.72E-06             | 0.229579           | -4.3558                      | T down vs N                            | 45.473  | 20.2809   | 7.13605    | 1         |
| cg11860977  | HCG18;HCG18                                                                             | 0.00074784        | 0.000747839          | 0.207755           | -4.81336                     | T down vs N                            | 17.252  | 23.1277   | 21.4499    | 1         |
| cg11861579  | C4orf37                                                                                 | 0.00045866        | 0.000458662          | 0.287177           | -3.48218                     | T down vs N                            | 19.253  | 14.5798   | 12.1162    | 1         |
| cg11863058  | ATG16L2                                                                                 | 0.00415313        | 0.00415313           | 3.10585            | 3.10585                      | T up vs N                              | 11.156  | 12.0293   | 17.2522    | 1         |
| cg11865119  | MEST                                                                                    | 7.44E-05          | 7.44E-05             | 7.16376            | 7.16376                      | T up vs N                              | 27.9    | 36.3135   | 20.8252    | 1         |
| cg11868356  | ETV4;ETV4                                                                               | 0.00018557        | 0.000185566          | 0.186828           | -5.35251                     | T down vs N                            | 23.306  | 26.3585   | 18.0953    | 1         |
| cg11869193  | RAP1GAP2;RAP1GAP2                                                                       | 0.00082618        | 0.000826183          | 0.169679           | -5.89347                     | T down vs N                            | 16.859  | 29.4709   | 27.9696    | 1         |
| cg11872672  | PTPRN2;PTPRN2;PTPRN2                                                                    | 0.00025715        | 0.000257154          | 0.29554            | -3.38364                     | T down vs N                            | 21.791  | 13.9167   | 10.2184    | 1         |
| cg11873147  | C1QL2                                                                                   | 0.00238777        | 0.00238777           | 4.58549            | 4.58549                      | T up vs N                              | 12.976  | 21.7221   | 26.7838    | 1         |
| cg11874272  | CD86                                                                                    | 3.02E-05          | 3.02E-05             | 0.258058           | -3.87511                     | T down vs N                            | 32.99   | 17.1857   | 8.33491    | 1         |
| cg11874882  | ACCN1                                                                                   | 0.00070422        | 0.000704218          | 0.28645            | -3.49101                     | T down vs N                            | 17.491  | 14.6391   | 13.3913    | 1         |
| cg11875085  | LRRC14                                                                                  | 0.00082201        | 0.000822013          | 6.39828            | 6.39828                      | T up vs N                              | 16.879  | 32.265    | 30.5854    | 1         |
| cg11875268  | SMUG1                                                                                   | 0.00109307        | 0.00109307           | 0.187827           | -5.32405                     | T down vs N                            | 15.782  | 26.1912   | 30.5528    | 1         |
| cg11876013  | SCHIP1                                                                                  | 1.58E-05          | 1.58E-05             | 16.4316            | 16.4316                      | T up vs N                              | 38.93   | 69.0721   | 26.6143    | 1         |
|             |                                                                                         |                   |                      |                    |                              |                                        |         |           |            |           |
| cg11876705  | RASGRP4;RASGRP4;RASGRP4;RASGRP4                                                         | 2.33E-05          | 2.33E-05             | 0.24228            | -4.12746                     | T down vs N                            | 34.567  | 18.8238   | 8.71303    | 1         |
| cg11877061  | VAX2                                                                                    | 0.00014148        | 0.000141482          | 0.196877           | -5.07932                     | T down vs N                            | 24.615  | 24.7379   | 16.0797    | 1         |
| cg11879776  | CST8                                                                                    | 3.43E-06          | 3.43E-06             | 0.254912           | -3.92292                     | T down vs N                            | 47.925  | 17.4983   | 5.84194    | 1         |
| cg11881472  | PRR5L;PRR5L;PRR5L;PRR5L                                                                 | 0.0002033         | 0.000203296          | 0.243758           | -4.10242                     | T down vs N                            | 22.876  | 18.6626   | 13.053     | 1         |
| cg11882488  | BOC                                                                                     | 0.00029487        | 0.00029487           | 0.222909           | -4.48613                     | T down vs N                            | 21.924  | 19.8604   | 13.5885    | 1         |
|             |                                                                                         |                   |                      |                    |                              |                                        |         |           |            |           |
| cg11883238  | RHOBTB1;RHOBTB1;RHOBTB1;RHOBTB1                                                         | 1.56E-05          | 1.56E-05             | 0.262037           | -3.81625                     | T down vs N                            | 37.109  | 16.7995   | 7.24341    | 1         |
| cg11886358  | FLI1                                                                                    | 4.47E-05          | 4.47E-05             | 0.284769           | -3.51162                     | T down vs N                            | 30.709  | 14.7773   | 7.69938    | 1         |
| cg11890795  | UBE3B;UBE3B                                                                             | 0.00127187        | 0.00127187           | 0.322009           | -3.1055                      | T down vs N                            | 15.216  | 12.027    | 12.647     | 1         |
| cg11892240  | NPY                                                                                     | 8.51E-06          | 8.51E-06             | 0.309347           | -3.23261                     | T down vs N                            | 41.185  | 12.8936   | 5.00909    | 1         |
| cg11898425  | CCNB3;CCNB3                                                                             | 0.00226419        | 0.00226419           | 0.317336           | -3.15123                     | T down vs N                            | 13.158  | 12.3392   | 15.0042    | 1         |
| cg11902777  | AHRR                                                                                    | 3.37E-06          | 3.37E-06             | 0.19803            | -5.04974                     | T down vs N                            | 48.07   | 24.5604   | 8.17489    | 1         |
| cg11903920  | TCERG1L                                                                                 | 0.0009212         | 0.000921195          | 0.285002           | -3.50875                     | T down vs N                            | 16.436  | 14.7581   | 14.367     | 1         |
| cg11904204  | ZNF701                                                                                  | 0.00037326        | 0.000373264          | 3.92941            | 3.92941                      | T up vs N                              | 20.135  | 17.5406   | 13.9382    | 1         |
| cg11904429  | CD70                                                                                    | 0.00612574        | 0.00612574           | 0.330398           | -3.02666                     | T down vs N                            | 9.9564  | 11.4873   | 18.4601    | 1         |
|             |                                                                                         |                   |                      |                    |                              |                                        |         |           |            |           |
| cg11904906  | LOC151174;LOC643387;LOC151174                                                           | 0.00019692        | 0.000196918          | 20.1288            | 20.1288                      | T up vs N                              | 23.026  | 84.4163   | 58.6584    | 1         |
| cg11906361  | MYO1H                                                                                   | 0.00265319        | 0.00265319           | 0.283242           | -3.53055                     | T down vs N                            | 12.619  | 14.904    | 18.8968    | 1         |
|             |                                                                                         |                   |                      |                    |                              |                                        |         |           |            |           |
| cg11907797  | PCDHGA4;PCDHGA7;PCDHGA6;PCDHGA5;PCDHGA5;PCDHGB1;PCDHGA3;PCDHGA2;PCDHGB2;PCDHGA7;PCDHGB3 | 0.00033187        | 0.000331869          | 4.85271            | 4.85271                      | T up vs N                              | 20.649  | 23.368    | 18.1068    | 1         |
| cg11913917  | TEX13A;IL1RAPL2                                                                         | 0.00128822        | 0.00128822           | 0.301192           | -3.32014                     | T down vs N                            | 15.168  | 13.4874   | 14.227     | 1         |
| cg11919479  | PAFAH1B3;PAFAH1B3;PAFAH1B3                                                              | 9.28E-06          | 9.28E-06             | 0.222144           | -4.50158                     | T down vs N                            | 40.588  | 21.1985   | 8.3565     | 1         |
| cg11924499  | NELL1;NELL1                                                                             | 0.00011968        | 0.000119683          | 0.31561            | -3.16846                     | T down vs N                            | 25.446  | 12.4568   | 7.83278    | 1         |
| cg11924832  | BTBD9;BTBD9                                                                             | 0.00012249        | 0.000122493          | 0.303654           | -3.29322                     | T down vs N                            | 25.329  | 13.3051   | 8.40454    | 1         |
| cg11926150  | EGFL6;EGFL6                                                                             | 0.00200703        | 0.00200703           | 0.28911            | -3.45889                     | T down vs N                            | 13.576  | 14.4234   | 16.9994    | 1         |
| cg11927951  | SPAG6;SPAG6                                                                             | 0.00236285        | 0.00236285           | 0.321561           | -3.10983                     | T down vs N                            | 13.012  | 12.0565   | 14.825     | 1         |
|             |                                                                                         |                   |                      |                    |                              |                                        |         |           |            |           |
| cg11928275  | NFATC1;NFATC1;NFATC1;NFATC1;NFATC1                                                      | 1.80E-05          | 1.80E-05             | 16.7385            | 16.7385                      | T up vs N                              | 36.175  | 74.3627   | 32.8902    | 1         |
| cg11931953  | TC1                                                                                     | 0.00090463        | 0.000904632          | 4.38285            | 4.38285                      | T up vs N                              | 16.506  | 20.4519   | 19.8253    | 1         |
| cg11932113  | FOXK1                                                                                   | 0.00090463        | 0.000904632          | 4.38285            | 4.38285                      | T up vs N                              | 16.506  | 20.4519   | 19.8253    | 1         |
| cg11932113  | PLXNA4;PLXNA4;PLXNA4                                                                    | 4.61E-05          | 4.61E-05             | 0.283508           | -3.52724                     | T down vs N                            | 30.53   | 14.8819   | 7.79927    | 1         |
| cg11934819  | SIRPB2;SIRPB2;SIRPB2;SIRPB2                                                             | 0.0005011         | 0.000501103          | 0.220043           | -4.54456                     | T down vs N                            | 18.882  | 21.4671   | 18.191     | 1         |
| cg11935638  | EHHADH;EHHADH                                                                           | 0.00012568        | 0.00012568           | 0.311417           | -3.21113                     | T down vs N                            | 25.201  | 12.7474   | 8.09325    | 1         |
| cg11937241  | PABPC4L                                                                                 | 0.00067609        | 0.000676088          | 0.320212           | -3.12293                     | T down vs N                            | 17.654  | 12.1461   | 11.0079    | 1         |
| cg11940285  | TRH;TRH                                                                                 | 1.28E-05          | 1.28E-05             | 14.333             | 14.333                       | T up vs N                              | 38.417  | 66.3989   | 27.6539    | 1         |
| cg11942206  | PSG1                                                                                    | 0.00704812        | 0.00704812           | 0.19042            | -5.25155                     | T down vs N                            | 9.724   | 24.248    | 37.4042    | 1         |
| cg11942450  | MYADML                                                                                  | 0.00489993        | 0.00489993           | 0.325064           | -3.07632                     | T down vs N                            | 10.638  | 11.8274   | 17.7888    | 1         |
| cg11942603  | ANXA4                                                                                   | 0.00034936        | 0.000349363          | 0.23868            | -4.18972                     | T down vs N                            | 20.424  | 19.2235   | 15.0598    | 1         |
| cg11943008  | FBXW8;FBXW8                                                                             | 0.00019329        | 0.000193286          | 0.221595           | -4.51273                     | T down vs N                            | 23.114  | 21.2682   | 14.7226    | 1         |
| cg11943209  | OSR1                                                                                    | 0.00014507        | 0.000145071          | 4.09589            | 4.09589                      | T up vs N                              | 24.493  | 18.6205   | 12.164     | 1         |
| cg11945824  | PRRT1                                                                                   | 0.0005528         | 0.000552798          | 4.20244            | 4.20244                      | T up vs N                              | 18.474  | 19.3049   | 16.7196    | 1         |
| cg11946459  | HLA-A                                                                                   | 5.64E-05          | 5.64E-05             | 0.181718           | -5.50304                     | T down vs N                            | 29.402  | 27.2373   | 14.8219    | 1         |
| cg11946503  | NEUROG1;NEUROG1                                                                         | 3.43E-05          | 3.43E-05             | 0.232668           | -4.29798                     | T down vs N                            | 32.237  | 19.9142   | 9.88387    | 1         |
| cg11946963  | NCAM1;NCAM1                                                                             | 0.00202265        | 0.00202265           | 3.49188            | 3.49188                      | T up vs N                              | 13.549  | 14.645    | 17.2949    | 1         |
| cg11947493  | TNFRSF10D;TNFRSF10D                                                                     | 2.31E-05          | 2.31E-05             | 6.38606            | 6.38606                      | T up vs N                              | 34.623  | 32.1985   | 14.8795    | 1         |
| cg11948159  | SSRP1                                                                                   | 9.87E-08          | 9.87E-08             | 0.192981           | -5.18186                     | T down vs N                            | 83.016  | 25.3501   | 4.88582    | 1         |
| cg11949335  | TTC22                                                                                   | 0.00174174        | 0.00174174           | 5.39178            | 5.39178                      | T up vs N                              | 14.075  | 26.5887   | 30.2257    | 1         |
| cg11950860  | KPRP                                                                                    | 4.16E-05          | 4.16E-05             | 0.130089           | -7.68704                     | T down vs N                            | 31.114  | 38.9605   | 20.0347    | 1         |
| cg11951974  | CPZ;CPZ;CPZ                                                                             | 3.00E-09          | 3.00E-09             | 0.05266            | -18.9899                     | T down vs N                            | 136.71  | 81.1727   | 9.50045    | 1         |
| cg11953164  | HTR1D                                                                                   | 1.11E-05          | 1.11E-05             | 0.188614           | -5.30185                     | T down vs N                            | 39.372  | 26.0605   | 10.5905    | 1         |
| cg11953824  | C9orf6;IKBKAP                                                                           | 4.67E-05          | 4.67E-05             | 0.19233            | -5.19939                     | T down vs N                            | 30.459  | 25.4543   | 13.3709    | 1         |
| cg11956866  | SFI1;SFI1                                                                               | 9.67E-05          | 9.67E-05             | 0.29446            | -3.39604                     | T down vs N                            | 26.527  | 14.0003   | 8.44432    | 1         |

| Probeset ID | UCSC_REFGENE_NAME                   | p-value<br>(Type) | p-value (T vs.<br>N) | Ratio (T<br>vs. N) | Fold-<br>Change (T<br>vs. N) | Fold-Change (T vs.<br>N) (Description) | F(Type) | SS (Type) | SS (Error) | F (Error) |
|-------------|-------------------------------------|-------------------|----------------------|--------------------|------------------------------|----------------------------------------|---------|-----------|------------|-----------|
| cg11957331  | TMEM145                             | 7.29E-06          | 7.29E-06             | 46.1485            | 46.1485                      | T up vs N                              | 42.286  | 137.525   | 52.0359    | 1         |
| cg11958962  | REG4;REG4;REG4                      | 3.11E-05          | 3.11E-05             | 0.155365           | -6.43646                     | T down vs N                            | 32.809  | 32.4722   | 15.8356    | 1         |
| cg11959387  | C3                                  | 7.14E-05          | 7.14E-05             | 0.159407           | -6.27325                     | T down vs N                            | 28.124  | 31.5825   | 17.9677    | 1         |
| cg11961243  | ANO2                                | 6.70E-05          | 6.70E-05             | 0.319054           | -3.13427                     | T down vs N                            | 28.465  | 12.2235   | 6.87072    | 1         |
|             | AHCYL2;AHCYL2;AHCYL2;AHCYL2;AHCYL2  |                   |                      |                    |                              |                                        |         |           |            |           |
| cg11961845  | YL2;AHCYL2                          | 3.01E-05          | 3.01E-05             | 0.229385           | -4.35948                     | T down vs N                            | 33.003  | 20.3042   | 9.84346    | 1         |
| cg11964823  | MICB                                | 0.00117189        | 0.00117189           | 5.20945            | 5.20945                      | T up vs N                              | 15.52   | 25.514    | 26.3026    | 1         |
| cg11965365  | C14orf2;C14orf2                     | 1.63E-05          | 1.63E-05             | 0.281145           | -3.55688                     | T down vs N                            | 36.836  | 15.0801   | 6.55026    | 1         |
| cg11968286  | TNFRSF19                            | 6.41E-05          | 6.41E-05             | 0.132496           | -7.5474                      | T down vs N                            | 28.707  | 38.2632   | 21.3265    | 1         |
| cg11969813  | P4HB                                | 0.0001156         | 0.000115602          | 0.112372           | -8.89902                     | T down vs N                            | 25.62   | 44.7547   | 27.95      | 1         |
| cg11970679  | DNAH11                              | 0.00058308        | 0.000583078          | 0.209578           | -4.7715                      | T down vs N                            | 18.255  | 22.8713   | 20.0463    | 1         |
| cg11976790  | DMBT1;DMBT1;DMBT1                   | 0.00039178        | 0.000391782          | 0.279519           | -3.57757                     | T down vs N                            | 19.926  | 15.2183   | 12.2199    | 1         |
| cg11977605  | RNF212;RNF212                       | 6.94E-05          | 6.94E-05             | 0.310167           | -3.22407                     | T down vs N                            | 28.278  | 12.8355   | 7.26237    | 1         |
| cg11977941  | OR6N2                               | 0.00060038        | 0.000600382          | 0.241067           | -4.14822                     | T down vs N                            | 18.135  | 18.9573   | 16.7253    | 1         |
| cg11979875  | EXOSC9;EXOSC9                       | 1.87E-06          | 1.87E-06             | 0.176897           | -5.65302                     | T down vs N                            | 52.878  | 28.103    | 8.50356    | 1         |
| cg11980898  | ATG16L1;ATG16L1                     | 9.82E-05          | 9.82E-05             | 0.32291            | -3.09684                     | T down vs N                            | 26.451  | 11.9678   | 7.39915    | 1         |
| cg11981868  | NOTCH4                              | 0.00027504        | 0.000275041          | 0.260454           | -3.83945                     | T down vs N                            | 21.486  | 16.9519   | 12.6235    | 1         |
| cg11982252  | LZTR1                               | 0.00021864        | 0.000218641          | 0.227453           | -4.39652                     | T down vs N                            | 22.537  | 20.5382   | 14.5813    | 1         |
| cg11983124  | PRDM8;PRDM8                         | 6.28E-05          | 6.28E-05             | 6.30459            | 6.30459                      | T up vs N                              | 28.817  | 31.7542   | 17.6309    | 1         |
| cg11984463  | TTC9B                               | 8.31E-06          | 8.31E-06             | 0.260115           | -3.84445                     | T down vs N                            | 41.351  | 16.9848   | 6.57197    | 1         |
| cg11988591  | RHPN1;C8orf51                       | 3.30E-05          | 3.30E-05             | 0.25411            | -3.9353                      | T down vs N                            | 32.455  | 17.579    | 8.66635    | 1         |
| cg11988985  | NAIP;NAIP;NAIP;NAIP                 | 3.21E-05          | 3.21E-05             | 0.326415           | -3.06359                     | T down vs N                            | 32.633  | 11.7402   | 5.75624    | 1         |
| cg11991566  | SPO11;SPO11                         | 3.83E-05          | 3.83E-05             | 0.206117           | -4.85161                     | T down vs N                            | 31.596  | 23.3613   | 11.8302    | 1         |
| cg11993118  | NFATC2;NFATC2;NFATC2                | 0.00415947        | 0.00415947           | 5.23607            | 5.23607                      | T up vs N                              | 11.151  | 25.6719   | 36.8339    | 1         |
| cg11995437  | C19orf39                            | 0.00010881        | 0.000108813          | 0.324436           | -3.08227                     | T down vs N                            | 25.926  | 11.8681   | 7.32431    | 1         |
| cg11997734  | COL18A1;COL18A1;COL18A1             | 2.78E-05          | 2.78E-05             | 0.158633           | -6.30385                     | T down vs N                            | 33.484  | 31.7501   | 15.1714    | 1         |
| cg11997853  | SPAG1;SPAG1                         | 0.00020282        | 0.000202816          | 0.327354           | -3.0548                      | T down vs N                            | 22.887  | 11.6801   | 8.16531    | 1         |
| cg11999044  | PRAMEF21;PRAMEF20                   | 3.78E-07          | 3.78E-07             | 0.320547           | -3.11966                     | T down vs N                            | 67.864  | 12.1237   | 2.85836    | 1         |
| cg12000995  | KRTCAP3;KRTCAP3                     | 0.000546          | 0.000546002          | 8.49032            | 8.49032                      | T up vs N                              | 18.525  | 42.8503   | 37.0095    | 1         |
| cg12001078  | DAPP1                               | 0.00104213        | 0.00104213           | 0.245027           | -4.08118                     | T down vs N                            | 15.963  | 18.5255   | 18.5685    | 1         |
| cg12002047  | FCER2                               | 9.56E-06          | 9.56E-06             | 0.259898           | -3.84767                     | T down vs N                            | 40.381  | 17.0058   | 6.73821    | 1         |
| cg12006284  | WT1;WT1;WT1;WT1                     | 0.00091268        | 0.000912681          | 4.49736            | 4.49736                      | T up vs N                              | 16.471  | 21.172    | 20.5661    | 1         |
| cg12007053  | ADAMTS15                            | 0.0033095         | 0.0033095            | 3.71105            | 3.71105                      | T up vs N                              | 11.887  | 16.1055   | 21.6786    | 1         |
| cg12007362  | C2orf24                             | 1.02E-05          | 1.02E-05             | 0.318993           | -3.13486                     | T down vs N                            | 39.947  | 12.2275   | 4.89746    | 1         |
| cg12007399  | ZFR2;ZFR2;ZFR2                      | 0.00200068        | 0.00200068           | 3.72409            | 3.72409                      | T up vs N                              | 13.587  | 16.1918   | 19.0681    | 1         |
| cg12009856  | ACBD7                               | 8.03E-05          | 8.03E-05             | 0.306291           | -3.26487                     | T down vs N                            | 27.501  | 13.1127   | 7.62885    | 1         |
| cg12013571  | SIGLEC12                            | 9.88E-07          | 9.88E-07             | 0.25333            | -3.94743                     | T down vs N                            | 58.507  | 17.6581   | 4.82901    | 1         |
| cg12013590  | MIR518E;MIR518A1                    | 5.11E-05          | 5.11E-05             | 0.200471           | -4.98826                     | T down vs N                            | 29.95   | 24.1902   | 12.923     | 1         |
|             | C21orf56;C21orf56;C21orf56;C21orf56 |                   |                      |                    |                              |                                        |         |           |            |           |
| cg12016809  | 6                                   | 0.00115059        | 0.00115059           | 0.303176           | -3.29841                     | T down vs N                            | 15.589  | 13.3402   | 13.6919    | 1         |
| cg12017745  | EHBP1L1                             | 0.00317238        | 0.00317238           | 3.12545            | 3.12545                      | T up vs N                              | 12.025  | 12.1632   | 16.1835    | 1         |
| cg12017894  | C22orf41                            | 1.87E-06          | 1.87E-06             | 0.320348           | -3.1216                      | T down vs N                            | 52.877  | 12.137    | 3.67256    | 1         |
| cg12018098  | SPRED3                              | 3.95E-05          | 3.95E-05             | 3.94544            | 3.94544                      | T up vs N                              | 31.416  | 17.6451   | 8.98654    | 1         |
| cg12020230  | CXCL13                              | 0.00389215        | 0.00389215           | 0.327729           | -3.0513                      | T down vs N                            | 11.363  | 11.6561   | 16.4131    | 1         |
| cg12020433  | TMEM87A;TMEM87A;GANC                | 0.00061535        | 0.000615351          | 0.285547           | -3.50205                     | T down vs N                            | 18.035  | 14.7131   | 13.053     | 1         |
| cg12022102  | COL29A1;COL29A1                     | 1.04E-05          | 1.04E-05             | 0.231225           | -4.3248                      | T down vs N                            | 39.809  | 20.0845   | 8.07236    | 1         |
| cg12030031  | LOC285780;LY86                      | 2.80E-05          | 2.80E-05             | 0.317935           | -3.1453                      | T down vs N                            | 33.451  | 12.2988   | 5.88262    | 1         |
| cg12031962  | ALDH1A2;ALDH1A2                     | 0.00046313        | 0.000463131          | 0.165816           | -6.03078                     | T down vs N                            | 19.212  | 30.2412   | 25.1847    | 1         |
| cg12032655  | CD177                               | 3.51E-07          | 3.51E-07             | 0.198927           | -5.02696                     | T down vs N                            | 68.653  | 24.4235   | 5.69203    | 1         |
| cg12034086  | HCP5                                | 0.00034677        | 0.000346774          | 3.84537            | 3.84537                      | T up vs N                              | 20.456  | 16.9907   | 13.2895    | 1         |
| cg12034118  | IRF6                                | 2.97E-05          | 2.97E-05             | 34.756             | 34.756                       | T up vs N                              | 33.089  | 117.927   | 57.0234    | 1         |
| cg12034494  | BLNK;BLNK                           | 7.46E-05          | 7.46E-05             | 0.240656           | -4.15531                     | T down vs N                            | 27.89   | 19.0028   | 10.9017    | 1         |
| cg12035325  | LRBA                                | 0.00041059        | 0.000410589          | 0.328068           | -3.04815                     | T down vs N                            | 19.724  | 11.6345   | 9.43765    | 1         |
| cg12035782  | MIR1471                             | 1.31E-05          | 1.31E-05             | 0.25224            | -3.96447                     | T down vs N                            | 38.246  | 17.7691   | 7.43355    | 1         |
| cg12039689  | L1CAM;L1CAM;L1CAM                   | 0.00077934        | 0.000779343          | 0.295213           | -3.38738                     | T down vs N                            | 17.088  | 13.9419   | 13.054     | 1         |
| cg12042113  | RHCG                                | 0.00034722        | 0.000347223          | 3.16207            | 3.16207                      | T up vs N                              | 20.451  | 12.4132   | 9.71183    | 1         |
|             | CCHCR1;TCF19;CCHCR1;TCF19;CCHCR1    |                   |                      |                    |                              |                                        |         |           |            |           |
| cg12044213  | 1                                   | 5.08E-05          | 5.08E-05             | 0.232547           | -4.30021                     | T down vs N                            | 29.988  | 19.9284   | 10.6328    | 1         |
| cg12044338  | AQP10                               | 0.00016124        | 0.000161237          | 0.251186           | -3.98112                     | T down vs N                            | 23.979  | 17.8773   | 11.9287    | 1         |
| cg12044693  | BCKDHB;BCKDHB                       | 0.00015412        | 0.000154117          | 0.327779           | -3.05084                     | T down vs N                            | 24.198  | 11.6529   | 7.7052     | 1         |
| cg12050045  | GVIN1                               | 3.20E-05          | 3.20E-05             | 0.174683           | -5.72467                     | T down vs N                            | 32.648  | 28.5132   | 13.9734    | 1         |
| cg12050271  | FLJ42875                            | 0.00027172        | 0.000271718          | 4.55006            | 4.55006                      | T up vs N                              | 21.541  | 21.5014   | 15.9706    | 1         |
| cg12052265  | PDGFD;PDGFD                         | 3.81E-06          | 3.81E-06             | 14.7095            | 14.7095                      | T up vs N                              | 47.113  | 67.6985   | 22.9913    | 1         |
| cg12053155  | EFNB2                               | 0.00288666        | 0.00288666           | 6.65895            | 6.65895                      | T up vs N                              | 12.337  | 33.6683   | 43.6638    | 1         |
| cg12054698  | GBP1;GBP1                           | 0.00348669        | 0.00348669           | 0.320889           | -3.11634                     | T down vs N                            | 11.717  | 12.101    | 16.5244    | 1         |
| cg12059866  | DEGS2                               | 3.96E-06          | 3.96E-06             | 0.319145           | -3.13337                     | T down vs N                            | 46.818  | 12.2173   | 4.17527    | 1         |
| cg12060123  | TRIM78P                             | 4.57E-05          | 4.57E-05             | 0.147809           | -6.76549                     | T down vs N                            | 30.576  | 34.2343   | 17.9145    | 1         |
| cg12060422  | KAZALD1;KAZALD1                     | 0.00388604        | 0.00388604           | 0.267907           | -3.73263                     | T down vs N                            | 11.368  | 16.2483   | 22.8693    | 1         |
| cg12060877  | TTC4                                | 0.00029636        | 0.00029636           | 0.17972            | -5.56421                     | T down vs N                            | 21.151  | 27.5915   | 20.872     | 1         |
| cg12061866  | DCAF8L1                             | 0.0061672         | 0.0061672            | 0.316919           | -3.15538                     | T down vs N                            | 9.9361  | 12.3676   | 19.9154    | 1         |
| cg12065840  | COL14A1                             | 3.28E-05          | 3.28E-05             | 15.366             | 15.366                       | T up vs N                              | 32.501  | 69.9156   | 34.4194    | 1         |
| cg12067522  | BCL2L10                             | 3.01E-05          | 3.01E-05             | 5.28895            | 5.28895                      | T up vs N                              | 33.014  | 25.9844   | 12.5931    | 1         |

| Probeset ID | UCSC_REFGENE_NAME                     | p-value<br>(Type) | p-value (T vs.<br>N) | Ratio (T<br>vs. N) | Fold-<br>Change (T<br>vs. N) | Fold-Change (T vs.<br>N) (Description) | F(Type) | SS (Type) | SS (Error) | F (Error) |
|-------------|---------------------------------------|-------------------|----------------------|--------------------|------------------------------|----------------------------------------|---------|-----------|------------|-----------|
| cg12067687  | HOOK1                                 | 0.00272346        | 0.00272346           | 6.06665            | 6.06665                      | T up vs N                              | 12.532  | 30.441    | 38.8663    | 1         |
| cg12068069  | ZNF593                                | 1.10E-06          | 1.10E-06             | 0.183027           | -5.46366                     | T down vs N                            | 57.488  | 27.0083   | 7.51692    | 1         |
| cg12068816  | FAM83F                                | 1.40E-05          | 1.40E-05             | 5.08781            | 5.08781                      | T up vs N                              | 37.828  | 24.7888   | 10.4849    | 1         |
| cg12068916  | MTMR7                                 | 0.00016385        | 0.000163846          | 3.16096            | 3.16096                      | T up vs N                              | 23.902  | 12.4056   | 8.30449    | 1         |
| cg12070022  | MESTIT1;MEST;MEST                     | 2.95E-05          | 2.95E-05             | 0.230041           | -4.34704                     | T down vs N                            | 33.137  | 20.2255   | 9.76587    | 1         |
| cg12070159  | RGS20                                 | 0.00061562        | 0.000615622          | 0.230686           | -4.33489                     | T down vs N                            | 18.033  | 20.1485   | 17.8769    | 1         |
| cg12070911  | RAET1E                                | 0.00012568        | 0.000125676          | 0.302744           | -3.30312                     | T down vs N                            | 25.201  | 13.3722   | 8.48985    | 1         |
| cg12072178  | VAMP3                                 | 0.00254871        | 0.00254871           | 0.210389           | -4.75309                     | T down vs N                            | 12.755  | 22.7583   | 28.5487    | 1         |
| cg12072740  | TMEM132D                              | 5.15E-05          | 5.15E-05             | 0.193669           | -5.16344                     | T down vs N                            | 29.906  | 25.2405   | 13.5038    | 1         |
| cg12073319  | FGFBP2                                | 0.00015738        | 0.000157376          | 0.332405           | -3.00838                     | T down vs N                            | 24.096  | 11.3619   | 7.54441    | 1         |
| cg12077754  | HK2                                   | 0.00062034        | 0.000620344          | 0.250009           | -3.99985                     | T down vs N                            | 18.002  | 17.999    | 15.9973    | 1         |
| cg12080906  | NES                                   | 0.0002677         | 0.000267699          | 0.315862           | -3.16594                     | T down vs N                            | 21.608  | 12.4396   | 9.21094    | 1         |
| cg12081372  | MFAP3L;MFAP3L                         | 0.00183015        | 0.00183015           | 0.242206           | -4.12871                     | T down vs N                            | 13.899  | 18.8319   | 21.678     | 1         |
| cg12081389  | OR2W1                                 | 0.00216176        | 0.00216176           | 0.239713           | -4.17165                     | T down vs N                            | 13.318  | 19.1077   | 22.9562    | 1         |
| cg12081643  | COL4A1                                | 1.89E-05          | 1.89E-05             | 0.274087           | -3.64848                     | T down vs N                            | 35.882  | 15.6906   | 6.99648    | 1         |
| cg12082025  | ABCA7                                 | 0.001366          | 0.001366             | 3.2986             | 3.2986                       | T up vs N                              | 14.952  | 13.3415   | 14.2763    | 1         |
| cg12083217  | RAX                                   | 0.0001035         | 0.000103502          | 0.106147           | -9.42086                     | T down vs N                            | 26.181  | 47.1185   | 28.7959    | 1         |
| cg12085119  | IRS2                                  | 2.03E-06          | 2.03E-06             | 0.278529           | -3.59029                     | T down vs N                            | 52.183  | 15.3032   | 4.69217    | 1         |
| cg12085619  | OR2T3                                 | 0.00020138        | 0.000201381          | 0.234213           | -4.26961                     | T down vs N                            | 22.921  | 19.7337   | 13.7754    | 1         |
| cg12086028  | VPS52;RPS18                           | 0.00042789        | 0.000427893          | 0.164776           | -6.06883                     | T down vs N                            | 19.548  | 30.4532   | 24.9259    | 1         |
| cg12088387  | CXCR7                                 | 8.29E-06          | 8.29E-06             | 15.6431            | 15.6431                      | T up vs N                              | 41.369  | 70.8333   | 27.3958    | 1         |
| cg12088946  | TRIM6-<br>TRIM34;TRIM34;TRIM34;TRIM34 | 4.45E-05          | 4.45E-05             | 0.208664           | -4.7924                      | T down vs N                            | 30.727  | 22.9994   | 11.9763    | 1         |
| cg12089656  | NCK2;NCK2                             | 0.00013479        | 0.000134792          | 0.21282            | -4.6988                      | T down vs N                            | 24.854  | 22.4241   | 14.4359    | 1         |
| cg12090105  | L3MBTL4                               | 2.51E-05          | 2.51E-05             | 0.225875           | -4.42722                     | T down vs N                            | 34.105  | 20.7317   | 9.72593    | 1         |
| cg12093662  | ARHGAP25;ARHGAP25;ARHGAP25;AR         | 4.61E-07          | 4.61E-07             | 0.105402           | -9.48753                     | T down vs N                            | 65.852  | 47.4153   | 11.5205    | 1         |
| cg12094736  | SH3PXD2A                              | 1.16E-05          | 1.16E-05             | 0.198597           | -5.03531                     | T down vs N                            | 39.062  | 24.4737   | 10.0246    | 1         |
| cg12096528  | SLC25A41                              | 0.00032226        | 0.000322263          | 0.325135           | -3.07565                     | T down vs N                            | 20.779  | 11.8228   | 9.10381    | 1         |
| cg12097340  | SLC39A8;SLC39A8;SLC39A8;SLC39A8       | 0.00017684        | 0.000176844          | 0.310471           | -3.22092                     | T down vs N                            | 23.535  | 12.814    | 8.71131    | 1         |
| cg12097550  | ATP5G2;ATP5G2                         | 4.89E-06          | 4.89E-06             | 0.326786           | -3.06011                     | T down vs N                            | 45.212  | 11.7164   | 4.14636    | 1         |
| cg12099952  | OXT                                   | 0.00050082        | 0.00050082           | 5.57499            | 5.57499                      | T up vs N                              | 18.884  | 27.6538   | 23.4306    | 1         |
| cg12102838  | MUC2                                  | 0.00062318        | 0.000623181          | 0.218271           | -4.58147                     | T down vs N                            | 17.984  | 21.6971   | 19.304     | 1         |
| cg12105450  | CASP10;CASP10;CASP10                  | 4.72E-06          | 4.72E-06             | 0.173706           | -5.75684                     | T down vs N                            | 45.473  | 28.6966   | 10.0971    | 1         |
| cg12110262  | CYP26C1                               | 0.00070722        | 0.000707218          | 0.298679           | -3.34808                     | T down vs N                            | 17.474  | 13.6764   | 12.5229    | 1         |
| cg12112870  | E2F5;E2F5;E2F5                        | 0.00010042        | 0.000100423          | 0.209194           | -4.78024                     | T down vs N                            | 26.335  | 22.9249   | 13.9281    | 1         |
| cg12116395  | ATP6AP2                               | 5.68E-05          | 5.68E-05             | 0.084889           | -11.78                       | T down vs N                            | 29.366  | 56.9759   | 31.0432    | 1         |
| cg12117986  | MKX                                   | 4.63E-06          | 4.63E-06             | 0.239344           | -4.17809                     | T down vs N                            | 45.624  | 19.149    | 6.71535    | 1         |
| cg12119625  | LOC284379                             | 5.71E-05          | 5.71E-05             | 0.291141           | -3.43477                     | T down vs N                            | 29.338  | 14.2612   | 7.77759    | 1         |
| cg12120430  | LPP;LPP                               | 0.00297518        | 0.00297518           | 0.328776           | -3.04159                     | T down vs N                            | 12.237  | 11.5896   | 15.1535    | 1         |
| cg12121643  | DGKG;DGKG;DGKG                        | 8.12E-05          | 8.12E-05             | 4.42562            | 4.42562                      | T up vs N                              | 27.443  | 20.7216   | 12.0814    | 1         |
| cg12121660  | HOXB2                                 | 0.00208377        | 0.00208377           | 0.305187           | -3.27667                     | T down vs N                            | 13.445  | 13.1928   | 15.7       | 1         |
| cg12123879  | NCR1;NCR1;NCR1;NCR1;NCR1              | 4.67E-06          | 4.67E-06             | 0.16212            | -6.16826                     | T down vs N                            | 45.55   | 31.0046   | 10.8907    | 1         |
| cg12125332  | FAM164C;FAM164C                       | 0.00089536        | 0.000895358          | 3.42125            | 3.42125                      | T up vs N                              | 16.546  | 14.1702   | 13.703     | 1         |
| cg12126686  | CD22                                  | 9.55E-08          | 9.55E-08             | 0.209821           | -4.76597                     | T down vs N                            | 83.42   | 22.8374   | 4.38021    | 1         |
| cg12127282  | HOXD4;MIR10B                          | 0.00026537        | 0.000265373          | 9.69638            | 9.69638                      | T up vs N                              | 21.648  | 48.3374   | 35.7263    | 1         |
| cg12129480  | OR10X1                                | 0.00017343        | 0.000173429          | 0.174892           | -5.71781                     | T down vs N                            | 23.629  | 28.474    | 19.2811    | 1         |
| cg12130976  | FAAH2                                 | 5.52E-05          | 5.52E-05             | 0.17516            | -5.70906                     | T down vs N                            | 29.526  | 28.424    | 15.4027    | 1         |
| cg12131208  | C17orf64                              | 0.00027095        | 0.000270947          | 0.20049            | -4.98777                     | T down vs N                            | 21.554  | 24.1873   | 17.9549    | 1         |
| cg12131827  | GFRA2;GFRA2;GFRA2                     | 0.00052898        | 0.000528975          | 3.53947            | 3.53947                      | T up vs N                              | 18.656  | 14.9637   | 12.8332    | 1         |
| cg12133004  | C12orf54                              | 0.00408596        | 0.00408596           | 0.226376           | -4.41743                     | T down vs N                            | 11.208  | 20.67     | 29.5076    | 1         |
| cg12134682  | MAFK                                  | 0.0014884         | 0.0014884            | 0.32203            | -3.1053                      | T down vs N                            | 14.639  | 12.0256   | 13.1434    | 1         |
| cg12135344  | CHD5                                  | 8.26E-05          | 8.26E-05             | 6.70546            | 6.70546                      | T up vs N                              | 27.348  | 33.9159   | 19.8427    | 1         |
| cg12136274  | PDIA3P                                | 0.00127903        | 0.00127903           | 7.12534            | 7.12534                      | T up vs N                              | 15.195  | 36.1154   | 38.0294    | 1         |
| cg12136514  | TG;SLA;SLA                            | 1.47E-05          | 1.47E-05             | 0.262535           | -3.80902                     | T down vs N                            | 37.472  | 16.752    | 7.15289    | 1         |
| cg12136906  | FLG                                   | 6.79E-05          | 6.79E-05             | 0.114663           | -8.72122                     | T down vs N                            | 28.395  | 43.9321   | 24.7545    | 1         |
| cg12137286  | SHISA7                                | 0.00135926        | 0.00135926           | 0.201827           | -4.95473                     | T down vs N                            | 14.971  | 23.9877   | 25.6373    | 1         |
| cg12138330  | JAK3                                  | 0.00046453        | 0.000464532          | 0.224461           | -4.45511                     | T down vs N                            | 19.2    | 20.9071   | 17.4229    | 1         |
| cg12138483  | CLPP                                  | 0.00137363        | 0.00137363           | 0.261263           | -3.82755                     | T down vs N                            | 14.932  | 16.8738   | 18.0808    | 1         |
| cg12139617  | ALPK1;ALPK1                           | 0.00061865        | 0.000618652          | 0.320117           | -3.12386                     | T down vs N                            | 18.013  | 12.1524   | 10.7942    | 1         |
| cg12139725  | EPHA10                                | 0.00592915        | 0.00592915           | 4.29134            | 4.29134                      | T up vs N                              | 10.055  | 19.872    | 31.6223    | 1         |
| cg12141659  | KCNQ1;KCNQ1                           | 2.27E-05          | 2.27E-05             | 0.332979           | -3.0032                      | T down vs N                            | 34.724  | 11.3264   | 5.21898    | 1         |
| cg12141662  | PRDM16;PRDM16                         | 0.00010376        | 0.000103757          | 0.312291           | -3.20214                     | T down vs N                            | 26.168  | 12.6863   | 7.75678    | 1         |
| cg12142354  | CMKLR1;CMKLR1;CMKLR1                  | 0.00581087        | 0.00581087           | 0.191387           | -5.22501                     | T down vs N                            | 10.116  | 25.6063   | 40.5018    | 1         |
| cg12142865  | ALDH2                                 | 0.00052643        | 0.000526426          | 0.301704           | -3.31451                     | T down vs N                            | 18.676  | 13.4493   | 11.522     | 1         |
| cg12142869  | OR10AD1                               | 5.59E-05          | 5.59E-05             | 0.174715           | -5.72362                     | T down vs N                            | 29.455  | 28.5072   | 15.4854    | 1         |
| cg12144304  | SPINLW1                               | 0.00069768        | 0.00069768           | 0.189712           | -5.27116                     | T down vs N                            | 17.528  | 25.8794   | 23.6231    | 1         |
| cg12144803  | KALRN;KALRN;KALRN                     | 0.00092185        | 0.000921847          | 0.274098           | -3.64833                     | T down vs N                            | 16.433  | 15.6896   | 15.2764    | 1         |

| Probeset ID | UCSC_REFGENE_NAME                                                | p-value<br>(Type) | p-value (T vs.<br>N) | Ratio (T<br>vs. N) | Fold-<br>Change (T<br>vs. N) | Fold-Change (T vs.<br>N) (Description) | F(Type) | SS (Type) | SS (Error) | F (Error) |
|-------------|------------------------------------------------------------------|-------------------|----------------------|--------------------|------------------------------|----------------------------------------|---------|-----------|------------|-----------|
|             | CLEC4M;CLEC4M;CLEC4M;CLEC4M;CL<br>EC4M;CLEC4M;CLEC4M;CLEC4M;CLEC |                   |                      |                    |                              |                                        |         |           |            |           |
| cg12147572  | 4M;CLEC4M;CLEC4M;CLEC4M                                          | 0.00311609        | 0.00311609           | 0.324947           | -3.07742                     | T down vs N                            | 12.084  | 11.8349   | 15.6699    | 1         |
| cg12152338  | LDLRAD3                                                          | 0.0002341         | 0.000234099          | 0.177634           | -5.62956                     | T down vs N                            | 22.221  | 27.9682   | 20.1385    | 1         |
| cg12152540  | MXK                                                              | 4.51E-06          | 4.51E-06             | 0.215229           | -4.64621                     | T down vs N                            | 45.821  | 22.099    | 7.71671    | 1         |
| cg12157377  | ZDHHHC11                                                         | 0.00011648        | 0.000116484          | 0.290711           | -3.43984                     | T down vs N                            | 25.582  | 14.2953   | 8.94102    | 1         |
| cg12157646  | GPR39                                                            | 5.84E-05          | 5.84E-05             | 0.200192           | -4.99519                     | T down vs N                            | 29.211  | 24.2321   | 13.2727    | 1         |
| cg12157673  | ZNF578                                                           | 8.13E-05          | 8.13E-05             | 3.33965            | 3.33965                      | T up vs N                              | 27.436  | 13.6195   | 7.94267    | 1         |
| cg12160637  | HEYL                                                             | 1.70E-05          | 1.70E-05             | 3.89999            | 3.89999                      | T up vs N                              | 36.561  | 17.3485   | 7.5921     | 1         |
| cg12161905  | LILRB4;LILRB4;LILRB4;LILRB4                                      | 0.00047824        | 0.000478239          | 0.233336           | -4.28566                     | T down vs N                            | 19.077  | 19.8359   | 16.6363    | 1         |
| cg12161971  | USP35                                                            | 2.44E-06          | 2.44E-06             | 10.7731            | 10.7731                      | T up vs N                              | 50.651  | 52.9225   | 16.7175    | 1         |
| cg12164321  | CPXM2                                                            | 4.16E-06          | 4.16E-06             | 11.6057            | 11.6057                      | T up vs N                              | 46.427  | 56.289    | 19.3987    | 1         |
| cg12166476  | LMO7;LMO7;LMO7                                                   | 3.63E-07          | 3.63E-07             | 0.176938           | -5.65171                     | T down vs N                            | 68.295  | 28.0955   | 6.58215    | 1         |
| cg12166610  | NRG1                                                             | 0.00011911        | 0.000119106          | 13.3242            | 13.3242                      | T up vs N                              | 25.47   | 62.8087   | 39.4562    | 1         |
| cg12166802  | UTS2R                                                            | 0.00169935        | 0.00169935           | 0.229556           | -4.35624                     | T down vs N                            | 14.163  | 20.2837   | 22.9154    | 1         |
| cg12171980  | KANK3                                                            | 9.09E-05          | 9.09E-05             | 0.299575           | -3.33807                     | T down vs N                            | 26.847  | 13.6087   | 8.11029    | 1         |
| cg12172531  | NOTCH4                                                           | 1.29E-05          | 1.29E-05             | 0.215884           | -4.63212                     | T down vs N                            | 38.324  | 22.0118   | 9.18965    | 1         |
| cg12173498  | ETV7                                                             | 9.05E-06          | 9.05E-06             | 12.928             | 12.928                       | T up vs N                              | 40.759  | 61.3529   | 24.0843    | 1         |
| cg12174077  | ADNP2                                                            | 0.00032107        | 0.00032107           | 0.278548           | -3.59005                     | T down vs N                            | 20.795  | 15.3016   | 11.7733    | 1         |
| cg12177743  | TTC12                                                            | 2.46E-05          | 2.46E-05             | 43.5096            | 43.5096                      | T up vs N                              | 34.226  | 133.331   | 62.329     | 1         |
| cg12177909  | PDE3B                                                            | 0.00106458        | 0.00106458           | 0.32773            | -3.05129                     | T down vs N                            | 15.882  | 11.656    | 11.7426    | 1         |
| cg12178147  | ACACB                                                            | 4.02E-05          | 4.02E-05             | 0.254705           | -3.92611                     | T down vs N                            | 31.317  | 17.5191   | 8.95063    | 1         |
| cg12178287  | PGLS                                                             | 0.0046799         | 0.0046799            | 0.224457           | -4.45519                     | T down vs N                            | 10.781  | 20.9075   | 31.0292    | 1         |
| cg12178578  | HPDL;HPDL                                                        | 0.00018231        | 0.000182313          | 24.1164            | 24.1164                      | T up vs N                              | 23.39   | 94.8868   | 64.9066    | 1         |
| cg12181372  | SYCP2                                                            | 0.00010422        | 0.00010422           | 3.01363            | 3.01363                      | T up vs N                              | 26.145  | 11.3979   | 6.97511    | 1         |
| cg12181579  | RBM19;RBM19;RBM19                                                | 6.11E-05          | 6.11E-05             | 0.300698           | -3.3256                      | T down vs N                            | 28.964  | 13.5244   | 7.47093    | 1         |
| cg12184157  | CST9L                                                            | 0.00040852        | 0.000408521          | 0.204208           | -4.89696                     | T down vs N                            | 19.746  | 23.6374   | 19.1531    | 1         |
| cg12184221  | TMEM39A                                                          | 4.57E-05          | 4.57E-05             | 0.167456           | -5.97171                     | T down vs N                            | 30.576  | 29.9107   | 15.652     | 1         |
| cg12186410  | NPM2                                                             | 0.00479816        | 0.00479816           | 20.6969            | 20.6969                      | T up vs N                              | 11.198  | 75.2404   | 94.0637    | 1         |
| cg12186839  | HCN2                                                             | 0.00048417        | 0.000484169          | 0.174242           | -5.73914                     | T down vs N                            | 19.026  | 28.5958   | 24.0484    | 1         |
| cg12187624  | TRMT1;TRMT1;TRMT1                                                | 1.36E-05          | 1.36E-05             | 0.235185           | -4.25197                     | T down vs N                            | 37.989  | 19.6213   | 8.26395    | 1         |
| cg12188860  | TOP1MT                                                           | 0.00067461        | 0.000674607          | 0.299851           | -3.33499                     | T down vs N                            | 17.663  | 13.588    | 12.3086    | 1         |
| cg12190044  | NR4A3;NR4A3;NR4A3;NR4A3                                          | 0.00018299        | 0.000182992          | 4.98445            | 4.98445                      | T up vs N                              | 23.373  | 24.1672   | 16.5439    | 1         |
| cg12190994  | SDK1;SDK1                                                        | 9.27E-05          | 9.27E-05             | 3.21839            | 3.21839                      | T up vs N                              | 26.746  | 12.7968   | 7.65528    | 1         |
| cg12191107  | RARS2                                                            | 0.00013551        | 0.000135507          | 0.284137           | -3.51943                     | T down vs N                            | 24.828  | 14.8296   | 9.55682    | 1         |
| cg12195211  | CYP2W1                                                           | 0.00061411        | 0.000614105          | 0.308508           | -3.24141                     | T down vs N                            | 18.043  | 12.9534   | 11.4866    | 1         |
| cg12196045  | MAP1LC3B2;MAP1LC3B2                                              | 1.00E-05          | 1.00E-05             | 0.165362           | -6.04732                     | T down vs N                            | 40.042  | 30.3334   | 12.1206    | 1         |
| cg12196692  | HEATR7B2;HEATR7B2                                                | 1.92E-05          | 1.92E-05             | 0.152454           | -6.55936                     | T down vs N                            | 35.787  | 33.1352   | 14.8146    | 1         |
| cg12196847  | TSHR;TSHR;TSHR                                                   | 2.38E-06          | 2.38E-06             | 0.250226           | -3.99639                     | T down vs N                            | 50.881  | 19.7766   | 5.65287    | 1         |
| cg12198334  | SHANK2                                                           | 0.00038248        | 0.000382479          | 0.164203           | -6.09003                     | T down vs N                            | 20.03   | 30.5711   | 24.4206    | 1         |
| cg12199221  | HAPLN1                                                           | 0.00386517        | 0.00386517           | 3.25634            | 3.25634                      | T up vs N                              | 11.385  | 13.0548   | 18.3467    | 1         |
| cg12200270  | PNLIPRP3                                                         | 1.28E-05          | 1.28E-05             | 0.311909           | -3.20607                     | T down vs N                            | 38.425  | 12.713    | 5.29363    | 1         |
| cg12200412  | CD1E;CD1E;CD1E;CD1E;CD1E                                         | 0.00104441        | 0.00104441           | 0.331603           | -3.01566                     | T down vs N                            | 15.955  | 11.4119   | 11.4443    | 1         |
| cg12202185  | AHRR                                                             | 0.00022495        | 0.000224946          | 0.228946           | -4.36784                     | T down vs N                            | 22.405  | 20.357    | 14.5376    | 1         |
| cg12205230  | TPM3                                                             | 1.21E-06          | 1.21E-06             | 0.170709           | -5.85793                     | T down vs N                            | 56.655  | 29.2702   | 8.26631    | 1         |
| cg12206199  | LOC375196;LOC100271715                                           | 0.00031529        | 0.000315291          | 24.2261            | 24.2261                      | T up vs N                              | 20.876  | 95.1576   | 72.9336    | 1         |
| cg12206571  | TINAGL1                                                          | 6.50E-06          | 6.50E-06             | 5.24501            | 5.24501                      | T up vs N                              | 43.11   | 25.7248   | 9.54752    | 1         |
| cg12213062  | SPEG                                                             | 0.00054696        | 0.000546956          | 8.24035            | 8.24035                      | T up vs N                              | 18.518  | 41.6613   | 35.9966    | 1         |
| cg12214451  | ARSL;ARSL                                                        | 2.87E-06          | 2.87E-06             | 6.05939            | 6.05939                      | T up vs N                              | 49.357  | 30.4006   | 9.85502    | 1         |
| cg12215478  | SRPK1                                                            | 0.00659292        | 0.00659292           | 0.303097           | -3.29927                     | T down vs N                            | 9.7365  | 13.3461   | 21.9317    | 1         |
| cg12215739  | HOXD4;MIR10B                                                     | 0.00018606        | 0.000186063          | 11.887             | 11.887                       | T up vs N                              | 23.294  | 57.3942   | 39.4229    | 1         |
| cg12216435  | COPG                                                             | 0.00116299        | 0.00116299           | 0.314945           | -3.17516                     | T down vs N                            | 15.549  | 12.5024   | 12.8652    | 1         |
| cg12217625  | VSIG8;C1orf204                                                   | 8.04E-05          | 8.04E-05             | 3.4841             | 3.4841                       | T up vs N                              | 27.492  | 14.5927   | 8.49289    | 1         |
| cg12221087  | RNF213;RNF213                                                    | 7.36E-06          | 7.36E-06             | 0.115525           | -8.65613                     | T down vs N                            | 42.214  | 43.6287   | 16.5364    | 1         |
| cg12223336  | TEAD1                                                            | 7.99E-06          | 7.99E-06             | 0.204574           | -4.88821                     | T down vs N                            | 41.635  | 23.5841   | 9.0632     | 1         |
| cg12226639  | GHDC;GHDC;GHDC;GHDC                                              | 1.13E-06          | 1.13E-06             | 0.184569           | -5.41803                     | T down vs N                            | 57.269  | 26.7422   | 7.47139    | 1         |
| cg12227210  | RYR1;RYR1                                                        | 0.00010718        | 0.000107183          | 0.237986           | -4.20192                     | T down vs N                            | 26.003  | 19.3016   | 11.8768    | 1         |
| cg12230709  | PRTN3                                                            | 2.28E-05          | 2.28E-05             | 0.227231           | -4.40081                     | T down vs N                            | 34.694  | 20.5653   | 9.48413    | 1         |
| cg12233232  | TTC17                                                            | 2.55E-06          | 2.55E-06             | 0.179392           | -5.57438                     | T down vs N                            | 50.307  | 27.6503   | 8.79403    | 1         |
| cg12234287  | LTB;LTB                                                          | 0.00686522        | 0.00686522           | 3.02238            | 3.02238                      | T up vs N                              | 9.8044  | 10.784    | 16.4986    | 1         |
| cg12235877  | SLC6A12;SLC6A12;SLC6A12                                          | 4.21E-06          | 4.21E-06             | 0.214329           | -4.66573                     | T down vs N                            | 46.34   | 22.2198   | 7.67186    | 1         |
| cg12238593  | BTN3A3;BTN3A3                                                    | 0.00057657        | 0.000576568          | 0.268996           | -3.71753                     | T down vs N                            | 18.301  | 16.1484   | 14.1182    | 1         |
| cg12242224  | AMMECR1;RGAG1                                                    | 9.32E-06          | 9.32E-06             | 0.321467           | -3.11074                     | T down vs N                            | 40.553  | 12.0628   | 4.75934    | 1         |
| cg12242373  | MIR609;C10orf79                                                  | 0.00163192        | 0.00163192           | 0.308585           | -3.24059                     | T down vs N                            | 14.307  | 12.9478   | 14.4797    | 1         |
| cg12244647  | PLXNB2                                                           | 0.00017479        | 0.000174788          | 3.29255            | 3.29255                      | T up vs N                              | 23.591  | 13.3005   | 9.02061    | 1         |
| cg12245370  | NCLN                                                             | 1.52E-07          | 1.52E-07             | 0.202987           | -4.92643                     | T down vs N                            | 77.852  | 23.8162   | 4.89468    | 1         |
| cg12245717  | C20orf56                                                         | 1.71E-07          | 1.71E-07             | 0.211187           | -4.73514                     | T down vs N                            | 76.532  | 22.6479   | 4.73482    | 1         |
| cg12248614  | SPTBN4                                                           | 0.00018365        | 0.000183648          | 3.97784            | 3.97784                      | T up vs N                              | 23.356  | 17.856    | 12.2324    | 1         |
| cg12250049  | BNC1                                                             | 4.70E-05          | 4.70E-05             | 0.223531           | -4.47364                     | T down vs N                            | 30.425  | 21.0234   | 11.0559    | 1         |
| cg12250761  | ORS2K2                                                           | 7.33E-07          | 7.33E-07             | 0.138163           | -7.23782                     | T down vs N                            | 61.298  | 36.6939   | 9.57782    | 1         |

| Probeset ID                    | UCSC_REFGENE_NAME             | p-value<br>(Type) | p-value (T vs.<br>N) | Ratio (T<br>vs. N) | Fold-<br>Change (T<br>vs. N) | Fold-Change (T vs.<br>N) (Description) | F(Type) | SS (Type) | SS (Error) | F (Error) |
|--------------------------------|-------------------------------|-------------------|----------------------|--------------------|------------------------------|----------------------------------------|---------|-----------|------------|-----------|
| CCL15;CCL14-CCL15;CCL15;CCL14- |                               |                   |                      |                    |                              |                                        |         |           |            |           |
| cg12251111                     | CCL15                         | 0.00073414        | 0.000734143          | 0.303853           | -3.29107                     | T down vs N                            | 17.325  | 13.2905   | 12.2741    | 1         |
| cg12252135                     | FSCN2;FSCN2                   | 3.19E-05          | 3.19E-05             | 6.36935            | 6.36935                      | T up vs N                              | 32.662  | 32.1076   | 15.7287    | 1         |
| cg12252412                     | DPYSL2                        | 9.77E-05          | 9.77E-05             | 3.33692            | 3.33692                      | T up vs N                              | 26.478  | 13.601    | 8.2188     | 1         |
| cg12253859                     | CYP2C9                        | 3.38E-05          | 3.38E-05             | 0.238368           | -4.1952                      | T down vs N                            | 32.324  | 19.2585   | 9.53272    | 1         |
| cg12256705                     | PRKCE                         | 4.31E-05          | 4.31E-05             | 0.25856            | -3.86758                     | T down vs N                            | 30.911  | 17.1364   | 8.87011    | 1         |
| cg12257156                     | VIPR2                         | 0.00017239        | 0.000172385          | 6.31966            | 6.31966                      | T up vs N                              | 23.658  | 31.8365   | 21.5317    | 1         |
| cg12260798                     | HIST1H4F                      | 0.00077275        | 0.000772746          | 7.46083            | 7.46083                      | T up vs N                              | 17.122  | 37.8277   | 35.3492    | 1         |
| cg12261095                     | FCER2                         | 7.49E-07          | 7.49E-07             | 0.323197           | -3.09409                     | T down vs N                            | 61.094  | 11.9489   | 3.12935    | 1         |
| cg12262378                     | ALOX12                        | 3.50E-05          | 3.50E-05             | 5.47594            | 5.47594                      | T up vs N                              | 32.117  | 27.0798   | 13.4905    | 1         |
| cg12265810                     | FOSB;FOSB                     | 8.01E-05          | 8.01E-05             | 0.31065            | -3.21906                     | T down vs N                            | 27.514  | 12.8014   | 7.44419    | 1         |
| cg12270480                     | C18orf55                      | 0.00060893        | 0.00060893           | 0.280082           | -3.57038                     | T down vs N                            | 18.078  | 15.1703   | 13.4268    | 1         |
| cg12272488                     | C3P1                          | 6.60E-05          | 6.60E-05             | 0.219535           | -4.55508                     | T down vs N                            | 28.547  | 21.5327   | 12.0687    | 1         |
| cg12276513                     | CHD5                          | 4.90E-07          | 4.90E-07             | 28.0009            | 28.0009                      | T up vs N                              | 65.225  | 104       | 25.5117    | 1         |
| cg12280326                     | MIR516B2                      | 0.00062956        | 0.000629564          | 0.201394           | -4.96538                     | T down vs N                            | 17.942  | 24.0521   | 21.4486    | 1         |
| cg12280471                     | NLRP3;NLRP3;NLRP3;NLRP3;NLRP3 | 3.53E-05          | 3.53E-05             | 0.203161           | -4.92221                     | T down vs N                            | 32.07   | 23.7907   | 11.8694    | 1         |
| cg12280901                     | GPX5;GPX5                     | 0.00245409        | 0.00245409           | 0.288757           | -3.46312                     | T down vs N                            | 12.883  | 14.4519   | 17.9484    | 1         |
| cg12281049                     | TLR3;TLR3                     | 0.00061425        | 0.000614247          | 0.30122            | -3.31984                     | T down vs N                            | 18.042  | 13.4854   | 11.959     | 1         |
| cg12281328                     | ARSI                          | 5.19E-06          | 5.19E-06             | 3.04534            | 3.04534                      | T up vs N                              | 44.755  | 11.6153   | 4.15249    | 1         |
| cg12282588                     | FCRL2                         | 0.00530264        | 0.00530264           | 0.269646           | -3.70857                     | T down vs N                            | 10.395  | 16.0891   | 24.7655    | 1         |
| cg12283482                     | AASDH                         | 2.12E-05          | 2.12E-05             | 0.323236           | -3.09371                     | T down vs N                            | 35.159  | 11.9464   | 5.43653    | 1         |
| cg12284382                     | RASD2                         | 0.00038111        | 0.000381114          | 0.231715           | -4.31564                     | T down vs N                            | 20.045  | 20.0264   | 15.985     | 1         |
| cg12285118                     | FAM107B                       | 2.26E-05          | 2.26E-05             | 0.300743           | -3.3251                      | T down vs N                            | 34.763  | 13.521    | 6.22317    | 1         |
| cg12285184                     | RPS6KA2                       | 8.99E-05          | 8.99E-05             | 0.24334            | -4.10947                     | T down vs N                            | 26.904  | 18.708    | 11.1258    | 1         |
| cg12286154                     | TNXB;TNXB                     | 6.00E-06          | 6.00E-06             | 0.332788           | -3.00492                     | T down vs N                            | 43.691  | 11.3382   | 4.15219    | 1         |
| cg12287936                     | NDUF56;MRPL36                 | 0.00105452        | 0.00105452           | 9.0462             | 9.0462                       | T up vs N                              | 15.918  | 45.4289   | 45.6627    | 1         |
| cg12289476                     | PPEF2                         | 3.13E-05          | 3.13E-05             | 0.283924           | -3.52208                     | T down vs N                            | 32.786  | 14.8473   | 7.24572    | 1         |
| cg12289617                     | CCT5                          | 5.15E-06          | 5.15E-06             | 0.198523           | -5.0372                      | T down vs N                            | 44.82   | 24.4851   | 8.74079    | 1         |
| cg12290311                     | DAB2                          | 0.00060321        | 0.000603205          | 0.227978           | -4.3864                      | T down vs N                            | 18.116  | 20.4743   | 18.0827    | 1         |
| cg12290450                     | IL1F7;IL1F7;IL1F7;IL1F7       | 0.00031164        | 0.000311642          | 0.261831           | -3.81925                     | T down vs N                            | 20.927  | 16.8193   | 12.8593    | 1         |
| cg12296550                     | HLA-DQB2                      | 2.69E-05          | 2.69E-05             | 0.31924            | -3.13244                     | T down vs N                            | 33.678  | 12.211    | 5.80122    | 1         |
| cg12296751                     | CAV1                          | 0.00054188        | 0.000541881          | 7.6031             | 7.6031                       | T up vs N                              | 18.556  | 38.5421   | 33.2324    | 1         |
| cg12297590                     | ZDHHC14;ZDHHC14               | 0.0023544         | 0.0023544            | 0.263572           | -3.79404                     | T down vs N                            | 13.024  | 16.6534   | 20.4582    | 1         |
| cg12301972                     | AGXT                          | 0.00077746        | 0.000777455          | 0.280568           | -3.5642                      | T down vs N                            | 17.098  | 15.129    | 14.1576    | 1         |
| cg12303813                     | NUAK2                         | 0.00029396        | 0.00029396           | 0.281048           | -3.55811                     | T down vs N                            | 21.187  | 15.0884   | 11.3942    | 1         |
| PCDHGA4;PCDHGA11;PCDHGA11;PCD  |                               |                   |                      |                    |                              |                                        |         |           |            |           |
| HGA9;PCDHGA1;PCDHGB1;PCDHGB6;  |                               |                   |                      |                    |                              |                                        |         |           |            |           |
| cg12304520                     | PCDHGA12;PCDHGB3;PCDHGB7;PCDH | 0.00106613        | 0.00106613           | 4.21555            | 4.21555                      | T up vs N                              | 15.877  | 19.3888   | 19.5396    | 1         |
| cg12304663                     | KIR3DL2                       | 2.26E-05          | 2.26E-05             | 0.242133           | -4.12996                     | T down vs N                            | 34.74   | 18.8399   | 8.67697    | 1         |
| cg12305431                     | HOXA3;HOXA3                   | 0.00694282        | 0.00694282           | 6.33911            | 6.33911                      | T up vs N                              | 9.5831  | 31.9428   | 53.3321    | 1         |
| cg12305798                     | C2orf84                       | 5.74E-05          | 5.74E-05             | 0.180973           | -5.52568                     | T down vs N                            | 29.305  | 27.3686   | 14.9428    | 1         |
| cg12306057                     | FPR2;FPR2                     | 3.73E-06          | 3.73E-06             | 0.10031            | -9.96907                     | T down vs N                            | 47.265  | 49.5249   | 16.7649    | 1         |
| cg12306367                     | GATA6                         | 0.00015713        | 0.000157128          | 0.240752           | -4.15365                     | T down vs N                            | 24.104  | 18.9921   | 12.6069    | 1         |
| cg12307787                     | KCNB1                         | 0.00068321        | 0.000683212          | 35.5129            | 35.5129                      | T up vs N                              | 18.157  | 112.342   | 92.8074    | 1         |
| cg12309813                     | CCDC109B                      | 2.83E-05          | 2.83E-05             | 0.240386           | -4.15998                     | T down vs N                            | 33.373  | 19.0328   | 9.1249     | 1         |
| cg12311002                     | CCL18                         | 0.00050538        | 0.00050538           | 0.311627           | -3.20897                     | T down vs N                            | 18.846  | 12.7327   | 10.8099    | 1         |
| cg12315997                     | LIAS;RPL9;RPL9;LIAS           | 0.00012487        | 0.000124868          | 0.243398           | -4.1085                      | T down vs N                            | 25.233  | 18.7017   | 11.8584    | 1         |
| PCDHA2;PCDHA1;PCDHA1;PCDHA3;PC |                               |                   |                      |                    |                              |                                        |         |           |            |           |
| cg12317217                     | DHA4;PCDHA5;PCDHA5            | 2.42E-05          | 2.42E-05             | 3.0605             | 3.0605                       | T up vs N                              | 34.326  | 11.7191   | 5.46242    | 1         |
| cg12320239                     | OR4A15                        | 0.00016018        | 0.000160178          | 0.256655           | -3.89628                     | T down vs N                            | 24.011  | 17.3242   | 11.5443    | 1         |
| cg12322235                     | SNORD32B                      | 0.00089644        | 0.000896444          | 0.302169           | -3.30941                     | T down vs N                            | 16.541  | 13.4148   | 12.9761    | 1         |
| BRUNOL4;BRUNOL4;BRUNOL4;BRUN   |                               |                   |                      |                    |                              |                                        |         |           |            |           |
| cg12323274                     | OL4                           | 0.00053994        | 0.000539944          | 6.13367            | 6.13367                      | T up vs N                              | 18.571  | 30.8132   | 26.5471    | 1         |
| cg12324144                     | LRRC34                        | 0.00026871        | 0.000268713          | 0.262265           | -3.81294                     | T down vs N                            | 21.591  | 16.7777   | 12.433     | 1         |
| cg12324353                     | TERT;TERT                     | 0.00073279        | 0.000732788          | 0.308581           | -3.24064                     | T down vs N                            | 17.332  | 12.9481   | 11.9528    | 1         |
| cg12324970                     | PITX3                         | 3.88E-07          | 3.88E-07             | 7.27493            | 7.27493                      | T up vs N                              | 67.607  | 36.8838   | 8.72904    | 1         |
| cg12325049                     | PRRT3                         | 0.00056871        | 0.000568706          | 0.245059           | -4.08065                     | T down vs N                            | 18.357  | 18.5221   | 16.1437    | 1         |
| cg12326299                     | PPIC                          | 3.42E-05          | 3.42E-05             | 0.25865            | -3.86623                     | T down vs N                            | 32.257  | 17.1275   | 8.49544    | 1         |
| cg12327691                     | COX15;CUTC;COX15              | 2.30E-05          | 2.30E-05             | 0.24697            | -4.04907                     | T down vs N                            | 34.635  | 18.318    | 8.46225    | 1         |
| cg12328890                     | EPS8L2                        | 0.0001027         | 0.000102702          | 13.3024            | 13.3024                      | T up vs N                              | 26.22   | 62.7296   | 38.2785    | 1         |
| cg12329048                     | MED19                         | 4.07E-05          | 4.07E-05             | 0.283613           | -3.52593                     | T down vs N                            | 31.237  | 14.8731   | 7.61827    | 1         |
| cg12329318                     | COL5A2                        | 0.00185763        | 0.00185763           | 0.211086           | -4.7374                      | T down vs N                            | 13.847  | 22.6618   | 26.1858    | 1         |
| cg12333043                     | NHSL1                         | 0.00025044        | 0.000250438          | 0.271337           | -3.68545                     | T down vs N                            | 21.911  | 15.936    | 11.6367    | 1         |
| cg12334811                     | ZNF165                        | 0.00547171        | 0.00547171           | 0.279233           | -3.58124                     | T down vs N                            | 10.299  | 15.2428   | 23.6815    | 1         |
| cg12334842                     | WWC2                          | 0.00058349        | 0.000583491          | 0.316354           | -3.16102                     | T down vs N                            | 18.252  | 12.406    | 10.8754    | 1         |
| cg12335056                     | CBY3                          | 0.00034189        | 0.000341888          | 0.325718           | -3.07014                     | T down vs N                            | 20.518  | 11.7851   | 9.18993    | 1         |
| cg12336960                     | CCDC50;CCDC50;UTS2D           | 3.30E-05          | 3.30E-05             | 0.269817           | -3.70621                     | T down vs N                            | 32.459  | 16.0735   | 7.9232     | 1         |
| cg12338137                     | TNS1                          | 0.00061546        | 0.000615457          | 0.277959           | -3.59766                     | T down vs N                            | 18.034  | 15.3523   | 13.6206    | 1         |
| cg12349837                     | COL4A3;COL4A3;COL4A3;COL4A3   | 0.00050103        | 0.000501029          | 0.306831           | -3.25913                     | T down vs N                            | 18.882  | 13.0737   | 11.0782    | 1         |
| cg12355172                     | ACY3                          | 0.00447207        | 0.00447207           | 0.137422           | -7.27687                     | T down vs N                            | 11.159  | 34.7235   | 46.6771    | 1         |
| cg12357484                     | ANO1;ANO1                     | 1.85E-05          | 1.85E-05             | 4.43144            | 4.43144                      | T up vs N                              | 36      | 20.7582   | 9.22598    | 1         |

| Probeset ID | UCSC_REFGENE_NAME                            | p-value<br>(Type) | p-value (T vs.<br>N) | Ratio (T<br>vs. N) | Fold-<br>Change (T<br>vs. N) | Fold-Change (T vs.<br>N) (Description) | F(Type) | SS (Type) | SS (Error) | F (Error) |
|-------------|----------------------------------------------|-------------------|----------------------|--------------------|------------------------------|----------------------------------------|---------|-----------|------------|-----------|
| cg12359511  | PTPRM;PTPRM<br>MBNL1;MBNL1;LOC401093;MBNL1;L | 0.00020102        | 0.000201016          | 0.24421            | -4.09484                     | T down vs N                            | 22.929  | 18.6137   | 12.9887    | 1         |
| cg12360736  | OC401093;MBNL1                               | 0.00044963        | 0.000449633          | 0.2822             | -3.54359                     | T down vs N                            | 19.337  | 14.9913   | 12.4039    | 1         |
| cg12364324  | FGF18                                        | 0.00215672        | 0.00215672           | 0.319867           | -3.1263                      | T down vs N                            | 13.326  | 12.1691   | 14.6112    | 1         |
| cg12365667  | HLA-DPB1                                     | 0.00049728        | 0.000497279          | 0.226069           | -4.42343                     | T down vs N                            | 18.914  | 20.7078   | 17.5179    | 1         |
| cg12367971  | KRTAP10-8;C21orf29                           | 0.00076623        | 0.000766232          | 0.267649           | -3.73624                     | T down vs N                            | 17.155  | 16.2721   | 15.1763    | 1         |
| cg12368583  | C10orf11                                     | 1.36E-05          | 1.36E-05             | 0.279897           | -3.57275                     | T down vs N                            | 37.986  | 15.1861   | 6.39659    | 1         |
| cg12374506  | C1QL4                                        | 0.00017983        | 0.000179831          | 3.56628            | 3.56628                      | T up vs N                              | 23.456  | 15.1429   | 10.3296    | 1         |
| cg12375380  | EFHB                                         | 1.84E-05          | 1.84E-05             | 0.272405           | -3.67101                     | T down vs N                            | 36.039  | 15.8402   | 7.03255    | 1         |
| cg12377368  | SAAL1                                        | 0.00143276        | 0.00143276           | 0.29296            | -3.41343                     | T down vs N                            | 14.778  | 14.1176   | 15.2851    | 1         |
| cg12377641  | C10orf47                                     | 1.77E-06          | 1.77E-06             | 0.281844           | -3.54806                     | T down vs N                            | 53.365  | 15.0212   | 4.50371    | 1         |
| cg12378950  | BUB1B;PAK6;PAK6                              | 2.88E-05          | 2.88E-05             | 0.243024           | -4.11483                     | T down vs N                            | 33.267  | 18.7425   | 9.01422    | 1         |
| cg12379145  | PRDM2;PRDM2;PRDM2                            | 2.63E-07          | 2.63E-07             | 0.176509           | -5.66543                     | T down vs N                            | 71.72   | 28.1742   | 6.28536    | 1         |
| cg12379954  | GAB1;GAB1                                    | 0.00067098        | 0.00067098           | 4.22059            | 4.22059                      | T up vs N                              | 17.685  | 19.421    | 17.5708    | 1         |
| cg12380854  | LRRC46;MRPL10                                | 0.00081158        | 0.000811576          | 0.330838           | -3.02263                     | T down vs N                            | 16.929  | 11.4597   | 10.831     | 1         |
| cg12382418  | METTL6                                       | 0.00078827        | 0.000788269          | 0.304188           | -3.28745                     | T down vs N                            | 17.043  | 13.2659   | 12.4538    | 1         |
| cg12385032  | BCAS3;BCAS3                                  | 0.00049343        | 0.000493434          | 0.2943             | -3.39789                     | T down vs N                            | 18.946  | 14.0128   | 11.8338    | 1         |
| cg12386646  | ITPKA                                        | 1.47E-05          | 1.47E-05             | 6.84585            | 6.84585                      | T up vs N                              | 37.491  | 34.6586   | 14.7912    | 1         |
| cg12387247  | FCER2;FCER2                                  | 0.00038041        | 0.000380406          | 0.274703           | -3.6403                      | T down vs N                            | 20.053  | 15.6362   | 12.4758    | 1         |
| cg12389490  | KCNJ16;KCNJ16;KCNJ16                         | 0.00228209        | 0.00228209           | 0.327688           | -3.05168                     | T down vs N                            | 13.131  | 11.6587   | 14.2059    | 1         |
| cg12390344  | LAMA3;LAMA3                                  | 0.00091275        | 0.000912754          | 7.14903            | 7.14903                      | T up vs N                              | 16.471  | 36.2377   | 35.2013    | 1         |
| cg12391352  | ANKS1B;ANKS1B;ANKS1B                         | 0.00367084        | 0.00367084           | 8.88066            | 8.88066                      | T up vs N                              | 11.551  | 44.6701   | 61.8774    | 1         |
| cg12392473  | KCNB1                                        | 0.0001298         | 0.000129802          | 28.0402            | 28.0402                      | T up vs N                              | 25.041  | 104.088   | 66.5081    | 1         |
| cg12392519  | PHOSPHO1;PHOSPHO1                            | 3.78E-05          | 3.78E-05             | 0.317318           | -3.15141                     | T down vs N                            | 31.67   | 12.3405   | 6.23461    | 1         |
| cg12394777  | MYO3B;MYO3B;MYO3B                            | 1.50E-05          | 1.50E-05             | 0.303396           | -3.29602                     | T down vs N                            | 37.362  | 13.324    | 5.70598    | 1         |
| cg12395420  | MIR518F                                      | 0.00010159        | 0.000101593          | 0.316468           | -3.15987                     | T down vs N                            | 26.276  | 12.3982   | 7.54957    | 1         |
| cg12397274  | TINAG                                        | 1.33E-05          | 1.33E-05             | 0.157127           | -6.36427                     | T down vs N                            | 38.152  | 32.0799   | 13.4535    | 1         |
| cg12400781  | APC2                                         | 0.00028332        | 0.000283316          | 4.10931            | 4.10931                      | T up vs N                              | 21.353  | 18.707    | 14.0175    | 1         |
| cg12403889  | C1orf187                                     | 3.71E-05          | 3.71E-05             | 0.271172           | -3.6877                      | T down vs N                            | 31.771  | 15.9508   | 8.03293    | 1         |
| cg12404745  | GBP6                                         | 0.00010042        | 0.000100421          | 0.222592           | -4.49253                     | T down vs N                            | 26.335  | 21.1418   | 12.8447    | 1         |
| cg12406124  | CCNL1                                        | 6.05E-06          | 6.05E-06             | 0.209204           | -4.78002                     | T down vs N                            | 43.63   | 22.9235   | 8.40651    | 1         |
| cg12407526  | ELOVL7;ELOVL7                                | 0.00027072        | 0.000270722          | 0.211268           | -4.73332                     | T down vs N                            | 21.558  | 22.6367   | 16.8009    | 1         |
| cg12408990  | RASGEF1C                                     | 0.00043445        | 0.000434449          | 5.26928            | 5.26928                      | T up vs N                              | 19.483  | 25.8683   | 21.2435    | 1         |
| cg12410939  | CAPN9;CAPN9                                  | 1.34E-08          | 1.34E-08             | 0.196678           | -5.08446                     | T down vs N                            | 110.79  | 24.7687   | 3.57716    | 1         |
| cg12413421  | RSPO1                                        | 1.01E-05          | 1.01E-05             | 0.247684           | -4.03741                     | T down vs N                            | 39.983  | 18.2425   | 7.30017    | 1         |
| cg12413579  | PSMB2                                        | 1.68E-05          | 1.68E-05             | 0.302096           | -3.31021                     | T down vs N                            | 36.617  | 13.4201   | 5.86406    | 1         |
| cg12413606  | MGC27382                                     | 0.00118581        | 0.00118581           | 0.327873           | -3.04996                     | T down vs N                            | 15.476  | 11.6469   | 12.0411    | 1         |
| cg12414557  | RNF212;RNF212;RNF212;RNF212                  | 1.07E-05          | 1.07E-05             | 7.80088            | 7.80088                      | T up vs N                              | 44.408  | 34.5836   | 10.9028    | 1         |
| cg12415569  | SLC6A12;SLC6A12;SLC6A12;SLC6A12              | 0.00278492        | 0.00278492           | 0.308087           | -3.24583                     | T down vs N                            | 12.457  | 12.9834   | 16.6763    | 1         |
| cg12415917  | OR56A1;OR56A1                                | 7.32E-06          | 7.32E-06             | 0.160406           | -6.2342                      | T down vs N                            | 44.662  | 29.5229   | 9.91548    | 1         |
| cg12416561  | C4orf22                                      | 3.07E-07          | 3.07E-07             | 0.219756           | -4.5505                      | T down vs N                            | 70.04   | 21.5042   | 4.91243    | 1         |
| cg12417466  | ARPP-21                                      | 0.00588519        | 0.00588519           | 0.268743           | -3.72103                     | T down vs N                            | 10.077  | 16.1716   | 25.6764    | 1         |
| cg12419685  | GGT7                                         | 0.00195127        | 0.00195127           | 3.10816            | 3.10816                      | T up vs N                              | 13.674  | 12.0451   | 14.094     | 1         |
| cg12423493  | FKBP2;FKBP2                                  | 8.21E-06          | 8.21E-06             | 0.193376           | -5.17128                     | T down vs N                            | 41.441  | 25.2872   | 9.76308    | 1         |
| cg12423733  | MA51L                                        | 3.47E-05          | 3.47E-05             | 0.129376           | -7.72943                     | T down vs N                            | 32.172  | 39.1709   | 19.4805    | 1         |
| cg12426196  | TSTD1;TSTD1;TSTD1                            | 4.74E-05          | 4.74E-05             | 7.90932            | 7.90932                      | T up vs N                              | 30.376  | 40.0572   | 21.0994    | 1         |
| cg12426293  | RAB12                                        | 0.00021527        | 0.000215269          | 3.17412            | 3.17412                      | T up vs N                              | 22.609  | 12.4954   | 8.84284    | 1         |
| cg12426652  | CLDN14;CLDN14                                | 0.00110008        | 0.00110008           | 5.20945            | 5.20945                      | T up vs N                              | 15.758  | 25.514    | 25.9058    | 1         |
| cg12427264  | STX11                                        | 1.87E-05          | 1.87E-05             | 4.70295            | 4.70295                      | T up vs N                              | 35.941  | 22.4497   | 9.9941     | 1         |
| cg12428378  | PGLYRP3                                      | 0.00013063        | 0.000130631          | 0.272631           | -3.66796                     | T down vs N                            | 25.009  | 15.82     | 10.1211    | 1         |
| cg12428514  | UCN3;UCN3                                    | 8.19E-05          | 8.19E-05             | 0.192145           | -5.2044                      | T down vs N                            | 27.392  | 25.484    | 14.8853    | 1         |
| cg12432303  | OR6M1                                        | 0.00118841        | 0.00118841           | 0.307766           | -3.24923                     | T down vs N                            | 15.468  | 13.0065   | 13.4538    | 1         |
| cg12432580  | CNTNAP1                                      | 0.00536597        | 0.00536597           | 3.03151            | 3.03151                      | T up vs N                              | 10.358  | 11.5205   | 17.7954    | 1         |
| cg12433386  | KCNQ10T1;KCNQ1;KCNQ1                         | 0.00067122        | 0.000671219          | 0.268021           | -3.73106                     | T down vs N                            | 17.683  | 16.2379   | 14.6921    | 1         |
| cg12433473  | CHPF                                         | 0.00380729        | 0.00380729           | 4.84369            | 4.84369                      | T up vs N                              | 11.433  | 23.313    | 32.6246    | 1         |
| cg12434571  | SMTNL2;SMTNL2                                | 0.00103898        | 0.00103898           | 0.309477           | -3.23126                     | T down vs N                            | 15.975  | 12.8843   | 12.9049    | 1         |
| cg12435551  | SPAG17                                       | 0.00432023        | 0.00432023           | 0.29637            | -3.37416                     | T down vs N                            | 11.032  | 13.8527   | 20.0917    | 1         |
| cg12436019  | PCCA;PCCA                                    | 0.00486287        | 0.00486287           | 0.320238           | -3.12268                     | T down vs N                            | 10.662  | 12.1443   | 18.2252    | 1         |
| cg12437115  | KRT12                                        | 1.92E-05          | 1.92E-05             | 0.309268           | -3.23344                     | T down vs N                            | 35.786  | 12.8992   | 5.76718    | 1         |
| cg12439325  | TMPRSS12                                     | 0.00125865        | 0.00125865           | 3.87464            | 3.87464                      | T up vs N                              | 15.254  | 17.1826   | 18.0226    | 1         |
| cg12440187  | GNL1                                         | 0.00028289        | 0.000282893          | 0.302004           | -3.31122                     | T down vs N                            | 21.359  | 13.427    | 10.058     | 1         |
| cg12442803  | CDON                                         | 0.00413752        | 0.00413752           | 0.308788           | -3.23847                     | T down vs N                            | 11.168  | 12.9334   | 18.5289    | 1         |
| cg12446763  | RNASEL                                       | 6.61E-06          | 6.61E-06             | 0.174894           | -5.71774                     | T down vs N                            | 42.985  | 28.4736   | 10.5984    | 1         |
| cg12448298  | DPP10                                        | 0.00059211        | 0.000592111          | 0.224686           | -4.45066                     | T down vs N                            | 18.192  | 20.8791   | 18.3634    | 1         |
| cg12448312  | KNDCC1                                       | 0.00287869        | 0.00287869           | 0.320723           | -3.11796                     | T down vs N                            | 12.347  | 12.1121   | 15.6962    | 1         |
| cg12449404  | SLC8A1;SLC8A1;SLC8A1;SLC8A1                  | 0.00045539        | 0.000455386          | 0.327827           | -3.05039                     | T down vs N                            | 19.284  | 11.6498   | 9.66612    | 1         |
| cg12449852  | LCE1B;LCE1B                                  | 0.00621316        | 0.00621316           | 0.311311           | -3.21222                     | T down vs N                            | 9.9138  | 12.7549   | 20.5852    | 1         |
| cg12454169  | LCLAT1;LCLAT1                                | 0.00055741        | 0.000557409          | 0.289005           | -3.46015                     | T down vs N                            | 18.44   | 14.4319   | 12.5224    | 1         |
| cg12454705  | CCNY;CCNY                                    | 0.00221896        | 0.00221896           | 0.314586           | -3.17878                     | T down vs N                            | 13.228  | 12.5271   | 15.1528    | 1         |
| cg12456799  | SORCS3                                       | 0.00011977        | 0.000119771          | 15.9613            | 15.9613                      | T up vs N                              | 25.442  | 71.8742   | 45.2007    | 1         |
| cg12456973  | STK19;STK19;STK19;DOM3Z                      | 0.00113454        | 0.00113454           | 0.251548           | -3.97538                     | T down vs N                            | 15.642  | 17.8401   | 18.2485    | 1         |

| Probeset ID                                                                                     | UCSC_REFGENE_NAME             | p-value<br>(Type) | p-value (T vs.<br>N) | Ratio (T<br>vs. N) | Fold-<br>Change (T<br>vs. N) | Fold-Change (T vs.<br>N) (Description) | F(Type) | SS (Type) | SS (Error) | F (Error) |
|-------------------------------------------------------------------------------------------------|-------------------------------|-------------------|----------------------|--------------------|------------------------------|----------------------------------------|---------|-----------|------------|-----------|
| cg12458003                                                                                      | NFASC;NFASC;NFASC;NFASC       | 7.91E-06          | 7.91E-06             | 4.48643            | 4.48643                      | T up vs N                              | 41.699  | 21.1036   | 8.09754    | 1         |
| cg12458485                                                                                      | GMPPA                         | 7.87E-06          | 7.87E-06             | 3.31312            | 3.31312                      | T up vs N                              | 41.743  | 13.4399   | 5.15153    | 1         |
| cg12458970                                                                                      | SLC12A5;SLC12A5               | 0.00685515        | 0.00685515           | 0.300593           | -3.32676                     | T down vs N                            | 9.6207  | 13.5322   | 22.5052    | 1         |
| cg12459759                                                                                      | ACN9                          | 1.19E-05          | 1.19E-05             | 0.230803           | -4.3327                      | T down vs N                            | 38.897  | 20.1346   | 8.2822     | 1         |
| PCDHGA4;PCDHGA6;PCDHGA1;PCDHG<br>A7;PCDHGA5;PCDHGB1;PCDHGA3;PC<br>DHGA7;PCDHGA2;PCDHGB2;PCDHGB3 |                               |                   |                      |                    |                              |                                        |         |           |            |           |
| cg12459904                                                                                      |                               | 0.00020314        | 0.00020314           | 3.8855             | 3.8855                       | T up vs N                              | 22.88   | 17.2537   | 12.0657    | 1         |
| cg12461551                                                                                      | RAPGEF4;RAPGEF4               | 0.00111272        | 0.00111272           | 0.203856           | -4.90542                     | T down vs N                            | 15.715  | 23.6887   | 24.1184    | 1         |
| cg12461930                                                                                      | GJC2                          | 0.00042255        | 0.000422548          | 0.228883           | -4.36904                     | T down vs N                            | 19.602  | 20.3646   | 16.6228    | 1         |
| cg12463578                                                                                      | ZFP57                         | 1.97E-05          | 1.97E-05             | 0.124458           | -8.03484                     | T down vs N                            | 35.614  | 40.6694   | 18.2714    | 1         |
| cg12463851                                                                                      | CXCR7                         | 9.54E-06          | 9.54E-06             | 15.934             | 15.934                       | T up vs N                              | 40.391  | 71.7854   | 28.4359    | 1         |
| cg12464898                                                                                      | KCNB2                         | 9.34E-06          | 9.34E-06             | 0.160446           | -6.23264                     | T down vs N                            | 40.539  | 31.3595   | 12.3772    | 1         |
| cg12465250                                                                                      | PACRG;PACRG;PACRG             | 0.00700197        | 0.00700197           | 3.64936            | 3.64936                      | T up vs N                              | 9.558   | 15.6964   | 26.2756    | 1         |
| cg12465710                                                                                      | UTF1                          | 0.0005498         | 0.000549803          | 3.09308            | 3.09308                      | T up vs N                              | 18.496  | 11.942    | 10.3302    | 1         |
| cg12466700                                                                                      | MITF                          | 0.00102109        | 0.00102109           | 0.241687           | -4.13758                     | T down vs N                            | 16.041  | 18.8889   | 18.8411    | 1         |
| cg12468238                                                                                      | IRX1                          | 1.07E-07          | 1.07E-07             | 0.150155           | -6.65979                     | T down vs N                            | 82.04   | 33.6727   | 6.56711    | 1         |
| cg12473285                                                                                      | SOST                          | 0.00034753        | 0.000347533          | 12.1904            | 12.1904                      | T up vs N                              | 20.447  | 58.5689   | 45.8318    | 1         |
| cg12476455                                                                                      | NASP;NASP;NASP                | 0.00421067        | 0.00421067           | 0.272361           | -3.6716                      | T down vs N                            | 11.113  | 15.8441   | 22.8123    | 1         |
| cg12478185                                                                                      | C17orf48;SCO1                 | 0.00063157        | 0.000631569          | 0.235647           | -4.24363                     | T down vs N                            | 17.929  | 19.5681   | 17.4625    | 1         |
| cg12478440                                                                                      | EXOC3L2                       | 0.00129585        | 0.00129585           | 0.217417           | -4.59946                     | T down vs N                            | 15.146  | 21.809    | 23.038     | 1         |
| cg12479674                                                                                      | TRIMS9                        | 0.00114855        | 0.00114855           | 16.4516            | 16.4516                      | T up vs N                              | 15.596  | 73.4528   | 75.3568    | 1         |
| cg12483005                                                                                      | LUZP1;LUZP1                   | 0.00019749        | 0.000197489          | 0.31103            | -3.21512                     | T down vs N                            | 23.012  | 12.7746   | 8.88197    | 1         |
| cg12483927                                                                                      | RD3;RD3                       | 0.00390754        | 0.00390754           | 0.324504           | -3.08163                     | T down vs N                            | 11.35   | 11.8637   | 16.7239    | 1         |
| cg12485556                                                                                      | PREP                          | 0.00020299        | 0.000202985          | 0.237043           | -4.21865                     | T down vs N                            | 22.883  | 19.4086   | 13.5705    | 1         |
| cg12485926                                                                                      | ORSB3                         | 0.00031239        | 0.00031239           | 0.190234           | -5.25668                     | T down vs N                            | 20.916  | 25.7938   | 19.7309    | 1         |
| cg12486308                                                                                      | LTBP4;LTBP4;LTBP4             | 0.0038538         | 0.0038538            | 0.171809           | -5.82043                     | T down vs N                            | 11.394  | 29.0579   | 40.803     | 1         |
| cg12486635                                                                                      | INHBC                         | 4.92E-05          | 4.92E-05             | 0.268746           | -3.72098                     | T down vs N                            | 30.169  | 16.1713   | 8.57642    | 1         |
| PCDHGA2;PCDHGA4;PCDHGA1;PCDHG<br>B1;PCDHGA3;PCDHGA4                                             |                               |                   |                      |                    |                              |                                        |         |           |            |           |
| cg12487540                                                                                      |                               | 9.64E-05          | 9.64E-05             | 3.93099            | 3.93099                      | T up vs N                              | 26.544  | 17.5509   | 10.5791    | 1         |
| cg12487792                                                                                      | TMX3;CCDC102B                 | 0.00013815        | 0.000138148          | 0.31214            | -3.20369                     | T down vs N                            | 24.733  | 12.6968   | 8.21384    | 1         |
| C11orf57;PIH1D2;C11orf57;PIH1D2;C1<br>1orf57                                                    |                               |                   |                      |                    |                              |                                        |         |           |            |           |
| cg12488558                                                                                      |                               | 2.13E-05          | 2.13E-05             | 0.196857           | -5.07984                     | T down vs N                            | 35.124  | 24.741    | 11.2704    | 1         |
| cg12489846                                                                                      | ULBP1                         | 3.92E-05          | 3.92E-05             | 0.191621           | -5.21862                     | T down vs N                            | 31.451  | 25.5685   | 13.0075    | 1         |
| cg12491966                                                                                      | COL18A1;COL18A1;COL18A1       | 0.00061255        | 0.000612551          | 0.327187           | -3.05636                     | T down vs N                            | 18.054  | 11.6907   | 10.361     | 1         |
| cg12493906                                                                                      | MMP26                         | 2.68E-05          | 2.68E-05             | 0.128556           | -7.7787                      | T down vs N                            | 33.698  | 39.4147   | 18.7143    | 1         |
| cg12494545                                                                                      | OPA3;OPA3                     | 2.38E-05          | 2.38E-05             | 6.14793            | 6.14793                      | T up vs N                              | 34.428  | 30.8922   | 14.3569    | 1         |
| cg12495333                                                                                      | KRT79                         | 3.79E-05          | 3.79E-05             | 0.330492           | -3.02579                     | T down vs N                            | 31.648  | 11.4813   | 5.80451    | 1         |
| cg12497190                                                                                      | BEND6                         | 3.69E-05          | 3.69E-05             | 0.316187           | -3.16268                     | T down vs N                            | 31.803  | 12.4174   | 6.24707    | 1         |
| cg12502564                                                                                      | MYOCD;MYOCD;MYOCD             | 2.12E-05          | 2.12E-05             | 0.308686           | -3.23954                     | T down vs N                            | 35.16   | 12.9406   | 5.88879    | 1         |
| cg12504247                                                                                      | GUCY2D                        | 4.50E-06          | 4.50E-06             | 3.30366            | 3.30366                      | T up vs N                              | 45.83   | 13.3758   | 4.66969    | 1         |
| cg12505153                                                                                      | CFD                           | 1.30E-05          | 1.30E-05             | 0.180574           | -5.5379                      | T down vs N                            | 38.305  | 27.4393   | 11.4613    | 1         |
| cg12506582                                                                                      | RPS3;SNORD15B                 | 0.00524814        | 0.00524814           | 0.170527           | -5.86418                     | T down vs N                            | 10.643  | 27.5817   | 38.8718    | 1         |
| cg12507125                                                                                      | WWTR1;WWTR1;WWTR1             | 3.94E-06          | 3.94E-06             | 18.0864            | 18.0864                      | T up vs N                              | 46.857  | 78.5068   | 26.8073    | 1         |
| cg12509268                                                                                      | NCOR2;NCOR2                   | 0.00485819        | 0.00485819           | 4.42986            | 4.42986                      | T up vs N                              | 10.665  | 20.7483   | 31.1286    | 1         |
| cg12513994                                                                                      | ADARB2                        | 5.09E-05          | 5.09E-05             | 0.158776           | -6.29817                     | T down vs N                            | 29.979  | 31.719    | 16.9288    | 1         |
| cg12515917                                                                                      | TG                            | 9.11E-06          | 9.11E-06             | 0.315617           | -3.16839                     | T down vs N                            | 40.714  | 12.4563   | 4.89511    | 1         |
| cg12516187                                                                                      | SLC6A3                        | 0.00132638        | 0.00132638           | 0.27006            | -3.70288                     | T down vs N                            | 15.061  | 16.0515   | 17.0528    | 1         |
| cg12517191                                                                                      | TFDP1;TFDP1                   | 0.0052677         | 0.0052677            | 0.309245           | -3.23368                     | T down vs N                            | 10.415  | 12.9008   | 19.8192    | 1         |
| cg12518146                                                                                      | F2RL1                         | 6.02E-05          | 6.02E-05             | 6.61917            | 6.61917                      | T up vs N                              | 29.049  | 33.4558   | 18.4272    | 1         |
| cg12523109                                                                                      | SPANXN5                       | 0.00150376        | 0.00150376           | 0.247047           | -4.04782                     | T down vs N                            | 14.602  | 18.3099   | 20.0629    | 1         |
| cg12523932                                                                                      | KLB                           | 0.00048214        | 0.000482143          | 8.1593             | 8.1593                       | T up vs N                              | 19.043  | 41.2717   | 34.6765    | 1         |
| cg12524061                                                                                      | SDR9C7                        | 7.34E-05          | 7.34E-05             | 0.195325           | -5.11968                     | T down vs N                            | 27.974  | 24.9795   | 14.2874    | 1         |
| cg12524698                                                                                      | RPLP2                         | 0.00321219        | 0.00321219           | 0.250839           | -3.98663                     | T down vs N                            | 12.262  | 16.8594   | 20.624     | 1         |
| cg12526834                                                                                      | OAF                           | 2.05E-05          | 2.05E-05             | 0.21261            | -4.70345                     | T down vs N                            | 35.362  | 22.4528   | 10.1592    | 1         |
| cg12527684                                                                                      | EIF4E;EIF4E;EIF4E;EIF4E;EIF4E | 1.93E-05          | 1.93E-05             | 0.226035           | -4.42409                     | T down vs N                            | 35.732  | 20.712    | 9.27448    | 1         |
| cg12528056                                                                                      | GPR44                         | 2.55E-05          | 2.55E-05             | 6.37944            | 6.37944                      | T up vs N                              | 34.018  | 32.1625   | 15.1271    | 1         |
| cg12528835                                                                                      | RPS11;SNORD35B                | 0.00235498        | 0.00235498           | 0.233593           | -4.28095                     | T down vs N                            | 13.024  | 19.8059   | 24.3325    | 1         |
| cg12530994                                                                                      | AKR1C3                        | 1.33E-06          | 1.33E-06             | 0.117659           | -8.49913                     | T down vs N                            | 55.858  | 42.8918   | 12.2859    | 1         |
| cg12531838                                                                                      | DIP2C                         | 0.00459729        | 0.00459729           | 0.326631           | -3.06156                     | T down vs N                            | 10.837  | 11.7264   | 17.3139    | 1         |
| cg12534008                                                                                      | AMH                           | 7.30E-06          | 7.30E-06             | 7.35892            | 7.35892                      | T up vs N                              | 42.271  | 37.3117   | 14.1228    | 1         |
| cg12534424                                                                                      | PRRT4                         | 0.00022642        | 0.000226418          | 4.93502            | 4.93502                      | T up vs N                              | 22.375  | 23.8683   | 17.0681    | 1         |
| cg12535744                                                                                      | MAML2                         | 0.00296048        | 0.00296048           | 0.290407           | -3.44345                     | T down vs N                            | 12.253  | 14.3196   | 18.6979    | 1         |
| cg12544243                                                                                      | GRIN3B                        | 0.00036164        | 0.000361641          | 0.270317           | -3.69936                     | T down vs N                            | 20.273  | 16.0281   | 12.65      | 1         |
| cg12544401                                                                                      | MIR1256                       | 4.82E-06          | 4.82E-06             | 0.204985           | -4.8784                      | T down vs N                            | 45.311  | 23.5245   | 8.30692    | 1         |
| cg12544557                                                                                      | KRT12                         | 1.34E-05          | 1.34E-05             | 3.41283            | 3.41283                      | T up vs N                              | 38.109  | 14.1135   | 5.92552    | 1         |
| cg12546793                                                                                      | CD1B                          | 0.00028134        | 0.000281342          | 0.297646           | -3.35969                     | T down vs N                            | 21.384  | 13.7549   | 10.2917    | 1         |
| cg12547930                                                                                      | WFD6C                         | 0.00021377        | 0.000213774          | 0.207782           | -4.81273                     | T down vs N                            | 22.641  | 23.1239   | 16.341     | 1         |
| cg12548176                                                                                      | OR6C74                        | 8.57E-05          | 8.57E-05             | 0.220509           | -4.53496                     | T down vs N                            | 27.158  | 21.4072   | 12.6119    | 1         |
| cg12548693                                                                                      | MIR223                        | 4.34E-05          | 4.34E-05             | 0.184786           | -5.41166                     | T down vs N                            | 30.877  | 26.705    | 13.8381    | 1         |
| cg12550726                                                                                      | PDLIM3;PDLIM3                 | 0.00130833        | 0.00130833           | 0.250575           | -3.99083                     | T down vs N                            | 15.111  | 17.9404   | 18.9958    | 1         |
| cg12551557                                                                                      | BICD1;BICD1                   | 0.00301128        | 0.00301128           | 0.214158           | -4.66944                     | T down vs N                            | 12.197  | 22.2428   | 29.1778    | 1         |

| Probeset ID | UCSC_REFGENE_NAME                                                | p-value<br>(Type) | p-value (T vs.<br>N) | Ratio (T<br>vs. N) | Fold-<br>Change (T<br>vs. N) | Fold-Change (T vs.<br>N) (Description) | F(Type) | SS (Type) | SS (Error) | F (Error) |
|-------------|------------------------------------------------------------------|-------------------|----------------------|--------------------|------------------------------|----------------------------------------|---------|-----------|------------|-----------|
| cg12553321  | PGK2                                                             | 0.00014111        | 0.000141114          | 0.249011           | -4.01589                     | T down vs N                            | 24.628  | 18.1031   | 11.761     | 1         |
| cg12554051  | B4GALNT3                                                         | 0.00101368        | 0.00101368           | 0.163592           | -6.11278                     | T down vs N                            | 16.068  | 30.6974   | 30.5669    | 1         |
| cg12554678  | FCGBP                                                            | 0.00055556        | 0.000555555          | 0.205337           | -4.87004                     | T down vs N                            | 18.454  | 23.4736   | 20.3526    | 1         |
| cg12559170  | HBG2                                                             | 0.00382431        | 0.00382431           | 0.264848           | -3.77575                     | T down vs N                            | 11.419  | 16.5329   | 23.1654    | 1         |
| cg12559208  | TMC4;TMC4                                                        | 0.00030105        | 0.000301046          | 6.85537            | 6.85537                      | T up vs N                              | 21.081  | 34.7086   | 26.3431    | 1         |
| cg12559685  | CNTNAP1                                                          | 1.16E-07          | 1.16E-07             | 4.98249            | 4.98249                      | T up vs N                              | 81.063  | 24.1554   | 4.76775    | 1         |
| cg12560772  | MCHR2;MCHR2                                                      | 0.00070426        | 0.000704255          | 0.293268           | -3.40985                     | T down vs N                            | 17.491  | 14.0934   | 12.8923    | 1         |
| cg12562403  | TSPAN9;TSPAN9                                                    | 1.65E-05          | 1.65E-05             | 0.290633           | -3.44076                     | T down vs N                            | 36.725  | 14.3015   | 6.2307     | 1         |
| cg12564012  | SDK1                                                             | 0.00245509        | 0.00245509           | 0.223965           | -4.46498                     | T down vs N                            | 12.882  | 20.969    | 26.0451    | 1         |
| cg12564285  | PDLIM4;PDLIM4                                                    | 0.0008614         | 0.000861395          | 3.52384            | 3.52384                      | T up vs N                              | 16.696  | 14.8591   | 14.2399    | 1         |
| cg12565681  | RHBDF2;RHBDF2                                                    | 0.00415095        | 0.00415095           | 10.4318            | 10.4318                      | T up vs N                              | 11.158  | 51.4987   | 73.8472    | 1         |
| cg12569497  | COL21A1                                                          | 4.12E-05          | 4.12E-05             | 4.25149            | 4.25149                      | T up vs N                              | 31.176  | 19.6183   | 10.0684    | 1         |
| cg12570309  | FARSA                                                            | 1.83E-05          | 1.83E-05             | 0.206569           | -4.84099                     | T down vs N                            | 36.074  | 23.2965   | 10.3326    | 1         |
| cg12571493  | HMGB2;HMGB2                                                      | 1.43E-05          | 1.43E-05             | 0.243853           | -4.10083                     | T down vs N                            | 37.659  | 18.6523   | 7.92472    | 1         |
| cg12571879  | C19orf59;C19orf59                                                | 0.00222027        | 0.00222027           | 0.141944           | -7.04504                     | T down vs N                            | 13.226  | 35.6998   | 43.189     | 1         |
| cg12572278  | OAF                                                              | 0.00030381        | 0.000303813          | 0.23902            | -4.18375                     | T down vs N                            | 21.04   | 19.1852   | 14.5894    | 1         |
| cg12573705  | MIR548F5;NBEA;MAB21L1                                            | 0.00433355        | 0.00433355           | 0.289401           | -3.45541                     | T down vs N                            | 11.022  | 14.4001   | 20.904     | 1         |
| cg12575674  | SH2D4B;SH2D4B                                                    | 6.64E-07          | 6.64E-07             | 0.207862           | -4.81089                     | T down vs N                            | 62.239  | 23.1126   | 5.94168    | 1         |
| cg12578211  | C1orf53                                                          | 0.00161164        | 0.00161164           | 0.3175             | -3.14961                     | T down vs N                            | 14.352  | 12.3282   | 13.7437    | 1         |
| cg12578575  | DPRX                                                             | 0.00034154        | 0.000341539          | 0.250631           | -3.61493                     | T down vs N                            | 20.523  | 15.4674   | 12.0587    | 1         |
| cg12580445  | LOX                                                              | 2.31E-07          | 2.31E-07             | 0.292403           | -3.41993                     | T down vs N                            | 73.117  | 14.1613   | 3.09889    | 1         |
| cg12580783  | WNT10B                                                           | 4.26E-06          | 4.26E-06             | 0.213835           | -4.6765                      | T down vs N                            | 46.257  | 22.2864   | 7.70869    | 1         |
| cg12581741  | ADARB2                                                           | 6.39E-05          | 6.39E-05             | 0.149905           | -6.67088                     | T down vs N                            | 28.72   | 33.7319   | 18.7921    | 1         |
| cg12582003  | DNM1;DNM1                                                        | 0.00041348        | 0.000413483          | 3.9364             | 3.9364                       | T up vs N                              | 19.694  | 17.5862   | 14.2873    | 1         |
| cg12582028  | OA23;MRPL9                                                       | 6.38E-05          | 6.38E-05             | 0.225876           | -4.4272                      | T down vs N                            | 28.734  | 20.7315   | 11.5441    | 1         |
| cg12582616  | JARID2                                                           | 0.00038897        | 0.000388965          | 0.2865             | -3.4904                      | T down vs N                            | 19.957  | 14.635    | 11.7332    | 1         |
| cg12582654  | KCP;KCP                                                          | 1.63E-05          | 1.63E-05             | 12.138             | 12.138                       | T up vs N                              | 36.804  | 58.3673   | 25.3746    | 1         |
| cg12583325  | MDH2                                                             | 0.00030131        | 0.000301309          | 0.250287           | -3.99542                     | T down vs N                            | 21.077  | 17.9703   | 13.6415    | 1         |
| cg12583367  | D4S234E;D4S234E                                                  | 0.00044832        | 0.000448321          | 0.285267           | -3.50549                     | T down vs N                            | 19.35   | 14.7362   | 12.1851    | 1         |
| cg12583550  | VSIG10L                                                          | 4.68E-05          | 4.68E-05             | 0.302083           | -3.31035                     | T down vs N                            | 30.447  | 13.4211   | 7.05288    | 1         |
| cg12583553  | RPS18                                                            | 0.00040207        | 0.000402066          | 0.26268            | -3.80691                     | T down vs N                            | 19.814  | 16.7381   | 13.5159    | 1         |
| cg12583591  | MUC16                                                            | 1.14E-06          | 1.14E-06             | 0.103743           | -9.63921                     | T down vs N                            | 57.177  | 48.0861   | 13.456     | 1         |
| cg12584111  | MOXD2                                                            | 0.00030449        | 0.00030449           | 0.194112           | -5.15166                     | T down vs N                            | 21.03   | 25.1703   | 19.1498    | 1         |
| cg12584826  | PDZRN3                                                           | 0.00073042        | 0.000730421          | 0.278663           | -3.58856                     | T down vs N                            | 17.345  | 15.2917   | 14.1058    | 1         |
| cg12587960  | OVOL2                                                            | 8.74E-07          | 8.74E-07             | 0.140499           | -7.11749                     | T down vs N                            | 59.638  | 36.0749   | 9.67835    | 1         |
| cg12589143  | HCG4P6                                                           | 1.91E-05          | 1.91E-05             | 21.9267            | 21.9267                      | T up vs N                              | 35.804  | 89.2962   | 39.905     | 1         |
| cg12589308  | ATP8B3                                                           | 4.83E-05          | 4.83E-05             | 0.162984           | -6.13558                     | T down vs N                            | 30.273  | 30.8238   | 16.2911    | 1         |
| cg12590005  | MAPK14;MAPK14;MAPK14;MAPK14<br>CAMKK2;CAMKK2;CAMKK2;CAMKK2;C     | 1.26E-05          | 1.26E-05             | 0.268465           | -3.72488                     | T down vs N                            | 38.523  | 16.1971   | 6.72733    | 1         |
| cg12590521  | AMKK2                                                            | 2.38E-06          | 2.38E-06             | 0.087264           | -11.4595                     | T down vs N                            | 50.863  | 55.7082   | 17.5242    | 1         |
| cg12591315  | CLEC2B                                                           | 2.25E-07          | 2.25E-07             | 0.205001           | -4.87802                     | T down vs N                            | 73.428  | 23.5222   | 5.12552    | 1         |
| cg12592359  | ASXL1;ASXL1                                                      | 0.00010402        | 0.000104015          | 0.174574           | -5.72823                     | T down vs N                            | 26.155  | 28.5335   | 17.4547    | 1         |
| cg12593634  | ORS2A4                                                           | 2.11E-05          | 2.11E-05             | 0.248794           | -4.01939                     | T down vs N                            | 35.182  | 18.1258   | 8.2431     | 1         |
| cg12594800  | ELF4;ELF4                                                        | 0.00113595        | 0.00113595           | 0.321346           | -3.11191                     | T down vs N                            | 15.637  | 12.0707   | 12.3508    | 1         |
| cg12594940  | SNORD115-40                                                      | 7.16E-05          | 7.16E-05             | 0.107              | -9.34578                     | T down vs N                            | 28.107  | 46.7829   | 26.6314    | 1         |
| cg12596182  | BEST3;BEST3;BEST3                                                | 0.0043242         | 0.0043242            | 0.270005           | -3.70363                     | T down vs N                            | 11.029  | 16.0564   | 23.2941    | 1         |
| cg12596487  | C18orf1;C18orf1                                                  | 0.00559341        | 0.00559341           | 0.137334           | -3.15125                     | T down vs N                            | 10.231  | 12.3394   | 19.2964    | 1         |
| cg12596914  | EPHA8;EPHA8                                                      | 1.90E-05          | 1.90E-05             | 0.325404           | -3.07311                     | T down vs N                            | 35.841  | 11.8054   | 5.27006    | 1         |
| cg12597389  | NXP1                                                             | 3.75E-06          | 3.75E-06             | 55.3235            | 55.3235                      | T up vs N                              | 47.222  | 150.849   | 51.1113    | 1         |
| cg12598340  | TMEM54                                                           | 0.00030692        | 0.000306915          | 0.323251           | -3.09357                     | T down vs N                            | 20.995  | 11.9454   | 9.10341    | 1         |
| cg12601142  | KDM5A;KDM5A                                                      | 0.00579563        | 0.00579563           | 0.299869           | -3.33479                     | T down vs N                            | 10.124  | 13.5866   | 21.4732    | 1         |
| cg12601933  | TNFRSF1B                                                         | 7.44E-05          | 7.44E-05             | 0.27057            | -3.69591                     | T down vs N                            | 27.9    | 16.0053   | 9.17877    | 1         |
| cg12604169  | MS4A4A;MS4A4A<br>CASP8;CASP8;CASP8;CASP8;CASP8;CA                | 7.42E-08          | 7.42E-08             | 0.140894           | -7.09753                     | T down vs N                            | 86.577  | 35.9717   | 6.64784    | 1         |
| cg12604794  | SP8                                                              | 1.95E-07          | 1.95E-07             | 0.31445            | -3.18016                     | T down vs N                            | 75.017  | 12.5365   | 2.67386    | 1         |
| cg12605662  | RAX                                                              | 5.85E-05          | 5.85E-05             | 0.015304           | -65.3445                     | T down vs N                            | 29.201  | 163.624   | 89.6543    | 1         |
| cg12606911  | CD8A                                                             | 0.0002797         | 0.000279695          | 11.8053            | 11.8053                      | T up vs N                              | 21.411  | 57.0748   | 42.6517    | 1         |
| cg12606933  | SOX30;SOX30                                                      | 7.05E-06          | 7.05E-06             | 5.47132            | 5.47132                      | T up vs N                              | 42.517  | 27.0529   | 10.1805    | 1         |
| cg12608247  | LOC643387;LOC151174;LOC151174<br>EEF1B2;EEF1B2;SNORD51;NDUF51;SN | 0.00079075        | 0.000790754          | 5.40562            | 5.40562                      | T up vs N                              | 17.031  | 26.6697   | 25.0552    | 1         |
| cg12608507  | ORA41;EEF1B2                                                     | 1.65E-05          | 1.65E-05             | 0.171632           | -5.8264                      | T down vs N                            | 36.747  | 29.0918   | 12.667     | 1         |
| cg12608565  | CHRNAE;C17orf107                                                 | 4.08E-06          | 4.08E-06             | 5.09656            | 5.09656                      | T up vs N                              | 46.575  | 24.8412   | 8.53374    | 1         |
| cg12611488  | SKI                                                              | 0.00086047        | 0.000860469          | 6.24376            | 6.24376                      | T up vs N                              | 16.7    | 31.4206   | 30.1036    | 1         |
| cg12612445  | C21orf67                                                         | 2.05E-05          | 2.05E-05             | 0.277204           | -3.60745                     | T down vs N                            | 35.35   | 15.4176   | 6.97835    | 1         |
| cg12614105  | NPY                                                              | 0.00302182        | 0.00302182           | 4.82498            | 4.82498                      | T up vs N                              | 12.186  | 23.1987   | 30.4607    | 1         |
| cg12615761  | RAB12<br>NFASC;NFASC;NFASC;NFASC;NFASC;N                         | 0.00026107        | 0.000261069          | 6.16094            | 6.16094                      | T up vs N                              | 21.722  | 30.9642   | 22.8075    | 1         |
| cg12616766  | FASC                                                             | 0.00012109        | 0.000121093          | 3.65965            | 3.65965                      | T up vs N                              | 25.387  | 15.7648   | 9.93575    | 1         |
| cg12616941  | BMI1                                                             | 0.00013056        | 0.000130555          | 0.289441           | -3.45494                     | T down vs N                            | 25.012  | 14.3969   | 9.20963    | 1         |
| cg12618270  | MFHAS1                                                           | 0.00120637        | 0.00120637           | 0.32452            | -3.08147                     | T down vs N                            | 15.412  | 11.8626   | 12.3152    | 1         |

| Probeset ID | UCSC_REFGENE_NAME            | p-value<br>(Type) | p-value (T vs.<br>N) | Ratio (T<br>vs. N) | Fold-<br>Change (T<br>vs. N) | Fold-Change (T vs.<br>N) (Description) | F(Type) | SS (Type) | SS (Error) | F (Error) |
|-------------|------------------------------|-------------------|----------------------|--------------------|------------------------------|----------------------------------------|---------|-----------|------------|-----------|
| cg12618806  | DLGAP2                       | 0.00175549        | 0.00175549           | 0.331141           | -3.01986                     | T down vs N                            | 14.047  | 11.4407   | 13.0315    | 1         |
| cg12619509  | DNASE1L2                     | 7.62E-05          | 7.62E-05             | 3.26985            | 3.26985                      | T up vs N                              | 27.779  | 13.1465   | 7.57211    | 1         |
| cg12619940  | OSR1                         | 1.50E-05          | 1.50E-05             | 9.60029            | 9.60029                      | T up vs N                              | 37.363  | 47.9145   | 20.5187    | 1         |
| cg12621203  | TCEA3                        | 0.00010042        | 0.000100417          | 10.2283            | 10.2283                      | T up vs N                              | 26.336  | 50.6367   | 30.7641    | 1         |
| cg12623107  | GTF2H1;GTF2H1                | 0.00108172        | 0.00108172           | 0.33289            | -3.00399                     | T down vs N                            | 15.822  | 11.3319   | 11.4597    | 1         |
| cg12623982  | EMX2OS                       | 0.00065346        | 0.000653458          | 0.116162           | -8.60868                     | T down vs N                            | 17.791  | 43.4068   | 39.0361    | 1         |
| cg12626411  | PRG4;PRG4;PRG4;MIR548F1;PRG4 | 0.00027086        | 0.000270863          | 0.312978           | -3.19511                     | T down vs N                            | 21.555  | 12.6384   | 9.38121    | 1         |
| cg12626882  | DNAH9;DNAH9;DNAH9            | 2.18E-06          | 2.18E-06             | 0.203978           | -4.9025                      | T down vs N                            | 51.582  | 23.671    | 7.34246    | 1         |
| cg12627354  | LRP4                         | 0.00033227        | 0.000332274          | 0.302376           | -3.30714                     | T down vs N                            | 20.644  | 13.3994   | 10.3852    | 1         |
| cg12629254  | SNORD115-38                  | 0.00100406        | 0.00100406           | 0.247148           | -4.04616                     | T down vs N                            | 16.105  | 18.2992   | 18.1802    | 1         |
| cg12630983  | FBN2                         | 6.55E-05          | 6.55E-05             | 0.276381           | -3.6182                      | T down vs N                            | 28.584  | 15.4892   | 8.67013    | 1         |
| cg12632832  | ARHGEF11;ARHGEF11            | 0.00055188        | 0.000551878          | 0.236123           | -4.23508                     | T down vs N                            | 18.481  | 19.5136   | 16.8941    | 1         |
| cg12633154  | RNF39;RNF39                  | 0.00086585        | 0.000865854          | 5.48315            | 5.48315                      | T up vs N                              | 16.676  | 27.1217   | 26.0227    | 1         |
| cg12634306  | HEYL                         | 6.31E-05          | 6.31E-05             | 13.8557            | 13.8557                      | T up vs N                              | 28.786  | 64.7206   | 35.9738    | 1         |
| cg12634591  | HOXD3                        | 0.0001965         | 0.0001965            | 0.08601            | 0.08601                      | T up vs N                              | 23.036  | 40.9176   | 28.4201    | 1         |
| cg12634840  | NHP2;NHP2                    | 5.53E-05          | 5.53E-05             | 0.305698           | -3.27121                     | T down vs N                            | 29.516  | 13.1557   | 13.1555    | 1         |
| cg12635662  | PLACL1                       | 9.12E-06          | 9.12E-06             | 0.18196            | -5.49571                     | T down vs N                            | 40.708  | 27.1947   | 10.6886    | 1         |
| cg12636785  | PLD5                         | 2.12E-05          | 2.12E-05             | 0.253846           | -3.9394                      | T down vs N                            | 35.143  | 17.6058   | 8.01554    | 1         |
| cg12637676  | GATA4                        | 0.00442722        | 0.00442722           | 0.301205           | -3.32                        | T down vs N                            | 10.955  | 13.4865   | 19.698     | 1         |
| cg12639192  | WDR37                        | 0.00014072        | 0.000140717          | 0.283829           | -3.52325                     | T down vs N                            | 24.642  | 14.8552   | 9.64548    | 1         |
| cg12640930  | TNN                          | 2.65E-05          | 2.65E-05             | 0.277423           | -3.60461                     | T down vs N                            | 33.774  | 15.3986   | 7.29488    | 1         |
| cg12640942  | MIR190B                      | 7.27E-05          | 7.27E-05             | 0.277043           | -3.60954                     | T down vs N                            | 28.028  | 15.4315   | 8.80909    | 1         |
| cg12642289  | ODZ4                         | 0.0001073         | 0.000107301          | 0.270492           | -3.69697                     | T down vs N                            | 25.997  | 16.0123   | 9.85489    | 1         |
| cg12642717  | CIDEA;CIDEA                  | 0.00371824        | 0.00371824           | 0.37969            | 3.07969                      | T up vs N                              | 11.509  | 11.8504   | 16.4742    | 1         |
| cg12647497  | GSTM2;GSTM2                  | 3.14E-06          | 3.14E-06             | 0.281543           | -3.55186                     | T down vs N                            | 48.615  | 15.0466   | 4.95209    | 1         |
| cg12647801  | PLCB3                        | 4.54E-05          | 4.54E-05             | 0.232889           | -4.29389                     | T down vs N                            | 30.613  | 19.8882   | 10.3948    | 1         |
| cg12648201  | KRTCAP3;KRTCAP3              | 5.76E-05          | 5.76E-05             | 10.0846            | 10.0846                      | T up vs N                              | 29.287  | 50.0224   | 27.3277    | 1         |
| cg12651712  | CYP4A11                      | 0.00146369        | 0.00146369           | 0.308037           | -3.24636                     | T down vs N                            | 14.7    | 12.987    | 14.1355    | 1         |
| cg12652953  | CRYBB2                       | 9.00E-06          | 9.00E-06             | 0.306481           | -3.26284                     | T down vs N                            | 40.794  | 13.0989   | 5.13765    | 1         |
| cg12655059  | ZNF496                       | 0.00094402        | 0.000944019          | 0.210264           | -4.75592                     | T down vs N                            | 16.341  | 22.7757   | 22.3002    | 1         |
| cg12656312  | ORS6A4                       | 0.00078257        | 0.000782568          | 0.282038           | -3.54562                     | T down vs N                            | 17.072  | 15.0049   | 14.0627    | 1         |
| cg12656851  | FAM19A1                      | 0.00035131        | 0.000351314          | 0.185971           | -5.37718                     | T down vs N                            | 20.399  | 26.5032   | 20.7876    | 1         |
| cg12658552  | SFRS2IP                      | 9.89E-05          | 9.89E-05             | 0.233241           | -4.2874                      | T down vs N                            | 26.413  | 19.847    | 12.0224    | 1         |
| cg12658925  | GFI1B;GFI1B                  | 0.0020861         | 0.0020861            | 0.311226           | -3.2131                      | T down vs N                            | 13.441  | 12.7608   | 15.1903    | 1         |
| cg12658947  | OPCML                        | 0.00351327        | 0.00351327           | 6.43003            | 6.43003                      | T up vs N                              | 11.692  | 32.4373   | 44.3876    | 1         |
| cg12658982  | PRR15;PRR15                  | 0.00314991        | 0.00314991           | 7.38668            | 7.38668                      | T up vs N                              | 12.049  | 37.4526   | 49.735     | 1         |
| cg12659009  | FBXL21                       | 7.15E-05          | 7.15E-05             | 0.168798           | -5.92423                     | T down vs N                            | 28.118  | 29.6441   | 16.8682    | 1         |
| cg12659570  | HECW1                        | 0.00037918        | 0.000379183          | 3.68516            | 3.68516                      | T up vs N                              | 20.067  | 15.9341   | 12.7046    | 1         |
| cg12663553  | GCET2;GCET2                  | 0.00599848        | 0.00599848           | 0.332507           | -3.00745                     | T down vs N                            | 10.02   | 11.3556   | 18.1334    | 1         |
| cg12664038  | BCAN;BCAN                    | 0.00039314        | 0.000393144          | 0.24834            | -4.02674                     | T down vs N                            | 19.911  | 18.1735   | 14.6038    | 1         |
| cg12667792  | ZNF366                       | 6.28E-06          | 6.28E-06             | 0.280615           | -3.5636                      | T down vs N                            | 43.353  | 15.125    | 5.5821     | 1         |
| cg12670525  | PARP6;PARP6                  | 0.00137567        | 0.00137567           | 0.31665            | -3.15806                     | T down vs N                            | 14.927  | 12.3858   | 13.2766    | 1         |
| cg12675417  | ENDOD1                       | 0.00089543        | 0.000895428          | 3.74131            | 3.74131                      | T up vs N                              | 16.545  | 16.3056   | 15.7683    | 1         |
| cg12675571  | LOC728264;MIR145             | 0.0006535         | 0.000653502          | 0.135826           | -3.1663                      | T down vs N                            | 17.791  | 12.442    | 11.1894    | 1         |
| cg12676534  | DUSP15;DUSP15;DUSP15         | 2.72E-06          | 2.72E-06             | 4.00639            | 4.00639                      | T up vs N                              | 49.765  | 18.0415   | 5.80055    | 1         |
| cg12678695  | CALN1;CALN1                  | 0.00028746        | 0.000287459          | 0.235912           | -4.23886                     | T down vs N                            | 21.288  | 19.5377   | 14.6848    | 1         |
| cg12679760  | C1orf113;C1orf113            | 0.00048719        | 0.000487193          | 4.68266            | 4.68266                      | T up vs N                              | 18.999  | 22.3245   | 18.8002    | 1         |
| cg12679790  | ATP5E2                       | 0.00010823        | 0.00010823           | 0.265503           | -3.76644                     | T down vs N                            | 25.953  | 16.4715   | 10.1546    | 1         |
| cg12686920  | MEOX1;MEOX1;MEOX1            | 0.00137007        | 0.00137007           | 0.226704           | -4.41104                     | T down vs N                            | 14.941  | 20.6297   | 22.0913    | 1         |
| cg12687069  | ORS1I2                       | 0.00078629        | 0.000786291          | 0.31017            | -3.22404                     | T down vs N                            | 17.053  | 12.8353   | 12.0425    | 1         |
| cg12687157  | MARVELD2;MARVELD2            | 4.07E-05          | 4.07E-05             | 14.0706            | 14.0706                      | T up vs N                              | 31.245  | 65.8008   | 33.5312    | 1         |
| cg12687463  | CFHR1                        | 0.0009284         | 0.000928396          | 0.281462           | -3.55288                     | T down vs N                            | 16.405  | 15.4534   | 14.6814    | 1         |
| cg12689529  | KIRREL3;KIRREL3              | 1.13E-06          | 1.13E-06             | 0.268826           | -3.71988                     | T down vs N                            | 57.279  | 16.164    | 4.51517    | 1         |
| cg12689670  | LAMC1                        | 3.49E-06          | 3.49E-06             | 0.308753           | -3.23884                     | T down vs N                            | 47.791  | 12.9359   | 4.33082    | 1         |
| cg12691427  | EIF2C2;EIF2C2                | 0.00125548        | 0.00125548           | 0.257019           | -3.89077                     | T down vs N                            | 15.264  | 17.2882   | 18.1222    | 1         |
| cg12691739  | CA10;CA10;CA10               | 0.00095509        | 0.000955088          | 0.326494           | -3.06285                     | T down vs N                            | 16.296  | 11.7352   | 11.5218    | 1         |
| cg12691994  | RASSF5;RASSF5;RASSF5         | 9.57E-05          | 9.57E-05             | 0.232354           | -4.30379                     | T down vs N                            | 26.581  | 19.9511   | 12.0092    | 1         |
| cg12693099  | KCNAB1;KCNAB1;KCNAB1         | 8.87E-07          | 8.87E-07             | 0.204774           | -4.88343                     | T down vs N                            | 59.499  | 23.5551   | 6.33425    | 1         |
| cg12693595  | STAT6                        | 0.00184593        | 0.00184593           | 3.06821            | 3.06821                      | T up vs N                              | 13.869  | 11.7719   | 13.5806    | 1         |
| cg12695586  | OXR                          | 1.51E-05          | 1.51E-05             | 11.7382            | 11.7382                      | T up vs N                              | 37.316  | 56.8117   | 24.3593    | 1         |
| cg12695612  | MFAP2;MFAP2;MFAP2;MFAP2      | 4.23E-07          | 4.23E-07             | 0.245101           | -4.07995                     | T down vs N                            | 66.727  | 18.5176   | 4.44023    | 1         |
| cg12697789  | TLR3                         | 0.0001116         | 0.000111602          | 0.257008           | -3.89092                     | T down vs N                            | 25.798  | 17.2892   | 10.723     | 1         |
| cg12700439  | TLE3;TLE3;TLE3               | 0.00374955        | 0.00374955           | 3.03401            | 3.03401                      | T up vs N                              | 11.482  | 11.5377   | 16.077     | 1         |
| cg12700788  | KIF19                        | 0.00066079        | 0.000660792          | 5.23599            | 5.23599                      | T up vs N                              | 17.746  | 25.6714   | 23.1451    | 1         |
| cg12702981  | NR1I2;NR1I2;NR1I2            | 2.32E-05          | 2.32E-05             | 4.60636            | 4.60636                      | T up vs N                              | 34.584  | 21.8519   | 10.1095    | 1         |
| cg12709692  | KCTD8                        | 0.00079611        | 0.000796108          | 0.284167           | -3.51906                     | T down vs N                            | 17.004  | 14.8271   | 13.9513    | 1         |
| cg12710519  | GAB1;GAB1                    | 0.00052211        | 0.000522112          | 4.7943             | 4.7943                       | T up vs N                              | 18.71   | 23.0111   | 19.6776    | 1         |
| cg12710648  | CAMTA1                       | 0.00491024        | 0.00491024           | 0.251149           | -3.98169                     | T down vs N                            | 10.632  | 17.8811   | 26.9103    | 1         |
| cg12711054  | VKORC1L1                     | 4.60E-06          | 4.60E-06             | 0.241594           | -4.13918                     | T down vs N                            | 45.66   | 18.8992   | 6.62264    | 1         |
| cg12717729  | TCEB3                        | 0.00094926        | 0.000949255          | 0.241163           | -4.14657                     | T down vs N                            | 16.32   | 18.9467   | 18.5754    | 1         |
| cg12720971  | PRSSL1                       | 6.76E-05          | 6.76E-05             | 0.269569           | -3.70963                     | T down vs N                            | 28.414  | 16.0961   | 9.06368    | 1         |
| cg12721695  | RING1                        | 0.00013875        | 0.000138745          | 0.307659           | -3.25035                     | T down vs N                            | 24.711  | 13.0141   | 8.42637    | 1         |

| Probeset ID | UCSC_REFGENE_NAME                     | p-value<br>(Type) | p-value (T vs.<br>N) | Ratio (T<br>vs. N) | Fold-<br>Change (T<br>vs. N) | Fold-Change (T vs.<br>N) (Description) | F(Type) | SS (Type) | SS (Error) | F (Error) |
|-------------|---------------------------------------|-------------------|----------------------|--------------------|------------------------------|----------------------------------------|---------|-----------|------------|-----------|
| cg12723011  | FGFBP2                                | 0.0001555         | 0.000155503          | 0.315172           | -3.17288                     | T down vs N                            | 24.154  | 12.4869   | 8.27146    | 1         |
| cg12725323  | LCE1D                                 | 0.00439237        | 0.00439237           | 0.322624           | -3.09959                     | T down vs N                            | 10.979  | 11.9865   | 17.4676    | 1         |
| cg12728461  | CECR4;CECR5;CECR4                     | 0.00340697        | 0.00340697           | 0.279402           | -3.57907                     | T down vs N                            | 11.792  | 15.2283   | 20.6624    | 1         |
| cg12731349  | KISS1                                 | 0.00054571        | 0.000545714          | 4.03594            | 4.03594                      | T up vs N                              | 18.527  | 18.233    | 15.7459    | 1         |
| cg12731671  | LRRN4                                 | 0.00011928        | 0.000119283          | 3.298              | 3.298                        | T up vs N                              | 26.491  | 12.5529   | 7.10779    | 1         |
| cg12732715  | LOC645166;LOC645166;LOC645166         | 5.85E-05          | 5.85E-05             | 0.314966           | -3.17494                     | T down vs N                            | 29.205  | 12.501    | 6.84866    | 1         |
| cg12732953  | FMR1NB                                | 1.53E-05          | 1.53E-05             | 0.173846           | -5.75223                     | T down vs N                            | 37.228  | 28.6703   | 12.3219    | 1         |
| cg12732998  | ZIC1                                  | 0.00114764        | 0.00114764           | 0.161222           | -6.20263                     | T down vs N                            | 15.599  | 31.1942   | 31.9967    | 1         |
| cg12736877  | RNF39;RNF39                           | 0.00044482        | 0.000444823          | 4.96877            | 4.96877                      | T up vs N                              | 19.383  | 24.0725   | 19.8711    | 1         |
| cg12738765  | OR5M10;OR8U8                          | 5.75E-06          | 5.75E-06             | 0.328694           | -3.04235                     | T down vs N                            | 44.006  | 11.5948   | 4.21576    | 1         |
| cg12739419  | CAV2                                  | 6.27E-06          | 6.27E-06             | 0.203765           | -4.90762                     | T down vs N                            | 43.363  | 23.7021   | 8.74548    | 1         |
| cg12740857  | WFDC9                                 | 0.00014253        | 0.000142527          | 0.21116            | -4.73574                     | T down vs N                            | 24.579  | 22.6516   | 14.7453    | 1         |
| cg12741994  | CLDN11                                | 0.00124562        | 0.00124562           | 10.1755            | 10.1755                      | T up vs N                              | 15.293  | 50.4117   | 52.7427    | 1         |
| cg12742178  | IGF1;IGF1;IGF1                        | 1.59E-07          | 1.59E-07             | 0.234072           | -4.27218                     | T down vs N                            | 77.319  | 19.7501   | 4.08697    | 1         |
| cg12743621  | DDOST                                 | 3.43E-05          | 3.43E-05             | 0.331384           | -3.01764                     | T down vs N                            | 32.234  | 11.4255   | 5.67134    | 1         |
| cg12744888  | MYH15                                 | 5.19E-05          | 5.19E-05             | 0.239956           | -4.16742                     | T down vs N                            | 29.863  | 19.0806   | 10.2232    | 1         |
| cg12745325  | SLC39A5;SLC39A5                       | 0.00168533        | 0.00168533           | 0.272741           | -3.66648                     | T down vs N                            | 14.192  | 15.8101   | 17.8242    | 1         |
| cg12746908  | OR8U8                                 | 9.11E-06          | 9.11E-06             | 0.187149           | -5.34334                     | T down vs N                            | 40.713  | 26.3046   | 10.3375    | 1         |
| cg12747469  | CCDC108;CCDC108                       | 0.00403584        | 0.00403584           | 0.330094           | -3.02944                     | T down vs N                            | 11.247  | 11.5064   | 16.3687    | 1         |
| cg12749132  | LOC100132111;C2CD4D                   | 9.59E-06          | 9.59E-06             | 128.949            | 128.949                      | T up vs N                              | 40.359  | 221.172   | 87.6828    | 1         |
| cg12751456  | PAX7;PAX7;PAX7                        | 0.00015228        | 0.000152276          | 0.236599           | -4.22657                     | T down vs N                            | 24.256  | 19.4592   | 12.8359    | 1         |
| cg12752627  | CYP26C1                               | 0.00493063        | 0.00493063           | 0.333198           | -3.00122                     | T down vs N                            | 10.619  | 11.3129   | 17.046     | 1         |
| cg12753858  | C15orf55                              | 8.88E-06          | 8.88E-06             | 0.261128           | -3.82953                     | T down vs N                            | 40.892  | 16.8868   | 6.60743    | 1         |
| cg12757143  | WDR85                                 | 0.00647225        | 0.00647225           | 3.72815            | 3.72815                      | T up vs N                              | 9.7915  | 16.2187   | 26.5024    | 1         |
| cg12757570  | NRGN;NRGN                             | 5.17E-05          | 5.17E-05             | 3.84772            | 3.84772                      | T up vs N                              | 29.886  | 17.0062   | 9.10461    | 1         |
| cg12760508  | AMD1;AMD1                             | 0.00619524        | 0.00619524           | 3.03929            | 3.03929                      | T up vs N                              | 9.9225  | 11.5738   | 18.6628    | 1         |
| cg12760869  | C1QL4                                 | 6.68E-06          | 6.68E-06             | 6.2044             | 6.2044                       | T up vs N                              | 42.915  | 31.204    | 11.6338    | 1         |
| cg12763828  | SLC2A5;SLC2A5;SLC2A5;SLC2A5;SLC2A5    | 0.00053355        | 0.000533552          | 0.182239           | -5.4873                      | T down vs N                            | 18.621  | 27.1458   | 23.3255    | 1         |
| cg12764051  | GTF2H3;EIF2B1                         | 2.51E-06          | 2.51E-06             | 0.278184           | -3.59474                     | T down vs N                            | 50.435  | 15.3329   | 4.86419    | 1         |
| cg12765716  | TRPV4;TRPV4                           | 0.00052645        | 0.00052645           | 0.330662           | -3.02424                     | T down vs N                            | 18.676  | 11.4707   | 9.82706    | 1         |
| cg12766231  | NLRP9                                 | 0.00542278        | 0.00542278           | 0.318191           | -3.14277                     | T down vs N                            | 10.326  | 12.2815   | 19.0301    | 1         |
| cg12768993  | DDX10                                 | 0.00107421        | 0.00107421           | 0.300836           | -3.32407                     | T down vs N                            | 15.848  | 13.5141   | 13.6437    | 1         |
| cg12769118  | C1orf150                              | 1.10E-06          | 1.10E-06             | 0.128492           | -7.7826                      | T down vs N                            | 57.534  | 39.4339   | 10.9664    | 1         |
| cg12775656  | WDR86                                 | 0.00042036        | 0.000420357          | 4.36445            | 4.36445                      | T up vs N                              | 19.624  | 20.3356   | 16.5803    | 1         |
| cg12776966  | VSTM2B                                | 0.00022679        | 0.000226786          | 5.83479            | 5.83479                      | T up vs N                              | 22.367  | 29.1393   | 20.8444    | 1         |
| cg12778183  | TEX14;TEX14;RAD51C;TEX14;TEX14;RAD51C | 2.90E-06          | 2.90E-06             | 0.064586           | -15.4833                     | T down vs N                            | 49.265  | 70.3051   | 22.8335    | 1         |
| cg12779445  | MIR153-2;PTPRN2;PTPRN2;PTPRN2         | 1.27E-05          | 1.27E-05             | 3.16227            | 3.16227                      | T up vs N                              | 38.45   | 12.4145   | 5.16599    | 1         |
| cg12782180  | LEP                                   | 1.28E-05          | 1.28E-05             | 17.2021            | 17.2021                      | T up vs N                              | 38.376  | 75.8116   | 31.6077    | 1         |
| cg12785694  | SMC4;MIR15B;SMC4;MIR16-2              | 1.97E-05          | 1.97E-05             | 0.139705           | -7.15794                     | T down vs N                            | 35.607  | 36.2836   | 16.3041    | 1         |
| cg12793238  | HTR2B;PSMD1                           | 0.00019864        | 0.000198644          | 0.315563           | -3.16894                     | T down vs N                            | 22.985  | 12.4601   | 8.6736     | 1         |
| cg12793733  | ATP10D                                | 5.78E-05          | 5.78E-05             | 0.254979           | -3.92189                     | T down vs N                            | 29.272  | 17.4915   | 9.5608     | 1         |
| cg12795893  | ATP5B;SNORD59B                        | 0.00012786        | 0.000127864          | 0.272984           | -3.66322                     | T down vs N                            | 25.115  | 15.7885   | 10.0582    | 1         |
| cg12797522  | TDRG1                                 | 1.78E-05          | 1.78E-05             | 0.289676           | -3.45213                     | T down vs N                            | 36.242  | 14.378    | 6.34756    | 1         |
| cg12797594  | RBM9;RBM9;RBM9;RBM9;RBM9;RBM9         | 0.00258338        | 0.00258338           | 0.25567            | -3.91129                     | T down vs N                            | 12.709  | 17.4223   | 21.9335    | 1         |
| cg12798274  | MIR1307;USMG5                         | 4.08E-05          | 4.08E-05             | 0.109834           | -9.10467                     | T down vs N                            | 31.222  | 45.6951   | 23.4169    | 1         |
| cg12798859  | HCG18;HCG18                           | 0.00043092        | 0.000430916          | 0.327141           | -3.05679                     | T down vs N                            | 19.518  | 11.6937   | 9.58598    | 1         |
| cg12799818  | SLC47A1                               | 0.00014112        | 0.000141117          | 0.295478           | -3.38434                     | T down vs N                            | 24.628  | 13.9214   | 9.0443     | 1         |
| cg12801619  | FOXO3;FOXO3                           | 0.00416127        | 0.00416127           | 0.260311           | -3.84156                     | T down vs N                            | 11.15   | 16.9657   | 24.3454    | 1         |
| cg12802086  | MECR;MECR                             | 0.00080683        | 0.00080683           | 0.287402           | -3.47944                     | T down vs N                            | 16.952  | 14.5615   | 13.7439    | 1         |
| cg12802329  | RIOK3                                 | 0.0028771         | 0.0028771            | 0.301915           | -3.31219                     | T down vs N                            | 12.348  | 13.4336   | 17.4062    | 1         |
| cg12803053  | NSMCE2                                | 0.0002355         | 0.000235496          | 0.323468           | -3.0915                      | T down vs N                            | 22.193  | 11.9312   | 8.60168    | 1         |
| cg12806797  | H2AFJ;H2AFJ                           | 1.83E-05          | 1.83E-05             | 4.83872            | 4.83872                      | T up vs N                              | 36.076  | 23.2826   | 10.326     | 1         |
| cg12807330  | PCDH24                                | 9.83E-05          | 9.83E-05             | 0.256851           | -3.8933                      | T down vs N                            | 26.447  | 17.3048   | 10.469     | 1         |
| cg12808359  | WNK4                                  | 3.92E-05          | 3.92E-05             | 3.86299            | 3.86299                      | T up vs N                              | 31.46   | 17.1063   | 8.70002    | 1         |
| cg12808596  | ZP1                                   | 0.00087149        | 0.000871487          | 0.30948            | -3.23123                     | T down vs N                            | 16.651  | 12.8841   | 12.3808    | 1         |
| cg12810626  | LY9;LY9                               | 9.63E-05          | 9.63E-05             | 0.108756           | -9.19493                     | T down vs N                            | 26.55   | 46.1042   | 27.7839    | 1         |
| cg12813192  | C6                                    | 0.00169138        | 0.00169138           | 0.321225           | -3.11309                     | T down vs N                            | 14.179  | 12.0788   | 13.6298    | 1         |
| cg12815916  | PTPN18;PTPN18                         | 0.00698934        | 0.00698934           | 0.326635           | -3.06152                     | T down vs N                            | 9.5633  | 11.7261   | 19.6185    | 1         |
| cg12817782  | ANO1;ANO1                             | 0.00402146        | 0.00402146           | 0.223405           | -4.47617                     | T down vs N                            | 11.259  | 21.0393   | 29.8998    | 1         |
| cg12819826  | PPAN;PPAN-P2RY11                      | 0.00110573        | 0.00110573           | 0.325357           | -3.07355                     | T down vs N                            | 15.739  | 11.8084   | 12.0045    | 1         |
| cg12822074  | RTN4RL2                               | 2.04E-05          | 2.04E-05             | 7.61278            | 7.61278                      | T up vs N                              | 35.387  | 38.5905   | 17.4483    | 1         |
| cg12823512  | CMTM8                                 | 1.66E-05          | 1.66E-05             | 0.191232           | -5.22924                     | T down vs N                            | 36.719  | 25.6314   | 11.1688    | 1         |
| cg12827405  | C6orf218                              | 6.55E-06          | 6.55E-06             | 0.200275           | -4.99314                     | T down vs N                            | 43.049  | 24.2197   | 9.0017     | 1         |
| cg12827530  | RNU5E;RNU5D;CKMT2;CKMT2;CKMT2         | 8.59E-05          | 8.59E-05             | 6.34902            | 6.34902                      | T up vs N                              | 27.144  | 31.9968   | 18.8606    | 1         |
| cg12832726  | LRP5                                  | 0.00397993        | 0.00397993           | 0.28234            | -3.54182                     | T down vs N                            | 11.292  | 14.9795   | 21.2257    | 1         |
| cg12833018  | SCGB2A2                               | 2.55E-05          | 2.55E-05             | 0.279515           | -3.57762                     | T down vs N                            | 34.021  | 15.2187   | 7.15732    | 1         |

| Probeset ID | UCSC_REFGENE_NAME                  | p-value<br>(Type) | p-value (T vs.<br>N) | Ratio (T<br>vs. N) | Fold-<br>Change (T<br>vs. N) | Fold-Change (T vs.<br>N) (Description) | F(Type) | SS (Type) | SS (Error) | F (Error) |
|-------------|------------------------------------|-------------------|----------------------|--------------------|------------------------------|----------------------------------------|---------|-----------|------------|-----------|
| cg12833207  | STEAP4;STEAP4                      | 0.00016413        | 0.000164129          | 7.80061            | 7.80061                      | T up vs N                              | 23.893  | 39.5228   | 26.4664    | 1         |
| cg12837552  | RAI1                               | 0.00091081        | 0.000910805          | 0.235336           | -4.24924                     | T down vs N                            | 16.965  | 18.4507   | 16.3138    | 1         |
| cg12840248  | HLA-DMB;HLA-DMB                    | 2.53E-05          | 2.53E-05             | 0.218676           | -4.57297                     | T down vs N                            | 34.053  | 21.6442   | 10.1697    | 1         |
| cg12840312  | FAM50B                             | 0.00025352        | 0.000253524          | 3.70895            | 3.70895                      | T up vs N                              | 21.856  | 16.0917   | 11.7804    | 1         |
| cg12845215  | C6orf191                           | 0.00157386        | 0.00157386           | 0.259826           | -3.84873                     | T down vs N                            | 14.437  | 17.0128   | 18.8541    | 1         |
| cg12847125  | PTP4A3;PTP4A3                      | 0.00247696        | 0.00247696           | 0.112505           | -8.88848                     | T down vs N                            | 12.852  | 44.7062   | 55.6586    | 1         |
| cg12848808  | LBXCOR1                            | 0.00026579        | 0.000265789          | 6.46852            | 6.46852                      | T up vs N                              | 22.42   | 30.7253   | 20.5571    | 1         |
| cg12850636  | TJP3                               | 0.00030669        | 0.000306689          | 0.173362           | -5.76827                     | T down vs N                            | 20.998  | 28.7617   | 21.9155    | 1         |
| cg12854186  | TAP2;TAP2                          | 0.00032509        | 0.000325086          | 0.230322           | -4.34174                     | T down vs N                            | 20.74   | 20.1919   | 15.5771    | 1         |
| cg12855522  | CPNE5                              | 0.00191998        | 0.00191998           | 7.11991            | 7.11991                      | T up vs N                              | 13.731  | 36.0874   | 42.0518    | 1         |
| cg12858701  | TCF7L2;TCF7L2;TCF7L2;TCF7L2;TCF7L2 | 8.87E-06          | 8.87E-06             | 0.196388           | -5.09195                     | T down vs N                            | 40.9    | 24.8136   | 9.70704    | 1         |
| cg12858902  | GSTM5                              | 0.00069587        | 0.000695871          | 5.85507            | 5.85507                      | T up vs N                              | 17.539  | 29.2541   | 26.6877    | 1         |
| cg12860109  | NIPAL2                             | 9.02E-05          | 9.02E-05             | 0.305193           | -3.27661                     | T down vs N                            | 26.891  | 13.1924   | 7.84939    | 1         |
| cg12860254  | OR52D1                             | 0.00170009        | 0.00170009           | 0.290502           | -3.44231                     | T down vs N                            | 14.161  | 14.312    | 16.1707    | 1         |
| cg12861622  | BEYLA;BEYLA                        | 0.00030288        | 0.000302881          | 0.173362           | -3.57759                     | T down vs N                            | 21.797  | 14.3233   | 9.85701    | 1         |
| cg12861945  | C4orf39;TRIM61                     | 0.00306198        | 0.00306198           | 0.142281           | -7.02835                     | T down vs N                            | 12.762  | 31.6561   | 34.7278    | 1         |
| cg12862537  | BLCAP;BLCAP;BLCAP;BLCAP;NNAT;NN    | 0.00033966        | 0.000339663          | 3.74332            | 3.74332                      | T up vs N                              | 20.547  | 16.3189   | 12.7076    | 1         |
| cg12863967  | GNGT1                              | 8.57E-05          | 8.57E-05             | 0.247818           | -4.03521                     | T down vs N                            | 27.154  | 18.2283   | 10.7407    | 1         |
| cg12864221  | WBSCR17                            | 0.00050851        | 0.000508506          | 0.323344           | -3.09268                     | T down vs N                            | 18.82   | 11.9393   | 10.1501    | 1         |
| cg12864721  | C10orf41;C10orf41                  | 8.72E-05          | 8.72E-05             | 8.58187            | 8.58187                      | T up vs N                              | 27.064  | 43.2811   | 25.5879    | 1         |
| cg12867312  | BRAF                               | 0.00025943        | 0.000259427          | 0.248266           | -4.02794                     | T down vs N                            | 21.751  | 18.1812   | 13.3742    | 1         |
| cg12867448  | ODF2                               | 0.00208299        | 0.00208299           | 0.331061           | -3.02059                     | T down vs N                            | 13.446  | 11.4457   | 13.6195    | 1         |
| cg12868707  | GDAP1;GDAP1                        | 3.17E-05          | 3.17E-05             | 0.262401           | -3.81096                     | T down vs N                            | 32.706  | 16.7647   | 8.20149    | 1         |
| cg12873610  | AB34;RAB34;RAB34;RAB34;RAB34;R     | 0.00715363        | 0.00715363           | 4.88002            | 4.88002                      | T up vs N                              | 9.4948  | 23.5343   | 39.6584    | 1         |
| cg12873919  | BCL2L1;BCL2L1                      | 0.0048503         | 0.0048503            | 0.302827           | -3.30222                     | T down vs N                            | 10.67   | 13.366    | 20.0436    | 1         |
| cg12874219  | TM4SF4                             | 1.01E-05          | 1.01E-05             | 0.319204           | -3.13279                     | T down vs N                            | 40.017  | 12.2134   | 4.88327    | 1         |
| cg12881363  | MOV10L1;MOV10L1;MOV10L1            | 0.00083222        | 0.000832221          | 3.27183            | 3.27183                      | T up vs N                              | 16.83   | 13.1599   | 12.5107    | 1         |
| cg12892471  | LIMA1;LIMA1;LIMA1                  | 7.45E-06          | 7.45E-06             | 0.316244           | -3.16211                     | T down vs N                            | 42.127  | 12.4135   | 4.71468    | 1         |
| cg12898019  | ST6GALNAC1                         | 0.00062521        | 0.000625208          | 0.281657           | -3.55041                     | T down vs N                            | 17.97   | 15.0369   | 13.3882    | 1         |
| cg12899649  | HLA-DPB1;HLA-DPB1                  | 8.84E-06          | 8.84E-06             | 0.172688           | -5.79079                     | T down vs N                            | 40.922  | 28.8897   | 11.2956    | 1         |
| cg12904891  | KIAA0907                           | 0.00018715        | 0.000187146          | 0.215329           | -4.64405                     | T down vs N                            | 23.266  | 22.0857   | 15.1882    | 1         |
| cg12906108  | DNAH10                             | 0.00100421        | 0.00100421           | 0.109895           | -9.09958                     | T down vs N                            | 16.104  | 45.6719   | 45.3766    | 1         |
| cg12907644  | SAA2;SAA2                          | 0.00064459        | 0.000644586          | 0.320388           | -3.12122                     | T down vs N                            | 17.847  | 12.1344   | 10.8788    | 1         |
| cg12907969  | LYSMD3                             | 0.00036479        | 0.00036479           | 0.320134           | -3.12369                     | T down vs N                            | 20.235  | 12.1513   | 9.60809    | 1         |
| cg12910806  | CNST;TFB2M;CNST                    | 2.89E-06          | 2.89E-06             | 0.077266           | -12.9423                     | T down vs N                            | 49.29   | 61.406    | 19.9329    | 1         |
| cg12912293  | ARNT;ARNT;ARNT                     | 3.69E-05          | 3.69E-05             | 0.208564           | -4.79468                     | T down vs N                            | 31.808  | 23.0134   | 11.5762    | 1         |
| cg12912920  | MAML3                              | 7.94E-07          | 7.94E-07             | 0.211833           | -4.7207                      | T down vs N                            | 60.543  | 22.5591   | 5.96181    | 1         |
| cg12914954  | SESN1                              | 5.58E-06          | 5.58E-06             | 0.178986           | -5.58701                     | T down vs N                            | 44.23   | 27.7232   | 10.0289    | 1         |
| cg12918473  | WNT2;WNT2                          | 0.00332279        | 0.00332279           | 3.62781            | 3.62781                      | T up vs N                              | 11.874  | 15.5531   | 20.9582    | 1         |
| cg12920094  | RNF222;RNF222                      | 0.00032062        | 0.00032062           | 0.310099           | -3.22478                     | T down vs N                            | 20.801  | 12.8403   | 9.87655    | 1         |
| cg12921375  | CLIC1;CLIC1                        | 3.66E-05          | 3.66E-05             | 5.13017            | 5.13017                      | T up vs N                              | 33.352  | 23.5691   | 10.6       | 1         |
| cg12921481  | OR6N2                              | 1.51E-07          | 1.51E-07             | 0.099959           | -10.0041                     | T down vs N                            | 77.931  | 49.6761   | 10.199     | 1         |
| cg12927617  | ORM1                               | 2.37E-05          | 2.37E-05             | 0.222316           | -4.49811                     | T down vs N                            | 34.471  | 21.1767   | 9.82931    | 1         |
| cg12930338  | MS4A6E                             | 1.73E-05          | 1.73E-05             | 0.213867           | -4.6758                      | T down vs N                            | 36.423  | 22.8291   | 9.7881     | 1         |
| cg12930930  | ORS186                             | 1.67E-05          | 1.67E-05             | 0.180278           | -5.54699                     | T down vs N                            | 36.656  | 27.492    | 12         | 1         |
| cg12934258  | SYTL3                              | 9.62E-07          | 9.62E-07             | 0.143708           | -6.95857                     | T down vs N                            | 58.744  | 35.2495   | 9.60079    | 1         |
| cg12934788  | LOXHD1;LOXHD1;LOXHD1;LOXHD1        | 4.39E-08          | 4.39E-08             | 0.191045           | -5.23436                     | T down vs N                            | 93.452  | 25.6617   | 4.39357    | 1         |
| cg12935170  | IGF2BP3                            | 0.00021792        | 0.000217921          | 0.263183           | -3.79963                     | T down vs N                            | 22.552  | 16.6902   | 11.8413    | 1         |
| cg12939270  | GPX5;GPX5                          | 0.00012405        | 0.000124054          | 0.167475           | -5.97103                     | T down vs N                            | 25.266  | 29.9069   | 18.9389    | 1         |
| cg12939283  | HLA-DPB1                           | 0.00129171        | 0.00129171           | 0.299174           | -3.34253                     | T down vs N                            | 15.158  | 13.6389   | 14.3963    | 1         |
| cg12940040  | BTNL8;BTNL8;BTNL8;BTNL8;BTNL8;BT   | 8.69E-07          | 8.69E-07             | 0.267878           | -3.73304                     | T down vs N                            | 59.695  | 16.251    | 4.35577    | 1         |
| cg12942414  | EPCAM                              | 7.30E-06          | 7.30E-06             | 12.4111            | 12.4111                      | T up vs N                              | 42.268  | 59.4123   | 22.4895    | 1         |
| cg12942878  | MGC2889;HRASLS                     | 1.22E-05          | 1.22E-05             | 0.218123           | -4.58456                     | T down vs N                            | 38.742  | 21.7164   | 8.96856    | 1         |
| cg12948771  | LTB4R;LTB4R                        | 0.00024524        | 0.000245237          | 0.291819           | -3.42678                     | T down vs N                            | 22.007  | 14.2074   | 10.3293    | 1         |
| cg12954267  | HLA-DPB2                           | 1.87E-06          | 1.87E-06             | 0.292652           | -3.41702                     | T down vs N                            | 52.881  | 14.1417   | 4.27881    | 1         |
| cg12955127  | WDR77;ATP5F1                       | 0.00014903        | 0.000149032          | 0.308933           | -3.23694                     | T down vs N                            | 24.361  | 12.923    | 8.48772    | 1         |
| cg12955216  | AEBP1                              | 1.19E-05          | 1.19E-05             | 0.269116           | -3.71588                     | T down vs N                            | 38.882  | 16.1375   | 6.64054    | 1         |
| cg12955441  | CCDC68;CCDC68                      | 7.44E-06          | 7.44E-06             | 9.10137            | 9.10137                      | T up vs N                              | 42.138  | 45.6801   | 17.345     | 1         |
| cg12958642  | VPS52                              | 1.20E-05          | 1.20E-05             | 0.260616           | -3.83706                     | T down vs N                            | 38.811  | 16.9362   | 6.98203    | 1         |
| cg12960696  | SH3TC2                             | 0.000276          | 0.000276001          | 0.245356           | -4.07572                     | T down vs N                            | 21.47   | 18.4903   | 13.7791    | 1         |
| cg12960970  | HCRTR2                             | 0.00026595        | 0.000265946          | 0.279144           | -3.58237                     | T down vs N                            | 21.638  | 15.2504   | 11.2767    | 1         |
| cg12961607  | SFRS7                              | 0.00024448        | 0.000244479          | 0.244664           | -4.08723                     | T down vs N                            | 22.021  | 18.5646   | 13.4884    | 1         |
| cg12962542  | MECOM                              | 2.65E-05          | 2.65E-05             | 0.130848           | -7.64244                     | T down vs N                            | 33.769  | 38.7385   | 18.3548    | 1         |
| cg12964647  | MIR1203;SKAP1;SKAP1                | 7.81E-06          | 7.81E-06             | 0.097589           | -10.2471                     | T down vs N                            | 41.797  | 50.7168   | 19.4146    | 1         |
| cg12966367  | RASSF1;RASSF1                      | 8.05E-05          | 8.05E-05             | 6.68295            | 6.68295                      | T up vs N                              | 27.482  | 33.7961   | 19.6762    | 1         |
| cg12966778  | EMR2;EMR2;EMR2;EMR2;EMR2;EMR2;EMR2 | 0.00025145        | 0.000251448          | 0.327406           | -3.05432                     | T down vs N                            | 21.893  | 11.6768   | 8.5337     | 1         |

| Probeset ID                                                    | UCSC_REFGENE_NAME       | p-value<br>(Type) | p-value (T vs.<br>N) | Ratio (T<br>vs. N) | Fold-<br>Change (T<br>vs. N) | Fold-Change (T vs.<br>N) (Description) | F(Type) | SS (Type) | SS (Error) | F (Error) |
|----------------------------------------------------------------|-------------------------|-------------------|----------------------|--------------------|------------------------------|----------------------------------------|---------|-----------|------------|-----------|
| cg12967044                                                     | KLB                     | 5.03E-05          | 5.03E-05             | 0.220863           | -4.52769                     | T down vs N                            | 30.042  | 21.3618   | 11.3771    | 1         |
| cg12968224                                                     | EEFSEC                  | 0.00036266        | 0.000362663          | 0.259629           | -3.85165                     | T down vs N                            | 20.261  | 17.0319   | 13.4503    | 1         |
| cg12968701                                                     | MARS                    | 8.65E-06          | 8.65E-06             | 0.24278            | -4.11896                     | T down vs N                            | 41.07   | 18.7691   | 7.312      | 1         |
| cg12969193                                                     | HOXD9                   | 0.005758          | 0.005758             | 5.49351            | 5.49351                      | T up vs N                              | 10.143  | 27.1819   | 42.8765    | 1         |
| cg12972064                                                     | FNDC3B;FNDC3B           | 0.00145011        | 0.00145011           | 0.323748           | -3.08882                     | T down vs N                            | 14.734  | 11.9129   | 12.9365    | 1         |
| cg12973315                                                     | GPR78                   | 8.53E-05          | 8.53E-05             | 0.296203           | -3.37606                     | T down vs N                            | 27.184  | 13.8655   | 8.16111    | 1         |
| cg12974637                                                     | CCDC68;CCDC68;CCDC68    | 5.25E-06          | 5.25E-06             | 17.5318            | 17.5318                      | T up vs N                              | 44.681  | 76.8268   | 27.5115    | 1         |
| cg12974832                                                     | SNB1                    | 7.93E-05          | 7.93E-05             | 0.209727           | -4.7681                      | T down vs N                            | 27.562  | 22.8504   | 13.2647    | 1         |
| cg12976832                                                     | ZNF317                  | 6.85E-06          | 6.85E-06             | 0.244418           | -4.09134                     | T down vs N                            | 42.726  | 18.5911   | 6.96194    | 1         |
| cg12978205                                                     | CA5B                    | 0.00097466        | 0.000974663          | 4.6741             | 4.6741                       | T up vs N                              | 16.218  | 22.2716   | 21.9717    | 1         |
| cg12980549                                                     | PTPRN2;PTPRN2;PTPRN2    | 0.00026318        | 0.000263176          | 0.280288           | -3.56775                     | T down vs N                            | 21.686  | 15.1528   | 11.18      | 1         |
| cg12983089                                                     | OR2AT4                  | 5.79E-06          | 5.79E-06             | 0.205673           | -4.86209                     | T down vs N                            | 43.953  | 23.4252   | 8.52744    | 1         |
| cg12984636                                                     | OR13D1                  | 3.92E-05          | 3.92E-05             | 0.174611           | -5.72701                     | T down vs N                            | 31.455  | 28.5265   | 14.5103    | 1         |
| cg12985770                                                     | HLA-B                   | 9.50E-05          | 9.50E-05             | 4.3191             | 4.3191                       | T up vs N                              | 29.074  | 17.8208   | 8.58136    | 1         |
| cg12986110                                                     | PLA2G4C;PLA2G4C;PLA2G4C | 0.00012873        | 0.000128732          | 0.202454           | -4.93938                     | T down vs N                            | 25.082  | 23.8947   | 15.2428    | 1         |
| cg12987059                                                     | GLB1;GLB1;GLB1          | 4.25E-05          | 4.25E-05             | 0.251891           | -10.2069                     | T down vs N                            | 30.993  | 50.5459   | 26.0943    | 1         |
| cg12988813                                                     | JAZF1                   | 9.32E-06          | 9.32E-06             | 0.179889           | -5.55898                     | T down vs N                            | 40.556  | 27.5613   | 10.8735    | 1         |
| cg12989719                                                     | MICB                    | 9.79E-05          | 9.79E-05             | 0.263868           | -3.78977                     | T down vs N                            | 26.466  | 16.6253   | 10.0508    | 1         |
| cg12989934                                                     | KCNIP1;KCNIP1;KCNIP1    | 0.00559791        | 0.00559791           | 4.03297            | 4.03297                      | T up vs N                              | 10.229  | 18.2138   | 28.4897    | 1         |
| cg12991125                                                     | PLA2R1;PLA2R1           | 7.47E-05          | 7.47E-05             | 17.726             | 17.726                       | T up vs N                              | 27.884  | 77.419    | 44.4235    | 1         |
| cg12999098                                                     | RBM4B                   | 2.16E-06          | 2.16E-06             | 0.290283           | -3.44492                     | T down vs N                            | 51.651  | 14.3295   | 4.43888    | 1         |
| cg12999291                                                     | CCHCR1;CCHCR1;CCHCR1    | 0.00078961        | 0.000789608          | 0.272576           | -3.6687                      | T down vs N                            | 17.037  | 15.8249   | 14.8619    | 1         |
| cg13002493                                                     | KRT19                   | 0.00015857        | 0.000158565          | 13.4693            | 13.4693                      | T up vs N                              | 24.06   | 63.3355   | 42.1189    | 1         |
| cg13005228                                                     | LOC340074               | 0.00098531        | 0.000985311          | 0.251891           | -3.96997                     | T down vs N                            | 16.177  | 17.8049   | 17.6103    | 1         |
| cg13008879                                                     | SUPT16H                 | 0.00071618        | 0.000716179          | 0.278333           | -3.59282                     | T down vs N                            | 17.424  | 15.32     | 14.0683    | 1         |
| cg13011928                                                     | TFAP2A;TFAP2A;TFAP2A    | 6.09E-05          | 6.09E-05             | 0.312171           | -3.20337                     | T down vs N                            | 28.98   | 12.6946   | 7.00878    | 1         |
| cg13014394                                                     | PSMB5;PSMB5;PSMB5       | 0.0025277         | 0.0025277            | 0.267159           | -3.74309                     | T down vs N                            | 12.783  | 16.3174   | 20.4241    | 1         |
| cg13014558                                                     | CD6                     | 0.00011759        | 0.000117589          | 0.280669           | -3.56292                     | T down vs N                            | 25.534  | 15.1205   | 9.47471    | 1         |
| cg13016045                                                     | GRPR                    | 0.00156383        | 0.00156383           | 0.332537           | -3.00718                     | T down vs N                            | 14.461  | 11.3537   | 12.5625    | 1         |
| cg13018120                                                     | CD300E                  | 2.72E-07          | 2.72E-07             | 0.093955           | -10.6434                     | T down vs N                            | 71.355  | 52.3842   | 11.7462    | 1         |
| cg13021015                                                     | MECOM                   | 8.36E-05          | 8.36E-05             | 0.212278           | -4.7108                      | T down vs N                            | 27.284  | 22.4981   | 13.1936    | 1         |
| cg13021479                                                     | MYH10                   | 0.00159997        | 0.00159997           | 7.45018            | 7.45018                      | T up vs N                              | 14.378  | 37.7739   | 42.0345    | 1         |
| PCDHA2;PCDHA1;PCDHA1;PCDHA6;PCDHA5;PCDHA6;PCDHA3;PCDHA4;PCDHA6 |                         |                   |                      |                    |                              |                                        |         |           |            |           |
| cg13022679                                                     | HA6                     | 0.00565025        | 0.00565025           | 3.96758            | 3.96758                      | T up vs N                              | 10.201  | 17.7893   | 27.9029    | 1         |
| cg13023210                                                     | PAX6;PAX6;PAX6          | 0.00110774        | 0.00110774           | 4.72979            | 4.72979                      | T up vs N                              | 15.732  | 22.615    | 23.0006    | 1         |
| cg13031740                                                     | OR8U1;OR8U8             | 0.00026176        | 0.000261758          | 0.203725           | -4.90858                     | T down vs N                            | 21.71   | 23.7079   | 17.4724    | 1         |
| cg13032702                                                     | ITPR1P2;ITPR1P2         | 0.00121693        | 0.00121693           | 0.290718           | -3.43975                     | T down vs N                            | 15.38   | 14.2948   | 14.8715    | 1         |
| cg13033338                                                     | OPCML                   | 0.00386246        | 0.00386246           | 5.33785            | 5.33785                      | T up vs N                              | 11.387  | 26.2724   | 36.9148    | 1         |
| cg13033938                                                     | IP6K1;IP6K1             | 3.60E-05          | 3.60E-05             | 0.296504           | -3.37263                     | T down vs N                            | 31.953  | 13.8423   | 6.93142    | 1         |
| cg13034654                                                     | CENPK;PPWD1;PPWD1       | 0.0047749         | 0.0047749            | 3.56346            | 3.56346                      | T up vs N                              | 12.41   | 10.8583   | 9.62456    | 1         |
| cg13035254                                                     | CYP1A1                  | 7.88E-05          | 7.88E-05             | 0.237241           | -4.21513                     | T down vs N                            | 27.595  | 19.3861   | 11.2404    | 1         |
| SLC26A5;SLC26A5;SLC26A5;SLC26A5;S                              |                         |                   |                      |                    |                              |                                        |         |           |            |           |
| cg13035268                                                     | LC26A5                  | 0.00033836        | 0.000338359          | 3.84646            | 3.84646                      | T up vs N                              | 20.564  | 16.9979   | 13.2255    | 1         |
| cg13036352                                                     | KIAA1949;KIAA1949       | 5.04E-06          | 5.04E-06             | 0.260163           | -3.84375                     | T down vs N                            | 44.979  | 16.9801   | 6.04015    | 1         |
| cg13036546                                                     | HLA-E                   | 9.62E-05          | 9.62E-05             | 0.3228             | -3.09789                     | T down vs N                            | 26.554  | 11.975    | 7.21542    | 1         |
| cg13039199                                                     | SLCO3A1;SLCO3A1         | 1.16E-06          | 1.16E-06             | 0.285775           | -3.49925                     | T down vs N                            | 57.076  | 14.6944   | 4.11924    | 1         |
| cg13039251                                                     | PZD2                    | 1.92E-05          | 1.92E-05             | 0.26888            | -3.71913                     | T down vs N                            | 35.778  | 16.159    | 7.22646    | 1         |
| cg13039539                                                     | AUTS2;AUTS2             | 2.20E-05          | 2.20E-05             | 0.161387           | -6.1963                      | T down vs N                            | 34.91   | 31.1593   | 14.2808    | 1         |
| cg13040886                                                     | BCL2L10                 | 0.00016506        | 0.000165055          | 3.89767            | 3.89767                      | T up vs N                              | 23.866  | 17.3333   | 11.6204    | 1         |
| cg13041637                                                     | OR6X1                   | 3.16E-05          | 3.16E-05             | 0.222609           | -4.49219                     | T down vs N                            | 32.717  | 21.1396   | 10.3383    | 1         |
| cg13043509                                                     | GIMAP5;GIMAP5           | 1.60E-05          | 1.60E-05             | 0.240793           | -4.15294                     | T down vs N                            | 36.93   | 18.9876   | 8.22651    | 1         |
| cg13044277                                                     | NRG4                    | 1.31E-06          | 1.31E-06             | 0.122209           | -8.18273                     | T down vs N                            | 59.768  | 38.9501   | 9.77528    | 1         |
| cg13044675                                                     | LTBP3;LTBP3;LTBP3       | 0.00061528        | 0.00061528           | 7.21106            | 7.21106                      | T up vs N                              | 18.035  | 36.5567   | 32.4311    | 1         |
| cg13047306                                                     | KRTAP1-3;KRTAP1-3       | 0.00063145        | 0.000631452          | 0.214202           | -4.66849                     | T down vs N                            | 17.93   | 22.2369   | 19.8433    | 1         |
| cg13049261                                                     | SETD3;SETD3             | 7.88E-06          | 7.88E-06             | 0.301004           | -3.32222                     | T down vs N                            | 41.727  | 13.5015   | 5.1771     | 1         |
| cg13049398                                                     | ZNF516                  | 2.61E-06          | 2.61E-06             | 0.164799           | -6.068                       | T down vs N                            | 50.119  | 30.4486   | 9.72042    | 1         |
| cg13053563                                                     | OR2T1                   | 0.00109807        | 0.00109807           | 0.200425           | -4.9894                      | T down vs N                            | 15.765  | 24.1972   | 24.558     | 1         |
| cg13054881                                                     | ADAM6                   | 9.96E-07          | 9.96E-07             | 0.332523           | -3.00731                     | T down vs N                            | 58.428  | 11.3546   | 3.10935    | 1         |
| cg13058453                                                     | WDR63                   | 5.08E-06          | 5.08E-06             | 0.240731           | -4.15401                     | T down vs N                            | 44.913  | 18.9945   | 6.76662    | 1         |
| cg13060114                                                     | TFAP2E                  | 0.00174186        | 0.00174186           | 0.308023           | -3.24651                     | T down vs N                            | 14.075  | 12.988    | 14.7649    | 1         |
| cg13060154                                                     | DAB2IP                  | 1.64E-05          | 1.64E-05             | 0.293816           | -3.40349                     | T down vs N                            | 36.762  | 14.0506   | 6.11521    | 1         |
| cg13062913                                                     | NCAM2                   | 0.00010987        | 0.000109866          | 5.81938            | 5.81938                      | T up vs N                              | 25.877  | 29.052    | 17.9631    | 1         |
| cg13065228                                                     | FOXH1;FOXH1             | 0.0004631         | 0.0004631            | 4.99948            | 4.99948                      | T up vs N                              | 19.213  | 24.2579   | 20.2016    | 1         |
| cg13066693                                                     | ESRRB                   | 0.00019429        | 0.00019429           | 0.246674           | -4.05394                     | T down vs N                            | 23.089  | 18.3495   | 12.7156    | 1         |
| cg13068215                                                     | FMN2                    | 0.00496861        | 0.00496861           | 0.322122           | -3.10442                     | T down vs N                            | 10.595  | 12.0195   | 18.1514    | 1         |
| cg13072508                                                     | REN                     | 2.81E-05          | 2.81E-05             | 0.312164           | -3.20345                     | T down vs N                            | 33.419  | 12.6951   | 6.0781     | 1         |
| cg13075942                                                     | RAD51L1                 | 2.48E-05          | 2.48E-05             | 0.247536           | -4.03981                     | T down vs N                            | 34.168  | 18.2581   | 8.54975    | 1         |
| cg13077031                                                     | JARID2                  | 0.00032445        | 0.000324447          | 3.1821             | 3.1821                       | T up vs N                              | 20.749  | 12.5497   | 9.67745    | 1         |
| cg13077545                                                     | SOST                    | 4.11E-05          | 4.11E-05             | 7.3446             | 7.3446                       | T up vs N                              | 31.185  | 37.2389   | 19.1061    | 1         |
| cg13078567                                                     | ESRP1;ESRP1;ESRP1;ESRP1 | 0.00357839        | 0.00357839           | 0.293404           | -3.40827                     | T down vs N                            | 11.633  | 14.0827   | 19.3695    | 1         |
| cg13081213                                                     | SKAP2                   | 0.00013581        | 0.000135805          | 0.20478            | -4.88328                     | T down vs N                            | 24.817  | 23.5542   | 15.1859    | 1         |

| Probeset ID | UCSC_REFGENE_NAME               | p-value<br>(Type) | p-value (T vs.<br>N) | Ratio (T<br>vs. N) | Fold-<br>Change (T<br>vs. N) | Fold-Change (T vs.<br>N) (Description) | F(Type) | SS (Type) | SS (Error) | F (Error) |
|-------------|---------------------------------|-------------------|----------------------|--------------------|------------------------------|----------------------------------------|---------|-----------|------------|-----------|
| cg13084458  | INTU                            | 7.00E-06          | 7.00E-06             | 0.321314           | -3.11222                     | T down vs N                            | 42.57   | 12.0729   | 4.53766    | 1         |
| cg13084994  | LOC643677                       | 0.00011566        | 0.000115658          | 0.283426           | -3.52826                     | T down vs N                            | 25.617  | 14.8887   | 9.29911    | 1         |
| cg13089044  | NOTCH4                          | 1.00E-06          | 1.00E-06             | 0.262263           | -3.81296                     | T down vs N                            | 58.39   | 16.7779   | 4.59747    | 1         |
| cg13090671  | HCP5                            | 0.00127608        | 0.00127608           | 3.63418            | 3.63418                      | T up vs N                              | 15.203  | 15.5955   | 16.4128    | 1         |
| cg13096809  | NOTCH4                          | 8.50E-06          | 8.50E-06             | 0.193699           | -5.16264                     | T down vs N                            | 41.2    | 25.2358   | 9.80025    | 1         |
| cg13096820  | EFNA3                           | 0.00154906        | 0.00154906           | 13.9109            | 13.9109                      | T up vs N                              | 14.495  | 64.9166   | 71.6583    | 1         |
| cg13097816  | GPR35                           | 0.00021832        | 0.000218315          | 0.269347           | -3.71268                     | T down vs N                            | 22.544  | 16.1163   | 11.4384    | 1         |
| cg13099374  | POU2F1                          | 0.00081286        | 0.000812858          | 0.243148           | -4.11272                     | T down vs N                            | 16.923  | 18.7289   | 17.7079    | 1         |
| cg13100118  | CAPZB                           | 0.00022158        | 0.000221579          | 0.200077           | -4.99808                     | T down vs N                            | 22.475  | 24.2495   | 17.2635    | 1         |
| cg13101072  | FAM50B                          | 0.00043518        | 0.000435175          | 3.00547            | 3.00547                      | T up vs N                              | 19.476  | 11.342    | 9.31764    | 1         |
| cg13102120  | CRADD                           | 0.00097852        | 0.000978522          | 0.280373           | -3.56667                     | T down vs N                            | 16.203  | 15.1455   | 14.9555    | 1         |
| cg13102658  | MORN1;RER1                      | 0.00011095        | 0.000110945          | 0.233723           | -4.27858                     | T down vs N                            | 25.828  | 19.7908   | 12.2603    | 1         |
| cg13104385  | IL6                             | 9.83E-05          | 9.83E-05             | 0.28273            | -3.53695                     | T down vs N                            | 26.444  | 14.9468   | 9.04368    | 1         |
| cg13107973  | KCNK2                           | 9.25E-05          | 9.25E-05             | 0.227              | -4.40529                     | T down vs N                            | 26.759  | 20.5935   | 12.3134    | 1         |
| cg13115683  | HCG9                            | 6.02E-06          | 6.02E-06             | 32.281             | 32.281                       | T up vs N                              | 43.667  | 113.068   | 41.4292    | 1         |
| cg13117439  | psiTPTE22                       | 2.97E-05          | 2.97E-05             | 0.178935           | -5.58863                     | T down vs N                            | 33.082  | 27.7325   | 13.4126    | 1         |
| cg13120174  | SCAND3                          | 0.00485693        | 0.00485693           | 0.283603           | -3.52606                     | T down vs N                            | 10.665  | 14.874    | 22.3137    | 1         |
| cg13124801  | SPNS2                           | 9.44E-05          | 9.44E-05             | 3.53203            | 3.53203                      | T up vs N                              | 26.652  | 14.9139   | 8.95318    | 1         |
| cg13124863  | SCARA5;SCARA5                   | 0.0014639         | 0.0014639            | 0.244073           | -4.09713                     | T down vs N                            | 14.7    | 18.6284   | 20.2765    | 1         |
| cg13133304  | TNNI2;TNNI2;TNNI2               | 1.63E-05          | 1.63E-05             | 0.196581           | -5.08696                     | T down vs N                            | 36.801  | 24.7837   | 10.7753    | 1         |
| cg13133961  | ETV7                            | 4.74E-05          | 4.74E-05             | 84.1249            | 84.1249                      | T up vs N                              | 31.765  | 173.177   | 81.7771    | 1         |
| cg13134650  | CH13L1                          | 9.46E-05          | 9.46E-05             | 0.197184           | -5.07141                     | T down vs N                            | 26.645  | 24.6905   | 14.8264    | 1         |
| cg13135459  | LOC387646                       | 1.13E-07          | 1.13E-07             | 3.97736            | 3.97736                      | T up vs N                              | 81.373  | 17.8529   | 3.51036    | 1         |
| cg13136556  | NCRNA00162                      | 1.73E-05          | 1.73E-05             | 0.321344           | -3.11193                     | T down vs N                            | 36.449  | 12.0709   | 5.29871    | 1         |
| cg13136933  | LOC283663                       | 0.00033696        | 0.000336959          | 0.288155           | -3.47036                     | T down vs N                            | 20.582  | 14.5005   | 11.2723    | 1         |
| cg13137809  | GNA12                           | 0.0063161         | 0.0063161            | 0.262721           | -3.80631                     | T down vs N                            | 9.8646  | 16.7342   | 27.1423    | 1         |
| cg13138552  | HMG2A;HMG2A                     | 8.14E-07          | 8.14E-07             | 0.276404           | -3.6179                      | T down vs N                            | 60.298  | 15.4872   | 4.10948    | 1         |
| cg13138832  | BTNL2                           | 7.10E-05          | 7.10E-05             | 0.238877           | -4.18625                     | T down vs N                            | 28.15   | 19.2012   | 10.9138    | 1         |
| cg13142612  | U2AF1;U2AF1;U2AF1               | 0.00023376        | 0.000233759          | 0.31282            | -3.19673                     | T down vs N                            | 22.227  | 12.6494   | 9.10547    | 1         |
| cg13144059  | SPATS2L;SPATS2L;SPATS2L;SPATS2L | 0.00074676        | 0.000746755          | 0.228284           | -4.38051                     | T down vs N                            | 17.257  | 20.4371   | 18.9481    | 1         |
| cg13144143  | SYNE2;SYNE2                     | 0.00047166        | 0.000471664          | 0.299077           | -3.34362                     | T down vs N                            | 19.135  | 13.6463   | 11.4103    | 1         |
| cg13145644  | CX3CR1                          | 0.00040195        | 0.00040195           | 0.272804           | -3.66563                     | T down vs N                            | 19.816  | 15.8045   | 12.7612    | 1         |
| cg13151472  | DEFB132                         | 0.00013187        | 0.000131869          | 0.302902           | -3.3014                      | T down vs N                            | 24.962  | 13.3605   | 8.56363    | 1         |
| cg13155490  | AQP12B                          | 0.00019639        | 0.000196386          | 0.324804           | -3.07878                     | T down vs N                            | 23.039  | 11.8442   | 8.22567    | 1         |
| cg13158604  | EMID2                           | 0.00114199        | 0.00114199           | 0.28851            | -3.46608                     | T down vs N                            | 15.617  | 14.4718   | 14.8265    | 1         |
| cg13158894  | CCDC144C                        | 6.51E-06          | 6.51E-06             | 29.1021            | 29.1021                      | T up vs N                              | 43.093  | 106.422   | 39.5132    | 1         |
| cg13161025  | LOC84856                        | 4.61E-05          | 4.61E-05             | 0.221219           | -4.52041                     | T down vs N                            | 30.53   | 21.3163   | 11.1712    | 1         |
| cg13163521  | LTK;LTK;LTK                     | 8.59E-05          | 8.59E-05             | 4.80749            | 4.80749                      | T up vs N                              | 27.141  | 23.0918   | 13.6128    | 1         |
| cg13168221  | C1QA                            | 1.79E-07          | 1.79E-07             | 0.119915           | -8.33927                     | T down vs N                            | 75.968  | 42.134    | 8.87412    | 1         |
| cg13169065  | GALNT3                          | 0.00069863        | 0.000698626          | 5.15082            | 5.15082                      | T up vs N                              | 17.523  | 25.1653   | 22.9784    | 1         |
| cg13169491  | FAM71F1                         | 6.93E-05          | 6.93E-05             | 0.265445           | -3.76726                     | T down vs N                            | 28.281  | 16.4769   | 9.32191    | 1         |
| cg13173045  | OR8H2                           | 1.00E-08          | 1.00E-08             | 0.106524           | -9.38753                     | T down vs N                            | 115.45  | 46.9697   | 6.50947    | 1         |
| cg13173111  | ARSG                            | 0.00060394        | 0.000603937          | 0.299191           | -3.34234                     | T down vs N                            | 18.111  | 13.6377   | 12.048     | 1         |
| cg13173286  | BARX2                           | 0.00034994        | 0.000349938          | 0.304904           | -3.27972                     | T down vs N                            | 20.416  | 13.2135   | 10.3552    | 1         |
| cg13174660  | VAX2                            | 1.02E-05          | 1.02E-05             | 0.155037           | -6.45007                     | T down vs N                            | 39.906  | 32.5459   | 13.049     | 1         |
| cg13176979  | HMG3;HMG3                       | 4.46E-06          | 4.46E-06             | 3.86696            | 3.86696                      | T up vs N                              | 45.906  | 17.1323   | 5.97129    | 1         |
| cg13184710  | WNT10A                          | 0.00234566        | 0.00234566           | 10.0259            | 10.0259                      | T up vs N                              | 13.037  | 49.7699   | 61.0812    | 1         |
| cg13185413  | RNF39;RNF39                     | 0.00014643        | 0.00014643           | 7.84056            | 7.84056                      | T up vs N                              | 24.447  | 39.7196   | 25.9957    | 1         |
| cg13187349  | HOXB3                           | 1.58E-05          | 1.58E-05             | 6.42616            | 6.42616                      | T up vs N                              | 37.006  | 32.4163   | 14.0155    | 1         |
| cg13187657  | ZNF280C                         | 0.00027979        | 0.00027979           | 0.279432           | -3.57868                     | T down vs N                            | 21.409  | 15.2257   | 11.379     | 1         |
| cg13188519  | C14orf156                       | 0.00013793        | 0.000137931          | 0.273577           | -3.65528                     | T down vs N                            | 24.74   | 15.7357   | 10.1766    | 1         |
| cg13188795  | MKI67;MKI67                     | 0.00026955        | 0.000269552          | 0.237051           | -4.2185                      | T down vs N                            | 21.577  | 19.4076   | 14.3912    | 1         |
| cg13195526  | IL22                            | 0.00241361        | 0.00241361           | 0.301736           | -3.31415                     | T down vs N                            | 12.94   | 13.4469   | 16.6273    | 1         |
| cg13199127  | TNXB                            | 0.00272299        | 0.00272299           | 0.257276           | -3.88687                     | T down vs N                            | 12.532  | 17.2627   | 22.0395    | 1         |
| cg13200550  | RPSAP52;HMG2A;HMG2A             | 1.64E-05          | 1.64E-05             | 0.227158           | -4.40222                     | T down vs N                            | 36.772  | 20.5742   | 8.95216    | 1         |
| cg13201322  | MAGEB1;MAGEB1;MAGEB4            | 3.71E-05          | 3.71E-05             | 0.282202           | -3.54357                     | T down vs N                            | 31.781  | 14.9911   | 7.54719    | 1         |
| cg13202213  | CAMTA1                          | 2.60E-05          | 2.60E-05             | 0.23989            | -4.16858                     | T down vs N                            | 33.882  | 19.088    | 9.01393    | 1         |
| cg13206706  | RPL5;SNORD21                    | 4.56E-05          | 4.56E-05             | 0.27762            | -3.60205                     | T down vs N                            | 30.597  | 15.3816   | 8.04354    | 1         |
| cg13207467  | CSR1;CSR1                       | 0.00040418        | 0.000404184          | 4.46674            | 4.46674                      | T up vs N                              | 19.792  | 20.9801   | 16.9606    | 1         |
| cg13208003  | LHFP                            | 5.24E-05          | 5.24E-05             | 0.301237           | -3.31965                     | T down vs N                            | 29.816  | 13.4841   | 7.2358     | 1         |
| cg13210578  | TRAPPC9;TRAPPC9                 | 0.00288582        | 0.00288582           | 4.32406            | 4.32406                      | T up vs N                              | 12.338  | 20.0798   | 26.0391    | 1         |
| cg13211559  | PLA2G2A;PLA2G2A;PLA2G2A         | 3.96E-05          | 3.96E-05             | 0.239805           | -4.17006                     | T down vs N                            | 31.405  | 19.0974   | 9.72976    | 1         |
| cg13213009  | LY96                            | 0.00099222        | 0.000992218          | 0.271801           | -3.67916                     | T down vs N                            | 16.15   | 15.8943   | 15.7466    | 1         |
| cg13213810  | SHANK3                          | 0.00019649        | 0.000196494          | 7.72522            | 7.72522                      | T up vs N                              | 23.036  | 39.15     | 27.1922    | 1         |
| cg13213923  | MARCH10;MARCH10;MARCH10         | 0.00067546        | 0.000675464          | 4.43743            | 4.43743                      | T up vs N                              | 17.658  | 20.7959   | 18.8433    | 1         |
| cg13216112  | NRBF2                           | 9.66E-07          | 9.66E-07             | 0.103641           | -9.64869                     | T down vs N                            | 58.713  | 48.1279   | 13.1154    | 1         |
| cg13218710  | SHROOM1                         | 1.66E-05          | 1.66E-05             | 3.32573            | 3.32573                      | T up vs N                              | 36.708  | 13.5253   | 5.89527    | 1         |
| cg13221458  | SOD2;SOD2;SOD2                  | 0.00010985        | 0.000109853          | 0.32888            | -3.04062                     | T down vs N                            | 25.878  | 11.583    | 7.16169    | 1         |
| cg13221924  | KIAA0753                        | 1.88E-05          | 1.88E-05             | 0.198045           | -5.04937                     | T down vs N                            | 35.915  | 24.5582   | 10.9406    | 1         |
| cg13229857  | NR5A2;NR5A2                     | 0.00011505        | 0.000115053          | 0.27208            | -3.67539                     | T down vs N                            | 25.644  | 15.8693   | 9.90134    | 1         |
| cg13234110  | COG2;COG2                       | 0.00081093        | 0.000810932          | 6.49927            | 6.49927                      | T up vs N                              | 16.932  | 32.8117   | 31.0059    | 1         |

| Probeset ID                                                      | UCSC_REFGENE_NAME             | p-value<br>(Type) | p-value (T vs.<br>N) | Ratio (T<br>vs. N) | Fold-<br>Change (T<br>vs. N) | Fold-Change (T vs.<br>N) (Description) | F(Type) | SS (Type) | SS (Error) | F (Error) |
|------------------------------------------------------------------|-------------------------------|-------------------|----------------------|--------------------|------------------------------|----------------------------------------|---------|-----------|------------|-----------|
| cg13235059                                                       | TM4SF4                        | 0.00054506        | 0.000545058          | 0.291389           | -3.43184                     | T down vs N                            | 18.532  | 14.2415   | 12.2956    | 1         |
| cg13237265                                                       | DCN;DCN;DCN;DCN;DCN           | 0.00053808        | 0.000538078          | 0.250196           | -3.99687                     | T down vs N                            | 18.586  | 17.9796   | 15.4784    | 1         |
| cg13238909                                                       | CPLX4                         | 2.76E-05          | 2.76E-05             | 0.20395            | -4.90317                     | T down vs N                            | 33.527  | 23.6751   | 11.2984    | 1         |
| cg13240116                                                       | HOXA3;HOXA3;HOXA3             | 0.00139929        | 0.00139929           | 3.7073             | 3.7073                       | T up vs N                              | 14.864  | 16.0807   | 17.3095    | 1         |
| cg13240962                                                       | USH2A;USH2A                   | 0.00011247        | 0.000112465          | 0.175777           | -5.68901                     | T down vs N                            | 25.759  | 28.3093   | 17.5844    | 1         |
| cg13244293                                                       | NGLY1;OXSM;OXSM;OXSM          | 6.67E-06          | 6.67E-06             | 0.285273           | -3.50542                     | T down vs N                            | 42.924  | 14.7357   | 5.49273    | 1         |
| cg13244522                                                       | HHLA3;HHLA3;HHLA3;HHLA3       | 0.00720829        | 0.00720829           | 0.3313             | -3.01841                     | T down vs N                            | 9.4724  | 11.4307   | 19.3078    | 1         |
| cg13245539                                                       | MIR33B;SREBF1;SREBF1          | 7.89E-05          | 7.89E-05             | 3.25396            | 3.25396                      | T up vs N                              | 27.588  | 13.0387   | 7.56184    | 1         |
| cg13246026                                                       | TAS1R3                        | 0.00015454        | 0.000154543          | 0.286738           | -3.48751                     | T down vs N                            | 24.184  | 14.6156   | 9.66952    | 1         |
| cg13247581                                                       | ENTPD2;ENTPD2                 | 8.88E-05          | 8.88E-05             | 68.1463            | 68.1463                      | T up vs N                              | 26.97   | 166.927   | 99.0293    | 1         |
| cg13248299                                                       | CMKLR1;CMKLR1;CMKLR1;CMKLR1   | 2.67E-05          | 2.67E-05             | 0.234467           | -4.265                       | T down vs N                            | 33.723  | 19.7043   | 9.34882    | 1         |
| cg13248581                                                       | CECR1;CECR1                   | 0.0004101         | 0.000410102          | 5.16167            | 5.16167                      | T up vs N                              | 19.73   | 25.2299   | 20.4607    | 1         |
| cg13249591                                                       | S100A10                       | 0.00306598        | 0.00306598           | 3.53576            | 3.53576                      | T up vs N                              | 12.138  | 14.9389   | 19.6927    | 1         |
| cg13252226                                                       | TRIM15                        | 0.00157378        | 0.00157378           | 0.306303           | -3.26474                     | T down vs N                            | 14.438  | 13.1118   | 14.5307    | 1         |
| cg13252401                                                       | NGEF;NGEF                     | 0.00011146        | 0.000111462          | 4.40423            | 4.40423                      | T up vs N                              | 25.804  | 20.5868   | 12.765     | 1         |
| cg13255282                                                       | CYTL1                         | 0.0008791         | 0.000879102          | 0.265775           | -3.76259                     | T down vs N                            | 17.109  | 15.4787   | 13.5705    | 1         |
| cg13257485                                                       | NXT2                          | 4.95E-06          | 4.95E-06             | 0.163764           | -6.10635                     | T down vs N                            | 45.116  | 30.6618   | 10.8738    | 1         |
| cg13261883                                                       | SDK1                          | 0.00608792        | 0.00608792           | 0.2784             | -3.59195                     | T down vs N                            | 9.975   | 15.3143   | 24.5642    | 1         |
| cg13266763                                                       | ZC3H12D                       | 0.00408401        | 0.00408401           | 0.273861           | -3.65149                     | T down vs N                            | 11.21   | 15.7106   | 22.4247    | 1         |
| cg13272743                                                       | BOC                           | 2.65E-05          | 2.65E-05             | 0.18577            | -5.383                       | T down vs N                            | 33.778  | 26.5373   | 12.5701    | 1         |
| cg13275322                                                       | WAS                           | 0.00050758        | 0.000507582          | 0.313301           | -3.19182                     | T down vs N                            | 18.828  | 12.6159   | 10.721     | 1         |
| cg13276631                                                       | PRSS42                        | 6.11E-05          | 6.11E-05             | 0.221385           | -4.51702                     | T down vs N                            | 28.965  | 21.2951   | 11.7633    | 1         |
| cg13278004                                                       | SP140L                        | 0.0014302         | 0.0014302            | 0.256793           | -3.89418                     | T down vs N                            | 14.784  | 17.3105   | 18.7339    | 1         |
| cg13280882                                                       | SLC22A3                       | 0.00093777        | 0.000937773          | 0.286613           | -3.48902                     | T down vs N                            | 16.367  | 14.6258   | 14.2981    | 1         |
| cg13281868                                                       | C6orf142                      | 0.00056231        | 0.000562311          | 0.327851           | -3.05016                     | T down vs N                            | 18.404  | 11.6483   | 10.1269    | 1         |
| cg13282837                                                       | TCL1A;TCL1A                   | 0.00011438        | 0.000114384          | 3.08628            | 3.08628                      | T up vs N                              | 25.673  | 11.8955   | 7.41349    | 1         |
| cg13282971                                                       | AHNAK;AHNAK                   | 5.35E-06          | 5.35E-06             | 0.314158           | -3.18311                     | T down vs N                            | 44.541  | 12.5566   | 4.51057    | 1         |
| cg13283635                                                       | COL9A3                        | 0.00081607        | 0.000816067          | 0.176238           | -5.67415                     | T down vs N                            | 16.907  | 28.2242   | 26.7099    | 1         |
| cg13284386                                                       | RAP2C                         | 0.00179816        | 0.00179816           | 0.28801            | -3.4721                      | T down vs N                            | 13.962  | 14.5122   | 16.6308    | 1         |
| cg13287979                                                       | APOB                          | 0.00020201        | 0.000202006          | 0.294341           | -3.39742                     | T down vs N                            | 22.906  | 14.0096   | 9.78581    | 1         |
| cg13289364                                                       | ORA4A7                        | 1.39E-05          | 1.39E-05             | 0.226444           | -4.41611                     | T down vs N                            | 37.852  | 20.6617   | 8.7337     | 1         |
| cg13289884                                                       | CDKN1B                        | 0.00116965        | 0.00116965           | 0.310089           | -3.22488                     | T down vs N                            | 15.528  | 12.841    | 13.2317    | 1         |
| cg13290745                                                       | FABP6;FABP6;FABP6             | 0.0003507         | 0.000350702          | 0.219334           | -4.55927                     | T down vs N                            | 20.407  | 21.5588   | 16.9032    | 1         |
| cg13294032                                                       | KIF1C                         | 0.0012816         | 0.0012816            | 0.180037           | -5.55442                     | T down vs N                            | 15.187  | 27.5349   | 29.0083    | 1         |
| PCDHA7;PCDHA6;PCDHA10;PCDHA4;P<br>CDHA11;PCDHA12;PCDHA12;PCDHA8; |                               |                   |                      |                    |                              |                                        |         |           |            |           |
| cg13295463                                                       | PCDHA1;PCDHA2;PCDHA6;PCDHA1   | 0.00032513        | 0.000325133          | 3.58314            | 3.58314                      | T up vs N                              | 20.74   | 15.2555   | 11.7692    | 1         |
| cg13296579                                                       | OPCML                         | 1.04E-06          | 1.04E-06             | 0.27955            | -3.57717                     | T down vs N                            | 58.028  | 15.2157   | 4.19543    | 1         |
| cg13298147                                                       | TFAP2A;TFAP2A                 | 0.00579909        | 0.00579909           | 0.23784            | -4.20451                     | T down vs N                            | 10.122  | 19.3182   | 30.5372    | 1         |
| cg13300273                                                       | GPR25                         | 1.63E-05          | 1.63E-05             | 25.2583            | 25.2583                      | T up vs N                              | 36.799  | 97.665    | 42.4638    | 1         |
| cg13302154                                                       | MGP                           | 0.00397028        | 0.00397028           | 0.215204           | -4.64675                     | T down vs N                            | 11.299  | 22.1024   | 31.2973    | 1         |
| cg13305444                                                       | ENAH;ENAH                     | 0.00596484        | 0.00596484           | 0.320858           | -3.11665                     | T down vs N                            | 10.037  | 12.1031   | 19.2944    | 1         |
| cg13305793                                                       | HHAT;HHAT;HHAT;HHAT;HHAT;HHAT | 1.14E-07          | 1.14E-07             | 0.227065           | -4.40402                     | T down vs N                            | 81.26   | 20.5855   | 4.05326    | 1         |
| cg13305823                                                       | MAS1L                         | 0.00033875        | 0.000338748          | 0.301256           | -3.31943                     | T down vs N                            | 20.559  | 13.4826   | 10.4929    | 1         |
| cg13306478                                                       | ALOX5AP                       | 0.00212279        | 0.00212279           | 0.306637           | -3.26118                     | T down vs N                            | 13.381  | 13.0877   | 15.6498    | 1         |
| PCDHGA4;PCDHGA2;PCDHGA5;PCDHG<br>B2;PCDHGA1;PCDHGB1;PCDHGA3;PC   |                               |                   |                      |                    |                              |                                        |         |           |            |           |
| cg13307880                                                       | DHGA5                         | 5.13E-06          | 5.13E-06             | 7.11467            | 7.11467                      | T up vs N                              | 44.849  | 36.0603   | 12.8645    | 1         |
| cg13309012                                                       | MIR155HG;MIR155               | 1.84E-07          | 1.84E-07             | 0.146691           | -6.81706                     | T down vs N                            | 75.644  | 34.5068   | 7.29879    | 1         |
| cg13313047                                                       | CABLES1;CABLES1;CABLES1       | 0.00060695        | 0.000606951          | 0.312728           | -3.19766                     | T down vs N                            | 18.091  | 12.6557   | 11.193     | 1         |
| cg13316295                                                       | C8orf85                       | 2.67E-05          | 2.67E-05             | 0.257599           | -3.882                       | T down vs N                            | 33.728  | 17.2308   | 8.17389    | 1         |
| cg13316625                                                       | NOS1                          | 8.59E-06          | 8.59E-06             | 0.233839           | -4.27645                     | T down vs N                            | 41.119  | 19.7773   | 7.69559    | 1         |
| cg13316854                                                       | HOXD3                         | 5.27E-05          | 5.27E-05             | 15.3496            | 15.3496                      | T up vs N                              | 29.781  | 69.8607   | 37.5327    | 1         |
| cg13318121                                                       | FABP5                         | 9.64E-05          | 9.64E-05             | 4.21357            | 4.21357                      | T up vs N                              | 26.544  | 19.3761   | 11.6793    | 1         |
| cg13318964                                                       | C6orf10                       | 3.55E-05          | 3.55E-05             | 0.326484           | -3.06294                     | T down vs N                            | 32.035  | 11.7358   | 5.86155    | 1         |
| cg13319761                                                       | ORA4A7                        | 0.00502195        | 0.00502195           | 0.262591           | -3.8082                      | T down vs N                            | 10.562  | 16.7466   | 25.369     | 1         |
| cg13320842                                                       | GIPR                          | 0.0020241         | 0.0020241            | 0.331163           | -3.01966                     | T down vs N                            | 13.546  | 11.4393   | 13.5117    | 1         |
| cg13321166                                                       | MS4A3;MS4A3;MS4A3             | 0.00210282        | 0.00210282           | 0.331464           | -3.01692                     | T down vs N                            | 13.413  | 11.4205   | 13.6229    | 1         |
| cg13321745                                                       | MSI1                          | 0.0001081         | 0.000108101          | 0.32966            | -3.03342                     | T down vs N                            | 25.959  | 11.5336   | 7.10878    | 1         |
| cg13324103                                                       | SVIL                          | 2.87E-05          | 2.87E-05             | 0.243944           | -4.0993                      | T down vs N                            | 33.291  | 18.6424   | 8.95966    | 1         |
| cg13327911                                                       | COL21A1                       | 9.78E-05          | 9.78E-05             | 0.122829           | -8.14137                     | T down vs N                            | 26.471  | 41.1852   | 24.8935    | 1         |
| cg13329248                                                       | C1orf94;C1orf94;C1orf94       | 2.56E-05          | 2.56E-05             | 6.61642            | 6.61642                      | T up vs N                              | 33.992  | 33.4411   | 15.7408    | 1         |
| cg13329346                                                       | STC2                          | 4.90E-06          | 4.90E-06             | 0.237115           | -4.21736                     | T down vs N                            | 45.184  | 19.4003   | 6.86988    | 1         |
| cg13338207                                                       | ST3GAL6                       | 0.00199863        | 0.00199863           | 0.312162           | -3.20346                     | T down vs N                            | 13.59   | 12.6952   | 14.9464    | 1         |
| cg13338350                                                       | ZNFB611;ZNFB611;ZNFB611       | 0.00011501        | 0.000115005          | 4.15491            | 4.15491                      | T up vs N                              | 25.646  | 19.0002   | 11.8539    | 1         |
| cg13338783                                                       | PNMAL2                        | 0.00010133        | 0.000101327          | 3.26288            | 3.26288                      | T up vs N                              | 26.289  | 13.0992   | 7.97233    | 1         |
| ARHGAP25;ARHGAP25;ARHGAP25;AR                                    |                               |                   |                      |                    |                              |                                        |         |           |            |           |
| cg13339825                                                       | HGAP25                        | 7.12E-07          | 7.12E-07             | 0.126301           | -7.91761                     | T down vs N                            | 61.575  | 40.0978   | 10.4192    | 1         |
| cg13340126                                                       | SLC9A3                        | 3.59E-06          | 3.59E-06             | 0.170645           | -5.86013                     | T down vs N                            | 47.581  | 29.2827   | 9.84692    | 1         |

| Probeset ID | UCSC_REFGENE_NAME                                       | p-value<br>(Type) | p-value (T vs.<br>N) | Ratio (T<br>vs. N) | Fold-<br>Change (T<br>vs. N) | Fold-Change (T vs.<br>N) (Description) | F(Type) | SS (Type) | SS (Error) | F (Error) |
|-------------|---------------------------------------------------------|-------------------|----------------------|--------------------|------------------------------|----------------------------------------|---------|-----------|------------|-----------|
| cg13343687  | UBA7                                                    | 6.55E-05          | 6.55E-05             | 0.228269           | -4.38079                     | T down vs N                            | 28.586  | 20.4389   | 11.4398    | 1         |
| cg13344886  | CDCP1;CDCP1                                             | 0.00030109        | 0.00030109           | 0.275915           | -3.6243                      | T down vs N                            | 21.825  | 14.6163   | 10.0457    | 1         |
| cg13350140  | RET;RET                                                 | 0.00294057        | 0.00294057           | 0.327723           | -3.05136                     | T down vs N                            | 12.276  | 11.6565   | 15.1928    | 1         |
| cg13354414  | ZNF804B;MGC26647                                        | 2.59E-05          | 2.59E-05             | 0.282202           | -3.54356                     | T down vs N                            | 33.912  | 14.9911   | 7.07302    | 1         |
| cg13354679  | EYA4;EYA4;EYA4                                          | 7.59E-05          | 7.59E-05             | 0.165991           | -6.02441                     | T down vs N                            | 27.797  | 30.2056   | 17.3864    | 1         |
| cg13354988  | ACP1;ACP1;SH3YL1;ACP1;SH3YL1;ACP1                       | 0.00509364        | 0.00509364           | 7.34256            | 7.34256                      | T up vs N                              | 10.518  | 37.2285   | 56.6311    | 1         |
| cg13355874  | NPHP4                                                   | 0.00034613        | 0.000346126          | 0.213387           | -4.68632                     | T down vs N                            | 20.464  | 22.347    | 17.472     | 1         |
| cg13356117  | TTC12                                                   | 0.00013455        | 0.000134549          | 31.9919            | 31.9919                      | T up vs N                              | 24.863  | 112.484   | 72.387     | 1         |
| cg13356175  | S100A7L2                                                | 1.98E-06          | 1.98E-06             | 0.104311           | -9.58672                     | T down vs N                            | 52.392  | 47.8546   | 14.6144    | 1         |
| cg13357229  | SFRP2                                                   | 0.00109072        | 0.00109072           | 0.299321           | -3.3409                      | T down vs N                            | 15.79   | 13.6279   | 13.8089    | 1         |
| cg13357341  | ARNT;ARNT;ARNT                                          | 1.41E-05          | 1.41E-05             | 0.269245           | -3.71409                     | T down vs N                            | 37.741  | 16.1257   | 6.83634    | 1         |
| cg13358773  | COIL                                                    | 2.96E-06          | 2.96E-06             | 0.231415           | -4.32124                     | T down vs N                            | 49.097  | 20.0619   | 6.53791    | 1         |
| cg13360823  | CACNG6;CACNG6;CACNG6                                    | 7.45E-05          | 7.45E-05             | 3.4009             | 3.4009                       | T up vs N                              | 27.894  | 14.0331   | 8.04951    | 1         |
| cg13362794  | WWC1;WWC1;WWC1                                          | 0.00084327        | 0.000843273          | 0.319508           | -3.12982                     | T down vs N                            | 16.779  | 12.1931   | 11.6272    | 1         |
| cg13365972  | HCCA2;KRTAP5-3                                          | 1.46E-05          | 1.46E-05             | 0.307766           | -3.24922                     | T down vs N                            | 37.523  | 13.0064   | 5.54602    | 1         |
| cg13366738  | LCE6A                                                   | 0.00015076        | 0.000150758          | 0.183345           | -5.45419                     | T down vs N                            | 24.305  | 26.9532   | 17.7435    | 1         |
| cg13366774  | C12orf59                                                | 2.13E-05          | 2.13E-05             | 0.277873           | -3.59877                     | T down vs N                            | 35.127  | 15.3597   | 6.99618    | 1         |
| cg13367234  | CROCC                                                   | 3.33E-05          | 3.33E-05             | 0.140906           | -7.09693                     | T down vs N                            | 32.417  | 35.9687   | 17.7528    | 1         |
| cg13369337  | PRPF18                                                  | 6.72E-06          | 6.72E-06             | 0.261108           | -3.82984                     | T down vs N                            | 42.862  | 16.8888   | 6.30448    | 1         |
| cg13371705  | CACNA1C;CACNA1C;CACNA1C;CACNA1C;CACNA1C;CACNA1C;CACNA1C | 6.31E-07          | 6.31E-07             | 0.263737           | -3.79165                     | T down vs N                            | 62.74   | 16.6377   | 4.24293    | 1         |
| cg13371767  | ATP11A;ATP11A                                           | 0.00193359        | 0.00193359           | 0.215518           | -4.63999                     | T down vs N                            | 13.706  | 22.0605   | 25.753     | 1         |
| cg13372231  | UBQLN3                                                  | 0.00012183        | 0.000121832          | 0.240657           | -4.15529                     | T down vs N                            | 25.356  | 19.0027   | 11.9908    | 1         |
| cg13378687  | NT5C1B;NT5C1B                                           | 0.0006789         | 0.000678897          | 0.322138           | -3.10426                     | T down vs N                            | 17.638  | 12.0185   | 10.9026    | 1         |
| cg13378781  | COL23A1                                                 | 0.00281136        | 0.00281136           | 0.149191           | -6.70283                     | T down vs N                            | 12.425  | 33.9019   | 43.6552    | 1         |
| cg13380325  | LOC388387;G6PC                                          | 5.11E-05          | 5.11E-05             | 0.156499           | -6.38984                     | T down vs N                            | 29.947  | 32.2191   | 17.2141    | 1         |
| cg13381110  | PHLPP1                                                  | 0.00143945        | 0.00143945           | 0.327463           | -3.05378                     | T down vs N                            | 14.761  | 11.6731   | 12.6531    | 1         |
| cg13381984  | LEP;LEP                                                 | 9.06E-05          | 9.06E-05             | 9.12198            | 9.12198                      | T up vs N                              | 26.869  | 45.7737   | 27.2577    | 1         |
| cg13383435  | MIR128-2;ARPP-21                                        | 0.00067335        | 0.000673353          | 3.82969            | 3.82969                      | T up vs N                              | 17.671  | 16.8879   | 15.2913    | 1         |
| cg13385220  | LGR6;LGR6;LGR6                                          | 0.00019478        | 0.000194784          | 0.159183           | -6.2821                      | T down vs N                            | 23.077  | 31.631    | 21.9306    | 1         |
| cg13388983  | RHOD                                                    | 4.69E-06          | 4.69E-06             | 9.52779            | 9.52779                      | T up vs N                              | 45.515  | 47.5939   | 16.7309    | 1         |
| cg13389502  | HIC1;HIC1                                               | 0.00016758        | 0.000167575          | 3.81882            | 3.81882                      | T up vs N                              | 23.793  | 16.8164   | 11.3084    | 1         |
| cg13390101  | TNFSF15                                                 | 1.66E-05          | 1.66E-05             | 0.307825           | -3.2486                      | T down vs N                            | 36.697  | 13.0022   | 5.66897    | 1         |
| cg13390388  | EBF2                                                    | 0.00288844        | 0.00288844           | 0.31554            | -3.16917                     | T down vs N                            | 12.335  | 12.4616   | 16.1639    | 1         |
| cg13390630  | CDH22                                                   | 0.0012074         | 0.0012074            | 7.17061            | 7.17061                      | T up vs N                              | 15.409  | 36.3488   | 37.7434    | 1         |
| cg13391244  | C7orf58;C7orf58;C7orf58                                 | 6.74E-06          | 6.74E-06             | 0.186629           | -5.35821                     | T down vs N                            | 42.844  | 26.392    | 9.85612    | 1         |
| cg13391638  | TMEM168                                                 | 2.42E-05          | 2.42E-05             | 0.278849           | -3.58617                     | T down vs N                            | 34.329  | 15.2757   | 7.11963    | 1         |
| cg13396821  | KCNN3;KCNN3                                             | 0.00032561        | 0.000325608          | 0.278584           | -3.58958                     | T down vs N                            | 20.733  | 15.2984   | 11.806     | 1         |
| cg13397260  | PTGR1;PTGR1;PTGR1                                       | 0.00662839        | 0.00662839           | 0.278717           | -3.58786                     | T down vs N                            | 9.7205  | 15.287    | 25.1625    | 1         |
| cg13397275  | KANK4                                                   | 0.00034105        | 0.000341045          | 0.324355           | -3.08305                     | T down vs N                            | 20.529  | 11.8734   | 9.25388    | 1         |
| cg13397379  | OR2C3                                                   | 9.12E-05          | 9.12E-05             | 0.30778            | -3.24907                     | T down vs N                            | 26.833  | 13.0054   | 7.7549     | 1         |
| cg13401840  | SPRR2C                                                  | 0.00014301        | 0.00014301           | 0.196488           | -5.08937                     | T down vs N                            | 25.53   | 23.3394   | 13.7128    | 1         |
| cg13401893  | RNF39;RNF39                                             | 0.00128961        | 0.00128961           | 4.72089            | 4.72089                      | T up vs N                              | 15.164  | 22.5602   | 23.8036    | 1         |
| cg13402672  | ATP6V0B;ATP6V0B                                         | 1.20E-05          | 1.20E-05             | 0.222763           | -4.48907                     | T down vs N                            | 38.816  | 21.1201   | 8.70568    | 1         |
| cg13403223  | KIAA0913                                                | 0.00047425        | 0.000474247          | 0.258317           | -3.87122                     | T down vs N                            | 19.112  | 17.1602   | 14.3657    | 1         |
| cg13403695  | SNORD115-14                                             | 0.00133919        | 0.00133919           | 0.277502           | -3.60357                     | T down vs N                            | 15.025  | 15.3917   | 16.3903    | 1         |
| cg13408605  | SIRPG;SIRPG;SIRPG                                       | 1.48E-05          | 1.48E-05             | 0.138137           | -7.2392                      | T down vs N                            | 37.437  | 36.7009   | 15.6856    | 1         |
| cg13408606  | PRPF4;CDC26                                             | 0.00099554        | 0.000995536          | 0.215091           | -4.64919                     | T down vs N                            | 16.137  | 22.1175   | 21.9293    | 1         |
| cg13409170  | NR6A1;NR6A1                                             | 0.00129419        | 0.00129419           | 0.160456           | -6.23223                     | T down vs N                            | 15.57   | 29.5127   | 28.4315    | 1         |
| cg13411229  | SLURP1                                                  | 4.08E-05          | 4.08E-05             | 0.284482           | -3.51516                     | T down vs N                            | 31.226  | 14.801    | 7.58402    | 1         |
| cg13411784  | WDR85                                                   | 0.00678569        | 0.00678569           | 5.80656            | 5.80656                      | T up vs N                              | 9.6508  | 28.9793   | 48.0444    | 1         |
| cg13411923  | WDR66                                                   | 8.92E-05          | 8.92E-05             | 5.82643            | 5.82643                      | T up vs N                              | 26.947  | 29.092    | 17.2738    | 1         |
| cg13412754  | MAPKAP1;MAPKAP1;MAPKAP1;MAPKAP1                         | 0.00180266        | 0.00180266           | 0.182183           | -5.489                       | T down vs N                            | 13.953  | 27.1557   | 31.14      | 1         |
| cg13413792  | DENND1A;DENND1A                                         | 4.07E-06          | 4.07E-06             | 0.111023           | -9.00713                     | T down vs N                            | 46.607  | 45.2505   | 15.5342    | 1         |
| cg13413955  | DMRT1                                                   | 0.00045863        | 0.000458626          | 10.1769            | 10.1769                      | T up vs N                              | 19.254  | 50.4176   | 41.8976    | 1         |
| cg13414679  | CTTN;CTTN                                               | 0.00131343        | 0.00131343           | 0.326669           | -3.06121                     | T down vs N                            | 15.097  | 11.7239   | 12.4254    | 1         |
| cg13418839  | STARD3;STARD3;STARD3                                    | 2.36E-05          | 2.36E-05             | 0.303394           | -3.29604                     | T down vs N                            | 34.48   | 13.3242   | 6.18298    | 1         |
| cg13419330  | IRAK2                                                   | 2.34E-05          | 2.34E-05             | 0.26596            | -3.75997                     | T down vs N                            | 34.531  | 16.4288   | 7.61228    | 1         |
| cg13419692  | PHF19                                                   | 0.0007993         | 0.000799295          | 0.317368           | -3.15092                     | T down vs N                            | 16.989  | 12.3371   | 11.6191    | 1         |
| cg13420975  | LMX1B                                                   | 1.73E-06          | 1.73E-06             | 0.214789           | -4.65573                     | T down vs N                            | 53.528  | 22.1579   | 6.62316    | 1         |
| cg13423140  | AVPR2                                                   | 0.00080335        | 0.000803346          | 0.308351           | -3.24306                     | T down vs N                            | 16.969  | 12.9646   | 12.2244    | 1         |
| cg13423383  | CLIC3                                                   | 0.00394131        | 0.00394131           | 3.55914            | 3.55914                      | T up vs N                              | 11.323  | 15.0952   | 21.3309    | 1         |
| cg13426079  | KCNQ4;KCNQ4                                             | 0.00018928        | 0.000189281          | 3.02895            | 3.02895                      | T up vs N                              | 23.213  | 11.503    | 7.92882    | 1         |
| cg13427810  | COL27A1                                                 | 3.32E-05          | 3.32E-05             | 0.310907           | -3.21639                     | T down vs N                            | 32.435  | 12.7832   | 6.306      | 1         |
| cg13430450  | ABCA1                                                   | 7.87E-05          | 7.87E-05             | 0.26217            | -3.81433                     | T down vs N                            | 27.603  | 16.7869   | 9.73064    | 1         |
| cg13430807  | MTMR11;MTMR11                                           | 7.28E-06          | 7.28E-06             | 0.194546           | -5.14017                     | T down vs N                            | 42.289  | 25.1018   | 9.49715    | 1         |
| cg13431800  | GXYLT1;GXYLT1                                           | 0.0001867         | 0.000186702          | 0.241294           | -4.14431                     | T down vs N                            | 23.278  | 18.9322   | 13.0132    | 1         |
| cg13432032  | SCAPER;SCAPER                                           | 9.01E-05          | 9.01E-05             | 0.259327           | -3.85614                     | T down vs N                            | 26.896  | 17.0614   | 10.1494    | 1         |

| Probeset ID | UCSC_REFGENE_NAME                                           | p-value<br>(Type) | p-value (T vs.<br>N) | Ratio (T<br>vs. N) | Fold-<br>Change (T<br>vs. N) | Fold-Change (T vs.<br>N) (Description) | F(Type) | SS (Type) | SS (Error) | F (Error) |
|-------------|-------------------------------------------------------------|-------------------|----------------------|--------------------|------------------------------|----------------------------------------|---------|-----------|------------|-----------|
| cg13432241  | KIAA0922;KIAA0922                                           | 5.10E-06          | 5.10E-06             | 0.207316           | -4.82356                     | T down vs N                            | 44.885  | 23.1901   | 8.2664     | 1         |
| cg13432737  | IKZF3;IKZF3;IKZF3;IKZF3;IKZF3;IKZF3                         | 0.00022734        | 0.000227339          | 0.246708           | -4.05337                     | T down vs N                            | 22.356  | 18.3458   | 13.1301    | 1         |
| cg13433250  | LOC100132215<br>WDR65;WDR65;EBNA1BP2;EBNA1BP2               | 0.00116282        | 0.00116282           | 3.72397            | 3.72397                      | T up vs N                              | 15.549  | 16.191    | 16.6602    | 1         |
| cg13433694  | WDR65;WDR65                                                 | 0.00013294        | 0.00013294           | 0.282073           | -3.54519                     | T down vs N                            | 24.922  | 15.002    | 9.63124    | 1         |
| cg13434308  | TMTCT1                                                      | 0.00144239        | 0.00144239           | 3.79896            | 3.79896                      | T up vs N                              | 14.753  | 16.6858   | 18.0957    | 1         |
| cg13434638  | ITGA11                                                      | 0.00057864        | 0.000578642          | 34.3026            | 34.3026                      | T up vs N                              | 18.286  | 117.056   | 102.422    | 1         |
| cg13439315  | SORCS2                                                      | 0.00145071        | 0.00145071           | 0.309698           | -3.22895                     | T down vs N                            | 14.733  | 12.8687   | 13.9758    | 1         |
| cg13441213  | OR2T34                                                      | 6.76E-07          | 6.76E-07             | 0.129679           | -7.71137                     | T down vs N                            | 62.064  | 39.0813   | 10.0751    | 1         |
| cg13442709  | PIP5K1B                                                     | 0.00012058        | 0.000120579          | 0.326672           | -3.06118                     | T down vs N                            | 25.408  | 11.7237   | 7.38267    | 1         |
| cg13442966  | MBP;MBP;MBP;MBP;MBP;MBP;MBP;                                | 0.00088229        | 0.000882285          | 4.00626            | 4.00626                      | T up vs N                              | 16.603  | 18.0406   | 17.3858    | 1         |
| cg13442969  | DYRK2;DYRK2                                                 | 2.58E-05          | 2.58E-05             | 0.308859           | -3.23772                     | T down vs N                            | 33.946  | 12.9283   | 6.09356    | 1         |
| cg13443627  | TACSTD2;TACSTD2                                             | 4.54E-06          | 4.54E-06             | 22.6978            | 22.6978                      | T up vs N                              | 45.775  | 91.3066   | 31.9153    | 1         |
| cg13444135  | KIR2DL4;KIR2DL4;KIR2DL4                                     | 0.00020045        | 0.000200454          | 0.288858           | -3.4619                      | T down vs N                            | 22.942  | 14.4437   | 10.0731    | 1         |
| cg13444533  | RASEF                                                       | 2.48E-05          | 2.48E-05             | 0.27721            | -3.60737                     | T down vs N                            | 34.178  | 15.417    | 7.21732    | 1         |
| cg13446622  | SDR9C7                                                      | 0.00012726        | 0.000127255          | 0.26816            | -3.72912                     | T down vs N                            | 25.139  | 16.2251   | 10.3266    | 1         |
| cg13447818  | FLG                                                         | 0.00045662        | 0.000456621          | 0.209645           | -4.76997                     | T down vs N                            | 19.272  | 22.8619   | 18.9803    | 1         |
| cg13448406  | APTX;APTX                                                   | 0.0005621         | 0.000562102          | 0.239554           | -4.17443                     | T down vs N                            | 18.405  | 19.1255   | 16.6261    | 1         |
| cg13448968  | CHPF                                                        | 0.00048426        | 0.000484262          | 14.3622            | 14.3622                      | T up vs N                              | 19.025  | 66.5006   | 55.9279    | 1         |
| cg13448978  | FGR                                                         | 4.64E-05          | 4.64E-05             | 6.8129             | 6.8129                       | T up vs N                              | 30.497  | 34.4849   | 18.0925    | 1         |
| cg13449372  | C10orf2;MRPL43;MRPL43;MRPL43;C10orf2;C10orf2;C10orf2;MRPL43 | 6.45E-06          | 6.45E-06             | 0.130713           | -7.65037                     | T down vs N                            | 43.161  | 38.778    | 14.3753    | 1         |
| cg13451008  | ZNF735                                                      | 0.0001942         | 0.000194204          | 0.293207           | -3.41056                     | T down vs N                            | 23.091  | 14.0982   | 9.76869    | 1         |
| cg13452868  | POTEA;POTEA                                                 | 0.00043564        | 0.000435642          | 0.236485           | -4.2286                      | T down vs N                            | 19.472  | 19.4722   | 16.0005    | 1         |
| cg13455257  | TMOD4                                                       | 2.07E-05          | 2.07E-05             | 0.171047           | -5.84634                     | T down vs N                            | 35.297  | 29.2047   | 13.2383    | 1         |
| cg13455434  | RBPMS;RBPMS;RBPMS;RBPMS                                     | 5.34E-05          | 5.34E-05             | 0.308316           | -3.24342                     | T down vs N                            | 29.704  | 12.967    | 6.98463    | 1         |
| cg13456138  | FAS;FAS;FAS;FAS;FAS;FAS;FAS                                 | 0.00036511        | 0.000365114          | 0.2973             | -3.36361                     | T down vs N                            | 20.231  | 13.7814   | 10.8991    | 1         |
| cg13457165  | HEYL                                                        | 2.07E-06          | 2.07E-06             | 17.7741            | 17.7741                      | T up vs N                              | 52.035  | 77.5648   | 23.85      | 1         |
| cg13457496  | IQCE;IQCE                                                   | 0.00036627        | 0.000366272          | 0.304414           | -3.285                       | T down vs N                            | 20.217  | 13.2493   | 10.4854    | 1         |
| cg13457515  | SP6                                                         | 0.00093116        | 0.000931163          | 0.245471           | -4.07381                     | T down vs N                            | 16.394  | 18.4779   | 18.0339    | 1         |
| cg13457522  | ZNF782                                                      | 4.82E-05          | 4.82E-05             | 0.287328           | -3.48034                     | T down vs N                            | 30.283  | 14.5675   | 7.69671    | 1         |
| cg13458255  | C8orf71                                                     | 0.00074627        | 0.000746272          | 0.328373           | -3.045                       |                                        |         |           |            |           |

| Probeset ID | UCSC_REFGENE_NAME             | p-value<br>(Type) | p-value (T vs.<br>N) | Ratio (T<br>vs. N) | Fold-<br>Change (T<br>vs. N) | Fold-Change (T vs.<br>N) (Description) | F(Type) | SS (Type) | SS (Error) | F (Error) |
|-------------|-------------------------------|-------------------|----------------------|--------------------|------------------------------|----------------------------------------|---------|-----------|------------|-----------|
| cg13496915  | NPAS3;NPAS3;NPAS3;NPAS3       | 0.00029786        | 0.00029786           | 0.258144           | -3.8738                      | T down vs N                            | 21.129  | 17.1771   | 13.0078    | 1         |
| cg13499371  | ADAM6                         | 1.47E-05          | 1.47E-05             | 0.275253           | -3.63302                     | T down vs N                            | 37.497  | 15.5878   | 6.6514     | 1         |
| cg13499395  | C9orf171                      | 0.00085072        | 0.000850719          | 3.16783            | 3.16783                      | T up vs N                              | 16.744  | 12.4524   | 11.8988    | 1         |
| cg13500072  | FAM176B                       | 1.00E-05          | 1.00E-05             | 11.0437            | 11.0437                      | T up vs N                              | 40.054  | 54.0326   | 21.584     | 1         |
| cg13501527  | PHF19;PHF19                   | 4.27E-05          | 4.27E-05             | 0.300938           | -3.32294                     | T down vs N                            | 30.961  | 13.5064   | 6.97992    | 1         |
| cg13504059  | CCR7                          | 6.57E-06          | 6.57E-06             | 0.295999           | -3.37839                     | T down vs N                            | 43.029  | 13.8812   | 5.16158    | 1         |
| cg13505608  | SLC34A3                       | 0.00051242        | 0.000512416          | 0.291848           | -3.42644                     | T down vs N                            | 18.788  | 14.2052   | 12.097     | 1         |
| cg13505664  | GALP;GALP                     | 0.00262662        | 0.00262662           | 0.29072            | -3.43974                     | T down vs N                            | 12.653  | 14.2947   | 18.0756    | 1         |
| cg13507224  | OR10J3                        | 7.97E-05          | 7.97E-05             | 0.19508            | -5.1261                      | T down vs N                            | 27.54   | 25.0178   | 14.5348    | 1         |
| cg13507893  | SLC5A4                        | 0.00318317        | 0.00318317           | 0.299825           | -3.33528                     | T down vs N                            | 12.014  | 13.5899   | 18.0985    | 1         |
| cg13509608  | GCN1L1                        | 7.13E-06          | 7.13E-06             | 0.220254           | -4.5402                      | T down vs N                            | 42.438  | 21.4399   | 8.08327    | 1         |
| cg13510648  | VCX3A                         | 0.00041015        | 0.000410147          | 0.188094           | -5.31649                     | T down vs N                            | 19.729  | 26.1468   | 21.2047    | 1         |
| cg13518079  | EBF4                          | 0.00024589        | 0.000245886          | 0.246038           | -4.06442                     | T down vs N                            | 23.758  | 16.3709   | 9.64719    | 1         |
| cg13518366  | NCR1;NCR1;NCR1;NCR1;NCR1      | 3.59E-06          | 3.59E-06             | 0.299523           | -3.33864                     | T down vs N                            | 47.565  | 13.6126   | 4.579      | 1         |
| cg13519373  | CXCR1                         | 1.06E-05          | 1.06E-05             | 0.268601           | -3.723                       | T down vs N                            | 39.694  | 16.1846   | 6.52378    | 1         |
| cg13519863  | VAX2                          | 0.00385836        | 0.00385836           | 0.315565           | -3.16892                     | T down vs N                            | 11.391  | 12.4599   | 17.5019    | 1         |
| cg13521620  | YPEL2                         | 0.00019123        | 0.000191227          | 4.71035            | 4.71035                      | T up vs N                              | 23.164  | 22.4953   | 15.538     | 1         |
| cg13521739  | RTBDN;RTBDN                   | 0.00011628        | 0.000116277          | 0.321              | -3.11526                     | T down vs N                            | 25.591  | 12.0937   | 7.56133    | 1         |
| cg13521941  | ENTPD8;ENTPD8                 | 0.0004096         | 0.000409601          | 0.253645           | -3.94252                     | T down vs N                            | 19.735  | 17.6261   | 14.2904    | 1         |
| cg13523014  | MYO1F                         | 3.97E-05          | 3.97E-05             | 0.076077           | -13.1447                     | T down vs N                            | 31.391  | 62.1525   | 31.6794    | 1         |
| cg13523468  | SYN2;SYN2                     | 0.00096543        | 0.000965426          | 0.26175            | -3.82044                     | T down vs N                            | 16.255  | 16.8271   | 16.5632    | 1         |
| cg13524082  | THY1                          | 0.00052332        | 0.000523315          | 0.233954           | -4.27435                     | T down vs N                            | 18.701  | 19.7639   | 16.9095    | 1         |
| cg13527631  | ECE2                          | 8.70E-06          | 8.70E-06             | 0.307112           | -3.25614                     | T down vs N                            | 41.035  | 13.0534   | 5.0897     | 1         |
| cg13528513  | AGTR1;AGTR1;AGTR1;AGTR1       | 7.10E-06          | 7.10E-06             | 0.222635           | -4.49165                     | T down vs N                            | 42.47   | 21.1363   | 7.96286    | 1         |
| cg13529513  | PAX5                          | 9.29E-05          | 9.29E-05             | 0.188083           | -5.31681                     | T down vs N                            | 26.736  | 26.1486   | 15.6487    | 1         |
| cg13530938  | LOC151174;LOC643387;LOC151174 | 0.00010186        | 0.000101864          | 44.9572            | 44.9572                      | T up vs N                              | 26.262  | 135.654   | 82.646     | 1         |
| cg13531667  | MCC                           | 6.07E-05          | 6.07E-05             | 0.249017           | -4.01578                     | T down vs N                            | 29.004  | 18.1024   | 9.98613    | 1         |
| cg13532055  | FXN;FXN;FXN                   | 3.03E-07          | 3.03E-07             | 0.214569           | -4.6605                      | T down vs N                            | 70.203  | 22.1875   | 5.05675    | 1         |
| cg13533142  | JSRP1                         | 2.25E-05          | 2.25E-05             | 0.18834            | -5.30954                     | T down vs N                            | 34.779  | 26.1058   | 12.0099    | 1         |
| cg13533935  | BLK                           | 3.54E-06          | 3.54E-06             | 0.312853           | -3.19639                     | T down vs N                            | 47.674  | 12.6471   | 4.24452    | 1         |
| cg13534901  | AHR                           | 8.06E-05          | 8.06E-05             | 0.294862           | -3.39142                     | T down vs N                            | 27.476  | 13.9691   | 8.13449    | 1         |
| cg13535489  | LILRB5;LILRB5;LILRB5          | 0.00027663        | 0.000276633          | 0.218074           | -4.58559                     | T down vs N                            | 21.46   | 21.7228   | 16.1958    | 1         |
| cg13536107  | FBXW7                         | 4.55E-05          | 4.55E-05             | 0.324717           | -3.07961                     | T down vs N                            | 30.608  | 11.8499   | 6.19433    | 1         |
| cg13538637  | RPA3                          | 0.00118948        | 0.00118948           | 0.276248           | -3.61994                     | T down vs N                            | 15.465  | 15.5007   | 16.0373    | 1         |
| cg13539205  | ZBTB45                        | 0.00672486        | 0.00672486           | 4.12735            | 4.12735                      | T up vs N                              | 9.6776  | 18.8231   | 31.1204    | 1         |
| cg13539395  | CFD                           | 1.56E-05          | 1.56E-05             | 0.159705           | -6.26154                     | T down vs N                            | 37.086  | 31.5183   | 13.5979    | 1         |
| cg13541527  | C6orf48;C6orf48;SNORD52       | 3.94E-05          | 3.94E-05             | 0.218938           | -4.5675                      | T down vs N                            | 31.433  | 21.6101   | 10.9999    | 1         |
| cg13544012  | C9orf98                       | 2.46E-06          | 2.46E-06             | 0.277491           | -3.60372                     | T down vs N                            | 50.577  | 15.3927   | 4.86951    | 1         |
| cg13545212  | SLC13A5;SLC13A5               | 5.09E-06          | 5.09E-06             | 17.9766            | 17.9766                      | T up vs N                              | 44.901  | 78.1768   | 27.8577    | 1         |
| cg13546858  | SAMD11                        | 0.00181111        | 0.00181111           | 4.87724            | 4.87724                      | T up vs N                              | 13.936  | 23.5174   | 26.9999    | 1         |
| cg13547644  | ACTA1                         | 0.00372757        | 0.00372757           | 3.35521            | 3.35521                      | T up vs N                              | 11.501  | 13.7247   | 19.0931    | 1         |
| cg13547694  | MLXIPL;MLXIPL;MLXIPL;MLXIPL   | 0.00029912        | 0.000299118          | 0.171515           | -5.83041                     | T down vs N                            | 21.11   | 29.1145   | 22.0673    | 1         |
| cg13547725  | LOC644145                     | 0.00023386        | 0.000233863          | 0.258593           | -3.86708                     | T down vs N                            | 22.225  | 17.1331   | 12.3341    | 1         |
| cg13549345  | NACC2                         | 0.00105068        | 0.00105068           | 0.327841           | -3.05026                     | T down vs N                            | 15.932  | 11.649    | 11.6988    | 1         |
| cg13551505  | CACNA2D4                      | 0.00116468        | 0.00116468           | 0.321686           | -3.10862                     | T down vs N                            | 15.544  | 12.0483   | 12.4022    | 1         |
| cg13553455  | COL17A1                       | 3.30E-06          | 3.30E-06             | 0.262905           | -3.80365                     | T down vs N                            | 48.234  | 16.7166   | 5.54516    | 1         |
| cg13554033  | CCNK;CCNK                     | 0.00105447        | 0.00105447           | 0.230653           | -4.33551                     | T down vs N                            | 15.918  | 20.1524   | 20.2559    | 1         |
| cg13556639  | NEURL3                        | 0.00089996        | 0.000899957          | 0.266293           | -3.75526                     | T down vs N                            | 16.526  | 16.3978   | 15.8762    | 1         |
| cg13557594  | SLC6A3                        | 3.00E-05          | 3.00E-05             | 0.230148           | -4.34503                     | T down vs N                            | 33.031  | 20.2127   | 9.79103    | 1         |
| cg13558087  | POLR1E                        | 1.54E-05          | 1.54E-05             | 0.163231           | -6.1263                      | T down vs N                            | 37.197  | 30.7724   | 13.2364    | 1         |
| cg13558899  | MSI2;MSI2                     | 0.00034813        | 0.000348132          | 0.333333           | -3                           | T down vs N                            | 20.439  | 11.3045   | 8.84935    | 1         |
| cg13559439  | DLC1;DLC1                     | 0.00027224        | 0.000272243          | 4.62213            | 4.62213                      | T up vs N                              | 21.532  | 21.9497   | 16.3102    | 1         |
| cg13559820  | GLT6D1                        | 0.00027023        | 0.000270228          | 0.285816           | -3.49876                     | T down vs N                            | 21.566  | 14.6911   | 10.8995    | 1         |
| cg13560794  | KRTAP3-2;KRTAP3-2             | 2.19E-05          | 2.19E-05             | 0.272781           | -3.66595                     | T down vs N                            | 34.955  | 15.8066   | 7.23519    | 1         |
| cg13561817  | OR3A4                         | 0.00072654        | 0.000726536          | 0.271052           | -3.68933                     | T down vs N                            | 17.366  | 15.9617   | 14.7058    | 1         |
| cg13563074  | OVCH2                         | 1.54E-05          | 1.54E-05             | 0.165017           | -6.05998                     | T down vs N                            | 37.192  | 30.4039   | 13.0798    | 1         |
| cg13563668  | KLHL31                        | 0.00012036        | 0.000120361          | 0.277289           | -3.60635                     | T down vs N                            | 25.417  | 15.4102   | 9.70068    | 1         |
| cg13563863  | FZR1;FZR1                     | 3.78E-06          | 3.78E-06             | 0.330778           | -3.02318                     | T down vs N                            | 47.171  | 11.4634   | 3.88827    | 1         |
| cg13565461  | C7orf11                       | 2.01E-05          | 2.01E-05             | 0.157001           | -6.36937                     | T down vs N                            | 35.496  | 32.1077   | 14.4727    | 1         |
| cg13566919  | GZMA                          | 0.00059839        | 0.000598391          | 0.248234           | -4.02846                     | T down vs N                            | 18.149  | 18.1846   | 16.0316    | 1         |
| cg13569431  | TJP3                          | 5.43E-06          | 5.43E-06             | 0.058852           | -16.9919                     | T down vs N                            | 44.429  | 75.1579   | 27.0663    | 1         |
| cg13570090  | DOCK6                         | 0.00068206        | 0.000682056          | 0.208183           | -4.80346                     | T down vs N                            | 17.619  | 23.0672   | 20.9476    | 1         |
| cg13572892  | LHX6;LHX6                     | 2.40E-06          | 2.40E-06             | 0.234023           | -4.27309                     | T down vs N                            | 50.781  | 19.7559   | 6.22468    | 1         |
| cg13574390  | NTRK1;INSRR                   | 0.00103754        | 0.00103754           | 12.8605            | 12.8605                      | T up vs N                              | 16.44   | 57.5083   | 52.4715    | 1         |
| cg13574488  | EMX2;EMX2                     | 0.00021519        | 0.000215192          | 0.196104           | -5.09933                     | T down vs N                            | 22.611  | 24.8577   | 17.5902    | 1         |
| cg13579205  | MAN2A2                        | 0.00019316        | 0.000193163          | 3.76199            | 3.76199                      | T up vs N                              | 23.117  | 16.4422   | 11.3804    | 1         |
| cg13580286  | TNFRSF10B;TNFRSF10B;TNFRSF10B | 7.98E-06          | 7.98E-06             | 0.293249           | -3.41007                     | T down vs N                            | 41.637  | 14.0949   | 5.41626    | 1         |
| cg13580382  | ANAPC2                        | 0.00079219        | 0.00079219           | 0.31804            | -3.14426                     | T down vs N                            | 17.024  | 12.2917   | 11.5525    | 1         |
| cg13581859  | HLA-DPB1                      | 0.00632414        | 0.00632414           | 3.03628            | 3.03628                      | T up vs N                              | 9.8607  | 11.5532   | 18.7462    | 1         |
| cg13581974  | UBXN2B                        | 0.00336104        | 0.00336104           | 0.264567           | -3.77976                     | T down vs N                            | 11.836  | 16.5593   | 22.3845    | 1         |

| Probeset ID                                                                                          | UCSC_REFGENE_NAME                         | p-value<br>(Type) | p-value (T vs.<br>N) | Ratio (T<br>vs. N) | Fold-<br>Change (T<br>vs. N) | Fold-Change (T vs.<br>N) (Description) | F(Type) | SS (Type) | SS (Error) | F (Error) |
|------------------------------------------------------------------------------------------------------|-------------------------------------------|-------------------|----------------------|--------------------|------------------------------|----------------------------------------|---------|-----------|------------|-----------|
| cg13586696                                                                                           | C2orf31                                   | 2.81E-05          | 2.81E-05             | 0.226809           | -4.40899                     | T down vs N                            | 33.417  | 20.6168   | 9.87134    | 1         |
| cg13586987                                                                                           | GMPR                                      | 6.76E-07          | 6.76E-07             | 0.278098           | -3.59585                     | T down vs N                            | 62.072  | 15.3403   | 3.95416    | 1         |
| cg13588086                                                                                           | GLDC                                      | 2.19E-05          | 2.19E-05             | 0.332101           | -3.01114                     | T down vs N                            | 34.961  | 11.3808   | 5.20853    | 1         |
| cg13588954                                                                                           | OPA3;OPA3                                 | 7.21E-06          | 7.21E-06             | 3.2608             | 3.2608                       | T up vs N                              | 42.364  | 13.0851   | 4.94199    | 1         |
| cg13590228                                                                                           | SIAH2                                     | 3.02E-05          | 3.02E-05             | 0.249377           | -4.00999                     | T down vs N                            | 33      | 18.0648   | 8.75884    | 1         |
| cg13590475                                                                                           | RPS12;SNORD100;SNORA33                    | 0.00577543        | 0.00577543           | 0.33298            | -3.00318                     | T down vs N                            | 10.134  | 11.3263   | 17.8822    | 1         |
| cg13591848                                                                                           | SFXN3;PDZD7                               | 5.66E-05          | 5.66E-05             | 5.47037            | 5.47037                      | T up vs N                              | 29.389  | 27.0474   | 14.7252    | 1         |
| PCDHA6;PCDHA2;PCDHA1;PCDHA9;PCDHA7;PCDHA1;PCDHA6;PCDHA10;PCDHA5;PCDHA3;PCDHA4;PCDHA10;PAX6;PAX6;PAX6 |                                           |                   |                      |                    |                              |                                        |         |           |            |           |
| cg13592931                                                                                           | HAS5;PCDHA3;PCDHA4;PCDHA10;PAX6;PAX6;PAX6 | 3.19E-05          | 3.19E-05             | 5.37081            | 5.37081                      | T up vs N                              | 32.673  | 26.4658   | 12.9603    | 1         |
| cg13596833                                                                                           | PAX6;PAX6;PAX6                            | 2.83E-05          | 2.83E-05             | 9.45604            | 9.45604                      | T up vs N                              | 33.382  | 47.2752   | 22.6594    | 1         |
| cg13597422                                                                                           | HARS                                      | 0.00049223        | 0.000492233          | 0.32719            | -3.05633                     | T down vs N                            | 18.956  | 11.6905   | 9.86739    | 1         |
| cg13599020                                                                                           | SAMD3                                     | 0.00013639        | 0.000136385          | 0.250314           | -3.99499                     | T down vs N                            | 24.796  | 17.9675   | 11.5939    | 1         |
| cg13599248                                                                                           | SLC17A5                                   | 0.00020301        | 0.000203012          | 0.207725           | -4.81405                     | T down vs N                            | 22.883  | 23.1319   | 16.1743    | 1         |
| cg13599835                                                                                           | ATP11A;ATP11A                             | 0.0020482         | 0.0020482            | 0.330733           | -3.02359                     | T down vs N                            | 13.505  | 11.4662   | 13.5849    | 1         |
| cg13600227                                                                                           | MIR521-1                                  | 3.66E-06          | 3.66E-06             | 0.242031           | -4.13171                     | T down vs N                            | 47.429  | 18.8511   | 6.3594     | 1         |
| cg13600632                                                                                           | FAM125B                                   | 2.60E-06          | 2.60E-06             | 0.151488           | -6.60117                     | T down vs N                            | 50.14   | 33.3595   | 10.6451    | 1         |
| cg13600755                                                                                           | LDHAL6B;LDHAL6B;MYO1E                     | 0.00591486        | 0.00591486           | 0.263692           | -3.7923                      | T down vs N                            | 10.062  | 16.6419   | 26.4631    | 1         |
| cg13601096                                                                                           | DPH3;DPH3                                 | 0.00168353        | 0.00168353           | 0.250627           | -3.99                        | T down vs N                            | 14.196  | 17.935    | 20.2144    | 1         |
| cg13601309                                                                                           | CTDP1;CTDP1                               | 7.61E-05          | 7.61E-05             | 0.286559           | -3.48969                     | T down vs N                            | 27.785  | 14.6302   | 8.4247     | 1         |
| cg13601855                                                                                           | TMEM37                                    | 0.00042977        | 0.000429765          | 3.39721            | 3.39721                      | T up vs N                              | 19.529  | 14.0082   | 11.4766    | 1         |
| cg13602406                                                                                           | ZNF479                                    | 0.00055856        | 0.000558561          | 0.223991           | -4.46446                     | T down vs N                            | 18.431  | 20.9658   | 18.2002    | 1         |
| cg13603332                                                                                           | SLC44A1                                   | 0.00051191        | 0.000511905          | 0.287729           | -3.4755                      | T down vs N                            | 18.793  | 14.535    | 12.3751    | 1         |
| cg13606991                                                                                           | RNASEL                                    | 1.43E-05          | 1.43E-05             | 0.326376           | -3.06395                     | T down vs N                            | 37.685  | 11.7427   | 4.98563    | 1         |
| cg13607205                                                                                           | AKT1S1;AKT1S1;AKT1S1                      | 0.00254386        | 0.00254386           | 0.252711           | -3.95709                     | T down vs N                            | 12.761  | 17.721    | 22.2185    | 1         |
| cg13610659                                                                                           | OBFC2B;SLC39A5                            | 0.00436188        | 0.00436188           | 0.279059           | -3.58347                     | T down vs N                            | 11.001  | 15.2577   | 22.1903    | 1         |
| cg13611432                                                                                           | SPP2                                      | 7.51E-05          | 7.51E-05             | 0.321872           | -3.10683                     | T down vs N                            | 27.855  | 12.036    | 6.91364    | 1         |
| cg13611822                                                                                           | NXPH1                                     | 3.27E-06          | 3.27E-06             | 14.13              | 14.13                        | T up vs N                              | 48.306  | 65.6896   | 21.7578    | 1         |
| PHYHD1;PHYHD1;PHYHD1;PHYHD1;P                                                                        |                                           |                   |                      |                    |                              |                                        |         |           |            |           |
| cg13613439                                                                                           | HYHD1                                     | 0.0001906         | 0.000190601          | 0.252337           | -3.96296                     | T down vs N                            | 23.18   | 17.7592   | 12.2585    | 1         |
| cg13613965                                                                                           | DNM1;DNM1                                 | 0.00092552        | 0.000925524          | 6.57198            | 6.57198                      | T up vs N                              | 16.417  | 33.203    | 32.3588    | 1         |
| cg13614181                                                                                           | C13orf15                                  | 0.00051093        | 0.000510932          | 4.52368            | 4.52368                      | T up vs N                              | 18.801  | 21.3367   | 18.1584    | 1         |
| cg13615027                                                                                           | VPS13B;VPS13B                             | 5.83E-05          | 5.83E-05             | 0.324605           | -3.08066                     | T down vs N                            | 29.225  | 11.8571   | 6.49149    | 1         |
| cg13615100                                                                                           | TRPM1                                     | 9.55E-06          | 9.55E-06             | 0.231209           | -4.32508                     | T down vs N                            | 40.387  | 20.0863   | 7.95759    | 1         |
| SNORD115-15;SNORD115-                                                                                |                                           |                   |                      |                    |                              |                                        |         |           |            |           |
| cg13615402                                                                                           | 21;SNORD115-30                            | 2.74E-05          | 2.74E-05             | 0.179634           | -5.56687                     | T down vs N                            | 33.565  | 27.6069   | 13.1598    | 1         |
| cg13615592                                                                                           | ALDH1A3                                   | 0.00020523        | 0.000205231          | 11.3633            | 11.3633                      | T up vs N                              | 22.832  | 55.3238   | 38.7698    | 1         |
| cg13615963                                                                                           | CCR6;CCR6;CCR6                            | 1.23E-05          | 1.23E-05             | 0.310356           | -3.2221                      | T down vs N                            | 38.684  | 12.8221   | 5.30329    | 1         |
| cg13617155                                                                                           | CD86;CD86                                 | 0.0001044         | 0.000104403          | 0.329517           | -3.03474                     | T down vs N                            | 26.136  | 11.5427   | 7.06611    | 1         |
| cg13617603                                                                                           | PPP1R2P1                                  | 7.37E-05          | 7.37E-05             | 0.328692           | -3.04236                     | T down vs N                            | 27.95   | 11.5949   | 6.63743    | 1         |
| cg13619074                                                                                           | DMRT1                                     | 1.48E-05          | 1.48E-05             | 0.195664           | -5.11079                     | T down vs N                            | 37.466  | 24.9263   | 10.6448    | 1         |
| cg13620705                                                                                           | LLGL2;LLGL2;LLGL2                         | 7.20E-06          | 7.20E-06             | 0.255391           | -3.91556                     | T down vs N                            | 42.376  | 17.4502   | 6.5888     | 1         |
| cg13620799                                                                                           | LNK1;LNK1;LNK1                            | 0.00111975        | 0.00111975           | 0.25658            | -3.89742                     | T down vs N                            | 15.691  | 17.3316   | 17.6727    | 1         |
| cg13621396                                                                                           | STIM2;STIM2;STIM2                         | 0.00020763        | 0.000207627          | 0.226301           | -4.4189                      | T down vs N                            | 22.777  | 20.6792   | 14.5261    | 1         |
| cg13623052                                                                                           | MTG1                                      | 0.00137118        | 0.00137118           | 0.28612            | -3.49503                     | T down vs N                            | 14.939  | 14.6661   | 15.7083    | 1         |
| cg13623135                                                                                           | FOXH1                                     | 0.00119183        | 0.00119183           | 4.99627            | 4.99627                      | T up vs N                              | 15.457  | 24.2386   | 25.0897    | 1         |
| cg13626676                                                                                           | RALGAPA2                                  | 0.00016649        | 0.000166493          | 0.258844           | -3.86332                     | T down vs N                            | 23.824  | 17.1085   | 11.4898    | 1         |
| cg13627714                                                                                           | MCART2                                    | 0.00027926        | 0.000279259          | 0.211785           | -4.72177                     | T down vs N                            | 21.418  | 22.5656   | 16.8577    | 1         |
| cg13627726                                                                                           | CEP170L                                   | 0.00154836        | 0.00154836           | 0.2698             | -3.70644                     | T down vs N                            | 14.496  | 16.0751   | 17.7425    | 1         |
| cg13628901                                                                                           | SIN3B                                     | 0.00027879        | 0.000278793          | 0.289516           | -3.45404                     | T down vs N                            | 21.425  | 14.3908   | 10.7469    | 1         |
| cg13629162                                                                                           | KIAA1522                                  | 9.37E-05          | 9.37E-05             | 0.317326           | -3.15134                     | T down vs N                            | 26.69   | 12.34     | 7.39745    | 1         |
| cg13630043                                                                                           | EMX2;EMX2                                 | 7.75E-06          | 7.75E-06             | 0.149552           | -6.68663                     | T down vs N                            | 41.849  | 33.8157   | 12.9287    | 1         |
| cg13636189                                                                                           | NR4A3;NR4A3;NR4A3                         | 1.71E-05          | 1.71E-05             | 6.97998            | 6.97998                      | T up vs N                              | 36.497  | 35.3612   | 15.5021    | 1         |
| cg13639451                                                                                           | WFIKKN2                                   | 0.00586048        | 0.00586048           | 0.245056           | -4.08071                     | T down vs N                            | 10.09   | 18.5225   | 29.3719    | 1         |
| cg13642872                                                                                           | ACSBG1                                    | 0.00039145        | 0.000391445          | 0.282611           | -3.53843                     | T down vs N                            | 19.93   | 14.9568   | 12.0077    | 1         |
| cg13644239                                                                                           | TRIP13;BRD9;BRD9;TRIP13;BRD9              | 9.09E-05          | 9.09E-05             | 0.282968           | -3.53397                     | T down vs N                            | 26.847  | 14.9269   | 8.89614    | 1         |
| cg13645481                                                                                           | NLRP4                                     | 1.31E-05          | 1.31E-05             | 0.236635           | -4.22592                     | T down vs N                            | 38.271  | 19.4551   | 8.13362    | 1         |
| cg13647601                                                                                           | TMEM143                                   | 0.00123384        | 0.00123384           | 3.20127            | 3.20127                      | T up vs N                              | 15.328  | 12.6803   | 13.2361    | 1         |
| CDC20B;MIR449A;CDC20B;CDC20B                                                                         |                                           |                   |                      |                    |                              |                                        |         |           |            |           |
| cg13650580                                                                                           | CDC20B;MIR449A;CDC20B;CDC20B              | 1.50E-06          | 1.50E-06             | 0.091893           | -10.8822                     | T down vs N                            | 54.772  | 53.3719   | 15.5909    | 1         |
| cg13650654                                                                                           | NLRP7;NLRP7;NLRP7                         | 2.46E-05          | 2.46E-05             | 0.196001           | -5.10201                     | T down vs N                            | 34.236  | 24.8738   | 11.6245    | 1         |
| cg13651483                                                                                           | PLA2G4C;PLA2G4C;PLA2G4C                   | 0.00058927        | 0.00058927           | 0.247073           | -4.04739                     | T down vs N                            | 18.212  | 18.3071   | 16.084     | 1         |
| cg13652536                                                                                           | OR1L3                                     | 3.29E-05          | 3.29E-05             | 0.18591            | -5.37895                     | T down vs N                            | 32.484  | 26.5136   | 13.0591    | 1         |
| cg13652795                                                                                           | BCOR;BCOR                                 | 0.00012198        | 0.000121979          | 0.283898           | -3.52239                     | T down vs N                            | 25.35   | 14.8495   | 9.37232    | 1         |
| cg13653173                                                                                           | PPP1R2P1                                  | 5.62E-05          | 5.62E-05             | 0.239345           | -4.17807                     | T down vs N                            | 30.737  | 18.0224   | 8.79507    | 1         |
| cg13655303                                                                                           | PCK1                                      | 1.98E-06          | 1.98E-06             | 0.223749           | -4.46929                     | T down vs N                            | 52.413  | 20.9961   | 6.40948    | 1         |
| cg13656878                                                                                           | PAPPA                                     | 3.96E-06          | 3.96E-06             | 0.133872           | -7.46984                     | T down vs N                            | 46.809  | 37.8731   | 12.9456    | 1         |
| cg13661350                                                                                           | PRB4                                      | 3.94E-06          | 3.94E-06             | 0.230747           | -4.33376                     | T down vs N                            | 46.859  | 20.1413   | 6.87724    | 1         |
| MAGEA4;MAGEA4;MAGEA4;MAGEA4                                                                          |                                           |                   |                      |                    |                              |                                        |         |           |            |           |
| cg13661446                                                                                           | MAGEA4;MAGEA4;MAGEA4;MAGEA4               | 4.76E-06          | 4.76E-06             | 0.23908            | -4.18269                     | T down vs N                            | 45.411  | 19.1785   | 6.75725    | 1         |
| cg13663644                                                                                           | DMRT3                                     | 7.06E-05          | 7.06E-05             | 0.155342           | -6.43742                     | T down vs N                            | 28.184  | 32.4773   | 18.4376    | 1         |

| Probeset ID | UCSC_REFGENE_NAME              | p-value<br>(Type) | p-value (T vs.<br>N) | Ratio (T<br>vs. N) | Fold-<br>Change (T<br>vs. N) | Fold-Change (T vs.<br>N) (Description) | F(Type) | SS (Type) | SS (Error) | F (Error) |
|-------------|--------------------------------|-------------------|----------------------|--------------------|------------------------------|----------------------------------------|---------|-----------|------------|-----------|
| cg13664919  | BRD9;BRD9;BRD9                 | 0.0004235         | 0.000423496          | 4.51049            | 4.51049                      | T up vs N                              | 19.592  | 21.2542   | 17.3575    | 1         |
| cg13665850  | TNXB;TNXB                      | 6.10E-07          | 6.10E-07             | 0.326015           | -3.06734                     | T down vs N                            | 63.062  | 11.7659   | 2.98523    | 1         |
| cg13667243  | ADAM19                         | 0.00222706        | 0.00222706           | 9.23591            | 9.23591                      | T up vs N                              | 13.215  | 46.2892   | 5.0443     | 1         |
| cg13671198  | PBX3;PBX3;PBX3;PBX3            | 1.22E-06          | 1.22E-06             | 0.137943           | -7.24936                     | T down vs N                            | 56.621  | 36.753    | 10.3858    | 1         |
| cg13672736  | NTNG2                          | 0.00022364        | 0.000223639          | 0.142299           | -7.02747                     | T down vs N                            | 22.432  | 35.6085   | 25.3986    | 1         |
| cg13673514  | BEGAIN;BEGAIN                  | 0.00185533        | 0.00185533           | 3.0748             | 3.0748                       | T up vs N                              | 13.851  | 11.817    | 13.6503    | 1         |
| cg13674249  | UBQLN1;UBQLN1                  | 0.00024675        | 0.000246746          | 0.168461           | -5.93609                     | T down vs N                            | 21.979  | 29.7108   | 21.6283    | 1         |
| cg13674558  | UBE2CBP;DOPEY1                 | 3.88E-06          | 3.88E-06             | 0.241974           | -4.13268                     | T down vs N                            | 46.961  | 18.8573   | 6.42484    | 1         |
| cg13674705  | FAM129A                        | 5.88E-05          | 5.88E-05             | 0.318984           | -3.13496                     | T down vs N                            | 29.174  | 12.2282   | 6.70626    | 1         |
| cg13675753  | KCNJ1;KCNJ1;KCNJ1;KCNJ1        | 0.00192071        | 0.00192071           | 0.264573           | -3.77968                     | T down vs N                            | 14.082  | 15.5848   | 16.6007    | 1         |
| cg13675849  | TRPV5                          | 1.12E-05          | 1.12E-05             | 0.206109           | -4.85179                     | T down vs N                            | 39.321  | 23.3624   | 9.50626    | 1         |
| cg13677770  | TLR7                           | 1.72E-05          | 1.72E-05             | 0.244016           | -4.0981                      | T down vs N                            | 36.483  | 18.6347   | 8.1725     | 1         |
| cg13678551  | EPB41L4B;EPB41L4B              | 1.58E-05          | 1.58E-05             | 0.297415           | -3.3623                      | T down vs N                            | 37.024  | 13.7726   | 5.95179    | 1         |
| cg13679311  | ERB83                          | 5.04E-05          | 5.04E-05             | 0.299686           | -3.33682                     | T down vs N                            | 30.033  | 13.6003   | 7.24553    | 1         |
| cg13679778  | GPX5;GPX5                      | 1.19E-05          | 1.19E-05             | 0.221669           | -4.51123                     | T down vs N                            | 38.867  | 21.2589   | 8.75154    | 1         |
| cg13683194  | C9orf125                       | 6.58E-06          | 6.58E-06             | 0.292044           | -3.42414                     | T down vs N                            | 43.018  | 14.1897   | 5.27769    | 1         |
| cg13686384  | DMRT3                          | 3.98E-06          | 3.98E-06             | 0.162921           | -6.13794                     | T down vs N                            | 46.77   | 30.8369   | 10.5493    | 1         |
| cg13686751  | FOXDL3;FOXDL4L6                | 0.00073722        | 0.000737216          | 3.32912            | 3.32912                      | T up vs N                              | 17.308  | 13.5482   | 12.5241    | 1         |
| cg13686857  | NTM;NTM;NTM;NTM                | 0.00077944        | 0.000779437          | 0.317835           | -3.14629                     | T down vs N                            | 17.088  | 12.3055   | 11.5222    | 1         |
| cg13688312  | NOS1AP;NOS1AP;NOS1AP           | 0.00128619        | 0.00128619           | 0.307974           | -3.24703                     | T down vs N                            | 15.174  | 12.9915   | 13.6987    | 1         |
| cg13688966  | TM4SF4                         | 6.03E-05          | 6.03E-05             | 0.216202           | -4.62531                     | T down vs N                            | 29.039  | 21.9695   | 12.1047    | 1         |
| cg13689560  | C19orf36;MOBK2LA;C19orf36      | 7.64E-06          | 7.64E-06             | 0.079815           | -12.529                      | T down vs N                            | 41.945  | 59.8594   | 22.8335    | 1         |
| cg13690126  | CNKSR1;CNKSR1                  | 1.62E-05          | 1.62E-05             | 0.239948           | -4.16758                     | T down vs N                            | 36.868  | 19.0815   | 8.28101    | 1         |
| cg13690280  | PALM2;PALM2-AKAP2;PALM2;PALM2- |                   |                      |                    |                              |                                        |         |           |            |           |
|             | AKAP2                          | 0.00122081        | 0.00122081           | 0.324843           | -3.07841                     | T down vs N                            | 15.368  | 11.8417   | 12.3289    | 1         |
|             | PPP1R16B                       | 0.00032549        | 0.000325485          | 4.35455            | 4.35455                      | T up vs N                              | 20.735  | 20.273    | 15.6437    | 1         |
|             | SAMD11                         | 0.00055532        | 0.000555317          | 5.98298            | 5.98298                      | T up vs N                              | 18.455  | 29.9739   | 25.9862    | 1         |
|             | BHMT                           | 3.77E-05          | 3.77E-05             | 3.53504            | 3.53504                      | T up vs N                              | 31.69   | 14.9341   | 7.54019    | 1         |
|             | PRKAG1;PRKAG1                  | 7.95E-05          | 7.95E-05             | 0.231175           | -4.32572                     | T down vs N                            | 27.554  | 20.0903   | 11.6661    | 1         |
|             | DIRA53                         | 0.00095445        | 0.000954449          | 3.37527            | 3.37527                      | T up vs N                              | 16.299  | 13.8601   | 13.606     | 1         |
|             | C13orf29                       | 0.00045411        | 0.000454109          | 0.307716           | -3.24975                     | T down vs N                            | 19.296  | 13        |            |           |

| Probeset ID | UCSC_REFGENE_NAME                                                                               | p-value<br>(Type) | p-value (T vs.<br>N) | Ratio (T<br>vs. N) | Fold-<br>Change (T<br>vs. N) | Fold-Change (T vs.<br>N) (Description) | F(Type) | SS (Type) | SS (Error) | F (Error) |
|-------------|-------------------------------------------------------------------------------------------------|-------------------|----------------------|--------------------|------------------------------|----------------------------------------|---------|-----------|------------|-----------|
| cg13749420  | CPLX4                                                                                           | 4.49E-06          | 4.49E-06             | 0.286727           | -3.48763                     | T down vs N                            | 45.854  | 14.6164   | 5.1002     | 1         |
| cg13749927  | DDB2                                                                                            | 0.00446828        | 0.00446828           | 0.308957           | -3.23669                     | T down vs N                            | 10.926  | 12.9213   | 18.9226    | 1         |
| cg13751113  | AMICA1;AMICA1                                                                                   | 0.00092793        | 0.000927926          | 0.23783            | -4.20469                     | T down vs N                            | 16.407  | 19.3193   | 18.8396    | 1         |
| cg13751548  | PAX5                                                                                            | 0.00192179        | 0.00192179           | 0.27389            | -3.6511                      | T down vs N                            | 13.727  | 15.708    | 18.3086    | 1         |
| cg13752933  | DAPK1                                                                                           | 0.00063682        | 0.000636815          | 0.296588           | -3.37168                     | T down vs N                            | 17.896  | 13.8359   | 12.3702    | 1         |
| cg13753550  | PYCR1;PYCR1                                                                                     | 0.00082012        | 0.000820116          | 0.298166           | -3.35384                     | T down vs N                            | 16.888  | 13.7154   | 12.9944    | 1         |
| cg13754720  | PTCH1;PTCH1                                                                                     | 4.63E-05          | 4.63E-05             | 0.241721           | -4.13701                     | T down vs N                            | 30.509  | 18.8852   | 9.90403    | 1         |
| cg13756251  | COL5A1                                                                                          | 0.00391127        | 0.00391127           | 0.25239            | -3.96213                     | T down vs N                            | 11.347  | 17.7538   | 25.0338    | 1         |
| cg13757194  | MIR548H4;NOX5;SPESP1                                                                            | 0.0028076         | 0.0028076            | 0.286618           | -3.48897                     | T down vs N                            | 12.43   | 14.6254   | 18.8263    | 1         |
| cg13757826  | CORO6                                                                                           | 0.00063422        | 0.000634217          | 26.7021            | 26.7021                      | T up vs N                              | 17.912  | 101.056   | 90.2678    | 1         |
| cg13758331  | BCL2L11;BCL2L11                                                                                 | 0.00081206        | 0.000812062          | 0.265189           | -3.7709                      | T down vs N                            | 16.926  | 16.5009   | 15.5978    | 1         |
| cg13759674  | GRIN1;GRIN1;GRIN1                                                                               | 0.00290625        | 0.00290625           | 22.9471            | 22.9471                      | T up vs N                              | 12.315  | 91.9466   | 119.462    | 1         |
| cg13762244  | CAPN1                                                                                           | 2.35E-06          | 2.35E-06             | 6.22289            | 6.22289                      | T up vs N                              | 50.962  | 31.3058   | 9.82884    | 1         |
| cg13762704  | LILRB1;LILRB1;LILRB1;LILRB1                                                                     | 2.39E-05          | 2.39E-05             | 0.221151           | -4.5218                      | T down vs N                            | 34.396  | 21.325    | 9.91985    | 1         |
| cg13766687  | IL17RD                                                                                          | 0.00150453        | 0.00150453           | 0.288984           | -3.4604                      | T down vs N                            | 14.6    | 14.4336   | 15.8175    | 1         |
| cg13771313  | ATG16L2                                                                                         | 0.00183386        | 0.00183386           | 3.07677            | 3.07677                      | T up vs N                              | 13.892  | 11.8304   | 13.6254    | 1         |
| cg13772174  | CNN1                                                                                            | 0.00024325        | 0.000243248          | 0.245362           | -4.07561                     | T down vs N                            | 22.045  | 18.4896   | 13.4198    | 1         |
| cg13772742  | NR2F2;NR2F2;NR2F2;NR2F2                                                                         | 0.00032402        | 0.000324019          | 0.320233           | -3.12272                     | T down vs N                            | 20.755  | 12.1446   | 9.36245    | 1         |
| cg13775533  | PCDH19;PCDH19                                                                                   | 0.00585467        | 0.00585467           | 6.29959            | 6.29959                      | T up vs N                              | 10.093  | 31.7268   | 50.2956    | 1         |
| cg13776285  | NR2E1                                                                                           | 0.00287991        | 0.00287991           | 0.242204           | -4.12875                     | T down vs N                            | 12.345  | 18.8321   | 24.4076    | 1         |
| cg13777287  | CNKS3                                                                                           | 6.48E-07          | 6.48E-07             | 0.220444           | -4.5363                      | T down vs N                            | 62.485  | 21.4156   | 5.48371    | 1         |
| cg13777668  | ACTN1;ACTN1;ACTN1                                                                               | 0.00016943        | 0.000169431          | 0.293558           | -3.40648                     | T down vs N                            | 23.74   | 14.0707   | 9.48306    | 1         |
| cg13777681  | DPP10;DPP10                                                                                     | 0.00252952        | 0.00252952           | 3.40244            | 3.40244                      | T up vs N                              | 17.122  | 7.94376   | 4.17549    | 1         |
| cg13778815  | FRG2                                                                                            | 2.21E-06          | 2.21E-06             | 0.189642           | -5.27308                     | T down vs N                            | 51.482  | 25.8908   | 8.04654    | 1         |
| cg13780945  | RPGR;RPGR                                                                                       | 0.00044123        | 0.000441225          | 0.210592           | -4.74852                     | T down vs N                            | 19.417  | 22.7302   | 18.7297    | 1         |
| cg13783238  | SMC4;MIR15B;SMC4;MIR16-2<br>FAM164C;FAM164C;FAM164C;FAM16<br>4C                                 | 8.81E-08          | 8.81E-08             | 0.092076           | -10.8606                     | T down vs N                            | 84.418  | 53.2832   | 10.099     | 1         |
| cg13783444  | 4C                                                                                              | 0.00193533        | 0.00193533           | 3.49217            | 3.49217                      | T up vs N                              | 13.703  | 14.6469   | 17.1025    | 1         |
| cg13783957  | AMBP                                                                                            | 9.22E-05          | 9.22E-05             | 0.227371           | -4.39809                     | T down vs N                            | 26.776  | 20.5481   | 12.2787    | 1         |
| cg13784235  | NR2E1                                                                                           | 0.0003953         | 0.000395303          | 0.218315           | -4.58053                     | T down vs N                            | 19.887  | 21.6913   | 17.4513    | 1         |
| cg13784276  | QSOX2                                                                                           | 0.00040601        | 0.000406011          | 0.264126           | -3.78608                     | T down vs N                            | 19.773  | 16.601    | 13.4336    | 1         |
| cg13784557  | HCP5                                                                                            | 0.00063137        | 0.000631366          | 3.71037            | 3.71037                      | T up vs N                              | 17.931  | 16.1011   | 14.3675    | 1         |
| cg13786023  | FAM163A                                                                                         | 1.41E-05          | 1.41E-05             | 0.245723           | -4.06962                     | T down vs N                            | 37.745  | 18.4509   | 7.8212     | 1         |
| cg13786801  | TACSTD2                                                                                         | 1.90E-05          | 1.90E-05             | 13.5676            | 13.5676                      | T up vs N                              | 35.831  | 63.6901   | 28.44      | 1         |
| cg13787768  | COL5A1                                                                                          | 0.00170816        | 0.00170816           | 0.216705           | -4.61456                     | T down vs N                            | 14.144  | 21.9028   | 24.7769    | 1         |
| cg13788685  | SDHC;SDHC;LOC642502;SDHC;SDHC<br>BLCAP;BLCAP;BLCAP;BLCAP;NNAT;NN<br>AT;BLCAP                    | 0.00021741        | 0.000217405          | 0.143658           | -6.96098                     | T down vs N                            | 22.563  | 35.2621   | 25.0054    | 1         |
| cg13790727  | AT;BLCAP                                                                                        | 0.0001877         | 0.000187696          | 5.00887            | 5.00887                      | T up vs N                              | 23.252  | 24.3146   | 16.7309    | 1         |
| cg13791092  | PSMF1;PSMF1                                                                                     | 2.67E-05          | 2.67E-05             | 0.228588           | -4.37468                     | T down vs N                            | 33.735  | 20.4003   | 9.6756     | 1         |
| cg13792444  | ASTN2;ASTN2;ASTN2;ASTN2                                                                         | 0.00018453        | 0.000184531          | 0.218029           | -4.58654                     | T down vs N                            | 23.333  | 21.7287   | 14.8999    | 1         |
| cg13793157  | KLK4                                                                                            | 0.00111818        | 0.00111818           | 0.310157           | -3.22417                     | T down vs N                            | 15.697  | 12.8362   | 13.0844    | 1         |
| cg13793854  | LYPD6                                                                                           | 1.98E-05          | 1.98E-05             | 0.248053           | -4.0314                      | T down vs N                            | 35.581  | 18.2036   | 8.18583    | 1         |
| cg13794588  | FCN2;FCN2                                                                                       | 2.15E-05          | 2.15E-05             | 0.279535           | -3.57737                     | T down vs N                            | 35.049  | 15.217    | 6.94662    | 1         |
| cg13799242  | HEY2                                                                                            | 2.77E-05          | 2.77E-05             | 0.212298           | -4.71037                     | T down vs N                            | 33.513  | 22.4954   | 10.74      | 1         |
| cg13799986  | TMEM141                                                                                         | 0.00568732        | 0.00568732           | 0.332185           | -3.01037                     | T down vs N                            | 10.181  | 11.3756   | 17.8777    | 1         |
| cg13800491  | FLT1;FLT1;FLT1;FLT1                                                                             | 3.90E-05          | 3.90E-05             | 0.190234           | -5.25668                     | T down vs N                            | 31.482  | 25.7939   | 13.109     | 1         |
| cg13802527  | C9orf80                                                                                         | 1.41E-05          | 1.41E-05             | 0.227847           | -4.38892                     | T down vs N                            | 37.743  | 20.4902   | 8.68621    | 1         |
| cg13802666  | MYOC                                                                                            | 6.40E-06          | 6.40E-06             | 0.290455           | -3.44287                     | T down vs N                            | 43.221  | 14.3157   | 5.29951    | 1         |
| cg13802942  | STOM;STOM                                                                                       | 1.37E-05          | 1.37E-05             | 0.178002           | -5.6179                      | T down vs N                            | 37.97   | 27.9011   | 11.7572    | 1         |
| cg13804182  | FLOT1;IER3                                                                                      | 0.00044895        | 0.000448954          | 7.71429            | 7.71429                      | T up vs N                              | 19.344  | 39.0958   | 32.3376    | 1         |
| cg13806767  | PSMD14                                                                                          | 6.95E-07          | 6.95E-07             | 0.087445           | -11.4358                     | T down vs N                            | 61.799  | 55.6139   | 14.3987    | 1         |
| cg13808058  | ATP2B4;ATP2B4                                                                                   | 9.00E-05          | 9.00E-05             | 0.15866            | -6.30278                     | T down vs N                            | 26.9    | 31.7443   | 18.8815    | 1         |
| cg13808848  | AGAP1;AGAP1                                                                                     | 0.00019536        | 0.000195363          | 3.15485            | 3.15485                      | T up vs N                              | 23.063  | 12.364    | 8.57745    | 1         |
| cg13809026  | ZNF735                                                                                          | 0.0044438         | 0.0044438            | 0.211178           | -4.73534                     | T down vs N                            | 10.943  | 22.6492   | 33.1163    | 1         |
| cg13809236  | MAPK8IP1                                                                                        | 0.00015198        | 0.000151975          | 3.27361            | 3.27361                      | T up vs N                              | 24.266  | 13.172    | 8.68522    | 1         |
| cg13812291  | IGF1R                                                                                           | 0.00065014        | 0.000650139          | 0.303458           | -3.29535                     | T down vs N                            | 17.812  | 13.3195   | 11.9645    | 1         |
| cg13812570  | SPANXN1                                                                                         | 9.81E-05          | 9.81E-05             | 0.285419           | -3.50362                     | T down vs N                            | 26.456  | 14.7237   | 8.90442    | 1         |
| cg13813086  | PBX3;PBX3;PBX3;PBX3                                                                             | 1.00E-08          | 1.00E-08             | 0.167074           | -5.98538                     | T down vs N                            | 115.42  | 29.9873   | 4.15697    | 1         |
| cg13816428  | ORSAU1                                                                                          | 0.00067222        | 0.000672216          | 0.267423           | -3.73939                     | T down vs N                            | 17.677  | 16.9293   | 14.747     | 1         |
| cg13816734  | GPC5                                                                                            | 0.00147388        | 0.00147388           | 0.280502           | -3.56504                     | T down vs N                            | 14.675  | 15.1346   | 16.5013    | 1         |
| cg13817265  | SOX5                                                                                            | 3.08E-05          | 3.08E-05             | 0.249957           | -4.00069                     | T down vs N                            | 32.867  | 18.0045   | 8.76488    | 1         |
| cg13818708  | HCG18;HCG18                                                                                     | 0.00092611        | 0.000926108          | 0.303293           | -3.29714                     | T down vs N                            | 16.415  | 13.3316   | 12.9946    | 1         |
| cg13819577  | OR14C36                                                                                         | 0.00017969        | 0.000179692          | 0.179811           | -5.56139                     | T down vs N                            | 23.459  | 27.5752   | 18.8073    | 1         |
| cg13821433  | OTOF                                                                                            | 9.04E-05          | 9.04E-05             | 6.58553            | 6.58553                      | T up vs N                              | 26.88   | 33.2756   | 19.8069    | 1         |
| cg13821972  | C9orf116;C9orf116                                                                               | 0.00053741        | 0.000537413          | 0.231017           | -4.32868                     | T down vs N                            | 18.591  | 20.1091   | 17.3069    | 1         |
| cg13824500  | VTI1A                                                                                           | 0.00136483        | 0.00136483           | 0.218916           | -4.56796                     | T down vs N                            | 14.956  | 21.613    | 23.1225    | 1         |
| cg13825083  | GGT1                                                                                            | 0.00017559        | 0.000175589          | 0.294046           | -3.40083                     | T down vs N                            | 23.569  | 14.0326   | 9.52598    | 1         |
| cg13826459  | SERPINA1;SERPINA1;SERPINA1;SERPIN<br>A1;SERPINA1;SERPINA1;SERPINA1;SER<br>PINA1;SERPINA1;SERPIN | 0.0003493         | 0.000349302          | 0.296846           | -3.36875                     | T down vs N                            | 20.424  | 13.8161   | 10.8233    | 1         |
| cg13826564  | LTBP3;LTBP3;LTBP3                                                                               | 0.00169005        | 0.00169005           | 5.72966            | 5.72966                      | T up vs N                              | 14.182  | 28.5416   | 32.2003    | 1         |

| Probeset ID | UCSC_REFGENE_NAME       | p-value<br>(Type) | p-value (T vs.<br>N) | Ratio (T<br>vs. N) | Fold-<br>Change (T<br>vs. N) | Fold-Change (T vs.<br>N) (Description) | F(Type) | SS (Type) | SS (Error) | F (Error) |
|-------------|-------------------------|-------------------|----------------------|--------------------|------------------------------|----------------------------------------|---------|-----------|------------|-----------|
| cg13826749  | UBASH3A;UBASH3A         | 2.43E-06          | 2.43E-06             | 0.234643           | -4.26179                     | T down vs N                            | 50.688  | 19.6839   | 6.21333    | 1         |
| cg13828097  | HLA-B                   | 0.00370331        | 0.00370331           | 3.5652             | 3.5652                       | T up vs N                              | 11.522  | 15.1357   | 21.0177    | 1         |
| cg13830624  | COL21A1;COL21A1         | 0.00251206        | 0.00251206           | 5.0447             | 5.0447                       | T up vs N                              | 12.804  | 24.5302   | 30.6535    | 1         |
| cg13831723  | PAEP;PAEP               | 0.00032111        | 0.000321113          | 0.294551           | -3.395                       | T down vs N                            | 20.794  | 13.9933   | 10.7669    | 1         |
| cg13832135  | FAM189A1                | 0.00075972        | 0.000759722          | 0.218889           | -4.56853                     | T down vs N                            | 17.189  | 21.6165   | 20.1212    | 1         |
| cg13835670  | GALNTL5;GALNTL5         | 0.00058656        | 0.000586557          | 0.293163           | -3.41107                     | T down vs N                            | 18.231  | 14.1017   | 12.3763    | 1         |
| cg13836098  | HIST1H3E                | 1.05E-05          | 1.05E-05             | 19.2294            | 19.2294                      | T up vs N                              | 39.719  | 81.8653   | 32.9782    | 1         |
| cg13837679  | ALX4                    | 7.56E-05          | 7.56E-05             | 0.265409           | -3.76777                     | T down vs N                            | 27.815  | 16.4803   | 9.48007    | 1         |
| cg13837822  | LOC731789               | 0.00057195        | 0.000571947          | 0.282687           | -3.53748                     | T down vs N                            | 18.334  | 14.9504   | 13.0473    | 1         |
| cg13838014  | PIPSKL1;PIPSKL1         | 7.06E-05          | 7.06E-05             | 0.292789           | -3.41543                     | T down vs N                            | 28.181  | 14.131    | 8.02313    | 1         |
| cg13842421  | GPR133                  | 1.86E-05          | 1.86E-05             | 6.60516            | 6.60516                      | T up vs N                              | 35.985  | 33.3808   | 14.8422    | 1         |
| cg13842648  | IL9                     | 0.00124909        | 0.00124909           | 0.25183            | -3.97093                     | T down vs N                            | 15.283  | 17.8111   | 18.6472    | 1         |
| cg13844474  | NFATC2;NFATC2;NFATC2    | 6.14E-05          | 6.14E-05             | 5.85607            | 5.85607                      | T up vs N                              | 28.943  | 29.2597   | 16.1753    | 1         |
| cg13845105  | RPL6;RPL6               | 0.00313306        | 0.00313306           | 0.247905           | -4.0338                      | T down vs N                            | 12.066  | 18.2192   | 24.1587    | 1         |
| cg13845634  | PPY                     | 2.43E-05          | 2.43E-05             | 0.257625           | -3.88161                     | T down vs N                            | 34.305  | 17.2282   | 8.03522    | 1         |
| cg13846327  | DAOA;DAOA;DAOA          | 0.00109264        | 0.00109264           | 0.313258           | -3.19226                     | T down vs N                            | 15.784  | 12.6189   | 12.7919    | 1         |
| cg13846358  | NTNG2                   | 0.0003661         | 0.000366101          | 0.308623           | -3.2402                      | T down vs N                            | 20.22   | 12.9452   | 10.2437    | 1         |
| cg13848990  | ORSW2                   | 0.00169565        | 0.00169565           | 0.270494           | -3.69694                     | T down vs N                            | 14.17   | 16.0121   | 18.0797    | 1         |
| cg13852084  | HLA-DMA                 | 1.01E-05          | 1.01E-05             | 0.331887           | -3.01308                     | T down vs N                            | 42.173  | 10.7239   | 3.81422    | 1         |
| cg13853186  | DMRT3                   | 0.00171116        | 0.00171116           | 0.185896           | -5.37934                     | T down vs N                            | 14.138  | 26.5159   | 30.0085    | 1         |
| cg13858611  | NRN1                    | 0.00244765        | 0.00244765           | 0.236147           | -4.23465                     | T down vs N                            | 12.892  | 19.5108   | 24.2146    | 1         |
| cg13859208  | FZD10;FZD10             | 1.07E-05          | 1.07E-05             | 0.281023           | -3.55843                     | T down vs N                            | 39.587  | 15.0905   | 6.09914    | 1         |
| cg13859346  | DIP2C                   | 8.28E-05          | 8.28E-05             | 3.31993            | 3.31993                      | T up vs N                              | 27.34   | 13.486    | 7.89238    | 1         |
| cg13859771  | ENTPD7                  | 0.00234469        | 0.00234469           | 0.272968           | -3.66343                     | T down vs N                            | 13.039  | 15.7899   | 19.3764    | 1         |
| cg13859847  | ANKRD34C                | 0.00013591        | 0.00013591           | 0.262511           | -3.80937                     | T down vs N                            | 24.813  | 16.7543   | 10.8036    | 1         |
| cg13859860  | NCOA4;NCOA4;NCOA4       | 0.00119222        | 0.00119222           | 0.280854           | -3.56057                     | T down vs N                            | 15.456  | 15.1048   | 15.6364    | 1         |
| cg13860283  | OR9K2                   | 0.00017058        | 0.000170578          | 0.274533           | -3.64254                     | T down vs N                            | 23.708  | 15.6511   | 10.5626    | 1         |
| cg13861749  | NETO1;NETO1;NETO1       | 1.01E-05          | 1.01E-05             | 0.308637           | -3.24005                     | T down vs N                            | 40.025  | 12.9441   | 5.17441    | 1         |
| cg13863078  | SPCS3                   | 0.00065686        | 0.00065686           | 0.304908           | -3.27968                     | T down vs N                            | 17.771  | 13.2132   | 11.8968    | 1         |
| cg13863153  | KCNJ15;KCNJ15;KCNJ15    | 8.76E-06          | 8.76E-06             | 0.165995           | -6.02429                     | T down vs N                            | 40.987  | 30.2049   | 11.7909    | 1         |
| cg13866093  | GPX5;GPX5               | 0.00020775        | 0.000207747          | 0.267341           | -3.74055                     | T down vs N                            | 22.775  | 16.3006   | 11.4517    | 1         |
| cg13866577  | PDE4B;PDE4B;PDE4B;PDE4B | 9.06E-05          | 9.06E-05             | 0.181321           | -5.51507                     | T down vs N                            | 26.868  | 27.3071   | 16.2616    | 1         |
| cg13868111  | NHEDC1;NHEDC1           | 0.00018751        | 0.000187511          | 0.30158            | -3.31587                     | T down vs N                            | 23.257  | 13.4585   | 9.259      | 1         |
| cg13868773  | BBS9;BBS9;BBS9;BBS9     | 4.83E-08          | 4.83E-08             | 0.298349           | -3.35178                     | T down vs N                            | 92.163  | 13.7014   | 2.37864    | 1         |
| cg13869366  | OR5E1P                  | 2.15E-06          | 2.15E-06             | 0.270259           | -3.70015                     | T down vs N                            | 51.695  | 16.0334   | 4.96247    | 1         |
| cg13871708  | DPCR1                   | 6.30E-06          | 6.30E-06             | 0.318955           | -3.13523                     | T down vs N                            | 43.338  | 12.2301   | 4.51519    | 1         |
| cg13872831  | RASSF1;RASSF1           | 6.32E-05          | 6.32E-05             | 5.45729            | 5.45729                      | T up vs N                              | 28.782  | 26.9713   | 14.9933    | 1         |
| cg13877502  | KANK1;KANK1             | 0.0059465         | 0.0059465            | 0.248262           | -4.02801                     | T down vs N                            | 10.046  | 18.1816   | 28.9578    | 1         |
| cg13877999  | SGK2;SGK2               | 0.0019716         | 0.0019716            | 3.46036            | 3.46036                      | T up vs N                              | 13.638  | 14.4333   | 16.9334    | 1         |
| cg13878677  | IQSEC1                  | 2.63E-05          | 2.63E-05             | 0.218183           | -4.58332                     | T down vs N                            | 33.829  | 21.7086   | 10.2675    | 1         |
| cg13880565  | SLC6A13                 | 3.31E-05          | 3.31E-05             | 0.258057           | -3.87512                     | T down vs N                            | 32.442  | 17.1857   | 8.47571    | 1         |
| cg13881637  | KCNK4                   | 0.00051656        | 0.000516556          | 3.8204             | 3.8204                       | T up vs N                              | 18.755  | 16.8268   | 14.3551    | 1         |
| cg13885357  | KRT3                    | 3.06E-05          | 3.06E-05             | 48.6175            | 48.6175                      | T up vs N                              | 32.919  | 141.292   | 68.6738    | 1         |
| cg13889085  | ORS2B4                  | 8.57E-06          | 8.57E-06             | 0.276808           | -3.61261                     | T down vs N                            | 41.142  | 15.4519   | 6.00927    | 1         |
| cg13889620  | MORN3                   | 0.00673366        | 0.00673366           | 0.319541           | -3.12949                     | T down vs N                            | 9.6737  | 12.1908   | 20.1633    | 1         |
| cg13892570  | TAGLN2                  | 2.64E-06          | 2.64E-06             | 0.28264            | -3.53807                     | T down vs N                            | 50.023  | 14.9544   | 4.78316    | 1         |
| cg13894535  | CAPSL;CAPSL             | 2.28E-05          | 2.28E-05             | 0.241655           | -4.13813                     | T down vs N                            | 34.69   | 18.8924   | 8.71381    | 1         |
| cg13895650  | TLE1                    | 4.97E-05          | 4.97E-05             | 0.232822           | -4.29513                     | T down vs N                            | 30.103  | 19.8961   | 10.5751    | 1         |
| cg13896192  | HPCAL4                  | 0.00036452        | 0.000364518          | 3.07988            | 3.07988                      | T up vs N                              | 20.238  | 11.8517   | 9.36972    | 1         |
| cg13896328  | PTPRU;PTPRU;PTPRU       | 0.00267595        | 0.00267595           | 0.238666           | -4.18996                     | T down vs N                            | 12.591  | 19.225    | 24.4309    | 1         |
| cg13898697  | MAP7D1                  | 0.00113156        | 0.00113156           | 3.0579             | 3.0579                       | T up vs N                              | 15.652  | 11.7013   | 11.9617    | 1         |
| cg13899841  | FSD1L;FSD1L;FSD1L       | 5.64E-06          | 5.64E-06             | 0.229084           | -4.36521                     | T down vs N                            | 44.141  | 20.3404   | 7.37284    | 1         |
| cg13902067  | RNF183                  | 1.24E-05          | 1.24E-05             | 0.289682           | -3.45206                     | T down vs N                            | 38.626  | 14.3775   | 5.95561    | 1         |
| cg13902210  | KCNC4;KCNC4;KCNC4       | 0.00717242        | 0.00717242           | 5.94706            | 5.94706                      | T up vs N                              | 9.4871  | 29.7724   | 50.2113    | 1         |
| cg13903421  | WNT6                    | 6.39E-05          | 6.39E-05             | 4.7877             | 4.7877                       | T up vs N                              | 28.719  | 22.9706   | 12.7974    | 1         |
| cg13904806  | SAMD11                  | 0.0022704         | 0.0022704            | 4.65554            | 4.65554                      | T up vs N                              | 13.149  | 22.1568   | 26.9614    | 1         |
| cg13905252  | IPPK;CENPP              | 1.70E-05          | 1.70E-05             | 0.310143           | -3.22432                     | T down vs N                            | 36.529  | 12.8371   | 5.62278    | 1         |
| cg13905606  | MIR211;TRPM1            | 6.41E-05          | 6.41E-05             | 0.325233           | -3.07472                     | T down vs N                            | 28.704  | 11.8164   | 6.58656    | 1         |
| cg13906823  | TSTD1;TSTD1;TSTD1       | 1.85E-05          | 1.85E-05             | 13.4699            | 13.4699                      | T up vs N                              | 36.01   | 63.3376   | 28.142     | 1         |
| cg13909076  | CTDP1;CTDP1             | 9.02E-05          | 9.02E-05             | 0.238661           | -4.19004                     | T down vs N                            | 26.891  | 19.2256   | 11.4393    | 1         |
| cg13909661  | SSPN;SSPN               | 0.0024925         | 0.0024925            | 0.111934           | -8.93384                     | T down vs N                            | 12.83   | 44.9147   | 56.0107    | 1         |
| cg13909826  | AKNAD1                  | 4.92E-05          | 4.92E-05             | 0.266096           | -3.75804                     | T down vs N                            | 30.16   | 16.4161   | 8.70882    | 1         |
| cg13910813  | AKNA                    | 0.00056918        | 0.000569177          | 0.265258           | -3.76992                     | T down vs N                            | 18.354  | 16.4944   | 14.3791    | 1         |
| cg13910822  | COL5A1                  | 0.00027053        | 0.000270534          | 0.260156           | -3.84385                     | T down vs N                            | 21.561  | 16.9808   | 12.6013    | 1         |
| cg13911959  | ADARB2                  | 0.0003987         | 0.000398701          | 0.247344           | -4.04295                     | T down vs N                            | 19.851  | 18.2784   | 14.7328    | 1         |
| cg13912311  | NRS5A1                  | 0.00103032        | 0.00103032           | 9.45531            | 9.45531                      | T up vs N                              | 16.006  | 47.272    | 47.2535    | 1         |
| cg13912573  | LOC100129066            | 4.15E-05          | 4.15E-05             | 0.282109           | -3.54473                     | T down vs N                            | 31.133  | 14.9989   | 7.70823    | 1         |
| cg13912599  | ANXA9                   | 8.79E-05          | 8.79E-05             | 0.270788           | -3.69292                     | T down vs N                            | 27.021  | 15.9855   | 9.46538    | 1         |
| cg13912673  | C9orf64                 | 0.00150611        | 0.00150611           | 0.234127           | -4.27119                     | T down vs N                            | 14.596  | 19.7438   | 21.6424    | 1         |
| cg13912887  | NOXA1                   | 0.00090591        | 0.00090591           | 0.208405           | -4.79835                     | T down vs N                            | 16.5    | 23.0359   | 22.3376    | 1         |
| cg13913085  | TOM1L1                  | 6.83E-05          | 6.83E-05             | 0.308141           | -3.24527                     | T down vs N                            | 28.362  | 12.9796   | 7.32236    | 1         |
| cg13913666  | ZFAND2A                 | 0.000348          | 0.000348004          | 0.243678           | -4.10377                     | T down vs N                            | 20.441  | 18.6713   | 14.615     | 1         |

[illegible]

| Probeset ID                         | UCSC_REFGENE_NAME            | p-value<br>(Type) | p-value (T vs.<br>N) | Ratio (T<br>vs. N) | Fold-<br>Change (T<br>vs. N) | Fold-Change (T vs.<br>N) (Description) | F(Type) | SS (Type) | SS (Error) | F (Error) |
|-------------------------------------|------------------------------|-------------------|----------------------|--------------------|------------------------------|----------------------------------------|---------|-----------|------------|-----------|
| CCNB1IP1;CCNB1IP1;CCNB1IP1;CCNB1    |                              |                   |                      |                    |                              |                                        |         |           |            |           |
| cg13984103                          | IP1                          | 2.16E-05          | 2.16E-05             | 0.22657            | -4.41364                     | T down vs N                            | 35.047  | 20.6461   | 9.42557    | 1         |
| cg13985132                          | LOC390595                    | 0.00013025        | 0.000130245          | 4.80663            | 4.80663                      | T up vs N                              | 25.024  | 23.0866   | 14.7614    | 1         |
| cg13985252                          | TEX101;TEX101                | 0.00282901        | 0.00282901           | 0.321185           | -3.11347                     | T down vs N                            | 12.405  | 12.0814   | 15.5834    | 1         |
| cg13985518                          | HoxA2                        | 0.00200992        | 0.00200992           | 3.02706            | 3.02706                      | T up vs N                              | 13.571  | 11.49     | 13.5471    | 1         |
| cg13986536                          | FUBP3                        | 0.00022955        | 0.000229549          | 0.290286           | -3.44488                     | T down vs N                            | 22.311  | 14.3292   | 10.2759    | 1         |
| cg13986618                          | CD163L1                      | 5.15E-06          | 5.15E-06             | 0.218289           | -4.58109                     | T down vs N                            | 44.814  | 21.6948   | 7.74575    | 1         |
| cg13986762                          | MOSC1                        | 0.00082349        | 0.000823488          | 3.45372            | 3.45372                      | T up vs N                              | 16.872  | 14.3887   | 13.6453    | 1         |
| cg13987606                          | PIGM                         | 1.61E-05          | 1.61E-05             | 0.214997           | -4.65124                     | T down vs N                            | 36.917  | 22.1302   | 9.59138    | 1         |
| cg13987885                          | TOMM5;TOMM5;TOMM5            | 1.30E-05          | 1.30E-05             | 0.221665           | -4.51132                     | T down vs N                            | 38.284  | 21.2594   | 8.88493    | 1         |
| cg13990355                          | POU2F2                       | 7.57E-06          | 7.57E-06             | 4.26344            | 4.26344                      | T up vs N                              | 42.011  | 19.6944   | 7.50066    | 1         |
| cg13992008                          | FAM102A                      | 0.00086839        | 0.000868391          | 3.71451            | 3.71451                      | T up vs N                              | 16.664  | 16.1284   | 15.4855    | 1         |
| cg13994408                          | MAGEA10;MAGEA10              | 0.00055094        | 0.000550942          | 0.238764           | -4.18824                     | T down vs N                            | 18.488  | 19.214    | 16.6284    | 1         |
| cg13995453                          | KLRB1                        | 0.00210736        | 0.00210736           | 0.305477           | -3.27357                     | T down vs N                            | 13.406  | 13.1717   | 15.7206    | 1         |
| cg13995854                          | ST7OT2;ST7;ST7               | 5.79E-05          | 5.79E-05             | 0.203117           | -4.92326                     | T down vs N                            | 29.256  | 23.797    | 13.0146    | 1         |
|                                     |                              |                   |                      |                    |                              |                                        |         |           |            |           |
| cg13996698                          | ARHGAP8;ARHGAP8;PRR5-ARHGAP8 | 0.00333274        | 0.00333274           | 3.22248            | 3.22248                      | T up vs N                              | 11.864  | 12.8246   | 17.2957    | 1         |
| cg13997068                          | TPSG1                        | 7.41E-06          | 7.41E-06             | 0.30416            | -3.28774                     | T down vs N                            | 42.17   | 13.2679   | 5.03401    | 1         |
| cg13997435                          | S100A2                       | 0.0020246         | 0.0020246            | 0.318088           | -3.14378                     | T down vs N                            | 13.545  | 12.2884   | 14.5155    | 1         |
| cg13997759                          | CAPN12                       | 8.92E-06          | 8.92E-06             | 0.27452            | -3.64272                     | T down vs N                            | 40.861  | 15.6523   | 6.12903    | 1         |
| cg13999514                          | FLJ36031                     | 0.0020664         | 0.0020664            | 0.299877           | -3.3347                      | T down vs N                            | 13.474  | 13.586    | 16.133     | 1         |
| cg14001165                          | CCDC69                       | 0.00026457        | 0.000264566          | 0.312412           | -3.2009                      | T down vs N                            | 21.662  | 12.6778   | 9.3642     | 1         |
| cg14001893                          | SARDH;SARDH                  | 0.00035937        | 0.000359367          | 0.317546           | -3.14915                     | T down vs N                            | 20.3    | 12.325    | 9.71418    | 1         |
| cg14002772                          | SMARCA2;SMARCA2              | 0.00130814        | 0.00130814           | 3.77499            | 3.77499                      | T up vs N                              | 15.112  | 16.5279   | 17.4996    | 1         |
| cg14004271                          | SLC46A2                      | 4.02E-05          | 4.02E-05             | 0.106744           | -9.36817                     | T down vs N                            | 31.319  | 46.8832   | 23.951     | 1         |
| cg14006677                          | DIXDC1                       | 0.00160328        | 0.00160328           | 3.16983            | 3.16983                      | T up vs N                              | 14.371  | 12.4661   | 13.8794    | 1         |
| cg14007549                          | PDGFD;PDGFD                  | 1.57E-05          | 1.57E-05             | 8.89806            | 8.89806                      | T up vs N                              | 37.044  | 44.7503   | 19.3285    | 1         |
| cg14009013                          | ABI3;ABI3                    | 0.001249          | 0.001249             | 0.29869            | -3.34796                     | T down vs N                            | 15.283  | 13.6756   | 14.3174    | 1         |
| cg14010405                          | GTF2B                        | 5.97E-05          | 5.97E-05             | 0.236946           | -4.22037                     | T down vs N                            | 29.096  | 19.4196   | 10.6791    | 1         |
| cg14010852                          | NPFFR2;NPFFR2;NPFFR2         | 0.00027921        | 0.000279206          | 0.322983           | -3.09613                     | T down vs N                            | 21.418  | 11.9629   | 8.93655    | 1         |
| SEPT9;SEPT9;SEPT9;SEPT9;SEPT9;SEPT9 |                              |                   |                      |                    |                              |                                        |         |           |            |           |
| cg14011789                          | 9                            | 0.00066049        | 0.00066049           | 0.28188            | -3.5476                      | T down vs N                            | 17.748  | 15.0181   | 13.5388    | 1         |
| cg14014731                          | RPS6                         | 0.00018063        | 0.000180634          | 0.288675           | -3.4641                      | T down vs N                            | 23.434  | 14.4584   | 9.87161    | 1         |
| cg14014799                          | COMMD3                       | 0.00032405        | 0.00032405           | 0.199262           | -5.01852                     | T down vs N                            | 20.754  | 24.3727   | 18.7896    | 1         |
| cg14016344                          | CD72                         | 0.00029808        | 0.00029808           | 4.18092            | 4.18092                      | T up vs N                              | 21.125  | 19.1671   | 14.517     | 1         |
| cg14016554                          | DDAH2                        | 0.00011428        | 0.000114278          | 3.26595            | 3.26595                      | T up vs N                              | 25.678  | 13.1201   | 8.17517    | 1         |
| cg14016875                          | HS3ST3B1;MGC12916            | 0.00585916        | 0.00585916           | 4.47582            | 4.47582                      | T up vs N                              | 10.091  | 21.037    | 33.3571    | 1         |
| cg14018215                          | C9orf167                     | 5.26E-06          | 5.26E-06             | 3.25625            | 3.25625                      | T up vs N                              | 44.659  | 13.0542   | 4.67692    | 1         |
| cg14019186                          | GFM1;LXN                     | 7.52E-06          | 7.52E-06             | 12.5531            | 12.5531                      | T up vs N                              | 42.058  | 59.9503   | 22.8066    | 1         |
| cg14020052                          | HDAC4                        | 0.00388666        | 0.00388666           | 0.210921           | -4.7411                      | T down vs N                            | 11.367  | 22.6846   | 31.9297    | 1         |
| cg14020186                          | GFI1B;GFI1B                  | 0.00295271        | 0.00295271           | 0.321781           | -3.10771                     | T down vs N                            | 12.262  | 12.042    | 15.7128    | 1         |
| cg14021375                          | F2RL3                        | 4.30E-08          | 4.30E-08             | 0.187354           | -5.33748                     | T down vs N                            | 93.735  | 26.2702   | 4.48417    | 1         |
| cg14022022                          | GRIN1;GRIN1;GRIN1            | 0.0003007         | 0.000300703          | 4.56078            | 4.56078                      | T up vs N                              | 21.086  | 21.5682   | 16.3659    | 1         |
| cg14022137                          | ULBP1                        | 0.00606759        | 0.00606759           | 8.1444             | 8.1444                       | T up vs N                              | 10.186  | 38.7763   | 57.1014    | 1         |
| cg14022913                          | NEIL3                        | 6.98E-06          | 6.98E-06             | 0.122185           | -8.18428                     | T down vs N                            | 42.591  | 41.392    | 15.5497    | 1         |
| cg14023023                          | FAM176B                      | 0.00026935        | 0.000269349          | 0.304705           | -3.28186                     | T down vs N                            | 21.581  | 13.228    | 9.80735    | 1         |
| cg14026101                          | OR2T3                        | 3.70E-05          | 3.70E-05             | 0.13754            | -7.27059                     | T down vs N                            | 31.798  | 36.8616   | 18.5479    | 1         |
| cg14026451                          | CYP21A2;CYP21A2              | 7.10E-06          | 7.10E-06             | 0.28493            | -3.50964                     | T down vs N                            | 42.469  | 14.764    | 5.56223    | 1         |
| cg14027161                          | VAPA;VAPA                    | 0.00116633        | 0.00116633           | 0.331339           | -3.01806                     | T down vs N                            | 15.538  | 11.4283   | 11.768     | 1         |
| cg14027403                          | SEMA4G                       | 7.47E-05          | 7.47E-05             | 0.155662           | -6.42419                     | T down vs N                            | 27.88   | 32.4056   | 18.5973    | 1         |
| cg14028708                          | EXT1                         | 1.00E-06          | 1.00E-06             | 0.277825           | -3.59938                     | T down vs N                            | 58.348  | 15.3638   | 4.21302    | 1         |
| cg14029489                          | PRPH                         | 9.30E-06          | 9.30E-06             | 58.9256            | 58.9256                      | T up vs N                              | 40.567  | 155.628   | 61.3818    | 1         |
| cg14029629                          | MAGIX;MAGIX;MAGIX;MAGIX      | 0.00050693        | 0.00050693           | 0.286457           | -3.49093                     | T down vs N                            | 19.446  | 13.7774   | 10.6276    | 1         |
| cg14029856                          | OR8U8;OR5AR1                 | 9.76E-06          | 9.76E-06             | 0.167842           | -5.95798                     | T down vs N                            | 40.233  | 29.8337   | 11.8643    | 1         |
| cg14031683                          | PAQR6;PAQR6                  | 2.14E-05          | 2.14E-05             | 7.59024            | 7.59024                      | T up vs N                              | 36.861  | 36.2144   | 14.7371    | 1         |
| cg14033170                          | CREB5;CREB5;CREB5            | 1.45E-05          | 1.45E-05             | 0.279275           | -3.5807                      | T down vs N                            | 37.579  | 15.2392   | 6.4884     | 1         |
| cg14035045                          | HEMK1;C3orf18                | 2.37E-05          | 2.37E-05             | 0.316059           | -3.16396                     | T down vs N                            | 34.454  | 12.4261   | 5.77052    | 1         |
| cg14035368                          | CARD9;CARD9;DNLZ             | 7.58E-06          | 7.58E-06             | 7.89852            | 7.89852                      | T up vs N                              | 42.007  | 40.0042   | 15.2372    | 1         |
| cg14036143                          | HFE2;HFE2;HFE2;HFE2          | 0.00048577        | 0.000485773          | 4.22026            | 4.22026                      | T up vs N                              | 19.012  | 19.4189   | 16.3428    | 1         |
| cg14041069                          | FAM129C;FAM129C              | 0.00013381        | 0.000133813          | 0.260399           | -3.84027                     | T down vs N                            | 24.89   | 16.9573   | 10.9007    | 1         |
| cg14042099                          | ZBTB16;ZBTB16                | 2.01E-05          | 2.01E-05             | 0.245119           | -4.07965                     | T down vs N                            | 35.478  | 18.5157   | 8.35037    | 1         |
| cg14042132                          | CD58;CD58;CD58               | 3.04E-05          | 3.04E-05             | 0.318715           | -3.1376                      | T down vs N                            | 32.953  | 12.2462   | 5.94607    | 1         |
| cg14044707                          | USP20;USP20;USP20            | 0.00426           | 0.00426              | 0.330857           | -3.02246                     | T down vs N                            | 11.076  | 11.4585   | 16.5527    | 1         |
| cg14044785                          | THADA;THADA                  | 1.66E-06          | 1.66E-06             | 0.243245           | -4.11109                     | T down vs N                            | 53.879  | 18.7184   | 5.55862    | 1         |
| cg14046477                          | NR6A1;NR6A1                  | 0.00026317        | 0.000263173          | 0.126546           | -7.90228                     | T down vs N                            | 22.467  | 37.6684   | 25.149     | 1         |
| cg14048783                          | CNTLN;CNTLN                  | 0.00029578        | 0.000295779          | 0.256033           | -3.90574                     | T down vs N                            | 21.16   | 17.3861   | 13.1465    | 1         |
| cg14051161                          | SLC13A5;SLC13A5              | 0.00329346        | 0.00329346           | 3.32674            | 3.32674                      | T up vs N                              | 11.903  | 13.5321   | 18.1905    | 1         |
| cg14051639                          | TRIM26                       | 3.61E-05          | 3.61E-05             | 0.239892           | -4.16854                     | T down vs N                            | 31.942  | 19.0877   | 9.56119    | 1         |
| cg14052065                          | LCN10                        | 0.00089812        | 0.000898124          | 0.214542           | -4.66108                     | T down vs N                            | 16.534  | 22.1911   | 21.4749    | 1         |
| cg14052210                          | HCG11                        | 9.02E-05          | 9.02E-05             | 4.1677             | 4.1677                       | T up vs N                              | 26.892  | 19.0823   | 11.3537    | 1         |
| cg14052235                          | ELANE                        | 0.00307051        | 0.00307051           | 0.309621           | -3.22976                     | T down vs N                            | 12.133  | 12.8741   | 16.9777    | 1         |
| cg14053590                          | EPO                          | 0.0001996         | 0.000199601          | 0.323135           | -3.09468                     | T down vs N                            | 22.962  | 11.953    | 8.32882    | 1         |

| Probeset ID                         | UCSC_REFGENE_NAME          | p-value<br>(Type) | p-value (T vs.<br>N) | Ratio (T<br>vs. N) | Fold-<br>Change (T<br>vs. N) | Fold-Change (T vs.<br>N) (Description) | F(Type) | SS (Type) | SS (Error) | F (Error) |
|-------------------------------------|----------------------------|-------------------|----------------------|--------------------|------------------------------|----------------------------------------|---------|-----------|------------|-----------|
| FCAR;FCAR;FCAR;FCAR;FCAR;FCAR;FC    |                            |                   |                      |                    |                              |                                        |         |           |            |           |
| cg14055835                          | AR;FCAR;FCAR               | 4.74E-06          | 4.74E-06             | 0.2748             | -3.63902                     | T down vs N                            | 45.44   | 15.6277   | 5.50268    | 1         |
| cg14055970                          | ENG;ENG                    | 8.92E-06          | 8.92E-06             | 9.85481            | 9.85481                      | T up vs N                              | 40.858  | 49.0296   | 19.2002    | 1         |
| cg14057760                          | DDX47;DDX47                | 0.00142645        | 0.00142645           | 0.274639           | -3.64115                     | T down vs N                            | 14.794  | 15.6418   | 16.917     | 1         |
| cg14057961                          | HSPA2;HSPA2                | 0.00048264        | 0.000482636          | 5.21921            | 5.21921                      | T up vs N                              | 19.039  | 25.5719   | 21.4904    | 1         |
| cg14058100                          | KIF26A                     | 0.00337535        | 0.00337535           | 0.218468           | -4.57733                     | T down vs N                            | 11.823  | 21.6713   | 29.329     | 1         |
| cg14058239                          | SLC39A6;SLC39A6            | 0.00031466        | 0.000314658          | 0.278119           | -3.59558                     | T down vs N                            | 20.884  | 15.3385   | 11.7512    | 1         |
| cg14059221                          | GOSR1;GOSR1;GOSR1          | 3.12E-05          | 3.12E-05             | 0.229672           | -4.35403                     | T down vs N                            | 32.794  | 20.2697   | 9.88959    | 1         |
| cg14061067                          | BNC2                       | 0.00191738        | 0.00191738           | 0.25165            | -3.97377                     | T down vs N                            | 13.735  | 17.8296   | 20.7692    | 1         |
| cg14062643                          | PIPSKL1;PIPSKL1            | 0.00017692        | 0.00017692           | 0.17535            | -5.7029                      | T down vs N                            | 23.533  | 28.3887   | 19.3011    | 1         |
| cg14067101                          | DMRT3                      | 0.00118729        | 0.00118729           | 0.206767           | -4.83635                     | T down vs N                            | 15.472  | 23.2682   | 24.063     | 1         |
| cg14068309                          | EIF2B1                     | 6.72E-05          | 6.72E-05             | 0.290904           | -3.43756                     | T down vs N                            | 28.446  | 14.28     | 8.03217    | 1         |
| cg14069088                          | CDKN2BAS                   | 0.00106206        | 0.00106206           | 0.175119           | -5.7104                      | T down vs N                            | 15.891  | 28.4317   | 28.6266    | 1         |
| cg14070039                          | TNXB;TNXB;TNXB             | 0.00420497        | 0.00420497           | 0.309751           | -3.2284                      | T down vs N                            | 11.117  | 12.8649   | 18.5157    | 1         |
| cg14073571                          | VIPR2                      | 0.00092983        | 0.00092983           | 3.53838            | 3.53838                      | T up vs N                              | 16.4    | 14.9564   | 14.5921    | 1         |
| cg14073986                          | SLMO2                      | 0.0029072         | 0.0029072            | 0.279626           | -3.57621                     | T down vs N                            | 12.314  | 15.2092   | 19.7623    | 1         |
| cg14082739                          | NEK6;NEK6;NEK6;NEK6        | 0.00013278        | 0.000132779          | 0.268616           | -3.72278                     | T down vs N                            | 24.928  | 16.1832   | 10.3871    | 1         |
| cg14082886                          | CD44;CD44;CD44;CD44;CD44   | 4.40E-05          | 4.40E-05             | 0.302912           | -3.30128                     | T down vs N                            | 30.797  | 13.3597   | 6.94071    | 1         |
| cg14084907                          | TP73;TP73;TP73;TP73        | 0.00029975        | 0.000299752          | 3.33662            | 3.33662                      | T up vs N                              | 21.1    | 13.599    | 10.3119    | 1         |
| cg14086013                          | MDFI                       | 0.00192582        | 0.00192582           | 3.33406            | 3.33406                      | T up vs N                              | 13.72   | 13.5816   | 15.8386    | 1         |
| cg14087880                          | PPYR1                      | 0.00110873        | 0.00110873           | 4.38992            | 4.38992                      | T up vs N                              | 15.728  | 20.4965   | 20.8504    | 1         |
| cg14088161                          | ACTL6B                     | 7.24E-05          | 7.24E-05             | 0.27323            | -3.65992                     | T down vs N                            | 28.048  | 15.7665   | 8.99401    | 1         |
| cg14088584                          | PTPRK;PTPRK                | 1.06E-05          | 1.06E-05             | 0.110438           | -9.05486                     | T down vs N                            | 39.672  | 45.4684   | 18.3375    | 1         |
| cg14088669                          | OR10K1                     | 0.0022602         | 0.0022602            | 0.275974           | -3.62353                     | T down vs N                            | 13.164  | 15.5246   | 18.8689    | 1         |
| cg14088921                          | MATN2;MATN2                | 3.04E-05          | 3.04E-05             | 0.253052           | -3.95176                     | T down vs N                            | 32.944  | 17.6863   | 8.58972    | 1         |
| cg14091978                          | C1orf94;C1orf94            | 1.50E-05          | 1.50E-05             | 0.187234           | -5.34092                     | T down vs N                            | 37.369  | 26.2904   | 11.2566    | 1         |
| cg14093012                          | LHX6;LHX6                  | 0.00085823        | 0.00085823           | 0.168711           | -5.92729                     | T down vs N                            | 16.71   | 29.6613   | 28.4007    | 1         |
| cg14094027                          | PXN;PXN;PXN                | 0.00019323        | 0.000193234          | 0.219446           | -4.55692                     | T down vs N                            | 23.115  | 21.5442   | 14.9128    | 1         |
| cg14094444                          | G3BP1;G3BP1                | 0.00267539        | 0.00267539           | 0.318979           | -3.13501                     | T down vs N                            | 12.591  | 12.2285   | 15.539     | 1         |
| cg14094498                          | PAPPA                      | 9.47E-06          | 9.47E-06             | 0.242156           | -4.12957                     | T down vs N                            | 40.445  | 18.8374   | 7.45211    | 1         |
| cg14094639                          | AURKAIP1;AURKAIP1;AURKAIP1 | 0.00044425        | 0.000444247          | 0.305339           | -3.27505                     | T down vs N                            | 19.389  | 13.1818   | 10.878     | 1         |
| cg14096207                          | SUSD4                      | 0.00030952        | 0.000309515          | 0.188931           | -5.29294                     | T down vs N                            | 20.958  | 26.008    | 19.8558    | 1         |
| cg14096229                          | BTNL2                      | 0.00282753        | 0.00282753           | 0.326591           | -3.06193                     | T down vs N                            | 12.406  | 11.7289   | 15.1265    | 1         |
| cg14097117                          | PLSCR3                     | 0.00067216        | 0.000672159          | 0.295016           | -3.38965                     | T down vs N                            | 17.678  | 13.9572   | 12.6326    | 1         |
| cg14097499                          | OBP2A                      | 4.97E-06          | 4.97E-06             | 0.27822            | -3.59428                     | T down vs N                            | 45.081  | 15.3298   | 5.44083    | 1         |
| cg14099812                          | FCN1                       | 0.00669493        | 0.00669493           | 0.262185           | -3.06575                     | T down vs N                            | 9.6908  | 11.755    | 19.4081    | 1         |
| cg14101485                          | NFIC;NFIC                  | 0.00509972        | 0.00509972           | 0.314271           | -3.18196                     | T down vs N                            | 10.515  | 12.5488   | 19.0956    | 1         |
| cg14102988                          | LPAR1;LPAR1                | 0.00244118        | 0.00244118           | 3.18563            | 3.18563                      | T up vs N                              | 12.901  | 12.5738   | 15.5943    | 1         |
| cg14103872                          | OLFML2A                    | 0.00159159        | 0.00159159           | 0.333155           | -3.0016                      | T down vs N                            | 14.397  | 11.3155   | 12.5753    | 1         |
| VEPH1;VEPH1;VEPH1;VEPH1;VEPH1;V     |                            |                   |                      |                    |                              |                                        |         |           |            |           |
| cg14106308                          | EPH1                       | 0.00036723        | 0.000367233          | 4.00332            | 4.00332                      | T up vs N                              | 20.206  | 18.0215   | 14.2702    | 1         |
| cg14106719                          | GNAQ                       | 1.67E-06          | 1.67E-06             | 0.259349           | -3.85581                     | T down vs N                            | 53.817  | 17.0592   | 5.07175    | 1         |
| cg14107638                          | MAGEA5                     | 0.004727          | 0.004727             | 0.306939           | -3.25798                     | T down vs N                            | 10.75   | 13.0659   | 19.4476    | 1         |
| cg14108380                          | SDCCAG3;SDCCAG3;SDCCAG3    | 0.00093654        | 0.000936538          | 0.225414           | -4.43628                     | T down vs N                            | 16.372  | 20.7887   | 20.3166    | 1         |
| cg14108532                          | PSG10                      | 1.93E-05          | 1.93E-05             | 0.249825           | -4.00279                     | T down vs N                            | 35.755  | 18.0181   | 8.06295    | 1         |
| cg14110168                          | MYO1F                      | 0.00052995        | 0.000529952          | 0.285314           | -3.50491                     | T down vs N                            | 18.649  | 14.7323   | 12.64      | 1         |
| C6orf25;C6orf25;C6orf25;C6orf25;C6o |                            |                   |                      |                    |                              |                                        |         |           |            |           |
| cg14110444                          | rF25;C6orf25;LY6G6C        | 7.23E-06          | 7.23E-06             | 0.195364           | -5.11866                     | T down vs N                            | 42.342  | 24.9734   | 9.43684    | 1         |
| cg14110885                          | WFIKKN2                    | 0.00265944        | 0.00265944           | 0.325346           | -3.07365                     | T down vs N                            | 12.611  | 11.8091   | 14.9821    | 1         |
| cg14112569                          | ITGB5                      | 5.98E-05          | 5.98E-05             | 0.239986           | -4.16691                     | T down vs N                            | 29.086  | 19.0772   | 10.4944    | 1         |
| cg14112754                          | GP5                        | 0.00117523        | 0.00117523           | 5.43258            | 5.43258                      | T up vs N                              | 15.51   | 26.8272   | 27.6752    | 1         |
| cg14112958                          | LOC283663                  | 0.00012716        | 0.000127159          | 5.90834            | 5.90834                      | T up vs N                              | 25.143  | 29.5547   | 18.8076    | 1         |
| cg14113931                          | CEP76;PSMG2                | 0.00071861        | 0.000718611          | 0.320616           | -3.11899                     | T down vs N                            | 17.41   | 12.1191   | 11.1376    | 1         |
| cg14115597                          | SSBP2                      | 7.55E-05          | 7.55E-05             | 0.324986           | -3.07705                     | T down vs N                            | 27.821  | 11.8324   | 6.80483    | 1         |
| cg14116509                          | WFIKKN2                    | 2.44E-05          | 2.44E-05             | 0.193832           | -5.1591                      | T down vs N                            | 34.283  | 25.2146   | 11.7677    | 1         |
| cg14119158                          | MAP7                       | 0.00236448        | 0.00236448           | 0.301248           | -3.31953                     | T down vs N                            | 13.01   | 13.4833   | 16.5824    | 1         |
| cg14119827                          | MIR526A1                   | 0.00033287        | 0.000332865          | 0.22737            | -4.39813                     | T down vs N                            | 20.636  | 20.5483   | 15.9321    | 1         |
| cg14119936                          | ORS1F1                     | 0.00034679        | 0.00034679           | 0.206158           | -4.85065                     | T down vs N                            | 20.456  | 23.3554   | 18.2679    | 1         |
| cg14120129                          | TGFB1                      | 0.00050663        | 0.000506632          | 13.7757            | 13.7757                      | T up vs N                              | 18.836  | 64.4358   | 54.735     | 1         |
| cg14121142                          | DDN                        | 3.29E-05          | 3.29E-05             | 22.5675            | 22.5675                      | T up vs N                              | 32.488  | 90.9702   | 44.8015    | 1         |
| cg14125368                          | DDX31                      | 1.32E-05          | 1.32E-05             | 0.322947           | -3.09648                     | T down vs N                            | 38.213  | 11.9653   | 5.01       | 1         |
| cg14126328                          | DOLPP1;DOLPP1              | 0.00019133        | 0.000191328          | 0.240206           | -4.1631                      | T down vs N                            | 23.162  | 19.0528   | 13.1616    | 1         |
| cg14126466                          | TBX5;TBX5;TBX5;TBX5        | 4.53E-06          | 4.53E-06             | 0.103312           | -9.67941                     | T down vs N                            | 45.789  | 48.2629   | 16.8646    | 1         |
| cg14126583                          | SLC40A1                    | 0.00024442        | 0.000244422          | 7.91621            | 7.91621                      | T up vs N                              | 22.023  | 40.0909   | 29.1272    | 1         |
| cg14126733                          | ADAMTSL2;ADAMTSL2          | 7.80E-06          | 7.80E-06             | 0.273855           | -3.65157                     | T down vs N                            | 41.799  | 15.7111   | 6.01402    | 1         |
| cg14131536                          | ZAP70                      | 0.00406803        | 0.00406803           | 4.4638             | 4.4638                       | T up vs N                              | 11.222  | 20.9616   | 29.8867    | 1         |
| cg14132888                          | TRIM36;TRIM36;TRIM36       | 0.00343874        | 0.00343874           | 3.13423            | 3.13423                      | T up vs N                              | 11.762  | 12.2232   | 16.6275    | 1         |
| cg14133064                          | PDCD1LG2                   | 2.17E-05          | 2.17E-05             | 0.262361           | -3.81154                     | T down vs N                            | 35.006  | 16.7685   | 7.66432    | 1         |
| cg14133643                          | SIGLEC7;SIGLEC7            | 7.18E-05          | 7.18E-05             | 0.327196           | -3.05627                     | T down vs N                            | 28.093  | 11.6902   | 6.65807    | 1         |
| cg14133850                          | MPP7                       | 5.30E-06          | 5.30E-06             | 0.106446           | -9.39446                     | T down vs N                            | 44.606  | 47.0007   | 16.8591    | 1         |
| cg14135214                          | EPS8L2                     | 3.01E-06          | 3.01E-06             | 7.53102            | 7.53102                      | T up vs N                              | 48.976  | 38.181    | 12.4735    | 1         |
| cg14135807                          | UCHL3                      | 0.00012121        | 0.000121213          | 0.314261           | -3.18207                     | T down vs N                            | 25.382  | 12.5495   | 7.91085    | 1         |

| Probeset ID                   | UCSC_REFGENE_NAME       | p-value<br>(Type) | p-value (T vs.<br>N) | Ratio (T<br>vs. N) | Fold-<br>Change (T<br>vs. N) | Fold-Change (T vs.<br>N) (Description) | F(Type) | SS (Type) | SS (Error) | F (Error) |
|-------------------------------|-------------------------|-------------------|----------------------|--------------------|------------------------------|----------------------------------------|---------|-----------|------------|-----------|
| cg14137381                    | SLC9A3                  | 1.33E-05          | 1.33E-05             | 0.048821           | -20.4832                     | T down vs N                            | 38.159  | 85.4007   | 35.8084    | 1         |
| cg14138132                    | CLIC1                   | 3.40E-05          | 3.40E-05             | 5.75196            | 5.75196                      | T up vs N                              | 32.283  | 28.6688   | 14.2088    | 1         |
| cg14138969                    | ZNF837;ZNF837           | 0.00010297        | 0.000102971          | 0.15908            | -6.28616                     | T down vs N                            | 26.207  | 31.6533   | 19.3251    | 1         |
| cg14141399                    | HAS1                    | 7.08E-06          | 7.08E-06             | 0.288063           | -3.47147                     | T down vs N                            | 42.488  | 14.5079   | 5.46334    | 1         |
| cg14141514                    | PIP                     | 7.66E-07          | 7.66E-07             | 0.195063           | -5.12655                     | T down vs N                            | 60.876  | 25.0205   | 6.57611    | 1         |
| cg14142627                    | CARS2                   | 8.18E-05          | 8.18E-05             | 0.197402           | -5.0658                      | T down vs N                            | 27.4    | 24.6568   | 14.3984    | 1         |
| cg14142743                    | NFIL3                   | 0.0004244         | 0.000424404          | 0.331713           | -3.01465                     | T down vs N                            | 19.583  | 11.405    | 9.31832    | 1         |
| cg14143580                    | DEFB118                 | 0.00020992        | 0.000209915          | 0.231148           | -4.32623                     | T down vs N                            | 22.726  | 20.0936   | 14.1465    | 1         |
| cg14144559                    | STXBPSL                 | 0.00020724        | 0.000207242          | 0.209711           | -4.76846                     | T down vs N                            | 22.786  | 22.8526   | 16.0467    | 1         |
| cg14151317                    | ABCA2;ABCA2             | 4.21E-05          | 4.21E-05             | 6.99383            | 6.99383                      | T up vs N                              | 32.482  | 33.3491   | 15.4003    | 1         |
| cg14151783                    | WFDC2;WFDC2             | 6.86E-06          | 6.86E-06             | 16.8469            | 16.8469                      | T up vs N                              | 42.721  | 74.7039   | 27.9784    | 1         |
| cg14152465                    | LINGO2                  | 1.63E-06          | 1.63E-06             | 0.312109           | -3.20401                     | T down vs N                            | 54.074  | 12.6989   | 3.75749    | 1         |
| cg14153061                    | STX17                   | 1.24E-07          | 1.24E-07             | 0.232662           | -4.29808                     | T down vs N                            | 80.278  | 19.9148   | 3.96916    | 1         |
| PHYHD1;PHYHD1;PHYHD1;PHYHD1;P |                         |                   |                      |                    |                              |                                        |         |           |            |           |
| cg14153069                    | HYHD1                   | 0.00017472        | 0.000174717          | 0.331189           | -3.01943                     | T down vs N                            | 23.593  | 11.4377   | 7.75661    | 1         |
| cg14153637                    | RALYL;RALYL;RALYL;RALYL | 0.00129071        | 0.00129071           | 0.277118           | -3.60857                     | T down vs N                            | 15.161  | 15.425    | 16.2785    | 1         |
| cg14153677                    | CASC2;CASC2             | 0.0048343         | 0.0048343            | 0.303127           | -3.29895                     | T down vs N                            | 10.68   | 13.3439   | 19.9911    | 1         |
| cg14153740                    | TRYX3                   | 0.0007501         | 0.000750103          | 0.242376           | -4.12582                     | T down vs N                            | 17.24   | 18.8133   | 17.4606    | 1         |
| cg14153927                    | HIF3A;HIF3A;HIF3A       | 1.28E-05          | 1.28E-05             | 0.294366           | -3.39713                     | T down vs N                            | 38.379  | 14.0076   | 5.83971    | 1         |
| SNORD115-15;SNORD115-         |                         |                   |                      |                    |                              |                                        |         |           |            |           |
| cg14154381                    | 21;SNORD115-34          | 0.00017096        | 0.000170959          | 0.277364           | -3.60537                     | T down vs N                            | 23.697  | 15.4037   | 10.4003    | 1         |
| cg14154784                    | TLE1                    | 1.63E-06          | 1.63E-06             | 0.163061           | -6.13269                     | T down vs N                            | 54.064  | 30.8078   | 9.11746    | 1         |
| cg14155724                    | POM121L2                | 5.03E-06          | 5.03E-06             | 0.133362           | -7.49837                     | T down vs N                            | 44.988  | 38.0169   | 13.5206    | 1         |
| cg14157107                    | BNC2                    | 4.18E-06          | 4.18E-06             | 0.246562           | -4.05577                     | T down vs N                            | 46.402  | 18.3614   | 6.33124    | 1         |
| cg14162076                    | CLEC4D                  | 1.74E-06          | 1.74E-06             | 0.273922           | -3.65067                     | T down vs N                            | 53.492  | 15.7051   | 4.69759    | 1         |
| cg14162906                    | TMEM222                 | 1.73E-06          | 1.73E-06             | 0.279248           | -3.58105                     | T down vs N                            | 53.525  | 15.2415   | 4.55611    | 1         |
| cg14163706                    | NOL8;CENPP;NOL8         | 1.98E-05          | 1.98E-05             | 0.269976           | -3.70403                     | T down vs N                            | 35.592  | 16.0591   | 7.21919    | 1         |
| cg14165096                    | AGAP1;AGAP1             | 0.00187647        | 0.00187647           | 0.328463           | -3.04448                     | T down vs N                            | 13.811  | 11.6094   | 13.4493    | 1         |
| cg14166832                    | TSSC1                   | 0.00056423        | 0.000564234          | 0.234859           | -4.25788                     | T down vs N                            | 18.39   | 19.659    | 17.1044    | 1         |
| cg14168316                    | GOLGA1                  | 2.42E-05          | 2.42E-05             | 0.300824           | -3.3242                      | T down vs N                            | 34.34   | 13.5149   | 6.29707    | 1         |
| cg14168713                    | BICC1                   | 0.00021438        | 0.00021438           | 0.308615           | -3.24028                     | T down vs N                            | 22.628  | 12.9457   | 9.15371    | 1         |
| cg14168975                    | ALAS2;ALAS2;ALAS2       | 0.00068723        | 0.000687228          | 0.288503           | -3.46617                     | T down vs N                            | 17.589  | 14.4723   | 13.1652    | 1         |
| cg14170547                    | POMC;POMC               | 0.00022555        | 0.000225553          | 0.288759           | -3.46309                     | T down vs N                            | 22.392  | 14.4517   | 10.3262    | 1         |
| cg14170840                    | C1orf109                | 0.0001804         | 0.000180401          | 0.112242           | -8.90932                     | T down vs N                            | 23.441  | 44.8021   | 30.581     | 1         |
| cg14171514                    | AHNAK;AHNAK             | 0.00023259        | 0.000232588          | 0.168491           | -5.93502                     | T down vs N                            | 22.251  | 29.7048   | 21.3603    | 1         |
| cg14171727                    | EPB41L4B                | 3.58E-05          | 3.58E-05             | 0.23436            | -4.26695                     | T down vs N                            | 31.989  | 19.7168   | 9.86181    | 1         |
| cg14173523                    | FUT5                    | 1.06E-05          | 1.06E-05             | 0.205455           | -4.86724                     | T down vs N                            | 39.658  | 23.4565   | 9.46343    | 1         |
| cg14173587                    | ABCA2;ABCA2             | 0.0004472         | 0.000447199          | 4.2616             | 4.2616                       | T up vs N                              | 19.36   | 19.6827   | 16.2663    | 1         |
| cg14175304                    | RNF213;RNF213           | 4.23E-08          | 4.23E-08             | 0.227917           | -4.38757                     | T down vs N                            | 93.957  | 20.4817   | 3.48784    | 1         |
| cg14177914                    | C1orf61                 | 1.52E-05          | 1.52E-05             | 0.104714           | -9.54978                     | T down vs N                            | 37.261  | 47.6913   | 20.4788    | 1         |
| cg14177934                    | C11orf95                | 0.00165647        | 0.00165647           | 4.48146            | 4.48146                      | T up vs N                              | 14.254  | 21.0725   | 23.654     | 1         |
| cg14178043                    | CAPN2;CAPN2             | 1.98E-05          | 1.98E-05             | 0.218398           | -4.5788                      | T down vs N                            | 35.569  | 21.6805   | 9.75248    | 1         |
| cg14181576                    | FGR                     | 2.10E-05          | 2.10E-05             | 14.3155            | 14.3155                      | T up vs N                              | 35.223  | 66.338    | 30.1336    | 1         |
| cg14183976                    | MAST1                   | 0.006947          | 0.006947             | 6.04498            | 6.04498                      | T up vs N                              | 9.5813  | 30.3203   | 50.6326    | 1         |
| cg14185229                    | GPR4                    | 0.00115867        | 0.00115867           | 0.248988           | -4.01626                     | T down vs N                            | 15.563  | 18.1055   | 18.6141    | 1         |
| cg14185341                    | FAM21A                  | 1.06E-05          | 1.06E-05             | 0.280775           | -3.56157                     | T down vs N                            | 39.688  | 15.1114   | 6.09211    | 1         |
| cg14185717                    | BNC2                    | 3.34E-05          | 3.34E-05             | 0.300506           | -3.32772                     | T down vs N                            | 32.4    | 13.5388   | 6.68585    | 1         |
| cg14185918                    | KLF4                    | 0.00020297        | 0.00020297           | 9.3031             | 9.3031                       | T up vs N                              | 22.884  | 46.5915   | 32.5763    | 1         |
| cg14186336                    | GSN;GSN;GSN;GSN;GSN;GSN | 0.00251705        | 0.00251705           | 0.231627           | -4.31729                     | T down vs N                            | 12.797  | 20.0368   | 25.0517    | 1         |
| cg14186558                    | RNF183                  | 1.77E-05          | 1.77E-05             | 0.214363           | -4.66498                     | T down vs N                            | 36.277  | 22.2152   | 9.79794    | 1         |
| cg14187895                    | ERBB2;PGAP3             | 6.69E-07          | 6.69E-07             | 0.169768           | -5.89039                     | T down vs N                            | 62.175  | 29.4535   | 7.57956    | 1         |
| cg14189142                    | GALNT9                  | 0.00109205        | 0.00109205           | 0.160771           | -6.22003                     | T down vs N                            | 15.786  | 31.2901   | 31.7149    | 1         |
| cg14191040                    | CYP2C9                  | 3.63E-06          | 3.63E-06             | 0.203756           | -4.90782                     | T down vs N                            | 47.477  | 23.7033   | 7.98817    | 1         |
| cg14193097                    | ALAD                    | 0.00050236        | 0.000502363          | 0.279456           | -3.57838                     | T down vs N                            | 18.871  | 15.2237   | 12.9076    | 1         |
| cg14194634                    | LOC402377               | 0.00105013        | 0.00105013           | 0.258304           | -3.87141                     | T down vs N                            | 15.934  | 17.1615   | 17.2327    | 1         |
| cg14194983                    | NPPA                    | 0.00024928        | 0.000249284          | 0.32533            | -3.0738                      | T down vs N                            | 21.932  | 11.8101   | 8.61564    | 1         |
| cg14195059                    | TGM7                    | 0.00034854        | 0.000348535          | 0.298863           | -3.34601                     | T down vs N                            | 20.434  | 13.6625   | 10.6979    | 1         |
| cg14195117                    | SUSD1                   | 4.80E-05          | 4.80E-05             | 0.316447           | -3.16008                     | T down vs N                            | 30.305  | 12.3996   | 6.54651    | 1         |
| cg14195216                    | ANKS1B;ANKS1B;ANKS1B    | 0.00067931        | 0.000679306          | 0.326102           | -3.06652                     | T down vs N                            | 17.635  | 11.7603   | 10.6699    | 1         |
| cg14197071                    | PRDM8                   | 1.97E-05          | 1.97E-05             | 12.4593            | 12.4593                      | T up vs N                              | 35.611  | 59.5956   | 26.7764    | 1         |
| cg14198450                    | PCSK5                   | 0.00306521        | 0.00306521           | 0.310609           | -3.21948                     | T down vs N                            | 12.139  | 12.8042   | 16.8776    | 1         |
| cg14199144                    | HTR3A;HTR3A;HTR3A       | 0.00427763        | 0.00427763           | 0.300456           | -3.32828                     | T down vs N                            | 11.063  | 13.5425   | 19.5863    | 1         |
| cg14199570                    | PFDN6;WDR46;WDR46       | 2.79E-06          | 2.79E-06             | 0.263038           | -3.80173                     | T down vs N                            | 49.566  | 16.704    | 5.39204    | 1         |
| cg14199833                    | DAXX;DAXX;DAXX;DAXX     | 8.36E-05          | 8.36E-05             | 0.138109           | -7.24068                     | T down vs N                            | 27.285  | 36.7085   | 21.5261    | 1         |
| cg14200859                    | RALGPS1                 | 7.62E-05          | 7.62E-05             | 0.299273           | -3.34143                     | T down vs N                            | 27.773  | 13.6315   | 7.85301    | 1         |
| cg14201291                    | PLXNA2                  | 9.91E-06          | 9.91E-06             | 0.122046           | -8.19365                     | T down vs N                            | 40.135  | 41.437    | 16.5192    | 1         |
| cg14201424                    | MGC45800                | 0.00266036        | 0.00266036           | 8.38477            | 8.38477                      | T up vs N                              | 12.61   | 42.3505   | 53.7347    | 1         |
| cg14202338                    | GIPC3                   | 4.89E-06          | 4.89E-06             | 0.319655           | -3.12838                     | T down vs N                            | 45.208  | 12.1832   | 4.31189    | 1         |
| cg14203613                    | ITPR1;ITPR1;ITPR1       | 0.00032621        | 0.000326207          | 0.286712           | -3.48782                     | T down vs N                            | 20.725  | 14.6177   | 11.2851    | 1         |
| cg14203721                    | FPR2;FPR2;FPR2          | 0.00207957        | 0.00207957           | 0.222177           | -4.50092                     | T down vs N                            | 13.452  | 21.1943   | 25.209     | 1         |
| cg14203827                    | ZNF236                  | 0.00017692        | 0.000176922          | 0.275509           | -3.62964                     | T down vs N                            | 23.533  | 15.5653   | 10.5827    | 1         |
| cg14205519                    | C9orf139;FUT7           | 0.00085085        | 0.000850851          | 0.157773           | -6.33823                     | T down vs N                            | 16.744  | 31.9379   | 30.5191    | 1         |

| Probeset ID | UCSC_REFGENE_NAME          | p-value<br>(Type) | p-value (T vs.<br>N) | Ratio (T<br>vs. N) | Fold-<br>Change (T<br>vs. N) | Fold-Change (T vs.<br>N) (Description) | F(Type) | SS (Type) | SS (Error) | F (Error) |
|-------------|----------------------------|-------------------|----------------------|--------------------|------------------------------|----------------------------------------|---------|-----------|------------|-----------|
| cg14209244  | SMC5                       | 0.00015985        | 0.000159846          | 0.283013           | -3.53341                     | T down vs N                            | 24.021  | 14.9232   | 9.9402     | 1         |
| cg14210726  | TMC8                       | 0.0003904         | 0.000390399          | 3.95396            | 3.95396                      | T up vs N                              | 19.941  | 17.7006   | 14.2022    | 1         |
| cg14210985  | PTHLH;PTHLH;PTHLH;PTHLH    | 0.00234456        | 0.00234456           | 0.262852           | -3.80442                     | T down vs N                            | 13.039  | 16.7217   | 20.5195    | 1         |
| cg14211075  | TSC1;TSC1;TSC1             | 1.47E-05          | 1.47E-05             | 0.242038           | -4.13158                     | T down vs N                            | 37.479  | 18.8503   | 8.04732    | 1         |
| cg14211310  | COL28A1                    | 5.61E-05          | 5.61E-05             | 0.176424           | -5.66815                     | T down vs N                            | 29.435  | 28.1898   | 15.323     | 1         |
| cg14211735  | PSMA4;PSMA4;PSMA4          | 2.76E-05          | 2.76E-05             | 0.293271           | -3.40981                     | T down vs N                            | 33.535  | 14.0931   | 6.72413    | 1         |
| cg14213424  | LGALS9C;LGALS9C            | 1.09E-06          | 1.09E-06             | 0.244594           | -4.0884                      | T down vs N                            | 57.568  | 18.5722   | 5.16183    | 1         |
| cg14214353  | MFS2D8                     | 0.00125575        | 0.00125575           | 0.322964           | -3.09632                     | T down vs N                            | 15.263  | 11.9642   | 12.542     | 1         |
| cg14215338  | C9orf50                    | 0.00021158        | 0.000211576          | 0.171044           | -5.84644                     | T down vs N                            | 22.689  | 29.2052   | 20.5948    | 1         |
| cg14215472  | ANKRD13B                   | 1.27E-05          | 1.27E-05             | 4.82406            | 4.82406                      | T up vs N                              | 38.459  | 23.1931   | 9.64888    | 1         |
| cg14215786  | WDR25;WDR25                | 4.40E-06          | 4.40E-06             | 0.106564           | -9.38401                     | T down vs N                            | 46.005  | 46.954    | 16.3301    | 1         |
| cg14216068  | HOXA3;HOXA3;HOXA3          | 0.00100332        | 0.00100332           | 4.08152            | 4.08152                      | T up vs N                              | 16.108  | 18.5277   | 18.404     | 1         |
| cg14216201  | SLC25A13;SLC25A13;SLC25A13 | 0.00010311        | 0.000103107          | 0.244761           | -4.08562                     | T down vs N                            | 26.2    | 18.5542   | 11.3307    | 1         |
| cg14216734  | MNDA                       | 1.99E-06          | 1.99E-06             | 0.131042           | -7.63115                     | T down vs N                            | 52.347  | 38.6822   | 11.8234    | 1         |
| cg14216940  | IKZF1                      | 4.72E-05          | 4.72E-05             | 5.21804            | 5.21804                      | T up vs N                              | 30.401  | 25.565    | 13.4547    | 1         |
| cg14217558  | PRDM16;PRDM16              | 0.00324666        | 0.00324666           | 0.109708           | -9.11508                     | T down vs N                            | 11.949  | 45.7424   | 61.248     | 1         |
| cg14219262  | KIAA1026                   | 1.88E-05          | 1.88E-05             | 0.301729           | -3.31423                     | T down vs N                            | 35.909  | 13.4474   | 5.99183    | 1         |
| cg14220224  | SDR16C6                    | 0.00072928        | 0.000729284          | 0.267387           | -3.7399                      | T down vs N                            | 17.351  | 16.2963   | 15.0271    | 1         |
| cg14220678  | CCDC17                     | 8.12E-05          | 8.12E-05             | 3.33465            | 3.33465                      | T up vs N                              | 27.439  | 13.5857   | 7.92185    | 1         |
| cg14222153  | SLC9A11                    | 0.00010931        | 0.000109311          | 0.327658           | -3.05196                     | T down vs N                            | 25.903  | 11.6606   | 7.20273    | 1         |
| cg14222434  | PDE10A;PDE10A              | 0.00062364        | 0.000623644          | 0.269328           | -3.71294                     | T down vs N                            | 17.981  | 16.1181   | 14.3427    | 1         |
| cg14222679  | CYP4B1;CYP4B1              | 5.98E-06          | 5.98E-06             | 0.228717           | -4.37222                     | T down vs N                            | 43.714  | 20.3848   | 7.46109    | 1         |
| cg14224203  | C9orf86;C9orf86            | 0.00044528        | 0.000445277          | 3.71691            | 3.71691                      | T up vs N                              | 19.379  | 16.1443   | 13.3296    | 1         |
| cg14230280  | PTGES                      | 7.85E-07          | 7.85E-07             | 0.192156           | -5.2041                      | T down vs N                            | 60.648  | 25.4823   | 6.72269    | 1         |
| cg14230606  | PLEKH2;LOC728819           | 1.12E-05          | 1.12E-05             | 0.306892           | -3.25847                     | T down vs N                            | 39.305  | 13.0693   | 5.32017    | 1         |
| cg14232291  | KLHL34                     | 0.00705187        | 0.00705187           | 6.8106             | 6.8106                       | T up vs N                              | 9.537   | 34.4728   | 57.8339    | 1         |
| cg14232851  | GNA14                      | 4.79E-05          | 4.79E-05             | 0.156053           | -6.40807                     | T down vs N                            | 30.314  | 32.3182   | 17.058     | 1         |
| cg14233720  | BCL11B;BCL11B              | 0.00057629        | 0.000576285          | 0.283054           | -3.53289                     | T down vs N                            | 18.303  | 14.9197   | 13.0425    | 1         |
| cg14235768  | VAX2                       | 6.86E-05          | 6.86E-05             | 0.241601           | -4.13905                     | T down vs N                            | 28.338  | 18.8983   | 10.6704    | 1         |
| cg14235846  | NXN                        | 3.02E-05          | 3.02E-05             | 0.105827           | -9.44936                     | T down vs N                            | 32.999  | 47.2455   | 22.9078    | 1         |
| cg14237550  | MST1P2                     |                   |                      |                    |                              |                                        |         |           |            |           |

| Probeset ID | UCSC_REFGENE_NAME                                    | p-value<br>(Type) | p-value (T vs.<br>N) | Ratio (T<br>vs. N) | Fold-<br>Change (T<br>vs. N) | Fold-Change (T vs.<br>N) (Description) | F(Type) | SS (Type) | SS (Error) | F (Error) |
|-------------|------------------------------------------------------|-------------------|----------------------|--------------------|------------------------------|----------------------------------------|---------|-----------|------------|-----------|
| cg14270989  | TLE6;TLE6                                            | 6.48E-05          | 6.48E-05             | 0.308968           | -3.23658                     | T down vs N                            | 28.648  | 12.9205   | 7.21613    | 1         |
| cg14273093  | FAM101A                                              | 3.16E-05          | 3.16E-05             | 0.044465           | -22.4896                     | T down vs N                            | 32.721  | 90.7684   | 44.3837    | 1         |
| cg14273126  | CFD                                                  | 2.04E-05          | 2.04E-05             | 0.283903           | -3.52233                     | T down vs N                            | 35.384  | 14.849    | 6.71443    | 1         |
| cg14273883  | PRB3                                                 | 2.33E-06          | 2.33E-06             | 0.315406           | -3.17052                     | T down vs N                            | 51.04   | 12.4708   | 3.90931    | 1         |
| cg14275842  | CHRNE;C17orf107                                      | 5.32E-05          | 5.32E-05             | 9.06012            | 9.06012                      | T up vs N                              | 29.724  | 45.4924   | 24.4881    | 1         |
| cg14277606  | BMS1P4                                               | 0.00083385        | 0.000833848          | 0.323618           | -3.09006                     | T down vs N                            | 16.823  | 11.9214   | 11.3384    | 1         |
| cg14277925  | TSPAN4;TSPAN4;TSPAN4;TSPAN4;TSP<br>AN4;TSPAN4;TSPAN4 | 0.00013383        | 0.000133827          | 0.171868           | -5.81842                     | T down vs N                            | 25.879  | 27.3379   | 15.8457    | 1         |
| cg14280171  | STRAP                                                | 0.00661562        | 0.00661562           | 0.306386           | -3.26385                     | T down vs N                            | 9.7262  | 13.1058   | 21.5595    | 1         |
| cg14280424  | IL10RB                                               | 0.00428281        | 0.00428281           | 0.153498           | -6.51474                     | T down vs N                            | 11.059  | 32.8951   | 47.5922    | 1         |
| cg14282634  | NAV1                                                 | 0.00154302        | 0.00154302           | 0.284748           | -3.51188                     | T down vs N                            | 14.509  | 14.779    | 16.298     | 1         |
| cg14283480  | EPN1;EPN1;EPN1                                       | 9.54E-06          | 9.54E-06             | 0.298936           | -3.3452                      | T down vs N                            | 40.394  | 13.657    | 5.40949    | 1         |
| cg14284211  | FKBP5;FKBP5;FKBP5;FKBP5                              | 0.00415686        | 0.00415686           | 0.286127           | -3.49496                     | T down vs N                            | 11.153  | 14.6656   | 21.0384    | 1         |
| cg14284588  | MIR548N;FKBP7;FKBP7                                  | 0.00010058        | 0.000100579          | 0.307818           | -3.24867                     | T down vs N                            | 26.327  | 13.0027   | 7.90221    | 1         |
| cg14284630  | ORST3                                                | 0.00021813        | 0.000218133          | 0.217842           | -4.59049                     | T down vs N                            | 22.547  | 21.7532   | 15.4365    | 1         |
| cg14284907  | PLAG1;PLAG1;PLAG1                                    | 2.39E-05          | 2.39E-05             | 0.32299            | -3.09607                     | T down vs N                            | 34.405  | 11.9625   | 5.56314    | 1         |
| cg14285012  | PPP3R2;GRIN3A                                        | 4.68E-06          | 4.68E-06             | 0.164167           | -6.09136                     | T down vs N                            | 45.529  | 30.5785   | 10.7461    | 1         |
| cg14286208  | KLHL33                                               | 1.21E-05          | 1.21E-05             | 5.46314            | 5.46314                      | T up vs N                              | 38.779  | 27.0053   | 11.1421    | 1         |
| cg14286682  | TPD52L3;TPD52L3;TPD52L3;TPD52L3                      | 8.42E-05          | 8.42E-05             | 0.296358           | -3.3743                      | T down vs N                            | 27.246  | 13.8536   | 8.1353     | 1         |
| cg14288049  | PBX3;PBX3;PBX3;PBX3                                  | 3.80E-08          | 3.80E-08             | 0.135135           | -7.39999                     | T down vs N                            | 95.429  | 37.52     | 6.29074    | 1         |
| cg14288848  | ZBTB22;TAPBP;TAPBP;TAPBP;ZBTB22                      | 0.0001502         | 0.000150202          | 3.37984            | 3.37984                      | T up vs N                              | 24.323  | 13.891    | 9.1378     | 1         |
| cg14293223  | GFI1B;GFI1B                                          | 0.00116076        | 0.00116076           | 0.232084           | -4.30879                     | T down vs N                            | 15.556  | 19.9829   | 20.5531    | 1         |
| cg14297444  | DNM1;DNM1                                            | 4.07E-05          | 4.07E-05             | 0.198467           | -5.03862                     | T down vs N                            | 31.246  | 24.4936   | 12.5423    | 1         |
| cg14298689  | GPC5                                                 | 2.10E-05          | 2.10E-05             | 0.30335            | -3.29652                     | T down vs N                            | 35.223  | 13.3274   | 6.05398    | 1         |
| cg14299455  | KIR3DL3                                              | 0.00056613        | 0.000566126          | 0.12352            | -8.09585                     | T down vs N                            | 24.648  | 27.3102   | 11.0802    | 1         |
| cg14299940  | PHYHD1;PHYHD1;PHYHD1                                 | 0.00088299        | 0.00088299           | 3.56318            | 3.56318                      | T up vs N                              | 16.6    | 15.1222   | 14.5761    | 1         |
| cg14300347  | ATF6B;ATF6B;FKBPL                                    | 0.00036177        | 0.000361768          | 0.113994           | -8.7724                      | T down vs N                            | 20.271  | 44.1698   | 34.863     | 1         |
| cg14301024  | LOC440839                                            | 0.00021575        | 0.000215746          | 3.6                | 3.6                          | T up vs N                              | 22.599  | 15.3679   | 10.8807    | 1         |
| cg14301212  | HCG9                                                 | 4.52E-06          | 4.52E-06             | 4.44063            | 4.44063                      | T up vs N                              | 45.805  | 20.816    | 7.27126    | 1         |
| cg14302471  | LOC154822                                            | 0.00011576        | 0.000115764          | 0.169058           | -5.91511                     | T down vs N                            | 25.613  | 29.5928   | 18.4863    | 1         |
| cg14304515  | FAM110A;FAM110A                                      | 2.50E-05          | 2.50E-05             | 3.07051            | 3.07051                      | T up vs N                              | 34.123  | 11.7876   | 5.52713    | 1         |
| cg14307853  | CKS2                                                 | 0.00167994        | 0.00167994           | 0.264783           | -3.77667                     | T down vs N                            | 14.204  | 16.539    | 18.6309    | 1         |
| cg14308612  | RAD9A                                                | 1.67E-05          | 1.67E-05             | 0.299457           | -3.33938                     | T down vs N                            | 36.679  | 13.6176   | 5.94027    | 1         |
| cg14309283  | ZBTB22;TAPBP;TAPBP;TAPBP;ZBTB22                      | 0.00031017        | 0.000310171          | 7.59803            | 7.59803                      | T up vs N                              | 20.948  | 38.5168   | 29.4188    | 1         |
| cg14311811  | DSG2                                                 | 0.00025795        | 0.000257948          | 12.2851            | 12.2851                      | T up vs N                              | 21.777  | 58.9318   | 43.2989    | 1         |
| cg14312894  | HSD17B6                                              | 3.92E-05          | 3.92E-05             | 0.247341           | -4.04299                     | T down vs N                            | 31.465  | 18.2787   | 9.29469    | 1         |
| cg14312965  | ACTL7B                                               | 0.00010589        | 0.000105886          | 0.209801           | -4.76642                     | T down vs N                            | 26.065  | 22.8401   | 14.0207    | 1         |
| cg14313748  | ANKS6                                                | 2.96E-05          | 2.96E-05             | 0.27433            | -3.64524                     | T down vs N                            | 33.105  | 15.6691   | 7.57296    | 1         |
| cg14315842  | KCNT1                                                | 0.00187925        | 0.00187925           | 0.292871           | -3.41447                     | T down vs N                            | 13.806  | 14.1245   | 16.3691    | 1         |
| cg14316629  | KIF25;KIF25                                          | 0.00090758        | 0.000907583          | 0.312885           | -3.19606                     | T down vs N                            | 16.493  | 12.6449   | 12.2669    | 1         |
| cg14317513  | SIM2;SIM2                                            | 0.00440682        | 0.00440682           | 0.330252           | -3.028                       | T down vs N                            | 10.969  | 11.4964   | 16.7692    | 1         |
| cg14319135  | ZNF735                                               | 2.51E-05          | 2.51E-05             | 0.126749           | -7.88964                     | T down vs N                            | 34.107  | 39.9607   | 18.746     | 1         |
| cg14319235  | ELTD1                                                | 0.00365596        | 0.00365596           | 3.81501            | 3.81501                      | T up vs N                              | 11.564  | 16.7914   | 23.2332    | 1         |
| cg14321245  | CCL14;CCL14;CCL14-CCL15;CCL14-<br>CCL15              | 7.73E-05          | 7.73E-05             | 0.24627            | -4.06058                     | T down vs N                            | 27.697  | 18.3925   | 10.6251    | 1         |
| cg14323910  | HLA-DQB1                                             | 0.0070491         | 0.0070491            | 0.170414           | -5.86805                     | T down vs N                            | 12.913  | 16.293    | 10.0941    | 1         |
| cg14324502  | ISCA1                                                | 0.00023029        | 0.000230288          | 0.24812            | -4.03031                     | T down vs N                            | 22.296  | 18.1966   | 13.058     | 1         |
| cg14325112  | GLIS3;GLIS3                                          | 8.80E-06          | 8.80E-06             | 0.14848            | -6.73493                     | T down vs N                            | 40.952  | 34.0724   | 13.3121    | 1         |
| cg14325930  | LMX1B                                                | 0.00270554        | 0.00270554           | 0.327039           | -3.05774                     | T down vs N                            | 12.554  | 11.7002   | 14.9122    | 1         |
| cg14326413  | PRDM8;PRDM8                                          | 2.41E-06          | 2.41E-06             | 36.6433            | 36.6433                      | T up vs N                              | 50.773  | 121.468   | 38.278     | 1         |
| cg14330206  | DNAH17                                               | 0.00028137        | 0.000281369          | 0.168798           | -5.92424                     | T down vs N                            | 21.384  | 29.6441   | 22.1808    | 1         |
| cg14331163  | RORB                                                 | 0.00128742        | 0.00128742           | 0.316623           | -3.15833                     | T down vs N                            | 15.171  | 12.3877   | 13.065     | 1         |
| cg14331858  | VTN;SEBOX                                            | 9.10E-05          | 9.10E-05             | 0.164703           | -6.07153                     | T down vs N                            | 26.844  | 30.4682   | 18.1602    | 1         |
| cg14332570  | TTC29                                                | 0.00257813        | 0.00257813           | 0.322731           | -3.09855                     | T down vs N                            | 12.716  | 11.9795   | 15.0732    | 1         |
| cg14333779  | OLFM1;OLFM1                                          | 0.00358936        | 0.00358936           | 3.07902            | 3.07902                      | T up vs N                              | 11.623  | 11.8459   | 16.3068    | 1         |
| cg14337655  | C19orf35                                             | 0.00323369        | 0.00323369           | 0.321808           | -3.10745                     | T down vs N                            | 11.963  | 12.0402   | 16.1039    | 1         |
| cg14338451  | MTRF1                                                | 0.00342288        | 0.00342288           | 0.273925           | -3.65064                     | T down vs N                            | 11.777  | 15.7049   | 21.3364    | 1         |
| cg14338590  | PLEKHA7                                              | 0.00189547        | 0.00189547           | 0.290261           | -3.44517                     | T down vs N                            | 13.776  | 14.3312   | 16.6451    | 1         |
| cg14339991  | ATG7;ATG7;ATG7                                       | 4.22E-05          | 4.22E-05             | 0.195536           | -5.11415                     | T down vs N                            | 31.031  | 24.9464   | 12.8626    | 1         |
| cg14340336  | TTC25                                                | 5.75E-05          | 5.75E-05             | 0.165397           | -6.04605                     | T down vs N                            | 29.3    | 30.3263   | 16.5606    | 1         |
| cg14340481  | GLIS3;GLIS3                                          | 7.60E-06          | 7.60E-06             | 0.180813           | -5.53058                     | T down vs N                            | 41.982  | 27.397    | 10.4414    | 1         |
| cg14341131  | KCNT1                                                | 0.00059356        | 0.000593562          | 0.302367           | -3.30724                     | T down vs N                            | 18.182  | 13.4      | 11.792     | 1         |
| cg14343548  | ADRBK1                                               | 0.00709658        | 0.00709658           | 3.08745            | 3.08745                      | T up vs N                              | 9.5184  | 11.9035   | 20.0093    | 1         |
| cg14349667  | FGF5;FGF5                                            | 1.48E-06          | 1.48E-06             | 24.2332            | 24.2332                      | T up vs N                              | 54.862  | 95.175    | 27.7572    | 1         |
| cg14349862  | ADAMTS3                                              | 0.00012234        | 0.000122338          | 0.319041           | -3.13439                     | T down vs N                            | 25.336  | 12.2243   | 7.71994    | 1         |
| cg14350382  | ASS1;ASS1                                            | 0.00114008        | 0.00114008           | 3.9479             | 3.9479                       | T up vs N                              | 15.624  | 17.6611   | 18.0867    | 1         |
| cg14351952  | PDCD1LG2                                             | 2.79E-07          | 2.79E-07             | 0.304666           | -3.28228                     | T down vs N                            | 71.074  | 13.2309   | 2.9785     | 1         |
| cg14352362  | PROKR2                                               | 2.25E-06          | 2.25E-06             | 0.180684           | -5.53453                     | T down vs N                            | 51.317  | 27.4198   | 8.5492     | 1         |
| cg14354631  | PTPRN2;PTPRN2;PTPRN2                                 | 4.88E-05          | 4.88E-05             | 0.184616           | -5.41665                     | T down vs N                            | 30.206  | 26.7341   | 14.161     | 1         |

| Probeset ID | UCSC_REFGENE_NAME       | p-value<br>(Type) | p-value (T vs.<br>N) | Ratio (T<br>vs. N) | Fold-<br>Change (T<br>vs. N) | Fold-Change (T vs.<br>N) (Description) | F(Type) | SS (Type) | SS (Error) | F (Error) |
|-------------|-------------------------|-------------------|----------------------|--------------------|------------------------------|----------------------------------------|---------|-----------|------------|-----------|
| cg14355654  | UTP23                   | 0.0003197         | 0.000319696          | 0.304708           | -3.28183                     | T down vs N                            | 20.814  | 13.2278   | 10.1684    | 1         |
| cg14356530  | HSD17B3                 | 1.69E-06          | 1.69E-06             | 0.19467            | -5.13689                     | T down vs N                            | 53.753  | 25.0822   | 7.46597    | 1         |
| cg14356799  | HLA-DPB1                | 1.46E-05          | 1.46E-05             | 0.291678           | -3.42844                     | T down vs N                            | 37.512  | 14.2186   | 6.06461    | 1         |
| cg14358088  | GMD5                    | 0.00153153        | 0.00153153           | 0.294642           | -3.39395                     | T down vs N                            | 14.536  | 13.9862   | 15.395     | 1         |
| cg14359052  | PRDM1;PRDM1             | 1.20E-06          | 1.20E-06             | 0.25317            | -3.94992                     | T down vs N                            | 56.735  | 17.6743   | 4.9844     | 1         |
| cg14359435  | USP2;USP2               | 0.000983          | 0.000983003          | 8.4261             | 8.4261                       | T up vs N                              | 16.186  | 42.5466   | 42.0582    | 1         |
| cg14359531  | PNPLA7;PNPLA7           | 0.00065877        | 0.000658765          | 0.251951           | -3.96903                     | T down vs N                            | 17.759  | 17.7987   | 16.036     | 1         |
| cg14359824  | C9orf135                | 7.55E-06          | 7.55E-06             | 11.5708            | 11.5708                      | T up vs N                              | 42.029  | 56.1507   | 21.3762    | 1         |
| cg14361672  | PKN3                    | 2.88E-05          | 2.88E-05             | 0.160083           | -6.24678                     | T down vs N                            | 33.275  | 31.4372   | 15.1163    | 1         |
| cg14362004  | ICA1;ICA1;ICA1          | 0.00121534        | 0.00121534           | 0.332366           | -3.00874                     | T down vs N                            | 15.384  | 11.3644   | 11.8191    | 1         |
| cg14363981  | EFNB2                   | 0.0059596         | 0.0059596            | 4.84893            | 4.84893                      | T up vs N                              | 10.039  | 23.345    | 37.206     | 1         |
| cg14366292  | DMBT1;DMBT1;DMBT1       | 0.00065284        | 0.000652835          | 0.299768           | -3.33592                     | T down vs N                            | 17.795  | 13.5942   | 12.2228    | 1         |
| cg14368852  | ZNF185                  | 0.00014801        | 0.000148014          | 0.262393           | -3.81108                     | T down vs N                            | 24.394  | 16.7655   | 10.9963    | 1         |
| cg14371312  | C9orf110;C9orf109       | 0.0001087         | 0.000108703          | 0.256236           | -3.90265                     | T down vs N                            | 25.931  | 17.3659   | 10.7151    | 1         |
| cg14372520  | EDA2R                   | 0.00517884        | 0.00517884           | 0.244236           | -4.0944                      | T down vs N                            | 10.467  | 18.6108   | 28.4485    | 1         |
| cg14373210  | COL12A1;COL12A1         | 3.63E-05          | 3.63E-05             | 0.307108           | -3.25618                     | T down vs N                            | 31.903  | 10.537    | 6.54665    | 1         |
| cg14373727  | LRRC20;LRRC20;LRRC20    | 0.00266248        | 0.00266248           | 0.245301           | -4.07663                     | T down vs N                            | 12.608  | 18.4962   | 23.4731    | 1         |
| cg14373873  | TTC12                   | 0.00281534        | 0.00281534           | 0.31165            | -3.20873                     | T down vs N                            | 12.421  | 12.7311   | 16.3999    | 1         |
| cg14374089  | EXOC2                   | 4.83E-05          | 4.83E-05             | 0.273021           | -3.66272                     | T down vs N                            | 30.274  | 15.7852   | 8.34263    | 1         |
| cg14374799  | NPM2                    | 8.95E-07          | 8.95E-07             | 8.70649            | 8.70649                      | T up vs N                              | 59.412  | 43.8635   | 11.8126    | 1         |
| cg14375937  | CYP26C1                 | 0.00210467        | 0.00210467           | 0.272462           | -3.67023                     | T down vs N                            | 13.41   | 15.835    | 18.893     | 1         |
| cg14376679  | PHF19                   | 0.00143331        | 0.00143331           | 7.61255            | 7.61255                      | T up vs N                              | 14.776  | 38.5894   | 41.7848    | 1         |
| cg14377594  | DMRT2;DMRT2;DMRT2       | 0.00173118        | 0.00173118           | 0.267825           | -3.73378                     | T down vs N                            | 14.096  | 16.2559   | 18.4511    | 1         |
| cg14377951  | GSTM5;GSTM5             | 8.27E-05          | 8.27E-05             | 3.79277            | 3.79277                      | T up vs N                              | 27.343  | 16.645    | 9.74005    | 1         |
| cg14381448  | SLC4A1                  | 1.23E-06          | 1.23E-06             | 0.182729           | -5.47259                     | T down vs N                            | 56.488  | 27.0603   | 7.66469    | 1         |
| cg14381945  | PCBP3;PCBP3             | 0.00439182        | 0.00439182           | 0.308527           | -3.24121                     | T down vs N                            | 10.98   | 12.952    | 18.8739    | 1         |
| cg14382835  | LPNH3                   | 0.00080624        | 0.000806243          | 0.316516           | -3.1594                      | T down vs N                            | 16.955  | 12.395    | 11.6971    | 1         |
| cg14383062  | TBCD                    | 1.60E-05          | 1.60E-05             | 0.226201           | -4.42084                     | T down vs N                            | 36.949  | 20.6915   | 8.95998    | 1         |
| cg14384158  | NELF;NELF;NELF;NELF     | 2.86E-05          | 2.86E-05             | 11.6584            | 11.6584                      | T up vs N                              | 33.306  | 56.4973   | 27.1406    | 1         |
| cg14385362  | EK6                     | 0.00105787        | 0.00105787           | 0.330244           | -3.02806                     | T down vs N                            | 15.906  | 11.4969   | 11.5648    | 1         |
| cg14388804  | JARID2                  | 0.00221897        | 0.00221897           | 0.274223           | -3.64667                     | T down vs N                            | 13.228  | 15.6785   | 18.9647    | 1         |
| cg14389081  | GPX6                    | 0.00347515        | 0.00347515           | 0.300643           | -3.32621                     | T down vs N                            | 11.728  | 13.5285   | 18.4568    | 1         |
| cg14389169  | SCLT1;C4orf33;C4orf33   | 0.00619565        | 0.00619565           | 0.273676           | -3.65396                     | T down vs N                            | 9.9223  | 15.727    | 25.3602    | 1         |
| cg14392031  | NIPSNAP3B               | 9.29E-07          | 9.29E-07             | 0.189671           | -5.27228                     | T down vs N                            | 59.074  | 25.8861   | 7.01112    | 1         |
| cg14394550  | EGR3                    | 0.00569556        | 0.00569556           | 6.50578            | 6.50578                      | T up vs N                              | 10.176  | 32.8469   | 51.644     | 1         |
| cg14394880  | PDE6B;PDE6B;PDE6B       | 0.00042871        | 0.00042871           | 0.228617           | -4.37412                     | T down vs N                            | 19.54   | 20.3968   | 16.7017    | 1         |
| cg14395060  | SLCSA1                  | 9.45E-05          | 9.45E-05             | 0.238169           | -4.1987                      | T down vs N                            | 26.649  | 19.281    | 11.5762    | 1         |
| cg14395844  | LOC100289341;MAN1B1     | 1.16E-05          | 1.16E-05             | 0.298458           | -3.35056                     | T down vs N                            | 39.042  | 13.6932   | 5.61169    | 1         |
| cg14395885  | DPM2                    | 0.00010654        | 0.000106535          | 5.53629            | 5.53629                      | T up vs N                              | 26.033  | 27.43     | 16.8584    | 1         |
| cg14398557  | PSMF1                   | 5.04E-05          | 5.04E-05             | 0.20386            | -4.90534                     | T down vs N                            | 30.026  | 23.6882   | 12.6229    | 1         |
| cg14398957  | PRC1;PRC1;PRC1          | 3.04E-05          | 3.04E-05             | 0.296792           | -3.36936                     | T down vs N                            | 32.945  | 13.8202   | 6.71186    | 1         |
| cg14399060  | HOXD4;MIR10B            | 0.00411493        | 0.00411493           | 5.44227            | 5.44227                      | T up vs N                              | 11.186  | 26.8837   | 38.455     | 1         |
| cg14399183  | GSN;GSN;GSN;GSN;GSN;GSN | 0.00013572        | 0.000135722          | 3.93577            | 3.93577                      | T up vs N                              | 24.82   | 17.5821   | 11.3342    | 1         |
| cg14401592  | ACCN5                   | 0.00021365        | 0.000213652          | 0.168078           | -5.9496                      | T down vs N                            | 22.644  | 29.7867   | 21.047     | 1         |
| cg14403200  | MAMDC2                  | 0.00079628        | 0.000796275          | 5.03297            | 5.03297                      | T up vs N                              | 17.004  | 24.4596   | 23.016     | 1         |
| cg14405526  | FAM75A1;FAM75A2         | 0.00025464        | 0.00025464           | 0.322428           | -3.10147                     | T down vs N                            | 21.836  | 11.9994   | 8.79259    | 1         |
| cg14405625  | VAV2;VAV2               | 1.56E-05          | 1.56E-05             | 0.303435           | -3.2956                      | T down vs N                            | 37.104  | 13.3212   | 5.74432    | 1         |
| cg14406005  | C8orf44                 | 0.0069377         | 0.0069377            | 0.329711           | -3.03296                     | T down vs N                            | 9.5852  | 11.5305   | 19.247     | 1         |
| cg14408173  | CLIC3                   | 3.71E-06          | 3.71E-06             | 5.32915            | 5.32915                      | T up vs N                              | 47.32   | 26.2213   | 8.86608    | 1         |
| cg14409083  | EMP1;EMP1               | 1.53E-05          | 1.53E-05             | 0.234293           | -4.26816                     | T down vs N                            | 37.244  | 19.7245   | 8.47362    | 1         |
| cg14409810  | C9orf167                | 0.0004204         | 0.0004204            | 6.93173            | 6.93173                      | T up vs N                              | 19.623  | 35.1092   | 28.6265    | 1         |
| cg14410476  | MAL;MAL;MAL;MAL         | 0.00014439        | 0.000144391          | 6.56879            | 6.56879                      | T up vs N                              | 24.516  | 33.1859   | 21.6587    | 1         |
| cg14413533  | WFDC6                   | 2.52E-06          | 2.52E-06             | 0.203187           | -4.92158                     | T down vs N                            | 50.389  | 23.7868   | 7.55305    | 1         |
| cg14414873  | C9orf152                | 0.00030768        | 0.000307683          | 0.235523           | -4.24587                     | T down vs N                            | 20.984  | 19.5824   | 14.9314    | 1         |
| cg14417067  | C9orf173                | 3.50E-05          | 3.50E-05             | 0.243738           | -4.10277                     | T down vs N                            | 32.111  | 18.6648   | 9.30003    | 1         |
| cg14417329  | SLC16A3;SLC16A3         | 3.25E-05          | 3.25E-05             | 3.99841            | 3.99841                      | T up vs N                              | 32.548  | 17.9897   | 8.84338    | 1         |
| cg14419141  | FAM26F                  | 0.00502365        | 0.00502365           | 4.71321            | 4.71321                      | T up vs N                              | 10.561  | 22.5129   | 34.1077    | 1         |
| cg14420108  | GALT                    | 0.00062163        | 0.000621631          | 3.40714            | 3.40714                      | T up vs N                              | 17.994  | 14.0752   | 12.5157    | 1         |
| cg14422240  | FTSJD2                  | 0.00062908        | 0.000629079          | 0.29061            | -3.44104                     | T down vs N                            | 17.945  | 14.3034   | 12.7529    | 1         |
| cg14422827  | DMRT2;DMRT2;DMRT2       | 0.004954          | 0.004954             | 3.33189            | 3.33189                      | T up vs N                              | 10.604  | 13.5669   | 20.4706    | 1         |
| cg14422922  | OR2B11                  | 0.00057752        | 0.000577523          | 0.329193           | -3.03774                     | T down vs N                            | 18.294  | 11.5632   | 10.1132    | 1         |
| cg14426174  | SERPINB7                | 0.00081185        | 0.000811854          | 0.324719           | -3.07959                     | T down vs N                            | 16.927  | 11.8498   | 11.2005    | 1         |
| cg14426428  | AIM1                    | 3.62E-05          | 3.62E-05             | 0.143276           | -6.97956                     | T down vs N                            | 31.916  | 35.3591   | 17.7261    | 1         |
| cg14426510  | LUC7L3;LUC7L3           | 1.25E-06          | 1.25E-06             | 0.329924           | -3.031                       | T down vs N                            | 56.379  | 11.517    | 3.26848    | 1         |
| cg14426660  | NET1;NET1               | 0.00028508        | 0.000285081          | 5.25185            | 5.25185                      | T up vs N                              | 21.325  | 25.7652   | 19.3317    | 1         |
| cg14430141  | TNR                     | 1.60E-05          | 1.60E-05             | 7.70203            | 7.70203                      | T up vs N                              | 36.936  | 39.035    | 16.9091    | 1         |
| cg14431573  | BCL2L10                 | 0.00109808        | 0.00109808           | 3.45899            | 3.45899                      | T up vs N                              | 15.765  | 14.4241   | 14.6392    | 1         |
| cg14432910  | LBXCOR1                 | 1.76E-05          | 1.76E-05             | 6.11007            | 6.11007                      | T up vs N                              | 36.317  | 30.6824   | 13.5177    | 1         |
| cg14434922  | DMRT3                   | 0.00043571        | 0.000435705          | 0.228085           | -4.38433                     | T down vs N                            | 19.471  | 20.4613   | 16.8138    | 1         |
| cg14435098  | KCNT1                   | 0.00094697        | 0.000946968          | 0.326161           | -3.06597                     | T down vs N                            | 16.329  | 11.7565   | 11.5196    | 1         |
| cg14435109  | SGPP2                   | 0.00044952        | 0.000449519          | 5.3138             | 5.3138                       | T up vs N                              | 19.339  | 26.1309   | 21.6198    | 1         |

| Probeset ID | UCSC_REFGENE_NAME               | p-value<br>(Type) | p-value (T vs.<br>N) | Ratio (T<br>vs. N) | Fold-<br>Change (T<br>vs. N) | Fold-Change (T vs.<br>N) (Description) | F(Type) | SS (Type) | SS (Error) | F (Error) |
|-------------|---------------------------------|-------------------|----------------------|--------------------|------------------------------|----------------------------------------|---------|-----------|------------|-----------|
| cg14435644  | SFRP2                           | 0.00225646        | 0.00225646           | 0.24044            | -4.15905                     | T down vs N                            | 13.17   | 19.0268   | 23.1154    | 1         |
| cg14435645  | HRNBP3                          | 0.00325542        | 0.00325542           | 0.254209           | -3.93377                     | T down vs N                            | 11.941  | 17.569    | 23.5419    | 1         |
| cg14439629  | PAX6;PAX6;PAX6                  | 0.00103998        | 0.00103998           | 3.3144             | 3.3144                       | T up vs N                              | 15.971  | 13.4486   | 13.4732    | 1         |
| cg14440664  | PDCD1LG2                        | 8.92E-07          | 8.92E-07             | 0.324305           | -3.08352                     | T down vs N                            | 59.451  | 11.8766   | 3.19634    | 1         |
| cg14441276  | LTA;LTA                         | 2.57E-07          | 2.57E-07             | 0.157815           | -6.33652                     | T down vs N                            | 71.951  | 31.9286   | 7.10008    | 1         |
| cg14442557  | ANKRD42                         | 0.0001146         | 0.0001146            | 0.26225            | -3.81315                     | T down vs N                            | 25.664  | 16.7791   | 10.4609    | 1         |
| cg14446622  | CORO2A;CORO2A                   | 0.00054242        | 0.000542415          | 0.323946           | -3.08694                     | T down vs N                            | 18.552  | 11.9      | 10.2629    | 1         |
| cg14449180  | HCG4P6                          | 0.00374908        | 0.00374908           | 15.9784            | 15.9784                      | T up vs N                              | 11.483  | 71.93     | 100.227    | 1         |
| cg14450766  | SLC22A2                         | 0.00017075        | 0.000170749          | 0.313785           | -3.18689                     | T down vs N                            | 23.703  | 12.5824   | 8.4933     | 1         |
| cg14452299  | CACNA1B                         | 0.00013943        | 0.000139434          | 0.317571           | -3.1489                      | T down vs N                            | 24.687  | 12.3234   | 7.98699    | 1         |
| cg14454477  | PLEKHH2;LOC728819               | 0.00019898        | 0.000198975          | 0.235536           | -4.24564                     | T down vs N                            | 22.977  | 19.5809   | 13.6352    | 1         |
| cg14454798  | CPEB4                           | 0.0009085         | 0.000908499          | 0.195825           | -5.1066                      | T down vs N                            | 16.489  | 24.9013   | 24.1626    | 1         |
| cg14455319  | ANKK1                           | 0.00093616        | 0.000936163          | 3.557              | 3.557                        | T up vs N                              | 16.373  | 15.0809   | 14.7371    | 1         |
| cg14455403  | LMCD1                           | 0.00020537        | 0.000205374          | 0.130596           | -7.6572                      | T down vs N                            | 22.829  | 38.812    | 27.2025    | 1         |
| cg14455991  | CASK;CASK;GPR82;CASK            | 7.79E-05          | 7.79E-05             | 0.221382           | -4.51709                     | T down vs N                            | 27.657  | 21.2955   | 12.3198    | 1         |
| cg14456034  | SEC16A                          | 3.25E-05          | 3.25E-05             | 0.333125           | -3.00187                     | T down vs N                            | 32.546  | 11.3173   | 5.56372    | 1         |
| cg14456143  | GEN1;GEN1                       | 0.0001407         | 0.000140701          | 0.300111           | -3.3321                      | T down vs N                            | 24.642  | 13.5684   | 8.80978    | 1         |
| cg14457284  | GFI1B;GFI1B                     | 0.00085524        | 0.000855242          | 0.301607           | -3.31557                     | T down vs N                            | 16.724  | 13.4565   | 12.8741    | 1         |
| cg14457782  | WNK4                            | 7.80E-05          | 7.80E-05             | 17.1807            | 17.1807                      | T up vs N                              | 27.651  | 75.7453   | 43.8295    | 1         |
| cg14458068  | PCDHGA4;PCDHGA6;PCDHGA1;PCDHG   | 0.00020337        | 0.000203371          | 3.40078            | 3.40078                      | T up vs N                              | 22.874  | 14.0323   | 9.81519    | 1         |
|             | A5;PCDHGB1;PCDHGB4;PCDHGA3;PC   |                   |                      |                    |                              |                                        |         |           |            |           |
| cg14458731  | 7                               | 2.90E-05          | 2.90E-05             | 0.204047           | -4.90082                     | T down vs N                            | 33.241  | 23.6608   | 11.3887    | 1         |
| cg14459011  | COQ4;TRUB2                      | 0.00335123        | 0.00335123           | 0.331366           | -3.01781                     | T down vs N                            | 11.846  | 11.4266   | 15.4337    | 1         |
| cg14459668  | NHEDC2                          | 0.00485276        | 0.00485276           | 0.274822           | -3.63872                     | T down vs N                            | 10.668  | 15.6257   | 23.4356    | 1         |
| cg14460195  | C10orf11                        | 0.00485276        | 0.00485276           | 0.274822           | -3.63872                     | T down vs N                            | 10.668  | 15.6257   | 23.4356    | 1         |
| cg14460195  | MCF2L;MCF2L                     | 5.58E-06          | 5.58E-06             | 4.85848            | 4.85848                      | T up vs N                              | 44.228  | 23.4032   | 8.46635    | 1         |
| cg14460735  | CNST;TFB2M;CNST                 | 2.77E-05          | 2.77E-05             | 0.314276           | -3.18191                     | T down vs N                            | 33.498  | 12.5485   | 5.99358    | 1         |
| cg14461974  | TSSC1                           | 0.00084444        | 0.00084444           | 0.128992           | -7.75244                     | T down vs N                            | 16.773  | 39.2848   | 37.4736    | 1         |
| cg14462124  | STK17B                          | 1.59E-05          | 1.59E-05             | 0.158117           | -6.32444                     | T down vs N                            | 36.962  | 31.8626   | 13.7927    | 1         |
| cg14462779  | DUPD1                           | 0.00013912        | 0.000139123          | 4.55127            | 4.55127                      | T up vs N                              | 24.698  | 21.509    | 13.9341    | 1         |
| cg14463725  | ANKRD58;ANKRD58                 | 0.00491123        | 0.00491123           | 4.49257            | 4.49257                      | T up vs N                              | 10.631  | 21.142    | 31.8198    | 1         |
| cg14464052  | ASB18                           | 0.00035021        | 0.000350205          | 0.260427           | -3.83985                     | T down vs N                            | 20.413  | 16.9545   | 13.2892    | 1         |
| cg14468280  | ZNF1                            | 0.00161968        | 0.00161968           | 3.41091            | 3.41091                      | T up vs N                              | 14.334  | 14.1006   | 15.7391    | 1         |
| cg14468856  | TPK1;TPK1                       | 6.92E-05          | 6.92E-05             | 0.234299           | -4.26806                     | T down vs N                            | 28.293  | 19.7238   | 11.1542    | 1         |
| cg14469070  | BLCAP;BLCAP;BLCAP;BLCAP;NNAT;NN | 4.26E-05          | 4.26E-05             | 3.11695            | 3.11695                      | T up vs N                              | 30.986  | 12.1052   | 6.25062    | 1         |
|             | AT;BLCAP                        |                   |                      |                    |                              |                                        |         |           |            |           |
| cg14470851  | RDH11                           | 0.0007172         | 0.000717203          | 0.166416           | -6.00903                     | T down vs N                            | 17.418  | 30.1197   | 27.6677    | 1         |
| cg14472390  | PCDHGA4;PCDHGA2;PCDHGB2;PCDHG   | 0.00026231        | 0.00026231           | 3.10033            | 3.10033                      | T up vs N                              | 21.701  | 11.9916   | 8.84153    | 1         |
|             | A1;PCDHGB1;PCDHGA3;PCDHGB2      |                   |                      |                    |                              |                                        |         |           |            |           |
| cg14472778  | CLCN6;CLCN6;CLCN6;CLCN6;MTHFR   | 5.95E-06          | 5.95E-06             | 0.177569           | -5.63162                     | T down vs N                            | 43.755  | 27.98     | 10.2316    | 1         |
| cg14473643  | ZBTB22;TAPBP;TAPBP;TAPBP;ZBTB22 | 0.00016775        | 0.000167746          | 4.09026            | 4.09026                      | T up vs N                              | 23.788  | 18.5841   | 12.4997    | 1         |
| cg14475381  | MGMT                            | 2.14E-06          | 2.14E-06             | 0.305345           | -3.27498                     | T down vs N                            | 51.731  | 13.1813   | 4.07688    | 1         |
| cg14478589  | GSN;GSN;GSN;GSN;GSN;GSN;GSN;GS  | 1.32E-05          | 1.32E-05             | 0.243108           | -4.1134                      | T down vs N                            | 38.209  | 18.7333   | 7.84464    | 1         |
|             | N                               |                   |                      |                    |                              |                                        |         |           |            |           |
| cg14479947  | PAK6;C15orf56;PAK6;PAK6         | 9.96E-05          | 9.96E-05             | 3.14011            | 3.14011                      | T up vs N                              | 26.379  | 12.2634   | 7.43828    | 1         |
| cg14480343  | POLG;POLG                       | 0.00026278        | 0.00026278           | 0.21339            | -4.68626                     | T down vs N                            | 21.692  | 22.3467   | 16.4826    | 1         |
| cg14481208  | RTKN                            | 7.15E-05          | 7.15E-05             | 10.6392            | 10.6392                      | T up vs N                              | 28.116  | 52.3668   | 29.8004    | 1         |
| cg14481222  | BIRC3;BIRC3                     | 4.83E-07          | 4.83E-07             | 0.239836           | -4.16951                     | T down vs N                            | 65.375  | 19.0939   | 4.67308    | 1         |
| cg14482308  | KCNS3                           | 0.00036743        | 0.000367434          | 7.35798            | 7.35798                      | T up vs N                              | 20.204  | 37.3069   | 29.5447    | 1         |
| cg14482313  | KRT7                            | 7.98E-06          | 7.98E-06             | 19.661             | 19.661                       | T up vs N                              | 41.639  | 83.0991   | 31.9312    | 1         |
| cg14482569  | ZBTB44                          | 0.00045531        | 0.000455307          | 4.0985             | 4.0985                       | T up vs N                              | 19.923  | 17.541    | 13.2069    | 1         |
| cg14482968  | COL5A1                          | 8.48E-06          | 8.48E-06             | 0.214558           | -4.66075                     | T down vs N                            | 41.215  | 22.189    | 8.61394    | 1         |
| cg14485357  | NODAL                           | 9.84E-06          | 9.84E-06             | 3.24319            | 3.24319                      | T up vs N                              | 40.178  | 12.9655   | 5.16324    | 1         |
| cg14487271  | WWP1                            | 2.11E-05          | 2.11E-05             | 0.255182           | -3.91877                     | T down vs N                            | 35.165  | 17.4711   | 7.94929    | 1         |
| cg14487379  | DDX31                           | 0.00334449        | 0.00334449           | 0.285858           | -3.49825                     | T down vs N                            | 11.852  | 14.6876   | 19.8274    | 1         |
| cg14489049  | C9orf171                        | 6.44E-05          | 6.44E-05             | 3.57971            | 3.57971                      | T up vs N                              | 28.675  | 15.2326   | 8.49954    | 1         |
| cg14490025  | TFEB;TFEB                       | 0.00261998        | 0.00261998           | 0.272676           | -3.66735                     | T down vs N                            | 12.662  | 15.8159   | 19.9857    | 1         |
| cg14491667  | TMOD1;TMOD1                     | 0.00233186        | 0.00233186           | 0.313544           | -3.18934                     | T down vs N                            | 13.057  | 12.5991   | 15.4386    | 1         |
| cg14492302  | FLJ36000                        | 6.36E-05          | 6.36E-05             | 0.313099           | -3.19388                     | T down vs N                            | 28.743  | 12.63     | 7.0306     | 1         |
| cg14493612  | TBC1D25                         | 3.76E-07          | 3.76E-07             | 0.2417             | -4.13737                     | T down vs N                            | 67.935  | 18.8875   | 4.44839    | 1         |
| cg14494733  | NOTCH1                          | 5.99E-05          | 5.99E-05             | 0.251509           | -3.97601                     | T down vs N                            | 29.074  | 17.8441   | 9.8201     | 1         |
| cg14494812  | TOB1                            | 0.00387754        | 0.00387754           | 3.02771            | 3.02771                      | T up vs N                              | 11.375  | 11.4945   | 16.1684    | 1         |
| cg14496048  | CEL                             | 4.83E-06          | 4.83E-06             | 0.325726           | -3.07007                     | T down vs N                            | 45.306  | 11.7846   | 4.16182    | 1         |
| cg14496282  | PDGFA;PDGFA                     | 0.00209704        | 0.00209704           | 0.235242           | -4.25095                     | T down vs N                            | 13.423  | 19.6148   | 23.3807    | 1         |
| cg14497841  | RALGPS1                         | 5.32E-05          | 5.32E-05             | 0.288716           | -3.46361                     | T down vs N                            | 29.726  | 14.4552   | 7.78045    | 1         |
| cg14498592  | KCNQ2;KCNQ2;KCNQ2;KCNQ2;KCNQ2   | 0.00128651        | 0.00128651           | 3.92168            | 3.92168                      | T up vs N                              | 15.173  | 17.4902   | 18.4433    | 1         |
|             | KEL                             |                   |                      |                    |                              |                                        |         |           |            |           |
| cg14498745  |                                 | 5.00E-05          | 5.00E-05             | 0.241662           | -4.13801                     | T down vs N                            | 30.071  | 18.8917   | 10.0518    | 1         |

| Probeset ID | UCSC_REFGENE_NAME                 | p-value<br>(Type) | p-value (T vs.<br>N) | Ratio (T<br>vs. N) | Fold-<br>Change (T<br>vs. N) | Fold-Change (T vs.<br>N) (Description) | F(Type) | SS (Type) | SS (Error) | F (Error) |
|-------------|-----------------------------------|-------------------|----------------------|--------------------|------------------------------|----------------------------------------|---------|-----------|------------|-----------|
| cg14499385  | SLC40A1                           | 3.52E-05          | 3.52E-05             | 4.42151            | 4.42151                      | T up vs N                              | 32.077  | 20.6957   | 10.323     | 1         |
| cg1449959   | DAXX;DAXX;DAXX;DAXX               | 0.00267097        | 0.00267097           | 0.137827           | -7.25547                     | T down vs N                            | 12.597  | 36.7843   | 46.7218    | 1         |
| cg14503564  | LDB2;LDB2                         | 6.80E-05          | 6.80E-05             | 0.193199           | -5.17601                     | T down vs N                            | 28.382  | 25.3153   | 14.2714    | 1         |
| cg14504418  | BIRC3;BIRC3                       | 0.00016137        | 0.000161371          | 0.210646           | -4.74731                     | T down vs N                            | 23.975  | 22.7227   | 15.1644    | 1         |
| cg14504586  | MED27                             | 1.75E-05          | 1.75E-05             | 0.282244           | -3.54303                     | T down vs N                            | 36.373  | 14.9876   | 6.59284    | 1         |
| cg14504826  | KRT27                             | 0.00052718        | 0.000527178          | 0.191047           | -5.23433                     | T down vs N                            | 18.67   | 25.6615   | 21.9913    | 1         |
| cg14505298  | AGAP1;AGAP1                       | 0.00058913        | 0.000589129          | 0.308009           | -3.24665                     | T down vs N                            | 18.213  | 12.989    | 11.411     | 1         |
| cg14507014  | WNT5A                             | 8.01E-05          | 8.01E-05             | 0.162511           | -6.15344                     | T down vs N                            | 27.511  | 30.9226   | 17.9844    | 1         |
| cg14508633  | SLC26A5;SLC26A5;SLC26A5;SLC26A5;S | 4.03E-05          | 4.03E-05             | 0.241632           | -4.13853                     | T down vs N                            | 31.304  | 18.895    | 9.65745    | 1         |
|             | LC26A5                            |                   |                      |                    |                              |                                        |         |           |            |           |
| cg14511156  | OSCAR;OSCAR;OSCAR;OSCAR;OSCAR;    | 2.07E-05          | 2.07E-05             | 0.304091           | -3.28849                     | T down vs N                            | 35.296  | 13.273    | 6.01672    | 1         |
|             | OR51A2                            |                   |                      |                    |                              |                                        |         |           |            |           |
| cg14511647  | OR51A2                            | 0.00038374        | 0.000383735          | 0.228258           | -4.38101                     | T down vs N                            | 20.016  | 20.4403   | 16.3396    | 1         |
| cg14511652  | FIBCD1;FIBCD1                     | 0.00399973        | 0.00399973           | 0.297098           | -3.3659                      | T down vs N                            | 11.276  | 13.7969   | 19.5773    | 1         |
| cg14512203  | CPSF3L                            | 0.00183763        | 0.00183763           | 0.306014           | -3.26783                     | T down vs N                            | 13.885  | 13.1328   | 15.1333    | 1         |
| cg14514716  | TANC1;TANC1                       | 5.57E-05          | 5.57E-05             | 0.273279           | -3.65926                     | T down vs N                            | 29.474  | 15.7622   | 8.55668    | 1         |
| cg14514813  | PCDHA6;PCDHA2;PCDHA1;PCDHA9;PC    | 2.58E-05          | 2.58E-05             | 4.02146            | 4.02146                      | T up vs N                              | 33.939  | 18.1392   | 8.55139    | 1         |
|             | DHA7;PCDHA1;PCDHA6;PCDHA5;PCD     |                   |                      |                    |                              |                                        |         |           |            |           |
| cg14514991  | HA11;PCDHA11;PCDHA10;PCDHA3;      | 0.00011305        | 0.000113051          | 0.187429           | -5.33536                     | T down vs N                            | 25.732  | 26.2577   | 16.3266    | 1         |
| cg14515517  | OR6N1                             | 1.68E-05          | 1.68E-05             | 0.216715           | -4.61435                     | T down vs N                            | 36.631  | 21.9015   | 9.56627    | 1         |
| cg14517119  | MYO3A                             | 0.00033048        | 0.000330484          | 0.233067           | -4.29062                     | T down vs N                            | 20.668  | 19.8674   | 15.3806    | 1         |
| cg14517756  | HCN1                              | 1.68E-05          | 1.68E-05             | 0.315434           | -3.17023                     | T down vs N                            | 36.617  | 12.4688   | 5.44836    | 1         |
| cg14523054  | ZNF37A;ZNF37A                     | 0.00316465        | 0.00316465           | 0.285016           | -3.50857                     | T down vs N                            | 12.033  | 14.7569   | 19.6213    | 1         |
| cg14524956  | GAPVD1                            | 0.00091414        | 0.000914136          | 0.291554           | -3.42989                     | T down vs N                            | 16.465  | 14.2284   | 13.8264    | 1         |
| cg14524975  | USH2A                             | 0.00014381        | 0.000143813          | 0.215411           | -4.64228                     | T down vs N                            | 24.535  | 22.0747   | 14.3955    | 1         |
| cg14525610  | ITGB7                             | 0.00610082        | 0.00610082           | 3.37742            | 3.37742                      | T up vs N                              | 9.9686  | 13.8747   | 22.2693    | 1         |
|             | SLCO1C1;SLCO1C1;SLCO1C1;SLCO1C1   |                   |                      |                    |                              |                                        |         |           |            |           |
| cg14528046  | PHF17;PHF17                       | 0.00033501        | 0.00033501           | 0.302242           | -3.3086                      | T down vs N</                          |         |           |            |           |

| Probeset ID                                                                             | UCSC_REFGENE_NAME                                                              | p-value<br>(Type) | p-value (T vs.<br>N) | Ratio (T<br>vs. N) | Fold-<br>Change (T<br>vs. N) | Fold-Change (T vs.<br>N) (Description) | F(Type) | SS (Type) | SS (Error) | F (Error) |
|-----------------------------------------------------------------------------------------|--------------------------------------------------------------------------------|-------------------|----------------------|--------------------|------------------------------|----------------------------------------|---------|-----------|------------|-----------|
| cg14560703                                                                              | RAPGEF1;RAPGEF1                                                                | 0.00028426        | 0.000284263          | 0.328008           | -3.04871                     | T down vs N                            | 21.338  | 11.6383   | 8.72698    | 1         |
| cg14563260                                                                              | LPAR1;LPAR1                                                                    | 0.0002033         | 0.000203295          | 4.0854             | 4.0854                       | T up vs N                              | 22.876  | 18.5528   | 12.9762    | 1         |
| cg14563485                                                                              | ZFP14                                                                          | 0.00035003        | 0.000350031          | 0.293075           | -3.41209                     | T down vs N                            | 20.415  | 14.1085   | 11.0573    | 1         |
| cg14563921                                                                              | AGBL1                                                                          | 0.00010742        | 0.000107415          | 0.287342           | -3.48017                     | T down vs N                            | 25.992  | 14.5663   | 8.96681    | 1         |
| cg14564161                                                                              | C9orf129                                                                       | 6.01E-05          | 6.01E-05             | 0.262395           | -3.81105                     | T down vs N                            | 29.057  | 16.7653   | 9.23182    | 1         |
| cg14566901                                                                              | OR9Q1                                                                          | 5.39E-05          | 5.39E-05             | 0.240089           | -4.16513                     | T down vs N                            | 29.653  | 19.0658   | 10.2876    | 1         |
| PCDHGA4;PCDHGA6;PCDHGA1;PCDHGA5;PCDHGB1;PCDHGB4;PCDHGA3;PCDHGA2;PCDHGA8;PCDHGA7;PCDHGB2 |                                                                                |                   |                      |                    |                              |                                        |         |           |            |           |
| cg14566959                                                                              | IER2                                                                           | 0.00036586        | 0.000365856          | 0.27403            | -3.64924                     | T down vs N                            | 20.222  | 15.6956   | 12.4184    | 1         |
| cg14567917                                                                              | C10orf11                                                                       | 0.00098408        | 0.000984075          | 0.299983           | -3.33353                     | T down vs N                            | 16.182  | 13.578    | 13.4257    | 1         |
| cg14569837                                                                              | OR5A51                                                                         | 1.46E-05          | 1.46E-05             | 0.259245           | -3.85735                     | T down vs N                            | 37.533  | 17.0694   | 7.27652    | 1         |
| cg14571619                                                                              | ABI3BP                                                                         | 5.23E-06          | 5.23E-06             | 0.267167           | -3.74298                     | T down vs N                            | 44.705  | 16.3167   | 5.83971    | 1         |
| cg14571622                                                                              | NLRP8                                                                          | 0.00464744        | 0.00464744           | 0.216521           | -4.61849                     | T down vs N                            | 10.803  | 21.9272   | 32.477     | 1         |
| cg14573356                                                                              | STK24;STK24                                                                    | 0.00070909        | 0.000709091          | 0.261972           | -3.8172                      | T down vs N                            | 17.463  | 16.8058   | 15.3976    | 1         |
| cg14573833                                                                              | LHX3;LHX3                                                                      | 7.20E-06          | 7.20E-06             | 0.132396           | -7.55308                     | T down vs N                            | 42.374  | 38.2917   | 14.4587    | 1         |
| cg14574489                                                                              | SLC9A9                                                                         | 8.18E-05          | 8.18E-05             | 0.251843           | -3.97072                     | T down vs N                            | 27.401  | 17.8097   | 10.3997    | 1         |
| cg14574951                                                                              | ERC2                                                                           | 0.00013708        | 0.000137082          | 0.332379           | -3.00862                     | T down vs N                            | 24.771  | 11.3636   | 7.34003    | 1         |
| cg14575739                                                                              | LILRA2;LILRA2                                                                  | 9.92E-05          | 9.92E-05             | 0.19163            | -5.21839                     | T down vs N                            | 26.4    | 25.5671   | 15.4953    | 1         |
| cg14576824                                                                              | RPS6KC1;RPS6KC1                                                                | 0.00140422        | 0.00140422           | 0.213277           | -4.68874                     | T down vs N                            | 14.851  | 22.362    | 24.0917    | 1         |
| cg14579051                                                                              | COL9A1                                                                         | 8.67E-06          | 8.67E-06             | 0.284086           | -3.52007                     | T down vs N                            | 41.055  | 14.8339   | 5.78103    | 1         |
| cg14580628                                                                              | NNT;NNT<br>LOC729991;RFXANK;LOC729991-<br>MEF2B;LOC729991-<br>MEF2B;LOC729991- | 0.00042288        | 0.000422878          | 0.25469            | -3.92635                     | T down vs N                            | 19.598  | 17.5206   | 14.3038    | 1         |
| cg14580737                                                                              | MEF2B;LOC729991;RFXANK                                                         | 0.00017137        | 0.000171369          | 0.22146            | -4.51548                     | T down vs N                            | 23.686  | 21.2855   | 14.3785    | 1         |
| cg14582452                                                                              | SRA1                                                                           | 0.00023074        | 0.000230742          | 0.314324           | -3.18144                     | T down vs N                            | 22.287  | 12.5452   | 9.00621    | 1         |
| cg14582550                                                                              | C9orf3                                                                         | 0.00397118        | 0.00397118           | 3.20692            | 3.20692                      | T up vs N                              | 11.299  | 12.7187   | 18.0111    | 1         |
| cg14582845                                                                              | STX8                                                                           | 1.92E-05          | 1.92E-05             | 0.224681           | -4.45075                     | T down vs N                            | 35.768  | 20.8797   | 9.33993    | 1         |
| cg14583225                                                                              | ACLY;ACLY                                                                      | 0.00025224        | 0.000252236          | 0.273998           | -3.64966                     | T down vs N                            | 21.879  | 15.6984   | 11.4803    | 1         |
| cg14583999                                                                              | TMEM111                                                                        | 2.58E-05          | 2.58E-05             | 0.255534           | -3.91337                     | T down vs N                            | 33.932  | 17.4359   | 8.22169    | 1         |
| cg14585967                                                                              | 1-Dec                                                                          | 5.50E-05          | 5.50E-05             | 0.194839           | -5.13244                     | T down vs N                            | 29.542  | 25.0556   | 13.57      | 1         |
| cg14588307                                                                              | SLC6A3                                                                         | 0.00071979        | 0.000719785          | 0.297653           | -3.35962                     | T down vs N                            | 17.404  | 13.7544   | 12.6452    | 1         |
| cg14588606                                                                              | KRTAP1-5                                                                       | 0.00012182        | 0.000121824          | 0.203384           | -4.91681                     | T down vs N                            | 25.357  | 23.7579   | 14.9912    | 1         |
| cg14589553                                                                              | EXD3                                                                           | 0.00129364        | 0.00129364           | 0.323961           | -3.08679                     | T down vs N                            | 15.153  | 11.899    | 12.5643    | 1         |
| cg14591352                                                                              | C13orf28                                                                       | 0.00231207        | 0.00231207           | 0.320975           | -3.11551                     | T down vs N                            | 13.086  | 12.0954   | 14.7883    | 1         |
| cg14591419                                                                              | TEX101;TEX101                                                                  | 2.50E-05          | 2.50E-05             | 0.120627           | -8.29001                     | T down vs N                            | 34.126  | 41.899    | 19.6442    | 1         |
| cg14592066                                                                              | EMILIN2                                                                        | 8.52E-06          | 8.52E-06             | 0.262002           | -3.81676                     | T down vs N                            | 41.177  | 16.8029   | 6.5291     | 1         |
| cg14595003                                                                              | TRH                                                                            | 2.67E-05          | 2.67E-05             | 23.0253            | 23.0253                      | T up vs N                              | 33.728  | 92.1464   | 43.7129    | 1         |
| cg14597388                                                                              | GZMK                                                                           | 7.81E-05          | 7.81E-05             | 0.174674           | -5.72496                     | T down vs N                            | 27.644  | 28.5148   | 16.5043    | 1         |
| cg14598387                                                                              | OR1N1                                                                          | 4.17E-06          | 4.17E-06             | 0.267969           | -3.73178                     | T down vs N                            | 46.413  | 16.2426   | 5.59935    | 1         |
| cg14599596                                                                              | FUT5                                                                           | 0.00012306        | 0.00012306           | 0.234999           | -4.25534                     | T down vs N                            | 25.306  | 19.6428   | 12.4193    | 1         |
| cg14600987                                                                              | TNNT3;TNNT3;TNNT3;TNNT3                                                        | 0.00045501        | 0.00045501           | 0.271651           | -3.68119                     | T down vs N                            | 19.287  | 15.9077   | 13.1966    | 1         |
| cg14602087                                                                              | ZNF703                                                                         | 0.00137369        | 0.00137369           | 0.203607           | -4.91141                     | T down vs N                            | 14.932  | 23.7251   | 25.4224    | 1         |
| cg14604007                                                                              | KCNT1                                                                          | 0.00147183        | 0.00147183           | 0.264632           | -3.77883                     | T down vs N                            | 14.68   | 16.5532   | 18.0418    | 1         |
| cg14604522                                                                              | ADAMTS2                                                                        | 0.00032353        | 0.000323534          | 0.23361            | -4.28063                     | T down vs N                            | 20.761  | 19.8039   | 15.2622    | 1         |
| cg14606431                                                                              | VAX2                                                                           | 6.52E-05          | 6.52E-05             | 0.211661           | -4.72453                     | T down vs N                            | 28.614  | 22.5827   | 12.6275    | 1         |
| cg14608275                                                                              | NCEH1;NCEH1;NCEH1;NCEH1                                                        | 3.84E-06          | 3.84E-06             | 0.257932           | -3.877                       | T down vs N                            | 47.048  | 17.1981   | 5.84873    | 1         |
| cg14608770                                                                              | NXNL1                                                                          | 0.00062619        | 0.000626194          | 0.130735           | -7.64905                     | T down vs N                            | 17.964  | 38.7714   | 34.5327    | 1         |
| cg14614094                                                                              | EXOSC2                                                                         | 0.00022014        | 0.000220138          | 7.03254            | 7.03254                      | T up vs N                              | 22.505  | 35.6348   | 25.3348    | 1         |
| cg14617041                                                                              | TMEM171;TMEM171                                                                | 0.00033259        | 0.000332594          | 3.8002             | 3.8002                       | T up vs N                              | 20.639  | 16.694    | 12.9414    | 1         |
| cg14618923                                                                              | FOXO3;FOXO3                                                                    | 0.00549667        | 0.00549667           | 0.305929           | -3.26874                     | T down vs N                            | 10.285  | 13.139    | 20.4406    | 1         |
| cg14621053                                                                              | ADAM12;ADAM12                                                                  | 0.00184623        | 0.00184623           | 16.6011            | 16.6011                      | T up vs N                              | 13.869  | 73.9282   | 85.2908    | 1         |
| cg14621217                                                                              | B3GNTL1                                                                        | 0.00039329        | 0.000393285          | 0.249781           | -4.00351                     | T down vs N                            | 19.909  | 18.0228   | 14.4838    | 1         |
| cg14621323                                                                              | PFN3;PFN3                                                                      | 0.00015912        | 0.000159124          | 6.34332            | 6.34332                      | T up vs N                              | 24.043  | 31.9657   | 21.2727    | 1         |
| PCDHA6;PCDHA2;PCDHA1;PCDHA7;PCDHA1;PCDHA6;PCDHA5;PCDHA3;PCDHA4;PCDHA7                   |                                                                                |                   |                      |                    |                              |                                        |         |           |            |           |
| cg14622069                                                                              | HA4;PCDHA7                                                                     | 8.18E-05          | 8.18E-05             | 3.06664            | 3.06664                      | T up vs N                              | 27.401  | 11.7612   | 6.86771    | 1         |
| cg14622549                                                                              | EP400                                                                          | 0.00501822        | 0.00501822           | 3.11487            | 3.11487                      | T up vs N                              | 10.564  | 12.091    | 18.3123    | 1         |
| cg14628108                                                                              | CKAP4                                                                          | 0.00073892        | 0.000738921          | 0.304368           | -3.2855                      | T down vs N                            | 17.299  | 13.2527   | 12.2574    | 1         |
| cg14630032                                                                              | CP                                                                             | 0.00033423        | 0.000334232          | 0.318332           | -3.14138                     | T down vs N                            | 20.618  | 12.272    | 9.52343    | 1         |
| cg14630237                                                                              | CYP51A1;CYP51A1                                                                | 0.00452658        | 0.00452658           | 0.277291           | -3.60632                     | T down vs N                            | 10.885  | 15.41     | 22.6515    | 1         |
| cg14631333                                                                              | KIAA0415                                                                       | 4.01E-06          | 4.01E-06             | 0.285882           | -3.49795                     | T down vs N                            | 46.72   | 14.6856   | 5.02929    | 1         |
| SDCCAG3;SDCCAG3;PMPCA;SDCCAG3                                                           |                                                                                |                   |                      |                    |                              |                                        |         |           |            |           |
| cg14631541                                                                              | MS4A7;MS4A7;MS4A7;MS4A7                                                        | 9.70E-08          | 9.70E-08             | 0.265625           | -3.76471                     | T down vs N                            | 83.221  | 16.4601   | 3.16459    | 1         |
| cg14632030                                                                              | TTC12                                                                          | 0.00234657        | 0.00234657           | 0.205511           | -4.86591                     | T down vs N                            | 13.036  | 23.4485   | 28.7806    | 1         |
| cg14632485                                                                              | FANCC                                                                          | 2.58E-06          | 2.58E-06             | 0.10263            | -9.74378                     | T down vs N                            | 50.216  | 48.5452   | 15.4678    | 1         |
| cg14633742                                                                              | CHMP4C                                                                         | 3.31E-05          | 3.31E-05             | 0.271495           | -3.68331                     | T down vs N                            | 32.439  | 15.9218   | 7.85318    | 1         |
| cg14638840                                                                              | NACA2                                                                          | 0.0003198         | 0.000319798          | 3.17394            | 3.17394                      | T up vs N                              | 20.813  | 12.4941   | 9.60505    | 1         |
| cg14641092                                                                              | PRRT1                                                                          | 1.93E-05          | 1.93E-05             | 0.165282           | -6.05026                     | T down vs N                            | 35.751  | 30.3498   | 13.5828    | 1         |
| cg14644001                                                                              | PRRT1                                                                          | 1.98E-08          | 1.98E-08             | 22.975             | 22.975                       | T up vs N                              | 104.82  | 92.0178   | 14.0453    | 1         |

| Probeset ID | UCSC_REFGENE_NAME                                                | p-value<br>(Type) | p-value (T vs.<br>N) | Ratio (T<br>vs. N) | Fold-<br>Change (T<br>vs. N) | Fold-Change (T vs.<br>N) (Description) | F(Type) | SS (Type) | SS (Error) | F (Error) |
|-------------|------------------------------------------------------------------|-------------------|----------------------|--------------------|------------------------------|----------------------------------------|---------|-----------|------------|-----------|
| cg14644941  | LOC100287834                                                     | 0.00044996        | 0.000449964          | 0.179701           | -5.56479                     | T down vs N                            | 19.334  | 27.5949   | 22.836     | 1         |
| cg14646111  | SEC23B;SEC23B;SEC23B<br>ADAMTS13;ADAMTS13;ADAMTS13;A             | 8.91E-05          | 8.91E-05             | 0.125374           | -7.97613                     | T down vs N                            | 26.952  | 40.3837   | 23.9736    | 1         |
| cg14647253  | DAMTS13                                                          | 2.94E-05          | 2.94E-05             | 0.229563           | -4.35611                     | T down vs N                            | 33.159  | 20.2828   | 9.78705    | 1         |
| cg14651254  | ATAD3A;ATAD3A;ATAD3A                                             | 2.11E-05          | 2.11E-05             | 0.147614           | -6.77445                     | T down vs N                            | 35.171  | 34.2818   | 15.5953    | 1         |
| cg14651305  | HLA-B                                                            | 8.34E-05          | 8.34E-05             | 4.11769            | 4.11769                      | T up vs N                              | 27.301  | 18.7609   | 10.9952    | 1         |
| cg14651518  | SEMA3B;SEMA3B                                                    | 2.66E-05          | 2.66E-05             | 4.50198            | 4.50198                      | T up vs N                              | 33.749  | 21.201    | 10.0511    | 1         |
| cg14652403  | IDUA                                                             | 0.00088847        | 0.000888468          | 0.286357           | -3.49214                     | T down vs N                            | 16.576  | 14.6467   | 14.1382    | 1         |
| cg14652638  | SERPINB1                                                         | 5.97E-05          | 5.97E-05             | 9.99032            | 9.99032                      | T up vs N                              | 29.088  | 49.6167   | 27.2921    | 1         |
| cg14654468  | SLC16A3;SLC16A3;SLC16A3                                          | 0.00023442        | 0.000234424          | 4.61327            | 4.61327                      | T up vs N                              | 22.214  | 21.8948   | 15.7699    | 1         |
| cg14654533  | NUDT16P;NUDT16P                                                  | 2.76E-05          | 2.76E-05             | 9.33675            | 9.33675                      | T up vs N                              | 33.533  | 46.7425   | 22.3028    | 1         |
| cg14654811  | OR10X1                                                           | 0.00138568        | 0.00138568           | 0.27869            | -3.58821                     | T down vs N                            | 15.791  | 13.3782   | 11.8612    | 1         |
| cg14658964  | C1orf228                                                         | 0.00164699        | 0.00164699           | 0.33317            | -3.00147                     | T down vs N                            | 14.274  | 11.3146   | 12.6824    | 1         |
| cg14659129  | C2orf76                                                          | 0.00058077        | 0.000580773          | 0.252411           | -3.96179                     | T down vs N                            | 18.271  | 17.7516   | 15.5451    | 1         |
| cg14659662  | GLIS1<br>ZBTB20;ZBTB20;ZBTB20;ZBTB20;ZBTB                        | 6.53E-05          | 6.53E-05             | 9.0561             | 9.0561                       | T up vs N                              | 28.603  | 45.474    | 25.4375    | 1         |
| cg14659930  | 20;ZBTB20                                                        | 0.00193323        | 0.00193323           | 0.285526           | -3.50231                     | T down vs N                            | 13.707  | 14.7149   | 17.1771    | 1         |
| cg14662886  | SNORA6;RPSA;RPSA                                                 | 0.00060836        | 0.000608362          | 0.309141           | -3.23477                     | T down vs N                            | 18.081  | 12.9082   | 11.4223    | 1         |
| cg14663965  | NR2E1                                                            | 7.38E-06          | 7.38E-06             | 0.098126           | -10.191                      | T down vs N                            | 42.191  | 50.4778   | 19.1427    | 1         |
| cg14664412  | CSTA;CSTA                                                        | 0.00094309        | 0.000943087          | 0.333021           | -3.00281                     | T down vs N                            | 16.345  | 11.3238   | 11.0848    | 1         |
| cg14666564  | HOXD3                                                            | 0.00700033        | 0.00700033           | 3.66588            | 3.66588                      | T up vs N                              | 9.5587  | 15.8061   | 26.4574    | 1         |
| cg14666908  | STK19;DOM3Z                                                      | 0.00031724        | 0.000317236          | 0.325505           | -3.07215                     | T down vs N                            | 20.848  | 11.7989   | 9.05506    | 1         |
| cg14669515  | SPSB1<br>LOC100302652;ERLEC1;ASB3;ASB3;ER                        | 0.0002355         | 0.000235499          | 0.251067           | -3.983                       | T down vs N                            | 22.193  | 17.8896   | 12.8973    | 1         |
| cg14669921  | LEC1;ERLEC1                                                      | 0.00024591        | 0.00024591           | 0.156165           | -6.40349                     | T down vs N                            | 21.995  | 32.2933   | 23.4917    | 1         |
| cg14670629  | SVIL;SVIL                                                        | 9.04E-07          | 9.04E-07             | 0.195917           | -5.10421                     | T down vs N                            | 59.328  | 24.887    | 6.71166    | 1         |
| cg14671222  | KRBA1                                                            | 0.00063074        | 0.00063074           | 3.14191            | 3.14191                      | T up vs N                              | 17.935  | 12.2756   | 10.9515    | 1         |
| cg14673618  | SIX3                                                             | 0.00021236        | 0.000212361          | 0.232982           | -4.29218                     | T down vs N                            | 22.672  | 19.8773   | 14.0277    | 1         |
| cg14675361  | LMO7;LMO7                                                        | 4.70E-06          | 4.70E-06             | 0.189816           | -5.26825                     | T down vs N                            | 45.5    | 25.8623   | 9.0945     | 1         |
| cg14675871  | CSF2                                                             | 1.10E-05          | 1.10E-05             | 0.328868           | -3.04073                     | T down vs N                            | 39.392  | 11.5837   | 4.70505    | 1         |
| cg14676407  | CPXM2;CPXM2                                                      | 3.67E-06          | 3.67E-06             | 21.917             | 21.917                       | T up vs N                              | 47.391  | 89.2706   | 30.1394    | 1         |
| cg14676529  | PCDHA6;PCDHA2;PCDHA1;PCDHA9;PC<br>DHA7;PCDHA1;PCDHA6;PCDHA10;PCD | 7.89E-05          | 7.89E-05             | 7.41169            | 7.41169                      | T up vs N                              | 27.593  | 37.5793   | 21.7904    | 1         |
| cg14676825  | HAS;PCDHA3;PCDHA4;PCDHA10;P                                      | 3.53E-07          | 3.53E-07             | 16.5271            | 16.5271                      | T up vs N                              | 68.585  | 73.6933   | 17.1918    | 1         |
| cg14678774  | PROCA1                                                           | 0.00048363        | 0.000483628          | 3.71936            | 3.71936                      | T up vs N                              | 19.03   | 16.1606   | 13.5873    | 1         |
| cg14684434  | SNX18;SNX18                                                      | 0.00015249        | 0.000152491          | 0.328214           | -3.04679                     | T down vs N                            | 24.249  | 11.6252   | 7.67054    | 1         |
| cg14686949  | GABRE;MIR452                                                     | 0.00413487        | 0.00413487           | 0.309444           | -3.2316                      | T down vs N                            | 11.17   | 12.8867   | 18.4587    | 1         |
| cg14687118  | LHPP;LHPP                                                        | 0.0003437         | 0.000343696          | 0.107545           | -9.29841                     | T down vs N                            | 20.495  | 46.5704   | 36.3562    | 1         |
| cg14688962  | FAM20A                                                           | 0.00058485        | 0.000584847          | 6.24567            | 6.24567                      | T up vs N                              | 18.242  | 31.4311   | 27.5675    | 1         |
| cg14689537  | HHEX                                                             | 6.37E-06          | 6.37E-06             | 0.150833           | -6.62983                     | T down vs N                            | 43.255  | 33.5128   | 12.3963    | 1         |
| cg14692895  | EIF3M                                                            | 0.00037662        | 0.000376615          | 0.263522           | -3.79475                     | T down vs N                            | 20.097  | 16.6581   | 13.2624    | 1         |
| cg14693391  | FRZB                                                             | 0.00220954        | 0.00220954           | 6.06952            | 6.06952                      | T up vs N                              | 13.242  | 30.457    | 36.8       | 1         |
| cg14694712  | PSG5;PSG5                                                        | 1.25E-05          | 1.25E-05             | 0.245365           | -4.07555                     | T down vs N                            | 38.576  | 18.4892   | 7.66872    | 1         |
| cg14695751  | CDK15                                                            | 1.05E-05          | 1.05E-05             | 0.171              | -5.84795                     | T down vs N                            | 39.753  | 29.2138   | 11.758     | 1         |
| cg14696820  | LCE1A                                                            | 0.00040017        | 0.000400173          | 0.277094           | -3.60888                     | T down vs N                            | 19.835  | 15.4271   | 12.4445    | 1         |
| cg14696870  | FCER1A                                                           | 0.0005411         | 0.0005411            | 0.181476           | -5.51037                     | T down vs N                            | 18.562  | 27.2798   | 23.5141    | 1         |
| cg14697642  | PKD2L2                                                           | 0.00536979        | 0.00536979           | 4.82487            | 4.82487                      | T up vs N                              | 10.356  | 23.1981   | 35.841     | 1         |
| cg14701867  | ZNF365;ZNF365                                                    | 4.18E-05          | 4.18E-05             | 0.296258           | -3.37544                     | T down vs N                            | 31.091  | 13.8613   | 7.13321    | 1         |
| cg14702231  | BLK                                                              | 8.47E-05          | 8.47E-05             | 0.305584           | -3.27243                     | T down vs N                            | 27.22   | 13.164    | 7.73778    | 1         |
| cg14702787  | CXCR1                                                            | 2.05E-05          | 2.05E-05             | 0.198661           | -5.0337                      | T down vs N                            | 35.372  | 24.464    | 11.0659    | 1         |
| cg14703002  | HIST1H1A                                                         | 0.00063622        | 0.000636223          | 15.9771            | 15.9771                      | T up vs N                              | 17.9    | 71.9255   | 64.2927    | 1         |
| cg14704078  | CAB39L;CAB39L                                                    | 0.00056421        | 0.000564209          | 0.299503           | -3.33886                     | T down vs N                            | 18.39   | 13.6141   | 11.8449    | 1         |
| cg14707053  | TAF8                                                             | 0.00443678        | 0.00443678           | 0.283094           | -3.53239                     | T down vs N                            | 10.948  | 14.9164   | 21.8       | 1         |
| cg14708905  | TRIM40                                                           | 0.00040085        | 0.000400845          | 0.307647           | -3.25048                     | T down vs N                            | 19.828  | 13.015    | 10.5026    | 1         |
| cg14709055  | C5orf48                                                          | 0.00013231        | 0.00013231           | 0.270735           | -3.69365                     | T down vs N                            | 24.946  | 15.9903   | 10.2561    | 1         |
| cg14712983  | TNFRSF8;TNFRSF8                                                  | 6.88E-05          | 6.88E-05             | 0.174175           | -5.74136                     | T down vs N                            | 28.321  | 28.6084   | 16.1626    | 1         |
| cg14714537  | SLC26A7;SLC26A7                                                  | 0.00139912        | 0.00139912           | 0.27697            | -3.6105                      | T down vs N                            | 14.865  | 15.4379   | 16.6171    | 1         |
| cg14714797  | AHRR                                                             | 0.0002249         | 0.000224897          | 9.29115            | 9.29115                      | T up vs N                              | 22.406  | 46.5378   | 33.2327    | 1         |
| cg14716968  | DLG2;DLG2                                                        | 0.00483012        | 0.00483012           | 0.329751           | -3.03259                     | T down vs N                            | 10.683  | 11.528    | 17.2662    | 1         |
| cg14717122  | CYP2C8                                                           | 0.00153603        | 0.00153603           | 0.295656           | -3.38231                     | T down vs N                            | 14.525  | 13.9077   | 15.3198    | 1         |
| cg14717666  | SYNPO2;SYNPO2;SYNPO2                                             | 7.82E-05          | 7.82E-05             | 0.29824            | -3.353                       | T down vs N                            | 27.639  | 13.7097   | 7.9364     | 1         |
| cg14721213  | FMO2                                                             | 8.06E-05          | 8.06E-05             | 0.252623           | -3.95846                     | T down vs N                            | 27.478  | 17.7299   | 10.324     | 1         |
| cg14727409  | DEFB121                                                          | 3.88E-06          | 3.88E-06             | 0.182176           | -5.48919                     | T down vs N                            | 46.969  | 27.1568   | 9.25092    | 1         |
| cg14728380  | SECTM1                                                           | 0.00031845        | 0.000318446          | 0.228893           | -4.36885                     | T down vs N                            | 20.831  | 20.3635   | 15.6406    | 1         |
| cg14728856  | UBA1;UBA1                                                        | 5.31E-06          | 5.31E-06             | 0.261341           | -3.82642                     | T down vs N                            | 44.594  | 16.8664   | 6.05158    | 1         |
| cg14729148  | CUGBP2;CUGBP2;CUGBP2;CUGBP2                                      | 3.88E-05          | 3.88E-05             | 0.260216           | -3.84296                     | T down vs N                            | 31.518  | 16.9749   | 8.61728    | 1         |
| cg14729184  | ASB5                                                             | 0.00530664        | 0.00530664           | 0.314634           | -3.1783                      | T down vs N                            | 10.392  | 12.5238   | 19.2818    | 1         |
| cg14729980  | SIGLEC15                                                         | 2.15E-05          | 2.15E-05             | 0.246299           | -4.06011                     | T down vs N                            | 35.076  | 18.3894   | 8.38842    | 1         |
| cg14731407  | CCDC159                                                          | 0.00085077        | 0.000850773          | 0.283741           | -3.52434                     | T down vs N                            | 16.744  | 14.8625   | 14.202     | 1         |

| Probeset ID | UCSC_REFGENE_NAME                           | p-value<br>(Type) | p-value (T vs.<br>N) | Ratio (T<br>vs. N) | Fold-<br>Change (T<br>vs. N) | Fold-Change (T vs.<br>N) (Description) | F(Type) | SS (Type) | SS (Error) | F (Error) |
|-------------|---------------------------------------------|-------------------|----------------------|--------------------|------------------------------|----------------------------------------|---------|-----------|------------|-----------|
| cg14731462  | PTPRE                                       | 0.00010194        | 0.00010194           | 0.188874           | -5.29454                     | T down vs N                            | 26.258  | 26.0174   | 15.8531    | 1         |
| cg14732907  | STXBP2;STXBP2                               | 0.00302916        | 0.00302916           | 0.305423           | -3.27415                     | T down vs N                            | 12.178  | 13.1757   | 17.3115    | 1         |
| cg14739664  | SLC25A2;SLC25A2                             | 0.00028065        | 0.000280651          | 3.11312            | 3.11312                      | T up vs N                              | 21.395  | 12.079    | 9.03306    | 1         |
| cg14741228  | FAM60A;FAM60A;FLJ13224;FAM60A               | 4.78E-05          | 4.78E-05             | 0.126996           | -7.87428                     | T down vs N                            | 30.331  | 39.8854   | 21.04      | 1         |
| cg14741691  | PLD3;PLD3;C19orf47                          | 0.00522105        | 0.00522105           | 0.332715           | -3.00558                     | T down vs N                            | 10.442  | 11.3427   | 17.3799    | 1         |
| cg14742186  | KCNK17;KCNK17                               | 1.17E-06          | 1.17E-06             | 0.298963           | -3.34489                     | T down vs N                            | 56.968  | 13.6549   | 3.83511    | 1         |
| cg14743346  | DERL1;DERL1                                 | 0.00076701        | 0.000767011          | 0.183613           | -5.44623                     | T down vs N                            | 17.151  | 26.9068   | 25.1007    | 1         |
| cg14744898  | TMEM171;TMEM171                             | 0.0008517         | 0.000851695          | 4.53854            | 4.53854                      | T up vs N                              | 16.74   | 21.4295   | 20.4823    | 1         |
| cg14746717  | CD163L1                                     | 1.25E-05          | 1.25E-05             | 0.134255           | -7.44854                     | T down vs N                            | 38.535  | 37.7656   | 15.6804    | 1         |
| cg14746813  | CLP1;CLP1                                   | 3.06E-05          | 3.06E-05             | 0.217229           | -4.60344                     | T down vs N                            | 32.905  | 21.8337   | 10.6166    | 1         |
| cg14748380  | FAM163A                                     | 0.00140904        | 0.00140904           | 5.97145            | 5.97145                      | T up vs N                              | 14.839  | 29.9093   | 32.2499    | 1         |
| cg14750746  | MS4A6E                                      | 5.55E-08          | 5.55E-08             | 0.070386           | -14.2073                     | T down vs N                            | 90.321  | 65.9605   | 11.6846    | 1         |
| cg14752361  | MACC1                                       | 3.11E-06          | 3.11E-06             | 0.303111           | -3.29912                     | T down vs N                            | 48.713  | 13.345    | 4.38326    | 1         |
| cg14753070  | IL27RA                                      | 6.71E-05          | 6.71E-05             | 0.15191            | -6.58286                     | T down vs N                            | 28.459  | 33.2613   | 18.7002    | 1         |
| cg14753074  | DNAJC22                                     | 0.00384742        | 0.00384742           | 3.44831            | 3.44831                      | T up vs N                              | 11.4    | 14.3523   | 20.1441    | 1         |
| cg14753321  | RGS14;RGS14                                 | 2.63E-06          | 2.63E-06             | 0.146167           | -6.8415                      | T down vs N                            | 50.037  | 34.6356   | 11.0752    | 1         |
| cg14753355  | F2RL3                                       | 1.56E-07          | 1.56E-07             | 0.102024           | -9.80161                     | T down vs N                            | 77.582  | 48.7979   | 10.0638    | 1         |
| cg14755414  | ASAP2;ASAP2                                 | 0.0001626         | 0.000162604          | 0.195278           | -5.1209                      | T down vs N                            | 23.938  | 24.9867   | 16.7009    | 1         |
| cg14755831  | CLTCL1;CLTCL1                               | 7.45E-06          | 7.45E-06             | 0.228192           | -4.38228                     | T down vs N                            | 42.127  | 20.4483   | 7.76636    | 1         |
| cg14757492  | COPE;DDX49;COPE;COPE                        | 0.0024315         | 0.0024315            | 0.301355           | -3.31835                     | T down vs N                            | 12.915  | 13.4753   | 16.6948    | 1         |
| cg14758105  | OR1M1                                       | 2.46E-06          | 2.46E-06             | 0.274135           | -3.64783                     | T down vs N                            | 50.584  | 15.6863   | 4.96163    | 1         |
| cg14758218  | NEAT1                                       | 0.00237237        | 0.00237237           | 3.90696            | 3.90696                      | T up vs N                              | 12.998  | 17.3941   | 21.4107    | 1         |
| cg14761454  | ATM;NPAT                                    | 4.32E-06          | 4.32E-06             | 0.212198           | -4.71257                     | T down vs N                            | 46.137  | 22.509    | 7.80589    | 1         |
| cg14762784  | ATF6B;ATF6B;FKBP1                           | 0.00048862        | 0.000488622          | 0.276649           | -3.61468                     | T down vs N                            | 18.987  | 15.4657   | 13.0327    | 1         |
| cg14765818  | BLCAP;BLCAP;BLCAP;BLCAP;NNAT;NN             | 4.98E-05          | 4.98E-05             | 4.03889            | 4.03889                      | T up vs N                              | 30.091  | 18.2522   | 9.70491    | 1         |
| cg14765834  | YBX2                                        | 4.94E-05          | 4.94E-05             | 0.261629           | -3.8222                      | T down vs N                            | 30.14   | 16.8386   | 8.93892    | 1         |
| cg14765933  | SLC6A3                                      | 3.46E-05          | 3.46E-05             | 0.131622           | -7.59752                     | T down vs N                            | 32.186  | 38.5142   | 19.1457    | 1         |
| cg14768087  | TPRG1                                       | 3.56E-06          | 3.56E-06             | 0.213279           | -4.6887                      | T down vs N                            | 47.648  | 22.3618   | 7.50896    | 1         |
| cg14768256  | ZNF502;ZNF502;ZNF502;ZNF502                 | 9.07E-05          | 9.07E-05             | 0.294466           | -3.39598                     | T down vs N                            | 26.861  | 13.9999   | 8.33916    | 1         |
| cg14769373  | UNC5CL                                      | 0.00031132        | 0.000311318          | 0.297919           | -3.35662                     | T down vs N                            | 20.932  | 13.7342   | 10.4983    | 1         |
| cg14771313  | FOXP1                                       | 0.00024454        | 0.000244538          | 0.265613           | -3.76487                     | T down vs N                            | 22.02   | 16.4612   | 11.9607    | 1         |
| cg14772439  | HLA-A                                       | 0.0017095         | 0.0017095            | 0.221963           | -4.50525                     | T down vs N                            | 14.141  | 21.2215   | 24.0108    | 1         |
| cg14773822  | SEPT9;SEPT9;SEPT9;SEPT9;SEPT9;SEPT9         | 0.00149523        | 0.00149523           | 0.170358           | -5.86999                     | T down vs N                            | 14.623  | 29.3384   | 32.1019    | 1         |
| cg14774755  | PRDM14                                      | 2.92E-05          | 2.92E-05             | 0.250376           | -3.99399                     | T down vs N                            | 33.195  | 17.961    | 8.65721    | 1         |
| cg14778691  | TSNARE1                                     | 0.00396659        | 0.00396659           | 0.321187           | -3.11345                     | T down vs N                            | 11.302  | 12.0813   | 17.1028    | 1         |
| cg14779271  | COL25A1;COL25A1                             | 0.00011365        | 0.000113649          | 0.300679           | -3.32581                     | T down vs N                            | 25.706  | 13.5258   | 8.41885    | 1         |
| cg14781605  | ALPL                                        | 1.40E-05          | 1.40E-05             | 0.247986           | -4.03248                     | T down vs N                            | 37.812  | 18.2106   | 7.70576    | 1         |
| cg14786652  | TTL10                                       | 0.00025939        | 0.000259391          | 7.29773            | 7.29773                      | T up vs N                              | 21.751  | 37.0002   | 27.2168    | 1         |
| cg14787581  | NTNG1;NTNG1;NTNG1                           | 0.00033545        | 0.000335447          | 0.286907           | -3.48545                     | T down vs N                            | 20.602  | 14.6018   | 11.3402    | 1         |
| cg14789828  | AHNAK                                       | 3.39E-06          | 3.39E-06             | 0.211351           | -4.73146                     | T down vs N                            | 48.024  | 22.6253   | 7.53807    | 1         |
| cg14791054  | ALDH1A3                                     | 0.0001124         | 0.0001124            | 0.162591           | -6.15039                     | T down vs N                            | 25.762  | 30.9058   | 19.195     | 1         |
| cg14791530  | CTBS                                        | 1.19E-05          | 1.19E-05             | 0.244402           | -4.09162                     | T down vs N                            | 38.87   | 18.5929   | 7.65335    | 1         |
| cg14792155  | PLA2G4E                                     | 0.00169333        | 0.00169333           | 0.324652           | -3.08022                     | T down vs N                            | 14.175  | 11.8541   | 13.3801    | 1         |
| cg14792959  | CHST8;CHST8;CHST8                           | 7.27E-05          | 7.27E-05             | 0.178028           | -5.61711                     | T down vs N                            | 28.028  | 27.8966   | 15.9252    | 1         |
| cg14793764  | TTL10                                       | 5.73E-05          | 5.73E-05             | 0.225495           | -4.43468                     | T down vs N                            | 29.321  | 20.7786   | 11.3385    | 1         |
| cg14793844  | AFF3;AFF3                                   | 0.00088705        | 0.000887048          | 0.273493           | -3.65639                     | T down vs N                            | 16.582  | 15.7431   | 15.1909    | 1         |
| cg14794936  | LDB3;LDB3;LDB3                              | 0.00414692        | 0.00414692           | 0.171743           | -5.82264                     | T down vs N                            | 11.161  | 29.0705   | 41.6745    | 1         |
| cg14801038  | TCF21                                       | 0.00214239        | 0.00214239           | 3.64986            | 3.64986                      | T up vs N                              | 13.349  | 15.6997   | 18.8179    | 1         |
| cg14802312  | ARHGAP9;ARHGAP9                             | 3.50E-06          | 3.50E-06             | 0.145599           | -6.86818                     | T down vs N                            | 47.767  | 34.776    | 11.6485    | 1         |
| cg14804000  | RNF135;RNF135                               | 0.00171968        | 0.00171968           | 3.63607            | 3.63607                      | T up vs N                              | 14.12   | 15.6081   | 17.686     | 1         |
| cg14806431  | GALNT7                                      | 0.00121511        | 0.00121511           | 0.296707           | -3.37033                     | T down vs N                            | 15.385  | 13.8268   | 14.3794    | 1         |
| cg14812313  | TAP2;TAP2                                   | 0.00081428        | 0.000814282          | 0.267425           | -3.73937                     | T down vs N                            | 16.916  | 16.2928   | 15.4108    | 1         |
| cg14814815  | CTPS2;CTPS2                                 | 0.0001424         | 0.000142395          | 0.314547           | -3.17917                     | T down vs N                            | 24.584  | 12.5298   | 8.15486    | 1         |
| cg14819504  | LY75                                        | 6.04E-05          | 6.04E-05             | 33.1993            | 33.1993                      | T up vs N                              | 29.031  | 114.901   | 63.3273    | 1         |
| cg14819820  | OR4D2                                       | 0.00237072        | 0.00237072           | 0.291963           | -3.42509                     | T down vs N                            | 13.001  | 14.1961   | 17.4711    | 1         |
| cg14821045  | PSG8;PSG8;PSG8                              | 1.00E-05          | 1.00E-05             | 0.255529           | -3.91344                     | T down vs N                            | 40.037  | 17.4364   | 6.9681     | 1         |
| cg14821257  | GABPB1;GABPB1;FLJ10038;GABPB1;GABPB1;GABPB1 | 0.00026519        | 0.000265185          | 0.270628           | -3.69511                     | T down vs N                            | 21.651  | 16        | 11.8239    | 1         |
| cg14825340  | ADRA1A;ADRA1A;ADRA1A;ADRA1A                 | 2.15E-05          | 2.15E-05             | 0.145217           | -6.88627                     | T down vs N                            | 35.055  | 34.871    | 15.9161    | 1         |
| cg14826683  | SPRR2D                                      | 4.83E-07          | 4.83E-07             | 0.083546           | -11.9694                     | T down vs N                            | 65.385  | 57.7151   | 14.1232    | 1         |
| cg14826797  | TARS                                        | 0.0005642         | 0.0005642            | 0.297786           | -3.35812                     | T down vs N                            | 18.39   | 13.7443   | 11.9581    | 1         |
| cg14828248  | FLJ30058                                    | 0.00329595        | 0.00329595           | 3.4661             | 3.4661                       | T up vs N                              | 11.9    | 14.4719   | 19.4577    | 1         |
| cg14829516  | THRA;NR1D1                                  | 3.44E-05          | 3.44E-05             | 4.20256            | 4.20256                      | T up vs N                              | 32.215  | 19.3057   | 9.5884     | 1         |
| cg14830002  | OR2B11                                      | 2.38E-05          | 2.38E-05             | 0.273283           | -3.65921                     | T down vs N                            | 34.433  | 15.7619   | 7.32401    | 1         |
| cg14833286  | MYH1                                        | 0.00293797        | 0.00293797           | 0.320483           | -3.12029                     | T down vs N                            | 12.279  | 12.128    | 15.8036    | 1         |
| cg14833337  | FCRL5                                       | 2.23E-07          | 2.23E-07             | 0.262122           | -3.81502                     | T down vs N                            | 73.509  | 16.7914   | 3.65485    | 1         |
| cg14833935  | RDBP;SKIV2L                                 | 0.00032716        | 0.000327164          | 0.231585           | -4.31807                     | T down vs N                            | 21.434  | 18.8628   | 13.2007    | 1         |
| cg14834078  | LOC100288797                                | 0.00066135        | 0.000661349          | 0.311135           | -3.21404                     | T down vs N                            | 17.743  | 12.7672   | 11.513     | 1         |

| Probeset ID | UCSC_REFGENE_NAME             | p-value<br>(Type) | p-value (T vs.<br>N) | Ratio (T<br>vs. N) | Fold-<br>Change (T<br>vs. N) | Fold-Change (T vs.<br>N) (Description) | F(Type) | SS (Type) | SS (Error) | F (Error) |
|-------------|-------------------------------|-------------------|----------------------|--------------------|------------------------------|----------------------------------------|---------|-----------|------------|-----------|
| cg14834675  | BEST3;BEST3                   | 0.00035037        | 0.000350373          | 0.218296           | -4.58094                     | T down vs N                            | 20.411  | 21.6939   | 17.0057    | 1         |
| cg14836522  | SDC3                          | 0.00062513        | 0.000625125          | 0.330221           | -3.02827                     | T down vs N                            | 17.971  | 11.4984   | 10.2373    | 1         |
| cg14836643  | ZNF670                        | 0.00122621        | 0.00122621           | 0.31476            | -3.17702                     | T down vs N                            | 15.351  | 12.5151   | 13.044     | 1         |
| cg14838115  | C7orf71                       | 0.00012879        | 0.000128789          | 0.327486           | -3.05356                     | T down vs N                            | 25.08   | 11.6716   | 7.44617    | 1         |
| cg14839256  | DEFB104B;DEFB104A             | 0.00016137        | 0.000161365          | 0.301576           | -3.31592                     | T down vs N                            | 23.975  | 13.4588   | 8.98188    | 1         |
| cg14840351  | ALK                           | 2.02E-05          | 2.02E-05             | 0.17575            | -5.68991                     | T down vs N                            | 35.466  | 28.3145   | 12.7736    | 1         |
| cg14841828  | BCL11B;BCL11B                 | 1.17E-05          | 1.17E-05             | 0.092238           | -10.8415                     | T down vs N                            | 38.991  | 53.2045   | 21.8328    | 1         |
| cg14843337  | SYN2;TIMP4;SYN2               | 5.49E-06          | 5.49E-06             | 0.289167           | -3.45821                     | T down vs N                            | 44.343  | 14.4189   | 5.20269    | 1         |
| cg14844466  | CNIH                          | 0.00144086        | 0.00144086           | 0.27533            | -3.63201                     | T down vs N                            | 14.757  | 15.5811   | 16.8932    | 1         |
| cg14845282  | NUDT16P;NUDT16P               | 7.15E-05          | 7.15E-05             | 4.12725            | 4.12725                      | T up vs N                              | 28.114  | 18.8225   | 10.712     | 1         |
| cg14845689  | EMX2;EMX2                     | 0.00011684        | 0.000116837          | 0.088007           | -11.3628                     | T down vs N                            | 25.566  | 55.3219   | 34.6217    | 1         |
| cg14845909  | ZDHHC11                       | 0.00305604        | 0.00305604           | 0.326426           | -3.06348                     | T down vs N                            | 12.148  | 11.7395   | 15.4616    | 1         |
| cg14846380  | SCARB1;SCARB1                 | 0.004717          | 0.004717             | 3.73063            | 3.73063                      | T up vs N                              | 10.756  | 16.235    | 24.1498    | 1         |
| cg14847095  | HIST3H3                       | 4.01E-05          | 4.01E-05             | 0.173068           | -5.77806                     | T down vs N                            | 31.334  | 28.8174   | 14.7151    | 1         |
| cg14847626  | NCOR2;NCOR2                   | 0.00035842        | 0.000358415          | 4.31883            | 4.31883                      | T up vs N                              | 20.312  | 20.0466   | 15.791     | 1         |
| cg14849468  | ALDH6A1                       | 0.00352587        | 0.00352587           | 0.328456           | -3.04455                     | T down vs N                            | 11.681  | 11.6099   | 15.9029    | 1         |
| cg14855334  | CYP11A1;CYP11A1               | 0.00720563        | 0.00720563           | 7.68527            | 7.68527                      | T up vs N                              | 9.4735  | 38.9517   | 65.7863    | 1         |
| cg14855874  | BANK1;BANK1                   | 0.00630964        | 0.00630964           | 3.95297            | 3.95297                      | T up vs N                              | 9.8676  | 17.6942   | 28.6905    | 1         |
| cg14856606  | C4BPA                         | 0.00040014        | 0.000400141          | 0.171131           | -5.84346                     | T down vs N                            | 19.835  | 29.1884   | 23.5449    | 1         |
| cg14857380  | PHLDB2;PHLDB2;PHLDB2;PHLDB2   | 0.00303758        | 0.00303758           | 0.387555           | 3.87555                      | T up vs N                              | 12.168  | 17.1886   | 22.601     | 1         |
| cg14862395  | CDH22                         | 0.00011773        | 0.000117729          | 4.5592             | 4.5592                       | T up vs N                              | 25.528  | 21.5584   | 13.512     | 1         |
| cg14862722  | CNTN4                         | 6.36E-05          | 6.36E-05             | 0.237439           | -4.2116                      | T down vs N                            | 28.745  | 19.3635   | 10.7781    | 1         |
| cg14864542  | SART3                         | 0.00031171        | 0.00031171           | 0.184731           | -5.41328                     | T down vs N                            | 20.926  | 26.7145   | 20.4257    | 1         |
| cg14870156  | HLA-DPB1                      | 0.00483652        | 0.00483652           | 3.58306            | 3.58306                      | T up vs N                              | 10.678  | 15.2549   | 22.8572    | 1         |
| cg14875498  | TMED8                         | 0.00028729        | 0.000287287          | 0.242703           | -4.12026                     | T down vs N                            | 21.29   | 18.7775   | 14.1116    | 1         |
| cg14878128  | ABCB5                         | 2.38E-05          | 2.38E-05             | 0.189964           | -5.26416                     | T down vs N                            | 34.435  | 25.8381   | 12.0055    | 1         |
| cg14884445  | SEN2                          | 3.29E-05          | 3.29E-05             | 0.282365           | -3.54152                     | T down vs N                            | 32.484  | 14.9774   | 7.37714    | 1         |
| cg14886269  | TNFRSF18;TNFRSF18;TNFRSF18    | 2.99E-05          | 2.99E-05             | 4.57151            | 4.57151                      | T up vs N                              | 33.042  | 21.6351   | 10.4764    | 1         |
| cg14891022  | RAC2                          | 5.00E-05          | 5.00E-05             | 0.293023           | -3.4127                      | T down vs N                            | 30.074  | 14.1126   | 7.50828    | 1         |
| cg14892281  | TTC12                         | 0.00032806        | 0.000328057          | 5.0104             | 5.0104                       | T up vs N                              | 20.7    | 24.3237   | 18.801     | 1         |
| cg14894368  | NAPSA                         | 0.00029565        | 0.000295647          | 0.141961           | -7.04417                     | T down vs N                            | 21.162  | 35.6952   | 26.9885    | 1         |
| cg14895775  | AMZ1                          | 0.00027473        | 0.000274726          | 0.332233           | -3.00994                     | T down vs N                            | 21.491  | 11.3726   | 8.46679    | 1         |
| cg14896087  | FAM21C;FAM21C;FAM21C          | 2.29E-05          | 2.29E-05             | 0.30877            | -3.23866                     | T down vs N                            | 34.683  | 12.9347   | 5.96697    | 1         |
| cg14898243  | SRGN                          | 0.00028084        | 0.00028084           | 0.286037           | -3.49605                     | T down vs N                            | 21.392  | 14.6729   | 10.9744    | 1         |
| cg14898416  | PLA2R1;PLA2R1                 | 0.00281015        | 0.00281015           | 8.49922            | 8.49922                      | T up vs N                              | 12.427  | 42.8922   | 55.2256    | 1         |
| cg14902389  | MGAT4A                        | 1.34E-06          | 1.34E-06             | 0.18547            | -5.3917                      | T down vs N                            | 55.738  | 26.5883   | 7.6323     | 1         |
| cg14904662  | ANK1;ANK1;ANK1;ANK1;ANK1      | 7.28E-05          | 7.28E-05             | 7.85778            | 7.85778                      | T up vs N                              | 28.015  | 39.8043   | 22.7329    | 1         |
| cg14906103  | TMEM33                        | 7.66E-05          | 7.66E-05             | 0.180433           | -5.54222                     | T down vs N                            | 27.751  | 27.4644   | 15.835     | 1         |
| cg14909614  | TEAD3                         | 2.52E-05          | 2.52E-05             | 3.09851            | 3.09851                      | T up vs N                              | 34.074  | 11.9791   | 5.62492    | 1         |
| cg14912045  | RNFT2;RNFT2                   | 0.00663427        | 0.00663427           | 0.325696           | -3.07034                     | T down vs N                            | 9.7179  | 11.7865   | 19.4059    | 1         |
| cg14912380  | FLVCR1                        | 2.32E-05          | 2.32E-05             | 0.319786           | -3.12709                     | T down vs N                            | 34.603  | 12.1745   | 5.62936    | 1         |
| cg14913111  | HPDL;HPDL                     | 0.00098992        | 0.000989917          | 9.44612            | 9.44612                      | T up vs N                              | 16.159  | 47.2311   | 46.7665    | 1         |
| cg14915878  | MATN4;MATN4;RBPJL;MATN4       | 0.00053954        | 0.000539544          | 3.17916            | 3.17916                      | T up vs N                              | 18.574  | 12.5297   | 10.7932    | 1         |
| cg14916288  | CCL23;CCL23                   | 2.68E-05          | 2.68E-05             | 0.21509            | -4.64921                     | T down vs N                            | 33.716  | 22.1176   | 10.4961    | 1         |
| cg14918744  | TNFRSF10D                     | 2.87E-07          | 2.87E-07             | 0.20262            | -4.93534                     | T down vs N                            | 70.786  | 23.8702   | 5.39546    | 1         |
| cg14921939  | MATN4;MATN4;RBPJL;MATN4       | 0.00016037        | 0.000160372          | 3.89344            | 3.89344                      | T up vs N                              | 24.005  | 17.3056   | 11.5347    | 1         |
| cg14931238  | RAB41                         | 0.00134683        | 0.00134683           | 0.284651           | -3.51307                     | T down vs N                            | 15.004  | 14.787    | 15.7683    | 1         |
| cg14931811  | SLC14A2                       | 4.03E-05          | 4.03E-05             | 0.292543           | -3.4183                      | T down vs N                            | 31.293  | 14.1504   | 7.23507    | 1         |
| cg14932313  | CTSG                          | 0.0001844         | 0.000184403          | 0.208703           | -4.79149                     | T down vs N                            | 23.336  | 22.9939   | 15.7653    | 1         |
| cg14932408  | JAKMIP3                       | 0.00020361        | 0.000203612          | 0.16234            | -6.15992                     | T down vs N                            | 22.869  | 30.9585   | 21.6599    | 1         |
| cg14938313  | ANO1;ANO1                     | 1.82E-05          | 1.82E-05             | 0.241305           | -4.14413                     | T down vs N                            | 36.112  | 18.931    | 8.38761    | 1         |
| cg14939553  | LTF                           | 0.00152965        | 0.00152965           | 0.245282           | -4.07694                     | T down vs N                            | 14.54   | 18.4981   | 20.3552    | 1         |
| cg14940420  | IQCF2                         | 0.00010037        | 0.000100367          | 0.209563           | -4.77183                     | T down vs N                            | 26.338  | 22.8734   | 13.8952    | 1         |
| cg14940444  | CLEC5A                        | 0.00085693        | 0.000856933          | 0.213958           | -4.67382                     | T down vs N                            | 16.716  | 22.2698   | 21.3159    | 1         |
| cg14941226  | AFF3;AFF3                     | 8.46E-06          | 8.46E-06             | 0.158934           | -6.2919                      | T down vs N                            | 41.229  | 31.6847   | 12.2961    | 1         |
| cg14945086  | SMCHD1                        | 3.52E-05          | 3.52E-05             | 0.130953           | -7.63632                     | T down vs N                            | 32.083  | 38.708    | 19.304     | 1         |
| cg14948108  | MMP12                         | 1.29E-05          | 1.29E-05             | 0.172552           | -5.79536                     | T down vs N                            | 38.359  | 28.9157   | 12.0611    | 1         |
| cg14948230  | PQLC3                         | 6.23E-05          | 6.23E-05             | 0.279624           | -3.57623                     | T down vs N                            | 28.858  | 15.2094   | 8.43276    | 1         |
| cg14948804  | HTN3                          | 0.00064942        | 0.000649417          | 0.248517           | -4.02388                     | T down vs N                            | 17.817  | 18.1549   | 16.3039    | 1         |
| cg14948822  | MPV17                         | 0.00612864        | 0.00612864           | 0.276084           | -3.62209                     | T down vs N                            | 9.955   | 15.515    | 24.9364    | 1         |
| cg14950165  | NUP98;NUP98;NUP98;NUP98       | 0.00013924        | 0.000139241          | 0.252951           | -3.95334                     | T down vs N                            | 24.694  | 17.6966   | 11.4663    | 1         |
| cg14950193  | C7orf63;C7orf63               | 9.05E-05          | 9.05E-05             | 0.254484           | -3.92951                     | T down vs N                            | 26.875  | 17.5413   | 10.4432    | 1         |
| cg14950747  | ZFR2                          | 0.00535123        | 0.00535123           | 0.141455           | -7.06938                     | T down vs N                            | 10.367  | 35.826    | 55.2945    | 1         |
| cg14953379  | AGK                           | 0.00142287        | 0.00142287           | 0.26155            | -3.82335                     | T down vs N                            | 14.803  | 16.8462   | 18.2083    | 1         |
| cg14962032  | CASP8;CASP8;CASP8;CASP8;CASP8 | 2.67E-05          | 2.67E-05             | 0.176417           | -5.66837                     | T down vs N                            | 33.73   | 28.1911   | 13.3727    | 1         |
| cg14962327  | CRYBB2                        | 5.30E-05          | 5.30E-05             | 0.309359           | -3.23249                     | T down vs N                            | 29.744  | 12.8927   | 6.93527    | 1         |
| cg14962509  | TFAP2E                        | 9.56E-05          | 9.56E-05             | 3.53698            | 3.53698                      | T up vs N                              | 26.588  | 14.9471   | 8.99476    | 1         |
| cg14966325  | SPRR2A                        | 1.21E-06          | 1.21E-06             | 0.136439           | -7.32926                     | T down vs N                            | 56.688  | 37.1609   | 10.4884    | 1         |
| cg14972155  | ESM1;ESM1                     | 9.27E-05          | 9.27E-05             | 0.123181           | -8.11814                     | T down vs N                            | 26.748  | 41.073    | 24.5685    | 1         |
| cg14972889  | DCAF12L1                      | 0.00462992        | 0.00462992           | 0.309738           | -3.22853                     | T down vs N                            | 10.814  | 12.8658   | 19.0351    | 1         |
| cg14973240  | CROCC                         | 1.06E-05          | 1.06E-05             | 3.89572            | 3.89572                      | T up vs N                              | 39.689  | 17.3206   | 6.98257    | 1         |
| cg14973892  | C13orf18                      | 1.28E-06          | 1.28E-06             | 0.177961           | -5.6192                      | T down vs N                            | 56.167  | 27.9086   | 7.95017    | 1         |

| Probeset ID | UCSC_REFGENE_NAME               | p-value<br>(Type) | p-value (T vs.<br>N) | Ratio (T<br>vs. N) | Fold-<br>Change (T<br>vs. N) | Fold-Change (T vs.<br>N) (Description) | F(Type) | SS (Type) | SS (Error) | F (Error) |
|-------------|---------------------------------|-------------------|----------------------|--------------------|------------------------------|----------------------------------------|---------|-----------|------------|-----------|
| cg14974147  | FBXO40                          | 8.47E-06          | 8.47E-06             | 0.209742           | -4.76776                     | T down vs N                            | 41.218  | 22.8484   | 8.86938    | 1         |
| cg14979674  | HCN1                            | 2.12E-05          | 2.12E-05             | 0.186102           | -5.3734                      | T down vs N                            | 35.147  | 26.481    | 12.055     | 1         |
|             | GABPB1;GABPB1;GABPB1;GABPB1;GA  |                   |                      |                    |                              |                                        |         |           |            |           |
| cg14979946  | BPB1                            | 0.00152243        | 0.00152243           | 0.304293           | -3.28631                     | T down vs N                            | 14.557  | 13.2582   | 14.5721    | 1         |
| cg14980165  | SCGB1D1                         | 0.00341517        | 0.00341517           | 0.310675           | -3.2188                      | T down vs N                            | 11.784  | 12.7996   | 17.3785    | 1         |
| cg14981960  | GPR177;GPR177                   | 0.00202297        | 0.00202297           | 0.273683           | -3.65386                     | T down vs N                            | 13.548  | 15.7263   | 18.5727    | 1         |
| cg14982276  | TMPRSS2;TMPRSS2                 | 0.00380575        | 0.00380575           | 3.6945             | 3.6945                       | T up vs N                              | 11.69   | 15.055    | 19.3175    | 1         |
| cg14985891  | CASQ2                           | 0.00076819        | 0.000768187          | 0.309036           | -3.23587                     | T down vs N                            | 17.145  | 12.9157   | 12.053     | 1         |
| cg14988869  | GMCL1L                          | 1.86E-05          | 1.86E-05             | 0.20805            | -4.80653                     | T down vs N                            | 35.989  | 23.0859   | 10.2636    | 1         |
| cg14989033  | KCNK2;KCNK2                     | 1.27E-07          | 1.27E-07             | 0.106841           | -9.35973                     | T down vs N                            | 80.006  | 46.8454   | 9.36833    | 1         |
| cg14991358  | PRCC;PRCC                       | 0.00277784        | 0.00277784           | 3.41907            | 3.41907                      | T up vs N                              | 12.465  | 14.1555   | 18.1694    | 1         |
|             | TMEM176B;TMEM176B;TMEM176A;T    |                   |                      |                    |                              |                                        |         |           |            |           |
| cg14991769  | MEM176B;TMEM176B;TMEM176B       | 0.00011232        | 0.000112322          | 7.62053            | 7.62053                      | T up vs N                              | 25.765  | 38.6292   | 23.9886    | 1         |
| cg14993464  | AGAP1;AGAP1                     | 3.37E-05          | 3.37E-05             | 0.224285           | -4.4586                      | T down vs N                            | 32.345  | 20.929    | 10.3529    | 1         |
| cg14994242  | PTPRN2;PTPRN2;PTPRN2            | 1.65E-05          | 1.65E-05             | 0.267068           | -3.74437                     | T down vs N                            | 36.727  | 16.3259   | 7.11232    | 1         |
| cg14995160  | SLC18A2                         | 0.0022899         | 0.0022899            | 0.279766           | -3.57442                     | T down vs N                            | 13.119  | 15.1973   | 18.5341    | 1         |
| cg14997413  | COBL                            | 1.70E-05          | 1.70E-05             | 5.38321            | 5.38321                      | T up vs N                              | 36.565  | 26.5386   | 11.6125    | 1         |
| cg14998896  | MAP3K13                         | 4.94E-05          | 4.94E-05             | 0.213725           | -4.6789                      | T down vs N                            | 30.146  | 22.3013   | 11.8365    | 1         |
| cg14999396  | CARTPT                          | 0.00065119        | 0.000651193          | 0.279432           | -3.57868                     | T down vs N                            | 17.805  | 15.2257   | 13.6819    | 1         |
| cg14999833  | TMEM167A;SCARNA18               | 1.46E-07          | 1.46E-07             | 0.16792            | -5.95522                     | T down vs N                            | 78.31   | 29.8183   | 6.09232    | 1         |
| cg15000813  | PDGFRL                          | 0.00218339        | 0.00218339           | 0.322789           | -3.098                       | T down vs N                            | 13.283  | 11.9757   | 14.425     | 1         |
| cg15001032  | DDC;DDC                         | 0.00050122        | 0.000501219          | 0.188961           | -5.2921                      | T down vs N                            | 18.881  | 26.003    | 22.0358    | 1         |
| cg15001215  | C3orf79                         | 0.00129784        | 0.00129784           | 0.280898           | -3.56001                     | T down vs N                            | 15.141  | 15.101    | 15.958     | 1         |
| cg15002204  | CENPQ;MUT                       | 5.06E-05          | 5.06E-05             | 0.255341           | -3.91633                     | T down vs N                            | 30.002  | 17.4552   | 9.30883    | 1         |
| cg15003468  | MIR519B;MIR526B                 | 8.06E-07          | 8.06E-07             | 0.18374            | -5.44247                     | T down vs N                            | 60.395  | 26.8848   | 7.1224     | 1         |
| cg15005526  | NOTO                            | 0.00488915        | 0.00488915           | 0.273659           | -3.65418                     | T down vs N                            | 10.645  | 15.7284   | 23.641     | 1         |
| cg15013523  | NR5A2;NR5A2                     | 0.00436114        | 0.00436114           | 0.330929           | -3.0218                      | T down vs N                            | 11.002  | 11.4539   | 16.6574    | 1         |
| cg15013617  | C20orf141                       | 0.00011186        | 0.000111862          | 0.259415           | -3.85483                     | T down vs N                            | 25.786  | 17.0528   | 10.5812    | 1         |
| cg15013801  | ASCC1;C10orf104                 | 0.00070531        | 0.00070531           | 0.286801           | -3.48673                     | T down vs N                            | 17.485  | 14.6104   | 13.3698    | 1         |
| cg15015397  | KRTAP4-9                        | 1.35E-05          | 1.35E-05             | 0.267206           | -3.74243                     | T down vs N                            | 38.068  | 16.313    | 6.85638    | 1         |
| cg15015426  | OR10J5                          | 4.09E-06          | 4.09E-06             | 0.229403           | -4.35913                     | T down vs N                            | 46.56   | 20.302    | 6.97663    | 1         |
| cg15015892  | C2CD4D;LOC100132111             | 8.89E-06          | 8.89E-06             | 9.89842            | 9.89842                      | T up vs N                              | 40.88   | 49.219    | 19.2638    | 1         |
| cg15019541  | CNNM1                           | 0.0003159         | 0.000315897          | 3.09774            | 3.09774                      | T up vs N                              | 20.867  | 11.9739   | 9.18116    | 1         |
|             |                                 |                   |                      |                    |                              |                                        |         |           |            |           |
| cg15021031  | PPP2R2B;PPP2R2B;PPP2R2B;PPP2R2B | 0.00108794        | 0.00108794           | 0.317974           | -3.14491                     | T down vs N                            | 15.8    | 12.2961   | 12.4518    | 1         |
| cg15021280  | C21orf29;KRTAP12-3              | 0.00136389        | 0.00136389           | 0.287291           | -3.48079                     | T down vs N                            | 14.958  | 14.5705   | 15.5855    | 1         |
| cg15022049  | SLC29A2                         | 1.79E-05          | 1.79E-05             | 0.136409           | -7.33091                     | T down vs N                            | 36.218  | 37.1693   | 16.4201    | 1         |
| cg15023313  | ANKRD30A                        | 3.87E-05          | 3.87E-05             | 0.212419           | -4.70767                     | T down vs N                            | 31.534  | 22.4788   | 11.4056    | 1         |
| cg15023571  | STK17B                          | 1.44E-05          | 1.44E-05             | 0.281145           | -3.55689                     | T down vs N                            | 37.626  | 15.0802   | 6.41262    | 1         |
| cg15025362  | CRYGS                           | 0.00168169        | 0.00168169           | 0.298343           | -3.35185                     | T down vs N                            | 14.2    | 13.7019   | 15.4391    | 1         |
| cg15026456  | RIMBP2                          | 0.006481          | 0.006481             | 0.29305            | -3.41239                     | T down vs N                            | 9.7875  | 14.1105   | 23.067     | 1         |
| cg15026998  | LY75                            | 4.47E-05          | 4.47E-05             | 3.13531            | 3.13531                      | T up vs N                              | 30.705  | 12.2306   | 6.37328    | 1         |
| cg15027300  | GGN                             | 0.00132192        | 0.00132192           | 3.74103            | 3.74103                      | T up vs N                              | 15.073  | 16.3038   | 17.3066    | 1         |
| cg15029747  | PWRN1                           | 0.0042802         | 0.0042802            | 0.332806           | -3.00475                     | T down vs N                            | 11.061  | 11.3371   | 16.3995    | 1         |
| cg15032615  | C9orf86;C9orf86                 | 0.00046439        | 0.000464393          | 3.20374            | 3.20374                      | T up vs N                              | 19.201  | 12.6971   | 10.5804    | 1         |
| cg15032957  | TLE2                            | 8.00E-06          | 8.00E-06             | 0.277271           | -3.60659                     | T down vs N                            | 41.619  | 15.4118   | 5.92491    | 1         |
| cg15033269  | SS18L2                          | 0.00439785        | 0.00439785           | 0.33212            | -3.01096                     | T down vs N                            | 10.976  | 11.3796   | 16.5891    | 1         |
| cg15033552  | CAPN2                           | 1.51E-05          | 1.51E-05             | 0.179641           | -5.56665                     | T down vs N                            | 37.321  | 27.6056   | 11.8349    | 1         |
| cg15034848  | CRYGD                           | 0.00020119        | 0.000201191          | 0.234826           | -4.25848                     | T down vs N                            | 22.925  | 19.6628   | 13.7233    | 1         |
| cg15034857  | KCNH6;KCNH6                     | 0.00195038        | 0.00195038           | 0.2454             | -4.07497                     | T down vs N                            | 13.676  | 18.4855   | 21.6274    | 1         |
| cg15036098  | TRIM43B                         | 8.22E-07          | 8.22E-07             | 0.291061           | -3.4357                      | T down vs N                            | 60.206  | 14.2675   | 3.79167    | 1         |
| cg15036326  | RPL23A;SNORD4A                  | 9.09E-06          | 9.09E-06             | 0.241997           | -4.13229                     | T down vs N                            | 40.729  | 18.8548   | 7.40694    | 1         |
| cg15036529  | PYHIN1;PYHIN1;PYHIN1;PYHIN1     | 7.62E-06          | 7.62E-06             | 0.166595           | -6.00259                     | T down vs N                            | 41.965  | 30.0836   | 11.4701    | 1         |
| cg15038811  | CMC1                            | 4.36E-05          | 4.36E-05             | 0.131871           | -7.58315                     | T down vs N                            | 30.845  | 38.4424   | 19.9409    | 1         |
| cg15039853  | IGFL1                           | 0.0012871         | 0.0012871            | 0.29963            | -3.33745                     | T down vs N                            | 15.172  | 13.6046   | 14.3475    | 1         |
| cg15040157  | MIR548H4;NOX5                   | 7.23E-06          | 7.23E-06             | 3.21231            | 3.21231                      | T up vs N                              | 42.339  | 12.7555   | 4.82037    | 1         |
| cg15042801  | TRIM77                          | 0.00229869        | 0.00229869           | 0.288547           | -3.46564                     | T down vs N                            | 13.106  | 14.4688   | 17.6634    | 1         |
| cg15043384  | WWTR1;WWTR1;WWTR1               | 0.00013367        | 0.000133665          | 3.90275            | 3.90275                      | T up vs N                              | 24.895  | 17.3665   | 11.1613    | 1         |
| cg15044073  | SWAP70                          | 0.00272634        | 0.00272634           | 6.43287            | 6.43287                      | T up vs N                              | 12.528  | 32.4527   | 41.4465    | 1         |
| cg15046062  | HTRA4                           | 3.60E-05          | 3.60E-05             | 4.22804            | 4.22804                      | T up vs N                              | 31.95   | 19.4686   | 9.74968    | 1         |
| cg15047223  | CLEC4E                          | 0.00428941        | 0.00428941           | 0.250366           | -3.99416                     | T down vs N                            | 11.054  | 17.9621   | 25.9987    | 1         |
| cg15047774  | ASAM                            | 9.15E-05          | 9.15E-05             | 5.4974             | 5.4974                       | T up vs N                              | 26.817  | 27.2045   | 16.2313    | 1         |
| cg15048832  | TSC2D2                          | 0.00041514        | 0.000415139          | 0.331626           | -3.01544                     | T down vs N                            | 19.677  | 11.4104   | 9.27805    | 1         |
| cg15052214  | PUS1;PUS1;PUS1                  | 1.05E-05          | 1.05E-05             | 0.235451           | -4.24716                     | T down vs N                            | 39.765  | 19.5906   | 7.88263    | 1         |
| cg15053129  | ZNF365;ZNF365                   | 9.27E-06          | 9.27E-06             | 0.268204           | -3.72851                     | T down vs N                            | 40.596  | 16.221    | 6.39318    | 1         |
| cg15056638  | ILKAP                           | 0.00364977        | 0.00364977           | 0.281375           | -3.55398                     | T down vs N                            | 11.569  | 15.0608   | 20.8288    | 1         |
| cg15057670  | KLK3;KLK3;KLK3;KLK3             | 2.67E-06          | 2.67E-06             | 0.269153           | -3.71536                     | T down vs N                            | 49.941  | 16.1341   | 5.16906    | 1         |
| cg15058894  | SWAP70                          | 0.00031787        | 0.00031787           | 4.52027            | 4.52027                      | T up vs N                              | 20.839  | 21.3154   | 16.3655    | 1         |
| cg15059851  | IVL                             | 4.49E-05          | 4.49E-05             | 0.181072           | -5.52265                     | T down vs N                            | 30.675  | 27.351    | 14.266     | 1         |
| cg15065877  | GPX6                            | 0.00012962        | 0.000129618          | 0.196091           | -5.09967                     | T down vs N                            | 25.048  | 24.8598   | 15.88      | 1         |
| cg15067386  | PRSS45                          | 3.33E-06          | 3.33E-06             | 0.263153           | -3.80007                     | T down vs N                            | 48.15   | 16.6931   | 5.547      | 1         |

| Probeset ID | UCSC_REFGENE_NAME                 | p-value<br>(Type) | p-value (T vs.<br>N) | Ratio (T<br>vs. N) | Fold-<br>Change (T<br>vs. N) | Fold-Change (T vs.<br>N) (Description) | F(Type) | SS (Type) | SS (Error) | F (Error) |
|-------------|-----------------------------------|-------------------|----------------------|--------------------|------------------------------|----------------------------------------|---------|-----------|------------|-----------|
| cg15068552  | MESTIT1;MEST;MEST                 | 0.00010015        | 0.000100151          | 0.24911            | -4.0143                      | T down vs N                            | 26.349  | 18.0928   | 10.9865    | 1         |
| cg15070677  | DAXX;DAXX;DAXX;DAXX               | 0.00262732        | 0.00262732           | 0.092483           | -10.8128                     | T down vs N                            | 12.652  | 53.0863   | 67.1325    | 1         |
| cg15070894  | HCG4P6                            | 3.72E-05          | 3.72E-05             | 3.69226            | 3.69226                      | T up vs N                              | 31.769  | 15.9811   | 8.04876    | 1         |
| cg15071854  | HPDL;HPDL                         | 0.00032592        | 0.000325915          | 38.792             | 38.792                       | T up vs N                              | 20.729  | 125.343   | 96.7485    | 1         |
| cg15074838  | HLA-DRA                           | 0.00100072        | 0.00100072           | 0.223235           | -4.47959                     | T down vs N                            | 16.118  | 21.0607   | 20.9072    | 1         |
| cg15075241  | SNORA80B;ODC1                     | 9.97E-06          | 9.97E-06             | 0.148512           | -6.73348                     | T down vs N                            | 40.093  | 34.0647   | 13.5944    | 1         |
| cg15076179  | IL1F8;IL1F8                       | 0.00017115        | 0.000171147          | 0.311177           | -3.2136                      | T down vs N                            | 23.692  | 12.7643   | 8.62013    | 1         |
| cg15076824  | CRP                               | 0.000317          | 0.000316996          | 0.302667           | -3.30396                     | T down vs N                            | 20.852  | 13.3779   | 10.2652    | 1         |
| cg15077792  | CDH23;CDH23                       | 2.34E-06          | 2.34E-06             | 0.242658           | -4.12103                     | T down vs N                            | 50.991  | 18.7824   | 5.89354    | 1         |
| cg15078412  | CCDC158                           | 5.91E-06          | 5.91E-06             | 4.42229            | 4.42229                      | T up vs N                              | 43.798  | 20.7007   | 7.56224    | 1         |
| cg15078838  | BRE;RBKS;LOC100302650;BRE;BRE;BR  | 2.99E-06          | 2.99E-06             | 0.117307           | -8.52465                     | T down vs N                            | 49.006  | 43.0121   | 14.043     | 1         |
| cg15078975  | EED;EED                           | 0.00374768        | 0.00374768           | 0.329156           | -3.03808                     | T down vs N                            | 11.484  | 11.5655   | 16.1136    | 1         |
| cg15079124  | PIP                               | 6.90E-05          | 6.90E-05             | 0.176672           | -5.66022                     | T down vs N                            | 28.309  | 28.1443   | 15.907     | 1         |
| cg15080430  | COL19A1                           | 5.71E-05          | 5.71E-05             | 0.23919            | -4.18078                     | T down vs N                            | 29.337  | 19.1662   | 10.4531    | 1         |
| cg15083233  | PALM2-AKAP2;AKAP2;PALM2-AKAP2     | 0.00051627        | 0.000516268          | 0.276764           | -3.61318                     | T down vs N                            | 18.757  | 15.4558   | 13.1838    | 1         |
| cg15084543  | ELTD1;ELTD1                       | 0.0039877         | 0.0039877            | 6.75542            | 6.75542                      | T up vs N                              | 11.285  | 34.181    | 48.4606    | 1         |
| cg15084803  | CHCHD4;CHCHD4                     | 5.02E-07          | 5.02E-07             | 0.118916           | -8.40933                     | T down vs N                            | 64.989  | 42.4671   | 10.4552    | 1         |
| cg15087740  | OR2L8;OR2L13                      | 0.00036734        | 0.000367336          | 0.277948           | -3.5978                      | T down vs N                            | 20.205  | 15.3533   | 12.1581    | 1         |
| cg15089077  | TTC22                             | 0.00016447        | 0.000164472          | 4.20385            | 4.20385                      | T up vs N                              | 23.883  | 19.3139   | 12.939     | 1         |
| cg15089370  | ZDHHC11                           | 0.00015011        | 0.000150114          | 0.304593           | -3.28307                     | T down vs N                            | 24.326  | 13.2362   | 8.70605    | 1         |
| cg15090562  | PLEKHG5;PLEKHG5;PLEKHG5;PLEKHG5   | 0.00010631        | 0.000106313          | 0.297889           | -3.35695                     | T down vs N                            | 26.044  | 13.7364   | 8.43891    | 1         |
| cg15094353  | B3GNT3                            | 0.00106532        | 0.00106532           | 0.327444           | -3.05396                     | T down vs N                            | 15.879  | 11.6743   | 11.7629    | 1         |
| cg15094605  | OR2H1                             | 1.64E-07          | 1.64E-07             | 0.331551           | -3.01613                     | T down vs N                            | 77.019  | 11.4151   | 2.37137    | 1         |
| cg15094920  | CEACAM3                           | 0.00180914        | 0.00180914           | 0.258253           | -3.87218                     | T down vs N                            | 13.94   | 17.1665   | 19.7031    | 1         |
| cg15095922  | NDUFS6;MRPL36                     | 9.51E-05          | 9.51E-05             | 20.5064            | 20.5064                      | T up vs N                              | 26.618  | 85.4649   | 51.3728    | 1         |
| cg15098957  | SUPT5H;SUPT5H;SUPT5H;SUPT5H       | 0.00083758        | 0.000837581          | 0.203058           | -4.92469                     | T down vs N                            | 16.805  | 23.8057   | 22.6651    | 1         |
| cg15101483  | ANO8                              | 0.00013227        | 0.00013227           | 0.314131           | -3.18339                     | T down vs N                            | 24.947  | 12.5585   | 8.05446    | 1         |
| cg15102365  | GEMIN6                            | 0.00566695        | 0.00566695           | 0.320093           | -3.12409                     | T down vs N                            | 10.192  | 12.154    | 19.0806    | 1         |
| cg15103567  | OSBP17                            | 0.00039128        | 0.000391277          | 0.28739            | -3.47959                     | T down vs N                            | 19.932  | 14.5625   | 11.69      | 1         |
| cg15104526  | INSL3                             | 0.00164927        | 0.00164927           | 0.23461            | -4.26239                     | T down vs N                            | 14.269  | 19.6878   | 22.0756    | 1         |
| cg15108590  | CBS                               | 0.00241629        | 0.00241629           | 0.324176           | -3.08475                     | T down vs N                            | 12.936  | 11.885    | 14.7003    | 1         |
| cg15109118  | FARS2                             | 0.00129312        | 0.00129312           | 0.267044           | -3.7447                      | T down vs N                            | 15.154  | 16.3281   | 17.2393    | 1         |
| cg15110296  | LOH12CR1;LOH12CR2                 | 4.74E-05          | 4.74E-05             | 0.238059           | -4.20064                     | T down vs N                            | 30.38   | 19.2934   | 10.1613    | 1         |
| cg15112475  | ZFAND2A                           | 2.40E-05          | 2.40E-05             | 0.264254           | -3.78424                     | T down vs N                            | 34.394  | 16.5888   | 7.71714    | 1         |
| cg15112783  | MAP1LC3A;MAP1LC3A                 | 8.46E-05          | 8.46E-05             | 3.61121            | 3.61121                      | T up vs N                              | 27.227  | 15.4426   | 9.0749     | 1         |
| cg15112803  | KANK3                             | 3.26E-06          | 3.26E-06             | 0.159092           | -6.28566                     | T down vs N                            | 48.322  | 31.6505   | 10.4798    | 1         |
| cg15113766  | RUSC1;C1orf104;FDPS;FDPS;RUSC1;FD | 4.78E-05          | 4.78E-05             | 3.04221            | 3.04221                      | T up vs N                              | 30.327  | 11.5939   | 6.11678    | 1         |
| cg15114672  | PS                                | 0.00053298        | 0.000532975          | 0.314861           | -3.17601                     | T down vs N                            | 18.625  | 12.5082   | 10.7453    | 1         |
| cg15116918  | VCAN;VCAN;VCAN;VCAN               | 0.0004286         | 0.000428602          | 0.325582           | -3.07143                     | T down vs N                            | 19.541  | 11.7939   | 9.65677    | 1         |
| cg15117372  | RPTOR;RPTOR                       | 1.02E-05          | 1.02E-05             | 6.43658            | 6.43658                      | T up vs N                              | 39.934  | 32.4728   | 13.0106    | 1         |
| cg15121276  | SLC26A8;SLC26A8;SLC26A8           | 0.00011522        | 0.000115224          | 0.090955           | -10.9945                     | T down vs N                            | 25.636  | 53.8321   | 33.5974    | 1         |
| cg15122327  | CLPTM1L                           | 1.05E-05          | 1.05E-05             | 0.184211           | -5.42855                     | T down vs N                            | 39.767  | 26.8037   | 10.7843    | 1         |
| cg15122993  | GNAS;GNAS;GNAS                    | 1.63E-05          | 1.63E-05             | 4.52433            | 4.52433                      | T up vs N                              | 36.838  | 21.3408   | 9.26907    | 1         |
| cg15123159  | PCDHA7;PCDHA6;PCDHA10;PCDHA4;P    | 1.47E-06          | 1.47E-06             | 0.307219           | -3.255                       | T down vs N                            | 54.929  | 13.0457   | 3.80003    | 1         |
| cg15123519  | CDHA11;PCDHA12;PCDHA12;PCDHA8;    | 2.89E-05          | 2.89E-05             | 0.244469           | -4.09049                     | T down vs N                            | 33.225  | 18.5856   | 8.94336    | 1         |
| cg15127250  | PCDHA1;PCDHA2;PCDHA6;PCDHA1       | 0.00026028        | 0.000260284          | 3.9586             | 3.9586                       | T up vs N                              | 21.736  | 17.7308   | 13.0519    | 1         |
| cg15127791  | PTK7;PTK7;PTK7;PTK7               | 0.00026028        | 0.000260284          | 4.1427             | 4.1427                       | T up vs N                              | 10.252  | 18.9218   | 29.5302    | 1         |
| cg15129183  | LCT                               | 0.00026028        | 0.000260284          | 4.1427             | 4.1427                       | T up vs N                              | 21.736  | 17.7308   | 13.0519    | 1         |
| cg15129183  | GALNT6                            | 0.00026028        | 0.000260284          | 3.9586             | 3.9586                       | T up vs N                              | 21.736  | 17.7308   | 13.0519    | 1         |
| cg15129663  | KCNJ1;KCNJ1;KCNJ1;KCNJ1           | 0.00015122        | 0.000151223          | 0.267901           | -3.73273                     | T down vs N                            | 24.29   | 16.2489   | 10.7034    | 1         |
| cg15131371  | LOC257358                         | 1.60E-05          | 1.60E-05             | 0.133581           | -7.48607                     | T down vs N                            | 36.926  | 37.9549   | 16.4459    | 1         |
| cg15131629  | FMO1                              | 0.00274474        | 0.00274474           | 3.10161            | 3.10161                      | T up vs N                              | 12.506  | 12.0004   | 15.3537    | 1         |
| cg15132673  | ASAM                              | 0.0001027         | 0.000102696          | 0.285516           | -3.50243                     | T down vs N                            | 26.221  | 14.7157   | 8.97964    | 1         |
| cg15133734  | UTRN                              | 0.00019524        | 0.000195236          | 10.3515            | 10.3515                      | T up vs N                              | 23.066  | 51.1598   | 35.4872    | 1         |
| cg15134919  | DLL3;DLL3                         | 3.70E-05          | 3.70E-05             | 0.240928           | -4.15063                     | T down vs N                            | 31.788  | 18.9727   | 9.54957    | 1         |
| cg15136953  | UBE2V1;UBE2V1;UBE2V1;TMEM189-     | 0.00701234        | 0.00701234           | 3.13101            | 3.13101                      | T up vs N                              | 9.5536  | 12.2012   | 20.4341    | 1         |
| cg15138339  | UBE2V1;UBE2V1                     | 3.62E-05          | 3.62E-05             | 0.304059           | -3.28883                     | T down vs N                            | 31.927  | 13.2753   | 6.65293    | 1         |
| cg15139163  | PDE4DIP;PDE4DIP                   | 0.00010599        | 0.000105985          | 0.099158           | -10.0849                     | T down vs N                            | 26.06   | 50.0239   | 30.7133    | 1         |
| cg15140323  | PVRL3                             | 1.57E-05          | 1.57E-05             | 0.215185           | -4.64716                     | T down vs N                            | 37.046  | 22.1049   | 9.54693    | 1         |
| cg15141195  | COASY;COASY;COASY;COASY;COASY     | 0.00026612        | 0.000266115          | 0.300159           | -3.33156                     | T down vs N                            | 21.635  | 13.5648   | 10.0316    | 1         |
| cg15141401  | ATG7;ATG7;ATG7                    | 0.00063598        | 0.000635982          | 0.304807           | -3.28077                     | T down vs N                            | 17.901  | 13.2206   | 11.8166    | 1         |
| cg15146621  | FABP6;FABP6;FABP6                 | 2.32E-05          | 2.32E-05             | 0.317083           | -3.15375                     | T down vs N                            | 34.586  | 12.3564   | 5.71627    | 1         |
| cg15147690  | FOX2                              | 0.00072034        | 0.000720343          | 7.00957            | 7.00957                      | T up vs N                              | 17.401  | 35.5154   | 32.6569    | 1         |
| cg15147833  | OR4C11                            | 2.86E-05          | 2.86E-05             | 12.6184            | 12.6184                      | T up vs N                              | 33.318  | 60.1966   | 28.9078    | 1         |
| cg15147833  | TGFB1                             | 9.39E-06          | 9.39E-06             | 0.230893           | -4.33102                     | T down vs N                            | 40.503  | 20.1239   | 7.94959    | 1         |

| Probeset ID                        | UCSC_REFGENE_NAME             | p-value<br>(Type) | p-value (T vs.<br>N) | Ratio (T<br>vs. N) | Fold-<br>Change (T<br>vs. N) | Fold-Change (T vs.<br>N) (Description) | F(Type) | SS (Type) | SS (Error) | F (Error) |
|------------------------------------|-------------------------------|-------------------|----------------------|--------------------|------------------------------|----------------------------------------|---------|-----------|------------|-----------|
| cg15152149                         | SERPINB1                      | 0.00591726        | 0.00591726           | 6.91703            | 6.91703                      | T up vs N                              | 10.061  | 35.0323   | 55.7133    | 1         |
| cg15154318                         | BRD9;BRD9;BRD9                | 0.00029743        | 0.000297426          | 0.275679           | -3.62741                     | T down vs N                            | 21.135  | 15.5504   | 11.7723    | 1         |
| cg15155376                         | MYO1F                         | 0.00227473        | 0.00227473           | 0.321814           | -3.10738                     | T down vs N                            | 13.142  | 12.0398   | 14.6579    | 1         |
| cg15155441                         | APLNR;APLNR                   | 2.77E-05          | 2.77E-05             | 0.305903           | -3.26901                     | T down vs N                            | 33.505  | 13.1408   | 6.27529    | 1         |
| cg15156610                         | NCRNA00171                    | 0.00011287        | 0.000112869          | 0.244927           | -4.08285                     | T down vs N                            | 25.741  | 18.5363   | 11.522     | 1         |
| cg15158847                         | FAIM3;FAIM3;FAIM3;FAIM3;FAIM3 | 4.59E-05          | 4.59E-05             | 0.231759           | -4.31482                     | T down vs N                            | 30.56   | 20.0212   | 10.4825    | 1         |
| cg15159060                         | FSHB;FSHB                     | 0.00025003        | 0.000250027          | 0.326022           | -3.06728                     | T down vs N                            | 21.919  | 11.7655   | 8.58842    | 1         |
| cg15160748                         | XRCC1                         | 0.0058909         | 0.0058909            | 0.272222           | -3.67347                     | T down vs N                            | 10.074  | 15.8565   | 25.1834    | 1         |
| cg15162330                         | LIMCH1;LIMCH1;LIMCH1          | 0.00011714        | 0.000117138          | 3.04039            | 3.04039                      | T up vs N                              | 25.553  | 11.5814   | 7.25155    | 1         |
| cg15164761                         | JSRP1                         | 4.34E-06          | 4.34E-06             | 0.255041           | -3.92094                     | T down vs N                            | 46.112  | 17.4854   | 6.06703    | 1         |
| cg15165154                         | CXXC5                         | 0.00024692        | 0.00024692           | 3.15957            | 3.15957                      | T up vs N                              | 21.976  | 12.3961   | 9.02522    | 1         |
| cg15166523                         | VSIG4;VSIG4                   | 0.00026485        | 0.000264848          | 0.262574           | -3.80845                     | T down vs N                            | 21.657  | 16.7482   | 12.3735    | 1         |
| cg15166900                         | ARL6IP5                       | 0.00012757        | 0.000127566          | 0.292531           | -3.41844                     | T down vs N                            | 25.127  | 14.1512   | 9.01106    | 1         |
| cg15168615                         | DDX54;DDX54                   | 0.00089752        | 0.000897518          | 3.13794            | 3.13794                      | T up vs N                              | 16.536  | 12.2486   | 11.8514    | 1         |
| cg15169829                         | TMPSR512                      | 2.66E-06          | 2.66E-06             | 4.5267             | 4.5267                       | T up vs N                              | 49.964  | 21.3556   | 6.83865    | 1         |
| cg15172381                         | GOLGA3                        | 0.0011894         | 0.0011894            | 0.288536           | -4.19224                     | T down vs N                            | 15.465  | 19.2396   | 19.9053    | 1         |
| cg15172543                         | RAX                           | 0.00065524        | 0.000655244          | 0.214095           | -4.67083                     | T down vs N                            | 17.78   | 22.2514   | 20.0233    | 1         |
| cg15175143                         | NXP2                          | 0.0071366         | 0.0071366            | 3.41427            | 3.41427                      | T up vs N                              | 9.5018  | 14.1232   | 23.7818    | 1         |
| cg15182320                         | LOC653486;SCGB1C1             | 0.0003981         | 0.000398098          | 0.319131           | -3.13351                     | T down vs N                            | 20.528  | 11.4996   | 8.40271    | 1         |
| cg15182635                         | C10orf41;C10orf41             | 1.67E-05          | 1.67E-05             | 12.8085            | 12.8085                      | T up vs N                              | 36.651  | 60.9088   | 26.5897    | 1         |
| cg15183092                         | ATG9B;NOS3                    | 0.00050292        | 0.000502922          | 3.49584            | 3.49584                      | T up vs N                              | 18.866  | 14.6715   | 12.4425    | 1         |
| cg15183649                         | MADCAM1;MADCAM1               | 0.00109778        | 0.00109778           | 0.275303           | -3.63236                     | T down vs N                            | 15.766  | 15.5834   | 15.8148    | 1         |
| cg15184452                         | ADAMTS2;ADAMTS2               | 0.00121406        | 0.00121406           | 0.234882           | -4.25746                     | T down vs N                            | 15.388  | 19.6563   | 20.4377    | 1         |
| cg15184781                         | ZFX4                          | 9.28E-05          | 9.28E-05             | 0.275391           | -3.6312                      | T down vs N                            | 26.742  | 15.5757   | 9.31917    | 1         |
| cg15186488                         | MIR518A2                      | 0.00019085        | 0.000190849          | 0.236362           | -4.2308                      | T down vs N                            | 23.174  | 19.4862   | 13.4541    | 1         |
| cg15187790                         | FAM19A5                       | 0.00022508        | 0.000225076          | 0.299106           | -3.3433                      | T down vs N                            | 22.402  | 13.6441   | 9.7449     | 1         |
| cg15188150                         | ALOX12B                       | 0.00082389        | 0.000823894          | 0.313485           | -3.18995                     | T down vs N                            | 16.87   | 12.6032   | 11.9535    | 1         |
| cg15188182                         | C2CD4B                        | 0.00018735        | 0.000187352          | 3.41115            | 3.41115                      | T up vs N                              | 23.261  | 14.1022   | 9.70013    | 1         |
| cg15189015                         | RAB37;CD300LF                 | 6.13E-05          | 6.13E-05             | 0.057582           | -17.3666                     | T down vs N                            | 28.948  | 76.3198   | 42.183     | 1         |
| cg15191197                         | LVRN                          | 2.79E-06          | 2.79E-06             | 0.245126           | -4.07954                     | T down vs N                            | 49.557  | 18.5149   | 5.97773    | 1         |
| cg15193475                         | FAM108C1                      | 9.79E-06          | 9.79E-06             | 0.205814           | -4.85876                     | T down vs N                            | 40.213  | 23.4048   | 9.3123     | 1         |
| cg15195495                         | FSTL3                         | 6.97E-07          | 6.97E-07             | 0.251767           | -3.97192                     | T down vs N                            | 61.778  | 17.8175   | 4.61457    | 1         |
| cg15199326                         | SERPINB1                      | 1.96E-05          | 1.96E-05             | 7.63857            | 7.63857                      | T up vs N                              | 35.654  | 38.7192   | 17.3754    | 1         |
| cg15202102                         | PRKCDBP                       | 7.17E-05          | 7.17E-05             | 9.48152            | 9.48152                      | T up vs N                              | 28.104  | 47.3886   | 26.9795    | 1         |
| cg15202104                         | PPBP1                         | 1.87E-05          | 1.87E-05             | 0.235216           | -4.25142                     | T down vs N                            | 35.933  | 19.6178   | 8.73535    | 1         |
| cg15202552                         | FCRL3                         | 3.88E-05          | 3.88E-05             | 0.248038           | -4.03165                     | T down vs N                            | 31.514  | 18.2052   | 9.24315    | 1         |
| cg15203028                         | MUC6                          | 0.00036476        | 0.000364756          | 0.192599           | -5.19214                     | T down vs N                            | 20.236  | 25.4112   | 20.0924    | 1         |
| cg15205435                         | CHD5                          | 0.00147793        | 0.00147793           | 9.13614            | 9.13614                      | T up vs N                              | 14.665  | 45.838    | 50.0112    | 1         |
| cg15209277                         | ROR1;ROR1                     | 0.00036866        | 0.000368655          | 0.30062            | -3.32645                     | T down vs N                            | 20.189  | 13.5302   | 10.7227    | 1         |
| cg15215375                         | CILP2                         | 0.0001387         | 0.000138704          | 0.260931           | -3.83243                     | T down vs N                            | 24.713  | 16.9058   | 10.9455    | 1         |
| TAGAP;TAGAP;TAGAP;TAGAP;TAGAP;     |                               |                   |                      |                    |                              |                                        |         |           |            |           |
| cg15217044                         | TAGAP                         | 2.48E-06          | 2.48E-06             | 0.095635           | -10.4565                     | T down vs N                            | 50.539  | 51.6024   | 16.3367    | 1         |
| cg15219347                         | PLVAP                         | 7.34E-06          | 7.34E-06             | 0.33102            | -3.02096                     | T down vs N                            | 42.235  | 11.4482   | 4.33697    | 1         |
| cg15219685                         | KIAA1919                      | 0.00018895        | 0.000188949          | 0.324869           | -3.07816                     | T down vs N                            | 23.221  | 11.84     | 8.1582     | 1         |
| cg15223899                         | C22orf45;C22orf45;UPB1        | 0.00630776        | 0.00630776           | 3.25663            | 3.25663                      | T up vs N                              | 9.8685  | 13.0568   | 21.1692    | 1         |
| cg15224348                         | SFRS16                        | 0.00011665        | 0.000116648          | 0.247109           | -4.0468                      | T down vs N                            | 25.575  | 18.3033   | 11.451     | 1         |
| cg15225701                         | FER                           | 0.00127579        | 0.00127579           | 0.236125           | -4.23505                     | T down vs N                            | 15.204  | 19.5133   | 20.5348    | 1         |
| cg15226135                         | SBF1                          | 7.05E-05          | 7.05E-05             | 0.311894           | -3.20622                     | T down vs N                            | 28.189  | 12.714    | 7.21654    | 1         |
| cg15226275                         | FRK                           | 2.68E-05          | 2.68E-05             | 0.185702           | -5.38497                     | T down vs N                            | 33.698  | 26.5488   | 12.6055    | 1         |
| cg15227682                         | ERBB2;PGAP3                   | 0.0012781         | 0.0012781            | 0.257167           | -3.88853                     | T down vs N                            | 15.197  | 17.2735   | 18.1857    | 1         |
| cg15227848                         | RAB5A                         | 2.05E-05          | 2.05E-05             | 0.090271           | -11.0777                     | T down vs N                            | 35.354  | 54.1712   | 24.5161    | 1         |
| cg15228441                         | RPTOR;RPTOR                   | 0.00022534        | 0.000225344          | 0.27037            | -3.69863                     | T down vs N                            | 22.397  | 16.0233   | 11.447     | 1         |
| cg15228639                         | PLA2G4E                       | 1.07E-05          | 1.07E-05             | 0.306761           | -3.25987                     | T down vs N                            | 39.614  | 13.0788   | 5.28249    | 1         |
| SEPT9;SEPT9;SEPT9;SEPT9;SEPT9;SEPT |                               |                   |                      |                    |                              |                                        |         |           |            |           |
| cg15229994                         | 9;SEPT9                       | 0.00227809        | 0.00227809           | 0.233488           | -4.28287                     | T down vs N                            | 13.137  | 19.8182   | 24.1369    | 1         |
| cg15231462                         | OR2G3                         | 8.31E-05          | 8.31E-05             | 0.137304           | -7.28312                     | T down vs N                            | 27.317  | 36.9256   | 21.6276    | 1         |
| cg15233131                         | LPPR3                         | 2.36E-05          | 2.36E-05             | 0.29653            | -3.37234                     | T down vs N                            | 34.474  | 13.8404   | 6.42356    | 1         |
| cg15235999                         | ZNF578                        | 1.76E-05          | 1.76E-05             | 5.98719            | 5.98719                      | T up vs N                              | 36.339  | 29.9975   | 13.2079    | 1         |
| cg15237644                         | KDM2B;KDM2B                   | 0.00076643        | 0.00076643           | 0.309802           | -3.22787                     | T down vs N                            | 17.154  | 12.8613   | 11.9959    | 1         |
| cg15237937                         | SNORD53;WDR43                 | 0.00015646        | 0.000156464          | 0.305677           | -3.27143                     | T down vs N                            | 24.124  | 13.1572   | 8.7263     | 1         |
| cg15238224                         | TRIM31                        | 0.00369968        | 0.00369968           | 0.291614           | -3.42919                     | T down vs N                            | 11.525  | 14.2237   | 19.7458    | 1         |
| cg15239179                         | CD44;CD44;CD44;CD44;CD44      | 7.07E-06          | 7.07E-06             | 0.205122           | -4.87516                     | T down vs N                            | 42.503  | 23.5048   | 8.84813    | 1         |
| cg15240320                         | OR8U1;OR8U8                   | 6.65E-05          | 6.65E-05             | 0.192746           | -5.18816                     | T down vs N                            | 28.509  | 25.3876   | 14.2482    | 1         |
| HFE;HFE;HFE;HFE;HFE;HFE;HFE;HFE;H  |                               |                   |                      |                    |                              |                                        |         |           |            |           |
| cg15240476                         | FE                            | 7.70E-05          | 7.70E-05             | 0.2788             | -3.5868                      | T down vs N                            | 27.72   | 15.2799   | 8.81965    | 1         |
| cg15241084                         | TLR7                          | 0.0008328         | 0.000832804          | 0.216356           | -4.622                       | T down vs N                            | 16.828  | 21.949    | 20.8695    | 1         |
| cg15241708                         | CNOT6                         | 0.00104102        | 0.00104102           | 0.233447           | -4.28362                     | T down vs N                            | 15.967  | 19.8229   | 19.8639    | 1         |
| cg15242225                         | RUNX1                         | 0.0010745         | 0.0010745            | 0.313179           | -3.19306                     | T down vs N                            | 15.847  | 12.6244   | 12.7463    | 1         |
| cg15243034                         | USP35                         | 3.46E-05          | 3.46E-05             | 4.51741            | 4.51741                      | T up vs N                              | 32.193  | 21.2975   | 10.5851    | 1         |
| cg15243856                         | MATN4;MATN4;RBPJL;MATN4       | 0.0002009         | 0.000200898          | 4.4355             | 4.4355                       | T up vs N                              | 22.932  | 20.7838   | 14.5013    | 1         |
| cg15244874                         | RAB19                         | 5.91E-05          | 5.91E-05             | 0.323032           | -3.09567                     | T down vs N                            | 29.149  | 11.9597   | 6.5647     | 1         |
| cg15246712                         | EBF2                          | 5.70E-06          | 5.70E-06             | 0.216793           | -4.6127                      | T down vs N                            | 44.06   | 21.8912   | 7.94953    | 1         |

| Probeset ID | UCSC_REFGENE_NAME             | p-value<br>(Type) | p-value (T vs.<br>N) | Ratio (T<br>vs. N) | Fold-<br>Change (T<br>vs. N) | Fold-Change (T vs.<br>N) (Description) | F(Type) | SS (Type) | SS (Error) | F (Error) |
|-------------|-------------------------------|-------------------|----------------------|--------------------|------------------------------|----------------------------------------|---------|-----------|------------|-----------|
| cg15246805  | EYA4;EYA4;EYA4                | 0.00252099        | 0.00252099           | 0.198493           | -5.03797                     | T down vs N                            | 12.792  | 24.4897   | 30.6317    | 1         |
| cg15248828  | GPRIN2                        | 0.00144164        | 0.00144164           | 3.0421             | 3.0421                       | T up vs N                              | 14.755  | 11.5931   | 12.571     | 1         |
| cg15251385  | SLC2A14                       | 0.00574673        | 0.00574673           | 4.66769            | 4.66769                      | T up vs N                              | 10.356  | 20.9242   | 30.3067    | 1         |
| cg15251598  | EBF3                          | 0.00158159        | 0.00158159           | 3.45119            | 3.45119                      | T up vs N                              | 14.42   | 14.3717   | 15.9466    | 1         |
| cg15252509  | MALT1;MALT1                   | 4.93E-06          | 4.93E-06             | 0.168499           | -5.93474                     | T down vs N                            | 45.147  | 29.7032   | 10.5268    | 1         |
| cg15255329  | LAIR2;LAIR2                   | 0.00037154        | 0.000371535          | 0.331861           | -3.01331                     | T down vs N                            | 20.156  | 11.3958   | 9.04629    | 1         |
| cg15256305  | SRCIN1                        | 1.18E-06          | 1.18E-06             | 4.30404            | 4.30404                      | T up vs N                              | 56.914  | 19.9527   | 5.60919    | 1         |
| cg15262728  | ITM2C;ITM2C;ITM2C             | 0.00568938        | 0.00568938           | 0.303474           | -3.29518                     | T down vs N                            | 10.18   | 13.3183   | 20.9331    | 1         |
| cg15264404  | NPFFR2;NPFFR2;NPFFR2          | 0.00013285        | 0.000132849          | 0.282684           | -3.53751                     | T down vs N                            | 24.926  | 14.9506   | 9.59699    | 1         |
| cg15264991  | PTPN6;PTPN6;PTPN6             | 1.61E-07          | 1.61E-07             | 0.283194           | -3.53114                     | T down vs N                            | 77.185  | 14.908    | 3.09037    | 1         |
| cg15269541  | ADAL;ADAL                     | 0.00067201        | 0.000672009          | 0.295943           | -3.37903                     | T down vs N                            | 17.679  | 13.8856   | 12.5671    | 1         |
| cg15271461  | SIGLEC1                       | 1.38E-06          | 1.38E-06             | 0.328303           | -3.04597                     | T down vs N                            | 55.484  | 11.6196   | 3.35079    | 1         |
| cg15275890  | SLC25A17                      | 7.95E-05          | 7.95E-05             | 0.316937           | -3.1552                      | T down vs N                            | 27.552  | 12.3663   | 7.18144    | 1         |
| cg15277914  | DHX36;DHX36                   | 2.24E-05          | 2.24E-05             | 0.173288           | -5.77075                     | T down vs N                            | 34.816  | 28.7758   | 13.2244    | 1         |
| cg15278374  | GPR133                        | 0.00327186        | 0.00327186           | 0.28862            | -3.46476                     | T down vs N                            | 11.924  | 14.4629   | 19.4065    | 1         |
| cg15278386  | COL20A1                       | 6.78E-05          | 6.78E-05             | 0.283654           | -3.52542                     | T down vs N                            | 28.4    | 14.8697   | 8.37746    | 1         |
| cg15288800  | C17orf100;MED31;C17orf100     | 0.00100936        | 0.00100936           | 0.328017           | -3.04863                     | T down vs N                            | 16.085  | 11.6378   | 11.5766    | 1         |
| cg15289534  | SYNPO2;SYNPO2;SYNPO2          | 8.44E-06          | 8.44E-06             | 0.30452            | -3.28385                     | T down vs N                            | 41.244  | 13.2415   | 5.13689    | 1         |
| cg15290965  | CYB5R2                        | 0.00038323        | 0.000383227          | 3.264              | 3.264                        | T up vs N                              | 20.021  | 13.1068   | 10.4743    | 1         |
| cg15299568  | C4orf22                       | 9.48E-05          | 9.48E-05             | 0.274369           | -3.64473                     | T down vs N                            | 26.633  | 15.6657   | 9.41113    | 1         |
| cg15299947  | POTEA;POTEA                   | 5.66E-06          | 5.66E-06             | 0.270139           | -3.7018                      | T down vs N                            | 44.115  | 16.0443   | 5.81911    | 1         |
| cg15304679  | POM121L12                     | 7.04E-05          | 7.04E-05             | 0.327005           | -3.05806                     | T down vs N                            | 28.196  | 11.7024   | 6.6407     | 1         |
| cg15306060  | RPL3;RNU86;RPL3               | 0.0004523         | 0.000452295          | 0.308105           | -3.24565                     | T down vs N                            | 19.312  | 12.9822   | 10.7555    | 1         |
| cg15307285  | FANCF                         | 0.00028341        | 0.000283408          | 0.183441           | -5.45135                     | T down vs N                            | 21.351  | 26.9366   | 20.1856    | 1         |
| cg15316289  | ALG12;CRELD2;CRELD2           | 0.0003407         | 0.000340695          | 0.304537           | -3.28368                     | T down vs N                            | 20.534  | 13.2403   | 10.317     | 1         |
| cg15317815  | OXTR                          | 5.51E-06          | 5.51E-06             | 8.39408            | 8.39408                      | T up vs N                              | 44.32   | 42.3947   | 15.3048    | 1         |
| cg15318627  | NOTCH4                        | 8.89E-06          | 8.89E-06             | 0.29612            | -3.37701                     | T down vs N                            | 40.887  | 13.8719   | 5.42843    | 1         |
| cg15319032  | BTNL2                         | 0.00072244        | 0.000722444          | 0.26176            | -3.82029                     | T down vs N                            | 17.389  | 16.8261   | 15.4821    | 1         |
| cg15320001  | MRAS;MRAS                     | 1.33E-06          | 1.33E-06             | 0.273519           | -3.65605                     | T down vs N                            | 55.811  | 15.7409   | 4.51266    | 1         |
| cg15320272  | CELSR3                        | 4.60E-05          | 4.60E-05             | 0.268191           | -3.72868                     | T down vs N                            | 30.544  | 16.2222   | 8.4977     | 1         |
| cg15320948  | FAM18B                        | 0.00048021        | 0.000480214          | 5.97062            | 5.97062                      | T up vs N                              | 19.06   | 29.9046   | 25.1037    | 1         |
| cg15320998  | ZNF12                         | 0.00015015        | 0.00015015           | 0.301566           | -3.31602                     | T down vs N                            | 24.324  | 13.4595   | 8.85334    | 1         |
| cg15322542  | KRTAP17-1;KRTAP17-1           | 2.76E-05          | 2.76E-05             | 0.162675           | -6.14721                     | T down vs N                            | 33.536  | 30.8882   | 14.7369    | 1         |
| cg15323937  | CDC42BPG                      | 0.00048634        | 0.000486339          | 0.245696           | -4.07006                     | T down vs N                            | 19.007  | 18.4537   | 15.5345    | 1         |
| cg15325704  | MGC16275                      | 5.02E-05          | 5.02E-05             | 0.30054            | -3.32734                     | T down vs N                            | 30.056  | 13.5362   | 7.20597    | 1         |
| cg15325759  | PHEX                          | 0.00171631        | 0.00171631           | 0.263179           | -3.7997                      | T down vs N                            | 14.127  | 16.6907   | 18.9034    | 1         |
| cg15329277  | MEA1;PPP2R5D;PPP2R5D;PPP2R5D  | 0.00518991        | 0.00518991           | 0.275834           | -3.62536                     | T down vs N                            | 10.461  | 15.5368   | 23.7645    | 1         |
| cg15329483  | SSX7                          | 2.83E-06          | 2.83E-06             | 0.29379            | -3.4038                      | T down vs N                            | 49.47   | 14.0526   | 4.545      | 1         |
| cg15331332  | HLA-F;HLA-F;HLA-F             | 0.00179053        | 0.00179053           | 4.04446            | 4.04446                      | T up vs N                              | 13.977  | 18.2882   | 20.9356    | 1         |
| cg15335139  | SLC38A3                       | 0.00103792        | 0.00103792           | 0.318221           | -3.14247                     | T down vs N                            | 15.978  | 12.2794   | 12.2961    | 1         |
| cg15342452  | ADAM12;ADAM12                 | 0.00062917        | 0.00062917           | 0.28945            | -3.45483                     | T down vs N                            | 17.945  | 14.3961   | 12.836     | 1         |
| cg15343797  | NLRX1;PDZD3;NLRX1;PDZD3       | 0.00068093        | 0.000680925          | 0.272092           | -3.67522                     | T down vs N                            | 17.626  | 15.8681   | 14.4046    | 1         |
| cg15346191  | GAL3ST2                       | 0.00079917        | 0.00079917           | 14.2773            | 14.2773                      | T up vs N                              | 16.989  | 66.205    | 62.3499    | 1         |
| cg15346781  | RSAD2                         | 0.00017401        | 0.000174006          | 0.30495            | -3.27923                     | T down vs N                            | 23.613  | 13.2102   | 8.95123    | 1         |
| cg15346830  | COL11A2;COL11A2;COL11A2       | 6.79E-07          | 6.79E-07             | 0.096824           | -10.3281                     | T down vs N                            | 62.022  | 51.0605   | 13.1723    | 1         |
| cg15347156  | MMRN2                         | 0.00059923        | 0.000599232          | 3.1592             | 3.1592                       | T up vs N                              | 18.143  | 12.3936   | 10.9296    | 1         |
| cg15347342  | NR2E1                         | 2.41E-05          | 2.41E-05             | 0.271521           | -3.68296                     | T down vs N                            | 34.367  | 15.9194   | 7.4114     | 1         |
| cg15351186  | SULF1;SULF1                   | 0.00076778        | 0.000767778          | 0.312397           | -3.20105                     | T down vs N                            | 17.147  | 12.6788   | 11.8305    | 1         |
| cg15351652  | TACC2;TACC2                   | 3.47E-05          | 3.47E-05             | 0.279369           | -3.57949                     | T down vs N                            | 32.168  | 15.2311   | 7.57585    | 1         |
| cg15351688  | AMDHD1                        | 2.11E-05          | 2.11E-05             | 6.26167            | 6.26167                      | T up vs N                              | 35.181  | 31.5189   | 14.3346    | 1         |
| cg15352315  | CD302                         | 0.00016418        | 0.000164177          | 0.239363           | -4.17775                     | T down vs N                            | 23.892  | 19.1468   | 12.8224    | 1         |
| cg15352367  | RBM9;RBM9;RBM9;RBM9;RBM9;RBM9 | 0.0001292         | 0.000129202          | 0.309074           | -3.23547                     | T down vs N                            | 25.064  | 12.913    | 8.24336    | 1         |
| cg15353603  | DPP4                          | 0.00121763        | 0.00121763           | 0.314404           | -3.18062                     | T down vs N                            | 15.377  | 12.5396   | 13.0473    | 1         |
| cg15356923  | FAM19A4;FAM19A4               | 0.00069224        | 0.000692244          | 12.4585            | 12.4585                      | T up vs N                              | 17.56   | 59.5924   | 54.2998    | 1         |
| cg15356966  | LMO2                          | 0.00109301        | 0.00109301           | 0.320258           | -3.12248                     | T down vs N                            | 15.782  | 12.143    | 12.3104    | 1         |
| cg15357118  | UGGT1;UGGT1                   | 0.00046518        | 0.000465179          | 0.265011           | -3.77342                     | T down vs N                            | 19.194  | 16.5176   | 13.7691    | 1         |
| cg15358984  | GALNT9                        | 6.11E-06          | 6.11E-06             | 0.310089           | -3.22489                     | T down vs N                            | 43.554  | 12.841    | 4.71729    | 1         |
| cg15360181  | SLC9A9                        | 0.00051443        | 0.000514425          | 0.241583           | -4.13936                     | T down vs N                            | 18.772  | 18.9003   | 16.1093    | 1         |
| cg15361661  | ARHGAP25;ARHGAP25;ARHGAP25;AR | 8.56E-06          | 8.56E-06             | 0.169719           | -5.89208                     | T down vs N                            | 41.15   | 29.463    | 11.456     | 1         |
| cg15364850  | HGAP25                        | 6.92E-06          | 6.92E-06             | 0.243131           | -4.11301                     | T down vs N                            | 42.656  | 18.7308   | 7.02588    | 1         |
| cg15367592  | FLJ30058                      | 5.55E-05          | 5.55E-05             | 0.292772           | -3.41562                     | T down vs N                            | 29.49   | 14.1323   | 7.66757    | 1         |
| cg15368264  | FOLR3                         | 0.00036698        | 0.000366975          | 0.22192            | -4.50613                     | T down vs N                            | 20.209  | 21.227    | 16.8059    | 1         |
| cg15370309  | C6orf191;C6orf191             | 1.70E-08          | 1.70E-08             | 0.251397           | -3.97776                     | T down vs N                            | 107.1   | 17.8555   | 2.6675     | 1         |
| cg15370309  | NTN1                          |                   |                      |                    |                              |                                        |         |           |            |           |
| cg15370982  | CUGBP2;CUGBP2;CUGBP2;CUGBP2   | 0.00108923        | 0.00108923           | 7.16811            | 7.16811                      | T up vs N                              | 15.795  | 36.3359   | 36.8065    | 1         |
| cg15371711  | MYL9;MYL9                     | 0.00081561        | 0.000815605          | 5.64546            | 5.64546                      | T up vs N                              | 16.909  | 28.0596   | 26.5507    | 1         |
| cg15371806  | KIF25;KIF25                   | 3.04E-06          | 3.04E-06             | 0.188902           | -5.29376                     | T down vs N                            | 48.872  | 26.0128   | 8.5162     | 1         |
| cg15383276  | RASL10A;RASL10A               | 0.00070232        | 0.000702316          | 5.25282            | 5.25282                      | T up vs N                              | 17.502  | 25.771    | 23.5598    | 1         |
| cg15384598  | JPH4;JPH4                     | 2.45E-05          | 2.45E-05             | 51.924             | 51.924                       | T up vs N                              | 34.245  | 146.119   | 68.2704    | 1         |

| Probeset ID                                                                             | UCSC_REFGENE_NAME            | p-value<br>(Type) | p-value (T vs.<br>N) | Ratio (T<br>vs. N) | Fold-<br>Change (T<br>vs. N) | Fold-Change (T vs.<br>N) (Description) | F(Type) | SS (Type) | SS (Error) | F (Error) |
|-----------------------------------------------------------------------------------------|------------------------------|-------------------|----------------------|--------------------|------------------------------|----------------------------------------|---------|-----------|------------|-----------|
| cg15387943                                                                              | MRPS36                       | 0.00024353        | 0.000243534          | 0.279188           | -3.58181                     | T down vs N                            | 22.843  | 14.3498   | 9.42298    | 1         |
| cg15389191                                                                              | XRRA1                        | 2.27E-06          | 2.27E-06             | 0.244096           | -4.09675                     | T down vs N                            | 51.24   | 18.626    | 5.81606    | 1         |
| cg15391531                                                                              | MBP;MBP;MBP;MBP              | 0.00439171        | 0.00439171           | 4.17972            | 4.17972                      | T up vs N                              | 10.98   | 19.1594   | 27.9192    | 1         |
| cg15391601                                                                              | FFAR3                        | 7.55E-05          | 7.55E-05             | 0.195804           | -5.10714                     | T down vs N                            | 27.823  | 24.9045   | 14.3217    | 1         |
| cg15392111                                                                              | NDUFC1                       | 9.74E-07          | 9.74E-07             | 0.268926           | -3.7185                      | T down vs N                            | 58.635  | 16.1549   | 4.40825    | 1         |
| cg15393221                                                                              | PRX;PRX                      | 0.00022229        | 0.000222289          | 0.311066           | -3.21476                     | T down vs N                            | 22.46   | 12.7721   | 9.09865    | 1         |
| cg15396238                                                                              | SRD5A1P1                     | 0.00016624        | 0.00016624           | 0.305515           | -3.27316                     | T down vs N                            | 23.832  | 13.169    | 8.84134    | 1         |
| CACNA1C;CACNA1C;CACNA1C;CACNA1C;CACNA1C;CACNA1C;CACNA1C;CACNA1C;CACNA1C;CACNA1C;CACNA1C |                              |                   |                      |                    |                              |                                        |         |           |            |           |
| cg15397593                                                                              | NA1C;CACNA1C;CACNA1C;CACNA1C | 0.00240284        | 0.00240284           | 0.218174           | -4.58349                     | T down vs N                            | 12.955  | 21.7097   | 26.8127    | 1         |
| cg15398400                                                                              | C10orf82                     | 0.0001517         | 0.000151702          | 7.44672            | 7.44672                      | T up vs N                              | 24.274  | 37.7565   | 24.8865    | 1         |
| cg15401418                                                                              | SEPT9;SEPT9;SEPT9;SEPT9      | 9.65E-05          | 9.65E-05             | 0.149368           | -6.69488                     | T down vs N                            | 26.538  | 33.8596   | 20.4142    | 1         |
| cg15401477                                                                              | PSG9                         | 1.55E-05          | 1.55E-05             | 0.189463           | -5.27807                     | T down vs N                            | 37.15   | 25.9202   | 11.1636    | 1         |
| cg15402210                                                                              | LOC100132215                 | 0.0014187         | 0.0014187            | 5.53467            | 5.53467                      | T up vs N                              | 14.814  | 27.4207   | 29.6164    | 1         |
| cg15402626                                                                              | GNB1L                        | 5.33E-05          | 5.33E-05             | 0.289055           | -3.45955                     | T down vs N                            | 29.713  | 14.4279   | 7.76932    | 1         |
| cg15404665                                                                              | DPP9                         | 7.33E-05          | 7.33E-05             | 4.08817            | 4.08817                      | T up vs N                              | 27.982  | 18.5706   | 10.6186    | 1         |
| cg15406387                                                                              | ENPEP;ENPEP                  | 2.13E-05          | 2.13E-05             | 0.315009           | -3.17452                     | T down vs N                            | 35.129  | 12.4981   | 5.69239    | 1         |
| cg15406585                                                                              | MPP7                         | 5.07E-06          | 5.07E-06             | 0.114628           | -8.72384                     | T down vs N                            | 44.934  | 43.9443   | 15.6476    | 1         |
| cg15409097                                                                              | GEFT;GEFT                    | 0.00046464        | 0.000464639          | 6.98487            | 6.98487                      | T up vs N                              | 19.199  | 35.3867   | 29.491     | 1         |
| cg15409133                                                                              | GALNT9                       | 0.00082564        | 0.000825637          | 3.15841            | 3.15841                      | T up vs N                              | 16.861  | 12.3883   | 11.7554    | 1         |
| cg15410343                                                                              | LOC650226                    | 0.00010928        | 0.000109279          | 0.213736           | -4.67867                     | T down vs N                            | 25.904  | 22.2998   | 13.7737    | 1         |
| cg15411303                                                                              | C4orf17                      | 0.00041498        | 0.000414975          | 0.274602           | -3.64164                     | T down vs N                            | 19.679  | 15.6451   | 12.7203    | 1         |
| cg15415945                                                                              | C6orf47                      | 0.00230743        | 0.00230743           | 0.166904           | -5.99149                     | T down vs N                            | 14.828  | 22.8735   | 18.5117    | 1         |
| cg15416877                                                                              | NR2E1                        | 0.00010835        | 0.000108346          | 0.299118           | -3.34316                     | T down vs N                            | 25.948  | 13.6432   | 8.41276    | 1         |
| cg15417488                                                                              | ANAPC5                       | 3.49E-05          | 3.49E-05             | 0.15458            | -6.46913                     | T down vs N                            | 32.136  | 32.649    | 16.2554    | 1         |
| cg15417875                                                                              | WDR66                        | 0.0002267         | 0.000226697          | 5.36288            | 5.36288                      | T up vs N                              | 22.369  | 26.4193   | 18.8972    | 1         |
| cg15418419                                                                              | HLA-DMA                      | 4.30E-05          | 4.30E-05             | 0.265755           | -3.76286                     | T down vs N                            | 30.922  | 16.4479   | 8.51063    | 1         |
| cg15418499                                                                              | IL18                         | 0.00263218        | 0.00263218           | 0.32204            | -3.10521                     | T down vs N                            | 12.646  | 12.0249   | 15.2141    | 1         |
| cg15418809                                                                              | GNPNAT1                      | 0.00019754        | 0.000197541          | 0.200097           | -4.99758                     | T down vs N                            | 23.011  | 24.2465   | 16.8591    | 1         |
| cg15421324                                                                              | PAK2                         | 0.00011801        | 0.000118009          | 0.291997           | -3.4247                      | T down vs N                            | 25.516  | 14.1934   | 8.90002    | 1         |
| cg15426006                                                                              | UBAC2;UBAC2;UBAC2            | 0.00552693        | 0.00552693           | 0.258686           | -3.86568                     | T down vs N                            | 10.268  | 17.124    | 26.6836    | 1         |
| cg15427520                                                                              | CD44;CD44;CD44;CD44;CD44     | 7.16E-06          | 7.16E-06             | 0.236994           | -4.21952                     | T down vs N                            | 42.413  | 19.4142   | 7.32378    | 1         |
| cg15434398                                                                              | ANKRD33;ANKRD33              | 1.38E-06          | 1.38E-06             | 0.297006           | -3.36694                     | T down vs N                            | 55.492  | 13.8039   | 3.9801     | 1         |
| cg15439294                                                                              | NLRP5                        | 4.82E-05          | 4.82E-05             | 0.265475           | -3.76684                     | T down vs N                            | 30.277  | 16.4742   | 8.70587    | 1         |
| cg15442678                                                                              | ROBO1;ROBO1;ROBO1;ROBO1      | 0.00355282        | 0.00355282           | 0.295304           | -3.38634                     | T down vs N                            | 11.656  | 13.9349   | 19.128     | 1         |
| cg15442737                                                                              | TRAPPC9;TRAPPC9              | 1.38E-05          | 1.38E-05             | 0.13423            | -7.4499                      | T down vs N                            | 37.896  | 37.7725   | 15.9479    | 1         |
| cg15443535                                                                              | RIN3                         | 9.04E-06          | 9.04E-06             | 7.42156            | 7.42156                      | T up vs N                              | 40.765  | 37.6293   | 14.7694    | 1         |
| cg15443952                                                                              | C7orf52                      | 3.15E-07          | 3.15E-07             | 4.82591            | 4.82591                      | T up vs N                              | 69.793  | 23.2044   | 5.31962    | 1         |
| cg15444648                                                                              | FLJ42709;FLJ42709;FLJ42709   | 0.00429314        | 0.00429314           | 3.77985            | 3.77985                      | T up vs N                              | 11.051  | 16.5599   | 23.9752    | 1         |
| cg15446115                                                                              | C16orf74                     | 0.00052456        | 0.000524563          | 0.324153           | -3.08496                     | T down vs N                            | 18.691  | 11.8865   | 10.1752    | 1         |
| cg15446373                                                                              | KRT35                        | 1.43E-06          | 1.43E-06             | 0.256648           | -3.89639                     | T down vs N                            | 55.205  | 17.325    | 5.02126    | 1         |
| cg15447697                                                                              | PARP15;PARP15                | 5.52E-05          | 5.52E-05             | 0.207194           | -4.82639                     | T down vs N                            | 29.52   | 23.2074   | 12.5787    | 1         |
| cg15448445                                                                              | CMKLR1;CMKLR1;CMKLR1         | 0.00029831        | 0.000298308          | 0.143758           | -6.95616                     | T down vs N                            | 21.122  | 35.2369   | 26.6925    | 1         |
| cg15449127                                                                              | DUXA                         | 0.00051862        | 0.000518624          | 0.250043           | -3.99932                     | T down vs N                            | 18.738  | 17.9956   | 15.3658    | 1         |
| cg15451020                                                                              | NLRP6                        | 2.21E-05          | 2.21E-05             | 0.278279           | -3.59352                     | T down vs N                            | 34.878  | 15.3247   | 7.03012    | 1         |
| cg15452319                                                                              | ITGB1BP3                     | 3.51E-05          | 3.51E-05             | 0.241734           | -4.13678                     | T down vs N                            | 32.098  | 18.8837   | 9.41316    | 1         |
| cg15453204                                                                              | HCN4                         | 0.00107125        | 0.00107125           | 0.204152           | -4.89832                     | T down vs N                            | 15.858  | 23.6456   | 23.8568    | 1         |
| cg15453482                                                                              | OVOL1                        | 0.00040229        | 0.000402291          | 0.200618           | -4.9846                      | T down vs N                            | 19.812  | 24.1682   | 19.518     | 1         |
| cg15454486                                                                              | OBFC2A;OBFC2A                | 0.00568845        | 0.00568845           | 0.203059           | -4.92468                     | T down vs N                            | 10.388  | 22.4053   | 32.3518    | 1         |
| cg15454534                                                                              | OR2T1                        | 3.06E-05          | 3.06E-05             | 0.213022           | -4.69434                     | T down vs N                            | 32.915  | 22.3966   | 10.8871    | 1         |
| cg15456115                                                                              | B3GNT3                       | 9.58E-07          | 9.58E-07             | 0.178647           | -5.59762                     | T down vs N                            | 58.787  | 27.7843   | 7.56204    | 1         |
| cg15456502                                                                              | FLT3                         | 4.68E-05          | 4.68E-05             | 0.181977           | -5.49519                     | T down vs N                            | 30.443  | 27.1917   | 14.2911    | 1         |
| cg15456555                                                                              | H1FNT                        | 7.05E-07          | 7.05E-07             | 0.15935            | -6.2755                      | T down vs N                            | 61.667  | 31.5948   | 8.19748    | 1         |
| cg15459780                                                                              | TXNRD1                       | 4.11E-06          | 4.11E-06             | 16.2996            | 16.2996                      | T up vs N                              | 46.523  | 72.9667   | 25.0946    | 1         |
| cg15460872                                                                              | IGF1R                        | 3.86E-05          | 3.86E-05             | 3.32786            | 3.32786                      | T up vs N                              | 31.55   | 13.5397   | 6.86649    | 1         |
| cg15464226                                                                              | TNFSF11;TNFSF11              | 0.00039513        | 0.000395126          | 0.278126           | -3.59549                     | T down vs N                            | 19.889  | 15.3378   | 12.3386    | 1         |
| cg15465823                                                                              | COL2A1;COL2A1                | 0.00194028        | 0.00194028           | 0.217675           | -4.594                       | T down vs N                            | 13.694  | 21.7751   | 25.4424    | 1         |
| cg15467503                                                                              | TACC3                        | 3.98E-07          | 3.98E-07             | 0.22613            | -4.42223                     | T down vs N                            | 67.336  | 20.7003   | 4.9187     | 1         |
| cg15469709                                                                              | C1orf161                     | 3.75E-06          | 3.75E-06             | 0.175445           | -5.69978                     | T down vs N                            | 47.226  | 28.3709   | 9.61191    | 1         |
| cg15469871                                                                              | LOC387646                    | 0.00022738        | 0.00022738           | 3.97534            | 3.97534                      | T up vs N                              | 22.355  | 17.8397   | 12.7683    | 1         |
| cg15472739                                                                              | LOC388692                    | 0.00061738        | 0.000617378          | 6.28765            | 6.28765                      | T up vs N                              | 18.022  | 31.6614   | 28.1099    | 1         |
| cg15473346                                                                              | UCK2                         | 8.33E-07          | 8.33E-07             | 0.272825           | -3.66536                     | T down vs N                            | 64.341  | 14.8731   | 3.4674     | 1         |
| cg15473502                                                                              | ST6GAL1;ST6GAL1              | 7.90E-05          | 7.90E-05             | 0.230761           | -4.33349                     | T down vs N                            | 27.583  | 20.1396   | 11.6825    | 1         |
| cg15473868                                                                              | MT1X                         | 1.82E-06          | 1.82E-06             | 0.266224           | -3.75623                     | T down vs N                            | 53.128  | 16.4042   | 4.94031    | 1         |
| cg15474337                                                                              | NAPSB                        | 0.00234548        | 0.00234548           | 0.202979           | -4.92663                     | T down vs N                            | 13.037  | 23.8174   | 29.2299    | 1         |
| cg15478981                                                                              | KIF6                         | 1.24E-07          | 1.24E-07             | 0.179484           | -5.57152                     | T down vs N                            | 80.293  | 27.6337   | 5.50659    | 1         |
| cg15479387                                                                              | LOC285830;LOC285830          | 0.00196183        | 0.00196183           | 0.265635           | -3.76456                     | T down vs N                            | 13.655  | 16.4591   | 19.2856    | 1         |
| cg15482893                                                                              | BSDC1;BSDC1;BSDC1;BSDC1      | 0.00034023        | 0.000340233          | 0.182908           | -5.46723                     | T down vs N                            | 20.54   | 27.0291   | 21.0552    | 1         |
| cg15484375                                                                              | SAA1;SAA1                    | 0.00014509        | 0.000145087          | 0.284599           | -3.51371                     | T down vs N                            | 24.492  | 14.7913   | 9.66279    | 1         |
| ANAPC13;ANAPC13;CEP63;CEP63;CEP63;ANAPC13;CEP63                                         |                              |                   |                      |                    |                              |                                        |         |           |            |           |
| cg15484384                                                                              |                              | 0.00025086        | 0.00025086           | 0.296424           | -3.37354                     | T down vs N                            | 21.904  | 13.8485   | 10.1159    | 1         |

| Probeset ID                                                                             | UCSC_REFGENE_NAME           | p-value<br>(Type) | p-value (T vs.<br>N) | Ratio (T<br>vs. N) | Fold-<br>Change (T<br>vs. N) | Fold-Change (T vs.<br>N) (Description) | F(Type) | SS (Type) | SS (Error) | F (Error) |
|-----------------------------------------------------------------------------------------|-----------------------------|-------------------|----------------------|--------------------|------------------------------|----------------------------------------|---------|-----------|------------|-----------|
| cg15484597                                                                              | CAMTA1                      | 0.00141742        | 0.00141742           | 0.30754            | -3.25161                     | T down vs N                            | 14.817  | 13.0226   | 14.0623    | 1         |
| cg15485247                                                                              | ABR;ABR;ABR                 | 0.00558187        | 0.00558187           | 0.315367           | -3.17091                     | T down vs N                            | 10.238  | 12.4735   | 19.4941    | 1         |
| cg15486123                                                                              | IVL                         | 2.24E-05          | 2.24E-05             | 0.149059           | -6.70875                     | T down vs N                            | 34.804  | 33.9334   | 15.6       | 1         |
| cg15488009                                                                              | FSTL3                       | 9.16E-06          | 9.16E-06             | 0.062828           | -15.9165                     | T down vs N                            | 40.677  | 71.7286   | 28.214     | 1         |
| cg15488722                                                                              | FREM2                       | 0.00355764        | 0.00355764           | 4.24323            | 4.24323                      | T up vs N                              | 11.652  | 19.5656   | 26.8672    | 1         |
| cg15488978                                                                              | C10orf41;C10orf41           | 5.02E-05          | 5.02E-05             | 11.6991            | 11.6991                      | T up vs N                              | 30.053  | 56.6578   | 30.1643    | 1         |
| cg15489294                                                                              | LVRN                        | 0.0037031         | 0.0037031            | 4.52591            | 4.52591                      | T up vs N                              | 11.522  | 21.3506   | 29.6474    | 1         |
| cg15490880                                                                              | PKLR;PKLR                   | 8.77E-06          | 8.77E-06             | 0.319796           | -3.127                       | T down vs N                            | 40.977  | 12.1738   | 4.75349    | 1         |
| cg15491134                                                                              | SLC8A1;SLC8A1;SLC8A1;SLC8A1 | 5.34E-05          | 5.34E-05             | 0.32762            | -3.05232                     | T down vs N                            | 29.711  | 11.6631   | 6.28073    | 1         |
| cg15495417                                                                              | FAM71A;FAM71A               | 0.00045563        | 0.00045563           | 0.221094           | -4.52295                     | T down vs N                            | 19.281  | 21.3322   | 17.7019    | 1         |
| cg15500466                                                                              | DDB2                        | 0.00018987        | 0.000189869          | 0.253721           | -3.94134                     | T down vs N                            | 23.198  | 17.6184   | 12.1517    | 1         |
| cg15500865                                                                              | PON3                        | 0.00071035        | 0.000710352          | 4.00256            | 4.00256                      | T up vs N                              | 17.456  | 18.0166   | 16.5136    | 1         |
| cg15503081                                                                              | DNASE2                      | 1.47E-05          | 1.47E-05             | 0.136191           | -7.34263                     | T down vs N                            | 37.494  | 37.2289   | 15.8868    | 1         |
| cg15505294                                                                              | RNASE11                     | 0.00015075        | 0.000150745          | 0.311313           | -3.2122                      | T down vs N                            | 24.305  | 12.7547   | 8.3964     | 1         |
| cg15507901                                                                              | CCDC54                      | 0.00239074        | 0.00239074           | 0.214411           | -4.66395                     | T down vs N                            | 12.972  | 22.2088   | 27.3928    | 1         |
| cg15510249                                                                              | MCF2L2;B3GNT5               | 0.00061092        | 0.000610921          | 0.282904           | -3.53477                     | T down vs N                            | 18.064  | 14.9323   | 13.2259    | 1         |
| cg15511286                                                                              | C13orf16                    | 6.85E-05          | 6.85E-05             | 0.176775           | -5.65692                     | T down vs N                            | 28.345  | 28.1254   | 15.8761    | 1         |
| EEF1B2;SNORD51;EEF1B2;SNORA41;E                                                         |                             |                   |                      |                    |                              |                                        |         |           |            |           |
| cg15515320                                                                              | EF1B2                       | 0.00136063        | 0.00136063           | 0.329505           | -3.03486                     | T down vs N                            | 14.967  | 11.5435   | 12.3403    | 1         |
| cg15518950                                                                              | TMEM171;TMEM171             | 0.00023657        | 0.000236566          | 3.1305             | 3.1305                       | T up vs N                              | 22.172  | 12.1977   | 8.80209    | 1         |
| cg15519237                                                                              | PRX;PRX                     | 1.30E-05          | 1.30E-05             | 0.210174           | -4.75796                     | T down vs N                            | 38.274  | 22.7882   | 9.5263     | 1         |
| cg15519474                                                                              | PRKCA                       | 3.42E-06          | 3.42E-06             | 0.227126           | -4.40284                     | T down vs N                            | 47.943  | 20.578    | 6.86747    | 1         |
| cg15521792                                                                              | NUDT17                      | 0.00050089        | 0.000500889          | 0.188493           | -5.30524                     | T down vs N                            | 18.883  | 26.0805   | 22.0982    | 1         |
| cg15523060                                                                              | MBD3L1                      | 2.44E-06          | 2.44E-06             | 0.21666            | -4.61553                     | T down vs N                            | 50.652  | 21.9088   | 6.92055    | 1         |
| cg15526535                                                                              | TNFRSF1B                    | 4.18E-06          | 4.18E-06             | 0.150289           | -6.65387                     | T down vs N                            | 46.394  | 33.6411   | 11.6018    | 1         |
| cg15526671                                                                              | TSPAN11                     | 3.44E-05          | 3.44E-05             | 0.25629            | -3.90183                     | T down vs N                            | 32.221  | 17.3605   | 8.62077    | 1         |
| cg15527168                                                                              | CALML6                      | 1.48E-05          | 1.48E-05             | 0.277523           | -3.60331                     | T down vs N                            | 37.463  | 15.39     | 6.57291    | 1         |
| cg15528722                                                                              | TTC33                       | 9.71E-08          | 9.71E-08             | 0.189348           | -5.28128                     | T down vs N                            | 83.213  | 25.9392   | 4.98752    | 1         |
| cg15531433                                                                              | ADARB2                      | 3.19E-05          | 3.19E-05             | 0.23042            | -4.3399                      | T down vs N                            | 32.665  | 20.1802   | 9.88483    | 1         |
| cg15532138                                                                              | CNTROB;CNTROB               | 1.48E-05          | 1.48E-05             | 0.265955           | -3.76004                     | T down vs N                            | 37.435  | 16.4293   | 7.02209    | 1         |
| NFATC1;NFATC1;NFATC1;NFATC1;NFA                                                         |                             |                   |                      |                    |                              |                                        |         |           |            |           |
| cg15532942                                                                              | TC1                         | 4.28E-05          | 4.28E-05             | 0.236582           | -4.22687                     | T down vs N                            | 30.949  | 19.4611   | 10.0609    | 1         |
| cg15536446                                                                              | INTS4                       | 1.25E-05          | 1.25E-05             | 0.232535           | -4.30042                     | T down vs N                            | 38.561  | 19.9297   | 8.26941    | 1         |
| cg15538103                                                                              | C14orf145                   | 8.79E-05          | 8.79E-05             | 0.266161           | -3.75712                     | T down vs N                            | 27.025  | 16.41     | 9.71566    | 1         |
| cg15541630                                                                              | PSKH2                       | 6.67E-05          | 6.67E-05             | 7.22591            | 7.22591                      | T up vs N                              | 28.489  | 36.6328   | 20.5738    | 1         |
| cg15542670                                                                              | TEAD1                       | 1.93E-05          | 1.93E-05             | 0.245191           | -4.07845                     | T down vs N                            | 35.736  | 18.5079   | 8.28647    | 1         |
| cg15543523                                                                              | ESR1;ESR1;ESR1;ESR1         | 8.35E-06          | 8.35E-06             | 0.175768           | -5.68931                     | T down vs N                            | 41.319  | 28.311    | 10.9629    | 1         |
| cg15544036                                                                              | CLDN4                       | 0.00081064        | 0.00081064           | 3.4202             | 3.4202                       | T up vs N                              | 16.933  | 14.1631   | 13.3825    | 1         |
| cg15545772                                                                              | TDRD5;TDRD5                 | 0.00616895        | 0.00616895           | 10.9433            | 10.9433                      | T up vs N                              | 9.9353  | 53.6226   | 86.3553    | 1         |
| cg15545842                                                                              | KRT35                       | 0.00178883        | 0.00178883           | 0.267946           | -3.73209                     | T down vs N                            | 13.98   | 16.2447   | 18.5918    | 1         |
| cg15547734                                                                              | HCN1                        | 0.000101          | 0.000101003          | 0.156436           | -6.3924                      | T down vs N                            | 26.306  | 32.233    | 19.6052    | 1         |
| cg15548427                                                                              | MFSD1;MFSD1                 | 1.98E-08          | 1.98E-08             | 0.147841           | -6.76402                     | T down vs N                            | 104.79  | 34.2266   | 5.22595    | 1         |
| cg15548613                                                                              | MAFF;MAFF;MAFF;MAFF         | 0.00059967        | 0.000599666          | 4.55861            | 4.55861                      | T up vs N                              | 18.14   | 21.5548   | 19.0118    | 1         |
| cg15551687                                                                              | MYO7B                       | 0.00268178        | 0.00268178           | 0.140081           | -7.13874                     | T down vs N                            | 12.583  | 36.1846   | 46.0096    | 1         |
| cg15553770                                                                              | UBQLN3                      | 0.00170543        | 0.00170543           | 0.26605            | -3.7587                      | T down vs N                            | 14.15   | 16.4205   | 18.5676    | 1         |
| cg15553852                                                                              | CRP                         | 7.73E-06          | 7.73E-06             | 0.143129           | -6.98672                     | T down vs N                            | 41.866  | 35.3964   | 13.5276    | 1         |
| cg15554214                                                                              | PSG5;PSG5                   | 0.00010117        | 0.000101171          | 0.303769           | -3.29197                     | T down vs N                            | 26.297  | 13.2966   | 8.09004    | 1         |
| cg15555932                                                                              | AP1M2;AP1M2                 | 0.00493557        | 0.00493557           | 3.83255            | 3.83255                      | T up vs N                              | 10.616  | 16.9066   | 25.4819    | 1         |
| cg15555956                                                                              | PCDHB18                     | 0.00472717        | 0.00472717           | 0.287368           | -3.47986                     | T down vs N                            | 10.75   | 14.5643   | 21.678     | 1         |
| TGIF1;TGIF1;TGIF1;TGIF1;TGIF1;TGIF1;                                                    |                             |                   |                      |                    |                              |                                        |         |           |            |           |
| cg15555970                                                                              | TGIF1;TGIF1                 | 0.00024966        | 0.000249656          | 0.179645           | -5.56655                     | T down vs N                            | 21.926  | 27.605    | 20.1445    | 1         |
| cg15556672                                                                              | MRPS36                      | 2.86E-06          | 2.86E-06             | 0.200249           | -4.99377                     | T down vs N                            | 49.358  | 24.2235   | 7.85236    | 1         |
| cg15556886                                                                              | PRDM8;PRDM8                 | 1.89E-05          | 1.89E-05             | 14.0024            | 14.0024                      | T up vs N                              | 35.887  | 65.2403   | 29.0871    | 1         |
| cg15558558                                                                              | WHAMM                       | 0.00014018        | 0.000140179          | 0.320738           | -3.11781                     | T down vs N                            | 24.661  | 12.1111   | 7.85772    | 1         |
| cg15561501                                                                              | PLEKHF1                     | 0.00193483        | 0.00193483           | 0.194489           | -5.14169                     | T down vs N                            | 13.704  | 25.1108   | 29.3188    | 1         |
| cg15561613                                                                              | KIF26B                      | 4.90E-05          | 4.90E-05             | 8.17182            | 8.17182                      | T up vs N                              | 30.191  | 41.332    | 21.9045    | 1         |
| cg15562212                                                                              | LOC220429                   | 8.94E-05          | 8.94E-05             | 0.332036           | -3.01173                     | T down vs N                            | 26.937  | 11.3849   | 6.76252    | 1         |
| cg15568107                                                                              | GLYAT                       | 6.17E-05          | 6.17E-05             | 0.262947           | -3.80304                     | T down vs N                            | 28.914  | 16.7127   | 9.24814    | 1         |
| cg15570148                                                                              | FHIT;FHIT                   | 0.00345791        | 0.00345791           | 3.72445            | 3.72445                      | T up vs N                              | 11.744  | 16.1942   | 22.0632    | 1         |
| cg15571405                                                                              | MKLN1                       | 0.00088329        | 0.000883294          | 0.296792           | -3.36936                     | T down vs N                            | 16.598  | 13.8203   | 13.3222    | 1         |
| cg15572489                                                                              | PTPRN2;PTPRN2;PTPRN2        | 6.17E-06          | 6.17E-06             | 0.22079            | -4.52919                     | T down vs N                            | 43.483  | 21.3711   | 7.86367    | 1         |
| cg15574321                                                                              | WNT11                       | 0.00024595        | 0.000245949          | 0.308022           | -3.24653                     | T down vs N                            | 21.994  | 12.9881   | 9.44849    | 1         |
| cg15575433                                                                              | UFSP1;ACHE;ACHE             | 0.00029341        | 0.000293409          | 3.0405             | 3.0405                       | T up vs N                              | 21.196  | 11.5821   | 8.743      | 1         |
| cg15575880                                                                              | HLA-DPA1                    | 0.00044695        | 0.000446954          | 0.189539           | -5.27596                     | T down vs N                            | 19.363  | 25.9078   | 21.4084    | 1         |
| cg15576517                                                                              | STXBP2;STXBP2               | 0.00098492        | 0.000984924          | 0.303146           | -3.29874                     | T down vs N                            | 16.178  | 13.3424   | 13.1954    | 1         |
| cg15576730                                                                              | SYT5;PTPRH;PTPRH            | 0.00057741        | 0.000577412          | 0.184557           | -5.41837                     | T down vs N                            | 18.295  | 26.7442   | 23.3895    | 1         |
| cg15577272                                                                              | PTPRN2;PTPRN2;PTPRN2        | 0.00254623        | 0.00254623           | 0.302144           | -3.30968                     | T down vs N                            | 12.758  | 13.4166   | 16.8258    | 1         |
| cg15579926                                                                              | LOC200726                   | 0.00111383        | 0.00111383           | 0.286172           | -3.49441                     | T down vs N                            | 15.711  | 14.6619   | 14.9314    | 1         |
| MIR941-3;MIR941-3;MIR941-2;MIR941-1;MIR941-3;MIR941-3;MIR941-2;DNAJC5;MIR941-2;MIR941-1 |                             |                   |                      |                    |                              |                                        |         |           |            |           |
| cg15580304                                                                              |                             | 3.00E-05          | 3.00E-05             | 5.106              | 5.106                        | T up vs N                              | 33.033  | 24.8976   | 12.0596    | 1         |

| Probeset ID                   | UCSC_REFGENE_NAME           | p-value<br>(Type) | p-value (T vs.<br>N) | Ratio (T<br>vs. N) | Fold-<br>Change (T<br>vs. N) | Fold-Change (T vs.<br>N) (Description) | F(Type) | SS (Type) | SS (Error) | F (Error) |
|-------------------------------|-----------------------------|-------------------|----------------------|--------------------|------------------------------|----------------------------------------|---------|-----------|------------|-----------|
| cg15581070                    | FANK1                       | 4.07E-05          | 4.07E-05             | 0.297005           | -3.36694                     | T down vs N                            | 31.235  | 13.8039   | 7.07095    | 1         |
| cg15582891                    | TAAR1                       | 7.08E-05          | 7.08E-05             | 0.298819           | -3.34651                     | T down vs N                            | 28.167  | 13.6659   | 7.76283    | 1         |
| cg15583072                    | SLCO1A2;IAPP                | 4.67E-05          | 4.67E-05             | 0.318383           | -3.14087                     | T down vs N                            | 30.452  | 12.2686   | 6.44604    | 1         |
| cg15584790                    | HLA-F;HLA-F;HLA-F           | 0.00030199        | 0.000301988          | 3.60034            | 3.60034                      | T up vs N                              | 21.067  | 15.3702   | 11.6733    | 1         |
| cg15586563                    | TEX101                      | 0.00069309        | 0.000693088          | 0.22765            | -4.39271                     | T down vs N                            | 17.555  | 20.5141   | 18.6974    | 1         |
| cg15586998                    | NXT2;NXT2                   | 0.00023334        | 0.000233341          | 0.221512           | -4.51443                     | T down vs N                            | 22.236  | 21.2789   | 15.3116    | 1         |
| cg15590780                    | USH2A;USH2A;USH2A;USH2A     | 0.00026537        | 0.00026537           | 0.30839            | -3.24264                     | T down vs N                            | 21.648  | 12.9618   | 9.58003    | 1         |
| cg15591386                    | MSH4                        | 1.40E-05          | 1.40E-05             | 0.288525           | -3.46591                     | T down vs N                            | 37.798  | 14.4706   | 6.12548    | 1         |
| cg15593510                    | OR10T2                      | 5.99E-07          | 5.99E-07             | 0.15048            | -6.64539                     | T down vs N                            | 63.245  | 33.5959   | 8.49929    | 1         |
| cg15597984                    | CYP2D6;CYP2D6               | 0.00014103        | 0.000141034          | 0.321275           | -3.11259                     | T down vs N                            | 24.631  | 12.0754   | 7.84412    | 1         |
| cg15600176                    | LAMB1                       | 0.00050878        | 0.000508782          | 0.315108           | -3.17352                     | T down vs N                            | 18.818  | 12.4913   | 10.6206    | 1         |
| cg15601682                    | CCDC40                      | 0.00202332        | 0.00202332           | 0.247587           | -4.03899                     | T down vs N                            | 13.547  | 18.2528   | 21.5574    | 1         |
| cg15602298                    | FCRL3                       | 0.0047564         | 0.0047564            | 0.312088           | -3.20423                     | T down vs N                            | 10.73   | 12.7005   | 18.9376    | 1         |
| cg15602677                    | SNTG2                       | 2.03E-05          | 2.03E-05             | 0.144119           | -6.93873                     | T down vs N                            | 35.407  | 35.1458   | 15.8821    | 1         |
| cg15603896                    | TFR2                        | 0.00193151        | 0.00193151           | 3.17518            | 3.17518                      | T up vs N                              | 13.71   | 12.5026   | 14.5913    | 1         |
| cg15605096                    | TAS1R2                      | 1.60E-05          | 1.60E-05             | 0.194143           | -5.15085                     | T down vs N                            | 36.949  | 25.1655   | 10.8973    | 1         |
| cg15608277                    | KRT3                        | 2.24E-05          | 2.24E-05             | 15.3681            | 15.3681                      | T up vs N                              | 34.8    | 69.9225   | 32.1486    | 1         |
| cg15610202                    | C19orf30                    | 0.0019998         | 0.0019998            | 0.209479           | -4.77375                     | T down vs N                            | 13.588  | 22.8851   | 26.9472    | 1         |
| cg15610437                    | AZU1                        | 1.43E-06          | 1.43E-06             | 0.331796           | -3.0139                      | T down vs N                            | 55.172  | 11.3998   | 3.30594    | 1         |
| cg15611112                    | CAPN11                      | 2.31E-06          | 2.31E-06             | 0.209216           | -4.77975                     | T down vs N                            | 51.097  | 22.9219   | 7.17757    | 1         |
| cg15611336                    | RPP25                       | 0.0037326         | 0.0037326            | 13.0708            | 13.0708                      | T up vs N                              | 11.497  | 61.8807   | 86.1179    | 1         |
| cg15611417                    | GJB6;GJB6;GJB6;GJB6         | 0.00217023        | 0.00217023           | 0.320258           | -3.12248                     | T down vs N                            | 13.304  | 12.143    | 14.6036    | 1         |
| cg15611912                    | RGS10                       | 0.00043142        | 0.000431423          | 0.32583            | -3.06908                     | T down vs N                            | 19.513  | 11.7779   | 9.65746    | 1         |
| cg15616006                    | MIR518C                     | 0.00249303        | 0.00249303           | 0.311078           | -3.21463                     | T down vs N                            | 12.83   | 12.7712   | 15.9272    | 1         |
| cg15618978                    | TRIM59                      | 9.24E-06          | 9.24E-06             | 16.1958            | 16.1958                      | T up vs N                              | 40.617  | 72.6331   | 28.6122    | 1         |
| cg15621458                    | NEDD1;NEDD1;NEDD1;NEDD1     | 7.94E-06          | 7.94E-06             | 0.102087           | -9.79557                     | T down vs N                            | 41.678  | 48.7715   | 18.7231    | 1         |
| cg15623425                    | MTMR9L                      | 6.75E-05          | 6.75E-05             | 0.278585           | -3.58956                     | T down vs N                            | 28.425  | 15.2983   | 8.61119    | 1         |
| cg15623444                    | NHEDC1;NHEDC1               | 3.87E-06          | 3.87E-06             | 0.212789           | -4.69949                     | T down vs N                            | 46.994  | 22.4283   | 7.63623    | 1         |
| cg15626629                    | GJB1;BCYRN1;GJB1            | 0.00117576        | 0.00117576           | 0.193382           | -5.17112                     | T down vs N                            | 15.508  | 25.2862   | 26.0884    | 1         |
| cg15628917                    | C1orf87                     | 2.35E-05          | 2.35E-05             | 10.1791            | 10.1791                      | T up vs N                              | 34.512  | 50.4271   | 23.3786    | 1         |
| cg15633390                    | EIF4E;EIF4E;EIF4E;EIF4E     | 6.67E-05          | 6.67E-05             | 0.11949            | -8.3689                      | T down vs N                            | 28.488  | 42.2751   | 23.7434    | 1         |
| cg15634877                    | SPEG                        | 0.00046581        | 0.000465814          | 5.30599            | 5.30599                      | T up vs N                              | 19.188  | 26.0849   | 21.751     | 1         |
| cg15635392                    | HLA-DRA                     | 0.00090825        | 0.000908249          | 0.301026           | -3.32197                     | T down vs N                            | 16.49   | 13.4998   | 13.0985    | 1         |
| cg15636519                    | STAT4                       | 1.40E-05          | 1.40E-05             | 0.209694           | -4.76885                     | T down vs N                            | 37.818  | 22.855    | 9.6696     | 1         |
| cg15638292                    | MYO7A;MYO7A;MYO7A           | 0.00021089        | 0.000210892          | 3.16716            | 3.16716                      | T up vs N                              | 22.705  | 12.4479   | 8.77211    | 1         |
| cg15640140                    | RPL18AP3;SNORA68;RPL18A     | 7.91E-05          | 7.91E-05             | 0.140592           | -7.11278                     | T down vs N                            | 27.579  | 36.0506   | 20.915     | 1         |
| cg15640243                    | GPM6A;GPM6A                 | 0.00023509        | 0.000235093          | 0.292219           | -3.42209                     | T down vs N                            | 22.201  | 14.1759   | 10.2163    | 1         |
| cg15641364                    | TAGLN2                      | 0.00013739        | 0.000137388          | 0.210802           | -4.74378                     | T down vs N                            | 24.76   | 22.7011   | 14.6697    | 1         |
| cg15641463                    | TRIM10;TRIM10               | 0.00017767        | 0.000177665          | 0.298537           | -3.34967                     | T down vs N                            | 23.513  | 13.6872   | 9.31368    | 1         |
| cg15645660                    | TTC22                       | 0.00374648        | 0.00374648           | 9.17858            | 9.17858                      | T up vs N                              | 11.485  | 46.0302   | 64.1257    | 1         |
| cg15645888                    | FBXO16                      | 1.51E-05          | 1.51E-05             | 0.236272           | -4.23241                     | T down vs N                            | 37.308  | 19.4965   | 8.36134    | 1         |
| cg15646123                    | CDKAL1                      | 0.00016001        | 0.000160014          | 0.294051           | -3.40077                     | T down vs N                            | 24.016  | 14.0322   | 9.34867    | 1         |
| cg15648345                    | MKS1;MKS1                   | 0.00057324        | 0.000573238          | 0.27319            | -3.66045                     | T down vs N                            | 18.325  | 15.7701   | 13.7695    | 1         |
| cg15649011                    | WDR87                       | 7.79E-06          | 7.79E-06             | 0.296047           | -3.37784                     | T down vs N                            | 41.808  | 13.8775   | 5.31102    | 1         |
| cg15651204                    | KLK12;KLK12;KLK12           | 0.00213367        | 0.00213367           | 0.228523           | -4.37593                     | T down vs N                            | 13.363  | 20.4082   | 24.4357    | 1         |
| cg15651758                    | CSN3;CSN3                   | 0.00095328        | 0.000953281          | 0.271776           | -3.67951                     | T down vs N                            | 16.304  | 15.8965   | 15.6006    | 1         |
| cg15652303                    | KLK12;KLK12;KLK12           | 0.0013606         | 0.0013606            | 0.27661            | -3.61519                     | T down vs N                            | 14.967  | 15.4691   | 16.5369    | 1         |
| cg15655935                    | PLACL1                      | 3.47E-05          | 3.47E-05             | 0.190777           | -5.24173                     | T down vs N                            | 32.163  | 25.7054   | 12.7877    | 1         |
| cg15656087                    | CDH4                        | 0.00016654        | 0.000166535          | 0.281858           | -3.54788                     | T down vs N                            | 23.823  | 15.02     | 10.0877    | 1         |
| cg15657390                    | FAM82A1;FAM82A1             | 0.00026102        | 0.000261024          | 0.278017           | -3.5969                      | T down vs N                            | 21.723  | 15.3473   | 11.304     | 1         |
| cg15657888                    | IL1F9;IL1F9                 | 0.00016441        | 0.000164411          | 0.326092           | -3.06662                     | T down vs N                            | 23.885  | 11.761    | 7.87846    | 1         |
| cg15659974                    | SLC6A14                     | 0.00020717        | 0.00020717           | 0.328194           | -3.04698                     | T down vs N                            | 22.788  | 11.6265   | 8.16335    | 1         |
| cg15661415                    | SEC61G;SEC61G               | 6.09E-05          | 6.09E-05             | 0.233218           | -4.28782                     | T down vs N                            | 28.983  | 19.8496   | 10.9581    | 1         |
| cg15663823                    | SDCCAG10                    | 0.00129176        | 0.00129176           | 0.247933           | -4.03335                     | T down vs N                            | 15.158  | 18.2163   | 19.228     | 1         |
| cg15664152                    | AHCYL2;AHCYL2;AHCYL2;AHCYL2 | 0.00095289        | 0.000952886          | 0.292527           | -3.41849                     | T down vs N                            | 16.305  | 14.1516   | 13.8868    | 1         |
| cg15664442                    | AGXT2                       | 0.00214954        | 0.00214954           | 0.283553           | -3.52668                     | T down vs N                            | 13.337  | 14.8781   | 17.8485    | 1         |
| cg15668691                    | KCND2                       | 0.00368211        | 0.00368211           | 0.231467           | -4.32027                     | T down vs N                            | 11.541  | 20.0558   | 27.8052    | 1         |
| cg15669228                    | IFNA8                       | 0.00124469        | 0.00124469           | 0.308703           | -3.23936                     | T down vs N                            | 15.296  | 12.9394   | 13.5353    | 1         |
| cg15671083                    | UCN3                        | 1.28E-05          | 1.28E-05             | 0.295253           | -3.38693                     | T down vs N                            | 38.381  | 13.9388   | 5.81072    | 1         |
| cg15672749                    | MKS1;MKS1                   | 2.05E-05          | 2.05E-05             | 0.076566           | -13.0606                     | T down vs N                            | 35.366  | 61.8433   | 27.9787    | 1         |
| PCDHGA4;PCDHGA2;PCDHGB2;PCDHG |                             |                   |                      |                    |                              |                                        |         |           |            |           |
| cg15672768                    | A1;PCDHGB1;PCDHGA3;PCDHGB2  | 0.00013792        | 0.000137923          | 8.13785            | 8.13785                      | T up vs N                              | 24.741  | 41.1682   | 26.624     | 1         |
| cg15673034                    | DLGAP1;DLGAP1               | 0.00379327        | 0.00379327           | 6.03128            | 6.03128                      | T up vs N                              | 11.445  | 30.2439   | 42.2801    | 1         |
| cg15675198                    | VAMP4                       | 0.00015783        | 0.000157832          | 0.271196           | -3.68736                     | T down vs N                            | 24.082  | 15.9487   | 10.5962    | 1         |
| cg15676677                    | MCC;MCC                     | 7.74E-05          | 7.74E-05             | 0.234085           | -4.27195                     | T down vs N                            | 27.694  | 19.7486   | 11.4098    | 1         |
| cg15680020                    | DIDO1;DIDO1;DIDO1           | 5.20E-06          | 5.20E-06             | 3.12651            | 3.12651                      | T up vs N                              | 44.751  | 12.1705   | 4.35138    | 1         |
| cg15681326                    | NCEH1;NCEH1;NCEH1;NCEH1     | 4.63E-07          | 4.63E-07             | 0.279655           | -3.57583                     | T down vs N                            | 65.801  | 15.2067   | 3.69763    | 1         |
| cg15684329                    | EXT1                        | 1.23E-05          | 1.23E-05             | 3.20139            | 3.20139                      | T up vs N                              | 38.665  | 12.6811   | 5.24765    | 1         |
| cg15684702                    | PTCH2;PTCH2                 | 0.00013578        | 0.00013578           | 0.212937           | -4.69623                     | T down vs N                            | 24.818  | 22.4083   | 14.4466    | 1         |
| cg15686608                    | DAB2IP                      | 0.0001031         | 0.000103102          | 0.290313           | -3.44456                     | T down vs N                            | 26.2    | 14.3271   | 8.74923    | 1         |
| cg15691862                    | FOXD2;FOXD2                 | 0.0003155         | 0.000315499          | 0.229946           | -4.34885                     | T down vs N                            | 20.873  | 20.2369   | 15.5127    | 1         |

| Probeset ID                         | UCSC_REFGENE_NAME          | p-value<br>(Type) | p-value (T vs.<br>N) | Ratio (T<br>vs. N) | Fold-<br>Change (T<br>vs. N) | Fold-Change (T vs.<br>N) (Description) | F(Type) | SS (Type) | SS (Error) | F (Error) |
|-------------------------------------|----------------------------|-------------------|----------------------|--------------------|------------------------------|----------------------------------------|---------|-----------|------------|-----------|
| cg15693066                          | RHOD                       | 1.42E-05          | 1.42E-05             | 7.74459            | 7.74459                      | T up vs N                              | 37.738  | 39.246    | 16.6394    | 1         |
| cg15693299                          | LOC360030                  | 0.00058021        | 0.000580212          | 0.298855           | -3.3461                      | T down vs N                            | 18.275  | 13.6631   | 11.9622    | 1         |
| cg15696058                          | FGFBP2                     | 9.96E-07          | 9.96E-07             | 0.313345           | -3.19137                     | T down vs N                            | 58.428  | 12.6129   | 3.45397    | 1         |
| cg15696816                          | RAI1                       | 0.00362339        | 0.00362339           | 3.33368            | 3.33368                      | T up vs N                              | 11.593  | 13.5791   | 18.7418    | 1         |
| cg15696973                          | MGC13005;MGC13005          | 2.74E-07          | 2.74E-07             | 0.247026           | -4.04815                     | T down vs N                            | 71.287  | 18.3121   | 4.11006    | 1         |
| cg15698299                          | ALAS1;ALAS1                | 0.00040778        | 0.000407775          | 0.283866           | -3.52279                     | T down vs N                            | 19.754  | 14.8521   | 12.0297    | 1         |
| cg15698945                          | TAAR9                      | 6.26E-05          | 6.26E-05             | 0.250669           | -3.98933                     | T down vs N                            | 28.832  | 17.9307   | 9.95033    | 1         |
| cg15700197                          | OR10J1                     | 6.71E-06          | 6.71E-06             | 0.120387           | -8.30654                     | T down vs N                            | 42.876  | 41.9779   | 15.6648    | 1         |
| cg15701085                          | ANKRD24                    | 0.00046218        | 0.000462177          | 0.318931           | -3.13547                     | T down vs N                            | 19.221  | 12.2317   | 10.1819    | 1         |
| cg15701111                          | KRT81                      | 2.30E-05          | 2.30E-05             | 3.07479            | 3.07479                      | T up vs N                              | 34.641  | 11.8169   | 5.45805    | 1         |
| cg15703035                          | C13orf29                   | 9.17E-06          | 9.17E-06             | 0.283513           | -3.52718                     | T down vs N                            | 40.664  | 14.8815   | 5.85534    | 1         |
| cg15703221                          | PLA2R1;PLA2R1              | 0.00030001        | 0.000300009          | 10.2788            | 10.2788                      | T up vs N                              | 21.096  | 50.8517   | 38.5671    | 1         |
| cg15703636                          | COL21A1                    | 0.00043492        | 0.000434924          | 10.8742            | 10.8742                      | T up vs N                              | 19.479  | 53.3389   | 43.8134    | 1         |
| cg15706040                          | MDH1B                      | 2.25E-05          | 2.25E-05             | 0.254836           | -3.9241                      | T down vs N                            | 34.781  | 17.5059   | 8.053      | 1         |
| cg15706223                          | TNFRSF18;TNFRSF18;TNFRSF18 | 0.00010013        | 0.000100131          | 4.27423            | 4.27423                      | T up vs N                              | 26.35   | 19.7632   | 12.0003    | 1         |
| cg15707978                          | NBR1;NBR1;NBR1             | 7.70E-05          | 7.70E-05             | 0.134697           | -3.17766                     | T down vs N                            | 27.722  | 12.5195   | 7.22576    | 1         |
| cg15708127                          | CNIH3                      | 0.00028694        | 0.000286943          | 0.205209           | -4.87307                     | T down vs N                            | 21.296  | 23.4921   | 17.6503    | 1         |
| cg15708776                          | PKLR;PKLR                  | 9.17E-06          | 9.17E-06             | 0.268207           | -3.72846                     | T down vs N                            | 40.67   | 16.2207   | 6.38146    | 1         |
| cg15711616                          | ENPEP                      | 0.0001837         | 0.000183703          | 0.318242           | -3.14227                     | T down vs N                            | 23.354  | 12.2781   | 8.4117     | 1         |
| cg15711744                          | ANP3D2                     | 4.17E-06          | 4.17E-06             | 0.171584           | -5.82804                     | T down vs N                            | 46.42   | 29.1011   | 10.0306    | 1         |
| cg15712226                          | SNRPF                      | 0.0003587         | 0.000358697          | 3.54755            | 3.54755                      | T up vs N                              | 20.308  | 15.0178   | 11.8318    | 1         |
| cg15712304                          | PKNOX2                     | 0.00125602        | 0.00125602           | 0.274324           | -3.64532                     | T down vs N                            | 15.687  | 14.7478   | 14.1023    | 1         |
| cg15714682                          | LOC730755                  | 2.11E-06          | 2.11E-06             | 0.247642           | -4.03808                     | T down vs N                            | 51.85   | 18.2469   | 5.63066    | 1         |
| cg15714846                          | FZD5                       | 0.0004262         | 0.000426201          | 4.78442            | 4.78442                      | T up vs N                              | 19.565  | 22.9505   | 18.7688    | 1         |
| cg15715507                          | DND1;HARS                  | 0.00269193        | 0.00269193           | 0.254055           | -3.93615                     | T down vs N                            | 12.571  | 17.5846   | 22.3818    | 1         |
| cg15716373                          | APOL1;APOL1;APOL1;APOL1    | 0.00032438        | 0.000324382          | 0.254769           | -3.92512                     | T down vs N                            | 20.75   | 17.5126   | 13.5039    | 1         |
| cg15716680                          | TEAD1                      | 0.0001644         | 0.000164396          | 0.321225           | -3.11309                     | T down vs N                            | 23.885  | 12.0788   | 8.09119    | 1         |
| cg15717887                          | OR6C1                      | 0.00032034        | 0.000320337          | 0.234127           | -4.27119                     | T down vs N                            | 20.805  | 19.7438   | 15.1838    | 1         |
| cg15717907                          | ORSI1                      | 8.26E-07          | 8.26E-07             | 0.230838           | -4.33204                     | T down vs N                            | 60.169  | 20.1304   | 5.35307    | 1         |
| cg15718572                          | CR1L                       | 4.24E-05          | 4.24E-05             | 0.327461           | -3.0538                      | T down vs N                            | 31.011  | 11.6732   | 6.02271    | 1         |
| cg15719043                          | TMEM9                      | 0.00100824        | 0.00100824           | 0.299089           | -3.34349                     | T down vs N                            | 16.089  | 13.6454   | 13.5701    | 1         |
| cg15719255                          | LRRC25                     | 0.00358528        | 0.00358528           | 0.308303           | -3.24357                     | T down vs N                            | 11.627  | 12.968    | 17.8458    | 1         |
| cg15719599                          | ZAP70                      | 0.00062806        | 0.00062806           | 0.326966           | -3.05842                     | T down vs N                            | 17.952  | 11.7048   | 10.4322    | 1         |
| cg15721102                          | FAM178B                    | 0.00028593        | 0.000285927          | 0.248821           | -4.01895                     | T down vs N                            | 21.312  | 18.123    | 13.6062    | 1         |
| cg15721562                          | ZNF551                     | 2.18E-05          | 2.18E-05             | 0.160123           | -6.24519                     | T down vs N                            | 34.964  | 31.4285   | 14.3823    | 1         |
| SIRPG;SIRPG;SIRPG;SIRPG;SIRPG;SIRPG |                            |                   |                      |                    |                              |                                        |         |           |            |           |
| cg15722679                          | G                          | 7.63E-07          | 7.63E-07             | 0.15125            | -6.61158                     | T down vs N                            | 60.911  | 33.4152   | 8.77747    | 1         |
| cg15726040                          | DPP10                      | 7.67E-05          | 7.67E-05             | 0.315251           | -3.17208                     | T down vs N                            | 27.738  | 12.4814   | 7.19956    | 1         |
| cg15726045                          | PLOD2;PLOD2                | 0.00037692        | 0.000376915          | 0.294208           | -3.39895                     | T down vs N                            | 20.093  | 14.0199   | 11.164     | 1         |
| cg15727583                          | MF12;MF12                  | 0.00115427        | 0.00115427           | 3.05958            | 3.05958                      | T up vs N                              | 15.577  | 11.7128   | 12.0307    | 1         |
| cg15727925                          | ZNF266;ZNF266              | 0.00010379        | 0.000103793          | 0.269912           | -3.70491                     | T down vs N                            | 26.166  | 16.0649   | 9.82324    | 1         |
| cg15732840                          | LOC100132215               | 0.00016041        | 0.000160408          | 15.6253            | 15.6253                      | T up vs N                              | 24.004  | 70.7744   | 47.1755    | 1         |
| cg15733827                          | VPS52                      | 0.00021671        | 0.000216709          | 0.303509           | -3.29479                     | T down vs N                            | 22.578  | 13.3157   | 9.43631    | 1         |
| cg15735240                          | MRPS18B;PPP1R10            | 0.0012275         | 0.0012275            | 0.267288           | -3.74128                     | T down vs N                            | 15.347  | 16.3054   | 16.9988    | 1         |
| cg15735736                          | TGFB1                      | 0.00010275        | 0.000102754          | 0.20919            | -4.78033                     | T down vs N                            | 26.218  | 22.9255   | 13.9908    | 1         |
| cg15736994                          | ACCN5                      | 0.00033259        | 0.000332594          | 3.51654            | 3.51654                      | T up vs N                              | 20.639  | 14.8102   | 11.4811    | 1         |
| cg15737123                          | HLA-DPB2                   | 0.00123398        | 0.00123398           | 0.205544           | -4.86514                     | T down vs N                            | 15.328  | 23.4438   | 24.472     | 1         |
| cg15740507                          | TBC1D23                    | 5.32E-05          | 5.32E-05             | 0.265066           | -3.77264                     | T down vs N                            | 29.733  | 16.5124   | 8.88581    | 1         |
| cg15741124                          | CYB5D2;CYB5D2;CYB5D2       | 3.87E-05          | 3.87E-05             | 0.326186           | -3.06574                     | T down vs N                            | 31.539  | 11.755    | 5.96338    | 1         |
| cg15741433                          | HIST1H1A                   | 0.00015581        | 0.000155809          | 6.72394            | 6.72394                      | T up vs N                              | 24.145  | 34.0141   | 22.5403    | 1         |
| cg15741930                          | C20orf165                  | 0.00012026        | 0.000120262          | 0.287531           | -3.47789                     | T down vs N                            | 25.421  | 14.551    | 9.15832    | 1         |
| cg15742758                          | ASB18                      | 0.00459773        | 0.00459773           | 0.331954           | -3.01246                     | T down vs N                            | 10.836  | 11.39     | 16.8177    | 1         |
| cg15743533                          | FAM110A;FAM110A            | 0.00071683        | 0.000716826          | 0.318234           | -3.14234                     | T down vs N                            | 17.42   | 12.2786   | 11.2777    | 1         |
| cg15744333                          | BTNL2                      | 0.00020526        | 0.000205264          | 0.252967           | -3.95308                     | T down vs N                            | 22.831  | 17.6949   | 12.4006    | 1         |
| cg15745273                          | BYSL                       | 0.00012032        | 0.000120317          | 0.2766             | -3.61533                     | T down vs N                            | 25.419  | 15.4701   | 9.73764    | 1         |
| cg15747933                          | NMI                        | 0.00118727        | 0.00118727           | 0.267396           | -3.73978                     | T down vs N                            | 15.472  | 16.2955   | 16.8521    | 1         |
| cg15760474                          | FOXP4;FOXP4;FOXP4          | 3.83E-05          | 3.83E-05             | 4.03788            | 4.03788                      | T up vs N                              | 31.59   | 18.2456   | 9.24129    | 1         |
| cg15760709                          | MAD1L1;MAD1L1;MAD1L1       | 0.00080696        | 0.000806956          | 0.132698           | -7.53589                     | T down vs N                            | 16.951  | 38.2055   | 36.0616    | 1         |
| cg15761405                          | FCRL2                      | 2.58E-06          | 2.58E-06             | 0.129106           | -7.74559                     | T down vs N                            | 50.207  | 39.2509   | 12.5086    | 1         |
| cg15765380                          | SIAH2                      | 3.08E-05          | 3.08E-05             | 0.31329            | -3.19193                     | T down vs N                            | 32.882  | 12.6167   | 6.13918    | 1         |
| cg15767218                          | ANO1;ANO1                  | 0.00211584        | 0.00211584           | 0.326875           | -3.05928                     | T down vs N                            | 13.392  | 11.7107   | 13.9914    | 1         |
| cg15772924                          | HOXC4;HOXC5;HOXC6          | 2.27E-05          | 2.27E-05             | 0.324675           | -3.08                        | T down vs N                            | 34.722  | 11.8526   | 5.46167    | 1         |
| cg15773251                          | TNXB                       | 0.00436987        | 0.00436987           | 0.285844           | -3.49841                     | T down vs N                            | 10.996  | 14.6887   | 21.374     | 1         |
| cg15773261                          | GPR133                     | 3.77E-05          | 3.77E-05             | 5.71225            | 5.71225                      | T up vs N                              | 31.685  | 28.4422   | 14.3625    | 1         |
| cg15773338                          | LOC440895;LIMS3-LOC440895  | 5.67E-05          | 5.67E-05             | 0.259505           | -3.85349                     | T down vs N                            | 29.372  | 17.044    | 9.28441    | 1         |
| cg15773925                          | CTNNA3;CTNNA3              | 2.34E-05          | 2.34E-05             | 0.30214            | -3.30972                     | T down vs N                            | 34.531  | 13.4169   | 6.21675    | 1         |
| cg15774391                          | STAT5A;STAT5A              | 8.04E-06          | 8.04E-06             | 0.28739            | -3.47959                     | T down vs N                            | 41.584  | 14.5625   | 5.60318    | 1         |
| cg15774489                          | SERHL2                     | 0.00016796        | 0.00016796           | 0.225059           | -4.44328                     | T down vs N                            | 23.782  | 20.8327   | 14.0157    | 1         |
| cg15777028                          | SLC38A1;SLC38A1            | 7.25E-05          | 7.25E-05             | 0.278735           | -3.58764                     | T down vs N                            | 28.041  | 15.2855   | 8.72192    | 1         |
| cg15777261                          | CCT7;CCT7;CCT7;CCT7;CCT7   | 5.64E-05          | 5.64E-05             | 0.16725            | -5.97906                     | T down vs N                            | 29.401  | 29.9519   | 16.2996    | 1         |
| cg15777769                          | AMPH;AMPH                  | 0.00023967        | 0.000239665          | 0.304725           | -3.28164                     | T down vs N                            | 22.113  | 13.2265   | 9.57032    | 1         |
| cg15778054                          | KCTD14                     | 1.17E-05          | 1.17E-05             | 5.6259             | 5.6259                       | T up vs N                              | 39.009  | 27.9472   | 11.4629    | 1         |

| Probeset ID                    | UCSC_REFGENE_NAME            | p-value<br>(Type) | p-value (T vs.<br>N) | Ratio (T<br>vs. N) | Fold-<br>Change (T<br>vs. N) | Fold-Change (T vs.<br>N) (Description) | F(Type) | SS (Type) | SS (Error) | F (Error) |
|--------------------------------|------------------------------|-------------------|----------------------|--------------------|------------------------------|----------------------------------------|---------|-----------|------------|-----------|
| cg15778232                     | PHB2;PHB2;EMG1               | 5.48E-05          | 5.48E-05             | 0.316706           | -3.1575                      | T down vs N                            | 29.568  | 12.382    | 6.70028    | 1         |
| cg15779837                     | GRIN2D                       | 0.00340129        | 0.00340129           | 4.5569             | 4.5569                       | T up vs N                              | 11.798  | 21.5441   | 29.2184    | 1         |
| cg15780540                     | CRYBA2;CRYBA2;CRYBA2         | 0.00023105        | 0.00023105           | 3.9872             | 3.9872                       | T up vs N                              | 22.281  | 17.9168   | 12.8661    | 1         |
| cg15781504                     | OR51S1                       | 5.61E-06          | 5.61E-06             | 0.17321            | -5.77335                     | T down vs N                            | 44.189  | 28.7906   | 10.4245    | 1         |
| cg15782153                     | C7orf20                      | 0.00019445        | 0.000194451          | 0.246956           | -4.04931                     | T down vs N                            | 23.085  | 18.3196   | 12.697     | 1         |
| cg15782228                     | LAMA5                        | 0.00142874        | 0.00142874           | 0.185925           | -5.37851                     | T down vs N                            | 14.788  | 26.511    | 28.6836    | 1         |
| cg15782391                     | ACPT                         | 0.00020492        | 0.000204915          | 0.19523            | -5.12216                     | T down vs N                            | 22.839  | 24.9943   | 17.5099    | 1         |
| cg15783466                     | OR6C2                        | 9.63E-05          | 9.63E-05             | 0.283458           | -3.52786                     | T down vs N                            | 26.551  | 14.8861   | 8.97064    | 1         |
| cg15785860                     | ADH1C                        | 0.00020138        | 0.00020138           | 0.254595           | -3.9278                      | T down vs N                            | 22.921  | 17.5301   | 12.2371    | 1         |
| cg15786205                     | NR2E1                        | 7.51E-05          | 7.51E-05             | 0.234613           | -4.26234                     | T down vs N                            | 27.852  | 19.6874   | 11.3099    | 1         |
| cg15789106                     | RASSF7;RASSF7;RASSF7         | 2.35E-06          | 2.35E-06             | 0.250546           | -3.99128                     | T down vs N                            | 50.96   | 17.9433   | 5.63375    | 1         |
| cg15790214                     | HCG11                        | 8.48E-06          | 8.48E-06             | 7.84361            | 7.84361                      | T up vs N                              | 41.211  | 39.7346   | 15.4267    | 1         |
| cg15791438                     | SFI1;SFI1                    | 0.00216159        | 0.00216159           | 0.241496           | -4.14085                     | T down vs N                            | 13.318  | 18.9099   | 22.7182    | 1         |
| cg15792367                     | KLK11;KLK11;KLK11            | 8.75E-06          | 8.75E-06             | 0.187784           | -5.32528                     | T down vs N                            | 40.991  | 26.1985   | 10.226     | 1         |
| cg15795702                     | FUT6;FUT6                    | 0.00084812        | 0.000848122          | 0.275196           | -3.63378                     | T down vs N                            | 16.756  | 15.5928   | 14.889     | 1         |
| cg15800010                     | CRYBA4                       | 0.00013069        | 0.000130694          | 0.292145           | -3.42296                     | T down vs N                            | 25.007  | 14.1817   | 9.0739     | 1         |
| cg15805567                     | ARHGAP22                     | 0.00066           | 0.000659997          | 0.295727           | -3.3815                      | T down vs N                            | 17.751  | 13.9022   | 12.5307    | 1         |
| cg15808472                     | RNMT                         | 2.36E-05          | 2.36E-05             | 0.206864           | -4.83409                     | T down vs N                            | 34.489  | 23.2544   | 10.788     | 1         |
| cg15809217                     | BAT3;BAT3;BAT3;BAT3          | 2.13E-05          | 2.13E-05             | 0.261018           | -3.83115                     | T down vs N                            | 35.13   | 16.8974   | 7.69592    | 1         |
| cg15810285                     | HLKP1                        | 1.12E-05          | 1.12E-05             | 0.290609           | -3.44105                     | T down vs N                            | 39.268  | 14.3035   | 5.82805    | 1         |
| cg15810415                     | ENPEP                        | 0.00012569        | 0.000125688          | 0.282046           | -3.54552                     | T down vs N                            | 25.201  | 15.0042   | 9.52621    | 1         |
| cg15811371                     | MUC16                        | 7.72E-05          | 7.72E-05             | 0.229622           | -4.35498                     | T down vs N                            | 27.71   | 20.2757   | 11.7075    | 1         |
| cg15811427                     | FPR1                         | 0.00013711        | 0.000137106          | 0.1969             | -5.07872                     | T down vs N                            | 24.77   | 24.7343   | 15.9771    | 1         |
| cg15811668                     | MEG8                         | 0.00044695        | 0.00044695           | 0.326909           | -3.05896                     | T down vs N                            | 19.363  | 11.7085   | 9.6751     | 1         |
| cg15812025                     | TKTL1;TEX28;TKTL1            | 2.20E-06          | 2.20E-06             | 0.145579           | -6.86913                     | T down vs N                            | 51.498  | 34.781    | 10.8061    | 1         |
| cg15812753                     | HOXD3                        | 0.00011493        | 0.000114933          | 11.0144            | 11.0144                      | T up vs N                              | 25.649  | 53.9132   | 33.6312    | 1         |
| cg15812873                     | SULT1A1                      | 0.00025385        | 0.000253846          | 4.12915            | 4.12915                      | T up vs N                              | 21.85   | 18.8347   | 13.7922    | 1         |
| cg15815084                     | DGKE                         | 0.00235336        | 0.00235336           | 0.276597           | -3.61536                     | T down vs N                            | 13.347  | 14.5602   | 16.3631    | 1         |
| cg15816012                     | LILRB3;LILRB3;LILRB3;LILRB3  | 0.0010041         | 0.0010041            | 0.283455           | -3.5279                      | T down vs N                            | 16.105  | 14.8863   | 14.7896    | 1         |
| cg15816503                     | C8orf74                      | 4.27E-06          | 4.27E-06             | 0.259607           | -3.85198                     | T down vs N                            | 46.229  | 17.0341   | 5.89551    | 1         |
| cg15819333                     | COX4NB;COX4I1;COX4NB         | 7.72E-06          | 7.72E-06             | 0.235486           | -4.24654                     | T down vs N                            | 41.874  | 19.5867   | 7.48412    | 1         |
| cg15819739                     | KIFC1                        | 2.51E-05          | 2.51E-05             | 0.225819           | -4.42833                     | T down vs N                            | 34.096  | 20.7386   | 9.7319     | 1         |
| cg15821546                     | SLC44A4                      | 0.00050721        | 0.000507209          | 0.333162           | -3.00154                     | T down vs N                            | 18.831  | 11.3151   | 9.614      | 1         |
| cg15824056                     | SYNJ2                        | 2.25E-05          | 2.25E-05             | 5.73204            | 5.73204                      | T up vs N                              | 34.779  | 28.5552   | 13.1367    | 1         |
| cg15826897                     | EPHX3;EPHX3                  | 2.66E-06          | 2.66E-06             | 13.3952            | 13.3952                      | T up vs N                              | 49.951  | 63.067    | 20.2014    | 1         |
| cg15827214                     | STMN2                        | 0.00016585        | 0.000165845          | 0.27683            | -3.61233                     | T down vs N                            | 23.843  | 15.45     | 10.3678    | 1         |
| cg15827285                     | RNASEN;RNASEN                | 0.00026721        | 0.000267213          | 0.243731           | -4.10288                     | T down vs N                            | 21.617  | 18.6655   | 13.8157    | 1         |
| cg15829092                     | ATP11A;ATP11A                | 0.00321381        | 0.00321381           | 0.30451            | -3.28397                     | T down vs N                            | 11.983  | 13.2423   | 17.6818    | 1         |
| cg15830940                     | SMARCAL1;SMARCAL1            | 0.00016671        | 0.000166713          | 0.284979           | -3.50903                     | T down vs N                            | 23.818  | 14.7599   | 9.91516    | 1         |
| cg15831598                     | PPAN                         | 3.23E-06          | 3.23E-06             | 0.330732           | -3.0236                      | T down vs N                            | 48.411  | 11.4663   | 3.78968    | 1         |
| cg15831905                     | NEK2                         | 2.82E-06          | 2.82E-06             | 0.204422           | -4.89183                     | T down vs N                            | 49.472  | 23.6062   | 7.63461    | 1         |
| cg15833746                     | CTNNA3;CTNNA3                | 2.39E-05          | 2.39E-05             | 0.194693           | -5.1363                      | T down vs N                            | 34.416  | 25.0787   | 11.6591    | 1         |
| cg15833940                     | DLGAP2                       | 5.99E-05          | 5.99E-05             | 6.31668            | 6.31668                      | T up vs N                              | 29.078  | 31.8203   | 17.5092    | 1         |
| cg15834072                     | DCHS2;DCHS2                  | 0.00031767        | 0.000317668          | 23.8526            | 23.8526                      | T up vs N                              | 20.842  | 94.2321   | 72.3396    | 1         |
| cg15834355                     | HOXC4                        | 0.00079106        | 0.000791062          | 4.3883             | 4.3883                       | T up vs N                              | 17.029  | 20.4863   | 19.2479    | 1         |
| cg15835339                     | SFTA1P                       | 8.77E-06          | 8.77E-06             | 0.210432           | -4.75213                     | T down vs N                            | 40.981  | 22.7524   | 8.883      | 1         |
| cg15835620                     | ALDOC;ALDOC                  | 0.0005432         | 0.000543195          | 4.12553            | 4.12553                      | T up vs N                              | 18.546  | 18.8113   | 16.2286    | 1         |
| cg15837233                     | TBR1                         | 0.00042861        | 0.000428606          | 0.272558           | -3.66894                     | T down vs N                            | 19.541  | 15.8264   | 12.9586    | 1         |
| cg15837470                     | C1R                          | 0.00101639        | 0.00101639           | 0.309399           | -3.23207                     | T down vs N                            | 16.058  | 12.8899   | 12.8432    | 1         |
| cg15837531                     | STX8                         | 0.00011716        | 0.000117164          | 0.263323           | -3.79761                     | T down vs N                            | 25.552  | 16.6769   | 10.4425    | 1         |
| cg15845071                     | C11orf40                     | 0.00045917        | 0.000459174          | 0.220391           | -4.53739                     | T down vs N                            | 19.249  | 21.4223   | 17.8069    | 1         |
| cg15845653                     | SLC4A5                       | 0.00167632        | 0.00167632           | 0.315045           | -3.17415                     | T down vs N                            | 14.211  | 12.4955   | 14.0684    | 1         |
| cg15845673                     | BCAT1                        | 0.00023049        | 0.000230488          | 0.180091           | -5.55274                     | T down vs N                            | 22.292  | 27.5252   | 19.7558    | 1         |
| cg15847272                     | C2;C2;CFB                    | 0.00040448        | 0.000404479          | 0.33201            | -3.01196                     | T down vs N                            | 19.789  | 11.3865   | 9.20645    | 1         |
| cg15849724                     | FAM83B                       | 0.00050192        | 0.000501921          | 0.195425           | -5.11704                     | T down vs N                            | 18.875  | 24.9637   | 21.1616    | 1         |
| cg15852352                     | OR10T2                       | 6.97E-07          | 6.97E-07             | 0.110839           | -9.02212                     | T down vs N                            | 61.781  | 45.319    | 11.7366    | 1         |
| cg15855924                     | ANKRD10                      | 7.43E-06          | 7.43E-06             | 0.196046           | -5.10084                     | T down vs N                            | 42.144  | 24.8668   | 9.44078    | 1         |
| cg15856055                     | TUBGCP2;ZNF511               | 6.71E-05          | 6.71E-05             | 0.174596           | -5.7275                      | T down vs N                            | 28.457  | 28.5293   | 16.0406    | 1         |
| cg15863322                     | MTUS2                        | 0.00074262        | 0.000742624          | 0.244014           | -4.09813                     | T down vs N                            | 17.279  | 18.6349   | 17.2552    | 1         |
| cg15864691                     | HOXA10                       | 0.00038567        | 0.00038567           | 0.176641           | -5.66119                     | T down vs N                            | 19.994  | 28.1499   | 22.5269    | 1         |
| PSMA8;PSMA8;PSMA8;PSMA8;PSMA8  |                              |                   |                      |                    |                              |                                        |         |           |            |           |
| cg15865827                     | ;PSMA8                       | 0.0005359         | 0.000535895          | 3.01043            | 3.01043                      | T up vs N                              | 18.602  | 11.376    | 9.78456    | 1         |
| cg15867829                     | PABPC4L                      | 0.00102236        | 0.00102236           | 0.208389           | -4.79871                     | T down vs N                            | 16.036  | 23.0381   | 22.9866    | 1         |
| cg15870576                     | ADAMTS2                      | 0.00225031        | 0.00225031           | 0.229834           | -4.35096                     | T down vs N                            | 13.179  | 20.2503   | 24.5844    | 1         |
| cg15873112                     | ATXN7L1;ATXN7L1              | 0.00307818        | 0.00307818           | 0.249023           | -4.0157                      | T down vs N                            | 12.125  | 18.1019   | 23.8879    | 1         |
| PCDHGA4;PCDHGA9;PCDHGA1;PCDHG  |                              |                   |                      |                    |                              |                                        |         |           |            |           |
| B1;PCDHGB7;PCDHGB6;PCDHGA11;PC |                              |                   |                      |                    |                              |                                        |         |           |            |           |
| cg15874877                     | DHGB3;PCDHGA6;PCDHGA8;PCDHGA | 0.00073025        | 0.000730249          | 3.66569            | 3.66569                      | T up vs N                              | 17.346  | 15.8049   | 14.5784    | 1         |
| cg15876464                     | MMP9                         | 0.00347211        | 0.00347211           | 0.186004           | -5.37622                     | T down vs N                            | 11.731  | 26.4976   | 36.1416    | 1         |
| cg15877425                     | TSGA13                       | 0.00016047        | 0.000160473          | 0.118092           | -8.46795                     | T down vs N                            | 24.002  | 42.7446   | 28.4942    | 1         |
| cg15877520                     | RNF39;RNF39                  | 0.0001249         | 0.000124896          | 6.81709            | 6.81709                      | T up vs N                              | 25.232  | 34.507    | 21.8812    | 1         |

| Probeset ID                                                                         | UCSC_REFGENE_NAME         | p-value<br>(Type) | p-value (T vs.<br>N) | Ratio (T<br>vs. N) | Fold-<br>Change (T<br>vs. N) | Fold-Change (T vs.<br>N) (Description) | F(Type) | SS (Type) | SS (Error) | F (Error) |
|-------------------------------------------------------------------------------------|---------------------------|-------------------|----------------------|--------------------|------------------------------|----------------------------------------|---------|-----------|------------|-----------|
| cg15880716                                                                          | TTC12                     | 0.00331024        | 0.00331024           | 0.310787           | -3.21764                     | T down vs N                            | 11.886  | 12.7917   | 17.2192    | 1         |
| cg15885788                                                                          | INTS2;INTS2               | 7.02E-06          | 7.02E-06             | 0.22567            | -4.43126                     | T down vs N                            | 42.549  | 20.7571   | 7.80546    | 1         |
| cg15887283                                                                          | PON1                      | 0.00298272        | 0.00298272           | 0.268869           | -3.71928                     | T down vs N                            | 12.229  | 16.16     | 21.1438    | 1         |
| cg15888097                                                                          | HTR1E                     | 2.42E-05          | 2.42E-05             | 0.293175           | -3.41094                     | T down vs N                            | 34.333  | 14.1007   | 6.57125    | 1         |
| cg15889057                                                                          | ITGB7                     | 2.70E-06          | 2.70E-06             | 0.185859           | -5.38042                     | T down vs N                            | 49.825  | 26.5222   | 8.51698    | 1         |
| cg15890143                                                                          | NGB                       | 0.00015161        | 0.000151608          | 14.1487            | 14.1487                      | T up vs N                              | 24.277  | 65.7551   | 43.3359    | 1         |
| cg15892280                                                                          | ETS2                      | 0.00043186        | 0.000431857          | 0.3222             | -3.10366                     | T down vs N                            | 19.509  | 12.0144   | 9.85356    | 1         |
| cg15892784                                                                          | GPR25                     | 1.47E-06          | 1.47E-06             | 8.05828            | 8.05828                      | T up vs N                              | 54.968  | 40.7832   | 11.8712    | 1         |
| cg15900248                                                                          | HOOK1                     | 0.00517242        | 0.00517242           | 3.84676            | 3.84676                      | T up vs N                              | 10.471  | 16.9999   | 25.9766    | 1         |
| cg15901963                                                                          | PDGFA;PDGFA               | 2.15E-05          | 2.15E-05             | 0.257644           | -3.88133                     | T down vs N                            | 35.066  | 17.2264   | 7.86013    | 1         |
| cg15903624                                                                          | NPTX2                     | 0.00047189        | 0.000471893          | 0.242836           | -4.118                       | T down vs N                            | 19.133  | 18.7629   | 15.6902    | 1         |
| cg15903955                                                                          | C8orf45;C8orf45;C8orf45   | 0.0039734         | 0.0039734            | 0.308166           | -3.24501                     | T down vs N                            | 11.297  | 12.9778   | 18.3808    | 1         |
| cg15905666                                                                          | OR4C12                    | 0.00023579        | 0.000235792          | 0.236037           | -4.23662                     | T down vs N                            | 22.188  | 19.5234   | 14.0788    | 1         |
| cg15908367                                                                          | TSC22D4                   | 1.39E-05          | 1.39E-05             | 0.238185           | -4.19842                     | T down vs N                            | 37.875  | 19.2792   | 8.14427    | 1         |
| cg15908708                                                                          | CXCR1                     | 8.56E-05          | 8.56E-05             | 0.253167           | -3.94996                     | T down vs N                            | 27.161  | 17.6746   | 10.4116    | 1         |
| cg15908975                                                                          | MIR592;GRM8;GRM8;GRM8     | 0.00035637        | 0.000356369          | 0.292106           | -3.42342                     | T down vs N                            | 20.337  | 14.1848   | 11.1599    | 1         |
| cg15909933                                                                          | NODAL                     | 6.73E-06          | 6.73E-06             | 43.417             | 43.417                       | T up vs N                              | 42.851  | 133.18    | 49.7283    | 1         |
| cg15911165                                                                          | ORSB12                    | 6.00E-05          | 6.00E-05             | 0.233464           | -4.28331                     | T down vs N                            | 29.063  | 19.8209   | 10.9121    | 1         |
| cg15916061                                                                          | SLC17A4                   | 0.00031556        | 0.00031556           | 0.248284           | -4.02765                     | T down vs N                            | 20.872  | 18.1793   | 13.9361    | 1         |
| cg15919410                                                                          | EEFSEC                    | 9.15E-07          | 9.15E-07             | 0.13675            | -7.31263                     | T down vs N                            | 59.214  | 37.0761   | 10.0183    | 1         |
| cg15919612                                                                          | NOTCH4                    | 0.00019549        | 0.000195491          | 0.210068           | -4.76036                     | T down vs N                            | 23.06   | 22.803    | 15.8216    | 1         |
| cg15920887                                                                          | MSTN                      | 0.000298          | 0.000297995          | 0.269094           | -3.71618                     | T down vs N                            | 21.126  | 16.1395   | 12.2232    | 1         |
| cg15920906                                                                          | CUX2                      | 2.12E-05          | 2.12E-05             | 0.20616            | -4.85059                     | T down vs N                            | 35.152  | 23.3551   | 10.6305    | 1         |
| cg15922045                                                                          | COL6A6                    | 0.00079702        | 0.000797022          | 0.26643            | -3.75333                     | T down vs N                            | 17      | 16.385    | 15.4213    | 1         |
| cg15923484                                                                          | LCE1E                     | 0.00137415        | 0.00137415           | 0.296312           | -3.37482                     | T down vs N                            | 14.931  | 13.8571   | 14.8497    | 1         |
| cg15924691                                                                          | EPHB1                     | 0.0003144         | 0.000314398          | 0.291175           | -3.43437                     | T down vs N                            | 20.888  | 14.2585   | 10.9219    | 1         |
| cg15924693                                                                          | KIFC1                     | 2.52E-05          | 2.52E-05             | 4.61918            | 4.61918                      | T up vs N                              | 34.087  | 21.9315   | 10.2943    | 1         |
| cg15924868                                                                          | C11orf21;TSPAN32;C11orf21 | 1.25E-05          | 1.25E-05             | 0.204863           | -4.88132                     | T down vs N                            | 38.537  | 23.5422   | 9.77443    | 1         |
| cg15926585                                                                          | COMT;TXNRD2               | 0.00579598        | 0.00579598           | 0.295038           | -3.38939                     | T down vs N                            | 10.123  | 13.9555   | 22.0566    | 1         |
| cg15926671                                                                          | LTBP2                     | 0.00010268        | 0.000102684          | 6.72085            | 6.72085                      | T up vs N                              | 26.221  | 33.9977   | 20.7452    | 1         |
| cg15927196                                                                          | PON3                      | 8.01E-06          | 8.01E-06             | 3.42622            | 3.42622                      | T up vs N                              | 41.617  | 14.2036   | 5.46074    | 1         |
| cg15928106                                                                          | FLJ43663;FLJ43663         | 0.00033457        | 0.00033457           | 0.178131           | -5.61384                     | T down vs N                            | 20.613  | 27.8778   | 21.6386    | 1         |
| cg15929276                                                                          | FKBP5                     | 6.72E-08          | 6.72E-08             | 0.201952           | -4.95167                     | T down vs N                            | 87.842  | 23.9692   | 4.36586    | 1         |
| cg15930041                                                                          | CASP14                    | 1.86E-05          | 1.86E-05             | 0.223723           | -4.46981                     | T down vs N                            | 35.976  | 20.9994   | 9.33938    | 1         |
| cg15935070                                                                          | HCG9                      | 3.40E-05          | 3.40E-05             | 3.2992             | 3.2992                       | T up vs N                              | 32.285  | 13.3456   | 6.61384    | 1         |
| cg15937784                                                                          | MIR526A2                  | 3.90E-05          | 3.90E-05             | 0.218857           | -4.5692                      | T down vs N                            | 31.481  | 21.6207   | 10.9885    | 1         |
| cg15944367                                                                          | PCGF2                     | 0.00095582        | 0.000955817          | 0.238374           | -4.19509                     | T down vs N                            | 16.293  | 19.2579   | 18.9112    | 1         |
| cg15945129                                                                          | C7orf58;C7orf58           | 0.0016368         | 0.0016368            | 0.197075           | -5.07421                     | T down vs N                            | 14.675  | 23.2539   | 23.7686    | 1         |
| cg15946133                                                                          | CXCL13                    | 3.47E-05          | 3.47E-05             | 0.177952           | -5.6195                      | T down vs N                            | 32.173  | 27.9104   | 13.8804    | 1         |
| cg15946268                                                                          | C11orf85                  | 3.77E-08          | 3.77E-08             | 0.139306           | -7.17844                     | T down vs N                            | 95.546  | 36.3891   | 6.09369    | 1         |
| cg15946653                                                                          | ANKK1                     | 7.07E-05          | 7.07E-05             | 3.96045            | 3.96045                      | T up vs N                              | 28.177  | 17.7429   | 10.0751    | 1         |
| cg15948536                                                                          | PALLD;PALLD;PALLD;PALLD   | 2.42E-05          | 2.42E-05             | 0.262332           | -3.81197                     | T down vs N                            | 34.32   | 16.7714   | 7.81877    | 1         |
| cg15948785                                                                          | PTPRN2;PTPRN2;PTPRN2      | 0.00042362        | 0.000423616          | 0.326118           | -3.06638                     | T down vs N                            | 19.591  | 11.7593   | 9.60396    | 1         |
| cg15948851                                                                          | FAM110B                   | 0.00357146        | 0.00357146           | 3.36434            | 3.36434                      | T up vs N                              | 11.639  | 13.7863   | 18.9516    | 1         |
| cg15949845                                                                          | PLEKHH1                   | 0.00141511        | 0.00141511           | 3.15266            | 3.15266                      | T up vs N                              | 14.823  | 12.349    | 13.3295    | 1         |
| cg15952487                                                                          | CD1B                      | 9.92E-08          | 9.92E-08             | 0.156824           | -6.37656                     | T down vs N                            | 82.948  | 32.1468   | 6.20084    | 1         |
| cg15954031                                                                          | MYO10                     | 1.30E-05          | 1.30E-05             | 0.270541           | -3.69629                     | T down vs N                            | 38.299  | 16.0078   | 6.68757    | 1         |
| cg15954353                                                                          | LOC728392                 | 0.00020523        | 0.000205232          | 4.44595            | 4.44595                      | T up vs N                              | 22.832  | 20.8495   | 14.6109    | 1         |
| cg15956162                                                                          | SIP1;SIP1;SIP1            | 9.27E-05          | 9.27E-05             | 0.245105           | -4.07989                     | T down vs N                            | 26.748  | 18.5172   | 11.0766    | 1         |
| cg15958289                                                                          | DCPS                      | 0.00238894        | 0.00238894           | 0.23912            | -4.18199                     | T down vs N                            | 12.975  | 19.174    | 23.6449    | 1         |
| cg15959270                                                                          | DNAJC3                    | 0.00035006        | 0.000350061          | 0.292766           | -3.4157                      | T down vs N                            | 20.415  | 14.1328   | 11.0765    | 1         |
| cg15959363                                                                          | C4orf32                   | 3.78E-05          | 3.78E-05             | 0.226313           | -4.41866                     | T down vs N                            | 31.67   | 20.6777   | 10.4466    | 1         |
| cg15960924                                                                          | GPD1L                     | 0.00115631        | 0.00115631           | 0.284595           | -3.51377                     | T down vs N                            | 15.571  | 14.7917   | 15.1997    | 1         |
| PCDHA6;PCDHA2;PCDHA1;PCDHA7;PCDHA1;PCDHA6;PCDHA5;PCDHA9;PCDHA9;PCDHA3;PCDHA4;PCDHA8 |                           |                   |                      |                    |                              |                                        |         |           |            |           |
| cg15961744                                                                          | HA9;PCDHA3;PCDHA4;PCDHA8  | 7.26E-05          | 7.26E-05             | 4.27626            | 4.27626                      | T up vs N                              | 28.031  | 19.7761   | 11.288     | 1         |
| cg15961920                                                                          | MRPS18B;PPP1R10           | 3.59E-05          | 3.59E-05             | 0.296988           | -3.36714                     | T down vs N                            | 31.974  | 13.8052   | 6.90832    | 1         |
| cg15961993                                                                          | TMEM108;TMEM108           | 2.27E-05          | 2.27E-05             | 0.237346           | -4.21326                     | T down vs N                            | 34.725  | 19.3741   | 8.92676    | 1         |
| cg15963417                                                                          | PAH;PAH                   | 0.00039803        | 0.000398028          | 5.92823            | 5.92823                      | T up vs N                              | 19.858  | 29.6666   | 23.9032    | 1         |
| cg15964468                                                                          | ZSCAN12                   | 0.00454222        | 0.00454222           | 4.42953            | 4.42953                      | T up vs N                              | 10.874  | 20.7462   | 30.5255    | 1         |
| cg15965006                                                                          | STK19;STK19;STK19;DOM3Z   | 0.00037428        | 0.00037428           | 0.135116           | -7.40106                     | T down vs N                            | 20.124  | 37.5255   | 29.8361    | 1         |
| cg15965815                                                                          | SVIL;SVIL                 | 9.41E-05          | 9.41E-05             | 0.309249           | -3.23364                     | T down vs N                            | 26.668  | 12.9006   | 7.73995    | 1         |
| cg15966954                                                                          | IL9                       | 0.0002081         | 0.000208095          | 0.289505           | -3.45418                     | T down vs N                            | 22.767  | 14.3918   | 10.1142    | 1         |
| cg15975217                                                                          | MAML3                     | 0.00656935        | 0.00656935           | 4.52642            | 4.52642                      | T up vs N                              | 9.7471  | 21.3539   | 35.0525    | 1         |
| cg15975283                                                                          | SLC9A11                   | 0.0001955         | 0.0001955            | 0.278278           | -3.59352                     | T down vs N                            | 23.06   | 15.3247   | 10.633     | 1         |
| cg15980076                                                                          | CYP26C1                   | 7.99E-05          | 7.99E-05             | 3.59733            | 3.59733                      | T up vs N                              | 27.527  | 15.3501   | 8.9223     | 1         |
| cg15980798                                                                          | CACNA2D3                  | 0.00023785        | 0.000237854          | 0.15841            | -6.31274                     | T down vs N                            | 22.148  | 31.7987   | 22.9724    | 1         |
| cg15981851                                                                          | AGAP1;AGAP1               | 5.74E-05          | 5.74E-05             | 3.99067            | 3.99067                      | T up vs N                              | 29.31   | 17.9394   | 9.79302    | 1         |
| cg15982117                                                                          | HLA-DRB1                  | 0.0045549         | 0.0045549            | 6.29752            | 6.29752                      | T up vs N                              | 10.865  | 31.7155   | 46.7029    | 1         |
| cg15982299                                                                          | PSORS1C1                  | 3.23E-05          | 3.23E-05             | 0.271306           | -3.68588                     | T down vs N                            | 32.587  | 15.9388   | 7.82596    | 1         |
| cg15982700                                                                          | HOXA3;HOXA3;HOXA3         | 0.00608968        | 0.00608968           | 3.04348            | 3.04348                      | T up vs N                              | 10.175  | 10.9201   | 16.0986    | 1         |



| Probeset ID | UCSC_REFGENE_NAME           | p-value<br>(Type) | p-value (T vs.<br>N) | Ratio (T<br>vs. N) | Fold-<br>Change (T<br>vs. N) | Fold-Change (T vs.<br>N) (Description) | F(Type) | SS (Type) | SS (Error) | F (Error) |
|-------------|-----------------------------|-------------------|----------------------|--------------------|------------------------------|----------------------------------------|---------|-----------|------------|-----------|
| cg16084090  | KLRC2                       | 3.15E-05          | 3.15E-05             | 0.237127           | -4.21714                     | T down vs N                            | 32.73   | 19.399    | 9.48313    | 1         |
| cg16086237  | RIMBP2                      | 0.00017954        | 0.000179544          | 0.312347           | -3.20156                     | T down vs N                            | 23.463  | 12.6823   | 8.64832    | 1         |
| cg16086373  | TMEM200C                    | 0.00670704        | 0.00670704           | 3.89422            | 3.89422                      | T up vs N                              | 9.6854  | 17.3107   | 28.5967    | 1         |
| cg16086579  | EP400                       | 0.00045202        | 0.000452024          | 0.312023           | -3.2049                      | T down vs N                            | 19.315  | 12.705    | 10.5245    | 1         |
| cg16086730  | LOC285692                   | 0.00028389        | 0.00028389           | 0.328082           | -3.04802                     | T down vs N                            | 21.344  | 11.6336   | 8.72102    | 1         |
| cg16087412  | KCNJ12                      | 0.00019523        | 0.000195226          | 3.31477            | 3.31477                      | T up vs N                              | 23.067  | 13.4511   | 9.3303     | 1         |
| cg16087679  | SLFN13                      | 4.02E-05          | 4.02E-05             | 0.179097           | -5.58357                     | T down vs N                            | 31.306  | 27.7033   | 14.1588    | 1         |
| cg16089443  | LIN52;ALDH6A1;ALDH6A1       | 0.00477207        | 0.00477207           | 10.1871            | 10.1871                      | T up vs N                              | 10.72   | 50.4612   | 75.3144    | 1         |
| cg16091292  | C11orf35                    | 2.34E-05          | 2.34E-05             | 0.089294           | -11.1989                     | T down vs N                            | 36.254  | 51.4471   | 21.2861    | 1         |
| cg16091952  | ZNF354C                     | 0.00673934        | 0.00673934           | 0.191818           | -5.21327                     | T down vs N                            | 9.6712  | 25.5367   | 42.2479    | 1         |
| cg16093296  | EBF3                        | 0.00339229        | 0.00339229           | 0.246993           | -4.0487                      | T down vs N                            | 11.806  | 18.3156   | 24.8218    | 1         |
| cg16096432  | SSBP3;SSBP3;SSBP3           | 0.00019553        | 0.000195526          | 3.78602            | 3.78602                      | T up vs N                              | 23.059  | 16.6006   | 11.5186    | 1         |
| cg16101346  | PTGS2                       | 1.16E-05          | 1.16E-05             | 0.137285           | -7.28412                     | T down vs N                            | 39.077  | 36.9307   | 15.1212    | 1         |
| cg16103712  | MATN2;MATN2                 | 0.00015223        | 0.000152232          | 0.202639           | -4.93488                     | T down vs N                            | 24.257  | 23.8675   | 15.7428    | 1         |
| cg16104076  | PTGER4                      | 1.00E-05          | 1.00E-05             | 3.34081            | 3.34081                      | T up vs N                              | 40.035  | 13.6273   | 5.44609    | 1         |
| cg16104584  | SLC2A5                      | 5.37E-07          | 5.37E-07             | 0.245494           | -4.07342                     | T down vs N                            | 64.322  | 18.4754   | 4.59573    | 1         |
| cg16104837  | PSTPIP1                     | 1.13E-06          | 1.13E-06             | 8.26723            | 8.26723                      | T up vs N                              | 57.307  | 41.79     | 11.6678    | 1         |
| cg16105676  | NR2E1                       | 0.00174827        | 0.00174827           | 0.22241            | -4.49619                     | T down vs N                            | 14.062  | 21.1648   | 24.0825    | 1         |
| cg16107389  | C6orf191                    | 0.00214799        | 0.00214799           | 0.220881           | -4.52733                     | T down vs N                            | 13.34   | 21.3595   | 25.6191    | 1         |
| cg16107528  | NTN1                        | 0.00012083        | 0.000120828          | 0.168851           | -5.92238                     | T down vs N                            | 25.398  | 29.6337   | 18.6685    | 1         |
| cg16107628  | TAGLN2                      | 0.00020519        | 0.00020519           | 0.310425           | -3.22139                     | T down vs N                            | 22.833  | 12.8172   | 8.98166    | 1         |
| cg16112129  | DRD1;DRD1                   | 0.00041386        | 0.000413862          | 3.68737            | 3.68737                      | T up vs N                              | 19.69   | 15.9487   | 12.9596    | 1         |
| cg16117799  | PRDM8                       | 0.00053154        | 0.000531536          | 6.44406            | 6.44406                      | T up vs N                              | 18.636  | 32.5133   | 27.9141    | 1         |
| cg16120415  | C1orf61                     | 0.00029165        | 0.000291653          | 0.218432           | -4.57808                     | T down vs N                            | 21.223  | 21.676    | 16.3419    | 1         |
| cg16122592  | MAGEB6                      | 0.00128342        | 0.00128342           | 0.319337           | -3.13149                     | T down vs N                            | 15.182  | 12.2045   | 12.862     | 1         |
| cg16123269  | TRIM15                      | 7.10E-06          | 7.10E-06             | 0.262396           | -3.81104                     | T down vs N                            | 42.472  | 16.7653   | 6.31574    | 1         |
| cg16126186  | HRH4;HRH4;HRH4              | 0.00013685        | 0.000136852          | 0.295418           | -3.38503                     | T down vs N                            | 24.779  | 13.926    | 8.99218    | 1         |
| cg16128701  | FABP5                       | 3.86E-05          | 3.86E-05             | 12.8345            | 12.8345                      | T up vs N                              | 31.552  | 61.0057   | 30.9365    | 1         |
| cg16131766  | MKRN3                       | 2.85E-05          | 2.85E-05             | 0.280023           | -3.57113                     | T down vs N                            | 33.338  | 15.1753   | 7.28307    | 1         |
| cg16132151  | MINPP1                      | 5.85E-06          | 5.85E-06             | 0.262448           | -3.81027                     | T down vs N                            | 43.88   | 16.7602   | 6.11126    | 1         |
| cg16132469  | ORS2B4                      | 6.35E-06          | 6.35E-06             | 0.232596           | -4.2993                      | T down vs N                            | 43.272  | 19.9226   | 7.3665     | 1         |
| cg16134717  | MAD2L2;C1orf187             | 0.00205053        | 0.00205053           | 0.279904           | -3.57266                     | T down vs N                            | 13.501  | 15.1855   | 17.9966    | 1         |
| cg16135451  | DFFB;KIAA0562               | 0.00025093        | 0.000250928          | 0.217817           | -4.591                       | T down vs N                            | 21.902  | 21.7564   | 15.8933    | 1         |
| cg16139517  | CNTN4                       | 2.74E-06          | 2.74E-06             | 0.298737           | -3.34742                     | T down vs N                            | 49.716  | 13.672    | 4.40003    | 1         |
| cg16143654  | PCDHA1;PCDHA1;PCDHA2;PCDHA2 | 0.00025004        | 0.000250035          | 3.12431            | 3.12431                      | T up vs N                              | 21.919  | 12.1554   | 8.87311    | 1         |
| cg16149574  | CYP4Z2P                     | 0.00057655        | 0.000576545          | 0.27197            | -3.67688                     | T down vs N                            | 18.301  | 15.8791   | 13.8826    | 1         |
| cg16158045  | GYG2;GYG2                   | 0.00099385        | 0.000993853          | 3.40509            | 3.40509                      | T up vs N                              | 16.144  | 14.0613   | 13.9361    | 1         |
| cg16158779  | ANKK1                       | 0.00019169        | 0.000191692          | 4.25002            | 4.25002                      | T up vs N                              | 23.153  | 19.6089   | 13.551     | 1         |
| cg16162590  | ADRA1B                      | 0.00017738        | 0.00017738           | 0.332575           | -3.00684                     | T down vs N                            | 23.521  | 11.3514   | 7.7217     | 1         |
| cg16165651  | RASGRP3;RASGRP3;RASGRP3     | 0.00072085        | 0.000720849          | 0.250168           | -3.99732                     | T down vs N                            | 17.398  | 17.9826   | 16.5379    | 1         |
| cg16166968  | ADAM30;ADAM30               | 0.00010843        | 0.000108432          | 3.82643            | 3.82643                      | T up vs N                              | 25.944  | 16.8664   | 10.4019    | 1         |
| cg16167166  | ORSAN1                      | 2.01E-05          | 2.01E-05             | 0.137883           | -7.25254                     | T down vs N                            | 35.485  | 36.7692   | 16.5789    | 1         |
| cg16167524  | GIP                         | 1.04E-05          | 1.04E-05             | 0.102941           | -9.71429                     | T down vs N                            | 39.788  | 48.416    | 19.4697    | 1         |
| cg16167782  | TSHZ1                       | 3.24E-05          | 3.24E-05             | 0.262551           | -3.80879                     | T down vs N                            | 32.58   | 16.7504   | 8.22602    | 1         |
| cg16172549  | PCP4L1                      | 5.39E-05          | 5.39E-05             | 0.32621            | -3.06551                     | T down vs N                            | 29.654  | 11.7534   | 6.34161    | 1         |
| cg16174681  | FER                         | 9.29E-05          | 9.29E-05             | 0.274008           | -3.64952                     | T down vs N                            | 26.734  | 15.6975   | 9.39467    | 1         |
| cg16175713  | CYP39A1                     | 3.08E-05          | 3.08E-05             | 0.255765           | -3.90984                     | T down vs N                            | 32.877  | 17.4128   | 8.47429    | 1         |
| cg16176379  | LPCAT2;LPCAT2               | 0.00059445        | 0.000594449          | 10.9159            | 10.9159                      | T up vs N                              | 18.176  | 53.5105   | 47.1048    | 1         |
| cg16177250  | ORAI2;ORAI2                 | 3.10E-05          | 3.10E-05             | 0.280284           | -3.56782                     | T down vs N                            | 32.827  | 15.1532   | 7.38562    | 1         |
| cg16177739  | PIGC;C1orf105;PIGC          | 6.71E-07          | 6.71E-07             | 0.278917           | -3.5853                      | T down vs N                            | 62.139  | 15.2699   | 3.93182    | 1         |
| cg16177812  | SFRS1;SFRS1                 | 0.00013335        | 0.000133351          | 0.281274           | -3.55525                     | T down vs N                            | 24.907  | 15.0693   | 9.68037    | 1         |
| cg16178603  | MEIS1                       | 0.00164376        | 0.00164376           | 0.048373           | -20.6725                     | T down vs N                            | 15.648  | 71.2835   | 59.2223    | 1         |
| cg16179938  | NFATC1;NFATC1;NFATC1;NFATC1 | 0.00044953        | 0.000449529          | 0.255558           | -3.91301                     | T down vs N                            | 19.338  | 17.4335   | 14.424     | 1         |
| cg16180082  | TAGAP;TAGAP;TAGAP           | 1.25E-07          | 1.25E-07             | 0.217389           | -4.60005                     | T down vs N                            | 80.126  | 21.8127   | 4.35568    | 1         |
| cg16184008  | TMEM217;TMEM217             | 0.0003096         | 0.0003096            | 0.315003           | -3.17457                     | T down vs N                            | 20.956  | 12.4984   | 9.54248    | 1         |
| cg16184131  | IL5;IL5                     | 3.93E-06          | 3.93E-06             | 0.249192           | -4.01296                     | T down vs N                            | 46.865  | 18.0841   | 6.17405    | 1         |
| cg16184495  | EPHX3;EPHX3                 | 5.36E-06          | 5.36E-06             | 11.7997            | 11.7997                      | T up vs N                              | 44.514  | 57.0531   | 20.5069    | 1         |
| cg16188209  | PAH                         | 0.00020842        | 0.000208416          | 4.90977            | 4.90977                      | T up vs N                              | 22.76   | 23.7151   | 16.6717    | 1         |
| cg16189217  | PCCA;PCCA                   | 1.90E-05          | 1.90E-05             | 0.257225           | -3.88765                     | T down vs N                            | 35.828  | 17.2678   | 7.7115     | 1         |
| cg16189995  | KIAA1486                    | 0.00014406        | 0.000144058          | 0.324595           | -3.08076                     | T down vs N                            | 24.527  | 11.8578   | 7.73538    | 1         |
| cg16190888  | ANTXR1                      | 6.66E-05          | 6.66E-05             | 0.218023           | -4.58668                     | T down vs N                            | 28.501  | 21.7295   | 12.1987    | 1         |
| cg16193278  | UBAC2;MIR623;UBAC2;UBAC2    | 0.00061525        | 0.000615252          | 0.247992           | -4.0324                      | T down vs N                            | 18.036  | 18.2101   | 16.1548    | 1         |
| cg16193946  | SHANK1                      | 0.00046987        | 0.000469868          | 0.31242            | -3.20082                     | T down vs N                            | 19.152  | 12.6772   | 10.5911    | 1         |
| cg16194437  | CASD1                       | 2.37E-05          | 2.37E-05             | 0.238185           | -4.19842                     | T down vs N                            | 34.459  | 19.2792   | 8.9517     | 1         |
| cg16196021  | RFC1                        | 6.30E-05          | 6.30E-05             | 0.145612           | -6.86758                     | T down vs N                            | 28.797  | 34.7729   | 19.3202    | 1         |
| cg16197388  | PSG3                        | 4.79E-05          | 4.79E-05             | 0.211439           | -4.72949                     | T down vs N                            | 30.313  | 22.6132   | 11.9359    | 1         |
| cg16197717  | CPXM2                       | 8.93E-06          | 8.93E-06             | 7.54381            | 7.54381                      | T up vs N                              | 40.848  | 38.2452   | 14.9806    | 1         |
| cg16198416  | LRAT                        | 0.0023405         | 0.0023405            | 0.289511           | -3.4541                      | T down vs N                            | 13.045  | 14.3912   | 17.6518    | 1         |
| cg16199280  | TFAP2A;TFAP2A;TFAP2A        | 0.00027318        | 0.000273178          | 0.284809           | -3.51112                     | T down vs N                            | 21.517  | 14.7739   | 10.986     | 1         |
| cg16201883  | FSCN2;FSCN2                 | 0.00027501        | 0.000275014          | 0.147985           | -6.75743                     | T down vs N                            | 21.487  | 34.1917   | 25.4609    | 1         |
| cg16204066  | ITPR3                       | 0.00027555        | 0.000275554          | 4.62743            | 4.62743                      | T up vs N                              | 21.478  | 21.9826   | 16.3761    | 1         |

| Probeset ID | UCSC_REFGENE_NAME                   | p-value<br>(Type) | p-value (T vs.<br>N) | Ratio (T<br>vs. N) | Fold-<br>Change (T<br>vs. N) | Fold-Change (T vs.<br>N) (Description) | F(Type) | SS (Type) | SS (Error) | F (Error) |
|-------------|-------------------------------------|-------------------|----------------------|--------------------|------------------------------|----------------------------------------|---------|-----------|------------|-----------|
| cg16204420  | FGF10                               | 6.41E-06          | 6.41E-06             | 0.178675           | -5.59675                     | T down vs N                            | 43.213  | 27.7793   | 10.2857    | 1         |
| cg16204618  | ZNF320                              | 9.65E-06          | 9.65E-06             | 0.208904           | -4.7869                      | T down vs N                            | 40.317  | 22.9657   | 9.11415    | 1         |
| cg16205352  | PRPH                                | 1.00E-05          | 1.00E-05             | 0.307492           | -3.25212                     | T down vs N                            | 40.069  | 13.0261   | 5.20152    | 1         |
| cg16207673  | ASCL4                               | 0.00011212        | 0.000112121          | 0.138918           | -7.19849                     | T down vs N                            | 25.774  | 36.4921   | 22.6535    | 1         |
| cg16208084  | HSPB9;KAT2A                         | 4.10E-06          | 4.10E-06             | 6.88699            | 6.88699                      | T up vs N                              | 46.541  | 34.8748   | 11.9893    | 1         |
| cg16208657  | LBXCOR1                             | 0.0009235         | 0.0009235            | 6.50097            | 6.50097                      | T up vs N                              | 16.426  | 32.8209   | 31.9701    | 1         |
| cg16212074  | CREB3L3                             | 0.00267989        | 0.00267989           | 0.233713           | -4.27876                     | T down vs N                            | 12.586  | 19.792    | 25.1613    | 1         |
| cg16212145  | GZMB                                | 7.41E-06          | 7.41E-06             | 0.194354           | -5.14525                     | T down vs N                            | 42.169  | 25.1321   | 9.53567    | 1         |
| cg16216148  | ELP2P;GEMIN4                        | 0.00435267        | 0.00435267           | 0.192613           | -5.19177                     | T down vs N                            | 12.784  | 18.2424   | 15.6962    | 1         |
| cg16217908  | C3orf52                             | 8.17E-06          | 8.17E-06             | 0.30024            | -3.33067                     | T down vs N                            | 41.478  | 13.5587   | 5.23018    | 1         |
| cg16218340  | CHCHD6                              | 1.07E-05          | 1.07E-05             | 0.181756           | -5.50189                     | T down vs N                            | 39.583  | 27.2306   | 11.007     | 1         |
| cg16219583  | TRPC7;TRPC7;TRPC7                   | 3.63E-05          | 3.63E-05             | 0.145791           | -6.85912                     | T down vs N                            | 31.908  | 34.7284   | 17.4142    | 1         |
| cg16224104  | C6orf26                             | 3.71E-06          | 3.71E-06             | 0.232407           | -4.30281                     | T down vs N                            | 47.313  | 19.9449   | 6.74487    | 1         |
| cg16226642  | OR5P3                               | 2.30E-07          | 2.30E-07             | 0.223331           | -4.47765                     | T down vs N                            | 73.204  | 21.0486   | 4.60055    | 1         |
| cg16227251  | CYP2C18;CYP2C18                     | 0.0002106         | 0.000210604          | 0.19508            | -5.1261                      | T down vs N                            | 22.711  | 25.0178   | 17.6252    | 1         |
| cg16229671  | C2orf3                              | 2.75E-05          | 2.75E-05             | 0.150623           | -6.63908                     | T down vs N                            | 33.556  | 33.5622   | 16.003     | 1         |
| cg16233450  | OR2T34                              | 0.00042675        | 0.000426749          | 0.24561            | -4.07149                     | T down vs N                            | 19.559  | 18.463    | 15.1031    | 1         |
| cg16233472  | OVOL1                               | 0.00103503        | 0.00103503           | 0.159163           | -6.28285                     | T down vs N                            | 15.989  | 31.6351   | 31.657     | 1         |
| cg16235748  | ZC3H12D                             | 8.04E-05          | 8.04E-05             | 4.88947            | 4.88947                      | T up vs N                              | 27.489  | 23.5918   | 13.7315    | 1         |
| cg16235809  | KIRREL3;KIRREL3                     | 5.65E-05          | 5.65E-05             | 0.236951           | -4.22027                     | T down vs N                            | 29.391  | 19.419    | 10.5715    | 1         |
| cg16236263  | HLA-DMB;HLA-DMB                     | 1.41E-06          | 1.41E-06             | 0.188964           | -5.29201                     | T down vs N                            | 55.288  | 26.0025   | 7.52501    | 1         |
| cg16236270  | MCM7;MCM7                           | 0.0043812         | 0.0043812            | 0.210573           | -4.74896                     | T down vs N                            | 10.987  | 22.7329   | 33.1038    | 1         |
| cg16237191  | OR6C4                               | 6.36E-06          | 6.36E-06             | 0.206989           | -4.83118                     | T down vs N                            | 43.265  | 23.2366   | 8.59321    | 1         |
| cg16238350  | ZIM3                                | 0.00037405        | 0.000374053          | 0.271187           | -3.68749                     | T down vs N                            | 20.126  | 15.9495   | 12.6796    | 1         |
| cg16241033  | FRMD4A                              | 7.33E-06          | 7.33E-06             | 0.30173            | -3.31422                     | T down vs N                            | 42.246  | 13.4473   | 5.09294    | 1         |
| cg16243197  | DHX9                                | 0.00359957        | 0.00359957           | 0.253532           | -3.94428                     | T down vs N                            | 11.614  | 17.6376   | 24.2987    | 1         |
| cg16244006  | CCDC60                              | 0.00404798        | 0.00404798           | 0.325621           | -3.07105                     | T down vs N                            | 11.238  | 11.7913   | 16.7883    | 1         |
| cg16247184  | CCDC46;CCDC46;CCDC46                | 0.00167361        | 0.00167361           | 0.301834           | -3.31308                     | T down vs N                            | 14.217  | 13.4396   | 15.1251    | 1         |
| cg16250754  | CARD6                               | 5.78E-06          | 5.78E-06             | 0.185434           | -5.39277                     | T down vs N                            | 43.968  | 26.5945   | 9.67786    | 1         |
| cg16251579  | HIST3H3                             | 9.36E-06          | 9.36E-06             | 0.149566           | -6.68599                     | T down vs N                            | 40.527  | 33.8124   | 13.3491    | 1         |
| cg16253580  | OR6B1                               | 2.48E-06          | 2.48E-06             | 0.265771           | -3.76264                     | T down vs N                            | 50.531  | 16.4465   | 5.20756    | 1         |
| cg16253663  | C4orf50                             | 1.27E-05          | 1.27E-05             | 0.237003           | -4.21935                     | T down vs N                            | 38.469  | 19.413    | 8.07437    | 1         |
| cg16253989  | GMIP                                | 8.83E-05          | 8.83E-05             | 0.235618           | -4.24417                     | T down vs N                            | 27.002  | 19.5715   | 11.5971    | 1         |
| cg16254330  | PSG3                                | 4.67E-05          | 4.67E-05             | 0.30545            | -3.27386                     | T down vs N                            | 30.464  | 13.1737   | 6.91902    | 1         |
| cg16255631  | MYBPC2                              | 5.69E-06          | 5.69E-06             | 0.107504           | -9.30195                     | T down vs N                            | 44.077  | 46.5864   | 16.9108    | 1         |
| cg16257029  | ADAM12;ADAM12                       | 0.00064996        | 0.000649957          | 3.6613             | 3.6613                       | T up vs N                              | 17.813  | 15.7757   | 14.17      | 1         |
| cg16257533  | NTM;NTM;NTM;NTM                     | 8.18E-09          | 8.18E-09             | 0.173276           | -5.77113                     | T down vs N                            | 131.11  | 27.0851   | 3.09882    | 1         |
| cg16259591  | PNLIP                               | 2.07E-06          | 2.07E-06             | 0.233718           | -4.27866                     | T down vs N                            | 52.02   | 19.7913   | 6.08732    | 1         |
| cg16259931  | MORC1                               | 2.38E-05          | 2.38E-05             | 0.176063           | -5.67979                     | T down vs N                            | 34.445  | 28.2565   | 13.1253    | 1         |
| cg16262215  | NDUFA7;KANK3                        | 0.0001837         | 0.000183695          | 0.272648           | -3.66774                     | T down vs N                            | 23.355  | 15.8185   | 10.8371    | 1         |
| cg16265348  | LOC284798;LOC284798;LOC284798       | 0.00014838        | 0.000148384          | 5.88707            | 5.88707                      | T up vs N                              | 24.382  | 29.4348   | 19.3156    | 1         |
| cg16265542  | LCE6A                               | 6.17E-06          | 6.17E-06             | 0.186901           | -5.35042                     | T down vs N                            | 43.484  | 26.3462   | 9.69413    | 1         |
| cg16265553  | ITPKB                               | 4.47E-05          | 4.47E-05             | 0.280234           | -3.56844                     | T down vs N                            | 30.703  | 15.1574   | 7.8989     | 1         |
| cg16265707  | NCALD;NCALD;NCALD;NCALD;NCALD;      | 3.28E-05          | 3.28E-05             | 0.323743           | -3.08887                     | T down vs N                            | 32.499  | 11.9133   | 5.86509    | 1         |
| cg16265717  | LEPR;LEPR;LEPR                      | 0.00026398        | 0.000263982          | 0.29137            | -3.43206                     | T down vs N                            | 21.672  | 14.243    | 10.5154    | 1         |
| cg16267236  | TF                                  | 0.00135837        | 0.00135837           | 3.60334            | 3.60334                      | T up vs N                              | 14.973  | 15.3902   | 16.4459    | 1         |
| cg16267322  | SLC24A4;SLC24A4;SLC24A4             | 0.00018163        | 0.000181631          | 3.42346            | 3.42346                      | T up vs N                              | 23.408  | 14.1851   | 9.6958     | 1         |
| cg16270018  | HTN1                                | 2.05E-05          | 2.05E-05             | 0.142792           | -7.00319                     | T down vs N                            | 35.355  | 35.4822   | 16.0578    | 1         |
| cg16273075  | PRDM2;PRDM2;PRDM2;PRDM2             | 0.00057188        | 0.000571881          | 3.14691            | 3.14691                      | T up vs N                              | 18.334  | 12.3098   | 10.7425    | 1         |
| cg16273909  | CAPZA2                              | 2.72E-05          | 2.72E-05             | 0.257179           | -3.88834                     | T down vs N                            | 33.612  | 17.2723   | 8.22186    | 1         |
| cg16274024  | SHANK2                              | 0.00136386        | 0.00136386           | 0.168298           | -5.94186                     | T down vs N                            | 14.958  | 29.7432   | 31.8149    | 1         |
| cg16274221  | OR2T1                               | 0.00030531        | 0.000305309          | 0.15442            | -6.47584                     | T down vs N                            | 21.018  | 32.6852   | 24.8813    | 1         |
| cg16274678  | TPM3;TPM3;NUP210L;TPM3;TPM3;N       | 0.00103894        | 0.00103894           | 0.279077           | -3.58324                     | T down vs N                            | 15.975  | 15.2562   | 15.2804    | 1         |
| cg16275483  | UP210L                              | 0.00093071        | 0.000930709          | 0.27823            | -3.59414                     | T down vs N                            | 16.396  | 15.3289   | 14.9588    | 1         |
| cg16278877  | SYPL2                               | 0.00011112        | 0.000111123          | 0.263517           | -3.79482                     | T down vs N                            | 25.819  | 16.6585   | 10.3231    | 1         |
| cg16279158  | CDC42BPG                            | 1.29E-05          | 1.29E-05             | 0.228653           | -4.37344                     | T down vs N                            | 38.332  | 20.3925   | 8.51204    | 1         |
| cg16282160  | HBE1;HBE1                           | 5.13E-08          | 5.13E-08             | 0.186039           | -5.37521                     | T down vs N                            | 91.354  | 26.4917   | 4.63981    | 1         |
| cg16282242  | NCOA2                               | 0.00289989        | 0.00289989           | 3.03554            | 3.03554                      | T up vs N                              | 12.322  | 11.5482   | 14.9951    | 1         |
| cg16289210  | TMCC3                               | 3.93E-06          | 3.93E-06             | 0.257383           | -3.88526                     | T down vs N                            | 46.878  | 17.2522   | 5.8884     | 1         |
| cg16292193  | FMOD                                | 0.00094907        | 0.000949068          | 0.206906           | -4.83311                     | T down vs N                            | 16.321  | 23.2484   | 22.7917    | 1         |
| cg16293105  | GJC2                                | 0.00094907        | 0.000949068          | 0.206906           | -4.83311                     | T down vs N                            | 16.321  | 23.2484   | 22.7917    | 1         |
| cg16293105  | SIGLEC6;SIGLEC6;SIGLEC6;SIGLEC6;SIG | 3.04E-05          | 3.04E-05             | 0.261983           | -3.81705                     | T down vs N                            | 32.956  | 16.8048   | 8.15875    | 1         |
| cg16293669  | LEC6;SIGLEC6                        | 0.00054136        | 0.000541362          | 0.30518            | -3.27676                     | T down vs N                            | 18.56   | 13.1934   | 11.3734    | 1         |
| cg16294152  | ANKH                                | 0.00069582        | 0.000695815          | 0.257268           | -3.887                       | T down vs N                            | 17.539  | 17.2635   | 15.7488    | 1         |
| cg16295133  | AHRR                                | 2.73E-05          | 2.73E-05             | 0.213996           | -4.67299                     | T down vs N                            | 33.589  | 22.2647   | 10.6058    | 1         |
| cg16295676  | CUZD1                               | 0.0003185         | 0.0003185            | 0.30318            | -3.29837                     | T down vs N                            | 20.831  | 13.3399   | 10.2464    | 1         |
| cg16298547  | IKZF5                               | 2.44E-05          | 2.44E-05             | 4.33677            | 4.33677                      | T up vs N                              | 34.291  | 20.1604   | 9.40681    | 1         |
| cg16298547  | ELOVL7;ELOVL7                       | 2.44E-05          | 2.44E-05             | 4.33677            | 4.33677                      | T up vs N                              | 34.291  | 20.1604   | 9.40681    | 1         |
| cg16299636  | TMEM167A                            | 1.19E-05          | 1.19E-05             | 0.19153            | -5.22112                     | T down vs N                            | 38.899  | 25.5833   | 10.523     | 1         |
| cg16301004  | ITPRIP                              | 4.82E-05          | 4.82E-05             | 0.21984            | -4.54877                     | T down vs N                            | 30.278  | 21.4934   | 11.3579    | 1         |

| Probeset ID | UCSC_REFGENE_NAME                                                                                       | p-value<br>(Type) | p-value (T vs.<br>N) | Ratio (T<br>vs. N) | Fold-<br>Change (T<br>vs. N) | Fold-Change (T vs.<br>N) (Description) | F(Type) | SS (Type) | SS (Error) | F (Error) |
|-------------|---------------------------------------------------------------------------------------------------------|-------------------|----------------------|--------------------|------------------------------|----------------------------------------|---------|-----------|------------|-----------|
| cg16302655  | TTC12                                                                                                   | 6.88E-06          | 6.88E-06             | 5.99303            | 5.99303                      | T up vs N                              | 42.693  | 30.0302   | 11.2545    | 1         |
| cg16303353  | CACNA1C;CACNA1C;CACNA1C;CACNA1C;CACNA1C;CACNA1C;CACNA1C;CACNA1C;CACNA1C;PRKAR1B;PRKAR1B;PRKAR1B;PRKAR1B | 1.40E-05          | 1.40E-05             | 0.174583           | -5.72794                     | T down vs N                            | 37.817  | 28.5318   | 12.0717    | 1         |
|             | B;PRKAR1B;PRKAR1B                                                                                       | 3.44E-05          | 3.44E-05             | 0.227419           | -4.39717                     | T down vs N                            | 32.225  | 20.5423   | 10.1994    | 1         |
| cg16305516  | DUSP22                                                                                                  | 8.95E-06          | 8.95E-06             | 0.318048           | -3.14418                     | T down vs N                            | 40.834  | 12.2911   | 4.81607    | 1         |
| cg16306115  | KAAG1;KAAG1;DCDC2                                                                                       | 0.00144114        | 0.00144114           | 4.07373            | 4.07373                      | T up vs N                              | 14.757  | 18.4774   | 20.0344    | 1         |
| cg16306978  | APOB                                                                                                    | 2.65E-05          | 2.65E-05             | 11.3299            | 11.3299                      | T up vs N                              | 33.777  | 55.19     | 26.1433    | 1         |
| cg16308533  | NTNAP1                                                                                                  | 3.10E-05          | 3.10E-05             | 5.79856            | 5.79856                      | T up vs N                              | 32.828  | 28.9338   | 14.102     | 1         |
| cg16309319  | OR52B2                                                                                                  | 0.0001631         | 0.000163098          | 0.230898           | -4.33092                     | T down vs N                            | 23.924  | 20.1233   | 13.4584    | 1         |
| cg16311462  | STK10                                                                                                   | 4.68E-05          | 4.68E-05             | 0.245558           | -4.07236                     | T down vs N                            | 30.441  | 18.4685   | 9.70728    | 1         |
| cg16312954  | TRPV5                                                                                                   | 0.00212177        | 0.00212177           | 0.325466           | -3.07252                     | T down vs N                            | 13.382  | 11.8014   | 14.1099    | 1         |
| cg16315106  | DAXX;DAXX;DAXX;DAXX                                                                                     | 0.00151228        | 0.00151228           | 0.189977           | -5.2638                      | T down vs N                            | 14.582  | 25.836    | 28.3492    | 1         |
| cg16315582  | CASP4                                                                                                   | 3.95E-05          | 3.95E-05             | 0.253406           | -3.94623                     | T down vs N                            | 31.42   | 17.6503   | 8.98815    | 1         |
| cg16316382  | PDE6C                                                                                                   | 5.71E-07          | 5.71E-07             | 0.212465           | -4.70666                     | T down vs N                            | 63.715  | 22.4725   | 5.64331    | 1         |
| cg16317553  | CLN8                                                                                                    | 0.0007989         | 0.000798901          | 3.42675            | 3.42675                      | T up vs N                              | 16.991  | 14.2073   | 13.3789    | 1         |
| cg16318688  | EPHX4                                                                                                   | 0.00109504        | 0.00109504           | 0.33181            | -3.01378                     | T down vs N                            | 15.775  | 11.399    | 11.5613    | 1         |
| cg16318728  | PTPN14                                                                                                  | 0.0002036         | 0.0002036            | 0.234338           | -4.26733                     | T down vs N                            | 22.869  | 19.7192   | 13.7962    | 1         |
| cg16319578  | HSPA2;HSPA2                                                                                             | 0.00167973        | 0.00167973           | 11.6456            | 11.6456                      | T up vs N                              | 14.204  | 56.4467   | 63.5843    | 1         |
| cg16320885  | LCE5A                                                                                                   | 1.71E-05          | 1.71E-05             | 0.280647           | -3.5632                      | T down vs N                            | 36.505  | 15.1223   | 6.6281     | 1         |
| cg16322479  | EXOC3;C5orf55                                                                                           | 2.04E-05          | 2.04E-05             | 0.248743           | -0.42458                     | T down vs N                            | 35.38   | 18.1594   | 8.21238    | 1         |
| cg16323245  | ZBTB20;ZBTB20                                                                                           | 0.00074702        | 0.000747022          | 0.280792           | -3.56135                     | T down vs N                            | 17.256  | 15.11     | 14.0103    | 1         |
| cg16323330  | MSI2;MSI2                                                                                               | 7.30E-05          | 7.30E-05             | 0.25089            | -3.98581                     | T down vs N                            | 28.008  | 17.9079   | 10.2302    | 1         |
| cg16325174  | FAM155A                                                                                                 | 0.00585058        | 0.00585058           | 0.258401           | -3.86995                     | T down vs N                            | 10.095  | 17.1519   | 27.1847    | 1         |
| cg16326123  | HDAC4                                                                                                   | 0.00496686        | 0.00496686           | 3.23679            | 3.23679                      | T up vs N                              | 10.596  | 12.922    | 19.5122    | 1         |
| cg16328369  | OR2W3                                                                                                   | 0.00023058        | 0.000230578          | 0.184808           | -5.41103                     | T down vs N                            | 22.291  | 26.7013   | 19.1661    | 1         |
| cg16330755  | C10orf32;C10orf32                                                                                       | 3.76E-05          | 3.76E-05             | 3.20721            | 3.20721                      | T up vs N                              | 31.692  | 12.7207   | 6.42213    | 1         |
| cg16331599  | CD86;CD86                                                                                               | 0.00024801        | 0.000248009          | 0.299699           | -3.33668                     | T down vs N                            | 21.956  | 13.5994   | 9.91034    | 1         |
| cg16331823  | FLOT1;IER3                                                                                              | 0.00028415        | 0.000284145          | 8.84056            | 8.84056                      | T up vs N                              | 21.34   | 44.4852   | 33.3542    | 1         |
| cg16332610  | CYP11A1;CYP11A1;CYP11A1                                                                                 | 0.00467932        | 0.00467932           | 4.59941            | 4.59941                      | T up vs N                              | 10.781  | 21.8087   | 32.3654    | 1         |
| cg16333262  | C14orf118;C14orf118                                                                                     | 0.00229742        | 0.00229742           | 0.285855           | -3.49828                     | T down vs N                            | 13.108  | 14.6878   | 17.9282    | 1         |
| cg16336556  | TBP1                                                                                                    | 0.00168928        | 0.00168928           | 0.330078           | -3.02959                     | T down vs N                            | 14.184  | 11.5073   | 12.9809    | 1         |
| cg16338313  | RG56                                                                                                    | 0.00054622        | 0.000546216          | 0.275695           | -3.6272                      | T down vs N                            | 18.524  | 15.5491   | 13.4308    | 1         |
| cg16340422  | PLD6                                                                                                    | 0.00014999        | 0.000149992          | 0.115424           | -8.66368                     | T down vs N                            | 24.33   | 43.6639   | 28.715     | 1         |
| cg16341261  | SLC30A5;SLC30A5                                                                                         | 6.49E-07          | 6.49E-07             | 0.127961           | -7.81489                     | T down vs N                            | 62.465  | 39.5932   | 10.1415    | 1         |
| cg16341836  | STAMBPL1                                                                                                | 0.00164887        | 0.00164887           | 0.238778           | -4.188                       | T down vs N                            | 14.27   | 19.2125   | 21.5413    | 1         |
| cg16342323  | SFTA3                                                                                                   | 0.00048664        | 0.000486638          | 0.244887           | -4.08352                     | T down vs N                            | 19.004  | 18.5407   | 15.6098    | 1         |
| cg16344511  | CD44;CD44;CD44;CD44;CD44                                                                                | 5.29E-06          | 5.29E-06             | 0.326653           | -3.06136                     | T down vs N                            | 44.622  | 11.725    | 4.20418    | 1         |
| cg16345647  | DSCR6                                                                                                   | 5.03E-06          | 5.03E-06             | 14.4514            | 14.4514                      | T up vs N                              | 44.998  | 66.8099   | 23.7559    | 1         |
| cg16345720  | C11orf85                                                                                                | 3.06E-07          | 3.06E-07             | 0.249765           | -4.00377                     | T down vs N                            | 70.1    | 18.0245   | 4.114      | 1         |
| cg16345915  | C17orf101;C17orf101                                                                                     | 7.75E-06          | 7.75E-06             | 0.332292           | -3.0094                      | T down vs N                            | 41.85   | 11.3689   | 4.34655    | 1         |
| cg16348158  | PRDM16;PRDM16                                                                                           | 0.00071289        | 0.000712894          | 0.311923           | -3.20592                     | T down vs N                            | 17.442  | 12.712    | 11.661     | 1         |
| cg16348164  | OR13A1                                                                                                  | 0.0026051         | 0.0026051            | 0.233907           | -4.2752                      | T down vs N                            | 12.681  | 19.7693   | 24.9436    | 1         |
| cg16348470  | C1orf94;C1orf94;C1orf94                                                                                 | 2.23E-05          | 2.23E-05             | 32.6982            | 32.6982                      | T up vs N                              | 34.822  | 113.906   | 52.3382    | 1         |
| cg16349827  | VWA3B                                                                                                   | 0.00179216        | 0.00179216           | 0.326069           | -3.06684                     | T down vs N                            | 13.974  | 11.7625   | 13.4683    | 1         |
| cg16351441  | SLC22A10;SLC22A10                                                                                       | 4.15E-05          | 4.15E-05             | 0.103142           | -9.69534                     | T down vs N                            | 31.13   | 48.3329   | 24.842     | 1         |
| cg16352283  | FAM46B                                                                                                  | 0.00092278        | 0.000922784          | 3.17156            | 3.17156                      | T up vs N                              | 16.429  | 12.4779   | 12.1522    | 1         |
| cg16353624  | C6orf150                                                                                                | 1.90E-07          | 1.90E-07             | 0.19242            | -5.19696                     | T down vs N                            | 75.338  | 25.4399   | 5.40283    | 1         |
| cg16353800  | ZADH2                                                                                                   | 2.72E-05          | 2.72E-05             | 0.204275           | -4.89536                     | T down vs N                            | 33.627  | 32.6276   | 11.2421    | 1         |
| cg16354520  | LCE2A                                                                                                   | 0.00011374        | 0.000113741          | 0.175827           | -5.68742                     | T down vs N                            | 25.702  | 28.3002   | 17.6177    | 1         |
| cg16355550  | H53ST4                                                                                                  | 0.00208164        | 0.00208164           | 0.263734           | -3.7917                      | T down vs N                            | 13.448  | 16.638    | 19.7947    | 1         |
| cg16357179  | KDFZp434L192                                                                                            | 5.48E-05          | 5.48E-05             | 0.219984           | -4.54579                     | T down vs N                            | 29.564  | 21.4748   | 11.6222    | 1         |
| cg16357719  | RNPS1;RNPS1                                                                                             | 0.00038219        | 0.000382191          | 4.47782            | 4.47782                      | T up vs N                              | 20.033  | 21.0496   | 16.812     | 1         |
| cg16358350  | ACBD6                                                                                                   | 3.50E-08          | 3.50E-08             | 0.241789           | -4.13584                     | T down vs N                            | 96.583  | 18.8777   | 3.12728    | 1         |
| cg16359034  | LOC100128788;LOC100128788                                                                               | 0.00016495        | 0.000164953          | 0.187315           | -5.33859                     | T down vs N                            | 23.869  | 26.2767   | 17.6139    | 1         |
| cg16360836  | HDAC4                                                                                                   | 0.00015863        | 0.000158625          | 0.304801           | -3.28083                     | T down vs N                            | 24.058  | 13.221    | 8.79283    | 1         |
| cg16363970  | CCDC144C                                                                                                | 4.39E-05          | 4.39E-05             | 3.55523            | 3.55523                      | T up vs N                              | 30.806  | 15.0691   | 7.82655    | 1         |
| cg16364506  | XPR1;XPR1                                                                                               | 0.00029694        | 0.00029694           | 0.223442           | -4.47543                     | T down vs N                            | 21.142  | 21.0346   | 15.9185    | 1         |
| cg16365728  | LYZL6                                                                                                   | 1.76E-05          | 1.76E-05             | 0.168031           | -5.95128                     | T down vs N                            | 36.331  | 29.7961   | 13.1222    | 1         |
| cg16368146  | HCG9                                                                                                    | 2.52E-05          | 2.52E-05             | 4.66444            | 4.66444                      | T up vs N                              | 34.072  | 22.2118   | 10.4306    | 1         |
| cg16369400  | RNF71                                                                                                   | 1.28E-06          | 1.28E-06             | 0.213176           | -4.69096                     | T down vs N                            | 56.142  | 22.3757   | 6.37689    | 1         |
| cg16373526  | CTTN;CTTN                                                                                               | 0.00012715        | 0.000127146          | 0.227289           | -4.39968                     | T down vs N                            | 25.143  | 20.5582   | 13.0822    | 1         |
| cg16373998  | RPL5                                                                                                    | 4.00E-05          | 4.00E-05             | 0.333266           | -3.00061                     | T down vs N                            | 31.34   | 11.3087   | 5.77344    | 1         |
| cg16374999  | PRPH;PRPH                                                                                               | 1.63E-05          | 1.63E-05             | 16.8326            | 16.8326                      | T up vs N                              | 36.808  | 74.6587   | 32.4531    | 1         |
| cg16376379  | GIP                                                                                                     | 1.86E-05          | 1.86E-05             | 0.156519           | -6.389                       | T down vs N                            | 35.965  | 32.2145   | 14.3316    | 1         |
| cg16376447  | ISCA1L                                                                                                  | 1.98E-05          | 1.98E-05             | 0.333329           | -3.00004                     | T down vs N                            | 35.588  | 11.3047   | 5.08244    | 1         |
| cg16379513  | LOC100128071;TSSK3                                                                                      | 7.85E-07          | 7.85E-07             | 4.38398            | 4.38398                      | T up vs N                              | 60.645  | 20.459    | 5.39774    | 1         |
| cg16383318  | ZNF766;MIR643                                                                                           | 0.00015921        | 0.00015921           | 0.233828           | -4.27664                     | T down vs N                            | 24.04   | 19.7785   | 13.1637    | 1         |
| cg16384864  | SPATA21                                                                                                 | 2.38E-06          | 2.38E-06             | 0.30112            | -3.32093                     | T down vs N                            | 50.858  | 13.4928   | 4.24482    | 1         |

| Probeset ID | UCSC_REFGENE_NAME                         | p-value<br>(Type) | p-value (T vs.<br>N) | Ratio (T<br>vs. N) | Fold-<br>Change (T<br>vs. N) | Fold-Change (T vs.<br>N) (Description) | F(Type) | SS (Type) | SS (Error) | F (Error) |
|-------------|-------------------------------------------|-------------------|----------------------|--------------------|------------------------------|----------------------------------------|---------|-----------|------------|-----------|
| cg16385335  | IL18BP;IL18BP;IL18BP;IL18BP;IL18BP;IL18BP | 1.24E-06          | 1.24E-06             | 0.231882           | -4.31254                     | T down vs N                            | 56.43   | 20.0067   | 5.67269    | 1         |
| cg16385583  | C1orf150                                  | 4.18E-05          | 4.18E-05             | 0.149793           | -6.67587                     | T down vs N                            | 31.085  | 33.7584   | 17.376     | 1         |
| cg16386396  | PRDM16;PRDM16                             | 0.00376146        | 0.00376146           | 0.188509           | -5.30478                     | T down vs N                            | 11.472  | 26.0778   | 36.3701    | 1         |
| cg16386523  | OR4C13                                    | 1.99E-05          | 1.99E-05             | 0.329698           | -3.03308                     | T down vs N                            | 35.531  | 11.5313   | 5.19268    | 1         |
| cg16386697  | CPT1B;CPT1B;CPT1B;CPT1B;CHKB-             | 0.00046592        | 0.000465921          | 3.15741            | 3.15741                      | T up vs N                              | 19.187  | 12.3814   | 10.3248    | 1         |
| cg16386781  | PPRC1                                     | 0.00186542        | 0.00186542           | 0.212172           | -4.71316                     | T down vs N                            | 13.832  | 22.5126   | 26.0411    | 1         |
| cg16387046  | MUCL1                                     | 0.00012011        | 0.000120108          | 0.259813           | -3.84893                     | T down vs N                            | 25.428  | 17.0141   | 10.7059    | 1         |
| cg16391973  | UBLCP1                                    | 2.18E-05          | 2.18E-05             | 0.245569           | -4.07217                     | T down vs N                            | 34.972  | 18.4674   | 8.44889    | 1         |
| cg16392754  | RPL26L1                                   | 0.00045661        | 0.000456605          | 0.246618           | -4.05485                     | T down vs N                            | 19.272  | 18.3554   | 15.2388    | 1         |
| cg16395183  | HHAT;HHAT;HHAT;HHAT;HHAT;HHAT             | 5.05E-05          | 5.05E-05             | 0.315364           | -3.17094                     | T down vs N                            | 30.02   | 12.4737   | 6.64814    | 1         |
| cg16396284  | B3GALT4                                   | 0.0023436         | 0.0023436            | 3.86939            | 3.86939                      | T up vs N                              | 13.04   | 17.1482   | 21.0407    | 1         |
| cg16396488  | PLA2G1B                                   | 5.02E-05          | 5.02E-05             | 0.259992           | -3.84627                     | T down vs N                            | 30.052  | 16.9967   | 9.04912    | 1         |
| cg16396919  | LOC400043                                 | 0.00032373        | 0.000323726          | 5.267172           | -3.89541                     | T down vs N                            | 20.759  | 17.3185   | 13.3485    | 1         |
| cg16397884  | CCNI2                                     | 1.27E-05          | 1.27E-05             | 15.289             | 15.289                       | T up vs N                              | 38.444  | 69.6586   | 28.9916    | 1         |
| cg16398133  | KCNK3                                     | 0.00073612        | 0.000736117          | 0.291145           | -3.43471                     | T down vs N                            | 17.314  | 14.2608   | 13.1784    | 1         |
| cg16398362  | TEX14;RAD51C;TEX14;RAD51C                 | 0.00011155        | 0.000111553          | 0.212043           | -4.71603                     | T down vs N                            | 25.8    | 22.5303   | 13.9724    | 1         |
| cg16406967  | HOXA3;HOXA3;HOXA3                         | 0.00098684        | 0.000986841          | 5.63778            | 5.63778                      | T up vs N                              | 16.171  | 28.0155   | 27.7195    | 1         |
| cg16407924  | TPO;TPO;TPO;TPO                           | 0.00160169        | 0.00160169           | 0.270025           | -3.70337                     | T down vs N                            | 14.374  | 16.0547   | 17.8704    | 1         |
| cg16408784  | ZNF259                                    | 0.00245544        | 0.00245544           | 0.277248           | -3.60687                     | T down vs N                            | 12.881  | 15.4137   | 19.1457    | 1         |
| cg16408865  | YEATS4                                    | 4.75E-06          | 4.75E-06             | 0.11033            | -9.06373                     | T down vs N                            | 45.423  | 45.5088   | 16.0301    | 1         |
| cg16409409  | C1orf106                                  | 3.76E-05          | 3.76E-05             | 0.207184           | -4.82662                     | T down vs N                            | 31.707  | 23.2088   | 11.7118    | 1         |
| cg16410524  | RCSL1                                     | 2.46E-06          | 2.46E-06             | 8.90509            | 8.90509                      | T up vs N                              | 50.586  | 44.7826   | 14.1646    | 1         |
| cg16410962  | GABRE                                     | 0.00286477        | 0.00286477           | 0.283645           | -3.52554                     | T down vs N                            | 12.363  | 14.8705   | 19.2458    | 1         |
| cg16411883  | EFNA5                                     | 8.97E-05          | 8.97E-05             | 0.302546           | -3.30528                     | T down vs N                            | 26.921  | 13.3868   | 7.95612    | 1         |
| cg16412609  | CSDAP1                                    | 3.64E-05          | 3.64E-05             | 3.06483            | 3.06483                      | T up vs N                              | 31.882  | 11.7487   | 5.89617    | 1         |
| cg16413763  | MYO10                                     | 8.04E-05          | 8.04E-05             | 0.204017           | -4.90154                     | T down vs N                            | 27.494  | 23.6652   | 13.7719    | 1         |
| cg16414403  | DSN1;DSN1;DSN1;DSN1;DSN1                  | 0.00017574        | 0.000175738          | 0.156226           | -6.40098                     | T down vs N                            | 23.565  | 32.2796   | 21.9167    | 1         |
| cg16415834  | GPR143;GPR143                             | 0.00360668        | 0.00360668           | 3.7511             | 3.7511                       | T up vs N                              | 11.608  | 16.3703   | 22.5652    | 1         |
| cg16417028  | IL24;IL24;IL24;IL24                       | 7.84E-07          | 7.84E-07             | 0.283036           | -3.53312                     | T down vs N                            | 60.661  | 14.9212   | 3.93566    | 1         |
| cg16417831  | TCP10L                                    | 8.83E-07          | 8.83E-07             | 0.279675           | -3.57558                     | T down vs N                            | 59.538  | 15.2051   | 4.08613    | 1         |
| cg16418329  | C4orf35;C4orf35                           | 0.00051922        | 0.000519224          | 0.220862           | -4.52771                     | T down vs N                            | 18.734  | 21.3619   | 18.2449    | 1         |
| cg16419054  | PACS2;PACS2                               | 3.05E-05          | 3.05E-05             | 3.23253            | 3.23253                      | T up vs N                              | 32.932  | 12.893    | 6.26409    | 1         |
| cg16419354  | FAM163A                                   | 0.00020819        | 0.00020819           | 14.1063            | 14.1063                      | T up vs N                              | 22.765  | 65.6062   | 46.1107    | 1         |
| cg16420520  | NTSDC1                                    | 2.37E-05          | 2.37E-05             | 0.127324           | -7.85395                     | T down vs N                            | 34.461  | 39.7855   | 18.4722    | 1         |
| cg16422816  | LOC100128239                              | 2.84E-05          | 2.84E-05             | 0.253392           | -3.94645                     | T down vs N                            | 33.366  | 17.6517   | 8.46459    | 1         |
| cg16425726  | SCD5;SCD5                                 | 0.00045029        | 0.000450292          | 6.34171            | 6.34171                      | T up vs N                              | 19.331  | 31.9569   | 26.4501    | 1         |
| cg16427899  | TMPRSS11E                                 | 4.86E-07          | 4.86E-07             | 0.250282           | -3.54507                     | T down vs N                            | 65.319  | 15.0012   | 3.67458    | 1         |
| cg16428357  | FER1L4                                    | 0.00302066        | 0.00302066           | 4.09366            | 4.09366                      | T up vs N                              | 12.187  | 18.6061   | 24.4278    | 1         |
| cg16429208  | LOC148824                                 | 4.84E-05          | 4.84E-05             | 0.159178           | -6.28226                     | T down vs N                            | 30.251  | 31.6319   | 16.7301    | 1         |
| cg16430687  | PROCR                                     | 0.00010322        | 0.000103222          | 4.22861            | 4.22861                      | T up vs N                              | 26.195  | 19.4722   | 11.8939    | 1         |
| cg16431978  | KRTAP13-3                                 | 0.00010812        | 0.000108117          | 0.250629           | -3.98997                     | T down vs N                            | 25.958  | 17.9349   | 11.0545    | 1         |
| cg16432350  | KRT80;KRT80;KRT80;KRT80                   | 4.86E-05          | 4.86E-05             | 0.086183           | -11.6032                     | T down vs N                            | 30.233  | 56.279    | 29.7841    | 1         |
| cg16433074  | APBB2;APBB2;APBB2                         | 0.00315535        | 0.00315535           | 0.254017           | -3.93675                     | T down vs N                            | 12.043  | 17.5885   | 23.3675    | 1         |
| cg16435779  | GRHL2                                     | 0.00012261        | 0.000122605          | 7.51368            | 7.51368                      | T up vs N                              | 25.325  | 38.0939   | 24.0675    | 1         |
| cg16435923  | PCDHGA4;PCDHGA2;PCDHGA5;PCDHG             |                   |                      |                    |                              |                                        |         |           |            |           |
| cg16436762  | B2;PCDHGA1;PCDHGB1;PCDHGA3;PC             |                   |                      |                    |                              |                                        |         |           |            |           |
| cg16437048  | DHGA5                                     | 4.38E-05          | 4.38E-05             | 4.35164            | 4.35164                      | T up vs N                              | 30.826  | 20.2545   | 10.513     | 1         |
| cg16437672  | PIWIL4                                    | 1.11E-05          | 1.11E-05             | 0.213633           | -4.68092                     | T down vs N                            | 39.359  | 22.3137   | 9.07079    | 1         |
| cg16438182  | GPC5                                      | 7.01E-06          | 7.01E-06             | 0.253825           | -3.93971                     | T down vs N                            | 42.563  | 17.6078   | 6.61909    | 1         |
| cg16438688  | RPTOR;RPTOR                               | 6.72E-05          | 6.72E-05             | 0.190857           | -5.23954                     | T down vs N                            | 28.449  | 25.6924   | 14.4497    | 1         |
| cg16441044  | NTRK1;INSRR                               | 6.68E-06          | 6.68E-06             | 7.35172            | 7.35172                      | T up vs N                              | 42.908  | 37.2751   | 13.8995    | 1         |
| cg16444641  | LPO;LPO;LPO                               | 0.00478962        | 0.00478962           | 0.267184           | -3.74274                     | T down vs N                            | 10.709  | 16.3151   | 24.3766    | 1         |
| cg16444909  | HPCAL1;HPCAL1                             | 1.59E-05          | 1.59E-05             | 0.208323           | -4.80023                     | T down vs N                            | 36.986  | 23.0474   | 9.97015    | 1         |
| cg16446484  | ATP6V1G2;NFKBIL1;NFKBIL1;ATP6V1G          |                   |                      |                    |                              |                                        |         |           |            |           |
| cg16446783  | 2                                         | 0.00205752        | 0.00205752           | 0.29397            | -3.40171                     | T down vs N                            | 13.489  | 14.0385   | 16.6519    | 1         |
| cg16447680  | CSDAP1                                    | 9.97E-05          | 9.97E-05             | 0.210492           | -4.75077                     | T down vs N                            | 26.372  | 22.744    | 13.7988    | 1         |
| cg16451371  | MRGPRX4                                   | 4.76E-05          | 4.76E-05             | 0.201483           | -4.96319                     | T down vs N                            | 30.346  | 24.0388   | 12.6745    | 1         |
| cg16452086  | KIAA0748                                  | 1.04E-06          | 1.04E-06             | 0.175249           | -5.70618                     | T down vs N                            | 58.025  | 28.4075   | 7.83325    | 1         |
| cg16456252  | BPIL2                                     | 1.23E-05          | 1.23E-05             | 0.246864           | -4.05081                     | T down vs N                            | 38.687  | 18.3293   | 7.58047    | 1         |
| cg16459265  | NFATC1;NFATC1;NFATC1;NFATC1;NFA           |                   |                      |                    |                              |                                        |         |           |            |           |
| cg16459349  | TC1                                       | 0.0002412         | 0.000241202          | 9.77152            | 9.77152                      | T up vs N                              | 22.083  | 48.6665   | 35.2603    | 1         |
| cg16460383  | GPX6;GPX6                                 | 0.00076152        | 0.00076152           | 0.294173           | -3.39936                     | T down vs N                            | 17.18   | 14.0227   | 13.0598    | 1         |
| cg16462183  | C7orf40;SNORA9                            | 0.00020586        | 0.000205858          | 0.214647           | -4.65881                     | T down vs N                            | 22.818  | 22.177    | 15.5509    | 1         |
| cg16468729  | PRKCDPB;PRKCDPB                           | 0.0001357         | 0.000135695          | 7.82133            | 7.82133                      | T up vs N                              | 24.821  | 39.6249   | 25.543     | 1         |
| cg16468773  | NXN                                       | 6.15E-05          | 6.15E-05             | 0.286277           | -3.49313                     | T down vs N                            | 28.927  | 14.6533   | 8.10513    | 1         |
| cg16469740  | ESM1;ESM1                                 | 1.82E-06          | 1.82E-06             | 0.232806           | -4.29542                     | T down vs N                            | 53.085  | 19.8979   | 5.99726    | 1         |
|             | IL8                                       | 0.00050066        | 0.000500657          | 0.154228           | -6.48391                     | T down vs N                            | 18.885  | 32.7288   | 27.7286    | 1         |
|             | CHMP4C                                    | 0.00056382        | 0.000563818          | 4.26561            | 4.26561                      | T up vs N                              | 18.393  | 19.7082   | 17.1444    | 1         |
|             | HDAC9;HDAC9                               | 2.58E-05          | 2.58E-05             | 0.251599           | -3.97458                     | T down vs N                            | 33.948  | 17.8348   | 8.40563    | 1         |

| Probeset ID | UCSC_REFGENE_NAME    | p-value<br>(Type) | p-value (T vs.<br>N) | Ratio (T<br>vs. N) | Fold-<br>Change (T<br>vs. N) | Fold-Change (T vs.<br>N) (Description) | F(Type) | SS (Type) | SS (Error) | F (Error) |
|-------------|----------------------|-------------------|----------------------|--------------------|------------------------------|----------------------------------------|---------|-----------|------------|-----------|
| cg16471362  | SPINLW1;SPINLW1      | 0.00160109        | 0.00160109           | 0.303163           | -3.29855                     | T down vs N                            | 14.376  | 13.3412   | 14.8486    | 1         |
| cg16474701  | CHRNA2               | 9.39E-05          | 9.39E-05             | 0.2991             | -3.34336                     | T down vs N                            | 27.796  | 12.8419   | 6.93011    | 1         |
| cg16476048  | C10orf122            | 3.20E-05          | 3.20E-05             | 0.324492           | -3.08174                     | T down vs N                            | 32.638  | 11.8645   | 5.81631    | 1         |
| cg16481618  | APOH                 | 1.72E-05          | 1.72E-05             | 0.253177           | -3.94981                     | T down vs N                            | 36.48   | 17.6736   | 7.75161    | 1         |
| cg16482344  | LOC84856             | 0.00048238        | 0.00048238           | 0.263804           | -3.79069                     | T down vs N                            | 19.041  | 16.6314   | 13.9752    | 1         |
| cg16483466  | C20orf186            | 0.00083955        | 0.000839545          | 0.277535           | -3.60315                     | T down vs N                            | 16.796  | 15.3889   | 14.6595    | 1         |
| cg16485893  | NRG4                 | 4.85E-06          | 4.85E-06             | 0.154725           | -6.4631                      | T down vs N                            | 45.264  | 32.6164   | 11.5294    | 1         |
| cg16488544  | PTPN14               | 4.78E-06          | 4.78E-06             | 0.262586           | -3.80828                     | T down vs N                            | 45.377  | 16.7471   | 5.90501    | 1         |
| cg16489193  | VPS52;RPS18          | 0.00352279        | 0.00352279           | 0.255366           | -3.91596                     | T down vs N                            | 11.949  | 16.4261   | 20.6202    | 1         |
| cg16489809  | TCTN3;TCTN3          | 6.76E-06          | 6.76E-06             | 0.14919            | -6.70288                     | T down vs N                            | 42.823  | 33.9022   | 12.667     | 1         |
| cg16493531  | FLOT1;IER3           | 0.00072645        | 0.000726451          | 8.52656            | 8.52656                      | T up vs N                              | 17.367  | 43.0211   | 39.6351    | 1         |
| cg16497413  | MMAB                 | 0.00029101        | 0.000291008          | 0.330066           | -3.02969                     | T down vs N                            | 21.233  | 11.5081   | 8.67204    | 1         |
| cg16497714  | C11orf40             | 6.18E-05          | 6.18E-05             | 0.152032           | -6.57756                     | T down vs N                            | 28.904  | 33.2329   | 18.3965    | 1         |
| cg16498194  | FZD10                | 7.69E-05          | 7.69E-05             | 9.99129            | 9.99129                      | T up vs N                              | 27.73   | 49.6209   | 28.6306    | 1         |
| cg16498359  | SLC29A4;SLC29A4      | 0.00043615        | 0.000436147          | 0.281007           | -3.55863                     | T down vs N                            | 19.467  | 15.0919   | 12.4043    | 1         |
| cg16499645  | VPS28;NFKBIL2;VPS28  | 0.0066828         | 0.0066828            | 0.330066           | -3.01267                     | T down vs N                            | 9.6962  | 11.3914   | 18.7973    | 1         |
| cg16500497  | GRN                  | 0.00056585        | 0.000565847          | 0.284326           | -3.51709                     | T down vs N                            | 18.378  | 14.8139   | 12.8971    | 1         |
| cg16501308  | KLHL14               | 3.61E-05          | 3.61E-05             | 14.0431            | 14.0431                      | T up vs N                              | 31.934  | 65.3837   | 32.7598    | 1         |
| cg16501892  | LOXHD1;LOXHD1        | 0.00021559        | 0.00021559           | 0.323363           | -3.0925                      | T down vs N                            | 22.602  | 11.9381   | 8.45104    | 1         |
| cg16504397  | LIN7C                | 0.00304765        | 0.00304765           | 0.30414            | -3.28796                     | T down vs N                            | 12.157  | 13.2694   | 17.4634    | 1         |
| cg16505623  | C2orf3               | 7.00E-05          | 7.00E-05             | 0.201668           | -4.95866                     | T down vs N                            | 29.456  | 22.599    | 11.5081    | 1         |
| cg16506432  | CDC20B;CDC20B;CDC20B | 0.00049168        | 0.000491683          | 0.294423           | -3.39648                     | T down vs N                            | 18.961  | 14.0033   | 11.8165    | 1         |
| cg16507955  | HLA-E                | 0.00024687        | 0.000246873          | 0.329455           | -3.03531                     | T down vs N                            | 21.977  | 11.5466   | 8.40637    | 1         |
| cg16508529  | ODZ3                 | 0.00011421        | 0.000114209          | 0.272661           | -3.66756                     | T down vs N                            | 25.681  | 15.8173   | 9.85463    | 1         |
| cg16511229  | MEST;MEST            | 1.23E-05          | 1.23E-05             | 13.2739            | 13.2739                      | T up vs N                              | 38.672  | 62.6254   | 25.9104    | 1         |
| cg16512311  | CDH13                | 0.00120264        | 0.00120264           | 0.319585           | -3.12906                     | T down vs N                            | 15.424  | 12.1879   | 12.6434    | 1         |
| cg16515381  | FAM195B;FAM195B      | 0.00415484        | 0.00415484           | 0.28807            | -3.47138                     | T down vs N                            | 11.155  | 14.5074   | 20.8086    | 1         |
| cg16516584  | OR6S1                | 0.001192          | 0.001192             | 0.289724           | -3.45156                     | T down vs N                            | 15.457  | 14.3741   | 14.8794    | 1         |
| cg16516712  | SHANK2               | 3.09E-06          | 3.09E-06             | 4.07624            | 4.07624                      | T up vs N                              | 48.76   | 18.4937   | 6.06848    | 1         |
| cg16517394  | TNFSF4;TNFSF4        | 0.00371725        | 0.00371725           | 0.315621           | -3.16836                     | T down vs N                            | 11.51   | 12.4561   | 17.3149    | 1         |
| cg16522370  | TGIF2LX              | 0.00216313        | 0.00216313           | 0.196286           | -5.09461                     | T down vs N                            | 13.315  | 24.8295   | 29.8355    | 1         |
| cg16524005  | KLHDC8A              | 6.55E-06          | 6.55E-06             | 0.162698           | -6.14637                     | T down vs N                            | 43.05   | 30.8836   | 11.4783    | 1         |
| cg16527112  | RELN;RELN            | 0.00019123        | 0.00019123           | 0.257889           | -3.87764                     | T down vs N                            | 23.164  | 17.2022   | 11.882     | 1         |
| cg16527477  | MPP7                 | 3.86E-05          | 3.86E-05             | 0.180813           | -5.53059                     | T down vs N                            | 31.554  | 27.397    | 13.8922    | 1         |
| cg16529229  | RING1                | 0.00059203        | 0.000592026          | 0.277995           | -3.59719                     | T down vs N                            | 18.193  | 15.3492   | 13.4994    | 1         |
| cg16531955  | FRS2;FRS2            | 0.00254124        | 0.00254124           | 0.293952           | -3.40192                     | T down vs N                            | 12.765  | 14.0399   | 17.5984    | 1         |
| cg16532262  | KRT3                 | 9.74E-06          | 9.74E-06             | 0.267926           | -3.73237                     | T down vs N                            | 40.25   | 16.2466   | 6.45829    | 1         |
| cg16532606  | PRR15L               | 1.88E-05          | 1.88E-05             | 0.238796           | -4.18767                     | T down vs N                            | 35.916  | 19.2104   | 8.55784    | 1         |
| cg16535018  | C17orf96;C17orf96    | 1.46E-05          | 1.46E-05             | 0.322399           | -3.10174                     | T down vs N                            | 37.542  | 12.0013   | 5.11487    | 1         |
| cg16535352  | CPA4;CPA4            | 0.00012081        | 0.000120812          | 0.32205            | -3.10511                     | T down vs N                            | 25.398  | 12.0243   | 7.5748     | 1         |
| cg16536964  | MSR1;MSR1;MSR1       | 0.00014592        | 0.000145921          | 0.222433           | -4.49575                     | T down vs N                            | 24.464  | 21.1619   | 13.8405    | 1         |
| cg16538674  | C6orf10              | 3.96E-05          | 3.96E-05             | 0.300303           | -3.32997                     | T down vs N                            | 31.398  | 13.554    | 6.90695    | 1         |
| cg16539721  | MME;MME;MME;MME      | 0.00119448        | 0.00119448           | 0.252511           | -3.96022                     | T down vs N                            | 15.449  | 17.7414   | 18.3742    | 1         |
| cg16540391  | PLEKHG1              | 0.00402986        | 0.00402986           | 0.286              | -3.4965                      | T down vs N                            | 11.252  | 14.6759   | 20.8689    | 1         |
| cg16547579  | SLC23A2;SLC23A2      | 0.00070708        | 0.000707082          | 0.236654           | -4.22557                     | T down vs N                            | 17.475  | 19.4528   | 17.8113    | 1         |
| cg16548605  | SLC19A2              | 8.50E-05          | 8.50E-05             | 0.21819            | -4.58316                     | T down vs N                            | 27.197  | 21.7076   | 12.7707    | 1         |
| cg16548780  | KIAA0895L;EXOC3L     | 0.00010948        | 0.000109482          | 10.2483            | 10.2483                      | T up vs N                              | 25.895  | 50.7219   | 31.3403    | 1         |
| cg16548911  | ADCY7                | 0.00079865        | 0.000798653          | 3.14673            | 3.14673                      | T up vs N                              | 16.992  | 12.3086   | 11.5901    | 1         |
| cg16549043  | MEX3A                | 2.34E-05          | 2.34E-05             | 0.268644           | -3.7224                      | T down vs N                            | 34.542  | 16.1806   | 7.49493    | 1         |
| cg16549644  | ARL16;HGS            | 1.50E-05          | 1.50E-05             | 0.12057            | -8.29391                     | T down vs N                            | 37.376  | 41.9176   | 17.9443    | 1         |
| cg16550010  | GIF                  | 4.50E-05          | 4.50E-05             | 0.160249           | -6.24029                     | T down vs N                            | 30.664  | 31.4015   | 16.385     | 1         |
| cg16551220  | GPR137C              | 0.00036396        | 0.000363955          | 0.306129           | -3.2666                      | T down vs N                            | 20.245  | 13.1245   | 10.3725    | 1         |
| cg1655188   | LOC285692            | 6.20E-05          | 6.20E-05             | 0.271522           | -3.68294                     | T down vs N                            | 28.886  | 15.9193   | 8.81781    | 1         |
| cg16555194  | PTPN3;PTPN3          | 0.00051865        | 0.00051865           | 4.532              | 4.532                        | T up vs N                              | 18.738  | 21.3887   | 18.2633    | 1         |
| cg16555856  | TIGD3                | 0.00020544        | 0.000205437          | 6.21783            | 6.21783                      | T up vs N                              | 22.827  | 31.278    | 21.9234    | 1         |
| cg16556145  | CLDN10;CLDN10;CLDN10 | 0.00360684        | 0.00360684           | 20.6576            | 20.6576                      | T up vs N                              | 11.607  | 85.8811   | 118.382    | 1         |
| cg16558530  | ABT1                 | 1.86E-05          | 1.86E-05             | 0.240943           | -4.15035                     | T down vs N                            | 35.979  | 18.971    | 8.43645    | 1         |
| cg16559708  | CAMTA1               | 0.00154182        | 0.00154182           | 0.242021           | -4.13188                     | T down vs N                            | 14.512  | 18.8522   | 20.7858    | 1         |
| cg16560824  | DENND3               | 0.00059211        | 0.000592107          | 0.198818           | -5.02972                     | T down vs N                            | 18.192  | 24.4401   | 21.4953    | 1         |
| cg16562724  | ESRP2                | 0.00020337        | 0.000203373          | 3.77644            | 3.77644                      | T up vs N                              | 22.874  | 16.5375   | 11.5675    | 1         |
| cg16564534  | MRPL11;MRPL11;MRPL11 | 0.00013923        | 0.00013923           | 0.273837           | -3.6518                      | T down vs N                            | 24.694  | 15.7126   | 10.1807    | 1         |
| cg16565901  | RPTOR;RPTOR          | 0.00378984        | 0.00378984           | 0.232542           | -4.30029                     | T down vs N                            | 11.448  | 19.9289   | 27.8529    | 1         |
| cg16565913  | RBM47                | 3.17E-05          | 3.17E-05             | 9.43076            | 9.43076                      | T up vs N                              | 32.697  | 47.1627   | 23.0789    | 1         |
| cg16568467  | IBSP                 | 0.00025518        | 0.000255179          | 0.267119           | -3.74366                     | T down vs N                            | 21.826  | 16.3211   | 11.9646    | 1         |
| cg16574643  | TERT;TERT            | 6.86E-07          | 6.86E-07             | 0.251637           | -3.97399                     | T down vs N                            | 61.926  | 17.831    | 4.60707    | 1         |
| cg16578636  | PCGF5                | 0.00011714        | 0.000117144          | 0.242696           | -4.12038                     | T down vs N                            | 25.553  | 18.7782   | 11.7579    | 1         |
| cg16580728  | TMEM74               | 0.00040395        | 0.000403953          | 0.25518            | -3.9188                      | T down vs N                            | 19.794  | 17.4713   | 14.1223    | 1         |
| cg16582419  | RNF39;RNF39          | 0.00308449        | 0.00308449           | 3.24812            | 3.24812                      | T up vs N                              | 12.118  | 12.9989   | 17.1634    | 1         |
| cg16582517  | BHLHE40              | 5.51E-05          | 5.51E-05             | 0.247769           | -4.03602                     | T down vs N                            | 29.536  | 18.2336   | 9.87733    | 1         |
| cg16583552  | PCDH87               | 0.00201241        | 0.00201241           | 3.49477            | 3.49477                      | T up vs N                              | 13.566  | 14.6643   | 17.2951    | 1         |
| cg16583884  | CCDC68;CCDC68        | 1.40E-06          | 1.40E-06             | 0.25729            | -3.88666                     | T down vs N                            | 55.391  | 17.2613   | 4.98601    | 1         |
| cg16586023  | TLE2;TLE2;TLE2       | 4.87E-05          | 4.87E-05             | 0.186337           | -5.36661                     | T down vs N                            | 30.22   | 26.4412   | 13.9994    | 1         |

| Probeset ID | UCSC_REFGENE_NAME                                           | p-value<br>(Type) | p-value (T vs.<br>N) | Ratio (T<br>vs. N) | Fold-<br>Change (T<br>vs. N) | Fold-Change (T vs.<br>N) (Description) | F(Type) | SS (Type) | SS (Error) | F (Error) |
|-------------|-------------------------------------------------------------|-------------------|----------------------|--------------------|------------------------------|----------------------------------------|---------|-----------|------------|-----------|
| cg16586406  | TPM3                                                        | 0.00032425        | 0.000324252          | 0.277599           | -3.60231                     | T down vs N                            | 20.751  | 15.3833   | 11.861     | 1         |
| cg16587174  | HSPA1L                                                      | 0.00023009        | 0.000230086          | 0.269415           | -3.71175                     | T down vs N                            | 22.3    | 16.1102   | 11.5587    | 1         |
| cg16587707  | SLC22A18A5;SLC22A18<br>IL1RAP;IL1RAP;IL1RAP;IL1RAP;IL1RAP;I | 7.04E-06          | 7.04E-06             | 0.175987           | -5.68223                     | T down vs N                            | 42.537  | 28.2705   | 10.6338    | 1         |
| cg16588163  | L1RAP                                                       | 3.07E-05          | 3.07E-05             | 0.192358           | -5.19863                     | T down vs N                            | 32.894  | 25.4498   | 12.3791    | 1         |
| cg16591182  | ZFHx4                                                       | 0.00503651        | 0.00503651           | 0.270529           | -3.69647                     | T down vs N                            | 10.553  | 16.009    | 24.2722    | 1         |
| cg16592658  | EBI3                                                        | 0.00161066        | 0.00161066           | 0.284867           | -3.51041                     | T down vs N                            | 14.354  | 14.7692   | 16.4624    | 1         |
| cg16593812  | OR2L1P;OR2L13                                               | 0.00018136        | 0.000181356          | 0.261933           | -3.81778                     | T down vs N                            | 23.415  | 16.8095   | 11.4861    | 1         |
| cg16593917  | HPDL                                                        | 2.34E-06          | 2.34E-06             | 5.0498             | 5.0498                       | T up vs N                              | 51.001  | 24.5608   | 7.70517    | 1         |
| cg16594007  | USP29                                                       | 0.00061295        | 0.000612953          | 0.264122           | -3.78614                     | T down vs N                            | 18.051  | 16.6013   | 14.7152    | 1         |
| cg16596691  | SNRPA                                                       | 0.00041934        | 0.00041934           | 0.253961           | -3.93761                     | T down vs N                            | 19.634  | 17.5941   | 14.3375    | 1         |
| cg16596889  | C1orf92                                                     | 2.40E-05          | 2.40E-05             | 0.275817           | -3.62559                     | T down vs N                            | 34.37   | 15.5383   | 7.23348    | 1         |
| cg16599143  | FMO3;FMO3                                                   | 0.0001905         | 0.000190504          | 0.195822           | -5.10668                     | T down vs N                            | 23.182  | 24.9017   | 17.1869    | 1         |
| cg16600501  | SLC1A6                                                      | 0.00090183        | 0.000901825          | 0.136712           | -7.31467                     | T down vs N                            | 16.518  | 37.0865   | 35.9242    | 1         |
| cg16600634  | FLJ42709;FLJ42709;FLJ42709                                  | 0.00570712        | 0.00570712           | 3.30151            | 3.30151                      | T up vs N                              | 10.17   | 13.3612   | 21.0201    | 1         |
| cg16601385  | CFD                                                         | 0.00019891        | 0.000198906          | 0.23215            | -4.30756                     | T down vs N                            | 22.979  | 19.9751   | 13.9087    | 1         |
| cg16603012  | APRT;APRT                                                   | 3.72E-06          | 3.72E-06             | 0.149548           | -6.68684                     | T down vs N                            | 47.304  | 33.8169   | 11.4381    | 1         |
| cg16604126  | ORS1E1                                                      | 0.0050626         | 0.0050626            | 0.313544           | -3.18934                     | T down vs N                            | 10.537  | 12.5991   | 19.1311    | 1         |
| cg16604658  | TBK1                                                        | 9.26E-06          | 9.26E-06             | 0.25579            | -3.90946                     | T down vs N                            | 40.597  | 17.4104   | 6.8617     | 1         |
| cg16606347  | EBF3<br>PCDHA2;PCDHA1;PCDHA3;PCDHA3;PC                      | 0.00148665        | 0.00148665           | 0.251244           | -3.9802                      | T down vs N                            | 14.644  | 17.8714   | 19.5268    | 1         |
| cg16607685  | DHA1                                                        | 0.0010791         | 0.0010791            | 3.30507            | 3.30507                      | T up vs N                              | 15.831  | 13.3853   | 13.5284    | 1         |
| cg16612998  | LRP4                                                        | 0.00042785        | 0.000427848          | 0.300066           | -3.3326                      | T down vs N                            | 19.548  | 13.5717   | 11.1082    | 1         |
| cg16614288  | SLC27A1<br>CSGALNACT1;CSGALNACT1;CSGALNAC                   | 2.60E-07          | 2.60E-07             | 5.21148            | 5.21148                      | T up vs N                              | 71.847  | 25.5261   | 5.6845     | 1         |
| cg16615388  | T1                                                          | 0.00059721        | 0.000597213          | 0.277096           | -3.60886                     | T down vs N                            | 18.157  | 15.4269   | 13.5944    | 1         |
| cg16616467  | CPNE7;CPNE7                                                 | 5.73E-06          | 5.73E-06             | 37.287             | 37.287                       | T up vs N                              | 44.024  | 122.646   | 44.5744    | 1         |
| cg16616514  | PPP2R2C;PPP2R2C                                             | 2.50E-06          | 2.50E-06             | 0.07565            | -13.2188                     | T down vs N                            | 50.446  | 62.4241   | 19.7992    | 1         |
| cg16616521  | PAX6;PAX6;PAX6                                              | 1.85E-05          | 1.85E-05             | 94.1691            | 94.1691                      | T up vs N                              | 36.021  | 193.485   | 85.9422    | 1         |
| cg16617872  | SERPINE1;SERPINE1                                           | 2.78E-06          | 2.78E-06             | 0.154668           | -6.46544                     | T down vs N                            | 49.588  | 32.6291   | 10.5282    | 1         |
| cg16618104  | CHST11                                                      | 9.29E-05          | 9.29E-05             | 0.178502           | -5.60219                     | T down vs N                            | 26.739  | 27.8107   | 16.6415    | 1         |
| cg16618260  | BCL2L12;BCL2L12                                             | 0.00028037        | 0.000280374          | 0.315324           | -3.17134                     | T down vs N                            | 21.4    | 12.4764   | 9.32833    | 1         |
| cg16619378  | HS3ST3B1;MGC12916                                           | 0.00284679        | 0.00284679           | 3.21808            | 3.21808                      | T up vs N                              | 12.384  | 12.7947   | 16.5312    | 1         |
| cg16620526  | LVRN                                                        | 0.003053          | 0.003053             | 6.42986            | 6.42986                      | T up vs N                              | 12.152  | 32.4364   | 42.7088    | 1         |
| cg16622353  | EME1;EME1                                                   | 5.79E-06          | 5.79E-06             | 0.247059           | -4.04762                     | T down vs N                            | 43.948  | 18.3086   | 6.66565    | 1         |
| cg16626067  | CMTM2                                                       | 3.89E-06          | 3.89E-06             | 19.5195            | 19.5195                      | T up vs N                              | 46.955  | 82.6965   | 28.179     | 1         |
| cg16626623  | SNX24                                                       | 0.00032399        | 0.000323987          | 0.266753           | -3.74878                     | T down vs N                            | 20.755  | 16.355    | 12.608     | 1         |
| cg16628066  | CLIC6                                                       | 0.00490404        | 0.00490404           | 6.18924            | 6.18924                      | T up vs N                              | 10.635  | 31.1204   | 46.8177    | 1         |
| cg16629452  | KRTAP4-7                                                    | 6.36E-07          | 6.36E-07             | 0.146986           | -6.80336                     | T down vs N                            | 62.664  | 34.4346   | 8.79221    | 1         |
| cg16630303  | SCN4B;SCN4B                                                 | 2.95E-05          | 2.95E-05             | 0.303205           | -3.29809                     | T down vs N                            | 33.129  | 13.3381   | 6.44186    | 1         |
| cg16631417  | C11orf88                                                    | 4.11E-05          | 4.11E-05             | 0.172533           | -5.79598                     | T down vs N                            | 31.192  | 28.9192   | 14.834     | 1         |
| cg16632868  | FSHB;FSHB;FSHB                                              | 5.70E-05          | 5.70E-05             | 0.183126           | -5.46073                     | T down vs N                            | 29.351  | 26.9913   | 14.7139    | 1         |
| cg16635578  | KSR2                                                        | 0.0005245         | 0.0005245            | 0.31609            | -3.16366                     | T down vs N                            | 18.692  | 12.424    | 10.635     | 1         |
| cg16637690  | WWP2;WWP2                                                   | 0.00014517        | 0.000145166          | 0.269269           | -3.71376                     | T down vs N                            | 24.489  | 16.1235   | 10.5342    | 1         |
| cg16638385  | SOST                                                        | 3.15E-05          | 3.15E-05             | 11.3776            | 11.3776                      | T up vs N                              | 32.741  | 55.3814   | 27.0637    | 1         |
| cg16638834  | UNC93A;UNC93A                                               | 7.20E-07          | 7.20E-07             | 0.251542           | -3.97548                     | T down vs N                            | 61.468  | 17.8407   | 4.64389    | 1         |
| cg16639745  | FAM90A20                                                    | 0.00067068        | 0.000670677          | 0.256052           | -3.90546                     | T down vs N                            | 17.687  | 17.3842   | 15.7264    | 1         |
| cg16640691  | CHMP4C;CHMP4C                                               | 0.00075791        | 0.000757911          | 5.7216             | 5.7216                       | T up vs N                              | 17.199  | 28.4956   | 26.5099    | 1         |
| cg16642695  | ADHFE1                                                      | 1.45E-05          | 1.45E-05             | 0.27804            | -3.59661                     | T down vs N                            | 37.579  | 15.3453   | 6.53361    | 1         |
| cg16643169  | CCDC74B                                                     | 0.00168158        | 0.00168158           | 0.25781            | -3.87882                     | T down vs N                            | 14.2    | 17.21     | 19.3916    | 1         |
| cg16643542  | AZU1;AZU1                                                   | 0.00021589        | 0.000215889          | 0.27908            | -3.5832                      | T down vs N                            | 22.595  | 15.2559   | 10.8028    | 1         |
| cg16644494  | ODF3B                                                       | 0.00081571        | 0.000815707          | 0.237974           | -3.04902                     | T down vs N                            | 16.909  | 11.6405   | 11.0148    | 1         |
| cg16646645  | TRPM1                                                       | 0.0010035         | 0.0010035            | 0.251631           | -3.97408                     | T down vs N                            | 16.107  | 17.8316   | 17.7133    | 1         |
| cg16648603  | SLC35F3                                                     | 3.85E-05          | 3.85E-05             | 0.207311           | -4.82367                     | T down vs N                            | 31.559  | 23.1907   | 11.7576    | 1         |
| cg16649375  | UBQLNL;UBQLNL                                               | 0.00100986        | 0.00100986           | 0.275243           | -3.63316                     | T down vs N                            | 16.083  | 15.5887   | 15.5085    | 1         |
| cg16649915  | OR2M1P<br>BRE;RBKS;LOC100302650;BRE;BRE;BR                  | 0.0005037         | 0.000503702          | 0.246499           | -4.05681                     | T down vs N                            | 18.86   | 18.3681   | 15.5827    | 1         |
| cg16651262  | E;BRE                                                       | 2.57E-05          | 2.57E-05             | 0.104154           | -9.6012                      | T down vs N                            | 33.953  | 47.9186   | 22.5812    | 1         |
| cg16653901  | SKP1;SKP1                                                   | 0.00060407        | 0.000604073          | 0.163467           | -6.11744                     | T down vs N                            | 18.11   | 30.7233   | 27.1434    | 1         |
| cg16655883  | ZFR2;ZFR2;ZFR2                                              | 1.00E-05          | 1.00E-05             | 13.5924            | 13.5924                      | T up vs N                              | 40.053  | 63.7794   | 25.4782    | 1         |
| cg16656875  | SCML4                                                       | 9.06E-05          | 9.06E-05             | 0.230895           | -4.33097                     | T down vs N                            | 26.866  | 20.1236   | 11.9846    | 1         |
| cg16658931  | SHANK1                                                      | 8.62E-05          | 8.62E-05             | 13.3198            | 13.3198                      | T up vs N                              | 27.123  | 62.7927   | 37.0417    | 1         |
| cg16659026  | PRPF31;TFPT                                                 | 1.00E-05          | 1.00E-05             | 0.082948           | -12.0558                     | T down vs N                            | 40.045  | 58.0499   | 23.194     | 1         |
| cg16661000  | HAPLN3                                                      | 0.00036564        | 0.000365638          | 7.56573            | 7.56573                      | T up vs N                              | 20.225  | 38.3551   | 30.3428    | 1         |
| cg16661120  | MRPL54                                                      | 0.00331246        | 0.00331246           | 0.292038           | -3.42422                     | T down vs N                            | 11.884  | 14.1902   | 19.1052    | 1         |
| cg16663155  | INCENP;INCENP                                               | 0.00057901        | 0.000579008          | 0.262596           | -3.80813                     | T down vs N                            | 18.284  | 16.7461   | 14.6546    | 1         |
| cg16663980  | MNDA                                                        | 5.17E-06          | 5.17E-06             | 0.115628           | -8.64843                     | T down vs N                            | 44.784  | 43.5927   | 15.5743    | 1         |
| cg16664570  | CRH                                                         | 0.00043165        | 0.000431646          | 0.254486           | -3.92949                     | T down vs N                            | 19.511  | 17.5411   | 14.3848    | 1         |
| cg16666206  | ZNF586                                                      | 0.00101175        | 0.00101175           | 0.244819           | -4.08465                     | T down vs N                            | 16.076  | 18.5479   | 18.4607    | 1         |
| cg16669455  | CASP4                                                       | 1.66E-06          | 1.66E-06             | 0.237076           | -4.21806                     | T down vs N                            | 53.917  | 19.4048   | 5.75848    | 1         |
| cg16670554  | LBXCOR1                                                     | 7.13E-05          | 7.13E-05             | 11.454             | 11.454                       | T up vs N                              | 28.13   | 55.6865   | 31.6741    | 1         |
| cg16670736  | PTPRN2;PTPRN2;PTPRN2                                        | 0.00021181        | 0.00021181           | 0.284601           | -3.51369                     | T down vs N                            | 22.684  | 14.7912   | 10.4327    | 1         |

| Probeset ID | UCSC_REFGENE_NAME                                               | p-value<br>(Type) | p-value (T vs.<br>N) | Ratio (T<br>vs. N) | Fold-<br>Change (T<br>vs. N) | Fold-Change (T vs.<br>N) (Description) | F(Type) | SS (Type) | SS (Error) | F (Error) |
|-------------|-----------------------------------------------------------------|-------------------|----------------------|--------------------|------------------------------|----------------------------------------|---------|-----------|------------|-----------|
| cg16672562  | HIF3A;HIF3A;HIF3A                                               | 0.00343905        | 0.00343905           | 0.231172           | -4.32578                     | T down vs N                            | 11.762  | 20.0907   | 27.3304    | 1         |
| cg16672637  | FOXJ1                                                           | 0.00029172        | 0.000291722          | 0.299889           | -3.33456                     | T down vs N                            | 21.222  | 13.585    | 10.2425    | 1         |
| cg16672659  | HNF1B;HNF1B                                                     | 8.92E-06          | 8.92E-06             | 0.151886           | -6.5839                      | T down vs N                            | 40.86   | 33.2669   | 13.0266    | 1         |
| cg16674514  | LSM12                                                           | 7.98E-05          | 7.98E-05             | 0.229571           | -4.35595                     | T down vs N                            | 27.534  | 20.2818   | 11.7857    | 1         |
| cg16675054  | STK10                                                           | 3.49E-05          | 3.49E-05             | 0.18864            | -5.30112                     | T down vs N                            | 32.126  | 26.0562   | 12.977     | 1         |
| cg16676300  | YY1AP1;YY1AP1;DAP3;DAP3                                         | 0.00345374        | 0.00345374           | 0.277558           | -3.60286                     | T down vs N                            | 12.332  | 13.4636   | 15.2843    | 1         |
| cg16678467  | CACNG3                                                          | 0.00058086        | 0.000580857          | 0.212725           | -4.70091                     | T down vs N                            | 18.852  | 21.1173   | 16.8028    | 1         |
| cg16678925  | OR1A2                                                           | 0.00020913        | 0.000209133          | 0.255706           | -3.91073                     | T down vs N                            | 22.744  | 17.4187   | 12.2539    | 1         |
| cg16679386  | HSPA12B                                                         | 2.53E-06          | 2.53E-06             | 4.2267             | 4.2267                       | T up vs N                              | 50.361  | 19.46     | 6.18255    | 1         |
| cg16680125  | LGTN                                                            | 0.00033029        | 0.000330293          | 0.281157           | -3.55673                     | T down vs N                            | 20.67   | 15.0791   | 11.6723    | 1         |
| cg16681157  | ZNF423                                                          | 0.00053411        | 0.000534114          | 0.312159           | -3.20349                     | T down vs N                            | 18.616  | 12.6954   | 10.9113    | 1         |
| cg16683160  | LOC339524                                                       | 1.17E-05          | 1.17E-05             | 5.99713            | 5.99713                      | T up vs N                              | 38.984  | 30.0531   | 12.3345    | 1         |
| cg16686137  | TMEM143                                                         | 0.00109552        | 0.00109552           | 11.6358            | 11.6358                      | T up vs N                              | 15.774  | 56.4079   | 57.2173    | 1         |
| cg16686757  | PRX;PRX                                                         | 0.00094621        | 0.000946205          | 0.290972           | -3.43676                     | T down vs N                            | 16.332  | 14.2746   | 13.9843    | 1         |
| cg16686900  | C22orf43;C22orf43                                               | 5.43E-05          | 5.43E-05             | 0.240763           | -4.15346                     | T down vs N                            | 29.61   | 18.9909   | 10.262     | 1         |
| cg16688483  | GRHL2                                                           | 2.61E-05          | 2.61E-05             | 5.65776            | 5.65776                      | T up vs N                              | 33.862  | 28.1302   | 13.2919    | 1         |
| cg16688583  | PGR                                                             | 0.00083321        | 0.000833214          | 0.261843           | -3.81909                     | T down vs N                            | 16.826  | 16.8182   | 15.9929    | 1         |
| cg16693612  | KCNA7                                                           | 0.00020185        | 0.000201847          | 0.234867           | -4.25774                     | T down vs N                            | 22.91   | 19.6581   | 13.7291    | 1         |
| cg16696400  | A2BP1;A2BP1;A2BP1                                               | 6.00E-06          | 6.00E-06             | 0.148808           | -6.72007                     | T down vs N                            | 43.69   | 33.9936   | 12.4491    | 1         |
| cg16697850  | MOXD2                                                           | 0.00011912        | 0.000119119          | 0.264245           | -3.78436                     | T down vs N                            | 25.469  | 16.5897   | 10.4218    | 1         |
| cg16698286  | WDR24                                                           | 0.00253697        | 0.00253697           | 0.287135           | -3.48269                     | T down vs N                            | 12.77   | 14.5833   | 18.2713    | 1         |
| cg16699148  | TACSTD2                                                         | 2.98E-06          | 2.98E-06             | 4.26462            | 4.26462                      | T up vs N                              | 49.053  | 19.702    | 6.42639    | 1         |
| cg16700265  | ALPL2                                                           | 0.00022288        | 0.00022288           | 0.258298           | -3.8715                      | T down vs N                            | 22.448  | 17.162    | 12.2327    | 1         |
| cg16701167  | ME1                                                             | 1.40E-05          | 1.40E-05             | 6.19004            | 6.19004                      | T up vs N                              | 37.825  | 31.1248   | 13.1658    | 1         |
| cg16702815  | AGR3                                                            | 0.00206128        | 0.00206128           | 0.253506           | -3.94468                     | T down vs N                            | 13.483  | 17.6402   | 20.9339    | 1         |
| cg16704834  | MRPL21;MRPL21                                                   | 0.00010755        | 0.00010755           | 0.327131           | -3.05688                     | T down vs N                            | 25.985  | 11.6943   | 7.2006     | 1         |
| cg16706260  | REP15                                                           | 1.47E-06          | 1.47E-06             | 0.260668           | -3.8363                      | T down vs N                            | 54.94   | 16.9313   | 4.93085    | 1         |
| cg16706324  | TRIM78P;TRIM5;TRIM5;TRIM5                                       | 0.00178033        | 0.00178033           | 0.247324           | -4.04329                     | T down vs N                            | 13.997  | 18.2806   | 20.8966    | 1         |
| cg16706546  | IGF2BP2;IGF2BP2                                                 | 0.00011398        | 0.000113978          | 0.274134           | -3.64785                     | T down vs N                            | 25.691  | 15.6864   | 9.76921    | 1         |
| cg16709353  | TPCN2                                                           | 0.00736251        | 0.00736251           | 0.271155           | -3.68793                     | T down vs N                            | 9.4103  | 15.9524   | 27.1235    | 1         |
| cg16709517  | TRIM26                                                          | 0.00121927        | 0.00121927           | 0.317543           | -3.14918                     | T down vs N                            | 15.372  | 12.3253   | 12.8285    | 1         |
| cg16711983  | FAM129A                                                         | 0.0001731         | 0.000173101          | 0.286723           | -3.48768                     | T down vs N                            | 23.638  | 14.6168   | 9.8939     | 1         |
| cg16713808  | CRNN                                                            | 0.00051834        | 0.000518344          | 0.312539           | -3.1996                      | T down vs N                            | 18.741  | 12.6689   | 10.8163    | 1         |
| cg16714273  | DUSP15;DUSP15;DUSP15                                            | 8.49E-06          | 8.49E-06             | 0.224088           | -4.46253                     | T down vs N                            | 41.207  | 20.9536   | 8.13592    | 1         |
| cg16717532  | OR2L13                                                          | 5.73E-05          | 5.73E-05             | 0.321193           | -3.1134                      | T down vs N                            | 29.318  | 12.0809   | 6.59313    | 1         |
| cg16717713  | CCDC85C                                                         | 0.00022368        | 0.000223676          | 4.89455            | 4.89455                      | T up vs N                              | 22.431  | 23.6227   | 16.8501    | 1         |
| cg16718760  | ERC2                                                            | 0.00245369        | 0.00245369           | 0.267747           | -3.73487                     | T down vs N                            | 12.884  | 16.2631   | 20.197     | 1         |
| cg16723488  | APOB                                                            | 0.0004788         | 0.000478804          | 5.80078            | 5.80078                      | T up vs N                              | 19.072  | 28.9465   | 24.2837    | 1         |
| cg16723800  | TAF7L;TAF7L                                                     | 0.0016855         | 0.0016855            | 5.62807            | 5.62807                      | T up vs N                              | 14.192  | 27.9596   | 31.5223    | 1         |
| cg16723982  | EIF2AK4                                                         | 7.31E-07          | 7.31E-07             | 0.212736           | -4.70066                     | T down vs N                            | 61.316  | 22.4356   | 5.85446    | 1         |
| cg16725050  | TUBA4B;TUBA4A                                                   | 0.00032351        | 0.000323508          | 8.57341            | 8.57341                      | T up vs N                              | 20.762  | 43.2413   | 33.3241    | 1         |
| cg16728539  | CACNA1C;CACNA1C;CACNA1C;CACNA1C;CACNA1C;CACNA1C;CACNA1C;CACNA1C | 0.0022002         | 0.0022002            | 0.297338           | -3.36317                     | T down vs N                            | 13.257  | 13.7784   | 16.6296    | 1         |
|             | FCAMR;FCAMR;FCAMR;FCAMR;FCAMR                                   | 8.50E-06          | 8.50E-06             | 0.279218           | -3.58143                     | T down vs N                            | 41.197  | 15.244    | 5.92043    | 1         |
|             | LGALS4                                                          | 0.002706          | 0.002706             | 0.275464           | -3.63023                     | T down vs N                            | 12.553  | 15.5692   | 19.8443    | 1         |
|             | DUSP5P                                                          | 1.16E-05          | 1.16E-05             | 4.23755            | 4.23755                      | T up vs N                              | 39.078  | 19.5293   | 7.99596    | 1         |
| cg16733813  | MRPL55;MRPL55;MRPL55;MRPL55;MRPL55                              | 7.53E-06          | 7.53E-06             | 0.301006           | -3.32219                     | T down vs N                            | 42.049  | 13.5013   | 5.1374     | 1         |
|             | OR5W2                                                           | 2.33E-05          | 2.33E-05             | 0.158785           | -6.29783                     | T down vs N                            | 34.565  | 31.7172   | 14.6818    | 1         |
|             | TNXB                                                            | 4.61E-05          | 4.61E-05             | 0.153634           | -6.509                       | T down vs N                            | 30.531  | 32.8642   | 17.2229    | 1         |
|             | KCNJ8                                                           | 3.67E-06          | 3.67E-06             | 7.6982             | 7.6982                       | T up vs N                              | 47.393  | 39.0159   | 13.1719    | 1         |
|             | HSP90AB2P                                                       | 0.00480016        | 0.00480016           | 0.308263           | -3.24399                     | T down vs N                            | 10.702  | 12.9709   | 19.3923    | 1         |
|             | HLA-A                                                           | 0.00045385        | 0.000453851          | 0.226582           | -4.41342                     | T down vs N                            | 19.298  | 20.6448   | 17.1167    | 1         |
|             | KLK3;KLK3;KLK3;KLK3;KLK3                                        | 3.95E-05          | 3.95E-05             | 0.228371           | -4.37884                     | T down vs N                            | 31.413  | 20.4266   | 10.4041    | 1         |
|             | B3GNT3                                                          | 0.00262972        | 0.00262972           | 0.186582           | -5.35956                     | T down vs N                            | 12.649  | 26.3999   | 33.3932    | 1         |
|             | SYCN                                                            | 4.41E-05          | 4.41E-05             | 0.333294           | -3.00035                     | T down vs N                            | 30.781  | 11.3069   | 5.87738    | 1         |
|             | ATP13A1                                                         | 8.92E-06          | 8.92E-06             | 0.15937            | -6.27469                     | T down vs N                            | 40.859  | 31.5904   | 12.3704    | 1         |
|             | OR11G2                                                          | 1.47E-05          | 1.47E-05             | 0.194093           | -5.15218                     | T down vs N                            | 37.504  | 25.1734   | 10.7395    | 1         |
|             | FMR1NB                                                          | 0.00093994        | 0.00093994           | 0.314635           | -3.17829                     | T down vs N                            | 16.358  | 12.5238   | 12.2498    | 1         |
|             | FGG;FGG;FGG;FGG                                                 | 8.26E-06          | 8.26E-06             | 0.283597           | -3.52613                     | T down vs N                            | 41.4    | 14.8745   | 5.74857    | 1         |
|             | EHBP1L1                                                         | 5.45E-07          | 5.45E-07             | 4.48728            | 4.48728                      | T up vs N                              | 64.18   | 21.1089   | 5.26241    | 1         |
|             | OSR1                                                            | 0.0005165         | 0.000516498          | 7.20753            | 7.20753                      | T up vs N                              | 18.755  | 36.5385   | 31.1706    | 1         |
|             | LSAMP                                                           | 0.0039594         | 0.0039594            | 0.282917           | -3.53461                     | T down vs N                            | 11.308  | 14.9312   | 21.1265    | 1         |
|             | TBCD                                                            | 0.00094136        | 0.000941363          | 0.211724           | -4.72313                     | T down vs N                            | 16.352  | 22.574    | 22.0881    | 1         |
|             | ZIC1                                                            | 0.00515516        | 0.00515516           | 0.235222           | -4.25131                     | T down vs N                            | 10.7    | 18.4632   | 25.8822    | 1         |
|             | CREB5;CREB5;CREB5                                               | 7.79E-05          | 7.79E-05             | 0.299572           | -3.33809                     | T down vs N                            | 27.661  | 13.6089   | 7.87171    | 1         |
|             | TNFRSF21                                                        | 9.11E-07          | 9.11E-07             | 0.215407           | -4.64237                     | T down vs N                            | 59.25   | 22.0752   | 5.96126    | 1         |
|             | RTP1                                                            | 6.28E-05          | 6.28E-05             | 0.310346           | -3.22221                     | T down vs N                            | 28.815  | 12.8228   | 7.12003    | 1         |

| Probeset ID                                                        | UCSC_REFGENE_NAME         | p-value<br>(Type) | p-value (T vs.<br>N) | Ratio (T<br>vs. N) | Fold-<br>Change (T<br>vs. N) | Fold-Change (T vs.<br>N) (Description) | F(Type) | SS (Type) | SS (Error) | F (Error) |
|--------------------------------------------------------------------|---------------------------|-------------------|----------------------|--------------------|------------------------------|----------------------------------------|---------|-----------|------------|-----------|
| cg16763885                                                         | NTM;NTM;NTM;NTM           | 1.04E-05          | 1.04E-05             | 0.126801           | -7.88634                     | T down vs N                            | 39.779  | 39.9445   | 16.0665    | 1         |
| cg16764236                                                         | CCL11                     | 1.36E-05          | 1.36E-05             | 0.173029           | -5.77939                     | T down vs N                            | 38.013  | 28.8249   | 12.1325    | 1         |
| cg16764637                                                         | HOXA7                     | 0.00121377        | 0.00121377           | 5.93409            | 5.93409                      | T up vs N                              | 15.389  | 29.6995   | 30.8783    | 1         |
| cg16765706                                                         | OR6S1                     | 0.00390839        | 0.00390839           | 0.296938           | -3.36771                     | T down vs N                            | 11.35   | 13.8091   | 19.4675    | 1         |
| cg16766036                                                         | RASA3                     | 0.00268161        | 0.00268161           | 4.62282            | 4.62282                      | T up vs N                              | 12.584  | 21.9541   | 27.9147    | 1         |
| cg16766325                                                         | SPRY2                     | 0.00058171        | 0.00058171           | 0.275716           | -3.62692                     | T down vs N                            | 18.264  | 15.5472   | 13.6197    | 1         |
| cg16767590                                                         | PCGF3                     | 0.00105674        | 0.00105674           | 3.06231            | 3.06231                      | T up vs N                              | 15.91   | 11.7315   | 11.7978    | 1         |
| cg16769152                                                         | KCTD14                    | 3.40E-06          | 3.40E-06             | 11.2013            | 11.2013                      | T up vs N                              | 47.987  | 54.6723   | 18.229     | 1         |
| cg16770238                                                         | ANKRD30B                  | 0.00037547        | 0.000375466          | 3.26412            | 3.26412                      | T up vs N                              | 20.11   | 13.1076   | 10.4289    | 1         |
| cg16771467                                                         | ATP8B1                    | 2.39E-05          | 2.39E-05             | 5.64411            | 5.64411                      | T up vs N                              | 34.401  | 28.0518   | 13.0471    | 1         |
| cg16773563                                                         | DDX56                     | 0.00302759        | 0.00302759           | 0.27725            | -3.60685                     | T down vs N                            | 12.179  | 15.4136   | 20.249     | 1         |
| cg16773803                                                         | L3MBTL1;L3MBTL            | 0.00035343        | 0.000353432          | 0.267504           | -3.73826                     | T down vs N                            | 20.373  | 16.2855   | 12.7899    | 1         |
| cg16775746                                                         | LOC339674                 | 5.63E-06          | 5.63E-06             | 9.91401            | 9.91401                      | T up vs N                              | 44.155  | 49.2866   | 17.8596    | 1         |
| cg16775752                                                         | ARHGAP22                  | 3.85E-05          | 3.85E-05             | 7.57449            | 7.57449                      | T up vs N                              | 31.564  | 38.399    | 19.4649    | 1         |
| cg16780204                                                         | PPP4R4                    | 6.75E-06          | 6.75E-06             | 0.183332           | -5.45458                     | T down vs N                            | 42.833  | 26.9554   | 10.0691    | 1         |
| cg16781264                                                         | NMS                       | 0.00069762        | 0.000697617          | 8.7339             | 8.7339                       | T up vs N                              | 17.529  | 43.9911   | 40.1549    | 1         |
| cg16781287                                                         | UBE4A                     | 8.28E-06          | 8.28E-06             | 0.221484           | -4.51499                     | T down vs N                            | 41.376  | 21.2824   | 8.22978    | 1         |
| PDE9A;PDE9A;PDE9A;PDE9A;PDE9A;P<br>DE9A;PDE9A;PDE9A;PDE9A;PDE9A;PD |                           |                   |                      |                    |                              |                                        |         |           |            |           |
| cg16784985                                                         | E9A;PDE9A;PDE9A;PDE9A;PDE | 0.00040806        | 0.000408057          | 5.30886            | 5.30886                      | T up vs N                              | 19.751  | 26.1018   | 21.1448    | 1         |
| cg16785213                                                         | GABARAPL2                 | 0.00135124        | 0.00135124           | 0.280791           | -3.56137                     | T down vs N                            | 14.992  | 15.1101   | 16.1258    | 1         |
| cg16786297                                                         | SDCBP2;SDCBP2             | 0.0067113         | 0.0067113            | 0.321831           | -3.10722                     | T down vs N                            | 9.6836  | 12.0387   | 19.8914    | 1         |
| cg16786808                                                         | EPHA4                     | 0.00011477        | 0.000114768          | 5.73377            | 5.73377                      | T up vs N                              | 25.656  | 28.5651   | 17.814     | 1         |
| cg16787431                                                         | HOXB3                     | 8.81E-06          | 8.81E-06             | 13.2696            | 13.2696                      | T up vs N                              | 40.943  | 62.6098   | 24.4673    | 1         |
| cg16788099                                                         | LOC100130987;CLCF1;CLCF1  | 6.02E-06          | 6.02E-06             | 0.24275            | -4.11947                     | T down vs N                            | 43.671  | 18.7724   | 6.87774    | 1         |
| cg16789707                                                         | RNF166                    | 1.04E-06          | 1.04E-06             | 0.254655           | -3.92689                     | T down vs N                            | 58.051  | 17.5241   | 4.82998    | 1         |
| cg16792160                                                         | ASAH2;ASAH2               | 4.68E-06          | 4.68E-06             | 0.151594           | -6.59655                     | T down vs N                            | 45.543  | 33.3347   | 11.7111    | 1         |
| cg16792302                                                         | MAP1D                     | 0.00284131        | 0.00284131           | 3.10582            | 3.10582                      | T up vs N                              | 12.39   | 12.0291   | 15.534     | 1         |
| cg16792548                                                         | PRKAG3                    | 0.00078188        | 0.00078188           | 0.319693           | -3.128                       | T down vs N                            | 17.075  | 12.1807   | 11.4135    | 1         |
| cg16794061                                                         | HLA-DRA                   | 0.00035954        | 0.000359541          | 0.159096           | -6.28551                     | T down vs N                            | 20.298  | 31.6497   | 24.9478    | 1         |
| cg16796951                                                         | C20orf152                 | 0.00010223        | 0.000102229          | 0.163333           | -3.00003                     | T down vs N                            | 26.244  | 11.3047   | 6.89206    | 1         |
| cg16797751                                                         | ATXN7L1;ATXN7L1           | 0.0038705         | 0.0038705            | 0.292072           | -3.42382                     | T down vs N                            | 11.381  | 14.1875   | 19.9462    | 1         |
| cg16797972                                                         | EPHA3;EPHA3               | 0.00010998        | 0.00010998           | 0.078673           | -12.7109                     | T down vs N                            | 25.872  | 60.5437   | 37.4423    | 1         |
| cg16802592                                                         | LOC145845                 | 0.00018951        | 0.000189511          | 0.299013           | -3.34434                     | T down vs N                            | 23.207  | 13.6512   | 9.41185    | 1         |
| cg16805553                                                         | MPZL3                     | 0.00045202        | 0.000452017          | 0.190153           | -5.25893                     | T down vs N                            | 19.315  | 25.8071   | 21.3779    | 1         |
| cg16807989                                                         | OR1F1                     | 0.00135545        | 0.00135545           | 0.28088            | -3.56023                     | T down vs N                            | 14.981  | 15.1025   | 16.13      | 1         |
| cg16808120                                                         | EYA1;EYA1;EYA1;EYA1       | 0.00055706        | 0.00055706           | 0.261594           | -3.82272                     | T down vs N                            | 18.442  | 16.842    | 14.6116    | 1         |
| cg16809304                                                         | LY6K;LY6K;LY6K            | 3.92E-06          | 3.92E-06             | 0.145908           | -6.85365                     | T down vs N                            | 46.898  | 34.6996   | 11.8384    | 1         |
| cg16809460                                                         | DMRTA2                    | 0.0006361         | 0.000636101          | 0.16138            | -6.19656                     | T down vs N                            | 17.9    | 31.1608   | 27.8528    | 1         |
| cg16810293                                                         | TM4SF1                    | 2.65E-05          | 2.65E-05             | 0.244357           | -4.09238                     | T down vs N                            | 33.781  | 18.5978   | 8.80856    | 1         |
| cg16818372                                                         | SKAP1;SKAP1               | 0.00130626        | 0.00130626           | 0.158085           | -6.32571                     | T down vs N                            | 15.117  | 31.8696   | 33.7313    | 1         |
| cg16822143                                                         | MKX                       | 6.59E-05          | 6.59E-05             | 0.223771           | -4.46886                     | T down vs N                            | 28.556  | 20.9934   | 11.7628    | 1         |
| cg16823042                                                         | AGAP2;LOC100130776;AGAP2  | 0.00409842        | 0.00409842           | 3.5473             | 3.5473                       | T up vs N                              | 11.198  | 15.0161   | 21.4548    | 1         |
| cg16831427                                                         | AWAT2                     | 0.00042583        | 0.000425828          | 0.311874           | -3.20642                     | T down vs N                            | 19.569  | 12.7154   | 10.3966    | 1         |
| cg16834356                                                         | DEFA6                     | 0.000738          | 0.000738003          | 0.277481           | -3.60385                     | T down vs N                            | 17.304  | 15.3936   | 14.2335    | 1         |
| cg16834726                                                         | DCTN2                     | 6.48E-06          | 6.48E-06             | 0.28384            | -3.52311                     | T down vs N                            | 43.134  | 14.8542   | 5.50997    | 1         |
| cg16836678                                                         | CAPN5                     | 0.00090182        | 0.000901815          | 0.285824           | -3.49865                     | T down vs N                            | 16.518  | 14.6904   | 14.2299    | 1         |
| CASP1;CASP1;CASP1;CASP1;CASP1;CA                                   |                           |                   |                      |                    |                              |                                        |         |           |            |           |
| cg16837206                                                         | RD17                      | 0.00134164        | 0.00134164           | 0.262477           | -3.80985                     | T down vs N                            | 15.431  | 15.7717   | 15.331     | 1         |
| cg16837441                                                         | MATN4;MATN4;MATN4;RBPJL   | 2.15E-05          | 2.15E-05             | 7.34121            | 7.34121                      | T up vs N                              | 35.067  | 37.2216   | 16.9832    | 1         |
| cg16841389                                                         | AMMECR1;RGAG1             | 3.73E-05          | 3.73E-05             | 0.314427           | -3.18038                     | T down vs N                            | 31.753  | 12.538    | 6.31778    | 1         |
| cg16842053                                                         | CARD11;CARD11             | 0.00056135        | 0.000561346          | 10.5959            | 10.5959                      | T up vs N                              | 18.411  | 52.1862   | 45.3527    | 1         |
| cg16842280                                                         | MYH1                      | 0.00014876        | 0.000148757          | 0.220246           | -4.54039                     | T down vs N                            | 24.37   | 21.4411   | 14.0771    | 1         |
| cg16845257                                                         | DRD2;DRD2                 | 4.07E-05          | 4.07E-05             | 0.251581           | -3.97486                     | T down vs N                            | 31.249  | 17.8366   | 9.1328     | 1         |
| cg16848221                                                         | CLPP                      | 7.67E-05          | 7.67E-05             | 0.259047           | -3.86031                     | T down vs N                            | 27.741  | 17.0887   | 9.85618    | 1         |
| cg16848524                                                         | KIAA1688                  | 4.21E-05          | 4.21E-05             | 6.08724            | 6.08724                      | T up vs N                              | 31.052  | 30.5556   | 15.7444    | 1         |
| cg16848937                                                         | GLI3                      | 0.00174458        | 0.00174458           | 0.301925           | -3.31208                     | T down vs N                            | 14.069  | 13.4329   | 15.2766    | 1         |
| cg16850897                                                         | ZAN;ZAN                   | 0.00421127        | 0.00421127           | 0.328945           | -3.04002                     | T down vs N                            | 11.112  | 11.5788   | 16.6719    | 1         |
| cg16853860                                                         | PSMB9;PSMB9;TAP1          | 0.00017743        | 0.000177432          | 0.236922           | -4.2208                      | T down vs N                            | 23.52   | 19.4223   | 13.2127    | 1         |
| cg16855633                                                         | PNMA2                     | 0.0058378         | 0.0058378            | 0.318              | -3.14465                     | T down vs N                            | 10.102  | 12.2944   | 19.4731    | 1         |
| cg16856453                                                         | KCNS1                     | 8.44E-05          | 8.44E-05             | 3.06096            | 3.06096                      | T up vs N                              | 27.237  | 11.7222   | 6.88619    | 1         |
| cg16857113                                                         | CTNN6                     | 4.40E-05          | 4.40E-05             | 0.271926           | -3.67747                     | T down vs N                            | 30.792  | 15.8831   | 8.25315    | 1         |
| cg16861241                                                         | FOXJ1                     | 4.60E-05          | 4.60E-05             | 0.284187           | -3.51881                     | T down vs N                            | 30.548  | 14.8254   | 7.76497    | 1         |
| cg16863382                                                         | CTRB1                     | 0.00572046        | 0.00572046           | 3.02841            | 3.02841                      | T up vs N                              | 10.163  | 11.4993   | 18.1035    | 1         |
| cg16866941                                                         | MAFF;MAFF;MAFF;MAFF       | 0.00021501        | 0.000215008          | 0.319728           | -3.12766                     | T down vs N                            | 22.615  | 12.1784   | 8.61633    | 1         |
| cg16871561                                                         | SLC25A3;SLC25A3;SLC25A3   | 0.00642242        | 0.00642242           | 0.1337             | -7.47943                     | T down vs N                            | 9.8146  | 37.9214   | 61.8204    | 1         |
| cg16872071                                                         | RALGDS;RALGDS             | 0.00012572        | 0.000125724          | 3.01427            | 3.01427                      | T up vs N                              | 25.199  | 11.4023   | 7.23977    | 1         |
| cg16875863                                                         | GRIN2D;GRWD1              | 0.00036417        | 0.000364166          | 3.1973             | 3.1973                       | T up vs N                              | 20.243  | 12.6533   | 10.0014    | 1         |
| cg16893174                                                         | ALOX12P2                  | 8.01E-05          | 8.01E-05             | 5.31411            | 5.31411                      | T up vs N                              | 27.509  | 26.1327   | 15.1996    | 1         |
| cg16893618                                                         | CD97;CD97;CD97            | 1.03E-05          | 1.03E-05             | 0.203176           | -4.92185                     | T down vs N                            | 39.86   | 23.7884   | 9.54875    | 1         |
| cg16893868                                                         | LILRA2;LILRA2             | 1.72E-05          | 1.72E-05             | 0.173554           | -5.76189                     | T down vs N                            | 36.485  | 28.7254   | 12.5973    | 1         |

| Probeset ID                      | UCSC_REFGENE_NAME            | p-value<br>(Type) | p-value (T vs.<br>N) | Ratio (T<br>vs. N) | Fold-<br>Change (T<br>vs. N) | Fold-Change (T vs.<br>N) (Description) | F(Type) | SS (Type) | SS (Error) | F (Error) |
|----------------------------------|------------------------------|-------------------|----------------------|--------------------|------------------------------|----------------------------------------|---------|-----------|------------|-----------|
| cg16894746                       | ELK4;ELK4                    | 0.00260571        | 0.00260571           | 0.314795           | -3.17667                     | T down vs N                            | 12.68   | 12.5128   | 15.7888    | 1         |
| cg16896205                       | CD53                         | 5.43E-07          | 5.43E-07             | 0.293522           | -3.4069                      | T down vs N                            | 64.216  | 14.0735   | 3.50657    | 1         |
| cg16903517                       | RNPEPL1                      | 6.87E-05          | 6.87E-05             | 0.316762           | -3.15694                     | T down vs N                            | 28.326  | 12.3782   | 6.99185    | 1         |
| cg16904399                       | PIP4K2A                      | 9.72E-05          | 9.72E-05             | 3.09308            | 3.09308                      | T up vs N                              | 26.504  | 11.942    | 7.20922    | 1         |
| cg16905984                       | PRAMEF4                      | 4.78E-06          | 4.78E-06             | 0.317259           | -3.15199                     | T down vs N                            | 45.382  | 12.3445   | 4.35222    | 1         |
| cg16906229                       | KCNQ4;KCNQ4                  | 2.48E-05          | 2.48E-05             | 3.09588            | 3.09588                      | T up vs N                              | 34.181  | 11.9612   | 5.59903    | 1         |
| cg16907566                       | COL14A1                      | 3.02E-05          | 3.02E-05             | 6.051              | 6.051                        | T up vs N                              | 32.992  | 30.3539   | 14.7205    | 1         |
| cg16908601                       | OR2B3                        | 2.83E-05          | 2.83E-05             | 0.18013            | -5.55155                     | T down vs N                            | 33.375  | 27.5184   | 13.1924    | 1         |
| cg16909685                       | IBSP                         | 0.00016094        | 0.000160943          | 0.277333           | -3.60578                     | T down vs N                            | 23.988  | 15.4064   | 10.2762    | 1         |
| cg16909733                       | ANKMY1;ANKMY1                | 0.00024629        | 0.000246288          | 5.73053            | 5.73053                      | T up vs N                              | 21.988  | 28.5466   | 20.7728    | 1         |
| cg16909962                       | RAB4A                        | 0.0037073         | 0.0037073            | 4.3568             | 4.3568                       | T up vs N                              | 11.519  | 20.2872   | 28.1796    | 1         |
| cg16911672                       | SELENBP1                     | 0.00052553        | 0.000525532          | 0.26518            | -3.77103                     | T down vs N                            | 18.683  | 16.5018   | 14.1318    | 1         |
| PLEKHB1;PLEKHB1;PLEKHB1;PLEKHB1; |                              |                   |                      |                    |                              |                                        |         |           |            |           |
| cg16915828                       | PLEKHB1                      | 1.51E-05          | 1.51E-05             | 14.4337            | 14.4337                      | T up vs N                              | 37.319  | 66.7487   | 28.6173    | 1         |
| cg16916745                       | XAGE5                        | 0.00222811        | 0.00222811           | 0.328578           | -3.04342                     | T down vs N                            | 13.213  | 11.6021   | 14.0489    | 1         |
| cg16925177                       | KCNB2                        | 0.00094408        | 0.000944076          | 0.280197           | -3.56891                     | T down vs N                            | 16.341  | 15.1605   | 14.8442    | 1         |
| cg16926712                       | INTS9;INTS9;INTS9            | 0.00012344        | 0.00012344           | 0.300729           | -3.32525                     | T down vs N                            | 25.291  | 13.522    | 8.55458    | 1         |
| cg16927242                       | MEIS1                        | 0.00015039        | 0.000150385          | 0.281936           | -3.5469                      | T down vs N                            | 24.317  | 15.0134   | 9.87856    | 1         |
| cg16927372                       | ACCN1                        | 0.00020005        | 0.000200047          | 0.249618           | -4.00612                     | T down vs N                            | 22.952  | 18.0397   | 12.5758    | 1         |
| PRAME;PRAME;LOC648691;PRAME;P    |                              |                   |                      |                    |                              |                                        |         |           |            |           |
| cg16932094                       | RAME;PRAME                   | 3.62E-06          | 3.62E-06             | 0.265337           | -3.7688                      | T down vs N                            | 47.512  | 16.4871   | 5.55211    | 1         |
| cg16932304                       | WFDC6                        | 6.37E-05          | 6.37E-05             | 0.144872           | -6.90266                     | T down vs N                            | 28.738  | 34.957    | 19.4623    | 1         |
| cg16936370                       | MMP19                        | 4.70E-05          | 4.70E-05             | 0.179198           | -5.58043                     | T down vs N                            | 30.422  | 27.6852   | 14.5606    | 1         |
| cg16936953                       | TMEM49                       | 0.00512618        | 0.00512618           | 0.293223           | -3.41038                     | T down vs N                            | 10.499  | 14.0969   | 21.484     | 1         |
| cg16941122                       | UBAC2;UBAC2;UBAC2            | 0.00026063        | 0.000260628          | 0.330311           | -3.02745                     | T down vs N                            | 21.73   | 11.4927   | 8.46228    | 1         |
| cg16942644                       | COL18A1                      | 1.71E-05          | 1.71E-05             | 0.156211           | -6.4016                      | T down vs N                            | 36.503  | 32.283    | 14.1501    | 1         |
| cg16943185                       | AMOTL1                       | 0.00022336        | 0.000223361          | 0.303628           | -3.2935                      | T down vs N                            | 22.438  | 13.307    | 9.48909    | 1         |
| cg16943635                       | SCGB1D4                      | 3.33E-05          | 3.33E-05             | 0.295924           | -3.37924                     | T down vs N                            | 32.411  | 13.887    | 6.85539    | 1         |
| cg16947138                       | FLJ32810                     | 2.86E-05          | 2.86E-05             | 0.304043           | -3.289                       | T down vs N                            | 33.313  | 13.2765   | 6.37652    | 1         |
| cg16949103                       | LOC399959                    | 6.48E-06          | 6.48E-06             | 0.258816           | -3.86375                     | T down vs N                            | 43.13   | 17.1113   | 6.34787    | 1         |
| cg16950247                       | SLC22A24;SLC22A24            | 6.24E-06          | 6.24E-06             | 0.155794           | -6.41875                     | T down vs N                            | 43.402  | 32.3761   | 11.9354    | 1         |
| cg16951105                       | SACM1L                       | 5.70E-06          | 5.70E-06             | 0.17425            | -5.73887                     | T down vs N                            | 44.069  | 28.5942   | 10.3817    | 1         |
| cg16956426                       | SGCE;SGCE;PEG10;SGCE;PEG10   | 0.00401581        | 0.00401581           | 0.239733           | -4.17131                     | T down vs N                            | 11.512  | 17.9816   | 23.4303    | 1         |
| cg16956501                       | PHF11;PHF11                  | 0.00103083        | 0.00103083           | 4.87095            | 4.87095                      | T up vs N                              | 16.004  | 23.4791   | 23.4726    | 1         |
| cg16956686                       | SDK1;SDK1                    | 0.00027103        | 0.000271027          | 4.54575            | 4.54575                      | T up vs N                              | 21.553  | 21.4745   | 15.9421    | 1         |
| cg16957758                       | ADARB2                       | 5.39E-05          | 5.39E-05             | 0.197712           | -5.05786                     | T down vs N                            | 29.657  | 24.6092   | 13.2765    | 1         |
| cg16959747                       | RBP5                         | 8.57E-07          | 8.57E-07             | 0.252023           | -3.96789                     | T down vs N                            | 59.815  | 17.7913   | 4.759      | 1         |
| cg16960593                       | LPA                          | 0.00047536        | 0.000475361          | 0.26919            | -3.71485                     | T down vs N                            | 19.103  | 16.1307   | 13.5108    | 1         |
| cg16961528                       | GRID2                        | 1.47E-05          | 1.47E-05             | 0.233406           | -4.28437                     | T down vs N                            | 37.49   | 19.8277   | 8.46206    | 1         |
| cg16964748                       | DCC                          | 2.54E-06          | 2.54E-06             | 0.303883           | -3.29074                     | T down vs N                            | 50.339  | 13.2882   | 4.22357    | 1         |
| cg16965605                       | HMGA2                        | 5.77E-06          | 5.77E-06             | 0.275794           | -3.6259                      | T down vs N                            | 43.978  | 15.5404   | 5.6539     | 1         |
| cg16965794                       | TRPM1                        | 0.00140241        | 0.00140241           | 0.282682           | -3.53754                     | T down vs N                            | 14.856  | 14.9508   | 16.1021    | 1         |
| cg16967578                       | TGFB2;TGFB2                  | 8.51E-05          | 8.51E-05             | 0.202134           | -4.94722                     | T down vs N                            | 27.194  | 23.9422   | 14.0869    | 1         |
| cg16969586                       | FAM38B                       | 6.13E-05          | 6.13E-05             | 3.13532            | 3.13532                      | T up vs N                              | 28.945  | 12.2306   | 6.76068    | 1         |
| cg16970828                       | UBA7;UBA7                    | 1.31E-05          | 1.31E-05             | 0.237039           | -4.21871                     | T down vs N                            | 38.243  | 19.409    | 8.12021    | 1         |
| cg16971745                       | IFIH1                        | 0.00133501        | 0.00133501           | 0.293967           | -3.40174                     | T down vs N                            | 15.037  | 14.0388   | 14.9382    | 1         |
| cg16985652                       | NROB2                        | 0.0024276         | 0.0024276            | 0.327205           | -3.05619                     | T down vs N                            | 12.92   | 11.6896   | 14.4763    | 1         |
| cg16987524                       | FBLN7;FBLN7                  | 0.00119302        | 0.00119302           | 3.37764            | 3.37764                      | T up vs N                              | 15.454  | 13.8762   | 14.3669    | 1         |
| cg16987735                       | LCE1E                        | 0.00418328        | 0.00418328           | 0.329013           | -3.0394                      | T down vs N                            | 11.133  | 11.5746   | 16.6341    | 1         |
| cg16989201                       | SNORD115-41                  | 0.00027161        | 0.000271612          | 0.290257           | -3.44522                     | T down vs N                            | 21.543  | 14.3315   | 10.6441    | 1         |
| cg16993682                       | CD1C                         | 2.49E-06          | 2.49E-06             | 0.126547           | -7.90221                     | T down vs N                            | 50.491  | 40.0223   | 12.6827    | 1         |
| cg16999254                       | RGR;RGR;RGR                  | 0.00085391        | 0.000853914          | 9.88462            | 9.88462                      | T up vs N                              | 16.73   | 49.1591   | 47.0147    | 1         |
| cg17000021                       | C20orf108                    | 0.00094143        | 0.000941432          | 0.195538           | -5.11409                     | T down vs N                            | 16.352  | 24.946    | 24.4095    | 1         |
| cg17000343                       | FAM66E                       | 3.65E-06          | 3.65E-06             | 0.143593           | -6.96413                     | T down vs N                            | 47.437  | 35.2786   | 11.899     | 1         |
| cg17001430                       | KIF25;KIF25                  | 1.45E-05          | 1.45E-05             | 0.292367           | -3.42036                     | T down vs N                            | 37.598  | 14.1642   | 6.02764    | 1         |
| cg17001457                       | EXOC8;EXOC8                  | 6.55E-05          | 6.55E-05             | 0.255943           | -3.90712                     | T down vs N                            | 28.585  | 17.3951   | 9.73656    | 1         |
| cg17001566                       | PRDM16;PRDM16                | 7.13E-06          | 7.13E-06             | 7.89859            | 7.89859                      | T up vs N                              | 42.438  | 40.0046   | 15.0824    | 1         |
| cg17001652                       | CXCL13                       | 1.92E-06          | 1.92E-06             | 0.125095           | -7.99394                     | T down vs N                            | 52.658  | 40.4705   | 12.2969    | 1         |
| cg17004025                       | PRTN3                        | 1.89E-06          | 1.89E-06             | 0.306875           | -3.25865                     | T down vs N                            | 52.777  | 13.0705   | 3.96248    | 1         |
| cg17004104                       | NNMT                         | 0.00018444        | 0.000184443          | 0.301294           | -3.31902                     | T down vs N                            | 23.335  | 13.4798   | 9.24258    | 1         |
| cg17008375                       | CUX1;CUX1;CUX1               | 0.00106793        | 0.00106793           | 3.27834            | 3.27834                      | T up vs N                              | 15.87   | 13.2041   | 13.3122    | 1         |
| PCDHGA4;PCDHGA9;PCDHGA1;PCDHG    |                              |                   |                      |                    |                              |                                        |         |           |            |           |
| B1;PCDHGB7;PCDHGB6;PCDHGB3;PCD   |                              |                   |                      |                    |                              |                                        |         |           |            |           |
| cg17011276                       | HGA6;PCDHGA8;PCDHGA10;PCDHGA | 2.47E-05          | 2.47E-05             | 7.44123            | 7.44123                      | T up vs N                              | 34.193  | 37.7287   | 17.6545    | 1         |
| cg17013303                       | ORSB2                        | 1.41E-05          | 1.41E-05             | 0.259912           | -3.84746                     | T down vs N                            | 37.74   | 17.0045   | 7.20903    | 1         |
| cg17013645                       | JPH1                         | 0.00139828        | 0.00139828           | 0.298536           | -3.34967                     | T down vs N                            | 14.867  | 13.6872   | 14.7306    | 1         |
| cg17013888                       | FMNL2                        | 0.00016089        | 0.000160889          | 4.01584            | 4.01584                      | T up vs N                              | 23.989  | 18.1028   | 12.0739    | 1         |
| cg17014186                       | MOSPD3                       | 2.23E-06          | 2.23E-06             | 0.243609           | -4.10493                     | T down vs N                            | 51.394  | 18.6787   | 5.81513    | 1         |
| cg17015522                       | C1QTNF1;C1QTNF1;C1QTNF1      | 0.0002355         | 0.000235496          | 0.260818           | -3.83409                     | T down vs N                            | 22.193  | 16.9167   | 12.1959    | 1         |
| cg17017404                       | ALX4                         | 6.05E-05          | 6.05E-05             | 0.237834           | -4.20461                     | T down vs N                            | 29.015  | 19.3188   | 10.6531    | 1         |
| cg17017814                       | OR4A47                       | 9.58E-05          | 9.58E-05             | 0.313763           | -3.18712                     | T down vs N                            | 26.579  | 12.5839   | 7.57527    | 1         |

| Probeset ID | UCSC_REFGENE_NAME                                                                       | p-value<br>(Type) | p-value (T vs.<br>N) | Ratio (T<br>vs. N) | Fold-<br>Change (T<br>vs. N) | Fold-Change (T vs.<br>N) (Description) | F(Type) | SS (Type) | SS (Error) | F (Error) |
|-------------|-----------------------------------------------------------------------------------------|-------------------|----------------------|--------------------|------------------------------|----------------------------------------|---------|-----------|------------|-----------|
| cg17018082  | SAMD12;SAMD12                                                                           | 2.27E-05          | 2.27E-05             | 0.269774           | -3.7068                      | T down vs N                            | 34.731  | 16.0774   | 7.40652    | 1         |
| cg17018517  | ENTPD2;ENTPD2                                                                           | 1.04E-05          | 1.04E-05             | 3.70864            | 3.70864                      | T up vs N                              | 39.805  | 16.0896   | 6.46741    | 1         |
| cg17019053  | C2orf65                                                                                 | 0.00038348        | 0.000383476          | 8.85372            | 8.85372                      | T up vs N                              | 20.018  | 44.546    | 35.604     | 1         |
| cg17019292  | MARVELD2;MARVELD2                                                                       | 0.00127954        | 0.00127954           | 3.79766            | 3.79766                      | T up vs N                              | 15.193  | 16.6772   | 17.5627    | 1         |
| cg17021527  | POGZ;POGZ;POGZ                                                                          | 0.00014619        | 0.000146188          | 0.329894           | -3.03128                     | T down vs N                            | 24.455  | 11.5189   | 7.53643    | 1         |
| cg17022548  | NRG2;NRG2;NRG2;NRG2                                                                     | 3.38E-05          | 3.38E-05             | 0.155088           | -6.44797                     | T down vs N                            | 32.324  | 32.5345   | 16.1041    | 1         |
| cg17024523  | MLH1;MLH1;MLH1;MLH1                                                                     | 0.00010327        | 0.000103274          | 0.261367           | -3.82605                     | T down vs N                            | 26.192  | 16.8639   | 10.3017    | 1         |
| cg17024944  | CD109;CD109;CD109                                                                       | 2.66E-05          | 2.66E-05             | 0.189817           | -5.26823                     | T down vs N                            | 33.744  | 25.8621   | 12.2629    | 1         |
| cg17025555  | OR6K6                                                                                   | 0.00051721        | 0.00051721           | 0.182767           | -5.47146                     | T down vs N                            | 18.75   | 27.0537   | 23.0863    | 1         |
| cg17028105  | LOC100130331                                                                            | 0.00136391        | 0.00136391           | 4.16434            | 4.16434                      | T up vs N                              | 14.958  | 19.0608   | 20.3887    | 1         |
| cg17028443  | PRKX                                                                                    | 0.00116695        | 0.00116695           | 0.274891           | -3.6378                      | T down vs N                            | 15.536  | 15.6196   | 16.0859    | 1         |
| cg17029019  | HIC1;HIC1                                                                               | 0.00013459        | 0.000134594          | 6.75059            | 6.75059                      | T up vs N                              | 24.861  | 34.1555   | 21.9817    | 1         |
| cg17031543  | SPATA18                                                                                 | 0.00041243        | 0.000412426          | 0.253359           | -3.94697                     | T down vs N                            | 19.705  | 17.6551   | 14.3353    | 1         |
| cg17031773  | KLK9                                                                                    | 0.00050976        | 0.000509763          | 0.262224           | -3.81354                     | T down vs N                            | 18.81   | 16.7817   | 14.2746    | 1         |
| cg17031787  | TNXB                                                                                    | 0.00034026        | 0.000340258          | 0.223276           | -4.47877                     | T down vs N                            | 20.539  | 21.0555   | 16.4022    | 1         |
| cg17032565  | SH3RF3                                                                                  | 0.00010977        | 0.000109766          | 0.121928           | -8.20153                     | T down vs N                            | 25.882  | 41.4749   | 25.6398    | 1         |
| cg17032590  | SLC2A7                                                                                  | 0.00171426        | 0.00171426           | 0.323063           | -3.09537                     | T down vs N                            | 14.131  | 11.9577   | 13.5389    | 1         |
| cg17032990  | MAP4K4;MAP4K4;MAP4K4                                                                    | 6.14E-05          | 6.14E-05             | 3.25742            | 3.25742                      | T up vs N                              | 28.935  | 13.0621   | 7.22292    | 1         |
| cg17035984  | CDCP2                                                                                   | 0.00029789        | 0.000297886          | 0.323442           | -3.09174                     | T down vs N                            | 21.128  | 11.9329   | 9.03661    | 1         |
| cg17035997  | HSD17B1                                                                                 | 0.00047693        | 0.000476932          | 0.32753            | -3.05316                     | T down vs N                            | 19.089  | 11.6688   | 9.78072    | 1         |
| cg17036641  | GNL3;GNL3;GNL3;SNORD19B                                                                 | 0.00156731        | 0.00156731           | 0.316412           | -3.16043                     | T down vs N                            | 14.453  | 12.402    | 13.73      | 1         |
| cg17038633  | C5orf58                                                                                 | 0.00064001        | 0.000640011          | 0.33219            | -3.01033                     | T down vs N                            | 17.876  | 11.3753   | 10.1818    | 1         |
| cg17040753  | LIMS3-LOC440895;LIMS3-LOC440895;LOC440895                                               | 0.00055818        | 0.000558182          | 3.44576            | 3.44576                      | T up vs N                              | 18.434  | 14.3352   | 12.4423    | 1         |
| cg17046586  | LIMA1;LIMA1                                                                             | 2.73E-06          | 2.73E-06             | 0.286076           | -3.49558                     | T down vs N                            | 49.74   | 14.6697   | 4.71888    | 1         |
| cg17047890  | C3orf26;FILIP1L;MIR548G;FILIP1L;FILIP1L                                                 | 9.75E-05          | 9.75E-05             | 0.254557           | -3.9284                      | T down vs N                            | 26.489  | 17.534    | 10.5911    | 1         |
| cg17049621  | FZD2                                                                                    | 6.94E-05          | 6.94E-05             | 4.98657            | 4.98657                      | T up vs N                              | 28.273  | 24.18     | 13.6836    | 1         |
| cg17050616  | MOV10L1;MOV10L1;MOV10L1;MOV10L1                                                         | 0.00359896        | 0.00359896           | 0.219231           | -4.5614                      | T down vs N                            | 11.614  | 21.5721   | 29.7178    | 1         |
| cg17053060  | HEPHL1                                                                                  | 4.21E-06          | 4.21E-06             | 0.256364           | -3.90071                     | T down vs N                            | 46.348  | 17.3532   | 5.9906     | 1         |
| cg17059136  | OR13A1                                                                                  | 1.37E-05          | 1.37E-05             | 0.251118           | -3.98219                     | T down vs N                            | 37.936  | 17.8843   | 7.543      | 1         |
| cg17060964  | ORSAS1                                                                                  | 1.10E-05          | 1.10E-05             | 0.261727           | -3.82077                     | T down vs N                            | 39.389  | 16.8292   | 6.83615    | 1         |
| cg17066531  | PI16;PI16                                                                               | 0.00013488        | 0.000134879          | 0.318724           | -3.13751                     | T down vs N                            | 24.851  | 12.2456   | 7.88431    | 1         |
| cg17067544  | IL6                                                                                     | 0.00013849        | 0.000138488          | 0.195567           | -5.11334                     | T down vs N                            | 24.72   | 24.9415   | 16.1431    | 1         |
| cg17067638  | SNORD115-10                                                                             | 0.00057978        | 0.000579775          | 0.25998            | -3.84645                     | T down vs N                            | 18.278  | 16.9978   | 14.8793    | 1         |
| cg17069313  | ENPP6                                                                                   | 0.00565641        | 0.00565641           | 0.218441           | -4.5779                      | T down vs N                            | 10.197  | 21.6749   | 34.0087    | 1         |
| cg17072519  | AIFM3;AIFM3;AIFM3;AIFM3                                                                 | 0.0018638         | 0.0018638            | 3.27815            | 3.27815                      | T up vs N                              | 13.835  | 13.2028   | 15.2688    | 1         |
| cg17073392  | MIR548H4;NOX5                                                                           | 0.00217864        | 0.00217864           | 6.69349            | 6.69349                      | T up vs N                              | 13.291  | 33.8523   | 40.7528    | 1         |
| cg17077042  | UFC1                                                                                    | 4.40E-05          | 4.40E-05             | 0.238713           | -4.18913                     | T down vs N                            | 30.796  | 19.2197   | 9.98569    | 1         |
| cg17077401  | ETV6                                                                                    | 0.00106416        | 0.00106416           | 0.238979           | -4.18446                     | T down vs N                            | 15.884  | 19.1898   | 19.3305    | 1         |
| cg17078369  | IL23A                                                                                   | 6.57E-05          | 6.57E-05             | 0.173769           | -5.75475                     | T down vs N                            | 28.57   | 28.6847   | 16.0643    | 1         |
| cg17078427  | CLDN11                                                                                  | 0.00147934        | 0.00147934           | 14.6809            | 14.6809                      | T up vs N                              | 14.661  | 67.6005   | 73.7724    | 1         |
| cg17079374  | CAMTA1                                                                                  | 0.00112674        | 0.00112674           | 0.236893           | -4.22131                     | T down vs N                            | 15.668  | 19.4256   | 19.8375    | 1         |
| cg17080423  | FGF5;FGF5                                                                               | 8.66E-06          | 8.66E-06             | 6.93149            | 6.93149                      | T up vs N                              | 41.069  | 35.108    | 13.6778    | 1         |
| cg17080893  | FABP5                                                                                   | 4.56E-07          | 4.56E-07             | 6.00121            | 6.00121                      | T up vs N                              | 70.9    | 28.3067   | 5.98871    | 1         |
| cg17081998  | CXCR2;CXCR2                                                                             | 4.56E-05          | 4.56E-05             | 0.310267           | -3.22303                     | T down vs N                            | 30.597  | 12.8284   | 6.70837    | 1         |
| cg17082347  | LBXCOR1                                                                                 | 0.00190005        | 0.00190005           | 14.1844            | 14.1844                      | T up vs N                              | 13.767  | 65.8803   | 76.5645    | 1         |
| cg17083209  | LPHN2                                                                                   | 0.00020512        | 0.000205123          | 0.143236           | -6.98149                     | T down vs N                            | 22.834  | 35.3691   | 24.7833    | 1         |
| cg17085688  | GNGT1                                                                                   | 0.00052326        | 0.000523257          | 0.231337           | -4.32271                     | T down vs N                            | 18.701  | 20.0712   | 17.172     | 1         |
| cg17086141  | NPEPPS                                                                                  | 0.00625281        | 0.00625281           | 0.327943           | -3.04931                     | T down vs N                            | 9.8947  | 11.6425   | 18.8262    | 1         |
| cg17088014  | SLA;TG;SLA;SLA                                                                          | 8.63E-05          | 8.63E-05             | 0.275155           | -3.63432                     | T down vs N                            | 27.119  | 15.5964   | 9.20168    | 1         |
| cg17088155  | NEK11;NEK11;ASTE1;NEK11                                                                 | 0.00033719        | 0.00033719           | 0.236148           | -4.23464                     | T down vs N                            | 20.579  | 19.5107   | 15.1694    | 1         |
| cg17090901  | PHF20L1;PHF20L1                                                                         | 0.00024543        | 0.000245432          | 0.288648           | -3.46443                     | T down vs N                            | 22.004  | 14.4606   | 10.5151    | 1         |
| cg17092065  | SMAD3;SMAD3;SMAD3;SMAD3                                                                 | 0.00041578        | 0.000415781          | 0.317502           | -3.14959                     | T down vs N                            | 19.671  | 12.328    | 10.0276    | 1         |
| cg17093088  | GRID2IP                                                                                 | 0.00647632        | 0.00647632           | 3.0989             | 3.0989                       | T up vs N                              | 9.7897  | 11.9818   | 19.5828    | 1         |
| cg17093478  | PCDHA6;PCDHA2;PCDHA1;PCDHA9;PCDHA7;PCDHA1;PCDHA6;PCDHA5;PCDHA10;PCDHA3;PCDHA4;PCDHA10;P | 4.28E-05          | 4.28E-05             | 3.02077            | 3.02077                      | T up vs N                              | 30.953  | 11.4469   | 5.91712    | 1         |
| cg17093826  | ATP6V0A4;ATP6V0A4;ATP6V0A4;ATP6V0A4                                                     | 0.00242903        | 0.00242903           | 3.14091            | 3.14091                      | T up vs N                              | 12.918  | 12.2688   | 15.196     | 1         |
| cg17094014  | MDFI                                                                                    | 0.00130297        | 0.00130297           | 18.6856            | 18.6856                      | T up vs N                              | 15.126  | 80.2843   | 84.922     | 1         |
| cg17097782  | OSR1                                                                                    | 3.04E-05          | 3.04E-05             | 73.4651            | 73.4651                      | T up vs N                              | 32.952  | 172.923   | 83.9637    | 1         |
| cg17099048  | COL22A1                                                                                 | 0.00010919        | 0.000109191          | 0.296209           | -3.37599                     | T down vs N                            | 25.908  | 13.865    | 8.56254    | 1         |
| cg17102069  | PIM1                                                                                    | 0.00024752        | 0.000247516          | 0.181671           | -5.50445                     | T down vs N                            | 21.965  | 27.2455   | 19.8465    | 1         |
| cg17102807  | POLR1C;POLR1C;YIPF3                                                                     | 0.00242734        | 0.00242734           | 0.321573           | -3.10972                     | T down vs N                            | 12.92   | 12.0558   | 14.9294    | 1         |
| cg17104824  | HOXD4;MIR10B                                                                            | 0.00040702        | 0.000407017          | 13.8281            | 13.8281                      | T up vs N                              | 19.762  | 64.6225   | 52.321     | 1         |
| cg17105755  | C2orf65                                                                                 | 4.39E-05          | 4.39E-05             | 7.49674            | 7.49674                      | T up vs N                              | 30.808  | 38.0087   | 19.74      | 1         |
| cg17107501  | ARHGAP19                                                                                | 6.60E-06          | 6.60E-06             | 0.282398           | -3.5411                      | T down vs N                            | 42.993  | 14.9746   | 5.57284    | 1         |
| cg17107540  | NODAL                                                                                   | 6.25E-05          | 6.25E-05             | 0.202369           | -4.94147                     | T down vs N                            | 28.838  | 23.9074   | 13.2645    | 1         |
| cg17107572  | MEIS1                                                                                   | 0.00287956        | 0.00287956           | 0.262736           | -3.8061                      | T down vs N                            | 12.346  | 16.7327   | 21.686     | 1         |

| Probeset ID                      | UCSC_REFGENE_NAME        | p-value<br>(Type) | p-value (T vs.<br>N) | Ratio (T<br>vs. N) | Fold-<br>Change (T<br>vs. N) | Fold-Change (T vs.<br>N) (Description) | F(Type) | SS (Type) | SS (Error) | F (Error) |
|----------------------------------|--------------------------|-------------------|----------------------|--------------------|------------------------------|----------------------------------------|---------|-----------|------------|-----------|
| cg17107691                       | KANK2;KANK2              | 0.00045302        | 0.000453024          | 0.248928           | -4.01722                     | T down vs N                            | 19.306  | 18.1117   | 15.0106    | 1         |
| cg17109533                       | MIR515-2;MIR515-1        | 0.00029643        | 0.000296427          | 0.31248            | -3.2002                      | T down vs N                            | 21.15   | 12.673    | 9.58718    | 1         |
| cg17110364                       | PLEKHH2;LOC728819        | 6.43E-05          | 6.43E-05             | 0.166135           | -6.01921                     | T down vs N                            | 28.69   | 30.1765   | 16.8292    | 1         |
| cg17111780                       | PAQR5                    | 0.00034092        | 0.000340924          | 3.97338            | 3.97338                      | T up vs N                              | 20.531  | 17.827    | 13.893     | 1         |
| cg17111846                       | C1orf185                 | 0.00060071        | 0.000600709          | 0.26464            | -3.77871                     | T down vs N                            | 18.133  | 16.5524   | 14.6053    | 1         |
| cg17112707                       | CCBE1                    | 4.45E-07          | 4.45E-07             | 0.147515           | -6.77895                     | T down vs N                            | 66.202  | 34.3056   | 8.29119    | 1         |
| cg17114584                       | IRF7;IRF7;IRF7           | 9.30E-05          | 9.30E-05             | 4.57177            | 4.57177                      | T up vs N                              | 26.732  | 21.6368   | 12.9505    | 1         |
| cg17116170                       | OR1M1                    | 0.00055879        | 0.000558791          | 0.315012           | -3.17448                     | T down vs N                            | 18.43   | 12.4978   | 10.8502    | 1         |
| cg17117459                       | PARP4                    | 0.00057857        | 0.000578571          | 0.28982            | -3.45041                     | T down vs N                            | 18.287  | 14.3664   | 12.57      | 1         |
| cg17118262                       | CCL1                     | 0.00012907        | 0.000129067          | 0.215934           | -4.63105                     | T down vs N                            | 25.069  | 22.0051   | 14.0446    | 1         |
| cg17120792                       | ORSI1                    | 2.54E-06          | 2.54E-06             | 0.180836           | -5.52986                     | T down vs N                            | 50.343  | 27.3928   | 8.70592    | 1         |
| cg17121747                       | MFSO7                    | 0.00080416        | 0.00080416           | 5.5089             | 5.5089                       | T up vs N                              | 16.965  | 27.2713   | 25.7203    | 1         |
| cg17123655                       | TNFRSF9                  | 0.00028651        | 0.000286511          | 0.328107           | -3.04779                     | T down vs N                            | 21.302  | 11.6321   | 8.73675    | 1         |
| cg17123690                       | SHISA7                   | 6.13E-05          | 6.13E-05             | 3.22031            | 3.22031                      | T up vs N                              | 28.947  | 12.8099   | 7.08044    | 1         |
| cg17124408                       | SLC22A9;SLC22A9          | 1.89E-05          | 1.89E-05             | 0.166475           | -6.00689                     | T down vs N                            | 35.863  | 30.1077   | 13.4322    | 1         |
| cg17125804                       | CUX2                     | 3.92E-05          | 3.92E-05             | 0.114784           | -8.71204                     | T down vs N                            | 32.928  | 41.3076   | 18.8172    | 1         |
| cg17128184                       | ARID1B;ARID1B;ARID1B     | 0.00082544        | 0.00082544           | 4.42045            | 4.42045                      | T up vs N                              | 16.862  | 20.689    | 19.631     | 1         |
| cg17128312                       | FBXW9                    | 0.00093876        | 0.00093876           | 0.267045           | -3.74469                     | T down vs N                            | 16.363  | 16.328    | 15.9661    | 1         |
| cg17128947                       | CPLX1                    | 0.00554778        | 0.00554778           | 5.65808            | 5.65808                      | T up vs N                              | 10.256  | 28.132    | 43.886     | 1         |
| cg17129918                       | KRT77                    | 0.00081262        | 0.00081262           | 5.58513            | -3.86827                     | T down vs N                            | 16.924  | 17.1409   | 16.2053    | 1         |
| cg17131579                       | PFDN6;WDR46;WDR46        | 4.96E-05          | 4.96E-05             | 0.225146           | -4.44157                     | T down vs N                            | 30.118  | 20.8219   | 11.0614    | 1         |
| cg17133734                       | AKAP13;AKAP13            | 2.83E-05          | 2.83E-05             | 0.22132            | -4.51833                     | T down vs N                            | 33.373  | 21.3033   | 10.2135    | 1         |
| cg17134153                       | FCRL3                    | 7.73E-06          | 7.73E-06             | 0.189536           | -5.27603                     | T down vs N                            | 41.867  | 25.9082   | 9.90127    | 1         |
| cg17135423                       | RNF186                   | 1.81E-05          | 1.81E-05             | 0.286888           | -3.48569                     | T down vs N                            | 36.147  | 14.6034   | 6.46404    | 1         |
| CPT1B;CPT1B;CPT1B;CPT1B;CHKB-    |                          |                   |                      |                    |                              |                                        |         |           |            |           |
| cg17137457                       | CPT1B;CPT1B;CPT1B;CPT1B  | 0.00130542        | 0.00130542           | 4.99704            | 4.99704                      | T up vs N                              | 15.119  | 24.2432   | 25.6554    | 1         |
| cg17141115                       | GULP1                    | 0.00033744        | 0.000337442          | 0.301227           | -3.31975                     | T down vs N                            | 20.576  | 13.4848   | 10.486     | 1         |
| cg17142149                       | RCAN2                    | 0.00041352        | 0.000413515          | 4.56607            | 4.56607                      | T up vs N                              | 19.694  | 21.6012   | 17.5495    | 1         |
| cg17142723                       | NBR1;NBR1;NBR1           | 2.95E-07          | 2.95E-07             | 0.266632           | -3.75049                     | T down vs N                            | 70.48   | 16.3663   | 3.71538    | 1         |
| cg17143179                       | PRDM1;PRDM1;PRDM1        | 1.33E-05          | 1.33E-05             | 0.224361           | -4.4571                      | T down vs N                            | 38.152  | 20.9196   | 8.77316    | 1         |
| cg17143192                       | CLDN23;CLDN23            | 0.00011431        | 0.000114307          | 25.4104            | 25.4104                      | T up vs N                              | 25.677  | 98.0287   | 61.0851    | 1         |
| cg17143900                       | CAMTA1                   | 1.28E-05          | 1.28E-05             | 0.261539           | -3.82352                     | T down vs N                            | 38.427  | 16.8473   | 7.01482    | 1         |
| cg17146918                       | ODZ4                     | 2.36E-06          | 2.36E-06             | 0.314592           | -3.17872                     | T down vs N                            | 50.948  | 12.5267   | 3.93393    | 1         |
|                                  |                          |                   |                      |                    |                              |                                        |         |           |            |           |
| cg17147440                       | TPM1;TPM1;TPM1;TPM1;TPM1 | 0.00057436        | 0.000574359          | 0.307875           | -3.24807                     | T down vs N                            | 18.317  | 12.9986   | 11.3546    | 1         |
| cg17151123                       | BNC1                     | 1.83E-05          | 1.83E-05             | 0.201821           | -4.95489                     | T down vs N                            | 36.062  | 23.9886   | 10.6432    | 1         |
| cg17151621                       | AHSG                     | 0.00270409        | 0.00270409           | 0.250484           | -3.99227                     | T down vs N                            | 12.556  | 17.9498   | 22.8742    | 1         |
| cg17151991                       | STK11                    | 0.00097483        | 0.000974833          | 0.32685            | -3.05951                     | T down vs N                            | 16.218  | 11.7123   | 11.5551    | 1         |
| cg17154935                       | KLK6;KLK6;KLK6           | 0.00371261        | 0.00371261           | 0.21354            | -4.68296                     | T down vs N                            | 11.514  | 22.3263   | 31.0244    | 1         |
| ZNF419;ZNF419;ZNF419;ZNF419;ZNF4 |                          |                   |                      |                    |                              |                                        |         |           |            |           |
| cg17155115                       | 19;ZNF419;ZNF419         | 9.78E-05          | 9.78E-05             | 0.247919           | -4.03357                     | T down vs N                            | 26.47   | 18.2177   | 11.0119    | 1         |
| cg17155263                       | CXorf61;CXorf61          | 0.0017747         | 0.0017747            | 0.30389            | -3.29067                     | T down vs N                            | 14.008  | 13.2877   | 15.1771    | 1         |
| cg17156983                       | ARL5B                    | 2.49E-05          | 2.49E-05             | 0.199524           | -5.01193                     | T down vs N                            | 34.166  | 24.333    | 11.3951    | 1         |
| cg17157129                       | RBM41;RBM41              | 0.00364756        | 0.00364756           | 0.258218           | -3.8727                      | T down vs N                            | 11.571  | 17.1699   | 23.7417    | 1         |
| cg17157798                       | TMEM132D                 | 0.00012891        | 0.000128907          | 0.243162           | -4.11248                     | T down vs N                            | 25.075  | 18.7274   | 11.9497    | 1         |
| cg17158414                       | KRTCAP3;KRTCAP3          | 0.00010351        | 0.000103505          | 5.13068            | 5.13068                      | T up vs N                              | 26.181  | 25.0451   | 15.3061    | 1         |
| cg17158564                       | UCN3                     | 4.18E-06          | 4.18E-06             | 0.276948           | -3.61078                     | T down vs N                            | 46.403  | 15.4398   | 5.32377    | 1         |
| cg17158811                       | SSX1;SSX1                | 0.00018024        | 0.000180238          | 0.331601           | -3.01567                     | T down vs N                            | 23.445  | 11.412    | 7.78814    | 1         |
| PROM1;PROM1;PROM1;PROM1;PRO      |                          |                   |                      |                    |                              |                                        |         |           |            |           |
| cg17160094                       | M1;PROM1;PROM1           | 5.52E-05          | 5.52E-05             | 0.162523           | -6.15297                     | T down vs N                            | 29.522  | 30.9201   | 16.7578    | 1         |
| cg17161617                       | RSPO1                    | 3.19E-06          | 3.19E-06             | 0.199796           | -5.0051                      | T down vs N                            | 48.498  | 24.2918   | 8.01409    | 1         |
| cg17162682                       | ZRANB3                   | 7.16E-05          | 7.16E-05             | 0.32606            | -3.06692                     | T down vs N                            | 28.107  | 11.7631   | 6.6962     | 1         |
| cg17164954                       | ARID1B;ARID1B;ARID1B     | 0.00034632        | 0.000346315          | 3.32966            | 3.32966                      | T up vs N                              | 20.462  | 13.5519   | 10.5967    | 1         |
| cg17165695                       | LOC100271715;LOC375196   | 4.47E-06          | 4.47E-06             | 4.60014            | 4.60014                      | T up vs N                              | 45.879  | 21.8132   | 7.60729    | 1         |
| cg17165818                       | OR4D11                   | 5.33E-05          | 5.33E-05             | 0.28639            | -3.49174                     | T down vs N                            | 29.718  | 14.644    | 7.88424    | 1         |
| cg17165848                       | WIPF1;WIPF1              | 0.00015803        | 0.000158026          | 0.233023           | -4.29142                     | T down vs N                            | 24.076  | 19.8725   | 13.2064    | 1         |
| cg17168428                       | SEPT7;SEPT7              | 4.59E-05          | 4.59E-05             | 3.1342             | 3.1342                       | T up vs N                              | 30.552  | 12.223    | 6.40112    | 1         |
| cg17168519                       | FAM154B                  | 7.20E-05          | 7.20E-05             | 0.291904           | -3.42579                     | T down vs N                            | 28.076  | 14.2008   | 8.09282    | 1         |
| cg17168630                       | PLAUR;PLAUR;PLAUR        | 9.28E-05          | 9.28E-05             | 0.298622           | -3.34871                     | T down vs N                            | 26.743  | 13.6807   | 8.18511    | 1         |
| cg17169998                       | MLC1;MLC1;MLC1           | 0.00231553        | 0.00231553           | 0.293424           | -3.40803                     | T down vs N                            | 13.081  | 14.0812   | 17.223     | 1         |
| cg17170442                       | DGKD;DGKD                | 7.78E-06          | 7.78E-06             | 0.180409           | -5.54297                     | T down vs N                            | 41.82   | 27.4687   | 10.5094    | 1         |
| cg17170942                       | UMPS                     | 0.00031215        | 0.000312145          | 0.286348           | -3.49226                     | T down vs N                            | 20.92   | 14.6475   | 11.2027    | 1         |
| cg17173423                       | MS4A3;MS4A3;MS4A3        | 0.00067726        | 0.000677257          | 0.316942           | -3.15515                     | T down vs N                            | 17.647  | 12.366    | 11.2117    | 1         |
| cg17177006                       | EDEM1                    | 2.85E-07          | 2.85E-07             | 0.294565           | -3.39484                     | T down vs N                            | 70.861  | 13.9922   | 3.15938    | 1         |
| cg17177074                       | CASZ1;CASZ1              | 9.42E-06          | 9.42E-06             | 0.324289           | -3.08367                     | T down vs N                            | 40.479  | 11.8777   | 4.69481    | 1         |
| cg17178175                       | NFE2L2;NFE2L2;NFE2L2     | 0.00555484        | 0.00555484           | 0.288147           | -3.47045                     | T down vs N                            | 10.253  | 14.5011   | 22.6303    | 1         |
| cg17178220                       | DNM3;DNM3;MIR199A2       | 0.00052253        | 0.000522529          | 0.250576           | -3.9908                      | T down vs N                            | 18.707  | 17.9402   | 15.3441    | 1         |
| cg17179314                       | CHRN84                   | 2.18E-05          | 2.18E-05             | 11.3477            | 11.3477                      | T up vs N                              | 34.986  | 55.2614   | 25.2728    | 1         |
| cg17180284                       | B3GALT1                  | 0.00189025        | 0.00189025           | 0.248272           | -4.02784                     | T down vs N                            | 13.786  | 18.1806   | 21.1011    | 1         |
| cg17184491                       | SLFN1;SLFN1              | 1.25E-05          | 1.25E-05             | 0.254594           | -3.92782                     | T down vs N                            | 38.537  | 17.5302   | 7.27825    | 1         |
| cg17186388                       | WIPF3                    | 2.09E-05          | 2.09E-05             | 3.4481             | 3.4481                       | T up vs N                              | 35.234  | 14.3509   | 6.51684    | 1         |
| cg17186428                       | SUV420H1;SUV420H1        | 0.00042876        | 0.000428758          | 0.200865           | -4.97846                     | T down vs N                            | 19.539  | 24.1311   | 19.76      | 1         |

| Probeset ID                   | UCSC_REFGENE_NAME               | p-value<br>(Type) | p-value (T vs.<br>N) | Ratio (T<br>vs. N) | Fold-<br>Change (T<br>vs. N) | Fold-Change (T vs.<br>N) (Description) | F(Type) | SS (Type) | SS (Error) | F (Error) |
|-------------------------------|---------------------------------|-------------------|----------------------|--------------------|------------------------------|----------------------------------------|---------|-----------|------------|-----------|
| WWTR1;WWTR1;WWTR1;WWTR1;W     |                                 |                   |                      |                    |                              |                                        |         |           |            |           |
| cg17186727                    | WTR1                            | 9.80E-06          | 9.80E-06             | 30.8574            | 30.8574                      | T up vs N                              | 40.206  | 110.152   | 43.8348    | 1         |
| cg17187764                    | AOBEC1                          | 3.47E-06          | 3.47E-06             | 0.178824           | -5.59209                     | T down vs N                            | 47.845  | 27.7524   | 9.28079    | 1         |
| cg17192315                    | SERPINB11                       | 0.00070456        | 0.00070456           | 0.212521           | -4.70541                     | T down vs N                            | 17.489  | 22.4648   | 20.5523    | 1         |
| cg17192862                    | RIMBP2                          | 0.00010053        | 0.000100534          | 0.179443           | -5.57281                     | T down vs N                            | 26.33   | 27.6412   | 16.7971    | 1         |
| cg17192954                    | C18orf2;C18orf2;C18orf2;C18orf2 | 4.14E-05          | 4.14E-05             | 0.248479           | -4.02448                     | T down vs N                            | 31.144  | 18.1588   | 9.32909    | 1         |
| cg17196739                    | C3orf25                         | 1.38E-05          | 1.38E-05             | 0.239766           | -4.17074                     | T down vs N                            | 37.895  | 19.1018   | 8.06523    | 1         |
| cg17197065                    | GK2;GK2                         | 0.00056196        | 0.000561963          | 0.32365            | -3.08976                     | T down vs N                            | 18.406  | 11.9193   | 10.3611    | 1         |
| SDCBP;SDCBP;SDCBP;SDCBP;SDCBP |                                 |                   |                      |                    |                              |                                        |         |           |            |           |
| cg17197774                    | SDCBP;SDCBP;SDCBP;SDCBP;SDCBP   | 2.94E-06          | 2.94E-06             | 0.292548           | -3.41824                     | T down vs N                            | 49.154  | 14.15     | 4.6059     | 1         |
| cg17202724                    | SMARCD2;SMARCD2                 | 0.0017556         | 0.0017556            | 0.331967           | -3.01235                     | T down vs N                            | 14.047  | 11.3892   | 12.973     | 1         |
| cg17203155                    | EFNA5                           | 0.00015119        | 0.000151189          | 0.258659           | -3.86609                     | T down vs N                            | 24.291  | 17.1266   | 11.281     | 1         |
| cg17204129                    | CFTR                            | 6.79E-06          | 6.79E-06             | 14.2501            | 14.2501                      | T up vs N                              | 42.795  | 66.1102   | 24.7169    | 1         |
| cg17206393                    | TRPC4AP;TRPC4AP                 | 0.00023475        | 0.000234746          | 0.280501           | -3.56505                     | T down vs N                            | 22.208  | 15.1347   | 10.904     | 1         |
| cg17208360                    | SNORD115-37                     | 0.00052464        | 0.000524643          | 0.270877           | -3.69172                     | T down vs N                            | 18.69   | 15.9775   | 13.6776    | 1         |
| cg17208869                    | HEATR7B2                        | 0.00042735        | 0.000427345          | 0.175222           | -5.70703                     | T down vs N                            | 19.553  | 28.4124   | 23.249     | 1         |
| cg17210035                    | DAGLB;DAGLB                     | 2.62E-05          | 2.62E-05             | 0.232445           | -4.3021                      | T down vs N                            | 33.854  | 19.9404   | 9.42415    | 1         |
| cg17210938                    | TACSTD2                         | 1.13E-05          | 1.13E-05             | 8.39853            | 8.39853                      | T up vs N                              | 39.222  | 42.4158   | 17.303     | 1         |
| cg17213074                    | SNX31                           | 6.38E-05          | 6.38E-05             | 0.252574           | -3.95923                     | T down vs N                            | 28.733  | 17.735    | 9.87591    | 1         |
| cg17217059                    | FAM160A1                        | 6.90E-05          | 6.90E-05             | 4.10769            | 4.10769                      | T up vs N                              | 28.304  | 18.6965   | 10.569     | 1         |
| cg17218045                    | DHDDS;DHDDS                     | 0.0021573         | 0.0021573            | 8.18825            | 8.18825                      | T up vs N                              | 13.325  | 41.411    | 49.7252    | 1         |
| cg17220055                    | HIVEP3;HIVEP3                   | 9.71E-05          | 9.71E-05             | 0.177965           | -5.61909                     | T down vs N                            | 26.51   | 27.908    | 16.844     | 1         |
| cg17221083                    | SPOCK1                          | 6.48E-05          | 6.48E-05             | 0.265579           | -3.76536                     | T down vs N                            | 28.648  | 16.4644   | 9.19559    | 1         |
| cg17221584                    | PRTG                            | 0.00010536        | 0.000105355          | 0.309296           | -3.23315                     | T down vs N                            | 26.09   | 12.8972   | 7.90932    | 1         |
| cg17221738                    | CLRN1;CLRN1OS                   | 3.31E-07          | 3.31E-07             | 0.205331           | -4.87018                     | T down vs N                            | 69.263  | 23.4745   | 5.42269    | 1         |
| cg17223809                    | COL24A1                         | 5.47E-07          | 5.47E-07             | 8.12947            | 8.12947                      | T up vs N                              | 64.131  | 41.1278   | 10.261     | 1         |
| cg17227358                    | DRGX                            | 0.00031653        | 0.000316525          | 0.287278           | -3.48095                     | T down vs N                            | 20.858  | 14.5716   | 11.1777    | 1         |
| cg17228560                    | KLHL10;NT5C3L                   | 6.54E-05          | 6.54E-05             | 0.241443           | -4.14176                     | T down vs N                            | 28.596  | 18.9158   | 10.5836    | 1         |
| cg17231690                    | KRT19                           | 0.00221818        | 0.00221818           | 9.73473            | 9.73473                      | T up vs N                              | 13.229  | 48.5056   | 58.6668    | 1         |
| cg17232583                    | BTNL2                           | 0.00077482        | 0.000774817          | 0.305546           | -3.27283                     | T down vs N                            | 17.111  | 13.1667   | 12.3116    | 1         |
| cg17232991                    | ACOX3;ACOX3                     | 0.00014159        | 0.000141591          | 0.254537           | -3.92871                     | T down vs N                            | 24.612  | 17.536    | 11.4002    | 1         |
| cg17233506                    | H0XB1                           | 0.00014234        | 0.000142342          | 4.44569            | 4.44569                      | T up vs N                              | 24.586  | 20.8478   | 13.5676    | 1         |
| cg17235179                    | CNOT8                           | 3.62E-05          | 3.62E-05             | 0.185407           | -5.39353                     | T down vs N                            | 31.918  | 26.599    | 13.3337    | 1         |
| cg17238009                    | C10orf11;C10orf11               | 0.00401342        | 0.00401342           | 0.297896           | -3.35688                     | T down vs N                            | 11.265  | 13.7359   | 19.5097    | 1         |
| cg17238766                    | C1orf87                         | 9.87E-05          | 9.87E-05             | 3.22291            | 3.22291                      | T up vs N                              | 26.425  | 12.8276   | 7.76682    | 1         |
| cg17240004                    | CASR                            | 0.00100954        | 0.00100954           | 0.30577            | -3.27043                     | T down vs N                            | 16.084  | 13.1505   | 13.0818    | 1         |
| cg17240198                    | NEK5                            | 0.00019303        | 0.000193031          | 0.209492           | -4.77346                     | T down vs N                            | 23.12   | 22.8833   | 15.8363    | 1         |
| cg17240760                    | CD53;CD53                       | 9.21E-05          | 9.21E-05             | 0.202655           | -4.93449                     | T down vs N                            | 26.782  | 23.8651   | 14.2572    | 1         |
| cg17240987                    | WFDC3;DNTTIP1                   | 3.94E-05          | 3.94E-05             | 0.280027           | -3.57109                     | T down vs N                            | 31.432  | 15.175    | 7.7247     | 1         |
| cg17241289                    | CALN1;CALN1                     | 0.00123876        | 0.00123876           | 0.281408           | -3.55356                     | T down vs N                            | 15.313  | 15.058    | 15.7331    | 1         |
| cg17242351                    | ACTC1                           | 0.00295827        | 0.00295827           | 4.55044            | 4.55044                      | T up vs N                              | 12.256  | 21.5038   | 28.073     | 1         |
| cg17245135                    | MEF2C;MEF2C                     | 2.82E-05          | 2.82E-05             | 3.39621            | 3.39621                      | T up vs N                              | 33.392  | 14.0015   | 6.70893    | 1         |
| cg17246140                    | HAO                             | 0.00036058        | 0.000360583          | 3.78049            | 3.78049                      | T up vs N                              | 20.286  | 16.5641   | 13.0648    | 1         |
| cg17249268                    | C18orf45                        | 0.00064507        | 0.000645069          | 0.321672           | -3.10876                     | T down vs N                            | 17.844  | 12.0492   | 10.8043    | 1         |
| cg17250863                    | GGT7                            | 4.50E-07          | 4.50E-07             | 5.61326            | 5.61326                      | T up vs N                              | 66.082  | 27.8745   | 6.7491     | 1         |
| cg17256679                    | CCL8                            | 0.00116692        | 0.00116692           | 0.291569           | -3.42972                     | T down vs N                            | 15.536  | 14.2272   | 14.6519    | 1         |
| cg17257444                    | OR4D6                           | 4.01E-09          | 4.01E-09             | 0.145154           | -6.88922                     | T down vs N                            | 131.29  | 34.8865   | 4.2517     | 1         |
| cg17259265                    | HYLS1                           | 0.00050694        | 0.000506941          | 0.277696           | -3.60106                     | T down vs N                            | 18.833  | 15.375    | 13.062     | 1         |
| cg17260591                    | FAM21C;FAM21C;FAM21C            | 2.14E-05          | 2.14E-05             | 0.231198           | -4.3253                      | T down vs N                            | 35.097  | 20.0876   | 9.15757    | 1         |
| cg17263323                    | STK32B                          | 0.00070871        | 0.000708708          | 0.268403           | -3.72574                     | T down vs N                            | 17.466  | 16.2027   | 14.8432    | 1         |
| cg17272126                    | HPX                             | 0.00022412        | 0.00022412           | 0.31486            | -3.17601                     | T down vs N                            | 22.422  | 12.5082   | 8.92578    | 1         |
| cg17272642                    | ROBO3                           | 2.91E-05          | 2.91E-05             | 3.01929            | 3.01929                      | T up vs N                              | 33.203  | 11.4368   | 5.51113    | 1         |
| cg17272843                    | KCTD14                          | 1.92E-05          | 1.92E-05             | 4.05564            | 4.05564                      | T up vs N                              | 35.766  | 18.3605   | 8.21364    | 1         |
| cg17273045                    | ZDHHC8P                         | 0.00131427        | 0.00131427           | 5.39355            | 5.39355                      | T up vs N                              | 15.094  | 26.5991   | 28.195     | 1         |
| cg17273683                    | C1orf130                        | 2.56E-05          | 2.56E-05             | 0.281291           | -3.55504                     | T down vs N                            | 33.988  | 15.0678   | 7.09334    | 1         |
| cg17276002                    | ANXA7;ANXA7                     | 0.00019627        | 0.000196269          | 0.08377            | -11.9375                     | T down vs N                            | 23.041  | 57.591    | 39.9914    | 1         |
| cg17277939                    | BEST3;BEST3                     | 0.00096435        | 0.000964353          | 0.300022           | -3.33308                     | T down vs N                            | 16.259  | 13.575    | 13.3586    | 1         |
| cg17279079                    | AATK                            | 4.20E-05          | 4.20E-05             | 4.73096            | 4.73096                      | T up vs N                              | 31.067  | 22.6222   | 11.6506    | 1         |
| cg17279103                    | MRPS14                          | 0.00059561        | 0.000595613          | 0.230529           | -4.33785                     | T down vs N                            | 18.168  | 20.1672   | 17.7609    | 1         |
| cg17279359                    | USH1C;USH1C                     | 0.00182699        | 0.00182699           | 4.0263             | 4.0263                       | T up vs N                              | 13.905  | 18.1706   | 20.9076    | 1         |
| cg17279652                    | TRIM7;TRIM7;TRIM7;TRIM7;TRIM7   | 1.67E-05          | 1.67E-05             | 3.77299            | 3.77299                      | T up vs N                              | 36.656  | 16.5147   | 7.20859    | 1         |
| cg17279839                    | RARRS2                          | 0.00098688        | 0.000986875          | 5.1689             | 5.1689                       | T up vs N                              | 16.171  | 25.273    | 25.0062    | 1         |
| cg17282428                    | C6orf103                        | 0.00014175        | 0.000141749          | 0.194951           | -5.1295                      | T down vs N                            | 24.606  | 25.0381   | 16.281     | 1         |
| cg17282466                    | LOC100130017                    | 4.87E-05          | 4.87E-05             | 0.245884           | -4.06696                     | T down vs N                            | 30.219  | 18.4337   | 9.76011    | 1         |
| cg17283266                    | ALG9;ALG9;ALG9;ALG9             | 3.05E-05          | 3.05E-05             | 0.309603           | -3.22994                     | T down vs N                            | 32.936  | 12.8754   | 6.25481    | 1         |
| cg17283294                    | PKLR;PKLR                       | 1.04E-05          | 1.04E-05             | 0.283075           | -3.53263                     | T down vs N                            | 39.799  | 14.918    | 5.9973     | 1         |
| cg17285883                    | ARHGFE10L                       | 0.0042615         | 0.0042615            | 0.286805           | -3.48668                     | T down vs N                            | 11.075  | 14.6101   | 21.1076    | 1         |
| cg17287107                    | SULT1C2;SULT1C2                 | 4.23E-07          | 4.23E-07             | 0.303411           | -3.29586                     | T down vs N                            | 66.721  | 13.3229   | 3.19491    | 1         |
| cg17293395                    | BRS3                            | 0.0004309         | 0.000430902          | 0.308379           | -3.24276                     | T down vs N                            | 19.518  | 12.9626   | 10.6261    | 1         |
| cg17293936                    | DGKG;DGKG;DGKG                  | 4.59E-06          | 4.59E-06             | 11.1175            | 11.1175                      | T up vs N                              | 45.69   | 54.3328   | 19.0268    | 1         |
| cg17295447                    | MKI67;MKI67                     | 1.51E-05          | 1.51E-05             | 0.229153           | -4.3639                      | T down vs N                            | 37.335  | 20.3321   | 8.71327    | 1         |
| cg17295666                    | UBOX5;FASTKD5;UBOX5             | 0.00027729        | 0.000277286          | 0.174662           | -5.72534                     | T down vs N                            | 21.45   | 28.517    | 21.2719    | 1         |

| Probeset ID | UCSC_REFGENE_NAME                                              | p-value<br>(Type) | p-value (T vs.<br>N) | Ratio (T<br>vs. N) | Fold-<br>Change (T<br>vs. N) | Fold-Change (T vs.<br>N) (Description) | F(Type) | SS (Type) | SS (Error) | F (Error) |
|-------------|----------------------------------------------------------------|-------------------|----------------------|--------------------|------------------------------|----------------------------------------|---------|-----------|------------|-----------|
| cg17295910  | EBF3                                                           | 0.00303935        | 0.00303935           | 3.08493            | 3.08493                      | T up vs N                              | 12.166  | 11.8863   | 15.6316    | 1         |
| cg17296483  | WIZ                                                            | 7.68E-05          | 7.68E-05             | 0.32248            | -3.10097                     | T down vs N                            | 27.735  | 11.996    | 6.92037    | 1         |
| cg17297238  | PCDHGA4;PCDHGC3;PCDHGA12;PCDH<br>GA11;PCDHGA11;PCDHGA9;PCDHGA1 | 0.00309717        | 0.00309717           | 3.59368            | 3.59368                      | T up vs N                              | 12.104  | 15.3258   | 20.2584    | 1         |
| cg17297634  | SCARA5                                                         | 0.00040299        | 0.000402988          | 0.31306            | -3.19427                     | T down vs N                            | 19.805  | 12.6327   | 10.2059    | 1         |
| cg17298352  | AKAP13;AKAP13;AKAP13                                           | 7.34E-05          | 7.34E-05             | 0.261834           | -3.81922                     | T down vs N                            | 27.975  | 16.819    | 9.6196     | 1         |
| cg17299007  | OR2T27                                                         | 1.65E-05          | 1.65E-05             | 0.302242           | -3.30861                     | T down vs N                            | 36.723  | 13.4094   | 5.84246    | 1         |
| cg17299616  | ZFR2                                                           | 9.78E-07          | 9.78E-07             | 0.251835           | -3.97085                     | T down vs N                            | 58.594  | 17.8106   | 4.86342    | 1         |
| cg17300870  | FRMD4A                                                         | 0.0004212         | 0.000421198          | 0.329332           | -3.03645                     | T down vs N                            | 19.615  | 11.5544   | 9.42481    | 1         |
| cg17301842  | GUCY2D                                                         | 0.00090453        | 0.000904528          | 3.45854            | 3.45854                      | T up vs N                              | 16.506  | 14.4211   | 13.9789    | 1         |
| cg17302455  | ABCA5                                                          | 3.43E-06          | 3.43E-06             | 0.263689           | -3.79235                     | T down vs N                            | 47.919  | 16.6423   | 5.5568     | 1         |
| cg17306339  | ATP6V0A2                                                       | 0.00261556        | 0.00261556           | 0.275806           | -3.62573                     | T down vs N                            | 12.667  | 15.5393   | 19.6274    | 1         |
| cg17306637  | TFB1M;CLDN20                                                   | 0.00110109        | 0.00110109           | 3.73772            | 3.73772                      | T up vs N                              | 15.755  | 16.2819   | 16.5356    | 1         |
| cg17306740  | ZBP1;ZBP1;ZBP1;ZBP1;ZBP1;ZBP1                                  | 0.00058397        | 0.000583966          | 0.297666           | -3.35947                     | T down vs N                            | 18.249  | 13.7534   | 12.0587    | 1         |
| cg17308044  | LOC388796;LOC388796                                            | 0.00153002        | 0.00153002           | 0.312411           | -3.20091                     | T down vs N                            | 14.539  | 12.6779   | 13.9515    | 1         |
| cg17308606  | FAM102A;FAM102A                                                | 0.00095775        | 0.00095775           | 3.7232             | 3.7232                       | T up vs N                              | 16.286  | 16.186    | 15.9021    | 1         |
| cg17314180  | CRYGB                                                          | 1.47E-05          | 1.47E-05             | 0.252403           | -3.96192                     | T down vs N                            | 37.481  | 17.7524   | 7.5783     | 1         |
| cg17315844  | FAM173B;CCT5                                                   | 4.63E-05          | 4.63E-05             | 0.101075           | -9.8936                      | T down vs N                            | 30.507  | 49.1981   | 25.8033    | 1         |
| cg17316649  | HLA-DRB1                                                       | 0.00270836        | 0.00270836           | 6.35393            | 6.35393                      | T up vs N                              | 12.55   | 32.0236   | 40.8262    | 1         |
| cg17320707  | EMX2;EMX2                                                      | 0.001161          | 0.001161             | 0.23664            | -4.22583                     | T down vs N                            | 15.555  | 19.4545   | 20.0107    | 1         |
| cg17321814  | SORCS3                                                         | 0.00014764        | 0.000147641          | 18.5271            | 18.5271                      | T up vs N                              | 24.407  | 79.8177   | 52.3253    | 1         |
| cg17330251  | PON1                                                           | 0.00019301        | 0.000193011          | 4.31863            | 4.31863                      | T up vs N                              | 23.12   | 20.0454   | 13.8721    | 1         |
| cg17330765  | CNKSRI1;CNKSRI1                                                | 7.22E-06          | 7.22E-06             | 5.69934            | 5.69934                      | T up vs N                              | 42.349  | 28.3684   | 10.7179    | 1         |
| cg17333767  | CECR1;CECR1                                                    | 0.00023625        | 0.000236254          | 5.2972             | 5.2972                       | T up vs N                              | 22.179  | 26.0331   | 18.7808    | 1         |
| cg17335494  | LTBP2                                                          | 0.00012417        | 0.000124172          | 3.06708            | 3.06708                      | T up vs N                              | 25.261  | 11.7642   | 7.45119    | 1         |
| cg17336139  | PRAME;PRAME;PRAME;PRAME;LOC64<br>8691;PRAME;PRAME;PRAME;PRAME  | 0.00061137        | 0.000611366          | 0.159324           | -6.27653                     | T down vs N                            | 18.061  | 31.6005   | 27.9939    | 1         |
| cg17336615  | IRF4                                                           | 2.21E-05          | 2.21E-05             | 0.212893           | -4.69719                     | T down vs N                            | 34.896  | 22.4141   | 10.2771    | 1         |
| cg17337672  | FGFR2;FGFR2;FGFR2;FGFR2;FGFR2;FG                               | 0.00241157        | 0.00241157           | 3.03557            | 3.03557                      | T up vs N                              | 12.943  | 11.5484   | 14.2765    | 1         |
| cg17339202  | SYNC;SYNC                                                      | 0.00046814        | 0.000468136          | 0.260513           | -3.83858                     | T down vs N                            | 19.167  | 16.9462   | 14.1461    | 1         |
| cg17339327  | STK19;STK19;DOM3Z;STK19                                        | 4.55E-06          | 4.55E-06             | 0.152634           | -6.55161                     | T down vs N                            | 45.742  | 33.0936   | 11.5758    | 1         |
| cg17340519  | CNIH3                                                          | 0.0059301         | 0.0059301            | 3.17513            | 3.17513                      | T up vs N                              | 10.054  | 12.5023   | 19.8958    | 1         |
| cg17341370  | NUP43                                                          | 5.25E-05          | 5.25E-05             | 0.244829           | -4.08449                     | T down vs N                            | 29.807  | 18.5469   | 9.95584    | 1         |
| cg17346246  | GPR81                                                          | 6.81E-06          | 6.81E-06             | 0.121945           | -8.20044                     | T down vs N                            | 42.768  | 41.4697   | 15.5143    | 1         |
| cg17347386  | GLI3                                                           | 1.26E-05          | 1.26E-05             | 0.221266           | -4.51945                     | T down vs N                            | 38.482  | 21.3102   | 8.8603     | 1         |
| cg17348378  | FAM169B                                                        | 2.32E-07          | 2.32E-07             | 0.285021           | -3.50851                     | T down vs N                            | 73.101  | 14.7564   | 3.2298     | 1         |
| cg17349199  | C10orf82;C10orf82                                              | 1.43E-05          | 1.43E-05             | 3.71234            | 3.71234                      | T up vs N                              | 37.668  | 16.1141   | 6.84477    | 1         |
| cg17351862  | BHLHA9                                                         | 3.11E-05          | 3.11E-05             | 0.216949           | -4.60938                     | T down vs N                            | 32.815  | 21.8707   | 10.6636    | 1         |
| cg17352276  | SNORD16;RPL4;SNORD18B                                          | 0.00314151        | 0.00314151           | 0.27609            | -4.39349                     | T down vs N                            | 12.058  | 20.5191   | 27.2284    | 1         |
| cg17352422  | TGM2;TGM2                                                      | 0.00139995        | 0.00139995           | 0.297928           | -3.35652                     | T down vs N                            | 14.862  | 13.7335   | 14.7847    | 1         |
| cg17354987  | SRGA1P1                                                        | 4.73E-05          | 4.73E-05             | 0.246406           | -4.05835                     | T down vs N                            | 30.387  | 18.378    | 9.67683    | 1         |
| cg17355877  | PRKCZ                                                          | 0.00012266        | 0.000122662          | 0.29001            | -3.44815                     | T down vs N                            | 25.322  | 14.3513   | 9.06787    | 1         |
| cg17358127  | TRAM1L1                                                        | 1.43E-05          | 1.43E-05             | 0.149034           | -6.70987                     | T down vs N                            | 37.672  | 33.9394   | 14.4148    | 1         |
| cg17360680  | KRT1                                                           | 2.25E-05          | 2.25E-05             | 0.232608           | -4.29909                     | T down vs N                            | 34.773  | 19.9212   | 9.16626    | 1         |
| cg17360854  | RBMS1;RBMS1                                                    | 0.00197419        | 0.00197419           | 0.173634           | -5.75923                     | T down vs N                            | 13.633  | 28.7102   | 33.6947    | 1         |
| cg17369513  | RGMB                                                           | 0.00401249        | 0.00401249           | 0.317398           | -3.15062                     | T down vs N                            | 11.266  | 12.3351   | 17.5189    | 1         |
| cg17370987  | KIFC1                                                          | 0.00027643        | 0.000276432          | 0.292463           | -3.41924                     | T down vs N                            | 21.463  | 14.1566   | 10.5532    | 1         |
| cg17372758  | ASCC1;C10orf104                                                | 9.02E-05          | 9.02E-05             | 0.306772           | -3.25975                     | T down vs N                            | 26.892  | 13.0779   | 7.78105    | 1         |
| cg17375267  | CCDC8                                                          | 0.00055308        | 0.000553076          | 4.70795            | 4.70795                      | T up vs N                              | 18.472  | 22.4805   | 19.4721    | 1         |
| cg17377797  | OR6C1                                                          | 2.73E-07          | 2.73E-07             | 0.272289           | -3.67256                     | T down vs N                            | 71.322  | 15.8505   | 3.55583    | 1         |
| cg17379532  | ZNF618                                                         | 0.00107036        | 0.00107036           | 0.252748           | -3.9565                      | T down vs N                            | 15.862  | 17.7172   | 17.8718    | 1         |
| cg17382459  | NLRP4;NLRP4;NLRP11                                             | 3.76E-06          | 3.76E-06             | 0.273463           | -3.6568                      | T down vs N                            | 47.213  | 15.7458   | 5.33614    | 1         |
| cg17384076  | FLOT1                                                          | 3.47E-05          | 3.47E-05             | 0.304606           | -3.28292                     | T down vs N                            | 32.165  | 13.2352   | 6.58371    | 1         |
| cg17384457  | CEACAM20;CEACAM20;CEACAM20;CE                                  | 0.00302455        | 0.00302455           | 0.276481           | -3.61688                     | T down vs N                            | 12.183  | 15.4804   | 20.3312    | 1         |
| cg17384769  | ACAM20                                                         | 4.48E-05          | 4.48E-05             | 0.217891           | -4.58944                     | T down vs N                            | 30.695  | 21.7467   | 11.3356    | 1         |
| cg17386213  | UST                                                            | 0.00224863        | 0.00224863           | 0.140288           | -7.12821                     | T down vs N                            | 13.182  | 36.1302   | 43.8545    | 1         |
| cg17388996  | NR2E1                                                          | 7.48E-06          | 7.48E-06             | 0.228731           | -4.37195                     | T down vs N                            | 42.096  | 20.3831   | 7.74724    | 1         |
| cg17389150  | SCML4;SCML4                                                    | 0.00105872        | 0.00105872           | 0.288827           | -3.46228                     | T down vs N                            | 15.903  | 14.4462   | 14.5344    | 1         |
| cg17389988  | TLE2;TLE2;TLE2                                                 | 3.96E-05          | 3.96E-05             | 0.326124           | -3.06632                     | T down vs N                            | 32.863  | 11.0672   | 5.05158    | 1         |
| cg17390562  | C7orf10                                                        | 3.75E-06          | 3.75E-06             | 0.280246           | -3.5683                      | T down vs N                            | 47.227  | 15.1564   | 5.13487    | 1         |
| cg17392201  | EZR;EZR                                                        | 0.00023983        | 0.000239831          | 0.226963           | -4.40601                     | T down vs N                            | 22.109  | 20.598    | 14.9062    | 1         |
| cg17394306  | MIR1323                                                        | 0.00156947        | 0.00156947           | 0.229378           | -4.35962                     | T down vs N                            | 14.448  | 20.3051   | 22.487     | 1         |
| cg17395064  | GPR78                                                          | 0.00020689        | 0.000206885          | 17.8352            | 17.8352                      | T up vs N                              | 22.794  | 77.75     | 54.5754    | 1         |
| cg17397672  | TXNRD1                                                         | 7.89E-05          | 7.89E-05             | 0.161899           | -6.1767                      | T down vs N                            | 27.592  | 31.0512   | 18.0056    | 1         |
| cg17399362  | PRSSL1;PRSSL1                                                  | 2.15E-05          | 2.15E-05             | 20.2278            | 20.2278                      | T up vs N                              | 35.053  | 84.6927   | 38.6586    | 1         |
| cg17401179  | EPHX3;EPHX3                                                    | 6.62E-07          | 6.62E-07             | 0.285179           | -3.50657                     | T down vs N                            | 62.27   | 14.7434   | 3.78825    | 1         |

| Probeset ID | UCSC_REFGENE_NAME                                                                       | p-value<br>(Type) | p-value (T vs.<br>N) | Ratio (T<br>vs. N) | Fold-<br>Change (T<br>vs. N) | Fold-Change (T vs.<br>N) (Description) | F(Type) | SS (Type) | SS (Error) | F (Error) |
|-------------|-----------------------------------------------------------------------------------------|-------------------|----------------------|--------------------|------------------------------|----------------------------------------|---------|-----------|------------|-----------|
| cg17401837  | MAGEB1;MAGEB1;MAGEB4                                                                    | 0.00016793        | 0.000167926          | 0.193603           | -5.16521                     | T down vs N                            | 23.783  | 25.2511   | 16.9875    | 1         |
| cg17402397  | SMTN;SMTN;SMTN                                                                          | 1.25E-07          | 1.25E-07             | 0.255698           | -3.91087                     | T down vs N                            | 80.203  | 17.4195   | 3.47512    | 1         |
| cg17403974  | AGTR2                                                                                   | 0.00215215        | 0.00215215           | 0.258395           | -3.87005                     | T down vs N                            | 13.333  | 17.1525   | 20.5835    | 1         |
| cg17405000  | IL31RA                                                                                  | 0.00029583        | 0.000295829          | 0.326756           | -3.06039                     | T down vs N                            | 21.159  | 11.7183   | 8.86117    | 1         |
| cg17405178  | CDKAL1                                                                                  | 0.00032746        | 0.000327455          | 0.230371           | -4.34082                     | T down vs N                            | 20.708  | 20.186    | 15.5966    | 1         |
| cg17406248  | C9orf3                                                                                  | 2.12E-06          | 2.12E-06             | 5.20077            | 5.20077                      | T up vs N                              | 51.809  | 25.4625   | 7.86356    | 1         |
| cg17406359  | TRPM2                                                                                   | 3.57E-06          | 3.57E-06             | 0.324298           | -3.08359                     | T down vs N                            | 47.617  | 11.8771   | 3.99087    | 1         |
| cg17407455  | DLGAP2                                                                                  | 0.00403843        | 0.00403843           | 0.287016           | -3.48413                     | T down vs N                            | 11.245  | 14.5929   | 20.7633    | 1         |
| cg17408380  | RPL23A;SNORD4A;SNORD42A                                                                 | 1.24E-05          | 1.24E-05             | 0.276961           | -3.61061                     | T down vs N                            | 38.619  | 15.4386   | 6.39636    | 1         |
| cg17411190  | CLDN5;CLDN5;CLDN5                                                                       | 7.59E-05          | 7.59E-05             | 6.24529            | 6.24529                      | T up vs N                              | 27.795  | 31.429    | 18.0918    | 1         |
| cg17412005  | MUTYH;MUTYH;MUTYH;TOE1;MUTYH                                                            | 0.00114821        | 0.00114821           | 0.216066           | -4.62821                     | T down vs N                            | 15.597  | 21.9875   | 22.5558    | 1         |
| cg17417496  | GDF5                                                                                    | 0.00424581        | 0.00424581           | 0.306594           | -3.26165                     | T down vs N                            | 11.086  | 13.0908   | 18.8928    | 1         |
| cg17419299  | RB1                                                                                     | 0.00573777        | 0.00573777           | 0.32756            | -3.05288                     | T down vs N                            | 10.154  | 11.6669   | 18.384     | 1         |
| cg17421062  | S100A7                                                                                  | 3.03E-05          | 3.03E-05             | 0.281008           | -3.55861                     | T down vs N                            | 32.961  | 15.0917   | 7.3258     | 1         |
| cg17421805  | FCRL6                                                                                   | 0.00016859        | 0.000168589          | 0.25396            | -3.93762                     | T down vs N                            | 23.764  | 17.5942   | 11.8458    | 1         |
| cg17423978  | SIRPD                                                                                   | 0.00445333        | 0.00445333           | 0.278423           | -3.59166                     | T down vs N                            | 10.936  | 15.3123   | 22.4025    | 1         |
| cg17426192  | NEURL                                                                                   | 0.00071017        | 0.00071017           | 4.02177            | 4.02177                      | T up vs N                              | 17.457  | 18.1412   | 16.6269    | 1         |
| cg17428519  | NKPD1                                                                                   | 3.10E-05          | 3.10E-05             | 0.288185           | -3.46999                     | T down vs N                            | 32.843  | 14.498    | 7.06285    | 1         |
| cg17429870  | BRSK2                                                                                   | 6.74E-05          | 6.74E-05             | 3.28102            | 3.28102                      | T up vs N                              | 28.43   | 13.2223   | 7.44127    | 1         |
| cg17431922  | AKR7L;AKR7L                                                                             | 0.00077153        | 0.000771531          | 0.235603           | -4.24443                     | T down vs N                            | 17.128  | 19.5732   | 18.2841    | 1         |
| cg17432154  | FRG2B                                                                                   | 4.02E-05          | 4.02E-05             | 0.212503           | -4.70581                     | T down vs N                            | 31.312  | 22.4673   | 11.4804    | 1         |
| cg17432598  | FBRSL1                                                                                  | 1.67E-07          | 1.67E-07             | 0.285533           | -3.50222                     | T down vs N                            | 76.758  | 14.7143   | 3.06717    | 1         |
| cg17435901  | SLC39A7;RXRB;SLC39A7                                                                    | 3.19E-05          | 3.19E-05             | 0.156441           | -6.39218                     | T down vs N                            | 32.656  | 23.2318   | 15.7921    | 1         |
| cg17443668  | RPTN                                                                                    | 5.36E-08          | 5.36E-08             | 0.131822           | -7.58601                     | T down vs N                            | 90.785  | 38.4567   | 6.77764    | 1         |
| cg17443821  | USP50                                                                                   | 0.00029832        | 0.000298317          | 0.219572           | -4.55431                     | T down vs N                            | 21.122  | 21.528    | 16.3078    | 1         |
| cg17444904  | PRR15                                                                                   | 1.03E-06          | 1.03E-06             | 15.9559            | 15.9559                      | T up vs N                              | 58.141  | 71.8566   | 19.7746    | 1         |
| cg17445840  | FAM55C;FAM55C;NFKBIZ                                                                    | 0.00041323        | 0.000413233          | 0.279401           | -3.57908                     | T down vs N                            | 19.697  | 15.2284   | 12.3702    | 1         |
| cg17449954  | HEYL                                                                                    | 0.00033114        | 0.000331141          | 6.09759            | 6.09759                      | T up vs N                              | 20.659  | 30.6131   | 23.7096    | 1         |
| cg17451015  | TRIM10;TRIM10                                                                           | 1.84E-06          | 1.84E-06             | 0.156524           | -6.3888                      | T down vs N                            | 53.024  | 32.2134   | 9.72046    | 1         |
| cg17451419  | CYR61                                                                                   | 0.00035787        | 0.000357874          | 0.311927           | -3.20588                     | T down vs N                            | 20.318  | 12.7117   | 10.01      | 1         |
| cg17452006  | OLA1;OLA1                                                                               | 0.00016871        | 0.000168706          | 0.263653           | -3.79287                     | T down vs N                            | 23.761  | 16.6457   | 11.2088    | 1         |
| cg17454920  | C14orf43;C14orf43                                                                       | 7.45E-05          | 7.45E-05             | 6.31414            | 6.31414                      | T up vs N                              | 27.894  | 31.8063   | 18.2439    | 1         |
| cg17455261  | AFF1                                                                                    | 0.0013658         | 0.0013658            | 0.298121           | -3.35435                     | T down vs N                            | 14.953  | 13.7188   | 14.6795    | 1         |
| cg17458357  | MRPS14                                                                                  | 0.00277019        | 0.00277019           | 0.276213           | -3.62039                     | T down vs N                            | 12.475  | 15.5037   | 19.8852    | 1         |
| cg17458486  | NCF1B                                                                                   | 0.00014011        | 0.000140112          | 0.230813           | -4.33252                     | T down vs N                            | 24.663  | 20.1334   | 13.0614    | 1         |
| cg17461336  | CYP3A43;CYP3A43;CYP3A43                                                                 | 8.11E-07          | 8.11E-07             | 0.219846           | -4.54864                     | T down vs N                            | 60.338  | 21.4926   | 5.69923    | 1         |
| cg17462391  | FAIM;FAIM;FAIM;FAIM                                                                     | 1.42E-05          | 1.42E-05             | 0.263422           | -3.79619                     | T down vs N                            | 37.723  | 16.6676   | 7.06944    | 1         |
| cg17463149  | PKP1;PKP1                                                                               | 6.94E-05          | 6.94E-05             | 8.97772            | 8.97772                      | T up vs N                              | 28.275  | 45.116    | 25.5299    | 1         |
| cg17463698  | WHAMM                                                                                   | 5.86E-05          | 5.86E-05             | 0.257645           | -3.88131                     | T down vs N                            | 29.19   | 17.2263   | 9.44237    | 1         |
| cg17464989  | JSRP1                                                                                   | 5.13E-06          | 5.13E-06             | 0.200712           | -4.98227                     | T down vs N                            | 44.844  | 24.1541   | 8.61791    | 1         |
| cg17468569  | NOS1AP;NOS1AP                                                                           | 2.85E-05          | 2.85E-05             | 0.218244           | -4.58203                     | T down vs N                            | 33.329  | 21.7006   | 10.4175    | 1         |
| cg17468773  | BAI1                                                                                    | 0.00019967        | 0.000199673          | 0.280564           | -3.56425                     | T down vs N                            | 22.961  | 15.1294   | 10.5429    | 1         |
| cg17469265  | WDR19                                                                                   | 3.07E-05          | 3.07E-05             | 0.222134           | -4.50178                     | T down vs N                            | 32.889  | 21.1997   | 10.3133    | 1         |
| cg17470497  | OR2M4                                                                                   | 2.66E-05          | 2.66E-05             | 0.204607           | -4.88742                     | T down vs N                            | 33.758  | 23.5793   | 11.1757    | 1         |
| cg17471365  | HLA-DQA2                                                                                | 0.00027892        | 0.000278921          | 0.195595           | -5.1126                      | T down vs N                            | 22.188  | 23.4703   | 15.8667    | 1         |
| cg17471720  | TBL1X;TBL1X;TBL1X;TBL1X                                                                 | 0.0004533         | 0.000453298          | 0.30735            | -3.25362                     | T down vs N                            | 19.303  | 13.0363   | 10.8056    | 1         |
| cg17474422  | TFAP2E                                                                                  | 0.00023277        | 0.000232771          | 4.23404            | 4.23404                      | T up vs N                              | 22.247  | 19.5069   | 14.0294    | 1         |
| cg17476701  | KIAA1949;KIAA1949                                                                       | 2.66E-05          | 2.66E-05             | 0.177609           | -5.63033                     | T down vs N                            | 33.743  | 27.9727   | 13.2639    | 1         |
| cg17477700  | PGCP                                                                                    | 0.00014937        | 0.00014937           | 0.324092           | -3.08554                     | T down vs N                            | 24.35   | 11.8905   | 7.8131     | 1         |
| cg17478979  | ZC3H12D                                                                                 | 5.18E-06          | 5.18E-06             | 28.4963            | 28.4963                      | T up vs N                              | 44.776  | 105.098   | 37.5549    | 1         |
| cg17480803  | HCG27                                                                                   | 0.00085161        | 0.00085161           | 0.288331           | -3.46824                     | T down vs N                            | 16.74   | 14.4863   | 13.8456    | 1         |
| cg17482089  | PCDHA6;PCDHA2;PCDHA1;PCDHA9;PCDHA7;PCDHA1;PCDHA6;PCDHA5;PCDHA11;PCDHA11;PCDHA10;PCDHA3; | 1.21E-06          | 1.21E-06             | 6.96769            | 6.96769                      | T up vs N                              | 56.672  | 35.2971   | 9.96528    | 1         |
| cg17482649  | TSPYL2                                                                                  | 0.00211865        | 0.00211865           | 3.67696            | 3.67696                      | T up vs N                              | 13.387  | 15.8796   | 18.9787    | 1         |
| cg17485681  | CDH23                                                                                   | 2.24E-05          | 2.24E-05             | 4.54804            | 4.54804                      | T up vs N                              | 34.819  | 21.4889   | 9.87456    | 1         |
| cg17486946  | FGF8;FGF8;FGF8;FGF8                                                                     | 0.00216064        | 0.00216064           | 0.301211           | -3.31993                     | T down vs N                            | 13.319  | 13.486    | 16.2001    | 1         |
| cg17488500  | ATP8B2;ATP8B2                                                                           | 0.00028825        | 0.000288249          | 0.27655            | -3.61598                     | T down vs N                            | 21.275  | 15.4744   | 11.6375    | 1         |
| cg17491560  | FLJ33360                                                                                | 1.22E-07          | 1.22E-07             | 0.234899           | -4.25714                     | T down vs N                            | 80.494  | 19.6543   | 3.90672    | 1         |
| cg17493885  | NSD1;NSD1                                                                               | 4.64E-05          | 4.64E-05             | 28.3565            | 28.3565                      | T up vs N                              | 30.494  | 104.789   | 54.9819    | 1         |
| cg17496990  | SPINK5L2                                                                                | 0.00042851        | 0.000428512          | 0.280368           | -3.56675                     | T down vs N                            | 19.542  | 15.146    | 12.4009    | 1         |
| cg17497052  | PUS3;HYLS1;HYLS1                                                                        | 0.00054269        | 0.00054269           | 0.273813           | -3.65213                     | T down vs N                            | 18.55   | 15.7148   | 13.5544    | 1         |
| cg17497172  | DEFB123                                                                                 | 0.00017147        | 0.000171469          | 0.24548            | -4.07365                     | T down vs N                            | 23.683  | 18.4769   | 12.4828    | 1         |
| cg17497608  | FZD1;FZD1                                                                               | 2.03E-05          | 2.03E-05             | 7.54241            | 7.54241                      | T up vs N                              | 35.434  | 38.2382   | 17.2664    | 1         |
| cg17498476  | MAD1L1;MAD1L1;MAD1L1                                                                    | 0.00036955        | 0.00036955           | 0.288572           | -3.46534                     | T down vs N                            | 20.179  | 14.4668   | 11.4709    | 1         |
| cg17500228  | EXOC3                                                                                   | 0.00010045        | 0.000100447          | 0.262577           | -3.80841                     | T down vs N                            | 26.334  | 16.7479   | 10.1757    | 1         |
| cg17501380  | COL6A3;COL6A3;COL6A3                                                                    | 8.05E-06          | 8.05E-06             | 0.278588           | -3.58954                     | T down vs N                            | 41.574  | 15.2982   | 5.88754    | 1         |
| cg17508549  | LAGE3                                                                                   | 0.00627008        | 0.00627008           | 3.4527             | 3.4527                       | T up vs N                              | 9.8865  | 14.3818   | 23.2752    | 1         |

| Probeset ID | UCSC_REFGENE_NAME                                                     | p-value<br>(Type) | p-value (T vs.<br>N) | Ratio (T<br>vs. N) | Fold-<br>Change (T<br>vs. N) | Fold-Change (T vs.<br>N) (Description) | F(Type) | SS (Type) | SS (Error) | F (Error) |
|-------------|-----------------------------------------------------------------------|-------------------|----------------------|--------------------|------------------------------|----------------------------------------|---------|-----------|------------|-----------|
|             | PCDHA6;PCDHA2;PCDHA1;PCDHA7;PCDHA1;PCDHA6;PCDHA5;PCDHA3;PCDHA4;PCDHA7 |                   |                      |                    |                              |                                        |         |           |            |           |
| cg17508591  | HA4;PCDHA7                                                            | 2.37E-05          | 2.37E-05             | 3.87276            | 3.87276                      | T up vs N                              | 34.46   | 17.1703   | 7.97224    | 1         |
| cg17508639  | PINK1                                                                 | 0.00583465        | 0.00583465           | 0.332406           | -3.00837                     | T down vs N                            | 10.103  | 11.3619   | 17.9932    | 1         |
| cg17511873  | FAM136B                                                               | 1.31E-06          | 1.31E-06             | 0.263943           | -3.78869                     | T down vs N                            | 55.988  | 16.6182   | 4.74906    | 1         |
| cg17512802  | FRAS1;FRAS1                                                           | 0.00019665        | 0.000196646          | 0.269434           | -3.71149                     | T down vs N                            | 23.032  | 16.1085   | 11.1901    | 1         |
| cg17514168  | OR2T11                                                                | 0.00063147        | 0.000631471          | 0.247974           | -4.03269                     | T down vs N                            | 17.93   | 18.212    | 16.2517    | 1         |
| cg17514199  | LOC100130331;ZP4                                                      | 0.00056315        | 0.000563153          | 0.164328           | -6.08539                     | T down vs N                            | 18.398  | 30.5453   | 26.5647    | 1         |
| cg17514558  | PCDHB19P                                                              | 0.00018017        | 0.000180171          | 8.61902            | 8.61902                      | T up vs N                              | 23.447  | 43.4552   | 29.6539    | 1         |
| cg17514766  | GMFG                                                                  | 3.08E-05          | 3.08E-05             | 0.103068           | -9.70236                     | T down vs N                            | 32.877  | 48.3637   | 23.5368    | 1         |
| cg17515767  | ADPRHL1;ADPRHL1                                                       | 0.00674158        | 0.00674158           | 0.239655           | -4.17267                     | T down vs N                            | 9.6702  | 19.1142   | 31.6258    | 1         |
| cg17515793  | SCAND3                                                                | 0.00037635        | 0.000376352          | 0.207168           | -4.82699                     | T down vs N                            | 20.1    | 23.211    | 18.4768    | 1         |
| cg17518550  | C1orf150                                                              | 8.75E-07          | 8.75E-07             | 0.084871           | -11.7825                     | T down vs N                            | 59.627  | 56.9857   | 15.2913    | 1         |
| cg17518842  | TRAF3IP3                                                              | 1.79E-05          | 1.79E-05             | 0.17855            | -5.60068                     | T down vs N                            | 36.223  | 27.802    | 12.2804    | 1         |
| cg17518965  | S1PR4                                                                 | 2.35E-05          | 2.35E-05             | 0.220257           | -4.54015                     | T down vs N                            | 34.5    | 21.4396   | 9.94314    | 1         |
| cg17520000  | AKR1CL1                                                               | 2.45E-05          | 2.45E-05             | 0.224245           | -4.45942                     | T down vs N                            | 34.26   | 20.9341   | 9.77655    | 1         |
| cg17520909  | CRP                                                                   | 2.55E-08          | 2.55E-08             | 0.091177           | -10.9676                     | T down vs N                            | 101.1   | 53.7222   | 8.50186    | 1         |
| cg17521665  | PRDM1;PRDM1                                                           | 1.66E-07          | 1.66E-07             | 0.208072           | -4.80603                     | T down vs N                            | 76.847  | 23.0828   | 4.80598    | 1         |
| cg17523501  | C19orf29;C19orf29                                                     | 0.00174003        | 0.00174003           | 0.270898           | -3.69143                     | T down vs N                            | 14.078  | 15.9756   | 18.1563    | 1         |
| cg17523840  | USP51                                                                 | 0.00175177        | 0.00175177           | 0.2638             | -3.79075                     | T down vs N                            | 14.054  | 16.6318   | 18.9342    | 1         |
| cg17527766  | CRYBG3                                                                | 9.39E-07          | 9.39E-07             | 0.195097           | -5.12565                     | T down vs N                            | 58.97   | 25.0151   | 6.78719    | 1         |
| cg17528580  | MYPN                                                                  | 9.76E-06          | 9.76E-06             | 0.20952            | -4.77282                     | T down vs N                            | 40.237  | 22.8794   | 9.09784    | 1         |
| cg17529058  | FADS6                                                                 | 0.00014288        | 0.000142878          | 0.278552           | -3.58999                     | T down vs N                            | 24.567  | 15.3012   | 9.96533    | 1         |
| cg17529716  | MICA                                                                  | 0.00101576        | 0.00101576           | 0.245119           | -4.07965                     | T down vs N                            | 16.061  | 18.5156   | 18.4459    | 1         |
| cg17533927  | KCP;KCP                                                               | 0.00022223        | 0.000222229          | 4.49425            | 4.49425                      | T up vs N                              | 22.461  | 21.1526   | 15.0679    | 1         |
| cg17541674  | ACPT                                                                  | 0.00292453        | 0.00292453           | 0.324979           | -3.07713                     | T down vs N                            | 12.294  | 11.8329   | 15.3999    | 1         |
| cg17542330  | SERINC5                                                               | 0.00042427        | 0.00042427           | 0.319417           | -3.1307                      | T down vs N                            | 19.584  | 12.1991   | 9.96647    | 1         |
| cg17542852  | FLG2                                                                  | 0.00078076        | 0.00078076           | 0.305241           | -3.2761                      | T down vs N                            | 17.081  | 13.189    | 12.3542    | 1         |
| cg17545418  | MT1IP                                                                 | 3.71E-06          | 3.71E-06             | 9.74335            | 9.74335                      | T up vs N                              | 47.326  | 48.5433   | 16.4117    | 1         |
| cg17548395  | BICC1                                                                 | 0.00286655        | 0.00286655           | 0.31545            | -3.17007                     | T down vs N                            | 12.361  | 12.4678   | 16.1388    | 1         |
| cg17551002  | OR6Y1                                                                 | 1.51E-05          | 1.51E-05             | 0.169444           | -5.90164                     | T down vs N                            | 37.324  | 29.5169   | 12.6532    | 1         |
| cg17551891  | MAD1L1;MAD1L1;MAD1L1                                                  | 0.00031846        | 0.000318457          | 0.212048           | -4.7159                      | T down vs N                            | 20.831  | 22.5295   | 17.3045    | 1         |
| cg17552088  | ZFAND3                                                                | 0.0006764         | 0.000676401          | 0.296997           | -3.36703                     | T down vs N                            | 17.652  | 13.8045   | 12.5123    | 1         |
| cg17553300  | WNT5A                                                                 | 0.00116709        | 0.00116709           | 7.64076            | 7.64076                      | T up vs N                              | 15.536  | 38.7301   | 39.8876    | 1         |
| cg17554685  | NCRNA00171                                                            | 1.30E-05          | 1.30E-05             | 0.237567           | -4.20935                     | T down vs N                            | 38.324  | 19.3491   | 8.07821    | 1         |
| cg17554896  | SMC4;SMC4;MIR16-2;MIR15B                                              | 0.00011067        | 0.000110673          | 0.224966           | -4.44512                     | T down vs N                            | 25.84   | 20.8443   | 12.9067    | 1         |
| cg17555712  | KIAA0226;KIAA0226                                                     | 0.00423784        | 0.00423784           | 0.268366           | -3.72626                     | T down vs N                            | 13.551  | 10.504    | 7.75123    | 1         |
| cg17556421  | RIMBP2                                                                | 4.23E-05          | 4.23E-05             | 0.304766           | -3.2812                      | T down vs N                            | 31.018  | 13.2235   | 6.82113    | 1         |
| cg17557870  | MRPS25                                                                | 6.10E-07          | 6.10E-07             | 0.199295           | -5.01768                     | T down vs N                            | 63.061  | 24.3676   | 6.18267    | 1         |
| cg17558268  | FNDC3B;FNDC3B                                                         | 0.000133          | 0.000133003          | 0.262458           | -3.81014                     | T down vs N                            | 24.92   | 16.7593   | 10.7605    | 1         |
| cg17559156  | SLC43A1                                                               | 1.48E-05          | 1.48E-05             | 0.176278           | -5.67285                     | T down vs N                            | 37.466  | 28.2167   | 12.05      | 1         |
| cg17560332  | BOLL;BOLL                                                             | 0.00268845        | 0.00268845           | 3.99235            | 3.99235                      | T up vs N                              | 12.575  | 17.9503   | 22.8394    | 1         |
| cg17560523  | EIF2C2;EIF2C2                                                         | 0.00222961        | 0.00222961           | 4.22288            | 4.22288                      | T up vs N                              | 13.211  | 19.4356   | 23.5386    | 1         |
| cg17562433  | DNAI2                                                                 | 0.00127205        | 0.00127205           | 0.288335           | -3.46819                     | T down vs N                            | 15.215  | 14.4859   | 15.2333    | 1         |
| cg17563034  | CYTL1                                                                 | 3.15E-05          | 3.15E-05             | 0.226737           | -4.4104                      | T down vs N                            | 32.741  | 20.6257   | 10.0795    | 1         |
| cg17568809  | ARHGAP26;ARHGAP26                                                     | 0.00013566        | 0.000135659          | 0.273995           | -3.64971                     | T down vs N                            | 24.822  | 15.6987   | 10.1192    | 1         |
| cg17568996  | NFAM1                                                                 | 0.0073473         | 0.0073473            | 0.271578           | -3.68218                     | T down vs N                            | 9.4163  | 15.9143   | 27.0412    | 1         |
| cg17569032  | CALCB                                                                 | 8.36E-05          | 8.36E-05             | 0.278348           | -3.59263                     | T down vs N                            | 27.286  | 15.3188   | 8.98281    | 1         |
|             | MAPT;MAPT;MAPT;MAPT;MAPT;MAP                                          |                   |                      |                    |                              |                                        |         |           |            |           |
| cg17569492  | T                                                                     | 0.00087881        | 0.000878814          | 5.62352            | 5.62352                      | T up vs N                              | 16.618  | 27.9335   | 26.8948    | 1         |
| cg17573292  | SOD3                                                                  | 0.00014939        | 0.000149385          | 8.2575             | 8.2575                       | T up vs N                              | 24.349  | 41.7435   | 27.4297    | 1         |
| cg17574739  | SYCN                                                                  | 0.0007674         | 0.000767397          | 3.03382            | 3.03382                      | T up vs N                              | 17.149  | 11.5364   | 10.7633    | 1         |
| cg17577122  | CLDN5;CLDN5                                                           | 1.15E-05          | 1.15E-05             | 16.115             | 16.115                       | T up vs N                              | 39.103  | 72.3725   | 29.6135    | 1         |
|             | RAPGEF6;RAPGEF6;RAPGEF6;RAPGEF6                                       |                   |                      |                    |                              |                                        |         |           |            |           |
| cg17578380  | ;RAPGEF6;RAPGEF6                                                      | 0.00024638        | 0.000246384          | 4.88723            | 4.88723                      | T up vs N                              | 21.986  | 23.5782   | 17.1588    | 1         |
| cg17581805  | Cxorf67                                                               | 0.00144304        | 0.00144304           | 0.19429            | -5.14695                     | T down vs N                            | 14.752  | 25.1422   | 27.2697    | 1         |
| cg17582336  | SEBOX;VTN                                                             | 0.00300668        | 0.00300668           | 0.16461            | -6.07497                     | T down vs N                            | 12.202  | 30.4874   | 39.9764    | 1         |
| cg17583158  | MYOM2                                                                 | 4.38E-05          | 4.38E-05             | 0.185837           | -5.38105                     | T down vs N                            | 30.825  | 26.5259   | 13.7687    | 1         |
| cg17583946  | LOC100132215                                                          | 0.00012995        | 0.000129953          | 7.76627            | 7.76627                      | T up vs N                              | 25.035  | 39.3532   | 25.1511    | 1         |
| cg17583957  | MAP2K6                                                                | 0.00099974        | 0.000999739          | 0.318124           | -3.14343                     | T down vs N                            | 16.121  | 12.286    | 12.1936    | 1         |
| cg17587492  | UOX                                                                   | 0.00013622        | 0.000136219          | 0.189077           | -5.28886                     | T down vs N                            | 24.802  | 25.9839   | 16.7626    | 1         |
| cg17588266  | CYP11A1;CYP11A1;CYP11A1                                               | 0.00134577        | 0.00134577           | 4.94286            | 4.94286                      | T up vs N                              | 15.007  | 23.9158   | 25.498     | 1         |
| cg17594131  | C1QL1                                                                 | 0.00025567        | 0.000255667          | 0.280043           | -3.57088                     | T down vs N                            | 21.817  | 15.1736   | 11.1279    | 1         |
| cg17598358  | BTBD9;BTBD9;BTBD9                                                     | 0.00016322        | 0.000163221          | 0.256503           | -3.89859                     | T down vs N                            | 23.92   | 17.3393   | 11.5983    | 1         |
| cg17598552  | PSORS1C1                                                              | 1.16E-07          | 1.16E-07             | 0.246919           | -4.04991                     | T down vs N                            | 81.104  | 18.3234   | 3.6148     | 1         |
| cg17602126  | HEYL                                                                  | 0.00023412        | 0.000234121          | 4.07956            | 4.07956                      | T up vs N                              | 22.22   | 18.5151   | 13.3321    | 1         |
| cg17603909  | ORS2K1                                                                | 4.73E-06          | 4.73E-06             | 0.243287           | -4.11037                     | T down vs N                            | 45.452  | 18.7138   | 6.58755    | 1         |
| cg17606183  | HLA-DRA                                                               | 0.00116424        | 0.00116424           | 0.209933           | -4.76343                     | T down vs N                            | 15.545  | 22.8218   | 23.49      | 1         |
| cg17608381  | HLA-A                                                                 | 5.45E-05          | 5.45E-05             | 0.240119           | -4.16461                     | T down vs N                            | 29.594  | 19.0625   | 10.306     | 1         |
| cg17609804  | TBRG4;TBRG4;TBRG4                                                     | 0.00203082        | 0.00203082           | 0.221268           | -4.51942                     | T down vs N                            | 13.534  | 21.3101   | 25.1922    | 1         |
| cg17611046  | FARS2                                                                 | 5.42E-06          | 5.42E-06             | 0.21704            | -4.60744                     | T down vs N                            | 44.433  | 21.8586   | 7.87116    | 1         |
| cg17612991  | C3                                                                    | 5.33E-05          | 5.33E-05             | 0.188594           | -5.30238                     | T down vs N                            | 29.721  | 26.0636   | 14.0312    | 1         |

| Probeset ID                     | UCSC_REFGENE_NAME            | p-value<br>(Type) | p-value (T vs.<br>N) | Ratio (T<br>vs. N) | Fold-<br>Change (T<br>vs. N) | Fold-Change (T vs.<br>N) (Description) | F(Type) | SS (Type) | SS (Error) | F (Error) |
|---------------------------------|------------------------------|-------------------|----------------------|--------------------|------------------------------|----------------------------------------|---------|-----------|------------|-----------|
| cg17616537                      | HOXB3                        | 0.00135162        | 0.00135162           | 4.85406            | 4.85406                      | T up vs N                              | 14.991  | 23.3762   | 24.9493    | 1         |
| cg17616554                      | CFTR                         | 5.64E-05          | 5.64E-05             | 12.1115            | 12.1115                      | T up vs N                              | 29.406  | 58.265    | 31.702     | 1         |
| cg17619965                      | SCUBE3                       | 1.97E-05          | 1.97E-05             | 0.274775           | -3.63934                     | T down vs N                            | 35.609  | 15.6298   | 7.02291    | 1         |
| cg17626301                      | TAP1                         | 0.00224601        | 0.00224601           | 0.308868           | -3.23763                     | T down vs N                            | 13.186  | 12.9277   | 15.6867    | 1         |
| cg17626405                      | MAL;MAL;MAL;MAL              | 0.00246857        | 0.00246857           | 6.7007             | 6.7007                       | T up vs N                              | 12.863  | 33.8906   | 42.1556    | 1         |
| cg17626801                      | ORST3                        | 0.00134541        | 0.00134541           | 0.286466           | -3.49082                     | T down vs N                            | 15.008  | 14.6378   | 15.6052    | 1         |
| cg17627829                      | HCG18;HCG18                  | 0.00130224        | 0.00130224           | 0.157717           | -6.34047                     | T down vs N                            | 15.128  | 31.9501   | 33.7912    | 1         |
| cg17627921                      | SORCS2                       | 0.00067232        | 0.000672324          | 0.312405           | -3.20097                     | T down vs N                            | 17.677  | 12.6783   | 11.4757    | 1         |
| cg17630392                      | NPR3                         | 0.00261994        | 0.00261994           | 3.4868             | 3.4868                       | T up vs N                              | 12.662  | 14.6109   | 18.463     | 1         |
| cg17632243                      | FBXL17                       | 1.52E-05          | 1.52E-05             | 0.219209           | -4.56186                     | T down vs N                            | 37.287  | 21.575    | 9.25783    | 1         |
| cg17632299                      | LECT1;LECT1                  | 0.00054103        | 0.000541028          | 21.1742            | 21.1742                      | T up vs N                              | 18.563  | 87.2879   | 75.2364    | 1         |
| cg17639394                      | HCG9                         | 3.79E-06          | 3.79E-06             | 38.6489            | 38.6489                      | T up vs N                              | 47.143  | 125.09    | 42.4545    | 1         |
| cg17640807                      | RLG2;RLG2                    | 1.60E-05          | 1.60E-05             | 0.174325           | -5.73641                     | T down vs N                            | 36.94   | 28.5801   | 12.379     | 1         |
| BLCAP;BLCAP;BLCAP;BLCAP;NNAT;NN |                              |                   |                      |                    |                              |                                        |         |           |            |           |
| cg17643025                      | AT;BLCAP                     | 6.57E-05          | 6.57E-05             | 3.00989            | 3.00989                      | T up vs N                              | 28.574  | 11.3723   | 6.36789    | 1         |
| cg17646499                      | ITGB5                        | 2.00E-05          | 2.00E-05             | 0.193838           | -5.15895                     | T down vs N                            | 35.53   | 25.2137   | 11.3543    | 1         |
| PRAME;PRAME;PRAME;PRAME;PRAM    |                              |                   |                      |                    |                              |                                        |         |           |            |           |
| cg17648213                      | E                            | 1.22E-09          | 1.22E-09             | 0.206777           | -4.83614                     | T down vs N                            | 154.67  | 23.2669   | 2.40686    | 1         |
| cg17649293                      | VAX2                         | 0.00015681        | 0.000156807          | 0.181624           | -5.50588                     | T down vs N                            | 24.114  | 27.2538   | 18.0835    | 1         |
| cg17651942                      | IL1RAPL2;TEX13A              | 8.49E-06          | 8.49E-06             | 0.331643           | -3.01529                     | T down vs N                            | 41.208  | 11.4094   | 4.42998    | 1         |
| cg17653886                      | SLFN13                       | 0.00459471        | 0.00459471           | 3.03999            | 3.03999                      | T up vs N                              | 10.838  | 11.5786   | 17.093     | 1         |
| cg17654660                      | RGS14;RGS14                  | 1.62E-05          | 1.62E-05             | 0.178785           | -5.59332                     | T down vs N                            | 36.86   | 27.7595   | 12.0498    | 1         |
| cg17654970                      | FAP                          | 0.00066351        | 0.000663507          | 0.332992           | -3.00308                     | T down vs N                            | 17.73   | 11.3256   | 10.2206    | 1         |
| cg17655614                      | CDH1                         | 2.34E-06          | 2.34E-06             | 5.12422            | 5.12422                      | T up vs N                              | 50.998  | 25.0066   | 7.8456     | 1         |
| cg17661462                      | C19orf59                     | 0.00085274        | 0.000852739          | 0.298313           | -3.35218                     | T down vs N                            | 16.735  | 13.7042   | 13.1021    | 1         |
| cg17661928                      | V5X2                         | 2.79E-05          | 2.79E-05             | 0.319006           | -3.13474                     | T down vs N                            | 33.468  | 12.2267   | 5.84522    | 1         |
| cg17662252                      | GNL3L                        | 0.00348954        | 0.00348954           | 0.232604           | -4.29915                     | T down vs N                            | 11.714  | 19.9216   | 27.2099    | 1         |
| cg17664233                      | HLA-DPB2                     | 0.00193876        | 0.00193876           | 0.285494           | -3.5027                      | T down vs N                            | 13.697  | 14.7175   | 17.1927    | 1         |
| cg17664577                      | MMP9                         | 9.17E-06          | 9.17E-06             | 0.18612            | -5.37289                     | T down vs N                            | 40.668  | 26.478    | 10.4172    | 1         |
| cg17666539                      | EVI5L;EVI5L                  | 3.11E-05          | 3.11E-05             | 8.08864            | 8.08864                      | T up vs N                              | 32.809  | 40.9303   | 19.9607    | 1         |
| cg17670263                      | MIR520C                      | 8.26E-05          | 8.26E-05             | 0.259899           | -3.84765                     | T down vs N                            | 27.349  | 17.0057   | 9.9489     | 1         |
| cg17670890                      | PCDH24                       | 1.25E-05          | 1.25E-05             | 0.265552           | -3.76574                     | T down vs N                            | 38.581  | 16.4669   | 6.82904    | 1         |
| cg17672614                      | C6orf176;C6orf176            | 0.00010059        | 0.000100585          | 0.232352           | -4.30382                     | T down vs N                            | 26.327  | 19.9513   | 12.1253    | 1         |
| cg17675311                      | TSC22D1                      | 1.02E-06          | 1.02E-06             | 0.288084           | -3.47121                     | T down vs N                            | 58.252  | 14.5062   | 3.98441    | 1         |
| cg17676132                      | FLRT1;MACROD1                | 0.00026474        | 0.000264744          | 0.25412            | -3.93515                     | T down vs N                            | 21.659  | 17.578    | 12.9855    | 1         |
| cg17676246                      | ARHGEF6                      | 0.0021806         | 0.0021806            | 0.318312           | -3.14157                     | T down vs N                            | 13.288  | 12.2733   | 14.7786    | 1         |
| cg17682535                      | OR8U8;OR5M3                  | 2.72E-05          | 2.72E-05             | 0.191656           | -5.21768                     | T down vs N                            | 33.617  | 25.5629   | 12.1666    | 1         |
| cg17683336                      | KANK2;KANK2                  | 0.00025904        | 0.000259037          | 0.289456           | -3.45475                     | T down vs N                            | 21.758  | 14.3956   | 10.5862    | 1         |
| cg17684657                      | SYCP2L                       | 0.00664727        | 0.00664727           | 3.30971            | 3.30971                      | T up vs N                              | 9.712   | 13.4168   | 22.1034    | 1         |
| cg17688689                      | KANK3                        | 1.06E-05          | 1.06E-05             | 0.169613           | -5.89578                     | T down vs N                            | 39.688  | 29.4839   | 11.8861    | 1         |
| cg17695512                      | OR10AG1                      | 0.00018915        | 0.000189147          | 0.209007           | -4.78454                     | T down vs N                            | 23.216  | 22.9512   | 15.8176    | 1         |
| cg17695682                      | TREH                         | 0.00023236        | 0.000232358          | 0.325756           | -3.06978                     | T down vs N                            | 22.255  | 11.7826   | 8.47099    | 1         |
| cg17696434                      | CLIP3                        | 0.0001294         | 0.000129398          | 0.223045           | -4.4834                      | T down vs N                            | 25.056  | 21.0846   | 13.464     | 1         |
| cg17698295                      | OPLAH                        | 0.00363087        | 0.00363087           | 3.23485            | 3.23485                      | T up vs N                              | 11.586  | 12.9087   | 17.8268    | 1         |
| cg17701035                      | CLEC17A                      | 0.00013995        | 0.00013995           | 0.226538           | -4.41427                     | T down vs N                            | 24.669  | 20.6501   | 13.3936    | 1         |
| cg17702590                      | TGIF2LX                      | 8.12E-05          | 8.12E-05             | 0.209991           | -4.7621                      | T down vs N                            | 27.44   | 22.8136   | 13.3024    | 1         |
| cg17705066                      | GIPC3                        | 0.00103181        | 0.00103181           | 0.093303           | -10.7178                     | T down vs N                            | 16.001  | 52.6934   | 52.6908    | 1         |
| cg17707550                      | RGS17                        | 0.00020898        | 0.000208978          | 0.328673           | -3.04254                     | T down vs N                            | 22.747  | 11.5961   | 8.15651    | 1         |
| cg17708240                      | DPRX                         | 1.13E-06          | 1.13E-06             | 0.255546           | -3.91319                     | T down vs N                            | 57.321  | 17.4347   | 4.86654    | 1         |
| cg17711527                      | LAX1;LAX1;LAX1;LAX1          | 0.0005425         | 0.000542497          | 0.311585           | -3.2094                      | T down vs N                            | 18.552  | 12.7356   | 10.9839    | 1         |
| cg17716663                      | FOSB;FOSB                    | 0.0005986         | 0.0005986            | 0.303789           | -3.29176                     | T down vs N                            | 18.147  | 13.2952   | 11.7219    | 1         |
| cg17718703                      | LRRC8D;LRRC8D                | 6.14E-05          | 6.14E-05             | 0.322822           | -3.09768                     | T down vs N                            | 28.94   | 11.9735   | 6.61969    | 1         |
| cg17720286                      | ADAMTSL5                     | 4.50E-05          | 4.50E-05             | 0.264121           | -3.78614                     | T down vs N                            | 30.673  | 16.6014   | 8.6598     | 1         |
| cg17724366                      | FPR1                         | 7.61E-05          | 7.61E-05             | 0.228795           | -4.37073                     | T down vs N                            | 27.78   | 20.3753   | 11.7354    | 1         |
| cg17725129                      | FGF23                        | 1.24E-06          | 1.24E-06             | 0.315461           | -3.16997                     | T down vs N                            | 56.456  | 12.467    | 3.53327    | 1         |
| cg17725477                      | SNAPC5                       | 0.00500864        | 0.00500864           | 4.42396            | 4.42396                      | T up vs N                              | 10.57   | 20.7112   | 31.3505    | 1         |
| cg17726575                      | E2F6;E2F6;E2F6;E2F6;E2F6     | 0.00041629        | 0.000416294          | 0.178118           | -5.61425                     | T down vs N                            | 19.665  | 27.8801   | 22.6837    | 1         |
| cg17729868                      | LOC84856                     | 4.99E-05          | 4.99E-05             | 0.223115           | -4.482                       | T down vs N                            | 30.083  | 21.0758   | 11.2095    | 1         |
| cg17733616                      | SLC16A5                      | 0.0002232         | 0.000223202          | 7.87981            | 7.87981                      | T up vs N                              | 22.441  | 39.9125   | 28.4571    | 1         |
| cg17734137                      | C20orf197                    | 0.00014667        | 0.000146665          | 0.255086           | -3.92024                     | T down vs N                            | 24.439  | 17.4808   | 11.4445    | 1         |
| cg17736443                      | HIST1H2AJ;HIST1H2BM          | 0.00273446        | 0.00273446           | 31.2333            | 31.2333                      | T up vs N                              | 12.518  | 110.931   | 141.787    | 1         |
| cg17737409                      | GALNT2                       | 5.89E-06          | 5.89E-06             | 0.123183           | -8.118                       | T down vs N                            | 43.824  | 41.0724   | 14.9955    | 1         |
| cg17738213                      | BCL11A;BCL11A;BCL11A         | 0.00117912        | 0.00117912           | 0.287715           | -3.47567                     | T down vs N                            | 15.497  | 14.5361   | 15.0076    | 1         |
| cg17739279                      | FAM50B                       | 0.00057112        | 0.000571123          | 4.23057            | 4.23057                      | T up vs N                              | 18.34   | 19.4848   | 16.9989    | 1         |
| cg17740401                      | COPZ2                        | 0.0002234         | 0.000223403          | 0.301287           | -3.3191                      | T down vs N                            | 22.437  | 13.4804   | 9.61312    | 1         |
| cg17740752                      | MMEL1                        | 5.97E-05          | 5.97E-05             | 0.251029           | -3.9836                      | T down vs N                            | 29.09   | 17.8935   | 9.84164    | 1         |
| cg17741809                      | LIPA;LIPA                    | 0.00334237        | 0.00334237           | 3.67184            | 3.67184                      | T up vs N                              | 11.855  | 15.8457   | 21.3869    | 1         |
| PCDHA6;PCDHA2;PCDHA1;PCDHA10;P  |                              |                   |                      |                    |                              |                                        |         |           |            |           |
| CDHA9;PCDHA7;PCDHA1;PCDHA6;PCD  |                              |                   |                      |                    |                              |                                        |         |           |            |           |
| cg17741839                      | HAS5;PCDHA3;PCDHA4;PCDHA10;P | 7.74E-05          | 7.74E-05             | 5.5643             | 5.5643                       | T up vs N                              | 27.69   | 27.5921   | 15.9436    | 1         |
| cg17748092                      | MYO1F                        | 5.19E-05          | 5.19E-05             | 0.29059            | -3.44128                     | T down vs N                            | 29.869  | 14.305    | 7.66272    | 1         |

| Probeset ID                                                                                     | UCSC_REFGENE_NAME        | p-value<br>(Type) | p-value (T vs.<br>N) | Ratio (T<br>vs. N) | Fold-<br>Change (T<br>vs. N) | Fold-Change (T vs.<br>N) (Description) | F(Type) | SS (Type) | SS (Error) | F (Error) |
|-------------------------------------------------------------------------------------------------|--------------------------|-------------------|----------------------|--------------------|------------------------------|----------------------------------------|---------|-----------|------------|-----------|
| cg17756483                                                                                      | RNF160                   | 4.34E-05          | 4.34E-05             | 0.291129           | -3.43491                     | T down vs N                            | 30.879  | 14.2621   | 7.39005    | 1         |
| cg17757980                                                                                      | SYT15;SYT15              | 0.00111868        | 0.00111868           | 5.76364            | 5.76364                      | T up vs N                              | 15.695  | 28.7353   | 29.2941    | 1         |
| cg17759318                                                                                      | EIF3H                    | 0.00012378        | 0.000123775          | 0.137766           | -7.25871                     | T down vs N                            | 25.277  | 36.8008   | 23.2942    | 1         |
| cg17761772                                                                                      | SIGLEC9                  | 6.55E-05          | 6.55E-05             | 0.265296           | -3.76938                     | T down vs N                            | 28.588  | 16.4909   | 9.22953    | 1         |
| cg17763354                                                                                      | RGR;RGR;RGR              | 0.00158497        | 0.00158497           | 6.38743            | 6.38743                      | T up vs N                              | 14.412  | 32.206    | 35.7544    | 1         |
| cg17764446                                                                                      | ZNF45                    | 0.00056804        | 0.000568042          | 0.294849           | -3.39157                     | T down vs N                            | 18.362  | 13.9701   | 12.1731    | 1         |
| cg17766560                                                                                      | MYO1F                    | 9.37E-05          | 9.37E-05             | 0.282085           | -3.54503                     | T down vs N                            | 26.692  | 15.0009   | 8.99207    | 1         |
| cg17768768                                                                                      | CARD11                   | 0.00075046        | 0.000750459          | 0.170763           | -5.85605                     | T down vs N                            | 17.238  | 29.2596   | 27.1588    | 1         |
| cg17768957                                                                                      | SYTL3;SYTL3              | 4.37E-07          | 4.37E-07             | 0.283257           | -3.53036                     | T down vs N                            | 66.388  | 14.9028   | 3.5917     | 1         |
| cg17769793                                                                                      | FAM13A                   | 0.00057654        | 0.00057654           | 0.273358           | -3.6582                      | T down vs N                            | 18.301  | 15.7552   | 13.7742    | 1         |
| cg17771031                                                                                      | CDH22                    | 0.00055725        | 0.000557252          | 0.245577           | -4.07205                     | T down vs N                            | 18.441  | 18.4666   | 16.0222    | 1         |
| cg17771050                                                                                      | PPYR1                    | 0.00113398        | 0.00113398           | 4.83624            | 4.83624                      | T up vs N                              | 15.644  | 23.2675   | 23.7975    | 1         |
| cg17775003                                                                                      | MYH7B                    | 1.96E-05          | 1.96E-05             | 0.247528           | -4.03995                     | T down vs N                            | 35.652  | 18.259    | 8.19436    | 1         |
| PCDHA2;PCDHA1;PCDHA1;PCDHA4;PC                                                                  |                          |                   |                      |                    |                              |                                        |         |           |            |           |
| cg17777676                                                                                      | DHA3;PCDHA4              | 1.73E-05          | 1.73E-05             | 3.35248            | 3.35248                      | T up vs N                              | 36.449  | 13.7062   | 6.01665    | 1         |
| cg17781721                                                                                      | COL23A1                  | 4.73E-05          | 4.73E-05             | 0.321464           | -3.11077                     | T down vs N                            | 30.389  | 12.063    | 6.35119    | 1         |
| cg17781866                                                                                      | ACOX3;ACOX3              | 1.09E-05          | 1.09E-05             | 0.221612           | -4.51239                     | T down vs N                            | 39.475  | 21.2661   | 8.61967    | 1         |
| cg17782713                                                                                      | BM11                     | 5.03E-05          | 5.03E-05             | 0.262038           | -3.81623                     | T down vs N                            | 30.044  | 16.7994   | 8.94665    | 1         |
| cg17782974                                                                                      | TRIM8                    | 4.12E-06          | 4.12E-06             | 6.24671            | 6.24671                      | T up vs N                              | 46.5    | 31.4368   | 10.8169    | 1         |
| SEC31A;SEC31A;SEC31A;SEC31A;SEC3                                                                |                          |                   |                      |                    |                              |                                        |         |           |            |           |
| cg17783697                                                                                      | 1A                       | 7.40E-05          | 7.40E-05             | 0.30399            | -3.28959                     | T down vs N                            | 27.935  | 13.2804   | 7.60643    | 1         |
| cg17785018                                                                                      | FAM129C;FAM129C          | 8.79E-06          | 8.79E-06             | 0.327317           | -3.05515                     | T down vs N                            | 40.963  | 11.6824   | 4.56314    | 1         |
| cg17785773                                                                                      | BHMT                     | 5.57E-05          | 5.57E-05             | 4.84823            | 4.84823                      | T up vs N                              | 29.469  | 23.3407   | 12.6725    | 1         |
| cg17785786                                                                                      | CPE                      | 0.00015561        | 0.000155607          | 4.24937            | 4.24937                      | T up vs N                              | 24.151  | 19.6047   | 12.9882    | 1         |
| cg17785802                                                                                      | PADI4                    | 0.00067065        | 0.000670647          | 0.303511           | -3.29477                     | T down vs N                            | 17.687  | 13.3156   | 12.0457    | 1         |
| cg17787502                                                                                      | MYLK;MYLK;MYLK;MYLK      | 1.24E-07          | 1.24E-07             | 0.215217           | -4.64648                     | T down vs N                            | 80.251  | 22.1007   | 4.4063     | 1         |
| cg17788013                                                                                      | SPINK5;SPINK5;SPINK5     | 0.00011525        | 0.00011525           | 0.318662           | -3.13812                     | T down vs N                            | 25.635  | 12.2498   | 7.64558    | 1         |
| cg17792192                                                                                      | CAMSAP1                  | 0.00398878        | 0.00398878           | 4.74503            | 4.74503                      | T up vs N                              | 11.285  | 22.7088   | 32.1981    | 1         |
| cg17794358                                                                                      | ATF6B;ATF6B;FKBPL        | 3.36E-05          | 3.36E-05             | 0.196911           | -5.07844                     | T down vs N                            | 32.351  | 24.7326   | 12.2321    | 1         |
| cg17796593                                                                                      | FBXL21                   | 5.11E-06          | 5.11E-06             | 0.253276           | -3.94826                     | T down vs N                            | 44.883  | 17.6635   | 6.29673    | 1         |
| cg17797940                                                                                      | FNDC3B;FNDC3B            | 9.74E-06          | 9.74E-06             | 0.298333           | -3.35196                     | T down vs N                            | 40.252  | 13.7027   | 5.44681    | 1         |
| cg17798659                                                                                      | OVGP1                    | 0.00021578        | 0.000215783          | 0.277557           | -3.60286                     | T down vs N                            | 22.598  | 15.387    | 10.8945    | 1         |
| MIR19A;MIR17HG;MIR17HG;MIR17;M                                                                  |                          |                   |                      |                    |                              |                                        |         |           |            |           |
| cg17799287                                                                                      | IR18A                    | 0.00014072        | 0.000140723          | 0.312732           | -3.19763                     | T down vs N                            | 24.642  | 12.6555   | 8.2173     | 1         |
| cg17799599                                                                                      | PRKCA                    | 0.00461402        | 0.00461402           | 0.229566           | -4.35605                     | T down vs N                            | 10.825  | 20.2825   | 29.9784    | 1         |
| cg17800708                                                                                      | HOXA3;HOXA3;HOXA3        | 0.00326838        | 0.00326838           | 5.06652            | 5.06652                      | T up vs N                              | 11.928  | 24.6612   | 33.0812    | 1         |
| cg17801840                                                                                      | TNFRSF8                  | 0.00016423        | 0.000164228          | 0.172841           | -5.78566                     | T down vs N                            | 23.89   | 28.8606   | 19.3288    | 1         |
| cg17802213                                                                                      | DGKG;DGKG;DGKG           | 3.43E-05          | 3.43E-05             | 4.74193            | 4.74193                      | T up vs N                              | 32.228  | 22.6897   | 11.2645    | 1         |
| cg17803430                                                                                      | C4BPA                    | 0.00085779        | 0.000857787          | 0.278048           | -3.5965                      | T down vs N                            | 16.712  | 15.3446   | 14.6907    | 1         |
| cg17803993                                                                                      | FOXP1;FOXP1              | 1.19E-05          | 1.19E-05             | 0.163431           | -6.11879                     | T down vs N                            | 38.871  | 30.7308   | 12.6493    | 1         |
| cg17804112                                                                                      | NCR1;NCR1;NCR1;NCR1;NCR1 | 2.13E-05          | 2.13E-05             | 0.183833           | -5.43971                     | T down vs N                            | 35.135  | 26.8688   | 12.2358    | 1         |
| cg17804348                                                                                      | TP73;TP73;TP73;TP73      | 5.55E-05          | 5.55E-05             | 3.46646            | 3.46646                      | T up vs N                              | 29.496  | 14.4743   | 7.85147    | 1         |
| cg17806623                                                                                      | KL                       | 0.00259984        | 0.00259984           | 4.01574            | 4.01574                      | T up vs N                              | 12.688  | 18.1021   | 22.8279    | 1         |
| cg17807479                                                                                      | SHISA6                   | 0.0019061         | 0.0019061            | 6.27799            | 6.27799                      | T up vs N                              | 13.756  | 31.6085   | 36.7644    | 1         |
| cg17813670                                                                                      | RBM34;RBM34              | 0.00016117        | 0.000161173          | 0.26472            | -3.77758                     | T down vs N                            | 23.981  | 16.545    | 11.0388    | 1         |
| cg17814047                                                                                      | PDGFA;PDGFA              | 0.00411825        | 0.00411825           | 3.28933            | 3.28933                      | T up vs N                              | 11.183  | 13.2786   | 18.9984    | 1         |
| cg17815049                                                                                      | CNST;TFB2M;CNST          | 8.06E-06          | 8.06E-06             | 0.106154           | -9.42029                     | T down vs N                            | 41.57   | 47.116    | 18.1345    | 1         |
| cg17817532                                                                                      | TET1                     | 4.29E-06          | 4.29E-06             | 0.138969           | -7.19586                     | T down vs N                            | 46.199  | 36.4786   | 12.6336    | 1         |
| cg17819119                                                                                      | SEMA4C                   | 2.54E-06          | 2.54E-06             | 3.84573            | 3.84573                      | T up vs N                              | 50.334  | 16.9932   | 5.40178    | 1         |
| cg17820828                                                                                      | KCNQ1;KCNQ1              | 1.40E-06          | 1.40E-06             | 5.69131            | 5.69131                      | T up vs N                              | 55.355  | 28.3225   | 8.1865     | 1         |
| cg17825274                                                                                      | ATXN7L1;ATXN7L1          | 0.00167199        | 0.00167199           | 0.254208           | -3.93378                     | T down vs N                            | 14.22   | 17.5691   | 19.7677    | 1         |
| BTNL8;BTNL8;BTNL8;BTNL8;BTNL8;BT                                                                |                          |                   |                      |                    |                              |                                        |         |           |            |           |
| cg17826428                                                                                      | NL8                      | 5.50E-05          | 5.50E-05             | 0.300586           | -3.32684                     | T down vs N                            | 29.548  | 13.5328   | 7.32801    | 1         |
| PDPN;PDPN;PDPN;PDPN;PDPN;PDPN                                                                   |                          |                   |                      |                    |                              |                                        |         |           |            |           |
| cg17826518                                                                                      | STK40                    | 0.00013949        | 0.000139494          | 0.171018           | -5.84735                     | T down vs N                            | 24.685  | 29.2104   | 18.9334    | 1         |
| cg17828445                                                                                      | 9-Mar                    | 0.00014482        | 0.000144823          | 3.99421            | 3.99421                      | T up vs N                              | 24.501  | 17.9624   | 11.7302    | 1         |
| cg17829533                                                                                      | SH2D7                    | 5.42E-05          | 5.42E-05             | 0.236873           | -4.22168                     | T down vs N                            | 29.628  | 19.4279   | 10.4916    | 1         |
| cg17829746                                                                                      | PROX1                    | 0.0002955         | 0.000295502          | 0.281683           | -3.55009                     | T down vs N                            | 21.164  | 15.0347   | 11.3663    | 1         |
| cg17831269                                                                                      | CHD5                     | 8.74E-05          | 8.74E-05             | 26.5521            | 26.5521                      | T up vs N                              | 27.052  | 100.71    | 59.5648    | 1         |
| cg17831440                                                                                      | MCF2L;MCF2L              | 0.0050022         | 0.0050022            | 0.299809           | -3.33545                     | T down vs N                            | 10.574  | 13.5911   | 20.5651    | 1         |
| cg17832921                                                                                      | TPTE;TPTE;TPTE           | 0.00014184        | 0.000141841          | 0.29998            | -3.33356                     | T down vs N                            | 24.603  | 13.5782   | 8.83036    | 1         |
| cg17835072                                                                                      | ATP6V1B1                 | 0.00017083        | 0.000170833          | 0.182364           | -5.48355                     | T down vs N                            | 23.701  | 27.1241   | 18.311     | 1         |
| cg17835356                                                                                      | GINS4                    | 7.24E-05          | 7.24E-05             | 0.27571            | -3.627                       | T down vs N                            | 28.051  | 15.5477   | 8.86837    | 1         |
| cg17838420                                                                                      | IRX4                     | 0.00654171        | 0.00654171           | 3.03141            | 3.03141                      | T up vs N                              | 9.7597  | 11.5199   | 18.8856    | 1         |
| cg17840849                                                                                      | ABR;ABR                  | 9.93E-05          | 9.93E-05             | 0.298835           | -3.34633                     | T down vs N                            | 26.391  | 13.6646   | 8.28433    | 1         |
| cg17845532                                                                                      | MATK;MATK;MATK           | 0.00504887        | 0.00504887           | 0.311948           | -3.20567                     | T down vs N                            | 10.545  | 12.7102   | 19.2846    | 1         |
| cg17848003                                                                                      | LRRC47                   | 3.69E-05          | 3.69E-05             | 0.170591           | -5.86196                     | T down vs N                            | 31.813  | 29.293    | 14.7324    | 1         |
| PCDHA7;PCDHA13;PCDHA12;PCDHA6;<br>PCDHA10;PCDHA4;PCDHA11;PCDHA8;<br>PCDHA1;PCDHA2;PCDHA6;PCDHA1 |                          |                   |                      |                    |                              |                                        |         |           |            |           |
| cg17852221                                                                                      |                          | 4.97E-05          | 4.97E-05             | 3.87713            | 3.87713                      | T up vs N                              | 30.112  | 17.1989   | 9.13853    | 1         |

| Probeset ID                                                 | UCSC_REFGENE_NAME            | p-value<br>(Type) | p-value (T vs.<br>N) | Ratio (T<br>vs. N) | Fold-<br>Change (T<br>vs. N) | Fold-Change (T vs.<br>N) (Description) | F(Type) | SS (Type) | SS (Error) | F (Error) |
|-------------------------------------------------------------|------------------------------|-------------------|----------------------|--------------------|------------------------------|----------------------------------------|---------|-----------|------------|-----------|
| cg17854440                                                  | ENPEP                        | 4.52E-05          | 4.52E-05             | 0.21329            | -4.68844                     | T down vs N                            | 30.643  | 22.3602   | 11.6753    | 1         |
| cg17854654                                                  | SCAMP3;CLK2;SCAMP3           | 0.00020271        | 0.000202709          | 0.282175           | -3.54391                     | T down vs N                            | 22.89   | 14.9934   | 10.4805    | 1         |
| cg17857791                                                  | MIR520B                      | 0.00016812        | 0.00016812           | 0.181845           | -5.4992                      | T down vs N                            | 23.778  | 27.215    | 18.313     | 1         |
| PCDHGA4;PCDHGA9;PCDHGA1;PCDHGA11;PCDHGB1;PCDHGB6;PCDHGA11;P |                              |                   |                      |                    |                              |                                        |         |           |            |           |
| cg17857974                                                  | CDHGB3;PCDHGB7;PCDHGA6;PCDHG | 0.00066307        | 0.000663068          | 5.02167            | 5.02167                      | T up vs N                              | 17.733  | 24.3917   | 22.0085    | 1         |
| cg17861836                                                  | C17orf56                     | 0.00100753        | 0.00100753           | 0.285008           | -3.50868                     | T down vs N                            | 16.092  | 14.7576   | 14.6736    | 1         |
| cg17861863                                                  | ADARB2                       | 4.68E-05          | 4.68E-05             | 0.104958           | -9.52762                     | T down vs N                            | 30.447  | 47.5932   | 25.0102    | 1         |
| cg17862152                                                  | PPFIA4                       | 4.56E-05          | 4.56E-05             | 4.84339            | 4.84339                      | T up vs N                              | 30.598  | 23.3112   | 12.1895    | 1         |
| cg17862558                                                  | TET2;TET2                    | 0.00030106        | 0.00030106           | 0.295946           | -3.379                       | T down vs N                            | 21.081  | 13.8853   | 10.5388    | 1         |
| cg17863076                                                  | REG1B                        | 2.33E-06          | 2.33E-06             | 0.256442           | -3.89952                     | T down vs N                            | 51.054  | 17.3454   | 5.43598    | 1         |
| cg17863551                                                  | CD177                        | 0.0004188         | 0.000418797          | 0.251975           | -3.96864                     | T down vs N                            | 19.64   | 17.7962   | 14.4981    | 1         |
| cg17867848                                                  | B3GNTL1                      | 0.00069054        | 0.000690544          | 0.291127           | -3.43493                     | T down vs N                            | 17.569  | 14.2623   | 12.9883    | 1         |
| cg17868751                                                  | PRKX                         | 0.00240401        | 0.00240401           | 3.64021            | 3.64021                      | T up vs N                              | 12.953  | 15.6356   | 19.3133    | 1         |
| cg17872326                                                  | SIGLEC12                     | 0.0002759         | 0.000275904          | 0.295335           | -3.38599                     | T down vs N                            | 21.472  | 13.9325   | 10.3819    | 1         |
| cg17874421                                                  | COX6B2                       | 9.86E-06          | 9.86E-06             | 0.123329           | -8.10837                     | T down vs N                            | 40.169  | 41.0258   | 16.3414    | 1         |
| cg17876497                                                  | AGAP11                       | 0.00129291        | 0.00129291           | 5.17165            | 5.17165                      | T up vs N                              | 15.155  | 25.2894   | 26.6997    | 1         |
| cg17877786                                                  | POLR3GL                      | 0.00073317        | 0.000733174          | 0.308407           | -3.24247                     | T down vs N                            | 17.33   | 12.9606   | 11.9658    | 1         |
| cg17878878                                                  | C1orf158                     | 5.69E-05          | 5.69E-05             | 0.249582           | -4.00669                     | T down vs N                            | 29.352  | 18.0434   | 9.83572    | 1         |
| cg17880320                                                  | PEX19;PEX19                  | 7.51E-05          | 7.51E-05             | 0.235105           | -4.25342                     | T down vs N                            | 27.853  | 19.6306   | 11.2765    | 1         |
| cg17881208                                                  | KIAA0748                     | 0.00080633        | 0.000806334          | 0.314045           | -3.18426                     | T down vs N                            | 16.954  | 12.5644   | 11.8573    | 1         |
| cg17883742                                                  | ZNF264                       | 7.39E-05          | 7.39E-05             | 0.289233           | -3.45742                     | T down vs N                            | 27.938  | 14.4135   | 8.25454    | 1         |
| cg17884016                                                  | C7orf28B                     | 4.74E-05          | 4.74E-05             | 0.270105           | -3.70226                     | T down vs N                            | 30.374  | 16.0473   | 8.45313    | 1         |
| cg17885791                                                  | ZC3H12D                      | 5.16E-06          | 5.16E-06             | 4.43053            | 4.43053                      | T up vs N                              | 44.805  | 20.7525   | 7.41075    | 1         |
| cg17889618                                                  | C1orf57                      | 0.00066343        | 0.000663427          | 0.291678           | -3.42844                     | T down vs N                            | 17.73   | 14.2186   | 12.831     | 1         |
| cg17889831                                                  | DSTYK;DSTYK                  | 0.00031853        | 0.000318527          | 0.223802           | -4.46824                     | T down vs N                            | 20.83   | 20.9895   | 16.1223    | 1         |
| cg17894008                                                  | NACA2                        | 0.00041652        | 0.000416517          | 0.265995           | -3.75947                     | T down vs N                            | 19.663  | 16.4256   | 13.3656    | 1         |
| cg17894362                                                  | C1orf175;C1orf175            | 0.00154828        | 0.00154828           | 0.293754           | -3.40421                     | T down vs N                            | 14.497  | 14.0554   | 15.5131    | 1         |
| cg17894779                                                  | FHIT;FHIT                    | 0.00025322        | 0.000253216          | 0.269987           | -3.70388                     | T down vs N                            | 21.861  | 16.0581   | 11.7528    | 1         |
| cg17895446                                                  | GALNTL6                      | 2.71E-05          | 2.71E-05             | 0.269377           | -3.71227                     | T down vs N                            | 33.644  | 16.1137   | 7.66321    | 1         |
| cg17897148                                                  | EEFSEC                       | 0.00020049        | 0.000200491          | 0.265947           | -3.76015                     | T down vs N                            | 22.941  | 16.43     | 11.4588    | 1         |
| cg17897391                                                  | ADAM7                        | 0.00082423        | 0.000824229          | 0.283257           | -3.53036                     | T down vs N                            | 16.868  | 14.9028   | 14.1359    | 1         |
| cg17897533                                                  | AP1M2                        | 0.0005569         | 0.000556904          | 0.306085           | -3.26706                     | T down vs N                            | 18.444  | 13.1276   | 11.3884    | 1         |
| cg17900015                                                  | KRT28                        | 0.00204572        | 0.00204572           | 0.331361           | -3.01785                     | T down vs N                            | 13.509  | 11.4269   | 13.534     | 1         |
| cg17903019                                                  | FBXL18                       | 1.82E-06          | 1.82E-06             | 0.203744           | -4.90813                     | T down vs N                            | 53.128  | 23.7052   | 7.139      | 1         |
| cg17903359                                                  | OR2G2                        | 0.00064616        | 0.000646163          | 0.298216           | -3.35327                     | T down vs N                            | 17.837  | 13.7116   | 12.2996    | 1         |
| cg17904739                                                  | EFCAB4B;EFCAB4B;EFCAB4B      | 0.00619433        | 0.00619433           | 0.273113           | -3.66149                     | T down vs N                            | 9.9229  | 15.777    | 25.4393    | 1         |
| cg17907057                                                  | CXCL13                       | 6.11E-06          | 6.11E-06             | 0.187655           | -5.32892                     | T down vs N                            | 43.557  | 26.2198   | 9.63157    | 1         |
| cg17907457                                                  | HS2ST1;HS2ST1                | 5.66E-06          | 5.66E-06             | 0.274477           | -3.6433                      | T down vs N                            | 44.12   | 15.6561   | 5.67771    | 1         |
| cg17907583                                                  | SNORD9;CHD8;CHD8             | 0.00266973        | 0.00266973           | 0.319107           | -3.13375                     | T down vs N                            | 12.598  | 12.2199   | 15.5193    | 1         |
| cg17908657                                                  | OR1411                       | 0.00049086        | 0.000490864          | 0.237356           | -4.21308                     | T down vs N                            | 18.968  | 19.373    | 16.3417    | 1         |
| cg17914107                                                  | PALLD;PALLD                  | 6.37E-05          | 6.37E-05             | 0.255762           | -3.90989                     | T down vs N                            | 28.742  | 17.4132   | 9.69368    | 1         |
| cg17916916                                                  | ARSG;SALL6A6                 | 0.0001119         | 0.000111895          | 0.31654            | -3.15916                     | T down vs N                            | 25.784  | 12.3933   | 7.69044    | 1         |
| cg17922326                                                  | ADARB2                       | 1.96E-05          | 1.96E-05             | 0.117201           | -8.53235                     | T down vs N                            | 35.634  | 43.0484   | 19.329     | 1         |
| cg17923945                                                  | FABP6;FABP6;FABP6            | 0.00016301        | 0.000163005          | 0.20253            | -4.93755                     | T down vs N                            | 23.926  | 23.8836   | 15.9715    | 1         |
| cg17924072                                                  | HMH A1                       | 0.00014677        | 0.000146767          | 0.217945           | -4.58832                     | T down vs N                            | 24.436  | 21.7397   | 14.2348    | 1         |
| cg17925174                                                  | ADAMTS2;ADAMTS2              | 5.07E-05          | 5.07E-05             | 0.313965           | -3.18507                     | T down vs N                            | 29.993  | 12.957    | 6.70547    | 1         |
| cg17928268                                                  | CST11;CST11                  | 0.00388371        | 0.00388371           | 0.308493           | -3.24156                     | T down vs N                            | 11.37   | 12.9544   | 18.23      | 1         |
| cg17928317                                                  | MAGEC3;MAGEC3                | 5.72E-05          | 5.72E-05             | 0.246273           | -4.06053                     | T down vs N                            | 29.331  | 18.3921   | 10.0329    | 1         |
| cg17930201                                                  | SYT11;GON4L;GON4L            | 4.44E-05          | 4.44E-05             | 0.210492           | -4.75078                     | T down vs N                            | 30.742  | 22.7441   | 11.8373    | 1         |
| cg17933493                                                  | TKTL1;TKTL1;TKTL1            | 0.00014312        | 0.000143123          | 0.297088           | -3.36601                     | T down vs N                            | 24.559  | 13.7976   | 8.98915    | 1         |
| cg17934790                                                  | CLEC17A                      | 7.89E-05          | 7.89E-05             | 0.216703           | -4.61462                     | T down vs N                            | 27.594  | 21.9032   | 12.7003    | 1         |
| ARMCX5;ARMCX5;ARMCX5;ARMCX5;                                |                              |                   |                      |                    |                              |                                        |         |           |            |           |
| cg17935021                                                  | ARMCX5;ARMCX5                | 4.60E-05          | 4.60E-05             | 0.111024           | -9.00707                     | T down vs N                            | 31.948  | 42.5884   | 19.9959    | 1         |
| cg17936051                                                  | C17orf54                     | 6.24E-06          | 6.24E-06             | 0.268673           | -3.722                       | T down vs N                            | 43.403  | 16.178    | 5.96382    | 1         |
| cg17937101                                                  | MIR596                       | 0.00113197        | 0.00113197           | 3.46817            | 3.46817                      | T up vs N                              | 15.65   | 14.4858   | 14.8094    | 1         |
| cg17938303                                                  | ZMYM6                        | 4.71E-05          | 4.71E-05             | 0.214946           | -4.65234                     | T down vs N                            | 30.413  | 22.137    | 11.646     | 1         |
| cg17939889                                                  | HDAC4                        | 0.00720245        | 0.00720245           | 0.243928           | -4.09957                     | T down vs N                            | 9.4748  | 18.6442   | 31.4842    | 1         |
| cg17944572                                                  | FIS1                         | 1.49E-05          | 1.49E-05             | 0.303126           | -3.29895                     | T down vs N                            | 37.4    | 13.3439   | 5.70869    | 1         |
| cg17945153                                                  | CCND3;CCND3                  | 4.01E-05          | 4.01E-05             | 0.282367           | -3.5415                      | T down vs N                            | 31.326  | 14.9773   | 7.64989    | 1         |
| cg17945976                                                  | MEIS1                        | 0.00034742        | 0.000347418          | 0.215555           | -4.6392                      | T down vs N                            | 20.448  | 22.0556   | 17.2579    | 1         |
| cg17950023                                                  | LHB                          | 0.00616283        | 0.00616283           | 0.303975           | -3.28975                     | T down vs N                            | 9.9382  | 13.2815   | 21.3825    | 1         |
| cg17950410                                                  | TUBB;MDC1                    | 5.25E-06          | 5.25E-06             | 0.232668           | -4.29796                     | T down vs N                            | 44.676  | 19.9141   | 7.13187    | 1         |
| cg17951138                                                  | FLJ42709;FLJ42709            | 0.00098853        | 0.000988531          | 5.29827            | 5.29827                      | T up vs N                              | 16.164  | 26.0394   | 25.7747    | 1         |
| cg17952824                                                  | HNRNPA3P1                    | 7.74E-05          | 7.74E-05             | 0.302594           | -3.30476                     | T down vs N                            | 27.693  | 13.3833   | 7.73242    | 1         |
| cg17953141                                                  | ARSI;ARSI                    | 0.00053047        | 0.000530472          | 3.18789            | 3.18789                      | T up vs N                              | 18.645  | 12.5892   | 10.8035    | 1         |
| cg17953385                                                  | C10orf41;C10orf41            | 0.00027816        | 0.000278164          | 8.04698            | 8.04698                      | T up vs N                              | 21.435  | 40.7284   | 30.4011    | 1         |
| cg17953764                                                  | ZAR1                         | 0.00043632        | 0.000436323          | 8.05295            | 8.05295                      | T up vs N                              | 19.465  | 40.7574   | 33.5022    | 1         |
| cg17954695                                                  | NME5;BRD8                    | 8.89E-06          | 8.89E-06             | 0.168885           | -5.9212                      | T down vs N                            | 40.881  | 29.6271   | 11.5955    | 1         |
| cg17955093                                                  | RPS13                        | 3.90E-06          | 3.90E-06             | 0.184733           | -5.41321                     | T down vs N                            | 46.931  | 26.7141   | 9.10753    | 1         |
| cg17955729                                                  | PRRT1                        | 6.31E-06          | 6.31E-06             | 3.28807            | 3.28807                      | T up vs N                              | 43.321  | 13.2702   | 4.90119    | 1         |

| Probeset ID | UCSC_REFGENE_NAME                                                                           | p-value<br>(Type) | p-value (T vs.<br>N) | Ratio (T<br>vs. N) | Fold-<br>Change (T<br>vs. N) | Fold-Change (T vs.<br>N) (Description) | F(Type) | SS (Type) | SS (Error) | F (Error) |
|-------------|---------------------------------------------------------------------------------------------|-------------------|----------------------|--------------------|------------------------------|----------------------------------------|---------|-----------|------------|-----------|
| cg17956747  | TMPRSS6                                                                                     | 1.09E-05          | 1.09E-05             | 0.253043           | -3.9519                      | T down vs N                            | 39.499  | 17.6872   | 7.16454    | 1         |
| cg17958291  | PTPRZ1                                                                                      | 0.00021729        | 0.00021729           | 0.253728           | -3.94123                     | T down vs N                            | 22.565  | 17.6177   | 12.4918    | 1         |
| cg17960615  | RAB31                                                                                       | 2.45E-05          | 2.45E-05             | 0.185782           | -5.38265                     | T down vs N                            | 34.252  | 26.5353   | 12.3954    | 1         |
| cg17961057  | C2orf81                                                                                     | 0.00037779        | 0.000377788          | 0.250708           | -3.98871                     | T down vs N                            | 20.083  | 17.9267   | 14.282     | 1         |
| cg17961273  | BTNL2                                                                                       | 3.36E-05          | 3.36E-05             | 0.249741           | -4.00415                     | T down vs N                            | 32.362  | 18.027    | 8.91266    | 1         |
| cg17963840  | ADRA1A;ADRA1A;ADRA1A;ADRA1A;A<br>DRA1A;ADRA1A;ADRA1A;ADRA1A                                 | 0.0011266         | 0.0011266            | 4.62553            | 4.62553                      | T up vs N                              | 15.668  | 21.9709   | 22.4361    | 1         |
| cg17966071  | PPAN-P2RY11;SNORD105B;PPAN                                                                  | 4.66E-05          | 4.66E-05             | 0.230161           | -4.34479                     | T down vs N                            | 30.465  | 20.2112   | 10.6147    | 1         |
| cg17968795  | C2orf55                                                                                     | 0.00010357        | 0.000103572          | 15.4983            | 15.4983                      | T up vs N                              | 26.177  | 70.3548   | 43.0022    | 1         |
| cg17971290  | SMYD3;SMYD3<br>APOBEC3H;APOBEC3H;APOBEC3H;AP                                                | 0.00072298        | 0.000722982          | 0.32489            | -3.07797                     | T down vs N                            | 17.386  | 11.8386   | 10.8949    | 1         |
| cg17972162  | OBEC3H                                                                                      | 1.20E-05          | 1.20E-05             | 0.24372            | -4.10308                     | T down vs N                            | 38.853  | 18.6668   | 7.68708    | 1         |
| cg17974185  | CTNNBL1<br>DYSF;DYSF;DYSF;DYSF;DYSF;DYSF;DYSF;<br>F;DYSF;DYSF;DYSF;DYSF;DYSF;DYSF;DY        | 1.60E-05          | 1.60E-05             | 0.307877           | -3.24805                     | T down vs N                            | 36.935  | 12.9985   | 5.63084    | 1         |
| cg17974684  | SF                                                                                          | 0.00671926        | 0.00671926           | 0.327033           | -3.0578                      | T down vs N                            | 9.68    | 11.7006   | 19.3397    | 1         |
| cg17976157  | GUSBL2                                                                                      | 0.00031554        | 0.000315536          | 0.27799            | -3.59725                     | T down vs N                            | 20.872  | 15.3496   | 11.7666    | 1         |
| cg17976390  | RBM17;RBM17                                                                                 | 0.00012194        | 0.000121944          | 0.212667           | -4.70218                     | T down vs N                            | 25.352  | 22.445    | 14.1655    | 1         |
| cg17977197  | IFNAR2;IFNAR2;IFNAR2                                                                        | 0.0003963         | 0.000396303          | 3.44691            | 3.44691                      | T up vs N                              | 19.877  | 14.3429   | 11.5456    | 1         |
| cg17979595  | PCDH24                                                                                      | 1.29E-05          | 1.29E-05             | 0.182445           | -5.4811                      | T down vs N                            | 38.339  | 27.1098   | 11.3137    | 1         |
| cg17981339  | MUCL1                                                                                       | 0.00030179        | 0.000301789          | 0.188074           | -5.31705                     | T down vs N                            | 21.07   | 26.15     | 19.8576    | 1         |
| cg17981470  | RP1L1                                                                                       | 7.88E-06          | 7.88E-06             | 0.2059             | -4.85672                     | T down vs N                            | 41.733  | 23.3924   | 8.96851    | 1         |
| cg17983430  | CCNJ;CCNJ;CCNJ                                                                              | 3.11E-05          | 3.11E-05             | 0.314731           | -3.17732                     | T down vs N                            | 32.807  | 12.5172   | 6.10468    | 1         |
| cg17983776  | ACCN1                                                                                       | 0.00276441        | 0.00276441           | 0.235268           | -4.25048                     | T down vs N                            | 12.482  | 19.6118   | 25.1401    | 1         |
| cg17984638  | TXK                                                                                         | 1.31E-06          | 1.31E-06             | 0.194139           | -5.15095                     | T down vs N                            | 55.955  | 25.1661   | 7.19613    | 1         |
| cg17984885  | NVL;NVL                                                                                     | 2.47E-06          | 2.47E-06             | 0.302698           | -3.30362                     | T down vs N                            | 50.563  | 13.3756   | 4.23254    | 1         |
| cg17985300  | KRT28                                                                                       | 6.08E-05          | 6.08E-05             | 0.243677           | -4.10379                     | T down vs N                            | 28.989  | 18.6714   | 10.3053    | 1         |
| cg17985944  | FLJ36000                                                                                    | 2.62E-05          | 2.62E-05             | 0.120139           | -8.32371                     | T down vs N                            | 33.853  | 42.0598   | 19.8787    | 1         |
| cg17986992  | VSIG8;C1orf204                                                                              | 2.30E-06          | 2.30E-06             | 6.86229            | 6.86229                      | T up vs N                              | 51.146  | 34.745    | 10.8692    | 1         |
| cg17988320  | ZNRF2                                                                                       | 0.00172148        | 0.00172148           | 0.318025           | -3.14441                     | T down vs N                            | 14.116  | 12.2927   | 13.933     | 1         |
| cg17989833  | WT1;WT1;WT1                                                                                 | 3.90E-06          | 3.90E-06             | 0.170381           | -5.86921                     | T down vs N                            | 46.937  | 29.334    | 9.99938    | 1         |
| cg17992177  | MMP26                                                                                       | 0.00115687        | 0.00115687           | 0.314589           | -3.17875                     | T down vs N                            | 15.569  | 12.5269   | 12.874     | 1         |
| cg17993504  | RPL32P3;SNORA7B                                                                             | 0.00012161        | 0.000121608          | 0.33274            | -3.00535                     | T down vs N                            | 25.366  | 11.3412   | 7.15376    | 1         |
| cg18000445  | ELOVL2                                                                                      | 6.81E-06          | 6.81E-06             | 0.112415           | -8.89565                     | T down vs N                            | 42.773  | 44.7392   | 16.7355    | 1         |
| cg18002480  | ERICH1                                                                                      | 0.0001484         | 0.000148404          | 0.314911           | -3.1755                      | T down vs N                            | 24.382  | 12.5048   | 8.20609    | 1         |
| cg18003795  | CECR1                                                                                       | 2.27E-05          | 2.27E-05             | 0.332423           | -3.00822                     | T down vs N                            | 34.733  | 11.3608   | 5.23352    | 1         |
| cg18004756  | GRHL2                                                                                       | 0.00021443        | 0.000214432          | 12.0491            | 12.0491                      | T up vs N                              | 22.627  | 58.0242   | 41.0301    | 1         |
| cg18005337  | ZAP70                                                                                       | 0.00081233        | 0.000812326          | 5.70417            | 5.70417                      | T up vs N                              | 16.925  | 28.396    | 26.8439    | 1         |
| cg18007543  | ARSD                                                                                        | 0.00396649        | 0.00396649           | 0.321741           | -3.10809                     | T down vs N                            | 11.302  | 12.0447   | 17.0508    | 1         |
| cg18007837  | ALOX12P2                                                                                    | 3.15E-06          | 3.15E-06             | 13.5072            | 13.5072                      | T up vs N                              | 48.611  | 63.4724   | 20.8917    | 1         |
| cg18008221  | TMEM194B                                                                                    | 0.00022467        | 0.000224666          | 0.28122            | -3.55594                     | T down vs N                            | 22.411  | 15.0738   | 10.762     | 1         |
| cg18008675  | RAPGEF4;RAPGEF4                                                                             | 8.57E-07          | 8.57E-07             | 0.230611           | -4.33632                     | T down vs N                            | 59.817  | 20.1575   | 5.39182    | 1         |
| cg18009093  | COL23A1                                                                                     | 0.00538862        | 0.00538862           | 0.252412           | -3.96177                     | T down vs N                            | 10.345  | 17.7515   | 27.4545    | 1         |
| cg18009321  | LOC284798;LOC284798;LOC284798                                                               | 0.00013001        | 0.000130013          | 10.3735            | 10.3735                      | T up vs N                              | 25.033  | 51.2525   | 32.759     | 1         |
| cg18009322  | KIF25;KIF25                                                                                 | 1.36E-05          | 1.36E-05             | 0.232068           | -4.30908                     | T down vs N                            | 38.019  | 19.9847   | 8.41038    | 1         |
| cg18009704  | OR1A1                                                                                       | 0.00378342        | 0.00378342           | 0.322581           | -3.09999                     | T down vs N                            | 11.454  | 11.9893   | 16.7485    | 1         |
| cg18010718  | ZACN                                                                                        | 0.00016855        | 0.000168548          | 0.109558           | -9.12762                     | T down vs N                            | 23.765  | 45.7993   | 30.8343    | 1         |
| cg18010752  | WNT5A                                                                                       | 0.00064955        | 0.000649548          | 0.294577           | -3.39469                     | T down vs N                            | 17.816  | 13.9912   | 12.5653    | 1         |
| cg18011230  | PDE6A                                                                                       | 0.00053711        | 0.000537105          | 0.309735           | -3.22857                     | T down vs N                            | 18.593  | 12.8661   | 11.0717    | 1         |
| cg18014042  | CDKN1A;CDKN1A                                                                               | 2.27E-05          | 2.27E-05             | 0.181161           | -5.51997                     | T down vs N                            | 34.732  | 27.3355   | 12.5927    | 1         |
| cg18015266  | GATA1                                                                                       | 0.00010811        | 0.00010811           | 0.28642            | -3.49137                     | T down vs N                            | 25.959  | 14.6415   | 9.02448    | 1         |
| cg18015622  | LOC285627                                                                                   | 1.74E-06          | 1.74E-06             | 0.24702            | -4.04826                     | T down vs N                            | 53.505  | 18.3128   | 5.47617    | 1         |
| cg18016138  | NLRP6                                                                                       | 4.56E-05          | 4.56E-05             | 0.208931           | -4.78627                     | T down vs N                            | 30.593  | 22.9619   | 12.0091    | 1         |
| cg18016139  | KCNQ1                                                                                       | 0.00283636        | 0.00283636           | 0.256067           | -3.90522                     | T down vs N                            | 12.396  | 17.3827   | 22.4368    | 1         |
| cg18016181  | FOXD4                                                                                       | 0.00070687        | 0.00070687           | 3.98587            | 3.98587                      | T up vs N                              | 17.476  | 17.9082   | 16.3959    | 1         |
| cg18016826  | NSD1;NSD1                                                                                   | 0.00580928        | 0.00580928           | 5.01137            | 5.01137                      | T up vs N                              | 10.117  | 24.3296   | 38.4793    | 1         |
| cg18017531  | MRPS25                                                                                      | 0.00014205        | 0.000142052          | 0.255021           | -3.92125                     | T down vs N                            | 24.596  | 17.4874   | 11.376     | 1         |
| cg18018694  | COL24A1                                                                                     | 5.47E-08          | 5.47E-08             | 0.098834           | -10.118                      | T down vs N                            | 90.515  | 50.1658   | 8.86761    | 1         |
| cg18022927  | SNTG2                                                                                       | 5.70E-06          | 5.70E-06             | 0.069951           | -14.2957                     | T down vs N                            | 44.062  | 66.2691   | 24.0639    | 1         |
| cg18023251  | PMEPA1;PMEPA1;PMEPA1;PMEPA1                                                                 | 6.05E-06          | 6.05E-06             | 0.292584           | -3.41783                     | T down vs N                            | 43.626  | 14.1471   | 5.18851    | 1         |
| cg18023598  | HTR6                                                                                        | 0.00094369        | 0.000943693          | 4.01877            | 4.01877                      | T up vs N                              | 16.343  | 18.1218   | 17.742     | 1         |
| cg18024479  | TFPI2                                                                                       | 0.00709686        | 0.00709686           | 0.294879           | -3.39122                     | T down vs N                            | 9.5183  | 13.9678   | 23.4795    | 1         |
| cg18025275  | BIN3;FLJ14107                                                                               | 0.00481824        | 0.00481824           | 0.298688           | -3.34797                     | T down vs N                            | 10.69   | 13.6757   | 20.4684    | 1         |
| cg18025409  | TNFRSF9                                                                                     | 6.11E-05          | 6.11E-05             | 0.281052           | -3.55806                     | T down vs N                            | 28.965  | 15.088    | 8.33464    | 1         |
| cg18028470  | PIGV                                                                                        | 0.00028312        | 0.000283124          | 0.324914           | -3.07773                     | T down vs N                            | 21.356  | 11.8371   | 8.86848    | 1         |
| cg18029321  | PCDHA6;PCDHA2;PCDHA1;PCDHA7;PC<br>DHA1;PCDHA6;PCDHA5;PCDHA9;PCD<br>HA9;PCDHA3;PCDHA4;PCDHA8 | 4.31E-06          | 4.31E-06             | 7.57101            | 7.57101                      | T up vs N                              | 46.163  | 38.3816   | 13.3031    | 1         |

| Probeset ID | UCSC_REFGENE_NAME                                               | p-value<br>(Type) | p-value (T vs.<br>N) | Ratio (T<br>vs. N) | Fold-<br>Change (T<br>vs. N) | Fold-Change (T vs.<br>N) (Description) | F(Type) | SS (Type) | SS (Error) | F (Error) |
|-------------|-----------------------------------------------------------------|-------------------|----------------------|--------------------|------------------------------|----------------------------------------|---------|-----------|------------|-----------|
| cg18031596  | ANGPT1                                                          | 0.00028868        | 0.000288684          | 0.322561           | -3.10019                     | T down vs N                            | 21.268  | 11.9907   | 9.02043    | 1         |
| cg18031663  | E2F7                                                            | 4.49E-06          | 4.49E-06             | 0.151253           | -6.61144                     | T down vs N                            | 45.85   | 33.4144   | 11.6605    | 1         |
| cg18031675  | PRR15                                                           | 0.00110004        | 0.00110004           | 3.32041            | 3.32041                      | T up vs N                              | 15.758  | 13.4892   | 13.6963    | 1         |
| cg18033770  | CARD9;CARD9;DNLZ                                                | 7.27E-06          | 7.27E-06             | 3.39011            | 3.39011                      | T up vs N                              | 42.301  | 13.9603   | 5.28043    | 1         |
| cg18036081  | EMID1                                                           | 6.65E-05          | 6.65E-05             | 0.286363           | -3.49207                     | T down vs N                            | 28.507  | 14.6462   | 8.22032    | 1         |
| cg18036734  | B4GALT7                                                         | 7.55E-06          | 7.55E-06             | 0.322606           | -3.09976                     | T down vs N                            | 42.036  | 11.9877   | 4.56288    | 1         |
| cg18043888  | RHOD                                                            | 6.11E-05          | 6.11E-05             | 5.03192            | 5.03192                      | T up vs N                              | 28.968  | 24.4533   | 13.5065    | 1         |
| cg18044044  | OR7D4                                                           | 4.44E-05          | 4.44E-05             | 0.154402           | -6.47659                     | T down vs N                            | 30.749  | 32.6893   | 17.0097    | 1         |
| cg18045515  | CBX2;CBX2                                                       | 9.68E-05          | 9.68E-05             | 0.280825           | -3.56094                     | T down vs N                            | 26.524  | 15.1073   | 9.11328    | 1         |
| cg18046394  | WIPF3                                                           | 2.35E-05          | 2.35E-05             | 3.88921            | 3.88921                      | T up vs N                              | 34.507  | 17.278    | 8.01133    | 1         |
| cg18047159  | HAS2AS;HAS2                                                     | 0.0002982         | 0.000298202          | 0.167222           | -5.98006                     | T down vs N                            | 21.123  | 29.9575   | 22.6915    | 1         |
| cg18050233  | CCDC152;SEPP1;SEPP1;SEPP1                                       | 0.00116254        | 0.00116254           | 0.248451           | -4.02493                     | T down vs N                            | 15.55   | 18.1617   | 18.6869    | 1         |
| cg18052222  | OTOP2                                                           | 0.00030187        | 0.00030187           | 0.289707           | -3.45177                     | T down vs N                            | 21.069  | 14.3756   | 10.917     | 1         |
| cg18054578  | BBC3;BBC3;BBC3;BBC3;BBC3                                        | 8.34E-05          | 8.34E-05             | 0.329819           | -3.03197                     | T down vs N                            | 27.299  | 11.5237   | 6.75413    | 1         |
| cg18054674  | PCDHGA4;PCDHGA1;PCDHGA6;PCDHG<br>A5;PCDHGB1;PCDHGA3;PCDHGA2;PC  | 1.36E-05          | 1.36E-05             | 4.4261             | 4.4261                       | T up vs N                              | 38.008  | 20.7246   | 8.72435    | 1         |
|             | DHGA6;PCDHGB2;PCDHGB3                                           | 0.00061867        | 0.000618667          | 0.296187           | -3.37624                     | T down vs N                            | 18.013  | 13.8667   | 12.317     | 1         |
| cg18055557  | TNXB                                                            |                   |                      |                    |                              |                                        |         |           |            |           |
| cg18056600  | ZMYND15;CXCL16;CXCL16;ZMYND15<br>TNIK;TNIK;TNIK;TNIK;TNIK;TNIK; | 0.00329602        | 0.00329602           | 3.14944            | 3.14944                      | T up vs N                              | 11.9    | 12.327    | 16.574     | 1         |
| cg18058230  | TNIK                                                            | 0.00181257        | 0.00181257           | 0.306407           | -3.26363                     | T down vs N                            | 13.933  | 13.1043   | 15.0479    | 1         |
| cg18058747  | BHMT                                                            | 0.00014217        | 0.000142174          | 8.30633            | 8.30633                      | T up vs N                              | 24.591  | 41.9769   | 27.3117    | 1         |
| cg18059891  | C19orf46                                                        | 1.54E-05          | 1.54E-05             | 5.84294            | 5.84294                      | T up vs N                              | 37.169  | 29.1854   | 12.5633    | 1         |
| cg18060330  | BTNL2                                                           | 8.83E-06          | 8.83E-06             | 0.227816           | -4.38951                     | T down vs N                            | 40.933  | 20.494    | 8.01081    | 1         |
| cg18060742  | IL12B                                                           | 0.00022252        | 0.000222519          | 0.257273           | -3.88692                     | T down vs N                            | 22.455  | 17.263    | 12.3005    | 1         |
| cg18061255  | ITIH2                                                           | 2.63E-05          | 2.63E-05             | 0.173262           | -5.77159                     | T down vs N                            | 33.826  | 28.7806   | 13.6137    | 1         |
| cg18062651  | FUT6;FUT6                                                       | 0.00549113        | 0.00549113           | 0.267129           | -3.74351                     | T down vs N                            | 10.288  | 16.3202   | 25.382     | 1         |
| cg18064152  | TNFRSF10A                                                       | 0.00012055        | 0.000120551          | 4.64562            | 4.64562                      | T up vs N                              | 25.409  | 22.0954   | 13.9133    | 1         |
| cg18065174  | SIRT6                                                           | 0.00316233        | 0.00316233           | 0.210852           | -4.74267                     | T down vs N                            | 12.036  | 22.6942   | 30.1691    | 1         |
| cg18066001  | PSG8;PSG8;PSG8                                                  | 0.00125108        | 0.00125108           | 0.281924           | -3.54706                     | T down vs N                            | 15.277  | 15.0145   | 15.7254    | 1         |
| cg18067840  | BTNL2                                                           | 0.00032794        | 0.000327943          | 0.28863            | -3.46465                     | T down vs N                            | 20.702  | 14.4621   | 11.1776    | 1         |
| cg18068411  | PTER;PTER                                                       | 4.19E-06          | 4.19E-06             | 0.231529           | -4.31912                     | T down vs N                            | 46.369  | 20.0485   | 6.91784    | 1         |
| cg18069095  | TTC15                                                           | 0.00035924        | 0.000359237          | 3.24007            | 3.24007                      | T up vs N                              | 20.302  | 12.9443   | 10.2014    | 1         |
| cg18072282  | LGALS2                                                          | 0.00067141        | 0.000671407          | 0.289614           | -3.45287                     | T down vs N                            | 17.682  | 14.383    | 13.0146    | 1         |
| cg18074297  | CLIC6                                                           | 0.00649105        | 0.00649105           | 4.49985            | 4.49985                      | T up vs N                              | 9.7829  | 21.1876   | 34.6526    | 1         |
| cg18076399  | SNORD115-9;SNORD115-5;SNORD115-<br>12;SNORD115-10               | 0.00203989        | 0.00203989           | 0.292151           | -3.42289                     | T down vs N                            | 13.519  | 14.1812   | 16.7839    | 1         |
| cg18077032  | LOC100132724;AP4E1                                              | 0.00016155        | 0.000161551          | 0.305475           | -3.27359                     | T down vs N                            | 23.97   | 13.1719   | 8.79245    | 1         |
| cg18078658  | TPH2                                                            | 0.00057675        | 0.000576746          | 0.220286           | -4.53955                     | T down vs N                            | 18.3    | 21.4358   | 18.7422    | 1         |
| cg18079534  | LOC285627                                                       | 0.00015794        | 0.000157939          | 0.318976           | -3.13503                     | T down vs N                            | 24.079  | 12.2287   | 8.12577    | 1         |
| cg18081104  | THEM5;THEM5                                                     | 4.74E-05          | 4.74E-05             | 0.297826           | -3.35767                     | T down vs N                            | 30.377  | 13.7413   | 7.23773    | 1         |
| cg18082638  | PAX6;PAX6;PAX6                                                  | 7.30E-05          | 7.30E-05             | 7.4204             | 7.4204                       | T up vs N                              | 28.004  | 37.6234   | 21.496     | 1         |
| cg18084582  | ESR2;ESR2;ESR2                                                  | 3.99E-05          | 3.99E-05             | 0.224857           | -4.44727                     | T down vs N                            | 31.363  | 20.8578   | 10.6407    | 1         |
| cg18084999  | C6orf191                                                        | 0.00096627        | 0.000966272          | 0.243757           | -4.10245                     | T down vs N                            | 16.252  | 18.6627   | 18.3738    | 1         |
| cg18085033  | DLK1                                                            | 6.56E-05          | 6.56E-05             | 0.142267           | -7.02905                     | T down vs N                            | 28.582  | 35.6167   | 19.9382    | 1         |
| cg18085176  | AFAP1;AFAP1                                                     | 0.00449778        | 0.00449778           | 0.290877           | -3.43788                     | T down vs N                            | 10.905  | 14.2821   | 20.9551    | 1         |
| cg18086475  | TSEN2;TSEN2;TSEN2;TSEN2;TSEN2                                   | 3.16E-05          | 3.16E-05             | 0.196932           | -5.07788                     | T down vs N                            | 32.715  | 24.7293   | 12.0943    | 1         |
| cg18087023  | SPRR2D                                                          | 7.17E-06          | 7.17E-06             | 0.134419           | -7.43944                     | T down vs N                            | 42.402  | 37.7197   | 14.2333    | 1         |
| cg18087514  | KMO                                                             | 1.20E-05          | 1.20E-05             | 0.209204           | -4.78001                     | T down vs N                            | 38.834  | 22.9235   | 9.4448     | 1         |
| cg18089931  | GLO1                                                            | 0.00245982        | 0.00245982           | 0.282612           | -3.53842                     | T down vs N                            | 12.875  | 14.9567   | 18.5868    | 1         |
| cg18094401  | SNORD115-29;SNORD115-<br>36;SNORD115-43;SNORD115-11             | 0.00107812        | 0.00107812           | 0.266391           | -3.75388                     | T down vs N                            | 15.834  | 16.3887   | 16.5603    | 1         |
| cg18096956  | NLGN4X;NLGN4X                                                   | 0.00060042        | 0.000600419          | 0.322293           | -3.09665                     | T down vs N                            | 18.135  | 11.9664   | 10.5576    | 1         |
| cg18098286  | UGT1A10;UGT1A8                                                  | 0.00201265        | 0.00201265           | 0.309896           | -3.22689                     | T down vs N                            | 13.566  | 12.8547   | 15.1613    | 1         |
| cg18098769  | DNAH17                                                          | 0.00040706        | 0.000407059          | 0.327197           | -3.05626                     | T down vs N                            | 19.761  | 11.6901   | 9.46497    | 1         |
| cg18098839  | GOLIM4                                                          | 2.60E-05          | 2.60E-05             | 0.272711           | -3.66688                     | T down vs N                            | 33.901  | 15.8128   | 7.46303    | 1         |
| cg18099306  | ZNF493;ZNF493;ZNF493                                            | 6.62E-05          | 6.62E-05             | 0.188341           | -5.30951                     | T down vs N                            | 28.533  | 26.1056   | 14.6391    | 1         |
| cg18100237  | COL22A1                                                         | 2.26E-05          | 2.26E-05             | 0.292686           | -3.41663                     | T down vs N                            | 34.751  | 14.1391   | 6.50994    | 1         |
| cg18100564  | C11orf49;C11orf49;C11orf49;C11orf4<br>9                         | 0.00414468        | 0.00414468           | 0.304152           | -3.28783                     | T down vs N                            | 11.163  | 13.2685   | 19.0184    | 1         |
| cg18104242  | H19                                                             | 0.00069046        | 0.000690464          | 3.75877            | 3.75877                      | T up vs N                              | 17.57   | 16.4209   | 14.9537    | 1         |
| cg18106803  | MORN1                                                           | 0.00106835        | 0.00106835           | 0.239654           | -4.17269                     | T down vs N                            | 15.869  | 19.1143   | 19.2725    | 1         |
| cg18107144  | TINAGL1;TINAGL1                                                 | 3.66E-05          | 3.66E-05             | 5.01986            | 5.01986                      | T up vs N                              | 31.856  | 24.3807   | 12.2455    | 1         |
| cg18110822  | SUMF1;SUMF1;SUMF1                                               | 5.70E-05          | 5.70E-05             | 0.25182            | -3.9711                      | T down vs N                            | 29.346  | 17.8122   | 9.71151    | 1         |
| cg18111446  | IP6K1;IP6K1                                                     | 0.00460937        | 0.00460937           | 0.28955            | -3.45364                     | T down vs N                            | 10.828  | 14.3881   | 21.2601    | 1         |
| cg18114811  | TCL6                                                            | 6.15E-07          | 6.15E-07             | 0.2159             | -4.63178                     | T down vs N                            | 62.992  | 22.0096   | 5.59046    | 1         |
| cg18115248  | CYP2B6                                                          | 0.0013896         | 0.0013896            | 0.224849           | -4.44743                     | T down vs N                            | 14.89   | 20.8588   | 22.4144    | 1         |
| cg18115766  | RPL15                                                           | 1.43E-05          | 1.43E-05             | 0.2331             | -4.29001                     | T down vs N                            | 37.679  | 19.8635   | 8.43491    | 1         |
| cg18116154  | NMNAT3                                                          | 0.00294892        | 0.00294892           | 9.60159            | 9.60159                      | T up vs N                              | 12.266  | 47.9203   | 62.5061    | 1         |

| Probeset ID | UCSC_REFGENE_NAME                                                                       | p-value<br>(Type) | p-value (T vs.<br>N) | Ratio (T<br>vs. N) | Fold-<br>Change (T<br>vs. N) | Fold-Change (T vs.<br>N) (Description) | F(Type)     | SS (Type) | SS (Error) | F (Error) |
|-------------|-----------------------------------------------------------------------------------------|-------------------|----------------------|--------------------|------------------------------|----------------------------------------|-------------|-----------|------------|-----------|
| cg18116267  | SYNJ2                                                                                   | 0.00013157        | 0.000131569          | 5.56036            | 5.56036                      | T up vs N                              | 24.974      | 27.5693   | 17.663     | 1         |
| cg18116418  | LCE3D                                                                                   | 3.98E-06          | 3.98E-06             | 0.177211           | -5.64299                     | T down vs N                            | 46.766      | 28.0454   | 9.59517    | 1         |
| cg18116641  | NMNAT2                                                                                  | 6.50E-06          | 6.50E-06             | 0.276151           | -3.62121                     | T down vs N                            | 43.103      | 15.5092   | 5.75711    | 1         |
| cg18116971  | BRUNOL5                                                                                 | 0.00017384        | 0.000173844          | 6.8592             | 6.8592                       | T up vs N                              | 23.617      | 34.7288   | 23.5278    | 1         |
| cg18118198  | GZMB                                                                                    | 1.25E-05          | 1.25E-05             | 0.244582           | -4.08862                     | T down vs N                            | 38.543      | 18.5735   | 7.71029    | 1         |
| cg18118262  | PCDHGA4;PCDHGA9;PCDHGA1;PCDHGA11;PCDHGB3;PCDHGB7;PCDHGA6;PCDHG                          | 9.20E-05          | 9.20E-05             | 4.23412            | 4.23412                      | T up vs N                              | 26.789      | 19.5074   | 11.6509    | 1         |
|             | LCK                                                                                     | 5.82E-06          | 5.82E-06             | 0.283204           | -3.53102                     | T down vs N                            | 43.909      | 14.9072   | 5.43203    | 1         |
|             | IL1RAPL2;TEX13A                                                                         | 0.00013362        | 0.000133616          | 0.310286           | -3.22283                     | T down vs N                            | 24.897      | 12.8271   | 8.24325    | 1         |
|             | ACER3                                                                                   | 0.00039597        | 0.00039597           | 0.21868            | -4.57289                     | T down vs N                            | 19.88       | 21.6437   | 17.4194    | 1         |
|             | NSD1;NSD1                                                                               | 6.14E-05          | 6.14E-05             | 21.6609            | 21.6609                      | T up vs N                              | 28.934      | 88.5921   | 48.9893    | 1         |
|             | HSPA1L                                                                                  | 2.41E-05          | 2.41E-05             | 0.255947           | -3.90705                     | T down vs N                            | 34.353      | 17.3946   | 8.10166    | 1         |
|             | FAM101A                                                                                 | 0.00378841        | 0.00378841           | 0.280287           | -3.56778                     | T down vs N                            | 11.449      | 15.1529   | 21.1757    | 1         |
|             | TMCO2                                                                                   | 7.74E-05          | 7.74E-05             | 0.226502           | -4.41496                     | T down vs N                            | 27.693      | 20.6545   | 11.9334    | 1         |
|             | WARS;WDR25;WARS;WARS;WDR25;WARS;WARS;WARS                                               | 1.09E-05          | 1.09E-05             | 0.245596           | -4.07172                     | T down vs N                            | 39.503      | 18.4644   | 7.47872    | 1         |
|             | NR5A2;NR5A2                                                                             | 0.00021874        | 0.000218744          | 0.307335           | -3.25378                     | T down vs N                            | 22.534      | 13.0374   | 9.25688    | 1         |
| cg18126442  | LOC100132215                                                                            | 4.59E-06          | 4.59E-06             | 7.19735            | 7.19735                      | T up vs N                              | 45.683      | 36.4863   | 12.7791    | 1         |
| cg18126802  | DNM3;DNM3                                                                               | 0.00374936        | 0.00374936           | 0.292665           | -3.41687                     | T down vs N                            | 11.483      | 14.1407   | 19.704     | 1         |
| cg18128164  | JSRP1                                                                                   | 7.32E-05          | 7.32E-05             | 5.29891            | 5.29891                      | T up vs N                              | 27.989      | 26.0432   | 14.8877    | 1         |
| cg18128536  | IGF2BP1;IGF2BP1                                                                         | 0.00547804        | 0.00547804           | 0.268319           | -3.72691                     | T down vs N                            | 10.295      | 16.2105   | 25.1936    | 1         |
| cg18128969  | NCAM2                                                                                   | 0.00113434        | 0.00113434           | 6.96461            | 6.96461                      | T up vs N                              | 15.643      | 35.2811   | 36.0874    | 1         |
| cg18129748  | MST1R                                                                                   | 0.00047604        | 0.00047604           | 3.53845            | 3.53845                      | T up vs N                              | 19.097      | 14.9569   | 12.5316    | 1         |
| cg18131810  | SPEG                                                                                    | 0.00012281        | 0.000122806          | 0.31817            | 3.01817                      | T up vs N                              | 25.317      | 11.4291   | 7.22317    | 1         |
| cg18132228  | PRTG                                                                                    | 8.16E-06          | 8.16E-06             | 3.72527            | 3.72527                      | T up vs N                              | 41.486      | 16.1996   | 6.2478     | 1         |
| cg18132964  | TIAM2;TIAM2                                                                             | 1.17E-05          | 1.17E-05             | 0.214552           | -4.66089                     | T down vs N                            | 39.002      | 22.1899   | 9.10313    | 1         |
| cg18133076  | GPR111                                                                                  | 0.00053119        | 0.000531191          | 0.305498           | -3.27335                     | T down vs N                            | 18.639      | 13.1703   | 11.3056    | 1         |
| cg18134262  | PCDHA7;PCDHA13;PCDHA12;PCDHA6;PCDHA10;PCDHA4;PCDHA11;PCDHA8;PCDHA1;PCDHA2;PCDHA6;PCDHA1 | 0.00014131        | 0.000141313          | 3.03964            | 3.03964                      | T up vs N                              | 24.621      | 11.5762   | 7.52279    | 1         |
|             | CSR1P;CSR1P                                                                             | 0.0006111         | 0.000611104          | 3.7469             | 3.7469                       | T up vs N                              | 18.063      | 16.3426   | 14.476     | 1         |
|             | IL13RA2                                                                                 | 0.0002594         | 0.000259397          | 0.23343            | -4.28395                     | T down vs N                            | 21.751      | 19.825    | 14.583     | 1         |
|             | LELP1                                                                                   | 1.95E-06          | 1.95E-06             | 0.217095           | -4.60629                     | T down vs N                            | 52.524      | 21.8514   | 6.65643    | 1         |
|             | OR10A3                                                                                  | 0.0010925         | 0.0010925            | 0.17382            | -5.75309                     | T down vs N                            | 15.784      | 28.6752   | 29.0674    | 1         |
|             | HAPLN2                                                                                  | 0.00010984        | 0.00010984           | 5.1034             | 5.1034                       | T up vs N                              | 25.878      | 24.8821   | 15.3842    | 1         |
|             | MED12L;P2RY12                                                                           | 0.00013765        | 0.00013765           | 0.277585           | -3.6025                      | T down vs N                            | 24.75       | 15.3846   | 9.94549    | 1         |
|             | SLC29A2                                                                                 | 4.75E-05          | 4.75E-05             | 0.132883           | -7.52541                     | T down vs N                            | 30.358      | 38.1528   | 20.108     | 1         |
|             | REG3G;REG3G                                                                             | 0.00050229        | 0.000502288          | 0.319597           | -3.12894                     | T down vs N                            | 18.872      | 12.1871   | 10.3326    | 1         |
|             | IL4;IL4                                                                                 | 4.04E-05          | 4.04E-05             | 0.179814           | -5.56131                     | T down vs N                            | 31.29       | 27.5748   | 14.1001    | 1         |
|             | VAX2                                                                                    | 0.00272806        | 0.00272806           | 0.220194           | -4.54145                     | T down vs N                            | 12.526      | 21.4477   | 27.3962    | 1         |
|             | STRA8                                                                                   | 0.0002405         | 0.000240497          | 0.240215           | -4.16294                     | T down vs N                            | 22.097      | 19.0518   | 13.7952    | 1         |
|             | HTR2C;MIR1298                                                                           | 0.00033254        | 0.000332535          | 0.295805           | -3.38061                     | T down vs N                            | 20.64       | 13.8962   | 10.7721    | 1         |
|             | GHRHR;GHRHR                                                                             | 4.26E-06          | 4.26E-06             | 0.255972           | -3.90667                     | T down vs N                            | 46.25       | 17.3922   | 6.01675    | 1         |
|             | OR5M10;OR8U8                                                                            | 4.28E-05          | 4.28E-05             | 0.32335            | -3.09262                     | T down vs N                            | 30.958      | 11.9389   | 6.17039    | 1         |
|             | C20orf141;LOC100288797                                                                  | 3.97E-05          | 3.97E-05             | 0.277362           | -3.6054                      | T down vs N                            | 31.378      | 15.4039   | 7.85462    | 1         |
|             | CASR;CASR                                                                               | 0.00048564        | 0.000485639          | 3.7367             | 3.7367                       | T up vs N                              | 19.013      | 16.2752   | 13.6962    | 1         |
|             | EIF4E;EIF4E;EIF4E;EIF4E;EIF4E                                                           | 0.0002368         | 0.000236803          | 0.279658           | -3.57579                     | T down vs N                            | 22.168      | 15.2064   | 10.9755    | 1         |
|             | KRT72;KRT72;KRT72;KRT72;KRT72;KRT72                                                     | 9.91E-06          | 9.91E-06             | 13.3431            | 13.3431                      | T up vs N                              | 40.129      | 62.8776   | 25.0704    | 1         |
|             | cg18162838                                                                              | HK1;HK1;HK1;HK1   | 0.00032182           | 0.000321822        | 0.250922                     | -3.98531                               | T down vs N | 20.785    | 17.9046    | 13.7829   |
| cg18164281  | LOC100288797                                                                            | 0.000113          | 0.000113003          | 0.327511           | -3.05333                     | T down vs N                            | 25.735      | 11.67     | 7.25562    | 1         |
| cg18164784  | PCDHGA4;PCDHGA6;PCDHGA1;PCDHGA5;PCDHGB1;PCDHGA3;PCDHGA2;PCDHGB2;PCDHGA7;PCDHGA7;PCDHGB3 | 0.00053067        | 0.000530668          | 6.58622            | 6.58622                      | T up vs N                              | 18.643      | 33.2793   | 28.5614    | 1         |
|             | FOXP1                                                                                   | 0.0004055         | 0.000405498          | 0.234009           | -4.27333                     | T down vs N                            | 19.778      | 19.7574   | 15.9834    | 1         |
|             | SNORD115-10;SNORD115-42                                                                 | 0.00011272        | 0.000112718          | 0.204944           | -4.87938                     | T down vs N                            | 25.747      | 23.5304   | 14.6224    | 1         |
|             | KIAA1033                                                                                | 8.58E-06          | 8.58E-06             | 0.277777           | -3.6                         | T down vs N                            | 41.131      | 15.3679   | 5.97812    | 1         |
|             | GFRA3                                                                                   | 0.00075644        | 0.000756439          | 0.230839           | -4.33203                     | T down vs N                            | 17.206      | 20.1303   | 18.7192    | 1         |
|             | CAD                                                                                     | 2.72E-05          | 2.72E-05             | 0.184168           | -5.42984                     | T down vs N                            | 33.617      | 26.8112   | 12.7606    | 1         |
|             | BACE2;BACE2;BACE2                                                                       | 2.05E-05          | 2.05E-05             | 0.280616           | -3.56359                     | T down vs N                            | 35.367      | 15.1249   | 6.8425     | 1         |
|             | IRAK3;IRAK3                                                                             | 0.00195082        | 0.00195082           | 3.76842            | 3.76842                      | T up vs N                              | 13.675      | 16.4846   | 19.2876    | 1         |
|             | GP5                                                                                     | 5.21E-05          | 5.21E-05             | 8.04319            | 8.04319                      | T up vs N                              | 29.845      | 40.71     | 21.8249    | 1         |
|             | ACOT11;ACOT11                                                                           | 5.17E-05          | 5.17E-05             | 0.248747           | -4.02015                     | T down vs N                            | 29.888      | 18.1307   | 9.70599    | 1         |
|             | FLJ41350                                                                                | 9.11E-06          | 9.11E-06             | 0.307641           | -3.25055                     | T down vs N                            | 40.711      | 13.0154   | 5.1152     | 1         |
|             | DES;DES                                                                                 | 0.00566454        | 0.00566454           | 9.8571             | 9.8571                       | T up vs N                              | 10.193      | 49.0396   | 76.9776    | 1         |
|             | TRPC4;TRPC4;TRPC4;TRPC4;TRPC4;TRPC4                                                     | 0.00190598        | 0.00190598           | 0.250516           | -3.99176                     | T down vs N                            | 13.756      | 17.9465   | 20.8736    | 1         |
|             | IGF2BP1;IGF2BP1                                                                         | 8.73E-07          | 8.73E-07             | 0.149879           | -6.67205                     | T down vs N                            | 59.651      | 33.7381   | 9.04942    | 1         |

| Probeset ID | UCSC_REFGENE_NAME                                                                       | p-value<br>(Type) | p-value (T vs.<br>N) | Ratio (T<br>vs. N) | Fold-<br>Change (T<br>vs. N) | Fold-Change (T vs.<br>N) (Description) | F(Type) | SS (Type) | SS (Error) | F (Error) |
|-------------|-----------------------------------------------------------------------------------------|-------------------|----------------------|--------------------|------------------------------|----------------------------------------|---------|-----------|------------|-----------|
| cg18183941  | NLRP3;NLRP3                                                                             | 0.00013559        | 0.00013559           | 0.226811           | -4.40895                     | T down vs N                            | 24.825  | 20.6166   | 13.2878    | 1         |
| cg18185971  | PLK1S1;PLK1S1;PLK1S1                                                                    | 0.0001656         | 0.000165602          | 0.286899           | -3.48555                     | T down vs N                            | 23.85   | 14.6024   | 9.79613    | 1         |
| cg18185987  | GPR65                                                                                   | 8.41E-05          | 8.41E-05             | 0.313178           | -3.19308                     | T down vs N                            | 27.257  | 12.6245   | 7.41064    | 1         |
| cg18192906  | NOTCH4                                                                                  | 6.60E-05          | 6.60E-05             | 0.288156           | -3.47034                     | T down vs N                            | 28.543  | 14.5004   | 8.12827    | 1         |
| cg18193127  | GPR133                                                                                  | 0.00069872        | 0.000698723          | 0.31634            | -3.16116                     | T down vs N                            | 17.522  | 12.407    | 11.3291    | 1         |
| cg18196900  | MAP6D1                                                                                  | 6.55E-05          | 6.55E-05             | 5.40043            | 5.40043                      | T up vs N                              | 28.586  | 26.6394   | 14.9105    | 1         |
| cg18197332  | FAM50B                                                                                  | 0.00045102        | 0.000451016          | 3.91477            | 3.91477                      | T up vs N                              | 19.324  | 17.445    | 14.4439    | 1         |
| cg18198545  | PEX19;PEX19                                                                             | 0.00010481        | 0.000104805          | 0.145699           | -6.86346                     | T down vs N                            | 26.117  | 34.7512   | 21.2897    | 1         |
| cg18201077  | RSAD2                                                                                   | 0.00106562        | 0.00106562           | 0.172124           | -5.80978                     | T down vs N                            | 15.878  | 28.9975   | 29.2197    | 1         |
| cg18204685  | BTDR;HACL1                                                                              | 4.69E-05          | 4.69E-05             | 0.309646           | -3.22949                     | T down vs N                            | 30.434  | 12.8723   | 6.76741    | 1         |
| cg18206481  | LMX1A                                                                                   | 0.00371629        | 0.00371629           | 3.25603            | 3.25603                      | T up vs N                              | 11.511  | 13.0527   | 18.1429    | 1         |
| cg18207011  | RAD51L1;RAD51L1;RAD51L1                                                                 | 0.00056427        | 0.000564271          | 0.319604           | -3.12888                     | T down vs N                            | 18.389  | 12.1867   | 10.6032    | 1         |
| cg18207141  | MRPS18B;PPP1R10                                                                         | 0.00132881        | 0.00132881           | 20.8201            | 20.8201                      | T up vs N                              | 31.831  | 16.7856   | 3.16404    | 1         |
| cg18208171  | HMG20A                                                                                  | 0.00578189        | 0.00578189           | 0.281377           | -3.55395                     | T down vs N                            | 10.131  | 15.0605   | 23.7858    | 1         |
| cg18210221  | DHCR7;DHCR7                                                                             | 0.00173102        | 0.00173102           | 0.236506           | -4.22822                     | T down vs N                            | 14.097  | 19.4697   | 22.0984    | 1         |
| cg18214799  | SCAR82                                                                                  | 0.00485521        | 0.00485521           | 3.08985            | -3.08985                     | T up vs N                              | 12.343  | 8.55789   | 7.6265     | 1         |
| cg18216249  | RPAP3;RPAP3;RPAP3                                                                       | 2.93E-07          | 2.93E-07             | 0.218603           | -4.5745                      | T down vs N                            | 70.553  | 21.6538   | 4.91064    | 1         |
| cg18217668  | NACA2                                                                                   | 0.00016849        | 0.000168494          | 0.199789           | -5.00529                     | T down vs N                            | 23.767  | 24.293    | 16.3541    | 1         |
| cg18219418  | PARP6;PARP6                                                                             | 0.00054501        | 0.000545011          | 0.317635           | -3.14827                     | T down vs N                            | 18.533  | 12.3191   | 10.6356    | 1         |
| cg18221168  | OGDHL;OGDHL;OGDHL                                                                       | 5.90E-06          | 5.90E-06             | 0.160992           | -6.2115                      | T down vs N                            | 43.813  | 31.2431   | 11.4095    | 1         |
| cg18221429  | LRR6C1;ACTR3C;LRR6C1                                                                    | 0.00103344        | 0.00103344           | 3.83532            | 3.83532                      | T up vs N                              | 15.995  | 16.9248   | 16.9303    | 1         |
| cg18222192  | ODZ4                                                                                    | 0.00120823        | 0.00120823           | 0.291732           | -3.42781                     | T down vs N                            | 15.406  | 14.2144   | 14.7622    | 1         |
| cg18224395  | RCN3                                                                                    | 0.00013215        | 0.000132149          | 0.247381           | -4.04235                     | T down vs N                            | 24.952  | 18.2745   | 11.7183    | 1         |
| cg18224993  | ODZ4                                                                                    | 0.00016114        | 0.000161143          | 0.259665           | -3.85112                     | T down vs N                            | 23.982  | 17.0285   | 11.361     | 1         |
| cg18225577  | TRPM4                                                                                   | 0.00125133        | 0.00125133           | 3.74556            | 3.74556                      | T up vs N                              | 15.276  | 16.3338   | 17.108     | 1         |
| cg18229049  | NXN                                                                                     | 0.00279138        | 0.00279138           | 0.302823           | -3.30226                     | T down vs N                            | 12.449  | 13.3663   | 17.1788    | 1         |
| cg18229820  | SELE                                                                                    | 0.00012033        | 0.000120334          | 0.226571           | -4.41363                     | T down vs N                            | 25.418  | 20.6461   | 12.996     | 1         |
| cg18231319  | YARS2                                                                                   | 5.17E-06          | 5.17E-06             | 0.161799           | -6.18051                     | T down vs N                            | 44.795  | 31.0722   | 11.0986    | 1         |
| cg18233411  | LOC552889;LOC552889                                                                     | 0.00085301        | 0.000853008          | 0.313503           | -3.18977                     | T down vs N                            | 16.734  | 12.602    | 12.0493    | 1         |
| cg18235100  | PRDM8;PRDM8                                                                             | 1.03E-05          | 1.03E-05             | 11.9019            | 11.9019                      | T up vs N                              | 39.888  | 57.4524   | 23.0456    | 1         |
| cg18236464  | PAPPA2;PAPPA2                                                                           | 6.93E-05          | 6.93E-05             | 0.233646           | -4.27998                     | T down vs N                            | 28.283  | 19.7997   | 11.2008    | 1         |
| cg18237548  | ERI1                                                                                    | 1.32E-05          | 1.32E-05             | 0.175315           | -5.70401                     | T down vs N                            | 38.212  | 28.3951   | 11.8895    | 1         |
| cg18239253  | DEFB132                                                                                 | 0.00017281        | 0.000172806          | 0.332596           | -3.00665                     | T down vs N                            | 23.646  | 11.3501   | 7.68007    | 1         |
| cg18239942  | PACS2;PACS2                                                                             | 6.73E-05          | 6.73E-05             | 4.27369            | 4.27369                      | T up vs N                              | 28.443  | 19.7597   | 11.1155    | 1         |
| cg18242400  | LPNH3                                                                                   | 0.00012519        | 0.000125192          | 0.21625            | -4.62428                     | T down vs N                            | 25.22   | 21.9631   | 13.9335    | 1         |
| cg18243760  | PRRT1                                                                                   | 0.00062238        | 0.000622379          | 3.69825            | 3.69825                      | T up vs N                              | 17.989  | 16.0208   | 14.2496    | 1         |
| cg18243910  | TAP2;TAP2                                                                               | 0.00038078        | 0.000380778          | 0.315027           | -3.17433                     | T down vs N                            | 20.049  | 12.4968   | 9.97299    | 1         |
| cg18244508  | NOTCH4                                                                                  | 2.87E-07          | 2.87E-07             | 0.219241           | -4.5612                      | T down vs N                            | 70.757  | 21.5709   | 4.87771    | 1         |
| cg18250838  | CRABP1                                                                                  | 0.00071057        | 0.000710569          | 3.57242            | 3.57242                      | T up vs N                              | 17.455  | 15.1839   | 13.9182    | 1         |
| cg18253764  | MAGEL2                                                                                  | 0.00010555        | 0.000105545          | 0.259583           | -3.85234                     | T down vs N                            | 27.153  | 16.0343   | 8.85784    | 1         |
| cg18256471  | RLN3                                                                                    | 1.18E-06          | 1.18E-06             | 0.248697           | -4.02096                     | T down vs N                            | 56.861  | 18.136    | 5.10329    | 1         |
| cg18256640  | ATP10A                                                                                  | 0.00018905        | 0.000189048          | 0.166151           | -6.01863                     | T down vs N                            | 23.218  | 30.1733   | 20.7927    | 1         |
| cg18257955  | SNORD115-15;SNORD115-21;SNORD115-22                                                     | 0.00057437        | 0.000574369          | 0.144295           | -6.93024                     | T down vs N                            | 18.317  | 35.1014   | 30.6621    | 1         |
| cg18259003  | KIF19                                                                                   | 0.00060315        | 0.000603145          | 3.55921            | 3.55921                      | T up vs N                              | 18.117  | 15.0957   | 13.3321    | 1         |
| cg18264219  | CCL23;CCL23                                                                             | 0.00022496        | 0.00022496           | 0.170848           | -5.85317                     | T down vs N                            | 22.405  | 29.2433   | 20.8839    | 1         |
| cg18267124  | FIP1L1;FIP1L1;FIP1L1                                                                    | 6.07E-06          | 6.07E-06             | 0.24879            | -4.01945                     | T down vs N                            | 43.61   | 18.1262   | 6.65031    | 1         |
| cg18267489  | CD93                                                                                    | 2.84E-07          | 2.84E-07             | 0.101671           | -9.83562                     | T down vs N                            | 70.869  | 48.9461   | 11.0505    | 1         |
| cg18269526  | AP2A2                                                                                   | 0.00542576        | 0.00542576           | 3.28423            | 3.28423                      | T up vs N                              | 10.324  | 13.2441   | 20.525     | 1         |
| cg18271897  | SEPT9;SEPT9;SEPT9                                                                       | 3.30E-05          | 3.30E-05             | 0.253123           | -3.95065                     | T down vs N                            | 32.464  | 17.6791   | 8.71307    | 1         |
| cg18276125  | C10orf2;C10orf2;C10orf2                                                                 | 1.41E-06          | 1.41E-06             | 0.059747           | -16.7373                     | T down vs N                            | 55.313  | 74.359    | 21.5092    | 1         |
| cg18276155  | MCC;MCC                                                                                 | 0.00020139        | 0.000201394          | 0.29402            | -3.40113                     | T down vs N                            | 22.92   | 14.0346   | 9.97919    | 1         |
| cg18277815  | MRFAP1                                                                                  | 0.00184923        | 0.00184923           | 0.290313           | -3.44456                     | T down vs N                            | 13.863  | 14.3271   | 16.5359    | 1         |
| cg18278519  | DNTT;DNTT                                                                               | 1.13E-05          | 1.13E-05             | 0.307658           | -3.25037                     | T down vs N                            | 39.209  | 13.0142   | 5.31065    | 1         |
| cg18279776  | FOXK1                                                                                   | 7.42E-05          | 7.42E-05             | 3.33254            | 3.33254                      | T up vs N                              | 27.918  | 13.5713   | 7.77779    | 1         |
| cg18282375  | HSPA12B                                                                                 | 4.49E-05          | 4.49E-05             | 3.81849            | 3.81849                      | T up vs N                              | 30.675  | 16.8143   | 8.77041    | 1         |
| cg18283342  | PCDHA6;PCDHA2;PCDHA1;PCDHA9;PCDHA7;PCDHA1;PCDHA6;PCDHA10;PCDHA5;PCDHA3;PCDHA4;PCDHA10;P | 2.55E-05          | 2.55E-05             | 7.56366            | 7.56366                      | T up vs N                              | 34.018  | 38.3448   | 18.0351    | 1         |
| cg18286323  | HCCA2                                                                                   | 0.00397494        | 0.00397494           | 0.317378           | -3.15082                     | T down vs N                            | 11.296  | 12.3365   | 17.4744    | 1         |
| cg18287241  | ODZ2                                                                                    | 7.54E-05          | 7.54E-05             | 3.18138            | 3.18138                      | T up vs N                              | 27.83   | 12.5448   | 7.21223    | 1         |
| cg18288119  | CHRN2                                                                                   | 2.23E-05          | 2.23E-05             | 0.289352           | -3.456                       | T down vs N                            | 34.822  | 14.404    | 6.61834    | 1         |
| cg18294707  | RNASE2                                                                                  | 2.04E-05          | 2.04E-05             | 0.239714           | -4.17164                     | T down vs N                            | 35.382  | 19.1076   | 8.6405     | 1         |
| cg18298050  | ASPHD2                                                                                  | 1.65E-07          | 1.65E-07             | 0.312505           | -3.19994                     | T down vs N                            | 76.95   | 12.6713   | 2.6347     | 1         |
| cg18301423  | PDLIM4;PDLIM4                                                                           | 2.31E-05          | 2.31E-05             | 12.1419            | 12.1419                      | T up vs N                              | 34.615  | 58.3825   | 26.9859    | 1         |
| cg18303410  | USP36                                                                                   | 0.00030069        | 0.000300694          | 0.313971           | -3.18501                     | T down vs N                            | 21.086  | 12.5695   | 9.53764    | 1         |
| cg18304448  | MGC45800                                                                                | 0.0002084         | 0.000208404          | 5.2265             | 5.2265                       | T up vs N                              | 22.76   | 25.6152   | 18.0072    | 1         |
| cg18306861  | PLEK2                                                                                   | 0.00094574        | 0.000945736          | 3.55403            | 3.55403                      | T up vs N                              | 16.334  | 15.0611   | 14.753     | 1         |
| cg18313543  | NRS5A2;NRS5A2                                                                           | 8.40E-06          | 8.40E-06             | 0.24611            | -4.06323                     | T down vs N                            | 41.28   | 18.4096   | 7.13552    | 1         |
| cg18314690  | RPA3                                                                                    | 0.00048877        | 0.000488773          | 0.283733           | -3.52444                     | T down vs N                            | 18.986  | 14.8631   | 12.5257    | 1         |
| cg18315861  | OR2T11                                                                                  | 1.26E-06          | 1.26E-06             | 0.146888           | -6.80789                     | T down vs N                            | 56.296  | 34.4585   | 9.7935     | 1         |

| Probeset ID | UCSC_REFGENE_NAME                  | p-value<br>(Type) | p-value (T vs.<br>N) | Ratio (T<br>vs. N) | Fold-<br>Change (T<br>vs. N) | Fold-Change (T vs.<br>N) (Description) | F(Type) | SS (Type) | SS (Error) | F (Error) |
|-------------|------------------------------------|-------------------|----------------------|--------------------|------------------------------|----------------------------------------|---------|-----------|------------|-----------|
| cg18316974  | GFI1;GFI1;GFI1                     | 0.00098441        | 0.00098441           | 5.31501            | 5.31501                      | T up vs N                              | 16.18   | 26.138    | 25.8468    | 1         |
| cg18317154  | ATF3                               | 0.00101367        | 0.00101367           | 0.304915           | -3.2796                      | T down vs N                            | 16.068  | 13.2127   | 13.1565    | 1         |
| cg18319366  | HAS2AS;HAS2                        | 0.00078762        | 0.000787617          | 0.247636           | -4.03819                     | T down vs N                            | 17.047  | 18.2476   | 17.1272    | 1         |
| cg18319754  | POLR3B;POLR3B                      | 1.81E-05          | 1.81E-05             | 0.18356            | -5.44781                     | T down vs N                            | 36.144  | 26.916    | 11.9149    | 1         |
| cg18323376  | DEFB123                            | 0.00153892        | 0.00153892           | 0.281579           | -3.5514                      | T down vs N                            | 14.518  | 15.0435   | 16.5787    | 1         |
| cg18328206  | RASSF5;RASSF5                      | 0.00159785        | 0.00159785           | 12.065             | 12.065                       | T up vs N                              | 14.383  | 58.0855   | 64.6158    | 1         |
| cg18328755  | C1orf94;C1orf94;C1orf94            | 0.00088717        | 0.000887168          | 4.88586            | 4.88586                      | T up vs N                              | 16.581  | 23.5699   | 22.7437    | 1         |
| cg18331412  | TGFB1                              | 2.07E-05          | 2.07E-05             | 9.25908            | 9.25908                      | T up vs N                              | 35.298  | 46.3935   | 21.0295    | 1         |
| cg18331619  | TNXB                               | 0.00246192        | 0.00246192           | 0.290201           | -3.44589                     | T down vs N                            | 12.872  | 14.336    | 17.8195    | 1         |
| cg18333041  | CLSTN2                             | 0.0004347         | 0.0004347            | 0.233007           | -4.29171                     | T down vs N                            | 19.481  | 19.8744   | 16.3233    | 1         |
| cg18334681  | ENPP3                              | 3.88E-05          | 3.88E-05             | 0.256374           | -3.90056                     | T down vs N                            | 31.524  | 17.3522   | 8.80698    | 1         |
| cg18336674  | TLX3                               | 0.00485321        | 0.00485321           | 4.06362            | 4.06362                      | T up vs N                              | 10.668  | 18.4121   | 27.6154    | 1         |
| cg18336878  | SULT1E1                            | 0.00418931        | 0.00418931           | 0.320633           | -3.11883                     | T down vs N                            | 11.129  | 12.118    | 17.4223    | 1         |
| cg18340188  | PARK2;PARK2;PARK2                  | 2.77E-07          | 2.77E-07             | 0.132034           | -7.57382                     | T down vs N                            | 71.16   | 38.3956   | 8.63308    | 1         |
| cg18342703  | FOXP1;FOXP1                        | 1.35E-07          | 1.35E-07             | 0.319917           | -3.12581                     | T down vs N                            | 79.247  | 12.1657   | 2.45626    | 1         |
| cg18343292  | MS4A7;MS4A7;MS4A7;MS4A7            | 8.51E-05          | 8.51E-05             | 0.147791           | -6.76633                     | T down vs N                            | 27.193  | 34.2388   | 20.1456    | 1         |
| cg18347921  | HLA-J;NCRNA00171                   | 0.00635638        | 0.00635638           | 3.87496            | 3.87496                      | T up vs N                              | 9.8455  | 17.1847   | 27.927     | 1         |
| cg18348690  | S100A10                            | 0.0002167         | 0.000216696          | 0.228364           | -4.37897                     | T down vs N                            | 22.578  | 20.4274   | 14.4759    | 1         |
| cg18348830  | LRTM1;CACNA2D3;LRTM1               | 1.28E-06          | 1.28E-06             | 0.262066           | -3.81584                     | T down vs N                            | 56.149  | 16.7968   | 4.78632    | 1         |
| cg18350545  | OR2M1P                             | 1.96E-05          | 1.96E-05             | 0.198763           | -5.03112                     | T down vs N                            | 35.647  | 24.4485   | 10.9736    | 1         |
| cg18352935  | ORS1F2                             | 0.00025856        | 0.000258563          | 0.168571           | -5.93221                     | T down vs N                            | 21.766  | 29.689    | 21.8242    | 1         |
| cg18356785  | C1QTNF4                            | 0.00042832        | 0.000428315          | 7.30353            | 7.30353                      | T up vs N                              | 19.544  | 37.0297   | 30.3153    | 1         |
| cg18358136  | EML2                               | 4.18E-05          | 4.18E-05             | 4.02924            | 4.02924                      | T up vs N                              | 31.086  | 18.1896   | 9.36221    | 1         |
| cg18364707  | KLK4                               | 2.39E-05          | 2.39E-05             | 0.216041           | -4.62876                     | T down vs N                            | 34.399  | 21.9909   | 10.2285    | 1         |
| cg18366919  | EPHX3;EPHX3                        | 6.34E-06          | 6.34E-06             | 11.788             | 11.788                       | T up vs N                              | 43.285  | 57.007    | 21.0723    | 1         |
| cg18368599  | CYP27C1                            | 0.00040806        | 0.000408057          | 0.228758           | -4.37143                     | T down vs N                            | 19.751  | 20.3797   | 16.5094    | 1         |
| cg18369654  | HFE2;HFE2;HFE2;HFE2                | 0.00076813        | 0.000768126          | 0.276027           | -3.62284                     | T down vs N                            | 17.146  | 15.52     | 14.4831    | 1         |
| cg18369913  | OR4C46                             | 2.53E-05          | 2.53E-05             | 0.269403           | -3.71191                     | T down vs N                            | 34.055  | 16.1113   | 7.56957    | 1         |
| cg18370764  | NPC1L1;NPC1L1                      | 0.00013725        | 0.000137248          | 0.328483           | -3.0443                      | T down vs N                            | 24.765  | 11.6082   | 7.4998     | 1         |
| cg18372607  | PAX6;PAX6;PAX6                     | 0.00221511        | 0.00221511           | 3.72921            | 3.72921                      | T up vs N                              | 13.234  | 16.2257   | 19.6176    | 1         |
| cg18373158  | PRKCA                              | 0.00152618        | 0.00152618           | 0.245573           | -4.07211                     | T down vs N                            | 14.549  | 18.467    | 20.3095    | 1         |
| cg18374914  | HAVCR2                             | 2.34E-05          | 2.34E-05             | 0.183009           | -5.4642                      | T down vs N                            | 34.534  | 27.0115   | 12.5146    | 1         |
| cg18375441  | FGF2                               | 1.08E-05          | 1.08E-05             | 0.311986           | -3.20527                     | T down vs N                            | 39.575  | 12.7075   | 5.13755    | 1         |
| cg18376306  | RABGGTB;SNORD45B                   | 9.01E-05          | 9.01E-05             | 0.257282           | -3.88679                     | T down vs N                            | 26.897  | 17.2621   | 10.2685    | 1         |
| cg18378811  | ARSL;ARSL                          | 1.15E-05          | 1.15E-05             | 6.68511            | 6.68511                      | T up vs N                              | 39.144  | 33.8077   | 13.8188    | 1         |
| cg18383813  | C11orf20                           | 5.51E-05          | 5.51E-05             | 4.94284            | 4.94284                      | T up vs N                              | 29.531  | 23.9157   | 12.9577    | 1         |
| cg18384712  | FAM55D;FAM55D                      | 0.00021368        | 0.000213682          | 0.207551           | -4.81809                     | T down vs N                            | 22.643  | 23.1566   | 16.3627    | 1         |
| cg18384926  | C15orf48;C15orf48                  | 3.78E-05          | 3.78E-05             | 12.5606            | 12.5606                      | T up vs N                              | 31.672  | 59.9785   | 30.3002    | 1         |
| cg18385570  | OR7C2                              | 0.00369725        | 0.00369725           | 0.278846           | -3.58621                     | T down vs N                            | 11.528  | 15.276    | 21.2027    | 1         |
| cg18388786  | GPR123                             | 8.35E-05          | 8.35E-05             | 0.278391           | -3.59207                     | T down vs N                            | 27.29   | 15.315    | 8.97908    | 1         |
| cg18390152  | FAM9A;FAM9A                        | 0.00015802        | 0.000158023          | 0.240091           | -4.16509                     | T down vs N                            | 24.076  | 19.0655   | 12.6701    | 1         |
| cg18391099  | TBXAS1;TBXAS1;TBXAS1;TBXAS1;TBXAS1 | 0.00034007        | 0.000340074          | 0.245687           | -4.07021                     | T down vs N                            | 20.542  | 18.4547   | 14.3745    | 1         |
| cg18392783  | PRKDCBP                            | 2.74E-05          | 2.74E-05             | 5.35508            | 5.35508                      | T up vs N                              | 33.573  | 26.3736   | 12.5689    | 1         |
| cg18394567  | RAP1GAP2;RAP1GAP2                  | 0.0054184         | 0.0054184            | 3.23778            | 3.23778                      | T up vs N                              | 10.328  | 12.9287   | 20.0282    | 1         |
| cg18395189  | HRNR                               | 1.19E-06          | 1.19E-06             | 0.267071           | -3.74432                     | T down vs N                            | 56.835  | 16.3255   | 4.59595    | 1         |
| cg18397073  | POU2F2                             | 0.00090593        | 0.000905929          | 9.72018            | 9.72018                      | T up vs N                              | 16.5    | 48.4418   | 46.9736    | 1         |
| cg18398753  | STX6                               | 0.00051502        | 0.000515021          | 3.09264            | 3.09264                      | T up vs N                              | 18.767  | 11.939    | 10.1786    | 1         |
| cg18399834  | MMADHC                             | 1.19E-05          | 1.19E-05             | 0.194247           | -5.14809                     | T down vs N                            | 38.888  | 25.149    | 10.3473    | 1         |
| cg18400281  | KIAA1217;KIAA1217;KIAA1217         | 0.00102307        | 0.00102307           | 0.232296           | -4.30485                     | T down vs N                            | 16.033  | 19.9578   | 19.9165    | 1         |
| cg18401785  | SPATS2L;SPATS2L;SPATS2L;SPATS2L    | 9.81E-05          | 9.81E-05             | 0.199565           | -5.01089                     | T down vs N                            | 26.458  | 24.3267   | 14.7114    | 1         |
| cg18405140  | STK11                              | 0.00169976        | 0.00169976           | 0.235057           | -4.25429                     | T down vs N                            | 14.162  | 19.6361   | 22.1852    | 1         |
| cg18405691  | OR4C15                             | 0.0002414         | 0.000241395          | 0.163785           | -6.10555                     | T down vs N                            | 22.08   | 30.6573   | 22.2158    | 1         |
| cg18410078  | CTSW;CTSW                          | 0.00449705        | 0.00449705           | 0.262504           | -3.80947                     | T down vs N                            | 10.906  | 16.7549   | 24.582     | 1         |
| cg18411108  | ATXN7;ATXN7                        | 1.75E-05          | 1.75E-05             | 0.206118           | -4.85158                     | T down vs N                            | 36.365  | 23.3611   | 10.2785    | 1         |
| cg18411150  | SHANK1                             | 0.00079407        | 0.000794072          | 5.89834            | 5.89834                      | T up vs N                              | 17.015  | 29.4983   | 27.7395    | 1         |
| cg18412546  | GRTP1                              | 9.90E-07          | 9.90E-07             | 0.180675           | -5.5348                      | T down vs N                            | 58.485  | 27.4214   | 7.50184    | 1         |
| cg18412777  | MGC16121;MIR424;MIR503             | 0.00187036        | 0.00187036           | 5.26618            | 5.26618                      | T up vs N                              | 13.823  | 25.85     | 29.9218    | 1         |
| cg18413131  | NUDT16P;NUDT16P                    | 9.45E-05          | 9.45E-05             | 27.3845            | 27.3845                      | T up vs N                              | 26.646  | 102.615   | 61.6177    | 1         |
| cg18418051  | NPR3                               | 0.0001107         | 0.000110699          | 0.199651           | -5.00875                     | T down vs N                            | 25.839  | 24.3138   | 15.0557    | 1         |
| cg18418186  | CHRD                               | 0.00040018        | 0.00040018           | 4.96139            | 4.96139                      | T up vs N                              | 19.835  | 24.0279   | 19.3826    | 1         |
| cg18419977  | SLC22A18AS;SLC22A18                | 0.00085468        | 0.000854677          | 0.283053           | -3.53291                     | T down vs N                            | 16.726  | 14.9198   | 14.2719    | 1         |
| cg18420781  | TRIM10;TRIM10                      | 0.00015811        | 0.000158106          | 0.26779            | -3.73427                     | T down vs N                            | 24.074  | 16.2592   | 10.8063    | 1         |
| cg18421167  | EPX                                | 3.24E-05          | 3.24E-05             | 0.255079           | -3.92035                     | T down vs N                            | 32.563  | 17.4815   | 8.58962    | 1         |
| cg18421949  | MAP7                               | 0.00563264        | 0.00563264           | 3.05191            | 3.05191                      | T up vs N                              | 10.21   | 11.6603   | 18.2724    | 1         |
| cg18422268  | MEGF11                             | 0.00372029        | 0.00372029           | 4.56852            | 4.56852                      | T up vs N                              | 11.508  | 21.6165   | 30.0554    | 1         |
| cg18422371  | RAG1                               | 0.00016571        | 0.000165708          | 0.215628           | -4.63762                     | T down vs N                            | 23.847  | 22.0458   | 14.7915    | 1         |
| cg18424208  | CDX1                               | 0.00503976        | 0.00503976           | 3.35837            | 3.35837                      | T up vs N                              | 10.551  | 13.746    | 20.845     | 1         |
| cg18425434  | C10orf82                           | 0.00444579        | 0.00444579           | 8.47435            | 8.47435                      | T up vs N                              | 10.941  | 42.7748   | 62.551     | 1         |
| cg18426477  | ABCC3                              | 0.00010553        | 0.000105525          | 0.302291           | -3.30807                     | T down vs N                            | 26.082  | 13.4057   | 8.22373    | 1         |

| Probeset ID | UCSC_REFGENE_NAME                                                                       | p-value<br>(Type) | p-value (T vs.<br>N) | Ratio (T<br>vs. N) | Fold-<br>Change (T<br>vs. N) | Fold-Change (T vs.<br>N) (Description) | F(Type) | SS (Type) | SS (Error) | F (Error) |
|-------------|-----------------------------------------------------------------------------------------|-------------------|----------------------|--------------------|------------------------------|----------------------------------------|---------|-----------|------------|-----------|
| cg18426506  | FITM2                                                                                   | 0.00163641        | 0.00163641           | 0.317121           | -3.15337                     | T down vs N                            | 14.297  | 12.3539   | 13.825     | 1         |
| cg18428193  | KRTCAP3;NRBP1;KRTCAP3                                                                   | 6.56E-06          | 6.56E-06             | 4.82042            | 4.82042                      | T up vs N                              | 43.046  | 23.1708   | 8.61257    | 1         |
| cg18430152  | HOXA3                                                                                   | 0.00189844        | 0.00189844           | 5.35925            | 5.35925                      | T up vs N                              | 13.77   | 26.3981   | 30.6725    | 1         |
| cg18430208  | CA5B                                                                                    | 0.00058023        | 0.00058023           | 9.61792            | 9.61792                      | T up vs N                              | 20.393  | 39.8158   | 25.3818    | 1         |
| cg18431127  | EPB42;EPB42                                                                             | 2.05E-05          | 2.05E-05             | 0.2848             | -3.51123                     | T down vs N                            | 35.363  | 14.7747   | 6.68485    | 1         |
| cg18431655  | OR1S2                                                                                   | 0.00085376        | 0.000853759          | 0.314945           | -3.17516                     | T down vs N                            | 16.731  | 12.5024   | 11.9565    | 1         |
| cg18432414  | MFSD6L;MFSD6L                                                                           | 4.06E-05          | 4.06E-05             | 5.98285            | 5.98285                      | T up vs N                              | 31.251  | 29.9732   | 15.346     | 1         |
| cg18432471  | GPR78                                                                                   | 4.06E-05          | 4.06E-05             | 0.199462           | -5.01349                     | T down vs N                            | 31.253  | 24.3424   | 12.4621    | 1         |
| cg18433146  | CD36;CD36                                                                               | 0.00072404        | 0.00072404           | 0.326917           | -3.05888                     | T down vs N                            | 17.38   | 11.708    | 10.7783    | 1         |
| cg18434354  | LOC84931                                                                                | 1.79E-07          | 1.79E-07             | 0.319125           | -3.13357                     | T down vs N                            | 75.983  | 12.2187   | 2.57292    | 1         |
| cg18435000  | IQSEC3;IQSEC3                                                                           | 6.51E-05          | 6.51E-05             | 3.63987            | 3.63987                      | T up vs N                              | 28.616  | 15.6334   | 8.74092    | 1         |
| cg18438124  | RAP1GAP;RAP1GAP                                                                         | 0.00534597        | 0.00534597           | 3.04796            | 3.04796                      | T up vs N                              | 10.37   | 11.6332   | 17.9497    | 1         |
| cg18438300  | FZD9                                                                                    | 0.00011166        | 0.000111659          | 0.327572           | -3.05277                     | T down vs N                            | 25.795  | 11.6662   | 7.23621    | 1         |
| cg18438793  | HPCAL4                                                                                  | 7.06E-06          | 7.06E-06             | 23.3102            | 23.3102                      | T up vs N                              | 42.508  | 92.8702   | 34.9561    | 1         |
| cg18438823  | ORS1E1                                                                                  | 1.47E-05          | 1.47E-05             | 0.213922           | -4.67461                     | T down vs N                            | 37.471  | 22.2747   | 9.51124    | 1         |
| cg18438944  | MT1A                                                                                    | 6.26E-06          | 6.26E-06             | 41.0611            | 41.0611                      | T up vs N                              | 43.377  | 129.269   | 47.6819    | 1         |
| cg18439591  | CEP72                                                                                   | 5.83E-05          | 5.83E-05             | 0.297358           | -3.36295                     | T down vs N                            | 29.224  | 13.7769   | 7.54282    | 1         |
| cg18439833  | C1orf170                                                                                | 3.22E-05          | 3.22E-05             | 0.307811           | -3.24875                     | T down vs N                            | 32.605  | 13.0032   | 6.38103    | 1         |
| cg18440774  | YTHDC1;YTHDC1                                                                           | 0.00324117        | 0.00324117           | 0.324799           | -3.07883                     | T down vs N                            | 11.955  | 11.8445   | 15.8522    | 1         |
| cg18440824  | APOO;APOO                                                                               | 6.29E-06          | 6.29E-06             | 0.207487           | -4.81957                     | T down vs N                            | 43.349  | 23.1657   | 8.55037    | 1         |
| cg18441102  | FAM196A;DOCK1                                                                           | 0.00219742        | 0.00219742           | 0.320261           | -3.12245                     | T down vs N                            | 13.261  | 12.1428   | 14.6507    | 1         |
| cg18444689  | MAP3K13                                                                                 | 9.26E-05          | 9.26E-05             | 0.278001           | -3.59712                     | T down vs N                            | 26.754  | 15.3487   | 9.17906    | 1         |
| cg18448746  | PROCA1                                                                                  | 0.00014422        | 0.000144219          | 4.9344             | 4.9344                       | T up vs N                              | 24.521  | 23.8645   | 15.5715    | 1         |
| cg18449361  | MYLK4                                                                                   | 0.0001451         | 0.000145101          | 0.228458           | -4.37718                     | T down vs N                            | 24.492  | 20.4161   | 13.3376    | 1         |
| cg18449991  | PSG5;PSG5                                                                               | 5.06E-05          | 5.06E-05             | 0.257286           | -3.88672                     | T down vs N                            | 30.012  | 17.2617   | 9.20262    | 1         |
| cg18450254  | PRICKLE2                                                                                | 2.79E-06          | 2.79E-06             | 0.238977           | -4.1845                      | T down vs N                            | 49.573  | 19.19     | 6.19376    | 1         |
| cg18450420  | FAM107B                                                                                 | 0.00437252        | 0.00437252           | 0.303813           | -3.2915                      | T down vs N                            | 10.994  | 13.2934   | 19.347     | 1         |
| cg18450582  | DYNC1I1;DYNC1I1;DYNC1I1                                                                 | 0.00016214        | 0.000162142          | 0.05085            | -19.6657                     | T down vs N                            | 24.879  | 78.2235   | 47.1629    | 1         |
| cg18450930  | ORS1Q1                                                                                  | 0.00147959        | 0.00147959           | 0.232741           | -4.29662                     | T down vs N                            | 14.661  | 19.9056   | 21.7239    | 1         |
| cg18451344  | EIF2A                                                                                   | 3.98E-07          | 3.98E-07             | 0.207253           | -4.82503                     | T down vs N                            | 67.329  | 23.199    | 5.51296    | 1         |
| cg18452695  | ZNF560                                                                                  | 0.00039044        | 0.000390437          | 0.320073           | -3.12428                     | T down vs N                            | 19.941  | 12.1553   | 9.75312    | 1         |
| cg18453551  | LOC90246                                                                                | 0.00053239        | 0.00053239           | 0.237113           | -4.2174                      | T down vs N                            | 18.63   | 19.4006   | 16.6622    | 1         |
| cg18453969  | TPTE;TPTE;TPTE                                                                          | 0.00242536        | 0.00242536           | 0.332669           | -3.00599                     | T down vs N                            | 12.923  | 11.3455   | 14.0469    | 1         |
| cg18454299  | PATL2                                                                                   | 0.00040217        | 0.000402165          | 0.327469           | -3.05372                     | T down vs N                            | 19.813  | 11.6727   | 9.42613    | 1         |
| cg18457110  | KANK3                                                                                   | 0.00014374        | 0.000143736          | 0.218399           | -4.57878                     | T down vs N                            | 24.538  | 21.6804   | 14.1369    | 1         |
| cg18458558  | ZNF77                                                                                   | 8.36E-07          | 8.36E-07             | 0.31978            | -3.12715                     | T down vs N                            | 60.055  | 12.1749   | 3.24364    | 1         |
| cg18458730  | C20orf70                                                                                | 6.09E-05          | 6.09E-05             | 0.242245           | -4.12805                     | T down vs N                            | 28.979  | 18.8276   | 10.3953    | 1         |
| cg18459489  | VAX1                                                                                    | 0.00388682        | 0.00388682           | 0.333017           | -3.00285                     | T down vs N                            | 11.367  | 11.324    | 15.9393    | 1         |
| cg18459618  | RNF135;RNF135                                                                           | 0.00045035        | 0.000450345          | 7.38331            | 7.38331                      | T up vs N                              | 19.331  | 37.4355   | 30.9853    | 1         |
| cg18462521  | SERTAD2                                                                                 | 0.00144495        | 0.00144495           | 0.272061           | -3.67565                     | T down vs N                            | 14.747  | 15.871    | 17.2195    | 1         |
| cg18462653  | DEFB119;DEFB119;DEFB119                                                                 | 5.86E-05          | 5.86E-05             | 0.264537           | -3.78019                     | T down vs N                            | 29.191  | 16.5622   | 9.07803    | 1         |
| cg18463605  | CTPS2;CTPS2;CTPS2                                                                       | 0.00043774        | 0.000437739          | 0.266402           | -3.75373                     | T down vs N                            | 19.451  | 16.3877   | 13.4801    | 1         |
| cg18463686  | CLEC5A;CLEC5A                                                                           | 0.00070768        | 0.000707684          | 0.253178           | -3.94978                     | T down vs N                            | 17.471  | 17.6734   | 16.1852    | 1         |
| cg18467189  | RASAL3                                                                                  | 3.89E-05          | 3.89E-05             | 0.321998           | -3.10561                     | T down vs N                            | 31.502  | 12.0277   | 6.10883    | 1         |
| cg18474016  | SSX7                                                                                    | 0.00100508        | 0.00100508           | 0.208608           | -4.79367                     | T down vs N                            | 16.101  | 23.0072   | 22.8631    | 1         |
| cg18476530  | LOC100130987;CLCF1;CLCF1                                                                | 0.00082798        | 0.000827981          | 0.161899           | -6.1767                      | T down vs N                            | 16.85   | 31.0512   | 29.4843    | 1         |
| cg18477204  | C14orf162                                                                               | 0.00024079        | 0.000240788          | 0.068534           | -14.5913                     | T down vs N                            | 22.091  | 67.293    | 48.7384    | 1         |
| cg18480790  | FAM98C                                                                                  | 0.00021166        | 0.000211657          | 0.212323           | -4.70981                     | T down vs N                            | 22.688  | 22.492    | 15.862     | 1         |
| cg18481342  | HCCA2;CTSD                                                                              | 0.00573036        | 0.00573036           | 0.326564           | -3.06218                     | T down vs N                            | 10.158  | 11.7306   | 18.4772    | 1         |
| cg18482656  | OR2Y1                                                                                   | 5.35E-05          | 5.35E-05             | 0.091585           | -10.9188                     | T down vs N                            | 29.702  | 53.5223   | 28.8321    | 1         |
| cg18483289  | SCRT2                                                                                   | 1.61E-05          | 1.61E-05             | 3.64465            | 3.64465                      | T up vs N                              | 36.899  | 15.6651   | 6.79275    | 1         |
| cg18484300  | SUPT16H                                                                                 | 0.00051318        | 0.000513183          | 0.237189           | -4.21605                     | T down vs N                            | 18.782  | 19.392    | 16.5195    | 1         |
| cg18487516  | FAM50B                                                                                  | 0.00027648        | 0.000276481          | 3.05051            | 3.05051                      | T up vs N                              | 21.463  | 11.6507   | 8.68541    | 1         |
| cg18487916  | NEK4                                                                                    | 7.85E-05          | 7.85E-05             | 3.96767            | 3.96767                      | T up vs N                              | 27.617  | 17.7899   | 10.3066    | 1         |
| cg18489009  | OPA3;OPA3                                                                               | 0.00248141        | 0.00248141           | 3.34799            | 3.34799                      | T up vs N                              | 12.845  | 13.6758   | 17.0343    | 1         |
| cg18492126  | NCAM2                                                                                   | 0.00020868        | 0.000208682          | 6.58331            | 6.58331                      | T up vs N                              | 22.754  | 33.2637   | 23.3904    | 1         |
| cg18492943  | GCK                                                                                     | 2.75E-06          | 2.75E-06             | 0.26756            | -3.73748                     | T down vs N                            | 49.702  | 16.2803   | 5.24097    | 1         |
| cg18495484  | COL14A1                                                                                 | 2.03E-05          | 2.03E-05             | 0.061222           | -16.3341                     | T down vs N                            | 35.428  | 73.0773   | 33.0033    | 1         |
| cg18497508  | FOXP4;FOXP4;FOXP4                                                                       | 4.50E-05          | 4.50E-05             | 5.82863            | 5.82863                      | T up vs N                              | 30.669  | 29.1044   | 15.1839    | 1         |
| cg18499148  | ORS1F2                                                                                  | 0.00190145        | 0.00190145           | 0.332418           | -3.00826                     | T down vs N                            | 13.765  | 11.3612   | 13.2061    | 1         |
| cg18499443  | HPSE2;HPSE2;HPSE2;HPSE2                                                                 | 0.00560985        | 0.00560985           | 3.28674            | 3.28674                      | T up vs N                              | 10.223  | 13.2611   | 20.7559    | 1         |
| cg18499731  | SNORD109B;SNORD109A                                                                     | 0.00015164        | 0.000151644          | 0.290274           | -3.44502                     | T down vs N                            | 24.276  | 14.3301   | 9.44473    | 1         |
| cg18500968  | TMPPRSS3;TMPPRSS3                                                                       | 0.00642652        | 0.00642652           | 0.296047           | -3.37785                     | T down vs N                            | 9.8127  | 13.8775   | 22.6279    | 1         |
| cg18502829  | ACCN1                                                                                   | 0.0004225         | 0.000422504          | 0.276481           | -3.61688                     | T down vs N                            | 19.602  | 15.4804   | 12.6357    | 1         |
| cg18507379  | PCDHGA4;PCDHGA6;PCDHGA9;PCDHGA1;PCDHGA8;PCDHGA5;PCDHGB1;PCDHGB6;PCDHGB4;PCDHGA3;PCDHGA2 | 0.00368443        | 0.00368443           | 12.2407            | 12.2407                      | T up vs N                              | 11.539  | 58.7618   | 81.4812    | 1         |
|             | NAT1;NAT1;NAT1;NAT1;NAT1;NAT1;N                                                         |                   |                      |                    |                              |                                        |         |           |            |           |
|             | AT1;NAT1;NAT1                                                                           |                   |                      |                    |                              |                                        |         |           |            |           |
| cg18509990  | PAK3;PAK3;PAK3                                                                          | 0.00199538        | 0.00199538           | 0.223907           | -4.46614                     | T down vs N                            | 13.596  | 20.9763   | 24.6856    | 1         |
| cg18510064  | COL1A2                                                                                  | 0.00376068        | 0.00376068           | 4.66358            | 4.66358                      | T up vs N                              | 11.473  | 22.2065   | 30.9691    | 1         |
| cg18511007  |                                                                                         | 0.00592384        | 0.00592384           | 3.18336            | 3.18336                      | T up vs N                              | 10.057  | 12.5583   | 19.9787    | 1         |

| Probeset ID | UCSC_REFGENE_NAME                                                | p-value<br>(Type) | p-value (T vs.<br>N) | Ratio (T<br>vs. N) | Fold-<br>Change (T<br>vs. N) | Fold-Change (T vs.<br>N) (Description) | F(Type) | SS (Type) | SS (Error) | F (Error) |
|-------------|------------------------------------------------------------------|-------------------|----------------------|--------------------|------------------------------|----------------------------------------|---------|-----------|------------|-----------|
| cg18511008  | CAPSL;CAPSL                                                      | 1.04E-05          | 1.04E-05             | 0.23257            | -4.29978                     | T down vs N                            | 39.773  | 19.9256   | 8.01567    | 1         |
| cg18512262  | OR56A1                                                           | 0.00096812        | 0.000968121          | 0.30611            | -3.2668                      | T down vs N                            | 16.244  | 13.1258   | 12.9285    | 1         |
| cg18513357  | TRPC7;TRPC7;TRPC7                                                | 1.09E-06          | 1.09E-06             | 0.156286           | -6.39852                     | T down vs N                            | 57.586  | 32.2662   | 8.96501    | 1         |
| cg18514922  | LY75                                                             | 0.00212697        | 0.00212697           | 10.716             | 10.716                       | T up vs N                              | 13.711  | 49.5869   | 54.2505    | 1         |
| cg18515510  | CLEC4M;CLEC4M;CLEC4M;CLEC4M;CL<br>EC4M;CLEC4M;CLEC4M;CLEC4M;CLEC | 1.75E-05          | 1.75E-05             | 0.174516           | -5.73013                     | T down vs N                            | 36.344  | 28.5443   | 12.5664    | 1         |
| cg18515591  | BTG4;MIR34C;MIR34B                                               | 0.00175083        | 0.00175083           | 5.28024            | 5.28024                      | T up vs N                              | 14.056  | 25.9331   | 29.5191    | 1         |
| cg18516854  | ZDHHC14;ZDHHC14                                                  | 0.00013055        | 0.000130554          | 0.317604           | -3.14857                     | T down vs N                            | 25.012  | 12.3211   | 7.88176    | 1         |
| cg18520925  | C6orf222                                                         | 0.00044342        | 0.000443418          | 0.324533           | -3.08135                     | T down vs N                            | 19.396  | 11.8618   | 9.78473    | 1         |
| cg18521743  | ZBTB45                                                           | 5.64E-05          | 5.64E-05             | 11.3708            | 11.3708                      | T up vs N                              | 29.404  | 55.3542   | 30.1202    | 1         |
| cg18526142  | OXCT1                                                            | 0.00010919        | 0.000109187          | 0.230495           | -4.33848                     | T down vs N                            | 25.908  | 20.1712   | 12.4569    | 1         |
| cg18527574  | EPHA4                                                            | 3.55E-05          | 3.55E-05             | 8.84349            | 8.84349                      | T up vs N                              | 32.038  | 44.4987   | 22.2232    | 1         |
| cg18529079  | SAR1B;SAR1B                                                      | 7.64E-06          | 7.64E-06             | 0.257821           | -3.87866                     | T down vs N                            | 41.948  | 17.2089   | 6.56397    | 1         |
| cg18529892  | ABCA7                                                            | 0.00018184        | 0.000181842          | 0.235059           | -4.25426                     | T down vs N                            | 23.403  | 19.6359   | 13.4247    | 1         |
| cg18531146  | TEAD1                                                            | 5.83E-06          | 5.83E-06             | 0.124104           | -8.05777                     | T down vs N                            | 43.9    | 40.7808   | 14.8631    | 1         |
| cg18532308  | MYO1F                                                            | 6.60E-08          | 6.60E-08             | 0.177194           | -5.64354                     | T down vs N                            | 88.069  | 28.0485   | 5.09572    | 1         |
| cg18533313  | EBAG9;EBAG9                                                      | 2.29E-05          | 2.29E-05             | 0.15571            | -6.42221                     | T down vs N                            | 34.684  | 32.3949   | 14.944     | 1         |
| cg18536123  | SEBOX;SEBOX;VTN                                                  | 0.00140794        | 0.00140794           | 0.056722           | -17.6297                     | T down vs N                            | 14.842  | 77.1259   | 83.1456    | 1         |
| cg18540249  | DLGAP2                                                           | 0.00066279        | 0.000662785          | 0.16932            | -5.90598                     | T down vs N                            | 17.734  | 29.5414   | 26.6525    | 1         |
| cg18543991  | PLOD2;PLOD2                                                      | 7.19E-06          | 7.19E-06             | 0.272253           | -3.67306                     | T down vs N                            | 42.379  | 15.8538   | 5.98558    | 1         |
| cg18544564  | COL3A1;COL3A1                                                    | 0.00017591        | 0.000175913          | 0.28972            | -3.45161                     | T down vs N                            | 23.561  | 14.3745   | 9.76172    | 1         |
| cg18545596  | GRAP2                                                            | 3.23E-05          | 3.23E-05             | 0.305586           | -3.2724                      | T down vs N                            | 32.584  | 13.1638   | 6.46399    | 1         |
| cg18545695  | C8orf34                                                          | 0.00067381        | 0.000673807          | 0.247913           | -4.03368                     | T down vs N                            | 17.668  | 18.2184   | 16.4986    | 1         |
| cg18546037  | HCLS1                                                            | 0.00018837        | 0.000188365          | 0.178786           | -5.59327                     | T down vs N                            | 23.236  | 27.7592   | 19.1151    | 1         |
| cg18547284  | PIP                                                              | 4.30E-06          | 4.30E-06             | 0.185049           | -5.40397                     | T down vs N                            | 46.174  | 26.66     | 9.23821    | 1         |
| cg18548864  | BOC                                                              | 0.00018083        | 0.000180831          | 0.162551           | -6.15192                     | T down vs N                            | 23.429  | 30.9143   | 21.1116    | 1         |
| cg18555073  | B2M                                                              | 2.93E-05          | 2.93E-05             | 0.22603            | -4.4242                      | T down vs N                            | 33.163  | 20.7126   | 9.99326    | 1         |
| cg18555698  | TEAD1                                                            | 0.00041059        | 0.000410591          | 0.321825           | -3.10728                     | T down vs N                            | 19.724  | 12.0391   | 9.76586    | 1         |
| cg18559739  | CDYL                                                             | 2.04E-05          | 2.04E-05             | 13.8144            | 13.8144                      | T up vs N                              | 35.378  | 64.5738   | 29.2042    | 1         |
| cg18561247  | RPS6KA2                                                          | 0.00075612        | 0.000756115          | 0.258158           | -3.87359                     | T down vs N                            | 17.208  | 17.1758   | 15.9701    | 1         |
| cg18561589  | EMX2OS                                                           | 0.00040024        | 0.000400238          | 0.151921           | -6.58238                     | T down vs N                            | 19.834  | 33.2588   | 26.8297    | 1         |
| cg18562243  | SOX2OT                                                           | 5.64E-05          | 5.64E-05             | 6.24932            | 6.24932                      | T up vs N                              | 29.408  | 31.4511   | 17.1116    | 1         |
| cg18562714  | C21orf49;C21orf62;C21orf62;C21orf4                               | 0.00233891        | 0.00233891           | 0.200179           | -4.99553                     | T down vs N                            | 13.047  | 24.2341   | 29.7194    | 1         |
| cg18563630  | PCP2                                                             | 4.84E-05          | 4.84E-05             | 0.153486           | -6.51526                     | T down vs N                            | 30.26   | 32.898    | 17.3947    | 1         |
| cg18565216  | C2CD2;C2CD2                                                      | 1.88E-05          | 1.88E-05             | 0.317409           | -3.15051                     | T down vs N                            | 35.9    | 12.3343   | 5.49713    | 1         |
| cg18565355  | ESRP1;ESRP1;ESRP1;ESRP1;ESRP1                                    | 5.76E-05          | 5.76E-05             | 3.48974            | 3.48974                      | T up vs N                              | 29.293  | 14.6306   | 7.99139    | 1         |
| cg18569734  | NR2E1                                                            | 0.00203812        | 0.00203812           | 0.239496           | -4.17543                     | T down vs N                            | 13.522  | 19.1319   | 22.6381    | 1         |
| cg18570392  | PRDM14                                                           | 0.00079528        | 0.000795275          | 0.314786           | -3.17676                     | T down vs N                            | 17.009  | 12.5134   | 11.7714    | 1         |
| cg18570553  | PRR15                                                            | 5.97E-05          | 5.97E-05             | 11.6479            | 11.6479                      | T up vs N                              | 29.095  | 56.4557   | 31.0466    | 1         |
| cg18570800  | ZMYND11;ZMYND11;ZMYND11                                          | 2.20E-05          | 2.20E-05             | 0.329386           | -3.03595                     | T down vs N                            | 34.925  | 11.551    | 5.29172    | 1         |
| cg18571935  | MICB                                                             | 0.00021648        | 0.000216479          | 0.308962           | -3.23664                     | T down vs N                            | 22.583  | 12.9209   | 9.15455    | 1         |
| cg18572653  | NODAL                                                            | 4.25E-06          | 4.25E-06             | 5.53362            | 5.53362                      | T up vs N                              | 46.273  | 27.4146   | 9.47932    | 1         |
| cg18575532  | PPP1R1B;PPP1R1B                                                  | 0.00554531        | 0.00554531           | 0.296011           | -3.37825                     | T down vs N                            | 10.258  | 13.8803   | 21.6504    | 1         |
| cg18575863  | ARMC2                                                            | 0.00342079        | 0.00342079           | 0.183211           | -5.45819                     | T down vs N                            | 11.779  | 26.9765   | 36.6436    | 1         |
| cg18578954  | TRIM27                                                           | 0.00014086        | 0.000140857          | 0.297222           | -3.36449                     | T down vs N                            | 24.637  | 13.7874   | 8.95394    | 1         |
| cg18584440  | BTNL2                                                            | 0.0043113         | 0.0043113            | 0.320936           | -3.11589                     | T down vs N                            | 11.038  | 12.098    | 17.5363    | 1         |
| cg18587476  | C2orf84                                                          | 0.00035124        | 0.000351244          | 3.09105            | 3.09105                      | T up vs N                              | 20.4    | 11.9282   | 9.35538    | 1         |
| cg18589526  | KIAA1549;KIAA1549                                                | 1.28E-05          | 1.28E-05             | 0.15058            | -6.64097                     | T down vs N                            | 38.385  | 33.5723   | 13.9939    | 1         |
| cg18590565  | TPRG1L                                                           | 0.00054046        | 0.000540458          | 0.245949           | -4.06589                     | T down vs N                            | 18.567  | 18.4268   | 15.8789    | 1         |
| cg18592459  | GREM2                                                            | 6.84E-06          | 6.84E-06             | 0.249247           | -4.01208                     | T down vs N                            | 42.735  | 18.0784   | 6.76851    | 1         |
| cg18593945  | KRTAP20-3                                                        | 2.37E-05          | 2.37E-05             | 0.214666           | -4.6584                      | T down vs N                            | 34.47   | 22.1745   | 10.2927    | 1         |
| cg18594332  | MYO1H                                                            | 0.00349236        | 0.00349236           | 0.255319           | -3.91667                     | T down vs N                            | 11.712  | 17.4575   | 23.8496    | 1         |
| cg18594389  | DOK3;DOK3                                                        | 0.000165          | 0.000165003          | 0.316282           | -3.16174                     | T down vs N                            | 23.868  | 12.4109   | 8.31985    | 1         |
| cg18594701  | OR4A16                                                           | 5.67E-06          | 5.67E-06             | 0.257803           | -3.87893                     | T down vs N                            | 44.101  | 17.2107   | 6.24407    | 1         |
| cg18594963  | MYO1C;MYO1C;MYO1C                                                | 1.08E-06          | 1.08E-06             | 4.58868            | 4.58868                      | T up vs N                              | 57.703  | 21.742    | 6.02869    | 1         |
| cg18595258  | TMEM138;CYBASC3;CYBASC3;TMEM1                                    | 0.00132536        | 0.00132536           | 0.326777           | -3.06019                     | T down vs N                            | 15.063  | 11.717    | 12.4455    | 1         |
| cg18596636  | GABRB3;GABRB3                                                    | 0.0004498         | 0.000449802          | 3.16622            | 3.16622                      | T up vs N                              | 19.336  | 12.4415   | 10.2951    | 1         |
| cg18597411  | CUL1                                                             | 6.74E-05          | 6.74E-05             | 0.33199            | -3.01214                     | T down vs N                            | 28.434  | 11.3877   | 6.40805    | 1         |
| cg18597415  | CLC                                                              | 0.00019726        | 0.000197258          | 0.287834           | -3.47423                     | T down vs N                            | 23.018  | 14.5265   | 10.0976    | 1         |
| cg18598117  | ARID3A                                                           | 0.0057926         | 0.0057926            | 0.166826           | -5.99427                     | T down vs N                            | 10.125  | 30.0371   | 47.4652    | 1         |
| cg18599206  | HLA-A                                                            | 0.00105973        | 0.00105973           | 0.331285           | -3.01855                     | T down vs N                            | 15.899  | 11.4317   | 11.504     | 1         |
| cg18601578  | ZSCAN4                                                           | 1.16E-05          | 1.16E-05             | 0.135576           | -7.37595                     | T down vs N                            | 39.038  | 37.3982   | 15.328     | 1         |
| cg18606098  | NHEDC2                                                           | 0.00012763        | 0.000127626          | 0.257156           | -3.88869                     | T down vs N                            | 25.125  | 17.2746   | 11.0009    | 1         |
| cg18609044  | ELOVL7;ELOVL7                                                    | 0.00105614        | 0.00105614           | 0.302652           | -3.30413                     | T down vs N                            | 15.912  | 13.379    | 13.4527    | 1         |
| cg18614779  | SIGLEC6;SIGLEC6;SIGLEC6                                          | 9.00E-05          | 9.00E-05             | 0.213101           | -4.69262                     | T down vs N                            | 26.898  | 22.3859   | 13.3159    | 1         |
| cg18615402  | PCDH24                                                           | 0.00036249        | 0.000362488          | 0.182895           | -5.46762                     | T down vs N                            | 20.263  | 27.0314   | 21.3448    | 1         |
| cg18617708  | SERPINA7                                                         | 3.07E-06          | 3.07E-06             | 0.159287           | -6.27799                     | T down vs N                            | 48.799  | 31.6085   | 10.3638    | 1         |
| cg18618429  | CSTA                                                             | 1.43E-06          | 1.43E-06             | 0.193548           | -5.16668                     | T down vs N                            | 55.17   | 25.2598   | 7.32569    | 1         |

| Probeset ID                     | UCSC_REFGENE_NAME           | p-value<br>(Type) | p-value (T vs.<br>N) | Ratio (T<br>vs. N) | Fold-<br>Change (T<br>vs. N) | Fold-Change (T vs.<br>N) (Description) | F(Type) | SS (Type) | SS (Error) | F (Error) |
|---------------------------------|-----------------------------|-------------------|----------------------|--------------------|------------------------------|----------------------------------------|---------|-----------|------------|-----------|
| cg18620571                      | TNFAIP2                     | 0.00400131        | 0.00400131           | 4.12837            | 4.12837                      | T up vs N                              | 11.275  | 18.8296   | 26.7217    | 1         |
| cg18625951                      | CNTNAP2                     | 0.0072911         | 0.0072911            | 0.259093           | -3.85962                     | T down vs N                            | 9.4389  | 17.0842   | 28.9599    | 1         |
| cg18626958                      | RP1L1                       | 0.00096179        | 0.000961793          | 0.18943            | -5.27898                     | T down vs N                            | 16.269  | 25.9256   | 25.4963    | 1         |
| cg18627429                      | DLK1                        | 0.00019133        | 0.000191333          | 0.163012           | -6.13453                     | T down vs N                            | 23.162  | 30.818    | 21.2891    | 1         |
| cg18630178                      | RIN3                        | 0.00010991        | 0.000109909          | 5.77206            | 5.77206                      | T up vs N                              | 25.875  | 28.7832   | 17.7983    | 1         |
| cg18631330                      | MYADML2                     | 0.0008441         | 0.000844103          | 4.46783            | 4.46783                      | T up vs N                              | 16.775  | 20.9869   | 20.0174    | 1         |
| cg18634506                      | BUD31;PDAP1                 | 0.00103641        | 0.00103641           | 0.220721           | -4.53061                     | T down vs N                            | 15.984  | 21.38     | 21.4016    | 1         |
| cg18635207                      | TMEM90A                     | 0.00013235        | 0.000132348          | 0.264358           | -3.78275                     | T down vs N                            | 24.944  | 16.579    | 10.6343    | 1         |
| cg18640606                      | PRODH2                      | 0.00417572        | 0.00417572           | 0.293184           | -3.41083                     | T down vs N                            | 11.139  | 14.1      | 20.253     | 1         |
| cg18642503                      | RFX1                        | 0.00558425        | 0.00558425           | 5.16416            | 5.16416                      | T up vs N                              | 10.236  | 25.2448   | 39.4588    | 1         |
| cg18645398                      | NUS1                        | 6.11E-05          | 6.11E-05             | 0.224062           | -4.46304                     | T down vs N                            | 28.968  | 20.9569   | 11.5753    | 1         |
| cg18645493                      | MIR190B                     | 4.02E-07          | 4.02E-07             | 0.123003           | -8.12987                     | T down vs N                            | 67.24   | 41.1297   | 9.78697    | 1         |
| cg18646365                      | CRABP1                      | 0.00129272        | 0.00129272           | 3.54209            | 3.54209                      | T up vs N                              | 15.155  | 14.9813   | 15.8162    | 1         |
| cg18646828                      | SNORD114-31                 | 0.00191456        | 0.00191456           | 0.290947           | -3.43705                     | T down vs N                            | 13.741  | 14.2765   | 16.6241    | 1         |
| cg18648982                      | FANCM                       | 0.00030124        | 0.000301244          | 0.18627            | -5.36855                     | T down vs N                            | 21.078  | 26.4526   | 20.0797    | 1         |
| FAM172A;FAM172A;FAM172A;FAM17   |                             |                   |                      |                    |                              |                                        |         |           |            |           |
| cg18649133                      | 2A                          | 0.00086108        | 0.000861083          | 0.259297           | -3.85659                     | T down vs N                            | 16.697  | 17.0643   | 16.3518    | 1         |
| cg18649632                      | PROCR                       | 0.00078671        | 0.000786713          | 0.199459           | -5.01355                     | T down vs N                            | 17.051  | 24.3427   | 22.8421    | 1         |
| cg18650716                      | FLOT1;IER3                  | 0.0008474         | 0.000847403          | 9.45203            | 9.45203                      | T up vs N                              | 16.76   | 47.2574   | 45.1154    | 1         |
| BAGE;BAGE5;BAGE3;BAGE2;BAGE;BA  |                             |                   |                      |                    |                              |                                        |         |           |            |           |
| cg18652248                      | GE2;BAGE4;BAGE4;BAGE3;BAGES | 0.00022158        | 0.000221583          | 0.287744           | -3.47531                     | T down vs N                            | 22.475  | 14.5337   | 10.3468    | 1         |
| cg18653560                      | MCF2L;MCF2L                 | 0.0044299         | 0.0044299            | 3.60974            | 3.60974                      | T up vs N                              | 10.953  | 15.4328   | 22.5447    | 1         |
| cg18657700                      | AGT                         | 4.58E-06          | 4.58E-06             | 0.177524           | -5.63303                     | T down vs N                            | 45.701  | 27.9881   | 9.79877    | 1         |
| cg18658151                      | TBC1D16                     | 0.00097611        | 0.000976114          | 0.303601           | -3.2938                      | T down vs N                            | 16.213  | 13.309    | 13.1344    | 1         |
| cg18659109                      | CDS1                        | 0.00295926        | 0.00295926           | 0.298876           | -3.34587                     | T down vs N                            | 12.255  | 13.6615   | 17.8366    | 1         |
| cg18660409                      | ATP2B2;ATP2B2               | 7.49E-05          | 7.49E-05             | 0.214926           | -4.65277                     | T down vs N                            | 27.866  | 22.1396   | 12.7123    | 1         |
| cg18663063                      | MARVELD2;MARVELD2           | 2.57E-05          | 2.57E-05             | 10.5796            | 10.5796                      | T up vs N                              | 33.972  | 52.1183   | 24.5462    | 1         |
| cg18664965                      | CHST13                      | 0.0004416         | 0.000441604          | 0.260174           | -3.84358                     | T down vs N                            | 19.414  | 16.979    | 13.9934    | 1         |
| cg18667659                      | C2orf55                     | 2.09E-05          | 2.09E-05             | 4.96493            | 4.96493                      | T up vs N                              | 35.237  | 24.0493   | 10.9201    | 1         |
| cg18668540                      | C10orf105;C10orf105;CDH23   | 0.00117846        | 0.00117846           | 0.309331           | -3.23279                     | T down vs N                            | 15.499  | 12.8947   | 13.3112    | 1         |
| cg18669388                      | SLIT3                       | 9.38E-06          | 9.38E-06             | 0.292472           | -3.41913                     | T down vs N                            | 40.512  | 14.1559   | 5.59083    | 1         |
| cg18670770                      | C4orf31                     | 3.07E-06          | 3.07E-06             | 0.135157           | -7.39882                     | T down vs N                            | 48.798  | 37.5141   | 12.3003    | 1         |
| cg18672389                      | FAM101A                     | 4.76E-05          | 4.76E-05             | 0.216078           | -4.62795                     | T down vs N                            | 30.354  | 21.9859   | 11.5893    | 1         |
| cg18675097                      | NKAPL;NKAPL                 | 0.00170128        | 0.00170128           | 5.06424            | 5.06424                      | T up vs N                              | 14.158  | 24.6475   | 27.8534    | 1         |
| cg18675902                      | MIR135A1                    | 0.00082969        | 0.000829692          | 0.273992           | -3.64974                     | T down vs N                            | 16.842  | 15.699    | 14.9139    | 1         |
| cg18676237                      | SERPINB9                    | 9.06E-06          | 9.06E-06             | 19.726             | 19.726                       | T up vs N                              | 40.753  | 83.2835   | 32.6981    | 1         |
| cg18678316                      | C17orf65                    | 0.00073251        | 0.000732506          | 0.303977           | -3.28973                     | T down vs N                            | 17.334  | 13.2814   | 12.2594    | 1         |
| cg18678645                      | MIR886                      | 0.00074994        | 0.000749938          | 3.82168            | 3.82168                      | T up vs N                              | 17.24   | 16.8352   | 15.6239    | 1         |
| cg18679324                      | COX7C                       | 0.00321734        | 0.00321734           | 0.306494           | -3.26271                     | T down vs N                            | 11.979  | 13.098    | 17.4945    | 1         |
| cg18680035                      | VAV1                        | 0.00048024        | 0.000480241          | 0.228211           | -4.38191                     | T down vs N                            | 19.06   | 20.446    | 17.1638    | 1         |
| cg18680977                      | HOXA3;HOXA3;HOXA3           | 0.0006093         | 0.000609297          | 6.17356            | 6.17356                      | T up vs N                              | 18.075  | 31.0339   | 27.471     | 1         |
| cg18681464                      | GAL3ST4                     | 0.00202335        | 0.00202335           | 0.302715           | -3.30344                     | T down vs N                            | 13.547  | 13.3743   | 15.7958    | 1         |
| cg18682921                      | SLC35B3;SLC35B3;SLC35B3     | 0.00046541        | 0.000465407          | 0.307468           | -3.25237                     | T down vs N                            | 19.192  | 13.0278   | 10.8612    | 1         |
| cg18685455                      | AHI1;AHI1;AHI1;AHI1         | 0.00054216        | 0.00054216           | 0.32411            | -3.08537                     | T down vs N                            | 18.554  | 11.8893   | 10.2526    | 1         |
| cg18686270                      | PLSCR1                      | 0.00023183        | 0.000231827          | 0.320017           | -3.12483                     | T down vs N                            | 22.266  | 12.159    | 8.73746    | 1         |
| RAB34;RAB34;RAB34;RAB34;RAB34;R |                             |                   |                      |                    |                              |                                        |         |           |            |           |
| cg18686527                      | AB34;RAB34;RAB34;RAB34      | 0.00556089        | 0.00556089           | 19.7718            | 19.7718                      | T up vs N                              | 10.249  | 83.413    | 130.216    | 1         |
| cg18688293                      | NMBR                        | 0.00012987        | 0.000129867          | 3.32795            | 3.32795                      | T up vs N                              | 25.038  | 13.5403   | 8.6526     | 1         |
| cg18694780                      | CXCR7                       | 6.38E-05          | 6.38E-05             | 3.98985            | 3.98985                      | T up vs N                              | 28.726  | 17.9341   | 9.98897    | 1         |
| cg18695543                      | CLYBL                       | 0.00053156        | 0.000531556          | 0.23411            | -4.27149                     | T down vs N                            | 18.636  | 19.7457   | 16.9527    | 1         |
| APOBEC3H;APOBEC3H;APOBEC3H;AP   |                             |                   |                      |                    |                              |                                        |         |           |            |           |
| cg18696237                      | OBEC3H                      | 0.00011209        | 0.000112088          | 0.303323           | -3.29681                     | T down vs N                            | 25.776  | 13.3294   | 8.2741     | 1         |
| cg18696495                      | CLYBL                       | 3.27E-05          | 3.27E-05             | 0.327761           | -3.051                       | T down vs N                            | 32.512  | 11.6541   | 5.73524    | 1         |
| HMG1;HMG1;HMG1;HMG1;HMG1        |                             |                   |                      |                    |                              |                                        |         |           |            |           |
| cg18696576                      | GA1                         | 0.00302169        | 0.00302169           | 3.25411            | 3.25411                      | T up vs N                              | 12.186  | 13.0396   | 17.1213    | 1         |
| cg18697089                      | LOC285501                   | 5.84E-05          | 5.84E-05             | 0.176413           | -5.66852                     | T down vs N                            | 29.21   | 28.1919   | 15.4425    | 1         |
| cg18697991                      | MIR548A2                    | 0.00208117        | 0.00208117           | 0.310856           | -3.21692                     | T down vs N                            | 13.449  | 12.7868   | 15.2119    | 1         |
| cg18698681                      | LOC154449                   | 0.00020503        | 0.000205029          | 0.299617           | -3.3376                      | T down vs N                            | 22.836  | 13.6056   | 9.53258    | 1         |
| cg18700133                      | ALOXE3;ALOXE3               | 2.59E-05          | 2.59E-05             | 14.2851            | 14.2851                      | T up vs N                              | 33.921  | 66.2323   | 31.2412    | 1         |
| cg18700197                      | ZC3H12B                     | 7.38E-05          | 7.38E-05             | 0.277705           | -3.60095                     | T down vs N                            | 27.944  | 15.3742   | 8.80298    | 1         |
| cg18701449                      | TPH2                        | 0.00073101        | 0.000731007          | 0.327547           | -3.05299                     | T down vs N                            | 17.342  | 11.6677   | 10.7648    | 1         |
| cg18702197                      | HOXD3                       | 3.05E-05          | 3.05E-05             | 7.22729            | 7.22729                      | T up vs N                              | 32.936  | 36.6399   | 17.7994    | 1         |
| cg18702576                      | MIR659                      | 0.00024202        | 0.000242023          | 0.264775           | -3.77679                     | T down vs N                            | 22.068  | 16.5397   | 11.992     | 1         |
| cg18703117                      | JAKMIP3                     | 0.00026433        | 0.000264325          | 0.27195            | -3.67715                     | T down vs N                            | 21.666  | 15.8809   | 11.7279    | 1         |
| cg18703238                      | TNFSF13B;TNFSF13B           | 0.00046489        | 0.000464886          | 0.212374           | -4.70868                     | T down vs N                            | 19.196  | 22.485    | 18.741     | 1         |
| cg18704047                      | PART1;PART1;PDE4D;PART1     | 0.00035356        | 0.000353558          | 0.317501           | -3.1496                      | T down vs N                            | 20.371  | 12.3281   | 9.6827     | 1         |
| PCDHGA4;PCDHGA1;PCDHGA6;PCDHG   |                             |                   |                      |                    |                              |                                        |         |           |            |           |
| A5;PCDHGB1;PCDHGA3;PCDHGA6;PC   |                             |                   |                      |                    |                              |                                        |         |           |            |           |
| cg18705909                      | DHGA2;PCDHGB2;PCDHGB3       | 0.00056365        | 0.00056365           | 5.02368            | 5.02368                      | T up vs N                              | 18.394  | 24.4037   | 21.2276    | 1         |
| cg18707845                      | ARHGAP11A;ARHGAP11A         | 6.89E-05          | 6.89E-05             | 0.113096           | -8.84207                     | T down vs N                            | 28.316  | 44.4922   | 25.1407    | 1         |



| Probeset ID                    | UCSC_REFGENE_NAME             | p-value<br>(Type) | p-value (T vs.<br>N) | Ratio (T<br>vs. N) | Fold-<br>Change (T<br>vs. N) | Fold-Change (T vs.<br>N) (Description) | F(Type) | SS (Type) | SS (Error) | F (Error) |
|--------------------------------|-------------------------------|-------------------|----------------------|--------------------|------------------------------|----------------------------------------|---------|-----------|------------|-----------|
| cg18825594                     | KLF11                         | 0.00708597        | 0.00708597           | 3.1627             | 3.1627                       | T up vs N                              | 9.5228  | 12.4175   | 20.8635    | 1         |
| cg18827893                     | DCAF8L2;DCAF8L2               | 0.00487976        | 0.00487976           | 0.300355           | -3.3294                      | T down vs N                            | 10.651  | 13.5501   | 20.3554    | 1         |
| cg18832619                     | NCR1;NCR1;NCR1;NCR1;NCR1      | 0.00142582        | 0.00142582           | 0.293316           | -3.4093                      | T down vs N                            | 14.796  | 14.0897   | 15.2367    | 1         |
| cg18839416                     | C1orf158                      | 0.00067051        | 0.000670514          | 0.316697           | -3.15759                     | T down vs N                            | 17.688  | 12.3827   | 11.2012    | 1         |
| cg18843856                     | GLI2                          | 0.00112703        | 0.00112703           | 0.270954           | -3.69067                     | T down vs N                            | 15.667  | 15.9705   | 16.3102    | 1         |
| cg18844118                     | NFE2L3                        | 0.00122882        | 0.00122882           | 0.313459           | -3.19021                     | T down vs N                            | 15.343  | 12.605    | 13.1444    | 1         |
| cg18845277                     | HUS1                          | 0.00067891        | 0.000678913          | 0.318761           | -3.13714                     | T down vs N                            | 17.638  | 12.2431   | 11.1064    | 1         |
| cg18845298                     | PTPRZ1                        | 0.00147865        | 0.00147865           | 0.298864           | -3.34601                     | T down vs N                            | 14.663  | 13.6624   | 14.9081    | 1         |
| cg18845718                     | ESD                           | 0.00062945        | 0.000629445          | 0.239372           | -4.1776                      | T down vs N                            | 17.943  | 19.1458   | 17.0726    | 1         |
| cg18847227                     | SUMF1;SUMF1;SUMF1             | 1.65E-06          | 1.65E-06             | 0.269624           | -3.70887                     | T down vs N                            | 53.95   | 16.0911   | 4.77218    | 1         |
| cg18848287                     | LOC389458                     | 0.00275129        | 0.00275129           | 0.300131           | -3.33188                     | T down vs N                            | 12.498  | 13.5669   | 17.3691    | 1         |
| RNASE9;RNASE9;RNASE9;RNASE9;RN |                               |                   |                      |                    |                              |                                        |         |           |            |           |
| cg18848446                     | ASE9;RNASE9;RNASE9            | 5.34E-06          | 5.34E-06             | 0.192783           | -5.18719                     | T down vs N                            | 44.555  | 25.3818   | 9.11488    | 1         |
| cg18849279                     | CDH4                          | 0.00258075        | 0.00258075           | 0.320787           | -3.11733                     | T down vs N                            | 12.713  | 12.1078   | 15.2388    | 1         |
| cg18849517                     | CD27;LOC678655                | 0.00130104        | 0.00130104           | 0.326545           | -3.06236                     | T down vs N                            | 15.132  | 11.7319   | 12.4051    | 1         |
| cg18849847                     | PTPRN2;PTPRN2;PTPRN2          | 0.00044167        | 0.000441666          | 0.320315           | -3.12192                     | T down vs N                            | 19.413  | 12.1392   | 10.0049    | 1         |
| cg18851100                     | SHANK3                        | 3.69E-05          | 3.69E-05             | 7.45977            | 7.45977                      | T up vs N                              | 31.81   | 37.8223   | 19.0243    | 1         |
| cg18852630                     | HAPLN1                        | 1.24E-07          | 1.24E-07             | 0.127771           | -7.82648                     | T down vs N                            | 80.22   | 39.6503   | 7.90833    | 1         |
| cg18853199                     | 9-Sep                         | 0.00012003        | 0.000120026          | 4.55665            | 4.55665                      | T up vs N                              | 25.431  | 21.5426   | 13.5535    | 1         |
| cg18854666                     | SLC11A1;SLC11A1               | 1.33E-05          | 1.33E-05             | 0.317084           | -3.15374                     | T down vs N                            | 38.144  | 12.3563   | 5.18302    | 1         |
| cg18854765                     | LRRIQ3;TNNT3K;FPGT            | 8.26E-05          | 8.26E-05             | 0.201248           | -4.96899                     | T down vs N                            | 27.352  | 24.0739   | 14.0827    | 1         |
| cg18857759                     | OR2L8;OR2L13                  | 0.00115617        | 0.00115617           | 0.255719           | -3.91054                     | T down vs N                            | 15.571  | 17.4174   | 17.8973    | 1         |
| cg18859776                     | SPAG16;VWC2L                  | 9.73E-05          | 9.73E-05             | 0.314067           | -3.18403                     | T down vs N                            | 26.499  | 12.5629   | 7.58535    | 1         |
| cg18861551                     | RIMBP2                        | 0.00010869        | 0.000108689          | 0.271454           | -3.68387                     | T down vs N                            | 25.932  | 15.9255   | 9.82613    | 1         |
| cg18861753                     | COL23A1                       | 0.00143144        | 0.00143144           | 0.274402           | -3.64428                     | T down vs N                            | 14.781  | 15.6627   | 16.9542    | 1         |
| cg18862481                     | TRH;TRH                       | 2.46E-05          | 2.46E-05             | 18.2663            | 18.2663                      | T up vs N                              | 34.218  | 79.0444   | 36.9603    | 1         |
| cg18865075                     | LEUTX                         | 0.00022552        | 0.000225524          | 0.134722           | -7.42268                     | T down vs N                            | 22.393  | 37.6349   | 26.8906    | 1         |
| cg18867912                     | WDR88;WDR88                   | 0.00012239        | 0.000122392          | 3.67016            | 3.67016                      | T up vs N                              | 25.333  | 15.8345   | 10.0007    | 1         |
| cg18874332                     | NR1H4                         | 0.00046608        | 0.000466079          | 0.2745             | -3.64298                     | T down vs N                            | 19.186  | 15.654    | 13.0548    | 1         |
| cg18875435                     | NOTCH3                        | 0.00018115        | 0.000181153          | 0.190664           | -5.24482                     | T down vs N                            | 23.421  | 25.7237   | 17.5733    | 1         |
| cg18876007                     | LHX8                          | 3.27E-05          | 3.27E-05             | 0.159422           | -6.27266                     | T down vs N                            | 32.526  | 31.5793   | 15.5341    | 1         |
| cg18877271                     | TNNT3;TNNT3;TNNT3;TNNT3       | 0.00026563        | 0.000265626          | 0.150573           | -3.64128                     | T down vs N                            | 21.644  | 33.5739   | 24.8195    | 1         |
| cg18877285                     | HEPACAM                       | 0.0001195         | 0.000119497          | 4.45121            | 4.45121                      | T up vs N                              | 25.453  | 20.8825   | 13.1268    | 1         |
| cg18877506                     | PDPN;PDPN;PDPN;PDPN           | 0.00222832        | 0.00222832           | 10.7001            | 10.7001                      | T up vs N                              | 13.213  | 52.6201   | 63.7189    | 1         |
| cg18880897                     | ERAP2;ERAP2;ERAP2             | 0.00355293        | 0.00355293           | 0.212435           | -4.70732                     | T down vs N                            | 11.92   | 21.1545   | 26.6198    | 1         |
| cg18881641                     | C6orf120;WDR27;C6orf120       | 6.60E-05          | 6.60E-05             | 0.201225           | -4.96957                     | T down vs N                            | 28.549  | 24.0774   | 13.494     | 1         |
| cg18882819                     | EPSTI1;EPSTI1                 | 0.00558282        | 0.00558282           | 0.252727           | -3.95684                     | T down vs N                            | 10.237  | 17.7194   | 27.6941    | 1         |
| cg18883476                     | DPP6;DPP6                     | 0.00066452        | 0.000664523          | 0.106164           | -9.41941                     | T down vs N                            | 18.275  | 44.3407   | 36.3948    | 1         |
| cg18883538                     | PSG4;PSG4;PSG4;PSG4           | 2.33E-06          | 2.33E-06             | 0.192125           | -5.20495                     | T down vs N                            | 51.047  | 25.4873   | 7.98867    | 1         |
| cg18884942                     | FCRLA                         | 0.00198459        | 0.00198459           | 0.311938           | -3.20576                     | T down vs N                            | 13.615  | 12.7109   | 14.9378    | 1         |
| cg18886071                     | SLAMF1;SLAMF1                 | 0.00086096        | 0.000860958          | 0.313115           | -3.19372                     | T down vs N                            | 16.698  | 12.6289   | 12.1011    | 1         |
| cg18888710                     | ATP6V1C2;ATP6V1C2             | 0.00056209        | 0.000562091          | 0.331449           | -3.01706                     | T down vs N                            | 18.405  | 11.4215   | 9.92883    | 1         |
| PCDHGA4;PCDHGA2;PCDHGA5;PCDHG  |                               |                   |                      |                    |                              |                                        |         |           |            |           |
| B2;PCDHGA1;PCDHGB1;PCDHGA3;PC  |                               |                   |                      |                    |                              |                                        |         |           |            |           |
| cg18891762                     | DHGA5                         | 0.00011213        | 0.000112125          | 3.82179            | 3.82179                      | T up vs N                              | 25.774  | 16.8359   | 10.4514    | 1         |
| cg18892169                     | CTSS                          | 1.37E-05          | 1.37E-05             | 0.182959           | -5.4657                      | T down vs N                            | 37.971  | 27.0202   | 11.3855    | 1         |
| cg18897025                     | TSLP;TSLP                     | 1.04E-05          | 1.04E-05             | 0.271866           | -3.67828                     | T down vs N                            | 39.778  | 15.8884   | 6.39078    | 1         |
| cg18900271                     | MALL                          | 0.00034457        | 0.000344565          | 0.327184           | -3.05638                     | T down vs N                            | 20.484  | 11.6909   | 9.13168    | 1         |
| cg18900812                     | CDKN1A;CDKN1A                 | 0.00198378        | 0.00198378           | 0.310063           | -3.22516                     | T down vs N                            | 13.616  | 12.8428   | 15.0913    | 1         |
| cg18901980                     | KRT25;KRT25                   | 0.00023443        | 0.000234432          | 0.307316           | -3.25398                     | T down vs N                            | 22.214  | 13.0387   | 9.39132    | 1         |
| cg18904891                     | CLDN23;CLDN23                 | 0.00030091        | 0.00030091           | 35.0288            | 35.0288                      | T up vs N                              | 21.083  | 118.448   | 89.8906    | 1         |
| cg18905866                     | FBN2                          | 0.00064464        | 0.000644638          | 3.2297             | 3.2297                       | T up vs N                              | 17.846  | 12.8738   | 11.5419    | 1         |
| cg18907770                     | POMP                          | 0.00251665        | 0.00251665           | 0.320226           | -3.12279                     | T down vs N                            | 12.798  | 12.1451   | 15.1841    | 1         |
| cg18911395                     | LHX5                          | 0.00010365        | 0.000103648          | 0.146947           | -6.80517                     | T down vs N                            | 26.174  | 34.4441   | 21.0559    | 1         |
| cg18911472                     | TEX14;TEX14                   | 0.00237931        | 0.00237931           | 7.66783            | 7.66783                      | T up vs N                              | 12.988  | 38.8649   | 47.8765    | 1         |
| cg18912768                     | ABCB11;ABCB11                 | 1.63E-05          | 1.63E-05             | 0.178609           | -5.59883                     | T down vs N                            | 36.836  | 27.7913   | 12.0715    | 1         |
| cg18912847                     | SLMO2                         | 0.00084914        | 0.000849143          | 0.306363           | -3.2641                      | T down vs N                            | 16.752  | 13.1075   | 12.5194    | 1         |
| cg18916055                     | ST6GALNAC2                    | 3.68E-05          | 3.68E-05             | 0.207589           | -4.81722                     | T down vs N                            | 31.821  | 23.1513   | 11.6408    | 1         |
| cg18919017                     | DPYSL3                        | 0.00034614        | 0.000346138          | 0.328027           | -3.04853                     | T down vs N                            | 20.464  | 11.6371   | 9.09855    | 1         |
| cg18919225                     | PAH                           | 0.00095991        | 0.00095991           | 4.70133            | 4.70133                      | T up vs N                              | 16.277  | 22.4397   | 22.0579    | 1         |
| cg18919478                     | CTHRC1                        | 6.30E-05          | 6.30E-05             | 0.268479           | -3.72468                     | T down vs N                            | 28.796  | 16.1957   | 8.99895    | 1         |
| cg18919659                     | PACSLN2                       | 2.81E-05          | 2.81E-05             | 0.293401           | -3.4083                      | T down vs N                            | 33.422  | 14.083    | 6.74192    | 1         |
| cg18923105                     | SYNE2;SYNE2                   | 1.80E-05          | 1.80E-05             | 0.28669            | -3.48809                     | T down vs N                            | 36.198  | 14.6195   | 6.46211    | 1         |
| cg18923721                     | PIK3R5                        | 0.00177532        | 0.00177532           | 3.23415            | 3.23415                      | T up vs N                              | 14.007  | 12.904    | 14.7401    | 1         |
| PCDHGA4;PCDHGA6;PCDHGA1;PCDHG  |                               |                   |                      |                    |                              |                                        |         |           |            |           |
| A5;PCDHGB1;PCDHGB4;PCDHGA3;PC  |                               |                   |                      |                    |                              |                                        |         |           |            |           |
| cg18926108                     | DHGA2;PCDHGA8;PCDHGA7;PCDHGB2 | 0.00015335        | 0.000153351          | 3.40501            | 3.40501                      | T up vs N                              | 24.222  | 14.0608   | 9.28801    | 1         |
| cg18933685                     | SDK1;SDK1                     | 0.00603752        | 0.00603752           | 0.308999           | -3.23626                     | T down vs N                            | 10      | 12.9183   | 20.6693    | 1         |
| cg18934443                     | ATP6V0E2;LOC401431;ATP6V0E2   | 0.00076215        | 0.000762153          | 0.304175           | -3.28758                     | T down vs N                            | 17.176  | 13.2668   | 12.3582    | 1         |
| cg18937934                     | FRY                           | 8.16E-05          | 8.16E-05             | 0.257396           | -3.88507                     | T down vs N                            | 27.416  | 17.2509   | 10.0676    | 1         |
| cg18940258                     | LOC389033                     | 0.00053114        | 0.000531143          | 0.312364           | -3.2014                      | T down vs N                            | 18.639  | 12.6812   | 10.8856    | 1         |

| Probeset ID                                                        | UCSC_REFGENE_NAME             | p-value<br>(Type) | p-value (T vs.<br>N) | Ratio (T<br>vs. N) | Fold-<br>Change (T<br>vs. N) | Fold-Change (T vs.<br>N) (Description) | F(Type) | SS (Type) | SS (Error) | F (Error) |
|--------------------------------------------------------------------|-------------------------------|-------------------|----------------------|--------------------|------------------------------|----------------------------------------|---------|-----------|------------|-----------|
| cg18941458                                                         | HSPG2                         | 0.00035323        | 0.00035323           | 0.205757           | -4.8601                      | T down vs N                            | 20.375  | 23.413    | 18.3853    | 1         |
| cg18944383                                                         | ENPEP                         | 0.00024082        | 0.000240816          | 0.236088           | -4.23572                     | T down vs N                            | 22.091  | 19.5176   | 14.1364    | 1         |
| cg18949521                                                         | ORSV1                         | 1.68E-06          | 1.68E-06             | 0.170433           | -5.8674                      | T down vs N                            | 53.779  | 29.3238   | 8.72424    | 1         |
| cg18951582                                                         | ADSSL1;ADSSL1                 | 0.00014105        | 0.000141051          | 0.23336            | -4.28522                     | T down vs N                            | 24.63   | 19.8331   | 12.8837    | 1         |
| cg18953509                                                         | MSH5;MSH5;MSH5;MSH5           | 1.68E-07          | 1.68E-07             | 0.332689           | -3.00581                     | T down vs N                            | 76.697  | 11.3443   | 2.36659    | 1         |
| cg18959065                                                         | ALK                           | 0.00070534        | 0.000705342          | 0.311223           | -3.21313                     | T down vs N                            | 17.485  | 12.761    | 11.6776    | 1         |
| cg18959309                                                         | C1orf115                      | 0.00021139        | 0.000211394          | 3.30668            | 3.30668                      | T up vs N                              | 22.694  | 13.3963   | 9.44503    | 1         |
| cg18959478                                                         | PRKCDBP                       | 2.55E-05          | 2.55E-05             | 5.18607            | 5.18607                      | T up vs N                              | 34.007  | 25.3752   | 11.9388    | 1         |
| cg18963365                                                         | MFS6L                         | 8.86E-05          | 8.86E-05             | 3.46876            | 3.46876                      | T up vs N                              | 26.981  | 14.4898   | 8.59256    | 1         |
| cg18963509                                                         | WNK4                          | 9.14E-05          | 9.14E-05             | 5.39676            | 5.39676                      | T up vs N                              | 26.821  | 26.6178   | 15.8787    | 1         |
| cg18964985                                                         | OR2M1P                        | 0.00020873        | 0.000208732          | 0.190502           | -5.24929                     | T down vs N                            | 22.753  | 25.7501   | 18.1079    | 1         |
| cg18966688                                                         | AUTS2;AUTS2                   | 0.00199394        | 0.00199394           | 0.11872            | -8.42319                     | T down vs N                            | 13.598  | 42.5328   | 50.0447    | 1         |
| cg18970151                                                         | PCCA;PCCA                     | 0.00347784        | 0.00347784           | 0.269634           | -3.70873                     | T down vs N                            | 11.725  | 16.0902   | 21.9563    | 1         |
| cg18972751                                                         | CD1C                          | 0.00463519        | 0.00463519           | 0.288942           | -3.46091                     | T down vs N                            | 10.811  | 14.437    | 21.3667    | 1         |
| cg18972885                                                         | EMX2OS                        | 0.00038116        | 0.000381157          | 0.162294           | -6.16166                     | T down vs N                            | 20.045  | 30.9681   | 24.7193    | 1         |
| cg18972998                                                         | TTC22;TTC22                   | 6.14E-07          | 6.14E-07             | 6.02938            | 6.02938                      | T up vs N                              | 63.004  | 30.2333   | 7.6778     | 1         |
| cg18980857                                                         | KDM4D                         | 0.0004692         | 0.000469196          | 0.245067           | -4.08052                     | T down vs N                            | 19.158  | 18.5213   | 15.4686    | 1         |
| cg18982923                                                         | OAT                           | 4.11E-07          | 4.11E-07             | 0.274267           | -3.64608                     | T down vs N                            | 67.001  | 15.6746   | 3.74315    | 1         |
| cg18986165                                                         | SIGLEC12                      | 0.00198361        | 0.00198361           | 0.280798           | -3.56128                     | T down vs N                            | 13.617  | 15.1095   | 17.7544    | 1         |
| cg18987410                                                         | HEPACAM                       | 0.00039365        | 0.000393651          | 3.68081            | 3.68081                      | T up vs N                              | 19.905  | 15.9052   | 12.7846    | 1         |
| cg18988856                                                         | CYP3A43;CYP3A43;CYP3A43       | 1.33E-05          | 1.33E-05             | 0.270056           | -3.70293                     | T down vs N                            | 38.147  | 16.0518   | 6.7327     | 1         |
| cg18990313                                                         | HTRA4                         | 1.53E-05          | 1.53E-05             | 7.46265            | 7.46265                      | T up vs N                              | 37.216  | 37.8368   | 16.2667    | 1         |
| cg18994063                                                         | TIMD4;TIMD4                   | 2.78E-05          | 2.78E-05             | 0.260262           | -3.84228                     | T down vs N                            | 33.497  | 16.9705   | 8.10602    | 1         |
| cg18997129                                                         | EPHA1                         | 3.26E-05          | 3.26E-05             | 5.80946            | 5.80946                      | T up vs N                              | 32.539  | 28.9958   | 14.2578    | 1         |
| cg18998670                                                         | VRK2;VRK2;VRK2;VRK2;VRK2      | 1.28E-06          | 1.28E-06             | 0.271206           | -3.68723                     | T down vs N                            | 56.151  | 15.9477   | 4.54426    | 1         |
| cg19002462                                                         | LDLRAD3                       | 0.0001652         | 0.0001652            | 0.290016           | -3.44808                     | T down vs N                            | 23.862  | 14.3508   | 9.62258    | 1         |
| cg19002828                                                         | ITM2A;ITM2A                   | 0.0001355         | 0.0001355            | 0.268268           | -3.72761                     | T down vs N                            | 24.828  | 16.2151   | 10.4496    | 1         |
| cg19005368                                                         | PRRG4                         | 0.00018855        | 0.000188547          | 3.23555            | 3.23555                      | T up vs N                              | 23.231  | 12.9135   | 8.89402    | 1         |
| cg19005390                                                         | COL4A1                        | 2.52E-05          | 2.52E-05             | 0.237635           | -4.20814                     | T down vs N                            | 34.076  | 19.3414   | 9.08168    | 1         |
| cg19005707                                                         | GABRA5;GABRA5                 | 0.00057849        | 0.000578486          | 3.36508            | 3.36508                      | T up vs N                              | 18.287  | 13.7913   | 12.0664    | 1         |
| cg19005955                                                         | FSTL4                         | 2.66E-05          | 2.66E-05             | 0.294996           | -3.38988                     | T down vs N                            | 33.761  | 13.9588   | 6.6153     | 1         |
| cg19006008                                                         | F2RL3                         | 1.48E-05          | 1.48E-05             | 0.274891           | -3.6378                      | T down vs N                            | 37.451  | 15.6196   | 6.67317    | 1         |
| cg19006378                                                         | PAX6;PAX6;PAX6                | 0.00024003        | 0.000240029          | 0.252357           | -3.96265                     | T down vs N                            | 22.106  | 17.7572   | 12.8526    | 1         |
| cg19007908                                                         | TRPM4                         | 0.00045249        | 0.000452486          | 3.11158            | 3.11158                      | T up vs N                              | 19.311  | 12.0685   | 9.99949    | 1         |
| cg19007948                                                         | MYLK4                         | 0.00274577        | 0.00274577           | 0.285918           | -3.49751                     | T down vs N                            | 12.504  | 14.6827   | 18.7874    | 1         |
| cg19007988                                                         | CHMP2B                        | 0.00027162        | 0.000271622          | 0.257917           | -3.87721                     | T down vs N                            | 21.543  | 17.1994   | 12.7743    | 1         |
| cg19008088                                                         | TLX1;TLX1NB                   | 1.44E-08          | 1.44E-08             | 0.235276           | -4.25033                     | T down vs N                            | 109.69  | 19.6108   | 2.8606     | 1         |
| cg19008597                                                         | BCAT1                         | 6.11E-07          | 6.11E-07             | 0.219335           | -4.55925                     | T down vs N                            | 63.056  | 21.5587   | 5.47041    | 1         |
| cg19011552                                                         | MIR514-2;MIR514-3             | 3.73E-05          | 3.73E-05             | 0.228898           | -4.36875                     | T down vs N                            | 31.747  | 20.3628   | 10.2627    | 1         |
| cg19013753                                                         | SNUPN;SNUPN;SNUPN             | 0.0005258         | 0.0005258            | 3.18846            | -3.13631                     | T down vs N                            | 18.681  | 12.2374   | 10.481     | 1         |
| cg19014335                                                         | FMNL3;FMNL3                   | 3.61E-05          | 3.61E-05             | 0.168119           | -5.94817                     | T down vs N                            | 31.929  | 29.7787   | 14.9226    | 1         |
| cg19015847                                                         | SLC8A1;SLC8A1;SLC8A1;SLC8A1   | 3.51E-05          | 3.51E-05             | 0.24086            | -4.15179                     | T down vs N                            | 32.106  | 18.9802   | 9.45863    | 1         |
| cg19015997                                                         | SCIN                          | 0.00023547        | 0.000235466          | 0.282011           | -3.54596                     | T down vs N                            | 22.194  | 15.0071   | 10.8189    | 1         |
| cg19024161                                                         | PBLD;PBLD                     | 8.68E-05          | 8.68E-05             | 0.313752           | -3.18723                     | T down vs N                            | 27.087  | 12.5847   | 7.43371    | 1         |
| cg19024632                                                         | KCNS3                         | 0.00083362        | 0.000833619          | 4.4167             | 4.4167                       | T up vs N                              | 16.824  | 20.6654   | 19.6535    | 1         |
| cg19030737                                                         | ITPKB                         | 2.82E-06          | 2.82E-06             | 0.192454           | -5.19606                     | T down vs N                            | 49.479  | 25.4345   | 8.22483    | 1         |
| cg19032797                                                         | LRRRC8E                       | 4.09E-07          | 4.09E-07             | 0.197224           | -5.07039                     | T down vs N                            | 67.062  | 24.6844   | 5.8893     | 1         |
| cg19037007                                                         | C20orf54                      | 0.00031894        | 0.000318935          | 5.488              | 5.488                        | T up vs N                              | 20.825  | 27.1499   | 20.8599    | 1         |
| cg19038462                                                         | ZEB1;ZEB1;ZEB1;ZEB1;ZEB1      | 0.00050042        | 0.000500422          | 0.219801           | -4.54957                     | T down vs N                            | 18.887  | 21.4984   | 18.212     | 1         |
| cg19042287                                                         | NR2E1                         | 0.00021221        | 0.000212207          | 0.260922           | -3.83256                     | T down vs N                            | 22.676  | 16.9067   | 11.9294    | 1         |
| cg19044462                                                         | KRTAP9-9;KRTAP9-4             | 0.00049515        | 0.000495151          | 0.200181           | -4.99547                     | T down vs N                            | 18.932  | 24.2338   | 20.4812    | 1         |
| cg19045239                                                         | HIF3A                         | 0.00010941        | 0.000109413          | 0.211978           | -4.71747                     | T down vs N                            | 25.898  | 22.5391   | 13.9249    | 1         |
| cg19045345                                                         | PNLDC1                        | 4.07E-06          | 4.07E-06             | 0.260314           | -3.84152                     | T down vs N                            | 46.595  | 16.9655   | 5.82567    | 1         |
| cg19045983                                                         | FAM18B2;FAM18B2               | 0.00066074        | 0.000660737          | 6.13002            | 6.13002                      | T up vs N                              | 17.747  | 30.793    | 27.7622    | 1         |
| cg19047226                                                         | GNA15                         | 1.21E-05          | 1.21E-05             | 0.243453           | -4.10757                     | T down vs N                            | 38.803  | 18.6957   | 7.70894    | 1         |
| cg19048532                                                         | HOXA3;HOXA3;HOXA3             | 0.00033316        | 0.000333163          | 5.64007            | 5.64007                      | T up vs N                              | 20.632  | 28.0286   | 21.7361    | 1         |
| cg19049734                                                         | LOC154449                     | 0.00014309        | 0.000143089          | 0.220821           | -4.52854                     | T down vs N                            | 24.56   | 21.3671   | 13.92      | 1         |
| cg19050914                                                         | ARMCX6;ARMCX6                 | 0.00115872        | 0.00115872           | 0.261528           | -3.82369                     | T down vs N                            | 15.563  | 16.8484   | 17.3218    | 1         |
| cg19054158                                                         | C7orf50;C7orf50;C7orf50       | 0.0008713         | 0.000871303          | 6.99389            | 6.99389                      | T up vs N                              | 16.651  | 35.4338   | 34.0478    | 1         |
| cg19055323                                                         | KRTAP4-1                      | 0.00067963        | 0.000679626          | 0.266548           | -3.75167                     | T down vs N                            | 17.633  | 16.3741   | 14.8574    | 1         |
| cg19056700                                                         | UQCRF51                       | 0.00109849        | 0.00109849           | 0.291364           | -3.43213                     | T down vs N                            | 15.764  | 14.2435   | 14.4572    | 1         |
| cg19057830                                                         | C10orf41;C10orf41             | 7.21E-05          | 7.21E-05             | 6.8794             | 6.8794                       | T up vs N                              | 28.071  | 34.8349   | 19.8553    | 1         |
| cg19062354                                                         | OR8U8;OR9G9;OR9G1             | 8.83E-07          | 8.83E-07             | 0.134193           | -7.45196                     | T down vs N                            | 59.538  | 37.7829   | 10.1536    | 1         |
| cg19064302                                                         | PRDM1                         | 7.21E-06          | 7.21E-06             | 0.297746           | -3.35857                     | T down vs N                            | 42.363  | 13.7474   | 5.19221    | 1         |
| cg19066589                                                         | C3orf38                       | 0.00010339        | 0.000103388          | 0.242663           | -4.12094                     | T down vs N                            | 26.186  | 18.7819   | 11.4758    | 1         |
| cg19071452                                                         | NMI                           | 8.28E-06          | 8.28E-06             | 0.242989           | -4.11541                     | T down vs N                            | 41.376  | 18.7462   | 7.24911    | 1         |
| cg19074496                                                         | TUBA4B;TUBA4A                 | 0.0050611         | 0.0050611            | 4.61661            | 4.61661                      | T up vs N                              | 10.538  | 21.9156   | 33.2749    | 1         |
| CACNA1G;CACNA1G;CACNA1G;CACNA1G;CACNA1G;CACNA1G;CACNA1G;CACNA1G;CA |                               |                   |                      |                    |                              |                                        |         |           |            |           |
| cg19075717                                                         | CNA1G;CACNA1G;CACNA1G;CACNA1G | 0.0005602         | 0.000560203          | 0.327832           | -3.05034                     | T down vs N                            | 18.419  | 11.6495   | 10.1195    | 1         |
| cg19081021                                                         | TBCEL1;TBCEL                  | 7.81E-05          | 7.81E-05             | 0.230908           | -4.33073                     | T down vs N                            | 27.647  | 20.1221   | 11.6452    | 1         |

| Probeset ID | UCSC_REFGENE_NAME                       | p-value<br>(Type) | p-value (T vs.<br>N) | Ratio (T<br>vs. N) | Fold-<br>Change (T<br>vs. N) | Fold-Change (T vs.<br>N) (Description) | F(Type) | SS (Type) | SS (Error) | F (Error) |
|-------------|-----------------------------------------|-------------------|----------------------|--------------------|------------------------------|----------------------------------------|---------|-----------|------------|-----------|
| cg19081101  | CHI3L1                                  | 0.00149101        | 0.00149101           | 0.24461            | -4.08813                     | T down vs N                            | 14.633  | 18.5704   | 20.3054    | 1         |
| cg19083497  | ZNF474                                  | 6.38E-07          | 6.38E-07             | 0.300113           | -3.33208                     | T down vs N                            | 62.625  | 13.5683   | 3.46654    | 1         |
| cg19084479  | POLD2;POLD2                             | 4.05E-05          | 4.05E-05             | 4.68202            | 4.68202                      | T up vs N                              | 31.277  | 22.3205   | 11.4182    | 1         |
| cg19086540  | PRR5L;PRR5L;PRR5L                       | 1.84E-05          | 1.84E-05             | 0.269025           | -3.71713                     | T down vs N                            | 36.027  | 16.1458   | 7.17045    | 1         |
| cg19087039  | EHHADH;EHHADH                           | 0.00249736        | 0.00249736           | 0.300974           | -3.32254                     | T down vs N                            | 12.824  | 13.5037   | 16.8484    | 1         |
| cg19088553  | GRIK2;GRIK2;GRIK2                       | 0.00619625        | 0.00619625           | 3.41476            | 3.41476                      | T up vs N                              | 9.922   | 14.1265   | 22.7801    | 1         |
| cg19088856  | HRNR                                    | 9.90E-05          | 9.90E-05             | 0.239776           | -4.17057                     | T down vs N                            | 27.505  | 17.9771   | 9.80391    | 1         |
| cg19088912  | CST6                                    | 0.00020697        | 0.000206966          | 0.159766           | -6.25915                     | T down vs N                            | 22.792  | 31.5051   | 22.1163    | 1         |
| cg19089201  | MYO1G                                   | 0.00114563        | 0.00114563           | 5.75545            | 5.75545                      | T up vs N                              | 15.605  | 28.6887   | 29.4143    | 1         |
| cg19089328  | NADSYN1                                 | 3.05E-05          | 3.05E-05             | 0.273384           | -3.65786                     | T down vs N                            | 32.936  | 15.7529   | 7.65266    | 1         |
| cg19091641  | ZIP2                                    | 5.41E-06          | 5.41E-06             | 0.238832           | -4.18705                     | T down vs N                            | 44.455  | 19.2064   | 6.9126     | 1         |
| cg19092343  | CYP4B1;CYP4B1                           | 0.0001677         | 0.000167695          | 0.126461           | -7.90759                     | T down vs N                            | 23.79   | 40.0487   | 26.9351    | 1         |
| cg19093370  | PLD6                                    | 0.00350703        | 0.00350703           | 0.141812           | -7.05157                     | T down vs N                            | 11.698  | 35.7336   | 48.8744    | 1         |
| cg19093689  | SPATS2                                  | 1.56E-05          | 1.56E-05             | 5.43123            | 5.43123                      | T up vs N                              | 37.086  | 26.8193   | 11.5705    | 1         |
| cg19093939  | KLHL29                                  | 0.00042337        | 0.000423367          | 0.223465           | -4.47497                     | T down vs N                            | 19.593  | 21.0317   | 17.1746    | 1         |
| cg19096475  | ASAM                                    | 3.26E-05          | 3.26E-05             | 4.47887            | 4.47887                      | T up vs N                              | 32.528  | 21.0562   | 10.3571    | 1         |
| cg19099433  | ALLC                                    | 0.00050964        | 0.000509635          | 0.307021           | -3.25711                     | T down vs N                            | 18.811  | 13.06     | 11.1083    | 1         |
| cg19100779  | ASB4;ASB4                               | 0.0002038         | 0.000203796          | 0.177531           | -5.63283                     | T down vs N                            | 22.865  | 27.987    | 19.5845    | 1         |
| cg19103398  | C3orf67                                 | 0.00171668        | 0.00171668           | 0.296503           | -3.37265                     | T down vs N                            | 14.126  | 13.8425   | 15.6785    | 1         |
| cg19103429  | CDK6;CDK6                               | 0.00104566        | 0.00104566           | 0.196042           | -5.10096                     | T down vs N                            | 15.95   | 24.8675   | 24.9453    | 1         |
| cg19103546  | ZDHHC11                                 | 0.0002529         | 0.000252896          | 0.25869            | -3.86563                     | T down vs N                            | 21.867  | 17.1236   | 12.5294    | 1         |
| cg19103704  | FCGBP                                   | 1.30E-06          | 1.30E-06             | 0.177459           | -5.6351                      | T down vs N                            | 56.007  | 28        | 7.99902    | 1         |
| cg19108771  | TNXB                                    | 2.97E-05          | 2.97E-05             | 0.293008           | -3.41287                     | T down vs N                            | 33.092  | 14.1138   | 6.82403    | 1         |
| cg19109601  | UTP20                                   | 0.00375164        | 0.00375164           | 0.328886           | -3.04057                     | T down vs N                            | 11.481  | 11.5826   | 16.1422    | 1         |
| cg19110758  | SPDEF                                   | 3.10E-05          | 3.10E-05             | 0.314855           | -3.17607                     | T down vs N                            | 32.826  | 12.5086   | 6.09694    | 1         |
| cg19111238  | WFDC11                                  | 1.51E-05          | 1.51E-05             | 0.328338           | -3.04565                     | T down vs N                            | 37.311  | 11.6174   | 4.98188    | 1         |
| cg19112186  | CPT1B;CPT1B;CPT1B;CHKB-                 | 9.44E-06          | 9.44E-06             | 10.5001            | 10.5001                      | T up vs N                              | 40.468  | 51.7857   | 20.4745    | 1         |
| cg19113081  | FAM55B                                  | 6.84E-06          | 6.84E-06             | 0.221492           | -4.51484                     | T down vs N                            | 42.738  | 21.2815   | 7.96732    | 1         |
| cg19115205  | LOC340094                               | 0.00127725        | 0.00127725           | 0.17013            | -5.87787                     | T down vs N                            | 15.2    | 29.3829   | 30.9295    | 1         |
| cg19126169  | NUMA1                                   | 8.58E-06          | 8.58E-06             | 6.05352            | 6.05352                      | T up vs N                              | 41.131  | 30.3679   | 11.8132    | 1         |
| cg19127747  | C6orf25;C6orf25;C6orf25;C6orf25;C6orf25 | 0.00010348        | 0.000103477          | 0.330322           | -3.02735                     | T down vs N                            | 26.182  | 11.492    | 7.02287    | 1         |
| cg19127840  | MIR223                                  | 0.00014242        | 0.00014242           | 0.154566           | -6.46973                     | T down vs N                            | 24.583  | 32.6522   | 21.252     | 1         |
| cg19130189  | MMP16;MMP16                             | 0.00154365        | 0.00154365           | 0.261075           | -3.83031                     | T down vs N                            | 14.507  | 16.8919   | 18.63      | 1         |
| cg19130824  | ANXA5                                   | 7.36E-05          | 7.36E-05             | 0.323635           | -3.0899                      | T down vs N                            | 27.958  | 11.9203   | 6.82191    | 1         |
| cg19132733  | GTF2H4                                  | 3.36E-05          | 3.36E-05             | 0.315609           | -3.16848                     | T down vs N                            | 32.351  | 12.4569   | 6.16092    | 1         |
| cg19137649  | RTKN2                                   | 9.90E-05          | 9.90E-05             | 0.241656           | -4.13811                     | T down vs N                            | 26.41   | 18.8923   | 11.4456    | 1         |
| cg19138905  | ORS1T1                                  | 0.00337088        | 0.00337088           | 0.275366           | -3.63153                     | T down vs N                            | 11.827  | 15.5778   | 21.0746    | 1         |
| cg19138960  | CD93;CD93                               | 1.20E-09          | 1.20E-09             | 0.320175           | -3.1233                      | T down vs N                            | 155.12  | 12.1485   | 1.25311    | 1         |
| cg19139618  | SKAP1;SKAP1                             | 6.71E-05          | 6.71E-05             | 0.149389           | -6.69392                     | T down vs N                            | 28.453  | 33.8545   | 19.0376    | 1         |
| cg19139729  | SULT2A1;SULT2A1                         | 0.00012723        | 0.000127227          | 0.288107           | -3.47093                     | T down vs N                            | 26.147  | 13.6511   | 7.83141    | 1         |
| cg19143170  | C4orf22                                 | 1.32E-05          | 1.32E-05             | 0.256622           | -3.89679                     | T down vs N                            | 38.22   | 17.3275   | 7.25372    | 1         |
| cg19148281  | PHLDB2;PHLDB2;PHLDB2;PHLDB2             | 0.00014371        | 0.000143707          | 3.4113             | 3.4113                       | T up vs N                              | 24.539  | 14.1032   | 9.19572    | 1         |
| cg19150007  | KCND2                                   | 0.00234641        | 0.00234641           | 0.087295           | -11.4554                     | T down vs N                            | 13.036  | 55.692    | 68.355     | 1         |
| cg19153095  | ZFPM2                                   | 0.00030169        | 0.000301689          | 0.283333           | -3.52942                     | T down vs N                            | 21.072  | 14.8965   | 11.3112    | 1         |
| cg19154438  | CKM                                     | 0.00100021        | 0.00100021           | 0.293575           | -3.40629                     | T down vs N                            | 16.119  | 14.0694   | 13.9652    | 1         |
| cg19155735  | NOTCH4                                  | 0.00610705        | 0.00610705           | 0.295919           | -3.37931                     | T down vs N                            | 9.9656  | 13.8874   | 22.2966    | 1         |
| cg19157647  | MIR1180;B9D1                            | 5.71E-05          | 5.71E-05             | 0.232364           | -4.30359                     | T down vs N                            | 29.338  | 19.9498   | 10.8801    | 1         |
| cg19163058  | ADARB2                                  | 0.00278323        | 0.00278323           | 0.320101           | -3.12401                     | T down vs N                            | 12.459  | 12.1534   | 15.6077    | 1         |
| cg19163939  | ADAP1                                   | 0.00022147        | 0.000221473          | 0.265491           | -3.76661                     | T down vs N                            | 22.477  | 16.4727   | 11.726     | 1         |
| cg19164335  | DHH                                     | 0.00050123        | 0.000501227          | 3.34552            | 3.34552                      | T up vs N                              | 18.881  | 13.6592   | 11.5753    | 1         |
| cg19165854  | KIAA1024                                | 0.00050429        | 0.000504286          | 5.99291            | 5.99291                      | T up vs N                              | 18.855  | 30.0295   | 25.4823    | 1         |
| cg19166799  | BMPR1A                                  | 0.00010271        | 0.000102712          | 0.296802           | -3.36925                     | T down vs N                            | 26.22   | 13.8195   | 8.433      | 1         |
| cg19170660  | HCG18;HCG18                             | 0.00010178        | 0.000101783          | 0.186709           | -5.35592                     | T down vs N                            | 26.266  | 26.3785   | 16.0683    | 1         |
| cg19170881  | EMID2                                   | 0.00081574        | 0.00081574           | 0.268169           | -3.729                       | T down vs N                            | 16.909  | 16.2243   | 15.3524    | 1         |
| cg19172265  | BHLHB9;BHLHB9;BHLHB9;BHLHB9;BH          | 0.00032614        | 0.000326144          | 0.265228           | -3.77034                     | T down vs N                            | 20.726  | 16.4973   | 12.7357    | 1         |
| cg19176541  | ENOX1;ENOX1                             | 4.13E-05          | 4.13E-05             | 0.280124           | -3.56985                     | T down vs N                            | 31.158  | 15.1668   | 7.78829    | 1         |
| cg19177627  | LOC100132215                            | 0.0002051         | 0.000205102          | 7.54735            | 7.54735                      | T up vs N                              | 23.689  | 36.0122   | 22.8035    | 1         |
| cg19181310  | BAHD1                                   | 0.00034313        | 0.00034313           | 0.302005           | -3.31121                     | T down vs N                            | 20.502  | 13.4269   | 10.4783    | 1         |
| cg19183166  | LRR61;ACTR3C;LRR61                      | 0.00218819        | 0.00218819           | 5.18361            | 5.18361                      | T up vs N                              | 13.276  | 25.3605   | 30.5648    | 1         |
| cg19183842  | DLL3;DLL3                               | 0.00112491        | 0.00112491           | 3.52249            | 3.52249                      | T up vs N                              | 15.674  | 14.8501   | 15.1591    | 1         |
| cg19186089  | ATP5G1;ATP5G1                           | 3.19E-06          | 3.19E-06             | 0.269927           | -3.70471                     | T down vs N                            | 48.502  | 16.0636   | 5.29912    | 1         |
| cg19188612  | CTHRC1                                  | 1.77E-06          | 1.77E-06             | 0.314851           | -3.17611                     | T down vs N                            | 53.329  | 12.5089   | 3.75298    | 1         |
| cg19191560  | LGR4                                    | 0.000807          | 0.000807004          | 0.184178           | -5.42954                     | T down vs N                            | 16.951  | 26.8095   | 25.3054    | 1         |
| cg19192101  | NTN1                                    | 1.04E-05          | 1.04E-05             | 4.43843            | 4.43843                      | T up vs N                              | 39.83   | 20.8022   | 8.35643    | 1         |
| cg19193135  | CD3G                                    | 0.00015344        | 0.000153442          | 0.266645           | -3.75031                     | T down vs N                            | 24.219  | 16.3651   | 10.8114    | 1         |
| cg19193155  | LOC349196                               | 0.00035286        | 0.00035286           | 0.142895           | -6.99816                     | T down vs N                            | 20.38   | 35.456    | 27.8359    | 1         |
| cg19196826  | CARD11                                  | 0.00109582        | 0.00109582           | 3.12841            | 3.12841                      | T up vs N                              | 15.773  | 12.1835   | 12.3591    | 1         |
| cg19197212  | C2CD4B;C2CD4B                           | 0.00030037        | 0.000300367          | 3.93994            | 3.93994                      | T up vs N                              | 21.091  | 17.6093   | 13.3587    | 1         |

| Probeset ID                        | UCSC_REFGENE_NAME            | p-value<br>(Type) | p-value (T vs.<br>N) | Ratio (T<br>vs. N) | Fold-<br>Change (T<br>vs. N) | Fold-Change (T vs.<br>N) (Description) | F(Type) | SS (Type) | SS (Error) | F (Error) |
|------------------------------------|------------------------------|-------------------|----------------------|--------------------|------------------------------|----------------------------------------|---------|-----------|------------|-----------|
| ALKBH2;ALKBH2;ALKBH2;ALKBH2;ALK    |                              |                   |                      |                    |                              |                                        |         |           |            |           |
| cg19198919                         | BH2                          | 0.00071729        | 0.000717288          | 0.311854           | -3.20663                     | T down vs N                            | 17.417  | 12.7168   | 11.6819    | 1         |
| cg19201144                         | CYP27C1                      | 9.38E-05          | 9.38E-05             | 0.211555           | -4.72691                     | T down vs N                            | 26.686  | 22.5973   | 13.5485    | 1         |
| cg19205847                         | TWIST2                       | 1.74E-06          | 1.74E-06             | 0.30883            | -3.23803                     | T down vs N                            | 53.501  | 12.9304   | 3.86698    | 1         |
| cg19205850                         | RAB7A                        | 2.74E-06          | 2.74E-06             | 0.154281           | -6.48167                     | T down vs N                            | 49.708  | 32.7167   | 10.5308    | 1         |
| cg19213955                         | GPRC5C                       | 0.00388822        | 0.00388822           | 0.175774           | -5.68914                     | T down vs N                            | 12.709  | 21.5696   | 20.3663    | 1         |
| CREM;CREM;CREM;CREM;CREM;CRE       |                              |                   |                      |                    |                              |                                        |         |           |            |           |
| cg19215266                         | M                            | 1.11E-05          | 1.11E-05             | 0.234291           | -4.2682                      | T down vs N                            | 39.354  | 19.7247   | 8.01943    | 1         |
| cg19216994                         | RPLP2;SNORA52                | 0.00048044        | 0.000480441          | 0.289218           | -3.4576                      | T down vs N                            | 19.058  | 14.4148   | 12.1019    | 1         |
| cg19217130                         | FABP1                        | 0.00015457        | 0.000154566          | 0.232321           | -4.30438                     | T down vs N                            | 24.184  | 19.9549   | 13.2023    | 1         |
| cg19217735                         | OR7E91P                      | 0.00014902        | 0.000149021          | 0.240175           | -4.16363                     | T down vs N                            | 24.361  | 19.0562   | 12.5158    | 1         |
| cg19218057                         | PC;PC                        | 0.00072461        | 0.00072461           | 0.203628           | -3.2935                      | T down vs N                            | 17.377  | 13.3069   | 12.2525    | 1         |
| cg19221370                         | MRPS10                       | 0.00110935        | 0.00110935           | 0.321513           | -3.1103                      | T down vs N                            | 16.174  | 11.3503   | 10.5266    | 1         |
| cg19227031                         | PRRT1                        | 0.00010006        | 0.000100064          | 4.40003            | 4.40003                      | T up vs N                              | 26.354  | 20.5603   | 12.4827    | 1         |
| cg19227485                         | SLFN13                       | 0.00648335        | 0.00648335           | 0.293721           | -3.40459                     | T down vs N                            | 9.7864  | 14.058    | 22.9837    | 1         |
| cg19233761                         | HTR3C                        | 1.77E-07          | 1.77E-07             | 0.292702           | -3.41644                     | T down vs N                            | 76.129  | 14.1378   | 2.97136    | 1         |
| cg19234171                         | LOC90246                     | 0.00041083        | 0.000410826          | 0.235226           | -4.25123                     | T down vs N                            | 19.722  | 19.6166   | 15.9145    | 1         |
| cg19236493                         | HOXB3                        | 0.00230341        | 0.00230341           | 4.90055            | 4.90055                      | T up vs N                              | 13.099  | 23.6592   | 28.8984    | 1         |
| cg19238415                         | QSER1                        | 0.0035114         | 0.0035114            | 0.29513            | -3.38834                     | T down vs N                            | 11.694  | 13.9484   | 19.0844    | 1         |
| cg19238824                         | FAM180A                      | 0.00223504        | 0.00223504           | 0.317962           | -3.14503                     | T down vs N                            | 13.203  | 12.2969   | 14.9023    | 1         |
| cg19238840                         | GP2;GP2;GP2;GP2              | 7.53E-05          | 7.53E-05             | 0.275492           | -3.62987                     | T down vs N                            | 27.838  | 15.5668   | 8.94719    | 1         |
| cg19240213                         | HOXA3                        | 0.00029294        | 0.00029294           | 8.39183            | 8.39183                      | T up vs N                              | 21.203  | 42.384    | 31.9836    | 1         |
| cg19240233                         | KIF6                         | 6.82E-06          | 6.82E-06             | 0.3182             | -3.14268                     | T down vs N                            | 42.762  | 12.2809   | 4.59511    | 1         |
| cg19241311                         | DEFB123                      | 4.46E-05          | 4.46E-05             | 0.276588           | -3.61549                     | T down vs N                            | 30.713  | 15.4711   | 8.05974    | 1         |
| cg19241689                         | B3GALT4                      | 0.00037248        | 0.00037248           | 5.38157            | 5.38157                      | T up vs N                              | 20.144  | 26.5289   | 21.071     | 1         |
| cg19241878                         | C17orf73                     | 2.78E-05          | 2.78E-05             | 0.260252           | -3.84242                     | T down vs N                            | 33.476  | 16.9714   | 8.11155    | 1         |
| cg19244562                         | SSPO                         | 0.00024099        | 0.00024099           | 0.277561           | -3.60281                     | T down vs N                            | 22.087  | 15.3867   | 11.1461    | 1         |
| cg19244928                         | MIR516A2                     | 0.00234848        | 0.00234848           | 0.286343           | -3.49232                     | T down vs N                            | 13.033  | 14.6479   | 17.9826    | 1         |
| cg19245616                         | PDE4C;PDE4C;PDE4C            | 0.00018354        | 0.000183537          | 0.328639           | -3.04285                     | T down vs N                            | 23.359  | 11.5982   | 7.94447    | 1         |
| cg19246007                         | COL21A1;COL21A1              | 0.00030645        | 0.000306449          | 5.73543            | 5.73543                      | T up vs N                              | 21.002  | 28.5746   | 21.7693    | 1         |
| cg19246654                         | HIPK2;HIPK2                  | 0.00166965        | 0.00166965           | 3.03256            | 3.03256                      | T up vs N                              | 14.225  | 11.5277   | 12.9657    | 1         |
| cg19247310                         | OR5AN1                       | 2.09E-06          | 2.09E-06             | 0.078383           | -12.7578                     | T down vs N                            | 51.932  | 60.7195   | 18.7073    | 1         |
| PCDHGA4;PCDHGA9;PCDHGA1;PCDHG      |                              |                   |                      |                    |                              |                                        |         |           |            |           |
| B1;PCDHGB6;PCDHGB6;PCDHGB3;PCD     |                              |                   |                      |                    |                              |                                        |         |           |            |           |
| cg19247475                         | HGA6;PCDHGA8;PCDHGA5;PCDHGB4 | 2.60E-06          | 2.60E-06             | 4.77051            | 4.77051                      | T up vs N                              | 50.129  | 22.8652   | 7.29807    | 1         |
| cg19248557                         | HLA-DRA                      | 1.58E-06          | 1.58E-06             | 0.159174           | -6.28243                     | T down vs N                            | 54.302  | 31.6328   | 9.32059    | 1         |
| cg19250709                         | LCE1B                        | 0.00013993        | 0.00013993           | 0.213316           | -4.68788                     | T down vs N                            | 24.669  | 22.3567   | 14.5       | 1         |
| cg19251326                         | LY6G6C                       | 0.00058072        | 0.000580716          | 0.311876           | -3.20641                     | T down vs N                            | 18.271  | 12.7153   | 11.1346    | 1         |
| cg19251500                         | CD79A;CD79A                  | 7.20E-05          | 7.20E-05             | 0.296427           | -3.37351                     | T down vs N                            | 28.077  | 13.8483   | 7.89151    | 1         |
| cg19251719                         | MYOG                         | 0.00021382        | 0.000213822          | 0.311312           | -3.21221                     | T down vs N                            | 22.64   | 12.7548   | 9.0139     | 1         |
| cg19253831                         | CASZ1;CASZ1                  | 0.00101814        | 0.00101814           | 0.304432           | -3.28481                     | T down vs N                            | 16.052  | 13.248    | 13.2054    | 1         |
| cg19254163                         | GPR44                        | 0.00010759        | 0.000107593          | 0.304874           | -3.28004                     | T down vs N                            | 25.983  | 13.2157   | 8.13801    | 1         |
| cg19255477                         | LOC100132111;C2CD4D          | 1.26E-05          | 1.26E-05             | 15.1165            | 15.1165                      | T up vs N                              | 38.491  | 69.08     | 28.7155    | 1         |
| cg19255783                         | PLAC8;PLAC8                  | 7.68E-05          | 7.68E-05             | 0.323511           | -3.09108                     | T down vs N                            | 27.732  | 11.9284   | 6.88212    | 1         |
| cg19256906                         | NOTCH4                       | 6.10E-06          | 6.10E-06             | 0.235398           | -4.24812                     | T down vs N                            | 43.566  | 19.5968   | 7.19709    | 1         |
| cg19258183                         | VWA5A;VWA5A;VWA5A            | 0.00338272        | 0.00338272           | 0.305548           | -3.27281                     | T down vs N                            | 11.815  | 13.1666   | 17.8298    | 1         |
| cg19260189                         | RFX4;RFX4;RFX4               | 6.98E-05          | 6.98E-05             | 0.329353           | -3.03625                     | T down vs N                            | 28.246  | 11.553    | 6.54428    | 1         |
| cg19260663                         | DFNA5;DFNA5;DFNA5            | 0.00038846        | 0.00038846           | 0.30729            | -3.25426                     | T down vs N                            | 19.963  | 13.0406   | 10.452     | 1         |
| cg19262563                         | SEMA3C                       | 3.54E-05          | 3.54E-05             | 0.231434           | -4.3209                      | T down vs N                            | 32.044  | 20.0597   | 10.016     | 1         |
| cg19263161                         | C7orf50;C7orf50;C7orf50      | 4.70E-05          | 4.70E-05             | 0.257005           | -3.89097                     | T down vs N                            | 30.419  | 17.2895   | 9.09394    | 1         |
| cg19265886                         | OR6C2                        | 6.61E-05          | 6.61E-05             | 0.224081           | -4.46267                     | T down vs N                            | 28.537  | 20.9545   | 11.7485    | 1         |
| cg19267213                         | MGAT5B;MGAT5B                | 0.00020637        | 0.000206374          | 0.263874           | -3.78969                     | T down vs N                            | 22.806  | 16.6248   | 11.6636    | 1         |
| cg19268119                         | FAM124B;FAM124B              | 0.00255727        | 0.00255727           | 0.27478            | -3.63927                     | T down vs N                            | 12.744  | 15.6294   | 19.6233    | 1         |
| cg19269749                         | CYP27C1                      | 1.21E-05          | 1.21E-05             | 0.178661           | -5.5972                      | T down vs N                            | 38.8    | 27.7819   | 11.4565    | 1         |
| cg19270309                         | ENPP7                        | 0.00010382        | 0.000103824          | 0.286134           | -3.49486                     | T down vs N                            | 26.165  | 14.665    | 8.96774    | 1         |
| cg19272150                         | PRG1                         | 2.43E-05          | 2.43E-05             | 0.16625            | -6.01505                     | T down vs N                            | 34.3    | 30.1533   | 14.0658    | 1         |
| cg19272349                         | CSNK1A1L                     | 4.61E-06          | 4.61E-06             | 0.293003           | -3.41293                     | T down vs N                            | 45.649  | 14.1142   | 4.94704    | 1         |
| cg19273756                         | SKA2;SKA2;MIR301A            | 0.00140099        | 0.00140099           | 0.320842           | -3.1168                      | T down vs N                            | 14.86   | 12.1041   | 13.033     | 1         |
| cg19274606                         | C6orf223                     | 1.81E-05          | 1.81E-05             | 0.332801           | -3.0048                      | T down vs N                            | 36.164  | 11.3374   | 5.01599    | 1         |
| cg19274871                         | CMPK2                        | 0.00073139        | 0.000731386          | 0.205167           | -4.87408                     | T down vs N                            | 17.34   | 23.4982   | 21.6824    | 1         |
| cg19275200                         | ZNF177                       | 0.00063257        | 0.000632574          | 0.179638           | -5.56676                     | T down vs N                            | 17.923  | 27.6063   | 24.6446    | 1         |
| cg19275235                         | SFRS14;SFRS14                | 0.00011138        | 0.000111379          | 0.298649           | -3.34841                     | T down vs N                            | 25.808  | 13.6787   | 8.48036    | 1         |
| TCF7L2;TCF7L2;TCF7L2;TCF7L2;TCF7L2 |                              |                   |                      |                    |                              |                                        |         |           |            |           |
| cg19279080                         | ;TCF7L2                      | 0.00209036        | 0.00209036           | 0.188465           | -5.30602                     | T down vs N                            | 13.434  | 26.0851   | 31.0677    | 1         |
| cg19280206                         | PIGZ                         | 6.32E-06          | 6.32E-06             | 3.06277            | 3.06277                      | T up vs N                              | 43.313  | 11.7346   | 4.33481    | 1         |
| cg19281083                         | LRRRC8E;LRRRC8E              | 2.95E-05          | 2.95E-05             | 11.3668            | 11.3668                      | T up vs N                              | 33.127  | 55.3381   | 26.7276    | 1         |
| cg19283806                         | CCDC102B                     | 0.0015073         | 0.0015073            | 0.232064           | -4.30916                     | T down vs N                            | 14.594  | 19.9852   | 21.9114    | 1         |
| cg19283928                         | CLEC4G                       | 0.00016867        | 0.000168668          | 0.282806           | -3.53599                     | T down vs N                            | 23.762  | 14.9404   | 10.0601    | 1         |
| cg19284039                         | ASCL2                        | 0.00247723        | 0.00247723           | 3.08086            | 3.08086                      | T up vs N                              | 12.851  | 11.8584   | 14.764     | 1         |
| cg19284751                         | MARCO;MARCO                  | 0.00012234        | 0.000122335          | 0.204894           | -4.88057                     | T down vs N                            | 25.336  | 23.5377   | 14.8645    | 1         |
| cg19285777                         | GCNT3                        | 0.00277523        | 0.00277523           | 0.29007            | -3.44745                     | T down vs N                            | 12.469  | 14.3465   | 18.4098    | 1         |

| Probeset ID | UCSC_REFGENE_NAME                       | p-value<br>(Type) | p-value (T vs.<br>N) | Ratio (T<br>vs. N) | Fold-<br>Change (T<br>vs. N) | Fold-Change (T vs.<br>N) (Description) | F(Type) | SS (Type) | SS (Error) | F (Error) |
|-------------|-----------------------------------------|-------------------|----------------------|--------------------|------------------------------|----------------------------------------|---------|-----------|------------|-----------|
| cg19286437  | LDB3;LDB3;LDB3;LDB3;LDB3                | 0.00044569        | 0.000445689          | 3.3136             | 3.3136                       | T up vs N                              | 19.375  | 13.4431   | 11.1016    | 1         |
| cg19286473  | FOXR2;FOXR2                             | 0.00081092        | 0.000810916          | 0.264208           | -3.7849                      | T down vs N                            | 16.932  | 16.5932   | 15.6799    | 1         |
| cg19289461  | 1-Sep                                   | 0.00043946        | 0.000439455          | 0.203786           | -4.90711                     | T down vs N                            | 19.435  | 23.699    | 19.5108    | 1         |
| cg19292625  | AASDHPPT                                | 4.84E-05          | 4.84E-05             | 0.260604           | -3.83724                     | T down vs N                            | 30.254  | 16.9374   | 8.95733    | 1         |
| cg19296405  | KIAA1683;KIAA1683;KIAA1683              | 0.00028229        | 0.000282291          | 0.307357           | -3.25354                     | T down vs N                            | 21.369  | 13.0358   | 9.76054    | 1         |
| cg19296556  | ATP8B3                                  | 5.90E-05          | 5.90E-05             | 0.296988           | -3.36714                     | T down vs N                            | 30.453  | 12.9932   | 6.39988    | 1         |
| cg19300422  | TRPV3                                   | 0.00022007        | 0.00022007           | 0.291522           | -3.43027                     | T down vs N                            | 22.506  | 14.2309   | 10.1169    | 1         |
| cg19301897  | SLC9A3                                  | 1.86E-06          | 1.86E-06             | 0.124839           | -8.01029                     | T down vs N                            | 52.902  | 40.5501   | 12.2642    | 1         |
| cg19302605  | OR2L13                                  | 0.00024571        | 0.000245712          | 0.292106           | -3.42342                     | T down vs N                            | 21.998  | 14.1848   | 10.317     | 1         |
| cg19304093  | SLC30A2;SLC30A2                         | 2.36E-05          | 2.36E-05             | 0.314181           | -3.18288                     | T down vs N                            | 34.484  | 12.555    | 5.82539    | 1         |
| cg19305095  | REEP6                                   | 8.13E-06          | 8.13E-06             | 0.205568           | -4.86457                     | T down vs N                            | 41.507  | 23.4403   | 9.03568    | 1         |
| cg19305681  | CYP26C1                                 | 7.28E-05          | 7.28E-05             | 4.49497            | 4.49497                      | T up vs N                              | 28.021  | 21.1571   | 12.0809    | 1         |
| cg19306847  | BRMS1;BRMS1                             | 0.00083709        | 0.000837087          | 0.332489           | -3.00762                     | T down vs N                            | 16.808  | 11.3567   | 10.8111    | 1         |
| cg19307003  | CD6                                     | 0.00407529        | 0.00407529           | 3.65763            | 3.65763                      | T up vs N                              | 11.216  | 15.7513   | 22.4693    | 1         |
| cg19307090  | MRPL11;MRPL11;MRPL11                    | 0.00082025        | 0.000820246          | 0.317508           | -3.14952                     | T down vs N                            | 16.887  | 12.3276   | 11.68      | 1         |
| cg19310148  | NFE2L3                                  | 4.15E-05          | 4.15E-05             | 0.305157           | -3.277                       | T down vs N                            | 31.132  | 13.1951   | 6.7814     | 1         |
| cg19310458  | CTNNA2;CTNNA2                           | 1.66E-05          | 1.66E-05             | 0.162659           | -6.14783                     | T down vs N                            | 36.682  | 30.8916   | 13.4744    | 1         |
| cg19310786  | CTS2                                    | 0.00313012        | 0.00313012           | 5.18099            | 5.18099                      | T up vs N                              | 12.069  | 25.345    | 33.5989    | 1         |
| cg19312427  | NEK7                                    | 0.00018741        | 0.000187405          | 0.305052           | -3.27813                     | T down vs N                            | 23.26   | 13.2027   | 9.08199    | 1         |
| cg19318393  | CAPN2;CAPN2                             | 0.00031056        | 0.000310562          | 9.73021            | 9.73021                      | T up vs N                              | 20.943  | 48.4858   | 37.043     | 1         |
| cg19319808  | RHOU                                    | 0.00064583        | 0.000645831          | 0.29384            | -3.40321                     | T down vs N                            | 17.839  | 14.0486   | 12.6005    | 1         |
| cg19321615  | CCDC90B                                 | 0.00011537        | 0.000115368          | 0.241514           | -4.14055                     | T down vs N                            | 25.63   | 18.9079   | 11.8036    | 1         |
| cg19321696  | NPS                                     | 0.00010967        | 0.000109674          | 0.212553           | -4.7047                      | T down vs N                            | 25.886  | 22.4605   | 13.8828    | 1         |
| cg19321979  | BCAN;BCAN                               | 2.15E-05          | 2.15E-05             | 0.157849           | -6.33516                     | T down vs N                            | 35.076  | 31.9212   | 14.5609    | 1         |
| cg19322228  | ADIPOR1;ADIPOR1                         | 0.00011099        | 0.000110994          | 0.223163           | -4.48102                     | T down vs N                            | 25.825  | 21.0697   | 13.0537    | 1         |
| cg19323245  | TTK;TTK                                 | 0.00070327        | 0.00070327           | 0.194228           | -5.1486                      | T down vs N                            | 17.496  | 25.152    | 23.0011    | 1         |
| cg19323951  | SLC22A20                                | 0.0049398         | 0.0049398            | 0.322035           | -3.10525                     | T down vs N                            | 10.613  | 12.0252   | 18.1292    | 1         |
| cg19325793  | HLA-DPB2                                | 0.00038331        | 0.000383307          | 0.330337           | -3.02721                     | T down vs N                            | 20.02   | 11.491    | 9.1835     | 1         |
| cg19326244  | LOC100134259                            | 0.00058086        | 0.000580861          | 0.325712           | -3.0702                      | T down vs N                            | 18.27   | 11.7855   | 10.3209    | 1         |
| cg19328828  | GPR81                                   | 6.70E-05          | 6.70E-05             | 0.262284           | -3.81266                     | T down vs N                            | 28.464  | 16.7759   | 9.42997    | 1         |
| cg19331215  | CST9L                                   | 0.0016496         | 0.0016496            | 0.326859           | -3.05943                     | T down vs N                            | 14.269  | 11.7117   | 13.1328    | 1         |
| cg19333255  | KIR2DL3;KIR2DL3                         | 6.04E-05          | 6.04E-05             | 0.131138           | -7.62557                     | T down vs N                            | 29.03   | 38.6544   | 21.3045    | 1         |
| cg19333883  | ADAMTS15                                | 0.00010077        | 0.000100773          | 3.54007            | 3.54007                      | T up vs N                              | 26.317  | 14.9677   | 9.09983    | 1         |
| cg19333980  | C20orf30;C20orf30;C20orf30;C20orf30     | 0.00217197        | 0.00217197           | 0.299966           | -3.33371                     | T down vs N                            | 13.301  | 13.5793   | 16.3343    | 1         |
| cg19335617  | C7orf58;C7orf58                         | 7.08E-05          | 7.08E-05             | 0.201855           | -4.95406                     | T down vs N                            | 28.169  | 23.9836   | 13.6227    | 1         |
| cg19338056  | LOC389705                               | 0.0003113         | 0.000311297          | 0.123802           | -8.07744                     | T down vs N                            | 20.932  | 40.8761   | 31.2449    | 1         |
| cg19339848  | MTO1;MTO1;MTO1                          | 0.00207098        | 0.00207098           | 0.218026           | -4.58662                     | T down vs N                            | 13.807  | 20.451    | 22.2178    | 1         |
| cg19340889  | NR2E1                                   | 0.00010863        | 0.000108626          | 0.329607           | -3.03392                     | T down vs N                            | 25.935  | 11.537    | 7.11763    | 1         |
| cg19343707  | TNFSF8                                  | 1.34E-06          | 1.34E-06             | 0.15808            | -6.32591                     | T down vs N                            | 55.754  | 31.8707   | 9.14609    | 1         |
| cg19344322  | FLJ23834                                | 0.00233809        | 0.00233809           | 0.321382           | -3.11156                     | T down vs N                            | 13.048  | 12.0684   | 14.7986    | 1         |
| cg19345602  | PATE1                                   | 2.38E-05          | 2.38E-05             | 0.282719           | -3.53708                     | T down vs N                            | 34.423  | 14.9478   | 6.94784    | 1         |
| cg19346193  | BCCIP;BCCIP;UROS;BCCIP                  | 0.00067229        | 0.000672287          | 0.184617           | -5.41663                     | T down vs N                            | 17.677  | 26.734    | 24.1979    | 1         |
| cg19349369  | SERPINB1                                | 3.71E-05          | 3.71E-05             | 29.4841            | 29.4841                      | T up vs N                              | 31.783  | 107.247   | 53.9893    | 1         |
| cg19349543  | P2RY6;P2RY6;P2RY6;P2RY6                 | 0.00020284        | 0.000202844          | 0.191259           | -5.22852                     | T down vs N                            | 22.887  | 25.6271   | 17.916     | 1         |
| cg19350357  | RBM43                                   | 3.35E-05          | 3.35E-05             | 0.291851           | -3.42641                     | T down vs N                            | 32.374  | 14.2049   | 7.02032    | 1         |
| cg19350767  | OR9Q2                                   | 0.00023375        | 0.000233745          | 0.313766           | -3.18708                     | T down vs N                            | 22.228  | 12.5837   | 9.05806    | 1         |
| cg19360316  | DHRS7B                                  | 7.32E-06          | 7.32E-06             | 0.279445           | -3.57852                     | T down vs N                            | 42.252  | 15.2247   | 5.76534    | 1         |
| cg19362611  | FAM50B                                  | 0.00031947        | 0.000319472          | 3.27869            | 3.27869                      | T up vs N                              | 20.817  | 13.2065   | 10.1505    | 1         |
| cg19363755  | TMEM184A                                | 0.00048214        | 0.00048214           | 0.240668           | -4.15511                     | T down vs N                            | 19.043  | 19.0015   | 15.9651    | 1         |
| cg19364068  | IGFL1                                   | 4.23E-07          | 4.23E-07             | 0.259368           | -3.85552                     | T down vs N                            | 66.708  | 17.0573   | 4.09125    | 1         |
| cg19366479  | NR1H2                                   | 0.00091991        | 0.000919911          | 0.290389           | -3.44366                     | T down vs N                            | 16.441  | 14.321    | 13.937     | 1         |
| cg19367176  | OR2T11                                  | 0.00085048        | 0.000850484          | 0.160305           | -6.23809                     | T down vs N                            | 16.746  | 31.3895   | 29.992     | 1         |
| cg19369424  | ESR1;ESR1;ESR1;ESR1                     | 1.01E-05          | 1.01E-05             | 0.302061           | -3.31059                     | T down vs N                            | 40.023  | 13.4228   | 5.36603    | 1         |
| cg19370451  | CRNN                                    | 0.00142686        | 0.00142686           | 0.212606           | -4.70353                     | T down vs N                            | 14.793  | 22.4533   | 24.2855    | 1         |
| cg19371339  | LCE2B                                   | 0.00237632        | 0.00237632           | 0.241243           | -4.14519                     | T down vs N                            | 12.993  | 18.9378   | 23.3211    | 1         |
| cg19371349  | HMGB2;HMGB2;HMGB2                       | 1.03E-05          | 1.03E-05             | 0.190479           | -5.24992                     | T down vs N                            | 39.841  | 25.7539   | 10.3428    | 1         |
| cg19375053  | DMKN;DMKN;DMKN;DMKN                     | 1.65E-05          | 1.65E-05             | 0.289399           | -3.45543                     | T down vs N                            | 36.729  | 14.4002   | 6.27313    | 1         |
| cg19376858  | TNXB;TNXB;TNXA;STK19;STK19              | 0.00090432        | 0.00090432           | 0.268951           | -3.71815                     | T down vs N                            | 16.507  | 16.1525   | 15.6565    | 1         |
| cg19377421  | ISG20L2;C1orf66;C1orf66                 | 0.0001505         | 0.000150503          | 0.204298           | -4.89482                     | T down vs N                            | 24.313  | 23.6243   | 15.5468    | 1         |
| cg19378389  | ABCA4                                   | 0.00186139        | 0.00186139           | 0.316968           | -3.15489                     | T down vs N                            | 14.197  | 11.6369   | 12.2949    | 1         |
| cg19378631  | COMMD3                                  | 0.00011045        | 0.000110445          | 0.148772           | -6.72168                     | T down vs N                            | 25.85   | 34.0021   | 21.0455    | 1         |
| cg19378892  | OR10J3                                  | 0.00017457        | 0.000174565          | 0.190584           | -5.24703                     | T down vs N                            | 23.597  | 25.7367   | 17.4506    | 1         |
| cg19380156  | KIR3DP1                                 | 0.00030837        | 0.000308373          | 0.288036           | -3.47179                     | T down vs N                            | 20.974  | 14.5101   | 11.0691    | 1         |
| cg19384106  | DAXX;DAXX;DAXX;DAXX                     | 3.37E-05          | 3.37E-05             | 0.186562           | -5.36016                     | T down vs N                            | 32.333  | 26.4034   | 13.0659    | 1         |
| cg19384546  | TNP1                                    | 0.00035726        | 0.000357261          | 0.291524           | -3.43025                     | T down vs N                            | 20.326  | 14.2308   | 11.2021    | 1         |
| cg19388050  | KCNQ1;KCNQ1                             | 0.0001265         | 0.0001265            | 0.259508           | -3.85345                     | T down vs N                            | 25.169  | 17.0438   | 10.8349    | 1         |
| cg19389293  | C18orf1;C18orf1;C18orf1;C18orf1;C18orf1 | 0.00026351        | 0.000263513          | 3.41209            | 3.41209                      | T up vs N                              | 21.68   | 14.1085   | 10.4123    | 1         |
| cg19390244  | PLXNA4                                  | 0.00049792        | 0.000497918          | 4.39527            | 4.39527                      | T up vs N                              | 18.908  | 20.5303   | 17.3727    | 1         |
| cg19391384  | 7-Mar                                   | 0.00140873        | 0.00140873           | 0.236253           | -4.23274                     | T down vs N                            | 14.84   | 19.4986   | 21.0234    | 1         |
| cg19391498  | GALM                                    | 2.61E-05          | 2.61E-05             | 0.307078           | -3.2565                      | T down vs N                            | 33.86   | 13.0559   | 6.16943    | 1         |

| Probeset ID | UCSC_REFGENE_NAME                          | p-value<br>(Type) | p-value (T vs.<br>N) | Ratio (T<br>vs. N) | Fold-<br>Change (T<br>vs. N) | Fold-Change (T vs.<br>N) (Description) | F(Type) | SS (Type) | SS (Error) | F (Error) |
|-------------|--------------------------------------------|-------------------|----------------------|--------------------|------------------------------|----------------------------------------|---------|-----------|------------|-----------|
| cg19391560  | MFS6L                                      | 4.45E-05          | 4.45E-05             | 4.38845            | 4.38845                      | T up vs N                              | 30.731  | 20.4873   | 10.6667    | 1         |
| cg19392335  | GLYATL1                                    | 0.00047632        | 0.000476323          | 0.193809           | -5.15971                     | T down vs N                            | 19.094  | 25.2183   | 21.1318    | 1         |
| cg19393762  | TNNT1;TNNT1;TNNT1                          | 0.00140848        | 0.00140848           | 0.31123            | -3.21306                     | T down vs N                            | 14.84   | 12.7606   | 13.7578    | 1         |
| cg19395671  | NCRA00171                                  | 0.0008976         | 0.000897601          | 0.32259            | -3.09991                     | T down vs N                            | 16.536  | 11.9887   | 11.6002    | 1         |
| cg19400725  | RILP                                       | 0.0035904         | 0.0035904            | 3.82857            | 3.82857                      | T up vs N                              | 11.622  | 16.8804   | 23.2391    | 1         |
| cg19402039  | DSP;DSP                                    | 0.00059698        | 0.000596982          | 0.254265           | -3.9329                      | T down vs N                            | 18.158  | 17.5634   | 15.4757    | 1         |
| cg19402335  | OR101                                      | 6.32E-06          | 6.32E-06             | 0.227762           | -4.39056                     | T down vs N                            | 43.31   | 20.5006   | 7.57352    | 1         |
| cg19402371  | TMEM190                                    | 0.00368588        | 0.00368588           | 3.2128             | 3.2128                       | T up vs N                              | 11.537  | 12.7588   | 17.6937    | 1         |
| cg19402939  | CHRD                                       | 0.00185986        | 0.00185986           | 3.60143            | 3.60143                      | T up vs N                              | 13.843  | 15.3774   | 17.7741    | 1         |
| cg19403029  | SOX7                                       | 0.0059955         | 0.0059955            | 3.01397            | 3.01397                      | T up vs N                              | 10.021  | 11.4003   | 18.2021    | 1         |
| cg19406106  | FARSA                                      | 0.00046159        | 0.000461588          | 0.178431           | -5.6044                      | T down vs N                            | 19.226  | 27.8234   | 23.1543    | 1         |
| cg19408398  | FIP1L1;FIP1L1;FIP1L1                       | 0.00707424        | 0.00707424           | 0.323247           | -3.09361                     | T down vs N                            | 9.5277  | 11.9457   | 20.0606    | 1         |
| cg19408740  | IGSF8                                      | 0.0009129         | 0.0009129            | 3.03763            | 3.03763                      | T up vs N                              | 16.47   | 11.5625   | 11.2322    | 1         |
| cg19409133  | SNHG3-RCC1;RCC1;SNHG3-RCC1;RCC1;SNHG3-RCC1 | 0.00016387        | 0.00016387           | 0.281221           | -3.55592                     | T down vs N                            | 23.901  | 15.0737   | 10.0909    | 1         |
| cg19410791  | CD8A                                       | 6.67E-05          | 6.67E-05             | 6.02087            | 6.02087                      | T up vs N                              | 28.488  | 30.1858   | 16.9535    | 1         |
| cg19412791  | TRIM7;TRIM7                                | 0.00090245        | 0.000902452          | 3.00854            | 3.00854                      | T up vs N                              | 16.515  | 11.363    | 11.0087    | 1         |
| cg19413725  | FAM160A1                                   | 0.0001821         | 0.000182099          | 0.32526            | -3.07446                     | T down vs N                            | 23.396  | 11.8147   | 8.07981    | 1         |
| cg19414598  | DMC1                                       | 0.00071325        | 0.000713248          | 11.2942            | 11.2942                      | T up vs N                              | 17.44   | 55.0465   | 50.5014    | 1         |
| cg19414711  | SDN1                                       | 2.41E-06          | 2.41E-06             | 0.136494           | -7.32632                     | T down vs N                            | 50.75   | 37.1459   | 11.7111    | 1         |
| cg19416605  | BTNL2                                      | 1.09E-05          | 1.09E-05             | 0.209673           | -4.76934                     | T down vs N                            | 39.475  | 22.8581   | 9.26492    | 1         |
| cg19418273  | CREB3L2                                    | 3.97E-05          | 3.97E-05             | 0.153531           | -6.51335                     | T down vs N                            | 31.385  | 32.8877   | 16.7659    | 1         |
| cg19418958  | TEX15                                      | 7.43E-05          | 7.43E-05             | 0.251531           | -3.97565                     | T down vs N                            | 27.91   | 17.8418   | 10.2283    | 1         |
| cg19420129  | RASIP1                                     | 1.81E-05          | 1.81E-05             | 0.259298           | -3.85657                     | T down vs N                            | 36.14   | 17.0642   | 7.55468    | 1         |
| cg19420720  | P4HB                                       | 6.07E-05          | 6.07E-05             | 0.188504           | -5.30494                     | T down vs N                            | 29.002  | 26.0787   | 14.3871    | 1         |
| cg19421125  | LAG3                                       | 1.51E-05          | 1.51E-05             | 6.51038            | 6.51038                      | T up vs N                              | 37.315  | 32.8717   | 14.0949    | 1         |
| cg19421752  | SLC6A19;SLC6A18                            | 2.05E-06          | 2.05E-06             | 0.276833           | -3.61228                     | T down vs N                            | 52.117  | 15.4497   | 4.74307    | 1         |
| cg19423622  | PTPRN2;PTPRN2;PTPRN2                       | 0.0002287         | 0.000228698          | 5.77719            | 5.77719                      | T up vs N                              | 22.328  | 28.8124   | 20.6464    | 1         |
| cg19424531  | CYP7B1                                     | 7.75E-05          | 7.75E-05             | 4.07234            | 4.07234                      | T up vs N                              | 27.684  | 18.4684   | 10.6738    | 1         |
| cg19428722  | HPSE2;HPSE2;HPSE2;HPSE2                    | 0.00385987        | 0.00385987           | 5.08711            | 5.08711                      | T up vs N                              | 11.389  | 24.7846   | 34.8177    | 1         |
| cg19430423  | CYP2S1                                     | 0.00017194        | 0.000171935          | 0.331658           | -3.01515                     | T down vs N                            | 23.67   | 11.4084   | 7.71164    | 1         |
| cg19430577  | STAP4                                      | 0.0024029         | 0.0024029            | 9.47109            | 9.47109                      | T up vs N                              | 12.955  | 47.3422   | 58.4708    | 1         |
| cg19431623  | PLXDC2                                     | 0.00269686        | 0.00269686           | 0.293668           | -3.40521                     | T down vs N                            | 12.565  | 14.0621   | 17.9071    | 1         |
| cg19432505  | ASB5                                       | 0.00012055        | 0.00012055           | 0.126393           | -7.91184                     | T down vs N                            | 25.409  | 40.0695   | 25.2314    | 1         |
| cg19434795  | SNORD115-44                                | 0.00107062        | 0.00107062           | 0.320834           | -3.11688                     | T down vs N                            | 15.861  | 12.1047   | 12.2111    | 1         |
| cg19435526  | LRR8E                                      | 2.15E-05          | 2.15E-05             | 0.252141           | -3.96603                     | T down vs N                            | 35.073  | 17.7792   | 8.11073    | 1         |
| cg19436270  | CSMD3;CSMD3;CSMD3                          | 3.44E-05          | 3.44E-05             | 0.276607           | -3.61524                     | T down vs N                            | 32.221  | 15.4694   | 7.68162    | 1         |
| cg19437183  | LOC100192378                               | 0.00410846        | 0.00410846           | 0.30918            | -3.23436                     | T down vs N                            | 11.191  | 12.9054   | 18.452     | 1         |
| cg19439123  | RAI1                                       | 0.00057015        | 0.00057015           | 0.269166           | -3.71518                     | T down vs N                            | 18.347  | 16.1329   | 14.0693    | 1         |
| cg19446264  | CGB8                                       | 0.00017613        | 0.000176131          | 0.268974           | -3.71783                     | T down vs N                            | 23.555  | 16.1504   | 10.9705    | 1         |
| cg19449565  | HDAC4                                      | 0.00108846        | 0.00108846           | 4.02639            | 4.02639                      | T up vs N                              | 15.798  | 18.1712   | 18.4034    | 1         |
| cg19449626  | H2AFV;H2AFV;H2AFV;H2AFV;H2AFV              | 0.00015643        | 0.000156432          | 0.26738            | -3.73999                     | T down vs N                            | 24.125  | 16.2969   | 10.8082    | 1         |
| cg19450111  | BCL11B;BCL11B                              | 7.98E-06          | 7.98E-06             | 0.245023           | -4.08124                     | T down vs N                            | 41.642  | 18.5259   | 7.11819    | 1         |
| cg19453059  | DEFB118                                    | 7.67E-05          | 7.67E-05             | 0.301412           | -3.31772                     | T down vs N                            | 27.744  | 13.471    | 7.76868    | 1         |
| cg19457477  | MAP4K1;MAP4K1;MAP4K1;MAP4K1;E              | 0.00429949        | 0.00429949           | 0.264896           | -3.77507                     | T down vs N                            | 11.047  | 16.5284   | 23.9396    | 1         |
| cg19457763  | ASAM                                       | 2.14E-05          | 2.14E-05             | 8.81429            | 8.81429                      | T up vs N                              | 35.092  | 44.3638   | 20.2276    | 1         |
| cg19460508  | PARVB;PARVB                                | 2.21E-05          | 2.21E-05             | 0.133291           | -7.50236                     | T down vs N                            | 34.883  | 38.0369   | 17.4468    | 1         |
| cg19461907  | OCEL1                                      | 9.96E-06          | 9.96E-06             | 0.327794           | -3.05069                     | T down vs N                            | 40.097  | 11.652    | 4.6495     | 1         |
| cg19463256  | CCDC8                                      | 0.00272643        | 0.00272643           | 4.94188            | 4.94188                      | T up vs N                              | 12.528  | 23.9098   | 30.5364    | 1         |
| cg19465320  | STAT5B                                     | 5.08E-05          | 5.08E-05             | 0.251259           | -3.97995                     | T down vs N                            | 29.984  | 17.8697   | 9.53547    | 1         |
| cg19470841  | ACCN1;ACCN1                                | 5.80E-06          | 5.80E-06             | 0.231682           | -4.31626                     | T down vs N                            | 43.938  | 20.0303   | 7.29409    | 1         |
| cg19472254  | ATP8B3                                     | 0.00046461        | 0.000464609          | 0.326915           | -3.0589                      | T down vs N                            | 19.199  | 11.7081   | 9.75732    | 1         |
| cg19474047  | ANGPTL6                                    | 0.00090925        | 0.000909252          | 0.274498           | -3.64302                     | T down vs N                            | 16.486  | 15.6543   | 15.1928    | 1         |
| cg19474517  | BEX2;BEX2;BEX2;BEX2                        | 7.39E-06          | 7.39E-06             | 0.322848           | -3.09744                     | T down vs N                            | 42.181  | 11.9718   | 4.54116    | 1         |
| cg19474983  | ORSH1                                      | 4.56E-05          | 4.56E-05             | 0.28582            | -3.4987                      | T down vs N                            | 30.591  | 14.6907   | 7.6836     | 1         |
| cg19475241  | ONECUT3                                    | 1.24E-05          | 1.24E-05             | 0.285607           | -3.50131                     | T down vs N                            | 38.623  | 14.7082   | 6.09299    | 1         |
| cg19475575  | C21orf70                                   | 2.59E-05          | 2.59E-05             | 0.250059           | -3.99906                     | T down vs N                            | 33.908  | 17.9939   | 8.49061    | 1         |
| cg19477205  | MIR154                                     | 0.00075044        | 0.000750444          | 0.26082            | -3.83406                     | T down vs N                            | 17.238  | 16.9166   | 15.7019    | 1         |
| cg19480117  | EBF3                                       | 2.30E-06          | 2.30E-06             | 0.199269           | -5.01835                     | T down vs N                            | 51.159  | 24.3716   | 7.62219    | 1         |
| cg19481439  | GGT7                                       | 1.08E-05          | 1.08E-05             | 3.38309            | 3.38309                      | T up vs N                              | 39.533  | 13.9129   | 5.63095    | 1         |
| cg19482843  | EIF2C2;EIF2C2                              | 0.001702          | 0.001702             | 3.71099            | 3.71099                      | T up vs N                              | 14.529  | 15.1578   | 15.6491    | 1         |
| cg19483007  | WWTR1;WWTR1;WWTR1                          | 3.30E-05          | 3.30E-05             | 0.293861           | -3.40297                     | T down vs N                            | 32.464  | 14.047    | 6.92304    | 1         |
| cg19483663  | XRCC4;XRCC4;XRCC4                          | 4.40E-05          | 4.40E-05             | 0.221407           | -4.51656                     | T down vs N                            | 30.791  | 21.2922   | 11.0641    | 1         |
| cg19486673  | LILRA2;LILRA2                              | 0.00024733        | 0.000247333          | 0.249457           | -4.00871                     | T down vs N                            | 21.968  | 18.0565   | 13.151     | 1         |
| cg19489188  | SIRT6;ANKRD24                              | 0.00133679        | 0.00133679           | 0.325701           | -3.0703                      | T down vs N                            | 15.032  | 11.7862   | 12.5453    | 1         |
| cg19489423  | FAM129C;FAM129C                            | 0.00086735        | 0.000867346          | 0.130842           | -7.64282                     | T down vs N                            | 16.669  | 38.7404   | 37.1855    | 1         |
| cg19489494  | GUCA1A                                     | 0.00267322        | 0.00267322           | 3.26909            | 3.26909                      | T up vs N                              | 12.594  | 13.1414   | 16.6953    | 1         |
| cg19495308  | TRIM10;TRIM10                              | 7.27E-05          | 7.27E-05             | 0.278671           | -3.58846                     | T down vs N                            | 28.026  | 15.2909   | 8.72968    | 1         |
| cg19495650  | JMJD1C                                     | 1.30E-05          | 1.30E-05             | 0.328009           | -3.04869                     | T down vs N                            | 38.305  | 11.6383   | 4.86135    | 1         |
| cg19496978  | ZNF697                                     | 2.57E-05          | 2.57E-05             | 0.332777           | -3.00501                     | T down vs N                            | 33.968  | 11.3389   | 5.34098    | 1         |

| Probeset ID                         | UCSC_REFGENE_NAME          | p-value<br>(Type) | p-value (T vs.<br>N) | Ratio (T<br>vs. N) | Fold-<br>Change (T<br>vs. N) | Fold-Change (T vs.<br>N) (Description) | F(Type) | SS (Type) | SS (Error) | F (Error) |
|-------------------------------------|----------------------------|-------------------|----------------------|--------------------|------------------------------|----------------------------------------|---------|-----------|------------|-----------|
| LRRFIP1;LRRFIP1;LRRFIP1;LRRFIP1;LRR |                            |                   |                      |                    |                              |                                        |         |           |            |           |
| cg19497511                          | FIP1                       | 0.00020878        | 0.000208778          | 0.276695           | -3.61409                     | T down vs N                            | 22.752  | 15.4618   | 10.8734    | 1         |
| cg19498228                          | NPHS1                      | 8.27E-06          | 8.27E-06             | 0.237123           | -4.21721                     | T down vs N                            | 41.386  | 19.3994   | 7.4999     | 1         |
| cg19500599                          | CXorf61                    | 0.00075965        | 0.000759646          | 0.317001           | -3.15457                     | T down vs N                            | 17.189  | 12.362    | 11.5066    | 1         |
| MADD;MADD;MADD;MADD;MADD;M          |                            |                   |                      |                    |                              |                                        |         |           |            |           |
| cg19501536                          | ADD;MADD;MADD;MADD;MADD    | 2.46E-05          | 2.46E-05             | 0.185001           | -5.40537                     | T down vs N                            | 34.24   | 26.6682   | 12.4617    | 1         |
| cg19502207                          | GCH1;GCH1;GCH1;GCH1        | 0.00084739        | 0.000847386          | 0.291088           | -3.43539                     | T down vs N                            | 16.76   | 14.2654   | 13.6187    | 1         |
| cg19503640                          | LPCAT1                     | 0.00105315        | 0.00105315           | 0.162804           | -6.14236                     | T down vs N                            | 15.923  | 30.8614   | 31.0106    | 1         |
| cg19504089                          | LOC728989                  | 2.62E-06          | 2.62E-06             | 0.271106           | -3.68859                     | T down vs N                            | 50.077  | 15.9568   | 5.09833    | 1         |
| cg19505458                          | KIAA1217;KIAA1217;KIAA1217 | 7.23E-05          | 7.23E-05             | 0.211357           | -4.73134                     | T down vs N                            | 28.057  | 22.6245   | 12.9023    | 1         |
| cg19506380                          | MTDH                       | 5.92E-05          | 5.92E-05             | 0.295973           | -3.37869                     | T down vs N                            | 29.141  | 13.8832   | 7.62272    | 1         |
| cg19506407                          | NLGN4X;NLGN4X              | 6.51E-05          | 6.51E-05             | 0.319506           | -3.12983                     | T down vs N                            | 28.619  | 12.1932   | 6.81675    | 1         |
| cg19507591                          | CDCAS5;ZFPL1               | 0.00314062        | 0.00314062           | 0.293801           | -3.40366                     | T down vs N                            | 12.058  | 14.0517   | 18.6449    | 1         |
| cg19508285                          | FAM19A4;FAM19A4            | 2.67E-05          | 2.67E-05             | 0.221658           | -4.51146                     | T down vs N                            | 33.738  | 21.2603   | 10.0826    | 1         |
| cg19508561                          | LCK;LCK                    | 1.53E-05          | 1.53E-05             | 3.66123            | 3.66123                      | T up vs N                              | 37.248  | 15.7753   | 6.77624    | 1         |
| cg19509436                          | C1orf101;C1orf101          | 0.00114967        | 0.00114967           | 0.263409           | -3.79638                     | T down vs N                            | 15.592  | 16.6688   | 17.1049    | 1         |
| cg19509663                          | AFAP1;AFAP1                | 0.00235676        | 0.00235676           | 0.300939           | -3.32293                     | T down vs N                            | 13.021  | 13.5063   | 16.5965    | 1         |
| cg19510180                          | TMPSR511B                  | 0.00034216        | 0.000342161          | 0.305347           | -3.27496                     | T down vs N                            | 20.515  | 13.1812   | 10.2803    | 1         |
| cg19511425                          | TRAPPC2;TRAPPC2;TRAPPC2    | 2.51E-05          | 2.51E-05             | 0.145819           | -6.85783                     | T down vs N                            | 34.118  | 34.7216   | 16.2831    | 1         |
| cg19513232                          | CAMK2A;CAMK2A              | 4.12E-05          | 4.12E-05             | 0.317309           | -3.1515                      | T down vs N                            | 31.176  | 12.3411   | 6.33362    | 1         |
| cg19515035                          | RTKN                       | 0.00023115        | 0.000231151          | 5.30491            | 5.30491                      | T up vs N                              | 22.279  | 26.0785   | 18.7287    | 1         |
| cg19516515                          | RUSC1;RUSC1;C1orf104       | 0.00077176        | 0.000771764          | 6.89793            | 6.89793                      | T up vs N                              | 17.127  | 34.9322   | 32.6338    | 1         |
| cg19519747                          | MIR10B                     | 0.000291          | 0.000290998          | 11.975             | 11.975                       | T up vs N                              | 21.233  | 57.7369   | 43.508     | 1         |
| cg19521511                          | ZNF716                     | 0.00013923        | 0.000139228          | 0.314841           | -3.1762                      | T down vs N                            | 24.694  | 12.5096   | 8.10527    | 1         |
| cg19521646                          | OR111                      | 0.00022157        | 0.000221572          | 0.313775           | -3.187                       | T down vs N                            | 22.475  | 12.5831   | 8.95805    | 1         |
| CLEC7A;CLEC7A;CLEC7A;CLEC7A;CLEC    |                            |                   |                      |                    |                              |                                        |         |           |            |           |
| cg19522467                          | 7A                         | 2.58E-05          | 2.58E-05             | 0.282245           | -3.54302                     | T down vs N                            | 33.946  | 14.9875   | 7.06414    | 1         |
| cg19522940                          | HPGDS                      | 5.46E-08          | 5.46E-08             | 0.152154           | -6.57231                     | T down vs N                            | 90.539  | 33.2047   | 5.86794    | 1         |
| cg19532212                          | TEX14;RAD51C;TEX14;RAD51C  | 2.86E-05          | 2.86E-05             | 0.059949           | -16.6809                     | T down vs N                            | 33.314  | 74.1809   | 35.6274    | 1         |
| cg19532454                          | PRSS42                     | 4.25E-06          | 4.25E-06             | 0.182092           | -5.49174                     | T down vs N                            | 46.271  | 27.1716   | 9.39575    | 1         |
| cg19537184                          | MIR520C;MIR526A1           | 5.07E-06          | 5.07E-06             | 0.269933           | -3.70462                     | T down vs N                            | 44.939  | 16.063    | 5.71897    | 1         |
| cg19537932                          | OR6C68                     | 1.44E-05          | 1.44E-05             | 0.180442           | -5.54194                     | T down vs N                            | 37.619  | 27.4628   | 11.6804    | 1         |
| cg19538335                          | XAGE3                      | 2.44E-06          | 2.44E-06             | 0.200154           | -4.99614                     | T down vs N                            | 50.649  | 24.2378   | 7.65669    | 1         |
| cg19539556                          | OR4A16                     | 1.53E-05          | 1.53E-05             | 0.161052           | -6.20918                     | T down vs N                            | 37.245  | 31.2304   | 13.416     | 1         |
| cg19541865                          | ACPP;ACPP                  | 9.39E-06          | 9.39E-06             | 0.239413           | -4.17688                     | T down vs N                            | 40.503  | 19.1412   | 7.56135    | 1         |
| cg19541976                          | MTMR2;MTMR2;MTMR2;MTMR2    | 2.98E-05          | 2.98E-05             | 0.205386           | -4.86887                     | T down vs N                            | 33.067  | 23.4665   | 11.3546    | 1         |
| cg19547155                          | LAIR2;LAIR2                | 0.00244953        | 0.00244953           | 0.272812           | -3.66553                     | T down vs N                            | 13.205  | 14.8742   | 16.8961    | 1         |
| cg19547549                          | SRPX2;SRPX2                | 7.17E-05          | 7.17E-05             | 0.320268           | -3.12239                     | T down vs N                            | 28.101  | 12.1423   | 6.91349    | 1         |
| cg19550533                          | RTN4RL1                    | 1.40E-05          | 1.40E-05             | 5.17906            | 5.17906                      | T up vs N                              | 37.786  | 25.3335   | 10.7271    | 1         |
| cg19554569                          | OR51B5                     | 1.08E-05          | 1.08E-05             | 0.19303            | -5.18055                     | T down vs N                            | 39.55   | 25.3423   | 10.2524    | 1         |
| cg19554939                          | KIR3DL2                    | 6.52E-06          | 6.52E-06             | 0.233542           | -4.28189                     | T down vs N                            | 43.088  | 19.8119   | 7.35682    | 1         |
| LRRC17;FBXL13;LRRC17;LRRC17;LRRC    |                            |                   |                      |                    |                              |                                        |         |           |            |           |
| cg19561297                          | 17;FBXL13                  | 1.11E-05          | 1.11E-05             | 0.198224           | -5.04479                     | T down vs N                            | 39.342  | 24.5307   | 9.97644    | 1         |
| cg19561453                          | HSF2;HSF2                  | 1.33E-05          | 1.33E-05             | 0.136823           | -7.30871                     | T down vs N                            | 38.148  | 37.0562   | 15.5421    | 1         |
| cg19562321                          | SLC36A2;SLC36A2            | 0.00029463        | 0.000294628          | 0.230672           | -4.33516                     | T down vs N                            | 21.177  | 20.1502   | 15.2241    | 1         |
| cg19563510                          | MAFG;MAFG                  | 3.59E-05          | 3.59E-05             | 6.72453            | 6.72453                      | T up vs N                              | 31.962  | 34.0173   | 17.0288    | 1         |
| cg19565262                          | NAT8                       | 0.00239196        | 0.00239196           | 0.319376           | -3.1311                      | T down vs N                            | 12.97   | 12.2019   | 15.052     | 1         |
| cg19565396                          | CDYL                       | 1.35E-05          | 1.35E-05             | 0.248317           | -4.02711                     | T down vs N                            | 38.066  | 18.1759   | 7.63972    | 1         |
| cg19567866                          | SPOCK1                     | 3.55E-05          | 3.55E-05             | 0.306463           | -3.26303                     | T down vs N                            | 32.042  | 13.1002   | 6.54151    | 1         |
| cg19568591                          | FRZB                       | 0.00130187        | 0.00130187           | 7.89882            | 7.89882                      | T up vs N                              | 15.129  | 40.0057   | 42.308     | 1         |
| cg19570545                          | PKP1;PKP1                  | 0.00010233        | 0.000102333          | 6.54697            | 6.54697                      | T up vs N                              | 26.239  | 33.0687   | 20.1648    | 1         |
| cg19570955                          | ZFYVE26                    | 0.00025975        | 0.000259748          | 0.304753           | -3.28135                     | T down vs N                            | 21.745  | 13.2245   | 9.73058    | 1         |
| cg19573208                          | GTPBP5                     | 0.00033143        | 0.000331429          | 0.208579           | -4.79435                     | T down vs N                            | 20.655  | 23.0113   | 17.8254    | 1         |
| cg19576697                          | F12                        | 1.30E-05          | 1.30E-05             | 0.261965           | -3.81731                     | T down vs N                            | 38.31   | 16.8065   | 7.01915    | 1         |
| cg19576847                          | LOC84856                   | 8.81E-07          | 8.81E-07             | 0.146429           | -6.82925                     | T down vs N                            | 59.559  | 34.5711   | 9.28717    | 1         |
| cg19577312                          | OAT                        | 8.09E-07          | 8.09E-07             | 0.204227           | -4.89651                     | T down vs N                            | 60.358  | 23.6346   | 6.26518    | 1         |
| cg19582200                          | SCUBE1                     | 1.56E-05          | 1.56E-05             | 0.244606           | -4.08821                     | T down vs N                            | 37.1    | 18.5709   | 8.00912    | 1         |
| FLJ35220;FLJ35220;FLJ35220;LOC100   |                            |                   |                      |                    |                              |                                        |         |           |            |           |
| cg19583379                          | 294362                     | 2.05E-06          | 2.05E-06             | 0.264316           | -3.78335                     | T down vs N                            | 52.103  | 16.583    | 5.09243    | 1         |
| cg19585156                          | IGSF21                     | 0.0003004         | 0.000300396          | 10.7911            | 10.7911                      | T up vs N                              | 21.091  | 52.9968   | 40.205     | 1         |
| cg19593490                          | HCG9                       | 2.37E-06          | 2.37E-06             | 5.33577            | 5.33577                      | T up vs N                              | 50.892  | 26.2602   | 8.25597    | 1         |
| cg19593680                          | SORCS2                     | 0.00072024        | 0.000720243          | 0.256365           | -3.90069                     | T down vs N                            | 17.401  | 17.353    | 15.9558    | 1         |
| cg19594218                          | L1TD1;L1TD1;L1TD1;L1TD1    | 0.00055906        | 0.000559061          | 4.65701            | 4.65701                      | T up vs N                              | 18.428  | 22.1659   | 19.2458    | 1         |
| cg19594666                          | LEP                        | 2.28E-05          | 2.28E-05             | 14.3438            | 14.3438                      | T up vs N                              | 34.706  | 66.4366   | 30.6285    | 1         |
| PCDHA6;PCDHA2;PCDHA1;PCDHA7;PC      |                            |                   |                      |                    |                              |                                        |         |           |            |           |
| DHA1;PCDHA8;PCDHA6;PCDHA5;PCD       |                            |                   |                      |                    |                              |                                        |         |           |            |           |
| cg19596110                          | HA8;PCDHA3;PCDHA4          | 0.0005566         | 0.000556596          | 5.53821            | 5.53821                      | T up vs N                              | 18.446  | 27.4411   | 23.8026    | 1         |
| cg19598416                          | CAPN2;CAPN2                | 0.00011526        | 0.000115257          | 13.0891            | 13.0891                      | T up vs N                              | 25.635  | 61.9483   | 38.665     | 1         |
| cg19599827                          | EXOC2                      | 0.00124782        | 0.00124782           | 0.234794           | -4.25906                     | T down vs N                            | 15.286  | 19.6665   | 20.5847    | 1         |
| cg19600023                          | PPP1R14C                   | 4.08E-05          | 4.08E-05             | 0.330869           | -3.02234                     | T down vs N                            | 31.228  | 11.4577   | 5.87057    | 1         |
| cg19600115                          | LRRC3B                     | 0.00017535        | 0.000175354          | 3.5232             | 3.5232                       | T up vs N                              | 23.576  | 14.8549   | 10.0814    | 1         |

| Probeset ID                     | UCSC_REFGENE_NAME          | p-value<br>(Type) | p-value (T vs.<br>N) | Ratio (T<br>vs. N) | Fold-<br>Change (T<br>vs. N) | Fold-Change (T vs.<br>N) (Description) | F(Type) | SS (Type) | SS (Error) | F (Error) |
|---------------------------------|----------------------------|-------------------|----------------------|--------------------|------------------------------|----------------------------------------|---------|-----------|------------|-----------|
| cg19600538                      | SLC44A3;SLC44A3            | 0.0038212         | 0.0038212            | 0.276594           | -3.61541                     | T down vs N                            | 11.422  | 15.4706   | 21.672     | 1         |
| cg19606290                      | MIR520B                    | 3.81E-05          | 3.81E-05             | 0.143837           | -6.9523                      | T down vs N                            | 31.621  | 35.2168   | 17.8196    | 1         |
| RASGRP4;RASGRP4;RASGRP4;RASGRP  |                            |                   |                      |                    |                              |                                        |         |           |            |           |
| cg19607092                      | 4;RASGRP4;RASGRP4;RASGRP4  | 0.00185386        | 0.00185386           | 0.330194           | -3.02853                     | T down vs N                            | 13.854  | 11.5001   | 13.2815    | 1         |
| cg19609502                      | FAM83F;FAM83F              | 1.89E-05          | 1.89E-05             | 31.2117            | 31.2117                      | T up vs N                              | 35.868  | 110.887   | 49.464     | 1         |
| cg19610869                      | C5orf52;C5orf52            | 0.00310719        | 0.00310719           | 3.4316             | 3.4316                       | T up vs N                              | 12.094  | 14.2399   | 18.8396    | 1         |
| cg19611002                      | ACTL9                      | 7.34E-05          | 7.34E-05             | 0.220701           | -4.53102                     | T down vs N                            | 27.972  | 21.3826   | 12.2309    | 1         |
| cg19615102                      | HSP90B1                    | 0.00010588        | 0.000105875          | 0.331235           | -3.019                       | T down vs N                            | 26.065  | 11.4348   | 7.01924    | 1         |
| cg19615651                      | TRIAP1                     | 4.35E-05          | 4.35E-05             | 0.209802           | -4.7664                      | T down vs N                            | 30.859  | 22.84     | 11.8422    | 1         |
| cg19616372                      | DLG3;DLG3;DLG3             | 0.00100248        | 0.00100248           | 6.56958            | 6.56958                      | T up vs N                              | 16.111  | 33.1901   | 32.9619    | 1         |
| cg19617213                      | HMHA1                      | 0.00592928        | 0.00592928           | 0.325848           | -3.06892                     | T down vs N                            | 10.055  | 11.7767   | 18.7404    | 1         |
| COASY;COASY;COASY;COASY;COASY   |                            |                   |                      |                    |                              |                                        |         |           |            |           |
| cg19618279                      | OXTR                       | 7.97E-06          | 7.97E-06             | 0.085805           | -11.6543                     | T down vs N                            | 41.648  | 56.4811   | 21.6984    | 1         |
| cg19619174                      | AADACL3;AADACL3            | 0.00354234        | 0.00354234           | 7.16302            | 7.16302                      | T up vs N                              | 11.666  | 36.3097   | 49.8004    | 1         |
| cg19620994                      | AADACL3;AADACL3            | 8.83E-06          | 8.83E-06             | 0.319587           | -3.12904                     | T down vs N                            | 40.929  | 12.1877   | 4.76448    | 1         |
| cg19621753                      | RAX                        | 2.82E-05          | 2.82E-05             | 0.237345           | -4.21328                     | T down vs N                            | 33.395  | 19.3743   | 9.28248    | 1         |
| cg19622569                      | KIAA1530                   | 0.00139751        | 0.00139751           | 0.283299           | -3.52984                     | T down vs N                            | 15.274  | 14.0229   | 13.7709    | 1         |
| cg19623751                      | CEACAM7                    | 0.00119474        | 0.00119474           | 0.27264            | -3.66783                     | T down vs N                            | 15.448  | 15.8191   | 16.3842    | 1         |
| cg19624849                      | HFE2;HFE2;HFE2;HFE2        | 0.00138978        | 0.00138978           | 15.4501            | 15.4501                      | T up vs N                              | 15.296  | 66.0661   | 64.7889    | 1         |
| cg19626213                      | PADI6                      | 8.20E-06          | 8.20E-06             | 0.305551           | -3.27278                     | T down vs N                            | 41.451  | 13.1664   | 5.08223    | 1         |
| cg19626656                      | C1orf159                   | 0.00011538        | 0.000115375          | 0.133283           | -7.50286                     | T down vs N                            | 25.63   | 38.0394   | 23.747     | 1         |
| cg19628469                      | ELANE                      | 7.94E-07          | 7.94E-07             | 0.123677           | -8.08558                     | T down vs N                            | 60.54   | 40.9156   | 10.8136    | 1         |
| cg19628497                      | DLK1                       | 9.01E-05          | 9.01E-05             | 3.42393            | 3.42393                      | T up vs N                              | 26.894  | 14.1882   | 8.44114    | 1         |
| cg19629208                      | SLC34A1;SLC34A1            | 7.70E-06          | 7.70E-06             | 0.283676           | -3.52514                     | T down vs N                            | 41.89   | 14.8679   | 5.67889    | 1         |
| cg19634315                      | THSD4                      | 0.00058221        | 0.000582213          | 0.170234           | -5.87426                     | T down vs N                            | 26.794  | 17.7954   | 5.97736    | 1         |
| cg19635505                      | KLHL33                     | 1.67E-06          | 1.67E-06             | 11.0071            | 11.0071                      | T up vs N                              | 53.825  | 53.8836   | 16.0176    | 1         |
| cg19635695                      | PDE6C;PDE6C                | 0.00016052        | 0.000160519          | 0.313683           | -3.18793                     | T down vs N                            | 24.001  | 12.5895   | 8.39281    | 1         |
| cg19636240                      | TEX101;TEX101              | 0.00011673        | 0.000116728          | 0.151314           | -6.60878                     | T down vs N                            | 25.571  | 33.4002   | 20.8988    | 1         |
| cg19636861                      | ZNF556                     | 0.00553789        | 0.00553789           | 0.298933           | -3.34523                     | T down vs N                            | 10.262  | 13.6572   | 21.294     | 1         |
| cg19636887                      | HAUS7;TREX2                | 0.00030057        | 0.000300571          | 0.237127           | -4.21715                     | T down vs N                            | 21.088  | 19.399    | 14.7185    | 1         |
| cg19638292                      | ASB10;ASB10;ASB10          | 0.00093123        | 0.000931225          | 0.308871           | -3.2376                      | T down vs N                            | 16.394  | 12.9275   | 12.617     | 1         |
| cg19639560                      | SLC16A11                   | 1.69E-05          | 1.69E-05             | 6.02477            | 6.02477                      | T up vs N                              | 36.581  | 30.2076   | 13.2123    | 1         |
| cg19640007                      | C4orf51                    | 0.00026274        | 0.000262736          | 0.323205           | -3.09401                     | T down vs N                            | 21.693  | 11.9484   | 8.81264    | 1         |
| PHACTR2;PHACTR2;PHACTR2;PHACTR  |                            |                   |                      |                    |                              |                                        |         |           |            |           |
| cg19640585                      | 2                          | 0.00051763        | 0.00051763           | 0.282084           | -3.54504                     | T down vs N                            | 18.746  | 15.001    | 12.8034    | 1         |
| cg19642306                      | PTPRN2;PTPRN2;PTPRN2       | 0.00085765        | 0.000857645          | 0.267616           | -3.7367                      | T down vs N                            | 16.713  | 16.2752   | 15.5811    | 1         |
| cg19643467                      | SLC5A4                     | 8.87E-06          | 8.87E-06             | 0.290578           | -3.44142                     | T down vs N                            | 40.896  | 14.3059   | 5.59699    | 1         |
| cg19647111                      | TNXB                       | 0.00053379        | 0.000533789          | 0.328168           | -3.04722                     | T down vs N                            | 18.619  | 11.6282   | 9.9927     | 1         |
| cg19648552                      | EPN1;EPN1;EPN1             | 0.00037978        | 0.000379777          | 3.00709            | 3.00709                      | T up vs N                              | 20.06   | 11.3531   | 9.05515    | 1         |
| cg19651706                      | CEACAM16                   | 0.00020757        | 0.000207565          | 0.122907           | -8.13625                     | T down vs N                            | 22.779  | 41.1605   | 28.9114    | 1         |
| cg19654437                      | CDK15                      | 0.00103439        | 0.00103439           | 0.312115           | -3.20395                     | T down vs N                            | 15.991  | 12.6986   | 12.7055    | 1         |
| PGAP2;PGAP2;PGAP2;PGAP2;PGAP2;P |                            |                   |                      |                    |                              |                                        |         |           |            |           |
| cg19654882                      | GAP2;PGAP2;PGAP2           | 0.000838          | 0.000838002          | 3.309              | 3.309                        | T up vs N                              | 16.803  | 13.412    | 12.7709    | 1         |
| cg19656633                      | FLT4;FLT4                  | 9.51E-06          | 9.51E-06             | 0.321348           | -3.11189                     | T down vs N                            | 40.413  | 12.0706   | 4.77888    | 1         |
| cg19656689                      | PTPRR;PTPRR                | 7.71E-05          | 7.71E-05             | 0.324651           | -3.08023                     | T down vs N                            | 27.715  | 11.8541   | 6.84351    | 1         |
| cg19657039                      | ESRRA                      | 0.00010653        | 0.000106525          | 0.302437           | -3.30648                     | T down vs N                            | 26.034  | 13.3949   | 8.23229    | 1         |
| cg19657214                      | DEFA4                      | 3.08E-05          | 3.08E-05             | 0.227725           | -4.39127                     | T down vs N                            | 32.866  | 20.5051   | 9.98238    | 1         |
| cg19660531                      | ANO2                       | 0.00131191        | 0.00131191           | 0.110937           | -9.01414                     | T down vs N                            | 15.101  | 45.2826   | 47.9785    | 1         |
| cg19661030                      | ACOX3;ACOX3                | 7.82E-05          | 7.82E-05             | 0.127472           | -7.84483                     | T down vs N                            | 27.639  | 39.7406   | 23.0054    | 1         |
| cg19669385                      | NXN                        | 0.00164313        | 0.00164313           | 0.117594           | -8.50383                     | T down vs N                            | 14.283  | 42.914    | 48.0738    | 1         |
| cg19670885                      | RGS12;RGS12                | 0.0005531         | 0.000553097          | 0.327234           | -3.05592                     | T down vs N                            | 18.472  | 11.6877   | 10.1238    | 1         |
| cg19672271                      | NHEDC1;NHEDC1              | 0.00351017        | 0.00351017           | 0.284105           | -3.51983                     | T down vs N                            | 11.695  | 14.8323   | 20.2917    | 1         |
| cg19672993                      | AUTS2;AUTS2                | 5.98E-07          | 5.98E-07             | 0.105447           | -9.48343                     | T down vs N                            | 63.254  | 47.397    | 11.989     | 1         |
| cg19673705                      | OLFML1                     | 1.87E-05          | 1.87E-05             | 0.229739           | -4.35277                     | T down vs N                            | 35.944  | 20.2617   | 9.01924    | 1         |
| cg19674178                      | FGF7;C15orf33              | 2.47E-06          | 2.47E-06             | 0.224437           | -4.45559                     | T down vs N                            | 50.574  | 20.9101   | 6.6153     | 1         |
| cg19678392                      | PON1;PON1                  | 0.00425111        | 0.00425111           | 4.13397            | 4.13397                      | T up vs N                              | 11.083  | 18.8657   | 27.2368    | 1         |
| cg19680277                      | TIMM8A                     | 0.00220419        | 0.00220419           | 0.250339           | -3.99458                     | T down vs N                            | 13.251  | 17.9648   | 21.6924    | 1         |
| MRPL55;MRPL55;MRPL55;MRPL55;M   |                            |                   |                      |                    |                              |                                        |         |           |            |           |
| cg19680616                      | RPL55;MRPL55;MRPL55;MRPL55 | 0.00372707        | 0.00372707           | 0.284546           | -3.51437                     | T down vs N                            | 11.502  | 14.7957   | 20.5823    | 1         |
| cg19681352                      | C1orf172                   | 0.00034236        | 0.000342364          | 0.209661           | -4.76961                     | T down vs N                            | 20.512  | 22.8597   | 17.8311    | 1         |
| cg19681842                      | UBR7;UBR7;C14orf142        | 0.00032307        | 0.000323068          | 0.289245           | -3.45728                     | T down vs N                            | 20.768  | 14.4126   | 11.1039    | 1         |
| cg19682249                      | SOC52                      | 0.00010925        | 0.000109252          | 0.231263           | -4.32408                     | T down vs N                            | 25.905  | 20.0799   | 12.402     | 1         |
| cg19682367                      | TPRG1                      | 4.57E-05          | 4.57E-05             | 0.305388           | -3.27452                     | T down vs N                            | 30.581  | 13.1782   | 6.89482    | 1         |
| cg19684083                      | LNX1;LNX1                  | 0.00659299        | 0.00659299           | 0.288044           | -3.47169                     | T down vs N                            | 9.7364  | 14.5094   | 23.8435    | 1         |
| cg19685066                      | ACTL8                      | 0.00042164        | 0.000421641          | 0.232966           | -4.29247                     | T down vs N                            | 19.611  | 19.8792   | 16.219     | 1         |
| cg19685205                      | CLEC4D                     | 6.27E-07          | 6.27E-07             | 0.156311           | -6.3975                      | T down vs N                            | 62.798  | 32.2607   | 8.21962    | 1         |
| cg19686152                      | TMOD3                      | 5.73E-05          | 5.73E-05             | 0.303491           | -3.29499                     | T down vs N                            | 29.318  | 13.317    | 7.26757    | 1         |
| cg19689322                      | KCNQ4;KCNQ4                | 0.0002709         | 0.000270897          | 3.53697            | 3.53697                      | T up vs N                              | 21.555  | 14.947    | 11.0952    | 1         |
| cg19689368                      | FAM180A                    | 0.00125941        | 0.00125941           | 0.30992            | -3.22664                     | T down vs N                            | 15.252  | 12.853    | 13.4833    | 1         |
| cg19689427                      | PCDHGA2;PCDHGA1;PCDHGA2    | 0.00068057        | 0.00068057           | 3.70806            | 3.70806                      | T up vs N                              | 17.628  | 16.0858   | 14.6004    | 1         |

| Probeset ID                                                     | UCSC_REFGENE_NAME         | p-value<br>(Type) | p-value (T vs.<br>N) | Ratio (T<br>vs. N) | Fold-<br>Change (T<br>vs. N) | Fold-Change (T vs.<br>N) (Description) | F(Type) | SS (Type) | SS (Error) | F (Error) |
|-----------------------------------------------------------------|---------------------------|-------------------|----------------------|--------------------|------------------------------|----------------------------------------|---------|-----------|------------|-----------|
| cg19689828                                                      | GLYATL2                   | 0.00041825        | 0.000418248          | 0.244587           | -4.08852                     | T down vs N                            | 19.645  | 18.5729   | 15.1266    | 1         |
| cg19690410                                                      | MYCBP;GJA9                | 0.00115699        | 0.00115699           | 0.23384            | -4.27643                     | T down vs N                            | 15.568  | 19.7771   | 20.3256    | 1         |
| cg19693890                                                      | HGC6.3                    | 0.00082837        | 0.000828367          | 0.311035           | -3.21507                     | T down vs N                            | 16.849  | 12.7742   | 12.1309    | 1         |
| cg19694099                                                      | OVOL1                     | 0.00055643        | 0.000556433          | 0.274741           | -3.63979                     | T down vs N                            | 18.447  | 15.6328   | 13.5591    | 1         |
| cg19694460                                                      | RSPH10B;RSPH10B2          | 0.00013029        | 0.000130293          | 0.271675           | -3.68086                     | T down vs N                            | 25.022  | 15.9055   | 10.1707    | 1         |
| cg19696441                                                      | UBXN10                    | 0.00047129        | 0.000471287          | 7.07714            | 7.07714                      | T up vs N                              | 19.139  | 35.8662   | 29.9841    | 1         |
| cg19697239                                                      | NINJ2                     | 0.00037356        | 0.000373559          | 8.7269             | 8.7269                       | T up vs N                              | 20.132  | 43.9585   | 34.9364    | 1         |
| cg19697382                                                      | CAMTA1                    | 2.16E-06          | 2.16E-06             | 0.241788           | -4.13586                     | T down vs N                            | 51.673  | 18.8778   | 5.84529    | 1         |
| cg19699840                                                      | PLA2R1;PLA2R1             | 5.00E-05          | 5.00E-05             | 9.61908            | 9.61908                      | T up vs N                              | 30.079  | 47.9974   | 25.5313    | 1         |
| cg19700682                                                      | AGAP11                    | 1.63E-06          | 1.63E-06             | 0.319492           | -3.12997                     | T down vs N                            | 54.062  | 12.1941   | 3.60895    | 1         |
| cg19702771                                                      | PRKG2                     | 0.0002855         | 0.000285503          | 0.330614           | -3.02467                     | T down vs N                            | 21.318  | 11.4737   | 8.61137    | 1         |
| cg19702785                                                      | KCN51                     | 1.18E-05          | 1.18E-05             | 7.89964            | 7.89964                      | T up vs N                              | 38.927  | 40.0097   | 16.4452    | 1         |
| cg19708340                                                      | DSP;DSP                   | 1.13E-06          | 1.13E-06             | 0.145999           | -6.84935                     | T down vs N                            | 57.272  | 34.677    | 9.68768    | 1         |
| cg19708541                                                      | TBC1D2B;TBC1D2B           | 0.00040428        | 0.000404276          | 3.3031             | 3.3031                       | T up vs N                              | 19.791  | 13.372    | 10.8107    | 1         |
| cg19710814                                                      | HLA-DPB2                  | 0.00668821        | 0.00668821           | 0.27577            | -3.62621                     | T down vs N                            | 9.6938  | 15.5425   | 25.6535    | 1         |
| cg19712600                                                      | SMARCE1                   | 0.00024174        | 0.000241744          | 0.291771           | -3.42734                     | T down vs N                            | 22.073  | 14.2112   | 10.3013    | 1         |
| cg19716073                                                      | CACNG1                    | 0.00010599        | 0.000105986          | 0.295601           | -3.38294                     | T down vs N                            | 26.06   | 13.9119   | 8.54157    | 1         |
| cg19716902                                                      | TMEM200B                  | 0.00393165        | 0.00393165           | 8.90539            | 8.90539                      | T up vs N                              | 11.331  | 44.784    | 63.2402    | 1         |
| cg19717216                                                      | CREB3L3                   | 0.00018937        | 0.000189367          | 0.317138           | -3.1532                      | T down vs N                            | 23.21   | 12.3527   | 8.51531    | 1         |
| cg19717640                                                      | LRIT2                     | 0.00186657        | 0.00186657           | 0.262148           | -3.0661                      | T down vs N                            | 13.83   | 11.7574   | 13.6024    | 1         |
| cg19718360                                                      | CD84                      | 7.11E-05          | 7.11E-05             | 0.247714           | -4.03692                     | T down vs N                            | 28.148  | 18.2394   | 10.3677    | 1         |
| cg19718771                                                      | LOC642597                 | 0.0004559         | 0.000455898          | 0.304166           | -3.28768                     | T down vs N                            | 19.279  | 13.2675   | 11.011     | 1         |
| cg19718882                                                      | WIT1                      | 0.00508523        | 0.00508523           | 5.28301            | 5.28301                      | T up vs N                              | 10.523  | 25.9494   | 39.4545    | 1         |
| cg19720260                                                      | FAM55B;FAM55B             | 4.62E-05          | 4.62E-05             | 0.275483           | -3.62999                     | T down vs N                            | 30.52   | 15.5676   | 8.16126    | 1         |
| cg19722814                                                      | SERPINE1;SERPINE1         | 0.00207404        | 0.00207404           | 0.316183           | -3.16272                     | T down vs N                            | 13.461  | 12.4176   | 14.7597    | 1         |
| cg19723367                                                      | LOC643486                 | 0.00064871        | 0.000648706          | 0.164545           | -6.07737                     | T down vs N                            | 17.821  | 30.5007   | 27.3842    | 1         |
| cg19723596                                                      | RPS8;SNORD38A;SNORD38B    | 0.0014791         | 0.0014791            | 0.211763           | -4.72227                     | T down vs N                            | 14.662  | 22.5687   | 24.6283    | 1         |
| cg19723705                                                      | AR;AR                     | 0.00018805        | 0.000188046          | 0.272261           | -3.67295                     | T down vs N                            | 23.244  | 15.8531   | 10.9127    | 1         |
| cg19724485                                                      | OR5T2                     | 0.00119877        | 0.00119877           | 0.248419           | -4.02546                     | T down vs N                            | 15.436  | 18.1651   | 18.8293    | 1         |
| cg19725343                                                      | IGLON5                    | 0.00059176        | 0.000591761          | 6.74149            | 6.74149                      | T up vs N                              | 18.194  | 34.1072   | 29.9938    | 1         |
| cg19725903                                                      | PLBD1                     | 0.00076502        | 0.000765017          | 5.34478            | 5.34478                      | T up vs N                              | 17.162  | 26.3131   | 24.5321    | 1         |
| KIR2DL4;KIR2DL4;KIR2DL4;KIR2DL4;KIR2DL4;KIR2DL4                 |                           |                   |                      |                    |                              |                                        |         |           |            |           |
| cg19725935                                                      | R2DL4;KIR2DL4             | 0.00053944        | 0.000539444          | 0.239909           | -4.16824                     | T down vs N                            | 18.575  | 19.0858   | 16.4399    | 1         |
| cg19726712                                                      | LAPTM4B                   | 0.00030197        | 0.000301972          | 0.174199           | -5.74056                     | T down vs N                            | 21.067  | 28.6038   | 21.7238    | 1         |
| cg19728223                                                      | KCNQ1;KCNQ1               | 2.95E-05          | 2.95E-05             | 7.33747            | 7.33747                      | T up vs N                              | 33.137  | 37.2026   | 17.9633    | 1         |
| cg19728345                                                      | SLC6A3                    | 0.00223596        | 0.00223596           | 0.29758            | -3.36044                     | T down vs N                            | 13.201  | 13.76     | 16.6772    | 1         |
| cg19730248                                                      | C1orf53                   | 2.29E-05          | 2.29E-05             | 0.178005           | -5.61781                     | T down vs N                            | 34.664  | 27.9006   | 12.878     | 1         |
| cg19731612                                                      | NSD1;NSD1                 | 9.75E-05          | 9.75E-05             | 8.53102            | 8.53102                      | T up vs N                              | 26.486  | 43.0421   | 26.0015    | 1         |
| cg19734045                                                      | A4GNT                     | 0.00185501        | 0.00185501           | 0.259884           | -3.84787                     | T down vs N                            | 13.852  | 17.0072   | 19.6448    | 1         |
| cg19734190                                                      | TBC1D14;TBC1D14;TBC1D14   | 0.00363339        | 0.00363339           | 0.302152           | -3.30959                     | T down vs N                            | 11.584  | 13.416    | 18.5309    | 1         |
| cg19735538                                                      | C6orf227                  | 0.00012441        | 0.000124411          | 9.04311            | 9.04311                      | T up vs N                              | 25.252  | 45.4148   | 28.7758    | 1         |
| cg19737179                                                      | KCNJ15;KCNJ15;KCNJ15      | 0.00046999        | 0.000469993          | 0.218469           | -4.5773                      | T down vs N                            | 19.15   | 21.6712   | 18.1061    | 1         |
| cg19738506                                                      | OPRD1                     | 0.00033023        | 0.000330233          | 0.233317           | -4.28601                     | T down vs N                            | 20.671  | 19.8381   | 15.3554    | 1         |
| cg19743791                                                      | BEST2                     | 7.10E-05          | 7.10E-05             | 0.277133           | -3.60838                     | T down vs N                            | 28.151  | 15.4237   | 8.76624    | 1         |
| cg19744936                                                      | EPHX3;EPHX3               | 1.50E-06          | 1.50E-06             | 21.2367            | 21.2367                      | T up vs N                              | 54.759  | 87.4563   | 25.554     | 1         |
| cg19746186                                                      | FGGY;FGGY                 | 2.51E-05          | 2.51E-05             | 0.288927           | -3.46109                     | T down vs N                            | 34.098  | 14.4382   | 6.77483    | 1         |
| cg19747271                                                      | SCAND3                    | 0.00012946        | 0.000129459          | 0.221595           | -4.51274                     | T down vs N                            | 25.054  | 21.2683   | 13.5825    | 1         |
| cg19747744                                                      | ANKFY1                    | 0.000278          | 0.000278004          | 0.322969           | -3.09627                     | T down vs N                            | 21.438  | 11.9639   | 8.92915    | 1         |
| PCDHGA4;PCDHGA2;PCDHGA5;PCDHGA2;PCDHGA1;PCDHGB1;PCDHGA3;PCDHGA5 |                           |                   |                      |                    |                              |                                        |         |           |            |           |
| cg19748485                                                      | DHGA5                     | 8.35E-05          | 8.35E-05             | 3.26392            | 3.26392                      | T up vs N                              | 27.291  | 13.1063   | 7.68387    | 1         |
| cg19751990                                                      | OR5N5                     | 0.00121473        | 0.00121473           | 0.172668           | -5.79146                     | T down vs N                            | 15.386  | 28.8936   | 30.0461    | 1         |
| cg19752686                                                      | AGAP3;AGAP3               | 7.45E-06          | 7.45E-06             | 4.61039            | 4.61039                      | T up vs N                              | 42.124  | 21.8769   | 8.30947    | 1         |
| cg19755459                                                      | PLEKHA5;PLEKHA5           | 0.00155367        | 0.00155367           | 0.328357           | -3.04547                     | T down vs N                            | 14.484  | 11.6162   | 12.832     | 1         |
| cg19757131                                                      | UST                       | 8.34E-07          | 8.34E-07             | 0.179439           | -5.57293                     | T down vs N                            | 60.075  | 27.6419   | 7.36197    | 1         |
| cg19757631                                                      | SRM                       | 9.09E-05          | 9.09E-05             | 0.135401           | -7.38547                     | T down vs N                            | 26.847  | 37.4465   | 22.3174    | 1         |
| cg19759172                                                      | SEPT4;SEPT4;SEPT4         | 0.00061726        | 0.000617261          | 3.97278            | 3.97278                      | T up vs N                              | 18.022  | 17.8231   | 15.8232    | 1         |
| cg19759366                                                      | AGAP1;AGAP1               | 0.00662734        | 0.00662734           | 0.221151           | -4.5218                      | T down vs N                            | 9.721   | 21.3249   | 35.0993    | 1         |
| cg19759671                                                      | MGC45800                  | 0.00144084        | 0.00144084           | 10.0999            | 10.0999                      | T up vs N                              | 14.757  | 50.0881   | 54.3058    | 1         |
| cg19760072                                                      | ZBTB47                    | 6.45E-05          | 6.45E-05             | 3.08878            | 3.08878                      | T up vs N                              | 28.674  | 11.9126   | 6.64729    | 1         |
| cg19761110                                                      | AGAP1;AGAP1               | 0.00031133        | 0.000311329          | 3.26073            | 3.26073                      | T up vs N                              | 20.932  | 13.0846   | 10.0018    | 1         |
| cg19762657                                                      | MAL;MAL;MAL;MAL           | 7.14E-06          | 7.14E-06             | 17.9723            | 17.9723                      | T up vs N                              | 42.431  | 78.1637   | 29.4745    | 1         |
| cg19765175                                                      | DIP2C;C10orf108;C10orf108 | 0.0002713         | 0.000271298          | 0.188952           | -5.29236                     | T down vs N                            | 21.548  | 26.0046   | 19.3091    | 1         |
| cg19766988                                                      | EIF3G                     | 1.28E-05          | 1.28E-05             | 0.189639           | -5.27319                     | T down vs N                            | 38.395  | 25.8914   | 10.7894    | 1         |
| cg19767205                                                      | PCDH1;PCDH1               | 0.00293096        | 0.00293096           | 0.328208           | -3.04685                     | T down vs N                            | 12.287  | 11.6256   | 15.1392    | 1         |
| cg19773937                                                      | FGGY;FGGY                 | 2.01E-06          | 2.01E-06             | 0.121154           | -8.25399                     | T down vs N                            | 52.266  | 41.7266   | 12.7737    | 1         |
| cg19774425                                                      | KLK1                      | 0.00304914        | 0.00304914           | 0.324244           | -3.0841                      | T down vs N                            | 12.156  | 11.8806   | 15.6377    | 1         |
| cg19775269                                                      | PTPRS;PTPRS;PTPRS;PTPRS   | 0.00030056        | 0.000300563          | 3.2802             | 3.2802                       | T up vs N                              | 21.088  | 13.2168   | 10.0278    | 1         |
| cg19776942                                                      | FAM167B                   | 0.00012984        | 0.000129835          | 3.99805            | 3.99805                      | T up vs N                              | 25.039  | 17.9873   | 11.4938    | 1         |
| cg19779488                                                      | UBTD2                     | 1.92E-05          | 1.92E-05             | 0.154646           | -6.4664                      | T down vs N                            | 35.783  | 32.6342   | 14.5921    | 1         |
| cg19779605                                                      | OR51E2                    | 5.30E-06          | 5.30E-06             | 0.184531           | -5.41915                     | T down vs N                            | 44.606  | 26.7488   | 9.5946     | 1         |
| cg19780571                                                      | CPN1                      | 2.31E-05          | 2.31E-05             | 0.248445           | -4.02504                     | T down vs N                            | 34.611  | 18.1624   | 8.39612    | 1         |

| Probeset ID | UCSC_REFGENE_NAME             | p-value<br>(Type) | p-value (T vs.<br>N) | Ratio (T<br>vs. N) | Fold-<br>Change (T<br>vs. N) | Fold-Change (T vs.<br>N) (Description) | F(Type) | SS (Type) | SS (Error) | F (Error) |
|-------------|-------------------------------|-------------------|----------------------|--------------------|------------------------------|----------------------------------------|---------|-----------|------------|-----------|
| cg19780614  | KIF13B                        | 1.67E-05          | 1.67E-05             | 5.47685            | 5.47685                      | T up vs N                              | 36.655  | 27.0851   | 11.8228    | 1         |
| cg19781637  | LHFPL2                        | 0.00064745        | 0.000647447          | 0.215386           | -4.64282                     | T down vs N                            | 17.829  | 22.0781   | 19.8135    | 1         |
| cg19782880  | CPNE9                         | 3.83E-05          | 3.83E-05             | 0.209691           | -4.76892                     | T down vs N                            | 31.591  | 22.8555   | 11.5757    | 1         |
| cg19784262  | AVPR2                         | 0.00352272        | 0.00352272           | 0.252574           | -3.95924                     | T down vs N                            | 11.684  | 17.735    | 24.2869    | 1         |
| cg19784903  | TBKBP1                        | 0.0003939         | 0.000393897          | 3.43604            | 3.43604                      | T up vs N                              | 20.577  | 13.4304   | 9.79049    | 1         |
| cg19786733  | KLB                           | 0.00024101        | 0.000241005          | 5.1482             | 5.1482                       | T up vs N                              | 22.087  | 25.1497   | 18.2186    | 1         |
| cg19788727  | NTN1                          | 3.60E-05          | 3.60E-05             | 0.12807            | -7.80824                     | T down vs N                            | 31.947  | 39.5605   | 19.813     | 1         |
| cg19788934  | C12orf43                      | 3.65E-05          | 3.65E-05             | 0.327171           | -3.05651                     | T down vs N                            | 31.875  | 11.6918   | 5.86879    | 1         |
| cg19790509  | TMEM132D                      | 3.63E-06          | 3.63E-06             | 0.113259           | -8.82934                     | T down vs N                            | 47.489  | 44.4334   | 14.9706    | 1         |
| cg19791714  | CXCR5;CXCR5                   | 6.49E-06          | 6.49E-06             | 0.274505           | -3.64292                     | T down vs N                            | 43.122  | 15.6536   | 5.80814    | 1         |
| cg19792802  | CTSW                          | 8.94E-05          | 8.94E-05             | 0.190006           | -5.263                       | T down vs N                            | 26.933  | 25.8312   | 15.3452    | 1         |
| cg19793499  | AUTS2;AUTS2                   | 5.93E-05          | 5.93E-05             | 0.164126           | -6.09288                     | T down vs N                            | 29.125  | 30.587    | 16.803     | 1         |
| cg19795793  | NRP2;NRP2;NRP2;NRP2;NRP2;NRP2 | 2.33E-05          | 2.33E-05             | 0.162812           | -6.14204                     | T down vs N                            | 34.555  | 30.8596   | 14.2888    | 1         |
| cg19797049  | DNAJC2;DNAJC2                 | 0.00016751        | 0.000167512          | 0.249085           | -4.01469                     | T down vs N                            | 23.795  | 18.0953   | 12.1675    | 1         |
| cg19798881  | BMP6                          | 0.00522286        | 0.00522286           | 0.323835           | -3.08799                     | T down vs N                            | 10.441  | 11.9072   | 18.2467    | 1         |
| cg19802477  | LILRA4                        | 1.25E-05          | 1.25E-05             | 0.299022           | -3.34424                     | T down vs N                            | 38.536  | 13.6505   | 5.66767    | 1         |
| cg19805694  | PRAMEF1                       | 3.03E-06          | 3.03E-06             | 0.299458           | -3.33936                     | T down vs N                            | 48.911  | 13.6175   | 4.45465    | 1         |
| cg19806995  | GLP2R                         | 0.0001455         | 0.0001455            | 0.322882           | -3.09711                     | T down vs N                            | 24.478  | 11.9696   | 7.8239     | 1         |
| cg19808587  | PTAFR;PTAFR                   | 7.68E-05          | 7.68E-05             | 0.198259           | -5.04391                     | T down vs N                            | 27.734  | 24.5254   | 14.149     | 1         |
| cg19808620  | S100A5                        | 0.00088962        | 0.000889622          | 0.219377           | -4.55835                     | T down vs N                            | 16.571  | 21.5531   | 20.8111    | 1         |
| cg19812706  | TCP11L1;TCP11L1               | 0.00019917        | 0.000199173          | 0.200441           | -4.98977                     | T down vs N                            | 22.972  | 24.1993   | 16.8546    | 1         |
| cg19813025  | ADAMTS16                      | 0.00632356        | 0.00632356           | 3.70921            | 3.70921                      | T up vs N                              | 9.861   | 16.0934   | 26.1123    | 1         |
| cg19815271  | ZSWIM7;ZSWIM7                 | 4.05E-06          | 4.05E-06             | 0.187622           | -5.32988                     | T down vs N                            | 46.642  | 26.2255   | 8.99628    | 1         |
| cg19815327  | ZNF860;ZNF860;OSBPL10         | 0.00145319        | 0.00145319           | 5.16636            | 5.16636                      | T up vs N                              | 14.726  | 25.2579   | 27.4426    | 1         |
| cg19816367  | MEGF6                         | 4.20E-05          | 4.20E-05             | 0.314634           | -3.1783                      | T down vs N                            | 31.063  | 12.5238   | 6.45076    | 1         |
| cg19816445  | TUBGCP6                       | 2.42E-07          | 2.42E-07             | 0.279979           | -3.57169                     | T down vs N                            | 72.632  | 15.1791   | 3.34379    | 1         |
| cg19817652  | C17orf98                      | 1.17E-05          | 1.17E-05             | 3.6403             | 3.6403                       | T up vs N                              | 38.982  | 15.6362   | 6.41783    | 1         |
| cg19821361  | KRTAP10-6;C21orf29            | 0.00310702        | 0.00310702           | 0.148778           | -6.72142                     | T down vs N                            | 12.094  | 34.0007   | 44.9827    | 1         |
| cg19825589  | CD79A;CD79A                   | 9.84E-05          | 9.84E-05             | 0.153467           | -6.51607                     | T down vs N                            | 26.438  | 32.9023   | 19.9125    | 1         |
| cg19827650  | HHATL;HHATL;HHATL             | 2.25E-05          | 2.25E-05             | 5.53021            | 5.53021                      | T up vs N                              | 34.771  | 27.3948   | 12.6058    | 1         |
| cg19827787  | ASAP3;ASAP3                   | 0.00021646        | 0.00021646           | 3.7                |                              |                                        |         |           |            |           |

| Probeset ID                                                                                | UCSC_REFGENE_NAME                   | p-value<br>(Type) | p-value (T vs.<br>N) | Ratio (T<br>vs. N) | Fold-<br>Change (T<br>vs. N) | Fold-Change (T vs.<br>N) (Description) | F(Type) | SS (Type) | SS (Error) | F (Error) |
|--------------------------------------------------------------------------------------------|-------------------------------------|-------------------|----------------------|--------------------|------------------------------|----------------------------------------|---------|-----------|------------|-----------|
| cg19893820                                                                                 | TTL6;TTL6                           | 0.00146401        | 0.00146401           | 0.310554           | -3.22005                     | T down vs N                            | 14.699  | 12.8081   | 13.9415    | 1         |
| cg19895517                                                                                 | OTX2;OTX2                           | 5.87E-06          | 5.87E-06             | 0.078757           | -12.6973                     | T down vs N                            | 43.851  | 60.493    | 22.0721    | 1         |
| cg19898448                                                                                 | ANKRD50;ANKRD50                     | 4.47E-05          | 4.47E-05             | 0.281038           | -3.55824                     | T down vs N                            | 30.703  | 15.0892   | 7.86322    | 1         |
| cg19902195                                                                                 | C21orf67;C21orf67                   | 8.77E-05          | 8.77E-05             | 0.300371           | -3.32921                     | T down vs N                            | 27.036  | 13.5489   | 8.01823    | 1         |
| cg19904122                                                                                 | BRUNOL5                             | 5.72E-05          | 5.72E-05             | 7.67952            | 7.67952                      | T up vs N                              | 29.331  | 38.9231   | 21.2325    | 1         |
| cg19904425                                                                                 | SERPINA12                           | 0.00248341        | 0.00248341           | 0.305268           | -3.27581                     | T down vs N                            | 12.843  | 13.187    | 16.4289    | 1         |
| cg19904463                                                                                 | FABP5                               | 5.40E-06          | 5.40E-06             | 9.27456            | 9.27456                      | T up vs N                              | 44.471  | 46.4632   | 16.7169    | 1         |
| cg19905414                                                                                 | TPO;TPO;TPO;TPO                     | 5.40E-05          | 5.40E-05             | 0.318492           | -3.13979                     | T down vs N                            | 29.647  | 12.2612   | 6.61725    | 1         |
| cg19906534                                                                                 | FAM12A                              | 0.00074972        | 0.000749722          | 0.26217            | -3.81432                     | T down vs N                            | 17.242  | 16.7868   | 15.578     | 1         |
| cg19906672                                                                                 | TBC1D14;TBC1D14                     | 0.00164572        | 0.00164572           | 0.318656           | -3.13818                     | T down vs N                            | 14.277  | 12.2502   | 13.7285    | 1         |
| cg19907725                                                                                 | S100A2                              | 1.75E-05          | 1.75E-05             | 0.224523           | -4.45389                     | T down vs N                            | 36.375  | 20.8994   | 9.19282    | 1         |
| cg19907796                                                                                 | VAX2                                | 0.00098425        | 0.00098425           | 0.25064            | -3.98979                     | T down vs N                            | 16.181  | 17.9337   | 17.7331    | 1         |
| cg19914919                                                                                 | TANK;TANK                           | 8.95E-05          | 8.95E-05             | 0.328872           | -3.0407                      | T down vs N                            | 26.928  | 11.5835   | 6.88269    | 1         |
| cg19917412                                                                                 | NAALADL1                            | 0.00262465        | 0.00262465           | 3.08523            | 3.08523                      | T up vs N                              | 12.656  | 11.8883   | 15.0298    | 1         |
| cg19917856                                                                                 | NCCRP1                              | 0.00526254        | 0.00526254           | 3.77394            | 3.77394                      | T up vs N                              | 10.418  | 16.521    | 25.3734    | 1         |
| cg19917915                                                                                 | SIGLEC6;SIGLEC6;SIGLEC6             | 8.05E-06          | 8.05E-06             | 0.300349           | -3.32946                     | T down vs N                            | 41.577  | 13.5505   | 5.21465    | 1         |
| cg19921279                                                                                 | LOC100128071;TSSK3                  | 0.0014572         | 0.0014572            | 4.56239            | 4.56239                      | T up vs N                              | 14.716  | 21.5783   | 23.4607    | 1         |
| cg19924334                                                                                 | PRIC285;PRIC285                     | 0.00201322        | 0.00201322           | 0.287889           | -3.47356                     | T down vs N                            | 13.565  | 14.522    | 17.1291    | 1         |
| cg19924619                                                                                 | LMX1A                               | 0.00290311        | 0.00290311           | 8.97747            | 8.97747                      | T up vs N                              | 12.318  | 45.1148   | 58.5984    | 1         |
| cg19925204                                                                                 | EMX2;EMX2                           | 0.00028458        | 0.000284577          | 0.078842           | -12.6836                     | T down vs N                            | 21.333  | 60.4413   | 45.3323    | 1         |
| cg19925597                                                                                 | CARD11                              | 0.00017752        | 0.000177516          | 0.305456           | -3.27379                     | T down vs N                            | 23.517  | 13.1733   | 8.96244    | 1         |
| cg19925849                                                                                 | CACNG7                              | 0.00032069        | 0.000320686          | 3.10397            | 3.10397                      | T up vs N                              | 20.8    | 12.0165   | 9.24329    | 1         |
| cg19926444                                                                                 | ZNF709                              | 0.00203877        | 0.00203877           | 4.29045            | 4.29045                      | T up vs N                              | 13.521  | 19.8663   | 23.5091    | 1         |
| PCDHA6;PCDHA2;PCDHA1;PCDHA9;PCDHA7;PCDHA1;PCDHA6;PCDHA5;PCDHA11;PCDHA11;PCDHA10;PCDHA3;TEC |                                     |                   |                      |                    |                              |                                        |         |           |            |           |
| cg19928377                                                                                 | HA11;PCDHA11;PCDHA10;PCDHA3;TEC     | 3.88E-06          | 3.88E-06             | 4.75725            | 4.75725                      | T up vs N                              | 46.963  | 22.7838   | 7.76228    | 1         |
| cg19929355                                                                                 | GMPPA;GMPPA                         | 0.0007658         | 0.000765803          | 5.81256            | 5.81256                      | T up vs N                              | 17.158  | 29.0133   | 27.056     | 1         |
| cg19930135                                                                                 | DEFB129                             | 5.63E-05          | 5.63E-05             | 5.24341            | 5.24341                      | T up vs N                              | 29.419  | 25.7153   | 13.9859    | 1         |
| cg19931902                                                                                 | ALDH3B1                             | 8.18E-05          | 8.18E-05             | 0.241814           | -4.13542                     | T down vs N                            | 27.403  | 18.875    | 11.0206    | 1         |
| cg19933414                                                                                 | USH2A                               | 4.12E-05          | 4.12E-05             | 0.236465           | -4.22895                     | T down vs N                            | 31.166  | 19.4744   | 9.9978     | 1         |
| cg19938149                                                                                 | GPR25                               | 0.00027611        | 0.000276107          | 0.220867           | -4.52761                     | T down vs N                            | 21.469  | 21.3613   | 15.9199    | 1         |
| cg19940077                                                                                 | SLIT2                               | 5.10E-06          | 5.10E-06             | 7.12657            | 7.12657                      | T up vs N                              | 44.891  | 36.1218   | 12.8745    | 1         |
| cg19940312                                                                                 | BNIP2                               | 0.00032917        | 0.000329173          | 0.276551           | -3.61597                     | T down vs N                            | 20.685  | 15.4743   | 11.9695    | 1         |
| cg19940969                                                                                 | PRR15                               | 4.63E-05          | 4.63E-05             | 0.219711           | -4.55144                     | T down vs N                            | 30.503  | 21.5101   | 11.2827    | 1         |
| cg19942237                                                                                 | ADARB2                              | 1.72E-05          | 1.72E-05             | 19.6622            | 19.6622                      | T up vs N                              | 36.472  | 83.1025   | 36.4563    | 1         |
| cg19942454                                                                                 | TIMP2                               | 0.00017956        | 0.000179563          | 0.197725           | -5.05753                     | T down vs N                            | 23.463  | 24.6072   | 16.7805    | 1         |
| cg19944656                                                                                 | ANKRD33;ANKRD33;ANKRD33;ANKRD33     | 0.0007356         | 0.000735601          | 0.32819            | -3.04702                     | T down vs N                            | 17.317  | 11.6268   | 10.7425    | 1         |
| cg19948393                                                                                 | SEPT9;SEPT9;SEPT9;SEPT9;SEPT9;SEPT9 | 0.00035378        | 0.00035378           | 4.08954            | 4.08954                      | T up vs N                              | 20.369  | 18.5795   | 14.5945    | 1         |
| cg19948701                                                                                 | SERPINB11                           | 0.00053158        | 0.000531584          | 0.229105           | -4.36481                     | T down vs N                            | 18.636  | 20.3379   | 17.4613    | 1         |
| cg19952821                                                                                 | T                                   | 0.00161575        | 0.00161575           | 0.24757            | -4.03926                     | T down vs N                            | 14.343  | 18.2545   | 20.3635    | 1         |
| cg19954341                                                                                 | HDAC4                               | 0.00062038        | 0.000620377          | 3.84704            | 3.84704                      | T up vs N                              | 18.002  | 17.0017   | 15.1111    | 1         |
| cg19955928                                                                                 | NXN                                 | 4.90E-05          | 4.90E-05             | 0.199568           | -5.01082                     | T down vs N                            | 30.188  | 24.3263   | 12.8931    | 1         |
| cg19956147                                                                                 | FAM153B                             | 0.0001668         | 0.0001668            | 0.330094           | -3.02944                     | T down vs N                            | 23.816  | 11.5063   | 7.73034    | 1         |
| cg19956449                                                                                 | CNR1;CNR1;CNR1;CNR1                 | 0.00139862        | 0.00139862           | 0.220764           | -4.52972                     | T down vs N                            | 14.866  | 21.3745   | 23.0051    | 1         |
| cg19961480                                                                                 | MYLK2                               | 3.58E-06          | 3.58E-06             | 13.9409            | 13.9409                      | T up vs N                              | 47.599  | 65.0227   | 21.8569    | 1         |
| cg19961522                                                                                 | MAGEL2                              | 7.89E-05          | 7.89E-05             | 0.304316           | -3.28606                     | T down vs N                            | 27.588  | 13.2565   | 7.6882     | 1         |
| cg19961998                                                                                 | NUDT16P;NUDT16P                     | 2.46E-06          | 2.46E-06             | 0.275254           | -3.633                       | T down vs N                            | 50.587  | 15.5877   | 4.93018    | 1         |
| cg19962116                                                                                 | EPHA6                               | 7.54E-05          | 7.54E-05             | 17.1858            | 17.1858                      | T up vs N                              | 27.829  | 75.761    | 43.5588    | 1         |
| cg19963231                                                                                 | SEC14L4;SEC14L4                     | 3.60E-06          | 3.60E-06             | 0.168106           | -5.94864                     | T down vs N                            | 47.557  | 29.7813   | 10.0195    | 1         |
| cg19964641                                                                                 | C11orf53;C11orf53                   | 0.00011215        | 0.000112147          | 3.87923            | 3.87923                      | T up vs N                              | 25.773  | 17.2127   | 10.6857    | 1         |
| cg19964761                                                                                 | CD74;CD74;CD74                      | 0.00052122        | 0.000521219          | 0.231006           | -4.32888                     | T down vs N                            | 18.718  | 20.1104   | 17.1906    | 1         |
| cg19966212                                                                                 | CABYR;CABYR;CABYR;CABYR;CABYR;CABYR | 0.00054632        | 0.000546319          | 0.29146            | -3.431                       | T down vs N                            | 18.523  | 14.2359   | 12.297     | 1         |
| cg19966472                                                                                 | ABYR                                | 0.00096859        | 0.00096859           | 0.332472           | -3.00777                     | T down vs N                            | 16.242  | 11.3578   | 11.1883    | 1         |
| cg19969694                                                                                 | VPS18                               | 0.00045825        | 0.000458246          | 0.112922           | -8.85567                     | T down vs N                            | 19.257  | 44.555    | 37.019     | 1         |
| cg19972193                                                                                 | FLT4;FLT4                           | 0.00240135        | 0.00240135           | 0.310756           | -3.21796                     | T down vs N                            | 12.957  | 12.7939   | 15.7986    | 1         |
| cg19972590                                                                                 | C22orf28                            | 0.00128108        | 0.00128108           | 0.299816           | -3.33538                     | T down vs N                            | 15.189  | 13.5906   | 14.3164    | 1         |
| cg19973085                                                                                 | FBN2                                | 0.00022923        | 0.000229233          | 0.330953           | -3.02158                     | T down vs N                            | 22.318  | 11.4524   | 8.21056    | 1         |
| cg19975800                                                                                 | UGT1A10;UGT1A8                      | 9.45E-08          | 9.45E-08             | 0.155152           | -6.44529                     | T down vs N                            | 83.545  | 32.52     | 6.228      | 1         |
| cg19978312                                                                                 | RASGEF1C                            | 0.00206377        | 0.00206377           | 3.73191            | 3.73191                      | T up vs N                              | 13.478  | 16.2436   | 19.2825    | 1         |
| cg19978550                                                                                 | ACVR1C;ACVR1C;ACVR1C;ACVR1C         | 8.43E-05          | 8.43E-05             | 3.96964            | 3.96964                      | T up vs N                              | 27.245  | 17.8027   | 10.455     | 1         |
| cg19979590                                                                                 | TLN2                                | 0.00467558        | 0.00467558           | 0.289116           | -3.45882                     | T down vs N                            | 10.784  | 14.4229   | 21.3996    | 1         |
| cg19981409                                                                                 | NOX4;NOX4;NOX4;NOX4                 | 2.78E-06          | 2.78E-06             | 0.19881            | -5.02992                     | T down vs N                            | 49.598  | 24.4413   | 7.88466    | 1         |
| cg19981796                                                                                 | EVISL;EVISL                         | 1.42E-05          | 1.42E-05             | 3.54626            | 3.54626                      | T up vs N                              | 37.702  | 15.0091   | 6.36967    | 1         |
| cg19982230                                                                                 | RAB34;RAB34;RAB34;RAB34;RAB34;RAB34 | 0.00222038        | 0.00222038           | 3.36346            | 3.36346                      | T up vs N                              | 13.225  | 13.7804   | 16.6715    | 1         |
| cg19986012                                                                                 | AB34;RAB34                          | 2.26E-05          | 2.26E-05             | 22.0692            | 22.0692                      | T up vs N                              | 34.756  | 89.6713   | 41.28      | 1         |
| cg19987060                                                                                 | HOXB3                               | 0.00075453        | 0.000754531          | 0.270316           | -3.69938                     | T down vs N                            | 17.216  | 16.0283   | 14.896     | 1         |
| cg19987768                                                                                 | LOC730101;LOC730101                 | 4.36E-05          | 4.36E-05             | 0.197938           | -5.05208                     | T down vs N                            | 30.851  | 24.5745   | 12.7451    | 1         |

| Probeset ID | UCSC_REFGENE_NAME                       | p-value<br>(Type) | p-value (T vs.<br>N) | Ratio (T<br>vs. N) | Fold-<br>Change (T<br>vs. N) | Fold-Change (T vs.<br>N) (Description) | F(Type) | SS (Type) | SS (Error) | F (Error) |
|-------------|-----------------------------------------|-------------------|----------------------|--------------------|------------------------------|----------------------------------------|---------|-----------|------------|-----------|
| cg19988637  | FIS1                                    | 0.00037705        | 0.000377054          | 0.170044           | -5.88085                     | T down vs N                            | 23.837  | 22.3997   | 11.2765    | 1         |
| cg19990651  | HLA-DPB1                                | 0.00140471        | 0.00140471           | 10.1376            | 10.1376                      | T up vs N                              | 14.85   | 50.2498   | 54.1411    | 1         |
| cg19991383  | CACNA2D3                                | 1.63E-05          | 1.63E-05             | 0.245118           | -4.07967                     | T down vs N                            | 36.819  | 18.5158   | 8.04628    | 1         |
| cg19992375  | RASSF3                                  | 3.56E-06          | 3.56E-06             | 0.188551           | -5.30362                     | T down vs N                            | 47.648  | 26.0709   | 8.75458    | 1         |
| cg19992633  | TCL1A;TCL1A                             | 0.00013563        | 0.000135631          | 4.41766            | 4.41766                      | T up vs N                              | 24.823  | 20.6715   | 13.324     | 1         |
| cg19996026  | CTNNA3;CTNNA3                           | 0.00325418        | 0.00325418           | 0.309271           | -3.23342                     | T down vs N                            | 11.942  | 12.899    | 17.2824    | 1         |
| cg19999161  | HOXA3;HOXA3                             | 0.00039387        | 0.000393865          | 6.07812            | 6.07812                      | T up vs N                              | 19.903  | 30.5049   | 24.5228    | 1         |
| cg20002843  | LOC127841                               | 0.00069432        | 0.000694318          | 0.273392           | -3.65775                     | T down vs N                            | 17.548  | 15.7522   | 14.363     | 1         |
| cg20003638  | SLC12A5;SLC12A5                         | 0.00010138        | 0.000101381          | 8.3626             | 8.3626                       | T up vs N                              | 26.287  | 42.2451   | 25.7136    | 1         |
| cg20005760  | EIF3J                                   | 2.58E-05          | 2.58E-05             | 0.13193            | -7.57978                     | T down vs N                            | 33.939  | 38.4255   | 18.1149    | 1         |
| cg20005923  | LOC283999                               | 0.00086892        | 0.000868917          | 3.30481            | 3.30481                      | T up vs N                              | 16.662  | 13.3836   | 12.8519    | 1         |
| cg20007894  | SCAND3                                  | 0.00724589        | 0.00724589           | 0.239939           | -4.16773                     | T down vs N                            | 9.4571  | 19.0825   | 32.2847    | 1         |
| cg20011278  | ALPK1;ALPK1                             | 0.0023567         | 0.0023567            | 0.324964           | -3.07727                     | T down vs N                            | 13.021  | 11.8339   | 14.5413    | 1         |
| cg20014398  | PAX6;PAX6;PAX6                          | 0.00244352        | 0.00244352           | 4.53974            | 4.53974                      | T up vs N                              | 12.898  | 21.437    | 26.5933    | 1         |
| cg20016023  | RRP12;RRP12                             | 2.32E-05          | 2.32E-05             | 0.293539           | -3.4067                      | T down vs N                            | 34.593  | 14.0722   | 6.50878    | 1         |
| cg20018806  | TCN1                                    | 4.91E-05          | 4.91E-05             | 0.169451           | -5.9014                      | T down vs N                            | 30.178  | 29.5156   | 15.6487    | 1         |
| cg20022122  | GCKR                                    | 1.99E-05          | 1.99E-05             | 0.271784           | -3.6794                      | T down vs N                            | 35.534  | 15.8958   | 7.15752    | 1         |
| cg20023259  | PITX3                                   | 5.42E-05          | 5.42E-05             | 4.50527            | 4.50527                      | T up vs N                              | 29.624  | 21.2216   | 11.4618    | 1         |
| cg20026633  | CDH29                                   | 4.15E-05          | 4.15E-05             | 0.272406           | -3.67098                     | T down vs N                            | 31.13   | 15.84     | 8.14124    | 1         |
| cg20026673  | C7orf70                                 | 0.0013703         | 0.0013703            | 0.326045           | -3.06706                     | T down vs N                            | 14.941  | 11.764    | 12.598     | 1         |
| cg20031717  | CYP2C19                                 | 1.73E-05          | 1.73E-05             | 0.183312           | -5.45519                     | T down vs N                            | 36.42   | 26.959    | 11.8435    | 1         |
| cg20033239  | LOC84856                                | 7.54E-06          | 7.54E-06             | 0.095797           | -10.4388                     | T down vs N                            | 42.037  | 51.5279   | 19.6122    | 1         |
| cg20034372  | LOC145845                               | 7.77E-05          | 7.77E-05             | 0.293624           | -3.40571                     | T down vs N                            | 27.671  | 14.0655   | 8.13304    | 1         |
| cg20038038  | LILRA3;LILRA3                           | 8.81E-07          | 8.81E-07             | 0.195881           | -5.10514                     | T down vs N                            | 59.567  | 24.8925   | 6.68629    | 1         |
| cg20038591  | EMX2;EMX2                               | 1.41E-05          | 1.41E-05             | 0.270863           | -3.6919                      | T down vs N                            | 37.754  | 15.9787   | 6.77178    | 1         |
| cg20039407  | CHRNB4                                  | 0.00263519        | 0.00263519           | 6.73012            | 6.73012                      | T up vs N                              | 12.642  | 34.0469   | 43.0897    | 1         |
| cg20039443  | NFATC2;NFATC2;NFATC2                    | 0.00066096        | 0.000660962          | 0.289571           | -3.45339                     | T down vs N                            | 17.745  | 14.3864   | 12.9715    | 1         |
| cg20040691  | ASB4;ASB4                               | 0.00020114        | 0.000201143          | 0.157405           | -6.35302                     | T down vs N                            | 22.926  | 32.0187   | 22.3457    | 1         |
| cg20041446  | VSX1                                    | 0.00210402        | 0.00210402           | 6.80602            | 6.80602                      | T up vs N                              | 13.411  | 34.4486   | 41.0979    | 1         |
| cg20043883  | UST                                     | 1.05E-05          | 1.05E-05             | 0.166569           | -6.00353                     | T down vs N                            | 39.767  | 30.0889   | 12.1062    | 1         |
| cg20050093  | C10orf84;C10orf84                       | 0.00047426        | 0.000474263          | 3.10985            | 3.10985                      | T up vs N                              | 19.112  | 12.0567   | 10.0934    | 1         |
| cg20050108  | FOXP2;FOXP2;FOXP2                       | 3.53E-05          | 3.53E-05             | 0.258029           | -3.87553                     | T down vs N                            | 32.069  | 17.1885   | 8.57587    | 1         |
| cg20050194  | VWA2                                    | 1.06E-09          | 1.06E-09             | 0.236725           | -4.22432                     | T down vs N                            | 157.68  | 19.4448   | 1.97313    | 1         |
| cg20050826  | KRT72;KRT72;KRT72;KRT72;KRT72;KR<br>T72 | 1.96E-05          | 1.96E-05             | 6.91097            | 6.91097                      | T up vs N                              | 35.644  | 35.0005   | 15.7112    | 1         |
| cg20051118  | OR4L1                                   | 0.00016594        | 0.000165944          | 0.257721           | -3.88016                     | T down vs N                            | 23.84   | 17.2188   | 11.5561    | 1         |
| cg20051324  | C6orf26                                 | 0.00345473        | 0.00345473           | 0.300766           | -3.32485                     | T down vs N                            | 11.747  | 13.5193   | 18.4142    | 1         |
| cg20054983  | TBRG1;TBRG1                             | 1.71E-05          | 1.71E-05             | 0.289363           | -3.45587                     | T down vs N                            | 36.497  | 14.4032   | 6.31416    | 1         |
| cg20057782  | ARMC4                                   | 0.00017212        | 0.000172115          | 0.328727           | -3.04204                     | T down vs N                            | 23.665  | 11.5926   | 7.83785    | 1         |
| cg20058148  | MAP9                                    | 0.00085209        | 0.000852092          | 0.245502           | -4.07329                     | T down vs N                            | 16.738  | 18.4746   | 17.6599    | 1         |
| cg20058937  | SLC29A4;SLC29A4                         | 0.00209046        | 0.00209046           | 4.37629            | 4.37629                      | T up vs N                              | 13.434  | 20.4105   | 24.3094    | 1         |
| cg20059151  | SLC44A3;SLC44A3                         | 6.86E-05          | 6.86E-05             | 3.59969            | 3.59969                      | T up vs N                              | 28.335  | 15.3658   | 8.67664    | 1         |
| cg20063640  | NOP56;NOP56;SNORA51                     | 0.00012619        | 0.000126185          | 0.300153           | -3.33163                     | T down vs N                            | 25.181  | 13.5652   | 8.6193     | 1         |
| cg20065449  | ORM5                                    | 4.75E-05          | 4.75E-05             | 0.21549            | -4.64059                     | T down vs N                            | 30.365  | 22.0642   | 11.626     | 1         |
| cg20065463  | DES;DES                                 | 0.00585526        | 0.00585526           | 5.99184            | 5.99184                      | T up vs N                              | 10.093  | 30.0235   | 47.5969    | 1         |
| cg20066782  | FBXL13;LRRC17;FBXL13;LRRC17             | 0.00164416        | 0.00164416           | 4.41302            | 4.41302                      | T up vs N                              | 14.281  | 20.6423   | 23.1278    | 1         |
| cg20067719  | SPATA20                                 | 0.00022299        | 0.000222896          | 0.319514           | -3.12975                     | T down vs N                            | 22.447  | 12.1926   | 8.69072    | 1         |
| cg20067780  | TBC1D16                                 | 6.79E-06          | 6.79E-06             | 0.232061           | -4.30921                     | T down vs N                            | 42.794  | 19.9855   | 7.47234    | 1         |
| cg20070090  | S100A8                                  | 0.00512568        | 0.00512568           | 0.302339           | -3.30755                     | T down vs N                            | 10.499  | 13.4021   | 20.4245    | 1         |
| cg20070138  | FANCM                                   | 0.00675789        | 0.00675789           | 0.240886           | -4.15135                     | T down vs N                            | 9.663   | 18.9774   | 31.4226    | 1         |
| cg20075683  | CCNI2                                   | 2.29E-05          | 2.29E-05             | 3.17657            | 3.17657                      | T up vs N                              | 36.41   | 11.776    | 4.8514     | 1         |
| cg20078405  | MAP3K9                                  | 0.00175815        | 0.00175815           | 4.94496            | 4.94496                      | T up vs N                              | 14.042  | 23.9285   | 27.2661    | 1         |
| cg20078817  | RFPL3S;RFPL3S                           | 1.82E-07          | 1.82E-07             | 0.120389           | -8.30639                     | T down vs N                            | 75.806  | 41.9772   | 8.85996    | 1         |
| cg20080006  | WWTR1;WWTR1;WWTR1                       | 0.00017424        | 0.000174236          | 19.8148            | 19.8148                      | T up vs N                              | 23.606  | 83.5345   | 56.6183    | 1         |
| cg20082904  | TMEM61;TMEM61                           | 5.39E-05          | 5.39E-05             | 3.46409            | 3.46409                      | T up vs N                              | 29.655  | 14.4583   | 7.8008     | 1         |
| cg20084079  | OR4A15                                  | 2.06E-05          | 2.06E-05             | 0.25013            | -3.99792                     | T down vs N                            | 35.326  | 17.9865   | 8.14662    | 1         |
| cg20084652  | CHID1;CHID1;CHID1;CHID1;CHID1           | 0.00100382        | 0.00100382           | 0.284749           | -3.51187                     | T down vs N                            | 16.106  | 14.779    | 14.682     | 1         |
| cg20088756  | BEGAIN;BEGAIN                           | 0.00161839        | 0.00161839           | 0.328408           | -3.04499                     | T down vs N                            | 14.337  | 11.6129   | 12.9598    | 1         |
| cg20089095  | SENP2                                   | 0.00134243        | 0.00134243           | 0.225023           | -4.44399                     | T down vs N                            | 15.016  | 20.8372   | 22.2022    | 1         |
| cg20090108  | GRM5;GRM5                               | 0.00050457        | 0.000504572          | 3.31421            | 3.31421                      | T up vs N                              | 18.853  | 13.4473   | 11.4125    | 1         |
| cg20090162  | TTC7A                                   | 4.22E-07          | 4.22E-07             | 0.130232           | -7.67863                     | T down vs N                            | 66.731  | 38.9186   | 9.33154    | 1         |
| cg20090497  | TAS2R9                                  | 0.00017812        | 0.000178118          | 0.285194           | -3.50639                     | T down vs N                            | 23.501  | 14.7422   | 10.0367    | 1         |
| cg20093139  | PDLIM1                                  | 0.00033603        | 0.000336026          | 0.185617           | -5.38745                     | T down vs N                            | 20.594  | 26.5633   | 20.6374    | 1         |
| cg20094462  | PRTN3                                   | 0.00043703        | 0.000437025          | 0.248039           | -4.03163                     | T down vs N                            | 19.458  | 18.2051   | 14.9697    | 1         |
| cg20095656  | PFN3                                    | 4.17E-06          | 4.17E-06             | 8.85797            | 8.85797                      | T up vs N                              | 46.42   | 44.5656   | 15.3607    | 1         |
| cg20099806  | CCDC47                                  | 2.36E-07          | 2.36E-07             | 0.204629           | -4.8869                      | T down vs N                            | 72.901  | 23.5762   | 5.17439    | 1         |
| cg20099968  | KIAA1530                                | 0.00252965        | 0.00252965           | 0.307441           | -3.25266                     | T down vs N                            | 12.78   | 13.0298   | 16.3125    | 1         |
| cg20102336  | OAS3                                    | 0.00029293        | 0.000292927          | 0.273745           | -3.65304                     | T down vs N                            | 21.203  | 15.7208   | 11.8631    | 1         |
| cg20102877  | KRTCAP3;KRTCAP3                         | 8.51E-06          | 8.51E-06             | 7.65038            | 7.65038                      | T up vs N                              | 41.186  | 38.778    | 15.0647    | 1         |
| cg20108600  | TRMT12;TRMT12                           | 2.61E-05          | 2.61E-05             | 0.243649           | -4.10427                     | T down vs N                            | 33.868  | 18.6745   | 8.82233    | 1         |
| cg20108693  | SLURP1;SLURP1                           | 1.10E-05          | 1.10E-05             | 0.238902           | -4.18582                     | T down vs N                            | 39.445  | 19.1985   | 7.78744    | 1         |
| cg20109233  | RBM19;RBM19;RBM19                       | 0.0002971         | 0.000297095          | 0.314264           | -3.18204                     | T down vs N                            | 21.14   | 12.5493   | 9.49808    | 1         |

| Probeset ID | UCSC_REFGENE_NAME       | p-value<br>(Type) | p-value (T vs.<br>N) | Ratio (T<br>vs. N) | Fold-<br>Change (T<br>vs. N) | Fold-Change (T vs.<br>N) (Description) | F(Type) | SS (Type) | SS (Error) | F (Error) |
|-------------|-------------------------|-------------------|----------------------|--------------------|------------------------------|----------------------------------------|---------|-----------|------------|-----------|
| cg20111978  | RIMBP2                  | 2.44E-06          | 2.44E-06             | 0.139237           | -7.18202                     | T down vs N                            | 53.883  | 34.2659   | 9.53893    | 1         |
| cg20115117  | FOXP1;FOXP1             | 7.89E-05          | 7.89E-05             | 0.305039           | -3.27827                     | T down vs N                            | 27.588  | 13.2037   | 7.6576     | 1         |
| cg20116805  | HOTAIR                  | 1.18E-06          | 1.18E-06             | 0.23314            | -4.28926                     | T down vs N                            | 56.904  | 19.8588   | 5.58384    | 1         |
| cg20117742  | LAIR1;LAIR1             | 1.30E-05          | 1.30E-05             | 0.224461           | -4.45511                     | T down vs N                            | 38.301  | 20.9071   | 8.73388    | 1         |
| cg20119487  | BEST1;BEST1             | 5.11E-06          | 5.11E-06             | 6.70322            | 6.70322                      | T up vs N                              | 44.873  | 33.904    | 12.0889    | 1         |
| cg20119745  | RNF39;RNF39             | 0.00014601        | 0.000146007          | 4.28291            | 4.28291                      | T up vs N                              | 24.461  | 19.8184   | 12.9632    | 1         |
| cg20122043  | OPCML                   | 0.00046681        | 0.000466809          | 0.324695           | -3.07981                     | T down vs N                            | 19.179  | 11.8513   | 9.88688    | 1         |
| cg20123637  | TF                      | 0.0025933         | 0.0025933            | 3.0635             | 3.0635                       | T up vs N                              | 12.696  | 11.7396   | 14.7945    | 1         |
| cg20125920  | C10orf140               | 0.00189741        | 0.00189741           | 0.325089           | -3.07608                     | T down vs N                            | 13.772  | 11.8258   | 13.7387    | 1         |
| cg20126775  | DEFB133                 | 1.79E-07          | 1.79E-07             | 0.2817             | -3.54988                     | T down vs N                            | 75.977  | 15.0333   | 3.16586    | 1         |
| cg20128365  | MED30                   | 0.00087238        | 0.00087238           | 0.264872           | -3.77541                     | T down vs N                            | 16.647  | 16.5306   | 15.8887    | 1         |
| cg20130789  | AKR1C4                  | 4.97E-05          | 4.97E-05             | 0.226226           | -4.42036                     | T down vs N                            | 30.109  | 20.6884   | 10.9938    | 1         |
| cg20131968  | CCDC47                  | 1.76E-06          | 1.76E-06             | 0.273905           | -3.6509                      | T down vs N                            | 53.404  | 15.7067   | 4.70578    | 1         |
| cg20134658  | C20orf11                | 0.00028745        | 0.000287448          | 0.167797           | -5.95959                     | T down vs N                            | 21.288  | 29.8427   | 22.4301    | 1         |
| cg20138404  | CAPN1                   | 6.26E-07          | 6.26E-07             | 5.01525            | 5.01525                      | T up vs N                              | 62.806  | 24.353    | 6.20397    | 1         |
| cg20140054  | UBXN1                   | 0.00012535        | 0.000125346          | 0.301792           | -3.31354                     | T down vs N                            | 25.214  | 13.4428   | 8.53023    | 1         |
| cg20141434  | REXO1L2P                | 0.00019888        | 0.00019888           | 0.176448           | -5.66738                     | T down vs N                            | 22.979  | 28.1854   | 19.625     | 1         |
| cg20141817  | SPRR2G                  | 3.48E-06          | 3.48E-06             | 0.14488            | -6.90226                     | T down vs N                            | 47.813  | 34.9549   | 11.6973    | 1         |
| cg20142762  | NCR1;NCR1;NCR1;NCR1     | 4.64E-05          | 4.64E-05             | 0.26534            | -3.76875                     | T down vs N                            | 30.493  | 16.4868   | 8.65067    | 1         |
| cg20143859  | SEC11C                  | 4.16E-06          | 4.16E-06             | 0.204163           | -4.89805                     | T down vs N                            | 46.425  | 23.644    | 8.14867    | 1         |
| cg20146030  | GALNT3                  | 0.00112886        | 0.00112886           | 6.0452             | 6.0452                       | T up vs N                              | 15.661  | 30.3215   | 30.9785    | 1         |
| cg20146909  | LRRCD8;LRRCD8           | 0.0011695         | 0.0011695            | 0.322868           | -3.09724                     | T down vs N                            | 15.528  | 11.9705   | 12.3344    | 1         |
| cg20149170  | EPHB2;EPHB2             | 6.65E-06          | 6.65E-06             | 0.16902            | -5.91645                     | T down vs N                            | 42.939  | 29.6003   | 11.0298    | 1         |
| cg20149359  | HIVEP3;HIVEP3           | 1.46E-07          | 1.46E-07             | 0.25555            | -3.91314                     | T down vs N                            | 78.336  | 17.4344   | 3.56093    | 1         |
| cg20154143  | PRDM16;PRDM16           | 0.00220562        | 0.00220562           | 0.264736           | -3.77735                     | T down vs N                            | 13.248  | 16.5435   | 19.9795    | 1         |
| cg20154618  | CREB3L3;CREB3L3         | 0.0036326         | 0.0036326            | 0.243885           | -4.10029                     | T down vs N                            | 11.584  | 18.6488   | 25.7572    | 1         |
| cg20156237  | ZC3H3                   | 5.16E-05          | 5.16E-05             | 0.322628           | -3.09955                     | T down vs N                            | 29.898  | 11.9862   | 6.41442    | 1         |
| cg20157753  | IL1B;IL1B               | 8.45E-05          | 8.45E-05             | 0.161666           | -6.18561                     | T down vs N                            | 27.232  | 31.1004   | 18.2731    | 1         |
| cg20164479  | MYH8                    | 0.00539762        | 0.00539762           | 0.239242           | -4.17987                     | T down vs N                            | 10.34   | 19.1604   | 29.648     | 1         |
| cg20165520  | MCF2L;MCF2L             | 0.00187707        | 0.00187707           | 3.10553            | 3.10553                      | T up vs N                              | 13.81   | 12.0272   | 13.9344    | 1         |
| cg20165746  | ERI1                    | 0.00017887        | 0.000178874          | 0.283965           | -3.52156                     | T down vs N                            | 23.481  | 14.8439   | 10.1147    | 1         |
| cg20166931  | DPP6;DPP6;DPP6          | 0.00012473        | 0.000124733          | 0.323741           | -3.08889                     | T down vs N                            | 25.239  | 11.9134   | 7.55244    | 1         |
| cg20169185  | WFDC9                   | 7.47E-06          | 7.47E-06             | 0.252938           | -3.95355                     | T down vs N                            | 42.104  | 17.6979   | 6.72546    | 1         |
| cg20170777  | COX10                   | 4.94E-06          | 4.94E-06             | 0.148682           | -6.72577                     | T down vs N                            | 45.134  | 34.0238   | 12.0614    | 1         |
| cg20170989  | POM121L12               | 5.43E-05          | 5.43E-05             | 0.198859           | -5.02869                     | T down vs N                            | 29.615  | 24.4339   | 13.2007    | 1         |
| cg20171429  | C7orf63;C7orf63         | 7.87E-05          | 7.87E-05             | 0.303179           | -3.29838                     | T down vs N                            | 27.607  | 13.34     | 7.73142    | 1         |
| cg20173059  | TTC12;TTC12             | 4.36E-05          | 4.36E-05             | 22.2581            | 22.2581                      | T up vs N                              | 30.846  | 90.1661   | 46.7704    | 1         |
| cg20173065  | ANXA5                   | 0.00014246        | 0.000142458          | 0.252966           | -3.95309                     | T down vs N                            | 24.582  | 17.695    | 11.5176    | 1         |
| cg20173428  | ASCL4                   | 8.78E-05          | 8.78E-05             | 0.154662           | -6.46573                     | T down vs N                            | 27.031  | 32.6306   | 19.3148    | 1         |
| cg20173984  | KIAA1009                | 0.00049486        | 0.00049486           | 0.205501           | -4.86616                     | T down vs N                            | 18.934  | 23.4499   | 19.8162    | 1         |
| cg20174636  | SPEG                    | 0.00271496        | 0.00271496           | 6.15667            | 6.15667                      | T up vs N                              | 12.542  | 30.9405   | 39.4711    | 1         |
| cg20176971  | C11orf88;C11orf88       | 0.0004097         | 0.000409704          | 0.30388            | -3.29077                     | T down vs N                            | 19.734  | 13.2884   | 10.7742    | 1         |
| cg20176989  | KIR3DL2                 | 0.0001268         | 0.000126804          | 0.182221           | -5.48785                     | T down vs N                            | 25.157  | 27.1491   | 17.2672    | 1         |
| cg20178075  | HTR3A;HTR3A;HTR3A       | 2.21E-05          | 2.21E-05             | 0.155239           | -6.44166                     | T down vs N                            | 34.89   | 32.5003   | 14.9041    | 1         |
| cg20181079  | OR4D11                  | 0.00018768        | 0.000187683          | 0.243365           | -4.10905                     | T down vs N                            | 23.253  | 18.7052   | 12.871     | 1         |
| cg20182232  | C3orf30;IGSF11          | 0.00072741        | 0.000727407          | 0.273696           | -3.65369                     | T down vs N                            | 17.362  | 15.7252   | 14.4919    | 1         |
| cg20188621  | TAF5                    | 5.22E-06          | 5.22E-06             | 0.166748           | -5.99706                     | T down vs N                            | 44.723  | 30.0527   | 10.7515    | 1         |
| cg20189761  | REXO1L2P;REXO1L1        | 1.12E-05          | 1.12E-05             | 0.286068           | -3.49567                     | T down vs N                            | 39.273  | 14.6703   | 5.97678    | 1         |
| cg20190025  | TRIM50                  | 0.00022653        | 0.000226534          | 0.32671            | -3.06081                     | T down vs N                            | 22.372  | 11.7213   | 8.38273    | 1         |
| cg20190649  | SKAP1;SKAP1             | 8.59E-06          | 8.59E-06             | 0.107954           | -9.26317                     | T down vs N                            | 41.125  | 46.412    | 18.0568    | 1         |
| cg20193872  | CRY1                    | 2.35E-06          | 2.35E-06             | 0.293861           | -3.40297                     | T down vs N                            | 50.968  | 14.047    | 4.40969    | 1         |
| cg20194050  | STK19;STK19;DOM3Z;STK19 | 8.65E-05          | 8.65E-05             | 0.220426           | -4.53668                     | T down vs N                            | 28.251  | 20.158    | 10.7031    | 1         |
| cg20194689  | COL23A1                 | 0.00238224        | 0.00238224           | 3.11827            | 3.11827                      | T up vs N                              | 12.984  | 12.1142   | 14.9279    | 1         |
| cg20194973  | MLC1;MLC1               | 2.67E-05          | 2.67E-05             | 0.189892           | -5.26615                     | T down vs N                            | 33.742  | 25.8498   | 12.2576    | 1         |
| cg20195272  | MTMR2;MTMR2;MTMR2;MTMR2 | 1.56E-05          | 1.56E-05             | 0.128533           | -7.7801                      | T down vs N                            | 37.099  | 39.4216   | 17.0015    | 1         |
| cg20199836  | FFAR2                   | 0.00140691        | 0.00140691           | 0.313937           | -3.18535                     | T down vs N                            | 14.844  | 12.5719   | 13.5507    | 1         |
| cg20201673  | FLJ30058                | 0.00041478        | 0.000414781          | 3.43327            | 3.43327                      | T up vs N                              | 19.681  | 14.2512   | 11.5858    | 1         |
| cg20207567  | NEIL2;NEIL2;NEIL2;NEIL2 | 1.25E-05          | 1.25E-05             | 0.236164           | -4.23434                     | T down vs N                            | 38.566  | 19.5089   | 8.09377    | 1         |
| cg20211463  | SLC05A1;SLC05A1;SLC05A1 | 0.00125484        | 0.00125484           | 7.27131            | 7.27131                      | T up vs N                              | 15.266  | 36.8652   | 38.639     | 1         |
| cg20211778  | ANKRD30A                | 0.00013863        | 0.000138628          | 0.292959           | -3.41344                     | T down vs N                            | 24.715  | 14.1176   | 9.13931    | 1         |
| cg20213166  | ORS2B2                  | 0.00010546        | 0.000105463          | 0.106928           | -9.35207                     | T down vs N                            | 26.085  | 46.8111   | 28.7131    | 1         |
| cg20217702  | AMOTL2                  | 0.00577361        | 0.00577361           | 0.322183           | -3.10383                     | T down vs N                            | 10.135  | 12.0155   | 18.9686    | 1         |
| cg20218460  | LRRFIP1                 | 6.34E-06          | 6.34E-06             | 0.286475           | -3.4907                      | T down vs N                            | 43.287  | 14.637    | 5.41029    | 1         |
| cg20220678  | SH2D4A                  | 7.34E-06          | 7.34E-06             | 0.24859            | -4.02269                     | T down vs N                            | 42.23   | 18.1472   | 6.87558    | 1         |
| cg20223687  | PTPRN2;PTPRN2;PTPRN2    | 0.00510693        | 0.00510693           | 0.245028           | -4.08116                     | T down vs N                            | 10.51   | 18.5254   | 28.202     | 1         |
| cg20225745  | KRT80;KRT80             | 5.77E-06          | 5.77E-06             | 0.158883           | -6.29393                     | T down vs N                            | 43.975  | 31.6958   | 11.5323    | 1         |
| cg20227592  | PLXNA4                  | 0.00133422        | 0.00133422           | 0.329367           | -3.03613                     | T down vs N                            | 15.039  | 11.5522   | 12.2905    | 1         |
| cg20227627  | PRKCE                   | 0.00168065        | 0.00168065           | 0.283366           | -3.52901                     | T down vs N                            | 14.202  | 14.8937   | 16.7793    | 1         |
| cg20228731  | FLJ43663;FLJ43663       | 0.0001553         | 0.000155295          | 0.167222           | -5.98009                     | T down vs N                            | 24.161  | 29.9577   | 19.839     | 1         |
| cg20229014  | ST3GAL1;ST3GAL1         | 0.00107132        | 0.00107132           | 0.248921           | -4.01733                     | T down vs N                            | 15.858  | 18.1125   | 18.2745    | 1         |
| cg20235075  | EOMES                   | 0.00197268        | 0.00197268           | 0.278194           | -3.59461                     | T down vs N                            | 13.636  | 15.332    | 17.9903    | 1         |
| cg20235871  | PTPRN2;PTPRN2;PTPRN2    | 0.00019956        | 0.000199555          | 0.304298           | -3.28625                     | T down vs N                            | 22.963  | 13.2578   | 9.23753    | 1         |

| Probeset ID | UCSC_REFGENE_NAME             | p-value<br>(Type) | p-value (T vs.<br>N) | Ratio (T<br>vs. N) | Fold-<br>Change (T<br>vs. N) | Fold-Change (T vs.<br>N) (Description) | F(Type) | SS (Type) | SS (Error) | F (Error) |
|-------------|-------------------------------|-------------------|----------------------|--------------------|------------------------------|----------------------------------------|---------|-----------|------------|-----------|
| cg20237595  | KALRN                         | 0.00090723        | 0.000907232          | 0.317099           | -3.15359                     | T down vs N                            | 16.495  | 12.3553   | 11.9849    | 1         |
| cg20238105  | LOC100124692                  | 1.27E-05          | 1.27E-05             | 0.250183           | -3.99708                     | T down vs N                            | 38.45   | 17.981    | 7.48243    | 1         |
| cg20238308  | PTPRQ                         | 0.00227098        | 0.00227098           | 0.293238           | -3.4102                      | T down vs N                            | 13.148  | 14.0958   | 17.1535    | 1         |
| cg20239565  | HEXDC                         | 0.00049385        | 0.000493852          | 0.25866            | -3.86608                     | T down vs N                            | 18.943  | 17.1265   | 14.4661    | 1         |
| cg20240736  | SAFB2                         | 0.00026244        | 0.000262443          | 0.275737           | -3.62664                     | T down vs N                            | 21.698  | 15.5453   | 11.4629    | 1         |
| cg20241952  | CBX2;CBX2                     | 1.68E-05          | 1.68E-05             | 0.275387           | -3.63126                     | T down vs N                            | 36.64   | 15.5761   | 6.80183    | 1         |
| cg20242778  | MOSC1                         | 2.41E-05          | 2.41E-05             | 8.47208            | 8.47208                      | T up vs N                              | 34.35   | 42.7641   | 19.9192    | 1         |
| cg20242781  | CPVL;CPVL                     | 5.50E-05          | 5.50E-05             | 0.276819           | -3.61247                     | T down vs N                            | 29.54   | 15.451    | 8.36872    | 1         |
| cg20244649  | KIR3DL1                       | 7.38E-06          | 7.38E-06             | 0.251763           | -3.97199                     | T down vs N                            | 42.192  | 17.818    | 6.7569     | 1         |
| cg20249327  | RNF39;RNF39                   | 0.00054264        | 0.000542637          | 3.80138            | 3.80138                      | T up vs N                              | 18.551  | 16.7017   | 14.4053    | 1         |
| cg20250722  | HCG11                         | 1.87E-05          | 1.87E-05             | 7.308              | 7.308                        | T up vs N                              | 35.954  | 37.0525   | 16.489     | 1         |
| cg20251156  | OR6C65                        | 2.37E-05          | 2.37E-05             | 0.256313           | -3.90147                     | T down vs N                            | 34.459  | 17.3582   | 8.05971    | 1         |
| cg20253251  | MSTO1                         | 3.62E-06          | 3.62E-06             | 0.246141           | -4.06272                     | T down vs N                            | 47.507  | 18.4063   | 6.1991     | 1         |
| cg20253689  | AFF3;AFF3                     | 0.00059005        | 0.000590046          | 3.24637            | 3.24637                      | T up vs N                              | 18.206  | 12.987    | 11.4133    | 1         |
| cg20254225  | CYP1B1                        | 0.00394621        | 0.00394621           | 4.53764            | 4.53764                      | T up vs N                              | 11.319  | 21.4239   | 30.2845    | 1         |
| cg20255713  | APOF                          | 3.51E-05          | 3.51E-05             | 0.2072             | -4.82626                     | T down vs N                            | 32.096  | 23.2065   | 11.5687    | 1         |
| cg20256009  | S100A8                        | 2.66E-05          | 2.66E-05             | 0.151157           | -6.61562                     | T down vs N                            | 33.754  | 33.4368   | 15.8498    | 1         |
| cg20257553  | PLA2R1;PLA2R1                 | 3.75E-05          | 3.75E-05             | 7.19905            | 7.19905                      | T up vs N                              | 31.708  | 36.495    | 18.4157    | 1         |
| cg20257821  | DLGAP2                        | 0.0005199         | 0.000519896          | 0.236437           | -4.22946                     | T down vs N                            | 18.728  | 19.4777   | 16.6404    | 1         |
| cg20258698  | TNS3                          | 2.16E-05          | 2.16E-05             | 0.200472           | -4.98822                     | T down vs N                            | 35.033  | 24.19     | 11.048     | 1         |
| cg20261167  | SPP1;SPP1;SPP1;SPP1;SPP1;SPP1 | 0.00035781        | 0.000357808          | 0.275583           | -3.62867                     | T down vs N                            | 20.319  | 15.5588   | 12.2515    | 1         |
| cg20262683  | NPTX2                         | 0.00064805        | 0.000648047          | 0.259305           | -3.85647                     | T down vs N                            | 17.825  | 17.0635   | 15.3165    | 1         |
| cg20264732  | ESRP2                         | 7.29E-06          | 7.29E-06             | 4.95274            | 4.95274                      | T up vs N                              | 42.28   | 23.9756   | 9.0731     | 1         |
| cg20266715  | CAPN2                         | 6.86E-05          | 6.86E-05             | 0.210973           | -4.73994                     | T down vs N                            | 28.337  | 22.6775   | 12.8046    | 1         |
| cg20267322  | C1orf198;C1orf198;C1orf198    | 0.00036993        | 0.000369928          | 0.206227           | -4.84903                     | T down vs N                            | 20.174  | 23.3455   | 18.5151    | 1         |
| cg20267718  | SLC35F3                       | 6.39E-06          | 6.39E-06             | 0.270967           | -3.69049                     | T down vs N                            | 43.233  | 15.9693   | 5.9101     | 1         |
| cg20268857  | OR6K3                         | 9.27E-06          | 9.27E-06             | 0.139904           | -7.14776                     | T down vs N                            | 40.592  | 36.2311   | 14.2811    | 1         |
| cg20272287  | MIR1180;B9D1                  | 7.35E-05          | 7.35E-05             | 0.137147           | -7.29146                     | T down vs N                            | 27.968  | 36.9682   | 21.1489    | 1         |
| cg20272884  | STC1                          | 2.25E-05          | 2.25E-05             | 0.267628           | -3.73654                     | T down vs N                            | 34.788  | 16.2741   | 7.48499    | 1         |
| cg20272962  | LPO;LPO;LPO                   | 0.0020242         | 0.0020242            | 3.07917            | 3.07917                      | T up vs N                              | 13.546  | 11.8469   | 13.9933    | 1         |
| cg20272979  | ITPKA                         | 8.00E-06          | 8.00E-06             | 5.21153            | 5.21153                      | T up vs N                              | 41.621  | 25.5264   | 9.81291    | 1         |
| cg20273260  | LYPD1;LYPD1                   | 3.45E-05          | 3.45E-05             | 0.264613           | -3.7791                      | T down vs N                            | 32.194  | 16.555    | 8.22755    | 1         |
| cg20274267  | TNFRSF8                       | 0.00158537        | 0.00158537           | 0.229021           | -4.36641                     | T down vs N                            | 14.411  | 20.348    | 22.5913    | 1         |
| cg20278269  | LRP5                          | 1.46E-05          | 1.46E-05             | 0.187819           | -5.32427                     | T down vs N                            | 37.513  | 26.1925   | 11.1716    | 1         |
| cg20281583  | NEIL3                         | 0.00043212        | 0.000432121          | 0.224899           | -4.44645                     | T down vs N                            | 19.506  | 20.8526   | 17.1045    | 1         |
| cg20282913  | PSMD13;PSMD13                 | 0.0006951         | 0.000695104          | 0.215183           | -4.64721                     | T down vs N                            | 17.543  | 22.1052   | 20.1609    | 1         |
| cg20284999  | MS4A6A;MS4A6A;MS4A6A          | 3.90E-05          | 3.90E-05             | 0.284631           | -3.51332                     | T down vs N                            | 31.492  | 14.7886   | 7.51367    | 1         |
| cg20286236  | MIR193A                       | 0.00558856        | 0.00558856           | 11.5005            | 11.5005                      | T up vs N                              | 10.234  | 55.8718   | 87.3502    | 1         |
| cg20287050  | C17orf67                      | 5.05E-05          | 5.05E-05             | 0.252149           | -3.9659                      | T down vs N                            | 30.018  | 17.7784   | 9.47615    | 1         |
| cg20288000  | CASZ1;CASZ1                   | 2.02E-05          | 2.02E-05             | 0.261564           | -3.82315                     | T down vs N                            | 35.449  | 16.8449   | 7.60292    | 1         |
| cg20289949  | HAAO                          | 0.00428478        | 0.00428478           | 5.14229            | 5.14229                      | T up vs N                              | 11.058  | 25.1144   | 36.34      | 1         |
| cg20291222  | GLIPR1L2                      | 3.99E-07          | 3.99E-07             | 0.325676           | -3.07054                     | T down vs N                            | 67.318  | 11.7878   | 2.80169    | 1         |
| cg20291363  | NKAIN1                        | 0.000339          | 0.000339002          | 0.331603           | -3.01565                     | T down vs N                            | 20.556  | 11.4118   | 8.88272    | 1         |
| cg20296924  | COLEC11;COLEC11               | 0.00366526        | 0.00366526           | 0.269847           | -3.70581                     | T down vs N                            | 11.556  | 16.0708   | 22.252     | 1         |
| cg20302533  | POU6F2;POU6F2                 | 0.00082784        | 0.00082784           | 0.25941            | -3.8549                      | T down vs N                            | 16.851  | 17.0533   | 16.1921    | 1         |
| cg20303399  | ADRA1A;ADRA1A;ADRA1A;ADRA1A   | 0.00016586        | 0.000165861          | 9.54773            | 9.54773                      | T up vs N                              | 23.843  | 47.6822   | 31.998     | 1         |
| cg20305489  | SEPT9;SEPT9;SEPT9             | 1.35E-05          | 1.35E-05             | 0.184659           | -5.41539                     | T down vs N                            | 38.067  | 26.7268   | 11.2335    | 1         |
| cg20306025  | ZNF479                        | 2.22E-05          | 2.22E-05             | 0.167026           | -5.98707                     | T down vs N                            | 34.876  | 29.9968   | 13.7614    | 1         |
| cg20308679  | FRZB;FRZB                     | 0.00209024        | 0.00209024           | 17.2713            | 17.2713                      | T up vs N                              | 13.434  | 76.0257   | 90.5463    | 1         |
| cg20310100  | LRP5                          | 2.22E-06          | 2.22E-06             | 0.268504           | -3.72434                     | T down vs N                            | 51.43   | 16.1935   | 5.0378     | 1         |
| cg20312687  | DEFB118                       | 1.55E-05          | 1.55E-05             | 0.153674           | -6.50729                     | T down vs N                            | 37.126  | 32.855    | 14.1595    | 1         |
| cg20312916  | KLHL34                        | 0.00082036        | 0.000820357          | 19.4931            | 19.4931                      | T up vs N                              | 16.887  | 82.6212   | 78.2836    | 1         |
| cg20315739  | PLA2G4E                       | 0.0030193         | 0.0030193            | 0.314609           | -3.17855                     | T down vs N                            | 12.188  | 12.5255   | 16.4427    | 1         |
| cg20318156  | LPPR5;LPPR5                   | 0.00045282        | 0.000452823          | 0.288189           | -3.46994                     | T down vs N                            | 19.308  | 14.4977   | 12.0141    | 1         |
| cg20318166  | ALPK3                         | 1.43E-05          | 1.43E-05             | 14.4218            | 14.4218                      | T up vs N                              | 37.662  | 66.7074   | 28.3397    | 1         |
| cg20318580  | TNFAIP8L3                     | 1.43E-05          | 1.43E-05             | 0.324764           | -3.07916                     | T down vs N                            | 37.662  | 11.8468   | 5.03296    | 1         |
| cg20320656  | LETMD1;LETMD1                 | 0.00027382        | 0.000273819          | 0.208946           | -4.78593                     | T down vs N                            | 21.506  | 22.9598   | 17.0814    | 1         |
| cg20320823  | OR2C3                         | 0.00055137        | 0.000551367          | 0.311496           | -3.21031                     | T down vs N                            | 18.485  | 12.7419   | 11.0291    | 1         |
| cg20321265  | PADI1                         | 0.0005922         | 0.000592202          | 0.287386           | -3.47964                     | T down vs N                            | 18.191  | 14.5628   | 12.8086    | 1         |
| cg20325850  | PPAP2B;PPAP2B                 | 4.74E-05          | 4.74E-05             | 3.32262            | 3.32262                      | T up vs N                              | 30.373  | 13.5042   | 7.1138     | 1         |
| cg20326682  | PRKCA                         | 0.00036727        | 0.000367267          | 0.253888           | -3.93875                     | T down vs N                            | 20.206  | 17.6015   | 13.9379    | 1         |
| cg20327845  | PFKP                          | 0.00098699        | 0.000986991          | 0.191179           | -5.2307                      | T down vs N                            | 16.17   | 25.64     | 25.3701    | 1         |
| cg20331288  | CNPY1                         | 8.53E-08          | 8.53E-08             | 0.23793            | -4.20292                     | T down vs N                            | 84.816  | 19.308    | 3.64231    | 1         |
| cg20332195  | ZNF518B                       | 0.00204504        | 0.00204504           | 3.35115            | 3.35115                      | T up vs N                              | 13.51   | 13.6972   | 16.2216    | 1         |
| cg20333836  | PAQR6;PAQR6                   | 3.47E-05          | 3.47E-05             | 4.56843            | 4.56843                      | T up vs N                              | 32.174  | 21.6159   | 10.7494    | 1         |
| cg20334836  | GRK4;GRK4;GRK4                | 0.00245306        | 0.00245306           | 0.177545           | -5.63239                     | T down vs N                            | 12.885  | 27.9845   | 34.7513    | 1         |
| cg20335425  | S100A8                        | 9.51E-06          | 9.51E-06             | 0.196152           | -5.0981                      | T down vs N                            | 40.414  | 24.8504   | 9.83829    | 1         |
| cg20337959  | FIGLA                         | 9.03E-05          | 9.03E-05             | 0.250418           | -3.99333                     | T down vs N                            | 26.884  | 17.9567   | 10.6868    | 1         |
| cg20338182  | HEPACAM2                      | 0.0022634         | 0.0022634            | 0.33266            | -3.00608                     | T down vs N                            | 13.159  | 11.3462   | 13.7954    | 1         |
| cg20339720  | PRR5;PRR5;PRR5;PRR5           | 5.96E-06          | 5.96E-06             | 0.225682           | -4.43101                     | T down vs N                            | 43.734  | 20.7555   | 7.59335    | 1         |
| cg20341836  | HCG4P6                        | 0.00128014        | 0.00128014           | 4.96726            | 4.96726                      | T up vs N                              | 15.192  | 24.0634   | 25.344     | 1         |

| Probeset ID | UCSC_REFGENE_NAME                   | p-value<br>(Type) | p-value (T vs.<br>N) | Ratio (T<br>vs. N) | Fold-<br>Change (T<br>vs. N) | Fold-Change (T vs.<br>N) (Description) | F(Type) | SS (Type) | SS (Error) | F (Error) |
|-------------|-------------------------------------|-------------------|----------------------|--------------------|------------------------------|----------------------------------------|---------|-----------|------------|-----------|
| cg20348196  | HLA-DRA                             | 4.41E-06          | 4.41E-06             | 0.110245           | -9.07074                     | T down vs N                            | 45.991  | 45.5407   | 15.8435    | 1         |
| cg20353653  | ZSCAN2;ZSCAN2;ZSCAN2                | 2.40E-05          | 2.40E-05             | 0.314975           | -3.17486                     | T down vs N                            | 34.383  | 12.5004   | 5.81706    | 1         |
| cg20357397  | SAA4                                | 1.63E-06          | 1.63E-06             | 0.287055           | -3.48366                     | T down vs N                            | 54.053  | 14.5898   | 4.31866    | 1         |
| cg20361540  | VPS37B                              | 0.00497224        | 0.00497224           | 6.29065            | 6.29065                      | T up vs N                              | 10.593  | 31.6778   | 47.8486    | 1         |
| cg20366397  | FHIT;FHIT                           | 0.000452          | 0.000452002          | 0.232391           | -4.3031                      | T down vs N                            | 19.315  | 19.9467   | 16.5232    | 1         |
| cg20367065  | OR5H6                               | 6.25E-05          | 6.25E-05             | 0.193988           | -5.15497                     | T down vs N                            | 28.837  | 25.19     | 13.9763    | 1         |
| cg20367712  | GSX2                                | 0.00034828        | 0.000348282          | 4.07347            | 4.07347                      | T up vs N                              | 20.437  | 18.4757   | 14.4644    | 1         |
| cg20368283  | COL21A1                             | 0.0001643         | 0.000164299          | 4.81011            | 4.81011                      | T up vs N                              | 23.888  | 23.1078   | 15.4773    | 1         |
| cg20369513  | BAT2                                | 0.00032719        | 0.000327192          | 0.261036           | -3.83089                     | T down vs N                            | 20.712  | 16.8957   | 13.0522    | 1         |
| cg20370281  | VPS18                               | 0.00027866        | 0.000278659          | 0.133056           | -7.51561                     | T down vs N                            | 21.427  | 38.1036   | 28.4524    | 1         |
| cg20373081  | SIM1                                | 1.12E-05          | 1.12E-05             | 0.298056           | -3.35507                     | T down vs N                            | 39.296  | 13.7237   | 5.58788    | 1         |
| cg20378070  | DHX16;DHX16                         | 6.39E-05          | 6.39E-05             | 0.220745           | -4.53012                     | T down vs N                            | 28.72   | 21.3769   | 11.909     | 1         |
| cg20378687  | KPNA4                               | 7.11E-07          | 7.11E-07             | 0.262023           | -3.81646                     | T down vs N                            | 61.585  | 16.8009   | 4.36492    | 1         |
| cg20379760  | LRFN2                               | 2.91E-06          | 2.91E-06             | 0.263468           | -3.79553                     | T down vs N                            | 49.245  | 16.6632   | 5.41399    | 1         |
| cg20380689  | GDNF;GDNF;GDNF                      | 0.00243377        | 0.00243377           | 3.46276            | 3.46276                      | T up vs N                              | 12.911  | 14.4495   | 17.9061    | 1         |
| cg20380975  | PHAX                                | 0.00103267        | 0.00103267           | 0.304543           | -3.28361                     | T down vs N                            | 15.998  | 13.2399   | 13.2419    | 1         |
| cg20382028  | MCM3AP                              | 0.00137344        | 0.00137344           | 0.288995           | -3.46027                     | T down vs N                            | 14.932  | 14.4327   | 15.4646    | 1         |
| cg20382831  | FLJ25363;FLJ25363                   | 0.00341877        | 0.00341877           | 0.324833           | -3.07851                     | T down vs N                            | 11.781  | 11.8424   | 16.0835    | 1         |
| cg20385970  | SNORD115-15;SNORD115-21;SNORD115-33 | 2.03E-05          | 2.03E-05             | 0.331058           | -3.02062                     | T down vs N                            | 35.419  | 11.4459   | 5.17057    | 1         |
| cg20389635  | PTHLH;PTHLH;PTHLH;PTHLH             | 0.00010015        | 0.000100148          | 0.191954           | -5.20958                     | T down vs N                            | 26.349  | 25.5148   | 15.4933    | 1         |
| cg20392842  | HLA-DMB                             | 0.00146508        | 0.00146508           | 0.203259           | -4.91983                     | T down vs N                            | 14.697  | 23.7762   | 25.8849    | 1         |
| cg20395646  | KDM2B;KDM2B                         | 0.0012435         | 0.0012435            | 0.31885            | -3.13627                     | T down vs N                            | 15.299  | 12.2371   | 12.7977    | 1         |
| cg20395892  | IRAK3;IRAK3                         | 0.004633          | 0.004633             | 3.58436            | 3.58436                      | T up vs N                              | 10.812  | 15.2637   | 22.5871    | 1         |
| cg20396436  | SYTL3                               | 0.00023977        | 0.000239772          | 0.265539           | -3.76592                     | T down vs N                            | 22.111  | 16.4681   | 11.9169    | 1         |
| cg20400904  | TCN1                                | 7.16E-06          | 7.16E-06             | 0.147382           | -6.78507                     | T down vs N                            | 42.412  | 34.3379   | 12.9539    | 1         |
| cg20403031  | ZNF280A;ZNF280A                     | 0.00010202        | 0.000102024          | 0.269285           | -3.71354                     | T down vs N                            | 26.254  | 16.1221   | 9.82521    | 1         |
| cg20403557  | LVRN                                | 2.32E-06          | 2.32E-06             | 15.1158            | 15.1158                      | T up vs N                              | 51.066  | 69.0779   | 21.6436    | 1         |
| cg20404150  | HSD17B1                             | 0.00051031        | 0.000510311          | 0.201855           | -4.95404                     | T down vs N                            | 18.806  | 23.9835   | 20.4054    | 1         |
| cg20406878  | NR5A2;NR5A2                         | 5.58E-06          | 5.58E-06             | 0.138447           | -7.22296                     | T down vs N                            | 44.224  | 36.6177   | 13.2482    | 1         |
| cg20408276  | CYP11B1                             | 0.00200097        | 0.00200097           | 3.29121            | 3.29121                      | T up vs N                              | 13.586  | 13.2914   | 15.6531    | 1         |
| cg20410409  | OR6K6                               | 9.30E-05          | 9.30E-05             | 0.22962            | -4.35503                     | T down vs N                            | 26.732  | 20.276    | 12.1357    | 1         |
| cg20414749  | DSTYK;DSTYK                         | 0.00410963        | 0.00410963           | 0.326973           | -3.05836                     | T down vs N                            | 11.19   | 11.7044   | 16.7362    | 1         |
| cg20417424  | ST6GALNAC5                          | 2.19E-05          | 2.19E-05             | 0.175103           | -5.71093                     | T down vs N                            | 34.948  | 28.4347   | 13.018     | 1         |
| cg20418125  | OPCML                               | 2.02E-05          | 2.02E-05             | 0.18603            | -5.37547                     | T down vs N                            | 35.442  | 26.4932   | 11.9603    | 1         |
| cg20418725  | CASP8;CASP8;CASP8;CASP8;CASP8       | 2.73E-06          | 2.73E-06             | 0.217878           | -4.58973                     | T down vs N                            | 49.735  | 21.7485   | 6.99655    | 1         |
| cg20422212  | EYA4;EYA4;EYA4                      | 0.00067711        | 0.00067711           | 0.252093           | -3.96679                     | T down vs N                            | 17.648  | 17.7842   | 16.1232    | 1         |
| cg20426415  | CYP2C18;CYP2C18                     | 4.10E-05          | 4.10E-05             | 0.234599           | -4.2626                      | T down vs N                            | 31.198  | 19.6891   | 10.0977    | 1         |
| cg20426710  | ZBED4                               | 0.00065182        | 0.000651815          | 0.276801           | -3.61271                     | T down vs N                            | 17.802  | 15.4526   | 13.8887    | 1         |
| cg20431250  | NR2E1                               | 5.92E-05          | 5.92E-05             | 0.216135           | -4.62674                     | T down vs N                            | 29.136  | 21.9784   | 12.0695    | 1         |
| cg20433580  | ADAM7                               | 0.00024685        | 0.000246854          | 0.331243           | -3.01894                     | T down vs N                            | 21.977  | 11.4343   | 8.3245     | 1         |
| cg20433822  | C10orf88                            | 4.21E-05          | 4.21E-05             | 0.255176           | -3.91886                     | T down vs N                            | 31.054  | 17.4718   | 9.00191    | 1         |
| cg20433989  | FNDC3A;FNDC3A                       | 0.00690555        | 0.00690555           | 0.281861           | -3.54785                     | T down vs N                            | 9.599   | 15.0198   | 25.0357    | 1         |
| cg20434422  | UOX                                 | 8.00E-05          | 8.00E-05             | 0.248107           | -4.03053                     | T down vs N                            | 27.521  | 18.198    | 10.5797    | 1         |
| cg20437604  | ANXA9;ANXA9                         | 3.48E-05          | 3.48E-05             | 0.302384           | -3.30705                     | T down vs N                            | 32.145  | 13.3988   | 6.66915    | 1         |
| cg20438277  | CD93                                | 1.11E-06          | 1.11E-06             | 0.136684           | -7.31614                     | T down vs N                            | 57.431  | 37.094    | 10.3342    | 1         |
| cg20438286  | GALNTL4                             | 5.06E-05          | 5.06E-05             | 0.246618           | -4.05486                     | T down vs N                            | 30.002  | 18.3554   | 9.7888     | 1         |
| cg20438306  | PHOX2B                              | 0.00485161        | 0.00485161           | 9.40644            | 9.40644                      | T up vs N                              | 10.669  | 47.0542   | 70.5675    | 1         |
| cg20442379  | IPMK                                | 1.91E-06          | 1.91E-06             | 0.199613           | -5.0097                      | T down vs N                            | 52.695  | 24.3196   | 7.38425    | 1         |
| cg20443278  | TBC1D16                             | 6.97E-05          | 6.97E-05             | 0.299348           | -3.34059                     | T down vs N                            | 28.25   | 13.6258   | 7.71741    | 1         |
| cg20443314  | VPS25                               | 7.34E-05          | 7.34E-05             | 0.225125           | -4.44197                     | T down vs N                            | 29.183  | 19.5995   | 10.0741    | 1         |
| cg20449145  | LOC642006                           | 1.12E-05          | 1.12E-05             | 0.331561           | -3.01603                     | T down vs N                            | 39.3    | 11.4144   | 4.6471     | 1         |
| cg20449404  | C3                                  | 6.76E-06          | 6.76E-06             | 0.179631           | -5.56696                     | T down vs N                            | 42.819  | 27.6074   | 10.3159    | 1         |
| cg20449659  | WT1;WT1;WT1;WT1                     | 0.00122148        | 0.00122148           | 3.00364            | 3.00364                      | T up vs N                              | 15.366  | 11.3294   | 11.7972    | 1         |
| cg20449692  | CLDN11                              | 0.00352014        | 0.00352014           | 5.49278            | 5.49278                      | T up vs N                              | 11.686  | 27.1777   | 37.2105    | 1         |
| cg20451680  | ESM1;ESM1                           | 7.67E-05          | 7.67E-05             | 0.240184           | -4.16347                     | T down vs N                            | 27.742  | 19.0552   | 10.9901    | 1         |
| cg20452714  | ARTN;ARTN;ARTN;ARTN;ARTN            | 0.00104605        | 0.00104605           | 13.7299            | 13.7299                      | T up vs N                              | 15.949  | 64.2724   | 64.4793    | 1         |
| cg20454486  | SIGLEC16                            | 8.63E-05          | 8.63E-05             | 0.321851           | -3.10703                     | T down vs N                            | 27.118  | 12.0374   | 7.10235    | 1         |
| cg20455197  | ADARB2                              | 1.99E-05          | 1.99E-05             | 0.142307           | -7.02704                     | T down vs N                            | 35.541  | 35.6063   | 16.0296    | 1         |
| cg20460852  | TNFRSF10A                           | 0.00052628        | 0.000526277          | 5.43119            | 5.43119                      | T up vs N                              | 18.677  | 26.8191   | 22.9745    | 1         |
| cg20463312  | HCN2                                | 0.00032128        | 0.000321279          | 3.51281            | 3.51281                      | T up vs N                              | 20.792  | 14.7853   | 11.3776    | 1         |
| cg20463808  | CDKL2                               | 0.00187805        | 0.00187805           | 0.322655           | -3.09929                     | T down vs N                            | 13.808  | 11.9845   | 13.8868    | 1         |
| cg20464143  | MYO10                               | 0.00021978        | 0.000219778          | 0.289229           | -3.45747                     | T down vs N                            | 22.513  | 14.4139   | 10.2442    | 1         |
| cg20464195  | HCG4P6                              | 9.20E-05          | 9.20E-05             | 3.96667            | 3.96667                      | T up vs N                              | 26.784  | 17.7834   | 10.6232    | 1         |
| cg20465661  | OR2T6                               | 1.92E-05          | 1.92E-05             | 0.189079           | -5.28879                     | T down vs N                            | 35.771  | 25.9835   | 11.6221    | 1         |
| cg20466478  | BRF2                                | 0.0002852         | 0.000285199          | 0.230923           | -4.33045                     | T down vs N                            | 21.323  | 20.1203   | 15.0976    | 1         |
| cg20467147  | OR11L1                              | 1.72E-06          | 1.72E-06             | 0.242363           | -4.12604                     | T down vs N                            | 53.595  | 18.8147   | 5.61688    | 1         |
| cg20468415  | ANK1;ANK1;ANK1;ANK1;ANK1            | 3.42E-06          | 3.42E-06             | 0.289925           | -3.44917                     | T down vs N                            | 47.943  | 14.3581   | 4.7917     | 1         |
| cg20469139  | RNF135;RNF135                       | 0.00121797        | 0.00121797           | 6.38049            | 6.38049                      | T up vs N                              | 15.376  | 32.1682   | 33.4729    | 1         |
| cg20471736  | SERPINB13                           | 4.71E-05          | 4.71E-05             | 0.134031           | -7.46097                     | T down vs N                            | 30.408  | 37.8284   | 19.9045    | 1         |
| cg20473977  | PDE4D                               | 2.71E-05          | 2.71E-05             | 0.295565           | -3.38335                     | T down vs N                            | 33.634  | 13.9147   | 6.61925    | 1         |

| Probeset ID | UCSC_REFGENE_NAME                 | p-value<br>(Type) | p-value (T vs.<br>N) | Ratio (T<br>vs. N) | Fold-<br>Change (T<br>vs. N) | Fold-Change (T vs.<br>N) (Description) | F(Type) | SS (Type) | SS (Error) | F (Error) |
|-------------|-----------------------------------|-------------------|----------------------|--------------------|------------------------------|----------------------------------------|---------|-----------|------------|-----------|
| cg20477005  | SLC26A10                          | 0.00086322        | 0.000863222          | 0.325068           | -3.07627                     | T down vs N                            | 16.688  | 11.8271   | 11.3398    | 1         |
| cg20477776  | TNXB                              | 1.62E-05          | 1.62E-05             | 0.212419           | -4.70767                     | T down vs N                            | 36.844  | 22.4788   | 9.76162    | 1         |
| cg20480899  | PRB2                              | 0.00011176        | 0.000111757          | 0.125747           | -7.9525                      | T down vs N                            | 25.791  | 40.2684   | 24.9818    | 1         |
|             | BCL2L14;BCL2L14;BCL2L14;BCL2L14;B |                   |                      |                    |                              |                                        |         |           |            |           |
| cg20481287  | CL2L14                            | 6.94E-05          | 6.94E-05             | 0.189536           | -5.27603                     | T down vs N                            | 28.277  | 25.9082   | 14.6596    | 1         |
| cg20481340  | GPR20                             | 0.00060714        | 0.000607142          | 0.281082           | -3.55768                     | T down vs N                            | 18.09   | 15.0855   | 13.3429    | 1         |
| cg20483374  | C1QTNF5;MFRP                      | 0.0001112         | 0.000111198          | 0.238402           | -4.19459                     | T down vs N                            | 25.816  | 19.2547   | 11.9335    | 1         |
| cg20483694  | OR8J1                             | 1.57E-05          | 1.57E-05             | 0.283431           | -3.5282                      | T down vs N                            | 37.077  | 14.8883   | 6.42477    | 1         |
| cg20486569  | CLDN5;CLDN5;CLDN5                 | 0.00013947        | 0.000139468          | 12.3333            | 12.3333                      | T up vs N                              | 24.686  | 59.116    | 38.316     | 1         |
| cg20489026  | KCNJ9                             | 0.00173           | 0.00173              | 7.01623            | 7.01623                      | T up vs N                              | 14.099  | 35.5501   | 40.3439    | 1         |
| cg20491707  | PPYR1                             | 0.00160422        | 0.00160422           | 3.08098            | 3.08098                      | T up vs N                              | 14.369  | 11.8593   | 13.2057    | 1         |
| cg20497359  | ACTL6B                            | 1.83E-06          | 1.83E-06             | 0.124916           | -8.00535                     | T down vs N                            | 53.065  | 40.526    | 12.2194    | 1         |
| cg20503956  | CA13                              | 0.00140448        | 0.00140448           | 4.62803            | 4.62803                      | T up vs N                              | 14.851  | 21.9864   | 23.6881    | 1         |
| cg20504993  | TMEM40                            | 7.74E-06          | 7.74E-06             | 0.206086           | -4.85235                     | T down vs N                            | 41.856  | 23.3658   | 8.93191    | 1         |
| cg20508508  | LRRCS9                            | 4.94E-07          | 4.94E-07             | 0.315505           | -3.16952                     | T down vs N                            | 65.154  | 12.464    | 3.06083    | 1         |
| cg20508523  | POU2F2                            | 5.28E-05          | 5.28E-05             | 3.26964            | 3.26964                      | T up vs N                              | 29.766  | 13.1451   | 7.06575    | 1         |
| cg20512303  | PDLIM4;PDLIM4                     | 0.00170605        | 0.00170605           | 3.34204            | 3.34204                      | T up vs N                              | 14.149  | 13.6356   | 15.42      | 1         |
| cg20515400  | C6orf10                           | 3.91E-07          | 3.91E-07             | 0.269769           | -3.70688                     | T down vs N                            | 67.521  | 16.0779   | 3.80988    | 1         |
| cg20516460  | NCRNA00171                        | 5.72E-05          | 5.72E-05             | 0.260852           | -3.83359                     | T down vs N                            | 29.33   | 16.9134   | 9.22645    | 1         |
| cg20519373  | SAMD12;SAMD12                     | 0.00017658        | 0.000176575          | 0.272836           | -3.6652                      | T down vs N                            | 23.543  | 15.8017   | 10.7391    | 1         |
| cg20522483  | SEC24D                            | 3.88E-05          | 3.88E-05             | 0.319508           | -3.12981                     | T down vs N                            | 31.524  | 12.193    | 6.18853    | 1         |
| cg20523466  | MATN2;MATN2                       | 0.00085949        | 0.00085949           | 0.320325           | -3.12183                     | T down vs N                            | 16.704  | 12.1385   | 11.6266    | 1         |
| cg20523891  | LOC348840                         | 7.53E-07          | 7.53E-07             | 0.208748           | -4.79046                     | T down vs N                            | 61.039  | 22.9875   | 6.02562    | 1         |
| cg20524889  | KLF5                              | 0.00296961        | 0.00296961           | 3.5976             | 3.5976                       | T up vs N                              | 12.243  | 15.3519   | 20.0626    | 1         |
| cg20525486  | FOXP1                             | 1.74E-07          | 1.74E-07             | 0.118342           | -8.45006                     | T down vs N                            | 76.326  | 42.66     | 8.94274    | 1         |
| cg20528813  | VPS52                             | 0.00019262        | 0.000192618          | 0.29862            | -3.34874                     | T down vs N                            | 23.13   | 13.6809   | 9.4637     | 1         |
| cg20529645  | CRMP1;CRMP1                       | 0.00663846        | 0.00663846           | 0.289838           | -3.45021                     | T down vs N                            | 9.716   | 14.365    | 23.6559    | 1         |
| cg20530585  | WWTR1;WWTR1;WWTR1                 | 0.00030836        | 0.000308357          | 9.66012            | 9.66012                      | T up vs N                              | 20.974  | 48.1781   | 36.7524    | 1         |
| cg20530835  | MAD1L1;MAD1L1;MAD1L1              | 0.00345073        | 0.00345073           | 3.50794            | 3.50794                      | T up vs N                              | 11.751  | 14.7526   | 20.0876    | 1         |
| cg20531550  | KCP;KCP                           | 2.21E-05          | 2.21E-05             | 6.52871            | 6.52871                      | T up vs N                              | 34.901  | 32.9704   | 15.115     | 1         |
| cg20532999  | MIR548H4;NOX5                     | 0.003261          | 0.003261             | 4.48751            | 4.48751                      | T up vs N                              | 11.935  | 21.1104   | 28.3005    | 1         |
| cg20535723  | KIF20B                            | 1.65E-05          | 1.65E-05             | 0.229478           | -4.35772                     | T down vs N                            | 36.727  | 20.293    | 8.84061    | 1         |
| cg20538951  | TNRC18                            | 0.00096614        | 0.000966143          | 0.204805           | -4.8827                      | T down vs N                            | 16.252  | 23.5506   | 23.1853    | 1         |
| cg20539142  | CHRNA6                            | 1.96E-05          | 1.96E-05             | 0.138151           | -7.23843                     | T down vs N                            | 35.644  | 36.697    | 16.4728    | 1         |
| cg20539474  | BASE                              | 0.00038716        | 0.000387161          | 0.265398           | -3.76793                     | T down vs N                            | 19.977  | 16.4813   | 13.2002    | 1         |
|             | LOC100271832;LOC285045;LOC28504   |                   |                      |                    |                              |                                        |         |           |            |           |
| cg20541120  | 5                                 | 0.00452566        | 0.00452566           | 3.08045            | 3.08045                      | T up vs N                              | 10.886  | 11.8556   | 17.4258    | 1         |
| cg20541785  | LHFPL5                            | 0.00020153        | 0.000201526          | 0.300131           | -3.33188                     | T down vs N                            | 22.917  | 13.5669   | 9.47195    | 1         |
| cg20542190  | LILRA4                            | 7.31E-06          | 7.31E-06             | 0.202161           | -4.94656                     | T down vs N                            | 42.265  | 23.9382   | 9.0621     | 1         |
| cg20543426  | ERC2                              | 5.94E-05          | 5.94E-05             | 0.288439           | -3.46693                     | T down vs N                            | 29.119  | 14.4775   | 7.95496    | 1         |
| cg20547295  | NFU1;NFU1;NFU1;NFU1               | 2.52E-05          | 2.52E-05             | 3.48211            | 3.48211                      | T up vs N                              | 34.073  | 14.5794   | 6.8462     | 1         |
| cg20550790  | FLJ42709;FLJ42709;FLJ42709        | 0.00021716        | 0.000217164          | 3.81256            | 3.81256                      | T up vs N                              | 22.568  | 16.7752   | 11.8931    | 1         |
| cg20551517  | GIP                               | 2.25E-05          | 2.25E-05             | 0.127376           | -7.85075                     | T down vs N                            | 34.769  | 39.7698   | 18.301     | 1         |
| cg20556951  | SP6                               | 6.87E-07          | 6.87E-07             | 0.208549           | -4.79504                     | T down vs N                            | 61.918  | 23.0156   | 5.94734    | 1         |
| cg20557801  | LBXCOR1                           | 7.51E-05          | 7.51E-05             | 15.8162            | 15.8162                      | T up vs N                              | 27.853  | 71.4012   | 41.0162    | 1         |
| cg20559217  | DCPS                              | 3.92E-05          | 3.92E-05             | 0.224901           | -4.44641                     | T down vs N                            | 31.461  | 20.8524   | 10.6047    | 1         |
| cg20559612  | NXT1                              | 0.00119377        | 0.00119377           | 0.320159           | -3.12345                     | T down vs N                            | 15.451  | 12.1496   | 12.5812    | 1         |
| cg20560862  | NAP1L4                            | 0.00042136        | 0.000421356          | 4.06619            | 4.06619                      | T up vs N                              | 19.614  | 18.4287   | 15.0334    | 1         |
| cg20561863  | ABCA8                             | 0.00217856        | 0.00217856           | 0.259324           | -3.85619                     | T down vs N                            | 13.291  | 17.0617   | 20.5394    | 1         |
| cg20563666  | PLEKH2;LOC728819                  | 0.00020218        | 0.000202176          | 0.212126           | -4.71417                     | T down vs N                            | 22.902  | 22.5189   | 15.7323    | 1         |
| cg20566840  | GPR81                             | 1.02E-05          | 1.02E-05             | 0.304189           | -3.28743                     | T down vs N                            | 39.967  | 13.2658   | 5.31073    | 1         |
| cg20568840  | MYCBP;GJA9                        | 0.00162409        | 0.00162409           | 0.28252            | -3.04644                     | T down vs N                            | 14.325  | 11.6228   | 12.9823    | 1         |
| cg20569839  | TAF13                             | 1.27E-06          | 1.27E-06             | 0.324218           | -3.08434                     | T down vs N                            | 56.217  | 11.8823   | 3.38185    | 1         |
| cg20570016  | TMEM79;TMEM79                     | 0.00042271        | 0.000422709          | 3.57792            | 3.57792                      | T up vs N                              | 19.6    | 15.2207   | 12.425     | 1         |
| cg20571112  | TECTA                             | 0.00026376        | 0.000263756          | 0.249739           | -4.00418                     | T down vs N                            | 21.676  | 18.0271   | 13.3068    | 1         |
| cg20574490  | GRHL2                             | 5.99E-06          | 5.99E-06             | 7.46327            | 7.46327                      | T up vs N                              | 43.701  | 37.84     | 13.8541    | 1         |
| cg20576160  | ZDHHC2                            | 2.47E-06          | 2.47E-06             | 0.223691           | -4.47045                     | T down vs N                            | 50.545  | 21.0033   | 6.64867    | 1         |
| cg20577630  | CHRN3;CHRN3                       | 1.73E-05          | 1.73E-05             | 0.331207           | -3.01926                     | T down vs N                            | 36.424  | 11.4365   | 5.02381    | 1         |
| cg20578581  | ACOT6                             | 0.00010291        | 0.000102913          | 0.263811           | -3.79059                     | T down vs N                            | 26.21   | 16.6307   | 10.1523    | 1         |
| cg20583073  | S1PR4                             | 4.34E-07          | 4.34E-07             | 0.218562           | -4.57536                     | T down vs N                            | 66.454  | 21.6591   | 5.2148     | 1         |
| cg20584011  | ZDHHC11                           | 0.00033402        | 0.000334015          | 0.268419           | -3.72551                     | T down vs N                            | 20.621  | 16.2012   | 12.5709    | 1         |
| cg20585358  | ZAP70;ZAP70                       | 0.00011051        | 0.000110514          | 0.162457           | -6.15549                     | T down vs N                            | 25.847  | 30.934    | 19.1488    | 1         |
| cg20585676  | LOC100132215                      | 0.00029422        | 0.000294222          | 5.19157            | 5.19157                      | T up vs N                              | 21.183  | 25.4078   | 19.1908    | 1         |
| cg20587236  | KCTD10                            | 1.50E-05          | 1.50E-05             | 0.25321            | -3.94929                     | T down vs N                            | 37.378  | 17.6702   | 7.56385    | 1         |
| cg20588859  | LTBP3;LTBP3;LTBP3                 | 2.15E-06          | 2.15E-06             | 3.81958            | 3.81958                      | T up vs N                              | 51.717  | 16.8214   | 5.2041     | 1         |
| cg20590161  | FAAH2;FAAH2                       | 6.18E-05          | 6.18E-05             | 0.233266           | -4.28695                     | T down vs N                            | 28.904  | 19.8441   | 10.9849    | 1         |
| cg20592391  | AP3B2                             | 0.00181108        | 0.00181108           | 4.20472            | 4.20472                      | T up vs N                              | 13.936  | 19.3195   | 22.1803    | 1         |
| cg20592707  | TCHH                              | 3.21E-05          | 3.21E-05             | 0.159726           | -6.26072                     | T down vs N                            | 32.624  | 31.5138   | 15.4555    | 1         |
| cg20594982  | AGRN                              | 0.00039801        | 0.000398007          | 4.05626            | 4.05626                      | T up vs N                              | 19.858  | 18.3645   | 14.7967    | 1         |
| cg20596162  | DUOXA2                            | 0.00103914        | 0.00103914           | 3.80919            | 3.80919                      | T up vs N                              | 15.974  | 16.7531   | 16.7805    | 1         |
| cg20596724  | SDR9C7                            | 1.78E-05          | 1.78E-05             | 0.264047           | -3.78721                     | T down vs N                            | 36.252  | 16.6084   | 7.33012    | 1         |
| cg20597172  | SMYD3                             | 1.05E-05          | 1.05E-05             | 0.323036           | -3.09563                     | T down vs N                            | 39.739  | 11.9595   | 4.81522    | 1         |

| Probeset ID | UCSC_REFGENE_NAME              | p-value<br>(Type) | p-value (T vs.<br>N) | Ratio (T<br>vs. N) | Fold-<br>Change (T<br>vs. N) | Fold-Change (T vs.<br>N) (Description) | F(Type) | SS (Type) | SS (Error) | F (Error) |
|-------------|--------------------------------|-------------------|----------------------|--------------------|------------------------------|----------------------------------------|---------|-----------|------------|-----------|
| cg20597215  | OR4D6                          | 8.75E-07          | 8.75E-07             | 0.130922           | -7.63814                     | T down vs N                            | 59.625  | 38.717    | 10.3895    | 1         |
| cg20597409  | SLC25A21;SLC25A21;LOC100129794 | 1.07E-05          | 1.07E-05             | 0.19939            | -5.0153                      | T down vs N                            | 39.578  | 24.3533   | 9.84527    | 1         |
| cg20597477  | GPR176                         | 7.16E-05          | 7.16E-05             | 0.220338           | -4.53848                     | T down vs N                            | 28.109  | 21.4292   | 12.1976    | 1         |
| cg20597486  | IFI16;IFI16                    | 0.0064779         | 0.0064779            | 0.291534           | -3.43013                     | T down vs N                            | 9.7889  | 14.23     | 23.2589    | 1         |
| cg20597842  | APOBEC1                        | 8.94E-07          | 8.94E-07             | 0.209319           | -4.7774                      | T down vs N                            | 59.425  | 22.9075   | 6.16777    | 1         |
| cg20598894  | METTL13;METTL13;METTL13        | 0.00159613        | 0.00159613           | 0.272228           | -3.6734                      | T down vs N                            | 14.387  | 15.856    | 17.6339    | 1         |
| cg20599066  | GPNMB;GPNMB                    | 8.65E-06          | 8.65E-06             | 7.99676            | 7.99676                      | T up vs N                              | 41.073  | 40.4842   | 15.7706    | 1         |
| cg20600916  | GOT1L1                         | 2.04E-05          | 2.04E-05             | 0.198171           | -5.04614                     | T down vs N                            | 35.403  | 24.5388   | 11.09      | 1         |
| cg20608699  | TGM5;TGM5                      | 1.14E-05          | 1.14E-05             | 0.281355           | -3.55422                     | T down vs N                            | 39.157  | 15.0624   | 6.15467    | 1         |
| cg20608990  | CASP8;CASP8;CASP8;CASP8        | 6.96E-05          | 6.96E-05             | 0.258569           | -3.86744                     | T down vs N                            | 28.261  | 17.1355   | 9.70125    | 1         |
| cg20612962  | SPRR2B                         | 0.00015357        | 0.000153569          | 0.308978           | -3.23648                     | T down vs N                            | 24.215  | 12.9198   | 8.53679    | 1         |
| cg20613438  | SCARNA4;KIAA0907               | 0.00028071        | 0.000280714          | 0.296908           | -3.36805                     | T down vs N                            | 21.394  | 13.8114   | 10.3291    | 1         |
| cg20614157  | TNXB;TNXB;TNXA;STK19;STK19     | 0.00041588        | 0.000415882          | 0.315888           | -3.16568                     | T down vs N                            | 19.67   | 12.4378   | 10.1174    | 1         |
| cg20615517  | OR3A4                          | 0.00045978        | 0.000459776          | 0.166527           | -6.00502                     | T down vs N                            | 19.243  | 30.0972   | 25.0249    | 1         |
| cg20616414  | WNK2                           | 0.00626232        | 0.00626232           | 15.0972            | 15.0972                      | T up vs N                              | 9.8902  | 69.0152   | 111.651    | 1         |
| cg20617328  | HLA-DPA1                       | 0.00464829        | 0.00464829           | 0.324834           | -3.07849                     | T down vs N                            | 10.802  | 11.8423   | 17.5408    | 1         |
| cg20617637  | KRT28                          | 5.12E-07          | 5.12E-07             | 0.112258           | -8.90802                     | T down vs N                            | 64.792  | 44.7961   | 11.0622    | 1         |
| cg20618433  | SPC24                          | 0.00021634        | 0.000216343          | 0.306656           | -3.26098                     | T down vs N                            | 22.586  | 13.0863   | 9.27052    | 1         |
| cg20618695  | GS61;GS61                      | 0.00340515        | 0.00340515           | 0.295928           | -3.37921                     | T down vs N                            | 11.794  | 13.8867   | 18.3393    | 1         |
| cg20620783  | OR5E1P                         | 3.55E-05          | 3.55E-05             | 0.329773           | -3.03239                     | T down vs N                            | 32.028  | 11.5265   | 5.75823    | 1         |
| cg20623702  | OR4C6                          | 7.66E-06          | 7.66E-06             | 0.290105           | -3.44703                     | T down vs N                            | 41.93   | 14.3437   | 5.47343    | 1         |
| cg20623949  | C4orf44                        | 0.0002091         | 0.000209099          | 0.28927            | -3.45698                     | T down vs N                            | 22.744  | 14.4106   | 10.1374    | 1         |
| cg20624137  | TRIM10;TRIM10                  | 6.75E-05          | 6.75E-05             | 0.185498           | -5.39091                     | T down vs N                            | 28.428  | 26.5836   | 14.9617    | 1         |
| cg20625588  | MUC6                           | 1.02E-05          | 1.02E-05             | 0.078122           | -12.8004                     | T down vs N                            | 39.937  | 60.8786   | 24.3899    | 1         |
| cg20628994  | C10orf82                       | 0.00178602        | 0.00178602           | 5.35384            | 5.35384                      | T up vs N                              | 13.986  | 26.3663   | 30.1638    | 1         |
| cg20631997  | COL11A2;COL11A2;COL11A2        | 5.09E-06          | 5.09E-06             | 0.31604            | -3.16416                     | T down vs N                            | 44.908  | 12.4274   | 4.42771    | 1         |
| cg20632462  | NELL1;NELL1                    | 2.86E-06          | 2.86E-06             | 0.2895             | -3.45423                     | T down vs N                            | 49.384  | 14.3921   | 4.66296    | 1         |
| cg20632871  | MORN1                          | 1.21E-05          | 1.21E-05             | 0.287126           | -3.4828                      | T down vs N                            | 38.762  | 14.584    | 6.01996    | 1         |
| cg20632887  | ATP1A2;ATP1A2                  | 0.00053633        | 0.000536329          | 0.256227           | -3.90279                     | T down vs N                            | 18.599  | 17.3668   | 14.94      | 1         |
| cg20633317  | WNT11                          | 0.00012649        | 0.000126487          | 4.35094            | 4.35094                      | T up vs N                              | 25.169  | 20.2501   | 12.873     | 1         |
| cg20634798  | LCE3A                          | 1.88E-07          | 1.88E-07             | 0.217165           | -4.6048                      | T down vs N                            | 75.425  | 21.8422   | 4.6334     | 1         |
| cg20638016  | BSX                            | 0.00170779        | 0.00170779           | 0.179203           | -5.58026                     | T down vs N                            | 14.145  | 27.6842   | 31.3151    | 1         |
| cg20639805  | RBM20                          | 0.00032567        | 0.000325665          | 0.221105           | -4.52274                     | T down vs N                            | 20.732  | 21.3308   | 16.462     | 1         |
| cg20639948  | CHMP4C                         | 9.75E-05          | 9.75E-05             | 4.1695             | 4.1695                       | T up vs N                              | 26.485  | 19.0938   | 11.5348    | 1         |
| cg20640432  | CREB3L3                        | 0.00045414        | 0.000454142          | 0.227074           | -4.40384                     | T down vs N                            | 19.295  | 20.5844   | 17.0691    | 1         |
| cg20641280  | LAGE3                          | 0.0002087         | 0.000208695          | 4.90504            | 4.90504                      | T up vs N                              | 22.754  | 23.6865   | 16.6561    | 1         |
| cg20641465  | PITX3                          | 0.00029731        | 0.000297309          | 16.857             | 16.857                       | T up vs N                              | 21.137  | 74.7355   | 56.573     | 1         |
| cg20643029  | CLDN14;CLDN14                  | 0.0005321         | 0.0005321            | 4.58223            | 4.58223                      | T up vs N                              | 18.632  | 21.7019   | 18.6364    | 1         |
| cg20643675  | MIR1323                        | 9.11E-05          | 9.11E-05             | 0.242886           | -4.11716                     | T down vs N                            | 26.84   | 18.7575   | 11.1818    | 1         |
| cg20643945  | RIMBP2                         | 0.00496701        | 0.00496701           | 0.328815           | -3.04122                     | T down vs N                            | 10.819  | 10.9055   | 15.1195    | 1         |
| cg20646846  | HCCA2                          | 1.94E-05          | 1.94E-05             | 0.140148           | -7.13533                     | T down vs N                            | 35.696  | 36.167    | 16.211     | 1         |
| cg20647118  | GPC5                           | 0.00040438        | 0.000404375          | 4.28032            | 4.28032                      | T up vs N                              | 19.79   | 19.8019   | 16.0098    | 1         |
| cg20648847  | ACTN3                          | 0.002421          | 0.002421             | 0.138743           | -7.20757                     | T down vs N                            | 12.929  | 36.5388   | 45.217     | 1         |
| cg20648899  | EPHA7                          | 0.0052333         | 0.0052333            | 0.269186           | -3.7149                      | T down vs N                            | 10.435  | 16.131    | 24.7338    | 1         |
| cg20649285  | CXorf48;CXorf48                | 0.00072512        | 0.000725123          | 0.24773            | -4.03666                     | T down vs N                            | 17.374  | 18.2377   | 16.7952    | 1         |
| cg20649298  | C20orf56                       | 1.94E-05          | 1.94E-05             | 0.224316           | -4.458                       | T down vs N                            | 35.707  | 20.9252   | 9.37647    | 1         |
| cg20649663  | HECW2                          | 0.00023945        | 0.000239446          | 0.318491           | -3.13981                     | T down vs N                            | 22.117  | 12.2613   | 8.87021    | 1         |
| cg20654082  | STAT4                          | 1.02E-06          | 1.02E-06             | 0.268089           | -3.73011                     | T down vs N                            | 58.222  | 16.2316   | 4.46059    | 1         |
| cg20655644  | RASGRF1;RASGRF1;RASGRF1        | 0.00010409        | 0.000104088          | 0.251887           | -3.97003                     | T down vs N                            | 26.152  | 17.8052   | 10.8935    | 1         |
| cg20655792  | CD97;CD97;CD97                 | 0.00339484        | 0.00339484           | 3.17435            | 3.17435                      | T up vs N                              | 11.804  | 12.4969   | 16.9396    | 1         |
| cg20659057  | BAIAP2;BAIAP2;BAIAP2;BAIAP2    | 0.00215524        | 0.00215524           | 3.5295             | 3.5295                       | T up vs N                              | 13.328  | 14.897    | 17.8835    | 1         |
| cg20663831  | GIMAP2                         | 3.93E-06          | 3.93E-06             | 0.259318           | -3.85627                     | T down vs N                            | 46.861  | 17.0622   | 5.82566    | 1         |
| cg20666379  | PTS                            | 2.72E-05          | 2.72E-05             | 0.302766           | -3.30288                     | T down vs N                            | 33.623  | 13.3705   | 6.36258    | 1         |
| cg20667124  | NCLN                           | 3.85E-06          | 3.85E-06             | 0.177501           | -5.63377                     | T down vs N                            | 47.024  | 27.9924   | 9.52455    | 1         |
| cg20667684  | PRAME;LOC648691;PRAME;PRAME;P  | 0.00013689        | 0.000136892          | 0.275843           | -3.62525                     | T down vs N                            | 24.778  | 15.5361   | 10.0324    | 1         |
| cg20668096  | RAME;PRAME                     | 0.00223421        | 0.00223421           | 0.218283           | -4.58121                     | T down vs N                            | 13.204  | 21.6955   | 26.2897    | 1         |
| cg20671415  | SPRR3;SPRR3                    | 4.72E-06          | 4.72E-06             | 0.14122            | -7.08117                     | T down vs N                            | 45.474  | 35.8871   | 12.6269    | 1         |
| cg20671534  | PTPRN                          | 5.03E-05          | 5.03E-05             | 0.307937           | -3.24742                     | T down vs N                            | 30.039  | 12.9942   | 6.92115    | 1         |
| cg20672708  | TM9SF4                         | 4.58E-07          | 4.58E-07             | 0.172242           | -5.80579                     | T down vs N                            | 65.917  | 28.9749   | 7.03308    | 1         |
| cg20673840  | ESM1;ESM1;ESM1;ESM1            | 0.00017493        | 0.00017493           | 0.200837           | -4.97916                     | T down vs N                            | 23.587  | 24.1353   | 16.3717    | 1         |
| cg20674212  | LOC340357                      | 0.00042549        | 0.000425486          | 0.304189           | -3.28743                     | T down vs N                            | 19.572  | 13.2658   | 10.8447    | 1         |
| cg20674248  | FCRL2                          | 3.23E-08          | 3.23E-08             | 0.131081           | -7.62888                     | T down vs N                            | 97.676  | 38.6709   | 6.33456    | 1         |
| cg20676475  | LCE3D                          | 9.90E-06          | 9.90E-06             | 0.179999           | -5.5556                      | T down vs N                            | 40.136  | 27.5418   | 10.9793    | 1         |
| cg20676696  | GSTM2;GSTM2                    | 2.96E-05          | 2.96E-05             | 0.309239           | -3.23374                     | T down vs N                            | 33.1    | 12.9012   | 6.23627    | 1         |
| cg20678233  | C7orf52                        | 0.0001588         | 0.000158797          | 6.49421            | 6.49421                      | T up vs N                              | 24.053  | 32.7845   | 21.8085    | 1         |
| cg20678835  | HTR1D                          | 2.12E-05          | 2.12E-05             | 0.293585           | -3.40617                     | T down vs N                            | 35.159  | 14.0686   | 6.40228    | 1         |
| cg20681653  | ATAD3A;ATAD3A;ATAD3A           | 0.00499743        | 0.00499743           | 0.310853           | -3.21696                     | T down vs N                            | 10.577  | 12.7871   | 19.3431    | 1         |
| cg20688651  | HMG2A2;RPSAP52;HMG2A2          | 0.00012696        | 0.00012696           | 0.326028           | -3.06722                     | T down vs N                            | 25.151  | 11.7651   | 7.48458    | 1         |
| cg20688928  | BTF3L1                         | 0.00027843        | 0.000278433          | 0.327306           | -3.05524                     | T down vs N                            | 21.431  | 11.6831   | 8.72245    | 1         |
| cg20689135  | F7;F7                          | 0.00275948        | 0.00275948           | 3.05167            | 3.05167                      | T up vs N                              | 12.488  | 11.6586   | 14.9379    | 1         |

| Probeset ID                                                                                                              | UCSC_REFGENE_NAME           | p-value<br>(Type) | p-value (T vs.<br>N) | Ratio (T<br>vs. N) | Fold-<br>Change (T<br>vs. N) | Fold-Change (T vs.<br>N) (Description) | F(Type) | SS (Type) | SS (Error) | F (Error) |
|--------------------------------------------------------------------------------------------------------------------------|-----------------------------|-------------------|----------------------|--------------------|------------------------------|----------------------------------------|---------|-----------|------------|-----------|
| cg20690420                                                                                                               | NR2E1                       | 0.00015239        | 0.000152391          | 0.268849           | -3.71955                     | T down vs N                            | 24.252  | 16.1618   | 10.6625    | 1         |
| cg20693190                                                                                                               | ZSCAN5A                     | 5.72E-07          | 5.72E-07             | 0.230897           | -4.33094                     | T down vs N                            | 63.687  | 20.1234   | 5.0556     | 1         |
| cg20694572                                                                                                               | FLG2                        | 0.00232605        | 0.00232605           | 0.268763           | -3.72075                     | T down vs N                            | 13.066  | 16.1697   | 19.8011    | 1         |
| cg20695297                                                                                                               | S1PR4                       | 1.53E-06          | 1.53E-06             | 0.126143           | -7.92752                     | T down vs N                            | 54.602  | 40.1463   | 11.7641    | 1         |
| cg20695587                                                                                                               | TMPRSS11F                   | 0.00015486        | 0.000154859          | 0.235922           | -4.23869                     | T down vs N                            | 24.174  | 19.5366   | 12.9305    | 1         |
| cg20702913                                                                                                               | KLF11                       | 0.0068726         | 0.0068726            | 4.69407            | 4.69407                      | T up vs N                              | 9.6131  | 22.3949   | 37.2738    | 1         |
| cg20704530                                                                                                               | C1orf168                    | 9.36E-05          | 9.36E-05             | 0.332956           | -3.0034                      | T down vs N                            | 26.7    | 11.3278   | 6.7883     | 1         |
| cg20704555                                                                                                               | JAZF1                       | 0.00028611        | 0.000286108          | 0.332746           | -3.00529                     | T down vs N                            | 21.309  | 11.3408   | 8.51545    | 1         |
| cg20704654                                                                                                               | NCRNA00028;REM1             | 0.00489428        | 0.00489428           | 4.04359            | 4.04359                      | T up vs N                              | 10.642  | 18.2825   | 27.4884    | 1         |
| cg20705908                                                                                                               | C13orf27                    | 0.00359385        | 0.00359385           | 0.322139           | -3.10425                     | T down vs N                            | 11.619  | 12.0184   | 16.55      | 1         |
| cg20708856                                                                                                               | ATP11A;ATP11A               | 5.67E-05          | 5.67E-05             | 0.297428           | -3.36216                     | T down vs N                            | 29.372  | 13.7716   | 7.50195    | 1         |
| cg20709280                                                                                                               | ORS2B2                      | 5.77E-05          | 5.77E-05             | 0.250931           | -3.98515                     | T down vs N                            | 29.282  | 17.9036   | 9.78281    | 1         |
| cg20710635                                                                                                               | SNX3;SNX3                   | 0.00012573        | 0.000125729          | 0.225372           | -4.4371                      | T down vs N                            | 25.199  | 20.7938   | 13.2029    | 1         |
| cg20712263                                                                                                               | GPR133;GPR133               | 0.00549339        | 0.00549339           | 0.307206           | -3.25515                     | T down vs N                            | 10.286  | 13.0467   | 20.2934    | 1         |
| cg20713492                                                                                                               | AQP10                       | 6.97E-06          | 6.97E-06             | 0.309623           | -3.22974                     | T down vs N                            | 42.608  | 12.874    | 4.83444    | 1         |
| cg20714328                                                                                                               | THBS4                       | 0.00121669        | 0.00121669           | 0.173479           | -5.7644                      | T down vs N                            | 15.38   | 28.7397   | 29.8977    | 1         |
| cg20714708                                                                                                               | LRRK1                       | 0.00455846        | 0.00455846           | 0.201054           | -4.97379                     | T down vs N                            | 10.863  | 24.1029   | 35.5009    | 1         |
| cg20717075                                                                                                               | GPC6                        | 0.00026334        | 0.000263344          | 0.311477           | -3.21051                     | T down vs N                            | 21.683  | 12.7432   | 9.40343    | 1         |
| cg20719439                                                                                                               | FHL5;FHL5                   | 0.00018906        | 0.000189056          | 0.21857            | -4.57519                     | T down vs N                            | 23.218  | 21.6581   | 14.9249    | 1         |
| cg20721738                                                                                                               | RAB36                       | 1.41E-05          | 1.41E-05             | 0.250789           | -3.98742                     | T down vs N                            | 37.785  | 17.9183   | 7.58742    | 1         |
| cg20723425                                                                                                               | DNAH17                      | 3.03E-06          | 3.03E-06             | 0.162081           | -6.16977                     | T down vs N                            | 48.9    | 31.0129   | 10.1473    | 1         |
| cg20724579                                                                                                               | ZNF415;ZNF415;ZNF415;ZNF415 | 4.98E-05          | 4.98E-05             | 0.260443           | -3.83961                     | T down vs N                            | 30.1    | 16.9529   | 9.01159    | 1         |
| cg20726575                                                                                                               | SLMO2                       | 0.00010799        | 0.000107985          | 0.207962           | -4.80858                     | T down vs N                            | 25.965  | 23.0985   | 14.2338    | 1         |
| NCRNA00081;NCRNA00081;NCRNA00081;NCRNA00081;NCRNA00081;NCRNA00081;NCRNA00081;NCRNA00081;NCRNA00081;NCRNA00081;NCRNA00081 |                             |                   |                      |                    |                              |                                        |         |           |            |           |
| cg20728791                                                                                                               | 081;NCRNA00081;NCRNA00081   | 0.00022383        | 0.000223826          | 0.280566           | -3.56422                     | T down vs N                            | 22.428  | 15.1292   | 10.7931    | 1         |
| cg20731469                                                                                                               | NR2E1                       | 3.64E-06          | 3.64E-06             | 0.119976           | -8.335                       | T down vs N                            | 47.456  | 42.1137   | 14.1987    | 1         |
| cg20731529                                                                                                               | SATB2                       | 6.98E-05          | 6.98E-05             | 0.240338           | -4.16081                     | T down vs N                            | 28.247  | 19.0381   | 10.7839    | 1         |
| cg20734569                                                                                                               | SPINK8                      | 8.09E-05          | 8.09E-05             | 0.170229           | -5.87444                     | T down vs N                            | 27.46   | 29.3635   | 17.1092    | 1         |
| cg20736321                                                                                                               | MUC6                        | 1.37E-06          | 1.37E-06             | 0.119891           | -8.34092                     | T down vs N                            | 55.557  | 42.1419   | 12.1365    | 1         |
| cg20738274                                                                                                               | C1orf116;C1orf116           | 3.22E-07          | 3.22E-07             | 0.284837           | -3.51078                     | T down vs N                            | 69.556  | 14.7717   | 3.39792    | 1         |
| cg20739013                                                                                                               | EOMES                       | 2.68E-06          | 2.68E-06             | 0.234559           | -4.26332                     | T down vs N                            | 49.881  | 19.6937   | 6.317      | 1         |
| cg20739526                                                                                                               | DPP6;DPP6;DPP6              | 9.05E-05          | 9.05E-05             | 3.94512            | 3.94512                      | T up vs N                              | 26.873  | 17.643    | 10.5047    | 1         |
| cg20739919                                                                                                               | BEND7                       | 0.00028636        | 0.000286361          | 0.318979           | -3.135                       | T down vs N                            | 21.305  | 12.2285   | 9.18368    | 1         |
| cg20741319                                                                                                               | WNT5A                       | 0.0001473         | 0.000147299          | 0.158585           | -6.30578                     | T down vs N                            | 24.418  | 31.7607   | 20.8113    | 1         |
| cg20742562                                                                                                               | NDUFS6;MRPL36               | 0.00501484        | 0.00501484           | 5.31374            | 5.31374                      | T up vs N                              | 10.566  | 26.1306   | 39.5682    | 1         |
| cg20746634                                                                                                               | FLT4;FLT4                   | 0.00086963        | 0.00086963           | 0.308958           | -3.23669                     | T down vs N                            | 16.659  | 12.9213   | 12.4103    | 1         |
| cg20747630                                                                                                               | MAGEL2                      | 0.00064878        | 0.000648776          | 0.292131           | -3.42313                     | T down vs N                            | 17.821  | 14.1828   | 12.734     | 1         |
| cg20748397                                                                                                               | MYO15A                      | 0.00034743        | 0.000347433          | 0.333228           | -3.00095                     | T down vs N                            | 20.448  | 11.311    | 8.85062    | 1         |
| cg20748791                                                                                                               | DTNBP1;DTNBP1;DTNBP1        | 8.89E-05          | 8.89E-05             | 0.314713           | -3.17749                     | T down vs N                            | 26.966  | 12.5183   | 7.42759    | 1         |
| cg20756702                                                                                                               | AQP12B                      | 1.13E-05          | 1.13E-05             | 0.300119           | -3.33201                     | T down vs N                            | 39.248  | 13.5678   | 5.53107    | 1         |
| cg20757966                                                                                                               | HCG26                       | 0.00125905        | 0.00125905           | 0.274056           | -3.64889                     | T down vs N                            | 15.253  | 15.6933   | 16.4618    | 1         |
| cg20758492                                                                                                               | RPTOR;RPTOR                 | 0.00012304        | 0.000123042          | 0.299576           | -3.33805                     | T down vs N                            | 25.307  | 13.6086   | 8.6039     | 1         |
| cg20758982                                                                                                               | C6orf150                    | 0.0001265         | 0.000126497          | 0.24044            | -4.15905                     | T down vs N                            | 25.169  | 19.0268   | 12.0955    | 1         |
| cg20760057                                                                                                               | ARHGAP18                    | 4.82E-05          | 4.82E-05             | 0.210584           | -4.74869                     | T down vs N                            | 30.279  | 22.7312   | 12.0117    | 1         |
| cg20760360                                                                                                               | PIP4K2B                     | 0.00023693        | 0.000236933          | 0.331154           | -3.01975                     | T down vs N                            | 22.165  | 11.4399   | 8.25788    | 1         |
| MS4A7;MS4A7;MS4A7;MS4A7;MS4A7;MS4A7;MS4A7;MS4A7;MS4A7;MS4A7;MS4A7                                                        |                             |                   |                      |                    |                              |                                        |         |           |            |           |
| cg20761290                                                                                                               | ;MS4A7;MS4A7;MS4A7          | 1.29E-06          | 1.29E-06             | 0.154727           | -6.46298                     | T down vs N                            | 56.067  | 32.6157   | 9.30762    | 1         |
| cg20762729                                                                                                               | C21orf7                     | 9.48E-06          | 9.48E-06             | 0.269036           | -3.71698                     | T down vs N                            | 40.439  | 16.1448   | 6.38779    | 1         |
| cg20765408                                                                                                               | PARP4                       | 0.0013309         | 0.0013309            | 0.277496           | -3.60366                     | T down vs N                            | 15.048  | 15.3923   | 16.3661    | 1         |
| cg20768358                                                                                                               | TP73                        | 2.26E-05          | 2.26E-05             | 0.242057           | -4.13126                     | T down vs N                            | 34.761  | 18.8482   | 8.67566    | 1         |
| cg20768399                                                                                                               | SNIP1                       | 2.62E-05          | 2.62E-05             | 0.234915           | -4.25686                     | T down vs N                            | 33.835  | 19.6525   | 9.29326    | 1         |
| cg20768638                                                                                                               | TRANK1                      | 7.58E-05          | 7.58E-05             | 0.17506            | -5.71234                     | T down vs N                            | 27.803  | 28.4427   | 16.368     | 1         |
| cg20770989                                                                                                               | OR8K1                       | 2.79E-06          | 2.79E-06             | 0.168129           | -5.94781                     | T down vs N                            | 49.569  | 29.7766   | 9.61132    | 1         |
| cg20771595                                                                                                               | SEMA3C                      | 0.00118947        | 0.00118947           | 0.30562            | -3.27204                     | T down vs N                            | 15.465  | 13.1614   | 13.617     | 1         |
| cg20773521                                                                                                               | FAM69A                      | 1.87E-05          | 1.87E-05             | 0.212423           | -4.70758                     | T down vs N                            | 35.936  | 22.4783   | 10.0082    | 1         |
| cg20773915                                                                                                               | CHD5                        | 5.00E-05          | 5.00E-05             | 0.221215           | -4.52049                     | T down vs N                            | 30.075  | 21.3168   | 11.3407    | 1         |
| cg20774166                                                                                                               | C6orf47                     | 9.06E-06          | 9.06E-06             | 0.256427           | -3.89975                     | T down vs N                            | 40.751  | 17.3469   | 6.81091    | 1         |
| P2RX2;P2RX2;P2RX2;P2RX2;P2RX2;P2RX2;P2RX2;P2RX2;P2RX2;P2RX2;P2RX2                                                        |                             |                   |                      |                    |                              |                                        |         |           |            |           |
| cg20776947                                                                                                               | RX2                         | 1.37E-05          | 1.37E-05             | 0.232748           | -4.29649                     | T down vs N                            | 37.943  | 19.9047   | 8.39358    | 1         |
| cg20778958                                                                                                               | OR6P1                       | 1.61E-05          | 1.61E-05             | 0.136335           | -7.3349                      | T down vs N                            | 36.893  | 37.1895   | 16.1285    | 1         |
| cg20782117                                                                                                               | SLC25A13;SLC25A13;SLC25A13  | 1.01E-06          | 1.01E-06             | 0.237737           | -4.20632                     | T down vs N                            | 58.286  | 19.3298   | 5.30617    | 1         |
| BLCAP;BLCAP;BLCAP;BLCAP;NNAT;NNAT;NNAT;NNAT;NNAT;NNAT;NNAT                                                               |                             |                   |                      |                    |                              |                                        |         |           |            |           |
| cg20783699                                                                                                               | AT;BLCAP                    | 0.00084113        | 0.000841132          | 3.39658            | 3.39658                      | T up vs N                              | 16.789  | 14.0039   | 13.3461    | 1         |
| cg20784188                                                                                                               | DUSP21;DUSP21               | 0.00082527        | 0.000825273          | 0.206335           | -4.84649                     | T down vs N                            | 16.863  | 23.3301   | 22.1359    | 1         |
| cg20784693                                                                                                               | HDAC4                       | 6.57E-05          | 6.57E-05             | 0.183471           | -5.45045                     | T down vs N                            | 28.569  | 26.9314   | 15.083     | 1         |
| cg20785459                                                                                                               | HBBP1                       | 0.0035884         | 0.0035884            | 0.254308           | -3.93225                     | T down vs N                            | 11.624  | 17.5591   | 24.1697    | 1         |
| cg20785674                                                                                                               | PLEKHO1                     | 0.00219371        | 0.00219371           | 0.193448           | -5.16936                     | T down vs N                            | 13.267  | 25.2757   | 30.4825    | 1         |
| cg20786131                                                                                                               | CABLES1;CABLES1             | 0.00039029        | 0.000390285          | 0.273157           | -3.6609                      | T down vs N                            | 19.942  | 15.7731   | 12.6549    | 1         |
| cg20786513                                                                                                               | MIR548H3                    | 2.52E-06          | 2.52E-06             | 0.305963           | -3.26837                     | T down vs N                            | 50.403  | 13.1365   | 4.17009    | 1         |
| cg20789620                                                                                                               | FSD1                        | 0.00048771        | 0.000487706          | 0.303411           | -3.29586                     | T down vs N                            | 18.995  | 13.3229   | 11.2223    | 1         |
| cg20792376                                                                                                               | EMX2OS                      | 0.00011182        | 0.000111816          | 0.16253            | -6.1527                      | T down vs N                            | 25.788  | 30.9186   | 19.1833    | 1         |

| Probeset ID | UCSC_REFGENE_NAME                                                    | p-value<br>(Type) | p-value (T vs.<br>N) | Ratio (T<br>vs. N) | Fold-<br>Change (T<br>vs. N) | Fold-Change (T vs.<br>N) (Description) | F(Type) | SS (Type) | SS (Error) | F (Error) |
|-------------|----------------------------------------------------------------------|-------------------|----------------------|--------------------|------------------------------|----------------------------------------|---------|-----------|------------|-----------|
| cg20792408  | TTL8                                                                 | 0.00014942        | 0.000149415          | 0.264972           | -3.77399                     | T down vs N                            | 24.348  | 16.5213   | 10.8566    | 1         |
| cg20793071  | C1orf83;TMEM59                                                       | 8.31E-07          | 8.31E-07             | 0.101833           | -9.81997                     | T down vs N                            | 60.109  | 48.8779   | 13.0104    | 1         |
| cg20794828  | LY6G6C                                                               | 1.00E-09          | 1.00E-09             | 0.307677           | -3.25016                     | T down vs N                            | 159.02  | 13.0128   | 1.30934    | 1         |
| cg20798249  | MLNR                                                                 | 1.18E-05          | 1.18E-05             | 3.33784            | 3.33784                      | T up vs N                              | 38.919  | 13.6072   | 5.59404    | 1         |
| cg20801056  | MBP;MBP;MBP;MBP<br>TGIF1;TGIF1;TGIF1;TGIF1;TGIF1;TGIF1;              | 3.34E-05          | 3.34E-05             | 45.8188            | 45.8188                      | T up vs N                              | 32.4    | 137.011   | 67.6594    | 1         |
| cg20801464  | TGIF1;TGIF1                                                          | 5.29E-05          | 5.29E-05             | 0.276303           | -3.61922                     | T down vs N                            | 29.756  | 15.4959   | 8.33235    | 1         |
| cg20802509  | URB2                                                                 | 0.00338786        | 0.00338786           | 0.291926           | -3.42553                     | T down vs N                            | 11.81   | 14.199    | 19.2359    | 1         |
| cg20803293  | GSTM5                                                                | 8.68E-05          | 8.68E-05             | 8.09794            | 8.09794                      | T up vs N                              | 27.09   | 40.9754   | 24.2007    | 1         |
| cg20804831  | NUDT16P;NUDT16P                                                      | 8.43E-05          | 8.43E-05             | 4.20986            | 4.20986                      | T up vs N                              | 27.245  | 19.3524   | 11.3651    | 1         |
| cg20806172  | NPHP4                                                                | 6.92E-05          | 6.92E-05             | 0.298653           | -3.34836                     | T down vs N                            | 28.291  | 13.6784   | 7.73581    | 1         |
| cg20806676  | GABBR1;GABBR1;GABBR1                                                 | 7.78E-05          | 7.78E-05             | 0.181344           | -5.51437                     | T down vs N                            | 27.664  | 27.303    | 15.7913    | 1         |
| cg20807417  | HGC6.3                                                               | 8.18E-06          | 8.18E-06             | 0.323391           | -3.09223                     | T down vs N                            | 41.469  | 11.9362   | 4.60536    | 1         |
| cg20807545  | ADAMTS18                                                             | 0.00019638        | 0.000196384          | 3.74752            | 3.74752                      | T up vs N                              | 23.039  | 16.3467   | 11.3525    | 1         |
| cg20807790  | POMC;POMC                                                            | 0.00087865        | 0.000878645          | 0.329458           | -3.03529                     | T down vs N                            | 16.619  | 11.5464   | 11.1166    | 1         |
| cg20809881  | XKR8                                                                 | 0.00078455        | 0.000784552          | 4.35424            | 4.35424                      | T up vs N                              | 17.062  | 20.271    | 19.0093    | 1         |
| cg20810222  | SH3RF3                                                               | 0.00036053        | 0.000360526          | 0.330516           | -3.02557                     | T down vs N                            | 20.286  | 11.4798   | 9.05428    | 1         |
| cg20810997  | DEFB119;DEFB119;DEFB119;DEFB119;                                     | 3.51E-06          | 3.51E-06             | 0.296776           | -3.36955                     | T down vs N                            | 47.752  | 13.8215   | 4.63111    | 1         |
| cg20812354  | ORM2                                                                 | 3.02E-05          | 3.02E-05             | 0.197477           | -5.06389                     | T down vs N                            | 32.996  | 24.6454   | 11.9507    | 1         |
| cg20812772  | DLGAP2                                                               | 0.00169998        | 0.00169998           | 0.2321             | -4.30848                     | T down vs N                            | 14.161  | 19.9809   | 22.5754    | 1         |
| cg20814095  | CHRNE;C17orf107;C17orf107                                            | 0.00648315        | 0.00648315           | 5.0862             | 5.0862                       | T up vs N                              | 9.7865  | 24.7791   | 40.5114    | 1         |
| cg20814503  | OR52B4                                                               | 2.96E-06          | 2.96E-06             | 0.149284           | -6.69865                     | T down vs N                            | 49.095  | 33.8797   | 11.0414    | 1         |
| cg20815571  | SPATA21                                                              | 3.42E-05          | 3.42E-05             | 0.21511            | -4.64877                     | T down vs N                            | 32.246  | 22.1149   | 10.9732    | 1         |
| cg20815643  | MUC12                                                                | 1.11E-05          | 1.11E-05             | 0.222775           | -4.48883                     | T down vs N                            | 39.344  | 21.1186   | 8.58822    | 1         |
| cg20817661  | F13A1                                                                | 2.74E-07          | 2.74E-07             | 0.211759           | -4.72235                     | T down vs N                            | 71.289  | 22.5692   | 5.06541    | 1         |
| cg20817902  | PRDM8;PRDM8                                                          | 1.19E-05          | 1.19E-05             | 35.3989            | 35.3989                      | T up vs N                              | 38.888  | 119.149   | 49.0227    | 1         |
| cg20818407  | DAXX;DAXX;DAXX;DAXX                                                  | 7.79E-06          | 7.79E-06             | 0.176207           | -5.67516                     | T down vs N                            | 41.808  | 28.2299   | 10.8038    | 1         |
| cg20818806  | COL4A1                                                               | 0.00349208        | 0.00349208           | 0.251048           | -3.98331                     | T down vs N                            | 11.712  | 17.8916   | 24.4421    | 1         |
| cg20819617  | PTK7;PTK7;PTK7;PTK7                                                  | 0.00112561        | 0.00112561           | 0.310602           | -3.21955                     | T down vs N                            | 15.672  | 12.8047   | 13.0731    | 1         |
| cg20820107  | TNFRSF8;TNFRSF8                                                      | 9.73E-05          | 9.73E-05             | 0.285506           | -3.50256                     | T down vs N                            | 26.497  | 14.7165   | 8.88645    | 1         |
| cg20822579  | RIPK3;RIPK3                                                          | 0.00031314        | 0.000313144          | 3.34538            | 3.34538                      | T up vs N                              | 20.906  | 13.6582   | 10.4531    | 1         |
| cg20823091  | LCE4A                                                                | 0.00052263        | 0.00052263           | 0.231876           | -4.31265                     | T down vs N                            | 18.706  | 20.0074   | 17.1129    | 1         |
| cg20824294  | PLS1                                                                 | 5.23E-05          | 5.23E-05             | 0.201342           | -4.96666                     | T down vs N                            | 29.826  | 24.0598   | 12.9067    | 1         |
| cg20824977  | BNIP2                                                                | 0.0051247         | 0.0051247            | 0.295659           | -3.38227                     | T down vs N                            | 10.499  | 13.9074   | 21.1933    | 1         |
| cg20825532  | FLG2                                                                 | 7.24E-05          | 7.24E-05             | 0.148508           | -6.73366                     | T down vs N                            | 28.049  | 34.0657   | 19.4322    | 1         |
| cg20826224  | EBF4                                                                 | 0.00011511        | 0.000115111          | 8.31424            | 8.31424                      | T up vs N                              | 25.641  | 42.0147   | 26.2169    | 1         |
| cg20827128  | PHACTR1                                                              | 6.35E-06          | 6.35E-06             | 0.224995           | -4.44454                     | T down vs N                            | 43.282  | 20.8406   | 7.70411    | 1         |
| cg20837463  | VWF                                                                  | 2.86E-05          | 2.86E-05             | 4.89549            | 4.89549                      | T up vs N                              | 33.317  | 23.6284   | 11.3472    | 1         |
| cg20839149  | SH2D2A;NTRK1;SH2D2A;SH2D2A;SH2D2A;SH2D2A;SH2D2A;SH2D2A;SH2D2A;SH2D2A | 2.39E-06          | 2.39E-06             | 0.256132           | -3.90423                     | T down vs N                            | 50.833  | 17.3762   | 5.46933    | 1         |
| cg20840426  | NOS1                                                                 | 2.89E-05          | 2.89E-05             | 0.296296           | -3.37501                     | T down vs N                            | 33.247  | 13.8584   | 6.66925    | 1         |
| cg20841047  | LOC200726                                                            | 2.48E-05          | 2.48E-05             | 3.72558            | 3.72558                      | T up vs N                              | 34.177  | 16.2017   | 7.5848     | 1         |
| cg20841748  | CNTNAP1                                                              | 5.25E-06          | 5.25E-06             | 5.32774            | 5.32774                      | T up vs N                              | 44.678  | 26.2129   | 9.3873     | 1         |
| cg20849025  | MPEG1                                                                | 2.56E-05          | 2.56E-05             | 0.151666           | -6.59343                     | T down vs N                            | 33.989  | 33.318    | 15.6842    | 1         |
| cg20849032  | DAXX;DAXX;DAXX;DAXX                                                  | 0.00101772        | 0.00101772           | 0.208326           | -4.80017                     | T down vs N                            | 16.053  | 23.047    | 22.9707    | 1         |
| cg20849855  | ADPRHL1;ADPRHL1                                                      | 0.00063213        | 0.000632128          | 0.284744           | -3.51192                     | T down vs N                            | 17.926  | 14.7793   | 13.1916    | 1         |
| cg20852226  | MYO7A;MYO7A;MYO7A                                                    | 1.50E-05          | 1.50E-05             | 5.18437            | 5.18437                      | T up vs N                              | 37.352  | 25.365    | 10.8652    | 1         |
| cg20852945  | TSPAN18                                                              | 2.10E-05          | 2.10E-05             | 0.241975           | -4.13265                     | T down vs N                            | 35.216  | 18.8572   | 8.56745    | 1         |
| cg20857709  | HAAO;HAAO                                                            | 0.00620323        | 0.00620323           | 5.45498            | 5.45498                      | T up vs N                              | 9.9186  | 26.9578   | 43.4864    | 1         |
| cg20860112  | HSP90AB2P                                                            | 0.00055322        | 0.000553218          | 0.275066           | -3.63549                     | T down vs N                            | 18.471  | 15.6042   | 13.5168    | 1         |
| cg20862097  | DAAM2                                                                | 0.00530928        | 0.00530928           | 3.30237            | 3.30237                      | T up vs N                              | 10.391  | 13.367    | 20.5831    | 1         |
| cg20863162  | GPX5;GPX5                                                            | 0.00076882        | 0.000768819          | 0.208685           | -4.79191                     | T down vs N                            | 17.142  | 22.9964   | 21.4644    | 1         |
| cg20863321  | HDLBP                                                                | 0.00077409        | 0.000774089          | 0.226593           | -4.4132                      | T down vs N                            | 17.115  | 20.6434   | 19.2985    | 1         |
| cg20868668  | SLC35A3                                                              | 0.00098845        | 0.000988451          | 0.322186           | -3.1038                      | T down vs N                            | 16.165  | 12.0153   | 11.893     | 1         |
| cg20869257  | PKP1;PKP1                                                            | 0.00053009        | 0.000530092          | 3.47992            | 3.47992                      | T up vs N                              | 18.648  | 14.5647   | 12.4969    | 1         |
| cg20871097  | CD300LD;C17orf77                                                     | 0.00012395        | 0.000123947          | 0.199932           | -5.00169                     | T down vs N                            | 25.27   | 24.2713   | 15.3675    | 1         |
| cg20872630  | ESPNL                                                                | 0.00025214        | 0.000252142          | 0.303691           | -3.29282                     | T down vs N                            | 21.88   | 13.3023   | 9.7273     | 1         |
| cg20874052  | C11orf60;C11orf60                                                    | 1.18E-05          | 1.18E-05             | 0.189979           | -5.26373                     | T down vs N                            | 38.952  | 25.8355   | 10.6122    | 1         |
| cg20876003  | C17orf50                                                             | 0.0002264         | 0.000226395          | 0.237917           | -4.20314                     | T down vs N                            | 22.375  | 19.3094   | 13.8078    | 1         |
| cg20876028  | MTFHD1L                                                              | 1.75E-05          | 1.75E-05             | 0.288651           | -3.46439                     | T down vs N                            | 36.349  | 14.4604   | 6.36517    | 1         |
| cg20880080  | GATA6                                                                | 0.0006241         | 0.000624101          | 0.287846           | -3.47408                     | T down vs N                            | 17.978  | 14.5254   | 12.9277    | 1         |
| cg20884362  | C21orf67;C21orf67;C21orf70<br>LOC283761;LOC283761;LOC283761;L        | 0.00061093        | 0.000610929          | 0.284381           | -3.5164                      | T down vs N                            | 18.064  | 14.8093   | 13.117     | 1         |
| cg20885615  | OC283761                                                             | 0.00107322        | 0.00107322           | 0.265203           | -3.7707                      | T down vs N                            | 15.852  | 16.4996   | 16.6542    | 1         |
| cg20886721  | OR8U8                                                                | 3.51E-06          | 3.51E-06             | 0.185347           | -5.39529                     | T down vs N                            | 47.753  | 26.6092   | 8.91567    | 1         |
| cg20886791  | HLA-DPB2                                                             | 0.00024525        | 0.000245248          | 0.307208           | -3.25513                     | T down vs N                            | 22.809  | 12.2791   | 8.07533    | 1         |
| cg20888292  | KCNQ3                                                                | 0.00238985        | 0.00238985           | 0.26282            | -3.80488                     | T down vs N                            | 12.973  | 16.7248   | 20.6266    | 1         |
| cg20891481  | FOXP1                                                                | 6.93E-07          | 6.93E-07             | 0.112052           | -8.92442                     | T down vs N                            | 66.284  | 42.232    | 9.5571     | 1         |
| cg20891655  | CCDC83                                                               | 8.30E-05          | 8.30E-05             | 0.282155           | -3.54415                     | T down vs N                            | 27.326  | 14.9951   | 8.77998    | 1         |
| cg20894410  | MRPL3                                                                | 0.00019031        | 0.000190306          | 0.151981           | -6.57976                     | T down vs N                            | 23.187  | 33.2447   | 22.9403    | 1         |

| Probeset ID | UCSC_REFGENE_NAME                   | p-value<br>(Type) | p-value (T vs.<br>N) | Ratio (T<br>vs. N) | Fold-<br>Change (T<br>vs. N) | Fold-Change (T vs.<br>N) (Description) | F(Type) | SS (Type) | SS (Error) | F (Error) |
|-------------|-------------------------------------|-------------------|----------------------|--------------------|------------------------------|----------------------------------------|---------|-----------|------------|-----------|
| cg20896063  | HBG2                                | 1.41E-05          | 1.41E-05             | 0.237244           | -4.21508                     | T down vs N                            | 37.744  | 19.3857   | 8.21784    | 1         |
| cg20899379  | USP50                               | 0.00035456        | 0.000354561          | 0.256726           | -3.89521                     | T down vs N                            | 20.359  | 17.3172   | 13.6095    | 1         |
| cg20904489  | NRN1                                | 0.00217314        | 0.00217314           | 0.192341           | -5.1991                      | T down vs N                            | 13.3    | 25.4526   | 30.6208    | 1         |
| cg20905984  | NCRNA00171                          | 4.49E-05          | 4.49E-05             | 0.216318           | -4.62283                     | T down vs N                            | 30.679  | 21.9541   | 11.4496    | 1         |
| cg20906524  | OCA2                                | 0.00083346        | 0.000833464          | 0.263451           | -3.79578                     | T down vs N                            | 16.825  | 16.6649   | 15.8482    | 1         |
| cg20909773  | PLAG1;PLAG1;PLAG1                   | 1.94E-07          | 1.94E-07             | 0.255097           | -3.92007                     | T down vs N                            | 75.055  | 17.4797   | 3.72628    | 1         |
| cg20911180  | GUCY2E                              | 1.40E-05          | 1.40E-05             | 0.255178           | -3.91883                     | T down vs N                            | 37.804  | 17.4716   | 7.39452    | 1         |
| cg20912752  | PPFIBP1;PPFIBP1                     | 0.00055156        | 0.000551556          | 0.323311           | -3.093                       | T down vs N                            | 18.483  | 11.9415   | 10.3371    | 1         |
| cg20917241  | COL4A1                              | 0.00210748        | 0.00210748           | 0.24373            | -4.10291                     | T down vs N                            | 13.406  | 18.6657   | 22.278     | 1         |
| cg20922821  | CRADD                               | 0.00368105        | 0.00368105           | 0.278465           | -3.59111                     | T down vs N                            | 11.542  | 15.3087   | 21.2221    | 1         |
| cg20927656  | DPPA3                               | 1.84E-05          | 1.84E-05             | 0.200742           | -4.98151                     | T down vs N                            | 36.049  | 24.1495   | 10.7187    | 1         |
| cg20931951  | VPS13D;VPS13D                       | 2.71E-06          | 2.71E-06             | 0.146598           | -6.82137                     | T down vs N                            | 49.817  | 34.5296   | 11.0902    | 1         |
| cg20932426  | PLCH2                               | 8.76E-05          | 8.76E-05             | 0.248533           | -4.02361                     | T down vs N                            | 27.043  | 18.1531   | 10.7402    | 1         |
| cg20932721  | MUC5B                               | 0.00036424        | 0.000364243          | 0.214324           | -4.66584                     | T down vs N                            | 20.242  | 22.2205   | 17.5642    | 1         |
| cg20935368  | ZNF354B                             | 0.00032845        | 0.000328452          | 0.248823           | -4.01892                     | T down vs N                            | 20.695  | 18.1228   | 14.0116    | 1         |
| cg20938665  | PRKCDBP                             | 7.17E-05          | 7.17E-05             | 5.30817            | 5.30817                      | T up vs N                              | 28.101  | 26.0977   | 14.8592    | 1         |
| cg20941258  | LRRC2;TDGF1                         | 2.64E-05          | 2.64E-05             | 4.36934            | 4.36934                      | T up vs N                              | 33.801  | 20.3665   | 9.64063    | 1         |
| cg20942867  | SLC9A1                              | 4.13E-07          | 4.13E-07             | 0.139515           | -7.16768                     | T down vs N                            | 66.968  | 36.3337   | 8.68081    | 1         |
| cg20944195  | EBF2                                | 3.61E-05          | 3.61E-05             | 0.209827           | -4.76583                     | T down vs N                            | 31.936  | 22.8365   | 11.4413    | 1         |
| cg20944278  | C2orf66;C2orf66                     | 5.43E-06          | 5.43E-06             | 0.273778           | -3.6526                      | T down vs N                            | 44.418  | 15.7179   | 5.66182    | 1         |
| cg20945085  | C2orf65                             | 0.0001086         | 0.000108603          | 11.5148            | 11.5148                      | T up vs N                              | 25.936  | 55.9284   | 34.5029    | 1         |
| cg20945261  | NUP210                              | 4.30E-07          | 4.30E-07             | 0.297936           | -3.35642                     | T down vs N                            | 66.553  | 13.7329   | 3.30152    | 1         |
| cg20945738  | TNFSF13B;TNFSF13B;TNFSF13B;TNFSF13B | 0.00095681        | 0.000956809          | 0.317415           | -3.15045                     | T down vs N                            | 16.289  | 12.3339   | 12.1148    | 1         |
| cg20947127  | TBC1D26                             | 0.00451456        | 0.00451456           | 0.282875           | -3.53513                     | T down vs N                            | 10.893  | 14.9347   | 21.936     | 1         |
| cg20948486  | PEAR1                               | 4.25E-05          | 4.25E-05             | 5.24703            | 5.24703                      | T up vs N                              | 30.996  | 25.7368   | 13.2854    | 1         |
| cg20950633  | COLQ;COLQ;COLQ;COLQ                 | 3.19E-05          | 3.19E-05             | 0.267542           | -3.73773                     | T down vs N                            | 32.671  | 16.282    | 7.97375    | 1         |
| cg20951266  | SMCP                                | 1.27E-05          | 1.27E-05             | 0.187552           | -5.33187                     | T down vs N                            | 38.47   | 26.2372   | 10.9123    | 1         |
| cg20954219  | ALK                                 | 5.25E-05          | 5.25E-05             | 0.306742           | -3.26007                     | T down vs N                            | 29.804  | 13.0801   | 7.02195    | 1         |
| cg20955839  | SULT1C2;SULT1C2                     | 3.69E-05          | 3.69E-05             | 0.28555            | -3.50201                     | T down vs N                            | 31.808  | 14.7129   | 7.40084    | 1         |
| cg20956278  | SLC16A8                             | 0.00151691        | 0.00151691           | 3.05538            | 3.05538                      | T up vs N                              | 14.571  | 11.684    | 12.8303    | 1         |
| cg20960642  | KRTAP17-1                           | 0.00031356        | 0.000313564          | 0.306489           | -3.26276                     | T down vs N                            | 20.9    | 13.0984   | 10.0276    | 1         |
| cg20961591  | SPINT2;SPINT2                       | 0.00246977        | 0.00246977           | 11.4265            | 11.4265                      | T up vs N                              | 12.861  | 55.5767   | 69.1392    | 1         |
| cg20965743  | ASPG                                | 0.00015566        | 0.000155656          | 5.81935            | 5.81935                      | T up vs N                              | 24.149  | 29.0518   | 19.2481    | 1         |
| cg20966549  | NAV2;NAV2;NAV2                      | 2.48E-05          | 2.48E-05             | 0.182764           | -5.47152                     | T down vs N                            | 34.19   | 27.0541   | 12.6607    | 1         |
| cg20969923  | NIN;NIN;NIN                         | 8.20E-05          | 8.20E-05             | 0.329562           | -3.03433                     | T down vs N                            | 27.387  | 11.5399   | 6.7417     | 1         |
| cg20971488  | DUSP5P                              | 2.38E-05          | 2.38E-05             | 3.42286            | 3.42286                      | T up vs N                              | 34.441  | 14.181    | 6.58791    | 1         |
| cg20971927  | GPX6                                | 2.22E-05          | 2.22E-05             | 0.239313           | -4.17863                     | T down vs N                            | 34.854  | 19.1524   | 8.79218    | 1         |
| cg20972466  | DPEP1                               | 1.83E-06          | 1.83E-06             | 0.205838           | -4.85819                     | T down vs N                            | 53.06   | 23.4014   | 7.05664    | 1         |
| cg20974196  | CFD                                 | 8.02E-06          | 8.02E-06             | 0.15913            | -6.28419                     | T down vs N                            | 41.605  | 31.6424   | 12.1686    | 1         |
| cg20976787  | PTK7;PTK7;PTK7;PTK7                 | 0.00043677        | 0.000436767          | 0.317506           | -3.14955                     | T down vs N                            | 19.461  | 12.3278   | 10.1356    | 1         |
| cg20979153  | ZNF217                              | 0.00020584        | 0.000205844          | 0.204328           | -4.8941                      | T down vs N                            | 22.818  | 23.62     | 16.5625    | 1         |
| cg20979233  | RGS20                               | 0.0004307         | 0.000430698          | 0.23559            | -4.24467                     | T down vs N                            | 20.172  | 18.4233   | 13.6998    | 1         |
| cg20981615  | TKX                                 | 9.24E-05          | 9.24E-05             | 0.273384           | -3.65786                     | T down vs N                            | 26.765  | 15.7529   | 9.41688    | 1         |
| cg20982735  | PSKH2                               | 0.00040976        | 0.000409764          | 5.37808            | 5.37808                      | T up vs N                              | 19.733  | 26.5085   | 21.4937    | 1         |
| cg20985269  | OR10Z1                              | 1.56E-06          | 1.56E-06             | 0.194799           | -5.13351                     | T down vs N                            | 54.449  | 25.062    | 7.36451    | 1         |
| cg20985450  | ZIC5                                | 0.00523299        | 0.00523299           | 21.0308            | 21.0308                      | T up vs N                              | 10.435  | 86.8997   | 133.242    | 1         |
| cg20985479  | FGF12                               | 0.00011864        | 0.000118641          | 5.77219            | 5.77219                      | T up vs N                              | 25.489  | 28.784    | 18.0681    | 1         |
| cg20985521  | C1orf175;C1orf175                   | 0.00019172        | 0.000191717          | 0.332802           | -3.00479                     | T down vs N                            | 23.152  | 11.3373   | 7.83505    | 1         |
| cg20987610  | CDH17;CDH17                         | 3.79E-05          | 3.79E-05             | 0.149804           | -6.67538                     | T down vs N                            | 31.647  | 33.7558   | 17.0664    | 1         |
| cg20988440  | MIR16-1;MIR15A;DLEU2                | 0.00209271        | 0.00209271           | 0.331498           | -3.01661                     | T down vs N                            | 13.43   | 11.4184   | 13.6034    | 1         |
| cg20991347  | PARVB;PARVB                         | 0.00140898        | 0.00140898           | 6.62991            | 6.62991                      | T up vs N                              | 14.839  | 33.5132   | 36.1355    | 1         |
| cg20992429  | TUBGCP3                             | 0.00020021        | 0.00020021           | 0.32101            | -3.11517                     | T down vs N                            | 22.948  | 12.093    | 8.43165    | 1         |
| cg20992439  | FES;FES;FES;FES                     | 0.00054325        | 0.000543254          | 0.329845           | -3.03173                     | T down vs N                            | 18.546  | 11.522    | 9.9403     | 1         |
| cg20994097  | S100A10                             | 0.00018308        | 0.000183076          | 0.328179           | -3.04712                     | T down vs N                            | 23.371  | 11.6275   | 7.96045    | 1         |
| cg20995172  | C6orf47                             | 1.48E-05          | 1.48E-05             | 0.252519           | -3.9601                      | T down vs N                            | 37.465  | 17.7406   | 7.57641    | 1         |
| cg20996351  | MAP3K6                              | 0.00380837        | 0.00380837           | 5.51885            | 5.51885                      | T up vs N                              | 11.432  | 27.329    | 38.2477    | 1         |
| cg20998511  | IL19                                | 1.13E-06          | 1.13E-06             | 0.270966           | -3.6905                      | T down vs N                            | 57.245  | 15.9694   | 4.46343    | 1         |
| cg21001198  | LRRN4                               | 0.00019091        | 0.000190907          | 45.2183            | 45.2183                      | T up vs N                              | 23.172  | 136.067   | 93.9527    | 1         |
| cg21001441  | ATAD3C                              | 0.00034072        | 0.000340716          | 0.289721           | -3.45159                     | T down vs N                            | 20.533  | 14.3744   | 11.2008    | 1         |
| cg21003380  | TMEM79;TMEM79                       | 0.00070602        | 0.000706022          | 4.35761            | 4.35761                      | T up vs N                              | 17.481  | 20.2923   | 18.5735    | 1         |
| cg21004924  | MAD1L1;MAD1L1;MAD1L1                | 0.0006274         | 0.000627397          | 0.14845            | -6.7363                      | T down vs N                            | 17.956  | 34.0797   | 30.367     | 1         |
| cg21005416  | ECE1;ECE1;ECE1;ECE1                 | 2.38E-05          | 2.38E-05             | 0.212746           | -4.70045                     | T down vs N                            | 34.437  | 22.4343   | 10.4234    | 1         |
| cg21006539  | DEFA4                               | 5.72E-07          | 5.72E-07             | 0.243845           | -4.10097                     | T down vs N                            | 63.695  | 18.6532   | 4.68566    | 1         |
| cg21006727  | ITGB2                               | 1.44E-05          | 1.44E-05             | 0.289775           | -3.45096                     | T down vs N                            | 37.604  | 14.3701   | 6.11434    | 1         |
| cg21008969  | PRMT8                               | 0.00021145        | 0.000211454          | 0.284341           | -3.5169                      | T down vs N                            | 22.692  | 14.8127   | 10.4443    | 1         |
| cg21009400  | FAM74A3                             | 2.44E-05          | 2.44E-05             | 0.316889           | -3.15568                     | T down vs N                            | 34.288  | 12.3696   | 5.77215    | 1         |
| cg21009972  | HIGD1B                              | 0.00068728        | 0.00068728           | 0.31312            | -3.19366                     | T down vs N                            | 17.588  | 12.6285   | 11.488     | 1         |
| cg21012061  | MFS4                                | 0.00601942        | 0.00601942           | 0.271035           | -3.68956                     | T down vs N                            | 10.009  | 15.9632   | 25.518     | 1         |
| cg21013206  | DRD2;DRD2                           | 5.02E-05          | 5.02E-05             | 0.280963           | -3.55919                     | T down vs N                            | 30.047  | 15.0955   | 8.03845    | 1         |
| cg21016445  | PDE6G;PDE6G                         | 1.00E-07          | 1.00E-07             | 0.200802           | -4.98003                     | T down vs N                            | 82.805  | 24.1406   | 4.66456    | 1         |
| cg21016855  | PAX6;PAX6;PAX6                      | 0.00608815        | 0.00608815           | 3.0285             | 3.0285                       | T up vs N                              | 9.9749  | 11.4999   | 18.4461    | 1         |

| Probeset ID                    | UCSC_REFGENE_NAME             | p-value<br>(Type) | p-value (T vs.<br>N) | Ratio (T<br>vs. N) | Fold-<br>Change (T<br>vs. N) | Fold-Change (T vs.<br>N) (Description) | F(Type) | SS (Type) | SS (Error) | F (Error) |
|--------------------------------|-------------------------------|-------------------|----------------------|--------------------|------------------------------|----------------------------------------|---------|-----------|------------|-----------|
| cg21017771                     | CLDN2;CLDN2                   | 2.18E-06          | 2.18E-06             | 0.257024           | -3.89068                     | T down vs N                            | 51.59   | 17.2876   | 5.36157    | 1         |
| cg21021766                     | PCYT1B                        | 0.00459067        | 0.00459067           | 0.29528            | -3.38662                     | T down vs N                            | 10.841  | 13.9368   | 20.569     | 1         |
| cg21022868                     | SLAMF9;SLAMF9;SLAMF9          | 1.48E-05          | 1.48E-05             | 0.315164           | -3.17295                     | T down vs N                            | 37.43   | 12.4874   | 5.33785    | 1         |
| cg21022906                     | C14orf182;C14orf182           | 0.00616658        | 0.00616658           | 0.2712             | -3.68732                     | T down vs N                            | 9.9364  | 15.9484   | 25.6807    | 1         |
| cg21023001                     | CD93                          | 1.05E-06          | 1.05E-06             | 0.186189           | -5.37087                     | T down vs N                            | 57.921  | 26.4662   | 7.311      | 1         |
| cg21032008                     | GRM7;GRM7                     | 1.03E-05          | 1.03E-05             | 0.287188           | -3.48204                     | T down vs N                            | 39.881  | 14.5789   | 5.84901    | 1         |
| cg21032728                     | HSPA2                         | 0.00520953        | 0.00520953           | 3.32445            | 3.32445                      | T up vs N                              | 10.667  | 12.7215   | 17.8893    | 1         |
| cg21033440                     | SIPA1;SIPA1                   | 0.00332205        | 0.00332205           | 5.43124            | 5.43124                      | T up vs N                              | 11.874  | 26.8193   | 36.1374    | 1         |
| cg21033494                     | MSMB;MSMB                     | 0.00037684        | 0.00037684           | 0.194023           | -5.15403                     | T down vs N                            | 20.094  | 25.1844   | 20.0533    | 1         |
| cg21034676                     | TGFB1                         | 0.0009761         | 0.000976098          | 5.15015            | 5.15015                      | T up vs N                              | 16.213  | 25.1613   | 24.8311    | 1         |
| cg21035222                     | HSPA2                         | 7.36E-05          | 7.36E-05             | 19.0985            | 19.0985                      | T up vs N                              | 30.624  | 17.3016   | 32.5958    | 1         |
| cg21038682                     | AHNAK;AHNAK                   | 4.97E-05          | 4.97E-05             | 4.21504            | 4.21504                      | T up vs N                              | 30.102  | 19.3855   | 10.3039    | 1         |
| cg21038932                     | HLA-DQB2                      | 2.95E-05          | 2.95E-05             | 0.13753            | -7.27112                     | T down vs N                            | 33.133  | 36.8643   | 17.8017    | 1         |
| cg21039196                     | SMAP1;SMAP1                   | 0.00013599        | 0.000135986          | 0.27536            | -3.6316                      | T down vs N                            | 24.81   | 15.5784   | 10.0464    | 1         |
| cg21042248                     | MGC2752                       | 0.00170132        | 0.00170132           | 4.33602            | 4.33602                      | T up vs N                              | 14.158  | 20.1556   | 22.7773    | 1         |
| cg21044104                     | LYZL4                         | 1.68E-06          | 1.68E-06             | 0.319414           | -3.13073                     | T down vs N                            | 53.807  | 12.1993   | 3.6276     | 1         |
| cg21044630                     | MSH5;MSH5;MSH5;MSH5           | 5.45E-05          | 5.45E-05             | 0.268239           | -3.72802                     | T down vs N                            | 29.595  | 16.2178   | 8.76789    | 1         |
| cg21045711                     | NUDT6;SPATA5                  | 5.83E-05          | 5.83E-05             | 0.233317           | -4.28601                     | T down vs N                            | 29.223  | 19.8381   | 10.8617    | 1         |
| cg21046119                     | NCKAP5;NCKAP5                 | 0.00141524        | 0.00141524           | 0.255127           | -3.91962                     | T down vs N                            | 14.823  | 17.4767   | 18.8648    | 1         |
| cg21048938                     | LRIG3;LRIG3                   | 1.36E-05          | 1.36E-05             | 0.195686           | -5.11023                     | T down vs N                            | 38.013  | 24.923    | 10.4902    | 1         |
| cg21049958                     | CEACAM4                       | 3.12E-05          | 3.12E-05             | 0.212801           | -4.69923                     | T down vs N                            | 32.795  | 22.4267   | 10.9416    | 1         |
| cg21051519                     | PKD2L2                        | 0.00284503        | 0.00284503           | 18.7804            | 18.7804                      | T up vs N                              | 12.386  | 80.562    | 104.072    | 1         |
| cg21057473                     | ORS1B2                        | 0.00718203        | 0.00718203           | 0.259034           | -3.8605                      | T down vs N                            | 9.4832  | 17.09     | 28.8343    | 1         |
| cg21058822                     | MBOAT4                        | 0.00013807        | 0.000138066          | 0.181264           | -5.51682                     | T down vs N                            | 24.735  | 27.3172   | 17.67      | 1         |
| cg21067023                     | COLEC12                       | 0.00035741        | 0.000357413          | 3.51765            | 3.51765                      | T up vs N                              | 20.324  | 14.8177   | 11.6651    | 1         |
| cg21067745                     | FLT3LG                        | 5.45E-06          | 5.45E-06             | 0.223551           | -4.47325                     | T down vs N                            | 44.404  | 21.0209   | 7.57446    | 1         |
| cg21067775                     | EPS15L1                       | 0.0002592         | 0.000259195          | 3.95618            | 3.95618                      | T up vs N                              | 21.755  | 17.7151   | 13.0289    | 1         |
| cg21073212                     | KIF3B                         | 0.00016267        | 0.000162671          | 0.206152           | -4.85079                     | T down vs N                            | 23.936  | 23.3563   | 15.6124    | 1         |
| OSCAR;OSCAR;OSCAR;OSCAR;OSCAR; |                               |                   |                      |                    |                              |                                        |         |           |            |           |
| cg21073459                     | OSCAR;OSCAR;OSCAR             | 1.37E-06          | 1.37E-06             | 0.323794           | -3.08838                     | T down vs N                            | 55.588  | 11.9099   | 3.42805    | 1         |
| cg21074347                     | FLJ46111                      | 3.15E-05          | 3.15E-05             | 0.23218            | -4.307                       | T down vs N                            | 32.743  | 19.9715   | 9.75913    | 1         |
| cg21075900                     | PSG9                          | 1.77E-05          | 1.77E-05             | 0.227284           | -4.39978                     | T down vs N                            | 36.28   | 20.5587   | 9.06661    | 1         |
| cg21077957                     | FLJ43860                      | 3.28E-05          | 3.28E-05             | 0.245626           | -4.07122                     | T down vs N                            | 32.495  | 18.4612   | 9.09013    | 1         |
| cg21080533                     | PGK2                          | 9.05E-07          | 9.05E-07             | 0.153328           | -6.52197                     | T down vs N                            | 59.308  | 32.9341   | 8.88484    | 1         |
| cg21080562                     | SBNO2;SBNO2                   | 0.00047731        | 0.000477306          | 3.79183            | 3.79183                      | T up vs N                              | 19.085  | 16.6389   | 13.949     | 1         |
| cg21087260                     | FGG;FGG                       | 0.00012449        | 0.000124494          | 0.324388           | -3.08273                     | T down vs N                            | 25.248  | 11.8712   | 7.52284    | 1         |
| cg21088119                     | C8orf12                       | 0.00014258        | 0.00014258           | 0.27436            | -3.64484                     | T down vs N                            | 24.577  | 15.6664   | 10.1989    | 1         |
| cg21092808                     | HOXD3                         | 0.00013525        | 0.000135245          | 8.16142            | 8.16142                      | T up vs N                              | 24.837  | 41.2819   | 26.5935    | 1         |
| cg21095673                     | ATXN7L1;ATXN7L1               | 0.00401289        | 0.00401289           | 0.321136           | -3.11394                     | T down vs N                            | 11.265  | 12.0847   | 17.1637    | 1         |
| cg21099111                     | RNASE3                        | 0.00102507        | 0.00102507           | 0.282419           | -3.54084                     | T down vs N                            | 16.026  | 14.9729   | 14.9488    | 1         |
| cg21101720                     | ANKRD13B                      | 0.00012164        | 0.000121642          | 5.5351             | 5.5351                       | T up vs N                              | 25.364  | 27.4232   | 17.2988    | 1         |
| cg21104276                     | FZD1;FZD1                     | 0.00011996        | 0.000119956          | 3.59035            | 3.59035                      | T up vs N                              | 25.434  | 15.3036   | 9.62714    | 1         |
| cg21104363                     | VKORC1L1                      | 3.05E-05          | 3.05E-05             | 0.332954           | -3.00341                     | T down vs N                            | 32.923  | 11.3279   | 5.50517    | 1         |
| NSL1;TATDN3;TATDN3;TATDN3;TATD |                               |                   |                      |                    |                              |                                        |         |           |            |           |
| cg21106461                     | N3;NSL1;TATDN3                | 0.00096684        | 0.000966842          | 0.262373           | -3.81137                     | T down vs N                            | 16.249  | 16.7675   | 16.5102    | 1         |
| cg21107767                     | S100A7A                       | 2.91E-05          | 2.91E-05             | 0.294191           | -3.39915                     | T down vs N                            | 33.22   | 14.0213   | 6.75328    | 1         |
| cg21109025                     | CCL2                          | 0.00012351        | 0.000123506          | 0.28918            | -3.45806                     | T down vs N                            | 25.288  | 14.4178   | 9.12228    | 1         |
| cg21112099                     | COL12A1;COL12A1               | 3.48E-06          | 3.48E-06             | 0.299106           | -3.3433                      | T down vs N                            | 47.808  | 13.6441   | 4.56632    | 1         |
| cg21120539                     | CTS2;CTS2                     | 0.00202571        | 0.00202571           | 8.15883            | 8.15883                      | T up vs N                              | 13.543  | 41.2694   | 48.7559    | 1         |
| cg21120661                     | TRPM2                         | 0.00057877        | 0.000578768          | 0.216964           | -4.60907                     | T down vs N                            | 18.285  | 21.8687   | 19.1356    | 1         |
| cg21121609                     | FCER2;FCER2                   | 0.00150627        | 0.00150627           | 0.330351           | -3.02708                     | T down vs N                            | 14.596  | 11.4902   | 12.5955    | 1         |
| cg21121843                     | HTT                           | 5.08E-06          | 5.08E-06             | 0.32956            | -3.03435                     | T down vs N                            | 44.916  | 11.54     | 4.11077    | 1         |
| cg21123740                     | PDE5A;PDE5A;PDE5A             | 0.00014415        | 0.000144149          | 0.227814           | -4.38954                     | T down vs N                            | 24.524  | 20.4941   | 13.371     | 1         |
| cg21127537                     | TTC12                         | 6.35E-05          | 6.35E-05             | 6.52937            | 6.52937                      | T up vs N                              | 28.752  | 32.9739   | 18.3498    | 1         |
| cg21127597                     | MPZL3                         | 0.00011261        | 0.00011261           | 0.247234           | -4.04474                     | T down vs N                            | 25.752  | 18.29     | 11.3637    | 1         |
| cg21128398                     | FRMPD4                        | 9.93E-06          | 9.93E-06             | 0.279073           | -3.5833                      | T down vs N                            | 40.116  | 15.2565   | 6.0849     | 1         |
| cg21128940                     | ACPP                          | 6.20E-05          | 6.20E-05             | 0.23696            | -4.22013                     | T down vs N                            | 28.889  | 19.4181   | 10.7548    | 1         |
| cg21130861                     | TNFAIP8                       | 0.00081889        | 0.00081889           | 0.19267            | -5.19021                     | T down vs N                            | 17.401  | 23.9057   | 20.6076    | 1         |
| cg21130958                     | CRISPLD1                      | 0.0026285         | 0.0026285            | 0.290784           | -3.43898                     | T down vs N                            | 12.651  | 14.2895   | 18.0726    | 1         |
| cg21131239                     | ABCB7                         | 0.00048131        | 0.000481308          | 0.312651           | -3.19846                     | T down vs N                            | 19.05   | 12.6612   | 10.6339    | 1         |
| cg21132352                     | CHRN1                         | 0.00020071        | 0.000200714          | 3.33617            | 3.33617                      | T up vs N                              | 22.936  | 13.5959   | 9.48438    | 1         |
| cg21132536                     | ACSS2;ACSS2;ACSS2             | 1.03E-05          | 1.03E-05             | 0.227715           | -4.39146                     | T down vs N                            | 39.884  | 20.5063   | 8.22641    | 1         |
| cg21134232                     | HoxA3;HoxA3                   | 0.00164203        | 0.00164203           | 4.41038            | 4.41038                      | T up vs N                              | 14.285  | 20.6256   | 23.1016    | 1         |
| cg21142398                     | GLIS1                         | 0.00245621        | 0.00245621           | 0.306454           | -3.26314                     | T down vs N                            | 12.88   | 13.1009   | 16.2743    | 1         |
| cg21143446                     | TNFSF13B;TNFSF13B             | 0.00063623        | 0.000636233          | 0.28616            | -3.49454                     | T down vs N                            | 17.899  | 14.6628   | 13.1068    | 1         |
| cg21144589                     | ZNF783                        | 0.00045688        | 0.000456883          | 0.317915           | -3.14549                     | T down vs N                            | 19.27   | 12.3001   | 10.213     | 1         |
| cg21144941                     | CECR1;CECR1                   | 0.0002744         | 0.000274402          | 6.5429             | 6.5429                       | T up vs N                              | 21.497  | 33.0467   | 24.5968    | 1         |
| cg21145449                     | NAALADL2                      | 0.00084218        | 0.000842175          | 0.290293           | -3.4448                      | T down vs N                            | 16.784  | 14.3287   | 13.6595    | 1         |
| HHAT;HHAT;HHAT;HHAT;HHAT;HHAT  |                               |                   |                      |                    |                              |                                        |         |           |            |           |
| cg21147040                     | HHAT;HHAT;HHAT;HHAT;HHAT;HHAT | 0.00286515        | 0.00286515           | 0.300131           | -3.33188                     | T down vs N                            | 12.362  | 13.5669   | 17.5593    | 1         |
| cg21147310                     | MCOLN3                        | 8.29E-05          | 8.29E-05             | 0.331672           | -3.01503                     | T down vs N                            | 27.328  | 11.4075   | 6.679      | 1         |
| cg21147648                     | LBXCOR1                       | 1.82E-05          | 1.82E-05             | 4.13151            | 4.13151                      | T up vs N                              | 36.121  | 18.8498   | 8.34973    | 1         |

| Probeset ID                       | UCSC_REFGENE_NAME                   | p-value<br>(Type) | p-value (T vs.<br>N) | Ratio (T<br>vs. N) | Fold-<br>Change (T<br>vs. N) | Fold-Change (T vs.<br>N) (Description) | F(Type) | SS (Type) | SS (Error) | F (Error) |
|-----------------------------------|-------------------------------------|-------------------|----------------------|--------------------|------------------------------|----------------------------------------|---------|-----------|------------|-----------|
| cg21147708                        | SNRNP48                             | 7.01E-06          | 7.01E-06             | 0.21066            | -4.747                       | T down vs N                            | 42.562  | 22.7208   | 8.54121    | 1         |
| cg21147829                        | LLPH                                | 0.0005013         | 0.000501296          | 0.248221           | -4.02866                     | T down vs N                            | 18.88   | 18.1859   | 15.4118    | 1         |
| cg21148923                        | HCN1                                | 1.93E-05          | 1.93E-05             | 0.11406            | -8.76732                     | T down vs N                            | 35.727  | 44.1462   | 19.7702    | 1         |
| cg21151122                        | GPR35;GPR35                         | 0.0002585         | 0.000258497          | 0.191344           | -5.22619                     | T down vs N                            | 21.767  | 25.6133   | 18.8272    | 1         |
| cg21151960                        | EXOC3;C5orf55                       | 2.51E-05          | 2.51E-05             | 0.201599           | -4.96034                     | T down vs N                            | 34.104  | 24.0216   | 11.2697    | 1         |
| cg21153160                        | FAM50B;FAM50B                       | 0.00662709        | 0.00662709           | 3.21269            | 3.21269                      | T up vs N                              | 9.7211  | 12.758    | 20.9985    | 1         |
| cg21154426                        | RFT1                                | 0.0004852         | 0.000485204          | 0.301658           | -3.31501                     | T down vs N                            | 19.017  | 13.4527   | 11.3188    | 1         |
| LGALS9;LGALS9;LGALS9;LGALS9;LGALS |                                     |                   |                      |                    |                              |                                        |         |           |            |           |
| cg21157094                        | 9                                   | 1.17E-05          | 1.17E-05             | 0.271579           | -3.68217                     | T down vs N                            | 39.012  | 15.9142   | 6.52689    | 1         |
| cg21158411                        | PIP5KL1;PIP5KL1;PIP5KL1             | 9.98E-05          | 9.98E-05             | 12.1837            | 12.1837                      | T up vs N                              | 26.368  | 58.5433   | 35.5237    | 1         |
| cg21164019                        | OPCML;OPCML                         | 0.0010635         | 0.0010635            | 0.293645           | -3.40547                     | T down vs N                            | 15.886  | 14.0639   | 14.1649    | 1         |
| cg21167643                        | CAPN2;CAPN2                         | 0.00058969        | 0.000589692          | 4.58773            | 4.58773                      | T up vs N                              | 18.209  | 21.7361   | 19.0995    | 1         |
| cg21170029                        | LAMB3;LAMB3;LAMB3                   | 3.66E-05          | 3.66E-05             | 0.299187           | -3.34239                     | T down vs N                            | 31.849  | 13.638    | 6.85127    | 1         |
| cg21174750                        | PRPF4;CDC26                         | 4.34E-06          | 4.34E-06             | 0.206769           | -4.83631                     | T down vs N                            | 46.115  | 23.268    | 8.07301    | 1         |
| cg21176629                        | SNHG6                               | 3.51E-06          | 3.51E-06             | 0.302791           | -3.3026                      | T down vs N                            | 47.743  | 13.3687   | 4.48024    | 1         |
| cg21176643                        | RFX4                                | 0.00160125        | 0.00160125           | 15.9632            | 15.9632                      | T up vs N                              | 14.375  | 71.8804   | 80.004     | 1         |
| cg21177626                        | FAM50B                              | 0.00031207        | 0.000312068          | 3.78735            | 3.78735                      | T up vs N                              | 20.921  | 16.6093   | 12.7025    | 1         |
| cg21180956                        | ESM1;ESM1                           | 3.67E-05          | 3.67E-05             | 0.265405           | -3.76782                     | T down vs N                            | 31.843  | 16.4806   | 8.2809     | 1         |
| cg21181453                        | DPM2                                | 0.00058103        | 0.000581031          | 5.52938            | 5.52938                      | T up vs N                              | 18.269  | 27.39     | 23.9879    | 1         |
| cg21182526                        | MIR548N;OSBPL6;OSBPL6               | 0.00019067        | 0.000190666          | 0.246312           | -4.05989                     | T down vs N                            | 23.178  | 18.388    | 12.6934    | 1         |
| cg21183502                        | C20orf177;PPP1R3D                   | 7.65E-06          | 7.65E-06             | 3.87217            | 3.87217                      | T up vs N                              | 44.316  | 16.1567   | 5.46867    | 1         |
| cg21184174                        | NGF                                 | 7.55E-05          | 7.55E-05             | 3.0128             | 3.0128                       | T up vs N                              | 27.827  | 11.3922   | 6.55034    | 1         |
| PCDHGA4;PCDHGA11;PCDHGA11;PCD     |                                     |                   |                      |                    |                              |                                        |         |           |            |           |
| HGA9;PCDHGA1;PCDHGB1;PCDHGB6;     |                                     |                   |                      |                    |                              |                                        |         |           |            |           |
| cg21185686                        | PCDHGA12;PCDHGB3;PCDHGB7;PCDH       | 0.00175674        | 0.00175674           | 4.25749            | 4.25749                      | T up vs N                              | 14.044  | 19.6565   | 22.3937    | 1         |
| cg21187108                        | PPFIA1;PPFIA1                       | 0.00021952        | 0.000219518          | 0.246903           | -4.05017                     | T down vs N                            | 22.518  | 18.3252   | 13.0208    | 1         |
| cg21189321                        | IL17RC;IL17RC;IL17RC                | 0.00125553        | 0.00125553           | 0.283847           | -3.52303                     | T down vs N                            | 15.263  | 14.8537   | 15.5705    | 1         |
| cg21189611                        | C9orf3                              | 2.32E-05          | 2.32E-05             | 5.05974            | 5.05974                      | T up vs N                              | 34.578  | 24.6205   | 11.3925    | 1         |
| cg21191275                        | GTF3C5;GTF3C5                       | 1.68E-06          | 1.68E-06             | 0.068242           | -14.6538                     | T down vs N                            | 53.771  | 67.5077   | 20.0876    | 1         |
| cg21191365                        | KCNK13                              | 0.00283954        | 0.00283954           | 0.301435           | -3.31747                     | T down vs N                            | 12.392  | 13.4693   | 17.3909    | 1         |
| cg21196487                        | S100A2                              | 0.00073024        | 0.000730241          | 0.24631            | -4.05992                     | T down vs N                            | 17.346  | 18.3882   | 16.9612    | 1         |
| NHEDC1;NHEDC1;NHEDC1;NHEDC1       |                                     |                   |                      |                    |                              |                                        |         |           |            |           |
| cg21197425                        | FGF12;FGF12;FGF12                   | 0.00139317        | 0.00139317           | 0.113702           | -8.79491                     | T down vs N                            | 14.88   | 44.2741   | 47.606     | 1         |
| cg21197774                        | CCDC107                             | 0.00453721        | 0.00453721           | 13.9211            | 13.9211                      | T up vs N                              | 10.878  | 64.9526   | 95.5395    | 1         |
| cg21200067                        | TRAPPC9;TRAPPC9                     | 0.00134427        | 0.00134427           | 0.312075           | -3.20435                     | T down vs N                            | 15.011  | 12.7013   | 13.5379    | 1         |
| cg21201272                        | ADAMTSL2                            | 4.73E-06          | 4.73E-06             | 0.130442           | -7.66624                     | T down vs N                            | 45.458  | 38.857    | 13.6766    | 1         |
| cg21202204                        | NR1H3;NR1H3;NR1H3                   | 0.00039681        | 0.000396805          | 0.311001           | -3.21543                     | T down vs N                            | 19.871  | 12.7767   | 10.2877    | 1         |
| cg21203569                        | ATP8B4                              | 0.00044521        | 0.00044521           | 0.298759           | -3.34718                     | T down vs N                            | 20.023  | 12.8662   | 9.63863    | 1         |
| cg21204588                        | PALM2;PALM2                         | 0.00321251        | 0.00321251           | 0.298731           | -3.3475                      | T down vs N                            | 11.984  | 13.6725   | 18.2542    | 1         |
| cg21204870                        | GUCY1B3                             | 4.27E-06          | 4.27E-06             | 0.190963           | -5.23663                     | T down vs N                            | 46.234  | 25.6751   | 8.88535    | 1         |
| cg21205139                        | COLEC11;COLEC11                     | 1.11E-06          | 1.11E-06             | 0.219697           | -4.55172                     | T down vs N                            | 57.45   | 21.5118   | 5.99107    | 1         |
| cg21205320                        | OR2L3;OR2L13                        | 2.31E-06          | 2.31E-06             | 0.295978           | -3.37862                     | T down vs N                            | 51.099  | 13.8828   | 4.34699    | 1         |
| cg21207403                        | FAM189A1                            | 5.49E-06          | 5.49E-06             | 0.238395           | -4.19472                     | T down vs N                            | 44.34   | 19.2555   | 6.94829    | 1         |
| cg21207450                        | LIG3;LIG3                           | 7.33E-06          | 7.33E-06             | 0.146618           | -6.82043                     | T down vs N                            | 42.241  | 34.5246   | 13.0771    | 1         |
| cg21207593                        | FAM78A                              | 5.56E-06          | 5.56E-06             | 0.142065           | -7.03901                     | T down vs N                            | 44.245  | 35.6685   | 12.8986    | 1         |
| cg21207741                        | PANX1                               | 0.0001107         | 0.000110703          | 0.269664           | -3.70832                     | T down vs N                            | 25.839  | 16.0874   | 9.96182    | 1         |
| cg21208539                        | RABIF                               | 0.00037209        | 0.000372085          | 0.274662           | -3.64083                     | T down vs N                            | 20.149  | 15.6397   | 12.4192    | 1         |
| cg21208943                        | LOC158381;LOC158381                 | 9.04E-05          | 9.04E-05             | 0.132632           | -7.53966                     | T down vs N                            | 26.88   | 38.2244   | 22.7523    | 1         |
| cg21209395                        | TRIM14;TRIM14;TRIM14;TRIM14         | 0.0001034         | 0.000103403          | 3.18669            | 3.18669                      | T up vs N                              | 27.265  | 11.8409   | 6.51443    | 1         |
| cg21210642                        | LSG1                                | 6.61E-05          | 6.61E-05             | 0.285521           | -3.50236                     | T down vs N                            | 28.539  | 14.7152   | 8.24999    | 1         |
| cg21212034                        | CFTR                                | 0.00040138        | 0.000401382          | 0.204924           | -4.87985                     | T down vs N                            | 19.822  | 23.5333   | 18.996     | 1         |
| cg21212505                        | C9orf116;C9orf116                   | 6.91E-06          | 6.91E-06             | 0.309737           | -3.22855                     | T down vs N                            | 42.667  | 12.8659   | 4.82473    | 1         |
| cg21213388                        | HOXC4                               | 0.00018498        | 0.000184979          | 0.227815           | -4.38953                     | T down vs N                            | 23.321  | 20.4941   | 14.0602    | 1         |
| cg21216477                        | TRH                                 | 0.00632839        | 0.00632839           | 5.85689            | 5.85689                      | T up vs N                              | 9.8587  | 29.2644   | 47.4939    | 1         |
| cg21217577                        | C12orf11                            | 4.59E-05          | 4.59E-05             | 11.079             | 11.079                       | T up vs N                              | 30.551  | 54.1764   | 28.373     | 1         |
| cg21226442                        | STEAP4                              | 5.47E-05          | 5.47E-05             | 0.281039           | -3.55822                     | T down vs N                            | 29.577  | 15.0891   | 8.16272    | 1         |
| cg21227610                        | PCSK6;PCSK6;PCSK6;PCSK6;PCSK6;PCSK6 | 8.29E-05          | 8.29E-05             | 9.46688            | 9.46688                      | T up vs N                              | 27.329  | 47.3235   | 27.7063    | 1         |
| cg21230427                        | ADRA1A;ADRA1A;ADRA1A;ADRA1A;A       | 0.00351451        | 0.00351451           | 0.328428           | -3.04481                     | T down vs N                            | 11.691  | 11.6116   | 15.8911    | 1         |
| cg21230493                        | DRA1A;ADRA1A;ADRA1A;ADRA1A          | 0.00024115        | 0.000241154          | 8.41322            | 8.41322                      | T up vs N                              | 22.084  | 42.4855   | 30.7808    | 1         |
| cg21233003                        | GRIN1;GRIN1;GRIN1                   | 5.95E-05          | 5.95E-05             | 23.8921            | 23.8921                      | T up vs N                              | 29.114  | 94.3305   | 51.8401    | 1         |
| cg21233722                        | DOCK2                               | 8.10E-05          | 8.10E-05             | 3.72817            | 3.72817                      | T up vs N                              | 27.453  | 16.2188   | 9.45259    | 1         |
| cg21234032                        | AIG1                                | 0.00021254        | 0.000212539          | 0.298213           | -3.3533                      | T down vs N                            | 22.668  | 13.7118   | 9.67821    | 1         |
| cg21236569                        | RAB34;RAB34;RAB34;RAB34;RAB34;R     | 2.99E-05          | 2.99E-05             | 0.310491           | -3.2207                      | T down vs N                            | 33.057  | 12.8126   | 6.20148    | 1         |
| cg21237418                        | AB34;RAB34                          | 0.0022006         | 0.0022006            | 4.80824            | 4.80824                      | T up vs N                              | 13.256  | 23.0964   | 27.877     | 1         |
| cg21237588                        | MLL5;MLL5                           | 3.52E-05          | 3.52E-05             | 0.109805           | -9.10709                     | T down vs N                            | 32.087  | 45.7061   | 22.7909    | 1         |
| cg21237687                        | ALOX12                              | 1.36E-05          | 1.36E-05             | 4.15821            | 4.15821                      | T up vs N                              | 38.016  | 19.0214   | 8.00558    | 1         |
| cg21238276                        | CEP78;CEP78                         | 7.57E-06          | 7.57E-06             | 0.22913            | -4.36434                     | T down vs N                            | 42.013  | 20.3349   | 7.74433    | 1         |

| Probeset ID | UCSC_REFGENE_NAME             | p-value<br>(Type) | p-value (T vs.<br>N) | Ratio (T<br>vs. N) | Fold-<br>Change (T<br>vs. N) | Fold-Change (T vs.<br>N) (Description) | F(Type) | SS (Type) | SS (Error) | F (Error) |
|-------------|-------------------------------|-------------------|----------------------|--------------------|------------------------------|----------------------------------------|---------|-----------|------------|-----------|
| cg21238457  | WNT11                         | 0.00334163        | 0.00334163           | 3.05396            | 3.05396                      | T up vs N                              | 11.855  | 11.6743   | 15.7559    | 1         |
| cg21239227  | MYT1L                         | 0.0011691         | 0.0011691            | 0.279313           | -3.58021                     | T down vs N                            | 15.529  | 15.2359   | 15.6978    | 1         |
| cg21242004  | VTI1A;ZDHHC6                  | 1.73E-05          | 1.73E-05             | 0.174275           | -5.73805                     | T down vs N                            | 36.441  | 28.5895   | 12.5526    | 1         |
| cg21248478  | CLIC2;CLIC2                   | 7.62E-06          | 7.62E-06             | 0.258069           | -3.87493                     | T down vs N                            | 41.967  | 17.1845   | 6.55166    | 1         |
| cg21248554  | KRTCAP3;KRTCAP3               | 9.33E-05          | 9.33E-05             | 6.12148            | 6.12148                      | T up vs N                              | 26.714  | 30.7457   | 18.4146    | 1         |
| cg21250721  | GRIN1;GRIN1;GRIN1             | 0.00435463        | 0.00435463           | 9.77613            | 9.77613                      | T up vs N                              | 11.007  | 48.6866   | 70.7746    | 1         |
| cg21251970  | EXD3                          | 0.00026393        | 0.000263933          | 3.15088            | 3.15088                      | T up vs N                              | 21.673  | 12.3369   | 9.10782    | 1         |
| cg21252280  | SLC4A11                       | 0.00049023        | 0.000490229          | 0.133284           | -7.50276                     | T down vs N                            | 18.973  | 38.0389   | 32.0778    | 1         |
| cg21253427  | SPATA5L1;SPATA5L1             | 0.00333083        | 0.00333083           | 0.295945           | -3.379                       | T down vs N                            | 11.866  | 13.8853   | 18.7232    | 1         |
| cg21254135  | CCDC146                       | 0.00031886        | 0.00031886           | 0.324326           | -3.08332                     | T down vs N                            | 20.826  | 11.8753   | 9.1236     | 1         |
| cg21254883  | MYL5                          | 0.00028882        | 0.000288819          | 0.206015           | -4.85402                     | T down vs N                            | 21.266  | 23.3759   | 17.5872    | 1         |
| cg21264531  | UBE3C                         | 0.00163479        | 0.00163479           | 0.28545            | -3.50324                     | T down vs N                            | 14.301  | 14.7211   | 16.4701    | 1         |
| cg21264972  | BTN2A2;BTN2A2                 | 0.00294375        | 0.00294375           | 0.323275           | -3.09334                     | T down vs N                            | 12.272  | 11.9438   | 15.5719    | 1         |
| cg21265341  | MAGEB16                       | 0.00215128        | 0.00215128           | 0.254849           | -3.9239                      | T down vs N                            | 13.334  | 17.5046   | 21.0038    | 1         |
| cg21267792  | PIM2                          | 0.00080841        | 0.000808409          | 0.321652           | -3.10895                     | T down vs N                            | 16.944  | 12.0505   | 11.3791    | 1         |
| cg21270243  | ATIC                          | 2.05E-05          | 2.05E-05             | 0.141043           | -7.09005                     | T down vs N                            | 37.163  | 33.8194   | 13.6503    | 1         |
| cg21272465  | LOC151174;LOC643387;LOC151174 | 0.00017384        | 0.000173835          | 13.6306            | 13.6306                      | T up vs N                              | 23.617  | 63.9165   | 43.3013    | 1         |
| cg21275920  | OR2F1                         | 0.00014657        | 0.00014657           | 0.233592           | -4.28097                     | T down vs N                            | 24.442  | 19.8061   | 12.9652    | 1         |
| cg21277889  | LOC646762                     | 1.21E-06          | 1.21E-06             | 0.265607           | -3.76496                     | T down vs N                            | 56.685  | 16.4618   | 4.6465     | 1         |
| cg21280392  | PHOSPHO1;PHOSPHO1             | 2.16E-06          | 2.16E-06             | 0.216345           | -4.62226                     | T down vs N                            | 51.672  | 21.9506   | 6.7969     | 1         |
| cg21280719  | GNMT                          | 0.00336115        | 0.00336115           | 4.20399            | 4.20399                      | T up vs N                              | 11.836  | 19.3148   | 26.1095    | 1         |
| cg21282997  | IL18RAP                       | 4.87E-06          | 4.87E-06             | 0.189682           | -5.27197                     | T down vs N                            | 45.232  | 25.8842   | 9.15615    | 1         |
| cg21283680  | SH3BP5                        | 0.00011592        | 0.000115917          | 0.297471           | -3.36167                     | T down vs N                            | 26.645  | 12.9584   | 7.29507    | 1         |
| cg21286782  | FAM19A3;FAM19A3               | 0.0043183         | 0.0043183            | 0.294993           | -3.38991                     | T down vs N                            | 11.033  | 13.959    | 20.2433    | 1         |
| cg21287554  | PEBP4                         | 0.00061109        | 0.000611091          | 0.199631           | -5.00924                     | T down vs N                            | 18.063  | 24.3168   | 21.5393    | 1         |
| cg21288315  | ZNF548                        | 0.00046995        | 0.00046995           | 0.251001           | -3.98405                     | T down vs N                            | 19.151  | 17.8964   | 14.952     | 1         |
| cg21288685  | TTL10                         | 0.00252698        | 0.00252698           | 3.72019            | 3.72019                      | T up vs N                              | 12.784  | 16.166    | 20.2332    | 1         |
| cg21290814  | CRTC1;CRTC1                   | 0.00061568        | 0.000615676          | 0.217401           | -4.59979                     | T down vs N                            | 18.033  | 21.8111   | 19.3524    | 1         |
| cg21291134  | APCS                          | 1.52E-05          | 1.52E-05             | 0.066493           | -15.0392                     | T down vs N                            | 37.283  | 68.8196   | 29.5341    | 1         |
| cg21292033  | SEPT9;SEPT9;SEPT9;SEPT9;SEPT9 | 0.00075391        | 0.000753905          | 0.295166           | -3.38793                     | T down vs N                            | 17.22   | 13.9456   | 12.9579    | 1         |
| cg21293117  | C17orf77;CD300LD              | 5.67E-06          | 5.67E-06             | 0.327551           | -3.05296                     | T down vs N                            | 44.105  | 11.6675   | 4.23263    | 1         |
| cg21293846  | CENPI                         | 4.10E-05          | 4.10E-05             | 0.298495           | -3.35014                     | T down vs N                            | 31.203  | 13.6904   | 7.02006    | 1         |
| cg21295295  | TMEM79;TMEM79                 | 0.00132791        | 0.00132791           | 0.282017           | -3.54589                     | T down vs N                            | 15.056  | 15.0067   | 15.9472    | 1         |
| cg21296513  | NRGN;NRGN                     | 0.00197088        | 0.00197088           | 3.52298            | 3.52298                      | T up vs N                              | 13.639  | 14.8534   | 17.4246    | 1         |
| cg21297314  | HLA-E                         | 5.62E-05          | 5.62E-05             | 0.242988           | -4.11543                     | T down vs N                            | 29.42   | 18.7464   | 10.1953    | 1         |
| cg21297395  | WRB;WRB                       | 0.0017593         | 0.0017593            | 3.10565            | 3.10565                      | T up vs N                              | 14.039  | 12.028    | 13.708     | 1         |
| cg21301514  | KIF26B                        | 8.16E-07          | 8.16E-07             | 0.283082           | -3.53254                     | T down vs N                            | 60.281  | 14.9174   | 3.9594     | 1         |
| cg21306329  | SLC16A5                       | 0.00733526        | 0.00733526           | 3.00253            | 3.00253                      | T up vs N                              | 9.4211  | 11.3219   | 19.228     | 1         |
| cg21306843  | CDX4                          | 0.00010214        | 0.000102137          | 0.320557           | -3.11957                     | T down vs N                            | 26.249  | 12.1231   | 7.38971    | 1         |
| cg21308111  | TNFRSF10A;TNFRSF10A           | 0.00179854        | 0.00179854           | 3.60414            | 3.60414                      | T up vs N                              | 13.961  | 15.3955   | 17.6441    | 1         |
| cg21308575  | EMR1                          | 0.0028688         | 0.0028688            | 0.292294           | -3.42121                     | T down vs N                            | 12.358  | 14.1699   | 18.346     | 1         |
| cg21312148  | LCE2D                         | 0.00096076        | 0.000960757          | 0.203434           | -4.91561                     | T down vs N                            | 16.274  | 23.7506   | 23.3514    | 1         |
| cg21313830  | SQRDL                         | 0.00205044        | 0.00205044           | 0.284193           | -3.51873                     | T down vs N                            | 13.501  | 14.8249   | 17.569     | 1         |
| cg21315873  | WDR69                         | 0.00205916        | 0.00205916           | 0.327668           | -3.05187                     | T down vs N                            | 13.486  | 11.66     | 13.8334    | 1         |
| cg21319411  | KRTAP4-1                      | 3.70E-06          | 3.70E-06             | 0.225551           | -4.43358                     | T down vs N                            | 47.338  | 20.7717   | 7.0207     | 1         |
| cg21322241  | MBP;MBP;MBP;MBP;MBP           | 0.00165303        | 0.00165303           | 3.62629            | 3.62629                      | T up vs N                              | 14.261  | 15.543    | 17.4381    | 1         |
| cg21322452  | CCDC64B                       | 4.51E-05          | 4.51E-05             | 0.330999           | -3.02115                     | T down vs N                            | 30.659  | 11.4495   | 5.97521    | 1         |
| cg21322654  | SLC26A4;LOC286002             | 0.00019498        | 0.000194984          | 5.33224            | 5.33224                      | T up vs N                              | 23.072  | 26.2394   | 18.1963    | 1         |
| cg21324456  | ATP9A                         | 0.00014107        | 0.000141069          | 0.230603           | -4.33646                     | T down vs N                            | 24.63   | 20.1584   | 13.0954    | 1         |
| cg21326613  | C7orf10                       | 4.40E-06          | 4.40E-06             | 0.090244           | -11.0811                     | T down vs N                            | 46.004  | 54.185    | 18.8455    | 1         |
| cg21327194  | GPRC5C;GPRC5C                 | 0.0004146         | 0.000414604          | 0.200063           | -4.99843                     | T down vs N                            | 19.683  | 24.2516   | 19.714     | 1         |
| cg21327235  | DNAH2                         | 4.52E-05          | 4.52E-05             | 0.244235           | -4.09442                     | T down vs N                            | 30.644  | 18.6109   | 9.71719    | 1         |
| cg21327826  | NDOR1;NDOR1;NDOR1;NDOR1       | 1.64E-06          | 1.64E-06             | 0.182529           | -5.47858                     | T down vs N                            | 53.998  | 27.0952   | 8.0285     | 1         |
| cg21328779  | PHLDB2;PHLDB2;PHLDB2;PHLDB2   | 0.00116015        | 0.00116015           | 0.318573           | -3.139                       | T down vs N                            | 15.558  | 12.2558   | 12.6039    | 1         |
| cg21328786  | PAGE1                         | 0.00013515        | 0.000135148          | 0.316843           | -3.15613                     | T down vs N                            | 24.841  | 12.3727   | 7.96929    | 1         |
| cg21333406  | GRK4;GRK4;GRK4                | 0.00206241        | 0.00206241           | 0.235785           | -4.24115                     | T down vs N                            | 13.481  | 19.5523   | 23.2063    | 1         |
| cg21334598  | HRK                           | 0.00063498        | 0.000634979          | 4.11183            | 4.11183                      | T up vs N                              | 17.907  | 18.7232   | 16.7289    | 1         |
| cg21337580  | MTMR9                         | 9.20E-06          | 9.20E-06             | 0.279451           | -3.57845                     | T down vs N                            | 40.643  | 15.2242   | 5.99331    | 1         |
| cg21341586  | EIF4E;EIF4E;EIF4E;EIF4E;EIF4E | 0.00064531        | 0.00064531           | 0.176375           | -5.66973                     | T down vs N                            | 17.842  | 28.1989   | 25.2875    | 1         |
| cg21342392  | IMMP2L                        | 2.31E-07          | 2.31E-07             | 0.080267           | -12.4584                     | T down vs N                            | 73.138  | 59.5919   | 13.0366    | 1         |
| cg21342586  | KRTAP2-1                      | 0.00381257        | 0.00381257           | 0.209903           | -4.76412                     | T down vs N                            | 11.429  | 22.826    | 31.9555    | 1         |
| cg21346679  | ABCB11                        | 0.00109736        | 0.00109736           | 0.210851           | -4.74268                     | T down vs N                            | 15.767  | 22.6943   | 23.0292    | 1         |
| cg21347053  | GMDS                          | 0.0014752         | 0.0014752            | 12.1669            | 12.1669                      | T up vs N                              | 14.672  | 58.4785   | 63.7734    | 1         |
| cg21348565  | SLC22A25                      | 3.36E-05          | 3.36E-05             | 0.126914           | -7.87936                     | T down vs N                            | 32.361  | 39.9103   | 19.7326    | 1         |
| cg21350115  | CALCRL;CALCRL                 | 0.00131857        | 0.00131857           | 0.240045           | -4.16588                     | T down vs N                            | 15.082  | 19.0707   | 20.231     | 1         |
| cg21350498  | DAXX;DAXX;DAXX;DAXX           | 0.00159767        | 0.00159767           | 0.297218           | -3.36453                     | T down vs N                            | 14.383  | 13.7876   | 15.3373    | 1         |
| cg21351483  | TRAPPC9;TRAPPC9               | 0.00324742        | 0.00324742           | 0.141414           | -7.07145                     | T down vs N                            | 11.949  | 35.8367   | 47.9876    | 1         |
| cg21351852  | GPR84                         | 3.86E-06          | 3.86E-06             | 0.134287           | -7.44674                     | T down vs N                            | 47.004  | 37.7565   | 12.8521    | 1         |
| cg21353189  | SORCS2                        | 1.63E-05          | 1.63E-05             | 0.218212           | -4.58269                     | T down vs N                            | 36.83   | 21.7047   | 9.42915    | 1         |
| cg21359747  | ALDH1A3                       | 0.00097854        | 0.00097854           | 12.9159            | 12.9159                      | T up vs N                              | 16.203  | 61.3083   | 60.5394    | 1         |

| Probeset ID | UCSC_REFGENE_NAME                | p-value<br>(Type) | p-value (T vs.<br>N) | Ratio (T<br>vs. N) | Fold-<br>Change (T<br>vs. N) | Fold-Change (T vs.<br>N) (Description) | F(Type) | SS (Type) | SS (Error) | F (Error) |
|-------------|----------------------------------|-------------------|----------------------|--------------------|------------------------------|----------------------------------------|---------|-----------|------------|-----------|
| cg21361134  | CLRN1;CLRN1OS                    | 6.64E-06          | 6.64E-06             | 0.262337           | -3.81189                     | T down vs N                            | 42.949  | 16.7708   | 6.24777    | 1         |
| cg21361856  | CHN1;CHN1                        | 4.44E-05          | 4.44E-05             | 0.30096            | -3.3227                      | T down vs N                            | 30.748  | 13.5047   | 7.02724    | 1         |
| cg21367972  | CAV1                             | 0.00163873        | 0.00163873           | 3.36235            | 3.36235                      | T up vs N                              | 14.292  | 13.7729   | 15.4185    | 1         |
|             | LRRC27;LRRC27;LRRC27;LRRC27;LRRC |                   |                      |                    |                              |                                        |         |           |            |           |
| cg21370255  | 27                               | 0.00016734        | 0.000167337          | 0.191604           | -5.2191                      | T down vs N                            | 23.8    | 25.5713   | 17.1908    | 1         |
| cg21371003  | C17orf67                         | 0.00049442        | 0.000494415          | 0.326032           | -3.06718                     | T down vs N                            | 18.938  | 11.7648   | 9.93982    | 1         |
|             | CLEC4M;CLEC4M;CLEC4M;CLEC4M;CL   |                   |                      |                    |                              |                                        |         |           |            |           |
|             | EC4M;CLEC4M;CLEC4M;CLEC4M;CLEC   |                   |                      |                    |                              |                                        |         |           |            |           |
| cg21372914  | 4M;CLEC4M;CLEC4M;CLEC4M;CLE      | 0.00010445        | 0.000104445          | 0.319705           | -3.12788                     | T down vs N                            | 26.134  | 12.1799   | 7.45676    | 1         |
| cg21374754  | LYZL4                            | 0.00010843        | 0.000108433          | 0.26002            | -3.84586                     | T down vs N                            | 25.944  | 16.994    | 10.4806    | 1         |
| cg21375506  | PRKCA                            | 7.90E-05          | 7.90E-05             | 0.318612           | -3.13861                     | T down vs N                            | 27.585  | 12.2531   | 7.10725    | 1         |
| cg21375825  | LCT                              | 3.56E-05          | 3.56E-05             | 0.142493           | -7.01791                     | T down vs N                            | 32.025  | 35.5588   | 17.7655    | 1         |
|             | PHACTR2;PHACTR2;PHACTR2;PHACTR   |                   |                      |                    |                              |                                        |         |           |            |           |
| cg21376109  | 2                                | 0.00170181        | 0.00170181           | 0.318228           | -3.1424                      | T down vs N                            | 14.157  | 12.279    | 13.8772    | 1         |
| cg21377158  | SFMBT2                           | 3.12E-07          | 3.12E-07             | 0.166941           | -5.99014                     | T down vs N                            | 69.883  | 30.014    | 6.87178    | 1         |
| cg21377396  | KRTAP4-8                         | 0.00647508        | 0.00647508           | 0.316811           | -3.15646                     | T down vs N                            | 9.7902  | 12.3749   | 20.2241    | 1         |
| cg21377881  | CACNA11;CACNA11                  | 0.00511874        | 0.00511874           | 0.208165           | -4.80388                     | T down vs N                            | 10.503  | 23.0697   | 35.1437    | 1         |
| cg21379733  | FOXP1                            | 0.00010864        | 0.000108639          | 0.279551           | -3.57717                     | T down vs N                            | 25.934  | 15.2157   | 9.38731    | 1         |
| cg21384588  | MIR128-2;ARPP-21                 | 0.00189463        | 0.00189463           | 4.8095             | 4.8095                       | T up vs N                              | 13.777  | 23.1041   | 26.8314    | 1         |
| cg21385052  | MTMR11;MTMR11                    | 3.22E-05          | 3.22E-05             | 0.226014           | -4.42451                     | T down vs N                            | 32.605  | 20.7146   | 10.1652    | 1         |
| cg21386140  | KCNN3;KCNN3                      | 1.47E-05          | 1.47E-05             | 6.86364            | 6.86364                      | T up vs N                              | 37.482  | 34.7521   | 14.8347    | 1         |
| cg21386933  | WHAMM                            | 0.00016048        | 0.000160479          | 0.302472           | -3.30609                     | T down vs N                            | 24.002  | 13.3923   | 8.92757    | 1         |
| cg21387735  | RPS6KA2;RPS6KA2                  | 0.00447346        | 0.00447346           | 0.125862           | -7.94523                     | T down vs N                            | 10.922  | 40.2328   | 58.9386    | 1         |
| cg21396630  | RIMKLA                           | 0.00414399        | 0.00414399           | 0.232292           | -4.30492                     | T down vs N                            | 11.163  | 19.9583   | 28.6058    | 1         |
| cg21396988  | TAS1R3                           | 0.00019035        | 0.000190351          | 0.233897           | -4.27539                     | T down vs N                            | 23.186  | 19.7705   | 13.6432    | 1         |
| cg21398469  | CCNG2                            | 0.00283263        | 0.00283263           | 3.28242            | 3.28242                      | T up vs N                              | 12.4    | 13.2318   | 17.073     | 1         |
| cg21398794  | PRRT1                            | 0.00311029        | 0.00311029           | 8.21112            | 8.21112                      | T up vs N                              | 12.09   | 41.521    | 54.9477    | 1         |
| cg21399685  | WWTR1;WWTR1;WWTR1                | 1.26E-05          | 1.26E-05             | 15.2164            | 15.2164                      | T up vs N                              | 38.507  | 69.4157   | 28.8428    | 1         |
| cg21400802  | PGLYRP4                          | 9.28E-05          | 9.28E-05             | 0.273663           | -3.65413                     | T down vs N                            | 26.743  | 15.7281   | 9.4099     | 1         |
| cg21404980  | ZC3H3                            | 9.39E-05          | 9.39E-05             | 0.317454           | -3.15006                     | T down vs N                            | 26.68   | 12.3313   | 7.39509    | 1         |
| cg21408061  | SSR2                             | 0.0001373         | 0.000137302          | 0.159042           | -6.28763                     | T down vs N                            | 24.763  | 31.6613   | 20.4574    | 1         |
| cg21410633  | CAP1;CAP1                        | 0.00130448        | 0.00130448           | 0.267972           | -3.73173                     | T down vs N                            | 15.122  | 16.2423   | 17.1855    | 1         |
| cg21410980  | N4BP2                            | 0.00048012        | 0.000480116          | 0.23509            | -4.25369                     | T down vs N                            | 19.061  | 19.6323   | 16.4798    | 1         |
|             | GHRL;GHRL;GHRL;GHRL;GHRL;G       |                   |                      |                    |                              |                                        |         |           |            |           |
|             | HRL;GHRLOS;GHRLOS;GHRLOS;GHRLOS; |                   |                      |                    |                              |                                        |         |           |            |           |
| cg21411674  | GHRL;GHRL;GHRL;GHRL;GHRLOS       | 0.00044878        | 0.00044878           | 0.328657           | -3.04269                     | T down vs N                            | 19.345  | 11.5971   | 9.5916     | 1         |
| cg21414251  | OR12D2                           | 3.33E-05          | 3.33E-05             | 0.263851           | -3.79001                     | T down vs N                            | 32.413  | 16.6269   | 8.20757    | 1         |
| cg21415227  | SPON1                            | 4.06E-05          | 4.06E-05             | 4.71671            | 4.71671                      | T up vs N                              | 31.26   | 22.5345   | 11.5341    | 1         |
| cg21419383  | IVL                              | 0.00078264        | 0.000782644          | 0.216347           | -4.6222                      | T down vs N                            | 17.072  | 21.9502   | 20.5724    | 1         |
| cg21422742  | OVOL2                            | 0.00102505        | 0.00102505           | 0.300394           | -3.32896                     | T down vs N                            | 16.026  | 13.5471   | 13.5253    | 1         |
| cg21424595  | LOC646762                        | 2.43E-05          | 2.43E-05             | 0.218295           | -4.58095                     | T down vs N                            | 34.304  | 21.6939   | 10.1184    | 1         |
| cg21425842  | HIST1H4F                         | 0.00203402        | 0.00203402           | 8.05871            | 8.05871                      | T up vs N                              | 13.529  | 40.7853   | 48.2348    | 1         |
| cg21429725  | PIGZ                             | 2.09E-05          | 2.09E-05             | 8.74205            | 8.74205                      | T up vs N                              | 35.242  | 44.0289   | 19.9893    | 1         |
| cg21429780  | MAML3                            | 0.00142881        | 0.00142881           | 0.301288           | -3.31908                     | T down vs N                            | 14.788  | 13.4802   | 14.5852    | 1         |
| cg21433558  | CNTNAP1                          | 0.00101048        | 0.00101048           | 4.18941            | 4.18941                      | T up vs N                              | 16.08   | 19.2215   | 19.1254    | 1         |
| cg21439763  | TNFSF4;TNFSF4                    | 0.00121117        | 0.00121117           | 0.281506           | -3.55232                     | T down vs N                            | 15.397  | 15.0497   | 15.6389    | 1         |
| cg21444731  | RGL4;LOC91316;RGL4               | 3.26E-05          | 3.26E-05             | 0.326199           | -3.06562                     | T down vs N                            | 32.529  | 11.7541   | 5.78142    | 1         |
| cg21445764  | C3orf26;FILIP1L;FILIP1L          | 8.26E-07          | 8.26E-07             | 0.305202           | -3.27652                     | T down vs N                            | 60.169  | 13.1918   | 3.50792    | 1         |
| cg21446725  | DNAJC22                          | 0.00503773        | 0.00503773           | 5.40371            | 5.40371                      | T up vs N                              | 10.552  | 26.6585   | 40.4215    | 1         |
| cg21450529  | PREB                             | 4.45E-05          | 4.45E-05             | 0.259426           | -3.85466                     | T down vs N                            | 30.732  | 17.0517   | 8.87767    | 1         |
| cg21450888  | DNM3;DNM3;MIR199A2               | 0.00050625        | 0.000506251          | 0.31613            | -3.16325                     | T down vs N                            | 18.839  | 12.4213   | 10.5495    | 1         |
| cg21451869  | MMP9                             | 1.95E-06          | 1.95E-06             | 0.201086           | -4.97299                     | T down vs N                            | 52.514  | 24.0981   | 7.34218    | 1         |
| cg21453451  | SOX2OT                           | 4.20E-05          | 4.20E-05             | 9.95878            | 9.95878                      | T up vs N                              | 31.059  | 49.4804   | 25.4897    | 1         |
| cg21456301  | MIR520G                          | 0.00021437        | 0.000214372          | 0.309548           | -3.23052                     | T down vs N                            | 22.628  | 12.8793   | 9.10672    | 1         |
| cg21459460  | WRB;WRB                          | 0.00060436        | 0.000604358          | 7.02492            | 7.02492                      | T up vs N                              | 18.108  | 35.5953   | 31.451     | 1         |
| cg21459850  | CLDN14;CLDN14                    | 0.00336549        | 0.00336549           | 0.251723           | -3.97262                     | T down vs N                            | 11.832  | 17.8221   | 24.1002    | 1         |
| cg21471580  | PIWIL2;PIWIL2;PIWIL2             | 0.00011202        | 0.000112022          | 5.40365            | 5.40365                      | T up vs N                              | 25.779  | 26.6582   | 16.5459    | 1         |
| cg21472506  | OTX1                             | 0.00570532        | 0.00570532           | 0.141763           | -7.05402                     | T down vs N                            | 10.171  | 35.7464   | 56.2314    | 1         |
| cg21474053  | MTOR                             | 0.00060399        | 0.000603988          | 3.2561             | 3.2561                       | T up vs N                              | 18.111  | 13.0531   | 11.5318    | 1         |
| cg21475065  | CNTNAP2                          | 0.0039825         | 0.0039825            | 0.28884            | -3.46212                     | T down vs N                            | 11.29   | 14.4451   | 20.4723    | 1         |
| cg21476599  | ANO2                             | 0.00033511        | 0.00033511           | 0.264996           | -3.77364                     | T down vs N                            | 20.606  | 16.519    | 12.8264    | 1         |
| cg21478137  | CYP19A1;CYP19A1                  | 2.49E-05          | 2.49E-05             | 0.333332           | -3.00001                     | T down vs N                            | 34.167  | 11.3045   | 5.29382    | 1         |
| cg21479786  | KRT33A                           | 5.87E-05          | 5.87E-05             | 0.201358           | -4.96628                     | T down vs N                            | 29.182  | 24.0575   | 13.1901    | 1         |
| cg21480264  | POLN                             | 0.00397939        | 0.00397939           | 0.274091           | -3.64842                     | T down vs N                            | 11.292  | 15.6902   | 22.2319    | 1         |
| cg21485906  | SLC7A5P1                         | 0.00333491        | 0.00333491           | 4.2213             | 4.2213                       | T up vs N                              | 11.862  | 19.4255   | 26.2025    | 1         |
| cg21490980  | PAH;PAH                          | 0.00045701        | 0.000457007          | 4.57127            | 4.57127                      | T up vs N                              | 19.269  | 21.6336   | 17.9639    | 1         |
| cg21491201  | GGCT                             | 0.00013322        | 0.000133216          | 0.255772           | -3.90974                     | T down vs N                            | 24.912  | 17.4122   | 11.1832    | 1         |
| cg21491308  | TEX101;TEX101                    | 2.50E-05          | 2.50E-05             | 0.160568           | -6.22791                     | T down vs N                            | 34.128  | 31.3335   | 14.6899    | 1         |
| cg21491340  | KCNN1                            | 0.00016585        | 0.000165852          | 0.154234           | -6.48365                     | T down vs N                            | 23.843  | 32.7275   | 21.9621    | 1         |
| cg21491405  | C14orf133                        | 0.00017911        | 0.000179107          | 0.233947           | -4.27447                     | T down vs N                            | 23.475  | 19.7647   | 13.4712    | 1         |

| Probeset ID | UCSC_REFGENE_NAME                                                                               | p-value<br>(Type) | p-value (T vs.<br>N) | Ratio (T<br>vs. N) | Fold-<br>Change (T<br>vs. N) | Fold-Change (T vs.<br>N) (Description) | F(Type) | SS (Type) | SS (Error) | F (Error) |
|-------------|-------------------------------------------------------------------------------------------------|-------------------|----------------------|--------------------|------------------------------|----------------------------------------|---------|-----------|------------|-----------|
| cg21494367  | EPAS1                                                                                           | 6.01E-05          | 6.01E-05             | 0.321457           | -3.11084                     | T down vs N                            | 29.06   | 12.0634   | 6.64206    | 1         |
| cg21499610  | GMD5                                                                                            | 0.00013231        | 0.000132312          | 0.282702           | -3.53729                     | T down vs N                            | 24.946  | 14.9492   | 9.58831    | 1         |
| cg21500126  | SAMD12                                                                                          | 1.52E-05          | 1.52E-05             | 0.174455           | -5.73215                     | T down vs N                            | 37.291  | 28.5558   | 12.2522    | 1         |
| cg21500300  | BCAT1                                                                                           | 8.14E-07          | 8.14E-07             | 0.316779           | -3.15678                     | T down vs N                            | 60.308  | 12.3771   | 3.28371    | 1         |
| cg21500354  | DNHD1;DNHD1                                                                                     | 8.07E-06          | 8.07E-06             | 3.05502            | 3.05502                      | T up vs N                              | 41.56   | 11.6816   | 4.49722    | 1         |
| cg21502250  | HPD                                                                                             | 2.57E-05          | 2.57E-05             | 0.22281            | -4.48813                     | T down vs N                            | 33.964  | 21.1142   | 9.94662    | 1         |
| cg21502466  | GPR133;GPR133                                                                                   | 0.00013347        | 0.000133473          | 0.32245            | -3.10126                     | T down vs N                            | 24.902  | 11.9979   | 7.70878    | 1         |
| cg21502927  | GPR4                                                                                            | 0.00284058        | 0.00284058           | 0.293604           | -3.40595                     | T down vs N                            | 12.391  | 14.0671   | 18.1645    | 1         |
| cg21504505  | C4orf6                                                                                          | 0.00167838        | 0.00167838           | 0.301715           | -3.31438                     | T down vs N                            | 14.207  | 13.4485   | 15.1459    | 1         |
| cg21504925  | LDB2;LDB2                                                                                       | 0.00038906        | 0.000389057          | 0.328387           | -3.04519                     | T down vs N                            | 19.956  | 11.6142   | 9.31185    | 1         |
| cg21505886  | TMEM129;TACC3;TMEM129                                                                           | 0.00011432        | 0.000114322          | 0.313731           | -3.18744                     | T down vs N                            | 25.676  | 12.5862   | 7.84307    | 1         |
| cg21506509  | MN1                                                                                             | 0.00012368        | 0.000123675          | 5.44372            | 5.44372                      | T up vs N                              | 25.281  | 26.8921   | 17.0195    | 1         |
| cg21506790  | HBG2                                                                                            | 0.00732446        | 0.00732446           | 0.2286             | -4.37445                     | T down vs N                            | 9.4255  | 20.3988   | 34.6277    | 1         |
| cg21506819  | CACNA2D3                                                                                        | 0.00021323        | 0.000213232          | 0.205695           | -4.86157                     | T down vs N                            | 22.653  | 23.422    | 16.5431    | 1         |
| cg21507078  | SIL1;SIL1                                                                                       | 7.90E-06          | 7.90E-06             | 0.255378           | -3.91576                     | T down vs N                            | 44.063  | 16.425    | 5.59147    | 1         |
| cg21507095  | TBX1;TBX1;TBX1                                                                                  | 0.00056954        | 0.000569543          | 6.95038            | 6.95038                      | T up vs N                              | 18.351  | 35.2068   | 30.696     | 1         |
| cg21513352  | TGOLN2                                                                                          | 4.66E-06          | 4.66E-06             | 0.188327           | -5.30991                     | T down vs N                            | 48.29   | 24.5722   | 7.63271    | 1         |
| cg21515023  | TERT;TERT                                                                                       | 6.06E-05          | 6.06E-05             | 0.182471           | -5.48033                     | T down vs N                            | 29.013  | 27.1053   | 14.948     | 1         |
| cg21516287  | ACTR3C;LRRC61;LRRC61                                                                            | 0.00020897        | 0.000208973          | 7.21251            | 7.21251                      | T up vs N                              | 22.747  | 36.5641   | 25.7185    | 1         |
| cg21518279  | SLC4A7                                                                                          | 0.0015288         | 0.0015288            | 0.312992           | -3.19497                     | T down vs N                            | 14.542  | 12.6374   | 13.9042    | 1         |
| cg21519787  | SPHK2                                                                                           | 0.00147893        | 0.00147893           | 4.83678            | 4.83678                      | T up vs N                              | 14.662  | 23.2708   | 25.3937    | 1         |
| cg21519900  | C20orf186                                                                                       | 5.64E-05          | 5.64E-05             | 0.251752           | -3.97216                     | T down vs N                            | 29.401  | 17.8191   | 9.69702    | 1         |
| cg21527621  | ACOT11;ACOT11                                                                                   | 0.00053313        | 0.000533129          | 0.276936           | -3.61095                     | T down vs N                            | 18.624  | 15.4409   | 13.2655    | 1         |
| cg21529429  | SH3BP5                                                                                          | 0.00422911        | 0.00422911           | 0.305999           | -3.06749                     | T down vs N                            | 11.099  | 11.767    | 16.9632    | 1         |
| cg21531126  | LRFN2                                                                                           | 2.96E-05          | 2.96E-05             | 0.30146            | -3.31719                     | T down vs N                            | 33.113  | 13.4675   | 6.50731    | 1         |
| cg21531657  | TMEM111                                                                                         | 0.00054814        | 0.000548138          | 0.326353           | -3.06417                     | T down vs N                            | 18.509  | 11.7442   | 10.1522    | 1         |
| cg21531908  | SH3RF3                                                                                          | 0.00076048        | 0.000760477          | 0.231196           | -4.32534                     | T down vs N                            | 17.185  | 20.0879   | 18.7026    | 1         |
| cg21536086  | MIR190B                                                                                         | 0.0006184         | 0.000618398          | 0.231997           | -4.31041                     | T down vs N                            | 18.015  | 19.9931   | 17.7571    | 1         |
| cg21537187  | MTPN;LUZP6                                                                                      | 0.00020403        | 0.000204027          | 0.205057           | -4.8767                      | T down vs N                            | 22.859  | 23.5141   | 16.4583    | 1         |
| cg21538216  | PARVG;PARVG;PARVG;PARVG;PARVG;                                                                  | 2.42E-06          | 2.42E-06             | 0.328019           | -3.0486                      | T down vs N                            | 50.712  | 11.6376   | 3.67177    | 1         |
| cg21538684  | PHACTR1                                                                                         | 5.29E-06          | 5.29E-06             | 0.178765           | -5.59394                     | T down vs N                            | 44.623  | 27.7631   | 9.95478    | 1         |
| cg21539229  | FBXW12;FBXW12;FBXW12                                                                            | 1.96E-05          | 1.96E-05             | 0.251451           | -3.97692                     | T down vs N                            | 35.633  | 17.8501   | 8.01518    | 1         |
| cg21540035  | ZKSCAN1                                                                                         | 5.98E-06          | 5.98E-06             | 0.286267           | -3.49325                     | T down vs N                            | 43.712  | 14.6541   | 5.36387    | 1         |
| cg21541083  | STXBP2;STXBP2                                                                                   | 7.29E-06          | 7.29E-06             | 0.239134           | -4.18175                     | T down vs N                            | 42.284  | 19.1724   | 7.25471    | 1         |
| cg21541477  | FGF7;C15orf33                                                                                   | 0.00061147        | 0.000611473          | 0.305924           | -3.26879                     | T down vs N                            | 18.061  | 13.1393   | 11.6402    | 1         |
| cg21542643  | CYP3A43;CYP3A43;CYP3A43                                                                         | 2.25E-06          | 2.25E-06             | 0.175327           | -5.70363                     | T down vs N                            | 51.337  | 28.3929   | 8.84911    | 1         |
| cg21543102  | SPRR3;SPRR3                                                                                     | 0.0013315         | 0.0013315            | 0.318586           | -3.13887                     | T down vs N                            | 15.046  | 12.2549   | 13.0316    | 1         |
| cg21544698  | RIMBP2                                                                                          | 0.00152078        | 0.00152078           | 0.196123           | -5.09884                     | T down vs N                            | 14.561  | 24.8548   | 27.3106    | 1         |
| cg21544931  | PRR5L;PRR5L;PRR5L;PRR5L                                                                         | 1.73E-06          | 1.73E-06             | 0.309568           | -3.23031                     | T down vs N                            | 53.522  | 12.8779   | 3.84973    | 1         |
| cg21548955  | PCDHGA4;PCDHGA6;PCDHGA9;PCDHGA1;<br>PCDHGA8;PCDHGA5;PCDHGB1;PCDHGA10;<br>PCDHGB4;PCDHGA3;PCDHGA | 0.0004037         | 0.000403698          | 3.59536            | 3.59536                      | T up vs N                              | 19.797  | 15.337    | 12.3954    | 1         |
| cg21550812  | SIGLEC14                                                                                        | 7.33E-05          | 7.33E-05             | 0.226487           | -4.41526                     | T down vs N                            | 27.981  | 20.6563   | 11.8117    | 1         |
| cg21553145  | C8ORFK29                                                                                        | 0.00022424        | 0.000224243          | 4.47628            | 4.47628                      | T up vs N                              | 22.419  | 21.0399   | 15.0156    | 1         |
| cg21554552  | RASSF1;RASSF1                                                                                   | 3.13E-06          | 3.13E-06             | 5.36148            | 5.36148                      | T up vs N                              | 48.65   | 26.4111   | 8.68619    | 1         |
| cg21557108  | ATP8B4                                                                                          | 3.69E-05          | 3.69E-05             | 0.108223           | -9.24014                     | T down vs N                            | 31.806  | 46.3082   | 23.2957    | 1         |
| cg21557724  | TSSC1                                                                                           | 0.00092468        | 0.000924675          | 0.247597           | -4.03882                     | T down vs N                            | 16.421  | 18.2517   | 17.7838    | 1         |
| cg21564965  | ARHGAP23                                                                                        | 0.00170042        | 0.00170042           | 5.13249            | 5.13249                      | T up vs N                              | 14.16   | 25.0559   | 28.3113    | 1         |
| cg21568206  | EPB41L5                                                                                         | 2.88E-05          | 2.88E-05             | 0.211079           | -4.73757                     | T down vs N                            | 33.279  | 22.6629   | 10.8959    | 1         |
| cg21569714  | GALNT10;GALNT10                                                                                 | 5.97E-05          | 5.97E-05             | 0.081254           | -12.3071                     | T down vs N                            | 29.093  | 59.016    | 32.456     | 1         |
| cg21570611  | OR8U8;OR5M3                                                                                     | 0.00242598        | 0.00242598           | 0.289786           | -3.45082                     | T down vs N                            | 12.922  | 14.3692   | 17.7916    | 1         |
| cg21570811  | RGS12;RGS12                                                                                     | 6.59E-05          | 6.59E-05             | 0.262507           | -3.80943                     | T down vs N                            | 28.557  | 16.7546   | 9.38741    | 1         |
| cg21572000  | DCAF5                                                                                           | 0.00027992        | 0.000279915          | 0.263174           | -3.79977                     | T down vs N                            | 21.407  | 16.6911   | 12.4752    | 1         |
| cg21574064  | ADAMTS10                                                                                        | 5.82E-05          | 5.82E-05             | 0.236061           | -4.23618                     | T down vs N                            | 29.229  | 19.5206   | 10.6857    | 1         |
| cg21577007  | ATP8B1                                                                                          | 0.00043596        | 0.000435961          | 3.2754             | 3.2754                       | T up vs N                              | 19.468  | 13.1842   | 10.8353    | 1         |
| cg21577472  | LFNG;LFNG;LFNG;LFNG                                                                             | 0.00117639        | 0.00117639           | 0.174099           | -5.74385                     | T down vs N                            | 15.506  | 28.6226   | 29.5345    | 1         |
| cg21577836  | TNR                                                                                             | 2.31E-06          | 2.31E-06             | 28.5235            | 28.5235                      | T up vs N                              | 51.126  | 105.158   | 32.9094    | 1         |
| cg21577889  | HOOK1                                                                                           | 0.00021301        | 0.000213009          | 3.97192            | 3.97192                      | T up vs N                              | 22.658  | 17.8175   | 12.5819    | 1         |
| cg21578207  | RNF220                                                                                          | 2.70E-05          | 2.70E-05             | 0.267769           | -3.73456                     | T down vs N                            | 33.669  | 16.261    | 7.72755    | 1         |
| cg21580428  | PCDHGA4;PCDHGA6;PCDHGA9;PCDHGA1;<br>PCDHGA8;PCDHGA5;PCDHGB1;PCDHGA10;<br>PCDHGB4;PCDHGA3;PCDHGA | 0.00019358        | 0.000193581          | 4.24264            | 4.24264                      | T up vs N                              | 23.106  | 19.5618   | 13.5456    | 1         |
| cg21583668  | MON1A;MON1A                                                                                     | 1.97E-05          | 1.97E-05             | 0.297362           | -3.3629                      | T down vs N                            | 35.602  | 13.7766   | 6.19147    | 1         |
| cg21586613  | GFM1                                                                                            | 0.00078955        | 0.000789554          | 0.283241           | -3.53057                     | T down vs N                            | 17.037  | 14.9042   | 13.997     | 1         |
| cg21587372  | SNRNP70                                                                                         | 0.00117704        | 0.00117704           | 0.327334           | -3.05498                     | T down vs N                            | 15.504  | 11.6813   | 12.0551    | 1         |
| cg21589858  | C3orf26;FILIP1L;FILIP1L;FILIP1L;MIR548G                                                         | 0.00151608        | 0.00151608           | 0.307008           | -3.25725                     | T down vs N                            | 14.573  | 13.061    | 14.3404    | 1         |
| cg21590238  | C12orf43                                                                                        | 0.003769          | 0.003769             | 0.315733           | -3.16723                     | T down vs N                            | 11.466  | 12.4484   | 17.3712    | 1         |
| cg21591807  | FGF21;FUT1                                                                                      | 8.08E-05          | 8.08E-05             | 0.314486           | -3.17979                     | T down vs N                            | 27.466  | 12.534    | 7.30153    | 1         |

| Probeset ID | UCSC_REFGENE_NAME                                                                               | p-value<br>(Type) | p-value (T vs.<br>N) | Ratio (T<br>vs. N) | Fold-<br>Change (T<br>vs. N) | Fold-Change (T vs.<br>N) (Description) | F(Type) | SS (Type) | SS (Error) | F (Error) |
|-------------|-------------------------------------------------------------------------------------------------|-------------------|----------------------|--------------------|------------------------------|----------------------------------------|---------|-----------|------------|-----------|
| cg21592241  | KCNQ1;KCNQ1                                                                                     | 0.00014278        | 0.000142779          | 0.101447           | -9.85739                     | T down vs N                            | 24.571  | 49.0408   | 31.9348    | 1         |
| cg21592803  | MIR525                                                                                          | 0.00145782        | 0.00145782           | 0.213074           | -4.69321                     | T down vs N                            | 14.715  | 22.3896   | 24.3453    | 1         |
| cg21593015  | STOX2                                                                                           | 0.00068619        | 0.000686186          | 0.325334           | -3.07376                     | T down vs N                            | 17.595  | 11.8099   | 10.7394    | 1         |
| cg21594400  | DOCK4                                                                                           | 5.39E-06          | 5.39E-06             | 3.32445            | 3.32445                      | T up vs N                              | 44.486  | 13.5166   | 4.86139    | 1         |
| cg21594642  | FAM18B2;FAM18B2                                                                                 | 0.00012886        | 0.000128861          | 7.59299            | 7.59299                      | T up vs N                              | 25.077  | 38.4916   | 24.5592    | 1         |
| cg21594839  | OC90                                                                                            | 7.56E-06          | 7.56E-06             | 0.267044           | -3.7447                      | T down vs N                            | 42.025  | 16.3281   | 6.21653    | 1         |
| cg21594961  | IL5RA;IL5RA;IL5RA;IL5RA;IL5RA;IL5RA                                                             | 0.00206769        | 0.00206769           | 0.243394           | -4.10857                     | T down vs N                            | 13.472  | 18.7022   | 22.2119    | 1         |
| cg21595709  | EPHX3;EPHX3                                                                                     | 3.75E-06          | 3.75E-06             | 6.77423            | 6.77423                      | T up vs N                              | 47.23   | 34.2806   | 11.6132    | 1         |
| cg21596858  | DCST1;DCST2;DCST1                                                                               | 0.00043825        | 0.000438248          | 0.216801           | -4.61253                     | T down vs N                            | 19.446  | 21.8902   | 18.0109    | 1         |
| cg21600258  | LEF1;LEF1;LEF1;LOC641518<br>NDUFAF3;NDUFAF3;NDUFAF3;NDUFA                                       | 0.002299          | 0.002299             | 0.245614           | -4.07143                     | T down vs N                            | 13.106  | 18.4626   | 22.5397    | 1         |
| cg21604496  | F3                                                                                              | 0.00186442        | 0.00186442           | 0.329786           | -3.03227                     | T down vs N                            | 13.834  | 11.5258   | 13.3305    | 1         |
| cg21605904  | WDR19                                                                                           | 0.00052893        | 0.000528933          | 0.299863           | -3.33486                     | T down vs N                            | 18.657  | 13.587    | 11.6523    | 1         |
| cg21608237  | ARHGAP8;PRR5-ARHGAP8;ARHGAP8                                                                    | 0.00018229        | 0.000182294          | 11.9081            | 11.9081                      | T up vs N                              | 23.391  | 57.4767   | 39.3157    | 1         |
| cg21610164  | HIST1H2BI                                                                                       | 0.00395062        | 0.00395062           | 3.41545            | 3.41545                      | T up vs N                              | 11.315  | 14.1311   | 19.9819    | 1         |
| cg21611262  | GRXCR2                                                                                          | 2.36E-05          | 2.36E-05             | 0.296944           | -3.36764                     | T down vs N                            | 34.475  | 13.8086   | 6.40864    | 1         |
| cg21613963  | AKAP8                                                                                           | 0.00018995        | 0.000189954          | 0.252785           | -3.95593                     | T down vs N                            | 23.196  | 17.7134   | 12.2184    | 1         |
| cg21614201  | SYNPO2;SYNPO2;SYNPO2                                                                            | 6.72E-06          | 6.72E-06             | 0.297479           | -3.36158                     | T down vs N                            | 42.868  | 13.7677   | 5.13864    | 1         |
| cg21615583  | MIR375                                                                                          | 0.00148483        | 0.00148483           | 20.3198            | 20.3198                      | T up vs N                              | 14.648  | 84.9484   | 92.7893    | 1         |
| cg21616627  | HSPG2                                                                                           | 0.00012632        | 0.000126323          | 0.318778           | -3.13698                     | T down vs N                            | 25.176  | 12.242    | 7.78022    | 1         |
| cg21616683  | OR7D4                                                                                           | 0.00011919        | 0.000119191          | 0.220676           | -4.53153                     | T down vs N                            | 25.466  | 21.3858   | 13.4364    | 1         |
| cg21617516  | CAPN2;CAPN2                                                                                     | 0.00059167        | 0.000591674          | 5.18158            | 5.18158                      | T up vs N                              | 18.195  | 25.3485   | 22.2906    | 1         |
| cg21620107  | DLGAP2                                                                                          | 0.00026816        | 0.000268162          | 0.098709           | -10.1308                     | T down vs N                            | 21.601  | 50.2203   | 37.1993    | 1         |
| cg21620969  | LRDD;LRDD;LRDD                                                                                  | 0.00096676        | 0.000966759          | 0.21081            | -4.74362                     | T down vs N                            | 16.25   | 22.7001   | 22.3513    | 1         |
| cg21621264  | GPR133                                                                                          | 0.00098777        | 0.000987768          | 4.44418            | 4.44418                      | T up vs N                              | 16.167  | 20.8384   | 20.6228    | 1         |
| cg21624282  | C13orf28                                                                                        | 6.32E-05          | 6.32E-05             | 0.221122           | -4.5224                      | T down vs N                            | 28.778  | 21.3287   | 11.8584    | 1         |
| cg21627409  | PCDHGA4;PCDHGA11;PCDHGA11;PCD<br>HGA9;PCDHGA1;PCDHGB1;PCDHGB6;<br>PCDHGA12;PCDHGB3;PCDHGB7;PCDH | 0.00174112        | 0.00174112           | 5.26658            | 5.26658                      | T up vs N                              | 14.076  | 25.8523   | 29.386     | 1         |
| cg21629842  | CGB;CGB                                                                                         | 7.60E-06          | 7.60E-06             | 0.236683           | -4.22506                     | T down vs N                            | 41.985  | 19.4495   | 7.41209    | 1         |
| cg21632014  | PSG11;PSG11;PSG11                                                                               | 2.25E-05          | 2.25E-05             | 0.164256           | -6.08804                     | T down vs N                            | 34.782  | 30.5601   | 14.0577    | 1         |
| cg21633134  | ADCY2                                                                                           | 5.72E-06          | 5.72E-06             | 4.69843            | 4.69843                      | T up vs N                              | 44.036  | 22.4218   | 8.14681    | 1         |
| cg21635265  | B4GALT7                                                                                         | 5.06E-05          | 5.06E-05             | 0.258927           | -3.86209                     | T down vs N                            | 30.01   | 17.1004   | 9.11725    | 1         |
| cg21637653  | FLCN                                                                                            | 0.00036262        | 0.000362622          | 0.320284           | -3.12223                     | T down vs N                            | 20.261  | 12.1412   | 9.58786    | 1         |
| cg21639188  | NUB1                                                                                            | 0.00141411        | 0.00141411           | 0.323302           | -3.09308                     | T down vs N                            | 14.826  | 11.942    | 12.888     | 1         |
| cg21640749  | RAB37;CD300LF                                                                                   | 1.87E-05          | 1.87E-05             | 0.311812           | -3.20706                     | T down vs N                            | 35.954  | 12.7197   | 5.66044    | 1         |
| cg21641458  | HoxA6                                                                                           | 0.00196609        | 0.00196609           | 3.1495             | 3.1495                       | T up vs N                              | 13.648  | 12.3274   | 14.4524    | 1         |
| cg21643128  | TRPM2                                                                                           | 0.00290701        | 0.00290701           | 0.239858           | -4.16914                     | T down vs N                            | 12.314  | 19.0916   | 24.8065    | 1         |
| cg21644009  | GPX5;GPX5                                                                                       | 0.00131889        | 0.00131889           | 0.266845           | -3.74749                     | T down vs N                            | 15.081  | 16.3465   | 17.3421    | 1         |
| cg21644316  | QTRTD1                                                                                          | 4.03E-06          | 4.03E-06             | 0.183908           | -5.43749                     | T down vs N                            | 46.677  | 26.8558   | 9.20564    | 1         |
| cg21645973  | ARHGEF10L;ARHGEF10L                                                                             | 0.00549331        | 0.00549331           | 0.311876           | -3.20641                     | T down vs N                            | 10.287  | 12.7153   | 19.7778    | 1         |
| cg21647189  | PROM1;PROM1                                                                                     | 0.00033104        | 0.00033104           | 0.324852           | -3.07832                     | T down vs N                            | 20.66   | 11.8411   | 9.17021    | 1         |
| cg21648069  | ERC1;ERC1;ERC1;ERC1;ERC1                                                                        | 0.00417296        | 0.00417296           | 0.18972            | -5.27093                     | T down vs N                            | 11.141  | 25.8781   | 37.164     | 1         |
| cg21648202  | PALM3                                                                                           | 0.00020922        | 0.000209215          | 0.233567           | -4.28143                     | T down vs N                            | 22.742  | 19.809    | 13.9366    | 1         |
| cg21649629  | DNAJC5B                                                                                         | 0.00060412        | 0.00060412           | 0.278743           | -3.58754                     | T down vs N                            | 18.11   | 15.2848   | 13.504     | 1         |
| cg21655480  | KLHL34                                                                                          | 0.00129335        | 0.00129335           | 6.56809            | 6.56809                      | T up vs N                              | 15.154  | 33.1821   | 35.0355    | 1         |
| cg21656685  | LPIN2;LOC727896                                                                                 | 3.12E-05          | 3.12E-05             | 0.317927           | -3.14538                     | T down vs N                            | 32.794  | 12.2993   | 6.00075    | 1         |
| cg21659949  | PPIL2;PPIL2;PPIL2                                                                               | 0.00227655        | 0.00227655           | 0.301767           | -3.31381                     | T down vs N                            | 13.14   | 13.4446   | 16.3715    | 1         |
| cg21660452  | NRXN2;NRXN2;NRXN2                                                                               | 0.00330902        | 0.00330902           | 3.67552            | 3.67552                      | T up vs N                              | 11.887  | 15.8701   | 21.3609    | 1         |
| cg21667061  | NARG2;NARG2                                                                                     | 0.00016524        | 0.000165238          | 0.244656           | -4.08738                     | T down vs N                            | 23.861  | 18.5655   | 12.4493    | 1         |
| cg21672468  | NIPA2;NIPA2;NIPA2;NIPA2                                                                         | 0.00034247        | 0.000342467          | 0.309423           | -3.23183                     | T down vs N                            | 20.511  | 12.8882   | 10.0537    | 1         |
| cg21679730  | CACHD1                                                                                          | 0.00057898        | 0.000578983          | 3.55921            | 3.55921                      | T up vs N                              | 18.284  | 15.0957   | 13.2102    | 1         |
| cg21680327  | PSMB2                                                                                           | 1.64E-05          | 1.64E-05             | 0.270192           | -3.70107                     | T down vs N                            | 36.773  | 16.0395   | 6.9788     | 1         |
| cg21680719  | FHL3                                                                                            | 0.00011779        | 0.000117793          | 0.245362           | -4.07561                     | T down vs N                            | 25.525  | 18.4896   | 11.5897    | 1         |
| cg21683105  | OBSCN;OBSCN                                                                                     | 0.00093255        | 0.000932552          | 0.308073           | -3.24598                     | T down vs N                            | 16.388  | 12.9844   | 12.6768    | 1         |
| cg21684179  | FAM40A                                                                                          | 0.00109656        | 0.00109656           | 0.294815           | -3.39196                     | T down vs N                            | 15.77   | 13.9728   | 14.1765    | 1         |
| cg21686600  | C1orf201                                                                                        | 0.00310841        | 0.00310841           | 0.313803           | -3.18671                     | T down vs N                            | 12.092  | 12.5812   | 16.6468    | 1         |
| cg21688152  | B3GNTL1                                                                                         | 1.07E-05          | 1.07E-05             | 0.294404           | -3.3967                      | T down vs N                            | 39.625  | 14.0047   | 5.65496    | 1         |
| cg21691367  | MTHFD1L                                                                                         | 0.00290992        | 0.00290992           | 0.327095           | -3.05722                     | T down vs N                            | 12.311  | 11.6966   | 15.202     | 1         |
| cg21691717  | PGLYRP4                                                                                         | 3.47E-05          | 3.47E-05             | 0.222905           | -4.48622                     | T down vs N                            | 32.161  | 21.1022   | 10.4983    | 1         |
| cg21693965  | CENPF                                                                                           | 0.00027373        | 0.000273729          | 0.273689           | -3.65378                     | T down vs N                            | 21.508  | 15.7258   | 11.6987    | 1         |
| cg21694350  | RAP1GAP;RAP1GAP;RAP1GAP                                                                         | 3.20E-05          | 3.20E-05             | 8.34034            | 8.34034                      | T up vs N                              | 32.64   | 42.1391   | 20.6562    | 1         |
| cg21695485  | RHOD                                                                                            | 2.93E-06          | 2.93E-06             | 20.6068            | 20.6068                      | T up vs N                              | 49.168  | 85.7414   | 27.9015    | 1         |
| cg21695830  | RBMXL1;RBMXL1;CCBL2;CCBL2                                                                       | 6.39E-05          | 6.39E-05             | 0.168878           | -5.92142                     | T down vs N                            | 28.718  | 29.6283   | 16.5074    | 1         |
| cg21696012  | HMGCL;HMGCL                                                                                     | 0.00018374        | 0.000183741          | 0.273385           | -3.65785                     | T down vs N                            | 23.353  | 15.7528   | 10.7927    | 1         |
| cg21696975  | S100A7A                                                                                         | 0.00010571        | 0.000105709          | 0.173611           | -5.76001                     | T down vs N                            | 26.073  | 28.7147   | 17.6211    | 1         |
| cg21697134  | FN3K                                                                                            | 7.25E-06          | 7.25E-06             | 4.01133            | 4.01133                      | T up vs N                              | 42.32   | 18.0735   | 6.83317    | 1         |
| cg21698310  | PPP1R9B                                                                                         | 0.00444705        | 0.00444705           | 0.293241           | -3.41017                     | T down vs N                            | 10.941  | 14.0956   | 20.614     | 1         |
| cg21698879  | HLA-DRB5                                                                                        | 0.00019224        | 0.00019224           | 0.281512           | -3.55224                     | T down vs N                            | 23.139  | 15.0491   | 10.406     | 1         |

| Probeset ID                     | UCSC_REFGENE_NAME       | p-value<br>(Type) | p-value (T vs.<br>N) | Ratio (T<br>vs. N) | Fold-<br>Change (T<br>vs. N) | Fold-Change (T vs.<br>N) (Description) | F(Type) | SS (Type) | SS (Error) | F (Error) |
|---------------------------------|-------------------------|-------------------|----------------------|--------------------|------------------------------|----------------------------------------|---------|-----------|------------|-----------|
| cg21700339                      | FAM104A;FAM104A         | 0.00323769        | 0.00323769           | 0.304344           | -3.28576                     | T down vs N                            | 12.235  | 12.4748   | 15.2939    | 1         |
| cg21702934                      | CD7                     | 1.97E-06          | 1.97E-06             | 0.213756           | -4.67823                     | T down vs N                            | 55.871  | 20.9855   | 5.63408    | 1         |
| cg21706038                      | TSSC1                   | 5.57E-05          | 5.57E-05             | 0.309352           | -3.23256                     | T down vs N                            | 29.475  | 12.8932   | 6.99877    | 1         |
| cg21712805                      | TDRKH;TDRKH;TDRKH;TDRKH | 1.58E-06          | 1.58E-06             | 0.088772           | -11.2648                     | T down vs N                            | 54.322  | 54.9285   | 16.1786    | 1         |
| cg21713614                      | FRAS1;FRAS1             | 0.00263543        | 0.00263543           | 0.331505           | -3.01654                     | T down vs N                            | 12.642  | 11.4179   | 14.4509    | 1         |
| cg21717508                      | SNX15;SNX15             | 0.00083931        | 0.000839309          | 0.308925           | -3.23703                     | T down vs N                            | 16.797  | 12.9236   | 12.3103    | 1         |
| cg21718276                      | JAK3                    | 0.0009128         | 0.000912797          | 0.197338           | -5.06746                     | T down vs N                            | 16.471  | 24.6668   | 23.9616    | 1         |
| cg21721022                      | OR10C1                  | 1.44E-05          | 1.44E-05             | 0.322216           | -3.10351                     | T down vs N                            | 37.61   | 12.0133   | 5.11065    | 1         |
| cg21721825                      | NEDD1;NEDD1;NEDD1;NEDD1 | 2.11E-05          | 2.11E-05             | 0.126805           | -7.88614                     | T down vs N                            | 35.177  | 39.9435   | 18.168     | 1         |
| cg21722795                      | PCDHGA1;PCDHGA1         | 0.00352983        | 0.00352983           | 3.28675            | 3.28675                      | T up vs N                              | 11.677  | 13.2612   | 18.1705    | 1         |
| cg21723245                      | HLA-J;NCRNA00171        | 3.41E-06          | 3.41E-06             | 0.238607           | -4.19098                     | T down vs N                            | 50.934  | 18.1003   | 5.33055    | 1         |
| cg21723689                      | GALNT9                  | 5.88E-05          | 5.88E-05             | 0.128439           | -7.78581                     | T down vs N                            | 29.171  | 39.4498   | 21.6378    | 1         |
| cg21725701                      | BRSK1                   | 0.00038818        | 0.000388181          | 3.28834            | 3.28834                      | T up vs N                              | 19.966  | 13.272    | 10.6358    | 1         |
| cg21727359                      | FAM46A                  | 0.00502811        | 0.00502811           | 0.323156           | -3.09448                     | T down vs N                            | 10.558  | 11.9516   | 18.1117    | 1         |
| cg21730821                      | ARMCX4                  | 0.0002027         | 0.000202699          | 0.280059           | -3.57068                     | T down vs N                            | 22.89   | 15.1723   | 10.6054    | 1         |
| cg21736592                      | CYTH4                   | 3.10E-05          | 3.10E-05             | 0.297806           | -3.35789                     | T down vs N                            | 32.827  | 13.7428   | 6.69835    | 1         |
| cg21741223                      | TERT;TERT               | 2.01E-05          | 2.01E-05             | 0.175212           | -5.70737                     | T down vs N                            | 35.498  | 28.4143   | 12.8071    | 1         |
| cg21745595                      | TTL6                    | 3.55E-05          | 3.55E-05             | 0.236464           | -4.22898                     | T down vs N                            | 32.03   | 19.4746   | 9.72812    | 1         |
| cg21745599                      | CYP4F3                  | 1.18E-05          | 1.18E-05             | 0.328739           | -3.04192                     | T down vs N                            | 38.937  | 11.5919   | 4.76329    | 1         |
| cg21746339                      | ODZ3                    | 6.12E-05          | 6.12E-05             | 0.244278           | -4.09369                     | T down vs N                            | 28.96   | 18.6063   | 10.2795    | 1         |
| cg21747496                      | RAB7A                   | 6.29E-06          | 6.29E-06             | 0.327744           | -3.05117                     | T down vs N                            | 43.345  | 11.6552   | 4.30231    | 1         |
| cg21748523                      | SLC05A1;SLC05A1;SLC05A1 | 0.0055411         | 0.0055411            | 0.22894            | -4.36796                     | T down vs N                            | 10.26   | 20.3578   | 31.7469    | 1         |
| cg21748578                      | PDCD6                   | 0.00359561        | 0.00359561           | 3.58014            | 3.58014                      | T up vs N                              | 11.617  | 15.2355   | 20.9829    | 1         |
| cg21748751                      | PPARD;PPARD             | 1.13E-05          | 1.13E-05             | 0.205729           | -4.86076                     | T down vs N                            | 41.346  | 22.0396   | 7.9958     | 1         |
| cg21754343                      | LCE2B                   | 0.00016526        | 0.000165258          | 0.201286           | -4.96805                     | T down vs N                            | 23.86   | 24.0682   | 16.1395    | 1         |
| cg21755725                      | MYH14;MYH14;MYH14       | 0.00034169        | 0.000341685          | 3.14221            | 3.14221                      | T up vs N                              | 20.521  | 12.2777   | 9.5728     | 1         |
| cg21757212                      | AUTS2;AUTS2             | 6.84E-05          | 6.84E-05             | 0.274464           | -3.64346                     | T down vs N                            | 28.349  | 15.6572   | 8.8367     | 1         |
| cg21757436                      | ATP11C;ATP11C           | 0.0005289         | 0.000528899          | 0.323191           | -3.09414                     | T down vs N                            | 18.657  | 11.9493   | 10.2477    | 1         |
| cg21758446                      | TSPAN8                  | 3.02E-05          | 3.02E-05             | 0.271561           | -3.68242                     | T down vs N                            | 32.997  | 15.9158   | 7.71745    | 1         |
| cg21760990                      | C6orf170                | 1.97E-06          | 1.97E-06             | 0.073073           | -13.685                      | T down vs N                            | 52.424  | 64.1117   | 19.5673    | 1         |
| cg21761922                      | OXNAD1                  | 0.00016879        | 0.000168786          | 0.273997           | -3.64967                     | T down vs N                            | 23.759  | 15.6985   | 10.572     | 1         |
| cg21762523                      | NR2E1                   | 7.17E-06          | 7.17E-06             | 0.041967           | -23.8285                     | T down vs N                            | 42.397  | 94.1719   | 35.5395    | 1         |
| cg21763058                      | DNAJC22                 | 0.00368313        | 0.00368313           | 3.33766            | 3.33766                      | T up vs N                              | 11.54   | 13.606    | 18.8647    | 1         |
| cg21764190                      | PAX6                    | 3.04E-05          | 3.04E-05             | 27.4596            | 27.4596                      | T up vs N                              | 32.956  | 102.785   | 49.9013    | 1         |
| cg21764358                      | GRLF1                   | 2.49E-05          | 2.49E-05             | 0.296537           | -3.37226                     | T down vs N                            | 34.167  | 13.8398   | 6.481      | 1         |
| cg21768539                      | COL23A1                 | 4.66E-05          | 4.66E-05             | 0.282859           | -3.53533                     | T down vs N                            | 30.465  | 14.936    | 7.84423    | 1         |
| cg21770330                      | NRGN;NRGN               | 0.00012093        | 0.000120933          | 8.74293            | 8.74293                      | T up vs N                              | 25.393  | 44.033    | 27.7445    | 1         |
| cg21771173                      | DOCK2                   | 0.0001301         | 0.000130097          | 4.34527            | 4.34527                      | T up vs N                              | 25.029  | 20.2142   | 12.9219    | 1         |
| cg21771250                      | FAM83F                  | 0.00174102        | 0.00174102           | 3.10232            | 3.10232                      | T up vs N                              | 14.076  | 12.0052   | 13.6459    | 1         |
| cg21772826                      | TPRG1                   | 0.00138114        | 0.00138114           | 0.263936           | -3.78879                     | T down vs N                            | 14.912  | 16.6188   | 17.8314    | 1         |
| cg21775122                      | PSG4;PSG4               | 1.44E-06          | 1.44E-06             | 0.14519            | -6.88752                     | T down vs N                            | 55.102  | 34.8775   | 10.1275    | 1         |
| cg21775668                      | LOC285733               | 0.00010359        | 0.000103586          | 0.242563           | -4.12264                     | T down vs N                            | 26.177  | 18.7928   | 11.4868    | 1         |
| cg21778987                      | MAP3K5                  | 7.81E-05          | 7.81E-05             | 0.332975           | -3.00323                     | T down vs N                            | 27.644  | 11.3266   | 6.55582    | 1         |
| cg21783442                      | TIMM17A                 | 0.0073185         | 0.0073185            | 0.261647           | -3.82194                     | T down vs N                            | 9.4278  | 16.8369   | 28.574     | 1         |
| cg21784383                      | ESRRG                   | 0.00652353        | 0.00652353           | 5.72069            | 5.72069                      | T up vs N                              | 9.768   | 28.4904   | 46.6674    | 1         |
| cg21787063                      | ASB4;ASB4               | 2.87E-05          | 2.87E-05             | 0.165843           | -6.02981                     | T down vs N                            | 33.291  | 30.2357   | 14.5317    | 1         |
| cg21789326                      | LOC441204               | 2.51E-06          | 2.51E-06             | 0.285551           | -3.502                       | T down vs N                            | 50.425  | 14.7128   | 4.66844    | 1         |
| cg21790344                      | LPGAT1                  | 3.38E-05          | 3.38E-05             | 0.201548           | -4.9616                      | T down vs N                            | 32.325  | 24.0292   | 11.894     | 1         |
| cg21791017                      | LTKE;LTKE;LTKE          | 7.65E-05          | 7.65E-05             | 7.21361            | 7.21361                      | T up vs N                              | 27.755  | 36.5698   | 21.0814    | 1         |
| cg21798060                      | CFB                     | 0.00013882        | 0.000138824          | 0.090878           | -11.0037                     | T down vs N                            | 24.709  | 53.8698   | 34.8834    | 1         |
| cg21800193                      | NOTCH4                  | 0.00022302        | 0.00022302           | 0.282709           | -3.5372                      | T down vs N                            | 22.445  | 14.9486   | 10.6563    | 1         |
| cg21806015                      | NXPH1                   | 2.62E-06          | 2.62E-06             | 27.2692            | 27.2692                      | T up vs N                              | 50.078  | 102.354   | 32.7021    | 1         |
| cg21808287                      | TNP1                    | 0.00043122        | 0.000431217          | 0.300213           | -3.33097                     | T down vs N                            | 19.515  | 13.5607   | 11.1182    | 1         |
| cg21811204                      | SHROOM1                 | 0.0012152         | 0.0012152            | 3.54852            | 3.54852                      | T up vs N                              | 15.385  | 15.0242   | 15.625     | 1         |
| cg21811549                      | ZNF735                  | 0.00061462        | 0.000614617          | 0.318122           | -3.14345                     | T down vs N                            | 18.04   | 12.2861   | 10.8969    | 1         |
| cg21812277                      | PARP4                   | 2.73E-06          | 2.73E-06             | 0.097715           | -10.2338                     | T down vs N                            | 49.745  | 50.6604   | 16.2944    | 1         |
| RAB34;RAB34;RAB34;RAB34;RAB34;R |                         |                   |                      |                    |                              |                                        |         |           |            |           |
| cg21816330                      | AB34;RAB34;RAB34;RAB34  | 0.00147461        | 0.00147461           | 30.8593            | 30.8593                      | T up vs N                              | 14.673  | 110.156   | 120.118    | 1         |
| cg21817012                      | SLAMF9;SLAMF9;SLAMF9    | 3.82E-06          | 3.82E-06             | 0.201962           | -4.95142                     | T down vs N                            | 47.089  | 23.9676   | 8.14377    | 1         |
| cg21819468                      | PDPN;PDPN;PDPN;PDPN     | 0.004078          | 0.004078             | 30.9622            | 30.9622                      | T up vs N                              | 11.214  | 110.37    | 157.472    | 1         |
| cg21823426                      | LOC285768;LOC285768     | 0.0043086         | 0.0043086            | 0.33266            | -3.00607                     | T down vs N                            | 11.04   | 11.3461   | 16.4436    | 1         |
| cg21823605                      | CRCT1                   | 0.00024444        | 0.00024444           | 0.271051           | -3.68935                     | T down vs N                            | 22.022  | 15.9618   | 11.5969    | 1         |
| cg21824620                      | PSME3;PSME3             | 8.91E-06          | 8.91E-06             | 0.1858             | -5.38214                     | T down vs N                            | 40.87   | 26.5323   | 10.387     | 1         |
| cg21827481                      | XPO4                    | 0.00107127        | 0.00107127           | 0.288778           | -3.46287                     | T down vs N                            | 15.858  | 14.4502   | 14.5793    | 1         |
| cg21827809                      | TP73                    | 2.81E-05          | 2.81E-05             | 0.152897           | -6.54033                     | T down vs N                            | 33.425  | 33.0329   | 15.8124    | 1         |
| cg21829923                      | SP5                     | 0.00033315        | 0.00033315           | 5.10708            | 5.10708                      | T up vs N                              | 20.632  | 24.9041   | 19.3129    | 1         |
| cg21830459                      | CECR1;CECR1             | 0.00015919        | 0.000159191          | 8.77679            | 8.77679                      | T up vs N                              | 24.041  | 44.1902   | 29.4103    | 1         |
| cg21831937                      | TCF12;TCF12;TCF12;TCF12 | 0.00012347        | 0.000123472          | 0.284415           | -3.51599                     | T down vs N                            | 25.29   | 14.8065   | 9.36771    | 1         |
| cg21833776                      | FAM55D;FAM55D           | 0.00025647        | 0.000256468          | 0.322587           | -3.09994                     | T down vs N                            | 21.803  | 11.989    | 8.79806    | 1         |
| cg21834684                      | STON2                   | 0.00142008        | 0.00142008           | 0.307491           | -3.25213                     | T down vs N                            | 14.81   | 13.0262   | 14.0726    | 1         |
| cg21835643                      | MATN4;MATN4;RBPJL;MATN4 | 2.34E-06          | 2.34E-06             | 8.91561            | 8.91561                      | T up vs N                              | 51.007  | 44.831    | 14.0628    | 1         |
| cg21836699                      | MIR548I2                | 0.00191836        | 0.00191836           | 0.221955           | -4.50541                     | T down vs N                            | 13.734  | 21.2225   | 24.7247    | 1         |

| Probeset ID | UCSC_REFGENE_NAME                                                                       | p-value<br>(Type) | p-value (T vs.<br>N) | Ratio (T<br>vs. N) | Fold-<br>Change (T<br>vs. N) | Fold-Change (T vs.<br>N) (Description) | F(Type) | SS (Type) | SS (Error) | F (Error) |
|-------------|-----------------------------------------------------------------------------------------|-------------------|----------------------|--------------------|------------------------------|----------------------------------------|---------|-----------|------------|-----------|
| cg21836903  | FOXP1                                                                                   | 2.06E-05          | 2.06E-05             | 0.216071           | -4.62811                     | T down vs N                            | 35.342  | 21.9868   | 9.95401    | 1         |
| cg21837569  | RBM5                                                                                    | 0.0001121         | 0.000112103          | 0.237011           | -4.21922                     | T down vs N                            | 25.775  | 19.4122   | 12.0503    | 1         |
| cg21837826  | FAM163A                                                                                 | 3.34E-05          | 3.34E-05             | 0.279491           | -3.57794                     | T down vs N                            | 32.392  | 15.2208   | 7.51829    | 1         |
| cg21839138  | C15orf48;C15orf48                                                                       | 7.42E-05          | 7.42E-05             | 11.798             | 11.798                       | T up vs N                              | 27.92   | 57.0461   | 32.6914    | 1         |
| cg21841620  | ZNF800                                                                                  | 1.37E-06          | 1.37E-06             | 0.309295           | -3.23316                     | T down vs N                            | 55.548  | 12.8973   | 3.71493    | 1         |
| cg21843272  | VDR;VDR                                                                                 | 0.00278439        | 0.00278439           | 0.286799           | -3.48677                     | T down vs N                            | 12.458  | 14.6106   | 18.7654    | 1         |
| cg21844669  | CCDC60                                                                                  | 1.62E-05          | 1.62E-05             | 0.194187           | -5.14967                     | T down vs N                            | 36.869  | 25.1585   | 10.9179    | 1         |
| cg21846488  | LCE4A                                                                                   | 0.00027209        | 0.000272092          | 0.225405           | -4.43646                     | T down vs N                            | 21.535  | 20.7898   | 15.4465    | 1         |
| cg21847347  | RAB37;CD300LF                                                                           | 4.41E-06          | 4.41E-06             | 0.111147           | -8.9971                      | T down vs N                            | 45.989  | 45.2046   | 15.7272    | 1         |
| cg21847405  | KLHL12                                                                                  | 0.00010013        | 0.000100129          | 0.176388           | -5.66931                     | T down vs N                            | 26.35   | 28.1964   | 17.121     | 1         |
| cg21848084  | PRDM16;PRDM16                                                                           | 0.00025579        | 0.000255791          | 0.313467           | -3.19013                     | T down vs N                            | 21.815  | 12.6044   | 9.24462    | 1         |
| cg21849393  | FLT3                                                                                    | 0.00460201        | 0.00460201           | 5.74872            | 5.74872                      | T up vs N                              | 10.833  | 28.6503   | 42.3147    | 1         |
| cg21850448  | AFF1;AFF1                                                                               | 5.83E-05          | 5.83E-05             | 0.333097           | -3.00213                     | T down vs N                            | 29.223  | 11.3191   | 6.1973     | 1         |
| cg21851534  | ZZEF1                                                                                   | 0.00203088        | 0.00203088           | 3.69779            | 3.69779                      | T up vs N                              | 13.534  | 16.0177   | 18.9358    | 1         |
| cg21853871  | HOBX3                                                                                   | 0.00122898        | 0.00122898           | 4.39133            | 4.39133                      | T up vs N                              | 15.343  | 20.5054   | 21.3837    | 1         |
| cg21854348  | IL1F5;IL1F5                                                                             | 3.07E-05          | 3.07E-05             | 0.256364           | -3.9007                      | T down vs N                            | 32.897  | 17.3531   | 8.43999    | 1         |
| cg21854952  | HIC1;HIC1                                                                               | 8.72E-05          | 8.72E-05             | 3.4469             | 3.4469                       | T up vs N                              | 27.065  | 14.3428   | 8.47911    | 1         |
| cg21855135  | LOC339674                                                                               | 0.00020227        | 0.000202269          | 4.69147            | 4.69147                      | T up vs N                              | 22.9    | 22.3789   | 15.636     | 1         |
| cg21855830  | CYP27C1                                                                                 | 0.00045009        | 0.000450091          | 0.125525           | -7.96654                     | T down vs N                            | 19.333  | 40.3369   | 33.3827    | 1         |
| cg21858255  | TXNRD1                                                                                  | 0.00015989        | 0.000159894          | 23.4797            | 23.4797                      | T up vs N                              | 24.019  | 93.2982   | 62.1488    | 1         |
| cg21858961  | MCM3                                                                                    | 0.00010842        | 0.00010842           | 0.232412           | -4.3027                      | T down vs N                            | 25.944  | 19.9442   | 12.2998    | 1         |
| cg21859019  | C1orf130                                                                                | 0.00013468        | 0.000134676          | 0.324313           | -3.08344                     | T down vs N                            | 24.858  | 11.8761   | 7.64413    | 1         |
| cg21859880  | HIPK2;HIPK2                                                                             | 0.00366198        | 0.00366198           | 3.05821            | 3.05821                      | T up vs N                              | 11.558  | 11.7034   | 16.2007    | 1         |
| cg21860667  | TDRD10;TDRD10                                                                           | 7.25E-05          | 7.25E-05             | 0.179194           | -5.58054                     | T down vs N                            | 28.04   | 27.6858   | 15.7982    | 1         |
| cg21860675  | FOXP1;FOXP1                                                                             | 0.00010809        | 0.000108085          | 0.222627           | -4.49182                     | T down vs N                            | 25.96   | 21.1373   | 13.0277    | 1         |
| cg21863698  | PDZRN3                                                                                  | 0.00537149        | 0.00537149           | 0.306445           | -3.26323                     | T down vs N                            | 10.355  | 13.1016   | 20.2438    | 1         |
| cg21864304  | VGLL4                                                                                   | 0.00036676        | 0.000366762          | 3.65351            | 3.65351                      | T up vs N                              | 20.212  | 15.724    | 12.4475    | 1         |
| cg21866125  | RFPL4A                                                                                  | 1.80E-05          | 1.80E-05             | 0.185713           | -5.38466                     | T down vs N                            | 36.17   | 26.547    | 11.7431    | 1         |
| cg21867850  | LTKE;LTKE;LTKE                                                                          | 8.90E-06          | 8.90E-06             | 0.290031           | -3.4479                      | T down vs N                            | 40.871  | 14.3496   | 5.61746    | 1         |
| cg21868134  | HPDL;HPDL                                                                               | 0.00112447        | 0.00112447           | 18.2136            | 18.2136                      | T up vs N                              | 15.675  | 78.8872   | 80.521     | 1         |
| cg21869609  | LINGO3                                                                                  | 0.00016045        | 0.00016045           | 11.7427            | 11.7427                      | T up vs N                              | 24.003  | 56.8291   | 37.8821    | 1         |
| cg21870884  | GPR25                                                                                   | 2.27E-05          | 2.27E-05             | 7.14875            | 7.14875                      | T up vs N                              | 34.726  | 36.2362   | 16.6959    | 1         |
| cg21871038  | TFAP2D                                                                                  | 0.00068696        | 0.000686959          | 0.207954           | -4.80876                     | T down vs N                            | 17.59   | 23.0996   | 21.0113    | 1         |
| cg21871213  | MYH10                                                                                   | 0.00015965        | 0.000159649          | 5.79879            | 5.79879                      | T up vs N                              | 24.027  | 28.9352   | 19.2686    | 1         |
| cg21871465  | NAP1L4                                                                                  | 0.00040741        | 0.00040741           | 5.67973            | 5.67973                      | T up vs N                              | 29.667  | 15.9833   | 4.84888    | 1         |
| cg21872037  | SLC13A5;SLC13A5                                                                         | 9.88E-06          | 9.88E-06             | 8.36482            | 8.36482                      | T up vs N                              | 40.155  | 42.2557   | 16.8372    | 1         |
| cg21872764  | CLDN5;CLDN5;CLDN5                                                                       | 1.42E-05          | 1.42E-05             | 15.2996            | 15.2996                      | T up vs N                              | 37.729  | 69.6939   | 29.5554    | 1         |
| cg21872782  | HOBX3                                                                                   | 2.48E-06          | 2.48E-06             | 7.17366            | 7.17366                      | T up vs N                              | 50.52   | 36.3645   | 11.5168    | 1         |
| cg21873967  | ZSCAN4                                                                                  | 0.00469838        | 0.00469838           | 0.256242           | -3.90256                     | T down vs N                            | 10.769  | 17.3653   | 25.8014    | 1         |
| cg21878746  | LAIR1;LAIR1                                                                             | 1.59E-05          | 1.59E-05             | 0.037042           | -26.9963                     | T down vs N                            | 36.99   | 101.732   | 44.0042    | 1         |
| cg21878759  | LOXHD1;LOXHD1;LOXHD1                                                                    | 0.00025454        | 0.000254543          | 0.328017           | -3.04862                     | T down vs N                            | 21.837  | 11.6378   | 8.52692    | 1         |
| cg21878934  | ITGAV;ITGAV;ITGAV                                                                       | 0.00157192        | 0.00157192           | 0.317365           | -3.15094                     | T down vs N                            | 14.442  | 12.3373   | 13.6684    | 1         |
| cg21880712  | ZNF136                                                                                  | 0.00098154        | 0.000981544          | 0.244079           | -4.09704                     | T down vs N                            | 16.192  | 18.6278   | 18.4076    | 1         |
| cg21880888  | DDR2;DDR2                                                                               | 5.69E-05          | 5.69E-05             | 0.216059           | -4.62836                     | T down vs N                            | 29.353  | 21.9884   | 11.9856    | 1         |
| cg21880903  | KLB                                                                                     | 0.00148832        | 0.00148832           | 0.290201           | -3.44589                     | T down vs N                            | 14.639  | 14.336    | 15.6684    | 1         |
| cg21884568  | FLJ35220;FLJ35220;FLJ35220;LOC100294362                                                 | 6.06E-05          | 6.06E-05             | 0.230079           | -4.34633                     | T down vs N                            | 29.014  | 20.221    | 11.1509    | 1         |
|             | PCDHA6;PCDHA2;PCDHA1;PCDHA1;PCDHA6;PCDHA5;PCDHA3;PCDHA4;PCDHA6                          | 6.71E-05          | 6.71E-05             | 3.50271            | 3.50271                      | T up vs N                              | 28.454  | 14.7176   | 8.27598    | 1         |
| cg21887309  | HA6                                                                                     | 4.59E-05          | 4.59E-05             | 6.67722            | 6.67722                      | T up vs N                              | 30.553  | 33.7656   | 17.6825    | 1         |
| cg21891490  | KCNIP4;KCNIP4;KCNIP4                                                                    | 0.00242097        | 0.00242097           | 3.07138            | 3.07138                      | T up vs N                              | 12.929  | 11.7936   | 14.5946    | 1         |
| cg21895387  | LASS3                                                                                   | 0.00016115        | 0.000161152          | 0.326238           | -3.06525                     | T down vs N                            | 23.982  | 11.7516   | 7.84047    | 1         |
| cg21897034  | EXOG;EXOG                                                                               | 3.63E-05          | 3.63E-05             | 0.215873           | -4.63235                     | T down vs N                            | 31.906  | 22.0132   | 11.0389    | 1         |
| cg21902245  | TBX22;TBX22                                                                             | 6.80E-05          | 6.80E-05             | 0.321596           | -3.10949                     | T down vs N                            | 28.381  | 12.0542   | 6.79559    | 1         |
| cg21903395  | TMEM132D                                                                                |                   |                      |                    |                              |                                        |         |           |            |           |
| cg21908557  | PCDHGA4;PCDHGA6;PCDHGA1;PCDHGA7;PCDHGA5;PCDHGB1;PCDHGA3;PCDHGA2;PCDHGB2;PCDHGB3         | 0.00010873        | 0.000108726          | 4.57204            | 4.57204                      | T up vs N                              | 25.93   | 21.6384   | 13.352     | 1         |
|             | MEA1;KLHDC3                                                                             | 0.00061347        | 0.000613469          | 0.275817           | -3.62559                     | T down vs N                            | 18.047  | 15.5384   | 13.7756    | 1         |
|             | LOC152024                                                                               | 4.73E-06          | 4.73E-06             | 0.243575           | -4.10551                     | T down vs N                            | 45.457  | 18.6825   | 6.57585    | 1         |
|             | PTPRN2;PTPRN2;PTPRN2                                                                    | 0.00124809        | 0.00124809           | 3.93124            | 3.93124                      | T up vs N                              | 15.286  | 17.5525   | 18.373     | 1         |
|             | NPC2                                                                                    | 4.95E-05          | 4.95E-05             | 0.315001           | -3.17459                     | T down vs N                            | 30.125  | 12.4985   | 6.63833    | 1         |
| cg21915313  | PCDHGA4;PCDHGA6;PCDHGA1;PCDHGA5;PCDHGB1;PCDHGB4;PCDHGA3;PCDHGA2;PCDHGA8;PCDHGA7;PCDHGB2 | 1.09E-05          | 1.09E-05             | 6.30275            | 6.30275                      | T up vs N                              | 39.493  | 31.7441   | 12.8608    | 1         |
|             | FBXO41                                                                                  | 3.82E-06          | 3.82E-06             | 7.94476            | 7.94476                      | T up vs N                              | 47.081  | 40.2306   | 13.6719    | 1         |
|             | TRPV6                                                                                   | 7.85E-05          | 7.85E-05             | 0.246937           | -4.04961                     | T down vs N                            | 27.62   | 18.3215   | 10.6136    | 1         |
|             | AMT;AMT;AMT;NICN1;AMT;AMT;AMT;AMT;AMT;AMT                                               | 0.00027875        | 0.000278754          | 3.27679            | 3.27679                      | T up vs N                              | 21.426  | 13.1936   | 9.85253    | 1         |

| Probeset ID | UCSC_REFGENE_NAME                                                                               | p-value<br>(Type) | p-value (T vs.<br>N) | Ratio (T<br>vs. N) | Fold-<br>Change (T<br>vs. N) | Fold-Change (T vs.<br>N) (Description) | F(Type) | SS (Type) | SS (Error) | F (Error) |
|-------------|-------------------------------------------------------------------------------------------------|-------------------|----------------------|--------------------|------------------------------|----------------------------------------|---------|-----------|------------|-----------|
| cg21928406  | PCDHGA4;PCDHGA9;PCDHGA1;PCDHG<br>B1;PCDHGB6;PCDHGB3;PCDHGA11;PC<br>DHGB7;PCDHGA6;PCDHGA8;PCDHGA | 2.48E-05          | 2.48E-05             | 3.44377            | 3.44377                      | T up vs N                              | 34.171  | 14.3218   | 6.7059     | 1         |
| cg21929183  | PCDHGA4;PCDHGA11;PCDHGA11;PCD<br>HGA9;PCDHGA1;PCDHGB1;PCDHGB8P                                  | 5.14E-06          | 5.14E-06             | 5.69536            | 5.69536                      | T up vs N                              | 44.831  | 28.3456   | 10.1164    | 1         |
| cg21929472  | SCARA3;SCARA3                                                                                   | 0.00029138        | 0.000291379          | 0.274234           | -3.64653                     | T down vs N                            | 21.227  | 15.6776   | 11.8172    | 1         |
| cg21929564  | CCDC152                                                                                         | 0.00292211        | 0.00292211           | 7.31155            | 7.31155                      | T up vs N                              | 12.297  | 37.0706   | 48.2348    | 1         |
| cg21929771  | PTPRU;PTPRU;PTPRU                                                                               | 0.00162884        | 0.00162884           | 19.0586            | 19.0586                      | T up vs N                              | 14.314  | 81.372    | 90.9564    | 1         |
| cg21930712  | C19orf75;C19orf75                                                                               | 0.00219974        | 0.00219974           | 0.294983           | -3.39003                     | T down vs N                            | 13.258  | 13.9597   | 16.8475    | 1         |
| cg21931078  | CDC42EP5                                                                                        | 1.95E-06          | 1.95E-06             | 0.292403           | -3.41994                     | T down vs N                            | 52.522  | 14.1614   | 4.31406    | 1         |
| cg21931680  | AMPD1                                                                                           | 1.27E-05          | 1.27E-05             | 0.132288           | -7.55925                     | T down vs N                            | 38.449  | 38.3226   | 15.9475    | 1         |
| cg21934230  | WNT3A                                                                                           | 4.19E-05          | 4.19E-05             | 0.236172           | -4.23421                     | T down vs N                            | 31.075  | 19.508    | 10.0444    | 1         |
| cg21935113  | C11orf95                                                                                        | 5.63E-05          | 5.63E-05             | 7.11379            | 7.11379                      | T up vs N                              | 29.414  | 36.0558   | 19.6128    | 1         |
| cg21935536  | ANPEP                                                                                           | 0.00032211        | 0.000322112          | 0.253566           | -3.94374                     | T down vs N                            | 20.781  | 17.6341   | 13.5773    | 1         |
| cg21936464  | LELP1                                                                                           | 3.23E-05          | 3.23E-05             | 0.22046            | -4.53597                     | T down vs N                            | 32.59   | 21.4135   | 10.5128    | 1         |
| cg21936552  | BAHCC1                                                                                          | 0.00011251        | 0.000112505          | 0.183491           | -5.44985                     | T down vs N                            | 25.757  | 26.9279   | 16.7274    | 1         |
| cg21938406  | C1orf115                                                                                        | 0.00414049        | 0.00414049           | 3.24397            | 3.24397                      | T up vs N                              | 11.166  | 12.9708   | 18.5863    | 1         |
| cg21940220  | AFMID;TK1;AFMID;AFMID                                                                           | 9.00E-06          | 9.00E-06             | 0.203169           | -4.92201                     | T down vs N                            | 40.8    | 23.7894   | 9.32913    | 1         |
| cg21943004  | ORAD11                                                                                          | 5.53E-05          | 5.53E-05             | 0.234066           | -4.2723                      | T down vs N                            | 29.51   | 19.7509   | 10.7086    | 1         |
| cg21945322  | PSG8;PSG8;PSG8                                                                                  | 7.46E-05          | 7.46E-05             | 0.237302           | -4.21405                     | T down vs N                            | 27.887  | 19.3792   | 11.1186    | 1         |
| cg21945949  | HSPC159                                                                                         | 0.00267043        | 0.00267043           | 0.262808           | -3.80506                     | T down vs N                            | 12.598  | 16.7259   | 21.2434    | 1         |
| cg21947116  | COL18A1;COL18A1;COL18A1                                                                         | 0.00040857        | 0.000408568          | 0.323241           | -3.09367                     | T down vs N                            | 19.746  | 11.9461   | 9.68       | 1         |
| cg21948564  | LMAN1L                                                                                          | 1.85E-05          | 1.85E-05             | 0.262819           | -3.8049                      | T down vs N                            | 36.017  | 16.7249   | 7.42981    | 1         |
| cg21948655  | SMCP                                                                                            | 4.48E-05          | 4.48E-05             | 0.203143           | -4.92264                     | T down vs N                            | 30.699  | 23.7933   | 12.401     | 1         |
| cg21951975  | IRF6                                                                                            | 0.00107897        | 0.00107897           | 4.05422            | 4.05422                      | T up vs N                              | 15.831  | 18.3513   | 18.547     | 1         |
| cg21957905  | SORCS2                                                                                          | 0.00693954        | 0.00693954           | 0.262237           | -3.81335                     | T down vs N                            | 9.5845  | 16.7804   | 28.0128    | 1         |
| cg21959618  | AFF3;AFF3                                                                                       | 0.00012106        | 0.000121056          | 0.305691           | -3.27128                     | T down vs N                            | 25.388  | 13.1562   | 8.2912     | 1         |
| cg21959619  | FBXL6;GPR172A;FBXL6                                                                             | 0.00179518        | 0.00179518           | 0.314236           | -3.18232                     | T down vs N                            | 13.968  | 12.5513   | 14.3776    | 1         |
| cg21961527  | LHX5                                                                                            | 0.00291236        | 0.00291236           | 0.318954           | -3.13525                     | T down vs N                            | 12.308  | 12.2302   | 15.899     | 1         |
| cg21961694  | SLC22A25                                                                                        | 1.92E-05          | 1.92E-05             | 0.210745           | -4.74507                     | T down vs N                            | 35.78   | 22.709    | 10.1548    | 1         |
| cg21961766  | PRRG2                                                                                           | 4.32E-06          | 4.32E-06             | 0.222781           | -4.48871                     | T down vs N                            | 46.14   | 21.1178   | 7.32299    | 1         |
| cg21961970  | UNC5CL                                                                                          | 7.78E-05          | 7.78E-05             | 0.262814           | -3.80497                     | T down vs N                            | 27.666  | 16.7254   | 9.67269    | 1         |
| cg21962791  | PYROXD1                                                                                         | 8.39E-06          | 8.39E-06             | 0.212729           | -4.70082                     | T down vs N                            | 41.29   | 22.4365   | 8.69418    | 1         |
| cg21963535  | WFDC2                                                                                           | 1.05E-05          | 1.05E-05             | 6.73012            | 6.73012                      | T up vs N                              | 39.715  | 34.0469   | 13.7163    | 1         |
| cg21964231  | PLK5P                                                                                           | 8.69E-05          | 8.69E-05             | 0.158209           | -6.32076                     | T down vs N                            | 27.085  | 31.8426   | 18.8104    | 1         |
| cg21964800  | LGALS12;LGALS12;LGALS12                                                                         | 9.93E-06          | 9.93E-06             | 0.297786           | -3.35812                     | T down vs N                            | 40.121  | 13.7443   | 5.48112    | 1         |
| cg21966764  | ORS2B2                                                                                          | 1.33E-05          | 1.33E-05             | 0.230292           | -4.34231                     | T down vs N                            | 38.137  | 20.1955   | 8.47282    | 1         |
| cg21967545  | FUT6;FUT6;FUT6;FUT6                                                                             | 5.88E-05          | 5.88E-05             | 0.316832           | -3.15625                     | T down vs N                            | 29.171  | 12.3735   | 6.78686    | 1         |
| cg21967789  | ARHGEF10                                                                                        | 0.00036916        | 0.00036916           | 3.11926            | 3.11926                      | T up vs N                              | 20.183  | 12.121    | 9.60873    | 1         |
| cg21967790  | C6orf218                                                                                        | 2.02E-06          | 2.02E-06             | 0.134183           | -7.45253                     | T down vs N                            | 52.227  | 37.7858   | 11.5758    | 1         |
| cg21972727  | VPS52                                                                                           | 0.000572          | 0.000572003          | 0.286816           | -3.48656                     | T down vs N                            | 18.334  | 14.6092   | 12.7498    | 1         |
| cg21982437  | SIGLECP3                                                                                        | 0.00129039        | 0.00129039           | 0.308041           | -3.24632                     | T down vs N                            | 15.162  | 12.9867   | 13.7044    | 1         |
| cg21982924  | ATP6V1G2;NFKBIL1;NFKBIL1;NFKBIL1;                                                               | 0.00012229        | 0.000122292          | 0.22311            | -4.4821                      | T down vs N                            | 25.338  | 21.0764   | 13.3092    | 1         |
| cg21985951  | CBR4                                                                                            | 1.02E-06          | 1.02E-06             | 0.172911           | -5.78334                     | T down vs N                            | 58.176  | 28.8474   | 7.9338     | 1         |
| cg21986821  | GPR108;GPR108                                                                                   | 2.98E-05          | 2.98E-05             | 0.205646           | -4.86273                     | T down vs N                            | 33.07   | 23.4291   | 11.3354    | 1         |
| cg21987785  | SBSN;SBSN;SBSN;SBSN;SBSN;SBSN                                                                   | 3.72E-05          | 3.72E-05             | 0.276559           | -3.61586                     | T down vs N                            | 31.768  | 15.4736   | 7.79331    | 1         |
| cg21990700  | LOC283314;C1RL                                                                                  | 0.00177376        | 0.00177376           | 0.329169           | -3.03795                     | T down vs N                            | 14.01   | 11.5647   | 13.2072    | 1         |
| cg21992696  | MBOAT2                                                                                          | 0.00090057        | 0.000900569          | 0.330477           | -3.02593                     | T down vs N                            | 16.523  | 11.4823   | 11.1188    | 1         |
| cg21992771  | ZNF185                                                                                          | 1.88E-05          | 1.88E-05             | 0.11788            | -8.48318                     | T down vs N                            | 35.922  | 42.8166   | 19.071     | 1         |
| cg21993547  | NOTCH4                                                                                          | 2.59E-07          | 2.59E-07             | 0.112223           | -8.9108                      | T down vs N                            | 71.872  | 44.8089   | 9.97532    | 1         |
| cg21997766  | GRIN2C                                                                                          | 4.58E-05          | 4.58E-05             | 0.273748           | -3.65299                     | T down vs N                            | 30.574  | 15.7206   | 8.22688    | 1         |
| cg21998840  | MAD1L1;MAD1L1;MAD1L1                                                                            | 0.00088269        | 0.000882685          | 0.329526           | -3.03466                     | T down vs N                            | 16.601  | 11.5421   | 11.1244    | 1         |
| cg22001557  | ZNF671                                                                                          | 0.00158433        | 0.00158433           | 0.318782           | -3.13694                     | T down vs N                            | 14.414  | 12.2417   | 13.5892    | 1         |
| cg22004774  | IL22RA2;IL22RA2;IL22RA2                                                                         | 0.00011066        | 0.000110661          | 0.253345           | -3.94719                     | T down vs N                            | 25.841  | 17.6565   | 10.9326    | 1         |
| cg22009709  | PIN4;PIN4;PIN4                                                                                  | 3.41E-05          | 3.41E-05             | 0.219591           | -4.55391                     | T down vs N                            | 32.278  | 21.5255   | 10.6701    | 1         |
| cg22009908  | EFNA5                                                                                           | 2.82E-06          | 2.82E-06             | 0.266005           | -3.75933                     | T down vs N                            | 49.483  | 16.4246   | 5.31077    | 1         |
| cg22010052  | LVRN                                                                                            | 0.00068638        | 0.000686376          | 4.2749             | 4.2749                       | T up vs N                              | 17.594  | 19.7674   | 17.9768    | 1         |
| cg22014112  | TNFAIP3                                                                                         | 0.00227895        | 0.00227895           | 0.257113           | -3.88935                     | T down vs N                            | 13.136  | 17.2789   | 21.0464    | 1         |
| cg22014834  | SPRR2A                                                                                          | 0.00171616        | 0.00171616           | 0.329713           | -3.03294                     | T down vs N                            | 14.127  | 11.5303   | 13.0587    | 1         |
| cg22016094  | HLA-DOB                                                                                         | 2.10E-05          | 2.10E-05             | 0.249225           | -4.01243                     | T down vs N                            | 35.208  | 18.0807   | 8.21657    | 1         |
| cg22016731  | TRIT1                                                                                           | 0.00066393        | 0.000663926          | 0.296488           | -3.37282                     | T down vs N                            | 17.727  | 13.8436   | 12.4947    | 1         |
| cg22017213  | ARHGAP24;ARHGAP24;ARHGAP24                                                                      | 0.00063838        | 0.000638375          | 0.307393           | -3.25316                     | T down vs N                            | 17.886  | 13.0332   | 11.659     | 1         |
| cg22022442  | C12orf72;C12orf72                                                                               | 0.00212859        | 0.00212859           | 0.241748           | -4.13654                     | T down vs N                            | 13.371  | 18.8822   | 22.5946    | 1         |
| cg22023826  | BMP5                                                                                            | 0.00074212        | 0.000742115          | 0.329774           | -3.03238                     | T down vs N                            | 17.282  | 11.5265   | 10.6714    | 1         |
| cg22024120  | FLOT1                                                                                           | 1.67E-05          | 1.67E-05             | 0.184543           | -5.41878                     | T down vs N                            | 36.651  | 26.7466   | 11.6763    | 1         |
| cg22025206  | SLC9A3                                                                                          | 2.71E-05          | 2.71E-05             | 0.256924           | -3.8922                      | T down vs N                            | 33.649  | 17.2975   | 8.22503    | 1         |
| cg22029157  | IRF6                                                                                            | 0.00062496        | 0.000624964          | 3.06432            | 3.06432                      | T up vs N                              | 17.972  | 11.7453   | 10.4566    | 1         |
| cg22029476  | LILRA1                                                                                          | 2.44E-05          | 2.44E-05             | 0.163324           | -6.12281                     | T down vs N                            | 34.29   | 30.7531   | 14.3496    | 1         |

| Probeset ID                                                                             | UCSC_REFGENE_NAME             | p-value<br>(Type) | p-value (T vs.<br>N) | Ratio (T<br>vs. N) | Fold-<br>Change (T<br>vs. N) | Fold-Change (T vs.<br>N) (Description) | F(Type) | SS (Type) | SS (Error) | F (Error) |
|-----------------------------------------------------------------------------------------|-------------------------------|-------------------|----------------------|--------------------|------------------------------|----------------------------------------|---------|-----------|------------|-----------|
| cg22031783                                                                              | PRDM16;PRDM16                 | 0.00035336        | 0.000353362          | 0.184843           | -5.41001                     | T down vs N                            | 20.374  | 26.6953   | 20.9644    | 1         |
| cg22032521                                                                              | HYLS1;HYLS1;HYLS1             | 0.00075538        | 0.000755383          | 6.61934            | 6.61934                      | T up vs N                              | 17.212  | 33.4567   | 31.1013    | 1         |
| cg22032706                                                                              | TSPAN12                       | 3.11E-06          | 3.11E-06             | 0.18297            | -5.46538                     | T down vs N                            | 48.701  | 27.0184   | 8.87653    | 1         |
| cg22040627                                                                              | SLC13A5;SLC13A5               | 0.00062911        | 0.000629105          | 14.6982            | 14.6982                      | T up vs N                              | 17.945  | 67.6599   | 60.3262    | 1         |
| PCDHGA4;PCDHGA6;PCDHGA1;PCDHGA5;PCDHGB1;PCDHGA3;PCDHGA2;PCDHGB4;PCDHGA7;PCDHGB2;PCDHGB4 |                               |                   |                      |                    |                              |                                        |         |           |            |           |
| cg22041640                                                                              | DHGB4;PCDHGA7;PCDHGB2;PCDHGB4 | 0.00067197        | 0.000671969          | 4.13651            | 4.13651                      | T up vs N                              | 17.679  | 18.882    | 17.0889    | 1         |
| cg22043588                                                                              | USH1C;USH1C                   | 0.0001501         | 0.000150099          | 3.13515            | 3.13515                      | T up vs N                              | 24.326  | 12.2295   | 8.04371    | 1         |
| cg22046408                                                                              | LTBP4;LTBP4;LTBP4             | 0.00205743        | 0.00205743           | 0.230531           | -4.33781                     | T down vs N                            | 13.489  | 20.1669   | 23.9209    | 1         |
| cg22050733                                                                              | CROCC                         | 1.41E-06          | 1.41E-06             | 9.55099            | 9.55099                      | T up vs N                              | 55.283  | 47.6967   | 13.8043    | 1         |
| PCDHGA4;PCDHGB5;PCDHGA6;PCDHGA1;PCDHGA8;PCDHGA5;PCDHGB1;PCDHGB5;PCDHGB4;PCDHGA3;PCDHGA2 |                               |                   |                      |                    |                              |                                        |         |           |            |           |
| cg22052948                                                                              | DHGB5;PCDHGB4;PCDHGA3;PCDHGA2 | 0.00623869        | 0.00623869           | 4.4452             | 4.4452                       | T up vs N                              | 9.9015  | 20.8448   | 33.6834    | 1         |
| cg22054918                                                                              | PRDM8;PRDM8                   | 8.17E-06          | 8.17E-06             | 83.1954            | 83.1954                      | T up vs N                              | 41.475  | 183.08    | 70.6271    | 1         |
| cg22059812                                                                              | HTR6                          | 0.00020771        | 0.00020771           | 4.19662            | 4.19662                      | T up vs N                              | 22.776  | 19.2677   | 13.5357    | 1         |
| cg22061831                                                                              | ARHGEF4;ARHGEF4               | 0.00276828        | 0.00276828           | 7.15964            | 7.15964                      | T up vs N                              | 12.477  | 36.2923   | 46.5401    | 1         |
| cg22062007                                                                              | RASGRF2                       | 3.89E-06          | 3.89E-06             | 0.271046           | -3.68941                     | T down vs N                            | 46.956  | 15.9622   | 5.43905    | 1         |
| cg22062383                                                                              | RHPN2                         | 4.05E-05          | 4.05E-05             | 0.312534           | -3.19966                     | T down vs N                            | 31.272  | 12.6693   | 6.48219    | 1         |
| cg22069247                                                                              | NMUR1                         | 7.64E-05          | 7.64E-05             | 0.28536            | -3.50435                     | T down vs N                            | 27.763  | 14.7285   | 8.48823    | 1         |
| cg22071194                                                                              | MOC53;DPM1                    | 0.00338945        | 0.00338945           | 0.296223           | -3.37583                     | T down vs N                            | 11.809  | 13.8639   | 18.7844    | 1         |
| cg22073121                                                                              | HEATR7B2                      | 2.89E-06          | 2.89E-06             | 0.202974           | -4.92675                     | T down vs N                            | 49.281  | 23.8182   | 7.73302    | 1         |
| cg22074858                                                                              | GBP3;GBP3                     | 0.00059861        | 0.000598613          | 0.260917           | -3.83264                     | T down vs N                            | 18.147  | 16.9072   | 14.9066    | 1         |
| cg22076311                                                                              | FOXP1                         | 6.15E-05          | 6.15E-05             | 0.178075           | -5.61561                     | T down vs N                            | 28.925  | 27.888    | 15.4264    | 1         |
| cg22077361                                                                              | FUCA1                         | 0.00286984        | 0.00286984           | 0.258527           | -3.86807                     | T down vs N                            | 12.357  | 17.1396   | 22.1931    | 1         |
| cg22078560                                                                              | DDX52;DDX52                   | 4.34E-05          | 4.34E-05             | 0.318171           | -3.14296                     | T down vs N                            | 30.869  | 12.2828   | 6.36645    | 1         |
| cg22079098                                                                              | WWC2                          | 0.00018925        | 0.000189249          | 0.29601            | -3.37826                     | T down vs N                            | 23.213  | 13.8804   | 9.56718    | 1         |
| cg22082267                                                                              | OR8K1                         | 0.00123879        | 0.00123879           | 0.276378           | -3.61823                     | T down vs N                            | 15.313  | 15.4893   | 16.1839    | 1         |
| cg22082868                                                                              | C11orf20                      | 0.00013621        | 0.000136211          | 5.80771            | 5.80771                      | T up vs N                              | 24.802  | 28.9858   | 18.699     | 1         |
| cg22084642                                                                              | DNAH1                         | 0.0003295         | 0.000329502          | 3.02514            | 3.02514                      | T up vs N                              | 20.681  | 11.4769   | 8.87935    | 1         |
| cg22086566                                                                              | SDK1                          | 0.00423219        | 0.00423219           | 0.19048            | -5.2499                      | T down vs N                            | 11.097  | 25.7537   | 37.134     | 1         |
| cg22087352                                                                              | ALKBH4                        | 0.00066087        | 0.000660869          | 0.295531           | -3.38374                     | T down vs N                            | 23.625  | 9.27821   | 3.92729    | 1         |
| cg22090245                                                                              | PCDH19;PCDH19                 | 0.00031862        | 0.000318624          | 3.90992            | 3.90992                      | T up vs N                              | 20.829  | 17.4134   | 13.3763    | 1         |
| cg22091236                                                                              | RPTOR;RPTOR                   | 2.47E-05          | 2.47E-05             | 0.320438           | -3.12073                     | T down vs N                            | 34.195  | 12.131    | 5.67607    | 1         |
| cg22092521                                                                              | CFD                           | 2.64E-05          | 2.64E-05             | 0.320739           | -3.1178                      | T down vs N                            | 33.794  | 12.111    | 5.73396    | 1         |
| cg22095041                                                                              | CHRNA3;CHRNA3                 | 7.79E-05          | 7.79E-05             | 0.323944           | -3.08695                     | T down vs N                            | 27.662  | 11.9001   | 6.88314    | 1         |
| cg22098115                                                                              | ARHGEF4;ARHGEF4               | 0.00696048        | 0.00696048           | 5.89772            | 5.89772                      | T up vs N                              | 9.5756  | 29.4948   | 49.2835    | 1         |
| cg22099241                                                                              | MICA                          | 0.00012641        | 0.000126409          | 0.201748           | -4.95667                     | T down vs N                            | 25.172  | 23.9994   | 15.2545    | 1         |
| cg22102078                                                                              | C6orf191                      | 0.00138248        | 0.00138248           | 0.245491           | -4.07348                     | T down vs N                            | 14.908  | 18.4758   | 19.8286    | 1         |
| cg22104242                                                                              | ELOVL7;ELOVL7                 | 0.00033838        | 0.000338382          | 5.46815            | 5.46815                      | T up vs N                              | 20.564  | 27.0345   | 21.0348    | 1         |
| cg22105162                                                                              | FBXL21                        | 0.00025688        | 0.000256876          | 0.279645           | -3.57596                     | T down vs N                            | 21.796  | 15.2076   | 11.1637    | 1         |
| cg22108292                                                                              | MYH3                          | 0.00399919        | 0.00399919           | 0.18894            | -5.29268                     | T down vs N                            | 11.276  | 26.0064   | 36.9009    | 1         |
| cg22109787                                                                              | RBM43                         | 0.00093439        | 0.000934386          | 0.284851           | -3.51061                     | T down vs N                            | 16.381  | 14.7705   | 14.4273    | 1         |
| cg22110158                                                                              | ST14                          | 1.02E-07          | 1.02E-07             | 0.183088           | -5.46187                     | T down vs N                            | 82.659  | 26.9979   | 5.22588    | 1         |
| cg22116670                                                                              | SPARC                         | 4.38E-06          | 4.38E-06             | 0.294071           | -3.40054                     | T down vs N                            | 46.034  | 14.0307   | 4.87666    | 1         |
| cg22119665                                                                              | ZDHHC8P                       | 0.00206464        | 0.00206464           | 3.75638            | 3.75638                      | T up vs N                              | 13.477  | 16.4052   | 19.4765    | 1         |
| cg22119676                                                                              | LOC285045                     | 0.00556755        | 0.00556755           | 0.30505            | -3.27815                     | T down vs N                            | 10.246  | 13.2029   | 20.6183    | 1         |
| cg22121570                                                                              | LOC145845                     | 0.00033661        | 0.000336606          | 0.216076           | -4.62799                     | T down vs N                            | 21.301  | 20.6928   | 14.5716    | 1         |
| cg22123774                                                                              | VPS25                         | 1.22E-05          | 1.22E-05             | 0.222149           | -4.50149                     | T down vs N                            | 38.739  | 21.1979   | 8.7552     | 1         |
| cg22124564                                                                              | AMZ1                          | 1.06E-05          | 1.06E-05             | 0.281896           | -3.5474                      | T down vs N                            | 39.667  | 15.0168   | 6.05711    | 1         |
| cg22124648                                                                              | FGR;FGR;FGR                   | 4.87E-05          | 4.87E-05             | 3.61962            | 3.61962                      | T up vs N                              | 30.221  | 15.4986   | 8.20537    | 1         |
| cg22124859                                                                              | LCE6A                         | 0.00278795        | 0.00278795           | 0.1824             | -5.48245                     | T down vs N                            | 12.453  | 27.1176   | 34.8408    | 1         |
| cg22125110                                                                              | RNF25                         | 0.00014701        | 0.000147011          | 0.319198           | -3.13285                     | T down vs N                            | 24.428  | 12.2138   | 8.00003    | 1         |
| cg22125754                                                                              | SLC29A2                       | 0.00040708        | 0.000407075          | 0.304868           | -3.28011                     | T down vs N                            | 19.761  | 13.2161   | 10.7006    | 1         |
| cg22128488                                                                              | DNALI1                        | 6.13E-06          | 6.13E-06             | 0.256735           | -3.89507                     | T down vs N                            | 46.061  | 16.2977   | 5.30739    | 1         |
| cg22128724                                                                              | TCF7L1                        | 0.00045602        | 0.000456018          | 0.257447           | -3.88429                     | T down vs N                            | 19.278  | 17.2458   | 14.3136    | 1         |
| cg22129111                                                                              | ALOXE3;ALOXE3                 | 1.10E-05          | 1.10E-05             | 0.294955           | -3.39034                     | T down vs N                            | 39.417  | 13.9619   | 5.66741    | 1         |
| cg22130067                                                                              | GYG2;GYG2                     | 0.0001855         | 0.000185499          | 0.275966           | -3.62364                     | T down vs N                            | 23.308  | 15.5254   | 10.6575    | 1         |
| cg22132788                                                                              | MYO1G                         | 0.00688614        | 0.00688614           | 6.5128             | 6.5128                       | T up vs N                              | 9.6073  | 32.8847   | 54.7662    | 1         |
| cg22135685                                                                              | FBXL17                        | 2.87E-07          | 2.87E-07             | 0.183425           | -5.45182                     | T down vs N                            | 70.771  | 26.9394   | 6.09046    | 1         |
| cg22136013                                                                              | HLA-DPB2                      | 0.00061547        | 0.000615471          | 0.149708           | -6.67966                     | T down vs N                            | 18.034  | 33.7786   | 29.9687    | 1         |
| cg22143766                                                                              | WNT5A                         | 4.86E-05          | 4.86E-05             | 0.083175           | -12.0229                     | T down vs N                            | 30.239  | 57.9226   | 30.6481    | 1         |
| cg22144328                                                                              | RNF222                        | 2.00E-05          | 2.00E-05             | 0.306635           | -3.26121                     | T down vs N                            | 35.501  | 13.0879   | 5.89859    | 1         |
| cg22146252                                                                              | KCNJ12                        | 0.00072727        | 0.000727269          | 3.1855             | 3.1855                       | T up vs N                              | 17.362  | 12.5729   | 11.5863    | 1         |
| cg22147262                                                                              | TNFAIP8L3                     | 0.00130716        | 0.00130716           | 0.332671           | -3.00597                     | T down vs N                            | 15.114  | 11.3454   | 12.0102    | 1         |
| GPR18;GPR18;UBAC2;GPR18;UBAC2;UBAC2;GPR18                                               |                               |                   |                      |                    |                              |                                        |         |           |            |           |
| cg22148297                                                                              | BAC2;GPR18                    | 0.00015341        | 0.000153412          | 0.17762            | -5.63001                     | T down vs N                            | 24.22   | 27.9708   | 18.4779    | 1         |
| cg22150051                                                                              | CSTT                          | 0.0048886         | 0.0048886            | 0.324127           | -3.08521                     | T down vs N                            | 10.645  | 11.8882   | 17.8683    | 1         |

| Probeset ID | UCSC_REFGENE_NAME                                                                                                                                                  | p-value<br>(Type) | p-value (T vs.<br>N) | Ratio (T<br>vs. N) | Fold-<br>Change (T<br>vs. N) | Fold-Change (T vs.<br>N) (Description) | F(Type) | SS (Type) | SS (Error) | F (Error) |
|-------------|--------------------------------------------------------------------------------------------------------------------------------------------------------------------|-------------------|----------------------|--------------------|------------------------------|----------------------------------------|---------|-----------|------------|-----------|
| cg22150440  | PCDHA7;PCDHA13;PCDHA12;PCDHA6;<br>PCDHA10;PCDHA4;PCDHA11;PCDHA8;<br>PCDHA1;PCDHA2;PCDHA6;PCDHA1                                                                    | 0.00024673        | 0.000246729          | 3.39645            | 3.39645                      | T up vs N                              | 21.98   | 14.003    | 10.1935    | 1         |
| cg22151446  | PCDHGA4;PCDHGA11;PCDHGA11;PCD<br>HGA9;PCDHGA1;PCDHGB1;PCDHGB6;<br>PCDHGA12;PCDHGB3;PCDHGB7;PCDH<br>PCDHA6;PCDHA2;PCDHA1;PCDHA1;PC<br>DHA6;PCDHA5;PCDHA3;PCDHA4;PCD | 0.00488074        | 0.00488074           | 4.25922            | 4.25922                      | T up vs N                              | 10.65   | 19.6675   | 29.5469    | 1         |
| cg22152229  | HA6                                                                                                                                                                | 1.22E-05          | 1.22E-05             | 3.65589            | 3.65589                      | T up vs N                              | 38.737  | 15.7398   | 6.50117    | 1         |
| cg22152605  | FPR1                                                                                                                                                               | 2.20E-06          | 2.20E-06             | 0.223387           | -4.47653                     | T down vs N                            | 51.509  | 21.0415   | 6.53608    | 1         |
| cg22154659  | HOXA1;HOXA1                                                                                                                                                        | 4.98E-06          | 4.98E-06             | 14.363             | 14.363                       | T up vs N                              | 45.07   | 66.5034   | 23.6089    | 1         |
| cg22154992  | RNF220                                                                                                                                                             | 0.00230484        | 0.00230484           | 3.7092             | 3.7092                       | T up vs N                              | 13.097  | 16.0933   | 19.6602    | 1         |
| cg22155405  | LOC284441                                                                                                                                                          | 8.25E-05          | 8.25E-05             | 0.160567           | -6.22793                     | T down vs N                            | 27.358  | 31.3336   | 18.3251    | 1         |
| cg22158648  | CABLES1                                                                                                                                                            | 4.72E-06          | 4.72E-06             | 0.273481           | -3.65656                     | T down vs N                            | 45.478  | 15.7443   | 5.5391     | 1         |
| cg22158769  | LOC375196;LOC100271715                                                                                                                                             | 0.00037696        | 0.000376957          | 44.1617            | 44.1617                      | T up vs N                              | 20.093  | 134.384   | 107.012    | 1         |
| cg22159815  | MIR29C                                                                                                                                                             | 2.37E-05          | 2.37E-05             | 0.230685           | -4.33492                     | T down vs N                            | 34.457  | 20.1486   | 9.35584    | 1         |
| cg22160073  | TRIM34;TRIM34;TRIM34;TRIM6-                                                                                                                                        |                   |                      |                    |                              |                                        |         |           |            |           |
| cg22161147  | TRIM34;TRIM34                                                                                                                                                      | 2.80E-06          | 2.80E-06             | 0.19472            | -5.13559                     | T down vs N                            | 49.532  | 25.0744   | 8.09962    | 1         |
| cg221621147 | AFAP1;AFAP1;LOC84740                                                                                                                                               | 0.00017352        | 0.000173515          | 0.198436           | -5.03941                     | T down vs N                            | 23.626  | 24.4984   | 16.5906    | 1         |
| cg22162422  | AFF3;AFF3                                                                                                                                                          | 0.00702487        | 0.00702487           | 0.308855           | -3.23777                     | T down vs N                            | 9.5484  | 12.9286   | 21.6642    | 1         |
| cg22163199  | MRPL55;MRPL55;MRPL55;MRPL55;M                                                                                                                                      |                   |                      |                    |                              |                                        |         |           |            |           |
| cg22163199  | MRPL55;MRPL55;MRPL55;MRPL55                                                                                                                                        | 0.00045416        | 0.000454159          | 0.265137           | -3.77163                     | T down vs N                            | 19.295  | 16.5058   | 13.6871    | 1         |
| cg22164577  | UBR3                                                                                                                                                               | 9.96E-05          | 9.96E-05             | 0.218791           | -4.57057                     | T down vs N                            | 26.378  | 21.6293   | 13.1197    | 1         |
| cg22164891  | ZNF217                                                                                                                                                             | 1.21E-05          | 1.21E-05             | 0.148676           | -6.72601                     | T down vs N                            | 38.788  | 34.0251   | 14.0354    | 1         |
| cg22165171  | PARP12                                                                                                                                                             | 3.96E-06          | 3.96E-06             | 0.289115           | -3.45883                     | T down vs N                            | 46.811  | 14.423    | 4.92978    | 1         |
| cg22165275  | KRTAP9-2                                                                                                                                                           | 1.64E-07          | 1.64E-07             | 0.114011           | -8.77105                     | T down vs N                            | 76.996  | 44.1636   | 9.17731    | 1         |
| cg22167400  | FLJ40504                                                                                                                                                           | 1.19E-06          | 1.19E-06             | 3.05562            | 3.05562                      | T up vs N                              | 56.813  | 11.6857   | 3.29103    | 1         |
| cg22168512  | MBP;MBP;MBP;MBP;MBP                                                                                                                                                | 3.91E-05          | 3.91E-05             | 3.96581            | 3.96581                      | T up vs N                              | 31.468  | 17.7778   | 9.03924    | 1         |
| cg22169053  | SPOCD1                                                                                                                                                             | 1.03E-05          | 1.03E-05             | 4.80185            | 4.80185                      | T up vs N                              | 39.894  | 23.0573   | 9.24754    | 1         |
| cg22169427  | UPK3B;UPK3B                                                                                                                                                        | 3.40E-05          | 3.40E-05             | 0.30468            | -3.28213                     | T down vs N                            | 32.291  | 13.2299   | 6.55543    | 1         |
| cg22174486  | HRAS;HRAS;LRRC56;HRAS                                                                                                                                              | 0.00088456        | 0.000884558          | 5.58344            | 5.58344                      | T up vs N                              | 16.593  | 27.7026   | 26.7132    | 1         |
| cg22175856  | SLC1A6                                                                                                                                                             | 4.99E-06          | 4.99E-06             | 0.161801           | -6.18042                     | T down vs N                            | 45.059  | 31.0717   | 11.0333    | 1         |
| cg22175873  | PCDHGA4;PCDHGA9;PCDHGA1;PCDHG<br>B1;PCDHGB6;PCDHGB3;PCDHGA11;PC                                                                                                    | 0.00028747        | 0.000287474          | 4.5364             | 4.5364                       | T up vs N                              | 21.287  | 21.4162   | 16.0969    | 1         |
| cg22178238  | PTPRN2;PTPRN2;PTPRN2                                                                                                                                               | 0.00038877        | 0.000388768          | 5.00818            | 5.00818                      | T up vs N                              | 19.959  | 24.3104   | 19.488     | 1         |
| cg22181664  | CLCA1                                                                                                                                                              | 0.0001802         | 0.000180195          | 0.264487           | -3.78091                     | T down vs N                            | 23.446  | 16.5669   | 11.3056    | 1         |
| cg22182945  | C4orf35                                                                                                                                                            | 0.00277122        | 0.00277122           | 0.204025           | -4.90137                     | T down vs N                            | 12.473  | 23.6641   | 30.3547    | 1         |
| cg22183016  | CD74;CD74;CD74                                                                                                                                                     | 0.00079842        | 0.000798416          | 0.326294           | -3.06472                     | T down vs N                            | 16.993  | 11.748    | 11.0615    | 1         |
| cg22186223  | CCL1                                                                                                                                                               | 9.76E-05          | 9.76E-05             | 0.224738           | -4.44963                     | T down vs N                            | 26.482  | 20.8726   | 12.611     | 1         |
| cg22186263  | CREB3L2                                                                                                                                                            | 5.47E-05          | 5.47E-05             | 0.230518           | -4.33807                     | T down vs N                            | 29.578  | 20.1686   | 10.9102    | 1         |
| cg22187733  | SIGLEC11;SIGLEC11                                                                                                                                                  | 0.00056522        | 0.000565216          | 0.322946           | -3.09649                     | T down vs N                            | 18.383  | 11.9654   | 10.4146    | 1         |
| cg22190114  | NLRP8;NLRP8                                                                                                                                                        | 0.00055274        | 0.000552739          | 0.296318           | -3.37475                     | T down vs N                            | 18.475  | 13.8567   | 12.0007    | 1         |
| cg22190721  | ESRP2                                                                                                                                                              | 9.24E-06          | 9.24E-06             | 5.4698             | 5.4698                       | T up vs N                              | 40.614  | 27.0441   | 10.654     | 1         |
| cg22193726  | PTPN11                                                                                                                                                             | 5.13E-06          | 5.13E-06             | 0.199192           | -5.02028                     | T down vs N                            | 44.842  | 24.3833   | 8.70009    | 1         |
| cg22193912  | MAFG;MAFG                                                                                                                                                          | 1.12E-05          | 1.12E-05             | 7.18779            | 7.18779                      | T up vs N                              | 39.313  | 36.4372   | 14.8297    | 1         |
| cg22197050  | LOC100132215                                                                                                                                                       | 0.00691691        | 0.00691691           | 3.96455            | 3.96455                      | T up vs N                              | 9.5941  | 17.7696   | 29.6341    | 1         |
| cg22197708  | MS4A2;MS4A2                                                                                                                                                        | 4.93E-05          | 4.93E-05             | 0.186657           | -5.35743                     | T down vs N                            | 30.151  | 26.3874   | 14.0029    | 1         |
| cg22199080  | AGAP2                                                                                                                                                              | 0.00069482        | 0.000694818          | 0.32069            | -3.3105                      | T down vs N                            | 17.545  | 13.4222   | 12.2405    | 1         |
| cg22199118  | C8orf34;C8orf34                                                                                                                                                    | 2.65E-05          | 2.65E-05             | 0.32735            | -3.05483                     | T down vs N                            | 33.779  | 11.6803   | 5.5326     | 1         |
| cg22200118  | OR52B4                                                                                                                                                             | 0.00073854        | 0.000738535          | 0.261234           | -3.82798                     | T down vs N                            | 17.301  | 16.8766   | 15.6073    | 1         |
| cg22200736  | KRT72;KRT72;KRT72                                                                                                                                                  | 0.00046653        | 0.000466527          | 3.91236            | 3.91236                      | T up vs N                              | 19.182  | 17.4293   | 14.5384    | 1         |
| cg22202357  | MICB                                                                                                                                                               | 0.00298124        | 0.00298124           | 0.317303           | -3.15156                     | T down vs N                            | 12.23   | 12.3415   | 16.1455    | 1         |
| cg22211154  | NRG4                                                                                                                                                               | 6.54E-06          | 6.54E-06             | 0.070035           | -14.2786                     | T down vs N                            | 43.064  | 66.2095   | 24.5998    | 1         |
| cg22211672  | CCDC33;CCDC33                                                                                                                                                      | 0.0001508         | 0.000150796          | 0.297731           | -3.35874                     | T down vs N                            | 24.304  | 13.7485   | 9.05118    | 1         |
| cg22212237  | C1QL4                                                                                                                                                              | 7.88E-06          | 7.88E-06             | 10.542             | 10.542                       | T up vs N                              | 41.727  | 51.9612   | 19.9242    | 1         |
| cg22212873  | CARTPT                                                                                                                                                             | 0.00017707        | 0.000177072          | 0.132472           | -7.54879                     | T down vs N                            | 23.529  | 38.2702   | 26.0239    | 1         |
| cg22215815  | NXP4                                                                                                                                                               | 0.00138214        | 0.00138214           | 5.07579            | 5.07579                      | T up vs N                              | 14.909  | 24.7167   | 26.525     | 1         |
| cg22219089  | FAM149A;FAM149A                                                                                                                                                    | 0.00059149        | 0.000591492          | 0.316438           | -3.16017                     | T down vs N                            | 18.196  | 12.4003   | 10.9036    | 1         |
| cg22222092  | BIVM;KDELC1;BIVM                                                                                                                                                   | 0.00017322        | 0.000173223          | 0.325425           | -3.07291                     | T down vs N                            | 23.634  | 11.804    | 7.99113    | 1         |
| cg22222281  | CD9                                                                                                                                                                | 0.00012271        | 0.000122712          | 4.80038            | 4.80038                      | T up vs N                              | 25.32   | 23.0483   | 14.5643    | 1         |
| cg22222461  | PGCP                                                                                                                                                               | 8.79E-05          | 8.79E-05             | 0.263935           | -3.78882                     | T down vs N                            | 27.022  | 16.619    | 9.84024    | 1         |
| cg22223402  | FAM55D;FAM55D                                                                                                                                                      | 0.00015503        | 0.000155028          | 0.292662           | -4.35422                     | T down vs N                            | 24.169  | 20.2709   | 13.4194    | 1         |
| cg22226532  | ATG9B                                                                                                                                                              | 0.00232338        | 0.00232338           | 0.290025           | -3.44797                     | T down vs N                            | 13.07   | 14.35     | 17.5674    | 1         |
| cg22227965  | LMO7                                                                                                                                                               | 0.00013499        | 0.000134985          | 0.221919           | -4.50615                     | T down vs N                            | 24.847  | 21.2271   | 13.6691    | 1         |
| cg22228134  | GZMH                                                                                                                                                               | 0.00034859        | 0.000348594          | 0.158826           | -6.29621                     | T down vs N                            | 20.433  | 31.7083   | 24.8288    | 1         |
| cg22228613  | PEX12                                                                                                                                                              | 0.00041521        | 0.000415208          | 0.291985           | -3.42483                     | T down vs N                            | 19.677  | 14.1943   | 11.5421    | 1         |
| cg22234930  | PKM2;PKM2;PKM2                                                                                                                                                     | 0.00634823        | 0.00634823           | 0.279724           | -3.57496                     | T down vs N                            | 9.8494  | 15.2009   | 24.6934    | 1         |

| Probeset ID | UCSC_REFGENE_NAME             | p-value<br>(Type) | p-value (T vs.<br>N) | Ratio (T<br>vs. N) | Fold-<br>Change (T<br>vs. N) | Fold-Change (T vs.<br>N) (Description) | F(Type) | SS (Type) | SS (Error) | F (Error) |
|-------------|-------------------------------|-------------------|----------------------|--------------------|------------------------------|----------------------------------------|---------|-----------|------------|-----------|
| cg22237014  | EP400                         | 2.55E-05          | 2.55E-05             | 0.227419           | -4.39717                     | T down vs N                            | 34.003  | 20.5423   | 9.6661     | 1         |
| cg22238692  | CST4                          | 3.79E-06          | 3.79E-06             | 0.203967           | -4.90276                     | T down vs N                            | 47.155  | 23.6726   | 8.03231    | 1         |
| cg22239334  | CNTD1;CCDC56                  | 6.61E-05          | 6.61E-05             | 0.295337           | -3.38596                     | T down vs N                            | 28.539  | 13.9323   | 7.81096    | 1         |
| cg22242216  | GRIN2D;GRWD1                  | 8.02E-06          | 8.02E-06             | 5.50493            | 5.50493                      | T up vs N                              | 41.605  | 27.2482   | 10.4788    | 1         |
| cg22242963  | TMEM143                       | 0.00270642        | 0.00270642           | 7.71201            | 7.71201                      | T up vs N                              | 12.553  | 39.0845   | 49.8185    | 1         |
| cg22244938  | OR6C6                         | 0.00362736        | 0.00362736           | 0.331914           | -3.01283                     | T down vs N                            | 11.589  | 11.3924   | 15.7286    | 1         |
| cg22247553  | KLF2                          | 0.00014462        | 0.000144616          | 0.234712           | -4.26055                     | T down vs N                            | 24.508  | 19.676    | 12.8455    | 1         |
| cg22249121  | HLA-DPA1                      | 0.00033621        | 0.000336214          | 0.303828           | -3.29134                     | T down vs N                            | 20.592  | 13.2923   | 10.3282    | 1         |
| cg22249529  | KLHDC7B                       | 0.00613476        | 0.00613476           | 3.1521             | 3.1521                       | T up vs N                              | 9.952   | 12.3452   | 19.8477    | 1         |
| cg22254135  | CCL16                         | 2.40E-08          | 2.40E-08             | 0.234224           | -4.26941                     | T down vs N                            | 101.96  | 19.7324   | 3.09661    | 1         |
| cg22254463  | EXPH5;EXPH5                   | 0.00103794        | 0.00103794           | 0.1576             | -6.34518                     | T down vs N                            | 15.978  | 31.9759   | 32.0194    | 1         |
| cg22255773  | DPP6;DPP6;DPP6                | 0.00015904        | 0.000159036          | 0.194919           | -5.13033                     | T down vs N                            | 24.045  | 25.043    | 16.6639    | 1         |
| cg22260869  | SLCO3A1;SLCO3A1               | 4.96E-05          | 4.96E-05             | 3.42337            | 3.42337                      | T up vs N                              | 30.116  | 14.1845   | 7.53586    | 1         |
| cg22262544  | MIR508                        | 0.00205115        | 0.00205115           | 0.228338           | -4.37947                     | T down vs N                            | 13.5    | 20.4305   | 24.2144    | 1         |
| cg22265294  | NCOR2;NCOR2                   | 5.43E-05          | 5.43E-05             | 0.307169           | -3.25554                     | T down vs N                            | 29.613  | 13.0493   | 7.05055    | 1         |
| cg22268510  | PRRT1                         | 5.53E-05          | 5.53E-05             | 12.9546            | 12.9546                      | T up vs N                              | 29.517  | 61.4517   | 33.3111    | 1         |
| cg22271457  | EXT1                          | 0.00516673        | 0.00516673           | 0.322707           | -3.09878                     | T down vs N                            | 10.474  | 11.981    | 18.3016    | 1         |
| cg22272282  | HIST1H2BK                     | 0.00416855        | 0.00416855           | 0.285926           | -3.49741                     | T down vs N                            | 11.145  | 14.6821   | 21.0788    | 1         |
| cg22273939  | LOC284798;LOC284798;LOC284798 | 0.00022616        | 0.000226155          | 5.71884            | 5.71884                      | T up vs N                              | 22.38   | 28.4799   | 20.361     | 1         |
| cg22280671  | EFHA1                         | 0.00068333        | 0.000683329          | 0.291578           | -3.42962                     | T down vs N                            | 17.612  | 14.2265   | 12.9248    | 1         |
| cg22281638  | IHH                           | 0.00172072        | 0.00172072           | 0.255321           | -3.91664                     | T down vs N                            | 14.118  | 17.4573   | 19.7845    | 1         |
| cg22282941  | HLA-DQA2                      | 0.00042753        | 0.000427531          | 0.276069           | -3.62229                     | T down vs N                            | 19.552  | 15.5164   | 12.6978    | 1         |
| cg22284043  | GPC5                          | 0.00121663        | 0.00121663           | 18.1049            | 18.1049                      | T up vs N                              | 15.381  | 78.5621   | 81.7267    | 1         |
| cg22285878  | KLF14                         | 0.00493835        | 0.00493835           | 5.89942            | 5.89942                      | T up vs N                              | 10.838  | 27.7689   | 38.4331    | 1         |
| cg22288982  | SA4A                          | 0.00021997        | 0.000219973          | 0.247686           | -4.03737                     | T down vs N                            | 22.508  | 18.2423   | 12.9675    | 1         |
| cg22291265  | SHANK1                        | 7.91E-05          | 7.91E-05             | 0.3288             | -3.04136                     | T down vs N                            | 27.575  | 11.588    | 6.7238     | 1         |
| cg22293140  | ANXA2;ANXA2;ANXA2;ANXA2       | 0.00229463        | 0.00229463           | 15.5014            | 15.5014                      | T up vs N                              | 13.112  | 70.3651   | 85.8611    | 1         |
| cg22294773  | GNG7                          | 3.72E-07          | 3.72E-07             | 0.203738           | -4.90827                     | T down vs N                            | 68.037  | 23.706    | 5.57482    | 1         |
| cg22295787  | ADRA1A;ADRA1A;ADRA1A;ADRA1A   | 0.00097629        | 0.000976292          | 29.6686            | 29.6686                      | T up vs N                              | 16.212  | 107.643   | 106.235    | 1         |
| cg22296612  | JARID2                        | 1.49E-06          | 1.49E-06             | 0.328551           | -3.04367                     | T down vs N                            | 54.852  | 11.6038   | 3.38477    | 1         |
| cg22298860  | HLA-F;HLA-F;HLA-F             | 9.89E-06          | 9.89E-06             | 0.282174           | -3.54392                     | T down vs N                            | 40.147  | 14.9935   | 5.97546    | 1         |
| cg22299097  | MINA;MINA;MINA                | 0.00128574        | 0.00128574           | 0.227738           | -4.39102                     | T down vs N                            | 15.175  | 20.5035   | 21.6176    | 1         |
| cg22303909  | FIGNL1;FIGNL1                 | 5.24E-05          | 5.24E-05             | 0.328703           | -3.04226                     | T down vs N                            | 29.811  | 11.5942   | 6.22274    | 1         |
| cg22304399  | CACNA1A;CACNA1A               | 3.34E-06          | 3.34E-06             | 0.131387           | -7.6111                      | T down vs N                            | 48.149  | 38.5821   | 12.8209    | 1         |
| cg22304522  | ADCY8                         | 0.00286221        | 0.00286221           | 0.307483           | -3.25221                     | T down vs N                            | 12.366  | 13.0267   | 16.8555    | 1         |
| cg22306928  | MIR375                        | 0.00153241        | 0.00153241           | 5.24493            | 5.24493                      | T up vs N                              | 14.534  | 25.7243   | 28.3196    | 1         |
| cg22307444  | ERICH1                        | 1.47E-05          | 1.47E-05             | 0.106037           | -9.43066                     | T down vs N                            | 37.467  | 47.1622   | 20.14      | 1         |
| cg22311510  | MS4A4A;MS4A4A;MS4A4A          | 8.39E-05          | 8.39E-05             | 0.216463           | -4.61973                     | T down vs N                            | 27.269  | 21.9349   | 12.8702    | 1         |
| cg22315453  | TFAP2A;TFAP2A;TFAP2A          | 9.76E-05          | 9.76E-05             | 0.241626           | -4.13863                     | T down vs N                            | 26.482  | 18.8956   | 11.4164    | 1         |
| cg22315746  | PHRF1                         | 0.00161732        | 0.00161732           | 3.93357            | 3.93357                      | T up vs N                              | 14.34   | 17.5677   | 19.6021    | 1         |
| cg22321671  | TNXB;TNXB                     | 9.64E-07          | 9.64E-07             | 0.299486           | -3.33905                     | T down vs N                            | 58.729  | 13.6154   | 3.70933    | 1         |
| cg22324029  | HLA-DMB                       | 0.00144162        | 0.00144162           | 0.249932           | -4.00108                     | T down vs N                            | 15.156  | 16.9478   | 16.7738    | 1         |
| cg22325828  | LOC90586                      | 7.62E-05          | 7.62E-05             | 0.279459           | -3.57835                     | T down vs N                            | 27.773  | 15.2235   | 8.77018    | 1         |
| cg22327802  | SEH1L;SEH1L                   | 0.00269356        | 0.00269356           | 0.290325           | -3.44441                     | T down vs N                            | 12.569  | 14.3261   | 18.2373    | 1         |
| cg22328208  | TSPYL5                        | 0.00174373        | 0.00174373           | 4.60915            | 4.60915                      | T up vs N                              | 14.071  | 21.8692   | 24.8678    | 1         |
| cg22329286  | F2                            | 0.00566834        | 0.00566834           | 0.268313           | -3.72699                     | T down vs N                            | 10.191  | 16.211    | 25.4516    | 1         |
| cg22331032  | NLRP6                         | 7.19E-05          | 7.19E-05             | 0.299103           | -3.34333                     | T down vs N                            | 28.085  | 13.6443   | 7.77315    | 1         |
| cg22332722  | CDH2                          | 0.00400071        | 0.00400071           | 0.290774           | -3.4391                      | T down vs N                            | 11.275  | 14.2903   | 20.279     | 1         |
| cg22334879  | MYO1F                         | 3.48E-07          | 3.48E-07             | 0.14913            | -6.70556                     | T down vs N                            | 68.746  | 33.9164   | 7.89377    | 1         |
| cg22336806  | SERPINB9                      | 1.89E-06          | 1.89E-06             | 8.21445            | 8.21445                      | T up vs N                              | 52.777  | 41.537    | 12.5924    | 1         |
| cg22338127  | IRF6                          | 0.00087451        | 0.00087451           | 6.47246            | 6.47246                      | T up vs N                              | 16.637  | 32.667    | 31.4162    | 1         |
| cg22338152  | USP29                         | 0.00013561        | 0.000135606          | 0.221094           | -4.52295                     | T down vs N                            | 24.824  | 21.3322   | 13.7494    | 1         |
| cg22339338  | TAGLN2                        | 1.17E-05          | 1.17E-05             | 0.197536           | -5.06236                     | T down vs N                            | 39.028  | 24.6362   | 10.0999    | 1         |
| cg22343083  | RGS20                         | 0.00182585        | 0.00182585           | 0.240598           | -4.15632                     | T down vs N                            | 13.908  | 19.0093   | 21.8691    | 1         |
| cg22344122  | RHOD                          | 7.34E-06          | 7.34E-06             | 6.53201            | 6.53201                      | T up vs N                              | 42.231  | 32.9882   | 12.4983    | 1         |
| cg22344727  | MYF6                          | 0.00351765        | 0.00351765           | 4.31905            | 4.31905                      | T up vs N                              | 11.688  | 20.048    | 27.4434    | 1         |
| cg22345428  | PRDM10;PRDM10;PRDM10;PRDM10   | 4.24E-05          | 4.24E-05             | 0.252449           | -3.9612                      | T down vs N                            | 31.006  | 17.7477   | 9.15828    | 1         |
| cg22346380  | VRK2;VRK2;VRK2;VRK2;VRK2      | 3.35E-06          | 3.35E-06             | 0.255034           | -3.92104                     | T down vs N                            | 48.111  | 17.486    | 5.81519    | 1         |
| cg22346461  | LAMC2;LAMC2                   | 0.0019314         | 0.0019314            | 4.67586            | 4.67586                      | T up vs N                              | 13.71   | 22.2825   | 26.0046    | 1         |
| cg22347212  | FZD10                         | 0.00010994        | 0.000109941          | 5.77119            | 5.77119                      | T up vs N                              | 25.874  | 28.7783   | 17.7963    | 1         |
| cg22348001  | SLC22A12;SLC22A12             | 0.00427863        | 0.00427863           | 0.253972           | -3.93744                     | T down vs N                            | 11.062  | 17.5929   | 25.4461    | 1         |
| cg22348654  | C1orf170                      | 5.23E-05          | 5.23E-05             | 0.173337           | -5.76911                     | T down vs N                            | 29.819  | 28.7665   | 15.4354    | 1         |
| cg22350578  | NLE1;NLE1                     | 0.00077229        | 0.000772289          | 0.279361           | -3.5796                      | T down vs N                            | 17.124  | 15.2318   | 14.2319    | 1         |
| cg22350872  | GRB7;GRB7                     | 0.00516136        | 0.00516136           | 0.266262           | -3.7557                      | T down vs N                            | 10.478  | 16.4007   | 25.0452    | 1         |
| cg22352800  | MIR10B                        | 0.00028892        | 0.000288921          | 4.10467            | 4.10467                      | T up vs N                              | 21.265  | 18.677    | 14.053     | 1         |
| cg22354132  | C1orf177;C1orf177             | 1.17E-06          | 1.17E-06             | 0.19329            | -5.17357                     | T down vs N                            | 56.947  | 25.3008   | 7.10859    | 1         |
| cg22354363  | FGF19                         | 9.38E-05          | 9.38E-05             | 0.26778            | -3.73441                     | T down vs N                            | 26.687  | 16.2601   | 9.74868    | 1         |
| cg22354782  | NGF                           | 0.00143841        | 0.00143841           | 7.35142            | 7.35142                      | T up vs N                              | 14.764  | 37.2736   | 40.3955    | 1         |
| cg22355506  | RAX2                          | 3.16E-05          | 3.16E-05             | 0.277276           | -3.60651                     | T down vs N                            | 32.727  | 15.4113   | 7.5345     | 1         |

| Probeset ID | UCSC_REFGENE_NAME                                                           | p-value<br>(Type) | p-value (T vs.<br>N) | Ratio (T<br>vs. N) | Fold-<br>Change (T<br>vs. N) | Fold-Change (T vs.<br>N) (Description) | F(Type) | SS (Type) | SS (Error) | F (Error) |
|-------------|-----------------------------------------------------------------------------|-------------------|----------------------|--------------------|------------------------------|----------------------------------------|---------|-----------|------------|-----------|
| cg22357164  | RNF213;RNF213                                                               | 1.87E-06          | 1.87E-06             | 0.161735           | -6.18294                     | T down vs N                            | 52.888  | 31.0857   | 9.4043     | 1         |
| cg22358121  | TRAPPC4<br>RAB34;RAB34;RAB34;RAB34;RAB34;R                                  | 4.94E-05          | 4.94E-05             | 0.329691           | -3.03315                     | T down vs N                            | 30.139  | 11.5317   | 6.12194    | 1         |
| cg22359162  | AB34;RAB34                                                                  | 0.00024901        | 0.000249009          | 0.288875           | -3.46171                     | T down vs N                            | 21.938  | 14.4424   | 10.5335    | 1         |
| cg22363301  | C12orf54                                                                    | 0.00398447        | 0.00398447           | 0.317577           | -3.14885                     | T down vs N                            | 11.288  | 12.323    | 17.4671    | 1         |
| cg22365167  | AHNAK;AHNAK                                                                 | 0.00010375        | 0.000103753          | 0.171806           | -5.82052                     | T down vs N                            | 26.168  | 29.0585   | 17.7671    | 1         |
| cg22366350  | PTGES3<br>SNORD115-15;SNORD115-                                             | 8.89E-06          | 8.89E-06             | 12.9341            | 12.9341                      | T up vs N                              | 40.882  | 61.3755   | 24.0203    | 1         |
| cg22366938  | 21;PAR4;SNORD115-23<br>DISC1;DISC1;DISC1;DISC1;DISC1;DISC1<br>;DISC1;TSNAX- | 0.00030606        | 0.000306063          | 0.272086           | -3.6753                      | T down vs N                            | 21.007  | 15.8687   | 12.0862    | 1         |
| cg22367981  | DISC1;DISC1;DISC1;DISC1;DISC1                                               | 2.58E-05          | 2.58E-05             | 0.327904           | -3.04967                     | T down vs N                            | 35.617  | 10.96     | 4.61577    | 1         |
| cg22368476  | OR6T1<br>ATP6V1G2;NFKBIL1;NFKBIL1;NFKBIL1;                                  | 5.09E-06          | 5.09E-06             | 0.120822           | -8.27665                     | T down vs N                            | 44.9    | 41.8351   | 14.908     | 1         |
| cg22369037  | ATP6V1G2;NFKBIL1                                                            | 8.97E-05          | 8.97E-05             | 0.12388            | -8.07236                     | T down vs N                            | 26.919  | 40.8515   | 24.2813    | 1         |
| cg22373079  | SPRED2;SPRED2                                                               | 0.00516721        | 0.00516721           | 0.212632           | -4.70297                     | T down vs N                            | 12.685  | 14.9665   | 11.7984    | 1         |
| cg22376805  | PROX1                                                                       | 0.00130214        | 0.00130214           | 0.25818            | -3.87326                     | T down vs N                            | 15.129  | 17.1736   | 18.1628    | 1         |
| cg22379576  | CENPL;CENPL;CENPL                                                           | 0.00041082        | 0.000410815          | 0.240385           | -4.16                        | T down vs N                            | 19.722  | 19.0329   | 15.4409    | 1         |
| cg22379905  | MRPL51                                                                      | 0.00093644        | 0.000936435          | 0.289801           | -3.45064                     | T down vs N                            | 16.372  | 14.368    | 14.0414    | 1         |
| cg22381248  | HIVEP3;HIVEP3                                                               | 0.00132233        | 0.00132233           | 0.237781           | -4.20556                     | T down vs N                            | 15.072  | 19.3249   | 20.515     | 1         |
| cg22382137  | CSDE1;CSDE1;CSDE1                                                           | 0.00018751        | 0.000187509          | 0.256141           | -3.9041                      | T down vs N                            | 23.257  | 17.3753   | 11.9536    | 1         |
| cg22382235  | OR8U8;OR9G9;OR9G1                                                           | 4.24E-05          | 4.24E-05             | 0.153324           | -6.52213                     | T down vs N                            | 31.007  | 32.935    | 16.9951    | 1         |
| cg22387369  | ALPK3                                                                       | 1.89E-05          | 1.89E-05             | 43.4942            | 43.4942                      | T up vs N                              | 35.874  | 133.306   | 59.4545    | 1         |
| cg22387575  | ETV7                                                                        | 3.24E-06          | 3.24E-06             | 0.281959           | -3.54662                     | T down vs N                            | 48.384  | 15.0115   | 4.96415    | 1         |
| cg22388607  | PRDM16;PRDM16                                                               | 2.90E-06          | 2.90E-06             | 6.91169            | 6.91169                      | T up vs N                              | 49.261  | 35.0043   | 11.3694    | 1         |
| cg22388634  | VSX1                                                                        | 0.00172364        | 0.00172364           | 15.9242            | 15.9242                      | T up vs N                              | 14.112  | 71.7535   | 81.3536    | 1         |
| cg22388948  | FAM46A                                                                      | 4.10E-05          | 4.10E-05             | 0.136183           | -7.34306                     | T down vs N                            | 31.195  | 37.2311   | 19.0959    | 1         |
| cg22389215  | PSMC2                                                                       | 0.00221167        | 0.00221167           | 0.234997           | -4.25538                     | T down vs N                            | 13.239  | 19.6431   | 23.7398    | 1         |
| cg22390041  | ALDH4A1;ALDH4A1                                                             | 0.00185366        | 0.00185366           | 0.285732           | -3.49978                     | T down vs N                            | 13.854  | 14.6979   | 16.9743    | 1         |
| cg22395765  | PTPRN2;PTPRN2;PTPRN2                                                        | 0.00052051        | 0.000520514          | 0.244437           | -4.09104                     | T down vs N                            | 18.723  | 18.5892   | 15.8855    | 1         |
| cg22396288  | ARR3                                                                        | 0.00011606        | 0.000116061          | 0.324636           | -3.08037                     | T down vs N                            | 25.6    | 11.8551   | 7.40947    | 1         |
| cg22400420  | RGL1                                                                        | 1.15E-05          | 1.15E-05             | 0.208552           | -4.79498                     | T down vs N                            | 39.145  | 23.0152   | 9.40714    | 1         |
| cg22402753  | OR9G4                                                                       | 3.83E-06          | 3.83E-06             | 0.18767            | -5.3285                      | T down vs N                            | 47.064  | 26.2174   | 8.91286    | 1         |
| cg22404125  | TSPAN5                                                                      | 1.42E-05          | 1.42E-05             | 0.332842           | -3.00443                     | T down vs N                            | 37.728  | 11.3349   | 4.80695    | 1         |
| cg22405653  | KRTAP21-1                                                                   | 1.47E-06          | 1.47E-06             | 0.161949           | -6.17479                     | T down vs N                            | 54.952  | 31.0407   | 9.03795    | 1         |
| cg22409504  | ABCF1;ABCF1                                                                 | 0.00139012        | 0.00139012           | 0.291072           | -3.43558                     | T down vs N                            | 14.888  | 14.2667   | 15.332     | 1         |
| cg22412481  | KIF23;KIF23                                                                 | 0.00469053        | 0.00469053           | 0.324401           | -3.08261                     | T down vs N                            | 10.774  | 11.8704   | 17.6286    | 1         |
| cg22413399  | TRIM48                                                                      | 5.82E-06          | 5.82E-06             | 0.18526            | -5.39781                     | T down vs N                            | 43.915  | 26.624    | 9.70015    | 1         |
| cg22416916  | SLC22A1;SLC22A1                                                             | 0.000288          | 0.000288001          | 0.141679           | -7.05819                     | T down vs N                            | 21.279  | 35.768    | 26.8944    | 1         |
| cg22422090  | KLHL3                                                                       | 0.00379           | 0.00379              | 0.285221           | -3.50605                     | T down vs N                            | 11.448  | 14.7399   | 20.601     | 1         |
| cg22427279  | NHLH2;NHLH2                                                                 | 0.00433367        | 0.00433367           | 0.284495           | -3.515                       | T down vs N                            | 11.022  | 14.7999   | 21.4846    | 1         |
| cg22430985  | AFAP1;AFAP1                                                                 | 4.05E-05          | 4.05E-05             | 0.329326           | -3.03651                     | T down vs N                            | 31.276  | 11.5548   | 5.91121    | 1         |
| cg22439241  | RNF160                                                                      | 8.95E-05          | 8.95E-05             | 0.24651            | -4.05663                     | T down vs N                            | 26.929  | 18.3669   | 10.9127    | 1         |
| cg22439792  | BCAN;BCAN                                                                   | 7.57E-05          | 7.57E-05             | 0.193417           | -5.17018                     | T down vs N                            | 27.81   | 25.2806   | 14.545     | 1         |
| cg22441157  | IGSF9;IGSF9                                                                 | 6.59E-05          | 6.59E-05             | 0.313599           | -3.18878                     | T down vs N                            | 28.554  | 12.5953   | 7.05769    | 1         |
| cg22442168  | ZNF236                                                                      | 0.00686586        | 0.00686586           | 3.10065            | 3.10065                      | T up vs N                              | 9.616   | 11.9938   | 19.9563    | 1         |
| cg22442454  | IRF6;IRF6                                                                   | 0.00632066        | 0.00632066           | 39.007             | 39.007                       | T up vs N                              | 10.059  | 118.326   | 176.447    | 1         |
| cg22443249  | KRTAP2-2                                                                    | 0.00324742        | 0.00324742           | 0.312678           | -3.19818                     | T down vs N                            | 11.949  | 12.6593   | 16.9516    | 1         |
| cg22445712  | PLXNB2                                                                      | 1.65E-06          | 1.65E-06             | 5.81956            | 5.81956                      | T up vs N                              | 53.95   | 29.053    | 8.61635    | 1         |
| cg22448232  | PTGFRN                                                                      | 3.45E-05          | 3.45E-05             | 0.260229           | -3.84277                     | T down vs N                            | 32.196  | 16.9737   | 8.43511    | 1         |
| cg22449745  | CDC48;C1orf109                                                              | 7.27E-05          | 7.27E-05             | 0.327106           | -3.05711                     | T down vs N                            | 28.024  | 11.6959   | 6.67771    | 1         |
| cg22449901  | PEX19;PEX19                                                                 | 0.00181869        | 0.00181869           | 0.249473           | -4.00845                     | T down vs N                            | 13.922  | 18.0549   | 20.7504    | 1         |
| cg22451002  | TKTL1;TEX28;TKTL1                                                           | 0.00021034        | 0.000210335          | 0.157676           | -6.3421                      | T down vs N                            | 22.717  | 31.9591   | 22.5095    | 1         |
| cg22451923  | BTNL2                                                                       | 8.51E-05          | 8.51E-05             | 0.179383           | -5.57465                     | T down vs N                            | 27.195  | 27.6518   | 16.2687    | 1         |
| cg22453033  | ZNF679                                                                      | 8.13E-05          | 8.13E-05             | 0.302756           | -3.30299                     | T down vs N                            | 27.431  | 13.3713   | 7.7991     | 1         |
| cg22454022  | C8orf34                                                                     | 0.00069985        | 0.000699845          | 0.291542           | -3.43004                     | T down vs N                            | 17.516  | 14.2294   | 12.998     | 1         |
| cg22454474  | PPP1R2P1                                                                    | 1.28E-05          | 1.28E-05             | 0.189634           | -5.27332                     | T down vs N                            | 38.391  | 25.8922   | 10.791     | 1         |
| cg22455250  | LLGL2;LLGL2;LLGL2                                                           | 4.55E-05          | 4.55E-05             | 0.121287           | -8.24489                     | T down vs N                            | 30.607  | 41.683    | 21.7904    | 1         |
| cg22456162  | RUNX2;RUNX2                                                                 | 0.00045657        | 0.000456569          | 3.25473            | 3.25473                      | T up vs N                              | 19.273  | 13.0439   | 10.8289    | 1         |
| cg22457172  | DNAH10                                                                      | 2.43E-05          | 2.43E-05             | 0.239847           | -4.16932                     | T down vs N                            | 34.306  | 19.0927   | 8.90459    | 1         |
| cg22457503  | MIR517B;MIR520D                                                             | 6.61E-05          | 6.61E-05             | 0.287749           | -3.47526                     | T down vs N                            | 28.536  | 14.5334   | 8.14879    | 1         |
| cg22459630  | LBXCOR1                                                                     | 0.00046833        | 0.000468328          | 12.7798            | 12.7798                      | T up vs N                              | 19.165  | 60.8017   | 50.7597    | 1         |
| cg22460366  | C20orf107                                                                   | 0.00029045        | 0.000290446          | 0.269298           | -3.71336                     | T down vs N                            | 21.241  | 16.1208   | 12.1431    | 1         |
| cg22461835  | ADRA1A;ADRA1A;ADRA1A;ADRA1A                                                 | 0.00097444        | 0.000974437          | 9.48777            | 9.48777                      | T up vs N                              | 16.219  | 47.4163   | 46.7752    | 1         |
| cg22462109  | NMNAT3                                                                      | 6.77E-07          | 6.77E-07             | 0.170802           | -5.85473                     | T down vs N                            | 62.061  | 29.2521   | 7.5415     | 1         |
| cg22462235  | LEFTY2                                                                      | 2.42E-05          | 2.42E-05             | 0.158303           | -6.31699                     | T down vs N                            | 34.335  | 31.822    | 14.8291    | 1         |
| cg22462714  | SLC38A10                                                                    | 0.00687514        | 0.00687514           | 0.323073           | -3.09527                     | T down vs N                            | 9.612   | 11.957    | 19.9034    | 1         |
| cg22464105  | KCNIP1                                                                      | 0.00196905        | 0.00196905           | 3.0839             | 3.0839                       | T up vs N                              | 13.642  | 11.8793   | 13.9323    | 1         |
| cg22464200  | NAALADL2                                                                    | 0.001901          | 0.001901             | 0.326508           | -3.06271                     | T down vs N                            | 13.766  | 11.7343   | 13.639     | 1         |
| cg22466653  | OR4D1                                                                       | 0.00044992        | 0.000449916          | 0.249247           | -4.01209                     | T down vs N                            | 19.335  | 18.0784   | 14.9604    | 1         |

| Probeset ID | UCSC_REFGENE_NAME                                                  | p-value<br>(Type) | p-value (T vs.<br>N) | Ratio (T<br>vs. N) | Fold-<br>Change (T<br>vs. N) | Fold-Change (T vs. N) (Description) | F(Type) | SS (Type) | SS (Error) | F (Error) |
|-------------|--------------------------------------------------------------------|-------------------|----------------------|--------------------|------------------------------|-------------------------------------|---------|-----------|------------|-----------|
|             | LOC729991-MEF2B;LOC729991-                                         |                   |                      |                    |                              |                                     |         |           |            |           |
| cg22470465  | MEF2B;MEF2B;LOC729991-MEF2B                                        | 0.00075691        | 0.000756912          | 0.283145           | -3.53176                     | T down vs N                         | 17.204  | 14.9122   | 13.8688    | 1         |
| cg22471401  | HTR3E                                                              | 9.53E-06          | 9.53E-06             | 0.237097           | -4.21768                     | T down vs N                         | 40.404  | 19.4024   | 7.68339    | 1         |
| cg22472023  | SULT2A1;SULT2A1                                                    | 4.38E-06          | 4.38E-06             | 0.196549           | -5.08779                     | T down vs N                         | 46.037  | 24.7887   | 8.6153     | 1         |
| cg22472488  | DNAH10                                                             | 5.60E-05          | 5.60E-05             | 0.30362            | -3.29359                     | T down vs N                         | 29.445  | 13.3075   | 7.23111    | 1         |
| cg22476027  | NR2E1                                                              | 2.41E-06          | 2.41E-06             | 0.110261           | -9.06938                     | T down vs N                         | 50.765  | 45.5345   | 13.3515    | 1         |
| cg22476848  | MEI1                                                               | 0.00106001        | 0.00106001           | 3.25378            | 3.25378                      | T up vs N                           | 15.898  | 13.0374   | 13.1208    | 1         |
| cg22477971  | CIQB                                                               | 0.00230259        | 0.00230259           | 0.299134           | -3.34298                     | T down vs N                         | 13.101  | 13.642    | 16.6614    | 1         |
| cg22481632  | CD93;CD93                                                          | 3.86E-08          | 3.86E-08             | 0.192127           | -5.2049                      | T down vs N                         | 95.228  | 25.487    | 4.28227    | 1         |
| cg22486000  | ZMYND12;ZMYND12                                                    | 0.0003133         | 0.000313299          | 0.28072            | -3.56226                     | T down vs N                         | 20.904  | 15.1161   | 11.5702    | 1         |
| cg22488857  | ACHE;ACHE                                                          | 0.00353902        | 0.00353902           | 3.75813            | 3.75813                      | T up vs N                           | 11.669  | 16.4167   | 22.5104    | 1         |
| cg22490229  | OR2M2                                                              | 0.00035809        | 0.000358087          | 0.322467           | -3.1011                      | T down vs N                         | 20.316  | 11.9968   | 9.44827    | 1         |
| cg22493372  | LAT2;LAT2;LAT2                                                     | 3.98E-06          | 3.98E-06             | 0.193789           | -5.16026                     | T down vs N                         | 46.772  | 25.2216   | 8.62796    | 1         |
| cg22494858  | ALX3                                                               | 0.007017          | 0.007017             | 3.97995            | 3.97995                      | T up vs N                           | 9.5517  | 17.8698   | 29.9336    | 1         |
| cg22495211  | LOC650226                                                          | 0.00019221        | 0.000192205          | 0.171606           | -5.82732                     | T down vs N                         | 23.14   | 29.097    | 20.1189    | 1         |
| cg22498143  | SPTBN4                                                             | 0.00333104        | 0.00333104           | 3.00007            | 3.00007                      | T up vs N                           | 11.866  | 11.3049   | 15.244     | 1         |
| cg22498784  | KRTDAP                                                             | 0.00221727        | 0.00221727           | 0.328197           | -3.04695                     | T down vs N                         | 13.23   | 11.6263   | 14.0604    | 1         |
| cg22499572  | C6orf10                                                            | 1.44E-05          | 1.44E-05             | 0.287261           | -3.48115                     | T down vs N                         | 37.629  | 14.573    | 6.19644    | 1         |
| cg22501998  | C1orf109                                                           | 0.00131053        | 0.00131053           | 0.141867           | -7.04885                     | T down vs N                         | 15.522  | 33.6184   | 32.4882    | 1         |
| cg22505898  | AGAP2                                                              | 0.00071123        | 0.00071123           | 0.330519           | -3.02554                     | T down vs N                         | 17.451  | 11.4796   | 10.5249    | 1         |
| cg22505977  | SLC36A2                                                            | 0.00412975        | 0.00412975           | 0.269295           | -3.7134                      | T down vs N                         | 11.174  | 16.1211   | 23.0835    | 1         |
| cg22506453  | KRT39                                                              | 0.00423344        | 0.00423344           | 0.290521           | -3.44209                     | T down vs N                         | 11.096  | 14.3105   | 20.6359    | 1         |
| cg22509205  | FCGBP                                                              | 0.00045409        | 0.000454094          | 0.215985           | -4.62995                     | T down vs N                         | 19.296  | 21.9983   | 18.241     | 1         |
|             | CACNA1G;CACNA1G;CACNA1G;CACNA1G;CACNA1G;CACNA1G;CACNA1G;CACNA1G;CA |                   |                      |                    |                              |                                     |         |           |            |           |
| cg22509384  | CNA1G;CACNA1G;CACNA1G;CACNA1G                                      | 0.00209815        | 0.00209815           | 0.236843           | -4.2222                      | T down vs N                         | 13.421  | 19.4313   | 23.1652    | 1         |
| cg22510636  | HTN3                                                               | 0.00046755        | 0.000467548          | 0.182693           | -5.47366                     | T down vs N                         | 19.172  | 27.0665   | 22.588     | 1         |
| cg22511368  | KIR2DL1;KIR3DP1                                                    | 1.63E-05          | 1.63E-05             | 0.228729           | -4.37199                     | T down vs N                         | 36.833  | 20.3833   | 8.85435    | 1         |
| cg22511808  | GFM1                                                               | 7.81E-06          | 7.81E-06             | 0.215623           | -4.63773                     | T down vs N                         | 41.792  | 22.0465   | 8.44041    | 1         |
| cg22512438  | TRH;TRH                                                            | 7.24E-05          | 7.24E-05             | 21.4639            | 21.4639                      | T up vs N                           | 28.05   | 88.0667   | 50.2337    | 1         |
| cg22513901  | SLC8A2                                                             | 0.0004675         | 0.000467503          | 3.65595            | 3.65595                      | T up vs N                           | 19.173  | 15.7402   | 13.1355    | 1         |
| cg22514764  | SDCCAG8                                                            | 1.24E-05          | 1.24E-05             | 6.2786             | 6.2786                       | T up vs N                           | 38.587  | 31.6118   | 13.1076    | 1         |
| cg22515937  | FCRL1;FCRL1;FCRL1                                                  |                   |                      |                    |                              |                                     |         |           |            |           |

| Probeset ID | UCSC_REFGENE_NAME                                                                               | p-value<br>(Type) | p-value (T vs.<br>N) | Ratio (T<br>vs. N) | Fold-<br>Change (T<br>vs. N) | Fold-Change (T vs.<br>N) (Description) | F(Type) | SS (Type) | SS (Error) | F (Error) |
|-------------|-------------------------------------------------------------------------------------------------|-------------------|----------------------|--------------------|------------------------------|----------------------------------------|---------|-----------|------------|-----------|
| cg22596895  | MTF2;MTF2;MTF2;MTF2                                                                             | 0.00732775        | 0.00732775           | 0.267127           | -3.74354                     | T down vs N                            | 9.4241  | 16.3204   | 27.7083    | 1         |
| cg22599115  | SLC6A19                                                                                         | 0.00010756        | 0.000107562          | 0.213425           | -4.68549                     | T down vs N                            | 25.985  | 22.3419   | 13.757     | 1         |
| cg22601108  | OR6K6                                                                                           | 1.76E-05          | 1.76E-05             | 0.151265           | -6.61091                     | T down vs N                            | 36.32   | 33.4116   | 14.7187    | 1         |
| cg22601421  | RBM47                                                                                           | 7.30E-06          | 7.30E-06             | 13.5859            | 13.5859                      | T up vs N                              | 42.271  | 63.7559   | 24.1324    | 1         |
| cg22603037  | TCHH                                                                                            | 9.51E-09          | 9.51E-09             | 0.123489           | -8.09789                     | T down vs N                            | 116.3   | 40.9751   | 5.63697    | 1         |
| cg22604218  | LOC100132111;C2CD4D                                                                             | 4.01E-05          | 4.01E-05             | 11.4438            | 11.4438                      | T up vs N                              | 31.332  | 55.6457   | 28.4157    | 1         |
| cg22606205  | PKP1;PKP1;PKP1;PKP1                                                                             | 9.51E-05          | 9.51E-05             | 17.9335            | 17.9335                      | T up vs N                              | 26.614  | 78.047    | 46.9204    | 1         |
| cg22607339  | MPL                                                                                             | 0.00011297        | 0.000112965          | 0.240449           | -4.15889                     | T down vs N                            | 25.736  | 19.0258   | 11.8282    | 1         |
| cg22608646  | DNAH17                                                                                          | 8.11E-06          | 8.11E-06             | 0.239173           | -4.18108                     | T down vs N                            | 41.526  | 19.1681   | 7.38556    | 1         |
| cg22610434  | CD1C                                                                                            | 1.18E-05          | 1.18E-05             | 0.238062           | -4.20058                     | T down vs N                            | 38.959  | 19.293    | 7.92344    | 1         |
| cg22610645  | GEFT;GEFT                                                                                       | 0.00019673        | 0.000196728          | 4.66032            | 4.66032                      | T up vs N                              | 23.03   | 22.1864   | 15.4136    | 1         |
| cg22610980  | BEST3;BEST3                                                                                     | 0.00058498        | 0.000584984          | 0.237036           | -4.21877                     | T down vs N                            | 18.241  | 19.4094   | 17.0244    | 1         |
| cg22612448  | ESRRG;ESRRG;ESRRG                                                                               | 0.00065883        | 0.00065883           | 0.179978           | -5.55625                     | T down vs N                            | 17.758  | 27.5455   | 24.818     | 1         |
| cg22613968  | MDS2                                                                                            | 0.00095055        | 0.000950545          | 0.296068           | -3.3776                      | T down vs N                            | 16.315  | 13.8759   | 13.6083    | 1         |
| cg22614532  | MYO1A                                                                                           | 0.00161642        | 0.00161642           | 0.260881           | -3.83317                     | T down vs N                            | 14.342  | 16.9107   | 18.8663    | 1         |
| cg22614927  | FUCA1                                                                                           | 3.02E-06          | 3.02E-06             | 0.224209           | -4.46013                     | T down vs N                            | 48.928  | 20.9386   | 6.84711    | 1         |
| cg22615255  | SLC25A28                                                                                        | 7.79E-06          | 7.79E-06             | 0.258228           | -3.87254                     | T down vs N                            | 41.813  | 17.1689   | 6.56978    | 1         |
| cg22615730  | ANXA4                                                                                           | 7.51E-06          | 7.51E-06             | 0.147142           | -6.79618                     | T down vs N                            | 42.073  | 34.3966   | 13.0809    | 1         |
| cg22616343  | TNXB;TNXB                                                                                       | 3.91E-06          | 3.91E-06             | 0.29957            | -3.33811                     | T down vs N                            | 46.913  | 13.6091   | 4.64144    | 1         |
| cg22616525  | LCE2A                                                                                           | 5.40E-05          | 5.40E-05             | 0.236789           | -4.22318                     | T down vs N                            | 29.645  | 19.4375   | 10.4909    | 1         |
| cg22618337  | C10orf81                                                                                        | 4.97E-06          | 4.97E-06             | 0.145955           | -6.85143                     | T down vs N                            | 45.089  | 34.6879   | 12.3091    | 1         |
| cg22621867  | GPR62                                                                                           | 0.00087236        | 0.000872359          | 6.76231            | 6.76231                      | T up vs N                              | 16.647  | 34.2175   | 32.8885    | 1         |
| cg22623319  | RBM20                                                                                           | 3.15E-05          | 3.15E-05             | 0.232347           | -4.3039                      | T down vs N                            | 32.731  | 19.9518   | 9.75318    | 1         |
| cg22624285  | IGFL3                                                                                           | 0.0001455         | 0.000145503          | 0.212899           | -4.69705                     | T down vs N                            | 24.478  | 22.4133   | 14.6505    | 1         |
| cg22629065  | OR8H1                                                                                           | 3.42E-06          | 3.42E-06             | 0.265256           | -3.76994                     | T down vs N                            | 47.947  | 16.4946   | 5.50427    | 1         |
| cg22630918  | C10orf2;C10orf2;C10orf2;C10orf2<br>RAB34;RAB34;RAB34;RAB34;RAB34;R                              | 1.91E-06          | 1.91E-06             | 0.103203           | -9.68966                     | T down vs N                            | 52.687  | 48.308    | 14.6701    | 1         |
| cg22632666  | AB34;RAB34                                                                                      | 0.00048688        | 0.00048688           | 0.300659           | -3.32603                     | T down vs N                            | 19.002  | 13.5273   | 11.3902    | 1         |
| cg22633936  | SH2D4B;SH2D4B;SH2D4B                                                                            | 1.33E-06          | 1.33E-06             | 0.295452           | -3.38465                     | T down vs N                            | 55.822  | 13.9234   | 3.99085    | 1         |
| cg22636631  | THBS4                                                                                           | 0.00176333        | 0.00176333           | 0.285203           | -3.50628                     | T down vs N                            | 14.031  | 14.7415   | 16.8102    | 1         |
| cg22637890  | MAML2                                                                                           | 0.00017922        | 0.000179219          | 0.318909           | -3.13569                     | T down vs N                            | 23.472  | 12.2332   | 8.33898    | 1         |
| cg22638105  | AGPAT6                                                                                          | 7.12E-05          | 7.12E-05             | 0.217843           | -4.59047                     | T down vs N                            | 28.141  | 21.7531   | 12.3683    | 1         |
| cg22638593  | PDLIM4;PDLIM4                                                                                   | 0.00019497        | 0.000194973          | 24.4791            | 24.4791                      | T up vs N                              | 23.073  | 95.7788   | 66.4191    | 1         |
| cg22640233  | OPCML                                                                                           | 0.002149          | 0.002149             | 6.30895            | 6.30895                      | T up vs N                              | 13.338  | 31.778    | 38.12      | 1         |
| cg22640868  | TNFAIP1;IFT20                                                                                   | 8.75E-06          | 8.75E-06             | 0.197772           | -5.05632                     | T down vs N                            | 40.994  | 24.5999   | 9.6015     | 1         |
| cg22645427  | LOC284798;LOC284798;LOC284798                                                                   | 8.69E-05          | 8.69E-05             | 17.5768            | 17.5768                      | T up vs N                              | 27.087  | 76.9642   | 45.4628    | 1         |
| cg22647546  | FAM59B                                                                                          | 0.00010506        | 0.000105058          | 3.29651            | 3.29651                      | T up vs N                              | 26.105  | 13.3273   | 8.16861    | 1         |
| cg22647743  | WWC3                                                                                            | 8.79E-06          | 8.79E-06             | 0.182758           | -5.47172                     | T down vs N                            | 40.962  | 27.0552   | 10.568     | 1         |
| cg22647929  | SOX7                                                                                            | 0.00015708        | 0.000157082          | 0.311836           | -3.20681                     | T down vs N                            | 24.105  | 12.7181   | 8.44171    | 1         |
| cg22648135  | PCDHGA4;PCDHGA6;PCDHGA1;PCDHG<br>A5;PCDHGB1;PCDHGA3;PCDHGA2;PC<br>DHGA7;PCDHGB2;PCDHGB4;PCDHGB4 | 0.00097751        | 0.000977505          | 4.13037            | 4.13037                      | T up vs N                              | 16.207  | 18.8425   | 18.6016    | 1         |
| cg22655521  | SAMD14                                                                                          | 0.00011362        | 0.000113616          | 5.27351            | 5.27351                      | T up vs N                              | 25.707  | 25.8933   | 16.1158    | 1         |
| cg22656521  | DGCR14;TSSK2                                                                                    | 3.25E-05          | 3.25E-05             | 0.157784           | -6.33777                     | T down vs N                            | 32.555  | 31.9354   | 15.6955    | 1         |
| cg22657475  | MAP7D2;MAP7D2;MAP7D2;MAP7D2                                                                     | 0.0024507         | 0.0024507            | 3.39474            | 3.39474                      | T up vs N                              | 12.888  | 13.9916   | 17.3704    | 1         |
| cg22657659  | CPZ;CPZ;CPZ                                                                                     | 1.28E-05          | 1.28E-05             | 0.288027           | -3.47189                     | T down vs N                            | 38.403  | 14.5108   | 6.04566    | 1         |
| cg22659564  | FAT3                                                                                            | 1.33E-05          | 1.33E-05             | 0.31432            | -3.18147                     | T down vs N                            | 38.157  | 12.5455   | 5.26054    | 1         |
| cg22660196  | PHACTR2;PHACTR2                                                                                 | 0.00026125        | 0.000261248          | 0.25951            | -3.85341                     | T down vs N                            | 21.719  | 17.0435   | 12.5557    | 1         |
| cg22660207  | SCRG1                                                                                           | 0.00542964        | 0.00542964           | 0.275956           | -3.62376                     | T down vs N                            | 10.322  | 15.5262   | 24.0668    | 1         |
| cg22660299  | LOC404266;HOXB5;LOC404266;LOC40<br>4266;LOC404266                                               | 0.00020075        | 0.000200747          | 0.255116           | -3.91978                     | T down vs N                            | 22.935  | 17.4778   | 12.1927    | 1         |
| cg22660933  | HOXB1                                                                                           | 8.51E-05          | 8.51E-05             | 12.833             | 12.833                       | T up vs N                              | 27.195  | 60.9998   | 35.8889    | 1         |
| cg22663489  | CCDC88B;CCDC88B                                                                                 | 4.36E-05          | 4.36E-05             | 0.294489           | -3.39571                     | T down vs N                            | 30.849  | 13.9981   | 7.26016    | 1         |
| cg22664064  | NMI                                                                                             | 2.56E-05          | 2.56E-05             | 0.258096           | -3.87452                     | T down vs N                            | 33.98   | 17.1819   | 8.09023    | 1         |
| cg22664405  | OR6C4                                                                                           | 3.18E-06          | 3.18E-06             | 0.224892           | -4.44657                     | T down vs N                            | 48.522  | 20.8534   | 6.87642    | 1         |
| cg22664614  | CPA5;CPA5;CPA5                                                                                  | 0.00020919        | 0.000209189          | 0.305343           | -3.27501                     | T down vs N                            | 22.742  | 13.1815   | 9.27362    | 1         |
| cg22665383  | OR4C16                                                                                          | 7.18E-06          | 7.18E-06             | 0.196053           | -5.10066                     | T down vs N                            | 42.394  | 24.8657   | 9.3847     | 1         |
| cg22669842  | KIR2DL1;KIR3DP1                                                                                 | 0.0003249         | 0.000324897          | 0.290509           | -3.44224                     | T down vs N                            | 20.743  | 14.3115   | 11.0392    | 1         |
| cg22671342  | FAIM3;IL24;FAIM3;FAIM3;IL24                                                                     | 1.74E-05          | 1.74E-05             | 0.148231           | -6.74622                     | T down vs N                            | 36.388  | 34.1323   | 15.0082    | 1         |
| cg22671986  | LPHN3                                                                                           | 0.00012715        | 0.000127153          | 0.307045           | -3.25685                     | T down vs N                            | 25.143  | 13.0582   | 8.30973    | 1         |
| cg22673542  | OR2T10                                                                                          | 7.49E-05          | 7.49E-05             | 0.172827           | -5.78612                     | T down vs N                            | 27.87   | 28.8632   | 16.5703    | 1         |
| cg22674248  | QRICH2                                                                                          | 0.00058603        | 0.000586032          | 0.328382           | -3.04524                     | T down vs N                            | 18.234  | 11.6146   | 10.1915    | 1         |
| cg22677048  | ORS1B2;ORS1B2                                                                                   | 0.00043735        | 0.000437353          | 0.256792           | -3.8942                      | T down vs N                            | 19.455  | 17.3106   | 14.2365    | 1         |
| cg22677556  | TNFRSF1B                                                                                        | 2.89E-05          | 2.89E-05             | 0.141243           | -7.08                        | T down vs N                            | 33.244  | 35.881    | 17.2691    | 1         |
| cg22677858  | IPO9                                                                                            | 2.14E-05          | 2.14E-05             | 0.236402           | -4.23008                     | T down vs N                            | 35.105  | 19.4816   | 8.87924    | 1         |
| cg22683154  | KDM1A;KDM1A                                                                                     | 1.00E-06          | 1.00E-06             | 0.192732           | -5.18855                     | T down vs N                            | 58.355  | 25.3899   | 6.96151    | 1         |
| cg22685215  | RASAL2                                                                                          | 0.00124873        | 0.00124873           | 0.211353           | -4.73141                     | T down vs N                            | 15.284  | 22.625    | 23.6855    | 1         |
| cg22685816  | MUC6;MUC6                                                                                       | 7.44E-05          | 7.44E-05             | 0.290639           | -3.4407                      | T down vs N                            | 27.905  | 14.3011   | 8.19988    | 1         |
| cg22685901  | SASH1                                                                                           | 0.00015805        | 0.000158052          | 0.31148            | -3.21048                     | T down vs N                            | 24.075  | 12.743    | 8.46873    | 1         |

| Probeset ID                                      | UCSC_REFGENE_NAME             | p-value<br>(Type) | p-value (T vs.<br>N) | Ratio (T<br>vs. N) | Fold-<br>Change (T<br>vs. N) | Fold-Change (T vs.<br>N) (Description) | F(Type) | SS (Type) | SS (Error) | F (Error) |
|--------------------------------------------------|-------------------------------|-------------------|----------------------|--------------------|------------------------------|----------------------------------------|---------|-----------|------------|-----------|
| cg22686939                                       | LILRA6                        | 1.04E-05          | 1.04E-05             | 0.193214           | -5.17562                     | T down vs N                            | 39.801  | 25.313    | 10.1758    | 1         |
| cg22688043                                       | ORSJ2                         | 0.00611778        | 0.00611778           | 0.315033           | -3.17427                     | T down vs N                            | 9.9603  | 12.4964   | 20.0739    | 1         |
| cg22688104                                       | NFXL1                         | 0.00121283        | 0.00121283           | 0.161367           | -6.19706                     | T down vs N                            | 15.823  | 29.3304   | 27.8048    | 1         |
| cg22697187                                       | RP1-177G6.2;RP1-177G6.2       | 0.00014952        | 0.000149524          | 0.310982           | -3.21562                     | T down vs N                            | 24.345  | 12.778    | 8.39801    | 1         |
| cg22697365                                       | PROK1                         | 1.19E-05          | 1.19E-05             | 0.314661           | -3.17803                     | T down vs N                            | 38.875  | 12.522    | 5.15374    | 1         |
| cg22697517                                       | DBF4B;DBF4B                   | 2.38E-05          | 2.38E-05             | 0.312766           | -3.19728                     | T down vs N                            | 34.437  | 12.6531   | 5.87879    | 1         |
| cg22697574                                       | C1orf94;C1orf94;C1orf94       | 9.39E-06          | 9.39E-06             | 10.099             | 10.099                       | T up vs N                              | 40.505  | 50.0844   | 19.7838    | 1         |
| cg22698489                                       | TAGLN2                        | 2.01E-09          | 2.01E-09             | 0.157359           | -6.35491                     | T down vs N                            | 144.49  | 32.0289   | 3.54675    | 1         |
| cg22699361                                       | FLJ39609                      | 0.00034222        | 0.000342221          | 0.262705           | -3.80654                     | T down vs N                            | 20.514  | 16.7357   | 13.0531    | 1         |
| cg22699620                                       | ITGB2;ITGB2                   | 3.05E-06          | 3.05E-06             | 0.196627           | -5.08578                     | T down vs N                            | 48.861  | 24.7766   | 8.11333    | 1         |
| cg22699727                                       | OR2C3                         | 1.70E-05          | 1.70E-05             | 0.221958           | -4.50535                     | T down vs N                            | 36.556  | 21.2221   | 9.28867    | 1         |
| cg22700215                                       | MAP4;MAP4;MAP4;MAP4           | 7.53E-05          | 7.53E-05             | 0.301568           | -3.316                       | T down vs N                            | 27.839  | 13.4594   | 7.73561    | 1         |
| cg22700686                                       | S100A2                        | 0.00033328        | 0.000333284          | 0.2947             | -3.39328                     | T down vs N                            | 20.63   | 13.9817   | 10.8436    | 1         |
| cg22702741                                       | EXOC4                         | 1.82E-06          | 1.82E-06             | 0.331238           | -3.01898                     | T down vs N                            | 53.085  | 11.4346   | 3.44645    | 1         |
| cg22705746                                       | FMOD                          | 5.20E-07          | 5.20E-07             | 0.142489           | -7.01806                     | T down vs N                            | 64.633  | 35.5596   | 8.80284    | 1         |
| cg22706992                                       | LVRN                          | 0.00019289        | 0.000192885          | 0.15827            | -3.16629                     | T down vs N                            | 23.123  | 12.442    | 8.6091     | 1         |
| cg22707857                                       | BTNL2                         | 3.93E-05          | 3.93E-05             | 0.228735           | -4.37188                     | T down vs N                            | 31.448  | 20.3826   | 10.3701    | 1         |
| cg22708635                                       | SLC6A3                        | 7.58E-09          | 7.58E-09             | 0.170987           | -5.84841                     | T down vs N                            | 120.09  | 29.2164   | 3.8926     | 1         |
| cg22709144                                       | GPX6                          | 0.00047279        | 0.000472789          | 0.249784           | -4.00346                     | T down vs N                            | 19.125  | 18.0225   | 15.0773    | 1         |
| cg22710865                                       | ZNF669;ZNF669                 | 1.53E-05          | 1.53E-05             | 0.129777           | -7.7055                      | T down vs N                            | 37.239  | 39.0522   | 16.7789    | 1         |
| cg22711792                                       | DMRTA2                        | 0.00516913        | 0.00516913           | 0.161572           | -6.18918                     | T down vs N                            | 10.473  | 31.1201   | 47.544     | 1         |
| cg22712403                                       | PCNX13                        | 1.41E-06          | 1.41E-06             | 0.331996           | -3.01209                     | T down vs N                            | 55.302  | 11.3874   | 3.29459    | 1         |
| cg22712955                                       | PDE4DIP;PDE4DIP               | 7.71E-05          | 7.71E-05             | 0.295245           | -3.38702                     | T down vs N                            | 27.713  | 13.9395   | 8.04795    | 1         |
| cg22713900                                       | LTK;LTK;LTK                   | 8.62E-05          | 8.62E-05             | 5.05256            | 5.05256                      | T up vs N                              | 27.127  | 24.5774   | 14.4961    | 1         |
| cg22716262                                       | MPP7                          | 4.80E-06          | 4.80E-06             | 0.167157           | -5.98238                     | T down vs N                            | 45.35   | 29.9705   | 10.574     | 1         |
| cg22717525                                       | CSNK1A1L                      | 5.66E-06          | 5.66E-06             | 0.308017           | -3.24657                     | T down vs N                            | 44.114  | 12.9884   | 4.71087    | 1         |
| cg22718050                                       | TMEM52                        | 0.00025412        | 0.000254119          | 10.0168            | 10.0168                      | T up vs N                              | 21.845  | 49.7309   | 36.4249    | 1         |
| cg22719314                                       | FLG                           | 2.45E-05          | 2.45E-05             | 0.266371           | -3.75416                     | T down vs N                            | 34.266  | 16.3905   | 7.65322    | 1         |
| cg22719658                                       | OAZ3;OAZ3                     | 7.07E-05          | 7.07E-05             | 0.250967           | -3.98458                     | T down vs N                            | 28.178  | 17.8998   | 10.1639    | 1         |
| cg22720790                                       | ZNF274;ZNF274;ZNF274          | 0.00030364        | 0.000303638          | 4.23965            | 4.23965                      | T up vs N                              | 21.043  | 19.5427   | 14.8594    | 1         |
| cg22721579                                       | FAM176B                       | 0.00067276        | 0.000672758          | 5.45101            | 5.45101                      | T up vs N                              | 17.674  | 26.9347   | 24.3834    | 1         |
| cg22721827                                       | NTN3                          | 8.84E-06          | 8.84E-06             | 0.283058           | -3.53285                     | T down vs N                            | 40.922  | 14.9194   | 5.83329    | 1         |
| cg22721851                                       | KCNJ1;KCNJ1;KCNJ1;KCNJ1;KCNJ1 | 9.58E-06          | 9.58E-06             | 0.236978           | -4.21979                     | T down vs N                            | 40.363  | 19.4159   | 7.69649    | 1         |
| cg22722802                                       | MPV17L;MPV17L                 | 0.00017122        | 0.000171223          | 3.91364            | 3.91364                      | T up vs N                              | 23.69   | 17.4377   | 11.7773    | 1         |
| cg22723502                                       | HIST1H4F                      | 0.00076586        | 0.000765856          | 14.5846            | 14.5846                      | T up vs N                              | 17.157  | 67.27     | 62.7327    | 1         |
| cg22724153                                       | SPAM1;SPAM1                   | 1.81E-05          | 1.81E-05             | 0.302187           | -3.30921                     | T down vs N                            | 36.138  | 13.4134   | 5.93867    | 1         |
| cg22724847                                       | OR14C36                       | 2.78E-05          | 2.78E-05             | 0.227419           | -4.39717                     | T down vs N                            | 33.489  | 20.5423   | 9.8144     | 1         |
| cg22724854                                       | OR10AG1                       | 0.00573103        | 0.00573103           | 0.330926           | -3.02182                     | T down vs N                            | 10.158  | 11.4541   | 18.0423    | 1         |
| LOC100132215;EHBP1;EHBP1;EHBP1;                  |                               |                   |                      |                    |                              |                                        |         |           |            |           |
| cg22727572                                       | EHBP1                         | 0.00055889        | 0.000558887          | 3.04447            | 3.04447                      | T up vs N                              | 18.429  | 11.6093   | 10.0793    | 1         |
| cg22730004                                       | SPTA1                         | 1.55E-06          | 1.55E-06             | 0.154168           | -6.48643                     | T down vs N                            | 54.487  | 32.7424   | 9.61471    | 1         |
| cg22737473                                       | C2orf47                       | 0.00091674        | 0.000916743          | 0.273469           | -3.65672                     | T down vs N                            | 16.454  | 15.7453   | 15.3107    | 1         |
| cg22738800                                       | NPNT                          | 4.18E-05          | 4.18E-05             | 0.176623           | -5.66176                     | T down vs N                            | 31.091  | 28.1532   | 14.488     | 1         |
| cg22740492                                       | PAX6;PAX6;PAX6                | 8.22E-05          | 8.22E-05             | 3.24941            | 3.24941                      | T up vs N                              | 27.377  | 13.0077   | 7.602      | 1         |
| cg22740835                                       | DDR2;DDR2                     | 0.00017889        | 0.000178891          | 0.271941           | -3.67727                     | T down vs N                            | 23.481  | 15.8817   | 10.8221    | 1         |
| cg22741244                                       | KLHL30                        | 0.00050906        | 0.000509062          | 0.329526           | -3.03466                     | T down vs N                            | 18.816  | 11.5421   | 9.81484    | 1         |
| cg22744131                                       | MAP1LC3A                      | 7.55E-05          | 7.55E-05             | 0.252352           | -3.96272                     | T down vs N                            | 27.828  | 17.7577   | 10.2101    | 1         |
| cg22744587                                       | BARX2                         | 0.00026975        | 0.000269745          | 0.309998           | -3.22583                     | T down vs N                            | 21.574  | 12.8474   | 9.52812    | 1         |
| cg22744783                                       | SEMA5A                        | 0.00043516        | 0.000435158          | 0.301841           | -3.313                       | T down vs N                            | 19.476  | 13.4391   | 11.0403    | 1         |
| cg22745143                                       | MIR1265                       | 1.44E-05          | 1.44E-05             | 0.216238           | -4.62453                     | T down vs N                            | 37.647  | 21.9646   | 9.33506    | 1         |
| cg22747380                                       | EXT1                          | 0.00133978        | 0.00133978           | 0.316885           | -3.15572                     | T down vs N                            | 15.024  | 12.3699   | 13.1739    | 1         |
| cg22747480                                       | WDR37                         | 8.19E-05          | 8.19E-05             | 0.105806           | -9.4513                      | T down vs N                            | 27.395  | 47.2542   | 27.5988    | 1         |
| cg22747650                                       | LRR61;ACTR3C;LRR61            | 0.00039292        | 0.000392922          | 5.97847            | 5.97847                      | T up vs N                              | 19.913  | 29.9486   | 24.0631    | 1         |
| cg22749810                                       | RNF213;RNF213                 | 1.04E-06          | 1.04E-06             | 0.103177           | -9.6921                      | T down vs N                            | 58.03   | 48.3187   | 13.3224    | 1         |
| cg22750001                                       | MPEG1                         | 1.32E-05          | 1.32E-05             | 0.162859           | -6.14029                     | T down vs N                            | 38.201  | 30.8499   | 12.9209    | 1         |
| cg22751848                                       | VIPR2                         | 0.00065371        | 0.000653711          | 0.318483           | -3.13988                     | T down vs N                            | 17.79   | 12.2618   | 11.0282    | 1         |
| cg22762844                                       | MAL;MAL;MAL;MAL               | 5.12E-05          | 5.12E-05             | 30.9101            | 30.9101                      | T up vs N                              | 29.937  | 110.262   | 58.9303    | 1         |
| cg22763680                                       | SLFN12L                       | 0.00336068        | 0.00336068           | 3.13476            | 3.13476                      | T up vs N                              | 11.837  | 12.2268   | 16.5274    | 1         |
| ZNF419;ZNF419;ZNF419;ZNF419;ZNF419;ZNF419;ZNF419 |                               |                   |                      |                    |                              |                                        |         |           |            |           |
| cg22766230                                       | 19;ZNF419;ZNF419              | 0.0001048         | 0.000104803          | 0.163748           | -6.10693                     | T down vs N                            | 26.117  | 30.665    | 18.7863    | 1         |
| cg22767164                                       | SIGLEC8                       | 7.69E-05          | 7.69E-05             | 0.275499           | -3.62978                     | T down vs N                            | 27.728  | 15.5662   | 8.98233    | 1         |
| cg22768222                                       | RUNX2;RUNX2                   | 7.68E-08          | 7.68E-08             | 0.225128           | -4.44191                     | T down vs N                            | 86.13   | 20.8241   | 3.86842    | 1         |
| cg22771999                                       | MSN                           | 8.71E-05          | 8.71E-05             | 0.203199           | -4.92128                     | T down vs N                            | 27.07   | 23.785    | 14.0582    | 1         |
| cg22772747                                       | HXA3                          | 2.43E-06          | 2.43E-06             | 9.02687            | 9.02687                      | T up vs N                              | 53.945  | 42.6736   | 11.8658    | 1         |
| cg22774088                                       | JSRP1                         | 1.11E-05          | 1.11E-05             | 13.5113            | 13.5113                      | T up vs N                              | 39.364  | 63.4872   | 25.8054    | 1         |
| cg22774211                                       | ADAM30;ADAM30                 | 4.87E-05          | 4.87E-05             | 3.33902            | 3.33902                      | T up vs N                              | 30.223  | 13.6152   | 7.20781    | 1         |
| cg22778903                                       | MX2                           | 0.00042795        | 0.000427946          | 4.15879            | 4.15879                      | T up vs N                              | 19.547  | 19.0252   | 15.5725    | 1         |
| cg22780242                                       | CYP2A7;CYP2A7                 | 5.24E-05          | 5.24E-05             | 0.275539           | -3.62925                     | T down vs N                            | 29.817  | 15.5627   | 8.35104    | 1         |
| cg22781714                                       | RIMBP2                        | 0.0033163         | 0.0033163            | 0.263135           | -3.80033                     | T down vs N                            | 11.88   | 16.6948   | 22.4845    | 1         |
| cg22783363                                       | TNFRSF10D                     | 0.00066303        | 0.000663027          | 5.34734            | 5.34734                      | T up vs N                              | 17.733  | 26.3282   | 23.7555    | 1         |
| cg22785136                                       | ROS1                          | 0.00055783        | 0.000557832          | 0.246722           | -4.05314                     | T down vs N                            | 18.437  | 18.3444   | 15.9199    | 1         |
| cg22785972                                       | FAM47C                        | 0.00059688        | 0.000596884          | 0.266637           | -3.75042                     | T down vs N                            | 18.159  | 16.3658   | 14.4199    | 1         |

[illegible]

| Probeset ID                                                                                     | UCSC_REFGENE_NAME                        | p-value<br>(Type) | p-value (T vs.<br>N) | Ratio (T<br>vs. N) | Fold-<br>Change (T<br>vs. N) | Fold-Change (T vs.<br>N) (Description) | F(Type) | SS (Type) | SS (Error) | F (Error) |
|-------------------------------------------------------------------------------------------------|------------------------------------------|-------------------|----------------------|--------------------|------------------------------|----------------------------------------|---------|-----------|------------|-----------|
| cg22865824                                                                                      | COMP                                     | 2.14E-05          | 2.14E-05             | 0.168525           | -5.93382                     | T down vs N                            | 35.101  | 29.698    | 13.5372    | 1         |
| cg22867538                                                                                      | BRAP                                     | 0.00011789        | 0.000117894          | 0.219075           | -4.56464                     | T down vs N                            | 25.521  | 21.5924   | 13.537     | 1         |
| cg22871253                                                                                      | EZR;EZR<br>PRAME;LOC648691;PRAME;PRAME;P | 0.00205127        | 0.00205127           | 0.277182           | -3.60774                     | T down vs N                            | 13.5    | 15.4195   | 18.2756    | 1         |
| cg22871485                                                                                      | RAME;PRAME                               | 1.05E-05          | 1.05E-05             | 0.21994            | -4.54668                     | T down vs N                            | 39.768  | 21.4804   | 8.64233    | 1         |
| cg22872634                                                                                      | SLC35A3                                  | 1.67E-05          | 1.67E-05             | 0.239936           | -4.16779                     | T down vs N                            | 36.668  | 19.0829   | 8.32681    | 1         |
| cg22872906                                                                                      | LOC285419;LOC285419                      | 3.34E-05          | 3.34E-05             | 3.37366            | 3.37366                      | T up vs N                              | 32.393  | 13.8493   | 6.84072    | 1         |
| cg22874255                                                                                      | ONECUT3                                  | 3.71E-05          | 3.71E-05             | 0.283421           | -3.52832                     | T down vs N                            | 31.782  | 14.8892   | 7.49573    | 1         |
| cg22876739                                                                                      | TET1                                     | 0.00015932        | 0.000159318          | 0.276576           | -3.61564                     | T down vs N                            | 24.037  | 15.4721   | 10.299     | 1         |
| cg22877509                                                                                      | RUSC1;RUSC1;C1orf104                     | 8.71E-06          | 8.71E-06             | 13.7171            | 13.7171                      | T up vs N                              | 41.023  | 64.2263   | 25.0496    | 1         |
| cg22878054                                                                                      | CNTN5;CNTN5                              | 2.66E-05          | 2.66E-05             | 0.271619           | -3.68162                     | T down vs N                            | 33.749  | 15.9106   | 7.54308    | 1         |
| cg22878489                                                                                      | B3GALT4                                  | 0.00072187        | 0.000721873          | 3.60125            | 3.60125                      | T up vs N                              | 17.392  | 15.3763   | 14.1456    | 1         |
| cg22881174                                                                                      | SFMBT2                                   | 0.0029644         | 0.0029644            | 3.02097            | 3.02097                      | T up vs N                              | 12.249  | 11.4483   | 14.9541    | 1         |
| cg22881680                                                                                      | P2RY6;P2RY6                              | 1.40E-06          | 1.40E-06             | 5.64219            | 5.64219                      | T up vs N                              | 55.401  | 28.0408   | 8.09834    | 1         |
| cg22881750                                                                                      | CPNE5                                    | 6.63E-05          | 6.63E-05             | 0.289717           | -3.45164                     | T down vs N                            | 28.525  | 14.3747   | 8.06301    | 1         |
| cg22882543                                                                                      | ZNF280A                                  | 9.28E-06          | 9.28E-06             | 0.253301           | -3.94787                     | T down vs N                            | 40.586  | 17.6609   | 6.96231    | 1         |
| PCDHAC1;PCDHA7;PCDHA12;PCDHA6;<br>PCDHA10;PCDHA4;PCDHA11;PCDHA8;<br>PCDHA6;PCDHA1;PCDHA2;PCDHA1 |                                          |                   |                      |                    |                              |                                        |         |           |            |           |
| cg22886139                                                                                      | ADAMTS17                                 | 0.00020041        | 0.000200414          | 3.88807            | 3.88807                      | T up vs N                              | 22.943  | 17.2705   | 12.0441    | 1         |
| cg22886323                                                                                      | PAWR                                     | 0.00012841        | 0.000128414          | 0.289369           | -3.4558                      | T down vs N                            | 25.094  | 14.4027   | 9.18318    | 1         |
| cg22888311                                                                                      | CREB5                                    | 6.30E-05          | 6.30E-05             | 0.270225           | -3.70062                     | T down vs N                            | 28.797  | 16.0365   | 8.91012    | 1         |
| cg22888958                                                                                      | UGT1A9;UGT1A10;UGT1A8                    | 4.96E-05          | 4.96E-05             | 0.200845           | -4.97895                     | T down vs N                            | 30.121  | 24.1341   | 12.82      | 1         |
| cg22891099                                                                                      | JAZF1                                    | 2.70E-05          | 2.70E-05             | 0.204464           | -4.89084                     | T down vs N                            | 33.655  | 23.6002   | 11.2197    | 1         |
| cg22892036                                                                                      | ACTR3C;ACTR3C;LRRC61;LRRC61              | 0.0001138         | 0.000113799          | 0.329504           | -3.03487                     | T down vs N                            | 25.699  | 11.5435   | 7.18689    | 1         |
| cg22893248                                                                                      | KLRG2                                    | 0.00018265        | 0.000182651          | 8.7966             | 8.7966                       | T up vs N                              | 23.382  | 44.2819   | 30.3021    | 1         |
| cg22894276                                                                                      | MIR193A                                  | 7.21E-06          | 7.21E-06             | 0.209036           | -4.78387                     | T down vs N                            | 42.365  | 22.9472   | 8.66644    | 1         |
| cg22894896                                                                                      | FAM12B                                   | 4.68E-06          | 4.68E-06             | 35.0799            | 35.0799                      | T up vs N                              | 45.533  | 118.545   | 41.6563    | 1         |
| cg22895202                                                                                      | PRRT1                                    | 0.00022395        | 0.000223949          | 0.239285           | -4.17912                     | T down vs N                            | 22.425  | 19.1556   | 13.6671    | 1         |
| cg22897615                                                                                      | ABCB1                                    | 2.25E-05          | 2.25E-05             | 7.50248            | 7.50248                      | T up vs N                              | 34.778  | 38.0375   | 17.4994    | 1         |
| cg22899422                                                                                      | GRIN3B                                   | 4.54E-05          | 4.54E-05             | 0.310613           | -3.21944                     | T down vs N                            | 30.617  | 12.8039   | 6.69106    | 1         |
| cg22901212                                                                                      | HLA-DRB6                                 | 2.90E-06          | 2.90E-06             | 0.124008           | -8.06402                     | T down vs N                            | 49.267  | 40.8111   | 13.254     | 1         |
| cg22901297                                                                                      | CECR1;CECR1                              | 0.00069129        | 0.000691289          | 0.298174           | -3.35374                     | T down vs N                            | 17.565  | 13.7147   | 12.4928    | 1         |
| cg22902400                                                                                      | POBEC3G;POBEC3G                          | 0.00100292        | 0.00100292           | 0.311415           | -3.21115                     | T down vs N                            | 16.109  | 12.7476   | 12.6613    | 1         |
| cg22903657                                                                                      | KIAA1530                                 | 0.00249726        | 0.00249726           | 0.30265            | -3.30414                     | T down vs N                            | 12.824  | 13.3791   | 16.6927    | 1         |
| cg22904406                                                                                      | DAXX;DAXX;DAXX;DAXX                      | 1.42E-05          | 1.42E-05             | 0.291247           | -3.43351                     | T down vs N                            | 37.716  | 14.2527   | 6.0464     | 1         |
| cg22905368                                                                                      | TRMT61A                                  | 2.06E-05          | 2.06E-05             | 0.091744           | -10.8999                     | T down vs N                            | 35.33   | 53.4446   | 24.2035    | 1         |
| cg22907034                                                                                      | MUC13                                    | 0.00039638        | 0.000396379          | 0.255694           | -3.91092                     | T down vs N                            | 19.876  | 17.4199   | 14.0231    | 1         |
| cg22909935                                                                                      | SPOCK1                                   | 2.18E-06          | 2.18E-06             | 0.202336           | -4.94228                     | T down vs N                            | 51.59   | 23.9123   | 7.41618    | 1         |
| cg22910462                                                                                      | RYR1;RYR1                                | 0.00031517        | 0.000315172          | 6.38117            | 6.38117                      | T up vs N                              | 20.877  | 32.1719   | 24.6562    | 1         |
| cg22912497                                                                                      | DNAJC22                                  | 0.00093528        | 0.000935275          | 0.146119           | -6.84372                     | T down vs N                            | 16.377  | 34.6473   | 33.8498    | 1         |
| cg22913903                                                                                      | FAM59B                                   | 0.0025476         | 0.0025476            | 3.34938            | 3.34938                      | T up vs N                              | 12.756  | 13.6852   | 17.1652    | 1         |
| cg22920501                                                                                      | VWA2                                     | 0.00036738        | 0.00036738           | 6.66091            | 6.66091                      | T up vs N                              | 20.204  | 33.6787   | 26.6705    | 1         |
| cg22923514                                                                                      | PRHOXNB                                  | 1.53E-05          | 1.53E-05             | 3.77094            | 3.77094                      | T up vs N                              | 37.246  | 16.5012   | 7.08847    | 1         |
| cg22926422                                                                                      | GRIP1                                    | 6.07E-08          | 6.07E-08             | 0.209233           | -4.77936                     | T down vs N                            | 89.14   | 22.9195   | 4.11387    | 1         |
| cg22927653                                                                                      | RAD51L1;RAD51L1;RAD51L1                  | 2.08E-05          | 2.08E-05             | 0.247392           | -4.04217                     | T down vs N                            | 35.284  | 18.2734   | 8.28641    | 1         |
| cg22930549                                                                                      | TRH                                      | 7.05E-05          | 7.05E-05             | 0.23781            | -4.20505                     | T down vs N                            | 28.187  | 19.3216   | 10.9677    | 1         |
| cg22931604                                                                                      | OR5D16                                   | 7.08E-05          | 7.08E-05             | 7.82874            | 7.82874                      | T up vs N                              | 28.169  | 39.6615   | 22.5279    | 1         |
| cg22937354                                                                                      | HLA-DRA                                  | 1.02E-07          | 1.02E-07             | 0.230781           | -4.33311                     | T down vs N                            | 82.639  | 20.1372   | 3.89884    | 1         |
| cg22937462                                                                                      | MNAT1                                    | 0.00077094        | 0.000770941          | 0.302639           | -3.30427                     | T down vs N                            | 17.131  | 13.3799   | 12.4965    | 1         |
| cg22940525                                                                                      | PSG5;PSG5                                | 2.29E-06          | 2.29E-06             | 0.23815            | -4.19903                     | T down vs N                            | 51.199  | 19.2831   | 6.02604    | 1         |
| cg22941025                                                                                      | HLA-DPA1                                 | 2.23E-06          | 2.23E-06             | 0.220433           | -4.53652                     | T down vs N                            | 51.41   | 21.4169   | 6.66544    | 1         |
| cg22941409                                                                                      | CCDC27                                   | 1.23E-05          | 1.23E-05             | 0.195627           | -5.11177                     | T down vs N                            | 38.676  | 24.9322   | 10.3144    | 1         |
| cg22942897                                                                                      | BLCAP;BLCAP;BLCAP;BLCAP;NNAT;NN          | 1.61E-05          | 1.61E-05             | 0.282928           | -3.53447                     | T down vs N                            | 36.891  | 14.9302   | 6.47536    | 1         |
| cg22943498                                                                                      | AT;BLCAP                                 | 0.00064272        | 0.000642723          | 3.73501            | 3.73501                      | T up vs N                              | 17.858  | 16.264    | 14.5716    | 1         |
| cg22945457                                                                                      | LBR;LBR                                  | 3.56E-05          | 3.56E-05             | 0.276373           | -3.6183                      | T down vs N                            | 32.025  | 15.4899   | 7.73895    | 1         |
| cg22945556                                                                                      | FAM83E                                   | 0.00192779        | 0.00192779           | 0.153712           | -6.50568                     | T down vs N                            | 13.716  | 32.8463   | 38.3148    | 1         |
| cg22946147                                                                                      | ZNF804B;MGC26647                         | 6.18E-05          | 6.18E-05             | 0.171697           | -5.82422                     | T down vs N                            | 28.904  | 29.0794   | 16.0969    | 1         |
| cg22946460                                                                                      | NAV2;NAV2                                | 0.00063077        | 0.000630769          | 0.312321           | -3.20184                     | T down vs N                            | 17.934  | 12.6842   | 11.3161    | 1         |
| cg22950754                                                                                      | PDRG1                                    | 1.23E-05          | 1.23E-05             | 0.199129           | -5.02188                     | T down vs N                            | 38.657  | 24.3929   | 10.0962    | 1         |
| cg22953267                                                                                      | ABCF1;ABCF1                              | 3.55E-05          | 3.55E-05             | 0.216891           | -4.61062                     | T down vs N                            | 32.039  | 21.8783   | 10.926     | 1         |
| cg22953731                                                                                      | KLB                                      | 7.22E-05          | 7.22E-05             | 0.195322           | -5.11974                     | T down vs N                            | 28.066  | 24.9798   | 14.2407    | 1         |
| cg22954818                                                                                      | POBEC3A                                  | 5.91E-05          | 5.91E-05             | 0.277153           | -3.60812                     | T down vs N                            | 29.149  | 15.422    | 8.4652     | 1         |
| cg22958090                                                                                      | KRT7                                     | 1.30E-05          | 1.30E-05             | 21.2704            | 21.2704                      | T up vs N                              | 38.286  | 87.5472   | 36.5869    | 1         |
| cg22962123                                                                                      | HOXA3;HOXA3;HOXA3;HOXA3                  | 3.33E-05          | 3.33E-05             | 4.35545            | 4.35545                      | T up vs N                              | 32.411  | 20.2787   | 10.0108    | 1         |
| cg22962883                                                                                      | NNMT                                     | 1.27E-06          | 1.27E-06             | 0.156268           | -6.39927                     | T down vs N                            | 56.264  | 32.2703   | 9.17685    | 1         |
| cg22963109                                                                                      | CLYBL                                    | 0.00230777        | 0.00230777           | 0.240249           | -4.16236                     | T down vs N                            | 13.093  | 19.048    | 23.2776    | 1         |
| cg22965432                                                                                      | ST8SIA4;ST8SIA4                          | 0.00030661        | 0.000306614          | 3.34896            | 3.34896                      | T up vs N                              | 20.999  | 13.6824   | 10.425     | 1         |
| cg22967080                                                                                      | GNG2                                     | 0.00036587        | 0.000365874          | 0.249947           | -4.00086                     | T down vs N                            | 20.222  | 18.0056   | 14.2462    | 1         |
| cg22968167                                                                                      | OR51G1                                   | 6.96E-05          | 6.96E-05             | 0.157929           | -6.33197                     | T down vs N                            | 28.262  | 31.9038   | 18.0619    | 1         |
| cg22968401                                                                                      | PIPOX;PIPOX                              | 0.00055388        | 0.000553881          | 0.326263           | -3.06501                     | T down vs N                            | 18.466  | 11.75     | 10.1809    | 1         |

| Probeset ID                                                                             | UCSC_REFGENE_NAME                                                                         | p-value<br>(Type) | p-value (T vs.<br>N) | Ratio (T<br>vs. N) | Fold-<br>Change (T<br>vs. N) | Fold-Change (T vs.<br>N) (Description) | F(Type) | SS (Type) | SS (Error) | F (Error) |
|-----------------------------------------------------------------------------------------|-------------------------------------------------------------------------------------------|-------------------|----------------------|--------------------|------------------------------|----------------------------------------|---------|-----------|------------|-----------|
| cg22969541                                                                              | MTM1                                                                                      | 0.0014431         | 0.0014431            | 0.292445           | -3.41944                     | T down vs N                            | 14.752  | 14.158    | 15.3562    | 1         |
| cg22971153                                                                              | IL1F10                                                                                    | 6.98E-06          | 6.98E-06             | 0.204385           | -4.89274                     | T down vs N                            | 42.594  | 23.6117   | 8.8696     | 1         |
| cg22971191                                                                              | SLC10A2                                                                                   | 1.51E-05          | 1.51E-05             | 0.325181           | -3.07521                     | T down vs N                            | 37.293  | 11.8198   | 5.07111    | 1         |
| cg22971920                                                                              | NAA10                                                                                     | 0.00049378        | 0.000493784          | 0.322049           | -3.10512                     | T down vs N                            | 18.943  | 12.0243   | 10.1562    | 1         |
| cg22972858                                                                              | GPR81                                                                                     | 5.61E-06          | 5.61E-06             | 0.19714            | -5.07253                     | T down vs N                            | 44.177  | 24.6972   | 8.94475    | 1         |
| cg22973728                                                                              | FLJ45244                                                                                  | 8.19E-05          | 8.19E-05             | 0.321433           | -3.11107                     | T down vs N                            | 27.393  | 12.065    | 7.04702    | 1         |
| cg22975671                                                                              | BCL6B                                                                                     | 0.00105687        | 0.00105687           | 4.60001            | 4.60001                      | T up vs N                              | 15.91   | 21.8124   | 21.9363    | 1         |
| cg22979783                                                                              | CYP26B1                                                                                   | 0.00229938        | 0.00229938           | 4.91983            | 4.91983                      | T up vs N                              | 13.105  | 23.7762   | 29.028     | 1         |
| cg22979807                                                                              | TMEM150B                                                                                  | 1.80E-06          | 1.80E-06             | 0.324858           | -3.07827                     | T down vs N                            | 53.197  | 11.8407   | 3.56131    | 1         |
| cg22982368                                                                              | PAX6;PAX6;PAX6                                                                            | 0.00018801        | 0.000188008          | 5.28901            | 5.28901                      | T up vs N                              | 23.244  | 25.9848   | 17.8863    | 1         |
| cg22984198                                                                              | TLE2;TLE2;TLE2                                                                            | 6.84E-05          | 6.84E-05             | 0.258814           | -3.86378                     | T down vs N                            | 28.35   | 17.1115   | 9.65722    | 1         |
| cg22985016                                                                              | SLC9A3                                                                                    | 0.00528748        | 0.00528748           | 0.263932           | -3.78886                     | T down vs N                            | 10.403  | 16.6193   | 25.5599    | 1         |
| MIR941-3;MIR941-2;MIR941-1;MIR941-3;MIR941-3;MIR941-2;DNAJC5;MIR941-3;MIR941-2;MIR941-1 |                                                                                           |                   |                      |                    |                              |                                        |         |           |            |           |
| cg22987078                                                                              | 2;MIR941-1                                                                                | 1.07E-05          | 1.07E-05             | 3.59727            | 3.59727                      | T up vs N                              | 39.609  | 15.3497   | 6.20055    | 1         |
| cg22988237                                                                              | EFNA3                                                                                     | 0.00459665        | 0.00459665           | 3.62079            | 3.62079                      | T up vs N                              | 10.837  | 15.5064   | 22.8942    | 1         |
| cg22993195                                                                              | AMIGO3;RNF123                                                                             | 0.00050764        | 0.000507639          | 4.54611            | 4.54611                      | T up vs N                              | 18.828  | 21.4768   | 18.2515    | 1         |
| cg22995232                                                                              | SLC22A9                                                                                   | 2.28E-05          | 2.28E-05             | 0.133979           | -7.46383                     | T down vs N                            | 34.707  | 37.8428   | 17.4459    | 1         |
| cg22995724                                                                              | GSDMD;GSDMD                                                                               | 0.00288778        | 0.00288778           | 0.178786           | -5.59329                     | T down vs N                            | 12.336  | 27.7594   | 36.0044    | 1         |
| cg22995959                                                                              | GPR135                                                                                    | 1.40E-05          | 1.40E-05             | 3.07335            | 3.07335                      | T up vs N                              | 37.828  | 11.807    | 4.99396    | 1         |
| cg22997040                                                                              | ZHX2                                                                                      | 3.49E-05          | 3.49E-05             | 0.198117           | -5.04752                     | T down vs N                            | 32.128  | 24.5471   | 12.2247    | 1         |
| cg22998777                                                                              | RNASE2                                                                                    | 8.03E-05          | 8.03E-05             | 0.331874           | -3.01319                     | T down vs N                            | 27.495  | 11.3949   | 6.63091    | 1         |
| cg23004031                                                                              | MGMT                                                                                      | 0.00281496        | 0.00281496           | 0.218448           | -4.57776                     | T down vs N                            | 12.421  | 21.674    | 27.919     | 1         |
| ADRA1A;ADRA1A;ADRA1A;ADRA1A                                                             |                                                                                           |                   |                      |                    |                              |                                        |         |           |            |           |
| cg23008606                                                                              | GAL                                                                                       | 0.00028145        | 0.000281447          | 8.59983            | 8.59983                      | T up vs N                              | 21.382  | 43.3653   | 32.4493    | 1         |
| cg23009355                                                                              | LRRCC;TDGF1                                                                               | 0.00179339        | 0.00179339           | 4.35075            | 4.35075                      | T up vs N                              | 13.971  | 20.2489   | 23.1895    | 1         |
| cg23009419                                                                              | OR2Y1                                                                                     | 6.48E-05          | 6.48E-05             | 3.43571            | 3.43571                      | T up vs N                              | 28.649  | 14.2675   | 7.96816    | 1         |
| cg23010035                                                                              | FAM5C                                                                                     | 6.25E-06          | 6.25E-06             | 0.322293           | -3.10277                     | T down vs N                            | 43.39   | 12.0083   | 4.42808    | 1         |
| cg23010538                                                                              | FRMD4A                                                                                    | 0.00130043        | 0.00130043           | 7.00845            | 7.00845                      | T up vs N                              | 26.69   | 12.2749   | 3.21931    | 1         |
| cg23011788                                                                              | KIF26B                                                                                    | 8.66E-05          | 8.66E-05             | 0.199669           | -5.00829                     | T down vs N                            | 27.1    | 24.3111   | 14.3532    | 1         |
| cg23014549                                                                              | CCDC71                                                                                    | 0.0002322         | 0.000232196          | 0.297313           | -3.36346                     | T down vs N                            | 22.258  | 13.7804   | 9.90584    | 1         |
| cg23015407                                                                              | GFAP                                                                                      | 0.0001655         | 0.000165501          | 0.331982           | -3.01222                     | T down vs N                            | 23.853  | 11.3883   | 7.63894    | 1         |
| cg23016243                                                                              | OR2C3                                                                                     | 4.30E-05          | 4.30E-05             | 0.300171           | -3.33143                     | T down vs N                            | 30.924  | 13.5638   | 7.01791    | 1         |
| cg23016600                                                                              | QTRT1                                                                                     | 8.51E-06          | 8.51E-06             | 0.212218           | -4.71215                     | T down vs N                            | 41.189  | 22.5064   | 8.74267    | 1         |
| cg23018448                                                                              | MAFG;MAFG                                                                                 | 0.00038268        | 0.000382683          | 0.278893           | -3.58561                     | T down vs N                            | 20.027  | 15.2719   | 12.2008    | 1         |
| cg23018755                                                                              | TCHH                                                                                      | 1.96E-05          | 1.96E-05             | 5.5032             | 5.5032                       | T up vs N                              | 35.643  | 27.2382   | 12.2273    | 1         |
| cg23021650                                                                              | TTL8                                                                                      | 0.00476995        | 0.00476995           | 0.294157           | -3.39955                     | T down vs N                            | 10.722  | 14.024    | 20.9284    | 1         |
| cg23023844                                                                              | COG5;COG5;COG5                                                                            | 3.27E-06          | 3.27E-06             | 0.131201           | -7.62191                     | T down vs N                            | 48.311  | 38.6361   | 12.7959    | 1         |
| cg23024343                                                                              | MYRIP                                                                                     | 5.25E-05          | 5.25E-05             | 0.282378           | -3.54135                     | T down vs N                            | 29.8    | 14.9763   | 8.04096    | 1         |
| cg23024967                                                                              | FAM155A                                                                                   | 0.00060483        | 0.000604833          | 0.309194           | -3.23422                     | T down vs N                            | 18.105  | 12.9045   | 11.4041    | 1         |
| cg23026106                                                                              | HLA-DMB                                                                                   | 0.00011683        | 0.000116833          | 0.289652           | -3.45242                     | T down vs N                            | 25.567  | 14.3799   | 8.9992     | 1         |
| cg23026930                                                                              | SEC22C                                                                                    | 0.00013035        | 0.000130347          | 0.207566           | -4.81774                     | T down vs N                            | 25.02   | 23.1545   | 14.8072    | 1         |
| cg23027157                                                                              | GHITM                                                                                     | 6.36E-05          | 6.36E-05             | 0.307873           | -3.2481                      | T down vs N                            | 28.747  | 12.9988   | 7.23485    | 1         |
| cg23027704                                                                              | SNORD115-19;SNORD115-17;SNORD115-18;SNORD115-19;SNORD115-17;SNORD115-18                   | 0.00062121        | 0.000621211          | 0.273893           | -3.65107                     | T down vs N                            | 17.996  | 15.7077   | 13.9653    | 1         |
| cg23029409                                                                              | NUDT9P1                                                                                   | 0.00065544        | 0.00065544           | 0.300661           | -3.326                       | T down vs N                            | 17.779  | 13.5271   | 12.1734    | 1         |
| cg23034437                                                                              | PCDHGA4;PCDHGA9;PCDHGA1;PCDHG B1;PCDHGB6;PCDHGB6;PCDHGB3;PCD HGA6;PCDHGA8;PCDHGA5;PCDHGB4 | 4.87E-05          | 4.87E-05             | 0.304381           | -3.28535                     | T down vs N                            | 30.221  | 13.2517   | 7.01585    | 1         |
| cg23034757                                                                              | SNRPE                                                                                     | 0.00045162        | 0.000451622          | 0.257775           | -3.87935                     | T down vs N                            | 19.319  | 17.2135   | 14.2564    | 1         |
| cg23035341                                                                              | ZNF761;LOC147804                                                                          | 0.00075501        | 0.000755012          | 8.28855            | 8.28855                      | T up vs N                              | 17.214  | 41.892    | 38.9383    | 1         |
| cg23035602                                                                              | MIR548H4;TMEM84                                                                           | 0.00048711        | 0.000487105          | 0.297332           | -3.36324                     | T down vs N                            | 19      | 13.7789   | 11.6032    | 1         |
| cg23036340                                                                              | HEYL                                                                                      | 3.16E-05          | 3.16E-05             | 10.7312            | 10.7312                      | T up vs N                              | 32.729  | 52.7491   | 25.7868    | 1         |
| cg23037132                                                                              | MR1                                                                                       | 1.69E-07          | 1.69E-07             | 0.064775           | -15.438                      | T down vs N                            | 76.657  | 70.1549   | 14.643     | 1         |
| cg23037321                                                                              | RIPK3                                                                                     | 0.00203339        | 0.00203339           | 3.6502             | 3.6502                       | T up vs N                              | 13.53   | 15.702    | 18.5685    | 1         |
| cg23038074                                                                              | LY9;LY9                                                                                   | 0.00189672        | 0.00189672           | 0.23631            | -4.23172                     | T down vs N                            | 13.774  | 19.4921   | 22.6431    | 1         |
| cg23038349                                                                              | ZXDC                                                                                      | 9.93E-05          | 9.93E-05             | 0.303538           | -3.29448                     | T down vs N                            | 26.394  | 13.3136   | 8.07082    | 1         |
| cg23040209                                                                              | RBPMS;RBPMS;RBPMS;RBPMS                                                                   | 0.00377556        | 0.00377556           | 0.312838           | -3.19654                     | T down vs N                            | 11.46   | 12.6481   | 17.6585    | 1         |
| cg23044884                                                                              | PDE4B;PDE4B;PDE4B;PDE4B                                                                   | 0.00660173        | 0.00660173           | 0.235039           | -4.25461                     | T down vs N                            | 9.7325  | 19.6381   | 32.2846    | 1         |
| cg23045908                                                                              | SPATS2L;SPATS2L;SPATS2L;SPATS2L                                                           | 0.00010538        | 0.000105377          | 0.116982           | -8.54829                     | T down vs N                            | 26.089  | 43.1233   | 26.4468    | 1         |
| cg23046231                                                                              | IGF1;IGF1;IGF1                                                                            | 0.00011074        | 0.000110743          | 0.272097           | -3.67516                     | T down vs N                            | 25.837  | 15.8677   | 9.82647    | 1         |
| cg23046919                                                                              | FABP5                                                                                     | 1.83E-05          | 1.83E-05             | 26.2693            | 26.2693                      | T up vs N                              | 36.08   | 100.054   | 44.3697    | 1         |
| cg23048068                                                                              | ARID3A                                                                                    | 1.58E-05          | 1.58E-05             | 0.313588           | -3.1889                      | T down vs N                            | 37.002  | 12.5961   | 5.4466     | 1         |
| cg23048215                                                                              | TM2D3;TM2D3                                                                               | 3.26E-05          | 3.26E-05             | 0.322796           | -3.09793                     | T down vs N                            | 32.534  | 11.9752   | 5.88938    | 1         |
| cg23049226                                                                              | C1QTNF3;C1QTNF3                                                                           | 0.0009203         | 0.000920295          | 0.313888           | -3.18585                     | T down vs N                            | 16.439  | 12.5753   | 12.2392    | 1         |
| cg23051392                                                                              | SRP19                                                                                     | 0.00388989        | 0.00388989           | 0.329396           | -3.03586                     | T down vs N                            | 11.365  | 11.5503   | 16.2614    | 1         |
| cg23052267                                                                              | EIF1AD                                                                                    | 0.00074238        | 0.000742384          | 0.329762           | -3.03249                     | T down vs N                            | 17.281  | 11.5273   | 10.673     | 1         |

| Probeset ID | UCSC_REFGENE_NAME                  | p-value<br>(Type) | p-value (T vs.<br>N) | Ratio (T<br>vs. N) | Fold-<br>Change (T<br>vs. N) | Fold-Change (T vs.<br>N) (Description) | F(Type) | SS (Type) | SS (Error) | F (Error) |
|-------------|------------------------------------|-------------------|----------------------|--------------------|------------------------------|----------------------------------------|---------|-----------|------------|-----------|
| cg23053374  | OR52J3                             | 0.00094881        | 0.000948807          | 0.255688           | -3.91101                     | T down vs N                            | 16.322  | 17.4205   | 17.0772    | 1         |
| cg23053742  | LACTB2                             | 0.00079372        | 0.000793719          | 0.247407           | -4.04192                     | T down vs N                            | 17.016  | 18.2718   | 17.1806    | 1         |
| cg23054121  | TSSC4                              | 0.00088737        | 0.000887373          | 0.240526           | -4.15756                     | T down vs N                            | 16.58   | 19.0173   | 18.3517    | 1         |
| cg23055682  | C2orf16                            | 0.00689638        | 0.00689638           | 0.329746           | -3.03264                     | T down vs N                            | 9.6029  | 11.5282   | 19.2079    | 1         |
| cg23055707  | PXDN                               | 3.29E-05          | 3.29E-05             | 0.210397           | -4.75291                     | T down vs N                            | 32.483  | 22.7572   | 11.2094    | 1         |
| cg23055735  | SHANK2                             | 9.11E-07          | 9.11E-07             | 3.7324             | 3.7324                       | T up vs N                              | 59.255  | 16.2468   | 4.38694    | 1         |
| cg23056602  | EDA2R                              | 8.47E-05          | 8.47E-05             | 0.142994           | -6.9933                      | T down vs N                            | 27.217  | 35.4307   | 20.8289    | 1         |
| cg23057687  | TMSL3;FAM190A                      | 8.22E-05          | 8.22E-05             | 0.215059           | -4.64989                     | T down vs N                            | 27.377  | 22.1218   | 12.9288    | 1         |
| cg23058239  | GTSF1                              | 1.85E-05          | 1.85E-05             | 0.317322           | -3.15137                     | T down vs N                            | 36.004  | 12.3402   | 5.48391    | 1         |
| cg23058652  | DOCK6                              | 0.00023183        | 0.000231829          | 0.235838           | -4.24019                     | T down vs N                            | 22.266  | 19.5462   | 14.0459    | 1         |
| cg23059797  | VWA5B2;MIR1224                     | 4.09E-05          | 4.09E-05             | 0.27913            | -3.58257                     | T down vs N                            | 31.211  | 15.2517   | 7.81859    | 1         |
| cg23059965  | C19orf41                           | 0.00032957        | 0.000329566          | 0.194489           | -5.14168                     | T down vs N                            | 20.68   | 25.1108   | 19.4283    | 1         |
| cg23061046  | NCRNA00085                         | 5.46E-08          | 5.46E-08             | 7.76143            | 7.76143                      | T up vs N                              | 90.531  | 39.3293   | 6.95084    | 1         |
| cg23064481  | TRIM15                             | 5.65E-05          | 5.65E-05             | 0.209912           | -4.7639                      | T down vs N                            | 29.394  | 22.8247   | 12.424     | 1         |
| cg23066159  | KLK7;KLK7                          | 0.00041301        | 0.000413006          | 0.200814           | -4.97973                     | T down vs N                            | 19.699  | 24.1388   | 19.6058    | 1         |
| cg23067085  | FOX P1                             | 2.04E-05          | 2.04E-05             | 0.1902             | -5.2078                      | T down vs N                            | 35.406  | 25.5042   | 11.5255    | 1         |
| cg23069847  | C11orf20;C11orf20                  | 9.05E-05          | 9.05E-05             | 3.64922            | 3.64922                      | T up vs N                              | 26.87   | 15.6955   | 9.34592    | 1         |
| cg23071186  | TNFSF14;TNFSF14                    | 0.00016192        | 0.000161916          | 0.216828           | -4.61196                     | T down vs N                            | 23.959  | 21.8867   | 14.6163    | 1         |
| cg23073467  | MIR516A2;MIR519A2                  | 3.36E-06          | 3.36E-06             | 0.329522           | -3.0347                      | T down vs N                            | 48.085  | 11.5424   | 3.84068    | 1         |
| cg23074932  | PCDHGA2;PCDHGA1;PCDHGA2            | 0.00125048        | 0.00125048           | 3.15367            | 3.15367                      | T up vs N                              | 15.278  | 12.3559   | 12.9395    | 1         |
| cg23078228  | MIR548A2                           | 0.00084254        | 0.00084254           | 0.31168            | -3.20842                     | T down vs N                            | 16.782  | 12.729    | 12.1357    | 1         |
| cg23082003  | SAP18                              | 1.33E-06          | 1.33E-06             | 0.20639            | -4.84521                     | T down vs N                            | 55.847  | 23.3222   | 6.68178    | 1         |
| cg23083516  | SCAND2;SCAND2                      | 0.00092364        | 0.000923644          | 0.294623           | -3.39417                     | T down vs N                            | 16.425  | 13.9877   | 13.6255    | 1         |
| cg23085343  | TC2                                | 4.68E-05          | 4.68E-05             | 63.2315            | 63.2315                      | T up vs N                              | 30.442  | 161.06    | 84.6516    | 1         |
| cg23086243  | DHRS11                             | 3.06E-06          | 3.06E-06             | 0.305311           | -3.27535                     | T down vs N                            | 48.826  | 13.1838   | 4.32031    | 1         |
| cg23086982  | MAN2B1                             | 6.50E-05          | 6.50E-05             | 0.212249           | -4.71145                     | T down vs N                            | 28.625  | 22.5021   | 12.5777    | 1         |
| cg23088456  | SKIV2L                             | 5.77E-07          | 5.77E-07             | 0.199582           | -5.01047                     | T down vs N                            | 63.615  | 24.3242   | 6.11791    | 1         |
| cg23089272  | FSIP1                              | 0.00101621        | 0.00101621           | 0.321501           | -3.11041                     | T down vs N                            | 16.059  | 12.0605   | 12.0164    | 1         |
| cg23090824  | PDE7B;PDE7B                        | 4.15E-05          | 4.15E-05             | 0.225422           | -4.43613                     | T down vs N                            | 31.125  | 20.7877   | 10.6861    | 1         |
| cg23091057  | ZDHHC11                            | 6.44E-05          | 6.44E-05             | 0.222806           | -4.48821                     | T down vs N                            | 28.681  | 21.1148   | 11.7791    | 1         |
| cg23091122  | SYPL2                              | 4.43E-05          | 4.43E-05             | 0.301531           | -3.31641                     | T down vs N                            | 30.756  | 13.4622   | 7.00329    | 1         |
| cg23091656  | LGALS7B                            | 1.74E-07          | 1.74E-07             | 4.80896            | 4.80896                      | T up vs N                              | 76.328  | 23.1008   | 4.84244    | 1         |
| cg23094666  | WDR25;WDR25                        | 6.89E-06          | 6.89E-06             | 0.102714           | -9.73577                     | T down vs N                            | 42.69   | 48.5101   | 18.1812    | 1         |
| cg23095010  | LRRC20;LRRC20;LRRC20               | 0.00483583        | 0.00483583           | 0.311914           | -3.20601                     | T down vs N                            | 10.679  | 12.7126   | 19.0471    | 1         |
| cg23095743  | PITX3                              | 3.07E-06          | 3.07E-06             | 36.1141            | 36.1141                      | T up vs N                              | 48.803  | 120.489   | 39.502     | 1         |
| cg23097843  | MIR526B                            | 5.09E-05          | 5.09E-05             | 0.148671           | -6.72626                     | T down vs N                            | 29.978  | 34.0264   | 18.1608    | 1         |
| cg23097961  | SULT2B1                            | 5.10E-05          | 5.10E-05             | 0.217061           | -4.607                       | T down vs N                            | 29.966  | 21.8558   | 11.6697    | 1         |
| cg23098529  | PPAN;PPAN-P2RY11                   | 0.00032828        | 0.000328283          | 0.174563           | -5.72858                     | T down vs N                            | 20.697  | 28.5355   | 22.0597    | 1         |
| cg23098661  | IL17D                              | 2.79E-05          | 2.79E-05             | 0.259967           | -3.84664                     | T down vs N                            | 33.474  | 16.9991   | 12.5239    | 1         |
| cg23099913  | HOXB1                              | 3.85E-05          | 3.85E-05             | 5.17476            | 5.17476                      | T up vs N                              | 31.568  | 25.3079   | 12.827     | 1         |
| cg23101680  | SPERT                              | 3.28E-05          | 3.28E-05             | 0.281065           | -3.5579                      | T down vs N                            | 32.507  | 15.0869   | 7.42585    | 1         |
| cg23101885  | RAD51AP2                           | 1.23E-05          | 1.23E-05             | 0.275763           | -3.6263                      | T down vs N                            | 38.652  | 15.543    | 6.43398    | 1         |
| cg23102386  | STAMBP;STAMBP;STAMBP               | 0.00189077        | 0.00189077           | 0.330704           | -3.02385                     | T down vs N                            | 13.785  | 11.468    | 13.3112    | 1         |
| cg23103346  | NAT8                               | 6.73E-06          | 6.73E-06             | 0.205656           | -4.86248                     | T down vs N                            | 42.85   | 23.4275   | 8.74767    | 1         |
| cg23104816  | ABCF1;ABCF1;MIR877                 | 0.00015519        | 0.000155185          | 0.316408           | -3.16048                     | T down vs N                            | 24.164  | 12.4023   | 8.21207    | 1         |
| cg23106844  | PSMB4                              | 1.13E-05          | 1.13E-05             | 0.256876           | -3.89293                     | T down vs N                            | 39.257  | 17.3023   | 7.05199    | 1         |
| cg23108559  | WDHD1;WDHD1                        | 0.00155338        | 0.00155338           | 0.33077            | -3.02325                     | T down vs N                            | 14.485  | 11.4639   | 12.6633    | 1         |
| cg23108580  | KIF21A                             | 0.00037092        | 0.000370922          | 0.270468           | -3.6973                      | T down vs N                            | 20.163  | 16.0145   | 12.7083    | 1         |
| cg23108673  | C10orf28                           | 1.41E-05          | 1.41E-05             | 0.236306           | -4.2318                      | T down vs N                            | 37.765  | 19.4926   | 8.25854    | 1         |
| cg23109867  | KCNQ4;KCNQ4                        | 0.00112369        | 0.00112369           | 3.84593            | 3.84593                      | T up vs N                              | 15.678  | 16.9944   | 17.3435    | 1         |
| cg23109894  | PKLR;PKLR                          | 8.11E-06          | 8.11E-06             | 0.052628           | -19.0012                     | T down vs N                            | 41.528  | 81.2054   | 31.2868    | 1         |
| cg23109897  | PRKDC;PRKDC                        | 4.98E-06          | 4.98E-06             | 0.326474           | -3.06304                     | T down vs N                            | 45.07   | 11.7365   | 4.16651    | 1         |
| cg23110514  | LCE3E                              | 0.00025232        | 0.000252316          | 0.247668           | -4.03766                     | T down vs N                            | 21.877  | 18.2442   | 13.343     | 1         |
| cg23112192  | ABHD15                             | 0.00011534        | 0.000115339          | 7.04027            | 7.04027                      | T up vs N                              | 25.631  | 35.675    | 22.2696    | 1         |
| cg23114262  | ADAM8;ADAM8;ADAM8                  | 0.00432576        | 0.00432576           | 0.310564           | -3.21995                     | T down vs N                            | 11.028  | 12.8074   | 18.5825    | 1         |
| cg23122570  | PLDN                               | 3.88E-05          | 3.88E-05             | 0.259283           | -3.85679                     | T down vs N                            | 31.517  | 17.0657   | 8.66367    | 1         |
| cg23123250  | SPNS2                              | 0.00039954        | 0.000399536          | 4.23784            | 4.23784                      | T up vs N                              | 19.842  | 19.5312   | 15.7497    | 1         |
| cg23124486  | RXR B                              | 0.00015103        | 0.000151028          | 0.313663           | -3.18814                     | T down vs N                            | 25.246  | 11.8502   | 7.04092    | 1         |
| cg23125492  | PAX6;PAX6;PAX6                     | 1.25E-05          | 1.25E-05             | 7.98364            | 7.98364                      | T up vs N                              | 38.557  | 40.4203   | 16.7731    | 1         |
| cg23130075  | ACY3                               | 0.00305819        | 0.00305819           | 0.32419            | -3.08461                     | T down vs N                            | 12.146  | 11.8841   | 15.655     | 1         |
| cg23131950  | AP2S1;AP2S1                        | 0.00010181        | 0.00010181           | 0.216287           | -4.6235                      | T down vs N                            | 26.265  | 21.9583   | 13.3765    | 1         |
| cg23133255  | NECAB1                             | 0.00047393        | 0.000473934          | 3.12212            | 3.12212                      | T up vs N                              | 19.115  | 12.1405   | 10.1619    | 1         |
| cg23139584  | RPS20;RPS20;SNORD54                | 0.00011708        | 0.000117075          | 0.215361           | -4.64336                     | T down vs N                            | 25.556  | 22.0814   | 13.8246    | 1         |
| cg23139887  | OR4E2                              | 0.00119447        | 0.00119447           | 0.231602           | -4.31776                     | T down vs N                            | 15.449  | 20.0398   | 20.7545    | 1         |
| cg23146663  | SPARC                              | 0.00011582        | 0.000115822          | 0.24179            | -4.13581                     | T down vs N                            | 25.61   | 18.8775   | 11.7937    | 1         |
| cg23147373  | ZBTB25                             | 2.13E-05          | 2.13E-05             | 0.332791           | -3.00489                     | T down vs N                            | 35.122  | 11.338    | 5.16514    | 1         |
| cg23149881  | IL1B                               | 1.55E-05          | 1.55E-05             | 0.291585           | -3.42953                     | T down vs N                            | 37.139  | 14.2259   | 6.12878    | 1         |
| cg23151413  | REG1A                              | 0.00024739        | 0.000247388          | 0.275864           | -3.62497                     | T down vs N                            | 21.967  | 15.5342   | 11.3144    | 1         |
| cg23152572  | PHYH;PHYH                          | 4.75E-05          | 4.75E-05             | 0.309115           | -3.23504                     | T down vs N                            | 30.366  | 12.9101   | 6.80245    | 1         |
| cg23156509  | PAX8;PAX8;PAX8;PAX8;PAX8;LOC440839 | 0.00330305        | 0.00330305           | 3.95645            | 3.95645                      | T up vs N                              | 11.893  | 17.7168   | 23.8347    | 1         |

| Probeset ID                               | UCSC_REFGENE_NAME              | p-value<br>(Type) | p-value (T vs.<br>N) | Ratio (T<br>vs. N) | Fold-<br>Change (T<br>vs. N) | Fold-Change (T vs.<br>N) (Description) | F(Type) | SS (Type) | SS (Error) | F (Error) |
|-------------------------------------------|--------------------------------|-------------------|----------------------|--------------------|------------------------------|----------------------------------------|---------|-----------|------------|-----------|
| cg23157618                                | ABCB9;ABCB9;ABCB9              | 0.00028475        | 0.000284754          | 0.270413           | -3.69804                     | T down vs N                            | 21.33   | 16.0194   | 12.0165    | 1         |
| cg23158189                                | GALNT9                         | 0.00016796        | 0.000167964          | 0.092638           | -10.7947                     | T down vs N                            | 23.782  | 53.0115   | 35.6649    | 1         |
| cg23160522                                | CYP1A1                         | 0.00012067        | 0.000120668          | 0.184836           | -5.41021                     | T down vs N                            | 25.404  | 26.6965   | 16.8138    | 1         |
| TNFSF13;TNFSF13;TNFSF13;TNFSF13;T         |                                |                   |                      |                    |                              |                                        |         |           |            |           |
| cg23161218                                | NFSF12-TNFSF13;TNFSF13;TNFSF13 | 0.0013056         | 0.0013056            | 0.301722           | -3.31431                     | T down vs N                            | 15.119  | 13.4479   | 14.2318    | 1         |
| cg23163200                                | C21orf62;C21orf62;C21orf62     | 2.16E-05          | 2.16E-05             | 0.313217           | -3.19268                     | T down vs N                            | 35.04   | 12.6218   | 5.76341    | 1         |
| cg23167456                                | FGR;FGR;FGR                    | 0.00047165        | 0.000471649          | 3.73868            | 3.73868                      | T up vs N                              | 19.136  | 16.2883   | 13.6193    | 1         |
| cg23171871                                | DOCK2                          | 0.00102663        | 0.00102663           | 3.9308             | 3.9308                       | T up vs N                              | 16.02   | 17.5496   | 17.5278    | 1         |
| cg23172664                                | NTSE                           | 6.93E-05          | 6.93E-05             | 0.261886           | -3.81845                     | T down vs N                            | 28.28   | 16.814    | 9.51296    | 1         |
| TSNAX-                                    |                                |                   |                      |                    |                              |                                        |         |           |            |           |
| DISC1;DISC1;DISC1;DISC1;TSNAX-            |                                |                   |                      |                    |                              |                                        |         |           |            |           |
| DISC1;DISC1;DISC1;DISC1;DISC1;TSNA        |                                |                   |                      |                    |                              |                                        |         |           |            |           |
| cg23172853                                | X-DISC1;DISC1;DIS              | 0.00151377        | 0.00151377           | 0.31085            | -3.21698                     | T down vs N                            | 14.578  | 12.7872   | 14.0346    | 1         |
| cg23172892                                | RHAG                           | 1.04E-05          | 1.04E-05             | 0.268895           | -3.71892                     | T down vs N                            | 39.823  | 16.1576   | 6.49183    | 1         |
| cg23174662                                | HIF1A;HIF1A                    | 0.00125738        | 0.00125738           | 0.296661           | -3.37085                     | T down vs N                            | 15.258  | 13.8303   | 14.5028    | 1         |
| cg23175533                                | KIAA1467                       | 0.0004794         | 0.000479398          | 0.332059           | -3.01151                     | T down vs N                            | 19.067  | 11.3834   | 9.55234    | 1         |
| cg23176214                                | MIR657;AATK;MIR338             | 8.36E-05          | 8.36E-05             | 5.46769            | 5.46769                      | T up vs N                              | 27.287  | 27.0318   | 15.8504    | 1         |
| cg23179181                                | CORO6                          | 0.00455641        | 0.00455641           | 3.32113            | 3.32113                      | T up vs N                              | 10.864  | 13.4941   | 19.8728    | 1         |
| cg23181133                                | CEACAM3                        | 3.66E-05          | 3.66E-05             | 0.172032           | -5.81287                     | T down vs N                            | 31.854  | 29.0151   | 14.5739    | 1         |
| cg23181282                                | SLC38A4;SLC38A4                | 3.74E-05          | 3.74E-05             | 0.274753           | -3.63964                     | T down vs N                            | 31.738  | 15.6318   | 7.8805     | 1         |
| cg23181311                                | LAMB2L                         | 4.21E-05          | 4.21E-05             | 0.251371           | -3.97819                     | T down vs N                            | 31.047  | 17.8583   | 9.2033     | 1         |
| cg23184042                                | DLX6AS                         | 0.0029797         | 0.0029797            | 0.282255           | -3.5429                      | T down vs N                            | 12.232  | 14.9867   | 19.6032    | 1         |
| cg23191950                                | ALDH1A3                        | 0.00624545        | 0.00624545           | 3.22558            | 3.22558                      | T up vs N                              | 9.8983  | 12.8457   | 20.7644    | 1         |
| cg23192918                                | MIR505                         | 0.00039631        | 0.000396313          | 0.317464           | -3.14996                     | T down vs N                            | 19.876  | 12.3306   | 9.92583    | 1         |
| cg23193497                                | PDE10A;PDE10A                  | 3.30E-06          | 3.30E-06             | 0.107821           | -9.27461                     | T down vs N                            | 48.236  | 46.4634   | 15.4121    | 1         |
| cg23194364                                | OR5E1P                         | 2.04E-05          | 2.04E-05             | 0.198935           | -5.02677                     | T down vs N                            | 35.389  | 24.4223   | 11.0419    | 1         |
| cg23194926                                | STX2;STX2                      | 0.00355491        | 0.00355491           | 6.88923            | 6.88923                      | T up vs N                              | 11.654  | 34.8865   | 47.8955    | 1         |
| cg23196346                                | KIAA1217;KIAA1217;KIAA1217     | 0.00015404        | 0.000154036          | 0.220219           | -4.54094                     | T down vs N                            | 24.2    | 21.4445   | 14.1781    | 1         |
| cg23202090                                | VXC3B                          | 1.16E-06          | 1.16E-06             | 0.319429           | -3.13059                     | T down vs N                            | 57.021  | 12.1984   | 3.42285    | 1         |
| cg23202913                                | RPS20;RPS20                    | 7.12E-05          | 7.12E-05             | 0.189451           | -5.27842                     | T down vs N                            | 28.137  | 25.9223   | 14.7408    | 1         |
| cg23205034                                | PGCP                           | 2.84E-06          | 2.84E-06             | 0.300849           | -3.32393                     | T down vs N                            | 49.415  | 13.5131   | 4.37539    | 1         |
| cg23206289                                | TEX101                         | 4.52E-06          | 4.52E-06             | 0.288286           | -3.46877                     | T down vs N                            | 45.808  | 14.4898   | 5.06112    | 1         |
| cg23206745                                | SCGB2A1                        | 0.00361227        | 0.00361227           | 0.32755            | -3.05297                     | T down vs N                            | 11.603  | 11.6675   | 16.0897    | 1         |
| cg23206761                                | C1orf38;C1orf38;C1orf38        | 0.00030261        | 0.000302611          | 0.25198            | -3.96858                     | T down vs N                            | 21.058  | 17.7958   | 13.5214    | 1         |
| cg23207527                                | RBM24;RBM24;RBM24              | 0.00279201        | 0.00279201           | 0.33105            | -3.02069                     | T down vs N                            | 12.448  | 11.4463   | 14.7121    | 1         |
| cg23208430                                | MS4A8B                         | 9.09E-06          | 9.09E-06             | 0.258093           | -3.87457                     | T down vs N                            | 40.728  | 17.1822   | 6.75       | 1         |
| cg23209285                                | AGAP1;AGAP1                    | 0.00031317        | 0.00031317           | 0.282365           | -3.54151                     | T down vs N                            | 20.905  | 14.9774   | 11.463     | 1         |
| cg23210521                                | BMPR1B                         | 0.00026211        | 0.000262107          | 0.313709           | -3.18767                     | T down vs N                            | 21.704  | 12.5877   | 9.2795     | 1         |
| cg23213892                                | SPATA21                        | 0.00018943        | 0.000189433          | 0.228235           | -4.38145                     | T down vs N                            | 23.209  | 20.4431   | 14.0934    | 1         |
| cg23214755                                | E2F6;E2F6;E2F6;E2F6;E2F6       | 0.00019448        | 0.000194481          | 0.168973           | -5.91811                     | T down vs N                            | 23.085  | 29.6096   | 20.5226    | 1         |
| cg23214840                                | APOB                           | 0.00097713        | 0.000977133          | 0.258404           | -3.86991                     | T down vs N                            | 16.209  | 17.1516   | 16.9308    | 1         |
| cg23216015                                | C7orf16;C7orf16                | 1.69E-06          | 1.69E-06             | 0.195418           | -5.11725                     | T down vs N                            | 53.754  | 24.9649   | 7.43087    | 1         |
| TRIM34;TRIM34;TRIM34;TRIM34;TRIM34;TRIM34 |                                |                   |                      |                    |                              |                                        |         |           |            |           |
| cg23217386                                | TRIM34;TRIM34                  | 0.00047933        | 0.000479326          | 0.287334           | -3.48027                     | T down vs N                            | 19.068  | 14.567    | 12.2235    | 1         |
| cg23217778                                | EBF3                           | 0.00020096        | 0.000200957          | 0.320374           | -3.12135                     | T down vs N                            | 22.93   | 12.1353   | 8.46756    | 1         |
| cg23218397                                | USH2A                          | 0.0001175         | 0.000117497          | 0.212713           | -4.70118                     | T down vs N                            | 25.538  | 22.4387   | 14.0582    | 1         |
| cg23218559                                | AMH                            | 0.00023231        | 0.000232314          | 6.22667            | 6.22667                      | T up vs N                              | 22.256  | 31.3266   | 22.521     | 1         |
| cg23219336                                | LELP1                          | 0.00039558        | 0.000395578          | 0.231613           | -4.31754                     | T down vs N                            | 19.884  | 20.0384   | 16.124     | 1         |
| cg23220346                                | MIR128-2;ARPP-21               | 0.00246301        | 0.00246301           | 4.42146            | 4.42146                      | T up vs N                              | 12.871  | 20.6954   | 25.7271    | 1         |
| cg23220637                                | HLA-DOA                        | 0.00013033        | 0.000130328          | 0.267282           | -3.74136                     | T down vs N                            | 25.021  | 16.306    | 10.4273    | 1         |
| cg23221090                                | NRBF2                          | 2.02E-05          | 2.02E-05             | 0.293875           | -3.4028                      | T down vs N                            | 35.438  | 14.0459   | 6.34165    | 1         |
| cg23222057                                | FHIT;FHIT                      | 0.00012236        | 0.000122357          | 0.199249           | -5.01884                     | T down vs N                            | 25.335  | 24.3746   | 15.3936    | 1         |
| cg23222406                                | POLR3B;POLR3B                  | 7.89E-07          | 7.89E-07             | 0.297143           | -3.36538                     | T down vs N                            | 60.601  | 13.7934   | 3.64173    | 1         |
| cg23224396                                | SAMD4A;SAMD4A                  | 0.00397605        | 0.00397605           | 0.209552           | -4.77208                     | T down vs N                            | 11.295  | 22.8749   | 32.4044    | 1         |
| cg23224752                                | NSD1;NSD1                      | 0.00068428        | 0.000684277          | 0.309166           | -3.23451                     | T down vs N                            | 17.606  | 12.9065   | 11.7292    | 1         |
| cg23225469                                | CLPB                           | 0.00017895        | 0.000178949          | 0.298868           | -3.34596                     | T down vs N                            | 23.479  | 13.6621   | 9.31021    | 1         |
| cg23229261                                | OTX1                           | 0.00090444        | 0.000904442          | 0.109276           | -9.15117                     | T down vs N                            | 16.507  | 45.9061   | 44.4976    | 1         |
| cg23230584                                | PON3                           | 1.54E-05          | 1.54E-05             | 9.75911            | 9.75911                      | T up vs N                              | 37.198  | 48.6123   | 20.9095    | 1         |
| cg23230830                                | LOC646627                      | 0.00019895        | 0.000198951          | 0.239924           | -4.16798                     | T down vs N                            | 22.978  | 19.0841   | 13.2889    | 1         |
| cg23232188                                | EAF2                           | 0.00015634        | 0.000156335          | 0.246245           | -4.06099                     | T down vs N                            | 24.128  | 18.3951   | 12.1982    | 1         |
| cg23234179                                | C12orf50                       | 4.88E-05          | 4.88E-05             | 0.291705           | -3.42812                     | T down vs N                            | 30.206  | 14.2165   | 7.53051    | 1         |
| cg23234828                                | FBXO34;FBXO34                  | 4.19E-05          | 4.19E-05             | 0.160571           | -6.22778                     | T down vs N                            | 31.071  | 31.3328   | 16.1349    | 1         |
| cg23235067                                | MGMT                           | 6.78E-06          | 6.78E-06             | 0.190888           | -5.23868                     | T down vs N                            | 42.806  | 25.6873   | 9.60139    | 1         |
| cg23237097                                | COPA;COPA                      | 0.00206038        | 0.00206038           | 0.328284           | -3.04614                     | T down vs N                            | 13.484  | 11.6208   | 13.789     | 1         |
| cg23237314                                | HCG4P6                         | 1.89E-05          | 1.89E-05             | 4.62509            | 4.62509                      | T up vs N                              | 35.868  | 21.9681   | 9.79954    | 1         |
| cg23238530                                | LEPREL1;LEPREL1                | 5.32E-05          | 5.32E-05             | 0.227602           | -4.39363                     | T down vs N                            | 29.729  | 20.52     | 11.0438    | 1         |
| cg23241448                                | NXN                            | 2.15E-05          | 2.15E-05             | 0.126589           | -7.8996                      | T down vs N                            | 35.072  | 40.0096   | 18.2526    | 1         |
| cg23242649                                | FER1L4                         | 2.96E-05          | 2.96E-05             | 0.267982           | -3.7316                      | T down vs N                            | 33.115  | 16.2415   | 7.84722    | 1         |

[illegible]

| Probeset ID                                                                             | UCSC_REFGENE_NAME             | p-value<br>(Type) | p-value (T vs.<br>N) | Ratio (T<br>vs. N) | Fold-<br>Change (T<br>vs. N) | Fold-Change (T vs.<br>N) (Description) | F(Type) | SS (Type) | SS (Error) | F (Error) |
|-----------------------------------------------------------------------------------------|-------------------------------|-------------------|----------------------|--------------------|------------------------------|----------------------------------------|---------|-----------|------------|-----------|
| cg23337631                                                                              | KRT72;KRT72;KRT72             | 9.09E-05          | 9.09E-05             | 4.25145            | 4.25145                      | T up vs N                              | 26.848  | 19.618    | 11.6913    | 1         |
| cg23337650                                                                              | PDZRN3                        | 0.00166858        | 0.00166858           | 0.216175           | -4.62588                     | T down vs N                            | 14.228  | 21.973    | 24.7101    | 1         |
| cg23338503                                                                              | DOCK2                         | 0.00188029        | 0.00188029           | 9.4293             | 9.4293                       | T up vs N                              | 13.804  | 47.1561   | 54.6577    | 1         |
| cg23339656                                                                              | ATG16L1;ATG16L1               | 0.0033913         | 0.0033913            | 0.277618           | -3.60207                     | T down vs N                            | 11.807  | 15.3817   | 20.8439    | 1         |
| cg23339709                                                                              | OR8U8;OR5M8                   | 0.00060632        | 0.000606316          | 0.29135            | -3.4323                      | T down vs N                            | 18.095  | 14.2446   | 12.5953    | 1         |
| cg23343066                                                                              | FER1L6                        | 0.00025628        | 0.000256281          | 0.289943           | -3.44895                     | T down vs N                            | 21.806  | 14.3566   | 10.534     | 1         |
| cg23344780                                                                              | EMP3                          | 6.06E-06          | 6.06E-06             | 0.158065           | -6.32651                     | T down vs N                            | 43.611  | 31.8739   | 11.6938    | 1         |
| cg23346516                                                                              | DNAH17                        | 0.00159499        | 0.00159499           | 0.313767           | -3.18707                     | T down vs N                            | 14.389  | 12.5836   | 13.9921    | 1         |
| cg23346801                                                                              | CFB                           | 0.00075854        | 0.00075854           | 0.297229           | -3.3644                      | T down vs N                            | 17.195  | 13.7868   | 12.8285    | 1         |
| PCDHGA4;PCDHGA6;PCDHGA1;PCDHGA5;PCDHGB1;PCDHGA3;PCDHGA2;PCDHGB4;PCDHGA7;PCDHGB2;PCDHGB4 |                               |                   |                      |                    |                              |                                        |         |           |            |           |
| cg23347399                                                                              | DHGB4;PCDHGA7;PCDHGB2;PCDHGB4 | 0.00117829        | 0.00117829           | 3.7928             | 3.7928                       | T up vs N                              | 15.5    | 16.6453   | 17.1823    | 1         |
| cg23347654                                                                              | BDKRB1                        | 9.44E-05          | 9.44E-05             | 0.236472           | -4.22884                     | T down vs N                            | 26.655  | 19.4737   | 11.6892    | 1         |
| cg23350273                                                                              | OR5H6                         | 1.64E-05          | 1.64E-05             | 0.274217           | -3.64674                     | T down vs N                            | 36.765  | 15.679    | 6.82342    | 1         |
| cg23351290                                                                              | CEACAM5                       | 5.17E-06          | 5.17E-06             | 0.303608           | -3.29372                     | T down vs N                            | 44.794  | 13.3084   | 4.75369    | 1         |
| cg23353432                                                                              | MMP9                          | 0.00462772        | 0.00462772           | 0.20146            | -4.96376                     | T down vs N                            | 10.816  | 24.0422   | 35.5659    | 1         |
| cg23355492                                                                              | SP6                           | 0.00035765        | 0.00035765           | 0.198676           | -5.03333                     | T down vs N                            | 20.321  | 24.4618   | 19.2602    | 1         |
| cg23357789                                                                              | PRTN3                         | 0.00021175        | 0.000211754          | 0.320377           | -3.12132                     | T down vs N                            | 22.686  | 12.1351   | 8.5588     | 1         |
| cg23361290                                                                              | AMDHD1                        | 6.43E-05          | 6.43E-05             | 4.17033            | 4.17033                      | T up vs N                              | 28.688  | 19.0992   | 10.6519    | 1         |
| cg23361969                                                                              | EHHADH;EHHADH                 | 2.30E-05          | 2.30E-05             | 0.267302           | -3.74109                     | T down vs N                            | 34.632  | 16.3042   | 7.53249    | 1         |
| cg23362884                                                                              | RBM20                         | 0.00011745        | 0.000117447          | 0.152157           | -6.57215                     | T down vs N                            | 25.54   | 33.2039   | 20.801     | 1         |
| cg23363039                                                                              | ANO2                          | 0.00148923        | 0.00148923           | 0.322786           | -3.09803                     | T down vs N                            | 14.637  | 11.9759   | 13.0909    | 1         |
| cg23363971                                                                              | IKZF4;IKZF4                   | 0.00130204        | 0.00130204           | 0.273334           | -3.65853                     | T down vs N                            | 15.129  | 15.7573   | 16.6647    | 1         |
| cg23364373                                                                              | C20orf166                     | 6.27E-05          | 6.27E-05             | 0.288063           | -3.47146                     | T down vs N                            | 28.827  | 14.5079   | 8.05247    | 1         |
| cg23367089                                                                              | PTPRN                         | 0.00014298        | 0.000142984          | 0.18501            | -5.40513                     | T down vs N                            | 24.563  | 26.6668   | 17.3701    | 1         |
| cg23369555                                                                              | CD3E                          | 0.00056354        | 0.000563535          | 0.290033           | -3.44788                     | T down vs N                            | 18.395  | 14.3494   | 12.4813    | 1         |
| cg23369564                                                                              | PLEKHO1                       | 0.00223845        | 0.00223845           | 0.235354           | -4.24891                     | T down vs N                            | 13.198  | 19.6018   | 23.7643    | 1         |
| cg23370360                                                                              | CRISP1;CRISP1                 | 4.20E-05          | 4.20E-05             | 0.183625           | -5.44587                     | T down vs N                            | 31.06   | 26.9047   | 13.8595    | 1         |
| cg23371746                                                                              | TBX15                         | 0.00250827        | 0.00250827           | 0.20876            | -4.7902                      | T down vs N                            | 12.809  | 22.9859   | 28.7123    | 1         |
| cg23372297                                                                              | PRB2                          | 2.89E-08          | 2.89E-08             | 0.216348           | -4.62219                     | T down vs N                            | 99.27   | 21.9501   | 3.53785    | 1         |
| cg23372684                                                                              | COL23A1                       | 0.00377855        | 0.00377855           | 3.31441            | 3.31441                      | T up vs N                              | 11.458  | 13.4486   | 18.7803    | 1         |
| cg23373888                                                                              | APOF                          | 2.52E-05          | 2.52E-05             | 0.308939           | -3.23689                     | T down vs N                            | 34.08   | 12.9226   | 6.06698    | 1         |
| cg23376821                                                                              | RUNX2;RUNX2;RUNX2             | 0.00532838        | 0.00532838           | 4.63714            | 4.63714                      | T up vs N                              | 10.38   | 22.0429   | 33.9784    | 1         |
| cg23383138                                                                              | SEC14L4;SEC14L4               | 0.00029117        | 0.000291172          | 0.221767           | -4.50923                     | T down vs N                            | 21.23   | 21.2463   | 16.0123    | 1         |
| cg23386659                                                                              | PRTN3                         | 5.93E-05          | 5.93E-05             | 0.244231           | -4.09449                     | T down vs N                            | 29.127  | 18.6114   | 10.2237    | 1         |
| cg23387692                                                                              | LOC728606                     | 1.70E-05          | 1.70E-05             | 0.220481           | -4.53553                     | T down vs N                            | 36.564  | 21.4107   | 9.3691     | 1         |
| cg23388392                                                                              | KRT37                         | 0.00117298        | 0.00117298           | 0.220895           | -4.52704                     | T down vs N                            | 15.517  | 21.3577   | 22.0227    | 1         |
| cg23389785                                                                              | ZDHHC14;ZDHHC14               | 3.04E-06          | 3.04E-06             | 0.218183           | -4.58332                     | T down vs N                            | 48.882  | 21.7086   | 7.10572    | 1         |
| cg23390920                                                                              | RMST                          | 0.00011959        | 0.000119589          | 0.296595           | -3.3716                      | T down vs N                            | 25.449  | 13.8354   | 8.69829    | 1         |
| cg23390958                                                                              | CADPS2;CADPS2;CADPS2          | 0.00035007        | 0.000350069          | 0.192756           | -5.1879                      | T down vs N                            | 20.415  | 25.386    | 19.8962    | 1         |
| cg23398109                                                                              | IFT20                         | 0.0007496         | 0.000749599          | 0.304704           | -3.28187                     | T down vs N                            | 17.242  | 13.2281   | 12.2751    | 1         |
| cg23398173                                                                              | MTPN;LUZP6                    | 0.0011274         | 0.0011274            | 0.270932           | -3.69096                     | T down vs N                            | 15.666  | 15.9725   | 16.3135    | 1         |
| cg23404877                                                                              | TGOLN2                        | 0.00016822        | 0.000168218          | 0.220864           | -4.52768                     | T down vs N                            | 23.775  | 21.3617   | 14.3761    | 1         |
| cg23404973                                                                              | PDLIM1                        | 7.69E-07          | 7.69E-07             | 0.208935           | -4.78618                     | T down vs N                            | 60.845  | 22.9613   | 6.03802    | 1         |
| cg23413307                                                                              | LCE1F                         | 0.00025611        | 0.000256108          | 0.238315           | -4.19613                     | T down vs N                            | 21.809  | 19.2645   | 14.1331    | 1         |
| cg23417306                                                                              | CWC22                         | 0.00720934        | 0.00720934           | 0.294793           | -3.39221                     | T down vs N                            | 9.472   | 13.9745   | 23.6056    | 1         |
| cg23418066                                                                              | F10                           | 0.00035012        | 0.000350121          | 0.205111           | -4.87542                     | T down vs N                            | 20.414  | 23.5063   | 18.4236    | 1         |
| cg23420841                                                                              | ATP6V1C1                      | 0.00605783        | 0.00605783           | 0.314565           | -3.17899                     | T down vs N                            | 9.9899  | 12.5285   | 20.0659    | 1         |
| cg23421390                                                                              | SEC23B;SEC23B;SEC23B          | 0.00191725        | 0.00191725           | 0.226259           | -4.41972                     | T down vs N                            | 13.736  | 20.6844   | 24.0943    | 1         |
| RNU5E;RNU5D;CKMT2;CKMT2;CKMT2;CKMT2;CKMT2;CKMT2                                         |                               |                   |                      |                    |                              |                                        |         |           |            |           |
| cg23425533                                                                              | ;CKMT2;CKMT2;CKMT2            | 3.67E-05          | 3.67E-05             | 4.19036            | 4.19036                      | T up vs N                              | 31.834  | 19.2276   | 9.66408    | 1         |
| cg23425735                                                                              | NEFL                          | 0.00050667        | 0.000506671          | 0.184516           | -5.41959                     | T down vs N                            | 18.835  | 26.7513   | 22.7243    | 1         |
| SLC26A5;SLC26A5;SLC26A5;SLC26A5;SLC26A5                                                 |                               |                   |                      |                    |                              |                                        |         |           |            |           |
| cg23426238                                                                              | LC26A5                        | 0.00056635        | 0.000566347          | 14.8478            | 14.8478                      | T up vs N                              | 18.374  | 68.1708   | 59.3618    | 1         |
| cg23426816                                                                              | MIR2110;C10orf118             | 0.0001704         | 0.000170401          | 0.301096           | -3.3212                      | T down vs N                            | 23.713  | 13.4946   | 9.10531    | 1         |
| cg23427912                                                                              | TRIML1                        | 1.52E-05          | 1.52E-05             | 0.147416           | -6.78353                     | T down vs N                            | 37.267  | 34.3298   | 14.739     | 1         |
| cg23432301                                                                              | FOXR2                         | 8.89E-05          | 8.89E-05             | 0.152208           | -6.56996                     | T down vs N                            | 26.965  | 33.1921   | 19.6947    | 1         |
| cg23434090                                                                              | OR51L1                        | 4.20E-05          | 4.20E-05             | 0.185435           | -5.39273                     | T down vs N                            | 31.056  | 26.5943   | 13.7012    | 1         |
| cg23437420                                                                              | NLRP6                         | 0.00030677        | 0.000306773          | 0.265671           | -3.76405                     | T down vs N                            | 20.997  | 16.4558   | 12.5395    | 1         |
| cg23441595                                                                              | NCF4;NCF4                     | 0.00014858        | 0.000148575          | 0.324703           | -3.07973                     | T down vs N                            | 24.376  | 11.8507   | 7.77868    | 1         |
| TRIM34;TRIM34;TRIM34;TRIM6-TRIM34;TRIM78P                                               |                               |                   |                      |                    |                              |                                        |         |           |            |           |
| cg23442112                                                                              | TRIM34;TRIM78P                | 0.00076486        | 0.000764857          | 0.284746           | -3.51191                     | T down vs N                            | 17.162  | 14.7792   | 13.7782    | 1         |
| cg23442981                                                                              | OR8S1                         | 1.21E-07          | 1.21E-07             | 0.128622           | -7.77473                     | T down vs N                            | 80.581  | 39.395    | 7.82217    | 1         |
| cg23443327                                                                              | TSPAN9;TSPAN9                 | 1.89E-05          | 1.89E-05             | 0.276607           | -3.61523                     | T down vs N                            | 35.87   | 15.4694   | 6.90017    | 1         |
| cg23444265                                                                              | GRIN2D                        | 4.23E-05          | 4.23E-05             | 5.85107            | 5.85107                      | T up vs N                              | 31.018  | 29.2314   | 15.0785    | 1         |
| cg23445255                                                                              | HSPC072;HSPC072;LOC100270804  | 9.64E-05          | 9.64E-05             | 0.285864           | -3.49816                     | T down vs N                            | 26.547  | 14.6871   | 8.85213    | 1         |
| cg23446438                                                                              | MYO1F                         | 2.14E-05          | 2.14E-05             | 0.211176           | -4.73538                     | T down vs N                            | 35.104  | 22.6494   | 10.3233    | 1         |
| cg23452259                                                                              | CDK5R2                        | 0.00011748        | 0.000117476          | 0.316904           | -3.15553                     | T down vs N                            | 25.539  | 12.3686   | 7.74886    | 1         |
| cg23452633                                                                              | C4orf14                       | 5.46E-06          | 5.46E-06             | 0.286738           | -3.48751                     | T down vs N                            | 44.386  | 14.6156   | 5.26853    | 1         |
| cg23456221                                                                              | WNT5A                         | 0.00315704        | 0.00315704           | 0.26198            | -3.81709                     | T down vs N                            | 12.041  | 16.805    | 22.33      | 1         |
| cg23460578                                                                              | MIR10B                        | 0.00029828        | 0.000298278          | 5.71915            | 5.71915                      | T up vs N                              | 21.122  | 28.4817   | 21.5748    | 1         |

| Probeset ID | UCSC_REFGENE_NAME                 | p-value<br>(Type) | p-value (T vs.<br>N) | Ratio (T<br>vs. N) | Fold-<br>Change (T<br>vs. N) | Fold-Change (T vs.<br>N) (Description) | F(Type) | SS (Type) | SS (Error) | F (Error) |
|-------------|-----------------------------------|-------------------|----------------------|--------------------|------------------------------|----------------------------------------|---------|-----------|------------|-----------|
|             | SLC26A5;SLC26A5;SLC26A5;SLC26A5;S |                   |                      |                    |                              |                                        |         |           |            |           |
| cg23461615  | LC26A5                            | 9.91E-06          | 9.91E-06             | 9.93444            | 9.93444                      | T up vs N                              | 40.131  | 49.3751   | 19.6854    | 1         |
| cg23461714  | TTC12                             | 7.73E-06          | 7.73E-06             | 15.7083            | 15.7083                      | T up vs N                              | 41.866  | 71.0474   | 27.1523    | 1         |
| cg23462514  | RNF212;RNF212                     | 3.54E-05          | 3.54E-05             | 7.13206            | 7.13206                      | T up vs N                              | 32.049  | 36.1502   | 18.0473    | 1         |
| cg23465465  | BTN3A2                            | 1.13E-05          | 1.13E-05             | 0.301673           | -3.31485                     | T down vs N                            | 39.249  | 13.4516   | 5.48363    | 1         |
| cg23471067  | BNIP3                             | 0.00273977        | 0.00273977           | 3.09559            | 3.09559                      | T up vs N                              | 12.512  | 11.9592   | 15.2936    | 1         |
| cg23473955  | ABHD15                            | 1.53E-05          | 1.53E-05             | 21.8746            | 21.8746                      | T up vs N                              | 37.242  | 89.1588   | 38.3047    | 1         |
|             | IRAK4;PUS7L;IRAK4;PUS7L;PUS7L;IRA |                   |                      |                    |                              |                                        |         |           |            |           |
| cg23474723  | K4;IRAK4;IRAK4                    | 0.0001333         | 0.0001333            | 0.29969            | -3.33679                     | T down vs N                            | 24.909  | 13.6001   | 8.73592    | 1         |
| cg23476401  | H19                               | 8.87E-05          | 8.87E-05             | 3.20328            | 3.20328                      | T up vs N                              | 26.976  | 12.694    | 7.52895    | 1         |
| cg23476447  | SNORD115-39                       | 0.00036992        | 0.000369918          | 0.21607            | -4.62814                     | T down vs N                            | 20.174  | 21.9871   | 17.4376    | 1         |
| cg23477967  | TFPI;TFPI;TFPI;TFPI               | 0.00055754        | 0.000557536          | 0.255679           | -3.91116                     | T down vs N                            | 18.439  | 17.4215   | 15.1172    | 1         |
| cg23478605  | KIR2DL1;KIR3DP1                   | 0.00016532        | 0.000165315          | 0.31124            | -3.21295                     | T down vs N                            | 23.859  | 12.7598   | 8.557      | 1         |
| cg23482746  | C15orf27                          | 1.90E-06          | 1.90E-06             | 0.301817           | -3.31326                     | T down vs N                            | 52.739  | 13.4409   | 4.07769    | 1         |
| cg23484159  | C14orf43;C14orf43                 | 0.00018402        | 0.000184023          | 4.07364            | 4.07364                      | T up vs N                              | 23.346  | 18.4768   | 12.663     | 1         |
| cg23484358  | PIGZ                              | 0.00160386        | 0.00160386           | 3.22615            | 3.22615                      | T up vs N                              | 14.37   | 12.8496   | 14.3076    | 1         |
| cg23484599  | PAX6;PAX6;PAX6                    | 0.00613117        | 0.00613117           | 0.257012           | -3.89087                     | T down vs N                            | 9.9537  | 17.2888   | 27.7907    | 1         |
| cg23485307  | TGFBF2;TGFBF2                     | 0.0003521         | 0.000352104          | 0.322895           | -3.09698                     | T down vs N                            | 20.389  | 11.9687   | 9.3921     | 1         |
| cg23485564  | ASB12                             | 0.00372635        | 0.00372635           | 0.24142            | -4.14215                     | T down vs N                            | 11.502  | 18.9183   | 26.3158    | 1         |
| cg23489038  | CUX2                              | 1.22E-05          | 1.22E-05             | 0.229486           | -4.35756                     | T down vs N                            | 38.727  | 20.292    | 8.38365    | 1         |
| cg23493016  | SORCS3                            | 7.26E-05          | 7.26E-05             | 15.1403            | 15.1403                      | T up vs N                              | 28.035  | 69.1601   | 39.4705    | 1         |
| cg23493119  | OR10G2                            | 1.41E-05          | 1.41E-05             | 0.306618           | -3.26139                     | T down vs N                            | 37.773  | 13.0891   | 5.54428    | 1         |
| cg23493167  | IHH                               | 1.71E-05          | 1.71E-05             | 0.264023           | -3.78755                     | T down vs N                            | 36.501  | 16.6107   | 7.28121    | 1         |
| cg23493867  | SYNPO2;SYNPO2;SYNPO2              | 6.81E-06          | 6.81E-06             | 0.263504           | -3.79501                     | T down vs N                            | 42.767  | 16.6598   | 6.2327     | 1         |
| cg23496571  | HCK                               | 2.01E-06          | 2.01E-06             | 0.164937           | -6.06293                     | T down vs N                            | 52.274  | 30.4203   | 9.311      | 1         |
| cg23497016  | MEIS1                             | 0.00267145        | 0.00267145           | 0.250199           | -3.99682                     | T down vs N                            | 12.596  | 17.9794   | 22.8377    | 1         |
| cg23497020  | LIMA1;LIMA1;LIMA1                 | 0.00400256        | 0.00400256           | 0.266574           | -3.7513                      | T down vs N                            | 11.274  | 16.3716   | 23.2355    | 1         |
|             | LOC1511174;LOC643387;LOC151174    |                   |                      |                    |                              |                                        |         |           |            |           |
| cg23497383  | SSB                               | 0.00010308        | 0.000103077          | 38.1392            | 38.1392                      | T up vs N                              | 26.202  | 124.183   | 75.8319    | 1         |
| cg23497644  | POM121L12;POM121L12               | 0.00050769        | 0.000507689          | 0.223557           | -4.47313                     | T down vs N                            | 18.827  | 21.0202   | 17.8638    | 1         |
| cg23498518  | SCML4                             | 0.00051349        | 0.000513491          | 0.218504           | -4.57658                     | T down vs N                            | 18.78   | 21.6667   | 18.4597    | 1         |
| cg23503775  | CSF1R                             | 0.00010436        | 0.000104358          | 0.305076           | -3.27787                     | T down vs N                            | 26.139  | 13.2009   | 8.08057    | 1         |
| cg23505299  | GPR81                             | 3.33E-05          | 3.33E-05             | 0.254962           | -3.92216                     | T down vs N                            | 32.407  | 17.4933   | 8.63686    | 1         |
| cg23505823  | ADAMTS7                           | 2.07E-05          | 2.07E-05             | 0.164971           | -6.06168                     | T down vs N                            | 35.299  | 30.4134   | 13.7854    | 1         |
| cg23506979  | HEPH1                             | 0.00010093        | 0.000100932          | 0.219701           | -4.55164                     | T down vs N                            | 26.309  | 21.5113   | 13.0821    | 1         |
| cg23507834  | C18orf1;C18orf1                   | 0.00011112        | 0.000111119          | 0.258616           | -3.86674                     | T down vs N                            | 25.82   | 17.1309   | 10.6157    | 1         |
| cg23508887  | SUNC1;SUNC1;SUNC1;SUNC1           | 0.00187114        | 0.00187114           | 0.307833           | -3.24851                     | T down vs N                            | 13.821  | 13.0016   | 15.0512    | 1         |
| cg23509098  | PTPRN2;PTPRN2;PTPRN2              | 1.98E-05          | 1.98E-05             | 0.191609           | -5.21896                     | T down vs N                            | 35.571  | 25.5704   | 11.5017    | 1         |
| cg23509665  | ADMT;MIOX                         | 0.00390713        | 0.00390713           | 4.55312            | 4.55312                      | T up vs N                              | 11.351  | 21.5205   | 30.336     | 1         |
| cg23513727  | BHMT                              | 1.40E-06          | 1.40E-06             | 0.297827           | -3.35765                     | T down vs N                            | 55.39   | 13.7412   | 3.96932    | 1         |
| cg23514016  | GXYLT1;GXYLT1                     | 2.22E-05          | 2.22E-05             | 16.4372            | 16.4372                      | T up vs N                              | 34.875  | 73.4071   | 33.6775    | 1         |
| cg23514543  | OSMR;OSMR                         | 0.00099766        | 0.000997659          | 0.274847           | -3.63839                     | T down vs N                            | 16.129  | 15.6235   | 15.4984    | 1         |
| cg23516451  | VIPR1                             | 6.81E-05          | 6.81E-05             | 0.319279           | -3.13206                     | T down vs N                            | 28.38   | 12.2084   | 6.88272    | 1         |
| cg23517013  | SMPX                              | 8.95E-05          | 8.95E-05             | 3.4529             | 3.4529                       | T up vs N                              | 26.932  | 14.3831   | 8.54481    | 1         |
| cg23518228  | FGF22                             | 7.40E-05          | 7.40E-05             | 0.221083           | -4.52318                     | T down vs N                            | 27.93   | 21.3336   | 12.2214    | 1         |
| cg23518439  | CAPZB                             | 9.13E-05          | 9.13E-05             | 0.267589           | -3.73708                     | T down vs N                            | 26.824  | 16.2777   | 9.70941    | 1         |
| cg23519022  | AMPD1                             | 0.00046704        | 0.000467036          | 0.2985             | -3.35009                     | T down vs N                            | 19.177  | 13.69     | 11.4221    | 1         |
| cg23523368  | NLRP11;NLRP4;NLRP11               | 2.46E-05          | 2.46E-05             | 0.187314           | -5.33864                     | T down vs N                            | 34.231  | 26.277    | 12.2822    | 1         |
| cg23523534  | ZIM3                              | 0.00135745        | 0.00135745           | 0.285608           | -3.5013                      | T down vs N                            | 14.975  | 14.7081   | 15.7144    | 1         |
| cg23526980  | CNKSR3                            | 5.14E-05          | 5.14E-05             | 0.259992           | -3.84627                     | T down vs N                            | 29.915  | 16.9967   | 9.09053    | 1         |
| cg23528791  | SOX6;SOX6;SOX6;SOX6               | 1.95E-05          | 1.95E-05             | 0.28477            | -3.5116                      | T down vs N                            | 35.685  | 14.7772   | 6.62562    | 1         |
| cg23530266  | MS4A12;MS4A12                     | 0.00226668        | 0.00226668           | 0.258979           | -3.86132                     | T down vs N                            | 13.154  | 17.0954   | 20.7935    | 1         |
| cg23532119  | MYO7A;MYO7A;MYO7A                 | 6.53E-05          | 6.53E-05             | 0.197853           | -5.05425                     | T down vs N                            | 28.605  | 24.5875   | 13.7529    | 1         |
| cg23533513  | GAA;GAA;GAA                       | 3.08E-05          | 3.08E-05             | 5.67406            | 5.67406                      | T up vs N                              | 32.871  | 28.2236   | 13.738     | 1         |
| cg23534315  | KCP;KCP                           | 6.33E-06          | 6.33E-06             | 0.281781           | -3.54885                     | T down vs N                            | 43.301  | 15.0265   | 5.55241    | 1         |
| cg23537419  | C2;C2;CFB                         | 0.00013781        | 0.000137806          | 0.329268           | -3.03704                     | T down vs N                            | 24.745  | 11.5584   | 7.4737     | 1         |
| cg23538064  | GBP3                              | 0.00043905        | 0.000439049          | 0.293027           | -3.41265                     | T down vs N                            | 19.439  | 14.1123   | 11.616     | 1         |
| cg23540651  | PKD1L3                            | 0.00023906        | 0.000239061          | 0.291437           | -3.43127                     | T down vs N                            | 22.124  | 14.2377   | 10.2965    | 1         |
| cg23541811  | NECAB1                            | 7.82E-08          | 7.82E-08             | 0.285189           | -3.50644                     | T down vs N                            | 85.907  | 14.7426   | 2.74579    | 1         |
| cg23542075  | GPR26                             | 3.92E-05          | 3.92E-05             | 0.331006           | -3.02109                     | T down vs N                            | 31.458  | 11.4491   | 5.82313    | 1         |
| cg23545828  | HOXD3                             | 6.92E-05          | 6.92E-05             | 0.206286           | -4.84764                     | T down vs N                            | 28.292  | 23.3371   | 13.198     | 1         |
| cg23547017  | ARSD                              | 6.80E-05          | 6.80E-05             | 6.30717            | 6.30717                      | T up vs N                              | 28.384  | 31.7683   | 17.9075    | 1         |
| cg23547143  | HIF3A;HIF3A;HIF3A                 | 4.75E-05          | 4.75E-05             | 0.18505            | -5.40395                     | T down vs N                            | 30.358  | 26.6599   | 14.0509    | 1         |
| cg23548163  | PARD3                             | 0.0051029         | 0.0051029            | 3.46652            | 3.46652                      | T up vs N                              | 10.513  | 14.4747   | 22.0303    | 1         |
| cg23548374  | MREG                              | 0.00018326        | 0.000183256          | 0.296654           | -3.37093                     | T down vs N                            | 23.366  | 13.8309   | 9.47083    | 1         |
| cg23550034  | HOBX3                             | 6.86E-05          | 6.86E-05             | 0.292873           | -3.41445                     | T down vs N                            | 28.335  | 14.1244   | 7.97556    | 1         |
| cg23551720  | C2orf34                           | 4.67E-06          | 4.67E-06             | 6.83125            | 6.83125                      | T up vs N                              | 45.546  | 34.5816   | 12.1482    | 1         |
| cg23552047  | CFH;CFH                           | 3.33E-05          | 3.33E-05             | 0.216804           | -4.61247                     | T down vs N                            | 32.406  | 21.8898   | 10.8078    | 1         |
| cg23557926  | RAD21                             | 5.36E-05          | 5.36E-05             | 0.226278           | -4.41935                     | T down vs N                            | 29.688  | 20.6821   | 11.1463    | 1         |
| cg23559636  |                                   | 0.00181212        | 0.00181212           | 0.331637           | -3.01535                     | T down vs N                            | 13.934  | 11.4097   | 13.1012    | 1         |

| Probeset ID                                                     | UCSC_REFGENE_NAME             | p-value<br>(Type) | p-value (T vs.<br>N) | Ratio (T<br>vs. N) | Fold-<br>Change (T<br>vs. N) | Fold-Change (T vs.<br>N) (Description) | F(Type) | SS (Type) | SS (Error) | F (Error) |
|-----------------------------------------------------------------|-------------------------------|-------------------|----------------------|--------------------|------------------------------|----------------------------------------|---------|-----------|------------|-----------|
| PCDHGA4;PCDHGA9;PCDHGA1;PCDHG<br>B1;PCDHGB7;PCDHGB6;PCDHGB7;PCD |                               |                   |                      |                    |                              |                                        |         |           |            |           |
| cg23563234                                                      | HGB3;PCDHGA6;PCDHGA8;PCDHGA1  | 0.00141325        | 0.00141325           | 3.85251            | 3.85251                      | T up vs N                              | 14.828  | 17.0376   | 18.3844    | 1         |
| cg23563443                                                      | SORBS3                        | 0.00175651        | 0.00175651           | 3.55055            | 3.55055                      | T up vs N                              | 14.045  | 15.0378   | 17.1313    | 1         |
| cg23571170                                                      | OR8D1                         | 0.00060566        | 0.000605661          | 0.289201           | -3.45781                     | T down vs N                            | 18.1    | 14.4161   | 12.7439    | 1         |
| cg23581186                                                      | KRTAP21-2                     | 0.00035028        | 0.00035028           | 0.329952           | -3.03075                     | T down vs N                            | 20.412  | 11.5153   | 9.02624    | 1         |
| cg23586322                                                      | COL14A1                       | 3.56E-06          | 3.56E-06             | 28.0899            | 28.0899                      | T up vs N                              | 47.628  | 104.198   | 35.0041    | 1         |
| cg23587288                                                      | SLC30A3                       | 0.00079739        | 0.000797386          | 0.265925           | -3.76046                     | T down vs N                            | 16.998  | 16.4321   | 15.4672    | 1         |
| cg23587449                                                      | LRAT                          | 0.00027241        | 0.000272414          | 5.63659            | 5.63659                      | T up vs N                              | 21.53   | 28.0087   | 20.8151    | 1         |
| cg23588713                                                      | ESYT1                         | 0.00425872        | 0.00425872           | 0.240981           | -4.14971                     | T down vs N                            | 11.077  | 18.9668   | 27.3968    | 1         |
| cg23589045                                                      | EPS15                         | 0.00725387        | 0.00725387           | 0.257133           | -3.88903                     | T down vs N                            | 9.4539  | 17.2768   | 29.2397    | 1         |
| cg23590187                                                      | LOC646762                     | 0.00166784        | 0.00166784           | 0.285417           | -3.50365                     | T down vs N                            | 14.229  | 14.7238   | 16.5561    | 1         |
| cg23591609                                                      | BEST3                         | 0.00037693        | 0.000376928          | 0.242861           | -4.11758                     | T down vs N                            | 20.093  | 18.7602   | 14.9387    | 1         |
| cg23592735                                                      | DST;DST;DST;DST               | 0.00375821        | 0.00375821           | 0.270972           | -3.69042                     | T down vs N                            | 11.475  | 15.9689   | 22.2661    | 1         |
| cg23594656                                                      | TPST1                         | 0.00677254        | 0.00677254           | 0.329366           | -3.03614                     | T down vs N                            | 9.6566  | 11.5522   | 19.1409    | 1         |
| cg23596291                                                      | PLEKHN1;PLEKHN1               | 1.58E-06          | 1.58E-06             | 0.142049           | -7.03981                     | T down vs N                            | 54.313  | 35.6726   | 10.5087    | 1         |
| cg23597057                                                      | KCNN3;KCNN3                   | 9.62E-05          | 9.62E-05             | 9.51546            | 9.51546                      | T up vs N                              | 26.554  | 47.5393   | 28.6443    | 1         |
| cg23597629                                                      | ACTA1                         | 0.00357484        | 0.00357484           | 4.56373            | 4.56373                      | T up vs N                              | 11.636  | 21.5866   | 29.6822    | 1         |
| cg23602832                                                      | NOTCH4                        | 0.00053787        | 0.000537827          | 0.32794            | -3.04934                     | T down vs N                            | 18.588  | 11.6427   | 10.022     | 1         |
| cg23605027                                                      | CR2;CR2                       | 0.00029037        | 0.00029037           | 0.307412           | -3.25296                     | T down vs N                            | 21.242  | 13.0319   | 9.81575    | 1         |
| cg23605333                                                      | LMOD2                         | 0.0002222         | 0.000222199          | 0.281442           | -3.55314                     | T down vs N                            | 22.462  | 15.0551   | 10.7241    | 1         |
| BLCAP;BLCAP;BLCAP;BLCAP;NNAT;NN                                 |                               |                   |                      |                    |                              |                                        |         |           |            |           |
| cg23605670                                                      | AT;BLCAP                      | 3.86E-05          | 3.86E-05             | 4.29423            | 4.29423                      | T up vs N                              | 31.548  | 19.8903   | 10.0876    | 1         |
| cg23606244                                                      | ORS1E2                        | 0.00060522        | 0.000605215          | 0.29939            | -3.34012                     | T down vs N                            | 18.103  | 13.6227   | 12.0404    | 1         |
| cg23606421                                                      | ENTPD8;ENTPD8                 | 0.00026913        | 0.000269126          | 0.211581           | -4.72631                     | T down vs N                            | 21.584  | 22.5936   | 16.7482    | 1         |
| cg23609450                                                      | WFDC10B;WFDC10B               | 0.00023783        | 0.000237833          | 0.199545           | -5.01141                     | T down vs N                            | 22.148  | 24.3299   | 17.5763    | 1         |
| cg23612570                                                      | SRD5A2                        | 2.63E-05          | 2.63E-05             | 0.184693           | -5.41438                     | T down vs N                            | 33.817  | 26.7209   | 12.6427    | 1         |
| cg23613030                                                      | GPR111                        | 6.58E-05          | 6.58E-05             | 0.319983           | -3.12516                     | T down vs N                            | 28.566  | 12.1613   | 6.8116     | 1         |
| cg23613857                                                      | REM2                          | 5.63E-05          | 5.63E-05             | 0.240593           | -4.1564                      | T down vs N                            | 29.413  | 19.0098   | 10.3409    | 1         |
| PCDHGB4;PCDHGA4;PCDHGA6;PCDHG<br>A1;PCDHGA5;PCDHGB1;PCDHGA3;PC  |                               |                   |                      |                    |                              |                                        |         |           |            |           |
| cg23614852                                                      | DHGA2;PCDHGA7;PCDHGB2;PCDHGB4 | 0.00074208        | 0.000742082          | 3.02962            | 3.02962                      | T up vs N                              | 17.282  | 11.5076   | 10.6538    | 1         |
| cg23617848                                                      | GPR133                        | 0.00014528        | 0.000145276          | 0.203391           | -4.91664                     | T down vs N                            | 24.486  | 23.7568   | 15.5238    | 1         |
| cg23619769                                                      | PHOX2A                        | 2.26E-07          | 2.26E-07             | 12.0155            | 12.0155                      | T up vs N                              | 73.349  | 57.8938   | 12.6286    | 1         |
| cg23621097                                                      | HIC1;HIC1                     | 0.00064265        | 0.00064265           | 3.55979            | 3.55979                      | T up vs N                              | 17.859  | 15.0996   | 13.528     | 1         |
| cg23622369                                                      | HSD17B1                       | 6.06E-05          | 6.06E-05             | 7.44214            | 7.44214                      | T up vs N                              | 29.006  | 37.7333   | 20.8139    | 1         |
| cg23623251                                                      | BMP6                          | 0.00161865        | 0.00161865           | 0.328452           | -3.04458                     | T down vs N                            | 14.337  | 11.6101   | 12.9572    | 1         |
| cg23626961                                                      | C17orf64                      | 8.60E-05          | 8.60E-05             | 0.22663            | -4.41248                     | T down vs N                            | 27.139  | 20.6388   | 12.168     | 1         |
| cg23628437                                                      | PSD3                          | 0.00048443        | 0.000484433          | 0.322695           | -3.0989                      | T down vs N                            | 19.023  | 11.9818   | 10.0777    | 1         |
| cg23629150                                                      | TOP1MT                        | 0.00096644        | 0.000966444          | 0.18392            | -5.43714                     | T down vs N                            | 16.251  | 26.8538   | 26.4392    | 1         |
| cg23631321                                                      | LRRK1                         | 0.00027213        | 0.000272125          | 0.308612           | -3.24031                     | T down vs N                            | 21.534  | 12.9459   | 9.61883    | 1         |
| cg23631538                                                      | DENND2D                       | 3.40E-06          | 3.40E-06             | 0.278741           | -3.58755                     | T down vs N                            | 48.006  | 15.2849   | 5.09433    | 1         |
| cg23633330                                                      | CD55;CD55                     | 3.92E-06          | 3.92E-06             | 0.240544           | -4.15725                     | T down vs N                            | 46.894  | 19.0153   | 6.48795    | 1         |
| PRKAR1B;PRKAR1B;PRKAR1B;PRKAR1                                  |                               |                   |                      |                    |                              |                                        |         |           |            |           |
| cg23634193                                                      | B;PRKAR1B;PRKAR1B             | 0.00718849        | 0.00718849           | 0.232974           | -4.29232                     | T down vs N                            | 9.4805  | 19.8782   | 33.548     | 1         |
| cg23634322                                                      | C20orf24;C20orf24;C20orf24    | 8.74E-06          | 8.74E-06             | 0.217113           | -4.6059                      | T down vs N                            | 41.003  | 21.849    | 8.5258     | 1         |
| cg23642392                                                      | SLC2A9                        | 1.02E-05          | 1.02E-05             | 0.229268           | -4.36171                     | T down vs N                            | 39.907  | 20.3183   | 8.14632    | 1         |
| cg23643375                                                      | SP6                           | 0.00069778        | 0.000697779          | 0.272303           | -3.67238                     | T down vs N                            | 17.528  | 15.8493   | 14.4679    | 1         |
| cg23643435                                                      | GALM;GALM                     | 0.00022716        | 0.000227155          | 0.229925           | -4.34924                     | T down vs N                            | 22.36   | 20.2393   | 14.4828    | 1         |
| cg23644457                                                      | OR8U8                         | 9.47E-05          | 9.47E-05             | 0.211142           | -4.73614                     | T down vs N                            | 26.635  | 22.6541   | 13.6087    | 1         |
| cg23644589                                                      | OBSCN;OBSCN                   | 0.00010336        | 0.000103364          | 0.226129           | -4.42225                     | T down vs N                            | 26.188  | 20.7004   | 12.6475    | 1         |
| cg23646360                                                      | SYCP2L                        | 0.00010712        | 0.000107115          | 0.272876           | -3.66467                     | T down vs N                            | 26.006  | 15.7981   | 9.71975    | 1         |
| cg23647640                                                      | FLJ43860                      | 1.23E-05          | 1.23E-05             | 0.312652           | -3.19845                     | T down vs N                            | 38.645  | 12.6611   | 5.24205    | 1         |
| cg23649083                                                      | SORCS2                        | 6.35E-05          | 6.35E-05             | 0.279465           | -3.57827                     | T down vs N                            | 28.754  | 15.223    | 8.47061    | 1         |
| cg23651976                                                      | TCEA3                         | 7.41E-06          | 7.41E-06             | 0.094789           | -10.5498                     | T down vs N                            | 42.168  | 51.9938   | 19.7281    | 1         |
| cg23652093                                                      | MAP6;MAP6                     | 0.00012138        | 0.000121379          | 0.251555           | -3.97528                     | T down vs N                            | 25.375  | 17.8394   | 11.2485    | 1         |
| cg23652859                                                      | MGC2752                       | 0.00087962        | 0.000879618          | 4.54559            | 4.54559                      | T up vs N                              | 16.614  | 21.4736   | 20.6795    | 1         |
| cg23654597                                                      | EIF2AK1;EIF2AK1               | 0.00070221        | 0.000702205          | 0.329386           | -3.03595                     | T down vs N                            | 17.502  | 11.5509   | 10.5595    | 1         |
| cg23655615                                                      | WNT7A                         | 0.00111391        | 0.00111391           | 0.277175           | -3.60783                     | T down vs N                            | 15.711  | 15.4201   | 15.7039    | 1         |
| cg23656110                                                      | LOC284837                     | 2.47E-05          | 2.47E-05             | 0.251658           | -3.97365                     | T down vs N                            | 34.202  | 17.8288   | 8.34056    | 1         |
| cg23657179                                                      | C10orf41;C10orf41             | 9.33E-05          | 9.33E-05             | 5.97586            | 5.97586                      | T up vs N                              | 26.713  | 29.934    | 17.9291    | 1         |
| cg23657393                                                      | JPH2                          | 1.27E-05          | 1.27E-05             | 0.273934           | -3.65051                     | T down vs N                            | 38.457  | 15.7041   | 6.53369    | 1         |
| cg23657707                                                      | ABCA7                         | 1.87E-05          | 1.87E-05             | 0.067515           | -14.8116                     | T down vs N                            | 35.94   | 68.0473   | 30.2936    | 1         |
| cg23659307                                                      | HBE1                          | 0.00611377        | 0.00611377           | 0.276845           | -3.61213                     | T down vs N                            | 9.9623  | 15.4487   | 24.8116    | 1         |
| cg23660197                                                      | MICB                          | 4.86E-05          | 4.86E-05             | 0.315493           | -3.16965                     | T down vs N                            | 30.238  | 12.4649   | 6.59553    | 1         |
| cg23660356                                                      | PPT2;PPT2                     | 0.00062889        | 0.000628891          | 0.32605            | -3.06702                     | T down vs N                            | 17.947  | 11.7637   | 10.4878    | 1         |
| ADARB1;ADARB1;ADARB1;ADARB1;A                                   |                               |                   |                      |                    |                              |                                        |         |           |            |           |
| cg23662138                                                      | DARB1;ADARB1;ADARB1           | 0.00584495        | 0.00584495           | 0.319534           | -3.12956                     | T down vs N                            | 10.098  | 12.1913   | 19.317     | 1         |
| cg23663298                                                      | INCENP;INCENP                 | 0.00058667        | 0.00058667           | 0.282777           | -3.53635                     | T down vs N                            | 18.23   | 14.9429   | 13.1152    | 1         |
| cg23665080                                                      | NLRP4                         | 0.00379208        | 0.00379208           | 0.213287           | -4.68851                     | T down vs N                            | 11.446  | 22.3606   | 31.2567    | 1         |

| Probeset ID                     | UCSC_REFGENE_NAME            | p-value<br>(Type) | p-value (T vs.<br>N) | Ratio (T<br>vs. N) | Fold-<br>Change (T<br>vs. N) | Fold-Change (T vs.<br>N) (Description) | F(Type) | SS (Type) | SS (Error) | F (Error) |
|---------------------------------|------------------------------|-------------------|----------------------|--------------------|------------------------------|----------------------------------------|---------|-----------|------------|-----------|
| MIR19A;MIR17HG;MIR92A1;MIR17HG  |                              |                   |                      |                    |                              |                                        |         |           |            |           |
| cg23665802                      | ;MIR20A;MIR17;MIR19B1;MIR18A | 4.34E-05          | 4.34E-05             | 0.180136           | -5.55136                     | T down vs N                            | 30.879  | 27.5172   | 14.2579    | 1         |
| cg23668004                      | FOXK1                        | 0.00699781        | 0.00699781           | 0.331824           | -3.01365                     | T down vs N                            | 9.5598  | 11.3981   | 19.0768    | 1         |
| cg23668057                      | SYNGR2                       | 6.16E-05          | 6.16E-05             | 0.174357           | -5.73534                     | T down vs N                            | 28.918  | 28.5741   | 15.81      | 1         |
| cg23669611                      | RTN4RL1                      | 4.47E-05          | 4.47E-05             | 10.448             | 10.448                       | T up vs N                              | 30.705  | 51.5666   | 26.8705    | 1         |
| cg23670353                      | FGGY;FGGY                    | 2.60E-07          | 2.60E-07             | 0.206908           | -4.83307                     | T down vs N                            | 71.849  | 23.2481   | 5.17708    | 1         |
| cg23675441                      | LOC100130000                 | 0.00178966        | 0.00178966           | 0.265656           | -3.76427                     | T down vs N                            | 13.979  | 16.4572   | 18.8372    | 1         |
| cg23675587                      | RAD51L1;RAD51L1;RAD51L1      | 0.00435772        | 0.00435772           | 0.315126           | -3.17333                     | T down vs N                            | 11.004  | 12.49     | 18.1601    | 1         |
| cg23676480                      | ACSS1                        | 0.00125605        | 0.00125605           | 0.290811           | -3.43866                     | T down vs N                            | 15.262  | 14.2874   | 14.9784    | 1         |
| cg23679756                      | ASAM                         | 0.00023867        | 0.000238672          | 3.90415            | 3.90415                      | T up vs N                              | 22.132  | 17.3757   | 12.5617    | 1         |
| cg23681745                      | CFLAR;CFLAR;CFLAR            | 0.00046867        | 0.000468674          | 4.28521            | 4.28521                      | T up vs N                              | 19.162  | 19.833    | 16.5601    | 1         |
| cg23683588                      | PAX9                         | 0.00183623        | 0.00183623           | 5.42275            | 5.42275                      | T up vs N                              | 13.888  | 26.7698   | 30.8416    | 1         |
| cg23685969                      | ASCC1;C10orf104              | 8.29E-06          | 8.29E-06             | 0.281965           | -3.54654                     | T down vs N                            | 41.367  | 15.011    | 5.80592    | 1         |
| cg23689219                      | OR10J1                       | 2.42E-06          | 2.42E-06             | 0.096822           | -10.3283                     | T down vs N                            | 50.713  | 51.0614   | 16.1101    | 1         |
| cg23691006                      | SLC43A2                      | 6.74E-05          | 6.74E-05             | 0.29156            | -3.42982                     | T down vs N                            | 28.434  | 14.2279   | 8.00614    | 1         |
| cg23693487                      | PPP2CB;PPP2CB                | 3.67E-05          | 3.67E-05             | 0.143989           | -6.94497                     | T down vs N                            | 31.848  | 35.1785   | 17.6734    | 1         |
| cg23695211                      | PRR5;PRR5;PRR5;PRR5          | 0.00203851        | 0.00203851           | 0.329586           | -3.03411                     | T down vs N                            | 13.521  | 11.5384   | 13.6536    | 1         |
| cg23696248                      | BLC3                         | 0.00111791        | 0.00111791           | 3.11919            | 3.11919                      | T up vs N                              | 15.697  | 12.1205   | 12.3541    | 1         |
| cg23696949                      | LAMC2;LAMC2                  | 7.47E-05          | 7.47E-05             | 3.34722            | 3.34722                      | T up vs N                              | 27.881  | 13.6707   | 7.84529    | 1         |
| cg23697997                      | ADAMTSL5                     | 0.00163575        | 0.00163575           | 0.215478           | -4.64085                     | T down vs N                            | 14.299  | 22.0658   | 24.691     | 1         |
| cg23699926                      | ASCL4;ASCL4                  | 3.05E-05          | 3.05E-05             | 0.305878           | -3.26928                     | T down vs N                            | 32.94   | 13.1426   | 6.38374    | 1         |
| cg23700513                      | HLA-H                        | 0.00118482        | 0.00118482           | 4.17028            | 4.17028                      | T up vs N                              | 15.479  | 19.0989   | 19.7413    | 1         |
| cg23703963                      | CRIP1;CRIP1                  | 0.00069762        | 0.000697615          | 6.64077            | 6.64077                      | T up vs N                              | 17.529  | 33.5712   | 30.6437    | 1         |
| cg23704802                      | WWP1                         | 8.15E-07          | 8.15E-07             | 0.16254            | -6.15232                     | T down vs N                            | 60.292  | 30.9165   | 8.2045     | 1         |
| cg23706836                      | ANGPT2;ANGPT2;ANGPT2;MCPH1   | 0.00292448        | 0.00292448           | 0.332413           | -3.00831                     | T down vs N                            | 12.294  | 11.3615   | 14.7863    | 1         |
| cg23708288                      | DLG3;DLG3;DLG3               | 0.00352794        | 0.00352794           | 3.34898            | 3.34898                      | T up vs N                              | 11.679  | 13.6825   | 18.745     | 1         |
| cg23708624                      | CCDC146;FGL2                 | 9.39E-06          | 9.39E-06             | 0.267037           | -3.7448                      | T down vs N                            | 40.504  | 16.3287   | 6.45022    | 1         |
| cg23709617                      | KNDC1                        | 0.00537188        | 0.00537188           | 0.181749           | -5.50209                     | T down vs N                            | 10.355  | 27.2317   | 42.0779    | 1         |
| cg23710823                      | P704P                        | 0.00151666        | 0.00151666           | 0.311824           | -3.20693                     | T down vs N                            | 14.571  | 12.7189   | 13.9662    | 1         |
| cg23712018                      | RNF39;RNF39                  | 0.00202611        | 0.00202611           | 5.30807            | 5.30807                      | T up vs N                              | 13.543  | 26.0971   | 30.8328    | 1         |
| cg23713772                      | OR4D6                        | 1.76E-07          | 1.76E-07             | 0.157034           | -6.36805                     | T down vs N                            | 76.147  | 32.1005   | 6.74498    | 1         |
| cg23715582                      | LAD1                         | 0.00320275        | 0.00320275           | 3.08467            | 3.08467                      | T up vs N                              | 11.994  | 11.8845   | 15.8539    | 1         |
| cg23715728                      | MICA                         | 0.00018543        | 0.000185429          | 0.225694           | -4.43078                     | T down vs N                            | 23.31   | 20.7541   | 14.2457    | 1         |
| cg23716141                      | SEPT9;SEPT9;SEPT9            | 0.00442608        | 0.00442608           | 0.294568           | -3.3948                      | T down vs N                            | 10.955  | 13.9919   | 20.4348    | 1         |
| cg23716866                      | CLIC5                        | 7.17E-05          | 7.17E-05             | 0.291874           | -3.42613                     | T down vs N                            | 28.104  | 14.2031   | 8.08611    | 1         |
| cg23719124                      | GSTM5;GSTM5                  | 0.00046447        | 0.000464468          | 4.25539            | 4.25539                      | T up vs N                              | 19.2    | 19.6431   | 16.3691    | 1         |
| cg23719132                      | ATP11A;ATP11A                | 0.0056274         | 0.0056274            | 0.291988           | -3.4248                      | T down vs N                            | 10.213  | 14.1941   | 22.237     | 1         |
| cg23721586                      | TGFBR3                       | 1.77E-05          | 1.77E-05             | 0.197083           | -5.07401                     | T down vs N                            | 36.294  | 24.7061   | 10.8916    | 1         |
| cg23722529                      | ARHGAP6;ARHGAP6              | 0.00208993        | 0.00208993           | 4.63198            | 4.63198                      | T up vs N                              | 13.435  | 22.0108   | 26.2138    | 1         |
| cg23724738                      | LCE3E                        | 4.05E-05          | 4.05E-05             | 0.159302           | -6.27739                     | T down vs N                            | 31.266  | 31.6052   | 16.1737    | 1         |
| cg23724935                      | SFRS4                        | 0.00100899        | 0.00100899           | 0.247748           | -4.03636                     | T down vs N                            | 16.086  | 18.2358   | 18.1382    | 1         |
| cg23725454                      | GSTP1                        | 0.00034322        | 0.000343224          | 0.287372           | -3.4798                      | T down vs N                            | 20.501  | 14.5639   | 11.3663    | 1         |
| cg23729407                      | SH3BP4                       | 0.00030397        | 0.000303972          | 3.60717            | 3.60717                      | T up vs N                              | 21.038  | 15.4157   | 11.7242    | 1         |
| cg23731805                      | ERBB3;ERBB3                  | 0.00136143        | 0.00136143           | 3.04434            | 3.04434                      | T up vs N                              | 14.965  | 11.6084   | 12.4116    | 1         |
| cg23732024                      | LY96                         | 7.57E-05          | 7.57E-05             | 0.165422           | -6.04515                     | T down vs N                            | 27.81   | 30.3213   | 17.4445    | 1         |
| cg23732629                      | HLA-DRA                      | 0.00238827        | 0.00238827           | 0.217891           | -4.58944                     | T down vs N                            | 12.976  | 21.7467   | 26.8156    | 1         |
| cg23732845                      | AIM1L                        | 0.00549297        | 0.00549297           | 3.2952             | 3.2952                       | T up vs N                              | 10.287  | 13.3185   | 20.7157    | 1         |
| cg23737407                      | BCOR;BCOR                    | 1.30E-06          | 1.30E-06             | 0.231267           | -4.324                       | T down vs N                            | 56.055  | 20.0794   | 5.73134    | 1         |
| cg23737713                      | NDUFB4;NDUFB4                | 0.00038576        | 0.000385761          | 0.238195           | -4.19824                     | T down vs N                            | 19.993  | 19.278    | 15.428     | 1         |
| cg23739046                      | POP7                         | 3.51E-05          | 3.51E-05             | 0.210181           | -4.7578                      | T down vs N                            | 32.107  | 22.7872   | 11.3556    | 1         |
| cg23740882                      | WFDC2                        | 3.48E-06          | 3.48E-06             | 13.5227            | 13.5227                      | T up vs N                              | 47.816  | 63.5284   | 21.2578    | 1         |
| cg23741006                      | TCN1                         | 2.29E-07          | 2.29E-07             | 0.095927           | -10.4246                     | T down vs N                            | 73.211  | 51.4681   | 11.2481    | 1         |
| cg23743845                      | HLA-DQB2                     | 0.00043784        | 0.000437838          | 0.240775           | -4.15326                     | T down vs N                            | 19.45   | 18.9896   | 15.6211    | 1         |
| cg23744182                      | GPX5;GPX5                    | 0.00125991        | 0.00125991           | 0.221703           | -4.51053                     | T down vs N                            | 15.251  | 21.2545   | 22.299     | 1         |
| cg23749637                      | NXN                          | 0.00013458        | 0.000134581          | 0.209748           | -4.76762                     | T down vs N                            | 24.862  | 22.8475   | 14.7038    | 1         |
| cg23750206                      | AFAP1;AFAP1                  | 0.00276658        | 0.00276658           | 0.322526           | -3.10053                     | T down vs N                            | 12.479  | 11.993    | 15.3769    | 1         |
| cg23752828                      | DCTN2                        | 1.52E-05          | 1.52E-05             | 0.188447           | -5.30654                     | T down vs N                            | 37.263  | 26.0881   | 11.2018    | 1         |
| APBB2;APBB2;APBB2;APBB2;APBB2;A |                              |                   |                      |                    |                              |                                        |         |           |            |           |
| cg23753351                      | PBB2;APBB2                   | 0.00125236        | 0.00125236           | 0.203283           | -4.91924                     | T down vs N                            | 15.273  | 23.7726   | 24.9045    | 1         |
| cg23754934                      | MS4A4A                       | 1.14E-05          | 1.14E-05             | 0.166539           | -6.00459                     | T down vs N                            | 39.155  | 30.0948   | 12.2977    | 1         |
| cg23756442                      | TRIM27                       | 0.002371          | 0.002371             | 0.317275           | -3.15184                     | T down vs N                            | 13      | 12.3434   | 15.1915    | 1         |
| cg23761497                      | TSSC1                        | 0.00012908        | 0.000129083          | 0.298342           | -3.35186                     | T down vs N                            | 25.068  | 13.702    | 8.74546    | 1         |
| cg23763873                      | AN09                         | 0.00021859        | 0.000218593          | 0.320359           | -3.1215                      | T down vs N                            | 22.538  | 12.1363   | 8.61586    | 1         |
| cg23765993                      | SPINLW1;SPINLW1              | 0.00231923        | 0.00231923           | 0.319311           | -3.13174                     | T down vs N                            | 13.076  | 12.2062   | 14.936     | 1         |
| cg23767994                      | DLX6AS                       | 9.80E-05          | 9.80E-05             | 5.53555            | 5.53555                      | T up vs N                              | 26.461  | 27.4258   | 16.5836    | 1         |
| cg23770887                      | NUS1                         | 1.35E-05          | 1.35E-05             | 0.225981           | -4.42515                     | T down vs N                            | 38.055  | 20.7187   | 8.71096    | 1         |
| cg23771185                      | OR8S1                        | 0.00549533        | 0.00549533           | 0.269039           | -3.71693                     | T down vs N                            | 10.285  | 16.1445   | 25.1145    | 1         |
| cg23771661                      | B3GNT3                       | 1.37E-05          | 1.37E-05             | 0.227798           | -4.38984                     | T down vs N                            | 37.938  | 20.4961   | 8.64394    | 1         |
| cg23774016                      | OR10J3                       | 3.02E-05          | 3.02E-05             | 0.227964           | -4.38666                     | T down vs N                            | 32.986  | 20.476    | 9.93213    | 1         |
| cg23777956                      | CREB3L3;CREB3L3              | 0.00023191        | 0.000231905          | 0.332612           | -3.00651                     | T down vs N                            | 22.264  | 11.3491   | 8.15601    | 1         |
| cg23781276                      | KNDC1                        | 0.00037592        | 0.000375918          | 3.17819            | 3.17819                      | T up vs N                              | 20.105  | 12.5231   | 9.96636    | 1         |

| Probeset ID                        | UCSC_REFGENE_NAME             | p-value<br>(Type) | p-value (T vs.<br>N) | Ratio (T<br>vs. N) | Fold-<br>Change (T<br>vs. N) | Fold-Change (T vs.<br>N) (Description) | F(Type) | SS (Type) | SS (Error) | F (Error) |
|------------------------------------|-------------------------------|-------------------|----------------------|--------------------|------------------------------|----------------------------------------|---------|-----------|------------|-----------|
| cg23783862                         | CHMP4C                        | 0.0021054         | 0.0021054            | 0.325309           | -3.074                       | T down vs N                            | 13.409  | 11.8115   | 14.0937    | 1         |
| cg23785275                         | HLA-DQB2                      | 0.00139385        | 0.00139385           | 0.288935           | -3.46099                     | T down vs N                            | 14.878  | 14.4376   | 15.5259    | 1         |
| cg23791626                         | PITPNC1;PITPNC1               | 0.00232681        | 0.00232681           | 0.300583           | -3.32687                     | T down vs N                            | 13.065  | 13.533    | 16.5736    | 1         |
| cg23793213                         | RNF39;RNF39                   | 0.00112555        | 0.00112555           | 4.52288            | 4.52288                      | T up vs N                              | 16.117  | 20.0769   | 18.6861    | 1         |
| cg23796755                         | KIRREL3;KIRREL3               | 9.80E-06          | 9.80E-06             | 0.214417           | -4.6638                      | T down vs N                            | 40.207  | 22.2079   | 8.83739    | 1         |
| cg23799901                         | GPR37                         | 0.00231153        | 0.00231153           | 10.1108            | 10.1108                      | T up vs N                              | 13.087  | 50.1347   | 61.2931    | 1         |
| cg23800435                         | C1orf210;C1orf210             | 0.00567996        | 0.00567996           | 3.16388            | 3.16388                      | T up vs N                              | 10.185  | 12.4255   | 19.5202    | 1         |
| cg23801028                         | CRTAC1                        | 1.51E-05          | 1.51E-05             | 0.267337           | -3.7406                      | T down vs N                            | 37.313  | 16.301    | 6.9899     | 1         |
| cg23803431                         | CRYBB2                        | 4.58E-05          | 4.58E-05             | 0.276848           | -3.61209                     | T down vs N                            | 30.573  | 15.4485   | 8.08476    | 1         |
| cg23804666                         | GLYATL1                       | 0.00105834        | 0.00105834           | 0.265444           | -3.76727                     | T down vs N                            | 15.904  | 16.477    | 16.5761    | 1         |
| cg23809103                         | ASB15                         | 0.00642289        | 0.00642289           | 0.275278           | -3.6327                      | T down vs N                            | 9.8144  | 15.5856   | 25.4086    | 1         |
| cg23809813                         | RNLS;RNLS                     | 6.83E-06          | 6.83E-06             | 0.322257           | -3.10311                     | T down vs N                            | 42.75   | 12.0106   | 4.49518    | 1         |
| cg23812948                         | C1orf159                      | 3.14E-05          | 3.14E-05             | 0.126721           | -7.89138                     | T down vs N                            | 32.754  | 39.9692   | 19.5245    | 1         |
| cg23815491                         | HP;HP                         | 0.00031375        | 0.000313745          | 0.321508           | -3.11034                     | T down vs N                            | 20.897  | 12.0601   | 9.23379    | 1         |
| cg23821329                         | VIM                           | 0.00036529        | 0.000365289          | 0.263912           | -3.78914                     | T down vs N                            | 20.229  | 16.6211   | 13.1463    | 1         |
| cg23823833                         | SCHIP1                        | 7.08E-06          | 7.08E-06             | 0.208363           | -4.79933                     | T down vs N                            | 42.488  | 23.0418   | 8.67708    | 1         |
| cg23824762                         | NEURL3                        | 2.60E-05          | 2.60E-05             | 0.244225           | -4.09459                     | T down vs N                            | 33.901  | 18.612    | 8.78425    | 1         |
| cg23825344                         | FAM129A                       | 1.96E-05          | 1.96E-05             | 0.28715            | -3.48251                     | T down vs N                            | 35.638  | 14.582    | 6.54671    | 1         |
| cg23829024                         | HIST1H1A                      | 0.00036995        | 0.000369954          | 20.5139            | 20.5139                      | T up vs N                              | 20.174  | 85.4856   | 67.7988    | 1         |
| cg23829990                         | UNC50                         | 0.00064927        | 0.000649265          | 0.189994           | -5.26331                     | T down vs N                            | 17.817  | 25.833    | 23.198     | 1         |
| cg23831898                         | HLA-DQB2                      | 0.00014171        | 0.000141711          | 0.219611           | -4.55351                     | T down vs N                            | 24.607  | 21.523    | 13.9945    | 1         |
| cg23832497                         | C6orf170                      | 0.00010279        | 0.000102789          | 0.293028           | -3.41264                     | T down vs N                            | 26.216  | 14.1122   | 8.61288    | 1         |
| cg23834013                         | ZC3HAV1                       | 0.0008874         | 0.000887395          | 0.299158           | -3.34272                     | T down vs N                            | 16.58   | 13.6402   | 13.1629    | 1         |
| cg23840053                         | FGFBP1                        | 4.71E-05          | 4.71E-05             | 0.181516           | -5.50916                     | T down vs N                            | 30.41   | 27.2728   | 14.3492    | 1         |
| cg23840812                         | PLD5                          | 1.03E-05          | 1.03E-05             | 0.127505           | -7.8428                      | T down vs N                            | 39.882  | 39.7307   | 15.9392    | 1         |
| cg23844115                         | C6orf218                      | 0.00044674        | 0.00044674           | 0.301056           | -3.32164                     | T down vs N                            | 19.365  | 13.4976   | 11.1523    | 1         |
| cg23844325                         | SLAMF7                        | 0.00079475        | 0.000794749          | 0.268442           | -3.7252                      | T down vs N                            | 17.011  | 16.1992   | 15.2363    | 1         |
| cg23845609                         | FAM180B                       | 0.00041136        | 0.000411363          | 0.305256           | -3.27594                     | T down vs N                            | 19.716  | 13.1878   | 10.702     | 1         |
| cg23846400                         | URB1;MRAP                     | 0.00014949        | 0.000149493          | 0.318495           | -3.13977                     | T down vs N                            | 24.346  | 12.261    | 8.05791    | 1         |
| cg23847069                         | RAP1GAP2;RAP1GAP2             | 0.0011259         | 0.0011259            | 4.08616            | 4.08616                      | T up vs N                              | 15.671  | 18.5577   | 18.9477    | 1         |
| cg23849777                         | SRPX;SRPX;SRPX;SRPX           | 5.74E-05          | 5.74E-05             | 0.27785            | -3.59906                     | T down vs N                            | 29.305  | 15.3617   | 8.38726    | 1         |
| cg23852348                         | PDGFD;PDGFD                   | 4.90E-06          | 4.90E-06             | 0.247342           | -4.04298                     | T down vs N                            | 45.192  | 18.2786   | 6.47139    | 1         |
| cg23852781                         | MUC5B                         | 0.00029179        | 0.00029179           | 0.252212           | -3.96493                     | T down vs N                            | 21.221  | 17.772    | 13.3999    | 1         |
| cg23855093                         | GPR128                        | 0.00045127        | 0.000451265          | 0.279545           | -3.57724                     | T down vs N                            | 19.322  | 15.2161   | 12.6       | 1         |
| cg23860325                         | HPVC1                         | 0.00018249        | 0.000182486          | 0.296385           | -3.37399                     | T down vs N                            | 23.386  | 13.8515   | 9.47686    | 1         |
| cg23861617                         | TMEM150C                      | 1.14E-06          | 1.14E-06             | 0.219636           | -4.55299                     | T down vs N                            | 57.236  | 21.5197   | 6.01575    | 1         |
| cg23864180                         | ADARB2                        | 0.0050765         | 0.0050765            | 0.321177           | -3.11354                     | T down vs N                            | 10.529  | 12.0819   | 18.3606    | 1         |
| cg23864632                         | PRKD2;PRKD2;PRKD2             | 0.00270979        | 0.00270979           | 0.126926           | -7.8786                      | T down vs N                            | 12.85   | 37.5591   | 43.845     | 1         |
| cg23865240                         | HOXA1;HOXA1                   | 3.47E-05          | 3.47E-05             | 13.3414            | 13.3414                      | T up vs N                              | 32.168  | 62.8713   | 31.2715    | 1         |
| cg23865597                         | DYM                           | 0.00104397        | 0.00104397           | 0.233678           | -4.2794                      | T down vs N                            | 15.956  | 19.796    | 19.8503    | 1         |
| cg23866133                         | TJP3                          | 4.52E-05          | 4.52E-05             | 0.126695           | -7.893                       | T down vs N                            | 30.639  | 39.9772   | 20.8768    | 1         |
| cg23866687                         | MAML2                         | 3.13E-05          | 3.13E-05             | 0.105268           | -9.49957                     | T down vs N                            | 32.767  | 47.4688   | 23.1786    | 1         |
| cg23867673                         | CDH23;CDH23                   | 2.21E-05          | 2.21E-05             | 0.304032           | -3.28913                     | T down vs N                            | 34.883  | 13.2773   | 6.09001    | 1         |
| cg23868143                         | AP1G2                         | 0.0004449         | 0.000444902          | 0.27567            | -3.62753                     | T down vs N                            | 19.382  | 15.5513   | 12.8375    | 1         |
| cg23868809                         | TMEM67;TMEM67;TMEM67          | 5.90E-06          | 5.90E-06             | 0.259283           | -3.85679                     | T down vs N                            | 43.816  | 17.0657   | 6.23171    | 1         |
| cg23870181                         | HLA-DQA2                      | 0.00670402        | 0.00670402           | 0.325572           | -3.07152                     | T down vs N                            | 9.6868  | 11.7945   | 19.4814    | 1         |
| cg23874561                         | PRDM8;PRDM8                   | 2.04E-05          | 2.04E-05             | 29.3358            | 29.3358                      | T up vs N                              | 35.38   | 106.927   | 48.3568    | 1         |
| cg23877625                         | MYO1F                         | 0.00042897        | 0.000428972          | 0.301234           | -3.31967                     | T down vs N                            | 19.537  | 13.4843   | 11.0429    | 1         |
| NUP62;ATF5;NUP62;NUP62;IL4I1;NUP62 |                               |                   |                      |                    |                              |                                        |         |           |            |           |
| cg23878206                         | 62                            | 0.00081312        | 0.000813119          | 0.228636           | -4.37376                     | T down vs N                            | 16.921  | 20.3945   | 19.2841    | 1         |
| cg23878241                         | PPTC7                         | 0.00014977        | 0.000149767          | 0.215222           | -4.64636                     | T down vs N                            | 24.337  | 22.1      | 14.5294    | 1         |
| cg23878264                         | TAAR5                         | 6.38E-05          | 6.38E-05             | 0.276026           | -3.62285                     | T down vs N                            | 28.727  | 15.5201   | 8.64429    | 1         |
| cg23878404                         | KRTAP1-5                      | 5.01E-05          | 5.01E-05             | 0.271691           | -3.68065                     | T down vs N                            | 30.065  | 15.9042   | 8.46384    | 1         |
| cg23882545                         | CASP8;CASP8;CASP8;CASP8;CASP8 | 3.41E-07          | 3.41E-07             | 0.176758           | -5.65747                     | T down vs N                            | 68.94   | 28.1285   | 6.52825    | 1         |
| cg23884076                         | CXCL10;ART3                   | 0.00270788        | 0.00270788           | 0.307509           | -3.25194                     | T down vs N                            | 12.551  | 13.0249   | 16.6044    | 1         |
| cg23884241                         | HOXA4                         | 0.00318376        | 0.00318376           | 3.60054            | 3.60054                      | T up vs N                              | 12.014  | 15.3715   | 20.4722    | 1         |
| cg23886141                         | FPR3                          | 0.0024457         | 0.0024457            | 0.313249           | -3.19235                     | T down vs N                            | 12.895  | 12.6195   | 15.6586    | 1         |
| cg23886776                         | HEXDC                         | 0.00132611        | 0.00132611           | 0.268985           | -3.71768                     | T down vs N                            | 15.061  | 16.1494   | 17.1559    | 1         |
| cg23889236                         | EPS8L2                        | 2.43E-05          | 2.43E-05             | 16.1656            | 16.1656                      | T up vs N                              | 34.311  | 72.5358   | 33.8251    | 1         |
| cg23889607                         | INS-IGF2;IGF2;IGF2;IGF2       | 0.00013993        | 0.000139928          | 0.270825           | -3.69242                     | T down vs N                            | 24.67   | 15.9821   | 10.3656    | 1         |
| cg23889730                         | PRIMA1                        | 0.0022146         | 0.0022146            | 3.00795            | 3.00795                      | T up vs N                              | 13.234  | 11.359    | 13.7328    | 1         |
| cg23891487                         | SOCS2                         | 0.00056431        | 0.000564312          | 0.116507           | -8.58317                     | T down vs N                            | 18.389  | 43.2872   | 37.6633    | 1         |
| KCNIP4;KCNIP4;KCNIP4;KCNIP4;KCNIP4 |                               |                   |                      |                    |                              |                                        |         |           |            |           |
| cg23893620                         | 4                             | 5.41E-05          | 5.41E-05             | 0.170439           | -5.86719                     | T down vs N                            | 29.633  | 29.3225   | 15.8322    | 1         |
| cg23898497                         | PVT1                          | 1.24E-05          | 1.24E-05             | 0.266487           | -3.75253                     | T down vs N                            | 38.615  | 16.3798   | 6.78691    | 1         |
| cg23899409                         | LILRA4                        | 0.00626264        | 0.00626264           | 0.31504            | -3.1742                      | T down vs N                            | 9.89    | 12.4959   | 20.2157    | 1         |
| cg23900681                         | ATG2B                         | 0.00282845        | 0.00282845           | 0.221507           | -4.51454                     | T down vs N                            | 12.405  | 21.2796   | 27.4462    | 1         |
| cg23901444                         | ARHGAP22;ARHGAP22             | 0.00373138        | 0.00373138           | 0.134609           | -7.42892                     | T down vs N                            | 11.498  | 37.6665   | 52.4148    | 1         |
| cg23903244                         | KCNQ1;KCNQ1                   | 1.98E-05          | 1.98E-05             | 6.49718            | 6.49718                      | T up vs N                              | 35.576  | 32.8005   | 14.7517    | 1         |
| cg23906454                         | LACE1                         | 5.33E-05          | 5.33E-05             | 0.165684           | -6.03557                     | T down vs N                            | 29.712  | 30.2679   | 16.2992    | 1         |
| cg23907051                         | TBC1D8                        | 0.00014465        | 0.000144652          | 0.282848           | -3.53547                     | T down vs N                            | 24.507  | 14.937    | 9.75212    | 1         |

| Probeset ID                                                                             | UCSC_REFGENE_NAME            | p-value<br>(Type) | p-value (T vs.<br>N) | Ratio (T<br>vs. N) | Fold-<br>Change (T<br>vs. N) | Fold-Change (T vs.<br>N) (Description) | F(Type) | SS (Type) | SS (Error) | F (Error) |
|-----------------------------------------------------------------------------------------|------------------------------|-------------------|----------------------|--------------------|------------------------------|----------------------------------------|---------|-----------|------------|-----------|
| RAB3IP;RAB3IP;RAB3IP;RAB3IP;RAB3IP                                                      |                              |                   |                      |                    |                              |                                        |         |           |            |           |
| cg23907053                                                                              | P                            | 9.39E-06          | 9.39E-06             | 0.30072            | -3.32535                     | T down vs N                            | 40.505  | 13.5227   | 5.3416     | 1         |
| cg23907926                                                                              | STX2;STX2                    | 0.0029909         | 0.0029909            | 7.7883             | 7.7883                       | T up vs N                              | 12.22   | 39.4621   | 51.6706    | 1         |
| cg23908638                                                                              | GABBR1;GABBR1;GABBR1         | 3.57E-05          | 3.57E-05             | 0.298466           | -3.35046                     | T down vs N                            | 33.519  | 12.8871   | 5.7671     | 1         |
| cg23908943                                                                              | MIR524                       | 0.00078564        | 0.00078564           | 0.299037           | -3.34407                     | T down vs N                            | 17.057  | 13.6493   | 12.8039    | 1         |
| cg23915769                                                                              | LVRN                         | 0.00037473        | 0.000374726          | 6.92821            | 6.92821                      | T up vs N                              | 20.118  | 35.0908   | 27.9075    | 1         |
| cg23916679                                                                              | UGT2B4                       | 0.00085366        | 0.000853656          | 0.288137           | -3.47057                     | T down vs N                            | 16.731  | 14.5019   | 13.8683    | 1         |
| cg23918296                                                                              | AMN                          | 0.00568744        | 0.00568744           | 5.88905            | 5.88905                      | T up vs N                              | 10.181  | 29.4459   | 46.2771    | 1         |
| cg23921487                                                                              | SNRNP35;SNRNP35;SNRNP35      | 0.00093731        | 0.000937311          | 0.213661           | -4.68031                     | T down vs N                            | 16.369  | 22.3099   | 21.8075    | 1         |
| cg23924526                                                                              | PRKCE                        | 0.00107144        | 0.00107144           | 0.304698           | -3.28194                     | T down vs N                            | 15.858  | 13.2286   | 13.3473    | 1         |
| cg23924801                                                                              | OR2G3                        | 0.00279621        | 0.00279621           | 0.307693           | -3.24999                     | T down vs N                            | 12.443  | 13.0117   | 16.7308    | 1         |
| cg23926367                                                                              | KIAA0090                     | 0.00435926        | 0.00435926           | 0.311362           | -3.21169                     | T down vs N                            | 11.003  | 12.7513   | 18.5419    | 1         |
| cg23927744                                                                              | PSG6;PSG6                    | 8.04E-05          | 8.04E-05             | 0.314652           | -3.17811                     | T down vs N                            | 27.489  | 12.5226   | 7.28867    | 1         |
| cg23928165                                                                              | PNMAL2;PNMAL2                | 6.83E-05          | 6.83E-05             | 8.00983            | 8.00983                      | T up vs N                              | 28.361  | 40.5479   | 22.8753    | 1         |
| cg23930334                                                                              | SLC22A20                     | 0.00648721        | 0.00648721           | 0.22601            | -4.42459                     | T down vs N                            | 9.7847  | 20.7151   | 33.8737    | 1         |
| PLEKHB1;PLEKHB1;PLEKHB1;PLEKHB1;                                                        |                              |                   |                      |                    |                              |                                        |         |           |            |           |
| cg23931323                                                                              | PLEKHB1                      | 0.00103656        | 0.00103656           | 3.62929            | 3.62929                      | T up vs N                              | 15.983  | 15.5629   | 15.5792    | 1         |
| cg23932491                                                                              | EMX2OS                       | 3.55E-05          | 3.55E-05             | 0.129776           | -7.70558                     | T down vs N                            | 32.031  | 39.0526   | 19.5074    | 1         |
| cg23935420                                                                              | TIGD3                        | 1.95E-05          | 1.95E-05             | 3.17882            | 3.17882                      | T up vs N                              | 35.666  | 12.5274   | 5.61987    | 1         |
| cg23936766                                                                              | GALNT2                       | 0.0001464         | 0.0001464            | 0.280729           | -3.56216                     | T down vs N                            | 24.448  | 15.1154   | 9.89232    | 1         |
| cg23938483                                                                              | C14orf43;C14orf43            | 4.60E-06          | 4.60E-06             | 6.00346            | 6.00346                      | T up vs N                              | 45.659  | 30.0885   | 10.5437    | 1         |
| cg23939610                                                                              | FCGBP                        | 0.00194359        | 0.00194359           | 0.314681           | -3.17782                     | T down vs N                            | 13.688  | 12.5206   | 14.6356    | 1         |
| cg23941354                                                                              | OR8A1                        | 4.85E-07          | 4.85E-07             | 0.323381           | -3.09233                     | T down vs N                            | 65.328  | 11.9369   | 2.92355    | 1         |
| cg23945481                                                                              | STK19;STK19;DOM3Z;STK19      | 1.68E-05          | 1.68E-05             | 0.193636           | -5.16434                     | T down vs N                            | 36.604  | 25.2458   | 11.0351    | 1         |
| cg23949611                                                                              | APOB                         | 9.06E-07          | 9.06E-07             | 0.216045           | -4.62868                     | T down vs N                            | 59.304  | 21.9904   | 5.93295    | 1         |
| cg23949936                                                                              | ADH1A                        | 1.89E-05          | 1.89E-05             | 0.164948           | -6.0625                      | T down vs N                            | 35.879  | 30.418    | 13.5647    | 1         |
| cg23950233                                                                              | B3GALT4                      | 0.00241584        | 0.00241584           | 3.88783            | 3.88783                      | T up vs N                              | 12.937  | 17.269    | 21.3585    | 1         |
| TCF7L2;TCF7L2;TCF7L2;TCF7L2;TCF7L2                                                      |                              |                   |                      |                    |                              |                                        |         |           |            |           |
| cg23951816                                                                              | ;TCF7L2                      | 0.00018255        | 0.000182549          | 0.204448           | -4.89121                     | T down vs N                            | 23.384  | 23.6024   | 16.1493    | 1         |
| cg23953052                                                                              | EPS8L1                       | 1.22E-05          | 1.22E-05             | 0.246535           | -4.05623                     | T down vs N                            | 38.738  | 18.3643   | 7.58504    | 1         |
| cg23956648                                                                              | IGF2BP2;IGF2BP2              | 0.00251168        | 0.00251168           | 0.2833             | -3.52983                     | T down vs N                            | 12.804  | 14.8992   | 18.6177    | 1         |
| cg23957285                                                                              | SEMA6B                       | 3.47E-05          | 3.47E-05             | 3.67964            | 3.67964                      | T up vs N                              | 32.176  | 15.8974   | 7.90521    | 1         |
| cg23958533                                                                              | PIK3C2B                      | 0.00093573        | 0.000935727          | 4.05269            | 4.05269                      | T up vs N                              | 16.375  | 18.3414   | 17.9213    | 1         |
| cg23958868                                                                              | SLC26A1                      | 0.00378879        | 0.00378879           | 3.02245            | 3.02245                      | T up vs N                              | 11.449  | 11.4585   | 16.0133    | 1         |
| cg23964820                                                                              | NRG1                         | 0.00079799        | 0.000797987          | 0.307625           | -3.25071                     | T down vs N                            | 16.995  | 13.0166   | 12.2544    | 1         |
| cg23965689                                                                              | RUNDC3A;RUNDC3A;RUNDC3A      | 0.00017096        | 0.00017096           | 4.81082            | 4.81082                      | T up vs N                              | 23.697  | 23.1122   | 15.605     | 1         |
| cg23967193                                                                              | PSG1;PSG1                    | 5.18E-06          | 5.18E-06             | 0.324855           | -3.0783                      | T down vs N                            | 44.776  | 11.8409   | 4.2312     | 1         |
| cg23967554                                                                              | PSD                          | 0.00021582        | 0.000215821          | 5.97455            | 5.97455                      | T up vs N                              | 22.597  | 29.9267   | 21.1899    | 1         |
| cg23968383                                                                              | ZNF572                       | 1.99E-05          | 1.99E-05             | 0.257214           | -3.88782                     | T down vs N                            | 35.541  | 17.2689   | 7.77417    | 1         |
| cg23971170                                                                              | LMX1A                        | 0.00301793        | 0.00301793           | 5.84383            | 5.84383                      | T up vs N                              | 12.19   | 29.1905   | 38.3146    | 1         |
| cg23972738                                                                              | MEIS1                        | 0.00233758        | 0.00233758           | 0.327879           | -3.04991                     | T down vs N                            | 13.049  | 11.6466   | 14.2806    | 1         |
| cg23972785                                                                              | GATA4                        | 0.00023989        | 0.000239894          | 0.29181            | -3.42689                     | T down vs N                            | 22.108  | 14.2082   | 10.2826    | 1         |
| cg23973115                                                                              | CDK1;CDK1;CDK1;CDC2;CDK1     | 8.33E-05          | 8.33E-05             | 0.139513           | -7.1678                      | T down vs N                            | 27.305  | 36.3343   | 21.2913    | 1         |
| cg23973123                                                                              | FGF5;FGF5                    | 1.18E-05          | 1.18E-05             | 0.323167           | -3.09437                     | T down vs N                            | 38.973  | 11.9509   | 4.90637    | 1         |
| cg23973393                                                                              | MYH14;MYH14;MYH14            | 3.48E-06          | 3.48E-06             | 3.28567            | 3.28567                      | T up vs N                              | 47.82   | 13.2538   | 4.43454    | 1         |
| cg23973429                                                                              | GRHL2;GRHL2                  | 0.00013267        | 0.000132667          | 5.04932            | 5.04932                      | T up vs N                              | 24.932  | 24.5579   | 15.7597    | 1         |
| cg23974688                                                                              | MBTD1                        | 0.00064961        | 0.000649606          | 0.286402           | -3.4916                      | T down vs N                            | 17.815  | 14.6431   | 13.151     | 1         |
| cg23975646                                                                              | MBP;MBP;MBP;MBP;MBP;MBP      | 0.00039541        | 0.000395405          | 3.63916            | 3.63916                      | T up vs N                              | 19.886  | 15.6286   | 12.5744    | 1         |
| cg23975887                                                                              | LOC650226                    | 0.00010448        | 0.000104479          | 0.228516           | -4.37606                     | T down vs N                            | 26.133  | 20.409    | 12.4956    | 1         |
| cg23975973                                                                              | DYNC1I1;DYNC1I1;DYNC1I1      | 3.39E-06          | 3.39E-06             | 0.232315           | -4.30449                     | T down vs N                            | 48.026  | 19.9556   | 6.64823    | 1         |
| cg23978968                                                                              | S1PR1                        | 0.00012636        | 0.000126362          | 3.27944            | 3.27944                      | T up vs N                              | 25.174  | 13.2116   | 8.39693    | 1         |
| cg23981871                                                                              | HOXD3                        | 0.00028261        | 0.000282611          | 3.2202             | 3.2202                       | T up vs N                              | 21.364  | 12.8092   | 9.59313    | 1         |
| cg23982317                                                                              | FAM129C;FAM129C              | 1.82E-05          | 1.82E-05             | 0.205738           | -4.86055                     | T down vs N                            | 36.108  | 23.4158   | 10.376     | 1         |
| cg23983671                                                                              | SALL3                        | 0.00309791        | 0.00309791           | 0.186466           | -5.36291                     | T down vs N                            | 12.104  | 26.4195   | 34.9249    | 1         |
| cg23984446                                                                              | OR5AK2                       | 0.00055236        | 0.000552356          | 0.183855           | -5.43907                     | T down vs N                            | 18.477  | 26.865    | 23.2631    | 1         |
| PCDHA6;PCDHA2;PCDHA1;PCDHA9;PCDHA7;PCDHA1;PCDHA6;PCDHA5;PCDHA10;PCDHA3;PCDHA4;PCDHA10;P |                              |                   |                      |                    |                              |                                        |         |           |            |           |
| cg23985374                                                                              | HA10;PCDHA3;PCDHA4;PCDHA10;P | 6.92E-05          | 6.92E-05             | 3.48785            | 3.48785                      | T up vs N                              | 28.29   | 14.6179   | 8.26753    | 1         |
| cg23985820                                                                              | GNAT2                        | 0.00124147        | 0.00124147           | 0.265788           | -3.7624                      | T down vs N                            | 15.305  | 16.4449   | 17.1913    | 1         |
| cg23986335                                                                              | KCNS3                        | 0.00384151        | 0.00384151           | 4.60712            | 4.60712                      | T up vs N                              | 11.405  | 21.8566   | 30.6634    | 1         |
| cg23987322                                                                              | BHMT                         | 0.00030801        | 0.00030801           | 3.47867            | 3.47867                      | T up vs N                              | 20.979  | 14.5563   | 11.1015    | 1         |
| cg23989004                                                                              | ZNF709                       | 0.00392994        | 0.00392994           | 3.08791            | 3.08791                      | T up vs N                              | 11.332  | 11.9067   | 16.8115    | 1         |
| cg23991388                                                                              | ADAMTS17                     | 0.00712912        | 0.00712912           | 0.264004           | -3.78782                     | T down vs N                            | 9.5049  | 16.6125   | 27.9644    | 1         |
| cg23991636                                                                              | IGF2BP3                      | 2.19E-07          | 2.19E-07             | 0.078525           | -12.7348                     | T down vs N                            | 73.745  | 60.6332   | 13.1552    | 1         |
| cg23992209                                                                              | CD5L                         | 9.35E-05          | 9.35E-05             | 0.183871           | -5.4386                      | T down vs N                            | 26.705  | 26.8623   | 16.0945    | 1         |
| cg23995459                                                                              | ZYG11B                       | 0.00070222        | 0.000702223          | 0.308277           | -3.24383                     | T down vs N                            | 17.502  | 12.9698   | 11.8566    | 1         |
| cg23995605                                                                              | SLC22A2                      | 0.00063553        | 0.000635532          | 0.312415           | -3.20087                     | T down vs N                            | 17.904  | 12.6776   | 11.3294    | 1         |
| cg23996800                                                                              | TSKU                         | 0.00025955        | 0.000259554          | 0.301169           | -3.3204                      | T down vs N                            | 21.749  | 13.4892   | 9.92375    | 1         |
| cg24000285                                                                              | LRRC8E;LRRC8E                | 0.0003329         | 0.000332901          | 9.26097            | 9.26097                      | T up vs N                              | 20.635  | 46.4021   | 35.9787    | 1         |
| cg24000437                                                                              | LCE3E                        | 1.42E-05          | 1.42E-05             | 0.153872           | -6.49892                     | T down vs N                            | 37.717  | 32.8099   | 13.9182    | 1         |
| cg24000528                                                                              | MIR10B                       | 0.00412251        | 0.00412251           | 3.96182            | 3.96182                      | T up vs N                              | 11.18   | 17.7518   | 25.4058    | 1         |

| Probeset ID | UCSC_REFGENE_NAME                 | p-value<br>(Type) | p-value (T vs.<br>N) | Ratio (T<br>vs. N) | Fold-<br>Change (T<br>vs. N) | Fold-Change (T vs.<br>N) (Description) | F(Type) | SS (Type) | SS (Error) | F (Error) |
|-------------|-----------------------------------|-------------------|----------------------|--------------------|------------------------------|----------------------------------------|---------|-----------|------------|-----------|
| cg24000797  | NUP210L;NUP210L                   | 0.00140602        | 0.00140602           | 0.146387           | -6.83122                     | T down vs N                            | 14.847  | 34.5815   | 37.268     | 1         |
| cg24001314  | SKI                               | 0.00680265        | 0.00680265           | 4.4543             | 4.4543                       | T up vs N                              | 9.6434  | 20.902    | 34.6797    | 1         |
| cg24004665  | SGMS1                             | 0.00096434        | 0.000964336          | 4.759              | 4.759                        | T up vs N                              | 16.259  | 22.7946   | 22.4311    | 1         |
| cg24006126  | RUSC1;RUSC1;C1orf104              | 9.42E-06          | 9.42E-06             | 8.66307            | 8.66307                      | T up vs N                              | 40.48   | 43.6611   | 17.2576    | 1         |
| cg24006991  | KIR2DL3;KIR2DL3                   | 1.31E-05          | 1.31E-05             | 0.218934           | -4.56759                     | T down vs N                            | 38.224  | 21.6107   | 9.04602    | 1         |
| cg24007193  | DENND1C                           | 4.07E-05          | 4.07E-05             | 0.31694            | -3.15517                     | T down vs N                            | 31.24   | 12.3661   | 6.33349    | 1         |
| cg24009650  | H1FNT                             | 2.07E-05          | 2.07E-05             | 0.166177           | -6.01768                     | T down vs N                            | 35.308  | 30.168    | 13.6709    | 1         |
| cg24009722  | INHBB                             | 0.00015381        | 0.000153811          | 0.237539           | -4.20984                     | T down vs N                            | 24.207  | 19.3523   | 12.791     | 1         |
| cg24010336  | FBXO17                            | 0.00332203        | 0.00332203           | 3.48818            | 3.48818                      | T up vs N                              | 11.874  | 14.6201   | 19.6997    | 1         |
| cg24019054  | PRR5;PRR5;PRR5;PRR5               | 3.60E-05          | 3.60E-05             | 0.253099           | -3.95103                     | T down vs N                            | 31.946  | 17.6815   | 8.85578    | 1         |
| cg24022651  | FNDC3B;FNDC3B                     | 0.00064405        | 0.00064405           | 0.287653           | -3.47641                     | T down vs N                            | 17.85   | 14.5411   | 13.034     | 1         |
| cg24023487  | SPTLC3                            | 0.00031011        | 0.00031011           | 0.290179           | -3.44615                     | T down vs N                            | 20.949  | 14.3378   | 10.9506    | 1         |
| cg24024661  | HMHA1                             | 8.41E-06          | 8.41E-06             | 0.092646           | -10.7938                     | T down vs N                            | 41.268  | 53.0079   | 20.5518    | 1         |
| cg24026212  | MS4A6A;MS4A6A;MS4A6A              | 2.84E-07          | 2.84E-07             | 0.209518           | -4.77285                     | T down vs N                            | 70.873  | 22.8796   | 5.16518    | 1         |
| cg24027068  | MUC6                              | 0.00080867        | 0.000808665          | 0.314943           | -3.17518                     | T down vs N                            | 16.943  | 12.5026   | 11.8068    | 1         |
| cg24027931  | C11orf20                          | 6.36E-06          | 6.36E-06             | 3.93412            | 3.93412                      | T up vs N                              | 43.269  | 17.5713   | 6.49758    | 1         |
| cg24028202  | ISLR2;ISLR2;ISLR2;ISLR2           | 0.00494488        | 0.00494488           | 0.168315           | -5.94123                     | T down vs N                            | 10.61   | 29.7397   | 44.8489    | 1         |
| cg24032445  | PSORS1C1;PSORS1C2                 | 4.96E-05          | 4.96E-05             | 0.320441           | -3.1207                      | T down vs N                            | 30.12   | 12.1308   | 6.4441     | 1         |
| cg24033224  | GPR133                            | 0.00637865        | 0.00637865           | 4.2245             | 4.2245                       | T up vs N                              | 9.8351  | 19.446    | 31.6354    | 1         |
| cg24033278  | CYP2B6                            | 7.79E-08          | 7.79E-08             | 0.27275            | -3.66636                     | T down vs N                            | 93.453  | 14.8794   | 2.38827    | 1         |
| cg24033557  | CDC42;CDC42;CDC42                 | 2.63E-06          | 2.63E-06             | 0.154144           | -6.48745                     | T down vs N                            | 50.058  | 32.748    | 10.4673    | 1         |
| cg24034923  | ANGEL2                            | 0.00014996        | 0.000149963          | 0.184333           | -5.42496                     | T down vs N                            | 24.331  | 26.7827   | 17.6126    | 1         |
| cg24039962  | C1orf9;C1orf9                     | 0.00080391        | 0.000803906          | 0.295934           | -3.37913                     | T down vs N                            | 16.966  | 13.8862   | 13.0956    | 1         |
| cg24040043  | YOD1                              | 7.14E-06          | 7.14E-06             | 0.216876           | -4.61094                     | T down vs N                            | 42.427  | 21.8803   | 8.2514     | 1         |
| cg24040595  | HOXA6                             | 0.0013968         | 0.0013968            | 9.32659            | 9.32659                      | T up vs N                              | 14.871  | 46.6969   | 50.2433    | 1         |
| cg24046616  | FABP1                             | 0.0005602         | 0.000560198          | 0.319298           | -3.13187                     | T down vs N                            | 18.419  | 12.2071   | 10.6038    | 1         |
| cg24047802  | CAPN2;CAPN2                       | 0.00014003        | 0.000140029          | 4.14974            | 4.14974                      | T up vs N                              | 24.666  | 18.967    | 12.3033    | 1         |
| cg24051242  | LRP5                              | 0.00165396        | 0.00165396           | 0.318065           | -3.14401                     | T down vs N                            | 14.636  | 11.567    | 11.8546    | 1         |
| cg24051554  | LOC100132111;C2CD4D               | 0.00020297        | 0.000202971          | 7.71062            | 7.71062                      | T up vs N                              | 22.884  | 39.0776   | 27.3226    | 1         |
| cg24053163  | TRIP11                            | 0.00021202        | 0.000212015          | 0.331328           | -3.01815                     | T down vs N                            | 22.68   | 11.429    | 8.06284    | 1         |
| cg24054190  | FGF12                             | 0.00012545        | 0.000125449          | 7.71847            | 7.71847                      | T up vs N                              | 25.21   | 39.1165   | 24.8258    | 1         |
| cg24054315  | LOC285696                         | 2.80E-05          | 2.80E-05             | 0.330384           | -3.02678                     | T down vs N                            | 33.435  | 11.8881   | 5.49752    | 1         |
| cg24058145  | UBD                               | 0.00456155        | 0.00456155           | 0.306062           | -3.26731                     | T down vs N                            | 10.861  | 13.1293   | 19.3417    | 1         |
| cg24059075  | PRPH                              | 6.83E-05          | 6.83E-05             | 0.330184           | -3.02862                     | T down vs N                            | 28.36   | 11.5007   | 6.48854    | 1         |
| cg24059154  | TRIM6-                            |                   |                      |                    |                              |                                        |         |           |            |           |
| cg24059154  | TRIM34;TRIM34;TRIM34;TRIM34       | 1.73E-06          | 1.73E-06             | 0.203474           | -4.91462                     | T down vs N                            | 53.559  | 23.7446   | 7.09338    | 1         |
| cg24059623  | MSH3;DHFR                         | 3.67E-06          | 3.67E-06             | 0.191574           | -5.21992                     | T down vs N                            | 47.398  | 25.5761   | 8.6337     | 1         |
| cg24061122  | FAM53C;FAM53C                     | 8.74E-06          | 8.74E-06             | 0.288899           | -3.46141                     | T down vs N                            | 40.998  | 14.4404   | 5.63558    | 1         |
| cg24062526  | POLR1A                            | 0.00453887        | 0.00453887           | 3.72666            | 3.72666                      | T up vs N                              | 10.877  | 16.2088   | 23.8443    | 1         |
| cg24064594  | GYPC;GYPC                         | 0.00047842        | 0.000478415          | 0.222445           | -4.49549                     | T down vs N                            | 19.076  | 21.1603   | 17.7486    | 1         |
| cg24065770  | SLC5A5                            | 0.00066987        | 0.000669865          | 0.271878           | -3.67812                     | T down vs N                            | 17.692  | 15.8873   | 14.3684    | 1         |
| cg24069602  | SCN4A                             | 5.83E-05          | 5.83E-05             | 0.282272           | -3.54268                     | T down vs N                            | 29.218  | 14.9852   | 8.20608    | 1         |
| cg24070123  | C6orf106;C6orf106                 | 0.00251407        | 0.00251407           | 0.190194           | -5.2578                      | T down vs N                            | 12.801  | 25.8004   | 32.2477    | 1         |
| cg24070446  | CLK2                              | 7.20E-06          | 7.20E-06             | 0.326461           | -3.06315                     | T down vs N                            | 42.375  | 11.7372   | 4.43179    | 1         |
| cg24072224  | PSG6;PSG6                         | 7.84E-05          | 7.84E-05             | 0.266806           | -3.74804                     | T down vs N                            | 27.627  | 16.3501   | 9.46903    | 1         |
| cg24073146  | KCNQ1;KCNQ1                       | 3.08E-05          | 3.08E-05             | 0.214479           | -4.66245                     | T down vs N                            | 32.879  | 22.1996   | 10.8032    | 1         |
| cg24073352  | CCDC151                           | 5.47E-05          | 5.47E-05             | 0.314128           | -3.18341                     | T down vs N                            | 29.573  | 12.5587   | 6.79465    | 1         |
| cg24073782  | MPP7                              | 2.83E-05          | 2.83E-05             | 0.32786            | -3.05008                     | T down vs N                            | 33.383  | 11.6478   | 5.58259    | 1         |
| cg24078828  | WWTR1;WWTR1;WWTR1;WWTR1;W<br>WTR1 | 5.29E-06          | 5.29E-06             | 17.8985            | 17.8985                      | T up vs N                              | 44.615  | 77.9413   | 27.9516    | 1         |
| cg24079051  | LOC643387;LOC151174;LOC151174     | 0.00035057        | 0.000350566          | 4.16405            | 4.16405                      | T up vs N                              | 20.409  | 19.0589   | 14.9419    | 1         |
| cg24079672  | ITGB4;ITGB4;ITGB4                 | 0.00028455        | 0.000284553          | 0.263652           | -3.79287                     | T down vs N                            | 21.333  | 16.6457   | 12.4844    | 1         |
| cg24081640  | RPE;RPE                           | 0.00090003        | 0.000900032          | 0.217792           | -4.59154                     | T down vs N                            | 16.525  | 21.7598   | 21.068     | 1         |
| cg24082215  | MKS1;MKS1                         | 0.00151187        | 0.00151187           | 0.249804           | -4.00314                     | T down vs N                            | 14.583  | 18.0204   | 19.772     | 1         |
| cg24082983  | KRTAP13-4                         | 3.92E-07          | 3.92E-07             | 0.174253           | -5.7388                      | T down vs N                            | 67.495  | 28.5938   | 6.77825    | 1         |
| cg24083695  | TLE2;TLE2;TLE2                    | 0.00018938        | 0.00018938           | 0.292481           | -3.41903                     | T down vs N                            | 23.21   | 14.1552   | 9.75801    | 1         |
| cg24085039  | PWWP2B;PWWP2B                     | 0.00103628        | 0.00103628           | 0.309604           | -3.22993                     | T down vs N                            | 15.984  | 12.8754   | 12.888     | 1         |
| cg24085438  | KCMF1                             | 2.86E-05          | 2.86E-05             | 0.327809           | -3.05056                     | T down vs N                            | 33.323  | 11.651    | 5.5943     | 1         |
| cg24085885  | CRTC1;CRTC1                       | 0.00015727        | 0.000157274          | 0.279977           | -3.57173                     | T down vs N                            | 24.099  | 15.1793   | 10.0779    | 1         |
| cg24086536  | NLRP13                            | 0.00355187        | 0.00355187           | 0.213293           | -4.68839                     | T down vs N                            | 11.657  | 22.3598   | 30.6904    | 1         |
| cg24086592  | RD3;RD3                           | 1.64E-05          | 1.64E-05             | 0.253094           | -3.9511                      | T down vs N                            | 36.787  | 17.682    | 7.69047    | 1         |
| cg24087312  | NHP2;NHP2                         | 3.46E-05          | 3.46E-05             | 0.196872           | -5.07944                     | T down vs N                            | 32.193  | 24.7387   | 12.2953    | 1         |
| cg24088496  | MAML2                             | 6.68E-06          | 6.68E-06             | 0.138865           | -7.20123                     | T down vs N                            | 42.912  | 36.5062   | 13.6116    | 1         |
| cg24091195  | LELP1                             | 7.85E-05          | 7.85E-05             | 0.205871           | -4.85742                     | T down vs N                            | 27.616  | 23.3967   | 13.5554    | 1         |
| cg24092960  | TSKS                              | 7.07E-05          | 7.07E-05             | 0.280736           | -3.56207                     | T down vs N                            | 28.172  | 15.1148   | 8.58424    | 1         |
| cg24094029  | KRT73                             | 0.00024205        | 0.000242045          | 0.304122           | -3.28815                     | T down vs N                            | 22.067  | 13.2707   | 9.62199    | 1         |
| cg24094450  | C15orf27                          | 0.00027142        | 0.000271419          | 0.25961            | -3.85194                     | T down vs N                            | 21.546  | 17.0338   | 12.6493    | 1         |
| cg24094538  | TFAP2D                            | 0.00047779        | 0.000477791          | 0.219562           | -4.55452                     | T down vs N                            | 19.081  | 21.5292   | 18.0528    | 1         |
| cg24095303  | BARX2                             | 0.00057331        | 0.000573313          | 0.222168           | -4.5011                      | T down vs N                            | 18.324  | 21.1955   | 18.5072    | 1         |
| cg24096680  | ACOX1;FBF1;ACOX1                  | 1.63E-05          | 1.63E-05             | 0.215278           | -4.64517                     | T down vs N                            | 36.815  | 22.0926   | 9.60153    | 1         |
| cg24098643  | TRIM5;TRIM5;TRIM5                 | 0.00729376        | 0.00729376           | 0.260306           | -3.84164                     | T down vs N                            | 9.4378  | 16.9663   | 28.7632    | 1         |

| Probeset ID                         | UCSC_REFGENE_NAME                   | p-value<br>(Type) | p-value (T vs.<br>N) | Ratio (T<br>vs. N) | Fold-<br>Change (T<br>vs. N) | Fold-Change (T vs.<br>N) (Description) | F(Type) | SS (Type) | SS (Error) | F (Error) |
|-------------------------------------|-------------------------------------|-------------------|----------------------|--------------------|------------------------------|----------------------------------------|---------|-----------|------------|-----------|
| cg24100168                          | TRIM78P                             | 1.37E-06          | 1.37E-06             | 0.172946           | -5.78217                     | T down vs N                            | 55.596  | 28.8407   | 8.30007    | 1         |
| cg24101578                          | CDH22;CDH22                         | 0.00132508        | 0.00132508           | 3.2631             | 3.2631                       | T up vs N                              | 15.064  | 13.1007   | 13.9146    | 1         |
| cg24102420                          | MIR128-2;ARPP-21                    | 0.00376459        | 0.00376459           | 3.36223            | 3.36223                      | T up vs N                              | 11.47   | 13.7721   | 19.2121    | 1         |
| cg24105782                          | GABRD                               | 1.27E-05          | 1.27E-05             | 0.282148           | -3.54424                     | T down vs N                            | 38.47   | 14.9957   | 6.2369     | 1         |
| cg24109739                          | LRP5                                | 0.00013572        | 0.00013572           | 0.297069           | -3.36622                     | T down vs N                            | 24.82   | 13.7991   | 8.89548    | 1         |
| cg24109894                          | PSMB2                               | 3.70E-06          | 3.70E-06             | 0.206778           | -4.8361                      | T down vs N                            | 47.327  | 23.2667   | 7.86578    | 1         |
| cg24110184                          | DOCK3                               | 6.30E-06          | 6.30E-06             | 0.223511           | -4.47406                     | T down vs N                            | 43.338  | 21.026    | 7.76254    | 1         |
| cg24112692                          | ST8SIA1                             | 0.00244308        | 0.00244308           | 0.326368           | -3.06402                     | T down vs N                            | 12.898  | 11.7432   | 14.5671    | 1         |
| cg24114587                          | RAET1E                              | 6.28E-05          | 6.28E-05             | 0.332057           | -3.01153                     | T down vs N                            | 28.812  | 11.3836   | 6.32151    | 1         |
| cg24115571                          | FZD6;FZD6;FZD6;FZD6                 | 0.00014488        | 0.00014488           | 0.313676           | -3.188                       | T down vs N                            | 24.499  | 12.59     | 8.22238    | 1         |
| cg24116687                          | PRDM1                               | 2.60E-05          | 2.60E-05             | 0.145644           | -6.86606                     | T down vs N                            | 33.902  | 34.7648   | 16.407     | 1         |
| cg24119869                          | KIR3DX1                             | 5.97E-05          | 5.97E-05             | 0.25428            | -3.93267                     | T down vs N                            | 29.092  | 17.5619   | 9.65851    | 1         |
| cg24120753                          | SV2C                                | 0.0005539         | 0.000553899          | 0.264104           | -3.78639                     | T down vs N                            | 18.466  | 16.603    | 14.386     | 1         |
| cg24127278                          | CENPA;CENPA                         | 1.24E-06          | 1.24E-06             | 0.274285           | -3.64584                     | T down vs N                            | 56.471  | 15.673    | 4.44062    | 1         |
| cg24127748                          | CECR1;CECR1;CECR1                   | 0.00032782        | 0.000327819          | 9.33504            | 9.33504                      | T up vs N                              | 20.703  | 46.7348   | 36.118     | 1         |
| cg24128590                          | C14orf43;C14orf43                   | 2.35E-05          | 2.35E-05             | 6.2925             | 6.2925                       | T up vs N                              | 34.512  | 31.688    | 14.6908    | 1         |
| C8orf40;C8orf40;C8orf40;C8orf40;SLC |                                     |                   |                      |                    |                              |                                        |         |           |            |           |
| cg24129600                          | 20A2                                | 0.00127033        | 0.00127033           | 0.306993           | -3.2574                      | T down vs N                            | 15.22   | 13.062    | 13.7314    | 1         |
| cg24131211                          | STK32C                              | 6.53E-05          | 6.53E-05             | 0.299339           | -3.3407                      | T down vs N                            | 28.6    | 13.6265   | 7.62334    | 1         |
| cg24131671                          | SLC36A2                             | 0.00050176        | 0.000501759          | 0.300747           | -3.32505                     | T down vs N                            | 18.876  | 13.5207   | 11.4606    | 1         |
| cg24133207                          | MIR149;PP14571;GPC1                 | 0.00219119        | 0.00219119           | 3.75591            | 3.75591                      | T up vs N                              | 13.271  | 16.4021   | 19.775     | 1         |
| cg24136754                          | C22orf33;C22orf33                   | 4.48E-06          | 4.48E-06             | 0.299375           | -3.34029                     | T down vs N                            | 45.868  | 13.6238   | 4.75236    | 1         |
| cg24136932                          | SLC39A14                            | 2.66E-06          | 2.66E-06             | 0.280484           | -3.56526                     | T down vs N                            | 49.942  | 15.1361   | 4.84917    | 1         |
| cg24137332                          | COP54                               | 4.27E-05          | 4.27E-05             | 0.19759            | -5.06099                     | T down vs N                            | 30.962  | 24.628    | 12.727     | 1         |
| cg24137472                          | OR11H4                              | 2.64E-06          | 2.64E-06             | 0.201691           | -4.95808                     | T down vs N                            | 50.02   | 24.0079   | 7.67951    | 1         |
| cg24137774                          | NAV2                                | 0.00182347        | 0.00182347           | 0.111829           | -8.94223                     | T down vs N                            | 13.912  | 44.9533   | 51.6992    | 1         |
| cg24140037                          | NMU                                 | 0.00042551        | 0.000425507          | 0.295821           | -3.38042                     | T down vs N                            | 19.572  | 13.8949   | 11.3591    | 1         |
| cg24140586                          | CYP2C9                              | 7.21E-09          | 7.21E-09             | 0.09966            | -10.0341                     | T down vs N                            | 120.93  | 49.8056   | 6.58986    | 1         |
| cg24141382                          | CTPS                                | 2.86E-06          | 2.86E-06             | 0.268096           | -3.73001                     | T down vs N                            | 49.378  | 16.231    | 5.2593     | 1         |
| cg24141516                          | MAPKAPK2;MAPKAPK2                   | 2.32E-06          | 2.32E-06             | 0.135656           | -7.37161                     | T down vs N                            | 51.078  | 37.3761   | 11.708     | 1         |
| cg24145486                          | ABCA7                               | 0.00059943        | 0.000599429          | 0.319604           | -3.12888                     | T down vs N                            | 18.142  | 12.1866   | 10.748     | 1         |
| cg24146288                          | PLA2G4E                             | 0.00039558        | 0.000395575          | 0.260251           | -3.84244                     | T down vs N                            | 19.884  | 16.9716   | 13.6562    | 1         |
| cg24146349                          | INTS1                               | 1.04E-05          | 1.04E-05             | 0.190054           | -5.26165                     | T down vs N                            | 39.823  | 25.8232   | 10.3752    | 1         |
| cg24147187                          | VSTM2L                              | 2.59E-05          | 2.59E-05             | 0.223445           | -4.47537                     | T down vs N                            | 33.912  | 21.0342   | 9.92431    | 1         |
| cg24147838                          | LAIR1;LAIR1;LAIR1;LAIR1             | 1.16E-05          | 1.16E-05             | 0.243085           | -4.11378                     | T down vs N                            | 39.045  | 18.7357   | 7.6776     | 1         |
| cg24153003                          | OAZ3;MRPL9                          | 3.83E-05          | 3.83E-05             | 0.309324           | -3.23285                     | T down vs N                            | 31.6    | 12.8952   | 6.52932    | 1         |
| cg24154024                          | OBSCN                               | 0.00016737        | 0.000167372          | 0.130096           | -7.68661                     | T down vs N                            | 23.799  | 38.9583   | 26.1915    | 1         |
| cg24154161                          | TAP1                                | 0.00130856        | 0.00130856           | 0.252141           | -3.96603                     | T down vs N                            | 15.11   | 17.7792   | 18.8259    | 1         |
| cg24154699                          | LILRB1;LILRB1;LILRB1;LILRB1         | 2.61E-06          | 2.61E-06             | 0.173733           | -5.75597                     | T down vs N                            | 50.111  | 28.6917   | 9.16103    | 1         |
| cg24154937                          | KCNA5                               | 1.24E-05          | 1.24E-05             | 6.57724            | 6.57724                      | T up vs N                              | 38.587  | 33.2312   | 13.7792    | 1         |
| cg24155429                          | DGKG;DGKG;DGKG                      | 6.43E-05          | 6.43E-05             | 3.69097            | 3.69097                      | T up vs N                              | 28.684  | 15.9726   | 8.90941    | 1         |
| cg24156054                          | MXRA5                               | 0.00148595        | 0.00148595           | 0.280449           | -3.56571                     | T down vs N                            | 14.645  | 15.1391   | 16.5396    | 1         |
| cg24156149                          | STK17B                              | 1.90E-05          | 1.90E-05             | 0.278423           | -3.59165                     | T down vs N                            | 35.847  | 15.3123   | 6.83444    | 1         |
| cg24157982                          | TMEM45A                             | 6.32E-05          | 6.32E-05             | 0.297468           | -3.3617                      | T down vs N                            | 28.778  | 13.7685   | 7.65505    | 1         |
| cg24159697                          | DSTYK;DSTYK                         | 0.00144259        | 0.00144259           | 0.231103           | -4.32707                     | T down vs N                            | 14.753  | 20.0989   | 21.7979    | 1         |
| cg24161057                          | TSTD1;TSTD1;TSTD1                   | 6.75E-05          | 6.75E-05             | 9.4572             | 9.4572                       | T up vs N                              | 28.427  | 47.2804   | 26.6112    | 1         |
| cg24161106                          | MIR33B;SREBF1;SREBF1                | 0.00092206        | 0.000922064          | 3.47893            | 3.47893                      | T up vs N                              | 16.432  | 14.5581   | 14.1755    | 1         |
|                                     |                                     |                   |                      |                    |                              |                                        |         |           |            |           |
| cg24161793                          | ITPRIPL1;ITPRIPL1;ITPRIPL1;ITPRIPL1 | 0.00045648        | 0.000456476          | 0.264685           | -3.77808                     | T down vs N                            | 19.274  | 16.5483   | 13.7376    | 1         |
| cg24166463                          | ORS1T1                              | 1.00E-05          | 1.00E-05             | 0.17743            | -5.63601                     | T down vs N                            | 40.038  | 28.0053   | 11.1916    | 1         |
| cg24168221                          | CST9                                | 0.00010077        | 0.00010077           | 0.242197           | -4.12886                     | T down vs N                            | 26.318  | 18.8328   | 11.4496    | 1         |
| cg24168549                          | THADA;THADA                         | 1.05E-05          | 1.05E-05             | 0.22258            | -4.49277                     | T down vs N                            | 39.727  | 21.1433   | 8.51553    | 1         |
| PCDHGA4;PCDHGB5;PCDHGA6;PCDHG       |                                     |                   |                      |                    |                              |                                        |         |           |            |           |
| A1;PCDHGA8;PCDHGA5;PCDHGB1;PC       |                                     |                   |                      |                    |                              |                                        |         |           |            |           |
| cg24172509                          | DHGB5;PCDHGB4;PCDHGA3;PCDHGA2       | 0.00063811        | 0.000638114          | 6.57486            | 6.57486                      | T up vs N                              | 17.888  | 33.2184   | 29.7132    | 1         |
| cg24173629                          | KIAA1671                            | 0.00013329        | 0.000133293          | 3.28845            | 3.28845                      | T up vs N                              | 24.909  | 13.2727   | 8.52554    | 1         |
| cg24174145                          | KRT80;KRT80                         | 0.00023017        | 0.000230167          | 0.170108           | -5.87861                     | T down vs N                            | 22.299  | 29.387    | 21.0861    | 1         |
| cg24174730                          | PDE4C;PDE4C;PDE4C                   | 0.00099527        | 0.000995267          | 0.312562           | -3.19937                     | T down vs N                            | 16.138  | 12.6674   | 12.5588    | 1         |
| cg24176383                          | OR2Z1                               | 4.74E-06          | 4.74E-06             | 0.147156           | -6.79553                     | T down vs N                            | 45.437  | 34.3932   | 12.111     | 1         |
| cg24179288                          | HCG2P7                              | 0.00270796        | 0.00270796           | 0.32801            | -3.04869                     | T down vs N                            | 12.551  | 11.6382   | 14.8367    | 1         |
| cg24179734                          | BRD9;BRD9;BRD9                      | 0.00026171        | 0.000261705          | 0.233061           | -4.29073                     | T down vs N                            | 21.711  | 19.8681   | 14.6419    | 1         |
| cg24180975                          | C6orf142;C6orf142                   | 0.00051186        | 0.00051186           | 0.297632           | -3.35985                     | T down vs N                            | 18.793  | 13.756    | 11.7117    | 1         |
| cg24181662                          | ZACN                                | 0.00096197        | 0.000961973          | 0.306072           | -3.26721                     | T down vs N                            | 16.269  | 13.1286   | 12.9117    | 1         |
| cg24182521                          | PLTP;PLTP                           | 0.00038366        | 0.000383657          | 0.264154           | -3.78567                     | T down vs N                            | 20.016  | 16.5983   | 13.2677    | 1         |
| cg24184689                          | SEMA7A;SEMA7A;SEMA7A                | 4.72E-05          | 4.72E-05             | 3.97019            | 3.97019                      | T up vs N                              | 30.399  | 17.8062   | 9.37218    | 1         |
| cg24185447                          | FBXL7                               | 0.00409612        | 0.00409612           | 0.313016           | -3.19473                     | T down vs N                            | 11.2    | 12.6357   | 18.051     | 1         |
| cg24185850                          | PACS2;PACS2                         | 3.83E-05          | 3.83E-05             | 3.89684            | 3.89684                      | T up vs N                              | 31.598  | 17.3279   | 8.77425    | 1         |
| cg24187101                          | RHPN1                               | 0.00097733        | 0.000977334          | 0.299307           | -3.34105                     | T down vs N                            | 16.208  | 13.6289   | 13.4541    | 1         |
| cg24187269                          | TKTL1;TKTL1;TKTL1                   | 2.81E-05          | 2.81E-05             | 0.224727           | -4.44983                     | T down vs N                            | 33.429  | 20.8739   | 9.99086    | 1         |
| cg24191821                          | P2RY6;P2RY6;P2RY6;P2RY6             | 0.0002456         | 0.000245597          | 0.156072           | -6.4073                      | T down vs N                            | 22.001  | 32.3139   | 23.5005    | 1         |
| cg24192671                          | ENPEP                               | 8.29E-05          | 8.29E-05             | 0.241579           | -4.13943                     | T down vs N                            | 27.329  | 18.9008   | 11.0658    | 1         |

| Probeset ID | UCSC_REFGENE_NAME                  | p-value<br>(Type) | p-value (T vs.<br>N) | Ratio (T<br>vs. N) | Fold-<br>Change (T<br>vs. N) | Fold-Change (T vs.<br>N) (Description) | F(Type) | SS (Type) | SS (Error) | F (Error) |
|-------------|------------------------------------|-------------------|----------------------|--------------------|------------------------------|----------------------------------------|---------|-----------|------------|-----------|
| cg24194674  | ADAM12;ADAM12                      | 0.00033291        | 0.000332913          | 0.317159           | -3.15299                     | T down vs N                            | 20.635  | 12.3513   | 9.57685    | 1         |
| cg24196693  | PCDH21                             | 0.00207736        | 0.00207736           | 4.1262             | 4.1262                       | T up vs N                              | 13.456  | 18.8157   | 22.3737    | 1         |
| cg24202131  | BRUNOL4;BRUNOL4;BRUNOL4;BRUNOL4    | 0.00034412        | 0.000344115          | 3.29569            | 3.29569                      | T up vs N                              | 20.49   | 13.3218   | 10.4027    | 1         |
| cg24205914  | RHOBTB1;RHOBTB1                    | 0.00722315        | 0.00722315           | 3.7287             | 3.7287                       | T up vs N                              | 9.4664  | 16.2223   | 27.4189    | 1         |
| cg24207529  | SPEG                               | 0.00280503        | 0.00280503           | 3.55863            | 3.55863                      | T up vs N                              | 12.433  | 15.0918   | 19.4219    | 1         |
| cg24208375  | CLIC1;CLIC1                        | 0.00011586        | 0.000115864          | 4.26292            | 4.26292                      | T up vs N                              | 25.608  | 19.6911   | 12.3029    | 1         |
| cg24214699  | LRRC27;LRRC27;LRRC27;LRRC27;LRRC27 | 6.68E-05          | 6.68E-05             | 0.189295           | -5.28277                     | T down vs N                            | 28.483  | 25.948    | 14.576     | 1         |
| cg24216893  | TPO;TPO;TPO;TPO                    | 1.43E-06          | 1.43E-06             | 0.098414           | -10.1611                     | T down vs N                            | 55.185  | 50.3502   | 14.5982    | 1         |
| cg24217159  | GPR77                              | 0.00026203        | 0.000262026          | 0.16003            | -6.24885                     | T down vs N                            | 21.706  | 31.4486   | 23.182     | 1         |
| cg24217704  | GALNT3                             | 0.00023768        | 0.000237684          | 13.9463            | 13.9463                      | T up vs N                              | 22.151  | 65.042    | 46.9813    | 1         |
| cg24217789  | LOC285830;LOC285830                | 0.00363173        | 0.00363173           | 0.313888           | -3.18585                     | T down vs N                            | 11.585  | 12.5753   | 17.3675    | 1         |
| cg24220046  | SHANK1                             | 1.00E-05          | 1.00E-05             | 5.18833            | 5.18833                      | T up vs N                              | 40.071  | 25.3886   | 10.1376    | 1         |
| cg24229750  | UBQLN3                             | 7.56E-05          | 7.56E-05             | 0.204616           | -4.8872                      | T down vs N                            | 27.815  | 23.578    | 13.5627    | 1         |
| cg24232092  | KIAA1530                           | 0.00102609        | 0.00102609           | 0.287502           | -3.47824                     | T down vs N                            | 16.022  | 14.5534   | 14.5335    | 1         |
| cg24232444  | DOCK9;DOCK9;DOCK9;DOCK9            | 9.25E-05          | 9.25E-05             | 0.126087           | -7.93102                     | T down vs N                            | 26.76   | 40.1634   | 24.0136    | 1         |
| cg24235037  | PLA2R1;PLA2R1                      | 0.00035422        | 0.000354223          | 4.8047             | 4.8047                       | T up vs N                              | 20.363  | 23.0747   | 18.1306    | 1         |
| cg24235882  | CHIC2                              | 9.80E-05          | 9.80E-05             | 0.253534           | -3.94424                     | T down vs N                            | 26.46   | 17.6373   | 10.665     | 1         |
| cg24238265  | B4GALNT2                           | 4.19E-06          | 4.19E-06             | 0.171505           | -5.83075                     | T down vs N                            | 46.372  | 29.1164   | 10.0463    | 1         |
| cg24238929  | LOC90586                           | 0.0034226         | 0.0034226            | 0.208727           | -4.79094                     | T down vs N                            | 11.777  | 22.9905   | 31.2338    | 1         |
| cg24240626  | REG3A;REG3A;REG3A;REG3A            | 2.44E-05          | 2.44E-05             | 0.265962           | -3.75993                     | T down vs N                            | 34.269  | 16.4286   | 7.67044    | 1         |
| cg24241823  | HOXB3                              | 2.55E-05          | 2.55E-05             | 6.24912            | 6.24912                      | T up vs N                              | 34.019  | 31.4501   | 14.7917    | 1         |
| cg24252148  | LRP5                               | 3.75E-05          | 3.75E-05             | 0.28307            | -3.53269                     | T down vs N                            | 33.212  | 14.0408   | 6.34149    | 1         |
| cg24252656  | KCNIP4;KCNIP4;KCNIP4;KCNIP4;KCNIP4 | 0.00057456        | 0.000574559          | 0.261021           | -3.83111                     | T down vs N                            | 18.315  | 16.8972   | 14.7612    | 1         |
| cg24255159  | S100A7A                            | 1.56E-05          | 1.56E-05             | 0.164496           | -6.07916                     | T down vs N                            | 37.089  | 30.5107   | 13.162     | 1         |
| cg24260359  | DNASE1L3                           | 8.12E-06          | 8.12E-06             | 0.241983           | -4.13252                     | T down vs N                            | 41.518  | 18.8563   | 7.26679    | 1         |
| cg24262376  | SCNM1;LYSMD1;LYSMD1                | 0.00143514        | 0.00143514           | 0.316382           | -3.16073                     | T down vs N                            | 14.772  | 12.4041   | 13.4354    | 1         |
| cg24263062  | EBF4                               | 0.00035025        | 0.000350254          | 5.04293            | 5.04293                      | T up vs N                              | 20.412  | 24.5195   | 19.2193    | 1         |
| cg24264679  | DLG3;DLG3;DLG3;DLG3                | 0.00465383        | 0.00465383           | 4.04765            | 4.04765                      | T up vs N                              | 10.798  | 18.3089   | 27.1286    | 1         |
| cg24267283  | SOX2OT                             | 4.77E-05          | 4.77E-05             | 7.18579            | 7.18579                      | T up vs N                              | 30.343  | 36.4268   | 19.2083    | 1         |
| cg24268035  | LHPP;LHPP                          | 0.00149715        | 0.00149715           | 3.03456            | 3.03456                      | T up vs N                              | 14.618  | 11.5414   | 12.6326    | 1         |
| cg24268966  | HMG A2                             | 5.41E-05          | 5.41E-05             | 0.292232           | -3.42194                     | T down vs N                            | 29.637  | 14.1749   | 7.65253    | 1         |
| cg24272697  | HOXA3;HOXA3                        | 6.33E-05          | 6.33E-05             | 4.3192             | 4.3192                       | T up vs N                              | 28.775  | 20.049    | 11.1482    | 1         |
| cg24274347  | EP400                              | 0.00017329        | 0.000173294          | 3.22694            | 3.22694                      | T up vs N                              | 23.632  | 12.855    | 8.70331    | 1         |
| cg24276787  | RNF39;RNF39                        | 0.00022557        | 0.000225573          | 0.182172           | -5.48933                     | T down vs N                            | 22.392  | 27.1576   | 19.4053    | 1         |
| cg24280832  | C10orf11                           | 6.25E-06          | 6.25E-06             | 15.8746            | 15.8746                      | T up vs N                              | 43.391  | 71.5918   | 26.3988    | 1         |
| cg24281267  | TULP1                              | 0.00326489        | 0.00326489           | 6.46903            | 6.46903                      | T up vs N                              | 11.931  | 32.6484   | 43.7826    | 1         |
| cg24284822  | CXCL13                             | 0.00029304        | 0.000293039          | 0.250169           | -3.99731                     | T down vs N                            | 21.201  | 17.9825   | 13.5708    | 1         |
| cg24284859  | SHANK2                             | 0.00041759        | 0.000417585          | 0.308004           | -3.24671                     | T down vs N                            | 19.652  | 12.9894   | 10.5755    | 1         |
| cg24285942  | SLC22A12;SLC22A12                  | 0.00244013        | 0.00244013           | 0.189393           | -5.28002                     | T down vs N                            | 12.902  | 25.9317   | 32.1573    | 1         |
| cg24286812  | CYP2W1                             | 5.78E-05          | 5.78E-05             | 0.169463           | -5.90098                     | T down vs N                            | 29.265  | 29.5132   | 16.1355    | 1         |
| cg24287175  | RAI1                               | 0.00020642        | 0.000206416          | 3.02817            | 3.02817                      | T up vs N                              | 22.805  | 11.4977   | 8.06684    | 1         |
| cg24295561  | MAD1L1;MAD1L1;MAD1L1               | 0.00147428        | 0.00147428           | 0.310404           | -3.22161                     | T down vs N                            | 14.674  | 12.8188   | 13.9772    | 1         |
| cg24298423  | C7orf58;C7orf58                    | 0.00081061        | 0.000810605          | 0.289259           | -3.45711                     | T down vs N                            | 16.934  | 14.4115   | 13.6171    | 1         |
| cg24298684  | MC3R;MC3R                          | 1.65E-07          | 1.65E-07             | 0.241399           | -4.14252                     | T down vs N                            | 76.947  | 18.9206   | 3.93427    | 1         |
| cg24301414  | C19orf41                           | 0.00146562        | 0.00146562           | 0.269362           | -3.71248                     | T down vs N                            | 14.695  | 16.115    | 17.5458    | 1         |
| cg24302752  | BCKDHB;BCKDHB                      | 0.00056323        | 0.000563233          | 0.318315           | -3.14155                     | T down vs N                            | 18.397  | 12.2732   | 10.6741    | 1         |
| cg24304210  | PAK1;PAK1                          | 0.0005728         | 0.000572802          | 0.312676           | -3.1982                      | T down vs N                            | 18.328  | 12.6594   | 11.0516    | 1         |
| cg24304425  | PRTN3;PRTN3                        | 3.46E-05          | 3.46E-05             | 0.324709           | -3.07968                     | T down vs N                            | 32.19   | 11.8504   | 5.89031    | 1         |
| cg24304714  | LCE1C                              | 2.76E-06          | 2.76E-06             | 0.263684           | -3.79242                     | T down vs N                            | 49.664  | 16.6427   | 5.36176    | 1         |
| cg24306340  | CACHD1                             | 1.92E-05          | 1.92E-05             | 0.323247           | -3.09361                     | T down vs N                            | 35.778  | 11.9457   | 5.34218    | 1         |
| cg24308336  | C20orf95                           | 3.68E-05          | 3.68E-05             | 0.257198           | -3.88806                     | T down vs N                            | 31.821  | 17.2705   | 8.68368    | 1         |
| cg24309555  | APOB                               | 3.02E-05          | 3.02E-05             | 4.32927            | 4.32927                      | T up vs N                              | 32.986  | 20.1128   | 9.75584    | 1         |
| cg24310246  | RAX2                               | 0.00024483        | 0.000244826          | 0.247468           | -4.04093                     | T down vs N                            | 22.015  | 18.2654   | 13.2749    | 1         |
| cg24311135  | SIRPB2;SIRPB2                      | 8.66E-05          | 8.66E-05             | 0.201949           | -4.95175                     | T down vs N                            | 27.1    | 23.9696   | 14.1517    | 1         |
| cg24311947  | XKR8                               | 0.00636635        | 0.00636635           | 8.21895            | 8.21895                      | T up vs N                              | 9.8408  | 41.5586   | 67.5693    | 1         |
| cg24313473  | PSG3                               | 0.00014482        | 0.000144821          | 0.291034           | -3.43602                     | T down vs N                            | 24.501  | 14.2696   | 9.31861    | 1         |
| cg24314434  | FUT3;FUT3;FUT3;FUT3                | 2.47E-07          | 2.47E-07             | 0.129778           | -7.70549                     | T down vs N                            | 72.394  | 39.0521   | 8.63103    | 1         |
| cg24315209  | CDK18;CDK18;CDK18                  | 6.69E-06          | 6.69E-06             | 0.316842           | -3.15615                     | T down vs N                            | 42.897  | 12.3728   | 4.61489    | 1         |
| cg24315710  | COL29A1;COL29A1                    | 9.91E-06          | 9.91E-06             | 0.205637           | -4.86293                     | T down vs N                            | 40.131  | 23.4303   | 9.3416     | 1         |
| cg24316982  | SPRR4                              | 0.00055656        | 0.000556561          | 0.258862           | -3.86306                     | T down vs N                            | 18.446  | 17.1068   | 14.8383    | 1         |
| cg24318032  | KRT32                              | 5.70E-06          | 5.70E-06             | 0.215139           | -4.64817                     | T down vs N                            | 44.06   | 22.1112   | 8.0294     | 1         |
| cg24319167  | KLRC2                              | 0.00127825        | 0.00127825           | 0.30296            | -3.30077                     | T down vs N                            | 15.197  | 13.3562   | 14.0619    | 1         |
| cg24321467  | LRRC8E;LRRC8E                      | 0.00052691        | 0.000526913          | 3.37153            | 3.37153                      | T up vs N                              | 18.672  | 13.8349   | 11.8548    | 1         |
| cg24323958  | SLC25A24                           | 9.97E-05          | 9.97E-05             | 0.228706           | -4.37242                     | T down vs N                            | 26.373  | 20.386    | 12.3678    | 1         |
| cg24325581  | DUSP22                             | 7.96E-05          | 7.96E-05             | 0.211984           | -4.71734                     | T down vs N                            | 27.548  | 22.5384   | 13.0905    | 1         |
| cg24325996  | CRABP1                             | 0.00100996        | 0.00100996           | 4.08227            | 4.08227                      | T up vs N                              | 16.082  | 18.5326   | 18.4377    | 1         |
| cg24328944  | DZIP1;DZIP1                        | 0.00360504        | 0.00360504           | 0.321557           | -3.10986                     | T down vs N                            | 11.609  | 12.0568   | 16.6172    | 1         |
| cg24330204  | PKD2L2                             | 0.00428386        | 0.00428386           | 4.87271            | 4.87271                      | T up vs N                              | 11.058  | 23.4898   | 33.9871    | 1         |
| cg24330456  | RNF39;RNF39                        | 0.00087548        | 0.000875478          | 5.22182            | 5.22182                      | T up vs N                              | 16.633  | 25.5874   | 24.6141    | 1         |

| Probeset ID | UCSC_REFGENE_NAME                  | p-value<br>(Type)                   | p-value (T vs.<br>N) | Ratio (T<br>vs. N) | Fold-<br>Change (T<br>vs. N) | Fold-Change (T vs.<br>N) (Description) | F(Type)     | SS (Type) | SS (Error) | F (Error) |   |
|-------------|------------------------------------|-------------------------------------|----------------------|--------------------|------------------------------|----------------------------------------|-------------|-----------|------------|-----------|---|
| cg24330746  | EVISL;EVISL                        | 0.00270811                          | 0.00270811           | 3.44073            | 3.44073                      | T up vs N                              | 12.551      | 14.3013   | 18.232     | 1         |   |
| cg24331853  | DENDND1C                           | 0.00015834                          | 0.00015834           | 0.235986           | -4.23753                     | T down vs N                            | 24.067      | 19.5292   | 12.9835    | 1         |   |
| cg24331934  | ALPPL2                             | 9.32E-06                            | 9.32E-06             | 0.140367           | -7.12418                     | T down vs N                            | 40.558      | 36.1095   | 14.2451    | 1         |   |
| cg24332002  | HSPG2                              | 1.48E-05                            | 1.48E-05             | 0.242908           | -4.11679                     | T down vs N                            | 37.429      | 18.7551   | 8.01743    | 1         |   |
| cg24332783  | PAX6;PAX6;PAX6                     | 0.00690269                          | 0.00690269           | 3.4265             | 3.4265                       | T up vs N                              | 9.6002      | 14.2056   | 23.6754    | 1         |   |
| cg24334048  | ABCB11                             | 6.19E-05                            | 6.19E-05             | 0.214877           | -4.65384                     | T down vs N                            | 28.898      | 22.1462   | 12.2617    | 1         |   |
| cg24335981  | GIMAP1                             | 0.00107859                          | 0.00107859           | 0.306771           | -3.25976                     | T down vs N                            | 15.833      | 13.0781   | 13.2164    | 1         |   |
| cg24336338  | GPR133                             | 0.0001192                           | 0.000119203          | 0.248161           | -4.02964                     | T down vs N                            | 25.466      | 18.1922   | 11.4301    | 1         |   |
| cg24336547  | SIRPD                              | 1.53E-07                            | 1.53E-07             | 0.165382           | -6.04662                     | T down vs N                            | 77.813      | 30.3295   | 6.23639    | 1         |   |
| cg24338003  | WDFC9                              | 2.48E-05                            | 2.48E-05             | 0.270958           | -3.69061                     | T down vs N                            | 34.173      | 15.9701   | 7.47742    | 1         |   |
| cg24338351  | BLCAP;BLCAP;BLCAP;BLCAP;NNAT;NN    |                                     |                      |                    |                              |                                        |             |           |            |           |   |
|             | AT;BLCAP                           | 7.94E-05                            | 7.94E-05             | 3.46734            | 3.46734                      | T up vs N                              | 27.557      | 14.4802   | 8.40751    | 1         |   |
|             | C8orf45;C8orf45;C8orf45            | 0.00066635                          | 0.000666352          | 0.327761           | -3.051                       | T down vs N                            | 17.713      | 11.6541   | 10.5272    | 1         |   |
|             | RXRA                               | 0.00455147                          | 0.00455147           | 3.52964            | 3.52964                      | T up vs N                              | 10.868      | 14.898    | 21.9334    | 1         |   |
| cg24343287  | ZNF135;ZNF135;ZNF135;ZNF135;ZNF1   |                                     |                      |                    |                              |                                        |             |           |            |           |   |
|             | 35                                 | 0.00187207                          | 0.00187207           | 3.34723            | 3.34723                      | T up vs N                              | 13.82       | 13.6707   | 15.8277    | 1         |   |
|             | CLDN17                             | 1.51E-05                            | 1.51E-05             | 0.23552            | -4.24592                     | T down vs N                            | 37.314      | 19.5827   | 8.39686    | 1         |   |
|             | FCRL1;FCRL1;FCRL1                  | 0.00015773                          | 0.000157729          | 0.235107           | -4.25339                     | T down vs N                            | 24.085      | 19.6304   | 13.0406    | 1         |   |
| cg24346815  | SBNO2;SBNO2                        | 0.00111926                          | 0.00111926           | 0.300506           | -3.32772                     | T down vs N                            | 15.693      | 13.5388   | 13.8038    | 1         |   |
|             | C11orf49;C11orf49;C11orf49;C11orf4 |                                     |                      |                    |                              |                                        |             |           |            |           |   |
|             | 9                                  | 4.95E-06                            | 4.95E-06             | 0.234166           | -4.27048                     | T down vs N                            | 55.249      | 15.7914   | 3.7157     | 1         |   |
|             | PDLIM3;PDLIM3                      | 8.89E-05                            | 8.89E-05             | 0.279652           | -3.57587                     | T down vs N                            | 26.963      | 15.207    | 9.02389    | 1         |   |
| cg24348479  | DCST1;DCST2;DCST1                  | 9.55E-05                            | 9.55E-05             | 0.303192           | -3.29824                     | T down vs N                            | 26.593      | 13.339    | 8.02561    | 1         |   |
| cg24349819  | ARHGAP27;ARHGAP27                  | 5.83E-06                            | 5.83E-06             | 0.159583           | -6.26633                     | T down vs N                            | 43.906      | 31.5445   | 11.4952    | 1         |   |
| cg24350011  | AJAP1;AJAP1                        | 0.00612095                          | 0.00612095           | 6.41976            | 6.41976                      | T up vs N                              | 9.9587      | 32.3816   | 52.0252    | 1         |   |
| cg24354612  | ICAM1                              | 0.00054011                          | 0.00054011           | 0.269177           | -3.71502                     | T down vs N                            | 18.57       | 16.1318   | 13.8993    | 1         |   |
| cg24354924  | DAXX;DAXX;DAXX;DAXX                | 0.00059942                          | 0.000599418          | 0.244409           | -4.0915                      | T down vs N                            | 18.142      | 18.5921   | 16.3972    | 1         |   |
| cg24355048  | CTSG                               | 1.05E-05                            | 1.05E-05             | 0.218508           | -4.5765                      | T down vs N                            | 39.72       | 21.6662   | 8.72762    | 1         |   |
| cg24360034  | OR8B12                             | 0.00198073                          | 0.00198073           | 0.274473           | -3.64335                     | T down vs N                            | 13.622      | 15.6565   | 18.3902    | 1         |   |
| cg24360617  | APOBEC3A                           | 1.40E-05                            | 1.40E-05             | 0.318049           | -3.14417                     | T down vs N                            | 37.799      | 12.2911   | 5.2027     | 1         |   |
| cg24360871  | HOXA3                              | 0.00203281                          | 0.00203281           | 8.01206            | 8.01206                      | T up vs N                              | 13.875      | 38.1729   | 41.2686    | 1         |   |
| cg24361098  | BCL11A;BCL11A;BCL11A               | 8.30E-06                            | 8.30E-06             | 0.333262           | -3.00065                     | T down vs N                            | 41.359      | 11.3089   | 4.3749     | 1         |   |
| cg24361265  | ELL3                               | 3.66E-05                            | 3.66E-05             | 6.58445            | 6.58445                      | T up vs N                              | 31.86       | 33.2699   | 16.708     | 1         |   |
| cg24361385  | HOXA3                              | 0.00139488                          | 0.00139488           | 3.97574            | 3.97574                      | T up vs N                              | 14.876      | 17.8424   | 19.1909    | 1         |   |
| cg24362726  | SCLT1;C4orf33                      | 0.00018178                          | 0.000181779          | 0.311713           | -3.20808                     | T down vs N                            | 23.404      | 12.7266   | 8.70038    | 1         |   |
| cg24363820  | CPT1B;CPT1B;CPT1B;CHKB-            |                                     |                      |                    |                              |                                        |             |           |            |           |   |
|             | CPT1B;CPT1B;CPT1B;CPT1B;CPT1B      | 0.00019803                          | 0.000198033          | 4.97497            | 4.97497                      | T up vs N                              | 22.999      | 24.11     | 16.7727    | 1         |   |
|             | SLITRK5                            | 5.90E-05                            | 5.90E-05             | 3.08262            | 3.08262                      | T up vs N                              | 29.16       | 11.8705   | 6.5134     | 1         |   |
|             | MRC2                               | 7.37E-05                            | 7.37E-05             | 0.285719           | -3.49994                     | T down vs N                            | 27.952      | 14.699    | 8.41378    | 1         |   |
| cg24368031  | MIB2;MIB2;MIB2;MIB2;MIB2           | 8.87E-05                            | 8.87E-05             | 5.26028            | 5.26028                      | T up vs N                              | 26.98       | 25.8151   | 15.3094    | 1         |   |
| cg24368912  | ADH1B                              | 1.44E-05                            | 1.44E-05             | 0.246227           | -4.06129                     | T down vs N                            | 37.622      | 18.3971   | 7.82398    | 1         |   |
| cg24369989  | CHRNB4                             | 5.23E-06                            | 5.23E-06             | 11.3578            | 11.3578                      | T up vs N                              | 44.703      | 55.302    | 19.7934    | 1         |   |
| cg24371534  | ARHGEF16                           | 0.0004025                           | 0.000402495          | 0.14109            | -7.08769                     | T down vs N                            | 19.81       | 35.9209   | 29.0126    | 1         |   |
| cg24376214  | RASGRP4;RASGRP4;RASGRP4;RASGRP     |                                     |                      |                    |                              |                                        |             |           |            |           |   |
|             | 4;RASGRP4;RASGRP4;RASGRP4          | 0.00028945                          | 0.00028945           | 0.304051           | -3.28892                     | T down vs N                            | 21.257      | 13.2759   | 9.99286    | 1         |   |
|             | OR5AR1;OR8U8                       | 8.25E-06                            | 8.25E-06             | 0.151476           | -6.60169                     | T down vs N                            | 41.404      | 33.3623   | 12.8924    | 1         |   |
|             | PRRX1;PRRX1                        | 0.00327359                          | 0.00327359           | 0.228473           | -4.37688                     | T down vs N                            | 11.922      | 20.4142   | 27.3961    | 1         |   |
|             | GGTLC1;GGTLC1                      | 0.00012568                          | 0.000125683          | 0.301413           | -3.31771                     | T down vs N                            | 25.201      | 13.4709   | 8.55266    | 1         |   |
|             | SKI                                | 1.74E-05                            | 1.74E-05             | 0.192845           | -5.18551                     | T down vs N                            | 36.404      | 25.3718   | 11.1511    | 1         |   |
|             | WWTR1;WWTR1;WWTR1                  | 0.00024375                          | 0.000243747          | 9.99458            | 9.99458                      | T up vs N                              | 22.035      | 49.6351   | 36.0406    | 1         |   |
|             | PODYN                              | 9.11E-05                            | 9.11E-05             | 0.145208           | -6.88669                     | T down vs N                            | 26.837      | 34.8732   | 20.7911    | 1         |   |
|             | OR6N1                              | 1.19E-05                            | 1.19E-05             | 0.181395           | -5.51283                     | T down vs N                            | 38.874      | 27.2941   | 11.2339    | 1         |   |
|             | EFCAB8                             | 0.00074434                          | 0.000744343          | 0.331074           | -3.02048                     | T down vs N                            | 17.27       | 11.4449   | 10.6032    | 1         |   |
|             | PTPRK;PTPRK                        | 1.99E-05                            | 1.99E-05             | 0.136921           | -7.30349                     | T down vs N                            | 35.561      | 37.0295   | 16.6606    | 1         |   |
|             | cg24390590                         | PCSK6;PCSK6;PCSK6;PCSK6;PCSK6;PCSK6 | 0.00051741           | 0.000517406        | 0.28517                      | -3.50668                               | T down vs N | 18.748    | 14.7441    | 12.583    | 1 |
| cg24393942  | C17orf90;CCDC137                   | 0.00249347                          | 0.00249347           | 0.245787           | -4.06856                     | T down vs N                            | 12.829      | 18.4441   | 23.0029    | 1         |   |
| cg24397545  | CCDC2                              | 1.73E-05                            | 1.73E-05             | 0.251115           | -3.98223                     | T down vs N                            | 36.442      | 17.8846   | 7.85227    | 1         |   |
| cg24402300  | EPS8L1;EPS8L1                      | 0.00668277                          | 0.00668277           | 0.30559            | -3.26808                     | T down vs N                            | 9.6962      | 13.1345   | 21.6737    | 1         |   |
| cg24403041  | POTED                              | 1.59E-05                            | 1.59E-05             | 0.300512           | -3.32765                     | T down vs N                            | 36.974      | 13.5383   | 5.85857    | 1         |   |
| cg24404533  | MUC6                               | 1.99E-05                            | 1.99E-05             | 0.199804           | -5.00489                     | T down vs N                            | 35.547      | 24.2906   | 10.9333    | 1         |   |
| cg24409539  | PAX8;PAX8;PAX8;PAX8;PAX8;LOC4408   |                                     |                      |                    |                              |                                        |             |           |            |           |   |
|             | 39                                 | 0.00022332                          | 0.000223322          | 4.2701             | 4.2701                       | T up vs N                              | 22.438      | 19.7368   | 14.0737    | 1         |   |
|             | C1orf94;C1orf94                    | 8.31E-05                            | 8.31E-05             | 4.74182            | 4.74182                      | T up vs N                              | 27.319      | 22.689    | 13.2881    | 1         |   |
|             | OR51E1                             | 4.22E-07                            | 4.22E-07             | 0.190471           | -5.25013                     | T down vs N                            | 66.733      | 25.7551   | 6.17511    | 1         |   |
|             | HIGD1B                             | 9.41E-06                            | 9.41E-06             | 0.249855           | -4.00233                     | T down vs N                            | 40.489      | 18.0151   | 7.1191     | 1         |   |
|             | RRM2;RRM2                          | 0.00026756                          | 0.000267555          | 0.321736           | -3.10814                     | T down vs N                            | 21.611      | 12.045    | 8.91776    | 1         |   |
|             | RHOV                               | 0.0062546                           | 0.0062546            | 0.330778           | -3.02318                     | T down vs N                            | 9.8939      | 11.4634   | 18.5382    | 1         |   |
|             | SIPA1L3                            | 0.00172939                          | 0.00172939           | 0.156887           | -6.37401                     | T down vs N                            | 14.1        | 32.1329   | 36.4627    | 1         |   |
|             | KRTAP13-2                          | 7.32E-05                            | 7.32E-05             | 0.2525             | -3.96039                     | T down vs N                            | 27.986      | 17.7425   | 10.1436    | 1         |   |
|             | MYO16                              | 1.80E-05                            | 1.80E-05             | 9.0538             | 9.0538                       | T up vs N                              | 36.197      | 45.4636   | 20.0959    | 1         |   |
|             | cg24411961                         |                                     |                      |                    |                              |                                        |             |           |            |           |   |
|             |                                    |                                     |                      |                    |                              |                                        |             |           |            |           |   |
|             |                                    |                                     |                      |                    |                              |                                        |             |           |            |           |   |
|             |                                    |                                     |                      |                    |                              |                                        |             |           |            |           |   |
|             |                                    |                                     |                      |                    |                              |                                        |             |           |            |           |   |
|             |                                    |                                     |                      |                    |                              |                                        |             |           |            |           |   |
|             |                                    |                                     |                      |                    |                              |                                        |             |           |            |           |   |
|             |                                    |                                     |                      |                    |                              |                                        |             |           |            |           |   |
|             |                                    |                                     |                      |                    |                              |                                        |             |           |            |           |   |
|             |                                    |                                     |                      |                    |                              |                                        |             |           |            |           |   |
|             |                                    |                                     |                      |                    |                              |                                        |             |           |            |           |   |
|             |                                    |                                     |                      |                    |                              |                                        |             |           |            |           |   |

| Probeset ID | UCSC_REFGENE_NAME                   | p-value<br>(Type) | p-value (T vs.<br>N) | Ratio (T<br>vs. N) | Fold-<br>Change (T<br>vs. N) | Fold-Change (T vs.<br>N) (Description) | F(Type) | SS (Type) | SS (Error) | F (Error) |
|-------------|-------------------------------------|-------------------|----------------------|--------------------|------------------------------|----------------------------------------|---------|-----------|------------|-----------|
| cg24425972  | GJB2                                | 4.59E-05          | 4.59E-05             | 0.33247            | -3.00779                     | T down vs N                            | 30.55   | 11.3579   | 5.94859    | 1         |
| cg24426733  | ZSCAN20                             | 1.51E-05          | 1.51E-05             | 0.193869           | -5.15813                     | T down vs N                            | 37.305  | 25.2088   | 10.8121    | 1         |
| cg24433043  | MUC5B                               | 2.87E-05          | 2.87E-05             | 0.121505           | -8.23009                     | T down vs N                            | 33.301  | 41.612    | 19.9934    | 1         |
| cg24433341  | DNAI2                               | 0.00091684        | 0.000916835          | 0.288154           | -3.47036                     | T down vs N                            | 16.454  | 14.5005   | 14.1006    | 1         |
| cg24435704  | PARP12                              | 4.87E-05          | 4.87E-05             | 0.267437           | -3.73919                     | T down vs N                            | 30.225  | 16.2917   | 8.62413    | 1         |
| cg24435924  | MAST1                               | 0.00116493        | 0.00116493           | 3.95552            | 3.95552                      | T up vs N                              | 15.543  | 17.7108   | 18.2319    | 1         |
| cg24437523  | ATP1A2;ATP1A2                       | 0.00019817        | 0.000198171          | 0.295237           | -3.3871                      | T down vs N                            | 22.996  | 13.94     | 9.6991     | 1         |
| cg24437859  | PTPN6;PTPN6;PTPN6                   | 7.66E-06          | 7.66E-06             | 0.216734           | -4.61395                     | T down vs N                            | 41.934  | 21.899    | 8.35557    | 1         |
| cg24440302  | SIGIRR;SIGIRR;SIGIRR                | 0.00336732        | 0.00336732           | 3.94007            | 3.94007                      | T up vs N                              | 11.83   | 17.6101   | 23.8171    | 1         |
| cg24441810  | TMEM177;TMEM177;TMEM177             | 0.00022049        | 0.000220486          | 0.129129           | -7.74419                     | T down vs N                            | 22.498  | 39.244    | 27.9099    | 1         |
| cg24441922  | ARL4C;ARL4C                         | 5.91E-05          | 5.91E-05             | 0.231767           | -4.31468                     | T down vs N                            | 29.149  | 20.0203   | 10.9894    | 1         |
| cg24442454  | MDGA1                               | 0.00060981        | 0.000609807          | 6.62757            | 6.62757                      | T up vs N                              | 18.072  | 33.5007   | 29.6602    | 1         |
| cg24443250  | TNFSF8                              | 2.44E-06          | 2.44E-06             | 0.179998           | -5.55562                     | T down vs N                            | 50.672  | 27.5419   | 8.6965     | 1         |
| cg24446242  | NOTCH4                              | 0.00034686        | 0.000346863          | 0.32427            | -3.08385                     | T down vs N                            | 20.455  | 11.8789   | 9.29176    | 1         |
| cg24446429  | MBP;MBP                             | 0.00048996        | 0.000489962          | 0.32171            | -3.10839                     | T down vs N                            | 18.976  | 12.0467   | 10.1576    | 1         |
| cg24448870  | CHCHD6                              | 0.00081391        | 0.000813911          | 0.332138           | -3.0108                      | T down vs N                            | 16.918  | 11.3785   | 10.7614    | 1         |
| cg24451422  | TCEA3;TCEA3                         | 0.00066848        | 0.000668477          | 5.72836            | 5.72836                      | T up vs N                              | 17.7    | 28.5342   | 25.7939    | 1         |
| cg24455325  | SLC38A5                             | 5.32E-05          | 5.32E-05             | 0.280474           | -3.5654                      | T down vs N                            | 29.731  | 15.137    | 8.14621    | 1         |
| cg24458833  | XKR8                                | 0.00151171        | 0.00151171           | 8.61932            | 8.61932                      | T up vs N                              | 14.583  | 43.4566   | 47.6794    | 1         |
| cg24459953  | NLRP8                               | 0.00662815        | 0.00662815           | 0.184136           | -5.43077                     | T down vs N                            | 9.7206  | 26.8166   | 44.1398    | 1         |
| cg24460126  | FAM163A                             | 0.00072887        | 0.000728868          | 6.11876            | 6.11876                      | T up vs N                              | 17.354  | 30.7306   | 28.3335    | 1         |
| cg24466610  | AN09                                | 1.54E-05          | 1.54E-05             | 0.178676           | -5.59673                     | T down vs N                            | 37.183  | 27.7792   | 11.9535    | 1         |
| cg24467349  | GSTM5                               | 2.22E-05          | 2.22E-05             | 16.8974            | 16.8974                      | T up vs N                              | 34.868  | 74.8622   | 34.3527    | 1         |
| cg24476363  | HLA-DOA                             | 0.00642088        | 0.00642088           | 0.329451           | -3.03536                     | T down vs N                            | 9.8153  | 11.5469   | 18.8226    | 1         |
| cg24476584  | ZNF837;ZNF837                       | 0.0004732         | 0.000473198          | 0.254962           | -3.92215                     | T down vs N                            | 19.122  | 17.4932   | 14.6373    | 1         |
| cg24478096  | LY75                                | 0.00099251        | 0.000992512          | 13.5194            | 13.5194                      | T up vs N                              | 16.149  | 63.5164   | 62.9306    | 1         |
| cg24478765  | TMEM132E                            | 4.25E-07          | 4.25E-07             | 0.170205           | -5.87526                     | T down vs N                            | 66.67   | 29.3681   | 7.04796    | 1         |
| cg24479524  | UBXN10                              | 0.00263111        | 0.00263111           | 3.57346            | 3.57346                      | T up vs N                              | 12.648  | 15.1909   | 19.2176    | 1         |
| cg24480012  | FAM19A2                             | 0.00322816        | 0.00322816           | 0.194093           | -5.15217                     | T down vs N                            | 11.968  | 25.1733   | 33.6538    | 1         |
| cg24480859  | SLC2A5;SLC2A5;SLC2A5;SLC2A5;SLC2A5  | 0.00140568        | 0.00140568           | 0.188795           | -5.29675                     | T down vs N                            | 14.848  | 26.0305   | 28.051     | 1         |
| cg24481441  | SFRS4                               | 0.00020611        | 0.000206108          | 0.280778           | -3.56154                     | T down vs N                            | 22.812  | 15.1113   | 10.5989    | 1         |
| cg24481868  | PHF11;PHF11                         | 0.00050439        | 0.000504394          | 9.44838            | 9.44838                      | T up vs N                              | 18.854  | 47.2412   | 40.0897    | 1         |
| cg24487856  | CYP21A2;CYP21A2                     | 9.60E-06          | 9.60E-06             | 0.330008           | -3.03023                     | T down vs N                            | 40.349  | 11.5117   | 4.56483    | 1         |
| cg24489015  | LPO;LPO;LPO                         | 3.45E-06          | 3.45E-06             | 0.192674           | -5.19012                     | T down vs N                            | 47.874  | 25.3992   | 8.48871    | 1         |
| cg24490338  | TPM3                                | 1.84E-05          | 1.84E-05             | 0.133279           | -7.50303                     | T down vs N                            | 36.058  | 38.0403   | 16.8794    | 1         |
| cg24493367  | GSTCD;GSTCD                         | 2.47E-05          | 2.47E-05             | 0.213607           | -4.6815                      | T down vs N                            | 34.193  | 22.3173   | 10.4429    | 1         |
| cg24494338  | ING4;ING4;ING4;ING4;ING4            | 9.89E-05          | 9.89E-05             | 0.210117           | -4.75925                     | T down vs N                            | 26.412  | 22.7961   | 13.8094    | 1         |
| cg24496349  | TCIRG1;TCIRG1;TCIRG1                | 0.00026551        | 0.000265512          | 0.282887           | -3.53498                     | T down vs N                            | 21.646  | 14.9337   | 11.0387    | 1         |
| cg24496563  | IL12RB2                             | 0.00360522        | 0.00360522           | 0.291167           | -3.43445                     | T down vs N                            | 11.609  | 14.2591   | 19.6528    | 1         |
| cg24498636  | DAXX;DAXX;DAXX;DAXX                 | 0.00025353        | 0.000253529          | 0.279035           | -3.58378                     | T down vs N                            | 21.855  | 15.2598   | 11.1714    | 1         |
| cg24499627  | C10orf54;CDH23                      | 8.01E-07          | 8.01E-07             | 0.177533           | -5.63276                     | T down vs N                            | 60.458  | 27.9866   | 7.40654    | 1         |
| cg24500959  | MARVELD1;MARVELD1;MARVELD1          | 0.00294264        | 0.00294264           | 0.287039           | -3.48385                     | T down vs N                            | 12.274  | 14.591    | 19.0212    | 1         |
| cg24503712  | TDRKH;TDRKH;TDRKH;TDRKH             | 2.39E-05          | 2.39E-05             | 0.278289           | -3.59339                     | T down vs N                            | 34.405  | 15.3238   | 7.1263     | 1         |
| cg24506130  | CNNM4                               | 0.00620809        | 0.00620809           | 0.317403           | -3.15057                     | T down vs N                            | 10.966  | 9.5937    | 10.4988    | 1         |
| cg24506706  | SDK1;SDK1                           | 0.00385331        | 0.00385331           | 0.313672           | -3.18804                     | T down vs N                            | 11.395  | 12.5902   | 17.6785    | 1         |
| cg24507921  | AFAP1L2;AFAP1L2                     | 1.25E-05          | 1.25E-05             | 9.04657            | 9.04657                      | T up vs N                              | 38.562  | 45.4306   | 18.85      | 1         |
| cg24508713  | ZBTB12                              | 7.18E-05          | 7.18E-05             | 0.307471           | -3.25234                     | T down vs N                            | 29.309  | 12.2613   | 6.27518    | 1         |
| cg24510983  | DUSP12                              | 0.00119143        | 0.00119143           | 0.284084           | -3.52009                     | T down vs N                            | 15.459  | 14.834    | 15.3536    | 1         |
| cg24512544  | EIF2C2;EIF2C2                       | 0.00035683        | 0.000356829          | 4.08808            | 4.08808                      | T up vs N                              | 20.331  | 18.5701   | 14.614     | 1         |
| cg24514600  | PVT1                                | 5.40E-06          | 5.40E-06             | 0.222304           | -4.49834                     | T down vs N                            | 44.465  | 21.1782   | 7.6206     | 1         |
| cg24516516  | INTS10                              | 0.00029528        | 0.000295281          | 0.304601           | -3.28298                     | T down vs N                            | 21.167  | 13.2356   | 10.0046    | 1         |
| cg24519108  | ANGPT2;ANGPT2;ANGPT2;MCPH1          | 3.78E-06          | 3.78E-06             | 0.186392           | -5.36505                     | T down vs N                            | 47.165  | 26.4321   | 8.96668    | 1         |
| cg24519867  | XIRP2;XIRP2                         | 0.00030059        | 0.000300585          | 0.160233           | -6.24092                     | T down vs N                            | 21.088  | 31.405    | 23.828     | 1         |
| cg24523000  | GABRA1;GABRA1;GABRA1                | 0.00552792        | 0.00552792           | 3.3043             | 3.3043                       | T up vs N                              | 10.267  | 13.3801   | 20.8508    | 1         |
| cg24523685  | CLIC6                               | 7.74E-09          | 7.74E-09             | 0.135831           | -7.36207                     | T down vs N                            | 119.72  | 37.3277   | 4.98865    | 1         |
| cg24524414  | SNORD115-15;SNORD115-21;SNORD115-26 | 0.00023084        | 0.000230843          | 0.311502           | -3.21025                     | T down vs N                            | 22.285  | 12.7415   | 9.14793    | 1         |
| cg24524485  | BUB3;BUB3                           | 1.17E-05          | 1.17E-05             | 0.161437           | -6.19435                     | T down vs N                            | 39.002  | 31.1486   | 12.7782    | 1         |
| cg24524895  | PEX11A                              | 0.00327465        | 0.00327465           | 0.305639           | -3.27183                     | T down vs N                            | 11.921  | 13.16     | 17.6624    | 1         |
| cg24529280  | NXP1                                | 2.63E-06          | 2.63E-06             | 51.2069            | 51.2069                      | T up vs N                              | 50.034  | 145.092   | 46.3983    | 1         |
| cg24529484  | SLC8A2                              | 9.32E-05          | 9.32E-05             | 4.50791            | 4.50791                      | T up vs N                              | 26.717  | 21.2381   | 12.7188    | 1         |
| cg24530471  | SCAND3                              | 0.0015888         | 0.0015888            | 0.230059           | -4.34671                     | T down vs N                            | 14.403  | 20.2234   | 22.4651    | 1         |
| cg24532610  | LALBA                               | 2.48E-05          | 2.48E-05             | 0.094412           | -10.5918                     | T down vs N                            | 34.171  | 52.1695   | 24.4274    | 1         |
| cg24533720  | EIF2AK1;EIF2AK1                     | 5.42E-08          | 5.42E-08             | 0.207653           | -4.81573                     | T down vs N                            | 90.624  | 23.1422   | 4.08587    | 1         |
| cg24533904  | C1orf21                             | 8.33E-06          | 8.33E-06             | 0.304538           | -3.28366                     | T down vs N                            | 41.336  | 13.2402   | 5.12498    | 1         |
| cg24534135  | LOC643387;LOC151174;LOC151174       | 0.00011839        | 0.000118385          | 3.59456            | 3.59456                      | T up vs N                              | 25.5    | 15.3316   | 9.61978    | 1         |
| cg24535154  | THOC5;THOC5;THOC5;THOC5             | 5.15E-06          | 5.15E-06             | 0.210273           | -4.75571                     | T down vs N                            | 44.814  | 22.7744   | 8.13112    | 1         |
| cg24535439  | MMP23B                              | 0.00015943        | 0.000159425          | 5.1017             | 5.1017                       | T up vs N                              | 24.034  | 24.8719   | 16.5582    | 1         |
| cg24535650  | MCOLN3                              | 0.00190074        | 0.00190074           | 0.275143           | -3.63448                     | T down vs N                            | 13.766  | 15.5975   | 18.1286    | 1         |

| Probeset ID                                                                             | UCSC_REFGENE_NAME             | p-value<br>(Type) | p-value (T vs.<br>N) | Ratio (T<br>vs. N) | Fold-<br>Change (T<br>vs. N) | Fold-Change (T vs.<br>N) (Description) | F(Type) | SS (Type) | SS (Error) | F (Error) |
|-----------------------------------------------------------------------------------------|-------------------------------|-------------------|----------------------|--------------------|------------------------------|----------------------------------------|---------|-----------|------------|-----------|
| cg24536145                                                                              | SORBS2                        | 4.12E-05          | 4.12E-05             | 0.312273           | -3.20233                     | T down vs N                            | 31.178  | 12.6875   | 6.511      | 1         |
| cg24536163                                                                              | SERPINB13                     | 9.93E-06          | 9.93E-06             | 0.151535           | -6.59915                     | T down vs N                            | 40.118  | 33.3486   | 13.3002    | 1         |
| cg24536691                                                                              | VPS52;RPS18                   | 0.00159335        | 0.00159335           | 0.298121           | -3.35434                     | T down vs N                            | 14.393  | 13.7188   | 15.2504    | 1         |
| cg24537237                                                                              | MUC5B                         | 3.44E-05          | 3.44E-05             | 0.215113           | -4.64871                     | T down vs N                            | 32.219  | 22.1145   | 10.9823    | 1         |
| cg24539060                                                                              | DNAH17                        | 0.00034371        | 0.000343709          | 0.322315           | -3.10256                     | T down vs N                            | 20.495  | 12.0068   | 9.37345    | 1         |
| cg24539517                                                                              | GRK5                          | 0.0001873         | 0.000187302          | 0.308988           | -3.23638                     | T down vs N                            | 23.262  | 12.9191   | 8.88591    | 1         |
| cg24540269                                                                              | PPP1R2P1                      | 8.92E-06          | 8.92E-06             | 0.328797           | -3.04139                     | T down vs N                            | 40.856  | 11.5883   | 4.53817    | 1         |
| cg24541193                                                                              | SLC19A2                       | 0.00069722        | 0.000697224          | 0.2498             | -4.0032                      | T down vs N                            | 17.531  | 18.0207   | 16.4472    | 1         |
| cg24541426                                                                              | HOXD3                         | 4.60E-05          | 4.60E-05             | 18.4295            | 18.4295                      | T up vs N                              | 30.546  | 79.5293   | 41.6572    | 1         |
| LOC100133991;LOC100133991;C1orf46                                                       |                               |                   |                      |                    |                              |                                        |         |           |            |           |
| cg24542751                                                                              | 46                            | 0.00356575        | 0.00356575           | 3.24053            | 3.24053                      | T up vs N                              | 11.644  | 12.9474   | 17.7904    | 1         |
| cg24543015                                                                              | MAGI2                         | 3.54E-05          | 3.54E-05             | 4.46552            | 4.46552                      | T up vs N                              | 32.044  | 20.9724   | 10.4717    | 1         |
| cg24544490                                                                              | RUSC1;RUSC1;C1orf104          | 5.80E-06          | 5.80E-06             | 7.07716            | 7.07716                      | T up vs N                              | 43.936  | 35.8663   | 13.0614    | 1         |
| cg24544512                                                                              | SIM1                          | 0.00048785        | 0.000487851          | 0.271938           | -3.67731                     | T down vs N                            | 18.994  | 15.882    | 13.3788    | 1         |
| cg24547137                                                                              | MIR1180;B9D1                  | 3.36E-05          | 3.36E-05             | 0.193892           | -5.15752                     | T down vs N                            | 32.365  | 25.2052   | 12.4605    | 1         |
| cg24549609                                                                              | CORIN                         | 2.30E-05          | 2.30E-05             | 0.25829            | -3.87162                     | T down vs N                            | 34.645  | 17.1628   | 7.92635    | 1         |
| cg24550149                                                                              | TTC22                         | 0.00010619        | 0.000106186          | 10.6044            | 10.6044                      | T up vs N                              | 26.05   | 52.2218   | 32.0746    | 1         |
| cg24550644                                                                              | MYO1D                         | 0.00696663        | 0.00696663           | 0.268516           | -3.72417                     | T down vs N                            | 9.5729  | 16.1923   | 27.0635    | 1         |
| cg24553547                                                                              | MIR1180;B9D1                  | 0.00022208        | 0.000222082          | 0.254362           | -3.9314                      | T down vs N                            | 22.464  | 17.5536   | 12.5025    | 1         |
| cg24555639                                                                              | HEXDC                         | 0.00042805        | 0.000428046          | 0.290796           | -3.43883                     | T down vs N                            | 19.546  | 14.2886   | 11.6961    | 1         |
| cg24559969                                                                              | TRPCS2;ZCCHC16                | 0.00707002        | 0.00707002           | 3.4669             | 3.4669                       | T up vs N                              | 9.5295  | 14.4773   | 24.3074    | 1         |
| cg24561952                                                                              | ORS2H1                        | 2.35E-05          | 2.35E-05             | 0.269786           | -3.70664                     | T down vs N                            | 34.511  | 16.0764   | 7.45343    | 1         |
| cg24563967                                                                              | EVPL                          | 2.36E-05          | 2.36E-05             | 0.229806           | -4.35149                     | T down vs N                            | 34.493  | 20.2536   | 9.39502    | 1         |
| cg24564096                                                                              | SORCS2                        | 0.00012776        | 0.000127756          | 0.276447           | -3.61733                     | T down vs N                            | 25.12   | 15.4834   | 9.86222    | 1         |
| DBNDD2;DBNDD2;DBNDD2;DBNDD2;S                                                           |                               |                   |                      |                    |                              |                                        |         |           |            |           |
| cg24567464                                                                              | YS1-DBNDD2;DBNDD2;DBNDD2      | 0.00525255        | 0.00525255           | 3.04661            | 3.04661                      | T up vs N                              | 10.424  | 11.624    | 17.8424    | 1         |
| cg24567694                                                                              | LOC100132707;LOC100132707     | 0.00017088        | 0.000170884          | 0.269424           | -3.71162                     | T down vs N                            | 23.699  | 16.1093   | 10.8758    | 1         |
| PCDHGA4;PCDHGA11;PCDHGA11;PCDHGA9;PCDHGA1;PCDHGB1;PCDHGB6;PCDHGA12;PCDHGB3;PCDHGB7;PCDH |                               |                   |                      |                    |                              |                                        |         |           |            |           |
| cg24576050                                                                              | PCDHGA12;PCDHGB3;PCDHGB7;PCDH | 5.34E-05          | 5.34E-05             | 3.48013            | 3.48013                      | T up vs N                              | 29.707  | 14.5661   | 7.84521    | 1         |
| cg24576260                                                                              | SCNN1D;SCNN1D;SCNN1D          | 0.00015117        | 0.000151168          | 0.232925           | -4.29323                     | T down vs N                            | 24.292  | 19.884    | 13.0969    | 1         |
| cg24578857                                                                              | PLD6                          | 0.00144732        | 0.00144732           | 0.141635           | -7.06038                     | T down vs N                            | 14.741  | 35.7794   | 38.8353    | 1         |
| cg24580724                                                                              | CRYZ;CRYZ;CRYZ;CRYZ           | 0.00130161        | 0.00130161           | 0.315125           | -3.17335                     | T down vs N                            | 15.13   | 12.4901   | 13.2082    | 1         |
| cg24581749                                                                              | RPH3AL                        | 0.00255116        | 0.00255116           | 0.309797           | -3.09797                     | T down vs N                            | 12.752  | 11.9755   | 15.0262    | 1         |
| cg24583987                                                                              | GUCA2B                        | 9.01E-06          | 9.01E-06             | 0.225914           | -4.42646                     | T down vs N                            | 40.788  | 20.7269   | 8.13061    | 1         |
| cg24585000                                                                              | KCNAB2;KCNAB2                 | 8.08E-05          | 8.08E-05             | 0.278777           | -3.58709                     | T down vs N                            | 27.467  | 15.2818   | 8.90207    | 1         |
| cg24586978                                                                              | DOCK9;DOCK9;DOCK9;DOCK9       | 1.45E-05          | 1.45E-05             | 3.47314            | 3.47314                      | T up vs N                              | 37.568  | 14.5191   | 6.18354    | 1         |
| cg24588859                                                                              | LAMA5                         | 0.00010025        | 0.000100252          | 0.261854           | -3.81892                     | T down vs N                            | 26.344  | 16.817    | 10.2138    | 1         |
| cg24592370                                                                              | GALNT9;LOC100130238           | 0.00331251        | 0.00331251           | 3.1726             | 3.1726                       | T up vs N                              | 11.884  | 12.485    | 16.8094    | 1         |
| cg24592546                                                                              | TRIM15                        | 5.00E-05          | 5.00E-05             | 0.182931           | -5.46655                     | T down vs N                            | 30.077  | 27.0251   | 14.3768    | 1         |
| cg24595510                                                                              | SCR2                          | 0.00042225        | 0.000422245          | 6.10652            | 6.10652                      | T up vs N                              | 19.605  | 30.6627   | 25.0248    | 1         |
| cg24595606                                                                              | NR2E1                         | 1.53E-06          | 1.53E-06             | 0.123203           | -8.11668                     | T down vs N                            | 54.616  | 41.066    | 12.0306    | 1         |
| cg24596132                                                                              | MFGES;MFGES                   | 1.35E-05          | 1.35E-05             | 0.241565           | -4.13968                     | T down vs N                            | 38.052  | 18.9024   | 7.94809    | 1         |
| cg24600221                                                                              | IGF1R                         | 0.00168596        | 0.00168596           | 0.239897           | -4.16845                     | T down vs N                            | 14.191  | 19.0872   | 21.5207    | 1         |
| cg24602369                                                                              | PDZRN3                        | 0.00089627        | 0.000896268          | 0.281879           | -3.54762                     | T down vs N                            | 16.542  | 15.0183   | 14.5265    | 1         |
| cg24603113                                                                              | C7orf50;C7orf50;C7orf50       | 0.00535248        | 0.00535248           | 0.295447           | -3.38471                     | T down vs N                            | 10.366  | 13.9239   | 21.4918    | 1         |
| cg24603235                                                                              | ITPR3                         | 3.52E-05          | 3.52E-05             | 0.305886           | -3.26919                     | T down vs N                            | 32.08   | 13.142    | 6.5547     | 1         |
| cg24603972                                                                              | SLC16A9                       | 3.02E-05          | 3.02E-05             | 0.258743           | -3.86484                     | T down vs N                            | 32.999  | 17.1184   | 8.30017    | 1         |
| cg24605023                                                                              | CADPS;CADPS;CADPS             | 0.00025661        | 0.000256605          | 0.332044           | -3.01165                     | T down vs N                            | 21.801  | 11.3844   | 8.35533    | 1         |
| cg24608381                                                                              | NXP2                          | 0.00284381        | 0.00284381           | 3.77979            | 3.77979                      | T up vs N                              | 12.387  | 16.5595   | 21.3895    | 1         |
| cg24611608                                                                              | EYA1                          | 2.14E-05          | 2.14E-05             | 0.282613           | -3.53841                     | T down vs N                            | 35.094  | 14.9567   | 6.81893    | 1         |
| cg24613097                                                                              | TMEM132C                      | 3.82E-06          | 3.82E-06             | 0.261202           | -3.82845                     | T down vs N                            | 47.079  | 16.8797   | 5.73663    | 1         |
| cg24613375                                                                              | MCF2L;MCF2L                   | 0.00605879        | 0.00605879           | 0.290216           | -3.44571                     | T down vs N                            | 9.9895  | 14.3348   | 22.9599    | 1         |
| cg24616382                                                                              | GAL3ST4                       | 0.00044957        | 0.000449565          | 0.253759           | -3.94075                     | T down vs N                            | 19.338  | 17.6146   | 14.574     | 1         |
| cg24617568                                                                              | DPY19L2P4                     | 3.57E-05          | 3.57E-05             | 3.51405            | 3.51405                      | T up vs N                              | 31.998  | 14.7935   | 7.39718    | 1         |
| cg24620418                                                                              | C15orf55                      | 0.0006545         | 0.000654503          | 0.270918           | -3.69115                     | T down vs N                            | 17.785  | 15.9737   | 14.3706    | 1         |
| cg24620436                                                                              | RADIL                         | 0.00607616        | 0.00607616           | 0.135666           | -7.37102                     | T down vs N                            | 9.9808  | 37.3731   | 59.9119    | 1         |
| cg24626554                                                                              | LOC389458                     | 0.00059962        | 0.000599618          | 0.27631            | -3.61912                     | T down vs N                            | 18.14   | 15.4953   | 13.667     | 1         |
| cg24626659                                                                              | C10orf93                      | 1.57E-05          | 1.57E-05             | 0.14348            | -6.9696                      | T down vs N                            | 37.063  | 35.3071   | 15.242     | 1         |
| cg24627299                                                                              | MET;MET                       | 0.00310676        | 0.00310676           | 0.316782           | -3.15675                     | T down vs N                            | 12.094  | 12.3769   | 16.3741    | 1         |
| cg24627332                                                                              | FILIP1                        | 0.00206207        | 0.00206207           | 0.273961           | -3.65016                     | T down vs N                            | 13.481  | 15.7017   | 18.6353    | 1         |
| cg24627900                                                                              | HPYR1                         | 0.00107891        | 0.00107891           | 0.233181           | -4.28851                     | T down vs N                            | 15.831  | 19.854    | 20.0654    | 1         |
| cg24630825                                                                              | GPM6A;GPM6A                   | 0.00191877        | 0.00191877           | 0.294694           | -3.39335                     | T down vs N                            | 13.733  | 13.9822   | 16.2905    | 1         |
| cg24630957                                                                              | KIAA1033                      | 2.95E-05          | 2.95E-05             | 0.127893           | -7.81905                     | T down vs N                            | 33.126  | 39.6137   | 19.1335    | 1         |
| cg24631102                                                                              | NPS                           | 0.00037833        | 0.000378333          | 0.149101           | -6.70687                     | T down vs N                            | 20.077  | 33.9234   | 27.0349    | 1         |
| cg24631735                                                                              | DZIP1L;DZIP1L                 | 0.00429565        | 0.00429565           | 0.296671           | -3.37073                     | T down vs N                            | 11.05   | 13.8295   | 20.0255    | 1         |
| cg24632920                                                                              | MSRA;MSRA;MSRA                | 0.00719737        | 0.00719737           | 0.275884           | -3.62471                     | T down vs N                            | 9.4769  | 15.5325   | 26.2238    | 1         |
| cg24633291                                                                              | CYP2W1                        | 5.75E-05          | 5.75E-05             | 0.281193           | -3.55628                     | T down vs N                            | 29.301  | 15.0761   | 8.23232    | 1         |
| cg24633648                                                                              | TC2N;TC2N;TC2N                | 1.80E-05          | 1.80E-05             | 11.6916            | 11.6916                      | T up vs N                              | 36.171  | 56.6281   | 25.0489    | 1         |
| cg24633771                                                                              | C8orf56                       | 8.44E-05          | 8.44E-05             | 0.235125           | -4.25307                     | T down vs N                            | 27.239  | 19.6283   | 11.5296    | 1         |

| Probeset ID                                                                             | UCSC_REFGENE_NAME             | p-value<br>(Type) | p-value (T vs.<br>N) | Ratio (T<br>vs. N) | Fold-<br>Change (T<br>vs. N) | Fold-Change (T vs.<br>N) (Description) | F(Type) | SS (Type) | SS (Error) | F (Error) |
|-----------------------------------------------------------------------------------------|-------------------------------|-------------------|----------------------|--------------------|------------------------------|----------------------------------------|---------|-----------|------------|-----------|
| cg24636657                                                                              | SERPINA7                      | 0.00233381        | 0.00233381           | 0.267817           | -3.73389                     | T down vs N                            | 13.054  | 16.2566   | 19.9249    | 1         |
| cg24637044                                                                              | RNF39;RNF39                   | 0.00023041        | 0.00023041           | 7.47113            | 7.47113                      | T up vs N                              | 22.294  | 37.8796   | 27.1857    | 1         |
| cg24637308                                                                              | DNHD1                         | 6.61E-05          | 6.61E-05             | 4.48301            | 4.48301                      | T up vs N                              | 28.539  | 21.0822   | 11.8194    | 1         |
| cg24637426                                                                              | FGF12                         | 2.50E-06          | 2.50E-06             | 25.6887            | 25.6887                      | T up vs N                              | 50.453  | 98.6898   | 31.2974    | 1         |
| cg24640676                                                                              | C21orf29;KRTAP10-9            | 2.16E-05          | 2.16E-05             | 0.270475           | -3.6972                      | T down vs N                            | 35.033  | 16.0138   | 7.31375    | 1         |
| cg24640697                                                                              | GN5                           | 6.51E-05          | 6.51E-05             | 0.268836           | -3.71974                     | T down vs N                            | 28.617  | 16.1631   | 9.03699    | 1         |
| cg24640735                                                                              | CLEC2A                        | 0.00027219        | 0.000272188          | 0.319333           | -3.13153                     | T down vs N                            | 21.533  | 12.2048   | 9.06863    | 1         |
| cg24642523                                                                              | HSPA2                         | 0.00191874        | 0.00191874           | 4.75936            | 4.75936                      | T up vs N                              | 13.733  | 22.7968   | 26.5602    | 1         |
| cg24642933                                                                              | SLC22A24                      | 6.04E-07          | 6.04E-07             | 0.155828           | -6.41732                     | T down vs N                            | 63.157  | 32.3683   | 8.2001     | 1         |
| PCDHA6;PCDHA2;PCDHA1;PCDHA9;PCDHA7;PCDHA1;PCDHA6;PCDHA5;PCDHA10;PCDHA3;PCDHA4;PCDHA10;P |                               |                   |                      |                    |                              |                                        |         |           |            |           |
| cg24648119                                                                              | HA10;PCDHA3;PCDHA4;PCDHA10;P  | 7.90E-06          | 7.90E-06             | 3.9993             | 3.9993                       | T up vs N                              | 41.708  | 17.9954   | 6.90344    | 1         |
| cg24650501                                                                              | LMX1A;LMX1A                   | 0.00732224        | 0.00732224           | 3.10253            | 3.10253                      | T up vs N                              | 9.4263  | 12.0066   | 20.3797    | 1         |
| cg24651828                                                                              | JAKMIP2                       | 0.00117534        | 0.00117534           | 0.221043           | -4.52402                     | T down vs N                            | 15.509  | 21.3388   | 22.0139    | 1         |
| cg24652956                                                                              | ORS2R1                        | 2.35E-05          | 2.35E-05             | 0.19253            | -5.19398                     | T down vs N                            | 34.499  | 25.4222   | 11.7903    | 1         |
| cg24653181                                                                              | RHCG                          | 5.72E-05          | 5.72E-05             | 3.30606            | 3.30606                      | T up vs N                              | 29.331  | 13.3921   | 7.30535    | 1         |
| PCDHGA4;PCDHGA6;PCDHGA9;PCDHGA1;PCDHGA8;PCDHGA5;PCDHGB1;PCDHGA10;PCDHGB4;PCDHGA3;PCDHGA |                               |                   |                      |                    |                              |                                        |         |           |            |           |
| cg24656271                                                                              | DHGA10;PCDHGB4;PCDHGA3;PCDHGA | 0.00104637        | 0.00104637           | 4.1195             | 4.1195                       | T up vs N                              | 15.948  | 18.7726   | 18.8344    | 1         |
| cg24658360                                                                              | ENOX1;ENOX1                   | 1.59E-06          | 1.59E-06             | 0.286184           | -3.49426                     | T down vs N                            | 54.248  | 14.6609   | 4.32412    | 1         |
| cg24661860                                                                              | CASZ1;CASZ1                   | 0.00072242        | 0.00072242           | 0.28314            | -3.53182                     | T down vs N                            | 17.389  | 14.9126   | 13.7214    | 1         |
| cg24663514                                                                              | FAM98B;FAM98B                 | 0.00062504        | 0.000625037          | 0.160555           | -6.2284                      | T down vs N                            | 17.971  | 31.3362   | 27.8987    | 1         |
| cg24666876                                                                              | SRPX2;SRPX2                   | 5.37E-05          | 5.37E-05             | 0.267892           | -3.73285                     | T down vs N                            | 29.673  | 16.2497   | 8.76197    | 1         |
| cg24667326                                                                              | SPRR3;SPRR3                   | 0.00112719        | 0.00112719           | 0.21246            | -4.70676                     | T down vs N                            | 15.666  | 22.4732   | 22.9519    | 1         |
| PRG4;PRG4;PRG4;PRG4;PRG4;P                                                              |                               |                   |                      |                    |                              |                                        |         |           |            |           |
| cg24669741                                                                              | RG4;MIR548F1;PRG4             | 0.00018476        | 0.00018476           | 0.317279           | -3.1518                      | T down vs N                            | 23.327  | 12.3431   | 8.46614    | 1         |
| cg24669786                                                                              | SAMD9                         | 6.77E-06          | 6.77E-06             | 0.21234            | -4.70944                     | T down vs N                            | 42.811  | 22.4897   | 8.40512    | 1         |
| cg24670241                                                                              | NCRNA00032;NCRNA00032         | 0.00017321        | 0.000173211          | 0.316486           | -3.1597                      | T down vs N                            | 23.635  | 12.397    | 8.39246    | 1         |
| cg24671344                                                                              | PDPN;PDPN;PDPN;PDPN           | 0.0050322         | 0.0050322            | 19.0206            | 19.0206                      | T up vs N                              | 10.556  | 81.2619   | 123.175    | 1         |
| cg24671734                                                                              | BTBD11                        | 0.00016996        | 0.000169962          | 0.132851           | -7.52723                     | T down vs N                            | 23.725  | 38.162    | 25.7359    | 1         |
| cg24672310                                                                              | GATA1                         | 3.81E-06          | 3.81E-06             | 0.284189           | -3.51878                     | T down vs N                            | 47.108  | 14.8253   | 5.03536    | 1         |
| cg24672777                                                                              | OR4C45                        | 9.63E-06          | 9.63E-06             | 0.134988           | -7.40808                     | T down vs N                            | 40.326  | 37.561    | 14.903     | 1         |
| cg24673101                                                                              | CCDC85C                       | 0.00243093        | 0.00243093           | 4.60504            | 4.60504                      | T up vs N                              | 12.915  | 21.8437   | 27.0609    | 1         |
| cg24673742                                                                              | GRIK3                         | 0.00184288        | 0.00184288           | 0.263377           | -3.79684                     | T down vs N                            | 13.875  | 16.6719   | 19.2254    | 1         |
| cg24674887                                                                              | TMCO4                         | 0.00016939        | 0.00016939           | 0.313237           | -3.19247                     | T down vs N                            | 23.742  | 12.6204   | 8.50521    | 1         |
| cg24675344                                                                              | KCNN3;KCNN3                   | 0.00023253        | 0.000232528          | 5.01608            | 5.01608                      | T up vs N                              | 22.252  | 24.358    | 17.5145    | 1         |
| cg24676071                                                                              | ADCY1                         | 0.00020552        | 0.000205519          | 11.4284            | 11.4284                      | T up vs N                              | 22.825  | 55.5843   | 38.9635    | 1         |
| cg24677002                                                                              | C1QA                          | 0.00182153        | 0.00182153           | 0.278466           | -3.5911                      | T down vs N                            | 13.916  | 15.3086   | 17.6011    | 1         |
| cg24677093                                                                              | C10orf41;C10orf41             | 9.26E-06          | 9.26E-06             | 11.3918            | 11.3918                      | T up vs N                              | 40.6    | 55.4382   | 21.8473    | 1         |
| cg24677278                                                                              | GPX6                          | 4.30E-05          | 4.30E-05             | 0.315903           | -3.16553                     | T down vs N                            | 30.928  | 12.4368   | 6.43386    | 1         |
| cg24677671                                                                              | GTF2H4                        | 3.16E-05          | 3.16E-05             | 0.266473           | -3.75272                     | T down vs N                            | 32.727  | 16.381    | 8.00854    | 1         |
| cg24678095                                                                              | GALNT3                        | 0.00180366        | 0.00180366           | 20.2716            | 20.2716                      | T up vs N                              | 14.314  | 79.8253   | 83.6532    | 1         |
| cg24679420                                                                              | MORN1                         | 2.02E-05          | 2.02E-05             | 0.278967           | -3.58466                     | T down vs N                            | 35.46   | 15.2656   | 6.88802    | 1         |
| cg24681654                                                                              | CCDC129                       | 0.00058719        | 0.00058719           | 0.2487             | -4.02091                     | T down vs N                            | 18.226  | 18.1356   | 15.9206    | 1         |
| cg24682036                                                                              | DSG2                          | 9.11E-05          | 9.11E-05             | 6.46255            | 6.46255                      | T up vs N                              | 26.84   | 32.6134   | 19.4416    | 1         |
| cg24682512                                                                              | GRM3                          | 0.00346162        | 0.00346162           | 3.12686            | 3.12686                      | T up vs N                              | 11.74   | 12.1729   | 16.5894    | 1         |
| cg24684349                                                                              | CCND3;CCND3                   | 2.62E-05          | 2.62E-05             | 0.170708           | -5.85795                     | T down vs N                            | 33.856  | 29.2703   | 13.8327    | 1         |
| cg24685006                                                                              | TFAP2E                        | 0.00066842        | 0.000668424          | 3.44645            | 3.44645                      | T up vs N                              | 17.7    | 14.3398   | 12.9624    | 1         |
| cg24685998                                                                              | LRIG3;LRIG3;LRIG3             | 0.00080753        | 0.000807528          | 0.268158           | -3.72914                     | T down vs N                            | 16.948  | 16.2253   | 15.3173    | 1         |
| cg24686357                                                                              | TEC                           | 0.00053037        | 0.000530369          | 6.48892            | 6.48892                      | T up vs N                              | 18.645  | 32.7559   | 28.1086    | 1         |
| cg24688309                                                                              | CDH4                          | 0.00239326        | 0.00239326           | 0.238598           | -4.19115                     | T down vs N                            | 12.969  | 19.2326   | 23.7285    | 1         |
| cg24688655                                                                              | FUJ32063                      | 2.37E-06          | 2.37E-06             | 0.33029            | -3.02764                     | T down vs N                            | 50.89   | 11.494    | 3.61379    | 1         |
| cg24690071                                                                              | ZIC2                          | 0.00363678        | 0.00363678           | 3.9304             | 3.9304                       | T up vs N                              | 11.581  | 17.5471   | 24.2433    | 1         |
| cg24690231                                                                              | IGSF21                        | 8.22E-07          | 8.22E-07             | 21.2306            | 21.2306                      | T up vs N                              | 60.214  | 87.44     | 23.2344    | 1         |
| cg24691042                                                                              | UBTD2                         | 0.00319505        | 0.00319505           | 0.22517            | -4.44109                     | T down vs N                            | 12.002  | 20.8189   | 27.7541    | 1         |
| cg24692170                                                                              | KLHDC8A                       | 0.00017814        | 0.000178144          | 0.31975            | -3.12744                     | T down vs N                            | 23.501  | 12.1768   | 8.29044    | 1         |
| cg24692872                                                                              | TAS1R2                        | 0.00107297        | 0.00107297           | 0.260071           | -3.84511                     | T down vs N                            | 15.852  | 16.9891   | 17.1473    | 1         |
| cg24693053                                                                              | MFS1D7                        | 0.00109314        | 0.00109314           | 3.87698            | 3.87698                      | T up vs N                              | 15.782  | 17.1979   | 17.4356    | 1         |
| cg24696207                                                                              | NUSAP1;NUSAP1;OIP5;NUSAP1     | 4.15E-05          | 4.15E-05             | 0.204739           | -4.88426                     | T down vs N                            | 31.125  | 23.5601   | 12.1113    | 1         |
| cg24697184                                                                              | TTC22;TTC22                   | 0.00021033        | 0.000210329          | 3.61454            | 3.61454                      | T up vs N                              | 22.717  | 15.4648   | 10.8921    | 1         |
| cg24697648                                                                              | NOTCH4                        | 2.35E-05          | 2.35E-05             | 0.294963           | -3.39026                     | T down vs N                            | 34.509  | 13.9613   | 6.47318    | 1         |
| cg24699146                                                                              | HMGCL;HMGCL                   | 0.00076715        | 0.000767145          | 3.28053            | 3.28053                      | T up vs N                              | 17.151  | 13.219    | 12.3321    | 1         |
| cg24699296                                                                              | TRAPPC5;TRAPPC5;TRAPPC5       | 0.00154845        | 0.00154845           | 3.50004            | 3.50004                      | T up vs N                              | 14.496  | 14.6996   | 16.2246    | 1         |
| cg24699493                                                                              | P2RX1                         | 2.68E-05          | 2.68E-05             | 0.181906           | -5.49736                     | T down vs N                            | 33.704  | 27.2043   | 12.9143    | 1         |
| cg24699871                                                                              | TRIM10;TRIM10                 | 5.19E-05          | 5.19E-05             | 0.196039           | -5.10101                     | T down vs N                            | 29.862  | 24.8678   | 13.324     | 1         |
| cg24702147                                                                              | MIR141;MIR200C                | 0.00025805        | 0.000258052          | 3.2389             | 3.2389                       | T up vs N                              | 21.775  | 12.9363   | 9.5055     | 1         |
| cg24702341                                                                              | GTF2IRD1;GTF2IRD1             | 1.03E-05          | 1.03E-05             | 0.211269           | -4.73331                     | T down vs N                            | 39.836  | 22.6367   | 9.09199    | 1         |
| cg24703661                                                                              | CD79A;CD79A;CD79A;CD79A       | 2.89E-05          | 2.89E-05             | 0.223008           | -4.48415                     | T down vs N                            | 33.254  | 21.0893   | 10.1471    | 1         |
| cg24704177                                                                              | HOXD3                         | 0.00038561        | 0.000385614          | 7.512              | 7.512                        | T up vs N                              | 19.994  | 38.0854   | 30.4769    | 1         |
| cg24706115                                                                              | TRPV4;TRPV4                   | 0.00031766        | 0.00031766           | 0.282074           | -3.54517                     | T down vs N                            | 20.842  | 15.0019   | 11.5165    | 1         |

| Probeset ID | UCSC_REFGENE_NAME                                                                                                                                                                                                                                                                                                                                                                                                                                                                                                                                                                                                                                                                                                                                                                                                                                                                                                                                                                                                                                                                                                                                                                                                                                                                                                                                                                                                                                                                                                                                                                                                                                                                                                                                                                                                                                                                                                                                                                                                                                                                                                                                                                                                                                                                                                                                                                                                                                                                                                                                                                                                                                                                                                                                                                                                                                                                                                                                                                                                                                                                                                                                                                                                                                                                                                                                                                                                                                                                                                                                                                                                                                                                                                                                                                                                                                                                                                                                                                                                                                                                                                                                                                                                                                                                                                                                                                                                                                                                                                                                                                                                                                                                                                                                                                                                                                                   | p-value<br>(Type) | p-value (T vs.<br>N) | Ratio (T<br>vs. N) | Fold-<br>Change (T<br>vs. N) | Fold-Change (T vs.<br>N) (Description) | F(Type) | SS (Type) | SS (Error) | F (Error) |
|-------------|---------------------------------------------------------------------------------------------------------------------------------------------------------------------------------------------------------------------------------------------------------------------------------------------------------------------------------------------------------------------------------------------------------------------------------------------------------------------------------------------------------------------------------------------------------------------------------------------------------------------------------------------------------------------------------------------------------------------------------------------------------------------------------------------------------------------------------------------------------------------------------------------------------------------------------------------------------------------------------------------------------------------------------------------------------------------------------------------------------------------------------------------------------------------------------------------------------------------------------------------------------------------------------------------------------------------------------------------------------------------------------------------------------------------------------------------------------------------------------------------------------------------------------------------------------------------------------------------------------------------------------------------------------------------------------------------------------------------------------------------------------------------------------------------------------------------------------------------------------------------------------------------------------------------------------------------------------------------------------------------------------------------------------------------------------------------------------------------------------------------------------------------------------------------------------------------------------------------------------------------------------------------------------------------------------------------------------------------------------------------------------------------------------------------------------------------------------------------------------------------------------------------------------------------------------------------------------------------------------------------------------------------------------------------------------------------------------------------------------------------------------------------------------------------------------------------------------------------------------------------------------------------------------------------------------------------------------------------------------------------------------------------------------------------------------------------------------------------------------------------------------------------------------------------------------------------------------------------------------------------------------------------------------------------------------------------------------------------------------------------------------------------------------------------------------------------------------------------------------------------------------------------------------------------------------------------------------------------------------------------------------------------------------------------------------------------------------------------------------------------------------------------------------------------------------------------------------------------------------------------------------------------------------------------------------------------------------------------------------------------------------------------------------------------------------------------------------------------------------------------------------------------------------------------------------------------------------------------------------------------------------------------------------------------------------------------------------------------------------------------------------------------------------------------------------------------------------------------------------------------------------------------------------------------------------------------------------------------------------------------------------------------------------------------------------------------------------------------------------------------------------------------------------------------------------------------------------------------------------------------|-------------------|----------------------|--------------------|------------------------------|----------------------------------------|---------|-----------|------------|-----------|
| cg24713667  | C6orf150                                                                                                                                                                                                                                                                                                                                                                                                                                                                                                                                                                                                                                                                                                                                                                                                                                                                                                                                                                                                                                                                                                                                                                                                                                                                                                                                                                                                                                                                                                                                                                                                                                                                                                                                                                                                                                                                                                                                                                                                                                                                                                                                                                                                                                                                                                                                                                                                                                                                                                                                                                                                                                                                                                                                                                                                                                                                                                                                                                                                                                                                                                                                                                                                                                                                                                                                                                                                                                                                                                                                                                                                                                                                                                                                                                                                                                                                                                                                                                                                                                                                                                                                                                                                                                                                                                                                                                                                                                                                                                                                                                                                                                                                                                                                                                                                                                                            | 0.00016903        | 0.000169028          | 0.215504           | -4.64028                     | T down vs N                            | 23.752  | 22.0623   | 14.8619    | 1         |
| cg24715272  | TRIM39;TRIM39                                                                                                                                                                                                                                                                                                                                                                                                                                                                                                                                                                                                                                                                                                                                                                                                                                                                                                                                                                                                                                                                                                                                                                                                                                                                                                                                                                                                                                                                                                                                                                                                                                                                                                                                                                                                                                                                                                                                                                                                                                                                                                                                                                                                                                                                                                                                                                                                                                                                                                                                                                                                                                                                                                                                                                                                                                                                                                                                                                                                                                                                                                                                                                                                                                                                                                                                                                                                                                                                                                                                                                                                                                                                                                                                                                                                                                                                                                                                                                                                                                                                                                                                                                                                                                                                                                                                                                                                                                                                                                                                                                                                                                                                                                                                                                                                                                                       | 0.00011815        | 0.000118147          | 0.305442           | -3.27394                     | T down vs N                            | 25.51   | 13.1743   | 8.26289    | 1         |
| cg24715815  | DNAJC10                                                                                                                                                                                                                                                                                                                                                                                                                                                                                                                                                                                                                                                                                                                                                                                                                                                                                                                                                                                                                                                                                                                                                                                                                                                                                                                                                                                                                                                                                                                                                                                                                                                                                                                                                                                                                                                                                                                                                                                                                                                                                                                                                                                                                                                                                                                                                                                                                                                                                                                                                                                                                                                                                                                                                                                                                                                                                                                                                                                                                                                                                                                                                                                                                                                                                                                                                                                                                                                                                                                                                                                                                                                                                                                                                                                                                                                                                                                                                                                                                                                                                                                                                                                                                                                                                                                                                                                                                                                                                                                                                                                                                                                                                                                                                                                                                                                             | 9.63E-05          | 9.63E-05             | 0.323              | -3.09597                     | T down vs N                            | 26.553  | 11.9618   | 7.20771    | 1         |
| cg24718827  | ANKRD33B                                                                                                                                                                                                                                                                                                                                                                                                                                                                                                                                                                                                                                                                                                                                                                                                                                                                                                                                                                                                                                                                                                                                                                                                                                                                                                                                                                                                                                                                                                                                                                                                                                                                                                                                                                                                                                                                                                                                                                                                                                                                                                                                                                                                                                                                                                                                                                                                                                                                                                                                                                                                                                                                                                                                                                                                                                                                                                                                                                                                                                                                                                                                                                                                                                                                                                                                                                                                                                                                                                                                                                                                                                                                                                                                                                                                                                                                                                                                                                                                                                                                                                                                                                                                                                                                                                                                                                                                                                                                                                                                                                                                                                                                                                                                                                                                                                                            | 0.00018495        | 0.000184952          | 3.16032            | 3.16032                      | T up vs N                              | 23.322  | 12.4013   | 8.50783    | 1         |
| cg24719853  | SH3RF3                                                                                                                                                                                                                                                                                                                                                                                                                                                                                                                                                                                                                                                                                                                                                                                                                                                                                                                                                                                                                                                                                                                                                                                                                                                                                                                                                                                                                                                                                                                                                                                                                                                                                                                                                                                                                                                                                                                                                                                                                                                                                                                                                                                                                                                                                                                                                                                                                                                                                                                                                                                                                                                                                                                                                                                                                                                                                                                                                                                                                                                                                                                                                                                                                                                                                                                                                                                                                                                                                                                                                                                                                                                                                                                                                                                                                                                                                                                                                                                                                                                                                                                                                                                                                                                                                                                                                                                                                                                                                                                                                                                                                                                                                                                                                                                                                                                              | 0.00031093        | 0.000310931          | 0.216182           | -4.62573                     | T down vs N                            | 20.937  | 21.9721   | 16.7908    | 1         |
| cg24720583  | BCL6B                                                                                                                                                                                                                                                                                                                                                                                                                                                                                                                                                                                                                                                                                                                                                                                                                                                                                                                                                                                                                                                                                                                                                                                                                                                                                                                                                                                                                                                                                                                                                                                                                                                                                                                                                                                                                                                                                                                                                                                                                                                                                                                                                                                                                                                                                                                                                                                                                                                                                                                                                                                                                                                                                                                                                                                                                                                                                                                                                                                                                                                                                                                                                                                                                                                                                                                                                                                                                                                                                                                                                                                                                                                                                                                                                                                                                                                                                                                                                                                                                                                                                                                                                                                                                                                                                                                                                                                                                                                                                                                                                                                                                                                                                                                                                                                                                                                               | 0.00028805        | 0.000288054          | 22.0869            | 22.0869                      | T up vs N                              | 21.278  | 89.7179   | 67.4626    | 1         |
| cg24720672  | LOC283663                                                                                                                                                                                                                                                                                                                                                                                                                                                                                                                                                                                                                                                                                                                                                                                                                                                                                                                                                                                                                                                                                                                                                                                                                                                                                                                                                                                                                                                                                                                                                                                                                                                                                                                                                                                                                                                                                                                                                                                                                                                                                                                                                                                                                                                                                                                                                                                                                                                                                                                                                                                                                                                                                                                                                                                                                                                                                                                                                                                                                                                                                                                                                                                                                                                                                                                                                                                                                                                                                                                                                                                                                                                                                                                                                                                                                                                                                                                                                                                                                                                                                                                                                                                                                                                                                                                                                                                                                                                                                                                                                                                                                                                                                                                                                                                                                                                           | 0.00336675        | 0.00336675           | 3.528              | 3.528                        | T up vs N                              | 11.831  | 14.887    | 20.1332    | 1         |
| cg24720717  | LRR8C8D;LRR8C8D                                                                                                                                                                                                                                                                                                                                                                                                                                                                                                                                                                                                                                                                                                                                                                                                                                                                                                                                                                                                                                                                                                                                                                                                                                                                                                                                                                                                                                                                                                                                                                                                                                                                                                                                                                                                                                                                                                                                                                                                                                                                                                                                                                                                                                                                                                                                                                                                                                                                                                                                                                                                                                                                                                                                                                                                                                                                                                                                                                                                                                                                                                                                                                                                                                                                                                                                                                                                                                                                                                                                                                                                                                                                                                                                                                                                                                                                                                                                                                                                                                                                                                                                                                                                                                                                                                                                                                                                                                                                                                                                                                                                                                                                                                                                                                                                                                                     | 0.00099287        | 0.000992869          | 0.162096           | -6.16917                     | T down vs N                            | 17.174  | 27.1334   | 22.1191    | 1         |
| cg24722763  | TP53TG5;SYS1-DBNDD2                                                                                                                                                                                                                                                                                                                                                                                                                                                                                                                                                                                                                                                                                                                                                                                                                                                                                                                                                                                                                                                                                                                                                                                                                                                                                                                                                                                                                                                                                                                                                                                                                                                                                                                                                                                                                                                                                                                                                                                                                                                                                                                                                                                                                                                                                                                                                                                                                                                                                                                                                                                                                                                                                                                                                                                                                                                                                                                                                                                                                                                                                                                                                                                                                                                                                                                                                                                                                                                                                                                                                                                                                                                                                                                                                                                                                                                                                                                                                                                                                                                                                                                                                                                                                                                                                                                                                                                                                                                                                                                                                                                                                                                                                                                                                                                                                                                 | 0.00012573        | 0.000125729          | 9.22007            | 9.22007                      | T up vs N                              | 25.199  | 46.2177   | 29.3456    | 1         |
| cg24724596  | LIM2;LIM2                                                                                                                                                                                                                                                                                                                                                                                                                                                                                                                                                                                                                                                                                                                                                                                                                                                                                                                                                                                                                                                                                                                                                                                                                                                                                                                                                                                                                                                                                                                                                                                                                                                                                                                                                                                                                                                                                                                                                                                                                                                                                                                                                                                                                                                                                                                                                                                                                                                                                                                                                                                                                                                                                                                                                                                                                                                                                                                                                                                                                                                                                                                                                                                                                                                                                                                                                                                                                                                                                                                                                                                                                                                                                                                                                                                                                                                                                                                                                                                                                                                                                                                                                                                                                                                                                                                                                                                                                                                                                                                                                                                                                                                                                                                                                                                                                                                           | 1.48E-05          | 1.48E-05             | 0.284055           | -3.52044                     | T down vs N                            | 37.425  | 14.8364   | 6.34294    | 1         |
| cg24724664  | MAP1D                                                                                                                                                                                                                                                                                                                                                                                                                                                                                                                                                                                                                                                                                                                                                                                                                                                                                                                                                                                                                                                                                                                                                                                                                                                                                                                                                                                                                                                                                                                                                                                                                                                                                                                                                                                                                                                                                                                                                                                                                                                                                                                                                                                                                                                                                                                                                                                                                                                                                                                                                                                                                                                                                                                                                                                                                                                                                                                                                                                                                                                                                                                                                                                                                                                                                                                                                                                                                                                                                                                                                                                                                                                                                                                                                                                                                                                                                                                                                                                                                                                                                                                                                                                                                                                                                                                                                                                                                                                                                                                                                                                                                                                                                                                                                                                                                                                               | 0.00024008        | 0.000240077          | 3.93652            | 3.93652                      | T up vs N                              | 22.105  | 17.587    | 12.7299    | 1         |
| cg24727203  | PPP1R3B                                                                                                                                                                                                                                                                                                                                                                                                                                                                                                                                                                                                                                                                                                                                                                                                                                                                                                                                                                                                                                                                                                                                                                                                                                                                                                                                                                                                                                                                                                                                                                                                                                                                                                                                                                                                                                                                                                                                                                                                                                                                                                                                                                                                                                                                                                                                                                                                                                                                                                                                                                                                                                                                                                                                                                                                                                                                                                                                                                                                                                                                                                                                                                                                                                                                                                                                                                                                                                                                                                                                                                                                                                                                                                                                                                                                                                                                                                                                                                                                                                                                                                                                                                                                                                                                                                                                                                                                                                                                                                                                                                                                                                                                                                                                                                                                                                                             | 1.74E-06          | 1.74E-06             | 0.23338            | -4.28486                     | T down vs N                            | 53.469  | 19.8308   | 5.93418    | 1         |
| cg24728050  | MRGPRE                                                                                                                                                                                                                                                                                                                                                                                                                                                                                                                                                                                                                                                                                                                                                                                                                                                                                                                                                                                                                                                                                                                                                                                                                                                                                                                                                                                                                                                                                                                                                                                                                                                                                                                                                                                                                                                                                                                                                                                                                                                                                                                                                                                                                                                                                                                                                                                                                                                                                                                                                                                                                                                                                                                                                                                                                                                                                                                                                                                                                                                                                                                                                                                                                                                                                                                                                                                                                                                                                                                                                                                                                                                                                                                                                                                                                                                                                                                                                                                                                                                                                                                                                                                                                                                                                                                                                                                                                                                                                                                                                                                                                                                                                                                                                                                                                                                              | 0.00217547        | 0.00217547           | 0.325498           | -3.07222                     | T down vs N                            | 13.296  | 11.7993   | 14.1991    | 1         |
| cg24728468  | FABP5;FABP5                                                                                                                                                                                                                                                                                                                                                                                                                                                                                                                                                                                                                                                                                                                                                                                                                                                                                                                                                                                                                                                                                                                                                                                                                                                                                                                                                                                                                                                                                                                                                                                                                                                                                                                                                                                                                                                                                                                                                                                                                                                                                                                                                                                                                                                                                                                                                                                                                                                                                                                                                                                                                                                                                                                                                                                                                                                                                                                                                                                                                                                                                                                                                                                                                                                                                                                                                                                                                                                                                                                                                                                                                                                                                                                                                                                                                                                                                                                                                                                                                                                                                                                                                                                                                                                                                                                                                                                                                                                                                                                                                                                                                                                                                                                                                                                                                                                         | 2.07E-05          | 2.07E-05             | 14.7238            | 14.7238                      | T up vs N                              | 35.314  | 67.7476   | 30.6947    | 1         |
| cg24729498  | PDE6B;PDE6B                                                                                                                                                                                                                                                                                                                                                                                                                                                                                                                                                                                                                                                                                                                                                                                                                                                                                                                                                                                                                                                                                                                                                                                                                                                                                                                                                                                                                                                                                                                                                                                                                                                                                                                                                                                                                                                                                                                                                                                                                                                                                                                                                                                                                                                                                                                                                                                                                                                                                                                                                                                                                                                                                                                                                                                                                                                                                                                                                                                                                                                                                                                                                                                                                                                                                                                                                                                                                                                                                                                                                                                                                                                                                                                                                                                                                                                                                                                                                                                                                                                                                                                                                                                                                                                                                                                                                                                                                                                                                                                                                                                                                                                                                                                                                                                                                                                         | 0.00041208        | 0.000412075          | 0.324957           | -3.07733                     | T down vs N                            | 19.709  | 11.8343   | 9.60727    | 1         |
| cg24731731  | C11orf9;C11orf9                                                                                                                                                                                                                                                                                                                                                                                                                                                                                                                                                                                                                                                                                                                                                                                                                                                                                                                                                                                                                                                                                                                                                                                                                                                                                                                                                                                                                                                                                                                                                                                                                                                                                                                                                                                                                                                                                                                                                                                                                                                                                                                                                                                                                                                                                                                                                                                                                                                                                                                                                                                                                                                                                                                                                                                                                                                                                                                                                                                                                                                                                                                                                                                                                                                                                                                                                                                                                                                                                                                                                                                                                                                                                                                                                                                                                                                                                                                                                                                                                                                                                                                                                                                                                                                                                                                                                                                                                                                                                                                                                                                                                                                                                                                                                                                                                                                     | 3.60E-05          | 3.60E-05             | 3.25958            | 3.25958                      | T up vs N                              | 31.953  | 13.0768   | 6.548      | 1         |
| cg24734792  | EGR2                                                                                                                                                                                                                                                                                                                                                                                                                                                                                                                                                                                                                                                                                                                                                                                                                                                                                                                                                                                                                                                                                                                                                                                                                                                                                                                                                                                                                                                                                                                                                                                                                                                                                                                                                                                                                                                                                                                                                                                                                                                                                                                                                                                                                                                                                                                                                                                                                                                                                                                                                                                                                                                                                                                                                                                                                                                                                                                                                                                                                                                                                                                                                                                                                                                                                                                                                                                                                                                                                                                                                                                                                                                                                                                                                                                                                                                                                                                                                                                                                                                                                                                                                                                                                                                                                                                                                                                                                                                                                                                                                                                                                                                                                                                                                                                                                                                                | 0.00034997        | 0.000349969          | 0.290662           | -3.44042                     | T down vs N                            | 20.416  | 14.2992   | 11.2063    | 1         |
| cg24738806  | NHSL2                                                                                                                                                                                                                                                                                                                                                                                                                                                                                                                                                                                                                                                                                                                                                                                                                                                                                                                                                                                                                                                                                                                                                                                                                                                                                                                                                                                                                                                                                                                                                                                                                                                                                                                                                                                                                                                                                                                                                                                                                                                                                                                                                                                                                                                                                                                                                                                                                                                                                                                                                                                                                                                                                                                                                                                                                                                                                                                                                                                                                                                                                                                                                                                                                                                                                                                                                                                                                                                                                                                                                                                                                                                                                                                                                                                                                                                                                                                                                                                                                                                                                                                                                                                                                                                                                                                                                                                                                                                                                                                                                                                                                                                                                                                                                                                                                                                               | 0.00015556        | 0.000155558          | 0.277485           | -3.6038                      | T down vs N                            | 24.152  | 15.3933   | 10.1974    | 1         |
| cg24740818  | C15orf27                                                                                                                                                                                                                                                                                                                                                                                                                                                                                                                                                                                                                                                                                                                                                                                                                                                                                                                                                                                                                                                                                                                                                                                                                                                                                                                                                                                                                                                                                                                                                                                                                                                                                                                                                                                                                                                                                                                                                                                                                                                                                                                                                                                                                                                                                                                                                                                                                                                                                                                                                                                                                                                                                                                                                                                                                                                                                                                                                                                                                                                                                                                                                                                                                                                                                                                                                                                                                                                                                                                                                                                                                                                                                                                                                                                                                                                                                                                                                                                                                                                                                                                                                                                                                                                                                                                                                                                                                                                                                                                                                                                                                                                                                                                                                                                                                                                            | 0.00018726        | 0.000187263          | 0.242798           | -4.11865                     | T down vs N                            | 23.263  | 18.7671   | 12.9076    | 1         |
| cg24740868  | C1orf87;C1orf87                                                                                                                                                                                                                                                                                                                                                                                                                                                                                                                                                                                                                                                                                                                                                                                                                                                                                                                                                                                                                                                                                                                                                                                                                                                                                                                                                                                                                                                                                                                                                                                                                                                                                                                                                                                                                                                                                                                                                                                                                                                                                                                                                                                                                                                                                                                                                                                                                                                                                                                                                                                                                                                                                                                                                                                                                                                                                                                                                                                                                                                                                                                                                                                                                                                                                                                                                                                                                                                                                                                                                                                                                                                                                                                                                                                                                                                                                                                                                                                                                                                                                                                                                                                                                                                                                                                                                                                                                                                                                                                                                                                                                                                                                                                                                                                                                                                     | 1.72E-05          | 1.72E-05             | 7.94718            | 7.94718                      | T up vs N                              | 36.455  | 40.2424   | 17.6624    | 1         |
| cg24741770  | FAAH2                                                                                                                                                                                                                                                                                                                                                                                                                                                                                                                                                                                                                                                                                                                                                                                                                                                                                                                                                                                                                                                                                                                                                                                                                                                                                                                                                                                                                                                                                                                                                                                                                                                                                                                                                                                                                                                                                                                                                                                                                                                                                                                                                                                                                                                                                                                                                                                                                                                                                                                                                                                                                                                                                                                                                                                                                                                                                                                                                                                                                                                                                                                                                                                                                                                                                                                                                                                                                                                                                                                                                                                                                                                                                                                                                                                                                                                                                                                                                                                                                                                                                                                                                                                                                                                                                                                                                                                                                                                                                                                                                                                                                                                                                                                                                                                                                                                               | 0.0001278         | 0.000127802          | 0.236647           | -4.22571                     | T down vs N                            | 25.118  | 19.4537   | 12.392     | 1         |
| cg24742746  | ZIC2                                                                                                                                                                                                                                                                                                                                                                                                                                                                                                                                                                                                                                                                                                                                                                                                                                                                                                                                                                                                                                                                                                                                                                                                                                                                                                                                                                                                                                                                                                                                                                                                                                                                                                                                                                                                                                                                                                                                                                                                                                                                                                                                                                                                                                                                                                                                                                                                                                                                                                                                                                                                                                                                                                                                                                                                                                                                                                                                                                                                                                                                                                                                                                                                                                                                                                                                                                                                                                                                                                                                                                                                                                                                                                                                                                                                                                                                                                                                                                                                                                                                                                                                                                                                                                                                                                                                                                                                                                                                                                                                                                                                                                                                                                                                                                                                                                                                | 0.00302196        | 0.00302196           | 0.268066           | -3.73043                     | T down vs N                            | 12.185  | 16.2337   | 21.3157    | 1         |
| cg24743639  | EHD3;EHD3                                                                                                                                                                                                                                                                                                                                                                                                                                                                                                                                                                                                                                                                                                                                                                                                                                                                                                                                                                                                                                                                                                                                                                                                                                                                                                                                                                                                                                                                                                                                                                                                                                                                                                                                                                                                                                                                                                                                                                                                                                                                                                                                                                                                                                                                                                                                                                                                                                                                                                                                                                                                                                                                                                                                                                                                                                                                                                                                                                                                                                                                                                                                                                                                                                                                                                                                                                                                                                                                                                                                                                                                                                                                                                                                                                                                                                                                                                                                                                                                                                                                                                                                                                                                                                                                                                                                                                                                                                                                                                                                                                                                                                                                                                                                                                                                                                                           | 0.00527589        | 0.00527589           | 0.259774           | -3.8495                      | T down vs N                            | 10.881  | 14.8906   | 19.1582    | 1         |
| cg24744697  | ARFIP2;FXC1                                                                                                                                                                                                                                                                                                                                                                                                                                                                                                                                                                                                                                                                                                                                                                                                                                                                                                                                                                                                                                                                                                                                                                                                                                                                                                                                                                                                                                                                                                                                                                                                                                                                                                                                                                                                                                                                                                                                                                                                                                                                                                                                                                                                                                                                                                                                                                                                                                                                                                                                                                                                                                                                                                                                                                                                                                                                                                                                                                                                                                                                                                                                                                                                                                                                                                                                                                                                                                                                                                                                                                                                                                                                                                                                                                                                                                                                                                                                                                                                                                                                                                                                                                                                                                                                                                                                                                                                                                                                                                                                                                                                                                                                                                                                                                                                                                                         | 0.00031764        | 0.000317637          | 0.245459           | -4.07401                     | T down vs N                            | 20.843  | 18.4792   | 14.1857    | 1         |
| cg24745495  | EPHX3;EPHX3                                                                                                                                                                                                                                                                                                                                                                                                                                                                                                                                                                                                                                                                                                                                                                                                                                                                                                                                                                                                                                                                                                                                                                                                                                                                                                                                                                                                                                                                                                                                                                                                                                                                                                                                                                                                                                                                                                                                                                                                                                                                                                                                                                                                                                                                                                                                                                                                                                                                                                                                                                                                                                                                                                                                                                                                                                                                                                                                                                                                                                                                                                                                                                                                                                                                                                                                                                                                                                                                                                                                                                                                                                                                                                                                                                                                                                                                                                                                                                                                                                                                                                                                                                                                                                                                                                                                                                                                                                                                                                                                                                                                                                                                                                                                                                                                                                                         | 6.96E-06          | 6.96E-06             | 8.39906            | 8.39906                      | T up vs N                              | 42.618  | 42.4183   | 15.9252    | 1         |
| cg24746106  | MCF2L;MCF2L                                                                                                                                                                                                                                                                                                                                                                                                                                                                                                                                                                                                                                                                                                                                                                                                                                                                                                                                                                                                                                                                                                                                                                                                                                                                                                                                                                                                                                                                                                                                                                                                                                                                                                                                                                                                                                                                                                                                                                                                                                                                                                                                                                                                                                                                                                                                                                                                                                                                                                                                                                                                                                                                                                                                                                                                                                                                                                                                                                                                                                                                                                                                                                                                                                                                                                                                                                                                                                                                                                                                                                                                                                                                                                                                                                                                                                                                                                                                                                                                                                                                                                                                                                                                                                                                                                                                                                                                                                                                                                                                                                                                                                                                                                                                                                                                                                                         | 0.00021729        | 0.000217293          | 8.50042            | 8.50042                      | T up vs N                              | 22.565  | 42.8979   | 30.4169    | 1         |
| cg24746666  | SPATS2L;SPATS2L;SPATS2L;SPATS2L                                                                                                                                                                                                                                                                                                                                                                                                                                                                                                                                                                                                                                                                                                                                                                                                                                                                                                                                                                                                                                                                                                                                                                                                                                                                                                                                                                                                                                                                                                                                                                                                                                                                                                                                                                                                                                                                                                                                                                                                                                                                                                                                                                                                                                                                                                                                                                                                                                                                                                                                                                                                                                                                                                                                                                                                                                                                                                                                                                                                                                                                                                                                                                                                                                                                                                                                                                                                                                                                                                                                                                                                                                                                                                                                                                                                                                                                                                                                                                                                                                                                                                                                                                                                                                                                                                                                                                                                                                                                                                                                                                                                                                                                                                                                                                                                                                     | 0.00059207        | 0.000592067          | 0.265117           | -3.77192                     | T down vs N                            | 18.192  | 16.5076   | 14.5184    | 1         |
| cg24748448  | TRPV1;TRPV1;TRPV1;TRPV1                                                                                                                                                                                                                                                                                                                                                                                                                                                                                                                                                                                                                                                                                                                                                                                                                                                                                                                                                                                                                                                                                                                                                                                                                                                                                                                                                                                                                                                                                                                                                                                                                                                                                                                                                                                                                                                                                                                                                                                                                                                                                                                                                                                                                                                                                                                                                                                                                                                                                                                                                                                                                                                                                                                                                                                                                                                                                                                                                                                                                                                                                                                                                                                                                                                                                                                                                                                                                                                                                                                                                                                                                                                                                                                                                                                                                                                                                                                                                                                                                                                                                                                                                                                                                                                                                                                                                                                                                                                                                                                                                                                                                                                                                                                                                                                                                                             | 0.00052646        | 0.000526458          | 0.292757           | -4.35242                     | T down vs N                            | 18.676  | 20.2595   | 17.3566    | 1         |
| cg24748769  | OTX2;OTX2                                                                                                                                                                                                                                                                                                                                                                                                                                                                                                                                                                                                                                                                                                                                                                                                                                                                                                                                                                                                                                                                                                                                                                                                                                                                                                                                                                                                                                                                                                                                                                                                                                                                                                                                                                                                                                                                                                                                                                                                                                                                                                                                                                                                                                                                                                                                                                                                                                                                                                                                                                                                                                                                                                                                                                                                                                                                                                                                                                                                                                                                                                                                                                                                                                                                                                                                                                                                                                                                                                                                                                                                                                                                                                                                                                                                                                                                                                                                                                                                                                                                                                                                                                                                                                                                                                                                                                                                                                                                                                                                                                                                                                                                                                                                                                                                                                                           | 3.57E-05          | 3.57E-05             | 0.102244           | -9.78053                     | T down vs N                            | 32.002  | 48.7058   | 24.3514    | 1         |
| cg24748868  | AKAP12;AKAP12                                                                                                                                                                                                                                                                                                                                                                                                                                                                                                                                                                                                                                                                                                                                                                                                                                                                                                                                                                                                                                                                                                                                                                                                                                                                                                                                                                                                                                                                                                                                                                                                                                                                                                                                                                                                                                                                                                                                                                                                                                                                                                                                                                                                                                                                                                                                                                                                                                                                                                                                                                                                                                                                                                                                                                                                                                                                                                                                                                                                                                                                                                                                                                                                                                                                                                                                                                                                                                                                                                                                                                                                                                                                                                                                                                                                                                                                                                                                                                                                                                                                                                                                                                                                                                                                                                                                                                                                                                                                                                                                                                                                                                                                                                                                                                                                                                                       | 0.00340616        | 0.00340616           | 0.311614           | -3.2091                      | T down vs N                            | 11.793  | 12.7336   | 17.2763    | 1         |
| cg24749265  | TREM1L2P                                                                                                                                                                                                                                                                                                                                                                                                                                                                                                                                                                                                                                                                                                                                                                                                                                                                                                                                                                                                                                                                                                                                                                                                                                                                                                                                                                                                                                                                                                                                                                                                                                                                                                                                                                                                                                                                                                                                                                                                                                                                                                                                                                                                                                                                                                                                                                                                                                                                                                                                                                                                                                                                                                                                                                                                                                                                                                                                                                                                                                                                                                                                                                                                                                                                                                                                                                                                                                                                                                                                                                                                                                                                                                                                                                                                                                                                                                                                                                                                                                                                                                                                                                                                                                                                                                                                                                                                                                                                                                                                                                                                                                                                                                                                                                                                                                                            | 0.00011137        | 0.000111367          | 0.235566           | -4.2451                      | T down vs N                            | 25.808  | 19.5775   | 12.1372    | 1         |
| cg24750308  | NOX4;NOX4;NOX4;NOX4                                                                                                                                                                                                                                                                                                                                                                                                                                                                                                                                                                                                                                                                                                                                                                                                                                                                                                                                                                                                                                                                                                                                                                                                                                                                                                                                                                                                                                                                                                                                                                                                                                                                                                                                                                                                                                                                                                                                                                                                                                                                                                                                                                                                                                                                                                                                                                                                                                                                                                                                                                                                                                                                                                                                                                                                                                                                                                                                                                                                                                                                                                                                                                                                                                                                                                                                                                                                                                                                                                                                                                                                                                                                                                                                                                                                                                                                                                                                                                                                                                                                                                                                                                                                                                                                                                                                                                                                                                                                                                                                                                                                                                                                                                                                                                                                                                                 | 6.13E-05          | 6.13E-05             | 0.302113           | -3.31002                     | T down vs N                            | 28.951  | 13.4189   | 7.41619    | 1         |
| cg24750887  | HERC3                                                                                                                                                                                                                                                                                                                                                                                                                                                                                                                                                                                                                                                                                                                                                                                                                                                                                                                                                                                                                                                                                                                                                                                                                                                                                                                                                                                                                                                                                                                                                                                                                                                                                                                                                                                                                                                                                                                                                                                                                                                                                                                                                                                                                                                                                                                                                                                                                                                                                                                                                                                                                                                                                                                                                                                                                                                                                                                                                                                                                                                                                                                                                                                                                                                                                                                                                                                                                                                                                                                                                                                                                                                                                                                                                                                                                                                                                                                                                                                                                                                                                                                                                                                                                                                                                                                                                                                                                                                                                                                                                                                                                                                                                                                                                                                                                                                               | 7.49E-07          | 7.49E-07             | 0.297535           | -3.36095                     | T down vs N                            | 61.096  | 13.7635   | 3.60443    | 1         |
| cg24751551  | KCNJ15;KCNJ15                                                                                                                                                                                                                                                                                                                                                                                                                                                                                                                                                                                                                                                                                                                                                                                                                                                                                                                                                                                                                                                                                                                                                                                                                                                                                                                                                                                                                                                                                                                                                                                                                                                                                                                                                                                                                                                                                                                                                                                                                                                                                                                                                                                                                                                                                                                                                                                                                                                                                                                                                                                                                                                                                                                                                                                                                                                                                                                                                                                                                                                                                                                                                                                                                                                                                                                                                                                                                                                                                                                                                                                                                                                                                                                                                                                                                                                                                                                                                                                                                                                                                                                                                                                                                                                                                                                                                                                                                                                                                                                                                                                                                                                                                                                                                                                                                                                       | 9.51E-05          | 9.51E-05             | 0.212973           | -4.69542                     | T down vs N                            | 26.614  | 22.4032   | 13.4684    | 1         |
| cg24759821  | PAH                                                                                                                                                                                                                                                                                                                                                                                                                                                                                                                                                                                                                                                                                                                                                                                                                                                                                                                                                                                                                                                                                                                                                                                                                                                                                                                                                                                                                                                                                                                                                                                                                                                                                                                                                                                                                                                                                                                                                                                                                                                                                                                                                                                                                                                                                                                                                                                                                                                                                                                                                                                                                                                                                                                                                                                                                                                                                                                                                                                                                                                                                                                                                                                                                                                                                                                                                                                                                                                                                                                                                                                                                                                                                                                                                                                                                                                                                                                                                                                                                                                                                                                                                                                                                                                                                                                                                                                                                                                                                                                                                                                                                                                                                                                                                                                                                                                                 | 0.00010639        | 0.000106391          | 5.97499            | 5.97499                      | T up vs N                              | 26.04   | 29.9291   | 18.3894    | 1         |
| cg24760023  | PRSS16                                                                                                                                                                                                                                                                                                                                                                                                                                                                                                                                                                                                                                                                                                                                                                                                                                                                                                                                                                                                                                                                                                                                                                                                                                                                                                                                                                                                                                                                                                                                                                                                                                                                                                                                                                                                                                                                                                                                                                                                                                                                                                                                                                                                                                                                                                                                                                                                                                                                                                                                                                                                                                                                                                                                                                                                                                                                                                                                                                                                                                                                                                                                                                                                                                                                                                                                                                                                                                                                                                                                                                                                                                                                                                                                                                                                                                                                                                                                                                                                                                                                                                                                                                                                                                                                                                                                                                                                                                                                                                                                                                                                                                                                                                                                                                                                                                                              | 1.12E-05          | 1.12E-05             | 0.255351           | -3.91617                     | T down vs N                            | 39.299  | 17.4542   | 7.10614    | 1         |
| cg24761827  | MAGEC1                                                                                                                                                                                                                                                                                                                                                                                                                                                                                                                                                                                                                                                                                                                                                                                                                                                                                                                                                                                                                                                                                                                                                                                                                                                                                                                                                                                                                                                                                                                                                                                                                                                                                                                                                                                                                                                                                                                                                                                                                                                                                                                                                                                                                                                                                                                                                                                                                                                                                                                                                                                                                                                                                                                                                                                                                                                                                                                                                                                                                                                                                                                                                                                                                                                                                                                                                                                                                                                                                                                                                                                                                                                                                                                                                                                                                                                                                                                                                                                                                                                                                                                                                                                                                                                                                                                                                                                                                                                                                                                                                                                                                                                                                                                                                                                                                                                              | 0.00021425        | 0.000214247          | 0.321053           | -3.11475                     | T down vs N                            | 22.631  | 12.0902   | 8.54771    | 1         |
| cg24761867  | LOC389333                                                                                                                                                                                                                                                                                                                                                                                                                                                                                                                                                                                                                                                                                                                                                                                                                                                                                                                                                                                                                                                                                                                                                                                                                                                                                                                                                                                                                                                                                                                                                                                                                                                                                                                                                                                                                                                                                                                                                                                                                                                                                                                                                                                                                                                                                                                                                                                                                                                                                                                                                                                                                                                                                                                                                                                                                                                                                                                                                                                                                                                                                                                                                                                                                                                                                                                                                                                                                                                                                                                                                                                                                                                                                                                                                                                                                                                                                                                                                                                                                                                                                                                                                                                                                                                                                                                                                                                                                                                                                                                                                                                                                                                                                                                                                                                                                                                           | 2.62E-06          | 2.62E-06             | 33.9158            | 33.9158                      | T up vs N                              | 50.085  | 116.307   | 37.155     | 1         |
| cg24765079  | CDH1                                                                                                                                                                                                                                                                                                                                                                                                                                                                                                                                                                                                                                                                                                                                                                                                                                                                                                                                                                                                                                                                                                                                                                                                                                                                                                                                                                                                                                                                                                                                                                                                                                                                                                                                                                                                                                                                                                                                                                                                                                                                                                                                                                                                                                                                                                                                                                                                                                                                                                                                                                                                                                                                                                                                                                                                                                                                                                                                                                                                                                                                                                                                                                                                                                                                                                                                                                                                                                                                                                                                                                                                                                                                                                                                                                                                                                                                                                                                                                                                                                                                                                                                                                                                                                                                                                                                                                                                                                                                                                                                                                                                                                                                                                                                                                                                                                                                | 0.00074042        | 0.000740419          | 3.92946            | 3.92946                      | T up vs N                              | 17.291  | 17.5409   | 16.2312    | 1         |
| cg24765446  | WFD6C                                                                                                                                                                                                                                                                                                                                                                                                                                                                                                                                                                                                                                                                                                                                                                                                                                                                                                                                                                                                                                                                                                                                                                                                                                                                                                                                                                                                                                                                                                                                                                                                                                                                                                                                                                                                                                                                                                                                                                                                                                                                                                                                                                                                                                                                                                                                                                                                                                                                                                                                                                                                                                                                                                                                                                                                                                                                                                                                                                                                                                                                                                                                                                                                                                                                                                                                                                                                                                                                                                                                                                                                                                                                                                                                                                                                                                                                                                                                                                                                                                                                                                                                                                                                                                                                                                                                                                                                                                                                                                                                                                                                                                                                                                                                                                                                                                                               | 3.13E-05          | 3.13E-05             | 0.204423           | -4.89181                     | T down vs N                            | 32.785  | 23.6061   | 11.5203    | 1         |
| cg24766030  | CCL14;CCL14-CCL15;CCL14-CCL15;CCL14                                                                                                                                                                                                                                                                                                                                                                                                                                                                                                                                                                                                                                                                                                                                                                                                                                                                                                                                                                                                                                                                                                                                                                                                                                                                                                                                                                                                                                                                                                                                                                                                                                                                                                                                                                                                                                                                                                                                                                                                                                                                                                                                                                                                                                                                                                                                                                                                                                                                                                                                                                                                                                                                                                                                                                                                                                                                                                                                                                                                                                                                                                                                                                                                                                                                                                                                                                                                                                                                                                                                                                                                                                                                                                                                                                                                                                                                                                                                                                                                                                                                                                                                                                                                                                                                                                                                                                                                                                                                                                                                                                                                                                                                                                                                                                                                                                 | 3.31E-06          | 3.31E-06             | 0.212593           | -4.70383                     | T down vs N                            | 48.211  | 22.4551   | 7.45231    | 1         |
| cg24768002  | MAML2                                                                                                                                                                                                                                                                                                                                                                                                                                                                                                                                                                                                                                                                                                                                                                                                                                                                                                                                                                                                                                                                                                                                                                                                                                                                                                                                                                                                                                                                                                                                                                                                                                                                                                                                                                                                                                                                                                                                                                                                                                                                                                                                                                                                                                                                                                                                                                                                                                                                                                                                                                                                                                                                                                                                                                                                                                                                                                                                                                                                                                                                                                                                                                                                                                                                                                                                                                                                                                                                                                                                                                                                                                                                                                                                                                                                                                                                                                                                                                                                                                                                                                                                                                                                                                                                                                                                                                                                                                                                                                                                                                                                                                                                                                                                                                                                                                                               | 6.78E-06          | 6.78E-06             | 0.278532           | -3.59025                     | T down vs N                            | 42.801  | 15.3029   | 5.72062    | 1         |
| cg24768116  | KRTCAP3;KRTCAP3                                                                                                                                                                                                                                                                                                                                                                                                                                                                                                                                                                                                                                                                                                                                                                                                                                                                                                                                                                                                                                                                                                                                                                                                                                                                                                                                                                                                                                                                                                                                                                                                                                                                                                                                                                                                                                                                                                                                                                                                                                                                                                                                                                                                                                                                                                                                                                                                                                                                                                                                                                                                                                                                                                                                                                                                                                                                                                                                                                                                                                                                                                                                                                                                                                                                                                                                                                                                                                                                                                                                                                                                                                                                                                                                                                                                                                                                                                                                                                                                                                                                                                                                                                                                                                                                                                                                                                                                                                                                                                                                                                                                                                                                                                                                                                                                                                                     | 0.00049609        | 0.000496085          | 3.77664            | 3.77664                      | T up vs N                              | 18.924  | 16.5388   | 13.9836    | 1         |
| cg24770596  | PSD                                                                                                                                                                                                                                                                                                                                                                                                                                                                                                                                                                                                                                                                                                                                                                                                                                                                                                                                                                                                                                                                                                                                                                                                                                                                                                                                                                                                                                                                                                                                                                                                                                                                                                                                                                                                                                                                                                                                                                                                                                                                                                                                                                                                                                                                                                                                                                                                                                                                                                                                                                                                                                                                                                                                                                                                                                                                                                                                                                                                                                                                                                                                                                                                                                                                                                                                                                                                                                                                                                                                                                                                                                                                                                                                                                                                                                                                                                                                                                                                                                                                                                                                                                                                                                                                                                                                                                                                                                                                                                                                                                                                                                                                                                                                                                                                                                                                 | 0.00010036        | 0.000100362          | 19.0924            | 19.0924                      | T up vs N                              | 26.338  | 81.4699   | 49.4914    | 1         |
| cg24780236  | TAS2R40                                                                                                                                                                                                                                                                                                                                                                                                                                                                                                                                                                                                                                                                                                                                                                                                                                                                                                                                                                                                                                                                                                                                                                                                                                                                                                                                                                                                                                                                                                                                                                                                                                                                                                                                                                                                                                                                                                                                                                                                                                                                                                                                                                                                                                                                                                                                                                                                                                                                                                                                                                                                                                                                                                                                                                                                                                                                                                                                                                                                                                                                                                                                                                                                                                                                                                                                                                                                                                                                                                                                                                                                                                                                                                                                                                                                                                                                                                                                                                                                                                                                                                                                                                                                                                                                                                                                                                                                                                                                                                                                                                                                                                                                                                                                                                                                                                                             | 7.85E-05          | 7.85E-05             | 0.254165           | -3.93446                     | T down vs N                            | 27.618  | 17.5735   | 10.181     | 1         |
| cg24780966  | C18orf1;C18orf1;C18orf1;C18orf1;C18orf1                                                                                                                                                                                                                                                                                                                                                                                                                                                                                                                                                                                                                                                                                                                                                                                                                                                                                                                                                                                                                                                                                                                                                                                                                                                                                                                                                                                                                                                                                                                                                                                                                                                                                                                                                                                                                                                                                                                                                                                                                                                                                                                                                                                                                                                                                                                                                                                                                                                                                                                                                                                                                                                                                                                                                                                                                                                                                                                                                                                                                                                                                                                                                                                                                                                                                                                                                                                                                                                                                                                                                                                                                                                                                                                                                                                                                                                                                                                                                                                                                                                                                                                                                                                                                                                                                                                                                                                                                                                                                                                                                                                                                                                                                                                                                                                                                             | 0.00010769        | 0.000107691          | 4.34453            | 4.34453                      | T up vs N                              | 25.979  | 20.2096   | 12.4469    | 1         |
| cg24781973  | FMN1                                                                                                                                                                                                                                                                                                                                                                                                                                                                                                                                                                                                                                                                                                                                                                                                                                                                                                                                                                                                                                                                                                                                                                                                                                                                                                                                                                                                                                                                                                                                                                                                                                                                                                                                                                                                                                                                                                                                                                                                                                                                                                                                                                                                                                                                                                                                                                                                                                                                                                                                                                                                                                                                                                                                                                                                                                                                                                                                                                                                                                                                                                                                                                                                                                                                                                                                                                                                                                                                                                                                                                                                                                                                                                                                                                                                                                                                                                                                                                                                                                                                                                                                                                                                                                                                                                                                                                                                                                                                                                                                                                                                                                                                                                                                                                                                                                                                | 5.97E-05          | 5.97E-05             | 0.174078           | -5.74454                     | T down vs N                            | 29.092  | 28.6265   | 15.7438    | 1         |
| cg24787755  | HHEX                                                                                                                                                                                                                                                                                                                                                                                                                                                                                                                                                                                                                                                                                                                                                                                                                                                                                                                                                                                                                                                                                                                                                                                                                                                                                                                                                                                                                                                                                                                                                                                                                                                                                                                                                                                                                                                                                                                                                                                                                                                                                                                                                                                                                                                                                                                                                                                                                                                                                                                                                                                                                                                                                                                                                                                                                                                                                                                                                                                                                                                                                                                                                                                                                                                                                                                                                                                                                                                                                                                                                                                                                                                                                                                                                                                                                                                                                                                                                                                                                                                                                                                                                                                                                                                                                                                                                                                                                                                                                                                                                                                                                                                                                                                                                                                                                                                                | 0.0003022         | 0.0003022            | 0.236174           | -4.23417                     | T down vs N                            | 21.064  | 19.5077   | 14.8179    | 1         |
| cg24789138  | C15orf33                                                                                                                                                                                                                                                                                                                                                                                                                                                                                                                                                                                                                                                                                                                                                                                                                                                                                                                                                                                                                                                                                                                                                                                                                                                                                                                                                                                                                                                                                                                                                                                                                                                                                                                                                                                                                                                                                                                                                                                                                                                                                                                                                                                                                                                                                                                                                                                                                                                                                                                                                                                                                                                                                                                                                                                                                                                                                                                                                                                                                                                                                                                                                                                                                                                                                                                                                                                                                                                                                                                                                                                                                                                                                                                                                                                                                                                                                                                                                                                                                                                                                                                                                                                                                                                                                                                                                                                                                                                                                                                                                                                                                                                                                                                                                                                                                                                            | 3.21E-05          | 3.21E-05             | 0.27754            | -3.60308                     | T down vs N                            | 32.632  | 15.3885   | 7.54531    | 1         |
| cg24790764  | C12orf73                                                                                                                                                                                                                                                                                                                                                                                                                                                                                                                                                                                                                                                                                                                                                                                                                                                                                                                                                                                                                                                                                                                                                                                                                                                                                                                                                                                                                                                                                                                                                                                                                                                                                                                                                                                                                                                                                                                                                                                                                                                                                                                                                                                                                                                                                                                                                                                                                                                                                                                                                                                                                                                                                                                                                                                                                                                                                                                                                                                                                                                                                                                                                                                                                                                                                                                                                                                                                                                                                                                                                                                                                                                                                                                                                                                                                                                                                                                                                                                                                                                                                                                                                                                                                                                                                                                                                                                                                                                                                                                                                                                                                                                                                                                                                                                                                                                            | 7.17E-05          | 7.17E-05             | 0.309142           | -3.23476                     | T down vs N                            | 28.099  | 12.9081   | 7.34999    | 1         |
| cg24792113  | TMPRSS11E;TMPRSS11E                                                                                                                                                                                                                                                                                                                                                                                                                                                                                                                                                                                                                                                                                                                                                                                                                                                                                                                                                                                                                                                                                                                                                                                                                                                                                                                                                                                                                                                                                                                                                                                                                                                                                                                                                                                                                                                                                                                                                                                                                                                                                                                                                                                                                                                                                                                                                                                                                                                                                                                                                                                                                                                                                                                                                                                                                                                                                                                                                                                                                                                                                                                                                                                                                                                                                                                                                                                                                                                                                                                                                                                                                                                                                                                                                                                                                                                                                                                                                                                                                                                                                                                                                                                                                                                                                                                                                                                                                                                                                                                                                                                                                                                                                                                                                                                                                                                 | 8.15E-07          | 8.15E-07             | 0.1666             | -6.00242                     | T down vs N                            | 60.289  | 30.0827   | 7.98366    | 1         |
| cg24793124  | PRDM1;PRDM1                                                                                                                                                                                                                                                                                                                                                                                                                                                                                                                                                                                                                                                                                                                                                                                                                                                                                                                                                                                                                                                                                                                                                                                                                                                                                                                                                                                                                                                                                                                                                                                                                                                                                                                                                                                                                                                                                                                                                                                                                                                                                                                                                                                                                                                                                                                                                                                                                                                                                                                                                                                                                                                                                                                                                                                                                                                                                                                                                                                                                                                                                                                                                                                                                                                                                                                                                                                                                                                                                                                                                                                                                                                                                                                                                                                                                                                                                                                                                                                                                                                                                                                                                                                                                                                                                                                                                                                                                                                                                                                                                                                                                                                                                                                                                                                                                                                         | 8.42E-05          | 8.42E-05             | 0.19986            | -5.00349                     | T down vs N                            | 27.249  | 24.2821   | 14.2582    | 1         |
| cg24794433  | DAB2IP                                                                                                                                                                                                                                                                                                                                                                                                                                                                                                                                                                                                                                                                                                                                                                                                                                                                                                                                                                                                                                                                                                                                                                                                                                                                                                                                                                                                                                                                                                                                                                                                                                                                                                                                                                                                                                                                                                                                                                                                                                                                                                                                                                                                                                                                                                                                                                                                                                                                                                                                                                                                                                                                                                                                                                                                                                                                                                                                                                                                                                                                                                                                                                                                                                                                                                                                                                                                                                                                                                                                                                                                                                                                                                                                                                                                                                                                                                                                                                                                                                                                                                                                                                                                                                                                                                                                                                                                                                                                                                                                                                                                                                                                                                                                                                                                                                                              | 0.00038923        | 0.000389226          | 0.200965           | -4.976                       | T down vs N                            | 19.954  | 24.1162   | 19.3373    | 1         |
| cg24794992  | OTOA                                                                                                                                                                                                                                                                                                                                                                                                                                                                                                                                                                                                                                                                                                                                                                                                                                                                                                                                                                                                                                                                                                                                                                                                                                                                                                                                                                                                                                                                                                                                                                                                                                                                                                                                                                                                                                                                                                                                                                                                                                                                                                                                                                                                                                                                                                                                                                                                                                                                                                                                                                                                                                                                                                                                                                                                                                                                                                                                                                                                                                                                                                                                                                                                                                                                                                                                                                                                                                                                                                                                                                                                                                                                                                                                                                                                                                                                                                                                                                                                                                                                                                                                                                                                                                                                                                                                                                                                                                                                                                                                                                                                                                                                                                                                                                                                                                                                | 0.0001886         | 0.000188596          | 0.289649           | -3.45246                     | T down vs N                            | 23.23   | 14.3802   | 9.90472    | 1         |
| cg24796651  | SDAD1                                                                                                                                                                                                                                                                                                                                                                                                                                                                                                                                                                                                                                                                                                                                                                                                                                                                                                                                                                                                                                                                                                                                                                                                                                                                                                                                                                                                                                                                                                                                                                                                                                                                                                                                                                                                                                                                                                                                                                                                                                                                                                                                                                                                                                                                                                                                                                                                                                                                                                                                                                                                                                                                                                                                                                                                                                                                                                                                                                                                                                                                                                                                                                                                                                                                                                                                                                                                                                                                                                                                                                                                                                                                                                                                                                                                                                                                                                                                                                                                                                                                                                                                                                                                                                                                                                                                                                                                                                                                                                                                                                                                                                                                                                                                                                                                                                                               | 1.25E-05          | 1.25E-05             | 0.157689           | -6.3416                      | T down vs N                            | 38.579  | 31.9564   | 13.2532    | 1         |
| cg24796852  | GMFG                                                                                                                                                                                                                                                                                                                                                                                                                                                                                                                                                                                                                                                                                                                                                                                                                                                                                                                                                                                                                                                                                                                                                                                                                                                                                                                                                                                                                                                                                                                                                                                                                                                                                                                                                                                                                                                                                                                                                                                                                                                                                                                                                                                                                                                                                                                                                                                                                                                                                                                                                                                                                                                                                                                                                                                                                                                                                                                                                                                                                                                                                                                                                                                                                                                                                                                                                                                                                                                                                                                                                                                                                                                                                                                                                                                                                                                                                                                                                                                                                                                                                                                                                                                                                                                                                                                                                                                                                                                                                                                                                                                                                                                                                                                                                                                                                                                                | 1.41E-05          | 1.41E-05             | 0.286243           | -3.49353                     | T down vs N                            | 37.779  | 14.656    | 6.20708    | 1         |
| cg24797431  | CHRN83                                                                                                                                                                                                                                                                                                                                                                                                                                                                                                                                                                                                                                                                                                                                                                                                                                                                                                                                                                                                                                                                                                                                                                                                                                                                                                                                                                                                                                                                                                                                                                                                                                                                                                                                                                                                                                                                                                                                                                                                                                                                                                                                                                                                                                                                                                                                                                                                                                                                                                                                                                                                                                                                                                                                                                                                                                                                                                                                                                                                                                                                                                                                                                                                                                                                                                                                                                                                                                                                                                                                                                                                                                                                                                                                                                                                                                                                                                                                                                                                                                                                                                                                                                                                                                                                                                                                                                                                                                                                                                                                                                                                                                                                                                                                                                                                                                                              | 7.99E-05          | 7.99E-05             | 0.31774            | -3.14723                     | T down vs N                            | 27.523  | 12.312    | 7.15731    | 1         |
| cg24799921  | C10orf41;C10orf41                                                                                                                                                                                                                                                                                                                                                                                                                                                                                                                                                                                                                                                                                                                                                                                                                                                                                                                                                                                                                                                                                                                                                                                                                                                                                                                                                                                                                                                                                                                                                                                                                                                                                                                                                                                                                                                                                                                                                                                                                                                                                                                                                                                                                                                                                                                                                                                                                                                                                                                                                                                                                                                                                                                                                                                                                                                                                                                                                                                                                                                                                                                                                                                                                                                                                                                                                                                                                                                                                                                                                                                                                                                                                                                                                                                                                                                                                                                                                                                                                                                                                                                                                                                                                                                                                                                                                                                                                                                                                                                                                                                                                                                                                                                                                                                                                                                   | 0.00056331        | 0.000563311          | 66.6555            | 66.6555                      | T up vs N                              | 18.985  | 155.466   | 122.837    | 1         |
| cg24801023  | MTMR6                                                                                                                                                                                                                                                                                                                                                                                                                                                                                                                                                                                                                                                                                                                                                                                                                                                                                                                                                                                                                                                                                                                                                                                                                                                                                                                                                                                                                                                                                                                                                                                                                                                                                                                                                                                                                                                                                                                                                                                                                                                                                                                                                                                                                                                                                                                                                                                                                                                                                                                                                                                                                                                                                                                                                                                                                                                                                                                                                                                                                                                                                                                                                                                                                                                                                                                                                                                                                                                                                                                                                                                                                                                                                                                                                                                                                                                                                                                                                                                                                                                                                                                                                                                                                                                                                                                                                                                                                                                                                                                                                                                                                                                                                                                                                                                                                                                               | 4.93E-05          | 4.93E-05             | 0.257477           | -3.88384                     | T down vs N                            | 30.15   | 17.2429   | 9.1505     | 1         |
| cg24802193  | XAGE1B;XAGE1E;XAGE1C;XAGE1E;XAGE1A;XAGE1D;XAGE1D;XAGE1D;XAGE1D;XAGE1C;XAGE1A;XAGE1B;XAGE1D;XAGE1D;XAGE1D;XAGE1D;XAGE1C;XAGE1A;XAGE1B;XAGE1D;XAGE1D;XAGE1D;XAGE1D;XAGE1C;XAGE1A;XAGE1B;XAGE1D;XAGE1D;XAGE1D;XAGE1D;XAGE1C;XAGE1A;XAGE1B;XAGE1D;XAGE1D;XAGE1D;XAGE1D;XAGE1C;XAGE1A;XAGE1B;XAGE1D;XAGE1D;XAGE1D;XAGE1D;XAGE1C;XAGE1A;XAGE1B;XAGE1D;XAGE1D;XAGE1D;XAGE1D;XAGE1C;XAGE1A;XAGE1B;XAGE1D;XAGE1D;XAGE1D;XAGE1D;XAGE1C;XAGE1A;XAGE1B;XAGE1D;XAGE1D;XAGE1D;XAGE1D;XAGE1C;XAGE1A;XAGE1B;XAGE1D;XAGE1D;XAGE1D;XAGE1D;XAGE1C;XAGE1A;XAGE1B;XAGE1D;XAGE1D;XAGE1D;XAGE1D;XAGE1C;XAGE1A;XAGE1B;XAGE1D;XAGE1D;XAGE1D;XAGE1D;XAGE1C;XAGE1A;XAGE1B;XAGE1D;XAGE1D;XAGE1D;XAGE1D;XAGE1C;XAGE1A;XAGE1B;XAGE1D;XAGE1D;XAGE1D;XAGE1D;XAGE1C;XAGE1A;XAGE1B;XAGE1D;XAGE1D;XAGE1D;XAGE1D;XAGE1C;XAGE1A;XAGE1B;XAGE1D;XAGE1D;XAGE1D;XAGE1D;XAGE1C;XAGE1A;XAGE1B;XAGE1D;XAGE1D;XAGE1D;XAGE1D;XAGE1C;XAGE1A;XAGE1B;XAGE1D;XAGE1D;XAGE1D;XAGE1D;XAGE1C;XAGE1A;XAGE1B;XAGE1D;XAGE1D;XAGE1D;XAGE1D;XAGE1C;XAGE1A;XAGE1B;XAGE1D;XAGE1D;XAGE1D;XAGE1D;XAGE1C;XAGE1A;XAGE1B;XAGE1D;XAGE1D;XAGE1D;XAGE1D;XAGE1C;XAGE1A;XAGE1B;XAGE1D;XAGE1D;XAGE1D;XAGE1D;XAGE1C;XAGE1A;XAGE1B;XAGE1D;XAGE1D;XAGE1D;XAGE1D;XAGE1C;XAGE1A;XAGE1B;XAGE1D;XAGE1D;XAGE1D;XAGE1D;XAGE1C;XAGE1A;XAGE1B;XAGE1D;XAGE1D;XAGE1D;XAGE1D;XAGE1C;XAGE1A;XAGE1B;XAGE1D;XAGE1D;XAGE1D;XAGE1D;XAGE1C;XAGE1A;XAGE1B;XAGE1D;XAGE1D;XAGE1D;XAGE1D;XAGE1C;XAGE1A;XAGE1B;XAGE1D;XAGE1D;XAGE1D;XAGE1D;XAGE1C;XAGE1A;XAGE1B;XAGE1D;XAGE1D;XAGE1D;XAGE1D;XAGE1C;XAGE1A;XAGE1B;XAGE1D;XAGE1D;XAGE1D;XAGE1D;XAGE1C;XAGE1A;XAGE1B;XAGE1D;XAGE1D;XAGE1D;XAGE1D;XAGE1C;XAGE1A;XAGE1B;XAGE1D;XAGE1D;XAGE1D;XAGE1D;XAGE1C;XAGE1A;XAGE1B;XAGE1D;XAGE1D;XAGE1D;XAGE1D;XAGE1C;XAGE1A;XAGE1B;XAGE1D;XAGE1D;XAGE1D;XAGE1D;XAGE1C;XAGE1A;XAGE1B;XAGE1D;XAGE1D;XAGE1D;XAGE1D;XAGE1C;XAGE1A;XAGE1B;XAGE1D;XAGE1D;XAGE1D;XAGE1D;XAGE1C;XAGE1A;XAGE1B;XAGE1D;XAGE1D;XAGE1D;XAGE1D;XAGE1C;XAGE1A;XAGE1B;XAGE1D;XAGE1D;XAGE1D;XAGE1D;XAGE1C;XAGE1A;XAGE1B;XAGE1D;XAGE1D;XAGE1D;XAGE1D;XAGE1C;XAGE1A;XAGE1B;XAGE1D;XAGE1D;XAGE1D;XAGE1D;XAGE1C;XAGE1A;XAGE1B;XAGE1D;XAGE1D;XAGE1D;XAGE1D;XAGE1C;XAGE1A;XAGE1B;XAGE1D;XAGE1D;XAGE1D;XAGE1D;XAGE1C;XAGE1A;XAGE1B;XAGE1D;XAGE1D;XAGE1D;XAGE1D;XAGE1C;XAGE1A;XAGE1B;XAGE1D;XAGE1D;XAGE1D;XAGE1D;XAGE1C;XAGE1A;XAGE1B;XAGE1D;XAGE1D;XAGE1D;XAGE1D;XAGE1C;XAGE1A;XAGE1B;XAGE1D;XAGE1D;XAGE1D;XAGE1D;XAGE1C;XAGE1A;XAGE1B;XAGE1D;XAGE1D;XAGE1D;XAGE1D;XAGE1C;XAGE1A;XAGE1B;XAGE1D;XAGE1D;XAGE1D;XAGE1D;XAGE1C;XAGE1A;XAGE1B;XAGE1D;XAGE1D;XAGE1D;XAGE1D;XAGE1C;XAGE1A;XAGE1B;XAGE1D;XAGE1D;XAGE1D;XAGE1D;XAGE1C;XAGE1A;XAGE1B;XAGE1D;XAGE1D;XAGE1D;XAGE1D;XAGE1C;XAGE1A;XAGE1B;XAGE1D;XAGE1D;XAGE1D;XAGE1D;XAGE1C;XAGE1A;XAGE1B;XAGE1D;XAGE1D;XAGE1D;XAGE1D;XAGE1C;XAGE1A;XAGE1B;XAGE1D;XAGE1D;XAGE1D;XAGE1D;XAGE1C;XAGE1A;XAGE1B;XAGE1D;XAGE1D;XAGE1D;XAGE1D;XAGE1C;XAGE1A;XAGE1B;XAGE1D;XAGE1D;XAGE1D;XAGE1D;XAGE1C;XAGE1A;XAGE1B;XAGE1D;XAGE1D;XAGE1D;XAGE1D;XAGE1C;XAGE1A;XAGE1B;XAGE1D;XAGE1D;XAGE1D;XAGE1D;XAGE1C;XAGE1A;XAGE1B;XAGE1D;XAGE1D;XAGE1D;XAGE1D;XAGE1C;XAGE1A;XAGE1B;XAGE1D;XAGE1D;XAGE1D;XAGE1D;XAGE1C;XAGE1A;XAGE1B;XAGE1D;XAGE1D;XAGE1D;XAGE1D;XAGE1C;XAGE1A;XAGE1B;XAGE1D;XAGE1D;XAGE1D;XAGE1D;XAGE1C;XAGE1A;XAGE1B;XAGE1D;XAGE1D;XAGE1D;XAGE1D;XAGE1C;XAGE1A;XAGE1B;XAGE1D;XAGE1D;XAGE1D;XAGE1D;XAGE1C;XAGE1A;XAGE1B;XAGE1D;XAGE1D;XAGE1D;XAGE1D;XAGE1C;XAGE1A;XAGE1B;XAGE1D;XAGE1D;XAGE1D;XAGE1D;XAGE1C;XAGE1A;XAGE1B;XAGE1D;XAGE1D;XAGE1D;XAGE1D;XAGE1C;XAGE1A;XAGE1B;XAGE1D;XAGE1D;XAGE1D;XAGE1D;XAGE1C;XAGE1A;XAGE1B;XAGE1D;XAGE1D;XAGE1D;XAGE1D;XAGE1C;XAGE1A;XAGE1B;XAGE1D;XAGE1D;XAGE1D;XAGE1D;XAGE1C;XAGE1A;XAGE1B;XAGE1D;XAGE1D;XAGE1D;XAGE1D;XAGE1C;XAGE1A;XAGE1B;XAGE1D;XAGE1D;XAGE1D;XAGE1D;XAGE1C;XAGE1A;XAGE1B;XAGE1D;XAGE1D;XAGE1D;XAGE1D;XAGE1C;XAGE1A;XAGE1B;XAGE1D;XAGE1D;XAGE1D;XAGE1D;XAGE1C;XAGE1A;XAGE1B;XAGE1D;XAGE1D;XAGE1D;XAGE1D;XAGE1C;XAGE1A;XAGE1B;XAGE1D;XAGE1D;XAGE1D;XAGE1D;XAGE1C;XAGE1A;XAGE1B;XAGE1D;XAGE1D;XAGE1D;XAGE1D;XAGE1C;XAGE1A;XAGE1B;XAGE1D;XAGE1D;XAGE1D;XAGE1D;XAGE1C;XAGE1A;XAGE1B;XAGE1D;XAGE1D;XAGE1D;XAGE1D;XAGE1C;XAGE1A;XAGE1B;XAGE1D;XAGE1D;XAGE1D;XAGE1D;XAGE1C;XAGE1A;XAGE1B;XAGE1D;XAGE1D;XAGE1D;XAGE1D;XAGE1C;XAGE1A;XAGE1B;XAGE1D;XAGE1D;XAGE1D;XAGE1D;XAGE1C;XAGE1A;XAGE1B;XAGE1D;XAGE1D;XAGE1D;XAGE1D;XAGE1C;XAGE1A;XAGE1B;XAGE1D;XAGE1D;XAGE1D;XAGE1D;XAGE1C;XAGE1A;XAGE1B;XAGE1D;XAGE1D;XAGE1D;XAGE1D;XAGE1C;XAGE1A;XAGE1B;XAGE1D;XAGE1D;XAGE1D;XAGE1D;XAGE1C;XAGE1A;XAGE1B;XAGE1D;XAGE1D;XAGE1D;XAGE1D;XAGE1C;XAGE1A;XAGE1B;XAGE1D;XAGE1D;XAGE1D;XAGE1D;XAGE1C;XAGE1A;XAGE1B;XAGE1D;XAGE1D;XAGE1D;XAGE1D;XAGE1C;XAGE1A;XAGE1B;XAGE1D;XAGE1D;XAGE1D;XAGE1D;XAGE1C;XAGE1A;XAGE1B;XAGE1D;XAGE1D;XAGE1D;XAGE1D;XAGE1C;XAGE1A;XAGE1B;XAGE1D;XAGE1D;XAGE1D;XAGE1D;XAGE1C;XAGE1A;XAGE1B;XAGE1D;XAGE1D;XAGE1D;XAGE1D;XAGE1C;XAGE1A;XAGE1B;XAGE1D;XAGE1D;XAGE1D;XAGE1D;XAGE1C;XAGE1A;XAGE1B;XAGE1D;XAGE1D;XAGE1D;XAGE1D;XAGE1C |                   |                      |                    |                              |                                        |         |           |            |           |

| Probeset ID                        | UCSC_REFGENE_NAME               | p-value<br>(Type) | p-value (T vs.<br>N) | Ratio (T<br>vs. N) | Fold-<br>Change (T<br>vs. N) | Fold-Change (T vs.<br>N) (Description) | F(Type) | SS (Type) | SS (Error) | F (Error) |
|------------------------------------|---------------------------------|-------------------|----------------------|--------------------|------------------------------|----------------------------------------|---------|-----------|------------|-----------|
| cg24808442                         | RAB4A;SPHAR                     | 0.00185242        | 0.00185242           | 0.288922           | -3.46114                     | T down vs N                            | 13.857  | 14.4385   | 16.6719    | 1         |
| cg24809544                         | CD33;CD33                       | 0.00117048        | 0.00117048           | 0.270827           | -3.6924                      | T down vs N                            | 15.962  | 15.0419   | 14.135     | 1         |
| cg24816298                         | PTH                             | 1.41E-05          | 1.41E-05             | 0.237479           | -4.2109                      | T down vs N                            | 37.763  | 19.3591   | 8.20232    | 1         |
| cg24816460                         | CDYL;CDYL                       | 8.07E-07          | 8.07E-07             | 18.1659            | 18.1659                      | T up vs N                              | 60.384  | 78.7447   | 20.8649    | 1         |
| cg24818562                         | C6orf47                         | 2.09E-05          | 2.09E-05             | 0.302255           | -3.30847                     | T down vs N                            | 35.241  | 13.4084   | 6.08758    | 1         |
| cg24822053                         | GDF1;LASS1                      | 0.00019281        | 0.000192813          | 6.51732            | 6.51732                      | T up vs N                              | 23.125  | 32.9091   | 22.7694    | 1         |
| CACNB2;CACNB2;CACNB2;CACNB2;CA     |                                 |                   |                      |                    |                              |                                        |         |           |            |           |
| cg24825767                         | CNB2;CACNB2                     | 5.07E-06          | 5.07E-06             | 0.158904           | -6.29313                     | T down vs N                            | 44.936  | 31.6914   | 11.2841    | 1         |
| cg24831051                         | MEF2C;MEF2C                     | 1.67E-05          | 1.67E-05             | 8.44166            | 8.44166                      | T up vs N                              | 36.676  | 42.6203   | 18.5933    | 1         |
| cg24831427                         | COQ3                            | 0.00081128        | 0.000811284          | 0.309479           | -3.23124                     | T down vs N                            | 16.93   | 12.8842   | 12.1763    | 1         |
| cg24832498                         | UBQLN3                          | 4.39E-07          | 4.39E-07             | 0.166885           | -5.99214                     | T down vs N                            | 66.331  | 30.0252   | 7.24255    | 1         |
| cg24832908                         | OR1S1                           | 0.00019425        | 0.000194248          | 0.212323           | -4.7098                      | T down vs N                            | 23.09   | 22.4919   | 15.5854    | 1         |
| cg24833065                         | PTPRH;PTPRH                     | 0.0017708         | 0.0017708            | 0.266726           | -3.74917                     | T down vs N                            | 14.016  | 16.3575   | 18.673     | 1         |
| cg24833981                         | FCRL6                           | 0.00117901        | 0.00117901           | 0.276975           | -3.61043                     | T down vs N                            | 15.498  | 15.4374   | 15.9378    | 1         |
| cg24834199                         | LBR;LBR                         | 2.10E-06          | 2.10E-06             | 0.280386           | -3.56651                     | T down vs N                            | 51.918  | 15.1444   | 4.66717    | 1         |
| cg24835233                         | PAGE3                           | 0.00179341        | 0.00179341           | 0.228378           | -4.37871                     | T down vs N                            | 13.971  | 20.4257   | 23.3921    | 1         |
| cg24838240                         | CLEC17A                         | 9.97E-06          | 9.97E-06             | 0.191157           | -5.23129                     | T down vs N                            | 40.09   | 25.6435   | 10.2345    | 1         |
| cg24838349                         | KIR2DL4;KIR2DL4;KIR2DL4         | 8.81E-06          | 8.81E-06             | 0.210322           | -4.75462                     | T down vs N                            | 40.943  | 22.7677   | 8.8974     | 1         |
| cg24840062                         | CDCP1;CDCP1                     | 1.92E-06          | 1.92E-06             | 0.131589           | -7.59941                     | T down vs N                            | 52.653  | 38.5237   | 11.7066    | 1         |
| cg24840300                         | LPPR3                           | 0.00074974        | 0.000749743          | 5.09842            | 5.09842                      | T up vs N                              | 17.241  | 24.8523   | 23.0628    | 1         |
| cg24841318                         | PROCA1;PROCA1                   | 4.67E-05          | 4.67E-05             | 6.0188             | 6.0188                       | T up vs N                              | 30.455  | 30.1742   | 15.8526    | 1         |
| cg24842260                         | C10orf41;C10orf41               | 6.66E-06          | 6.66E-06             | 42.1866            | 42.1866                      | T up vs N                              | 42.933  | 131.158   | 48.8789    | 1         |
|                                    |                                 |                   |                      |                    |                              |                                        |         |           |            |           |
| cg24843413                         | SLC13A2;SLC13A2;SLC13A2;SLC13A2 | 0.00036598        | 0.000365983          | 0.232169           | -4.3072                      | T down vs N                            | 20.221  | 19.9728   | 15.8037    | 1         |
| cg24843443                         | DDX60L                          | 0.00244225        | 0.00244225           | 0.192344           | -5.19903                     | T down vs N                            | 12.9    | 25.4521   | 31.5698    | 1         |
| cg24843609                         | BGLAP                           | 0.00055989        | 0.000559891          | 0.189077           | -5.28885                     | T down vs N                            | 18.422  | 25.9839   | 22.5683    | 1         |
| cg24845595                         | NTRK1;INSRR                     | 1.69E-05          | 1.69E-05             | 6.12352            | 6.12352                      | T up vs N                              | 36.599  | 30.757    | 13.4459    | 1         |
| cg24846343                         | DDTL                            | 0.00169179        | 0.00169179           | 0.328162           | -3.04727                     | T down vs N                            | 14.178  | 11.6285   | 13.1225    | 1         |
| cg24846373                         | TTL7                            | 0.00114654        | 0.00114654           | 3.74002            | 3.74002                      | T up vs N                              | 15.602  | 16.2971   | 16.7125    | 1         |
| cg24847259                         | HLA-L                           | 8.60E-05          | 8.60E-05             | 4.02479            | 4.02479                      | T up vs N                              | 27.14   | 18.1608   | 10.7063    | 1         |
| cg24847757                         | TRIM71                          | 0.00463274        | 0.00463274           | 0.30126            | -3.31939                     | T down vs N                            | 10.813  | 13.4824   | 19.9509    | 1         |
| cg24848787                         | LIPC                            | 0.00068049        | 0.000680488          | 0.324767           | -3.07913                     | T down vs N                            | 17.628  | 11.8466   | 10.7524    | 1         |
| cg24849439                         | MYRIP                           | 0.00502183        | 0.00502183           | 5.24007            | 5.24007                      | T up vs N                              | 10.562  | 25.6956   | 38.9253    | 1         |
| cg24849517                         | CYP11A1                         | 0.00073255        | 0.000732553          | 0.220827           | -4.52844                     | T down vs N                            | 17.334  | 21.3665   | 19.7226    | 1         |
| cg24851181                         | C3orf72                         | 2.17E-09          | 2.17E-09             | 0.17248            | -5.79776                     | T down vs N                            | 142.91  | 28.9293   | 3.2388     | 1         |
| cg24851854                         | TACSTD2                         | 9.69E-06          | 9.69E-06             | 21.9338            | 21.9338                      | T up vs N                              | 40.284  | 89.315    | 35.474     | 1         |
| cg24852561                         | CLYBL                           | 0.00446219        | 0.00446219           | 0.168972           | -5.91815                     | T down vs N                            | 10.93   | 29.6099   | 43.3453    | 1         |
| cg24854435                         | LOC388692                       | 0.00120319        | 0.00120319           | 3.1421             | 3.1421                       | T up vs N                              | 15.422  | 12.2769   | 12.7372    | 1         |
| cg24855045                         | NSUN6                           | 1.53E-06          | 1.53E-06             | 0.228441           | -4.3775                      | T down vs N                            | 54.614  | 20.4181   | 5.98177    | 1         |
| cg24857560                         | CYP2C19                         | 0.00032731        | 0.000327312          | 0.263463           | -3.7956                      | T down vs N                            | 20.71   | 16.6637   | 12.8739    | 1         |
| cg24859722                         | RASSF1;RASSF1                   | 0.00081981        | 0.000819814          | 3.14607            | 3.14607                      | T up vs N                              | 16.889  | 12.304    | 11.6563    | 1         |
| TCF7L2;TCF7L2;TCF7L2;TCF7L2;TCF7L2 |                                 |                   |                      |                    |                              |                                        |         |           |            |           |
| cg24861253                         | ;TCF7L2                         | 0.00012701        | 0.000127013          | 0.203051           | -4.92488                     | T down vs N                            | 25.149  | 23.8068   | 15.1464    | 1         |
| cg24861686                         | BLK                             | 7.69E-05          | 7.69E-05             | 0.171255           | -5.83926                     | T down vs N                            | 27.724  | 29.1646   | 16.8312    | 1         |
| cg24862202                         | RBM19;RBM19;RBM19               | 0.00019617        | 0.000196174          | 0.257442           | -3.88436                     | T down vs N                            | 23.044  | 17.2463   | 11.9747    | 1         |
| cg24864413                         | SLC22A1;SLC22A1                 | 0.00040785        | 0.000407853          | 0.313118           | -3.19369                     | T down vs N                            | 19.753  | 12.6287   | 10.2292    | 1         |
| cg24865110                         | YPEL2                           | 0.00025792        | 0.00025792           | 3.08101            | 3.08101                      | T up vs N                              | 21.777  | 11.8595   | 8.71332    | 1         |
| cg24865210                         | UBLCP1                          | 0.0001758         | 0.000175803          | 0.243374           | -4.1089                      | T down vs N                            | 23.564  | 18.7043   | 12.7005    | 1         |
| cg24866363                         | MSH3                            | 0.00058941        | 0.000589414          | 0.277104           | -3.60876                     | T down vs N                            | 18.788  | 14.5188   | 11.5914    | 1         |
| cg24867653                         | SLC22A13                        | 7.63E-05          | 7.63E-05             | 0.332649           | -3.00618                     | T down vs N                            | 27.768  | 11.3468   | 6.53798    | 1         |
| cg24870096                         | PROP1                           | 0.00112401        | 0.00112401           | 0.246271           | -4.06057                     | T down vs N                            | 15.677  | 18.3924   | 18.7715    | 1         |
| cg24870391                         | CCL11                           | 0.00196316        | 0.00196316           | 0.313086           | -3.19401                     | T down vs N                            | 13.653  | 12.6308   | 14.8024    | 1         |
| cg24871540                         | MYH14;MYH14;MYH14               | 0.00043081        | 0.000430813          | 5.07509            | 5.07509                      | T up vs N                              | 19.519  | 24.7126   | 20.2572    | 1         |
| cg24872117                         | DMRTC2                          | 0.00035941        | 0.000359406          | 0.290355           | -3.44406                     | T down vs N                            | 20.3    | 14.3237   | 11.2897    | 1         |
| cg24872384                         | KRTAP4-3;KRTAP4-3               | 0.00034185        | 0.000341849          | 0.196047           | -5.10082                     | T down vs N                            | 20.519  | 24.8667   | 19.3903    | 1         |
| cg24873592                         | TINAGL1;TINAGL1                 | 0.00039195        | 0.000391947          | 6.88815            | 6.88815                      | T up vs N                              | 19.924  | 34.8808   | 28.011     | 1         |
| cg24874254                         | PRDM1;PRDM1                     | 1.20E-07          | 1.20E-07             | 0.189972           | -5.26392                     | T down vs N                            | 80.684  | 25.8366   | 5.1235     | 1         |
| cg24876897                         | DDOST                           | 8.82E-06          | 8.82E-06             | 0.237638           | -4.20809                     | T down vs N                            | 40.936  | 19.341    | 7.55961    | 1         |
| cg24877449                         | MIR502;CLCN5;CLCN5              | 9.01E-06          | 9.01E-06             | 0.234584           | -4.26287                     | T down vs N                            | 40.791  | 19.6908   | 7.72351    | 1         |
| cg24878478                         | DOCK6                           | 0.00035574        | 0.000355738          | 0.30669            | -3.26063                     | T down vs N                            | 20.345  | 13.0839   | 10.2898    | 1         |
| cg24880701                         | LBXCOR1                         | 2.81E-05          | 2.81E-05             | 29.1012            | 29.1012                      | T up vs N                              | 33.42   | 106.42    | 50.949     | 1         |
| cg24880818                         | MIR190B                         | 8.96E-07          | 8.96E-07             | 0.205389           | -4.86882                     | T down vs N                            | 59.404  | 23.4661   | 6.32042    | 1         |
| cg24881910                         | FCRL3                           | 4.58E-06          | 4.58E-06             | 0.198866           | -5.02851                     | T down vs N                            | 45.693  | 24.4328   | 8.55542    | 1         |
| cg24882714                         | VWA2                            | 0.00106449        | 0.00106449           | 0.268057           | -3.73055                     | T down vs N                            | 15.882  | 16.2345   | 16.3547    | 1         |
| cg24884084                         | SPRR1B                          | 0.00014667        | 0.000146672          | 0.2105             | -4.7506                      | T down vs N                            | 24.439  | 22.743    | 14.8898    | 1         |
| cg24886414                         | ZNF600                          | 0.00080986        | 0.000809862          | 3.68027            | 3.68027                      | T up vs N                              | 16.937  | 15.9016   | 15.0219    | 1         |
| cg24889021                         | ETV7;ETV7                       | 4.99E-06          | 4.99E-06             | 7.71136            | 7.71136                      | T up vs N                              | 45.054  | 39.0812   | 13.879     | 1         |
| cg24891133                         | C13orf33;C13orf33               | 1.71E-05          | 1.71E-05             | 14.7382            | 14.7382                      | T up vs N                              | 36.519  | 67.7969   | 29.7041    | 1         |
| cg24891312                         | PRB2                            | 4.59E-07          | 4.59E-07             | 0.168544           | -5.93317                     | T down vs N                            | 65.898  | 29.6943   | 7.20978    | 1         |
| cg24891846                         | CACNA1A;CACNA1A                 | 0.00011727        | 0.000117272          | 0.30225            | -3.30852                     | T down vs N                            | 25.548  | 13.4088   | 8.39764    | 1         |
| cg24892628                         | ADAMTSL5                        | 8.79E-05          | 8.79E-05             | 0.219621           | -4.5533                      | T down vs N                            | 27.022  | 21.5216   | 12.7432    | 1         |

| Probeset ID                                                     | UCSC_REFGENE_NAME             | p-value<br>(Type) | p-value (T vs.<br>N) | Ratio (T<br>vs. N) | Fold-<br>Change (T<br>vs. N) | Fold-Change (T vs.<br>N) (Description) | F(Type) | SS (Type) | SS (Error) | F (Error) |
|-----------------------------------------------------------------|-------------------------------|-------------------|----------------------|--------------------|------------------------------|----------------------------------------|---------|-----------|------------|-----------|
| DMKN;DMKN;DMKN;DMKN;DMKN;D                                      |                               |                   |                      |                    |                              |                                        |         |           |            |           |
| cg24892948                                                      | MKN                           | 3.76E-06          | 3.76E-06             | 0.125436           | -7.97218                     | T down vs N                            | 47.203  | 40.3644   | 13.6819    | 1         |
| cg24895871                                                      | HOTAIR                        | 5.94E-08          | 5.94E-08             | 0.184788           | -5.41162                     | T down vs N                            | 89.434  | 26.7048   | 4.77754    | 1         |
| cg24896460                                                      | RGNEF                         | 2.00E-05          | 2.00E-05             | 0.236066           | -4.23611                     | T down vs N                            | 35.503  | 19.5201   | 8.79705    | 1         |
| cg24898738                                                      | GPR123                        | 0.00093792        | 0.00093792           | 3.68796            | 3.68796                      | T up vs N                              | 16.366  | 15.9526   | 15.5957    | 1         |
| cg24898863                                                      | S100A8                        | 0.0009527         | 0.000952696          | 0.311848           | -3.20669                     | T down vs N                            | 16.306  | 12.7172   | 12.4786    | 1         |
| cg24899081                                                      | NKPD1                         | 0.00073902        | 0.000739021          | 0.276491           | -3.61675                     | T down vs N                            | 17.299  | 15.4795   | 14.3175    | 1         |
| cg24900666                                                      | HOXB1                         | 4.82E-05          | 4.82E-05             | 11.9194            | 11.9194                      | T up vs N                              | 30.281  | 57.5207   | 30.3927    | 1         |
| cg24904739                                                      | TBC1D16                       | 0.00044544        | 0.000445443          | 0.306725           | -3.26024                     | T down vs N                            | 19.377  | 13.0813   | 10.8015    | 1         |
| cg24908197                                                      | BTN1                          | 0.00189586        | 0.00189586           | 0.316385           | -3.1607                      | T down vs N                            | 14.13   | 11.6742   | 12.3932    | 1         |
| cg24909660                                                      | NR1H3                         | 9.26E-05          | 9.26E-05             | 0.300068           | -3.33258                     | T down vs N                            | 26.755  | 13.5716   | 8.11624    | 1         |
| cg24910112                                                      | GPR124                        | 0.00087642        | 0.000876423          | 3.23474            | 3.23474                      | T up vs N                              | 16.629  | 12.908    | 12.4201    | 1         |
| cg24910675                                                      | ENG;ENG;ENG;ENG               | 3.10E-05          | 3.10E-05             | 0.195615           | -5.11209                     | T down vs N                            | 32.838  | 24.9341   | 12.149     | 1         |
| cg24911364                                                      | BTNL2                         | 2.08E-06          | 2.08E-06             | 0.178685           | -5.59645                     | T down vs N                            | 51.981  | 27.7776   | 8.55008    | 1         |
| cg24912415                                                      | MYH7B                         | 2.71E-06          | 2.71E-06             | 7.80814            | 7.80814                      | T up vs N                              | 49.805  | 39.5599   | 12.7089    | 1         |
| cg24913868                                                      | NKX2-3                        | 0.00045627        | 0.000456269          | 0.256402           | -3.90012                     | T down vs N                            | 19.275  | 17.3493   | 14.4012    | 1         |
| cg24921089                                                      | AMPD3                         | 0.00227663        | 0.00227663           | 3.83129            | 3.83129                      | T up vs N                              | 13.139  | 16.8984   | 20.5774    | 1         |
| cg24923818                                                      | PKN1;PKN1                     | 0.00026066        | 0.000260664          | 0.110687           | -9.03448                     | T down vs N                            | 21.729  | 45.3754   | 33.4117    | 1         |
| cg24923953                                                      | NPFFR2;NPFFR2;NPFFR2          | 1.16E-05          | 1.16E-05             | 0.119496           | -8.3685                      | T down vs N                            | 39.058  | 42.2732   | 17.3171    | 1         |
| cg24924358                                                      | LCK;LCK                       | 0.00014493        | 0.000144934          | 0.301899           | -3.31237                     | T down vs N                            | 24.497  | 13.4348   | 8.77478    | 1         |
| cg24927800                                                      | DES                           | 0.00028517        | 0.000285169          | 10.8158            | 10.8158                      | T up vs N                              | 21.323  | 53.0986   | 39.8425    | 1         |
| FLJ35220;LOC100294362;FLJ35220;FLJ35220                         |                               |                   |                      |                    |                              |                                        |         |           |            |           |
| cg24927852                                                      | J35220                        | 1.31E-05          | 1.31E-05             | 0.245966           | -4.06561                     | T down vs N                            | 38.236  | 18.4249   | 7.70994    | 1         |
| cg24928023                                                      | AGPAT3;AGPAT3                 | 0.00282275        | 0.00282275           | 3.67255            | 3.67255                      | T up vs N                              | 12.412  | 15.8504   | 20.4326    | 1         |
| cg24929264                                                      | CCL15;CCL14-CCL15;CCL14-CCL15 | 3.37E-06          | 3.37E-06             | 0.251924           | -3.96945                     | T down vs N                            | 48.06   | 17.8014   | 5.92639    | 1         |
| cg24931138                                                      | TERT;TERT                     | 4.96E-06          | 4.96E-06             | 0.085001           | -11.7645                     | T down vs N                            | 45.096  | 56.915    | 20.1936    | 1         |
| cg24932457                                                      | TNR                           | 2.19E-06          | 2.19E-06             | 31.8847            | 31.8847                      | T up vs N                              | 51.563  | 112.266   | 34.8361    | 1         |
| cg24932662                                                      | FOXH1                         | 0.00357958        | 0.00357958           | 8.6197             | 8.6197                       | T up vs N                              | 11.632  | 43.4584   | 59.7784    | 1         |
| cg24935217                                                      | ELF5;ELF5                     | 0.00223931        | 0.00223931           | 0.306645           | -3.2611                      | T down vs N                            | 13.196  | 13.0871   | 15.8678    | 1         |
| cg24936095                                                      | LIMS1                         | 5.22E-06          | 5.22E-06             | 0.215256           | -4.64562                     | T down vs N                            | 44.724  | 22.0954   | 7.90468    | 1         |
| cg24936299                                                      | DAPL1                         | 3.34E-06          | 3.34E-06             | 0.214279           | -4.66682                     | T down vs N                            | 48.127  | 22.2266   | 7.38927    | 1         |
| cg24936695                                                      | CLDN17                        | 0.00134334        | 0.00134334           | 0.293528           | -3.40683                     | T down vs N                            | 15.014  | 14.0731   | 14.9975    | 1         |
| cg24940155                                                      | GPC6                          | 0.00010591        | 0.00010591           | 4.59079            | 4.59079                      | T up vs N                              | 26.063  | 21.7551   | 13.3552    | 1         |
| cg24942416                                                      | VSIG2                         | 0.00161991        | 0.00161991           | 4.28717            | 4.28717                      | T up vs N                              | 14.334  | 19.8455   | 22.1525    | 1         |
| cg24942919                                                      | EDNRB;EDNRB;EDNRB             | 0.00023521        | 0.000235212          | 0.29648            | -3.37291                     | T down vs N                            | 22.199  | 13.8442   | 9.97833    | 1         |
| cg24944820                                                      | BEST1;BEST1                   | 3.86E-05          | 3.86E-05             | 4.8208             | 4.8208                       | T up vs N                              | 31.546  | 23.1732   | 11.7534    | 1         |
| cg24947024                                                      | RNF8;RNF8                     | 1.30E-05          | 1.30E-05             | 0.276534           | -3.61619                     | T down vs N                            | 38.297  | 15.4758   | 6.46559    | 1         |
| cg24947371                                                      | GPR133                        | 0.00668507        | 0.00668507           | 3.19862            | 3.19862                      | T up vs N                              | 9.6952  | 12.6623   | 20.8966    | 1         |
| cg24947451                                                      | PDIA3P                        | 0.00073255        | 0.000732551          | 3.1665             | 3.1665                       | T up vs N                              | 17.334  | 12.4434   | 11.486     | 1         |
| cg24947777                                                      | FOXH1                         | 0.00039479        | 0.000394793          | 4.75303            | 4.75303                      | T up vs N                              | 19.893  | 22.7579   | 18.3043    | 1         |
| cg24947985                                                      | ZNF624                        | 6.54E-06          | 6.54E-06             | 0.202209           | -4.94539                     | T down vs N                            | 43.057  | 23.9311   | 8.89279    | 1         |
| cg24948406                                                      | HOXB1;HOXB1                   | 1.57E-05          | 1.57E-05             | 7.69269            | 7.69269                      | T up vs N                              | 37.049  | 38.9885   | 16.8378    | 1         |
| cg24949579                                                      | OR56A4                        | 2.86E-06          | 2.86E-06             | 0.127105           | -7.86754                     | T down vs N                            | 49.362  | 39.8522   | 12.9175    | 1         |
| cg24949632                                                      | GABRB1                        | 0.00290734        | 0.00290734           | 0.306362           | -3.26411                     | T down vs N                            | 12.314  | 13.1076   | 17.0317    | 1         |
| cg24950067                                                      | ZNF295;ZNF295;ZNF295          | 0.00047653        | 0.000476529          | 0.257517           | -3.88324                     | T down vs N                            | 19.092  | 17.2389   | 14.4468    | 1         |
| PCDHGA4;PCDHGA9;PCDHGA1;PCDHG<br>B1;PCDHGB6;PCDHGA11;PCDHGA11;P |                               |                   |                      |                    |                              |                                        |         |           |            |           |
| cg24954895                                                      | CDHGA11;PCDHGB3;PCDHGA11;PCD  | 0.00011027        | 0.00011027           | 7.12113            | 7.12113                      | T up vs N                              | 25.858  | 36.0937   | 22.3331    | 1         |
| cg24958687                                                      | PCDH85                        | 0.00051098        | 0.000510975          | 3.02075            | 3.02075                      | T up vs N                              | 18.8    | 11.4468   | 9.74186    | 1         |
| cg24965479                                                      | BCAS3;BCAS3                   | 7.38E-07          | 7.38E-07             | 0.200928           | -4.97691                     | T down vs N                            | 61.229  | 24.1217   | 6.30331    | 1         |
| cg24969778                                                      | PARK2;PARK2;PARK2             | 0.00015043        | 0.000150431          | 0.245517           | -4.07303                     | T down vs N                            | 24.315  | 18.4729   | 12.1556    | 1         |
| cg24975211                                                      | RN1D1;THRA                    | 3.23E-06          | 3.23E-06             | 3.98097            | 3.98097                      | T up vs N                              | 48.402  | 17.8764   | 5.90934    | 1         |
| cg24977306                                                      | UMODL1;UMODL1                 | 0.00320118        | 0.00320118           | 0.295601           | -3.38294                     | T down vs N                            | 11.996  | 13.9119   | 18.5559    | 1         |
| cg24978058                                                      | ME3;ME3;ME3                   | 2.46E-05          | 2.46E-05             | 0.146857           | -6.80934                     | T down vs N                            | 34.238  | 34.4661   | 16.1064    | 1         |
| cg24979093                                                      | DCSR10                        | 0.0003478         | 0.000347797          | 0.324189           | -3.08462                     | T down vs N                            | 20.443  | 11.8842   | 9.30123    | 1         |
| cg24979161                                                      | IFI27L1;IFI27L1               | 0.00010255        | 0.000102545          | 0.295608           | -3.38286                     | T down vs N                            | 26.228  | 13.9114   | 8.4864     | 1         |
| cg24979558                                                      | LOC349114                     | 0.0023233         | 0.0023233            | 0.28686            | -3.48602                     | T down vs N                            | 13.07   | 14.6056   | 17.8801    | 1         |
| cg24980158                                                      | CNS1S1;CNS1S1                 | 0.00039734        | 0.00039734           | 0.243577           | -4.10548                     | T down vs N                            | 19.865  | 18.6823   | 15.0472    | 1         |
| cg24980367                                                      | MST1R                         | 0.00022403        | 0.000224034          | 4.79855            | 4.79855                      | T up vs N                              | 22.424  | 23.0371   | 16.4378    | 1         |
| cg24980551                                                      | CDC42BPG                      | 0.00040129        | 0.000401285          | 0.222408           | -4.49624                     | T down vs N                            | 19.823  | 21.165    | 17.0834    | 1         |
| cg24980904                                                      | MYL12A                        | 0.00044753        | 0.000447531          | 0.306329           | -3.26446                     | T down vs N                            | 19.357  | 13.1099   | 10.8362    | 1         |
| cg24984523                                                      | PHF11;PHF11                   | 0.00099233        | 0.000992325          | 12.4251            | 12.4251                      | T up vs N                              | 16.15   | 59.4656   | 58.9146    | 1         |
| cg24990989                                                      | BUD31                         | 0.00112611        | 0.00112611           | 0.307119           | -3.25607                     | T down vs N                            | 15.67   | 13.053    | 13.328     | 1         |
| cg24995347                                                      | SP140;SP140                   | 8.68E-06          | 8.68E-06             | 0.20113            | -4.97191                     | T down vs N                            | 41.05   | 24.0915   | 9.39005    | 1         |
| cg24995657                                                      | PLEK2                         | 0.00089141        | 0.000891405          | 3.82121            | 3.82121                      | T up vs N                              | 16.563  | 16.8321   | 16.2603    | 1         |
| PCDHGA2;PCDHGA4;PCDHGA1;PCDHG<br>B1;PCDHGA3;PCDHGA4             |                               |                   |                      |                    |                              |                                        |         |           |            |           |
| cg24996161                                                      | TCL1A;TCL1A                   | 3.26E-05          | 3.26E-05             | 4.49539            | 4.49539                      | T up vs N                              | 32.527  | 21.1597   | 10.4084    | 1         |
| cg24996565                                                      | SLC39A7;SLC39A7               | 0.00051628        | 0.000516275          | 3.12826            | 3.12826                      | T up vs N                              | 18.757  | 12.1824   | 10.3917    | 1         |
| cg24996709                                                      | HIST1H2BD                     | 0.00061524        | 0.000615239          | 0.266192           | -3.75669                     | T down vs N                            | 18.036  | 16.4072   | 14.5553    | 1         |
| cg24996758                                                      | OASL;OASL                     | 0.00047433        | 0.000474325          | 0.269205           | -3.71465                     | T down vs N                            | 19.112  | 16.1293   | 13.5032    | 1         |
| cg24997562                                                      | OASL;OASL                     | 4.05E-06          | 4.05E-06             | 0.237492           | -4.21067                     | T down vs N                            | 46.633  | 19.3576   | 6.64173    | 1         |

| Probeset ID | UCSC_REFGENE_NAME                                                                               | p-value<br>(Type) | p-value (T vs.<br>N) | Ratio (T<br>vs. N) | Fold-<br>Change (T<br>vs. N) | Fold-Change (T vs.<br>N) (Description) | F(Type) | SS (Type) | SS (Error) | F (Error) |
|-------------|-------------------------------------------------------------------------------------------------|-------------------|----------------------|--------------------|------------------------------|----------------------------------------|---------|-----------|------------|-----------|
| cg25003777  | SERPINB1                                                                                        | 0.00185556        | 0.00185556           | 3.45711            | 3.45711                      | T up vs N                              | 13.851  | 14.4115   | 16.6478    | 1         |
| cg25006231  | C10orf41;C10orf41                                                                               | 4.84E-05          | 4.84E-05             | 4.3302             | 4.3302                       | T up vs N                              | 30.252  | 20.1188   | 10.6408    | 1         |
| cg25007705  | ECE1;ECE1;ECE1;ECE1                                                                             | 6.22E-08          | 6.22E-08             | 0.17227            | -5.80485                     | T down vs N                            | 88.833  | 28.9695   | 5.21777    | 1         |
| cg25009498  | FOXK2                                                                                           | 0.00119705        | 0.00119705           | 3.84986            | 3.84986                      | T up vs N                              | 15.441  | 17.0202   | 17.6364    | 1         |
| cg25009842  | ARID1B;ARID1B;ARID1B                                                                            | 0.00015869        | 0.000158692          | 3.67451            | 3.67451                      | T up vs N                              | 24.056  | 15.8634   | 10.5511    | 1         |
| cg25010115  | MYADML2                                                                                         | 0.00171552        | 0.00171552           | 0.279277           | -3.58067                     | T down vs N                            | 14.129  | 15.239    | 17.2573    | 1         |
| cg25013269  | LMAN2                                                                                           | 4.83E-05          | 4.83E-05             | 0.29857            | -3.3493                      | T down vs N                            | 30.267  | 13.6847   | 7.23422    | 1         |
| cg25015613  | MMP1;MMP1                                                                                       | 1.33E-06          | 1.33E-06             | 0.266455           | -3.75298                     | T down vs N                            | 55.846  | 16.3827   | 4.6937     | 1         |
| cg25015733  | MGAT4A                                                                                          | 0.00045089        | 0.000450891          | 0.255906           | -3.90768                     | T down vs N                            | 19.326  | 17.3987   | 14.4047    | 1         |
| cg25017342  | DCAF4;DCAF4;DCAF4;DCAF4                                                                         | 0.00544956        | 0.00544956           | 0.321612           | -3.10934                     | T down vs N                            | 10.311  | 12.0532   | 18.7036    | 1         |
| cg25017900  | PARD3                                                                                           | 2.35E-06          | 2.35E-06             | 0.294982           | -3.39003                     | T down vs N                            | 50.953  | 13.9598   | 4.3836     | 1         |
| cg25020073  | tAKR                                                                                            | 0.00016567        | 0.000165672          | 0.178742           | -5.59465                     | T down vs N                            | 23.848  | 27.7672   | 18.6294    | 1         |
| cg25020550  | TG                                                                                              | 0.00054717        | 0.000547167          | 0.256353           | -3.90088                     | T down vs N                            | 18.516  | 17.3543   | 14.9959    | 1         |
| cg25021530  | FGF10                                                                                           | 1.45E-05          | 1.45E-05             | 0.26116            | -3.82907                     | T down vs N                            | 37.567  | 16.8838   | 7.19088    | 1         |
| cg25023291  | TAS2R42                                                                                         | 4.22E-06          | 4.22E-06             | 0.117258           | -8.52822                     | T down vs N                            | 46.316  | 43.0289   | 14.8645    | 1         |
| cg25024442  | SLC4A1AP                                                                                        | 0.00019347        | 0.000193466          | 0.21248            | -4.70632                     | T down vs N                            | 23.109  | 22.4704   | 15.5577    | 1         |
| cg25025181  | SMYD3;SMYD3                                                                                     | 3.71E-07          | 3.71E-07             | 0.136261           | -7.33886                     | T down vs N                            | 68.066  | 37.2097   | 8.74677    | 1         |
| cg25025646  | NOS3;ATG9B                                                                                      | 0.00031013        | 0.000310129          | 3.45367            | 3.45367                      | T up vs N                              | 20.949  | 14.3883   | 10.9894    | 1         |
| cg25026237  | CDYL;CDYL                                                                                       | 0.00069914        | 0.000699135          | 7.09827            | 7.09827                      | T up vs N                              | 17.52   | 35.9756   | 32.8547    | 1         |
| cg25026992  | PCDHB7;PCDHB7                                                                                   | 0.00672893        | 0.00672893           | 3.2629             | 3.2629                       | T up vs N                              | 9.6758  | 13.0993   | 21.6613    | 1         |
| cg25027788  | VWF                                                                                             | 6.17E-08          | 6.17E-08             | 7.38516            | 7.38516                      | T up vs N                              | 96.828  | 35.2422   | 5.45954    | 1         |
| cg25027798  | PCDHA7;PCDHA13;PCDHA12;PCDHA6;<br>PCDHA10;PCDHA4;PCDHA11;PCDHA8;<br>PCDHA1;PCDHA2;PCDHA6;PCDHA1 | 8.39E-06          | 8.39E-06             | 8.39864            | 8.39864                      | T up vs N                              | 41.285  | 42.4163   | 16.4384    | 1         |
| cg25028162  | SIGLEC14                                                                                        | 3.82E-05          | 3.82E-05             | 0.244794           | -4.08507                     | T down vs N                            | 31.607  | 18.5506   | 9.3908     | 1         |
| cg25028293  | PLEKHG5;PLEKHG5;PLEKHG5;PLEKHG5                                                                 | 2.93E-05          | 2.93E-05             | 0.292355           | -3.4205                      | T down vs N                            | 33.161  | 14.1652   | 6.83469    | 1         |
| cg25029998  | HRNP3                                                                                           | 3.97E-06          | 3.97E-06             | 0.315127           | -3.17332                     | T down vs N                            | 46.794  | 12.4899   | 4.2706     | 1         |
| cg25030888  | SGIP1                                                                                           | 0.00038313        | 0.000383128          | 3.21832            | 3.21832                      | T up vs N                              | 20.022  | 12.7963   | 10.2256    | 1         |
| cg25032321  | STK24                                                                                           | 0.00023292        | 0.000232915          | 0.245345           | -4.07589                     | T down vs N                            | 22.244  | 18.4914   | 13.3008    | 1         |
| cg25032991  | TANC1;TANC1                                                                                     | 0.00027442        | 0.000274422          | 0.205355           | -4.86961                     | T down vs N                            | 21.496  | 23.4709   | 17.4698    | 1         |
| cg25033144  | KIR3DX1                                                                                         | 0.00042639        | 0.000426393          | 0.223762           | -4.46904                     | T down vs N                            | 19.563  | 20.9945   | 17.1708    | 1         |
| cg25033759  | LOC115110                                                                                       | 7.83E-05          | 7.83E-05             | 3.95456            | 3.95456                      | T up vs N                              | 27.632  | 17.7045   | 10.2515    | 1         |
| cg25035485  | APOB                                                                                            | 2.32E-05          | 2.32E-05             | 8.32428            | 8.32428                      | T up vs N                              | 34.595  | 42.0626   | 19.4536    | 1         |
| cg25036284  | FAM59B                                                                                          | 0.00129526        | 0.00129526           | 25.6095            | 25.6095                      | T up vs N                              | 15.148  | 98.5021   | 104.041    | 1         |
| cg25036527  | APOL5                                                                                           | 0.00081956        | 0.000819555          | 0.274945           | -3.63709                     | T down vs N                            | 16.89   | 15.6148   | 14.7917    | 1         |
| cg25037043  | C10orf50                                                                                        | 2.00E-05          | 2.00E-05             | 0.309371           | -3.23236                     | T down vs N                            | 35.51   | 12.8919   | 5.80881    | 1         |
| cg25037165  | TEAD1                                                                                           | 0.00012506        | 0.000125057          | 0.16195            | -6.17474                     | T down vs N                            | 25.226  | 31.0404   | 19.688     | 1         |
| cg25039325  | ARHGAP25;ARHGAP25;ARHGAP25;AR                                                                   | 8.19E-06          | 8.19E-06             | 0.142906           | -6.99762                     | T down vs N                            | 41.454  | 35.4532   | 13.684     | 1         |
| cg25040353  | HGAP25;ARHGAP25;ARHGAP25                                                                        | 6.65E-05          | 6.65E-05             | 0.332788           | -3.00492                     | T down vs N                            | 28.504  | 11.3382   | 6.36434    | 1         |
| cg25041439  | COL25A1;COL25A1                                                                                 | 0.00017069        | 0.000170687          | 0.307194           | -3.25527                     | T down vs N                            | 23.705  | 13.0475   | 8.80663    | 1         |
| cg25042789  | HYLS1                                                                                           | 2.70E-05          | 2.70E-05             | 0.255228           | -3.91806                     | T down vs N                            | 33.672  | 17.4665   | 8.29952    | 1         |
| cg25044651  | TAP1                                                                                            | 8.37E-05          | 8.37E-05             | 5.5774             | 5.5774                       | T up vs N                              | 27.282  | 27.6677   | 16.2263    | 1         |
| cg25045562  | LVRN                                                                                            | 0.00353661        | 0.00353661           | 0.292205           | -3.42225                     | T down vs N                            | 11.671  | 14.177    | 19.4356    | 1         |
| cg25050447  | HEXA                                                                                            | 0.00119936        | 0.00119936           | 0.29772            | -3.35886                     | T down vs N                            | 15.434  | 13.7493   | 14.2538    | 1         |
| cg25050565  | CARD14;CARD14                                                                                   | 4.04E-06          | 4.04E-06             | 0.332677           | -3.00592                     | T down vs N                            | 46.658  | 11.3451   | 3.89044    | 1         |
| cg25053386  | NRG1                                                                                            | 8.12E-05          | 8.12E-05             | 0.213234           | -4.68967                     | T down vs N                            | 27.442  | 22.3678   | 13.0417    | 1         |
| cg25055520  | MUC6                                                                                            | 0.00102849        | 0.00102849           | 0.324558           | -3.08112                     | T down vs N                            | 16.013  | 11.8602   | 11.8505    | 1         |
| cg25055744  | CCT2                                                                                            | 6.06E-06          | 6.06E-06             | 0.330846           | -3.02256                     | T down vs N                            | 43.613  | 11.4592   | 4.20392    | 1         |
| cg25060243  | TBCD;ZNF750                                                                                     | 6.06E-06          | 6.06E-06             | 0.330846           | -3.02256                     | T down vs N                            | 43.613  | 11.4592   | 4.20392    | 1         |
| cg25060243  | UGT1A10;UGT1A6;UGT1A8;UGT1A6;U                                                                  | 6.20E-05          | 6.20E-05             | 0.271658           | -3.6811                      | T down vs N                            | 28.883  | 15.9071   | 8.81193    | 1         |
| cg25060890  | GT1A9;UGT1A4;UGT1A7;UGT1A5                                                                      | 0.00052665        | 0.000526652          | 0.235015           | -4.25505                     | T down vs N                            | 18.675  | 19.6409   | 16.828     | 1         |
| cg25061451  | RPS6KC1;RPS6KC1                                                                                 | 6.43E-06          | 6.43E-06             | 0.164088           | -6.09428                     | T down vs N                            | 43.187  | 30.5947   | 11.3349    | 1         |
| cg25063151  | DARS2                                                                                           | 0.00020198        | 0.000201979          | 0.118858           | -8.41338                     | T down vs N                            | 22.907  | 42.4863   | 29.6762    | 1         |
| cg25064029  | MXRA8                                                                                           | 0.00278467        | 0.00278467           | 0.279964           | -3.57189                     | T down vs N                            | 12.457  | 15.1804   | 19.4977    | 1         |
| cg25064910  | ALPK1;ALPK1                                                                                     | 2.79E-05          | 2.79E-05             | 0.203239           | -4.92033                     | T down vs N                            | 33.458  | 23.7792   | 11.3714    | 1         |
| cg25065716  | KLB                                                                                             | 2.64E-05          | 2.64E-05             | 0.227895           | -4.38799                     | T down vs N                            | 33.798  | 20.4844   | 9.69739    | 1         |
| cg25066665  | ADARB2                                                                                          | 0.00066746        | 0.000667462          | 0.142294           | -7.02772                     | T down vs N                            | 17.706  | 35.6098   | 32.1789    | 1         |
| cg25067242  | RPRD2                                                                                           | 6.88E-05          | 6.88E-05             | 4.78586            | 4.78586                      | T up vs N                              | 28.323  | 22.9594   | 12.97      | 1         |
| cg25069354  | NGF                                                                                             | 3.94E-06          | 3.94E-06             | 0.198864           | -5.02856                     | T down vs N                            | 46.843  | 24.4331   | 8.34555    | 1         |
| cg25069420  | TTL6;TTL6                                                                                       | 0.00345873        | 0.00345873           | 0.331358           | -3.01788                     | T down vs N                            | 11.743  | 11.4271   | 15.5694    | 1         |
| cg25070340  | NOP58;SNORD70                                                                                   | 9.71E-05          | 9.71E-05             | 0.293911           | -3.40239                     | T down vs N                            | 26.509  | 14.0431   | 8.47598    | 1         |
| cg25070482  | CLPTM1L                                                                                         | 9.71E-05          | 9.71E-05             | 0.293911           | -3.40239                     | T down vs N                            | 26.509  | 14.0431   | 8.47598    | 1         |
| cg25070482  | ARHGAP25;ARHGAP25;ARHGAP25;AR                                                                   | 9.70E-07          | 9.70E-07             | 0.186325           | -5.36698                     | T down vs N                            | 58.67   | 26.4434   | 7.21143    | 1         |
| cg25071744  | HGAP25;ARHGAP25;ARHGAP25                                                                        | 9.34E-05          | 9.34E-05             | 3.36857            | 3.36857                      | T up vs N                              | 26.711  | 13.8149   | 8.27514    | 1         |
| cg25074317  | APOB                                                                                            | 9.33E-05          | 9.33E-05             | 0.141976           | -7.04342                     | T down vs N                            | 26.712  | 35.6914   | 21.3785    | 1         |
| cg25076197  | FAM83H                                                                                          | 0.00060655        | 0.000606547          | 3.94366            | 3.94366                      | T up vs N                              | 18.094  | 17.6335   | 15.5932    | 1         |
| cg25076881  | MLL5;MLL5                                                                                       | 0.00013536        | 0.000135361          | 0.296897           | -3.36817                     | T down vs N                            | 24.833  | 13.8122   | 8.89927    | 1         |
| cg25076881  | OR10J1                                                                                          | 0.00013536        | 0.000135361          | 0.296897           | -3.36817                     | T down vs N                            | 24.833  | 13.8122   | 8.89927    | 1         |

| Probeset ID | UCSC_REFGENE_NAME                                                               | p-value<br>(Type) | p-value (T vs.<br>N) | Ratio (T<br>vs. N) | Fold-<br>Change (T<br>vs. N) | Fold-Change (T vs.<br>N) (Description) | F(Type) | SS (Type) | SS (Error) | F (Error) |
|-------------|---------------------------------------------------------------------------------|-------------------|----------------------|--------------------|------------------------------|----------------------------------------|---------|-----------|------------|-----------|
| cg25082710  | IVL                                                                             | 1.65E-07          | 1.65E-07             | 0.122892           | -8.13721                     | T down vs N                            | 76.886  | 41.1652   | 8.5665     | 1         |
| cg25084760  | PCCA;PCCA                                                                       | 4.71E-05          | 4.71E-05             | 0.291032           | -3.43605                     | T down vs N                            | 30.413  | 14.2698   | 7.50719    | 1         |
| cg25085925  | AR                                                                              | 0.0034473         | 0.0034473            | 0.311352           | -3.21179                     | T down vs N                            | 11.754  | 12.752    | 17.3587    | 1         |
| cg25087341  | PHLDB2;PLCXD2                                                                   | 0.00047476        | 0.000474763          | 0.30937            | -3.23238                     | T down vs N                            | 19.108  | 12.8919   | 10.7951    | 1         |
| cg25089598  | ILK;ILK;ILK                                                                     | 2.79E-05          | 2.79E-05             | 0.280568           | -3.56419                     | T down vs N                            | 33.472  | 15.129    | 7.23178    | 1         |
| cg25092838  | OTX2OS1                                                                         | 0.0055634         | 0.0055634            | 0.315044           | -3.17416                     | T down vs N                            | 10.248  | 12.4957   | 19.5096    | 1         |
| cg25095032  | DDAH2                                                                           | 0.00044557        | 0.000445574          | 8.09757            | 8.09757                      | T up vs N                              | 19.376  | 40.9736   | 33.8348    | 1         |
| cg25095697  | LOC645166;LOC645166;LOC645166                                                   | 8.60E-06          | 8.60E-06             | 0.193024           | -5.18071                     | T down vs N                            | 41.117  | 25.3433   | 9.86182    | 1         |
| cg25095814  | CASP8;CASP8;CASP8;CASP8                                                         | 1.83E-05          | 1.83E-05             | 0.19503            | -5.12743                     | T down vs N                            | 36.062  | 25.0257   | 11.1035    | 1         |
| cg25096189  | PTPRG                                                                           | 2.92E-05          | 2.92E-05             | 0.247717           | -4.03686                     | T down vs N                            | 33.196  | 18.239    | 8.79106    | 1         |
| cg25099892  | C13orf35                                                                        | 4.35E-06          | 4.35E-06             | 0.298659           | -3.3483                      | T down vs N                            | 46.094  | 13.678    | 4.74786    | 1         |
| cg25100880  | OR52E8                                                                          | 6.40E-06          | 6.40E-06             | 0.210673           | -4.7467                      | T down vs N                            | 43.219  | 22.719    | 8.41078    | 1         |
| cg25101184  | RPL13AP3                                                                        | 3.37E-05          | 3.37E-05             | 0.331017           | -3.02099                     | T down vs N                            | 32.348  | 11.4484   | 5.66258    | 1         |
| cg25101225  | MCF2L;MCF2L                                                                     | 8.17E-05          | 8.17E-05             | 7.63882            | 7.63882                      | T up vs N                              | 27.408  | 38.7205   | 22.6038    | 1         |
| cg25104107  | KPRP                                                                            | 6.86E-05          | 6.86E-05             | 0.152488           | -6.55791                     | T down vs N                            | 28.335  | 33.1274   | 18.7059    | 1         |
| cg25110423  | NFYA;NFYA;LOC221442                                                             | 9.70E-05          | 9.70E-05             | 3.74908            | 3.74908                      | T up vs N                              | 26.513  | 16.357    | 9.871      | 1         |
| cg25114611  | FKBP5;LOC285847                                                                 | 8.82E-05          | 8.82E-05             | 0.253212           | -3.94925                     | T down vs N                            | 27.006  | 17.67     | 10.4688    | 1         |
| cg25119415  | MNDA                                                                            | 1.24E-06          | 1.24E-06             | 0.091083           | -10.979                      | T down vs N                            | 56.435  | 53.7688   | 15.2441    | 1         |
| cg25121227  | GTF3A                                                                           | 0.00082865        | 0.000828647          | 0.325633           | -3.07094                     | T down vs N                            | 16.847  | 11.7906   | 11.1977    | 1         |
| cg25121437  | FEZ1                                                                            | 1.67E-05          | 1.67E-05             | 4.06519            | 4.06519                      | T up vs N                              | 36.674  | 18.4222   | 8.03711    | 1         |
| cg25122233  | HOXC4;HOXC5;HOXC6                                                               | 0.00252898        | 0.00252898           | 0.292569           | -3.418                       | T down vs N                            | 12.781  | 14.1483   | 17.7115    | 1         |
| cg25122699  | CPEB4                                                                           | 0.00146035        | 0.00146035           | 0.221567           | -4.51332                     | T down vs N                            | 14.708  | 21.2719   | 23.1399    | 1         |
| cg25123102  | CDH22                                                                           | 9.81E-05          | 9.81E-05             | 8.16042            | 8.16042                      | T up vs N                              | 26.454  | 41.2771   | 24.9654    | 1         |
| cg25123266  | SLC26A8;SLC26A8                                                                 | 8.75E-05          | 8.75E-05             | 5.06015            | 5.06015                      | T up vs N                              | 27.046  | 24.6229   | 14.5663    | 1         |
| cg25124300  | XDH                                                                             | 6.60E-05          | 6.60E-05             | 0.285391           | -3.50397                     | T down vs N                            | 28.549  | 14.726    | 8.25303    | 1         |
| cg25125060  | NR2E1                                                                           | 0.00133465        | 0.00133465           | 0.321626           | -3.10921                     | T down vs N                            | 15.038  | 12.0523   | 12.8236    | 1         |
| cg25126698  | PCDHGA4;PCDHGB3;PCDHGA1;PCDHG<br>A5;PCDHGB1;PCDHGA3;PCDHGB3;PC<br>DHGA2;PCDHGB2 | 8.13E-05          | 8.13E-05             | 3.76739            | 3.76739                      | T up vs N                              | 27.435  | 16.4778   | 9.60983    | 1         |
| cg25128583  | CST2                                                                            | 2.00E-05          | 2.00E-05             | 0.202239           | -4.94464                     | T down vs N                            | 35.523  | 23.9266   | 10.7769    | 1         |
| cg25129124  | KBTBD5                                                                          | 0.00035196        | 0.000351957          | 3.93606            | 3.93606                      | T up vs N                              | 20.391  | 17.584    | 13.7973    | 1         |
| cg25130710  | FBRSL1                                                                          | 0.00049389        | 0.000493894          | 3.02538            | 3.02538                      | T up vs N                              | 18.942  | 11.4785   | 9.69565    | 1         |
| cg25132536  | EPN2;EPN2;EPN2                                                                  | 0.00727489        | 0.00727489           | 3.28149            | 3.28149                      | T up vs N                              | 9.4454  | 13.2255   | 22.4034    | 1         |
| cg25133753  | WFDC11                                                                          | 0.000324          | 0.000323996          | 0.22112            | -4.52244                     | T down vs N                            | 20.755  | 21.329    | 16.4425    | 1         |
| cg25134701  | NET1;NET1                                                                       | 2.15E-06          | 2.15E-06             | 0.161007           | -6.21093                     | T down vs N                            | 51.714  | 31.24     | 9.66545    | 1         |
| cg25135457  | COASY;COASY;COASY;COASY;COASY                                                   | 4.90E-05          | 4.90E-05             | 0.064595           | -15.4811                     | T down vs N                            | 30.189  | 70.2979   | 37.2578    | 1         |
| cg25136495  | LPAR5;LPAR5                                                                     | 0.00015051        | 0.000150506          | 15.7172            | 15.7172                      | T up vs N                              | 24.313  | 71.0769   | 46.7748    | 1         |
| cg25137030  | C15orf48;C15orf48                                                               | 4.76E-05          | 4.76E-05             | 17.2126            | 17.2126                      | T up vs N                              | 30.345  | 75.844    | 39.9907    | 1         |
| cg25137204  | P2RY6;P2RY6                                                                     | 0.00046517        | 0.000465167          | 3.81499            | 3.81499                      | T up vs N                              | 19.194  | 16.7912   | 13.9972    | 1         |
| cg25138713  | MAP3K4;MAP3K4                                                                   | 0.00083949        | 0.000839491          | 0.323911           | -3.08727                     | T down vs N                            | 16.796  | 11.9023   | 11.338     | 1         |
| cg25138715  | VEPH1;VEPH1;VEPH1;VEPH1;VEPH1;V<br>EPH1                                         | 0.00228449        | 0.00228449           | 3.54343            | 3.54343                      | T up vs N                              | 13.128  | 14.9902   | 18.2703    | 1         |
| cg25139229  | ARHGAP22                                                                        | 7.50E-05          | 7.50E-05             | 14.0853            | 14.0853                      | T up vs N                              | 27.862  | 65.5323   | 37.6326    | 1         |
| cg25139843  | ANO3                                                                            | 0.00050958        | 0.000509583          | 0.213261           | -4.68909                     | T down vs N                            | 18.812  | 22.3642   | 19.0217    | 1         |
| cg25139877  | LOC148824                                                                       | 1.28E-06          | 1.28E-06             | 0.079586           | -12.565                      | T down vs N                            | 56.179  | 59.9951   | 17.0867    | 1         |
| cg25140444  | PKN2                                                                            | 0.00325445        | 0.00325445           | 0.28187            | -3.54773                     | T down vs N                            | 11.942  | 15.019    | 20.1233    | 1         |
| cg25141490  | IL17B                                                                           | 5.91E-05          | 5.91E-05             | 0.303003           | -3.3003                      | T down vs N                            | 29.15   | 13.353    | 7.32931    | 1         |
| cg25143743  | DAP                                                                             | 0.00013071        | 0.000130708          | 0.206446           | -4.84389                     | T down vs N                            | 25.006  | 23.3142   | 14.9175    | 1         |
| cg25145195  | C6orf10                                                                         | 0.00068406        | 0.000684056          | 0.253123           | -3.95064                     | T down vs N                            | 17.607  | 17.679    | 16.0653    | 1         |
| cg25147026  | PTGS2                                                                           | 1.93E-05          | 1.93E-05             | 0.152186           | -6.57091                     | T down vs N                            | 35.74   | 33.1972   | 14.8618    | 1         |
| cg25147158  | TRIM61;TRIM61                                                                   | 0.00494073        | 0.00494073           | 3.65202            | 3.65202                      | T up vs N                              | 10.612  | 15.7141   | 23.6918    | 1         |
| cg25147193  | MIR181C                                                                         | 0.00713448        | 0.00713448           | 7.81032            | 7.81032                      | T up vs N                              | 9.5027  | 39.5707   | 66.6264    | 1         |
| cg25148282  | HSF5                                                                            | 0.00134351        | 0.00134351           | 0.321289           | -3.11247                     | T down vs N                            | 15.013  | 12.0746   | 12.8681    | 1         |
| cg25148347  | C6orf132                                                                        | 1.39E-05          | 1.39E-05             | 0.327223           | -3.05602                     | T down vs N                            | 37.879  | 11.6884   | 4.93714    | 1         |
| cg25149218  | PARD3B;PARD3B;PARD3B                                                            | 0.00026562        | 0.000265624          | 0.308029           | -3.24645                     | T down vs N                            | 21.644  | 12.9876   | 9.60106    | 1         |
| cg25150929  | C10orf82                                                                        | 3.77E-05          | 3.77E-05             | 0.255635           | -3.91182                     | T down vs N                            | 31.69   | 17.4258   | 8.79822    | 1         |
| cg25153233  | LOC339568                                                                       | 0.00014088        | 0.000140882          | 0.289819           | -3.45043                     | T down vs N                            | 24.636  | 14.3666   | 9.3304     | 1         |
| cg25153741  | COL23A1                                                                         | 0.00087618        | 0.00087618           | 0.158247           | -6.31925                     | T down vs N                            | 16.63   | 31.8343   | 30.6291    | 1         |
| cg25153755  | SYN1;SYN1                                                                       | 0.00025797        | 0.000257974          | 5.8028             | 5.8028                       | T up vs N                              | 21.776  | 28.9579   | 21.2767    | 1         |
| cg25155064  | MPZL3                                                                           | 1.87E-05          | 1.87E-05             | 0.178381           | -5.60599                     | T down vs N                            | 35.954  | 27.8326   | 12.386     | 1         |
| cg25156118  | LRFN1                                                                           | 0.00012427        | 0.000124273          | 3.4427             | 3.4427                       | T up vs N                              | 25.257  | 14.3145   | 9.06801    | 1         |
| cg25156198  | CDK6;CDK6                                                                       | 2.07E-05          | 2.07E-05             | 0.204637           | -4.88671                     | T down vs N                            | 35.303  | 23.575    | 10.6848    | 1         |
| cg25162948  | PHF11;PHF11                                                                     | 0.00304906        | 0.00304906           | 3.30744            | 3.30744                      | T up vs N                              | 12.156  | 13.4014   | 17.6394    | 1         |
| cg25168700  | C11orf20                                                                        | 3.84E-05          | 3.84E-05             | 3.32961            | 3.32961                      | T up vs N                              | 31.581  | 13.5515   | 6.86571    | 1         |
| cg25179758  | SPG20;SPG20;SPG20;SPG20                                                         | 8.87E-07          | 8.87E-07             | 0.287093           | -3.48319                     | T down vs N                            | 59.496  | 14.5867   | 3.92273    | 1         |
| cg25180550  | TMEM5                                                                           | 9.09E-05          | 9.09E-05             | 0.261063           | -3.83049                     | T down vs N                            | 26.851  | 16.8931   | 10.0662    | 1         |
| cg25181144  | HS3ST3B1                                                                        | 5.42E-06          | 5.42E-06             | 0.248748           | -4.02014                     | T down vs N                            | 44.442  | 18.1306   | 6.52746    | 1         |
| cg25182501  | DQX1                                                                            | 0.00116872        | 0.00116872           | 0.26706            | -3.74448                     | T down vs N                            | 15.531  | 16.3266   | 16.8202    | 1         |
| cg25183989  | SYCP2                                                                           | 0.0003866         | 0.000386597          | 3.70752            | 3.70752                      | T up vs N                              | 19.983  | 16.0822   | 12.8764    | 1         |
| cg25188006  | CHL1                                                                            | 1.09E-05          | 1.09E-05             | 3.50315            | 3.50315                      | T up vs N                              | 39.485  | 14.7205   | 5.96501    | 1         |

| Probeset ID                                                                  | UCSC_REFGENE_NAME       | p-value<br>(Type) | p-value (T vs.<br>N) | Ratio (T<br>vs. N) | Fold-<br>Change (T<br>vs. N) | Fold-Change (T vs.<br>N) (Description) | F(Type) | SS (Type) | SS (Error) | F (Error) |
|------------------------------------------------------------------------------|-------------------------|-------------------|----------------------|--------------------|------------------------------|----------------------------------------|---------|-----------|------------|-----------|
| cg25189608                                                                   | CCDC82                  | 0.00048527        | 0.000485274          | 0.23009            | -4.34613                     | T down vs N                            | 19.016  | 20.2197   | 17.0128    | 1         |
| cg25192855                                                                   | IRF6                    | 2.73E-06          | 2.73E-06             | 9.90665            | 9.90665                      | T up vs N                              | 49.74   | 49.2547   | 15.8438    | 1         |
| cg25195334                                                                   | STC1                    | 8.37E-07          | 8.37E-07             | 0.329499           | -3.03491                     | T down vs N                            | 60.037  | 11.5438   | 3.07647    | 1         |
| cg25195497                                                                   | FAM50B                  | 0.00022865        | 0.00022865           | 3.18415            | 3.18415                      | T up vs N                              | 22.329  | 12.5637   | 9.00251    | 1         |
| cg25197194                                                                   | CCDC48                  | 1.04E-05          | 1.04E-05             | 0.233883           | -4.27565                     | T down vs N                            | 39.823  | 19.7722   | 7.94407    | 1         |
| cg25201255                                                                   | NTF3                    | 0.00057477        | 0.000574766          | 0.314232           | -3.18236                     | T down vs N                            | 18.314  | 12.5515   | 10.9658    | 1         |
| cg25203361                                                                   | PPM1L                   | 0.00303647        | 0.00303647           | 0.313082           | -3.19405                     | T down vs N                            | 12.17   | 12.6311   | 16.6069    | 1         |
| cg25204440                                                                   | IRF6                    | 0.00552193        | 0.00552193           | 9.55578            | 9.55578                      | T up vs N                              | 10.271  | 47.7179   | 74.3368    | 1         |
| cg25204852                                                                   | DCC                     | 1.54E-05          | 1.54E-05             | 0.244972           | -4.08211                     | T down vs N                            | 37.195  | 18.5315   | 7.9716     | 1         |
| cg25206451                                                                   | OR2A2                   | 0.00263595        | 0.00263595           | 0.312823           | -3.1967                      | T down vs N                            | 12.641  | 12.6492   | 16.01      | 1         |
| cg25208677                                                                   | SLC35D1                 | 2.00E-05          | 2.00E-05             | 0.275222           | -3.63343                     | T down vs N                            | 35.529  | 15.5905   | 7.02089    | 1         |
| cg25210796                                                                   | CACHD1                  | 1.04E-05          | 1.04E-05             | 0.262388           | -3.81115                     | T down vs N                            | 39.824  | 16.766    | 6.73606    | 1         |
| cg25210835                                                                   | GSTM5                   | 1.14E-05          | 1.14E-05             | 20.3813            | 20.3813                      | T up vs N                              | 39.17   | 85.1188   | 34.7689    | 1         |
| cg25211622                                                                   | SLC25A22                | 0.00268467        | 0.00268467           | 3.13193            | 3.13193                      | T up vs N                              | 12.58   | 12.2075   | 15.5266    | 1         |
| cg25212571                                                                   | SPRR2C                  | 0.00081816        | 0.000818157          | 0.244661           | -4.08728                     | T down vs N                            | 16.897  | 18.5649   | 17.5793    | 1         |
| cg25212814                                                                   | C6orf164                | 0.00017484        | 0.000174838          | 0.249502           | -4.00798                     | T down vs N                            | 23.59   | 18.0518   | 12.2437    | 1         |
| cg25213055                                                                   | EXOC2                   | 0.00075709        | 0.000757092          | 0.307853           | -3.2483                      | T down vs N                            | 17.203  | 13.0002   | 12.0912    | 1         |
| cg25213795                                                                   | LRRC2;LRRC2             | 0.00259738        | 0.00259738           | 0.24472            | -4.08631                     | T down vs N                            | 12.691  | 18.5586   | 23.3977    | 1         |
| cg25215835                                                                   | IQCF1                   | 0.00064378        | 0.000643782          | 0.09477            | -10.5518                     | T down vs N                            | 17.852  | 52.0023   | 46.6083    | 1         |
| cg25216634                                                                   | RPH3AL                  | 2.42E-05          | 2.42E-05             | 0.272253           | -3.67306                     | T down vs N                            | 34.33   | 15.8538   | 7.38895    | 1         |
| cg25220979                                                                   | IGF2BP1;IGF2BP1         | 0.00017558        | 0.000175578          | 0.233845           | -4.27634                     | T down vs N                            | 23.57   | 19.7766   | 13.4251    | 1         |
| cg25221774                                                                   | PCCA;PCCA               | 0.00066182        | 0.00066182           | 0.328046           | -3.04836                     | T down vs N                            | 17.74   | 11.6359   | 10.4946    | 1         |
| cg25223408                                                                   | FLJ30058                | 7.35E-05          | 7.35E-05             | 4.0886             | 4.0886                       | T up vs N                              | 27.971  | 18.5735   | 10.6244    | 1         |
| PCDHA6;PCDHA2;PCDHA1;PCDHA7;PCDHA1;PCDHA8;PCDHA6;PCDHA5;PCDHA8;PCDHA3;PCDHA4 |                         |                   |                      |                    |                              |                                        |         |           |            |           |
| cg25225155                                                                   | HA8;PCDHA3;PCDHA4       | 1.89E-05          | 1.89E-05             | 4.37734            | 4.37734                      | T up vs N                              | 35.86   | 20.4171   | 9.10975    | 1         |
| cg25230363                                                                   | AQP1                    | 5.35E-05          | 5.35E-05             | 0.235571           | -4.24501                     | T down vs N                            | 29.697  | 19.5769   | 10.5477    | 1         |
| cg25230549                                                                   | SNORD115-7              | 0.00318095        | 0.00318095           | 0.232779           | -4.29592                     | T down vs N                            | 12.017  | 19.9011   | 26.4984    | 1         |
| cg25232795                                                                   | SLC36A1                 | 0.00291845        | 0.00291845           | 0.320973           | -3.11553                     | T down vs N                            | 12.301  | 12.0955   | 15.7328    | 1         |
| cg25235770                                                                   | PPM1H                   | 8.86E-06          | 8.86E-06             | 3.41966            | 3.41966                      | T up vs N                              | 40.908  | 14.1595   | 5.53811    | 1         |
| cg25236050                                                                   | OR6C65                  | 0.00021381        | 0.00021381           | 0.31167            | -3.20852                     | T down vs N                            | 22.641  | 12.7297   | 8.99606    | 1         |
| cg25240964                                                                   | FRAS1;FRAS1             | 6.02E-05          | 6.02E-05             | 0.304588           | -3.28313                     | T down vs N                            | 29.05   | 13.2366   | 7.29031    | 1         |
| cg25242471                                                                   | WNT6                    | 0.00012164        | 0.000121638          | 5.07047            | 5.07047                      | T up vs N                              | 25.364  | 24.6849   | 15.5714    | 1         |
| cg25242498                                                                   | RFX2;RFX2               | 0.00134072        | 0.00134072           | 0.32336            | -3.09253                     | T down vs N                            | 15.021  | 11.9383   | 12.7164    | 1         |
| cg25242988                                                                   | OR7G2                   | 0.00020733        | 0.000207334          | 0.189917           | -5.26545                     | T down vs N                            | 22.784  | 25.8457   | 18.15      | 1         |
| PAX8;PAX8;PAX8;PAX8;PAX8;LOC440839                                           |                         |                   |                      |                    |                              |                                        |         |           |            |           |
| cg25243455                                                                   | 39                      | 0.00260086        | 0.00260086           | 9.72501            | 9.72501                      | T up vs N                              | 12.686  | 48.463    | 61.1211    | 1         |
| cg25246031                                                                   | IGFL1                   | 0.00058918        | 0.000589182          | 0.29579            | -3.38078                     | T down vs N                            | 18.212  | 13.8974   | 12.2093    | 1         |
| cg25247183                                                                   | LGALS1                  | 0.00057819        | 0.000578187          | 0.26758            | -3.7372                      | T down vs N                            | 18.289  | 16.2785   | 14.2408    | 1         |
| cg25247520                                                                   | MIR1204;PVT1            | 3.54E-06          | 3.54E-06             | 0.142887           | -6.99856                     | T down vs N                            | 47.684  | 35.4581   | 11.8976    | 1         |
| cg25247636                                                                   | EMR1                    | 0.00012137        | 0.000121367          | 0.217314           | -4.60163                     | T down vs N                            | 25.376  | 21.8225   | 13.7597    | 1         |
| cg25248045                                                                   | MAP4K4;MAP4K4;MAP4K4    | 0.000956          | 0.000956             | 3.28063            | 3.28063                      | T up vs N                              | 16.293  | 13.2197   | 12.9822    | 1         |
| cg25248662                                                                   | MYO1F                   | 0.00019592        | 0.00019592           | 0.227181           | -4.40178                     | T down vs N                            | 23.05   | 20.5713   | 14.2796    | 1         |
| cg25249241                                                                   | MPZL2                   | 0.00065659        | 0.000656589          | 0.330222           | -3.02827                     | T down vs N                            | 17.772  | 11.4983   | 10.3518    | 1         |
| cg25250968                                                                   | NEDD9                   | 5.89E-05          | 5.89E-05             | 0.204325           | -4.89416                     | T down vs N                            | 29.162  | 23.6203   | 12.9594    | 1         |
| SLC39A14;SLC39A14;SLC39A14;SLC39A14                                          |                         |                   |                      |                    |                              |                                        |         |           |            |           |
| cg25257677                                                                   | A14                     | 8.53E-05          | 8.53E-05             | 6.06307            | 6.06307                      | T up vs N                              | 27.179  | 30.4211   | 17.9089    | 1         |
| cg25257766                                                                   | PARVB;PARVB             | 0.0057993         | 0.0057993            | 3.12875            | 3.12875                      | T up vs N                              | 10.122  | 12.1858   | 19.263     | 1         |
| cg25258233                                                                   | HLA-DRA                 | 0.00058747        | 0.000587472          | 0.256893           | -3.89267                     | T down vs N                            | 18.224  | 17.3006   | 15.1892    | 1         |
| cg25259754                                                                   | FCRL3                   | 1.80E-05          | 1.80E-05             | 0.232413           | -4.30269                     | T down vs N                            | 36.182  | 19.9442   | 8.8196     | 1         |
| cg25263189                                                                   | RADIL                   | 4.54E-05          | 4.54E-05             | 0.270171           | -3.70136                     | T down vs N                            | 30.62   | 16.0414   | 8.38214    | 1         |
| cg25265126                                                                   | IL1RN;IL1RN;IL1RN;IL1RN | 0.00061623        | 0.000616227          | 0.234188           | -4.27008                     | T down vs N                            | 18.029  | 19.7367   | 17.5154    | 1         |
| cg25268435                                                                   | NFE2L2;NFE2L2;NFE2L2    | 2.95E-05          | 2.95E-05             | 4.14468            | 4.14468                      | T up vs N                              | 33.122  | 18.9345   | 9.14648    | 1         |
| cg25270886                                                                   | CBX2;CBX2               | 7.75E-06          | 7.75E-06             | 0.290098           | -3.44711                     | T down vs N                            | 41.843  | 14.3442   | 5.48494    | 1         |
| cg25271063                                                                   | FCRL6                   | 0.00016622        | 0.000166219          | 0.235775           | -4.24133                     | T down vs N                            | 23.832  | 19.5534   | 13.1274    | 1         |
| cg25273160                                                                   | LRRCS5                  | 6.22E-05          | 6.22E-05             | 0.266071           | -3.75839                     | T down vs N                            | 28.865  | 16.4184   | 9.10083    | 1         |
| cg25273602                                                                   | YTHDF2                  | 0.00333256        | 0.00333256           | 3.21255            | 3.21255                      | T up vs N                              | 11.864  | 12.7571   | 17.2043    | 1         |
| cg25278144                                                                   | TBC1D16                 | 3.12E-06          | 3.12E-06             | 0.160467           | -6.23182                     | T down vs N                            | 48.678  | 31.355    | 10.306     | 1         |
| cg25278343                                                                   | ITGB7                   | 2.84E-05          | 2.84E-05             | 0.230729           | -4.33409                     | T down vs N                            | 33.359  | 20.1434   | 9.66154    | 1         |
| cg25279294                                                                   | OR4D1                   | 0.00050295        | 0.000502945          | 0.319116           | -3.13366                     | T down vs N                            | 18.866  | 12.2193   | 10.3629    | 1         |
| cg25279555                                                                   | DOK6                    | 0.00015689        | 0.000156891          | 0.275501           | -3.62975                     | T down vs N                            | 24.111  | 15.5661   | 10.3296    | 1         |
| cg25279739                                                                   | MEGF6                   | 0.00018709        | 0.000187089          | 0.241623           | -4.13869                     | T down vs N                            | 23.268  | 18.896    | 12.9938    | 1         |
| cg25280720                                                                   | OR6P1                   | 0.00011506        | 0.000115064          | 0.199098           | -5.02265                     | T down vs N                            | 25.643  | 24.3975   | 15.2227    | 1         |
| cg25281584                                                                   | AGBL4                   | 2.58E-05          | 2.58E-05             | 0.22094            | -4.52612                     | T down vs N                            | 33.933  | 21.352    | 10.0678    | 1         |
| cg25282951                                                                   | KIAA1026;KIAA1026       | 0.00174889        | 0.00174889           | 0.243174           | -4.11228                     | T down vs N                            | 14.06   | 18.7261   | 21.3096    | 1         |
| cg25284397                                                                   | CDK6;CDK6               | 0.00384099        | 0.00384099           | 5.80738            | 5.80738                      | T up vs N                              | 11.405  | 28.9839   | 40.661     | 1         |
| cg25285646                                                                   | MICA                    | 0.00025556        | 0.000255556          | 0.19387            | -5.1581                      | T down vs N                            | 21.819  | 25.2087   | 18.4856    | 1         |
| cg25286012                                                                   | S100A9                  | 0.00072613        | 0.000726128          | 0.29121            | -3.43394                     | T down vs N                            | 17.369  | 14.2557   | 13.1323    | 1         |
| cg25286393                                                                   | NAPSA                   | 1.73E-05          | 1.73E-05             | 0.211888           | -4.71948                     | T down vs N                            | 36.435  | 22.5516   | 9.90337    | 1         |
| SLC26A5;SLC26A5;SLC26A5;SLC26A5;SLC26A5                                      |                         |                   |                      |                    |                              |                                        |         |           |            |           |
| cg25288897                                                                   | LC26A5                  | 5.39E-06          | 5.39E-06             | 7.01341            | 7.01341                      | T up vs N                              | 44.477  | 35.5354   | 12.7835    | 1         |
| cg25290307                                                                   | EMID2                   | 3.09E-06          | 3.09E-06             | 5.95008            | 5.95008                      | T up vs N                              | 48.746  | 29.7894   | 9.77776    | 1         |

| Probeset ID | UCSC_REFGENE_NAME                                                                       | p-value<br>(Type) | p-value (T vs.<br>N) | Ratio (T<br>vs. N) | Fold-<br>Change (T<br>vs. N) | Fold-Change (T vs.<br>N) (Description) | F(Type) | SS (Type) | SS (Error) | F (Error) |
|-------------|-----------------------------------------------------------------------------------------|-------------------|----------------------|--------------------|------------------------------|----------------------------------------|---------|-----------|------------|-----------|
| cg25291026  | OR8U8;OR5M1                                                                             | 6.27E-08          | 6.27E-08             | 0.135933           | -7.35656                     | T down vs N                            | 88.72   | 37.2997   | 6.72669    | 1         |
| cg25292638  | ZADH2                                                                                   | 6.51E-05          | 6.51E-05             | 0.26322            | -3.7991                      | T down vs N                            | 28.618  | 16.6867   | 9.32936    | 1         |
| cg25298161  | LTk;LTk;LTk                                                                             | 7.72E-05          | 7.72E-05             | 0.292618           | -3.41742                     | T down vs N                            | 27.708  | 14.1444   | 8.16782    | 1         |
| cg25298683  | EMID2                                                                                   | 0.00131662        | 0.00131662           | 0.165655           | -6.03664                     | T down vs N                            | 15.088  | 30.2738   | 32.1043    | 1         |
| cg25301767  | C1QL4                                                                                   | 0.00049813        | 0.000498134          | 0.327708           | -3.0515                      | T down vs N                            | 18.906  | 11.6575   | 9.86542    | 1         |
| cg25302015  | CRLF1                                                                                   | 3.15E-05          | 3.15E-05             | 0.197122           | -5.073                       | T down vs N                            | 32.744  | 24.7      | 12.0694    | 1         |
| cg25305174  | CAMK2B;CAMK2B;CAMK2B;CAMK2B;                                                            | 0.00175215        | 0.00175215           | 6.35365            | 6.35365                      | T up vs N                              | 14.054  | 32.0221   | 36.4571    | 1         |
| cg25306006  | FOLR2;FOLR2;FOLR2;FOLR2                                                                 | 1.16E-07          | 1.16E-07             | 0.302969           | -3.30067                     | T down vs N                            | 81.104  | 13.3556   | 2.63476    | 1         |
| cg25306859  | CCDC108;CCDC108                                                                         | 0.00055051        | 0.000550512          | 0.315251           | -3.17208                     | T down vs N                            | 18.491  | 12.4814   | 10.7999    | 1         |
| cg25307641  | SURF2;SURF1                                                                             | 2.28E-05          | 2.28E-05             | 0.307608           | -3.25089                     | T down vs N                            | 34.688  | 13.0178   | 6.00456    | 1         |
| cg25309493  | NGEF                                                                                    | 8.51E-05          | 8.51E-05             | 0.261372           | -3.82596                     | T down vs N                            | 27.19   | 16.8633   | 9.92318    | 1         |
| cg25310592  | ORS2A1                                                                                  | 3.27E-05          | 3.27E-05             | 0.233283           | -4.28664                     | T down vs N                            | 32.515  | 19.8421   | 9.76395    | 1         |
| cg25310617  | ZNF776                                                                                  | 0.00209862        | 0.00209862           | 0.328966           | -3.03983                     | T down vs N                            | 13.42   | 11.5775   | 13.8031    | 1         |
| cg25313172  | KRT7                                                                                    | 1.55E-05          | 1.55E-05             | 20.7162            | 20.7162                      | T up vs N                              | 37.143  | 86.0418   | 37.0646    | 1         |
| cg25314624  | CEP55;CEP55                                                                             | 5.15E-05          | 5.15E-05             | 0.280235           | -3.56843                     | T down vs N                            | 29.913  | 15.1573   | 8.10748    | 1         |
| cg25315493  | ABCF1;ABCF1                                                                             | 0.00029759        | 0.000297593          | 0.248772           | -4.01975                     | T down vs N                            | 21.133  | 18.1281   | 13.7253    | 1         |
| cg25316429  | EMX2OS                                                                                  | 0.00020725        | 0.000207253          | 0.166298           | -6.01332                     | T down vs N                            | 22.786  | 30.1436   | 21.1665    | 1         |
| cg25318211  | MICAL1;MICAL1                                                                           | 0.00579524        | 0.00579524           | 0.251675           | -3.97338                     | T down vs N                            | 10.124  | 17.827    | 28.1745    | 1         |
| cg25320328  | GFI1;GFI1                                                                               | 0.00347063        | 0.00347063           | 0.327662           | -3.05192                     | T down vs N                            | 11.732  | 11.6604   | 15.9024    | 1         |
| cg25320749  | GPX5;GPX5                                                                               | 4.40E-05          | 4.40E-05             | 0.16974            | -5.89138                     | T down vs N                            | 30.795  | 29.4591   | 15.3059    | 1         |
| cg25321462  | MS4A13;MS4A13                                                                           | 5.00E-08          | 5.00E-08             | 0.134139           | -7.45493                     | T down vs N                            | 91.697  | 37.7979   | 6.5953     | 1         |
| cg25322008  | ORS1E2                                                                                  | 3.22E-06          | 3.22E-06             | 0.24813            | -4.03015                     | T down vs N                            | 48.435  | 18.1955   | 6.01078    | 1         |
| cg25325322  | C2orf89                                                                                 | 0.00085519        | 0.000855187          | 0.331485           | -3.01673                     | T down vs N                            | 16.724  | 11.4192   | 10.9249    | 1         |
| cg25329685  | ENTPD4;ENTPD4                                                                           | 0.0001364         | 0.000136398          | 0.276724           | -3.61371                     | T down vs N                            | 24.795  | 15.4592   | 9.97558    | 1         |
| cg25329734  | RGS9;RGS9;RGS9                                                                          | 6.71E-06          | 6.71E-06             | 0.289854           | -3.45001                     | T down vs N                            | 42.879  | 14.3637   | 5.35973    | 1         |
| cg25330232  | FABP5                                                                                   | 3.12E-05          | 3.12E-05             | 13.3185            | 13.3185                      | T up vs N                              | 32.789  | 62.7881   | 30.6383    | 1         |
| cg25330243  | GRHL2                                                                                   | 0.00011243        | 0.000112427          | 4.00515            | 4.00515                      | T up vs N                              | 25.76   | 18.0334   | 11.2007    | 1         |
| cg25338454  | ITPR2                                                                                   | 0.00033051        | 0.000330511          | 0.309176           | -3.2344                      | T down vs N                            | 20.667  | 12.9057   | 9.9913     | 1         |
| cg25339449  | MIR509-3;MIR509-1;MIR509-2;MIR509-3                                                     | 8.33E-05          | 8.33E-05             | 0.276464           | -3.61711                     | T down vs N                            | 27.306  | 15.4819   | 9.07181    | 1         |
| cg25340688  | MIR886                                                                                  | 0.00093883        | 0.000938834          | 3.31035            | 3.31035                      | T up vs N                              | 16.362  | 13.4211   | 13.1239    | 1         |
| cg25341923  | KRTAP4-7                                                                                | 3.84E-05          | 3.84E-05             | 0.281502           | -3.55238                     | T down vs N                            | 31.573  | 15.0501   | 7.62687    | 1         |
| cg25341925  | NPPA                                                                                    | 0.0003267         | 0.000326701          | 0.276245           | -3.61997                     | T down vs N                            | 20.718  | 15.501    | 11.9709    | 1         |
| cg25343227  | LOC339674                                                                               | 8.08E-06          | 8.08E-06             | 3.71613            | 3.71613                      | T up vs N                              | 41.554  | 16.1392   | 6.21426    | 1         |
| cg25344406  | FRMD4A                                                                                  | 0.00014382        | 0.000143816          | 0.166065           | -6.02175                     | T down vs N                            | 24.535  | 30.1907   | 19.6883    | 1         |
| cg25344503  | PPYR1                                                                                   | 0.00014652        | 0.000146522          | 20.927             | 20.927                       | T up vs N                              | 24.444  | 86.6176   | 56.6967    | 1         |
| cg25344623  | LCT                                                                                     | 0.00205827        | 0.00205827           | 0.30461            | -3.28289                     | T down vs N                            | 13.488  | 13.235    | 15.7002    | 1         |
| cg25349610  | C15orf27                                                                                | 0.000151          | 0.000150998          | 0.282356           | -3.54163                     | T down vs N                            | 24.297  | 14.9782   | 9.86337    | 1         |
| cg25349729  | PTPN14                                                                                  | 0.00069134        | 0.000691342          | 0.185715           | -5.3846                      | T down vs N                            | 17.565  | 26.5467   | 24.1818    | 1         |
| cg25349900  | NDUF8                                                                                   | 0.00077301        | 0.000773014          | 0.330184           | -3.02862                     | T down vs N                            | 17.121  | 11.5007   | 10.748     | 1         |
| cg25350065  | ZNF251                                                                                  | 5.03E-05          | 5.03E-05             | 0.213697           | -4.67952                     | T down vs N                            | 30.037  | 22.3051   | 11.8816    | 1         |
| cg25351550  | KSR2                                                                                    | 6.02E-05          | 6.02E-05             | 0.155088           | -6.44793                     | T down vs N                            | 29.044  | 32.5343   | 17.9227    | 1         |
| cg25351599  | NCRNA00051                                                                              | 1.30E-05          | 1.30E-05             | 0.331115           | -3.0201                      | T down vs N                            | 38.317  | 11.4423   | 4.77796    | 1         |
| cg25352134  | ZNF681                                                                                  | 0.00323169        | 0.00323169           | 0.314562           | -3.17902                     | T down vs N                            | 11.965  | 12.5287   | 16.7545    | 1         |
| cg25352836  | TSSK6;TSSK6                                                                             | 0.00147959        | 0.00147959           | 6.47282            | 6.47282                      | T up vs N                              | 14.661  | 32.6689   | 35.6531    | 1         |
| cg25353142  | KCNS1                                                                                   | 1.80E-05          | 1.80E-05             | 3.96834            | 3.96834                      | T up vs N                              | 36.168  | 17.7943   | 7.8718     | 1         |
| cg25353450  | PCDHGA4;PCDHGA6;PCDHGA9;PCDHGA1;PCDHGA8;PCDHGA10;PCDHGA5;PCDHGB1;PCDHGA10;PCDHGB4;PCDHG | 0.00129713        | 0.00129713           | 5.07551            | 5.07551                      | T up vs N                              | 15.143  | 24.7151   | 26.1142    | 1         |
| cg25354926  | CPLX1                                                                                   | 0.00211428        | 0.00211428           | 0.118676           | -8.42631                     | T down vs N                            | 13.395  | 42.5476   | 50.824     | 1         |
| cg25355213  | UNK                                                                                     | 0.00031401        | 0.000314011          | 0.325162           | -3.07539                     | T down vs N                            | 20.894  | 11.821    | 9.05239    | 1         |
| cg25356639  | FOXP1;FOXP1                                                                             | 0.00126287        | 0.00126287           | 0.33101            | -3.02106                     | T down vs N                            | 15.242  | 11.4489   | 12.0184    | 1         |
| cg25356719  | ADARB2                                                                                  | 0.00076307        | 0.000763069          | 0.277021           | -3.60983                     | T down vs N                            | 17.172  | 15.4334   | 14.3804    | 1         |
| cg25358415  | PPP1R11                                                                                 | 0.00203287        | 0.00203287           | 0.279147           | -3.58234                     | T down vs N                            | 13.531  | 15.2501   | 18.033     | 1         |
| cg25360385  | GALNT6                                                                                  | 0.00043696        | 0.000436957          | 4.14557            | 4.14557                      | T up vs N                              | 19.459  | 18.9402   | 15.5736    | 1         |
| cg25362050  | RARA                                                                                    | 0.00014365        | 0.000143651          | 0.316822           | -3.15634                     | T down vs N                            | 24.541  | 12.3741   | 8.06768    | 1         |
| cg25363336  | MYO10                                                                                   | 0.00041382        | 0.000413816          | 4.99443            | 4.99443                      | T up vs N                              | 19.691  | 24.2275   | 19.6863    | 1         |
| cg25363808  | OAZ3;MRPL9                                                                              | 0.00256968        | 0.00256968           | 0.236663           | -4.22542                     | T down vs N                            | 12.727  | 19.4518   | 24.454     | 1         |
| cg25365990  | LDB3;LDB3;LDB3                                                                          | 0.00168921        | 0.00168921           | 0.218387           | -4.57902                     | T down vs N                            | 14.184  | 21.6819   | 24.4582    | 1         |
| cg25367249  | NTN4                                                                                    | 1.18E-05          | 1.18E-05             | 0.281927           | -3.54701                     | T down vs N                            | 38.952  | 15.0142   | 6.16734    | 1         |
| cg25367691  | TLR3;TLR3                                                                               | 0.00523601        | 0.00523601           | 0.281169           | -3.55658                     | T down vs N                            | 10.433  | 15.0781   | 23.123     | 1         |
| cg25368917  | FAM101A                                                                                 | 0.00077499        | 0.000774991          | 0.122652           | -8.15312                     | T down vs N                            | 17.11   | 41.2419   | 38.5655    | 1         |
| cg25369262  | TSPAN1                                                                                  | 0.00100021        | 0.00100021           | 0.201651           | -4.95905                     | T down vs N                            | 16.119  | 24.0138   | 23.8359    | 1         |
| cg25370836  | NOTCH4                                                                                  | 0.00044162        | 0.000441616          | 0.259858           | -3.84826                     | T down vs N                            | 19.414  | 17.0097   | 14.0188    | 1         |
| cg25372195  | DCD                                                                                     | 0.00116957        | 0.00116957           | 0.322575           | -3.10005                     | T down vs N                            | 15.528  | 11.9897   | 12.3544    | 1         |
| cg25374714  | SVOP                                                                                    | 1.13E-05          | 1.13E-05             | 0.191059           | -5.23399                     | T down vs N                            | 39.212  | 25.6596   | 10.4701    | 1         |
| cg25375860  | SGPP2                                                                                   | 0.00013995        | 0.000139952          | 3.43276            | 3.43276                      | T up vs N                              | 24.669  | 14.2477   | 9.24098    | 1         |
| cg25379390  | SNX15;SNX15                                                                             | 5.41E-06          | 5.41E-06             | 0.110047           | -9.087                       | T down vs N                            | 44.458  | 45.6147   | 16.4164    | 1         |
| cg25379954  | PROX1                                                                                   | 3.86E-05          | 3.86E-05             | 0.265151           | -3.77144                     | T down vs N                            | 31.55   | 16.5045   | 8.37004    | 1         |

| Probeset ID | UCSC_REFGENE_NAME               | p-value<br>(Type) | p-value (T vs.<br>N) | Ratio (T<br>vs. N) | Fold-<br>Change (T<br>vs. N) | Fold-Change (T vs.<br>N) (Description) | F(Type) | SS (Type) | SS (Error) | F (Error) |
|-------------|---------------------------------|-------------------|----------------------|--------------------|------------------------------|----------------------------------------|---------|-----------|------------|-----------|
|             | FRMPD2;FRMPD2;FRMPD2L1;FRMPD2   |                   |                      |                    |                              |                                        |         |           |            |           |
| cg25380207  | ;FRMPD2;FRMPD2;FRMPD2L1         | 6.97E-05          | 6.97E-05             | 0.332942           | -3.00352                     | T down vs N                            | 28.254  | 11.3286   | 6.41538    | 1         |
| cg25382352  | ATP8B3                          | 1.25E-05          | 1.25E-05             | 0.314408           | -3.18058                     | T down vs N                            | 38.549  | 12.5394   | 5.20459    | 1         |
| cg25382900  | TNFRSF8                         | 0.00028074        | 0.000280737          | 0.264507           | -3.78061                     | T down vs N                            | 21.394  | 16.565    | 12.3886    | 1         |
| cg25383309  | ARMC3                           | 0.00081033        | 0.000810328          | 0.246213           | -4.06152                     | T down vs N                            | 16.935  | 18.3986   | 17.383     | 1         |
| cg25383479  | RNZE1                           | 1.65E-06          | 1.65E-06             | 0.201796           | -4.9555                      | T down vs N                            | 53.953  | 23.9923   | 7.11505    | 1         |
| cg25383699  | COL21A1                         | 6.64E-05          | 6.64E-05             | 10.0616            | 10.0616                      | T up vs N                              | 28.515  | 49.9235   | 28.012     | 1         |
| cg25384595  | LILRA1;LILRA1                   | 4.60E-06          | 4.60E-06             | 0.235924           | -4.23865                     | T down vs N                            | 45.666  | 19.5363   | 6.84491    | 1         |
| cg25386707  | EBF3                            | 9.04E-06          | 9.04E-06             | 0.159083           | -6.28604                     | T down vs N                            | 40.77   | 31.6526   | 12.4219    | 1         |
| cg25388528  | KRTAP20-1                       | 0.00191524        | 0.00191524           | 0.275414           | -3.6309                      | T down vs N                            | 13.739  | 15.5737   | 18.1362    | 1         |
| cg25391023  | BTNL2                           | 0.00544941        | 0.00544941           | 0.24899            | -4.01622                     | T down vs N                            | 10.311  | 18.1052   | 28.0947    | 1         |
| cg25391162  | FOXD4                           | 4.06E-05          | 4.06E-05             | 3.22876            | 3.22876                      | T up vs N                              | 31.26   | 12.8674   | 6.58599    | 1         |
| cg25393494  | PLD6                            | 0.00606543        | 0.00606543           | 0.302826           | -3.30223                     | T down vs N                            | 9.9862  | 13.3661   | 21.4154    | 1         |
| cg25395188  | VPS37C                          | 2.07E-05          | 2.07E-05             | 0.272638           | -3.66787                     | T down vs N                            | 35.3    | 15.8193   | 7.17025    | 1         |
| cg25396728  | IQSEC3;IQSEC3                   | 0.00014355        | 0.000143553          | 5.67646            | 5.67646                      | T up vs N                              | 24.544  | 28.2374   | 18.4077    | 1         |
| cg25401210  | ADAP1                           | 0.00017578        | 0.000175777          | 0.142564           | -7.01439                     | T down vs N                            | 23.564  | 35.5405   | 24.1317    | 1         |
| cg25407876  | DNAJC9                          | 0.00015167        | 0.000151665          | 0.320037           | -3.12464                     | T down vs N                            | 24.276  | 12.1577   | 8.01314    | 1         |
| cg25407979  | PLEKHA6                         | 0.00377697        | 0.00377697           | 6.03596            | 6.03596                      | T up vs N                              | 11.459  | 30.2701   | 4.22656    | 1         |
| cg25408620  | CHCHD2                          | 6.32E-05          | 6.32E-05             | 0.317041           | -3.15416                     | T down vs N                            | 28.778  | 12.3593   | 6.87158    | 1         |
| cg25408950  | NEK7                            | 9.11E-05          | 9.11E-05             | 0.258913           | -3.8623                      | T down vs N                            | 26.836  | 17.1018   | 10.1962    | 1         |
| cg25411902  | ISM1                            | 0.00196573        | 0.00196573           | 0.322785           | -3.09804                     | T down vs N                            | 13.648  | 11.9759   | 14.0396    | 1         |
| cg25412448  | PACRG;PACRG;PACRG               | 0.00451471        | 0.00451471           | 4.09455            | 4.09455                      | T up vs N                              | 10.893  | 18.6118   | 27.3371    | 1         |
| cg25413843  | VAX2                            | 0.00142145        | 0.00142145           | 0.270431           | -3.69781                     | T down vs N                            | 14.807  | 16.0179   | 17.3087    | 1         |
| cg25414165  | C10orf11                        | 0.00205574        | 0.00205574           | 0.233698           | -4.27902                     | T down vs N                            | 13.492  | 19.7937   | 23.4731    | 1         |
| cg25416014  | MCF2L2                          | 0.00646066        | 0.00646066           | 3.05478            | 3.05478                      | T up vs N                              | 9.7969  | 11.68     | 19.0754    | 1         |
| cg25416125  | DGKA;DGKA;DGKA;DGKA             | 0.00367705        | 0.00367705           | 3.42162            | 3.42162                      | T up vs N                              | 11.545  | 14.1727   | 19.6414    | 1         |
| cg25417529  | KANK2;KANK2                     | 3.96E-05          | 3.96E-05             | 0.306466           | -3.26301                     | T down vs N                            | 31.401  | 13.1001   | 6.67507    | 1         |
| cg25417842  | AGAP3                           | 0.00019481        | 0.000194808          | 4.13684            | 4.13684                      | T up vs N                              | 23.077  | 18.8841   | 13.0932    | 1         |
| cg25420238  | P2RY10;P2RY10                   | 0.00027953        | 0.000279532          | 0.215094           | -6.44912                     | T down vs N                            | 21.413  | 22.1171   | 16.526     | 1         |
| cg25420482  | NFKBIL1;NFKBIL1;NFKBIL1;NFKBIL1 | 0.0001682         | 0.000168198          | 0.226366           | -4.41763                     | T down vs N                            | 23.775  | 20.6713   | 13.9111    | 1         |
| cg25420614  | WFIKN2                          | 0.00074273        | 0.000742726          | 0.268787           | -3.72041                     | T down vs N                            | 17.279  | 16.1675   | 14.971     | 1         |
| cg25420839  | HIBADH                          | 0.00021818        | 0.000218176          | 0.221566           | -4.51334                     | T down vs N                            | 22.546  | 21.272    | 15.0956    | 1         |
| cg254242029 | COL4A1                          | 0.00014563        | 0.000145629          | 0.208489           | -4.79641                     | T down vs N                            | 24.474  | 23.024    | 15.0523    | 1         |
| cg25424194  | CYP2A7;CYP2A7;CYP2A7;CYP2A7     | 0.00046898        | 0.000468984          | 0.323821           | -3.08813                     | T down vs N                            | 19.159  | 11.9082   | 9.94449    | 1         |
| cg25426743  | HOXA3                           | 0.00327139        | 0.00327139           | 3.41617            | 3.41617                      | T up vs N                              | 11.925  | 14.136    | 18.9671    | 1         |
| cg25426867  | SVIL;MIR938;SVIL                | 6.65E-07          | 6.65E-07             | 0.221909           | -4.50635                     | T down vs N                            | 62.223  | 21.2283   | 5.45866    | 1         |
| cg25427625  | KIAA1908;KIAA1908;KIAA1908      | 0.00056709        | 0.000567087          | 0.270055           | -3.70296                     | T down vs N                            | 18.369  | 16.052    | 13.9818    | 1         |
| cg25429150  | ATP6V1B1                        | 6.26E-06          | 6.26E-06             | 0.152185           | -6.57093                     | T down vs N                            | 43.379  | 33.1974   | 12.2447    | 1         |
| cg25432336  | RHOB;RHOB                       | 0.00042342        | 0.00042342           | 4.27104            | 4.27104                      | T up vs N                              | 19.593  | 19.7428   | 16.1225    | 1         |
| cg25433666  | SIGLEC6;SIGLEC6;SIGLEC6         | 8.69E-05          | 8.69E-05             | 0.289491           | -3.45433                     | T down vs N                            | 27.083  | 14.3928   | 8.5028     | 1         |
| cg25437259  | NUDT16                          | 0.00021755        | 0.000217545          | 3.78637            | 3.78637                      | T up vs N                              | 22.56   | 16.6029   | 11.7751    | 1         |
| cg25439951  | UNC5A                           | 0.00698555        | 0.00698555           | 0.227481           | -4.39597                     | T down vs N                            | 9.5649  | 20.5347   | 34.35      | 1         |
| cg25442239  | INTU                            | 4.28E-05          | 4.28E-05             | 0.323333           | -3.09279                     | T down vs N                            | 30.958  | 11.94     | 6.171      | 1         |
| cg25444386  | KDR                             | 0.00014144        | 0.000141443          | 8.64293            | 8.64293                      | T up vs N                              | 24.617  | 43.567    | 28.3171    | 1         |
| cg25448355  | COL14A1                         | 0.00057981        | 0.000579813          | 0.224376           | -4.45681                     | T down vs N                            | 18.278  | 20.9177   | 18.3109    | 1         |
| cg25448861  | SRRM4                           | 3.14E-05          | 3.14E-05             | 0.162441           | -6.15609                     | T down vs N                            | 32.754  | 30.9373   | 15.1127    | 1         |
| cg25449283  | PIP                             | 2.15E-06          | 2.15E-06             | 0.121266           | -8.24636                     | T down vs N                            | 51.71   | 41.6901   | 12.8997    | 1         |
| cg25449466  | BMP7                            | 1.72E-05          | 1.72E-05             | 0.214784           | -4.65584                     | T down vs N                            | 36.476  | 22.1587   | 9.71978    | 1         |
| cg25451456  | OR56A3                          | 5.58E-05          | 5.58E-05             | 0.172571           | -5.79471                     | T down vs N                            | 29.461  | 28.912    | 15.702     | 1         |
| cg25456959  | ASB12                           | 1.43E-05          | 1.43E-05             | 0.22748            | -4.39599                     | T down vs N                            | 37.687  | 20.5348   | 8.71797    | 1         |
| cg25457200  | DPP8;DPP8;DPP8                  | 0.0007955         | 0.000795503          | 0.309017           | -3.23607                     | T down vs N                            | 17.007  | 12.9171   | 12.152     | 1         |
| cg25457815  | ATP11A;ATP11A                   | 3.50E-05          | 3.50E-05             | 0.240471           | -4.15851                     | T down vs N                            | 32.11   | 19.0233   | 9.4791     | 1         |
| cg25458083  | KCNG2                           | 7.98E-05          | 7.98E-05             | 0.229886           | -4.34998                     | T down vs N                            | 27.533  | 20.244    | 11.7642    | 1         |
| cg25458175  | ZBTB45                          | 8.08E-05          | 8.08E-05             | 34.4945            | 34.4945                      | T up vs N                              | 27.465  | 117.426   | 68.4087    | 1         |
| cg25458520  | MAPK13                          | 1.93E-05          | 1.93E-05             | 3.87828            | 3.87828                      | T up vs N                              | 35.735  | 17.2064   | 7.70394    | 1         |
| cg25460031  | HIF3A;HIF3A;HIF3A               | 4.38E-05          | 4.38E-05             | 0.269595           | -3.70927                     | T down vs N                            | 30.818  | 16.0938   | 8.35551    | 1         |
| cg25461508  | RGS14                           | 7.42E-06          | 7.42E-06             | 0.243614           | -4.10486                     | T down vs N                            | 42.155  | 18.6782   | 7.08938    | 1         |
| cg25464787  | PYHIN1;PYHIN1;PYHIN1;PYHIN1     | 0.00023702        | 0.000237024          | 0.190375           | -5.25279                     | T down vs N                            | 22.164  | 25.7708   | 18.6041    | 1         |
| cg25469474  | TNIP2;TNIP2                     | 0.00030014        | 0.000300138          | 0.255567           | -3.91286                     | T down vs N                            | 21.094  | 17.4326   | 13.2225    | 1         |
| cg25469800  | C1orf55                         | 1.95E-07          | 1.95E-07             | 0.178629           | -5.59821                     | T down vs N                            | 75.028  | 27.7877   | 5.92582    | 1         |
| cg25471557  | HSD11B1                         | 2.24E-05          | 2.24E-05             | 0.306407           | -3.26363                     | T down vs N                            | 34.8    | 13.1043   | 6.02496    | 1         |
| cg25472174  | OR8J3                           | 1.37E-05          | 1.37E-05             | 0.209909           | -4.76397                     | T down vs N                            | 37.973  | 22.8251   | 9.61733    | 1         |
| cg25474312  | KRTAP19-6                       | 0.00024047        | 0.000240471          | 0.192719           | -5.18889                     | T down vs N                            | 22.097  | 25.3919   | 18.3856    | 1         |
| cg25474358  | COPB2;COPB2                     | 7.05E-05          | 7.05E-05             | 0.244442           | -4.09095                     | T down vs N                            | 28.194  | 18.5886   | 10.5491    | 1         |
| cg25474399  | MYOM1;MYOM1                     | 0.0014677         | 0.0014677            | 0.272255           | -3.67303                     | T down vs N                            | 14.69   | 15.8536   | 17.2672    | 1         |
| cg25481160  | FOXP1                           | 9.54E-08          | 9.54E-08             | 0.164614           | -6.07481                     | T down vs N                            | 83.424  | 30.4865   | 5.84705    | 1         |
| cg25481705  | KLC3                            | 8.57E-05          | 8.57E-05             | 0.31157            | -3.20955                     | T down vs N                            | 27.158  | 12.7367   | 7.5037     | 1         |
| cg25481999  | C1orf2;C1orf2;C1orf2;C1orf2     | 1.91E-05          | 1.91E-05             | 0.256167           | -3.9037                      | T down vs N                            | 35.804  | 17.3727   | 7.76344    | 1         |
| cg25483003  | ENTPD2;ENTPD2                   | 0.00214149        | 0.00214149           | 3.52033            | 3.52033                      | T up vs N                              | 13.35   | 14.8356   | 17.7803    | 1         |
| cg25484904  | CWH43                           | 0.0005526         | 0.000552596          | 3.12952            | 3.12952                      | T up vs N                              | 18.476  | 12.191    | 10.5576    | 1         |
| cg25485651  | EEA1                            | 1.64E-05          | 1.64E-05             | 0.324349           | -3.0831                      | T down vs N                            | 36.767  | 11.8737   | 5.1672     | 1         |
| cg25486143  | RASSF1;RASSF1                   | 0.00208175        | 0.00208175           | 6.15772            | 6.15772                      | T up vs N                              | 13.448  | 30.9463   | 36.8182    | 1         |

| Probeset ID                                                     | UCSC_REFGENE_NAME            | p-value<br>(Type) | p-value (T vs.<br>N) | Ratio (T<br>vs. N) | Fold-<br>Change (T<br>vs. N) | Fold-Change (T vs.<br>N) (Description) | F(Type) | SS (Type) | SS (Error) | F (Error) |
|-----------------------------------------------------------------|------------------------------|-------------------|----------------------|--------------------|------------------------------|----------------------------------------|---------|-----------|------------|-----------|
| RBM9;RBM9;RBM9;RBM9;RBM9;RBM9                                   |                              |                   |                      |                    |                              |                                        |         |           |            |           |
| cg25488206                                                      | 9;RBM9;RBM9;RBM9;RBM9        | 0.00106043        | 0.00106043           | 0.315957           | -3.16499                     | T down vs N                            | 15.897  | 12.4331   | 12.5138    | 1         |
| cg25490585                                                      | RAB27A                       | 0.00221633        | 0.00221633           | 0.269152           | -3.71538                     | T down vs N                            | 13.232  | 16.1342   | 19.5098    | 1         |
| cg25492112                                                      | C20orf95                     | 8.46E-05          | 8.46E-05             | 0.198996           | -5.02522                     | T down vs N                            | 27.225  | 24.413    | 14.3472    | 1         |
| cg25492645                                                      | GALNT3                       | 0.00150609        | 0.00150609           | 3.22532            | 3.22532                      | T up vs N                              | 14.596  | 12.844    | 14.079     | 1         |
| cg25495024                                                      | STX8                         | 0.00010418        | 0.00010418           | 0.181449           | -5.51118                     | T down vs N                            | 26.147  | 27.2845   | 16.6959    | 1         |
| cg25497487                                                      | CRYBB2                       | 9.25E-05          | 9.25E-05             | 0.235709           | -4.24251                     | T down vs N                            | 26.76   | 19.561    | 11.6955    | 1         |
| cg25499650                                                      | OVCH2                        | 2.96E-05          | 2.96E-05             | 0.295192           | -3.38763                     | T down vs N                            | 33.114  | 13.9436   | 6.73732    | 1         |
| cg25499746                                                      | ATXN1;ATXN1                  | 1.53E-06          | 1.53E-06             | 0.279853           | -3.5733                      | T down vs N                            | 54.587  | 15.1898   | 4.45226    | 1         |
| cg25504749                                                      | PRAP1;PRAP1                  | 0.00020938        | 0.000209376          | 0.294043           | -3.40086                     | T down vs N                            | 22.738  | 14.0328   | 9.87434    | 1         |
| cg25508633                                                      | SNORD105;PPAN-P2RY11;PPAN    | 0.00020242        | 0.000202422          | 0.318237           | -3.14231                     | T down vs N                            | 22.896  | 12.2784   | 8.58018    | 1         |
| cg25509184                                                      | CFTR                         | 9.15E-06          | 9.15E-06             | 5.94317            | 5.94317                      | T up vs N                              | 40.682  | 29.7506   | 11.7008    | 1         |
| cg25509697                                                      | FOXL2;C3orf72                | 1.65E-05          | 1.65E-05             | 0.192802           | -5.18666                     | T down vs N                            | 36.757  | 25.3786   | 11.0472    | 1         |
| cg25511621                                                      | C6orf142                     | 2.27E-05          | 2.27E-05             | 0.194283           | -5.14712                     | T down vs N                            | 34.719  | 25.1432   | 11.5871    | 1         |
| cg25511667                                                      | HLA-DPB1                     | 0.00131509        | 0.00131509           | 5.41532            | 5.41532                      | T up vs N                              | 15.092  | 26.7264   | 28.3343    | 1         |
| cg25514328                                                      | RPTOR;RPTOR                  | 0.00066132        | 0.000661316          | 9.81784            | 9.81784                      | T up vs N                              | 17.743  | 48.8686   | 44.0675    | 1         |
| cg25518132                                                      | LOC100132215                 | 5.32E-05          | 5.32E-05             | 4.93012            | 4.93012                      | T up vs N                              | 29.728  | 23.8386   | 12.8301    | 1         |
| cg25518276                                                      | C11orf85                     | 3.19E-05          | 3.19E-05             | 0.295563           | -3.38337                     | T down vs N                            | 32.671  | 13.9148   | 6.81448    | 1         |
| cg25518712                                                      | ZSCAN18                      | 0.00180902        | 0.00180902           | 0.197713           | -5.05785                     | T down vs N                            | 13.94   | 24.6091   | 28.245     | 1         |
| cg25518868                                                      | DIAPH1;DIAPH1                | 0.00035383        | 0.000353832          | 0.265031           | -3.77314                     | T down vs N                            | 20.368  | 16.5157   | 12.9738    | 1         |
| cg25518968                                                      | C17orf73                     | 6.00E-05          | 6.00E-05             | 0.241101           | -4.14763                     | T down vs N                            | 29.067  | 18.9535   | 10.4332    | 1         |
| cg25520068                                                      | GSTM5                        | 0.002066          | 0.002066             | 4.8029             | 4.8029                       | T up vs N                              | 13.475  | 23.0637   | 27.3862    | 1         |
| cg25520679                                                      | HIC1;HIC1                    | 0.00056322        | 0.000563218          | 3.86078            | 3.86078                      | T up vs N                              | 18.397  | 17.0918   | 14.8648    | 1         |
| cg25522795                                                      | TNXB;TNXB                    | 0.00120582        | 0.00120582           | 0.296344           | -3.37446                     | T down vs N                            | 15.414  | 13.8547   | 14.3817    | 1         |
| cg25527882                                                      | TFEB;TFEB                    | 0.00546296        | 0.00546296           | 3.11752            | 3.11752                      | T up vs N                              | 10.303  | 12.1091   | 18.804     | 1         |
| cg25528786                                                      | CEACAM21;CEACAM21            | 0.00025423        | 0.000254229          | 0.248575           | -4.02292                     | T down vs N                            | 21.843  | 18.1487   | 13.294     | 1         |
| cg25530944                                                      | LOC286467                    | 0.00675674        | 0.00675674           | 0.325447           | -3.0727                      | T down vs N                            | 9.6635  | 11.8026   | 19.5417    | 1         |
| cg25531987                                                      | CCL23;CCL23                  | 0.00496586        | 0.00496586           | 0.308153           | -3.24514                     | T down vs N                            | 10.597  | 12.9787   | 19.5967    | 1         |
| cg25532314                                                      | OR5B3                        | 0.00050346        | 0.000503457          | 0.273524           | -3.65599                     | T down vs N                            | 18.862  | 15.7404   | 13.3521    | 1         |
| cg25535316                                                      | PHRF1                        | 0.00068912        | 0.000689117          | 0.324021           | -3.08622                     | T down vs N                            | 17.578  | 11.8951   | 10.8275    | 1         |
| cg25538627                                                      | USP2;USP2                    | 0.0010764         | 0.0010764            | 8.76168            | 8.76168                      | T up vs N                              | 15.84   | 44.1201   | 44.5651    | 1         |
| cg25540026                                                      | PDE4C;PDE4C;PDE4C            | 0.00476612        | 0.00476612           | 0.268834           | -3.71977                     | T down vs N                            | 10.724  | 16.1633   | 24.1153    | 1         |
| cg25541078                                                      | C1QL1                        | 0.00087152        | 0.000871516          | 0.272947           | -3.66371                     | T down vs N                            | 16.65   | 15.7917   | 15.1749    | 1         |
| cg25541968                                                      | OR5P3                        | 0.00012359        | 0.000123585          | 0.141389           | -7.07268                     | T down vs N                            | 25.285  | 35.8431   | 22.6811    | 1         |
| cg25544075                                                      | TTL10                        | 0.00060622        | 0.000606224          | 5.29723            | 5.29723                      | T up vs N                              | 18.096  | 26.0332   | 23.0182    | 1         |
| cg25544164                                                      | NRTN;NRTN                    | 0.00144891        | 0.00144891           | 0.116635           | -8.57376                     | T down vs N                            | 14.737  | 43.243    | 46.9491    | 1         |
| cg25545500                                                      | OR8K1                        | 3.57E-06          | 3.57E-06             | 0.172962           | -5.7816                      | T down vs N                            | 47.616  | 28.8375   | 9.68995    | 1         |
| C21orf56;C21orf56;C21orf56;C21orf56                             |                              |                   |                      |                    |                              |                                        |         |           |            |           |
| cg25545878                                                      | 6                            | 0.00514775        | 0.00514775           | 0.294366           | -3.39713                     | T down vs N                            | 10.486  | 14.0076   | 21.3742    | 1         |
| cg25546118                                                      | PSG8;PSG8                    | 6.79E-06          | 6.79E-06             | 0.172229           | -5.80622                     | T down vs N                            | 42.796  | 28.9774   | 10.8336    | 1         |
| cg25546539                                                      | TPP1                         | 0.0019802         | 0.0019802            | 0.314601           | -3.17863                     | T down vs N                            | 13.623  | 12.5261   | 14.7123    | 1         |
| cg25547520                                                      | SMAD3;SMAD3;SMAD3            | 2.51E-05          | 2.51E-05             | 0.220505           | -4.53505                     | T down vs N                            | 34.109  | 21.4078   | 10.0421    | 1         |
| cg25555059                                                      | SLC27A6;SLC27A6;SLC27A6      | 0.00255765        | 0.00255765           | 4.80376            | 4.80376                      | T up vs N                              | 12.743  | 23.069    | 28.9653    | 1         |
| cg25561576                                                      | GSTCD;GSTCD                  | 0.00015564        | 0.000155639          | 0.326463           | -3.06313                     | T down vs N                            | 24.15   | 11.7371   | 7.77618    | 1         |
| cg25562106                                                      | C6orf72                      | 0.00030665        | 0.000306651          | 0.312587           | -3.19911                     | T down vs N                            | 20.999  | 12.6656   | 9.6505     | 1         |
| cg25564800                                                      | KPNA1;KPNA1                  | 1.00E-05          | 1.00E-05             | 0.208451           | -4.7973                      | T down vs N                            | 40.047  | 23.0294   | 9.20105    | 1         |
| cg25565082                                                      | CARD14                       | 9.30E-06          | 9.30E-06             | 0.332361           | -3.00877                     | T down vs N                            | 40.571  | 11.3646   | 4.48189    | 1         |
| cg25565850                                                      | OBSL1                        | 0.00250952        | 0.00250952           | 0.297056           | -3.36637                     | T down vs N                            | 12.807  | 13.8001   | 17.2403    | 1         |
| cg25566909                                                      | TBC1D28                      | 1.59E-05          | 1.59E-05             | 0.278217           | -3.59431                     | T down vs N                            | 36.995  | 15.33     | 6.63006    | 1         |
| cg25567805                                                      | LAMA4;LAMA4;LAMA4            | 0.00120418        | 0.00120418           | 0.228567           | -4.37508                     | T down vs N                            | 15.419  | 20.4028   | 21.1719    | 1         |
| C10orf2;MRPL43;MRPL43;MRPL43;C10orf2;C10orf2;C10orf2;MRPL43     |                              |                   |                      |                    |                              |                                        |         |           |            |           |
| cg25580076                                                      | 0orf2;C10orf2;C10orf2;MRPL43 | 2.51E-05          | 2.51E-05             | 0.101515           | -9.85079                     | T down vs N                            | 34.109  | 49.0121   | 22.9907    | 1         |
| cg25580782                                                      | IL15RA;IL15RA                | 5.69E-05          | 5.69E-05             | 0.204025           | -4.90135                     | T down vs N                            | 29.356  | 23.664    | 12.8977    | 1         |
| cg25587069                                                      | SPARC;SPARC                  | 2.07E-05          | 2.07E-05             | 0.101282           | -9.8734                      | T down vs N                            | 35.293  | 49.1104   | 22.2643    | 1         |
| cg25588792                                                      | LAIR2;LAIR2                  | 0.00033274        | 0.000332744          | 0.098313           | -10.1716                     | T down vs N                            | 20.638  | 50.395    | 39.0707    | 1         |
| cg25588844                                                      | TAF1B                        | 1.10E-05          | 1.10E-05             | 0.210481           | -4.75102                     | T down vs N                            | 39.429  | 22.7456   | 9.22996    | 1         |
| cg25588852                                                      | MREG                         | 0.00060565        | 0.000605645          | 0.197758           | -5.05669                     | T down vs N                            | 18.1    | 24.6022   | 21.7482    | 1         |
| cg25590114                                                      | HCCA2                        | 3.30E-05          | 3.30E-05             | 0.1115             | -8.96861                     | T down vs N                            | 32.463  | 45.0742   | 22.216     | 1         |
| cg25592413                                                      | STC2                         | 0.0002599         | 0.000259896          | 0.250296           | -3.99527                     | T down vs N                            | 21.743  | 17.9693   | 13.2233    | 1         |
| cg25592907                                                      | DNAJB13                      | 1.40E-05          | 1.40E-05             | 0.252812           | -3.9555                      | T down vs N                            | 37.807  | 17.7107   | 7.49514    | 1         |
| cg25593510                                                      | GSTM5                        | 6.08E-05          | 6.08E-05             | 5.26222            | 5.26222                      | T up vs N                              | 28.996  | 25.8266   | 14.2513    | 1         |
| cg25594165                                                      | NRG3;NRG3;NRG3               | 0.00012118        | 0.000121181          | 0.331767           | -3.01416                     | T down vs N                            | 25.383  | 11.4016   | 7.18688    | 1         |
| SNHG3-RCC1;RCC1;SNHG3-RCC1;RCC1;SNHG3-RCC1;RCC1;SNHG3-RCC1;RCC1 |                              |                   |                      |                    |                              |                                        |         |           |            |           |
| cg25596287                                                      | RCC1;RCC1;SNHG3-RCC1;RCC1    | 0.00017552        | 0.000175515          | 0.199042           | -5.02407                     | T down vs N                            | 23.571  | 24.4061   | 16.5666    | 1         |
| cg25597580                                                      | KIRREL                       | 1.10E-05          | 1.10E-05             | 0.238912           | -4.18564                     | T down vs N                            | 39.42   | 19.1973   | 7.79195    | 1         |
| cg25597894                                                      | IGSF21                       | 0.00015579        | 0.000155794          | 43.6044            | 43.6044                      | T up vs N                              | 24.145  | 133.485   | 88.4553    | 1         |
| cg25598319                                                      | SLCO2A1                      | 4.18E-05          | 4.18E-05             | 12.1226            | 12.1226                      | T up vs N                              | 31.086  | 58.3078   | 30.0109    | 1         |
| cg25598400                                                      | KRT32                        | 1.03E-05          | 1.03E-05             | 0.300894           | -3.32343                     | T down vs N                            | 39.844  | 13.5097   | 5.42509    | 1         |
| cg25599902                                                      | C1orf185                     | 0.00058335        | 0.00058335           | 0.220809           | -4.52879                     | T down vs N                            | 18.253  | 21.3687   | 18.7312    | 1         |
| cg25602543                                                      | ZSWIM3                       | 0.00045681        | 0.000456807          | 0.330722           | -3.02369                     | T down vs N                            | 19.27   | 11.4669   | 9.52083    | 1         |
| cg25602651                                                      | DCAF8L1                      | 0.00010763        | 0.000107626          | 0.277586           | -3.60249                     | T down vs N                            | 25.982  | 15.3845   | 9.47409    | 1         |
| cg25603742                                                      | CNTN2                        | 1.65E-05          | 1.65E-05             | 4.46711            | 4.46711                      | T up vs N                              | 36.748  | 20.9824   | 9.13582    | 1         |

| Probeset ID                         | UCSC_REFGENE_NAME             | p-value<br>(Type) | p-value (T vs.<br>N) | Ratio (T<br>vs. N) | Fold-<br>Change (T<br>vs. N) | Fold-Change (T vs.<br>N) (Description) | F(Type) | SS (Type) | SS (Error) | F (Error) |
|-------------------------------------|-------------------------------|-------------------|----------------------|--------------------|------------------------------|----------------------------------------|---------|-----------|------------|-----------|
| cg25605313                          | ANO8                          | 0.0006865         | 0.000686502          | 0.308596           | -3.24048                     | T down vs N                            | 17.593  | 12.9471   | 11.7748    | 1         |
| cg25605754                          | ST7;ST7;ST7OT1;ST7OT4         | 1.45E-08          | 1.45E-08             | 0.108178           | -9.24399                     | T down vs N                            | 109.56  | 46.3256   | 6.76537    | 1         |
| cg25607161                          | OR1A1                         | 0.00189009        | 0.00189009           | 0.326372           | -3.06399                     | T down vs N                            | 13.786  | 11.743    | 13.6291    | 1         |
| cg25609393                          | HCN1                          | 0.00017514        | 0.000175135          | 0.199827           | -5.00434                     | T down vs N                            | 23.582  | 24.2872   | 16.4786    | 1         |
| cg25612057                          | STK32B                        | 1.18E-05          | 1.18E-05             | 0.215343           | -4.64376                     | T down vs N                            | 38.945  | 22.0839   | 9.07282    | 1         |
| cg25612428                          | ANKRD33B                      | 0.00192788        | 0.00192788           | 3.47642            | 3.47642                      | T up vs N                              | 13.716  | 14.5412   | 16.9623    | 1         |
| cg25615081                          | GK2                           | 0.00059049        | 0.00059049           | 0.274217           | -3.64675                     | T down vs N                            | 18.203  | 15.679    | 13.7814    | 1         |
| cg25616535                          | ABI3;ABI3                     | 0.00042872        | 0.000428715          | 0.319381           | -3.13105                     | T down vs N                            | 19.54   | 12.2015   | 9.99111    | 1         |
| cg25617100                          | ARHGAP12                      | 1.09E-05          | 1.09E-05             | 0.256778           | -3.89442                     | T down vs N                            | 39.458  | 17.312    | 7.01998    | 1         |
| cg25621182                          | COL16A1                       | 0.00200589        | 0.00200589           | 0.330417           | -3.02648                     | T down vs N                            | 13.578  | 11.4861   | 13.5354    | 1         |
| cg25621888                          | FAM71E2                       | 0.00183314        | 0.00183314           | 0.284989           | -3.50891                     | T down vs N                            | 13.894  | 14.7591   | 16.9968    | 1         |
| cg25623473                          | MRPL46                        | 1.63E-06          | 1.63E-06             | 0.285509           | -3.50252                     | T down vs N                            | 54.026  | 14.7163   | 4.35828    | 1         |
| cg25626453                          | BAT2                          | 0.00265522        | 0.00265522           | 0.308195           | -3.2447                      | T down vs N                            | 12.617  | 12.9757   | 16.4552    | 1         |
| cg25627242                          | CILP2                         | 1.23E-05          | 1.23E-05             | 0.252656           | -3.95795                     | T down vs N                            | 38.656  | 17.7266   | 7.33724    | 1         |
| cg25628429                          | ORAC12                        | 6.29E-05          | 6.29E-05             | 0.211923           | -4.7187                      | T down vs N                            | 28.805  | 22.5467   | 12.5237    | 1         |
| cg25629790                          | PODN                          | 0.00041929        | 0.000419289          | 0.305596           | -3.27229                     | T down vs N                            | 19.635  | 13.1631   | 10.7264    | 1         |
| cg25630514                          | GATA3;GATA3                   | 3.47E-05          | 3.47E-05             | 0.250573           | -3.99086                     | T down vs N                            | 32.16   | 17.9406   | 8.92569    | 1         |
| cg25631414                          | THBS2                         | 0.0007297         | 0.000729697          | 3.37631            | 3.37631                      | T up vs N                              | 17.349  | 13.8672   | 12.7889    | 1         |
| cg25631489                          | PHC3                          | 1.48E-07          | 1.48E-07             | 0.180982           | -5.5254                      | T down vs N                            | 78.186  | 27.367    | 5.60039    | 1         |
| cg25632840                          | ABCF1;ABCF1                   | 0.00101385        | 0.00101385           | 0.263113           | -3.80064                     | T down vs N                            | 16.068  | 16.6969   | 16.6265    | 1         |
| cg25634000                          | TOP1MT                        | 0.00014056        | 0.000140563          | 0.313765           | -3.1871                      | T down vs N                            | 24.647  | 12.5838   | 8.16889    | 1         |
| cg25636481                          | RPS18                         | 0.0019105         | 0.0019105            | 0.2782             | -3.59454                     | T down vs N                            | 13.748  | 15.3315   | 17.8429    | 1         |
| cg25636933                          | CEP135                        | 5.95E-05          | 5.95E-05             | 0.266161           | -3.75712                     | T down vs N                            | 29.113  | 16.4101   | 9.01858    | 1         |
| cg25637655                          | HLA-A                         | 0.00010445        | 0.000104447          | 0.25809            | -7.94854                     | T down vs N                            | 27.21   | 37.8814   | 20.883     | 1         |
| cg25637708                          | KIFC1                         | 9.61E-06          | 9.61E-06             | 0.169146           | -5.91206                     | T down vs N                            | 40.344  | 29.5756   | 11.7293    | 1         |
| cg25639415                          | GRHL2                         | 5.99E-05          | 5.99E-05             | 9.31422            | 9.31422                      | T up vs N                              | 29.069  | 46.6414   | 25.6717    | 1         |
| cg25640382                          | CREB5;CREB5;CREB5             | 0.00026334        | 0.000263337          | 0.250876           | -3.98604                     | T down vs N                            | 21.683  | 17.9093   | 13.2155    | 1         |
| cg25641145                          | ANKRD46                       | 3.18E-05          | 3.18E-05             | 0.257195           | -3.8881                      | T down vs N                            | 32.684  | 17.2707   | 8.45465    | 1         |
| cg25641997                          | C11orf20                      | 9.16E-06          | 9.16E-06             | 9.91926            | 9.91926                      | T up vs N                              | 40.672  | 49.3094   | 19.3978    | 1         |
| cg25643600                          | RP1L1                         | 2.07E-05          | 2.07E-05             | 0.102475           | -9.75851                     | T down vs N                            | 35.304  | 48.6096   | 22.03      | 1         |
| cg25644095                          | TLE2;TLE2;TLE2                | 0.00014175        | 0.000141749          | 0.197354           | -5.06704                     | T down vs N                            | 24.606  | 24.6643   | 16.0379    | 1         |
| cg25645879                          | ZNF37B                        | 0.00021747        | 0.00021747           | 0.242988           | -4.11543                     | T down vs N                            | 22.562  | 18.7464   | 13.2944    | 1         |
| cg25648267                          | PITX1                         | 0.00289867        | 0.00289867           | 0.314102           | -3.18368                     | T down vs N                            | 12.324  | 12.5605   | 16.3077    | 1         |
| cg25650956                          | MYH1                          | 9.44E-06          | 9.44E-06             | 0.209748           | -4.76762                     | T down vs N                            | 40.469  | 22.8475   | 9.03319    | 1         |
| cg25652742                          | HDAC4                         | 3.53E-05          | 3.53E-05             | 0.174272           | -5.73816                     | T down vs N                            | 32.071  | 28.5901   | 14.2632    | 1         |
| cg25652751                          | HMG20A                        | 0.00036302        | 0.000363021          | 0.322969           | -3.09627                     | T down vs N                            | 20.256  | 11.9639   | 9.45003    | 1         |
| cg25653341                          | PLOD3                         | 3.54E-06          | 3.54E-06             | 0.319656           | -3.12836                     | T down vs N                            | 47.676  | 12.1831   | 4.08868    | 1         |
| cg25654326                          | CCNY                          | 0.0018787         | 0.0018787            | 0.253177           | -3.9498                      | T down vs N                            | 13.807  | 17.6735   | 20.4806    | 1         |
| cg25657222                          | C17orf100;MED31;C17orf100     | 0.00057152        | 0.00057152           | 0.307671           | -3.25022                     | T down vs N                            | 18.337  | 13.0133   | 11.3548    | 1         |
| cg25660428                          | PDE4C;PDE4C                   | 2.37E-05          | 2.37E-05             | 0.234848           | -4.25807                     | T down vs N                            | 34.464  | 19.6602   | 9.12721    | 1         |
| cg25667997                          | KIAA1688                      | 1.86E-05          | 1.86E-05             | 0.243329           | -4.10966                     | T down vs N                            | 35.963  | 18.7092   | 8.32382    | 1         |
| cg25673720                          | RNF157                        | 6.30E-05          | 6.30E-05             | 0.302486           | -3.30594                     | T down vs N                            | 28.797  | 13.3913   | 7.44033    | 1         |
| cg25674286                          | ADORA3;ADORA3;ADORA3          | 0.00034216        | 0.000342159          | 0.20086            | -4.97859                     | T down vs N                            | 20.515  | 24.1319   | 18.821     | 1         |
| cg25676471                          | PDGFB;PDGFB                   | 2.73E-05          | 2.73E-05             | 0.323672           | -3.08955                     | T down vs N                            | 33.606  | 11.9179   | 5.67415    | 1         |
| PCSK6;PCSK6;PCSK6;PCSK6;PCSK6;PCSK6 |                               |                   |                      |                    |                              |                                        |         |           |            |           |
| cg25677261                          | K6;PCSK6;PCSK6                | 0.00315496        | 0.00315496           | 0.295858           | -3.38                        | T down vs N                            | 12.043  | 13.8921   | 18.456     | 1         |
| cg25678587                          | OR56B4                        | 0.00017896        | 0.00017896           | 0.264597           | -3.77933                     | T down vs N                            | 23.479  | 16.5565   | 11.2827    | 1         |
| cg25681339                          | BHLHA9                        | 0.00046434        | 0.00046434           | 8.91201            | 8.91201                      | T up vs N                              | 19.201  | 44.8144   | 37.3427    | 1         |
| cg25681728                          | DIS3L2                        | 0.00105651        | 0.00105651           | 3.66071            | 3.66071                      | T up vs N                              | 15.911  | 15.7718   | 15.8601    | 1         |
| cg25687358                          | DUOXA1;DUOXA2                 | 0.00472606        | 0.00472606           | 3.19384            | 3.19384                      | T up vs N                              | 10.75   | 12.6297   | 18.7972    | 1         |
| cg25690202                          | SIPA1L3                       | 0.00103532        | 0.00103532           | 0.128143           | -7.8038                      | T down vs N                            | 15.988  | 39.5385   | 39.5685    | 1         |
| cg25690958                          | SPNS2                         | 0.00568568        | 0.00568568           | 3.00638            | 3.00638                      | T up vs N                              | 10.182  | 11.3482   | 17.8332    | 1         |
| cg25692507                          | FUT5                          | 1.01E-06          | 1.01E-06             | 0.209393           | -4.77571                     | T down vs N                            | 58.288  | 22.8971   | 6.28526    | 1         |
| cg25692524                          | THSD1P                        | 0.00035794        | 0.000357942          | 3.40286            | 3.40286                      | T up vs N                              | 20.318  | 14.0463   | 11.0614    | 1         |
| cg25692621                          | ASB4;ASB4                     | 0.00035654        | 0.000356535          | 0.207418           | -4.82119                     | T down vs N                            | 20.335  | 23.1756   | 18.2352    | 1         |
| cg25693317                          | SH3PXD2B                      | 1.18E-05          | 1.18E-05             | 0.306859           | -3.25883                     | T down vs N                            | 38.931  | 13.0717   | 5.37228    | 1         |
| cg25695172                          | MADCAM1;MADCAM1               | 0.00023981        | 0.000239807          | 0.323983           | -3.08658                     | T down vs N                            | 22.11   | 11.8976   | 8.60978    | 1         |
| cg25696949                          | ESPL1                         | 0.00273691        | 0.00273691           | 0.286625           | -3.48888                     | T down vs N                            | 12.515  | 14.6248   | 18.6973    | 1         |
| cg25700897                          | CDCA3                         | 9.33E-05          | 9.33E-05             | 0.261843           | -3.81908                     | T down vs N                            | 26.717  | 16.8181   | 10.0719    | 1         |
| cg25701444                          | LOC400043                     | 0.00048564        | 0.000485643          | 0.253022           | -3.95223                     | T down vs N                            | 19.013  | 17.6893   | 14.8863    | 1         |
| cg25705255                          | PRB3                          | 1.25E-05          | 1.25E-05             | 0.254475           | -3.92966                     | T down vs N                            | 38.562  | 17.5422   | 7.27864    | 1         |
| cg25707951                          | TCF12;TCF12;TCF12;TCF12;TCF12 | 8.42E-05          | 8.42E-05             | 0.261519           | -3.82382                     | T down vs N                            | 27.249  | 16.8493   | 9.89346    | 1         |
| cg25710008                          | GP6;GP6                       | 0.00074148        | 0.000741476          | 0.226215           | -4.42057                     | T down vs N                            | 17.285  | 20.6898   | 19.1512    | 1         |
| cg25712567                          | PCGF3                         | 2.63E-05          | 2.63E-05             | 3.08396            | 3.08396                      | T up vs N                              | 33.824  | 11.8797   | 5.61959    | 1         |
| BLCAP;BLCAP;BLCAP;BLCAP;NNAT;NN     |                               |                   |                      |                    |                              |                                        |         |           |            |           |
| cg25712981                          | AT;BLCAP                      | 0.00031975        | 0.000319754          | 4.0194             | 4.0194                       | T up vs N                              | 20.813  | 18.1258   | 13.9341    | 1         |
| cg25714115                          | GTF2IRD1;GTF2IRD1             | 0.00176457        | 0.00176457           | 0.294518           | -3.39538                     | T down vs N                            | 14.029  | 13.9958   | 15.9627    | 1         |
| cg25714956                          | AUTS2;AUTS2                   | 0.00040015        | 0.00040015           | 0.208892           | -4.78716                     | T down vs N                            | 19.835  | 22.9673   | 18.5267    | 1         |
| cg25716013                          | COX7A2;COX7A2                 | 2.76E-05          | 2.76E-05             | 0.216745           | -4.61371                     | T down vs N                            | 33.527  | 21.8975   | 10.45      | 1         |
| cg25717823                          | OR8U8;OR5AP2                  | 1.94E-05          | 1.94E-05             | 0.286929           | -3.48518                     | T down vs N                            | 35.719  | 14.6      | 6.53986    | 1         |
| cg25720264                          | PLEKHA5;PLEKHA5               | 0.00019883        | 0.000198831          | 3.34253            | 3.34253                      | T up vs N                              | 22.98   | 13.639    | 9.49607    | 1         |
| cg25721732                          | DCTN1;DCTN1;DCTN1;DCTN1       | 6.81E-06          | 6.81E-06             | 0.263646           | -3.79297                     | T down vs N                            | 42.776  | 16.6464   | 6.22646    | 1         |

| Probeset ID | UCSC_REFGENE_NAME                   | p-value<br>(Type) | p-value (T vs.<br>N) | Ratio (T<br>vs. N) | Fold-<br>Change (T<br>vs. N) | Fold-Change (T vs.<br>N) (Description) | F(Type) | SS (Type) | SS (Error) | F (Error) |
|-------------|-------------------------------------|-------------------|----------------------|--------------------|------------------------------|----------------------------------------|---------|-----------|------------|-----------|
| cg25722880  | KANK3                               | 0.00085624        | 0.000856243          | 0.246072           | -4.06386                     | T down vs N                            | 16.719  | 18.4137   | 17.6216    | 1         |
| cg25726128  | ICOSLG                              | 0.00083443        | 0.000834432          | 0.182485           | -5.47991                     | T down vs N                            | 16.82   | 27.1029   | 25.7817    | 1         |
| cg25726756  | C21orf56;C21orf56                   | 0.00043876        | 0.00043876           | 0.244475           | -4.09039                     | T down vs N                            | 19.441  | 18.585    | 15.2953    | 1         |
| cg25728685  | ZSCAN12                             | 0.00527703        | 0.00527703           | 6.26631            | 6.26631                      | T up vs N                              | 10.409  | 31.5444   | 48.4861    | 1         |
| cg25730098  | NLRP11;NLRP4                        | 0.00029185        | 0.00029185           | 0.167222           | -5.98006                     | T down vs N                            | 21.22   | 29.9575   | 22.5886    | 1         |
| cg25734035  | CFB                                 | 0.00514747        | 0.00514747           | 0.315432           | -3.17025                     | T down vs N                            | 10.486  | 12.469    | 19.0261    | 1         |
| cg25734198  | CRISP2;CRISP2;CRISP2;CRISP2;CRISP2  | 0.00452217        | 0.00452217           | 0.31619            | -3.16265                     | T down vs N                            | 10.888  | 12.4172   | 18.2471    | 1         |
| cg25735305  | ESAM                                | 0.00139543        | 0.00139543           | 3.8361             | 3.8361                       | T up vs N                              | 15.28   | 15.934    | 15.6419    | 1         |
| cg25737664  | SIRPD                               | 1.76E-06          | 1.76E-06             | 0.147091           | -6.79851                     | T down vs N                            | 53.412  | 34.4089   | 10.3074    | 1         |
| cg25738340  | HRNBP3                              | 0.00190431        | 0.00190431           | 0.271081           | -3.68893                     | T down vs N                            | 13.759  | 15.959    | 18.5578    | 1         |
| cg25738529  | KCNH3                               | 7.02E-06          | 7.02E-06             | 3.13096            | 3.13096                      | T up vs N                              | 42.553  | 12.2009   | 4.58759    | 1         |
| cg25742300  | LRP1B                               | 0.00631473        | 0.00631473           | 0.326324           | -3.06444                     | T down vs N                            | 9.8652  | 11.746    | 19.0505    | 1         |
| cg25743268  | NOTUM                               | 0.00266277        | 0.00266277           | 0.297997           | -3.35573                     | T down vs N                            | 12.607  | 13.7282   | 17.4227    | 1         |
| cg25745642  | EFNA3                               | 5.94E-05          | 5.94E-05             | 0.332209           | -3.01016                     | T down vs N                            | 29.116  | 11.3741   | 6.25036    | 1         |
| cg25745746  | VWA5B1;VWA5B1                       | 6.93E-07          | 6.93E-07             | 0.217846           | -4.59039                     | T down vs N                            | 61.835  | 21.7526   | 5.62854    | 1         |
| cg25746134  | PTPN7;PTPN7                         | 0.00029056        | 0.000290558          | 0.295016           | -3.38965                     | T down vs N                            | 21.24   | 13.9572   | 10.5142    | 1         |
| cg25747192  | RASSF1;RASSF1                       | 5.74E-06          | 5.74E-06             | 4.67444            | 4.67444                      | T up vs N                              | 44.017  | 22.2737   | 8.09641    | 1         |
| cg25747935  | ORS1A2                              | 4.47E-08          | 4.47E-08             | 0.15249            | -6.5578                      | T down vs N                            | 93.208  | 33.1268   | 5.6865     | 1         |
| cg25748441  | CASP8;CASP8;CASP8;CASP8;CASP8       | 1.83E-08          | 1.83E-08             | 0.097586           | -10.2474                     | T down vs N                            | 106.02  | 50.7182   | 7.65439    | 1         |
| cg25751453  | MUC16                               | 0.0009744         | 0.000974402          | 0.195843           | -5.10612                     | T down vs N                            | 16.219  | 24.8984   | 24.5615    | 1         |
| cg25756435  | MAST1                               | 0.004696          | 0.004696             | 22.4405            | 22.4405                      | T up vs N                              | 11.595  | 75.1985   | 84.3122    | 1         |
| cg25756470  | NCF4;NCF4                           | 2.12E-05          | 2.12E-05             | 0.256645           | -3.89644                     | T down vs N                            | 35.163  | 17.3252   | 7.88348    | 1         |
| cg25756680  | UNC93B1                             | 2.26E-06          | 2.26E-06             | 0.223942           | -4.46545                     | T down vs N                            | 51.298  | 20.972    | 6.54127    | 1         |
| cg25758242  | OR2H1                               | 0.0007599         | 0.000759898          | 0.301608           | -3.31556                     | T down vs N                            | 17.188  | 13.4564   | 12.5262    | 1         |
| cg25758828  | PAX8;PAX8;PAX8;PAX8;PAX8;LOC4408    | 0.00485993        | 0.00485993           | 0.277831           | -3.5993                      | T down vs N                            | 10.663  | 15.3633   | 23.0519    | 1         |
| cg25758978  | RAB11B                              | 0.00089846        | 0.00089846           | 0.309704           | -3.22889                     | T down vs N                            | 16.532  | 12.8682   | 12.454     | 1         |
| cg25760325  | TRIML1                              | 8.43E-05          | 8.43E-05             | 0.228794           | -4.37075                     | T down vs N                            | 27.242  | 20.3754   | 11.9671    | 1         |
| cg25761371  | C3                                  | 0.00072201        | 0.00072201           | 0.245907           | -4.06658                     | T down vs N                            | 17.391  | 18.4312   | 16.9568    | 1         |
| cg25761626  | PPYR1                               | 0.00051912        | 0.000519121          | 5.23584            | 5.23584                      | T up vs N                              | 18.734  | 25.6705   | 21.9238    | 1         |
| cg25762078  | SLC1A7                              | 6.08E-05          | 6.08E-05             | 0.31566            | -3.16796                     | T down vs N                            | 28.996  | 12.4534   | 6.87182    | 1         |
| cg25763426  | NCOR2;NCOR2                         | 2.82E-05          | 2.82E-05             | 0.277695           | -3.60107                     | T down vs N                            | 33.397  | 15.375    | 7.36606    | 1         |
| cg25763520  | PRPH                                | 0.00101575        | 0.00101575           | 0.301183           | -3.32024                     | T down vs N                            | 16.061  | 13.4881   | 13.4373    | 1         |
| cg25764570  | HLA-DRA                             | 0.00010161        | 0.000101607          | 0.168636           | -5.92993                     | T down vs N                            | 26.275  | 29.6762   | 18.071     | 1         |
| cg25769980  | TLR6                                | 1.32E-05          | 1.32E-05             | 0.204268           | -4.89553                     | T down vs N                            | 38.202  | 23.6286   | 9.8964     | 1         |
| cg25770135  | COL23A1                             | 0.0004946         | 0.000494603          | 0.288688           | -3.46395                     | T down vs N                            | 18.936  | 14.4574   | 12.2157    | 1         |
| cg25770495  | CLEC17A                             | 0.00078239        | 0.000782392          | 0.323514           | -3.09106                     | T down vs N                            | 17.073  | 11.9282   | 11.1786    | 1         |
| cg25771041  | WWTR1;WWTR1;WWTR1                   | 0.00019517        | 0.000195173          | 36.7741            | 36.7741                      | T up vs N                              | 23.068  | 121.709   | 84.4183    | 1         |
| cg25774643  | SCT                                 | 0.00231236        | 0.00231236           | 6.68173            | 6.68173                      | T up vs N                              | 13.086  | 43.7482   | 53.4902    | 1         |
| cg25775770  | C22orf24                            | 0.0010071         | 0.0010071            | 0.285793           | -3.49904                     | T down vs N                            | 16.093  | 14.693    | 14.6079    | 1         |
| cg25780607  | ARSI;ARSI                           | 3.58E-06          | 3.58E-06             | 15.2841            | 15.2841                      | T up vs N                              | 47.603  | 69.6422   | 23.4076    | 1         |
| cg25781595  | GRIN2D                              | 0.00033765        | 0.000337645          | 5.72297            | 5.72297                      | T up vs N                              | 20.573  | 28.5035   | 22.1675    | 1         |
| cg25781868  | CABP2;CABP2                         | 0.00014048        | 0.000140483          | 0.330634           | -3.02449                     | T down vs N                            | 24.65   | 11.4724   | 7.44658    | 1         |
| cg25782665  | HTR3C                               | 6.92E-06          | 6.92E-06             | 0.296479           | -3.37292                     | T down vs N                            | 42.653  | 13.8443   | 5.1933     | 1         |
| cg25784219  | FOSL2                               | 0.00580141        | 0.00580141           | 0.319502           | -3.12987                     | T down vs N                            | 10.121  | 12.1934   | 19.2771    | 1         |
| cg25786675  | KCNQ1;KCNQ1                         | 0.00011856        | 0.000118561          | 0.320386           | -3.12124                     | T down vs N                            | 25.493  | 12.1345   | 7.61596    | 1         |
| cg25786785  | TMPRSS6                             | 1.26E-05          | 1.26E-05             | 0.308339           | -3.24318                     | T down vs N                            | 38.521  | 12.9654   | 5.38531    | 1         |
| cg25787812  | MICB                                | 0.00049           | 0.000490004          | 0.328517           | -3.04398                     | T down vs N                            | 18.975  | 11.606    | 9.78622    | 1         |
| cg25789370  | FGFR1OP;FGFR1OP                     | 0.00382108        | 0.00382108           | 0.214389           | -4.66443                     | T down vs N                            | 11.422  | 22.2118   | 31.1151    | 1         |
| cg25791578  | IL5RA;IL5RA;IL5RA;IL5RA;IL5RA;IL5RA | 0.0006433         | 0.000643301          | 0.320917           | -3.11607                     | T down vs N                            | 17.855  | 12.0992   | 10.8423    | 1         |
| cg25797454  | RAET1K                              | 9.27E-05          | 9.27E-05             | 0.2711             | -3.68867                     | T down vs N                            | 26.746  | 15.9573   | 9.54594    | 1         |
| cg25798460  | ORS5A5                              | 8.49E-05          | 8.49E-05             | 0.316783           | -3.15673                     | T down vs N                            | 27.204  | 12.3768   | 7.27938    | 1         |
| cg25799059  | CDCP1                               | 0.00022071        | 0.000220705          | 0.288375           | -3.46771                     | T down vs N                            | 22.493  | 14.4827   | 10.302     | 1         |
| cg25800500  | ANKRD23                             | 3.00E-05          | 3.00E-05             | 3.45073            | 3.45073                      | T up vs N                              | 33.034  | 14.3686   | 6.9595     | 1         |
| cg25801052  | ARID5A                              | 1.41E-05          | 1.41E-05             | 4.18092            | 4.18092                      | T up vs N                              | 37.742  | 19.1671   | 8.12547    | 1         |
| cg25801976  | KIAA0146                            | 0.00014635        | 0.000146346          | 0.229579           | -4.35579                     | T down vs N                            | 24.45   | 20.2808   | 13.2719    | 1         |
| cg25806685  | LILRA1                              | 0.00029247        | 0.000292469          | 0.294558           | -3.39492                     | T down vs N                            | 21.21   | 13.9927   | 10.5555    | 1         |
| cg25806701  | LRAT                                | 0.00614967        | 0.00614967           | 6.89557            | 6.89557                      | T up vs N                              | 9.9447  | 34.9198   | 56.1827    | 1         |
| cg25806704  | TMEM33                              | 4.01E-06          | 4.01E-06             | 0.145479           | -6.87386                     | T down vs N                            | 46.715  | 34.8058   | 11.9211    | 1         |
| cg25812043  | PNPLA7;PNPLA7                       | 4.79E-05          | 4.79E-05             | 0.269503           | -3.71053                     | T down vs N                            | 30.316  | 16.1021   | 8.49832    | 1         |
| cg25815024  | PRKAG3                              | 2.75E-05          | 2.75E-05             | 0.243862           | -4.10067                     | T down vs N                            | 33.561  | 18.6513   | 8.89193    | 1         |
| cg25818109  | MASP1                               | 2.18E-05          | 2.18E-05             | 0.24231            | -4.12695                     | T down vs N                            | 34.973  | 18.8205   | 8.61044    | 1         |
| cg25819275  | OR2G6                               | 4.24E-07          | 4.24E-07             | 0.184438           | -5.42189                     | T down vs N                            | 66.701  | 26.7647   | 6.42028    | 1         |
| cg25819879  | RPS7                                | 0.00204377        | 0.00204377           | 0.310854           | -3.21694                     | T down vs N                            | 13.512  | 12.787    | 15.1411    | 1         |
| cg25821783  | CCDC46;CCDC46                       | 0.00233654        | 0.00233654           | 0.312963           | -3.19527                     | T down vs N                            | 13.05   | 12.6394   | 15.4962    | 1         |
| cg25823926  | CRADD                               | 5.66E-06          | 5.66E-06             | 0.199894           | -5.00265                     | T down vs N                            | 44.112  | 24.277    | 8.80562    | 1         |
| cg25824978  | ZNF830;CTT6B;ZNF830                 | 3.10E-05          | 3.10E-05             | 0.248678           | -4.02127                     | T down vs N                            | 32.831  | 18.138    | 8.83942    | 1         |
| cg25825391  | ORS5H6                              | 0.00051823        | 0.000518232          | 0.244997           | -4.08168                     | T down vs N                            | 18.741  | 18.5287   | 15.8184    | 1         |
| cg25826360  | RHBDF2;RHBDF2                       | 4.93E-05          | 4.93E-05             | 6.80419            | 6.80419                      | T up vs N                              | 30.152  | 34.4389   | 18.2749    | 1         |
| cg25826515  | ABCB5;ABCB5                         | 1.15E-05          | 1.15E-05             | 0.295472           | -3.38442                     | T down vs N                            | 39.136  | 13.9219   | 5.69167    | 1         |

| Probeset ID                      | UCSC_REFGENE_NAME             | p-value<br>(Type) | p-value (T vs.<br>N) | Ratio (T<br>vs. N) | Fold-<br>Change (T<br>vs. N) | Fold-Change (T vs.<br>N) (Description) | F(Type) | SS (Type) | SS (Error) | F (Error) |
|----------------------------------|-------------------------------|-------------------|----------------------|--------------------|------------------------------|----------------------------------------|---------|-----------|------------|-----------|
| cg25830307                       | C10orf11                      | 6.75E-05          | 6.75E-05             | 9.35108            | 9.35108                      | T up vs N                              | 28.424  | 46.8067   | 26.348     | 1         |
| cg25831281                       | XAGE5                         | 0.00087646        | 0.000876455          | 0.324071           | -3.08575                     | T down vs N                            | 16.628  | 11.8919   | 11.4425    | 1         |
| cg25832824                       | CMKLR1;CMKLR1;CMKLR1          | 0.00471114        | 0.00471114           | 0.14294            | -6.99593                     | T down vs N                            | 10.76   | 35.4444   | 52.7049    | 1         |
| cg25833003                       | CPN1                          | 9.48E-05          | 9.48E-05             | 0.263003           | -3.80223                     | T down vs N                            | 26.63   | 16.7073   | 10.0381    | 1         |
| cg25834768                       | CAMKK1;CAMKK1;CAMKK1          | 0.00010446        | 0.000104455          | 4.8258             | 4.8258                       | T up vs N                              | 26.134  | 23.2037   | 14.2061    | 1         |
| cg25835179                       | ACY3                          | 0.00331706        | 0.00331706           | 0.235725           | -4.24222                     | T down vs N                            | 11.879  | 19.5591   | 26.3439    | 1         |
| cg25837340                       | KCNJ1;KCNJ1;KCNJ1;KCNJ1;KCNJ1 | 0.00025942        | 0.000259424          | 0.326469           | -3.06308                     | T down vs N                            | 21.751  | 11.7367   | 8.63361    | 1         |
| cg25840094                       | CFHR5                         | 0.00101636        | 0.00101636           | 0.221119           | -4.52246                     | T down vs N                            | 16.058  | 21.3291   | 21.2517    | 1         |
| cg25840354                       | TLR10;TLR10                   | 4.89E-05          | 4.89E-05             | 0.213649           | -4.68057                     | T down vs N                            | 30.203  | 22.3116   | 11.8196    | 1         |
| cg25840822                       | ABCB5;ABCB5;ABCB5             | 0.00253304        | 0.00253304           | 0.313274           | -3.1921                      | T down vs N                            | 12.776  | 12.6178   | 15.8023    | 1         |
| cg25843003                       | HCP5                          | 9.02E-05          | 9.02E-05             | 0.311047           | -3.21495                     | T down vs N                            | 26.888  | 12.7734   | 7.60085    | 1         |
| cg25844471                       | C10orf67                      | 2.22E-05          | 2.22E-05             | 0.191251           | -5.22873                     | T down vs N                            | 34.873  | 25.6284   | 11.7584    | 1         |
| cg25845985                       | PRRT1                         | 0.00043208        | 0.000432084          | 3.4935             | 3.4935                       | T up vs N                              | 19.507  | 14.6558   | 12.0213    | 1         |
| cg25850629                       | KIAA1522                      | 3.96E-07          | 3.96E-07             | 0.317852           | -3.14612                     | T down vs N                            | 67.399  | 12.3044   | 2.92094    | 1         |
| cg25851651                       | OR7A5                         | 0.00082717        | 0.000827167          | 0.234579           | -4.26296                     | T down vs N                            | 16.854  | 19.6914   | 18.6934    | 1         |
| cg25856090                       | CLCN1                         | 0.00014412        | 0.000144119          | 0.290677           | -3.44024                     | T down vs N                            | 24.525  | 14.2981   | 9.3281     | 1         |
| cg25856632                       | DLG4;DLG4                     | 3.36E-06          | 3.36E-06             | 3.23404            | 3.23404                      | T up vs N                              | 48.095  | 12.9033   | 4.29263    | 1         |
| cg25856811                       | SPRR3;SPRR3                   | 0.00022213        | 0.00022213           | 0.207454           | -4.82035                     | T down vs N                            | 22.463  | 23.1704   | 16.5038    | 1         |
| cg25861066                       | LOC285954                     | 0.00053312        | 0.00053312           | 0.32494            | -3.07749                     | T down vs N                            | 18.624  | 11.8354   | 10.1679    | 1         |
| cg25862345                       | DSCR4                         | 0.00024432        | 0.000244324          | 0.32094            | -3.11585                     | T down vs N                            | 22.024  | 12.0977   | 8.78857    | 1         |
| cg25862768                       | C8ORFK29                      | 0.00072828        | 0.000728275          | 4.09818            | 4.09818                      | T up vs N                              | 17.357  | 18.6352   | 17.1784    | 1         |
| cg25863289                       | TM2D3;TM2D3                   | 0.00268926        | 0.00268926           | 0.121892           | -8.20396                     | T down vs N                            | 12.574  | 41.4866   | 52.7904    | 1         |
| cg25863735                       | ADAL                          | 0.00021098        | 0.000210975          | 0.321013           | -3.11514                     | T down vs N                            | 22.703  | 12.0928   | 8.52256    | 1         |
| cg25863892                       | FLJ41562;FLJ41562             | 5.74E-05          | 5.74E-05             | 0.270573           | -3.69586                     | T down vs N                            | 29.31   | 16.005    | 8.73682    | 1         |
| cg25865120                       | DUT;DUT;DUT                   | 0.00056119        | 0.000561185          | 0.282199           | -3.5436                      | T down vs N                            | 18.412  | 14.9913   | 13.0275    | 1         |
| cg25866895                       | GSTP1                         | 3.12E-05          | 3.12E-05             | 0.278918           | -3.58529                     | T down vs N                            | 32.795  | 15.2698   | 7.44989    | 1         |
| cg25867632                       | LYZL4;LYZL4                   | 0.00012103        | 0.000121025          | 0.313806           | -3.18668                     | T down vs N                            | 25.39   | 12.581    | 7.92826    | 1         |
| cg25871713                       | ITGA9                         | 3.27E-05          | 3.27E-05             | 0.331926           | -3.01272                     | T down vs N                            | 32.52   | 11.3917   | 5.60474    | 1         |
| cg25877436                       | GTF3A                         | 0.00010015        | 0.000100154          | 0.300952           | -3.32278                     | T down vs N                            | 26.349  | 13.5053   | 8.2009     | 1         |
| cg25881170                       | CD47;CD47;CD47                | 3.52E-05          | 3.52E-05             | 3.33507            | 3.33507                      | T up vs N                              | 32.082  | 13.5885   | 6.77693    | 1         |
| cg25883348                       | TRPM8                         | 2.67E-05          | 2.67E-05             | 0.314756           | -3.17706                     | T down vs N                            | 33.735  | 12.5154   | 5.93587    | 1         |
| cg25885038                       | SEPT4;SEPT4;SEPT4             | 0.00027323        | 0.000273228          | 5.17166            | 5.17166                      | T up vs N                              | 21.516  | 25.2895   | 18.8061    | 1         |
| cg25887069                       | GALR3                         | 0.00379942        | 0.00379942           | 10.6662            | 10.6662                      | T up vs N                              | 11.44   | 52.4794   | 73.3979    | 1         |
| cg25887236                       | MBP;MBP                       | 8.00E-06          | 8.00E-06             | 21.5036            | 21.5036                      | T up vs N                              | 41.622  | 88.1729   | 33.8949    | 1         |
| cg25888700                       | KLHL34;KLHL34                 | 0.00285213        | 0.00285213           | 27.4671            | 27.4671                      | T up vs N                              | 12.377  | 102.802   | 132.891    | 1         |
| cg25890168                       | ABHD3;MIR320C1                | 0.00022311        | 0.000223105          | 0.128763           | -7.76618                     | T down vs N                            | 22.443  | 39.3528   | 28.0555    | 1         |
| cg25891078                       | WNT5B;WNT5B                   | 6.85E-06          | 6.85E-06             | 0.301122           | -3.32092                     | T down vs N                            | 42.724  | 13.4927   | 5.05301    | 1         |
| cg25895948                       | ALPK3                         | 1.10E-05          | 1.10E-05             | 19.2808            | 19.2808                      | T up vs N                              | 39.401  | 82.0132   | 33.3039    | 1         |
| cg25898092                       | TMEM233                       | 0.00036597        | 0.000365969          | 0.28909            | -3.45913                     | T down vs N                            | 20.221  | 14.425    | 11.4139    | 1         |
| cg25903122                       | C19orf42                      | 0.00346608        | 0.00346608           | 3.04472            | 3.04472                      | T up vs N                              | 11.736  | 11.611    | 15.8293    | 1         |
| cg25904183                       | C4orf39;TRIM61                | 3.32E-05          | 3.32E-05             | 0.214347           | -4.66534                     | T down vs N                            | 32.434  | 22.2174   | 10.9602    | 1         |
| cg25904585                       | TP53AIP1                      | 2.27E-05          | 2.27E-05             | 0.242631           | -4.12148                     | T down vs N                            | 34.732  | 18.7853   | 8.65384    | 1         |
| cg25906620                       | IMPA2                         | 4.54E-05          | 4.54E-05             | 0.32082            | -3.11701                     | T down vs N                            | 30.617  | 12.1056   | 6.3262     | 1         |
| cg25907302                       | FUT11                         | 0.0038614         | 0.0038614            | 0.288309           | -3.4685                      | T down vs N                            | 11.388  | 14.488    | 20.3552    | 1         |
| SLC26A11;SLC26A11;SLC26A11;SLC26 |                               |                   |                      |                    |                              |                                        |         |           |            |           |
| cg25908434                       | A11                           | 0.00221443        | 0.00221443           | 0.327623           | -3.05229                     | T down vs N                            | 13.235  | 11.6629   | 14.0999    | 1         |
| cg25909396                       | PRKCA                         | 6.53E-06          | 6.53E-06             | 0.330658           | -3.02427                     | T down vs N                            | 43.069  | 11.4709   | 4.26139    | 1         |
| cg25914921                       | MAGI2                         | 4.45E-05          | 4.45E-05             | 3.70099            | 3.70099                      | T up vs N                              | 30.734  | 16.039    | 8.34993    | 1         |
| cg25915512                       | IL1F8;IL1F8                   | 4.23E-05          | 4.23E-05             | 0.325823           | -3.06915                     | T down vs N                            | 31.019  | 11.7783   | 6.07539    | 1         |
| cg25916307                       | KREMEN1;KREMEN1               | 0.00017716        | 0.000177157          | 7.41833            | 7.41833                      | T up vs N                              | 23.527  | 37.6129   | 25.5794    | 1         |
| cg25918245                       | GIMAP2                        | 0.00273867        | 0.00273867           | 0.306723           | -3.26027                     | T down vs N                            | 12.513  | 13.0815   | 16.727     | 1         |
| cg25921502                       | C10orf128                     | 0.00016815        | 0.00016815           | 0.306053           | -3.26741                     | T down vs N                            | 23.777  | 13.13     | 8.83551    | 1         |
| cg25924139                       | PTPRM;PTPRM                   | 1.46E-05          | 1.46E-05             | 0.21843            | -4.57812                     | T down vs N                            | 37.547  | 21.6763   | 9.23687    | 1         |
| cg25924558                       | TRIM31                        | 0.00031736        | 0.000317357          | 0.210245           | -4.75636                     | T down vs N                            | 20.847  | 22.7784   | 17.4827    | 1         |
| cg25930161                       | ADAMTS2                       | 0.00321855        | 0.00321855           | 0.328395           | -3.04511                     | T down vs N                            | 11.978  | 11.6137   | 15.5135    | 1         |
| cg25932290                       | LOC254559                     | 5.84E-06          | 5.84E-06             | 0.179121           | -5.58283                     | T down vs N                            | 43.884  | 27.6991   | 10.099     | 1         |
| cg25937451                       | C21orf29;KRTAP10-5            | 0.00029483        | 0.000294831          | 0.305945           | -3.26856                     | T down vs N                            | 21.174  | 13.1378   | 9.92743    | 1         |
| cg25938530                       | ITIH1;ITIH1                   | 9.03E-05          | 9.03E-05             | 0.317902           | -3.14562                     | T down vs N                            | 26.881  | 12.301    | 7.32174    | 1         |
| cg25938803                       | THADA;THADA                   | 0.00020421        | 0.000204205          | 0.220631           | -4.53246                     | T down vs N                            | 22.855  | 21.3915   | 14.9754    | 1         |
| cg25938806                       | HOXD3                         | 0.00010566        | 0.000105662          | 7.43587            | 7.43587                      | T up vs N                              | 26.075  | 37.7016   | 23.134     | 1         |
| cg25939350                       | TERT;TERT                     | 8.49E-05          | 8.49E-05             | 0.234326           | -4.26756                     | T down vs N                            | 27.204  | 19.7207   | 11.5989    | 1         |
| cg25940248                       | KLB                           | 2.73E-05          | 2.73E-05             | 6.08159            | 6.08159                      | T up vs N                              | 33.601  | 30.5242   | 14.5349    | 1         |
| cg25940517                       | IQCD                          | 3.12E-05          | 3.12E-05             | 0.328315           | -3.04586                     | T down vs N                            | 32.8    | 11.6188   | 5.66772    | 1         |
| cg25940557                       | OR10Z1                        | 1.17E-07          | 1.17E-07             | 0.159859           | -6.25551                     | T down vs N                            | 80.973  | 31.4851   | 6.22139    | 1         |
| cg25940827                       | HSPG2                         | 0.00645905        | 0.00645905           | 0.309433           | -3.23171                     | T down vs N                            | 9.7976  | 12.8874   | 21.0458    | 1         |
| cg25942990                       | HOXD4;MIR10B                  | 0.0013041         | 0.0013041            | 10.9967            | 10.9967                      | T up vs N                              | 15.123  | 53.8412   | 56.9635    | 1         |
| cg25945273                       | CLEC17A                       | 0.00015242        | 0.000152418          | 0.25476            | -3.92526                     | T down vs N                            | 24.252  | 17.5135   | 11.5546    | 1         |
| cg25945676                       | SLC12A7                       | 0.00098391        | 0.000983909          | 0.270519           | -3.69659                     | T down vs N                            | 16.182  | 16.0098   | 15.8295    | 1         |
| cg25946646                       | BMPRI1A                       | 2.20E-05          | 2.20E-05             | 0.235947           | -4.23825                     | T down vs N                            | 34.908  | 19.5338   | 8.95336    | 1         |
| cg25947525                       | DLG3;DLG3;DLG3                | 0.00040903        | 0.000409029          | 10.5225            | 10.5225                      | T up vs N                              | 19.741  | 51.8796   | 42.0488    | 1         |
| cg25948180                       | PDHX;PDHX;APIP;PDHX           | 0.00460699        | 0.00460699           | 0.273046           | -3.66238                     | T down vs N                            | 10.83   | 15.7829   | 23.3176    | 1         |
| cg25950520                       | RALB                          | 0.00030637        | 0.000306366          | 4.28525            | 4.28525                      | T up vs N                              | 21.003  | 19.8333   | 15.1089    | 1         |

| Probeset ID                                                      | UCSC_REFGENE_NAME             | p-value<br>(Type) | p-value (T vs.<br>N) | Ratio (T<br>vs. N) | Fold-<br>Change (T<br>vs. N) | Fold-Change (T vs.<br>N) (Description) | F(Type) | SS (Type) | SS (Error) | F (Error) |
|------------------------------------------------------------------|-------------------------------|-------------------|----------------------|--------------------|------------------------------|----------------------------------------|---------|-----------|------------|-----------|
| NFATC1;NFATC1;NFATC1;NFATC1;NFA                                  |                               |                   |                      |                    |                              |                                        |         |           |            |           |
| cg25951288                                                       | TC1                           | 0.00042288        | 0.000422878          | 0.281271           | -3.55529                     | T down vs N                            | 19.598  | 15.0695   | 12.3028    | 1         |
| cg25952192                                                       | TTC39C;TTC39C                 | 0.00165801        | 0.00165801           | 0.298749           | -3.3473                      | T down vs N                            | 14.251  | 13.6712   | 15.3496    | 1         |
| cg25952247                                                       | LHX3;LHX3                     | 2.88E-05          | 2.88E-05             | 0.291937           | -3.4254                      | T down vs N                            | 33.284  | 14.1981   | 6.82519    | 1         |
| cg25952663                                                       | FLJ12825                      | 3.10E-05          | 3.10E-05             | 0.241384           | -4.14278                     | T down vs N                            | 32.825  | 18.9223   | 9.22347    | 1         |
| cg25952997                                                       | FMNL1                         | 0.00019376        | 0.000193764          | 6.12761            | 6.12761                      | T up vs N                              | 23.102  | 30.7796   | 21.3175    | 1         |
| cg25953453                                                       | TM9SF4                        | 4.84E-05          | 4.84E-05             | 0.121012           | -8.26365                     | T down vs N                            | 30.262  | 41.7729   | 22.0862    | 1         |
| cg25953788                                                       | LALBA                         | 3.78E-06          | 3.78E-06             | 0.228342           | -4.47743                     | T down vs N                            | 47.171  | 21.0472   | 7.1391     | 1         |
| cg25955341                                                       | LYPLA2P1                      | 3.48E-05          | 3.48E-05             | 0.254244           | -3.93322                     | T down vs N                            | 32.157  | 17.5655   | 8.73987    | 1         |
| cg25957058                                                       | GPR1;GPR1                     | 0.00489727        | 0.00489727           | 0.324452           | -3.08212                     | T down vs N                            | 10.64   | 11.8671   | 17.8457    | 1         |
| PCDHAC2;PCDHA7;PCDHA12;PCDHA6;<br>PCDHA10;PCDHA4;PCDHA11;PCDHA8; |                               |                   |                      |                    |                              |                                        |         |           |            |           |
| cg25962358                                                       | PCDHA6;PCDHA1;PCDHA2;PCDHA1   | 0.00018056        | 0.000180556          | 3.45626            | 3.45626                      | T up vs N                              | 23.436  | 14.4057   | 9.83476    | 1         |
| cg25964019                                                       | DNAH11                        | 0.00039087        | 0.000390872          | 0.224603           | -4.4523                      | T down vs N                            | 19.936  | 20.8894   | 16.7652    | 1         |
| cg25964534                                                       | C6orf26                       | 1.95E-05          | 1.95E-05             | 0.228578           | -4.37486                     | T down vs N                            | 35.666  | 20.4015   | 9.15227    | 1         |
| cg25965776                                                       | SCFD2                         | 8.12E-06          | 8.12E-06             | 0.22157            | -4.51324                     | T down vs N                            | 41.515  | 21.2715   | 8.19801    | 1         |
| PCDHA7;PCDHA12;PCDHA6;PCDHA10;<br>PCDHA4;PCDHA11;PCDHA8;PCDHA1;P |                               |                   |                      |                    |                              |                                        |         |           |            |           |
| cg25967418                                                       | CDHA2;PCDHA6;PCDHA1;PCDHA9;   | 0.00032512        | 0.000325117          | 3.5183             | 3.5183                       | T up vs N                              | 20.74   | 14.822    | 11.4347    | 1         |
| cg25967459                                                       | OR9Q1                         | 0.00092925        | 0.000929252          | 0.280252           | -3.56821                     | T down vs N                            | 16.402  | 15.1558   | 14.7845    | 1         |
| cg25967612                                                       | OR10V1                        | 0.00010137        | 0.000101368          | 0.181199           | -5.51881                     | T down vs N                            | 26.287  | 27.3287   | 16.6339    | 1         |
| cg25969791                                                       | EDA;EDA;EDA;EDA;EDA           | 0.00015487        | 0.000154873          | 0.31473            | -3.17733                     | T down vs N                            | 24.174  | 12.5172   | 8.28479    | 1         |
| cg25970491                                                       | CLTCL1;CLTCL1                 | 4.96E-06          | 4.96E-06             | 0.234449           | -4.26531                     | T down vs N                            | 45.105  | 19.7064   | 6.99042    | 1         |
| cg25971807                                                       | PRR13;PRR13                   | 5.02E-05          | 5.02E-05             | 0.211567           | -4.72665                     | T down vs N                            | 30.054  | 22.5957   | 12.0293    | 1         |
| cg25974901                                                       | PLA2G5;PLA2G5                 | 0.00204563        | 0.00204563           | 0.318896           | -3.13582                     | T down vs N                            | 13.509  | 12.234    | 14.4898    | 1         |
| cg25977026                                                       | KDM1A;KDM1A                   | 0.00032106        | 0.000321058          | 0.23648            | -4.22869                     | T down vs N                            | 20.795  | 19.4727   | 14.9825    | 1         |
| DISC1;DISC1;DISC1;DISC1;DISC1;DISC1<br>;TSNAX-                   |                               |                   |                      |                    |                              |                                        |         |           |            |           |
| cg25979244                                                       | DISC1;DISC1;DISC1;DISC1;DISC1 | 7.07E-05          | 7.07E-05             | 0.323379           | -3.09235                     | T down vs N                            | 28.176  | 11.937    | 6.77856    | 1         |
| cg25981998                                                       | TRIM10;TRIM10                 | 5.48E-05          | 5.48E-05             | 0.257477           | -3.88384                     | T down vs N                            | 29.562  | 17.2429   | 9.33258    | 1         |
| cg25988710                                                       | CDX4                          | 0.00056561        | 0.000565607          | 4.98223            | 4.98223                      | T up vs N                              | 18.38   | 24.1539   | 21.0266    | 1         |
| cg25995460                                                       | C1QA                          | 6.56E-05          | 6.56E-05             | 0.237711           | -4.20679                     | T down vs N                            | 28.577  | 19.3328   | 10.8243    | 1         |
| cg25995724                                                       | FABP5;FABP5                   | 5.21E-05          | 5.21E-05             | 9.17824            | 9.17824                      | T up vs N                              | 29.841  | 46.0287   | 24.6795    | 1         |
| cg25995980                                                       | GPRIN2                        | 0.00014709        | 0.000147091          | 3.28707            | 3.28707                      | T up vs N                              | 24.425  | 13.2633   | 8.6884     | 1         |
| cg25996586                                                       | NPR3                          | 0.00013631        | 0.000136309          | 0.141467           | -7.06877                     | T down vs N                            | 24.799  | 35.8229   | 23.1129    | 1         |
| cg25997500                                                       | PLA2R1;PLA2R1                 | 0.00014434        | 0.000144337          | 9.03421            | 9.03421                      | T up vs N                              | 24.517  | 45.3742   | 29.6112    | 1         |
| cg25997722                                                       | SYTL3                         | 1.25E-05          | 1.25E-05             | 0.109572           | -9.12641                     | T down vs N                            | 38.574  | 45.7938   | 18.9949    | 1         |
| cg25999637                                                       | PDLIM3;PDLIM3                 | 0.00264364        | 0.00264364           | 0.137744           | -7.25984                     | T down vs N                            | 12.632  | 36.8066   | 46.6221    | 1         |
| cg26000619                                                       | AMH                           | 2.29E-05          | 2.29E-05             | 8.32659            | 8.32659                      | T up vs N                              | 34.674  | 42.0736   | 19.4146    | 1         |
| cg26002615                                                       | ALKBH8                        | 1.88E-05          | 1.88E-05             | 0.158243           | -6.3194                      | T down vs N                            | 35.899  | 31.8351   | 14.1886    | 1         |
| cg26003933                                                       | NPHP4                         | 1.72E-05          | 1.72E-05             | 0.123124           | -8.12191                     | T down vs N                            | 36.473  | 41.0913   | 18.026     | 1         |
| cg26004203                                                       | ESRRG                         | 0.00480208        | 0.00480208           | 3.79025            | 3.79025                      | T up vs N                              | 10.701  | 16.6285   | 24.8635    | 1         |
| cg26004759                                                       | UCP1                          | 0.00014465        | 0.000144647          | 8.45955            | 8.45955                      | T up vs N                              | 24.507  | 42.7049   | 27.8812    | 1         |
| TPD52L1;TPD52L1;TPD52L1;TPD52L1;                                 |                               |                   |                      |                    |                              |                                        |         |           |            |           |
| cg26005766                                                       | TPD52L1                       | 0.0053303         | 0.0053303            | 10.7041            | 10.7041                      | T up vs N                              | 10.379  | 52.6367   | 81.1466    | 1         |
| cg26006084                                                       | STK10                         | 7.83E-05          | 7.83E-05             | 0.251844           | -3.9707                      | T down vs N                            | 27.631  | 17.8096   | 10.3128    | 1         |
| cg26008365                                                       | RAB13;RAB13                   | 0.00042354        | 0.000423539          | 0.248703           | -4.02086                     | T down vs N                            | 19.592  | 18.1353   | 14.8107    | 1         |
| cg26009230                                                       | NOTCH4                        | 0.00024438        | 0.000244384          | 0.232532           | -4.30048                     | T down vs N                            | 22.023  | 19.9301   | 14.4793    | 1         |
| cg26010182                                                       | CHD1L                         | 0.00070062        | 0.000700619          | 0.299588           | -3.33792                     | T down vs N                            | 17.511  | 13.6078   | 12.4333    | 1         |
| cg26010734                                                       | EPHX3;EPHX3                   | 1.11E-05          | 1.11E-05             | 27.6418            | 27.6418                      | T up vs N                              | 39.344  | 103.196   | 41.9665    | 1         |
| cg26011713                                                       | PCDH19;PCDH19                 | 0.00582859        | 0.00582859           | 3.33606            | 3.33606                      | T up vs N                              | 10.106  | 13.5952   | 21.5233    | 1         |
| cg26012927                                                       | LOC653486;SCGB1C1             | 4.02E-08          | 4.02E-08             | 0.303162           | -3.29857                     | T down vs N                            | 94.67   | 13.3413   | 2.25479    | 1         |
| cg26014197                                                       | ZSCAN10                       | 0.00048267        | 0.000482665          | 0.290719           | -3.43975                     | T down vs N                            | 19.039  | 14.2947   | 12.0133    | 1         |
| CD1E;CD1E;CD1E;CD1E;CD1E;CD1E                                    |                               |                   |                      |                    |                              |                                        |         |           |            |           |
| cg26014409                                                       | CD1E;CD1E;CD1E;CD1E;CD1E;CD1E | 1.84E-06          | 1.84E-06             | 0.16042            | -6.23364                     | T down vs N                            | 53.022  | 31.365    | 9.46474    | 1         |
| cg26015040                                                       | FCER2                         | 5.75E-09          | 5.75E-09             | 0.282755           | -3.53663                     | T down vs N                            | 124.84  | 14.9447   | 1.91546    | 1         |
| cg26016241                                                       | NXNL1                         | 2.69E-07          | 2.69E-07             | 0.06173            | -16.1996                     | T down vs N                            | 71.483  | 72.6453   | 16.2601    | 1         |
| cg26018382                                                       | MOSC1                         | 0.00017187        | 0.000171869          | 3.29746            | 3.29746                      | T up vs N                              | 23.672  | 13.3338   | 9.01245    | 1         |
| cg26019112                                                       | PAX6;PAX6;PAX6                | 6.20E-06          | 6.20E-06             | 12.3289            | 12.3289                      | T up vs N                              | 43.45   | 59.0994   | 21.7626    | 1         |
| cg26019472                                                       | SBNO2                         | 0.00053231        | 0.000532307          | 4.79518            | 4.79518                      | T up vs N                              | 18.63   | 23.0164   | 19.767     | 1         |
| cg26020982                                                       | HRNR                          | 4.89E-06          | 4.89E-06             | 0.177745           | -5.62603                     | T down vs N                            | 45.204  | 27.9479   | 9.89212    | 1         |
| cg26022183                                                       | PAQR6;PAQR6                   | 1.23E-05          | 1.23E-05             | 13.3306            | 13.3306                      | T up vs N                              | 38.642  | 62.8322   | 26.0165    | 1         |
| cg26022526                                                       | HTRA3                         | 0.00021822        | 0.000218219          | 0.212713           | -4.70118                     | T down vs N                            | 22.546  | 22.4387   | 15.9242    | 1         |
| cg26024941                                                       | GRPR                          | 5.86E-06          | 5.86E-06             | 0.320694           | -3.11824                     | T down vs N                            | 43.864  | 12.114    | 4.41871    | 1         |
| cg26029547                                                       | STK19;STK19;DOM3Z;STK19       | 0.00039329        | 0.000393293          | 0.197751           | -5.05687                     | T down vs N                            | 19.909  | 24.6032   | 19.7722    | 1         |
| cg26030770                                                       | OSCP1;OSCP1                   | 6.58E-05          | 6.58E-05             | 0.153325           | -6.52211                     | T down vs N                            | 28.565  | 32.9349   | 18.4475    | 1         |
| cg26031046                                                       | STAT2;APOF                    | 3.61E-05          | 3.61E-05             | 0.152196           | -6.57048                     | T down vs N                            | 31.944  | 33.1949   | 16.6266    | 1         |
| cg26035105                                                       | INHBB                         | 0.00054394        | 0.000543935          | 0.197066           | -5.07443                     | T down vs N                            | 18.541  | 24.7086   | 21.3226    | 1         |
| cg26036678                                                       | USH2A                         | 0.00021137        | 0.000211372          | 0.268135           | -3.72946                     | T down vs N                            | 22.694  | 16.2273   | 11.4408    | 1         |
| cg26037821                                                       | BLOC1S1                       | 0.00050884        | 0.000508835          | 0.32319            | -3.09416                     | T down vs N                            | 18.818  | 11.9494   | 10.1602    | 1         |

| Probeset ID                               | UCSC_REFGENE_NAME             | p-value<br>(Type) | p-value (T vs.<br>N) | Ratio (T<br>vs. N) | Fold-<br>Change (T<br>vs. N) | Fold-Change (T vs.<br>N) (Description) | F(Type) | SS (Type) | SS (Error) | F (Error) |
|-------------------------------------------|-------------------------------|-------------------|----------------------|--------------------|------------------------------|----------------------------------------|---------|-----------|------------|-----------|
| cg26039829                                | PIWIL2;PIWIL2                 | 0.00054201        | 0.000542007          | 3.50867            | 3.50867                      | T up vs N                              | 18.555  | 14.7575   | 12.7251    | 1         |
| cg26040809                                | ADARB2                        | 0.00161477        | 0.00161477           | 0.294257           | -3.39839                     | T down vs N                            | 14.345  | 14.0162   | 15.6331    | 1         |
| cg26043322                                | OR10J5                        | 1.09E-06          | 1.09E-06             | 0.107519           | -9.30067                     | T down vs N                            | 57.632  | 46.5806   | 12.9319    | 1         |
| cg26046924                                | MTMR8                         | 0.00686024        | 0.00686024           | 0.283731           | -3.52447                     | T down vs N                            | 9.6185  | 14.8633   | 24.7247    | 1         |
| cg26048630                                | PRRX1;PRRX1                   | 0.00183292        | 0.00183292           | 10.0704            | 10.0704                      | T up vs N                              | 13.894  | 49.9613   | 57.5343    | 1         |
| cg26056527                                | SLC29A2                       | 0.00018129        | 0.000181289          | 0.281347           | -3.55432                     | T down vs N                            | 23.417  | 15.0631   | 10.292     | 1         |
| cg26059632                                | SPRR2A                        | 1.62E-06          | 1.62E-06             | 0.298337           | -3.35192                     | T down vs N                            | 54.117  | 13.7024   | 4.0512     | 1         |
| cg26060835                                | NCRNA00157                    | 0.00011796        | 0.00011796           | 0.221582           | -4.51299                     | T down vs N                            | 25.518  | 21.2699   | 13.3363    | 1         |
| cg26063719                                | VIM                           | 1.46E-05          | 1.46E-05             | 0.288325           | -3.46831                     | T down vs N                            | 37.531  | 14.4867   | 6.17585    | 1         |
| CLEC7A;CLEC7A;CLEC7A;CLEC7A;CLEC7A;CLEC7A |                               |                   |                      |                    |                              |                                        |         |           |            |           |
| cg26066361                                | 7A;CLEC7A                     | 0.00035069        | 0.000350691          | 0.231413           | -4.32127                     | T down vs N                            | 20.407  | 20.0621   | 15.7296    | 1         |
| cg26066912                                | OBSCN;OBSCN                   | 2.49E-05          | 2.49E-05             | 0.198453           | -5.03897                     | T down vs N                            | 34.152  | 24.4957   | 11.476     | 1         |
| cg26067319                                | UBE2L3;UBE2L3;UBE2L3          | 0.00011637        | 0.000116372          | 0.219797           | -4.54966                     | T down vs N                            | 25.586  | 21.4989   | 13.4439    | 1         |
| cg26069890                                | PSORS1C3                      | 1.66E-05          | 1.66E-05             | 0.241505           | -4.14071                     | T down vs N                            | 36.717  | 18.909    | 8.23988    | 1         |
| cg26079857                                | BAHCC1                        | 0.00061882        | 0.000618822          | 0.305606           | -3.27219                     | T down vs N                            | 18.012  | 13.1624   | 11.6921    | 1         |
| cg26084141                                | PDIA5;PDIA5                   | 4.18E-05          | 4.18E-05             | 0.327668           | -3.05187                     | T down vs N                            | 31.091  | 11.66     | 6.00051    | 1         |
| cg26086902                                | MYH13                         | 0.00032654        | 0.000326538          | 0.178946           | -5.58829                     | T down vs N                            | 20.72   | 27.7305   | 21.4131    | 1         |
| cg26089160                                | PSD                           | 0.00045334        | 0.000453343          | 6.68609            | 6.68609                      | T up vs N                              | 19.303  | 33.8129   | 28.0276    | 1         |
| cg26089753                                | ESR1;ESR1;ESR1;ESR1           | 0.00021317        | 0.000213169          | 0.189698           | -5.27153                     | T down vs N                            | 22.655  | 25.8816   | 18.2792    | 1         |
| cg26090020                                | C17orf102                     | 0.00023044        | 0.00023044           | 0.250916           | -3.9854                      | T down vs N                            | 22.293  | 17.9052   | 12.8506    | 1         |
| cg26090072                                | RTKN                          | 0.00032872        | 0.000328721          | 5.36178            | 5.36178                      | T up vs N                              | 20.691  | 26.4129   | 20.4246    | 1         |
| cg26091183                                | LOC100294362                  | 1.52E-06          | 1.52E-06             | 0.07828            | -12.7747                     | T down vs N                            | 54.636  | 60.7825   | 17.8       | 1         |
| cg26092675                                | HIST1H3E                      | 4.56E-06          | 4.56E-06             | 26.2673            | 26.2673                      | T up vs N                              | 45.74   | 100.049   | 34.9973    | 1         |
| cg26093711                                | VRK2;VRK2;VRK2;VRK2;VRK2;VRK2 | 0.00015874        | 0.000158738          | 0.220102           | -4.54334                     | T down vs N                            | 24.054  | 21.4595   | 14.274     | 1         |
| cg26094842                                | VTI1A                         | 6.17E-06          | 6.17E-06             | 0.235914           | -4.23883                     | T down vs N                            | 43.48   | 19.5375   | 7.18945    | 1         |
| cg26097391                                | SPTBN1                        | 0.0003551         | 0.000355097          | 0.218326           | -4.5803                      | T down vs N                            | 20.352  | 21.6899   | 17.0514    | 1         |
| cg26101277                                | CCL1                          | 1.52E-05          | 1.52E-05             | 0.288417           | -3.4672                      | T down vs N                            | 37.264  | 14.4793   | 6.21688    | 1         |
| cg26102475                                | GMFG                          | 1.64E-05          | 1.64E-05             | 0.236807           | -4.22285                     | T down vs N                            | 36.76   | 19.4354   | 8.45952    | 1         |
| cg26105558                                | GCNT7                         | 8.29E-06          | 8.29E-06             | 0.299735           | -3.33628                     | T down vs N                            | 41.371  | 13.5967   | 5.25839    | 1         |
| cg26105649                                | C1orf57                       | 0.00016576        | 0.00016576           | 0.300834           | -3.32409                     | T down vs N                            | 23.846  | 13.5141   | 9.06779    | 1         |
| cg26105956                                | SHE                           | 0.0010107         | 0.0010107            | 0.24037            | -4.16026                     | T down vs N                            | 16.08   | 19.0346   | 18.9404    | 1         |
| cg26108843                                | ERG;ERG                       | 7.57E-05          | 7.57E-05             | 0.202817           | -4.93055                     | T down vs N                            | 27.809  | 23.8412   | 13.7172    | 1         |
| cg26110281                                | OR10G4                        | 1.96E-06          | 1.96E-06             | 0.219964           | -4.54619                     | T down vs N                            | 52.487  | 21.4773   | 6.54708    | 1         |
| cg26110883                                | CRIP1                         | 0.00015815        | 0.000158148          | 8.39392            | 8.39392                      | T up vs N                              | 24.072  | 42.394    | 28.1776    | 1         |
| cg26111327                                | ACAP2                         | 0.0006824         | 0.000682396          | 0.288793           | -3.46269                     | T down vs N                            | 17.617  | 14.449    | 13.1228    | 1         |
| cg26113278                                | LDLRAD1                       | 0.00011501        | 0.00011501           | 0.302169           | -3.30941                     | T down vs N                            | 25.646  | 13.4147   | 8.36927    | 1         |
| CHCHD7;CHCHD7;CHCHD7;CHCHD7;C             |                               |                   |                      |                    |                              |                                        |         |           |            |           |
| cg26115370                                | HCHD7;CHCHD7                  | 0.00032751        | 0.000327512          | 0.276307           | -3.61917                     | T down vs N                            | 20.707  | 15.4956   | 11.9731    | 1         |
| cg26116260                                | GRPEL1;GRPEL1                 | 0.00018867        | 0.000188672          | 0.093055           | -10.7463                     | T down vs N                            | 36.698  | 32.007    | 7.84965    | 1         |
| cg26117265                                | ARHGAP22                      | 6.40E-05          | 6.40E-05             | 7.51947            | 7.51947                      | T up vs N                              | 28.716  | 38.123    | 21.2418    | 1         |
| cg26118553                                | APOB                          | 0.00043436        | 0.000434364          | 0.306139           | -3.26649                     | T down vs N                            | 19.484  | 13.1237   | 10.777     | 1         |
| cg26118943                                | SNX18;SNX18;SNX18;SNX18       | 4.92E-06          | 4.92E-06             | 0.146626           | -6.82005                     | T down vs N                            | 45.158  | 34.5226   | 12.2317    | 1         |
| cg26119563                                | CR1L                          | 8.49E-06          | 8.49E-06             | 0.131216           | -7.62103                     | T down vs N                            | 41.205  | 38.6317   | 15.0007    | 1         |
| cg26125690                                | DLC1;DLC1                     | 2.59E-05          | 2.59E-05             | 0.221277           | -4.51923                     | T down vs N                            | 33.912  | 21.3089   | 10.0538    | 1         |
| cg26126417                                | GPR126;GPR126;GPR126;GPR126   | 9.08E-06          | 9.08E-06             | 0.115164           | -8.68324                     | T down vs N                            | 40.739  | 43.7552   | 17.1844    | 1         |
| cg26127836                                | H2AFJ;H2AFJ                   | 0.00492544        | 0.00492544           | 3.40398            | 3.40398                      | T up vs N                              | 10.622  | 14.0538   | 21.1695    | 1         |
| cg26130383                                | ARGFX                         | 0.00051764        | 0.000517641          | 0.274675           | -3.64066                     | T down vs N                            | 18.746  | 15.6386   | 13.3476    | 1         |
| cg26130864                                | SLC4A11                       | 2.38E-05          | 2.38E-05             | 0.301303           | -3.31892                     | T down vs N                            | 34.429  | 13.4792   | 6.26411    | 1         |
| cg26132493                                | WSCD2                         | 0.0008798         | 0.000879796          | 3.28295            | 3.28295                      | T up vs N                              | 16.614  | 13.2354   | 12.7466    | 1         |
| cg26132737                                | ANKRD44                       | 0.0002162         | 0.000216203          | 7.12052            | 7.12052                      | T up vs N                              | 22.589  | 36.0906   | 25.5636    | 1         |
| cg26133399                                | FAM19A2                       | 0.00099742        | 0.000997424          | 0.296496           | -3.37273                     | T down vs N                            | 16.13   | 13.843    | 13.7314    | 1         |
| cg26135325                                | LCE3A                         | 1.30E-06          | 1.30E-06             | 0.2228             | -4.48834                     | T down vs N                            | 56.004  | 21.1155   | 6.03264    | 1         |
| cg26135441                                | JAKMIP1;JAKMIP1               | 0.00032976        | 0.000329761          | 0.264277           | -3.78391                     | T down vs N                            | 20.677  | 16.5867   | 12.8348    | 1         |
| cg26136776                                | KLF1                          | 0.00010027        | 0.000100269          | 0.317844           | -3.1462                      | T down vs N                            | 26.343  | 12.3049   | 7.47364    | 1         |
| PSG11;PSG11;PSG11;PSG11;PSG11;PS          |                               |                   |                      |                    |                              |                                        |         |           |            |           |
| cg26140182                                | G11                           | 0.00085184        | 0.000851843          | 0.237715           | -4.20672                     | T down vs N                            | 16.739  | 19.3323   | 18.4785    | 1         |
| cg26140293                                | SYT7                          | 0.00396397        | 0.00396397           | 3.16694            | 3.16694                      | T up vs N                              | 11.304  | 12.4464   | 17.6164    | 1         |
| cg26141247                                | PPP4R4;PPP4R4                 | 0.00169028        | 0.00169028           | 0.275448           | -3.63045                     | T down vs N                            | 14.182  | 15.5707   | 17.5673    | 1         |
| cg26144456                                | NXT2                          | 0.00132878        | 0.00132878           | 0.108046           | -9.25536                     | T down vs N                            | 15.054  | 46.3768   | 49.2915    | 1         |
| cg26148774                                | OR10P1                        | 4.78E-06          | 4.78E-06             | 0.183483           | -5.45009                     | T down vs N                            | 45.372  | 26.9293   | 9.49634    | 1         |
| cg26150142                                | OR2L13                        | 0.00030679        | 0.000306791          | 0.239412           | -4.17691                     | T down vs N                            | 20.997  | 19.1414   | 14.5861    | 1         |
| cg26151206                                | OR10K2                        | 3.63E-06          | 3.63E-06             | 0.078167           | -12.7931                     | T down vs N                            | 47.489  | 60.8512   | 20.5021    | 1         |
| cg26154631                                | AOAH                          | 2.73E-06          | 2.73E-06             | 0.241148           | -4.14683                     | T down vs N                            | 49.757  | 18.9483   | 6.09305    | 1         |
| cg26154937                                | ARHGAP22                      | 0.00026466        | 0.000264662          | 4.91416            | 4.91416                      | T up vs N                              | 21.66   | 23.7418   | 17.5378    | 1         |
| cg26155152                                | ZNF77                         | 0.00010417        | 0.000104172          | 0.272908           | -3.66424                     | T down vs N                            | 26.148  | 15.7952   | 9.66523    | 1         |
| cg26158528                                | SESN2                         | 4.43E-05          | 4.43E-05             | 0.248228           | -4.02856                     | T down vs N                            | 30.76   | 18.1852   | 9.45904    | 1         |
| cg26160008                                | TNFRSF1A;TNFRSF1A             | 2.24E-05          | 2.24E-05             | 0.308154           | -3.24513                     | T down vs N                            | 34.811  | 12.9787   | 5.96531    | 1         |
| cg26162295                                | GSDMA                         | 0.000159          | 0.000159003          | 0.286504           | -3.49036                     | T down vs N                            | 24.046  | 14.6347   | 9.73768    | 1         |
| cg26163057                                | SPDYA;SPDYA;SPDYA             | 0.00011522        | 0.000115219          | 0.304173           | -3.2876                      | T down vs N                            | 25.637  | 13.267    | 8.28003    | 1         |
| MAPT;MAPT;MAPT;MAPT;MAPT;MAP              |                               |                   |                      |                    |                              |                                        |         |           |            |           |
| cg26163368                                | T                             | 0.0010427         | 0.0010427            | 7.71973            | 7.71973                      | T up vs N                              | 15.961  | 39.1227   | 39.2186    | 1         |
| cg26164798                                | TBX15                         | 7.19E-05          | 7.19E-05             | 0.29843            | -3.35087                     | T down vs N                            | 28.085  | 13.6953   | 7.80235    | 1         |

| Probeset ID | UCSC_REFGENE_NAME                            | p-value<br>(Type) | p-value (T vs.<br>N) | Ratio (T<br>vs. N) | Fold-<br>Change (T<br>vs. N) | Fold-Change (T vs.<br>N) (Description) | F(Type) | SS (Type) | SS (Error) | F (Error) |
|-------------|----------------------------------------------|-------------------|----------------------|--------------------|------------------------------|----------------------------------------|---------|-----------|------------|-----------|
| cg26168651  | NOS3                                         | 0.00025339        | 0.00025339           | 4.22288            | 4.22288                      | T up vs N                              | 21.858  | 19.4356   | 14.2269    | 1         |
| cg26168881  | ASAP2;ASAP2                                  | 2.71E-06          | 2.71E-06             | 0.302724           | -3.30334                     | T down vs N                            | 49.813  | 13.3736   | 4.29563    | 1         |
| cg26170604  | NXPH1                                        | 1.37E-05          | 1.37E-05             | 85.0683            | 85.0683                      | T up vs N                              | 37.934  | 184.928   | 78.0004    | 1         |
| cg26170660  | GPX5;GPX5                                    | 0.00643182        | 0.00643182           | 0.256937           | -3.89201                     | T down vs N                            | 9.8103  | 17.2963   | 28.2093    | 1         |
| cg26172504  | KLK7;KLK7                                    | 0.00274298        | 0.00274298           | 0.32091            | -3.11614                     | T down vs N                            | 12.508  | 12.0997   | 15.4781    | 1         |
| cg26172812  | TMEM143                                      | 0.00134617        | 0.00134617           | 3.58069            | 3.58069                      | T up vs N                              | 15.006  | 15.2391   | 16.2485    | 1         |
| cg26174928  | CBR4                                         | 0.00062007        | 0.000620072          | 0.331485           | -3.01673                     | T down vs N                            | 18.004  | 11.4192   | 10.1483    | 1         |
| cg26183708  | MUC21                                        | 0.0002154         | 0.000215401          | 0.327789           | -3.05074                     | T down vs N                            | 22.606  | 11.6523   | 8.24721    | 1         |
| cg26185508  | CDCP2                                        | 2.24E-05          | 2.24E-05             | 0.220014           | -4.54517                     | T down vs N                            | 34.807  | 21.4709   | 9.86983    | 1         |
| cg26186239  | EEF1A2                                       | 8.57E-05          | 8.57E-05             | 3.97909            | 3.97909                      | T up vs N                              | 27.157  | 17.8642   | 10.5249    | 1         |
| cg26186954  | PSKH2                                        | 6.41E-05          | 6.41E-05             | 3.25253            | 3.25253                      | T up vs N                              | 28.704  | 13.0289   | 7.26253    | 1         |
| cg26188726  | TRIM72                                       | 1.52E-06          | 1.52E-06             | 7.07541            | 7.07541                      | T up vs N                              | 54.658  | 35.8572   | 10.4966    | 1         |
| cg26190514  | C1orf172                                     | 0.0027809         | 0.0027809            | 0.314098           | -3.18372                     | T down vs N                            | 12.462  | 12.5607   | 16.1271    | 1         |
| cg26191471  | FOXN4                                        | 2.35E-05          | 2.35E-05             | 0.245466           | -4.07389                     | T down vs N                            | 34.521  | 18.4785   | 8.56443    | 1         |
| cg26196133  | GRPR                                         | 4.89E-05          | 4.89E-05             | 0.180371           | -5.54411                     | T down vs N                            | 30.2    | 27.4753   | 14.5563    | 1         |
| cg26200239  | SCN4B;SCN4B;SCN4B;SCN4B                      | 0.00087383        | 0.000873832          | 0.282991           | -3.53368                     | T down vs N                            | 16.64   | 14.925    | 14.351     | 1         |
| cg26200378  | KIAA0652;KIAA0652;KIAA0652;KIAA0652;KIAA0652 | 1.66E-06          | 1.66E-06             | 0.212393           | -4.70825                     | T down vs N                            | 53.893  | 22.4824   | 6.67465    | 1         |
| cg26201434  | GALNT10                                      | 0.0003316         | 0.000331595          | 0.331564           | -3.01601                     | T down vs N                            | 20.653  | 11.4143   | 8.84286    | 1         |
| cg26202762  | SNORD115-10                                  | 0.00251251        | 0.00251251           | 0.280869           | -3.56038                     | T down vs N                            | 12.803  | 15.1035   | 18.8746    | 1         |
| cg26208159  | OR4X2                                        | 2.05E-06          | 2.05E-06             | 0.256041           | -3.90562                     | T down vs N                            | 52.121  | 17.3853   | 5.33691    | 1         |
| cg26213458  | ANO2                                         | 0.00012589        | 0.000125893          | 0.175019           | -5.71366                     | T down vs N                            | 25.193  | 28.4503   | 18.069     | 1         |
| cg26216876  | SLMO2                                        | 0.00685084        | 0.00685084           | 0.298773           | -3.34702                     | T down vs N                            | 9.6225  | 13.6693   | 22.7289    | 1         |
| cg26221105  | CAPN2;CAPN2                                  | 2.62E-05          | 2.62E-05             | 0.295665           | -3.38221                     | T down vs N                            | 33.838  | 13.907    | 6.57585    | 1         |
| cg26222247  | ANPEP                                        | 0.00025951        | 0.000259513          | 4.28595            | 4.28595                      | T up vs N                              | 21.749  | 19.8377   | 14.5938    | 1         |
| cg26225893  | MUC13                                        | 0.00017261        | 0.000172613          | 0.30831            | -3.24349                     | T down vs N                            | 23.651  | 12.9675   | 8.77252    | 1         |
| cg26226555  | SLC9A9                                       | 2.74E-05          | 2.74E-05             | 0.218986           | -4.56651                     | T down vs N                            | 33.564  | 21.604    | 10.2985    | 1         |
| cg26226988  | MUC6                                         | 7.60E-05          | 7.60E-05             | 0.16773            | -5.96197                     | T down vs N                            | 27.792  | 29.8561   | 17.1885    | 1         |
| cg26230651  | LOC440839                                    | 0.0002994         | 0.000299398          | 4.0388             | 4.0388                       | T up vs N                              | 21.106  | 18.2515   | 13.8364    | 1         |
| cg26231267  | CAMK1D;CAMK1D                                | 3.96E-06          | 3.96E-06             | 0.190856           | -5.23956                     | T down vs N                            | 46.819  | 25.6925   | 8.78025    | 1         |
| cg26233832  | KEL                                          | 0.00042898        | 0.000428979          | 0.206992           | -4.8311                      | T down vs N                            | 19.537  | 23.2361   | 19.0292    | 1         |
| cg26234885  | MEPCE                                        | 0.00012842        | 0.00012842           | 0.30093            | -3.32303                     | T down vs N                            | 25.094  | 13.507    | 8.61221    | 1         |
| cg26236235  | ODC1                                         | 0.00017974        | 0.000179742          | 0.251385           | -3.97797                     | T down vs N                            | 23.458  | 17.8569   | 12.1797    | 1         |
| cg26237595  | OPCML                                        | 0.00096289        | 0.000962891          | 0.330852           | -3.0225                      | T down vs N                            | 16.265  | 11.4588   | 11.2721    | 1         |
| cg26238936  | ARHGAP25;ARHGAP25;ARHGAP25;ARHGAP25          | 5.76E-07          | 5.76E-07             | 0.079417           | -12.5917                     | T down vs N                            | 63.618  | 60.096    | 15.1142    | 1         |
| cg26239233  | CIITA                                        | 2.37E-05          | 2.37E-05             | 0.227153           | -4.40231                     | T down vs N                            | 34.45   | 20.5747   | 9.55586    | 1         |
| cg26239816  | CRYBB2                                       | 4.42E-05          | 4.42E-05             | 0.194151           | -5.15062                     | T down vs N                            | 30.766  | 25.1641   | 13.0867    | 1         |
| cg26241650  | FAM83F                                       | 0.0010488         | 0.0010488            | 0.24331            | -4.10998                     | T down vs N                            | 15.939  | 18.7113   | 18.7832    | 1         |
| cg26242772  | MIR1283-2                                    | 1.12E-05          | 1.12E-05             | 0.294356           | -3.39725                     | T down vs N                            | 39.29   | 14.0085   | 5.7046     | 1         |
| cg26244013  | SCNN1A;SCNN1A;SCNN1A                         | 7.41E-07          | 7.41E-07             | 0.180326           | -5.5455                      | T down vs N                            | 61.186  | 27.4833   | 7.18682    | 1         |
| cg26244109  | STAC3                                        | 0.00280634        | 0.00280634           | 0.325946           | -3.06799                     | T down vs N                            | 12.431  | 11.7704   | 15.1493    | 1         |
| cg26244164  | DLC1;DLC1                                    | 0.00026857        | 0.00026857           | 0.280537           | -3.56459                     | T down vs N                            | 21.594  | 15.1317   | 11.2119    | 1         |
| cg26244646  | BCAS3;BCAS3                                  | 0.00583159        | 0.00583159           | 0.251463           | -3.97673                     | T down vs N                            | 10.105  | 17.8488   | 28.2618    | 1         |
| cg26246880  | PYHIN1;PYHIN1;PYHIN1;PYHIN1                  | 2.89E-07          | 2.89E-07             | 0.112744           | -8.86962                     | T down vs N                            | 70.708  | 44.6193   | 10.0965    | 1         |
| cg26249450  | ETV7                                         | 1.96E-05          | 1.96E-05             | 14.2317            | 14.2317                      | T up vs N                              | 35.65   | 66.0457   | 29.642     | 1         |
| cg26249834  | NID2                                         | 9.67E-05          | 9.67E-05             | 0.235714           | -4.24243                     | T down vs N                            | 26.532  | 19.5605   | 11.796     | 1         |
| cg26250585  | MS4A6A;MS4A6A;MS4A6A                         | 0.00085915        | 0.000859147          | 0.23168            | -4.3163                      | T down vs N                            | 16.706  | 20.0306   | 19.1841    | 1         |
| cg26252641  | C12orf56;C12orf56                            | 0.00395801        | 0.00395801           | 0.298984           | -3.34466                     | T down vs N                            | 11.309  | 13.6533   | 19.3164    | 1         |
| cg26257634  | CEACAM5                                      | 1.09E-05          | 1.09E-05             | 0.202215           | -4.94524                     | T down vs N                            | 39.467  | 23.9302   | 9.70133    | 1         |
| cg26257822  | EMX2OS                                       | 0.0008125         | 0.000812504          | 0.146715           | -6.81595                     | T down vs N                            | 16.924  | 34.501    | 32.6168    | 1         |
| cg26257969  | H1FNT                                        | 2.35E-05          | 2.35E-05             | 0.211847           | -4.72039                     | T down vs N                            | 34.519  | 22.5572   | 10.4555    | 1         |
| cg26258396  | OR3A2                                        | 0.00011749        | 0.000117492          | 0.230457           | -4.3392                      | T down vs N                            | 25.538  | 20.1758   | 12.6404    | 1         |
| cg26259568  | HLA-B                                        | 0.0057023         | 0.0057023            | 4.41477            | 4.41477                      | T up vs N                              | 10.173  | 20.6533   | 32.4839    | 1         |
| cg26261873  | RYBP                                         | 0.00214303        | 0.00214303           | 3.06656            | 3.06656                      | T up vs N                              | 13.348  | 11.7606   | 14.0975    | 1         |
| cg26262157  | PFKFB3                                       | 7.46E-05          | 7.46E-05             | 0.273977           | -3.64993                     | T down vs N                            | 27.887  | 15.7002   | 9.00801    | 1         |
| cg26262482  | CACHD1                                       | 3.00E-05          | 3.00E-05             | 0.280397           | -3.56637                     | T down vs N                            | 33.025  | 15.1435   | 7.33668    | 1         |
| cg26263234  | LRRC3B                                       | 1.67E-05          | 1.67E-05             | 25.5738            | 25.5738                      | T up vs N                              | 36.679  | 98.4173   | 42.9309    | 1         |
| cg26264008  | TGM4;TGM4                                    | 1.17E-05          | 1.17E-05             | 0.229198           | -4.36304                     | T down vs N                            | 39.009  | 20.3267   | 8.33733    | 1         |
| cg26267259  | PTPRN2;PTPRN2;PTPRN2                         | 0.00519102        | 0.00519102           | 0.257673           | -3.88088                     | T down vs N                            | 10.46   | 17.2235   | 26.346     | 1         |
| cg26269802  | MYO1F                                        | 7.30E-07          | 7.30E-07             | 0.093781           | -10.6632                     | T down vs N                            | 61.34   | 52.4668   | 13.6856    | 1         |
| cg26270195  | B3GALT4                                      | 0.00143573        | 0.00143573           | 3.65857            | 3.65857                      | T up vs N                              | 14.77   | 15.7576   | 17.0695    | 1         |
| cg26272125  | TMEM222                                      | 9.71E-06          | 9.71E-06             | 0.183213           | -5.45812                     | T down vs N                            | 40.27   | 26.976    | 10.7182    | 1         |
| cg26272425  | RBM11                                        | 2.85E-05          | 2.85E-05             | 0.220826           | -4.52846                     | T down vs N                            | 33.331  | 21.3666   | 10.2566    | 1         |
| cg26276014  | CUBN                                         | 0.00187113        | 0.00187113           | 0.307872           | -3.2481                      | T down vs N                            | 13.821  | 12.9988   | 15.0479    | 1         |
| cg26276650  | KLF11                                        | 0.00618788        | 0.00618788           | 4.26698            | 4.26698                      | T up vs N                              | 9.9261  | 19.171    | 31.7822    | 1         |
| cg26276947  | LDOC1L                                       | 0.00162689        | 0.00162689           | 0.309162           | -3.23455                     | T down vs N                            | 14.318  | 12.9068   | 14.4227    | 1         |
| cg26277026  | ST8SIA1                                      | 0.00284375        | 0.00284375           | 0.069664           | -14.3547                     | T down vs N                            | 12.387  | 66.4745   | 85.8626    | 1         |
| cg26278103  | GPR37                                        | 0.00272821        | 0.00272821           | 3.98457            | 3.98457                      | T up vs N                              | 12.526  | 17.8998   | 22.8646    | 1         |
| cg26279282  | LDHAL6A;LDHAL6A                              | 0.00048983        | 0.000489826          | 0.275431           | -3.63067                     | T down vs N                            | 18.977  | 15.5722   | 13.1295    | 1         |
| cg26279550  | IRAK3;IRAK3                                  | 0.00352915        | 0.00352915           | 10.1224            | 10.1224                      | T up vs N                              | 11.678  | 50.1845   | 68.7591    | 1         |
| cg26279840  | IKBK;G6PD;G6PD                               | 5.22E-05          | 5.22E-05             | 0.197892           | -5.05326                     | T down vs N                            | 29.833  | 24.5815   | 13.1834    | 1         |

| Probeset ID | UCSC_REFGENE_NAME                                                                               | p-value<br>(Type) | p-value (T vs.<br>N) | Ratio (T<br>vs. N) | Fold-<br>Change (T<br>vs. N) | Fold-Change (T vs.<br>N) (Description) | F(Type) | SS (Type) | SS (Error) | F (Error) |
|-------------|-------------------------------------------------------------------------------------------------|-------------------|----------------------|--------------------|------------------------------|----------------------------------------|---------|-----------|------------|-----------|
|             | PCDHGA4;PCDHGA6;PCDHGA1;PCDHGA5;PCDHGB1;PCDHGA3;PCDHGA2;PCDHGB4;PCDHGA7;PCDHGB2;PCDHGB4         |                   |                      |                    |                              |                                        |         |           |            |           |
| cg26282384  |                                                                                                 | 0.00013071        | 0.000130708          | 6.118              | 6.118                        | T up vs N                              | 25.006  | 30.7264   | 19.6601    | 1         |
| cg26283507  | PKD1L1                                                                                          | 0.0064505         | 0.0064505            | 0.329691           | -3.03314                     | T down vs N                            | 9.8016  | 11.5317   | 18.8242    | 1         |
| cg26283559  | MS4A13;MS4A13                                                                                   | 1.98E-05          | 1.98E-05             | 0.197889           | -5.05335                     | T down vs N                            | 35.563  | 24.5821   | 11.0597    | 1         |
| cg26284390  | FAM55C;FAM55C;NFKBIZ                                                                            | 0.00173725        | 0.00173725           | 0.212671           | -4.7021                      | T down vs N                            | 14.084  | 22.4445   | 25.4979    | 1         |
| cg26287345  | MYL9;MYL9                                                                                       | 0.00047001        | 0.000470008          | 8.13877            | 8.13877                      | T up vs N                              | 19.15   | 41.1727   | 34.3997    | 1         |
| cg26288991  | EMX2OS                                                                                          | 0.00075316        | 0.000753161          | 0.205459           | -4.86716                     | T down vs N                            | 17.223  | 23.456    | 21.7899    | 1         |
| cg26289436  | CD37;CD37                                                                                       | 0.00139821        | 0.00139821           | 3.50157            | 3.50157                      | T up vs N                              | 14.867  | 14.7099   | 15.8309    | 1         |
| cg26289871  | LPIN3                                                                                           | 0.00528716        | 0.00528716           | 3.74291            | 3.74291                      | T up vs N                              | 10.874  | 14.5033   | 18.672     | 1         |
| cg26292028  | MYO1H                                                                                           | 0.00056653        | 0.000566527          | 3.11007            | 3.11007                      | T up vs N                              | 18.373  | 12.0582   | 10.5008    | 1         |
| cg26295328  | CASC4;CASC4;CASC4;CASC4                                                                         | 0.00012095        | 0.000120945          | 3.22589            | 3.22589                      | T up vs N                              | 25.393  | 12.8478   | 8.09538    | 1         |
| cg26296957  | FLJ39653;FLJ39653                                                                               | 2.39E-05          | 2.39E-05             | 0.177946           | -5.61969                     | T down vs N                            | 34.395  | 27.9114   | 12.9841    | 1         |
| cg26297005  | HOXA3                                                                                           | 0.00248239        | 0.00248239           | 8.33917            | 8.33917                      | T up vs N                              | 12.844  | 42.1335   | 52.4861    | 1         |
| cg26299044  | KRT12                                                                                           | 4.92E-06          | 4.92E-06             | 0.060704           | -16.4733                     | T down vs N                            | 45.157  | 73.522    | 26.0502    | 1         |
| cg26300857  | KCNAB2;KCNAB2                                                                                   | 0.00012689        | 0.000126888          | 0.317537           | -3.14924                     | T down vs N                            | 25.153  | 12.3257   | 7.84031    | 1         |
|             | FAM123C;FAM123C;FAM123C;FAM123C                                                                 |                   |                      |                    |                              |                                        |         |           |            |           |
| cg26301353  | 3C                                                                                              | 0.00231011        | 0.00231011           | 3.04522            | 3.04522                      | T up vs N                              | 13.089  | 11.6144   | 14.1972    | 1         |
| cg26302157  | LCE1F                                                                                           | 0.00012055        | 0.00012055           | 0.257781           | -3.87926                     | T down vs N                            | 25.409  | 17.2129   | 10.8388    | 1         |
| cg26303165  | OBSCN;OBSCN                                                                                     | 1.09E-05          | 1.09E-05             | 39.1882            | 39.1882                      | T up vs N                              | 39.492  | 126.04    | 51.0647    | 1         |
| cg26306056  | HLA-DOA                                                                                         | 0.00041872        | 0.000418718          | 0.321701           | -3.10848                     | T down vs N                            | 19.641  | 12.0473   | 9.81425    | 1         |
| cg26306476  | PRR22;PRR22                                                                                     | 0.00028542        | 0.000285421          | 0.313712           | -3.18763                     | T down vs N                            | 21.319  | 12.5874   | 9.44674    | 1         |
| cg26306893  | SNHG11                                                                                          | 0.00620075        | 0.00620075           | 0.288303           | -3.46857                     | T down vs N                            | 9.9198  | 14.4885   | 23.3689    | 1         |
| cg26308280  | MBD3L1                                                                                          | 0.00441124        | 0.00441124           | 0.276901           | -3.6114                      | T down vs N                            | 10.966  | 15.4439   | 22.5335    | 1         |
| cg26309983  | GBP2                                                                                            | 0.00385802        | 0.00385802           | 0.254954           | -3.92228                     | T down vs N                            | 11.391  | 17.4941   | 24.5726    | 1         |
|             | LTB4R2;LTB4R2;LTB4R2;CIDEB;CIDEB;L                                                              |                   |                      |                    |                              |                                        |         |           |            |           |
| cg26310551  | TB4R                                                                                            | 0.00098218        | 0.000982177          | 4.17731            | 4.17731                      | T up vs N                              | 16.189  | 19.144    | 18.9205    | 1         |
| cg26312149  | TOR1AIP2;TOR1AIP2                                                                               | 4.47E-06          | 4.47E-06             | 0.20775            | -4.81348                     | T down vs N                            | 45.888  | 23.1284   | 8.0643     | 1         |
| cg26313247  | GPX5;GPX5                                                                                       | 0.00016556        | 0.000165558          | 0.134583           | -7.43038                     | T down vs N                            | 23.851  | 37.6739   | 25.2724    | 1         |
| cg26313699  | OR1G1                                                                                           | 0.00061906        | 0.00061906           | 0.220702           | -4.531                       | T down vs N                            | 18.011  | 21.3824   | 18.9956    | 1         |
| cg26314531  | FAM59B                                                                                          | 0.00016916        | 0.000169164          | 31.3164            | 31.3164                      | T up vs N                              | 23.748  | 111.102   | 74.8547    | 1         |
| cg26314765  | ITGB4;ITGB4;ITGB4                                                                               | 0.00078509        | 0.000785086          | 0.211731           | -4.72297                     | T down vs N                            | 17.059  | 22.5731   | 21.1714    | 1         |
| cg26314868  | STMN1;STMN1;STMN1;STMN1                                                                         | 0.00294254        | 0.00294254           | 0.288112           | -3.47087                     | T down vs N                            | 12.274  | 14.5039   | 18.9075    | 1         |
| cg26315984  | TNFSF4                                                                                          | 0.00112844        | 0.00112844           | 0.236697           | -4.22482                     | T down vs N                            | 15.662  | 19.448    | 19.8676    | 1         |
| cg26320006  | TRIO                                                                                            | 6.22E-05          | 6.22E-05             | 0.315093           | -3.17367                     | T down vs N                            | 28.864  | 12.4923   | 6.92469    | 1         |
| cg26322816  | EOMES                                                                                           | 4.69E-08          | 4.69E-08             | 0.197061           | -5.07456                     | T down vs N                            | 92.548  | 24.7094   | 4.27183    | 1         |
| cg26325949  | SYNPO2;SYNPO2;SYNPO2                                                                            | 0.00206548        | 0.00206548           | 0.249606           | -4.00631                     | T down vs N                            | 13.476  | 18.041    | 21.4207    | 1         |
| cg26328611  | EDA2R                                                                                           | 0.00231797        | 0.00231797           | 0.169423           | -5.90237                     | T down vs N                            | 13.078  | 29.521    | 36.1178    | 1         |
| cg26328633  | MIR886                                                                                          | 0.00090489        | 0.00090489           | 3.31912            | 3.31912                      | T up vs N                              | 16.505  | 13.4805   | 13.0684    | 1         |
| cg26329274  | ITK                                                                                             | 5.62E-05          | 5.62E-05             | 0.2101             | -4.75964                     | T down vs N                            | 29.421  | 22.7985   | 12.3983    | 1         |
| cg26329715  | SLC17A9                                                                                         | 0.0010123         | 0.0010123            | 3.73816            | 3.73816                      | T up vs N                              | 16.074  | 16.2849   | 16.2104    | 1         |
| cg26332630  | C14orf2;C14orf2                                                                                 | 0.00227578        | 0.00227578           | 0.299603           | -3.33775                     | T down vs N                            | 13.141  | 13.6066   | 16.5674    | 1         |
| cg26334670  | ALOX12P2                                                                                        | 2.17E-06          | 2.17E-06             | 4.83331            | 4.83331                      | T up vs N                              | 51.645  | 23.2496   | 7.20285    | 1         |
| cg26334801  | FAM163A                                                                                         | 0.00120859        | 0.00120859           | 0.316029           | -3.16426                     | T down vs N                            | 15.405  | 12.4281   | 12.908     | 1         |
| cg26336059  | RAB13                                                                                           | 0.00011313        | 0.000113131          | 0.211282           | -4.733                       | T down vs N                            | 25.729  | 22.6348   | 14.0759    | 1         |
| cg26336935  | KRT16                                                                                           | 0.00036516        | 0.000365155          | 0.32066            | -3.11857                     | T down vs N                            | 20.231  | 12.1163   | 9.58248    | 1         |
| cg26336955  | ZNF678;ZNF678                                                                                   | 2.54E-05          | 2.54E-05             | 0.253994           | -3.9371                      | T down vs N                            | 34.03   | 17.5907   | 8.27061    | 1         |
| cg26339974  | LOR                                                                                             | 1.96E-06          | 1.96E-06             | 0.257309           | -3.88638                     | T down vs N                            | 52.474  | 17.2595   | 5.26268    | 1         |
|             | TSNAX-DISC1;TSNAX-DISC1;TSNAX-DISC1;TSNAX-DISC1;TSNAX-DISC1;TSNAX-DISC1;TSNAX-DISC1;TSNAX-DISC1 |                   |                      |                    |                              |                                        |         |           |            |           |
| cg26340700  |                                                                                                 | 0.00013233        | 0.000132327          | 0.305149           | -3.27708                     | T down vs N                            | 24.945  | 13.1956   | 8.46378    | 1         |
| cg26340968  | MATK                                                                                            | 2.26E-06          | 2.26E-06             | 0.144365           | -6.92691                     | T down vs N                            | 51.287  | 35.084    | 10.9451    | 1         |
| cg26342147  | EMX2OS                                                                                          | 0.00018294        | 0.000182943          | 0.140181           | -7.13365                     | T down vs N                            | 23.374  | 36.1583   | 24.7512    | 1         |
| cg26342535  | LOC100130017                                                                                    | 0.00026547        | 0.000265465          | 0.163085           | -6.13176                     | T down vs N                            | 21.646  | 30.8026   | 22.7679    | 1         |
| cg26342890  | LEPR;LEPR;LEPR                                                                                  | 2.75E-06          | 2.75E-06             | 0.181146           | -5.5204                      | T down vs N                            | 49.688  | 27.338    | 8.80307    | 1         |
| cg26343183  | GRIA1;GRIA1                                                                                     | 0.00018157        | 0.00018157           | 0.314851           | -3.17611                     | T down vs N                            | 23.41   | 12.5089   | 8.54953    | 1         |
| cg26343510  | P2RY6;P2RY6;P2RY6;P2RY6                                                                         | 6.98E-06          | 6.98E-06             | 10.8694            | 10.8694                      | T up vs N                              | 42.592  | 53.3194   | 20.0301    | 1         |
| cg26344776  | SNORD115-40                                                                                     | 0.00059867        | 0.000598667          | 0.267514           | -3.73813                     | T down vs N                            | 18.147  | 16.2846   | 14.358     | 1         |
| cg26346167  | NEK11;NEK11                                                                                     | 3.98E-05          | 3.98E-05             | 0.305348           | -3.27495                     | T down vs N                            | 31.375  | 13.1811   | 6.72195    | 1         |
| cg26348226  | ECE1;ECE1;ECE1                                                                                  | 9.60E-06          | 9.60E-06             | 0.245887           | -4.06691                     | T down vs N                            | 40.352  | 18.4334   | 7.30904    | 1         |
| cg26348514  | WFDC2                                                                                           | 6.27E-06          | 6.27E-06             | 19.723             | 19.723                       | T up vs N                              | 43.366  | 83.2749   | 30.7245    | 1         |
| cg26350373  | PLA2G4F;PLA2G4F                                                                                 | 7.87E-05          | 7.87E-05             | 0.26245            | -3.81026                     | T down vs N                            | 27.605  | 16.7601   | 9.71425    | 1         |
| cg26351354  | IQSEC2;IQSEC2                                                                                   | 0.00321507        | 0.00321507           | 0.314439           | -3.18027                     | T down vs N                            | 11.982  | 12.5373   | 16.7422    | 1         |
| cg26351416  | SH3RF2                                                                                          | 3.98E-08          | 3.98E-08             | 0.224023           | -4.46382                     | T down vs N                            | 94.781  | 20.9617   | 3.53856    | 1         |
| cg26351481  | NLRP8                                                                                           | 4.93E-05          | 4.93E-05             | 0.163421           | -6.11916                     | T down vs N                            | 30.148  | 30.7328   | 16.3105    | 1         |
|             | RAI14;RAI14;RAI14;RAI14;RAI14;RAI14                                                             |                   |                      |                    |                              |                                        |         |           |            |           |
| cg26352006  | 4                                                                                               | 0.00155372        | 0.00155372           | 0.239733           | -4.17132                     | T down vs N                            | 14.484  | 19.1055   | 21.1055    | 1         |
| cg26353877  | APCS                                                                                            | 0.00412502        | 0.00412502           | 0.248509           | -4.024                       | T down vs N                            | 11.178  | 18.1557   | 25.9883    | 1         |
| cg26354750  | LOC100129055                                                                                    | 0.00044201        | 0.00044201           | 0.326419           | -3.06354                     | T down vs N                            | 19.41   | 11.7399   | 9.67748    | 1         |
| cg26358374  | TRPV4;TRPV4                                                                                     | 0.00012157        | 0.000121566          | 0.294771           | -3.39246                     | T down vs N                            | 25.367  | 13.9762   | 8.81523    | 1         |
| cg26359388  | LOC286467                                                                                       | 0.00273369        | 0.00273369           | 0.153926           | -6.49664                     | T down vs N                            | 12.519  | 32.7976   | 41.9171    | 1         |

| Probeset ID                   | UCSC_REFGENE_NAME             | p-value<br>(Type) | p-value (T vs.<br>N) | Ratio (T<br>vs. N) | Fold-<br>Change (T<br>vs. N) | Fold-Change (T vs.<br>N) (Description) | F(Type) | SS (Type) | SS (Error) | F (Error) |
|-------------------------------|-------------------------------|-------------------|----------------------|--------------------|------------------------------|----------------------------------------|---------|-----------|------------|-----------|
| cg26359857                    | ACCN1;ACCN1                   | 1.39E-05          | 1.39E-05             | 0.301399           | -3.31786                     | T down vs N                            | 37.847  | 13.472    | 5.69529    | 1         |
| cg26360792                    | HAAO                          | 0.00017445        | 0.000174452          | 10.7676            | 10.7676                      | T up vs N                              | 23.601  | 52.8994   | 35.8633    | 1         |
| cg26365623                    | OR52A4                        | 0.00016166        | 0.00016166           | 0.201993           | -4.95066                     | T down vs N                            | 23.966  | 23.963    | 15.9978    | 1         |
| cg26365668                    | MRPS18C;HELQ                  | 5.24E-06          | 5.24E-06             | 0.214104           | -4.67063                     | T down vs N                            | 44.691  | 22.2501   | 7.96593    | 1         |
| cg26365742                    | SLC25A40                      | 9.40E-06          | 9.40E-06             | 0.156727           | -6.38051                     | T down vs N                            | 40.493  | 32.1683   | 12.7106    | 1         |
| cg26366833                    | RAB37;CD300LF                 | 7.96E-05          | 7.96E-05             | 0.254832           | -3.92415                     | T down vs N                            | 27.546  | 17.5063   | 10.1685    | 1         |
| cg26368049                    | DAG1;DAG1                     | 0.00528104        | 0.00528104           | 0.32777            | -3.05092                     | T down vs N                            | 10.407  | 11.6535   | 17.9163    | 1         |
| cg26369594                    | HCCA2                         | 9.09E-07          | 9.09E-07             | 0.201059           | -4.97367                     | T down vs N                            | 59.269  | 24.1022   | 6.50652    | 1         |
| cg26370078                    | MUL1                          | 0.00592429        | 0.00592429           | 0.294528           | -3.39526                     | T down vs N                            | 10.057  | 13.995    | 22.2648    | 1         |
| cg26370729                    | F2RL1                         | 0.00016231        | 0.000162314          | 11.5124            | 11.5124                      | T up vs N                              | 23.947  | 55.9191   | 37.3623    | 1         |
| cg26372842                    | OR8S1                         | 0.00117956        | 0.00117956           | 0.321907           | -3.10649                     | T down vs N                            | 15.496  | 12.0337   | 12.4252    | 1         |
| cg26376241                    | SPRED2;SPRED2                 | 0.00068298        | 0.000682981          | 0.277178           | -3.60779                     | T down vs N                            | 17.614  | 15.4198   | 14.0072    | 1         |
| cg26376346                    | TGFBR2;TGFBR2                 | 0.00033962        | 0.000339616          | 0.320309           | -3.12199                     | T down vs N                            | 20.548  | 12.1396   | 9.45288    | 1         |
| cg26384903                    | MYO1F                         | 5.02E-05          | 5.02E-05             | 0.112093           | -8.92117                     | T down vs N                            | 30.051  | 44.8565   | 23.8826    | 1         |
| cg26385074                    | C7orf52                       | 0.00010115        | 0.000101153          | 4.99757            | 4.99757                      | T up vs N                              | 26.298  | 24.2464   | 14.7518    | 1         |
| TMEM176B;TMEM176B;TMEM176A;T  |                               |                   |                      |                    |                              |                                        |         |           |            |           |
| cg26385222                    | MEM176B;TMEM176B;TMEM176B     | 4.39E-05          | 4.39E-05             | 6.16755            | 6.16755                      | T up vs N                              | 30.805  | 31.0007   | 16.1016    | 1         |
| cg26386852                    | CELSR3                        | 0.00017684        | 0.000176838          | 13.3799            | 13.3799                      | T up vs N                              | 23.536  | 63.0115   | 42.8366    | 1         |
| cg26388152                    | CORO6                         | 0.00664682        | 0.00664682           | 3.27527            | 3.27527                      | T up vs N                              | 9.7123  | 13.1833   | 21.7182    | 1         |
| cg26388599                    | ATP6V1H;ATP6V1H;ATP6V1H       | 6.71E-06          | 6.71E-06             | 0.21538            | -4.64296                     | T down vs N                            | 42.875  | 22.0789   | 8.23932    | 1         |
| cg26389316                    | SRGA3;SRGA3                   | 0.00064838        | 0.000648375          | 0.23392            | -4.27497                     | T down vs N                            | 17.823  | 19.7678   | 17.746     | 1         |
| cg26389500                    | DEFB131                       | 3.24E-05          | 3.24E-05             | 0.280166           | -3.56931                     | T down vs N                            | 32.578  | 15.1631   | 7.44715    | 1         |
| cg26389950                    | PCDHB16                       | 0.00115618        | 0.00115618           | 3.33211            | 3.33211                      | T up vs N                              | 15.571  | 13.5684   | 13.9423    | 1         |
| cg26390526                    | FLG                           | 0.00016315        | 0.00016315           | 0.17989            | -5.55894                     | T down vs N                            | 23.922  | 27.5611   | 18.4339    | 1         |
| cg26391832                    | SIX2                          | 0.00351669        | 0.00351669           | 0.284435           | -3.51575                     | T down vs N                            | 11.689  | 14.8049   | 20.2647    | 1         |
| cg26392328                    | PCTP;PCTP                     | 0.0006915         | 0.000691498          | 0.329992           | -3.03037                     | T down vs N                            | 17.564  | 11.5127   | 10.4877    | 1         |
| cg26395813                    | MYLK4                         | 4.44E-06          | 4.44E-06             | 0.281872           | -3.54771                     | T down vs N                            | 45.94   | 15.0189   | 5.23078    | 1         |
| cg26396443                    | BCL11B;BCL11B                 | 1.37E-05          | 1.37E-05             | 0.17123            | -5.84011                     | T down vs N                            | 37.94   | 29.1694   | 12.3013    | 1         |
| cg26396455                    | NXP4                          | 0.00148533        | 0.00148533           | 7.69418            | 7.69418                      | T up vs N                              | 14.647  | 38.996    | 42.5989    | 1         |
| cg26397662                    | SNORD115-14                   | 0.0017279         | 0.0017279            | 0.286648           | -3.4886                      | T down vs N                            | 14.103  | 14.6229   | 16.5897    | 1         |
| cg26398341                    | BAT3;BAT3;BAT3;BAT3           | 1.43E-05          | 1.43E-05             | 0.32632            | -3.06448                     | T down vs N                            | 37.657  | 11.7464   | 4.9909     | 1         |
| cg26398867                    | DNMT3L;DNMT3L                 | 2.76E-05          | 2.76E-05             | 0.163622           | -6.11167                     | T down vs N                            | 33.533  | 30.6912   | 14.6443    | 1         |
| cg26401870                    | NPM2;NPM2                     | 2.90E-05          | 2.90E-05             | 16.2062            | 16.2062                      | T up vs N                              | 33.231  | 72.6666   | 34.9875    | 1         |
| cg26403416                    | TFF2                          | 0.00026196        | 0.00026196           | 0.314117           | -3.18353                     | T down vs N                            | 21.707  | 12.5595   | 9.25763    | 1         |
| cg26403580                    | PRDX3;PRDX3                   | 0.00163978        | 0.00163978           | 0.294685           | -3.39345                     | T down vs N                            | 14.29   | 13.9829   | 15.6561    | 1         |
| cg26404422                    | ETS1;ETS1;ETS1                | 2.23E-05          | 2.23E-05             | 0.178651           | -5.59752                     | T down vs N                            | 34.832  | 27.7838   | 12.7625    | 1         |
| cg26405913                    | UTS2;UTS2                     | 0.00159647        | 0.00159647           | 0.275736           | -3.62665                     | T down vs N                            | 14.386  | 15.5454   | 17.2894    | 1         |
| cg26408888                    | CARKD                         | 1.87E-05          | 1.87E-05             | 0.273005           | -3.66294                     | T down vs N                            | 35.933  | 15.7866   | 7.02929    | 1         |
| cg26410635                    | AMHDH1                        | 0.00024797        | 0.000247974          | 5.14509            | 5.14509                      | T up vs N                              | 21.957  | 25.1312   | 18.3134    | 1         |
| cg26411441                    | HSPA12B                       | 0.00015915        | 0.000159146          | 3.87512            | 3.87512                      | T up vs N                              | 24.042  | 17.1857   | 11.4372    | 1         |
| cg26411702                    | NPM2                          | 0.00124595        | 0.00124595           | 5.76435            | 5.76435                      | T up vs N                              | 15.292  | 28.7393   | 30.0701    | 1         |
| cg26411747                    | TMEM132D                      | 5.16E-05          | 5.16E-05             | 0.237478           | -4.21091                     | T down vs N                            | 29.899  | 19.3591   | 10.3598    | 1         |
| cg26412374                    | ATL3                          | 0.00012197        | 0.000121972          | 0.261575           | -3.82299                     | T down vs N                            | 25.351  | 16.8438   | 10.631     | 1         |
| cg26413174                    | TTC22;TTC22                   | 0.00049537        | 0.00049537           | 4.743              | 4.743                        | T up vs N                              | 18.93   | 22.6963   | 19.1837    | 1         |
| cg26415633                    | KLK1                          | 4.48E-06          | 4.48E-06             | 0.24384            | -4.10105                     | T down vs N                            | 45.868  | 18.6537   | 6.50698    | 1         |
| cg26416887                    | CUX2                          | 5.19E-05          | 5.19E-05             | 0.164521           | -6.07826                     | T down vs N                            | 29.863  | 30.5057   | 16.3446    | 1         |
| RNU5E;RNU5D;CKMT2;CKMT2;CKMT2 |                               |                   |                      |                    |                              |                                        |         |           |            |           |
| cg26416971                    | RNU5E;RNU5D;CKMT2;CKMT2;CKMT2 | 1.88E-05          | 1.88E-05             | 5.596              | 5.596                        | T up vs N                              | 35.909  | 27.775    | 12.3756    | 1         |
| cg26417554                    | RPUSD3;RPUSD3                 | 0.00330592        | 0.00330592           | 0.293149           | -3.41124                     | T down vs N                            | 11.89   | 14.1028   | 18.9772    | 1         |
| cg26419869                    | C1orf14                       | 1.52E-05          | 1.52E-05             | 0.222855           | -4.48721                     | T down vs N                            | 37.276  | 21.1085   | 9.06038    | 1         |
| cg26420013                    | NSUN2;SRD5A1                  | 0.00017017        | 0.000170166          | 0.255407           | -3.91532                     | T down vs N                            | 23.72   | 17.4486   | 11.7699    | 1         |
| cg26420391                    | C1orf68                       | 0.00079596        | 0.000795963          | 0.197914           | -5.05271                     | T down vs N                            | 17.005  | 24.5782   | 23.1255    | 1         |
| cg26426488                    | SLC12A9                       | 0.00020608        | 0.000206079          | 0.254392           | -3.93094                     | T down vs N                            | 22.812  | 17.5506   | 12.3095    | 1         |
| cg26426690                    | CPEB3                         | 4.76E-05          | 4.76E-05             | 3.23026            | 3.23026                      | T up vs N                              | 30.344  | 12.8776   | 6.79011    | 1         |
| cg26426745                    | LOC100132111;C2CD4D           | 4.98E-05          | 4.98E-05             | 6.84409            | 6.84409                      | T up vs N                              | 30.093  | 34.6493   | 18.4224    | 1         |
| cg26427777                    | ZHX2                          | 3.18E-05          | 3.18E-05             | 0.30791            | -3.2477                      | T down vs N                            | 32.691  | 12.9961   | 6.36076    | 1         |
| cg26429629                    | LOC257358                     | 1.32E-05          | 1.32E-05             | 0.277959           | -3.59765                     | T down vs N                            | 38.18   | 15.3522   | 6.43363    | 1         |
| cg26430305                    | C4BPA                         | 3.56E-05          | 3.56E-05             | 0.171425           | -5.83346                     | T down vs N                            | 32.014  | 29.1318   | 14.5595    | 1         |
| cg26431343                    | C22orf28                      | 1.78E-05          | 1.78E-05             | 0.222615           | -4.49207                     | T down vs N                            | 36.265  | 21.1389   | 9.32654    | 1         |
| cg26432088                    | HAVCR1;HAVCR1                 | 1.00E-05          | 1.00E-05             | 0.308516           | -3.24132                     | T down vs N                            | 40.059  | 12.9527   | 5.17341    | 1         |
| cg26442740                    | OR10A7                        | 0.00095323        | 0.000953228          | 0.256496           | -3.8987                      | T down vs N                            | 16.304  | 17.34     | 17.0169    | 1         |
| cg26442810                    | ERBB2IP;LOC100303749;ERBB2IP  | 0.00100552        | 0.00100552           | 0.215447           | -4.64152                     | T down vs N                            | 16.099  | 22.07     | 21.934     | 1         |
| cg26450106                    | CST7                          | 0.00040966        | 0.000409664          | 0.116038           | -8.61785                     | T down vs N                            | 19.734  | 43.4497   | 35.2282    | 1         |
| cg26450801                    | SNTG2                         | 3.69E-05          | 3.69E-05             | 0.119892           | -8.34083                     | T down vs N                            | 31.802  | 42.1414   | 21.2021    | 1         |
| cg26451355                    | GRM1;GRM1                     | 0.00195362        | 0.00195362           | 0.19179            | -5.21405                     | T down vs N                            | 13.67   | 25.5413   | 29.8952    | 1         |
| cg26459372                    | ADCY1                         | 0.00204108        | 0.00204108           | 4.24003            | 4.24003                      | T up vs N                              | 13.517  | 19.5452   | 23.1358    | 1         |
| cg26462055                    | GPR155;GPR155                 | 3.48E-05          | 3.48E-05             | 0.28997            | -3.44864                     | T down vs N                            | 32.157  | 14.3545   | 7.14224    | 1         |
| cg26464446                    | HOXA11                        | 3.79E-06          | 3.79E-06             | 0.244171           | -4.09549                     | T down vs N                            | 47.15   | 18.6179   | 6.31787    | 1         |
| cg26464998                    | SNED1                         | 0.00471058        | 0.00471058           | 0.288559           | -3.4655                      | T down vs N                            | 10.761  | 14.4678   | 21.5125    | 1         |
| cg26465522                    | MAGEC2                        | 0.00035355        | 0.000353546          | 0.176787           | -5.65652                     | T down vs N                            | 20.372  | 28.1231   | 22.0881    | 1         |
| cg26465715                    | CWF19L1                       | 0.00044421        | 0.000444211          | 0.260464           | -3.8393                      | T down vs N                            | 19.389  | 16.9509   | 13.9882    | 1         |

| Probeset ID                                                     | UCSC_REFGENE_NAME             | p-value<br>(Type) | p-value (T vs.<br>N) | Ratio (T<br>vs. N) | Fold-<br>Change (T<br>vs. N) | Fold-Change (T vs.<br>N) (Description) | F(Type) | SS (Type) | SS (Error) | F (Error) |
|-----------------------------------------------------------------|-------------------------------|-------------------|----------------------|--------------------|------------------------------|----------------------------------------|---------|-----------|------------|-----------|
| cg26466258                                                      | LRRC14B                       | 0.00126833        | 0.00126833           | 0.229651           | -4.35442                     | T down vs N                            | 15.226  | 20.2722   | 21.3029    | 1         |
| cg26467471                                                      | DIP2C                         | 0.0001354         | 0.000135404          | 3.71663            | 3.71663                      | T up vs N                              | 24.831  | 16.1425   | 10.4013    | 1         |
| cg26468478                                                      | CELSR3                        | 4.70E-06          | 4.70E-06             | 19.0965            | 19.0965                      | T up vs N                              | 45.508  | 81.4816   | 28.6476    | 1         |
| cg26474014                                                      | GRP;GRP;GRP                   | 3.60E-07          | 3.60E-07             | 0.228243           | -4.3813                      | T down vs N                            | 68.39   | 20.4421   | 4.78248    | 1         |
| cg26474127                                                      | PRHOXNB                       | 3.20E-05          | 3.20E-05             | 0.200845           | -4.97895                     | T down vs N                            | 32.652  | 24.1341   | 11.826     | 1         |
| cg26475911                                                      | KCTD2                         | 7.50E-05          | 7.50E-05             | 7.71832            | 7.71832                      | T up vs N                              | 27.862  | 39.1158   | 22.4623    | 1         |
| cg26476574                                                      | ACBD5;ACBD5;ACBD5             | 3.82E-05          | 3.82E-05             | 0.208384           | -4.79882                     | T down vs N                            | 31.613  | 23.0388   | 11.6606    | 1         |
| cg26477549                                                      | CKAP4                         | 1.99E-06          | 1.99E-06             | 0.19354            | -5.1669                      | T down vs N                            | 52.351  | 25.2611   | 7.7205     | 1         |
| cg26479028                                                      | HSD17B2                       | 0.00037212        | 0.000372124          | 0.304075           | -3.28867                     | T down vs N                            | 20.149  | 13.2742   | 10.541     | 1         |
| cg26479279                                                      | NCKAP5;NCKAP5                 | 6.27E-05          | 6.27E-05             | 0.217485           | -4.59802                     | T down vs N                            | 28.82   | 21.8001   | 12.1027    | 1         |
| cg26485003                                                      | GRIP1                         | 0.00072733        | 0.00072733           | 0.297928           | -3.35652                     | T down vs N                            | 17.362  | 13.7335   | 12.6561    | 1         |
| PCDHGA4;PCDHGA9;PCDHGA1;PCDHG<br>B1;PCDHGB6;PCDHGB3;PCDHGA11;PC |                               |                   |                      |                    |                              |                                        |         |           |            |           |
| cg26485937                                                      | DHGB7;PCDHGA6;PCDHGA8;PCDHGA  | 0.00605676        | 0.00605676           | 3.39785            | 3.39785                      | T up vs N                              | 9.9905  | 14.0125   | 22.4414    | 1         |
| cg26486069                                                      | RBM3                          | 0.00013839        | 0.000138388          | 0.265998           | -3.75943                     | T down vs N                            | 24.724  | 16.4253   | 10.6295    | 1         |
| cg26489108                                                      | DMRT3                         | 4.40E-06          | 4.40E-06             | 0.109719           | -9.11418                     | T down vs N                            | 45.996  | 45.7383   | 15.9103    | 1         |
| cg26489369                                                      | HLA-DQA2                      | 2.61E-07          | 2.61E-07             | 0.259164           | -3.85856                     | T down vs N                            | 71.791  | 17.0773   | 3.80599    | 1         |
| cg26489750                                                      | NLRP2                         | 4.79E-05          | 4.79E-05             | 0.14669            | -6.81709                     | T down vs N                            | 30.314  | 34.507    | 18.2131    | 1         |
| cg26491833                                                      | CCND3;TAF8;CCND3              | 2.73E-05          | 2.73E-05             | 4.00701            | 4.00701                      | T up vs N                              | 33.598  | 18.0455   | 8.59373    | 1         |
| cg26492847                                                      | MAML2                         | 1.86E-06          | 1.86E-06             | 0.21626            | -4.62406                     | T down vs N                            | 52.908  | 21.9617   | 6.64152    | 1         |
| cg26495303                                                      | EMX2OS                        | 0.00156489        | 0.00156489           | 0.221833           | -4.50789                     | T down vs N                            | 14.458  | 21.238    | 23.503     | 1         |
| cg26495839                                                      | C19orf39                      | 0.00425426        | 0.00425426           | 0.317872           | -3.14592                     | T down vs N                            | 11.607  | 10.7651   | 12.9847    | 1         |
| cg26496795                                                      | ANKRD20B                      | 0.0001777         | 0.000177698          | 0.310101           | -3.22475                     | T down vs N                            | 23.512  | 12.8401   | 8.73758    | 1         |
| cg26498616                                                      | SLC6A19                       | 3.07E-05          | 3.07E-05             | 0.178018           | -5.61742                     | T down vs N                            | 32.898  | 27.8984   | 13.5683    | 1         |
| cg26500539                                                      | MAGEA8;MAGEA8;MAGEA8          | 8.14E-05          | 8.14E-05             | 0.286978           | -3.48459                     | T down vs N                            | 27.428  | 14.596    | 8.5144     | 1         |
| cg26502127                                                      | HCG9                          | 9.96E-05          | 9.96E-05             | 3.43687            | 3.43687                      | T up vs N                              | 26.376  | 14.2753   | 8.65951    | 1         |
| cg26502666                                                      | SPDYA;SPDYA                   | 0.000309          | 0.000309001          | 8.33197            | 8.33197                      | T up vs N                              | 20.965  | 42.0992   | 32.1293    | 1         |
| cg26503653                                                      | DOCK2                         | 1.69E-05          | 1.69E-05             | 5.37884            | 5.37884                      | T up vs N                              | 36.602  | 26.5129   | 11.5897    | 1         |
| cg26503877                                                      | ETS1;ETS1;ETS1                | 1.14E-05          | 1.14E-05             | 0.1146             | -8.726                       | T down vs N                            | 39.159  | 43.9543   | 17.9594    | 1         |
| cg26504110                                                      | LTBP4;LTBP4;LTBP4             | 0.0004072         | 0.000407195          | 10.2911            | 10.2911                      | T up vs N                              | 19.76   | 50.9036   | 41.2175    | 1         |
| cg26504835                                                      | PSORS1C3                      | 1.09E-06          | 1.09E-06             | 0.319191           | -3.13292                     | T down vs N                            | 57.613  | 12.2143   | 3.3921     | 1         |
| cg26504906                                                      | PRSS16                        | 4.82E-07          | 4.82E-07             | 0.17667            | -5.66028                     | T down vs N                            | 65.402  | 28.1447   | 6.88534    | 1         |
| cg26505691                                                      | IL21R;IL21R;IL21R             | 5.96E-05          | 5.96E-05             | 0.066374           | -15.0662                     | T down vs N                            | 29.099  | 68.9107   | 37.8903    | 1         |
| cg26509012                                                      | STX2;STX2                     | 1.26E-06          | 1.26E-06             | 0.295752           | -3.38121                     | T down vs N                            | 56.282  | 13.9002   | 3.95158    | 1         |
| cg26509305                                                      | RBKS                          | 0.00013317        | 0.000133169          | 0.267355           | -3.74034                     | T down vs N                            | 24.914  | 16.2992   | 10.4677    | 1         |
| cg26510404                                                      | HMGCR;HMGCR                   | 0.00587922        | 0.00587922           | 0.294636           | -3.39402                     | T down vs N                            | 10.08   | 13.9867   | 22.2005    | 1         |
| cg26510975                                                      | TNRC18                        | 0.00087592        | 0.00087592           | 0.279926           | -3.57237                     | T down vs N                            | 16.631  | 15.1836   | 14.6077    | 1         |
| cg26511108                                                      | COMMD3;BMI1                   | 0.00052704        | 0.000527042          | 0.306061           | -3.26732                     | T down vs N                            | 18.671  | 13.1293   | 11.2509    | 1         |
| PCDHA6;PCDHA2;PCDHA1;PCDHA9;PC<br>DHA7;PCDHA1;PCDHA6;PCDHA5;PCD |                               |                   |                      |                    |                              |                                        |         |           |            |           |
| cg26514430                                                      | HA11;PCDHA11;PCDHA10;PCDHA3;  | 0.00176237        | 0.00176237           | 3.2311             | 3.2311                       | T up vs N                              | 14.033  | 12.8833   | 14.6892    | 1         |
| cg26514793                                                      | CHST3                         | 0.00014236        | 0.000142358          | 0.282992           | -3.53367                     | T down vs N                            | 24.585  | 14.925    | 9.71322    | 1         |
| cg26514961                                                      | PLXNC1                        | 0.00029864        | 0.000298642          | 0.242053           | -4.13133                     | T down vs N                            | 21.117  | 18.8487   | 14.2815    | 1         |
| cg26517831                                                      | GNA12                         | 0.00079374        | 0.000793735          | 0.287141           | -3.48261                     | T down vs N                            | 17.016  | 14.5827   | 13.7119    | 1         |
| cg26518100                                                      | GREB1L                        | 5.27E-05          | 5.27E-05             | 0.235985           | -4.23756                     | T down vs N                            | 29.778  | 19.5294   | 10.4933    | 1         |
| cg26521259                                                      | HECW1                         | 0.00042649        | 0.000426487          | 0.262565           | -3.80858                     | T down vs N                            | 19.562  | 16.7491   | 13.6993    | 1         |
| cg26522684                                                      | DKFZp434L192                  | 0.0001426         | 0.000142599          | 0.299587           | -3.33793                     | T down vs N                            | 24.577  | 13.6078   | 8.85901    | 1         |
| cg26524353                                                      | HPCA                          | 5.78E-05          | 5.78E-05             | 0.262433           | -3.81049                     | T down vs N                            | 29.27   | 16.7616   | 9.16243    | 1         |
| cg26529044                                                      | C13orf30                      | 1.17E-06          | 1.17E-06             | 0.196279           | -5.09479                     | T down vs N                            | 56.97   | 24.8306   | 6.97366    | 1         |
| cg26529094                                                      | RASA3                         | 0.00261457        | 0.00261457           | 3.35788            | 3.35788                      | T up vs N                              | 12.669  | 13.7427   | 17.3564    | 1         |
| cg26529300                                                      | BSG                           | 0.00011676        | 0.000116763          | 0.163022           | -6.13414                     | T down vs N                            | 25.57   | 30.8158   | 19.2828    | 1         |
| cg26529687                                                      | NCKAP5;NCKAP5                 | 0.00160314        | 0.00160314           | 0.308805           | -3.23829                     | T down vs N                            | 14.371  | 12.9322   | 14.398     | 1         |
| cg26531231                                                      | CHRNA9                        | 0.00019058        | 0.000190582          | 0.19449            | -5.14165                     | T down vs N                            | 23.18   | 25.1106   | 17.3325    | 1         |
| cg26531371                                                      | LCE6A                         | 0.00077506        | 0.000775057          | 0.218289           | -4.58109                     | T down vs N                            | 17.11   | 21.6947   | 20.2873    | 1         |
| cg26532905                                                      | RNASEL                        | 0.0002236         | 0.0002236            | 0.29336            | -3.40878                     | T down vs N                            | 23.261  | 13.2576   | 8.54931    | 1         |
| cg26534677                                                      | CCDC25                        | 7.51E-05          | 7.51E-05             | 0.241509           | -4.14064                     | T down vs N                            | 27.856  | 18.9085   | 10.8606    | 1         |
| cg26536863                                                      | LOC154822                     | 0.0002728         | 0.000272802          | 0.308128           | -3.24541                     | T down vs N                            | 21.523  | 12.9805   | 9.64958    | 1         |
| cg26537478                                                      | MEIS1                         | 0.00078943        | 0.000789434          | 0.144365           | -6.9269                      | T down vs N                            | 17.038  | 35.084    | 32.9474    | 1         |
| PEG3;PEG3;PEG3;PEG3;ZIM2;ZIM2;PE                                |                               |                   |                      |                    |                              |                                        |         |           |            |           |
| cg26537561                                                      | G3;ZIM2                       | 0.00033807        | 0.000338071          | 3.05392            | 3.05392                      | T up vs N                              | 20.568  | 11.6741   | 9.08151    | 1         |
| cg26537568                                                      | PXMP4;PXMP4                   | 1.71E-05          | 1.71E-05             | 0.26245            | -3.81024                     | T down vs N                            | 36.503  | 16.76     | 7.34631    | 1         |
| cg26537639                                                      | CYBA                          | 8.14E-05          | 8.14E-05             | 3.88595            | 3.88595                      | T up vs N                              | 27.425  | 17.2566   | 10.0676    | 1         |
| cg26541218                                                      | PKD1L1                        | 6.88E-05          | 6.88E-05             | 0.173742           | -5.75565                     | T down vs N                            | 28.32   | 28.6898   | 16.209     | 1         |
| cg26541741                                                      | AGXT                          | 0.00282509        | 0.00282509           | 0.309436           | -3.23169                     | T down vs N                            | 12.409  | 12.8873   | 16.6165    | 1         |
| cg26543311                                                      | C12orf54                      | 8.48E-06          | 8.48E-06             | 0.106882           | -9.35611                     | T down vs N                            | 41.211  | 46.8292   | 18.1811    | 1         |
| cg26543908                                                      | SPNS1;SPNS1;SPNS1;SPNS1;SPNS1 | 1.33E-05          | 1.33E-05             | 0.20205            | -4.94927                     | T down vs N                            | 38.145  | 23.9546   | 10.0479    | 1         |
| cg26545162                                                      | ZACN                          | 3.64E-06          | 3.64E-06             | 0.237414           | -4.21206                     | T down vs N                            | 47.458  | 19.3665   | 6.52927    | 1         |
| cg26548497                                                      | STK36;RNF25                   | 6.97E-05          | 6.97E-05             | 0.282334           | -3.54191                     | T down vs N                            | 28.249  | 14.98     | 8.48456    | 1         |
| cg26553513                                                      | LRRC4C                        | 9.62E-05          | 9.62E-05             | 0.30368            | -3.29294                     | T down vs N                            | 26.555  | 13.3031   | 8.01538    | 1         |
| cg26555306                                                      | XYLT2                         | 0.00011955        | 0.000119553          | 0.3176             | -3.14861                     | T down vs N                            | 25.451  | 12.3214   | 7.74597    | 1         |

| Probeset ID | UCSC_REFGENE_NAME                                                | p-value<br>(Type) | p-value (T vs.<br>N) | Ratio (T<br>vs. N) | Fold-<br>Change (T<br>vs. N) | Fold-Change (T vs.<br>N) (Description) | F(Type) | SS (Type) | SS (Error) | F (Error) |
|-------------|------------------------------------------------------------------|-------------------|----------------------|--------------------|------------------------------|----------------------------------------|---------|-----------|------------|-----------|
| cg26555614  | PRR5L;PRR5L                                                      | 0.00221246        | 0.00221246           | 3.19855            | 3.19855                      | T up vs N                              | 13.238  | 12.6618   | 15.304     | 1         |
| cg26556719  | PCDHA7;PCDHA12;PCDHA6;PCDHA10;<br>PCDHA4;PCDHA11;PCDHA8;PCDHA1;P |                   |                      |                    |                              |                                        |         |           |            |           |
| cg26557270  | CDHA2;PCDHA6;PCDHA1;PCDHA9;                                      | 6.22E-05          | 6.22E-05             | 4.6738             | 4.6738                       | T up vs N                              | 28.867  | 22.2697   | 12.3433    | 1         |
| cg26557404  | FRK                                                              | 0.00019025        | 0.000190245          | 0.208253           | -4.80185                     | T down vs N                            | 23.189  | 23.0573   | 15.9095    | 1         |
| cg26557756  | MYO5B                                                            | 0.00337545        | 0.00337545           | 0.241678           | -4.13773                     | T down vs N                            | 11.822  | 18.8899   | 25.5649    | 1         |
| cg26558591  | GLI3                                                             | 0.00010203        | 0.000102026          | 0.285161           | -3.50679                     | T down vs N                            | 26.254  | 14.7449   | 8.98598    | 1         |
| cg26559804  | GSGL1;GSGL1L                                                     | 0.00137717        | 0.00137717           | 0.302579           | -3.30492                     | T down vs N                            | 14.923  | 13.3844   | 14.3508    | 1         |
| cg26561401  | ETS1;ETS1;ETS1                                                   | 4.88E-06          | 4.88E-06             | 0.163212           | -6.127                       | T down vs N                            | 45.221  | 30.7763   | 10.8892    | 1         |
| cg26561773  | SPG11;SPG11                                                      | 7.12E-06          | 7.12E-06             | 0.168281           | -5.94244                     | T down vs N                            | 42.453  | 29.7465   | 11.2112    | 1         |
| cg26562532  | VSIG4;VSIG4                                                      | 0.00012495        | 0.000124948          | 0.136261           | -7.33887                     | T down vs N                            | 25.23   | 37.2098   | 23.597     | 1         |
| cg26562691  | COX6B2                                                           | 8.16E-06          | 8.16E-06             | 0.186194           | -5.37075                     | T down vs N                            | 41.482  | 26.4655   | 10.2081    | 1         |
| cg26567423  | PRKCB;PRKCB                                                      | 5.09E-05          | 5.09E-05             | 0.214091           | -4.67092                     | T down vs N                            | 29.977  | 22.2519   | 11.8768    | 1         |
| cg26570233  | FLJ12825                                                         | 0.00458822        | 0.00458822           | 5.1728             | 5.1728                       | T up vs N                              | 10.843  | 25.2962   | 37.3285    | 1         |
| cg26570714  | TAF1D;C11orf54                                                   | 0.00049089        | 0.000490893          | 0.292214           | -3.42215                     | T down vs N                            | 18.968  | 14.1763   | 11.9583    | 1         |
| cg26571002  | OR2T10                                                           | 0.00039667        | 0.000396672          | 0.25425            | -3.93314                     | T down vs N                            | 19.873  | 17.5649   | 14.1421    | 1         |
| cg26571870  | SIGLEC15                                                         | 6.45E-06          | 6.45E-06             | 0.282955           | -3.53413                     | T down vs N                            | 43.16   | 14.928    | 5.53398    | 1         |
| cg26572165  | GINS2                                                            | 0.00047994        | 0.00047994           | 0.304469           | -3.28441                     | T down vs N                            | 19.062  | 13.2453   | 11.1175    | 1         |
| cg26573382  | CD244;CD244;CD244                                                | 3.27E-05          | 3.27E-05             | 0.230588           | -4.33674                     | T down vs N                            | 32.509  | 20.1602   | 9.92236    | 1         |
| cg26574247  | NRCAM;NRCAM                                                      | 0.00185703        | 0.00185703           | 0.262973           | -3.80268                     | T down vs N                            | 13.848  | 16.7102   | 19.3072    | 1         |
| cg26574395  | ENPP7                                                            | 4.16E-05          | 4.16E-05             | 0.22429            | -4.45851                     | T down vs N                            | 31.114  | 20.9284   | 10.7623    | 1         |
| cg26576172  | SULT2A1                                                          | 2.54E-05          | 2.54E-05             | 0.129658           | -7.71259                     | T down vs N                            | 34.044  | 39.0874   | 18.3701    | 1         |
| cg26577252  | ADAMTS3                                                          | 6.17E-05          | 6.17E-05             | 0.26814            | -3.7294                      | T down vs N                            | 30.189  | 15.2724   | 7.58842    | 1         |
| cg26579145  | IGF1R                                                            | 0.0012856         | 0.0012856            | 0.257293           | -3.88661                     | T down vs N                            | 15.176  | 17.261    | 18.1984    | 1         |
| cg26582789  | HS3ST2                                                           | 3.70E-05          | 3.70E-05             | 0.174912           | -5.71715                     | T down vs N                            | 31.796  | 28.4702   | 14.3263    | 1         |
| cg26583474  | MAP3K15                                                          | 2.76E-07          | 2.76E-07             | 0.33198            | -3.01223                     | T down vs N                            | 71.213  | 11.3884   | 2.55871    | 1         |
| cg26583598  | RPS7                                                             | 2.39E-06          | 2.39E-06             | 0.209614           | -4.77067                     | T down vs N                            | 50.832  | 22.8662   | 7.19747    | 1         |
| cg26585981  | ZSWIM6                                                           | 0.00056131        | 0.00056131           | 0.290653           | -3.44053                     | T down vs N                            | 18.411  | 14.3      | 12.4273    | 1         |
| cg26586508  | OR4S1                                                            | 0.00077657        | 0.000776572          | 0.297773           | -3.35826                     | T down vs N                            | 17.102  | 13.7453   | 12.8593    | 1         |
| cg26587228  | MICALL2                                                          | 0.00466081        | 0.00466081           | 0.32598            | -3.06767                     | T down vs N                            | 10.794  | 11.7682   | 17.4447    | 1         |
| cg26590664  | USP29                                                            | 5.68E-05          | 5.68E-05             | 0.173516           | -5.76316                     | T down vs N                            | 29.366  | 28.7326   | 15.6548    | 1         |
| cg26600753  | ZNF833                                                           | 0.00660572        | 0.00660572           | 3.47238            | 3.47238                      | T up vs N                              | 9.7307  | 14.514    | 23.8652    | 1         |
| cg26600826  | TRIM7;TRIM7;TRIM7;TRIM7;TRIM7                                    | 2.31E-06          | 2.31E-06             | 4.97599            | 4.97599                      | T up vs N                              | 51.114  | 24.1162   | 7.54902    | 1         |
| cg26601073  | OR5M1;OR8U8                                                      | 6.20E-05          | 6.20E-05             | 0.232211           | -4.30644                     | T down vs N                            | 28.887  | 19.9679   | 11.06      | 1         |
| cg26605809  | TLCD2                                                            | 5.61E-07          | 5.61E-07             | 3.64243            | 3.64243                      | T up vs N                              | 63.88   | 15.6503   | 3.91996    | 1         |
| cg26612165  | TPO;TPO;TPO;TPO                                                  | 5.73E-05          | 5.73E-05             | 0.314703           | -3.1776                      | T down vs N                            | 29.317  | 12.5191   | 6.83248    | 1         |
| cg26614624  | IER5;IER5                                                        | 0.0001923         | 0.000192304          | 0.297263           | -3.36403                     | T down vs N                            | 23.138  | 13.7842   | 9.53201    | 1         |
| cg26615188  | CMTM1;CMTM1;CMTM1;CMTM1;CM                                       |                   |                      |                    |                              |                                        |         |           |            |           |
| cg26616640  | TM1;CMTM1;CMTM1;CMTM1                                            | 5.21E-07          | 5.21E-07             | 0.219437           | -4.55712                     | T down vs N                            | 64.61   | 21.5454   | 5.33549    | 1         |
| cg26616780  | C20orf186                                                        | 0.00023086        | 0.000230855          | 0.279891           | -3.57281                     | T down vs N                            | 22.285  | 15.1866   | 10.9035    | 1         |
| cg26619193  | SLC26A10                                                         | 1.36E-05          | 1.36E-05             | 3.21935            | 3.21935                      | T up vs N                              | 38.014  | 12.8033   | 5.38897    | 1         |
| cg26621014  | SIRPB1;SIRPB1                                                    | 0.00023463        | 0.000234626          | 0.217519           | -4.59731                     | T down vs N                            | 22.21   | 21.7956   | 15.7013    | 1         |
| cg26622174  | RYR1;RYR1                                                        | 0.00024634        | 0.000246336          | 0.301834           | -3.31308                     | T down vs N                            | 21.987  | 13.4396   | 9.78015    | 1         |
| cg26622699  | CPXCR1                                                           | 0.00125617        | 0.00125617           | 0.283343           | -3.52929                     | T down vs N                            | 15.262  | 14.8956   | 15.6163    | 1         |
| cg26623837  | PRSSL1                                                           | 0.00017847        | 0.000178468          | 0.299592           | -3.33788                     | T down vs N                            | 23.492  | 13.6075   | 9.26788    | 1         |
| cg26626663  | HOBX3                                                            | 2.89E-06          | 2.89E-06             | 5.63749            | 5.63749                      | T up vs N                              | 49.274  | 28.0138   | 9.09646    | 1         |
| cg26627956  | CORO6                                                            | 0.00060004        | 0.000600035          | 3.51639            | 3.51639                      | T up vs N                              | 18.138  | 14.8093   | 13.0639    | 1         |
| cg26628410  | COL14A1                                                          | 0.00402107        | 0.00402107           | 5.23496            | 5.23496                      | T up vs N                              | 11.259  | 25.6653   | 36.4731    | 1         |
| cg26628847  | CFLAR;CFLAR;CFLAR                                                | 0.00012208        | 0.00012208           | 3.64831            | 3.64831                      | T up vs N                              | 25.346  | 15.6894   | 9.90407    | 1         |
| cg26630735  | CCDC6                                                            | 0.00073101        | 0.000731011          | 0.284365           | -3.51661                     | T down vs N                            | 17.342  | 14.8107   | 13.6646    | 1         |
| cg26630791  | PIP                                                              | 3.24E-06          | 3.24E-06             | 0.205592           | -4.864                       | T down vs N                            | 48.366  | 23.4368   | 7.75321    | 1         |
| cg26631437  | CCDC68                                                           | 6.38E-06          | 6.38E-06             | 10.4823            | 10.4823                      | T up vs N                              | 43.244  | 51.7107   | 19.1327    | 1         |
| cg26632429  | HAPLN1                                                           | 0.00261601        | 0.00261601           | 4.03027            | 4.03027                      | T up vs N                              | 12.667  | 18.1963   | 22.9845    | 1         |
| cg26633219  | TEX15                                                            | 0.00135452        | 0.00135452           | 0.314631           | -3.17833                     | T down vs N                            | 14.983  | 12.524    | 13.3739    | 1         |
| cg266339146 | HOXB1                                                            | 0.00013679        | 0.000136791          | 9.40459            | 9.40459                      | T up vs N                              | 24.781  | 47.0459   | 30.3753    | 1         |
| cg26634376  | CFTR                                                             | 5.69E-06          | 5.69E-06             | 23.6734            | 23.6734                      | T up vs N                              | 44.076  | 93.7846   | 34.0447    | 1         |
| cg26643476  | CD9                                                              | 0.00190413        | 0.00190413           | 4.19421            | 4.19421                      | T up vs N                              | 13.76   | 19.2522   | 22.3867    | 1         |
| cg26644395  | GPR81                                                            | 0.00221705        | 0.00221705           | 0.254405           | -3.93073                     | T down vs N                            | 13.231  | 17.5492   | 21.2227    | 1         |
| cg26644674  | UCN3;UCN3                                                        | 2.11E-05          | 2.11E-05             | 0.263931           | -3.78886                     | T down vs N                            | 35.174  | 16.6193   | 7.55992    | 1         |
| cg26645432  | PFKP                                                             | 0.00015425        | 0.000154245          | 0.247241           | -4.04464                     | T down vs N                            | 24.194  | 18.2893   | 12.0953    | 1         |
| cg26645879  | HLA-DPB1                                                         | 0.00081289        | 0.000812892          | 4.34383            | 4.34383                      | T up vs N                              | 16.922  | 20.2051   | 19.1037    | 1         |
| cg26646411  | CST9L                                                            | 0.00038433        | 0.000384331          | 0.22183            | -4.50796                     | T down vs N                            | 20.009  | 21.2384   | 16.9832    | 1         |
| cg26646567  | GNB1L;C22orf29                                                   | 0.00121052        | 0.00121052           | 0.243541           | -4.10608                     | T down vs N                            | 15.399  | 18.6861   | 19.4151    | 1         |
| cg26647197  | ANKRD26P1                                                        | 0.00097901        | 0.000979013          | 0.312757           | -3.19737                     | T down vs N                            | 16.201  | 12.6538   | 12.4965    | 1         |
| cg26647771  | PCDHGA4;PCDHGA9;PCDHGA1;PCDHG                                    |                   |                      |                    |                              |                                        |         |           |            |           |
| cg26650827  | A11;PCDHGB1;PCDHGB6;PCDHGA11;P                                   |                   |                      |                    |                              |                                        |         |           |            |           |
| cg26655361  | CDHGB3;PCDHGB7;PCDHGA6;PCDHG                                     | 2.24E-05          | 2.24E-05             | 4.36334            | 4.36334                      | T up vs N                              | 34.804  | 20.3286   | 9.34537    | 1         |
| cg26655361  | NPR3                                                             | 0.00020388        | 0.00020388           | 0.191154           | -5.23138                     | T down vs N                            | 22.863  | 25.6441   | 17.9465    | 1         |
| cg26655361  | HLA-DPB2                                                         | 0.00031609        | 0.000316085          | 0.199791           | -5.00522                     | T down vs N                            | 20.864  | 24.2926   | 18.629     | 1         |
| cg26655361  | ZNF323;ZKSCAN3;ZNF323                                            | 0.00073354        | 0.00073354           | 0.314859           | -3.17603                     | T down vs N                            | 17.328  | 12.5083   | 11.5496    | 1         |

| Probeset ID | UCSC_REFGENE_NAME               | p-value<br>(Type) | p-value (T vs.<br>N) | Ratio (T<br>vs. N) | Fold-<br>Change (T<br>vs. N) | Fold-Change (T vs.<br>N) (Description) | F(Type) | SS (Type) | SS (Error) | F (Error) |
|-------------|---------------------------------|-------------------|----------------------|--------------------|------------------------------|----------------------------------------|---------|-----------|------------|-----------|
| cg26658272  | SLC6A18                         | 1.18E-06          | 1.18E-06             | 0.189692           | -5.2717                      | T down vs N                            | 56.875  | 25.8826   | 7.28121    | 1         |
| cg26659805  | AMH                             | 0.00205155        | 0.00205155           | 3.05108            | 3.05108                      | T up vs N                              | 13.841  | 10.969    | 11.8872    | 1         |
| cg26663490  | GPRC5C;GPRC5C                   | 0.00109444        | 0.00109444           | 0.297222           | -3.36449                     | T down vs N                            | 15.777  | 13.7873   | 13.9818    | 1         |
| cg26667091  | EHBP1L1                         | 0.00076138        | 0.000761384          | 3.60537            | 3.60537                      | T up vs N                              | 17.18   | 15.4037   | 14.3454    | 1         |
| cg26668919  | PPARD;PPARD                     | 0.00162439        | 0.00162439           | 0.14077            | -7.10377                     | T down vs N                            | 17.199  | 22.1563   | 14.171     | 1         |
| cg26669393  | CYP2B6                          | 2.37E-05          | 2.37E-05             | 0.242766           | -4.1192                      | T down vs N                            | 34.451  | 18.7706   | 8.7177     | 1         |
| cg26673195  | G6PC                            | 0.00020763        | 0.000207633          | 0.329005           | -3.03947                     | T down vs N                            | 22.777  | 11.5751   | 8.13095    | 1         |
| cg26673722  | TMPRSS11A;TMPRSS11A             | 0.00025935        | 0.000259353          | 0.172099           | -5.8106                      | T down vs N                            | 21.752  | 29.0022   | 21.333     | 1         |
| cg26673975  | CDH5                            | 0.00168911        | 0.00168911           | 0.233968           | -4.27409                     | T down vs N                            | 14.184  | 19.7622   | 22.2924    | 1         |
| cg26675395  | PRSS36                          | 0.00464968        | 0.00464968           | 3.60799            | 3.60799                      | T up vs N                              | 10.801  | 15.4212   | 22.844     | 1         |
| cg26675906  | TAOK1                           | 2.14E-05          | 2.14E-05             | 0.230884           | -4.33117                     | T down vs N                            | 35.09   | 20.1249   | 9.1763     | 1         |
| cg26676034  | RTKN;RTKN;RTKN;RTKN             | 0.00035906        | 0.000359057          | 8.04031            | 8.04031                      | T up vs N                              | 21.837  | 36.1742   | 23.1915    | 1         |
| cg26676468  | MCC;MCC                         | 0.00040788        | 0.000407877          | 0.145152           | -6.88935                     | T down vs N                            | 19.753  | 34.8872   | 28.259     | 1         |
| cg26677288  | KIF26B                          | 2.55E-05          | 2.55E-05             | 0.085576           | -11.6855                     | T down vs N                            | 34.012  | 56.6042   | 26.6282    | 1         |
| cg26678920  | PRKCSBP                         | 0.00018134        | 0.000181342          | 5.36935            | 5.36935                      | T up vs N                              | 23.416  | 26.4573   | 18.0783    | 1         |
| cg26679367  | PLEKHN1;PLEKHN1                 | 7.41E-06          | 7.41E-06             | 0.289561           | -3.45351                     | T down vs N                            | 42.169  | 14.3872   | 5.45886    | 1         |
| cg26680127  | MYLK3                           | 4.33E-07          | 4.33E-07             | 0.289157           | -3.45833                     | T down vs N                            | 66.47   | 14.4197   | 3.47095    | 1         |
| cg26680644  | C1orf130                        | 0.00017899        | 0.000178989          | 0.175473           | -5.6989                      | T down vs N                            | 23.478  | 28.3659   | 19.3311    | 1         |
| cg26681770  | PMEPA1;PMEPA1;PMEPA1;PMEPA1     | 0.00040532        | 0.00040532           | 0.080674           | -12.3956                     | T down vs N                            | 19.78   | 59.3536   | 48.0115    | 1         |
| cg26683023  | ZNF678;ZNF678                   | 2.36E-06          | 2.36E-06             | 0.269006           | -3.71739                     | T down vs N                            | 50.92   | 16.1475   | 5.07389    | 1         |
| cg26683025  | OVOL1                           | 0.00033276        | 0.000332761          | 0.20506            | -4.87663                     | T down vs N                            | 20.637  | 23.5137   | 18.2301    | 1         |
| cg26683259  | LHFPL2                          | 5.11E-05          | 5.11E-05             | 0.310803           | -3.21747                     | T down vs N                            | 29.953  | 12.7906   | 6.8323     | 1         |
| cg26687072  | H0XB1                           | 5.89E-06          | 5.89E-06             | 10.8015            | 10.8015                      | T up vs N                              | 43.824  | 53.0396   | 19.3647    | 1         |
| cg26687173  | WDR88                           | 5.10E-05          | 5.10E-05             | 3.16207            | 3.16207                      | T up vs N                              | 29.961  | 12.4132   | 6.62894    | 1         |
| cg26687497  | SLC30A8;SLC30A8                 | 0.0025442         | 0.0025442            | 0.324715           | -3.07962                     | T down vs N                            | 12.761  | 11.85     | 14.858     | 1         |
| cg26692003  | IQSEC1                          | 0.00085757        | 0.000857574          | 0.247065           | -4.04752                     | T down vs N                            | 16.713  | 18.308    | 17.5268    | 1         |
| cg26697065  | SEPHS2                          | 4.78E-05          | 4.78E-05             | 0.120809           | -8.27752                     | T down vs N                            | 30.322  | 41.8392   | 22.0776    | 1         |
| cg26698693  | CIRH1A                          | 5.69E-06          | 5.69E-06             | 0.265862           | -3.76135                     | T down vs N                            | 44.073  | 16.438    | 5.96749    | 1         |
| cg26700215  | TRIM55;TRIM55;TRIM55;TRIM55     | 1.10E-06          | 1.10E-06             | 0.142061           | -7.03923                     | T down vs N                            | 57.518  | 35.6696   | 9.92233    | 1         |
| cg26700407  | VWA3A                           | 3.09E-06          | 3.09E-06             | 0.297295           | -3.36366                     | T down vs N                            | 48.76   | 13.7817   | 4.52231    | 1         |
| cg26700716  | FRZB                            | 0.00014693        | 0.000146926          | 5.54328            | 5.54328                      | T up vs N                              | 24.43   | 27.4705   | 17.9911    | 1         |
| cg26701390  | OSR1                            | 2.67E-05          | 2.67E-05             | 4.08866            | 4.08866                      | T up vs N                              | 33.738  | 18.5738   | 8.80845    | 1         |
| cg26703873  | UNG                             | 0.00045711        | 0.000457114          | 0.275909           | -3.62438                     | T down vs N                            | 19.268  | 15.5303   | 12.8965    | 1         |
| cg26703880  | ODZ4                            | 2.64E-05          | 2.64E-05             | 0.30664            | -3.26115                     | T down vs N                            | 33.803  | 13.0875   | 6.19462    | 1         |
| cg26705574  | NFATC4;NFATC4;NFATC4            | 0.00111042        | 0.00111042           | 0.298934           | -3.34522                     | T down vs N                            | 15.723  | 13.6571   | 13.898     | 1         |
| cg26706003  | AVPR1A;AVPR1A                   | 0.0001648         | 0.000164804          | 0.307991           | -3.24685                     | T down vs N                            | 23.873  | 12.9903   | 8.70615    | 1         |
| cg26709285  | KCNB1;KCNB1                     | 1.64E-05          | 1.64E-05             | 6.57737            | 6.57737                      | T up vs N                              | 36.769  | 33.2319   | 14.4609    | 1         |
| cg26709300  | YPEL3;YPEL3                     | 0.00115395        | 0.00115395           | 3.19829            | 3.19829                      | T up vs N                              | 15.578  | 12.66     | 13.0028    | 1         |
| cg26709356  | SHISA7                          | 3.87E-06          | 3.87E-06             | 50.1323            | 50.1323                      | T up vs N                              | 46.98   | 143.533   | 48.8829    | 1         |
| cg26712821  | DVWA                            | 0.00013183        | 0.000131828          | 0.25505            | -3.92081                     | T down vs N                            | 24.964  | 17.4845   | 11.2063    | 1         |
| cg26721450  | PFDN6;WDR46;WDR46               | 3.00E-05          | 3.00E-05             | 0.231468           | -4.32025                     | T down vs N                            | 33.031  | 20.0557   | 9.71474    | 1         |
| cg26724070  | SNX20;SNX20;SNX20               | 0.00019326        | 0.000193258          | 3.00508            | 3.00508                      | T up vs N                              | 23.114  | 11.3393   | 7.84924    | 1         |
| cg26724798  | HTR3A;HTR3A                     | 2.53E-07          | 2.53E-07             | 0.260706           | -3.83573                     | T down vs N                            | 72.126  | 16.9275   | 3.7551     | 1         |
| cg26725397  | HS3ST4                          | 1.25E-05          | 1.25E-05             | 0.241641           | -4.13837                     | T down vs N                            | 38.581  | 18.894    | 7.83554    | 1         |
| cg26725862  | RBM20                           | 0.00183625        | 0.00183625           | 0.316957           | -3.15501                     | T down vs N                            | 13.888  | 12.365    | 14.2458    | 1         |
| cg26727538  | CEACAM18                        | 0.00614446        | 0.00614446           | 0.296734           | -3.37002                     | T down vs N                            | 9.9472  | 13.8247   | 2.237      | 1         |
| cg26737330  | C4orf35                         | 0.00027113        | 0.000271131          | 0.320511           | -3.12001                     | T down vs N                            | 21.551  | 12.1261   | 9.00284    | 1         |
| cg26744079  | C10orf41;C10orf41               | 0.00012427        | 0.000124266          | 5.48589            | 5.48589                      | T up vs N                              | 25.258  | 27.1376   | 17.191     | 1         |
| cg26746037  | ZFR2                            | 0.00052285        | 0.000522847          | 0.084837           | -11.7874                     | T down vs N                            | 18.705  | 57.0045   | 48.762     | 1         |
| cg26746482  | CLDN6                           | 0.00087988        | 0.000879876          | 0.324679           | -3.07997                     | T down vs N                            | 16.613  | 11.8523   | 11.4148    | 1         |
| cg26746878  | IKZF1                           | 6.15E-05          | 6.15E-05             | 0.248549           | -4.02335                     | T down vs N                            | 28.931  | 18.1515   | 10.0385    | 1         |
| cg26747317  | NEU1                            | 0.00674827        | 0.00674827           | 0.323349           | -3.09263                     | T down vs N                            | 9.6673  | 11.939    | 19.7599    | 1         |
| cg26749414  | HIF3A;HIF3A;HIF3A               | 4.57E-05          | 4.57E-05             | 6.76579            | 6.76579                      | T up vs N                              | 30.579  | 34.2359   | 17.9136    | 1         |
| cg26749833  | MIR489;CALCR;MIR653;CALCR;CALCR | 0.00187505        | 0.00187505           | 0.310629           | -3.21927                     | T down vs N                            | 13.814  | 12.8028   | 14.829     | 1         |
| cg26750188  | JMJD8;WDR24                     | 0.00053586        | 0.000535856          | 0.217441           | -4.59894                     | T down vs N                            | 18.603  | 21.8058   | 18.755     | 1         |
| cg26751645  | RBPJL                           | 0.0002626         | 0.000262596          | 5.23048            | 5.23048                      | T up vs N                              | 21.696  | 25.6388   | 18.908     | 1         |
| cg26751828  | RIN3                            | 2.78E-06          | 2.78E-06             | 4.31582            | 4.31582                      | T up vs N                              | 49.61   | 20.0275   | 6.4592     | 1         |
| cg26753302  | SERPINB5                        | 0.00035491        | 0.000354907          | 0.324464           | -3.082                       | T down vs N                            | 20.355  | 11.8663   | 9.32755    | 1         |
| cg26753608  | PVT1                            | 3.71E-07          | 3.71E-07             | 0.194289           | -5.14698                     | T down vs N                            | 68.066  | 25.1424   | 5.91016    | 1         |
| cg26754184  | OR3A2                           | 3.42E-06          | 3.42E-06             | 0.327852           | -3.05016                     | T down vs N                            | 47.946  | 11.6483   | 3.88715    | 1         |
| cg26754262  | MIR2052                         | 0.00013945        | 0.000139454          | 0.267457           | -3.73891                     | T down vs N                            | 24.686  | 16.2898   | 10.558     | 1         |
| cg26754510  | C6orf57                         | 5.80E-05          | 5.80E-05             | 0.326534           | -3.06246                     | T down vs N                            | 29.247  | 11.7325   | 6.41852    | 1         |
| cg26755097  | FLOT1;IER3                      | 0.00031844        | 0.000318438          | 12.9528            | 12.9528                      | T up vs N                              | 20.832  | 61.4451   | 47.194     | 1         |
| cg26757097  | RGL2;RGL2                       | 2.55E-05          | 2.55E-05             | 0.251255           | -3.98001                     | T down vs N                            | 34.018  | 17.8702   | 8.40507    | 1         |
| cg26758486  | SDK2                            | 0.00322543        | 0.00322543           | 0.309791           | -3.22798                     | T down vs N                            | 11.971  | 12.8621   | 17.1911    | 1         |
| cg26758986  | P4HA3                           | 0.00543313        | 0.00543313           | 5.84815            | 5.84815                      | T up vs N                              | 10.32   | 29.2149   | 45.2939    | 1         |
| cg26759925  | IL1F9                           | 0.00044648        | 0.000446475          | 0.294324           | -3.39761                     | T down vs N                            | 19.367  | 14.0109   | 11.5749    | 1         |
| cg26762347  | PRDM16;PRDM16                   | 7.91E-06          | 7.91E-06             | 8.26463            | 8.26463                      | T up vs N                              | 41.703  | 41.7776   | 16.0285    | 1         |
| cg26762873  | ORS2E8                          | 0.00135043        | 0.00135043           | 0.248512           | -4.02396                     | T down vs N                            | 14.994  | 18.1554   | 19.373     | 1         |
| cg26763380  | EIF3E                           | 0.00581289        | 0.00581289           | 0.309448           | -3.23156                     | T down vs N                            | 10.115  | 12.8864   | 20.3847    | 1         |

| Probeset ID                    | UCSC_REFGENE_NAME            | p-value<br>(Type) | p-value (T vs.<br>N) | Ratio (T<br>vs. N) | Fold-<br>Change (T<br>vs. N) | Fold-Change (T vs.<br>N) (Description) | F(Type) | SS (Type) | SS (Error) | F (Error) |
|--------------------------------|------------------------------|-------------------|----------------------|--------------------|------------------------------|----------------------------------------|---------|-----------|------------|-----------|
| cg26764846                     | GJB6;GJB6;GJB6;GJB6          | 5.90E-05          | 5.90E-05             | 0.273945           | -3.65036                     | T down vs N                            | 29.157  | 15.7031   | 8.61717    | 1         |
| cg26774043                     | HCCA2                        | 0.00107845        | 0.00107845           | 0.27987            | -3.57309                     | T down vs N                            | 15.833  | 15.1884   | 15.3486    | 1         |
| cg26777836                     | LRRC3B                       | 0.00017845        | 0.000178453          | 12.3552            | 12.3552                      | T up vs N                              | 23.492  | 59.1996   | 40.3195    | 1         |
| cg26782013                     | PCBD1                        | 0.0015675         | 0.0015675            | 0.278481           | -3.5909                      | T down vs N                            | 14.838  | 14.4068   | 14.5642    | 1         |
| cg26782108                     | SLC13A5;SLC13A5              | 2.80E-06          | 2.80E-06             | 8.16066            | 8.16066                      | T up vs N                              | 49.532  | 41.2782   | 13.3337    | 1         |
| cg26784412                     | HLA-DPB2                     | 9.17E-06          | 9.17E-06             | 0.191164           | -5.23112                     | T down vs N                            | 40.67   | 25.6425   | 10.0881    | 1         |
| cg26784822                     | RND3                         | 0.00466664        | 0.00466664           | 0.307793           | -3.24894                     | T down vs N                            | 10.79   | 13.0045   | 19.2843    | 1         |
| cg26785431                     | ZIM3                         | 2.84E-05          | 2.84E-05             | 0.125747           | -7.95249                     | T down vs N                            | 33.362  | 40.2683   | 19.3125    | 1         |
| cg26785949                     | CTU1                         | 0.00286543        | 0.00286543           | 0.30477            | -3.28116                     | T down vs N                            | 12.362  | 13.2232   | 17.1149    | 1         |
| cg26786037                     | MYO1H                        | 3.57E-05          | 3.57E-05             | 0.231078           | -4.32754                     | T down vs N                            | 32      | 20.1019   | 10.051     | 1         |
| cg26788737                     | C1orf55                      | 1.16E-06          | 1.16E-06             | 0.111251           | -8.9887                      | T down vs N                            | 57.079  | 45.1662   | 12.6608    | 1         |
| SNORD115-9;SNORD115-           |                              |                   |                      |                    |                              |                                        |         |           |            |           |
| cg26789068                     | 10;SNORD115-12;SNORD115-5    | 0.00017513        | 0.00017513           | 0.272032           | -3.67604                     | T down vs N                            | 23.582  | 15.8735   | 10.77      | 1         |
| cg26789859                     | CENPN                        | 0.00022062        | 0.000220617          | 0.294442           | -3.39625                     | T down vs N                            | 22.495  | 14.0017   | 9.95908    | 1         |
| cg26791197                     | OR2M5                        | 0.00457449        | 0.00457449           | 0.323107           | -3.09495                     | T down vs N                            | 10.852  | 11.9548   | 17.6259    | 1         |
| cg26791464                     | COL9A2                       | 1.22E-05          | 1.97E-05             | 3.36606            | 3.36606                      | T up vs N                              | 38.699  | 13.798    | 5.70476    | 1         |
| cg26794028                     | FMO3;FMO3;FMO3;FMO3          | 2.62E-05          | 2.62E-05             | 0.274091           | -3.64842                     | T down vs N                            | 33.856  | 15.6902   | 7.41506    | 1         |
| cg26795312                     | C8orf77                      | 1.86E-05          | 1.86E-05             | 0.286758           | -3.48727                     | T down vs N                            | 35.978  | 14.614    | 6.49904    | 1         |
| cg26796873                     | TMEM126A                     | 4.13E-05          | 4.13E-05             | 0.330658           | -3.02427                     | T down vs N                            | 31.152  | 11.4709   | 5.89167    | 1         |
| cg26800915                     | OR51B4                       | 0.0001756         | 0.000175596          | 0.185659           | -5.38621                     | T down vs N                            | 23.569  | 26.5561   | 18.0276    | 1         |
| cg26801943                     | SEMA4F                       | 0.00055183        | 0.00055183           | 0.319509           | -3.12981                     | T down vs N                            | 18.481  | 12.193    | 10.556     | 1         |
| cg26802026                     | FBN2                         | 0.00155941        | 0.00155941           | 0.328824           | -3.04114                     | T down vs N                            | 14.471  | 11.5865   | 12.811     | 1         |
| CACNB2;CACNB2;CACNB2;CACNB2;CA |                              |                   |                      |                    |                              |                                        |         |           |            |           |
| cg26803268                     | CNB2;CACNB2;CACNB2           | 0.00050788        | 0.000507881          | 0.299675           | -3.33695                     | T down vs N                            | 18.826  | 13.6012   | 11.5598    | 1         |
| cg26803289                     | NPL                          | 5.42E-05          | 5.42E-05             | 0.294275           | -3.39819                     | T down vs N                            | 29.623  | 14.0148   | 7.56959    | 1         |
| cg26803301                     | TKTL1;TEX28;TKTL1            | 1.95E-06          | 1.95E-06             | 0.117694           | -8.49664                     | T down vs N                            | 52.524  | 42.8801   | 13.0621    | 1         |
| cg26804299                     | EBF2                         | 0.00028884        | 0.000288836          | 0.291075           | -3.43554                     | T down vs N                            | 21.266  | 14.2664   | 10.7336    | 1         |
| cg26805779                     | HLA-DMA                      | 1.97E-05          | 1.97E-05             | 0.327977           | -3.049                       | T down vs N                            | 35.605  | 11.6403   | 5.23087    | 1         |
| cg26806835                     | CLDN22;CLDN22;WWC2           | 0.0004918         | 0.000491802          | 0.320393           | -3.12117                     | T down vs N                            | 18.96   | 12.134    | 10.2397    | 1         |
| cg26807107                     | AQP8                         | 0.00546025        | 0.00546025           | 0.274861           | -3.63821                     | T down vs N                            | 10.305  | 15.6223   | 24.256     | 1         |
| cg26808436                     | NR2E1                        | 2.30E-06          | 2.30E-06             | 0.168977           | -5.91796                     | T down vs N                            | 51.162  | 29.6088   | 9.25972    | 1         |
| cg26808478                     | DNAJC11                      | 3.11E-05          | 3.11E-05             | 0.244571           | -4.08879                     | T down vs N                            | 32.823  | 18.5746   | 9.05445    | 1         |
| cg26808583                     | S100A12                      | 8.38E-06          | 8.38E-06             | 0.172052           | -5.8122                      | T down vs N                            | 41.293  | 29.0113   | 11.2412    | 1         |
| cg26808747                     | ADAM12;ADAM12                | 0.00060245        | 0.000602448          | 6.55362            | 6.55362                      | T up vs N                              | 18.121  | 33.1044   | 29.2293    | 1         |
| cg26811568                     | OR4C12                       | 0.00031459        | 0.000314589          | 0.306004           | -3.26793                     | T down vs N                            | 20.885  | 13.1335   | 10.0614    | 1         |
| cg26812615                     | MAP1LC3B2                    | 5.91E-05          | 5.91E-05             | 0.276215           | -3.62037                     | T down vs N                            | 29.148  | 15.5036   | 8.51026    | 1         |
| cg26813907                     | C19orf21                     | 0.0003664         | 0.000366402          | 0.30324            | -3.29771                     | T down vs N                            | 20.216  | 13.3355   | 10.5545    | 1         |
| cg26814075                     | LEP                          | 2.75E-05          | 2.75E-05             | 9.41617            | 9.41617                      | T up vs N                              | 33.551  | 47.0976   | 22.4603    | 1         |
| cg26815032                     | COL21A1                      | 5.03E-05          | 5.03E-05             | 0.250262           | -3.99581                     | T down vs N                            | 30.037  | 17.9728   | 9.57377    | 1         |
| cg26817371                     | PLVAP                        | 4.75E-07          | 4.75E-07             | 0.186728           | -5.35537                     | T down vs N                            | 65.546  | 26.3753   | 6.43827    | 1         |
| cg26817972                     | TMCO1                        | 0.00231571        | 0.00231571           | 0.332454           | -3.00794                     | T down vs N                            | 13.081  | 11.3589   | 13.8936    | 1         |
| cg26818645                     | MRPL35;MRPL35                | 1.15E-06          | 1.15E-06             | 0.281606           | -3.55106                     | T down vs N                            | 57.156  | 15.0412   | 4.21061    | 1         |
| cg26818786                     | CARD6                        | 0.00046472        | 0.000464717          | 0.272765           | -3.66615                     | T down vs N                            | 19.198  | 15.808    | 13.1747    | 1         |
| cg26819695                     | ASAM                         | 0.00021221        | 0.000212213          | 8.89201            | 8.89201                      | T up vs N                              | 22.675  | 44.7224   | 31.5566    | 1         |
| cg26819718                     | C10orf11                     | 5.88E-06          | 5.88E-06             | 9.81031            | 9.81031                      | T up vs N                              | 43.835  | 48.8358   | 17.8252    | 1         |
| cg26820168                     | FAM83A;FAM83A                | 0.00136305        | 0.00136305           | 3.07634            | 3.07634                      | T up vs N                              | 14.96   | 11.8275   | 12.6495    | 1         |
| cg26821293                     | FAM83C                       | 0.00439567        | 0.00439567           | 0.32609            | -3.06663                     | T down vs N                            | 10.977  | 11.7611   | 17.1428    | 1         |
| cg26826183                     | EIF3G                        | 1.17E-05          | 1.17E-05             | 0.245313           | -4.07643                     | T down vs N                            | 39.002  | 18.4949   | 7.58721    | 1         |
| cg26829529                     | SPACA3                       | 1.58E-05          | 1.58E-05             | 0.230092           | -4.34609                     | T down vs N                            | 37.029  | 20.2194   | 8.73661    | 1         |
| cg26831825                     | ORSD13                       | 0.00027364        | 0.000273639          | 0.296084           | -3.37742                     | T down vs N                            | 21.509  | 13.8747   | 10.3209    | 1         |
| cg26832879                     | PRPF31;TFPT                  | 0.00076347        | 0.000763471          | 0.298756           | -3.34722                     | T down vs N                            | 17.17   | 13.6706   | 12.7394    | 1         |
| cg26836273                     | PCNX12                       | 0.0003425         | 0.000342499          | 0.132847           | -7.52747                     | T down vs N                            | 20.511  | 38.1632   | 29.7707    | 1         |
| cg26836743                     | HSPC072;LOC100270804;HSPC072 | 1.80E-06          | 1.80E-06             | 0.180441           | -5.54198                     | T down vs N                            | 53.203  | 27.463    | 8.25914    | 1         |
| cg26837372                     | STK19;STK19;STK19;DOM3Z      | 0.00307973        | 0.00307973           | 0.319752           | -3.12742                     | T down vs N                            | 12.123  | 12.1767   | 16.0711    | 1         |
| cg26837477                     | ENTPD4;ENTPD4                | 0.00381427        | 0.00381427           | 0.281228           | -3.55583                     | T down vs N                            | 11.428  | 15.0731   | 21.1044    | 1         |
| cg26837962                     | C16orf45;C16orf45            | 0.00016072        | 0.00016072           | 0.24204            | -4.13155                     | T down vs N                            | 23.994  | 18.8501   | 12.5697    | 1         |
| cg26839284                     | AMPD2;AMPD2                  | 5.11E-05          | 5.11E-05             | 0.331343           | -3.01802                     | T down vs N                            | 29.954  | 11.4281   | 6.10441    | 1         |
| cg26839325                     | BMP15                        | 0.00017508        | 0.000175079          | 0.271343           | -3.68538                     | T down vs N                            | 23.583  | 15.9355   | 10.8114    | 1         |
| cg26839512                     | SPATA18                      | 2.66E-05          | 2.66E-05             | 0.116969           | -8.54924                     | T down vs N                            | 33.753  | 43.1278   | 20.444     | 1         |
| cg26839961                     | KIF18B                       | 0.00046695        | 0.000466946          | 0.270217           | -3.70073                     | T down vs N                            | 19.178  | 16.0372   | 13.3798    | 1         |
| cg26840068                     | OR2M7                        | 3.09E-05          | 3.09E-05             | 0.095997           | -10.417                      | T down vs N                            | 32.849  | 51.4361   | 25.0535    | 1         |
| cg26841309                     | IL1F7;IL1F7;IL1F7;IL1F7      | 1.64E-05          | 1.64E-05             | 0.245272           | -4.07711                     | T down vs N                            | 36.797  | 18.4993   | 8.04375    | 1         |
| cg26842423                     | DPP10;DPP10                  | 9.06E-05          | 9.06E-05             | 0.248974           | -4.01648                     | T down vs N                            | 26.868  | 18.107    | 10.7827    | 1         |
| cg26843324                     | LHX5                         | 1.62E-05          | 1.62E-05             | 0.123618           | -8.08942                     | T down vs N                            | 36.848  | 40.9341   | 17.7743    | 1         |
| cg26846864                     | MEFV                         | 0.00343351        | 0.00343351           | 0.274472           | -3.64336                     | T down vs N                            | 11.767  | 15.6565   | 21.289     | 1         |
| cg26847438                     | SP140L;SP140L                | 0.00038223        | 0.000382226          | 0.244813           | -4.08475                     | T down vs N                            | 20.033  | 18.5486   | 14.8148    | 1         |
| cg26847490                     | ASB4;ASB4                    | 0.00033246        | 0.000332461          | 0.214172           | -4.66914                     | T down vs N                            | 20.641  | 22.2409   | 17.24      | 1         |
| cg26848071                     | KIF1C                        | 1.64E-05          | 1.64E-05             | 0.331069           | -3.02052                     | T down vs N                            | 36.797  | 11.4452   | 4.97661    | 1         |
| cg26848126                     | CYSLTR1;CYSLTR1              | 0.00108725        | 0.00108725           | 0.273489           | -3.65646                     | T down vs N                            | 15.802  | 15.7436   | 15.9405    | 1         |
| cg26850144                     | FGF3                         | 0.00076469        | 0.000764692          | 0.330448           | -3.02619                     | T down vs N                            | 17.163  | 11.4841   | 10.7057    | 1         |
| cg26853415                     | NOS2;NOS2                    | 7.02E-05          | 7.02E-05             | 0.193007           | -5.18116                     | T down vs N                            | 28.211  | 25.346    | 14.3752    | 1         |
| cg26855689                     | HGS                          | 0.00066244        | 0.000662436          | 0.28431            | -3.51728                     | T down vs N                            | 17.736  | 14.8152   | 13.3648    | 1         |

| Probeset ID                   | UCSC_REFGENE_NAME               | p-value<br>(Type) | p-value (T vs.<br>N) | Ratio (T<br>vs. N) | Fold-<br>Change (T<br>vs. N) | Fold-Change (T vs.<br>N) (Description) | F(Type) | SS (Type) | SS (Error) | F (Error) |
|-------------------------------|---------------------------------|-------------------|----------------------|--------------------|------------------------------|----------------------------------------|---------|-----------|------------|-----------|
| PCDHGA4;PCDHGA2;PCDHGB2;PCDHG |                                 |                   |                      |                    |                              |                                        |         |           |            |           |
| cg26856475                    | A1;PCDHGB1;PCDHGA3;PCDHGB2      | 0.00125061        | 0.00125061           | 3.88337            | 3.88337                      | T up vs N                              | 15.278  | 17.2398   | 18.0544    | 1         |
| cg26858238                    | DAXX;DAXX;DAXX;DAXX             | 0.00029734        | 0.000297341          | 0.287222           | -3.48163                     | T down vs N                            | 21.136  | 14.5762   | 11.0341    | 1         |
| cg26859841                    | DUSP5P                          | 0.00020118        | 0.000201181          | 15.124             | 15.124                       | T up vs N                              | 22.925  | 69.1053   | 48.2302    | 1         |
| cg26860604                    | WWP2;WWP2;WWP2                  | 0.00569011        | 0.00569011           | 0.21154            | -4.72723                     | T down vs N                            | 10.179  | 22.5993   | 35.5219    | 1         |
| cg26861995                    | RUVBL1                          | 4.32E-06          | 4.32E-06             | 0.161965           | -6.17417                     | T down vs N                            | 46.139  | 31.0373   | 10.7631    | 1         |
| cg26863842                    | BAT1;BAT1                       | 0.00052936        | 0.000529358          | 0.325498           | -3.07221                     | T down vs N                            | 18.653  | 11.7993   | 10.1209    | 1         |
| cg26866263                    | DNAH8                           | 0.00010936        | 0.000109356          | 3.18855            | 3.18855                      | T up vs N                              | 25.901  | 12.5937   | 7.77969    | 1         |
| cg26866325                    | PPBPL2                          | 0.00232185        | 0.00232185           | 0.257258           | -3.88714                     | T down vs N                            | 13.072  | 17.2645   | 21.1316    | 1         |
| cg26870725                    | MAST1                           | 0.00022078        | 0.000220779          | 6.73819            | 6.73819                      | T up vs N                              | 22.491  | 34.0897   | 24.2509    | 1         |
| cg26871959                    | SKAP1;SKAP1                     | 0.00015737        | 0.000157365          | 0.140176           | -7.13386                     | T down vs N                            | 24.096  | 36.1594   | 24.0098    | 1         |
| cg26872028                    | ST8SIA4;ST8SIA4                 | 5.19E-05          | 5.19E-05             | 3.6378             | 3.6378                       | T up vs N                              | 29.865  | 15.6196   | 8.36815    | 1         |
| cg26872742                    | MYO10                           | 0.00216337        | 0.00216337           | 0.252609           | -3.95869                     | T down vs N                            | 13.315  | 17.7314   | 21.3069    | 1         |
| cg26874693                    | CUX2                            | 9.47E-06          | 9.47E-06             | 0.129908           | -7.69775                     | T down vs N                            | 40.444  | 39.0137   | 15.4342    | 1         |
| cg26875384                    | FAM107B                         | 0.00119898        | 0.00119898           | 0.323801           | -3.0048                      | T down vs N                            | 15.435  | 11.3374   | 11.7525    | 1         |
| cg26875450                    | ADAMTSL4;ADAMTSL4               | 4.04E-06          | 4.04E-06             | 0.099545           | -10.0457                     | T down vs N                            | 46.648  | 49.8552   | 17.0999    | 1         |
| cg26875655                    | CUX2                            | 3.67E-05          | 3.67E-05             | 0.315285           | -3.17173                     | T down vs N                            | 31.842  | 12.4791   | 6.27055    | 1         |
| cg26876444                    | LEPR;LEPR;LEPROT;LEPR           | 0.00018144        | 0.000181437          | 0.2178             | -4.59137                     | T down vs N                            | 23.413  | 21.7587   | 14.8693    | 1         |
| cg26876647                    | RUSC1;RUSC1;C1orf104            | 0.00015263        | 0.000152632          | 4.35106            | 4.35106                      | T up vs N                              | 24.245  | 20.2509   | 13.3644    | 1         |
| cg26876834                    | SNHG9;SNORA64;SNORA10;RPS2      | 0.00013756        | 0.000137562          | 0.254774           | -3.92504                     | T down vs N                            | 24.753  | 17.5121   | 11.3194    | 1         |
| cg26876974                    | MSC                             | 0.00058328        | 0.000583284          | 5.56442            | 5.56442                      | T up vs N                              | 18.253  | 27.5928   | 24.1865    | 1         |
| cg26877565                    | LY6G6C                          | 1.30E-06          | 1.30E-06             | 0.294523           | -3.39532                     | T down vs N                            | 56.007  | 13.9954   | 3.99819    | 1         |
| cg26880412                    | ZNF479                          | 6.25E-05          | 6.25E-05             | 0.24338            | -4.1088                      | T down vs N                            | 28.843  | 18.7036   | 10.3754    | 1         |
| cg26881651                    | FREM2                           | 5.79E-05          | 5.79E-05             | 0.30676            | -3.25987                     | T down vs N                            | 29.263  | 13.0788   | 7.15115    | 1         |
| cg26882204                    | CTBS                            | 0.00013715        | 0.000137148          | 0.257044           | -3.89039                     | T down vs N                            | 24.768  | 17.2857   | 11.1663    | 1         |
| cg26883963                    | SLAMF1                          | 0.00187427        | 0.00187427           | 0.262109           | -3.8152                      | T down vs N                            | 13.815  | 16.7926   | 19.4481    | 1         |
| cg26884027                    | PTPRU;PTPRU;PTPRU               | 0.00198397        | 0.00198397           | 11.3987            | 11.3987                      | T up vs N                              | 13.616  | 55.4656   | 65.1777    | 1         |
| cg26884667                    | CIB4                            | 0.0001039         | 0.000103896          | 0.171902           | -5.81728                     | T down vs N                            | 26.161  | 29.0401   | 17.7607    | 1         |
| cg26885619                    | KRTAP17-1;KRTAP17-1             | 0.00019745        | 0.000197445          | 0.174257           | -5.73864                     | T down vs N                            | 23.013  | 28.5929   | 19.8792    | 1         |
| cg26886875                    | C6orf47                         | 0.00029523        | 0.000295231          | 0.312604           | -3.19893                     | T down vs N                            | 21.168  | 12.6644   | 9.57246    | 1         |
| cg26886976                    | CD300LD;C17orf77                | 0.00069836        | 0.000698364          | 0.248892           | -4.01781                     | T down vs N                            | 17.524  | 18.1155   | 16.5398    | 1         |
| cg26888063                    | EDAR                            | 2.12E-05          | 2.12E-05             | 0.237267           | -4.21466                     | T down vs N                            | 35.152  | 19.3831   | 8.82266    | 1         |
| cg26888836                    | TEC                             | 0.0006497         | 0.000649701          | 28.7691            | 28.7691                      | T up vs N                              | 17.815  | 105.696   | 94.9295    | 1         |
|                               |                                 |                   |                      |                    |                              |                                        |         |           |            |           |
| cg26891645                    | HNRNPCL1;LOC649330;LOC649330    | 2.31E-06          | 2.31E-06             | 0.165075           | -6.05785                     | T down vs N                            | 51.119  | 30.3921   | 9.51254    | 1         |
| cg26892635                    | OR1F1                           | 0.00079665        | 0.000796647          | 0.30699            | -3.25744                     | T down vs N                            | 17.002  | 13.0623   | 12.2926    | 1         |
| cg26893134                    | FRK;FRK                         | 1.47E-05          | 1.47E-05             | 0.235871           | -4.23961                     | T down vs N                            | 37.503  | 19.5425   | 8.33745    | 1         |
| AMACR;AMACR;AMACR;AMACR;AMA   |                                 |                   |                      |                    |                              |                                        |         |           |            |           |
| cg26893816                    | CR                              | 0.00034057        | 0.000340567          | 0.244894           | -4.0834                      | T down vs N                            | 20.535  | 18.5399   | 14.4453    | 1         |
| cg26896569                    | LOC400752                       | 0.001361          | 0.001361             | 0.160741           | -6.22119                     | T down vs N                            | 14.966  | 31.2965   | 33.4592    | 1         |
| cg26896979                    | APITD1;APITD1;APITD1            | 0.00035741        | 0.000357409          | 0.301311           | -3.31883                     | T down vs N                            | 20.324  | 13.4786   | 10.6109    | 1         |
| cg26900781                    | GABRB1                          | 0.00023171        | 0.000231707          | 0.214158           | -4.66944                     | T down vs N                            | 22.268  | 22.2428   | 15.9819    | 1         |
| cg26902026                    | SNX19                           | 0.00011228        | 0.000112281          | 0.273682           | -3.65388                     | T down vs N                            | 25.767  | 15.7264   | 9.76536    | 1         |
| cg26908505                    | KIRREL3;KIRREL3                 | 1.50E-05          | 1.50E-05             | 0.266614           | -3.75074                     | T down vs N                            | 37.349  | 16.3679   | 7.01198    | 1         |
| cg26910511                    | LRFN1                           | 0.00021559        | 0.000215594          | 5.50647            | 5.50647                      | T up vs N                              | 22.602  | 27.2572   | 19.2956    | 1         |
| cg26912251                    | SMOC2;SMOC2                     | 3.72E-06          | 3.72E-06             | 0.313692           | -3.18784                     | T down vs N                            | 47.3    | 12.5888   | 4.25837    | 1         |
| cg26912592                    | LASP1                           | 0.0061076         | 0.0061076            | 4.27562            | 4.27562                      | T up vs N                              | 9.9653  | 19.772    | 31.7454    | 1         |
|                               |                                 |                   |                      |                    |                              |                                        |         |           |            |           |
| cg26913669                    | COL11A1;COL11A1;COL11A1;COL11A1 | 0.00022127        | 0.000221266          | 0.291058           | -3.43574                     | T down vs N                            | 22.481  | 14.2678   | 10.1545    | 1         |
| cg26916916                    | NTN1                            | 0.00021999        | 0.000219992          | 0.167539           | -5.96877                     | T down vs N                            | 22.508  | 29.8942   | 21.2506    | 1         |
| cg26919186                    | LOC390858                       | 6.74E-05          | 6.74E-05             | 0.333076           | -3.00232                     | T down vs N                            | 28.43   | 11.3204   | 6.37107    | 1         |
| cg26919735                    | LCE2C;LCE2C                     | 0.00322153        | 0.00322153           | 0.319748           | -3.12746                     | T down vs N                            | 11.975  | 12.177    | 16.27      | 1         |
| cg26919780                    | HMH81                           | 0.00010564        | 0.000105638          | 0.247453           | -4.04118                     | T down vs N                            | 26.076  | 18.267    | 11.2083    | 1         |
| cg26923629                    | C16orf71                        | 0.00054986        | 0.000549855          | 0.265939           | -3.76027                     | T down vs N                            | 18.496  | 16.4308   | 14.2135    | 1         |
| cg26924127                    | RD3;RD3                         | 0.000543          | 0.000543003          | 0.326048           | -3.06704                     | T down vs N                            | 18.548  | 11.7639   | 10.1479    | 1         |
| cg26924440                    | IFFO2                           | 0.00240913        | 0.00240913           | 0.219771           | -4.5502                      | T down vs N                            | 12.946  | 21.5023   | 26.5749    | 1         |
| cg26925226                    | UBL7;UBL7                       | 0.00027237        | 0.000272365          | 0.292798           | -3.41533                     | T down vs N                            | 21.53   | 14.1303   | 10.5008    | 1         |
| cg26928531                    | HLA-DRA;HLA-DRA                 | 1.52E-05          | 1.52E-05             | 0.310735           | -3.21818                     | T down vs N                            | 37.282  | 12.7954   | 5.49137    | 1         |
| cg26928766                    | CENPT                           | 1.50E-05          | 1.50E-05             | 0.27417            | -3.64737                     | T down vs N                            | 37.374  | 15.6832   | 6.71412    | 1         |
| cg26929163                    | LOC283914;LOC283914             | 2.73E-06          | 2.73E-06             | 0.277025           | -3.60978                     | T down vs N                            | 49.758  | 15.4331   | 4.96266    | 1         |
| cg26929700                    | ZNF423                          | 2.65E-05          | 2.65E-05             | 0.146471           | -6.82729                     | T down vs N                            | 33.774  | 34.5608   | 16.3727    | 1         |
| cg26932018                    | FAAH2                           | 0.000568          | 0.000568001          | 0.270801           | -3.69275                     | T down vs N                            | 18.362  | 15.9844   | 13.928     | 1         |
| cg26932889                    | GLIS1                           | 0.00019854        | 0.000198535          | 0.293946           | -3.40199                     | T down vs N                            | 22.987  | 14.0404   | 9.77262    | 1         |
| cg26935570                    | DERA                            | 4.72E-05          | 4.72E-05             | 0.240179           | -4.16356                     | T down vs N                            | 30.392  | 19.0557   | 10.0319    | 1         |
| cg26937500                    | CARD11;CARD11                   | 0.00283095        | 0.00283095           | 6.89084            | 6.89084                      | T up vs N                              | 12.402  | 34.895    | 45.018     | 1         |
| cg26938014                    | PRDM6                           | 0.00013882        | 0.000138817          | 0.296913           | -3.36799                     | T down vs N                            | 24.709  | 13.811    | 8.94326    | 1         |
| cg26938159                    | C13orf35                        | 9.63E-07          | 9.63E-07             | 0.157245           | -6.35949                     | T down vs N                            | 58.742  | 32.0539   | 8.73078    | 1         |
| cg26939283                    | KPRP                            | 0.00018959        | 0.000189588          | 0.18908            | -5.28877                     | T down vs N                            | 23.205  | 25.9834   | 17.9158    | 1         |
| cg26943658                    | KIAA1033;KIAA1033               | 0.00424951        | 0.00424951           | 0.239437           | -4.17646                     | T down vs N                            | 17.293  | 9.45111   | 3.8256     | 1         |
| cg26948064                    | LOC100287834;LOC100287704       | 0.00167201        | 0.00167201           | 0.265743           | -3.76304                     | T down vs N                            | 14.22   | 16.4491   | 18.5076    | 1         |
| cg26950531                    | DPF1;DPF1;DPF1                  | 0.00060513        | 0.000605133          | 0.304659           | -3.28236                     | T down vs N                            | 18.103  | 13.2314   | 11.6943    | 1         |

| Probeset ID | UCSC_REFGENE_NAME       | p-value<br>(Type) | p-value (T vs.<br>N) | Ratio (T<br>vs. N) | Fold-<br>Change (T<br>vs. N) | Fold-Change (T vs.<br>N) (Description) | F(Type) | SS (Type) | SS (Error) | F (Error) |
|-------------|-------------------------|-------------------|----------------------|--------------------|------------------------------|----------------------------------------|---------|-----------|------------|-----------|
| cg26953234  | GPC4                    | 3.41E-05          | 3.41E-05             | 0.323132           | -3.09471                     | T down vs N                            | 32.266  | 11.9532   | 5.92737    | 1         |
| cg26953640  | BHLHA9                  | 0.0006781         | 0.000678104          | 6.83128            | 6.83128                      | T up vs N                              | 17.642  | 34.5818   | 31.3626    | 1         |
| cg26954138  | C11orf60;C11orf60       | 3.30E-06          | 3.30E-06             | 0.154463           | -6.47405                     | T down vs N                            | 48.224  | 32.6756   | 10.8413    | 1         |
| cg26954519  | MB;MB;MB                | 6.04E-06          | 6.04E-06             | 0.292783           | -3.4155                      | T down vs N                            | 43.645  | 14.1315   | 5.18055    | 1         |
| cg26955290  | ASGR2;ASGR2;ASGR2;ASGR2 | 0.00228193        | 0.00228193           | 0.322772           | -3.09816                     | T down vs N                            | 13.131  | 11.9768   | 14.5932    | 1         |
| cg26955850  | OXT                     | 5.31E-05          | 5.31E-05             | 4.15472            | 4.15472                      | T up vs N                              | 29.738  | 18.999    | 10.2222    | 1         |
| cg26956135  | C17orf47;C17orf47       | 4.83E-05          | 4.83E-05             | 0.198214           | -5.04504                     | T down vs N                            | 30.268  | 24.5322   | 12.9679    | 1         |
| cg26958524  | FOX11                   | 0.00125958        | 0.00125958           | 11.1992            | 11.1992                      | T up vs N                              | 15.252  | 54.6637   | 57.3463    | 1         |
| cg26960083  | EPHA1                   | 0.00381294        | 0.00381294           | 4.08593            | 4.08593                      | T up vs N                              | 11.429  | 18.5562   | 25.9787    | 1         |
| cg26960322  | CXCR7                   | 0.00012751        | 0.000127507          | 0.170533           | -5.86398                     | T down vs N                            | 25.129  | 29.3044   | 18.6584    | 1         |
| cg26960333  | GPC5                    | 0.00209489        | 0.00209489           | 3.43236            | 3.43236                      | T up vs N                              | 13.426  | 14.245    | 16.9755    | 1         |
| cg26961808  | FLNC;FLNC               | 3.44E-05          | 3.44E-05             | 4.28877            | 4.28877                      | T up vs N                              | 32.224  | 19.8557   | 9.85871    | 1         |
| cg26963277  | KCNQ10T1;KCNQ1;KCNQ1    | 0.00014091        | 0.00014091           | 0.188539           | -5.30394                     | T down vs N                            | 24.635  | 26.0728   | 16.9337    | 1         |
| cg26966582  | CAMK1D;CAMK1D           | 3.39E-06          | 3.39E-06             | 0.281433           | -3.55324                     | T down vs N                            | 48.03   | 15.0558   | 5.01551    | 1         |
| cg26968544  | SPOCK1                  | 3.26E-05          | 3.26E-05             | 0.309295           | -3.23315                     | T down vs N                            | 32.529  | 12.8972   | 6.34373    | 1         |
| cg26969937  | PTPRN2;PTPRN2;PTPRN2    | 0.00040934        | 0.000409338          | 0.207699           | -4.81465                     | T down vs N                            | 19.738  | 23.1356   | 18.7547    | 1         |
| cg26970800  | GIF                     | 0.00120662        | 0.00120662           | 0.23066            | -4.33538                     | T down vs N                            | 15.411  | 20.1516   | 20.9215    | 1         |
| cg26973714  | TXNRD1                  | 0.00692408        | 0.00692408           | 3.72281            | 3.72281                      | T up vs N                              | 9.5911  | 16.1833   | 26.9974    | 1         |
| cg26974276  | ERICH1                  | 0.00015419        | 0.000154194          | 0.149889           | -6.6716                      | T down vs N                            | 24.195  | 33.3757   | 22.3091    | 1         |
| cg26974444  | SNX29                   | 1.51E-05          | 1.51E-05             | 0.329243           | -3.03727                     | T down vs N                            | 37.311  | 11.56     | 4.95723    | 1         |
| cg26975461  | USP53                   | 0.00057241        | 0.000572406          | 0.331228           | -3.01907                     | T down vs N                            | 18.331  | 11.4353   | 9.98136    | 1         |
| cg26977256  | TNXB                    | 0.00261317        | 0.00261317           | 0.267797           | -3.73417                     | T down vs N                            | 12.671  | 16.2584   | 20.5308    | 1         |
| cg26978172  | DDAH2                   | 0.00023046        | 0.00023046           | 7.49134            | 7.49134                      | T up vs N                              | 22.293  | 37.9814   | 27.26      | 1         |
| cg26979504  | HHEX                    | 0.00038143        | 0.000381426          | 0.270932           | -3.69096                     | T down vs N                            | 20.042  | 15.9725   | 12.7515    | 1         |
| cg26980954  | SIGLEC8                 | 0.00070228        | 0.000702279          | 0.226667           | -4.41176                     | T down vs N                            | 17.502  | 20.6343   | 18.8636    | 1         |
| cg26980996  | BAIAP2L1                | 0.00131662        | 0.00131662           | 0.280545           | -3.5645                      | T down vs N                            | 15.088  | 15.131    | 16.0459    | 1         |
| cg26981809  | TBKBP1                  | 2.17E-06          | 2.17E-06             | 5.46255            | 5.46255                      | T up vs N                              | 51.645  | 27.0019   | 8.36534    | 1         |
| cg26982390  | NHS                     | 0.00010635        | 0.000106348          | 0.300579           | -3.32691                     | T down vs N                            | 26.042  | 13.5332   | 8.31461    | 1         |
| cg26986180  | DNAH10                  | 0.00057693        | 0.00057693           | 3.60904            | 3.60904                      | T up vs N                              | 18.298  | 15.4281   | 13.4904    | 1         |
| cg26987453  | MFHAS1                  | 0.00035351        | 0.000353506          | 0.305123           | -3.27737                     | T down vs N                            | 20.372  | 13.1975   | 10.3652    | 1         |
| cg26987613  | VP52                    | 8.62E-05          | 8.62E-05             | 0.302411           | -3.30676                     | T down vs N                            | 27.127  | 13.3968   | 7.90181    | 1         |
| cg26987645  | FMOD                    | 1.70E-05          | 1.70E-05             | 0.280804           | -3.56121                     | T down vs N                            | 36.556  | 15.1091   | 6.61308    | 1         |
| cg26987660  | PHOX2A                  | 1.29E-05          | 1.29E-05             | 7.09601            | 7.09601                      | T up vs N                              | 38.36   | 35.9639   | 15.0006    | 1         |
| cg26988617  | PAR3                    | 6.20E-05          | 6.20E-05             | 0.216266           | -4.62393                     | T down vs N                            | 28.883  | 21.9609   | 12.1655    | 1         |
| cg26990332  | CALD1;CALD1;CALD1       | 0.00138882        | 0.00138882           | 0.308362           | -3.24294                     | T down vs N                            | 14.892  | 12.9637   | 13.9286    | 1         |
| cg26992634  | UBTD2                   | 0.00227421        | 0.00227421           | 0.209369           | -4.77625                     | T down vs N                            | 13.143  | 22.9004   | 27.8785    | 1         |
| cg26992949  | DNAH5                   | 0.00012198        | 0.000121977          | 0.227951           | -4.38691                     | T down vs N                            | 25.35   | 20.4775   | 12.9245    | 1         |
| cg26993947  | TMEM211                 | 1.38E-05          | 1.38E-05             | 0.185208           | -5.39933                     | T down vs N                            | 37.924  | 26.6329   | 11.2364    | 1         |
| cg26999423  | GAS7                    | 0.00184828        | 0.00184828           | 0.264697           | -3.7779                      | T down vs N                            | 14.649  | 14.4787   | 13.8376    | 1         |
| cg27000944  | C17orf95;JMJD6;JMJD6    | 0.00015731        | 0.000157314          | 0.261486           | -3.8243                      | T down vs N                            | 24.098  | 16.8524   | 11.1892    | 1         |
| cg27003782  | CPXM2;CPXM2             | 6.86E-06          | 6.86E-06             | 20.4297            | 20.4297                      | T up vs N                              | 42.718  | 85.2528   | 31.9313    | 1         |
| cg27005118  | COX10                   | 1.80E-05          | 1.80E-05             | 0.214416           | -4.66383                     | T down vs N                            | 36.19   | 22.2081   | 9.81836    | 1         |
| cg27006721  | ARHGAP22                | 3.50E-05          | 3.50E-05             | 0.262592           | -3.80819                     | T down vs N                            | 32.109  | 16.7465   | 8.34475    | 1         |
| cg27008363  | HOXC4;HOXC4             | 2.40E-05          | 2.40E-05             | 0.275379           | -3.63135                     | T down vs N                            | 34.391  | 15.5767   | 7.24682    | 1         |
| cg27008678  | MS4A4A                  | 0.00130325        | 0.00130325           | 0.304692           | -3.28201                     | T down vs N                            | 15.125  | 13.229    | 13.9939    | 1         |
| cg27009246  | HBG2                    | 9.81E-05          | 9.81E-05             | 0.260207           | -3.84309                     | T down vs N                            | 26.454  | 16.9758   | 10.2673    | 1         |
| cg27009545  | TM6SF1;TM6SF1           | 3.37E-05          | 3.37E-05             | 0.304564           | -3.28338                     | T down vs N                            | 32.332  | 13.2383   | 6.55115    | 1         |
| cg27015047  | DMBT1;DMBT1;DMBT1       | 7.52E-08          | 7.52E-08             | 0.143109           | -6.9877                      | T down vs N                            | 86.394  | 35.4015   | 6.55633    | 1         |
| cg27017482  | NRXN2;NRXN2             | 2.25E-05          | 2.25E-05             | 4.49873            | 4.49873                      | T up vs N                              | 34.79   | 21.1807   | 9.74104    | 1         |
| cg27021520  | CLASP2                  | 7.45E-07          | 7.45E-07             | 0.169726           | -5.89185                     | T down vs N                            | 61.147  | 29.4617   | 7.70914    | 1         |
| cg27025137  | SLC39A11;SLC39A11       | 6.36E-05          | 6.36E-05             | 0.190255           | -5.25611                     | T down vs N                            | 28.742  | 25.7905   | 14.3568    | 1         |
| cg27026360  | TMEM132E                | 0.00202445        | 0.00202445           | 5.38819            | 5.38819                      | T up vs N                              | 13.545  | 26.5677   | 31.3822    | 1         |
| cg27029238  | BRUNOL5                 | 0.00077382        | 0.000773819          | 4.36974            | 4.36974                      | T up vs N                              | 17.116  | 20.3691   | 19.0406    | 1         |
| cg27030541  | REXO1L2P                | 0.00145096        | 0.00145096           | 0.203095           | -4.9238                      | T down vs N                            | 14.732  | 23.8003   | 25.8491    | 1         |
| cg27033805  | BOP1                    | 0.00542354        | 0.00542354           | 0.329648           | -3.03353                     | T down vs N                            | 10.326  | 11.5344   | 17.8732    | 1         |
| cg27034150  | SULT1A1                 | 0.00187671        | 0.00187671           | 4.20507            | 4.20507                      | T up vs N                              | 13.811  | 19.3218   | 22.3846    | 1         |
| cg27036341  | GAPDHS                  | 0.00130751        | 0.00130751           | 0.218936           | -4.56754                     | T down vs N                            | 15.113  | 21.6104   | 22.8782    | 1         |
| cg27040708  | CGB8                    | 9.59E-05          | 9.59E-05             | 0.270382           | -3.69847                     | T down vs N                            | 26.572  | 16.0222   | 9.64754    | 1         |
| cg27041022  | MAGEA3                  | 2.00E-06          | 2.00E-06             | 0.239854           | -4.1692                      | T down vs N                            | 52.309  | 19.0919   | 5.83979    | 1         |
| cg27041304  | SPRY4;SPRY4             | 0.00172184        | 0.00172184           | 3.1481             | 3.1481                       | T up vs N                              | 14.116  | 12.3179   | 13.9623    | 1         |
| cg27045062  | EFNA3                   | 0.00251367        | 0.00251367           | 9.72366            | 9.72366                      | T up vs N                              | 13.114  | 45.6067   | 52.1676    | 1         |
| cg27052403  | TTC12                   | 9.52E-06          | 9.52E-06             | 40.3512            | 40.3512                      | T up vs N                              | 40.41   | 128.058   | 50.7041    | 1         |
| cg27055580  | DGAT2L6                 | 0.00015166        | 0.000151664          | 0.320628           | -3.11888                     | T down vs N                            | 24.276  | 12.1184   | 7.98721    | 1         |
| cg27055685  | PFND6;WDR46;WDR46       | 1.96E-05          | 1.96E-05             | 0.280641           | -3.56328                     | T down vs N                            | 35.631  | 15.1229   | 6.7908     | 1         |
| cg27055759  | STEAP1                  | 2.93E-05          | 2.93E-05             | 0.311885           | -3.20631                     | T down vs N                            | 33.177  | 12.7146   | 6.13186    | 1         |
| cg27056119  | SERPINB1                | 9.64E-05          | 9.64E-05             | 15.8635            | 15.8635                      | T up vs N                              | 26.543  | 71.5558   | 43.1335    | 1         |
| cg27056194  | KCNJ1;KCNJ1;KCNJ1;KCNJ1 | 7.51E-05          | 7.51E-05             | 0.247505           | -4.04032                     | T down vs N                            | 27.85   | 18.2614   | 10.4912    | 1         |
| cg27058052  | MIR498                  | 0.00021841        | 0.000218411          | 0.280586           | -3.56397                     | T down vs N                            | 22.542  | 15.1275   | 10.7376    | 1         |
| cg27058221  | PLA2G10                 | 4.44E-06          | 4.44E-06             | 0.136615           | -7.31984                     | T down vs N                            | 45.938  | 37.1129   | 12.9262    | 1         |
| cg27062116  | SNORD115-41             | 0.00328077        | 0.00328077           | 0.324469           | -3.08196                     | T down vs N                            | 11.915  | 11.866    | 15.9339    | 1         |
| cg27062571  | FER1L6                  | 0.00109338        | 0.00109338           | 0.282625           | -3.53825                     | T down vs N                            | 15.781  | 14.9556   | 15.1631    | 1         |
| cg27063969  | DOCK2                   | 3.72E-05          | 3.72E-05             | 0.317662           | -3.148                       | T down vs N                            | 31.761  | 12.3172   | 6.20503    | 1         |

| Probeset ID                    | UCSC_REFGENE_NAME               | p-value<br>(Type) | p-value (T vs.<br>N) | Ratio (T<br>vs. N) | Fold-<br>Change (T<br>vs. N) | Fold-Change (T vs.<br>N) (Description) | F(Type) | SS (Type) | SS (Error) | F (Error) |
|--------------------------------|---------------------------------|-------------------|----------------------|--------------------|------------------------------|----------------------------------------|---------|-----------|------------|-----------|
| cg27064287                     | BANK1;BANK1                     | 0.00013084        | 0.000130842          | 11.2671            | 11.2671                      | T up vs N                              | 25.001  | 54.9374   | 35.1586    | 1         |
| cg27064482                     | MKL2                            | 0.00093849        | 0.00093849           | 0.316279           | -3.16177                     | T down vs N                            | 16.364  | 12.4111   | 12.1352    | 1         |
| cg27064521                     | BLVRB                           | 0.00049071        | 0.000490714          | 0.192606           | -5.19195                     | T down vs N                            | 18.969  | 25.4101   | 21.4328    | 1         |
| cg27065876                     | IGFALS;IGFALS;IGFALS            | 0.00033791        | 0.000337906          | 0.320547           | -3.11966                     | T down vs N                            | 20.57   | 12.1237   | 9.43035    | 1         |
| cg27067035                     | IL1F9                           | 8.28E-07          | 8.28E-07             | 0.316234           | -3.16221                     | T down vs N                            | 60.143  | 12.4142   | 3.30256    | 1         |
| cg27068490                     | TTC12                           | 0.00012043        | 0.000120425          | 43.0761            | 43.0761                      | T up vs N                              | 25.415  | 132.624   | 83.4952    | 1         |
| cg27068996                     | KLK9                            | 0.00642739        | 0.00642739           | 0.286188           | -3.49421                     | T down vs N                            | 9.8123  | 14.6606   | 23.9056    | 1         |
| cg27072012                     | CCDC64B                         | 0.00019196        | 0.000191959          | 6.30303            | 6.30303                      | T up vs N                              | 23.146  | 31.7456   | 21.9445    | 1         |
| cg27072506                     | BTNL2                           | 0.00073805        | 0.000738048          | 0.309841           | -3.22746                     | T down vs N                            | 17.304  | 12.8585   | 11.8896    | 1         |
| cg27079726                     | PKDREJ                          | 0.00038994        | 0.000389936          | 3.6689             | 3.6689                       | T up vs N                              | 19.946  | 15.8262   | 12.695     | 1         |
| PCDHA2;PCDHA1;PCDHA3;PCDHA3;PC |                                 |                   |                      |                    |                              |                                        |         |           |            |           |
| cg27080348                     | DHA1                            | 1.19E-05          | 1.19E-05             | 3.75849            | 3.75849                      | T up vs N                              | 38.869  | 16.4191   | 6.75873    | 1         |
| cg27082921                     | ATP8B3                          | 0.00125438        | 0.00125438           | 0.177802           | -5.62422                     | T down vs N                            | 15.267  | 27.9375   | 29.2791    | 1         |
| cg27086014                     | SIGLEC12;SIGLEC12;SIGLEC12      | 0.00361664        | 0.00361664           | 0.288283           | -3.46881                     | T down vs N                            | 11.599  | 14.4901   | 19.9888    | 1         |
| cg27087809                     | ACSBG1                          | 9.07E-05          | 9.07E-05             | 0.269411           | -3.7118                      | T down vs N                            | 26.863  | 16.1105   | 9.5955     | 1         |
| cg27088491                     | KIFC1                           | 0.00024328        | 0.000243275          | 0.279738           | -3.57478                     | T down vs N                            | 22.044  | 15.1997   | 11.0322    | 1         |
| cg27089768                     | TCL1A;TCL1A                     | 0.00010108        | 0.000101081          | 6.78975            | 6.78975                      | T up vs N                              | 26.302  | 34.3627   | 20.9037    | 1         |
| cg27090087                     | TINAG                           | 5.03E-05          | 5.03E-05             | 0.229242           | -4.3622                      | T down vs N                            | 30.042  | 20.3214   | 10.8229    | 1         |
| cg27092752                     | USP2;USP2                       | 0.00473609        | 0.00473609           | 3.99232            | 3.99232                      | T up vs N                              | 10.744  | 17.9502   | 26.7323    | 1         |
| cg27093637                     | ORS1M1                          | 7.72E-06          | 7.72E-06             | 0.151173           | -6.61496                     | T down vs N                            | 41.872  | 33.4333   | 12.7753    | 1         |
| cg27094516                     | BAT5                            | 4.48E-05          | 4.48E-05             | 0.175774           | -5.68913                     | T down vs N                            | 30.69   | 28.31     | 14.759     | 1         |
| cg27095915                     | GMDS                            | 4.26E-05          | 4.26E-05             | 3.65772            | 3.65772                      | T up vs N                              | 30.976  | 15.752    | 8.13648    | 1         |
| cg27099991                     | NLRP2                           | 0.00268481        | 0.00268481           | 0.146646           | -6.81914                     | T down vs N                            | 12.58   | 34.5178   | 43.9035    | 1         |
|                                |                                 |                   |                      |                    |                              |                                        |         |           |            |           |
| cg27104271                     | SLCO2B1;SLCO2B1;SLCO2B1;SLCO2B1 | 4.41E-05          | 4.41E-05             | 0.265827           | -3.76184                     | T down vs N                            | 30.789  | 16.4412   | 8.54395    | 1         |
| cg27104671                     | OR8S1                           | 0.00133876        | 0.00133876           | 0.216249           | -4.6243                      | T down vs N                            | 15.026  | 21.9632   | 23.3864    | 1         |
| cg27105634                     | HBD                             | 4.93E-05          | 4.93E-05             | 0.196595           | -5.08659                     | T down vs N                            | 30.149  | 24.7815   | 13.1517    | 1         |
| cg27106909                     | YPEL3;YPEL3;YPEL3               | 7.51E-05          | 7.51E-05             | 3.44004            | 3.44004                      | T up vs N                              | 27.853  | 14.2967   | 8.21274    | 1         |
| cg27109284                     | NPEPPS                          | 3.49E-05          | 3.49E-05             | 0.26198            | -3.81708                     | T down vs N                            | 32.131  | 16.805    | 8.36822    | 1         |
| cg27109600                     | FLJ32063                        | 0.00010888        | 0.000108883          | 0.288007           | -3.47214                     | T down vs N                            | 26.983  | 13.6588   | 7.59289    | 1         |
| cg27111053                     | CADPS;CADPS;CADPS               | 7.08E-05          | 7.08E-05             | 0.219768           | -4.55026                     | T down vs N                            | 28.172  | 21.5027   | 12.2124    | 1         |
| cg27114640                     | IGSF21                          | 3.30E-05          | 3.30E-05             | 8.9486             | 8.9486                       | T up vs N                              | 32.466  | 44.9825   | 22.1682    | 1         |
| cg27114782                     | ARMC2                           | 0.00542803        | 0.00542803           | 0.214784           | -4.65584                     | T down vs N                            | 10.323  | 22.1586   | 34.3445    | 1         |
| cg27117509                     | OSR1                            | 2.68E-06          | 2.68E-06             | 16.4487            | 16.4487                      | T up vs N                              | 49.906  | 73.4437   | 23.5462    | 1         |
| cg27120125                     | TRIM27                          | 0.00055741        | 0.000557411          | 0.26566            | -3.76422                     | T down vs N                            | 18.44   | 16.4569   | 14.2795    | 1         |
| cg27120999                     | HSPA2                           | 0.00212867        | 0.00212867           | 4.76818            | 4.76818                      | T up vs N                              | 13.371  | 22.8509   | 27.3439    | 1         |
| cg27121758                     | S1PR4                           | 4.55E-07          | 4.55E-07             | 0.27924            | -3.58115                     | T down vs N                            | 65.972  | 15.2422   | 3.69665    | 1         |
| cg27122065                     | GTF2H4                          | 0.0016926         | 0.0016926            | 0.255942           | -3.90713                     | T down vs N                            | 14.177  | 17.3951   | 19.6324    | 1         |
| cg27123256                     | BCL11B;BCL11B                   | 0.00134754        | 0.00134754           | 0.210813           | -4.74355                     | T down vs N                            | 15.002  | 22.6997   | 24.2092    | 1         |
| cg27123464                     | TRPM2                           | 0.00059543        | 0.000595433          | 0.19023            | -5.25679                     | T down vs N                            | 18.169  | 25.7945   | 22.7151    | 1         |
| cg27123522                     | GPX5;GPX5                       | 1.50E-05          | 1.50E-05             | 0.134947           | -7.41031                     | T down vs N                            | 37.339  | 37.5723   | 16.0999    | 1         |
| cg27125505                     | LOC644172                       | 8.38E-05          | 8.38E-05             | 6.13261            | 6.13261                      | T up vs N                              | 27.273  | 30.8073   | 18.0736    | 1         |
| cg27125824                     | KNDC1                           | 0.00260384        | 0.00260384           | 0.300632           | -3.32632                     | T down vs N                            | 12.683  | 13.5293   | 17.0682    | 1         |
| cg27128011                     | ORS2B4                          | 8.51E-05          | 8.51E-05             | 0.182365           | -5.48351                     | T down vs N                            | 27.194  | 27.1238   | 15.9587    | 1         |
| cg27131821                     | IL2RA                           | 6.37E-05          | 6.37E-05             | 0.330154           | -3.02889                     | T down vs N                            | 28.74   | 11.5026   | 6.40358    | 1         |
| cg27132391                     | PRKCDBP                         | 3.90E-05          | 3.90E-05             | 6.70452            | 6.70452                      | T up vs N                              | 31.481  | 33.9109   | 17.235     | 1         |
| cg27134944                     | COMMD6;COMMD6                   | 0.00072699        | 0.000726989          | 0.239853           | -4.16923                     | T down vs N                            | 17.364  | 19.0921   | 17.5925    | 1         |
| cg27137430                     | RBM9;RBM9                       | 0.00020755        | 0.00020755           | 0.33263            | -3.00634                     | T down vs N                            | 22.779  | 11.348    | 7.97077    | 1         |
| cg27139836                     | CCDC108                         | 0.00353644        | 0.00353644           | 0.309046           | -3.23576                     | T down vs N                            | 11.671  | 12.915    | 17.7052    | 1         |
| cg27140058                     | BANK1;BANK1                     | 3.87E-06          | 3.87E-06             | 19.1706            | 19.1706                      | T up vs N                              | 46.985  | 81.6957   | 27.8202    | 1         |
| cg27141489                     | SRGN                            | 0.00152242        | 0.00152242           | 0.295678           | -3.38206                     | T down vs N                            | 14.557  | 13.906    | 15.2841    | 1         |
| cg27143326                     | ABHD6                           | 0.00010113        | 0.000101131          | 3.83126            | 3.83126                      | T up vs N                              | 26.299  | 16.8981   | 10.2805    | 1         |
| cg27145347                     | ALDH3B1;ALDH3B1;ALDH3B1         | 0.00013056        | 0.000130562          | 0.257509           | -3.88335                     | T down vs N                            | 25.012  | 17.2397   | 11.0283    | 1         |
| cg27147556                     | ARL4D                           | 0.00539736        | 0.00539736           | 3.14988            | 3.14988                      | T up vs N                              | 10.34   | 12.3301   | 19.0788    | 1         |
| cg27147615                     | LOC646982;LOC646982             | 2.84E-06          | 2.84E-06             | 0.183166           | -5.45954                     | T down vs N                            | 49.415  | 26.9843   | 8.73729    | 1         |
| cg27149471                     | ORST1                           | 1.62E-05          | 1.62E-05             | 0.19678            | -5.08183                     | T down vs N                            | 36.856  | 24.7529   | 10.7458    | 1         |
| cg27152208                     | TFAP2A                          | 1.04E-05          | 1.04E-05             | 0.295885           | -3.37969                     | T down vs N                            | 39.796  | 13.89     | 5.5845     | 1         |
| cg27152890                     | PPP1R13L;PPP1R13L               | 0.00010723        | 0.000107234          | 7.37752            | 7.37752                      | T up vs N                              | 26      | 37.4061   | 23.019     | 1         |
| cg27153327                     | C16orf73;C16orf73               | 1.81E-05          | 1.81E-05             | 0.211141           | -4.73617                     | T down vs N                            | 36.161  | 22.6543   | 10.0238    | 1         |
| cg27153655                     | SERPINA10;SERPINA10             | 1.64E-07          | 1.64E-07             | 0.218675           | -4.573                       | T down vs N                            | 77.004  | 21.6444   | 4.49729    | 1         |
| cg27153782                     | OLAH;OLAH                       | 0.00017075        | 0.00017075           | 0.311433           | -3.21096                     | T down vs N                            | 23.703  | 12.7463   | 8.60394    | 1         |
| cg27154418                     | GP6;GP6                         | 0.00410541        | 0.00410541           | 0.195053           | -5.12681                     | T down vs N                            | 11.193  | 25.022    | 35.7685    | 1         |
| cg27154941                     | WFDC1                           | 9.83E-05          | 9.83E-05             | 3.05396            | 3.05396                      | T up vs N                              | 26.445  | 11.6743   | 7.0633     | 1         |
|                                |                                 |                   |                      |                    |                              |                                        |         |           |            |           |
| cg27159719                     | TMEM71;TMEM71;TMEM71;TMEM71     | 4.12E-05          | 4.12E-05             | 0.214127           | -4.67012                     | T down vs N                            | 32.623  | 20.9383   | 9.62735    | 1         |
| cg27160284                     | GPR4                            | 0.00578381        | 0.00578381           | 0.262599           | -3.80809                     | T down vs N                            | 10.13   | 16.7458   | 26.4501    | 1         |
| cg27160395                     | HOXD4;MIR10B                    | 0.00043304        | 0.000433036          | 9.42626            | 9.42626                      | T up vs N                              | 19.497  | 47.1426   | 38.6869    | 1         |
| cg27163061                     | RPS6KA4;MIR1237;RPS6KA4         | 0.00025144        | 0.000251441          | 3.20801            | 3.20801                      | T up vs N                              | 21.893  | 12.7262   | 9.30062    | 1         |
| cg27164797                     | BAG2                            | 0.0019296         | 0.0019296            | 0.21247            | -4.70655                     | T down vs N                            | 13.713  | 22.4718   | 26.2194    | 1         |
| cg27167381                     | MIR506                          | 0.0003626         | 0.000362599          | 0.288999           | -3.46022                     | T down vs N                            | 20.261  | 14.4324   | 11.397     | 1         |
|                                |                                 |                   |                      |                    |                              |                                        |         |           |            |           |
| cg27168291                     | ZBTB22;TAPBP;TAPBP;TAPBP;ZBTB22 | 0.00041302        | 0.000413021          | 3.06647            | 3.06647                      | T up vs N                              | 19.699  | 11.76     | 9.55169    | 1         |

| Probeset ID | UCSC_REFGENE_NAME                         | p-value<br>(Type) | p-value (T vs.<br>N) | Ratio (T<br>vs. N) | Fold-<br>Change (T<br>vs. N) | Fold-Change (T vs.<br>N) (Description) | F(Type) | SS (Type) | SS (Error) | F (Error) |
|-------------|-------------------------------------------|-------------------|----------------------|--------------------|------------------------------|----------------------------------------|---------|-----------|------------|-----------|
| cg27168716  | C7orf28B<br>ABLM12;ABLM2;ABLM2;ABLM2;ABLI | 0.00572225        | 0.00572225           | 3.41573            | 3.41573                      | T up vs N                              | 10.162  | 14.133    | 22.2519    | 1         |
| cg27169846  | M2;ABLM2;ABLM2                            | 0.00157303        | 0.00157303           | 0.307227           | -3.25492                     | T down vs N                            | 14.439  | 13.0451   | 14.4551    | 1         |
| cg27170458  | TUBB3                                     | 3.39E-05          | 3.39E-05             | 0.220746           | -4.53009                     | T down vs N                            | 32.307  | 21.3768   | 10.5868    | 1         |
| cg27170947  | FAM59B                                    | 0.00023954        | 0.000239542          | 5.44365            | 5.44365                      | T up vs N                              | 22.115  | 26.8917   | 19.4559    | 1         |
| cg27171605  | WDR65;WDR65;WDR65;WDR65                   | 3.07E-05          | 3.07E-05             | 0.186311           | -5.36738                     | T down vs N                            | 32.899  | 26.4457   | 12.8614    | 1         |
| cg27173374  | GNG2                                      | 0.00511406        | 0.00511406           | 3.52457            | 3.52457                      | T up vs N                              | 10.506  | 14.864    | 22.6373    | 1         |
| cg27173971  | ODF3L2                                    | 0.00713962        | 0.00713962           | 0.231702           | -4.31588                     | T down vs N                            | 9.5006  | 20.0279   | 33.7291    | 1         |
| cg27175128  | RHOD                                      | 2.41E-06          | 2.41E-06             | 9.28748            | 9.28748                      | T up vs N                              | 50.756  | 46.5213   | 14.665     | 1         |
| cg27176394  | JSRP1                                     | 6.00E-06          | 6.00E-06             | 0.10359            | -9.65342                     | T down vs N                            | 43.684  | 48.1487   | 17.6352    | 1         |
| cg27176870  | SPINT2;SPINT2                             | 0.00212121        | 0.00212121           | 7.1906             | 7.1906                       | T up vs N                              | 13.383  | 36.4516   | 43.5791    | 1         |
| cg27177839  | JAG2;JAG2                                 | 0.00295606        | 0.00295606           | 3.4902             | 3.4902                       | T up vs N                              | 12.258  | 14.6337   | 19.1003    | 1         |
| cg27179041  | PTPRG                                     | 7.07E-05          | 7.07E-05             | 0.203197           | -4.92134                     | T down vs N                            | 28.178  | 23.7854   | 13.5058    | 1         |
| cg27179622  | LETTY2                                    | 1.46E-05          | 1.46E-05             | 16.0828            | 16.0828                      | T up vs N                              | 37.514  | 72.2683   | 30.8234    | 1         |
| cg27180492  | ZNF184                                    | 8.43E-05          | 8.43E-05             | 0.184301           | -5.42592                     | T down vs N                            | 27.244  | 26.7883   | 15.7323    | 1         |
| cg27180868  | TSTD1;TSTD1;TSTD1;TSTD1;TSTD1;TST         | 9.08E-06          | 9.08E-06             | 5.11826            | 5.11826                      | T up vs N                              | 40.737  | 24.971    | 9.80775    | 1         |
| cg27180880  | D1<br>MBP;MBP                             | 1.38E-05          | 1.38E-05             | 24.636             | 24.636                       | T up vs N                              | 37.893  | 96.162    | 40.6037    | 1         |
| cg27181716  | TF                                        | 0.00364047        | 0.00364047           | 3.13601            | 3.13601                      | T up vs N                              | 11.577  | 12.2354   | 16.9093    | 1         |
| cg27182133  | PEX14                                     | 2.13E-05          | 2.13E-05             | 0.215289           | -4.64493                     | T down vs N                            | 35.132  | 22.0911   | 10.0608    | 1         |
| cg27183456  | ALPK1;ALPK1                               | 6.32E-05          | 6.32E-05             | 6.67567            | 6.67567                      | T up vs N                              | 28.784  | 33.7574   | 18.7644    | 1         |
| cg27185978  | DOCK5                                     | 3.53E-06          | 3.53E-06             | 0.188489           | -5.30535                     | T down vs N                            | 47.713  | 26.0811   | 8.74598    | 1         |
| cg27187375  | RXFP4                                     | 1.98E-05          | 1.98E-05             | 0.134519           | -7.43389                     | T down vs N                            | 35.579  | 37.6916   | 16.9502    | 1         |
| cg27190145  | DAAM2                                     | 0.00117451        | 0.00117451           | 4.07309            | 4.07309                      | T up vs N                              | 15.512  | 18.4733   | 19.0545    | 1         |
| cg27191606  | OR8H2                                     | 1.14E-07          | 1.14E-07             | 0.232227           | -4.30613                     | T down vs N                            | 81.277  | 19.966    | 3.93048    | 1         |
| cg27197380  | HES7;HES7                                 | 0.00413021        | 0.00413021           | 5.20669            | 5.20669                      | T up vs N                              | 11.174  | 25.4976   | 36.5107    | 1         |
| cg27198997  | CCR9;CCR9                                 | 5.13E-06          | 5.13E-06             | 0.266851           | -3.74741                     | T down vs N                            | 44.851  | 16.346    | 5.83128    | 1         |
| cg27199697  | DLX3                                      | 0.0005827         | 0.000582701          | 0.295368           | -3.38561                     | T down vs N                            | 18.258  | 13.93     | 12.2076    | 1         |
| cg27200257  | PAHB                                      | 0.00075476        | 0.000754756          | 0.27127            | -3.68636                     | T down vs N                            | 17.215  | 15.942    | 14.8168    | 1         |
| cg27202210  | CHRNB4                                    | 1.61E-05          | 1.61E-05             | 10.3561            | 10.3561                      | T up vs N                              | 36.878  | 51.179    | 22.2045    | 1         |
| cg27203351  | UNC93A;UNC93A                             | 0.00020759        | 0.000207588          | 0.24664            | -4.05449                     | T down vs N                            | 22.778  | 18.3531   | 12.8916    | 1         |
| cg27203983  | OR1F2P                                    | 0.00213305        | 0.00213305           | 0.226846           | -4.40828                     | T down vs N                            | 13.364  | 20.6124   | 24.6783    | 1         |
| cg27206522  | LCE3A                                     | 2.81E-06          | 2.81E-06             | 0.324775           | -3.07905                     | T down vs N                            | 49.506  | 11.8461   | 3.82856    | 1         |
| cg27206976  | PLXNB2                                    | 3.69E-05          | 3.69E-05             | 4.62421            | 4.62421                      | T up vs N                              | 31.806  | 21.9627   | 11.0485    | 1         |
| cg27208903  | SLC7A5P1                                  | 0.0020939         | 0.0020939            | 7.40541            | 7.40541                      | T up vs N                              | 13.428  | 37.5475   | 44.7392    | 1         |
| cg27209722  | KANK3                                     | 1.77E-05          | 1.77E-05             | 0.290782           | -3.439                       | T down vs N                            | 36.305  | 14.2897   | 6.29762    | 1         |
| cg27210136  | SP6                                       | 0.00013559        | 0.000135585          | 0.173159           | -5.77503                     | T down vs N                            | 24.825  | 28.8001   | 18.5622    | 1         |
| cg27211696  | TMEM194B                                  | 0.00103215        | 0.00103215           | 0.310619           | -3.21938                     | T down vs N                            | 16      | 12.8035   | 12.8039    | 1         |
| cg27211894  | RUNX1;RUNX1                               | 0.00030084        | 0.000300844          | 3.60976            | 3.60976                      | T up vs N                              | 21.084  | 15.433    | 11.7116    | 1         |
| cg27216969  | PAOX;PAOX;PAOX                            | 0.00036508        | 0.000365083          | 4.6816             | 4.6816                       | T up vs N                              | 20.232  | 22.3179   | 17.65      | 1         |
| cg27218220  | TTL11;TTL11                               | 3.11E-05          | 3.11E-05             | 0.25692            | -3.89226                     | T down vs N                            | 32.82   | 17.2979   | 8.43285    | 1         |
| cg27218548  | WDR46;WDR46                               | 0.00095053        | 0.000950534          | 0.317822           | -3.14641                     | T down vs N                            | 16.315  | 12.3064   | 12.069     | 1         |
| cg27224069  | CCL11;CCL11                               | 0.00111947        | 0.00111947           | 0.182345           | -5.48411                     | T down vs N                            | 15.692  | 27.1273   | 27.6595    | 1         |
| cg27226920  | EBF4                                      | 0.00020807        | 0.000208074          | 12.1163            | 12.1163                      | T up vs N                              | 22.767  | 58.2836   | 40.9594    | 1         |
| cg27227042  | HEPH1L                                    | 3.52E-06          | 3.52E-06             | 0.214819           | -4.65508                     | T down vs N                            | 47.73   | 22.1539   | 7.42637    | 1         |
| cg27227742  | MATN4;MATN4;RBPJL;MATN4                   | 2.49E-05          | 2.49E-05             | 4.78899            | 4.78899                      | T up vs N                              | 34.146  | 22.9785   | 10.7672    | 1         |
| cg27229613  | ACTA1                                     | 0.00094159        | 0.000941591          | 4.8729             | 4.8729                       | T up vs N                              | 16.351  | 23.491    | 22.9867    | 1         |
| cg27230140  | EGFL8                                     | 0.00046882        | 0.000468815          | 3.58067            | 3.58067                      | T up vs N                              | 19.161  | 15.239    | 12.725     | 1         |
| cg27230510  | CACNA2D2;CACNA2D2                         | 4.85E-05          | 4.85E-05             | 0.312065           | -3.20447                     | T down vs N                            | 30.239  | 12.7021   | 6.72086    | 1         |
| cg27234864  | IL17D                                     | 0.0003905         | 0.000390501          | 4.50863            | 4.50863                      | T up vs N                              | 19.94   | 21.2426   | 17.0452    | 1         |
| cg27235557  | BTX;TIMM8A;TIMM8A                         | 0.00024993        | 0.000249934          | 0.241013           | -4.14916                     | T down vs N                            | 21.921  | 18.9633   | 13.8415    | 1         |
| cg27235829  | OR10K2                                    | 1.33E-06          | 1.33E-06             | 0.110555           | -9.04523                     | T down vs N                            | 55.831  | 45.4245   | 13.0177    | 1         |
| cg27236490  | MPEG1                                     | 0.00042168        | 0.000421677          | 0.210985           | -4.73967                     | T down vs N                            | 19.61   | 22.6758   | 18.501     | 1         |
| cg27236973  | KRT17                                     | 2.24E-05          | 2.24E-05             | 0.220113           | -4.54312                     | T down vs N                            | 34.819  | 21.4581   | 9.86028    | 1         |
| cg27237541  | MYO3A                                     | 1.32E-05          | 1.32E-05             | 0.157447           | -6.35136                     | T down vs N                            | 38.197  | 32.0096   | 13.4083    | 1         |
| cg27240008  | MBP;MBP;MBP;MBP;MBP;MBP                   | 0.00071023        | 0.000710229          | 4.3208             | 4.3208                       | T up vs N                              | 17.457  | 20.0591   | 18.385     | 1         |
| cg27240158  | TEAD1                                     | 0.00059081        | 0.000590811          | 0.308058           | -3.24614                     | T down vs N                            | 18.201  | 12.9855   | 11.4153    | 1         |
| cg27242911  | MIR1256;CBARA1                            | 0.00022056        | 0.000220561          | 0.266453           | -3.75301                     | T down vs N                            | 22.496  | 16.3829   | 11.6522    | 1         |
| cg27250427  | LOC285768;LOC285768                       | 5.77E-05          | 5.77E-05             | 0.309877           | -3.22709                     | T down vs N                            | 29.274  | 12.856    | 7.02647    | 1         |
| cg27252395  | KAAG1;KAAG1;DCDC2                         | 0.00378461        | 0.00378461           | 5.28984            | 5.28984                      | T up vs N                              | 11.453  | 25.9897   | 36.3096    | 1         |
| cg27254338  | C17orf66                                  | 7.74E-06          | 7.74E-06             | 0.195057           | -5.1267                      | T down vs N                            | 41.853  | 25.0214   | 9.56543    | 1         |
| cg27254852  | LOC100306951;INPP5K;INPP5K;INPP5          | 1.30E-06          | 1.30E-06             | 0.262974           | -3.80265                     | T down vs N                            | 56      | 16.7101   | 4.77429    | 1         |
| cg27257987  | K                                         | 1.57E-05          | 1.57E-05             | 0.135975           | -7.35429                     | T down vs N                            | 37.045  | 37.2882   | 16.1052    | 1         |
| cg27258399  | PSG4;PSG4                                 | 0.00062386        | 0.000623857          | 3.07642            | 3.07642                      | T up vs N                              | 17.979  | 11.8281   | 10.5261    | 1         |
| cg27258551  | HTRA4                                     | 0.00062386        | 0.000623857          | 3.07642            | 3.07642                      | T up vs N                              | 17.979  | 11.8281   | 10.5261    | 1         |
| cg27258551  | SCNN1G                                    | 0.00033772        | 0.000337715          | 0.157345           | -6.35545                     | T down vs N                            | 20.572  | 32.0319   | 24.9127    | 1         |
| cg27261446  | PMFMBP1;PMFMBP1                           | 9.87E-05          | 9.87E-05             | 0.306711           | -3.2604                      | T down vs N                            | 26.424  | 13.0824   | 7.92149    | 1         |
| cg27262054  | ZFH33;ZFH33                               | 0.00011391        | 0.000113913          | 0.163501           | -6.11616                     | T down vs N                            | 25.694  | 30.7162   | 19.1273    | 1         |
| cg27262717  | TNNC2                                     | 0.00012851        | 0.000128505          | 6.34648            | 6.34648                      | T up vs N                              | 25.09   | 31.983    | 20.3953    | 1         |
| cg27263903  | NCSTN;COPA;COPA                           | 1.78E-06          | 1.78E-06             | 0.324699           | -3.07977                     | T down vs N                            | 53.294  | 11.851    | 3.55795    | 1         |
| cg27268574  | FCHO1;FCHO1                               | 0.00031664        | 0.000316638          | 0.264384           | -3.78237                     | T down vs N                            | 20.857  | 16.5766   | 12.7166    | 1         |
| cg27269570  | NUDT15                                    | 0.00033806        | 0.000338063          | 0.313434           | -3.19046                     | T down vs N                            | 20.568  | 12.6067   | 9.807      | 1         |

| Probeset ID | UCSC_REFGENE_NAME              | p-value<br>(Type) | p-value (T vs.<br>N) | Ratio (T<br>vs. N) | Fold-<br>Change (T<br>vs. N) | Fold-Change (T vs.<br>N) (Description) | F(Type) | SS (Type) | SS (Error) | F (Error) |
|-------------|--------------------------------|-------------------|----------------------|--------------------|------------------------------|----------------------------------------|---------|-----------|------------|-----------|
| cg27270214  | FLJ25758                       | 0.00044898        | 0.000448981          | 0.257455           | -3.88417                     | T down vs N                            | 19.344  | 17.245    | 14.2642    | 1         |
| cg27271937  | PLEKHG6;PLEKHG6                | 0.00248532        | 0.00248532           | 9.29697            | 9.29697                      | T up vs N                              | 12.84   | 46.564    | 58.0232    | 1         |
| cg27274542  | NPEPL1                         | 0.00476574        | 0.00476574           | 3.55489            | 3.55489                      | T up vs N                              | 10.724  | 15.0668   | 22.4789    | 1         |
| cg27276457  | FLJ32810                       | 2.88E-08          | 2.88E-08             | 0.307423           | -3.25285                     | T down vs N                            | 99.315  | 13.0311   | 2.09936    | 1         |
|             | ARHGAP25;ARHGAP25;ARHGAP25;AR  |                   |                      |                    |                              |                                        |         |           |            |           |
| cg27278086  | HGAP25                         | 2.13E-07          | 2.13E-07             | 0.116779           | -8.56315                     | T down vs N                            | 74.047  | 43.1932   | 9.33319    | 1         |
| cg27280535  | MFHAS1                         | 0.00104677        | 0.00104677           | 0.23708            | -4.21799                     | T down vs N                            | 15.946  | 19.4044   | 19.47      | 1         |
| cg27284120  | FPR3                           | 5.96E-05          | 5.96E-05             | 0.193861           | -5.15833                     | T down vs N                            | 29.102  | 25.21     | 13.8605    | 1         |
| cg27286993  | CCDC64B                        | 0.00179671        | 0.00179671           | 6.3818             | 6.3818                       | T up vs N                              | 13.965  | 32.1753   | 36.8652    | 1         |
| cg27291231  | ANAPC2;SSNA1                   | 0.00019908        | 0.000199078          | 0.194155           | -5.15053                     | T down vs N                            | 22.975  | 25.1636   | 17.5245    | 1         |
| cg27292389  | IL15RA;IL15RA                  | 0.00050397        | 0.000503969          | 0.109358           | -9.14427                     | T down vs N                            | 18.858  | 45.8748   | 38.9229    | 1         |
| cg27292417  | CHDH                           | 9.14E-05          | 9.14E-05             | 0.171826           | -5.81984                     | T down vs N                            | 26.819  | 29.0546   | 17.3337    | 1         |
| cg27292588  | PTCH2                          | 1.16E-05          | 1.16E-05             | 14.0222            | 14.0222                      | T up vs N                              | 39.065  | 65.3102   | 26.7491    | 1         |
| cg27292694  | SVIL                           | 0.00198411        | 0.00198411           | 0.331928           | -3.0127                      | T down vs N                            | 13.616  | 11.3916   | 13.3865    | 1         |
| cg27294813  | SH3RF3                         | 3.13E-05          | 3.13E-05             | 0.202111           | -4.94777                     | T down vs N                            | 32.786  | 23.9455   | 11.6858    | 1         |
| cg27296341  | IPCEF1;OPRM1;IPCEF1;IPCEF1     | 0.00401226        | 0.00401226           | 0.275916           | -3.62429                     | T down vs N                            | 11.266  | 15.5297   | 22.0557    | 1         |
| cg27297025  | FKRP;FKRP                      | 0.00016918        | 0.000169178          | 4.69164            | 4.69164                      | T up vs N                              | 23.748  | 22.3799   | 15.0786    | 1         |
| cg27297043  | DHX36;DHX36                    | 0.00106475        | 0.00106475           | 0.265561           | -3.76561                     | T down vs N                            | 15.881  | 16.4661   | 16.589     | 1         |
| cg27297105  | FLJ30058                       | 0.00144824        | 0.00144824           | 0.250565           | -3.99098                     | T down vs N                            | 14.739  | 17.9414   | 19.4769    | 1         |
| cg27298057  | PODN                           | 0.00273905        | 0.00273905           | 0.310737           | -3.21815                     | T down vs N                            | 12.512  | 12.7952   | 16.3616    | 1         |
| cg27298639  | SPANXN4                        | 0.00237166        | 0.00237166           | 0.221737           | -4.50986                     | T down vs N                            | 12.999  | 21.2503   | 26.1554    | 1         |
| cg27299406  | HAAO                           | 0.00103659        | 0.00103659           | 6.52182            | 6.52182                      | T up vs N                              | 15.983  | 32.9333   | 32.9679    | 1         |
| cg27300742  | H19                            | 0.00039573        | 0.000395729          | 3.28139            | 3.28139                      | T up vs N                              | 19.883  | 13.2248   | 10.6423    | 1         |
| cg27302507  | PLD4                           | 1.66E-05          | 1.66E-05             | 5.68774            | 5.68774                      | T up vs N                              | 36.698  | 28.302    | 12.3394    | 1         |
| cg27302645  | MAPKBP1;MAPKBP1                | 0.00617622        | 0.00617622           | 3.39027            | 3.39027                      | T up vs N                              | 9.9317  | 13.9614   | 22.4918    | 1         |
|             | PRAME;PRAME;LOC648691;PRAME;P  |                   |                      |                    |                              |                                        |         |           |            |           |
| cg27303185  | RAME;PRAME                     | 3.57E-06          | 3.57E-06             | 0.159841           | -6.25621                     | T down vs N                            | 47.608  | 31.489    | 10.5829    | 1         |
| cg27304332  | SORCS2                         | 0.00101416        | 0.00101416           | 0.272405           | -3.67101                     | T down vs N                            | 16.067  | 15.8402   | 15.7746    | 1         |
| cg27306787  | TXNRD2                         | 0.0008571         | 0.000857099          | 0.251952           | -3.96901                     | T down vs N                            | 16.715  | 17.7986   | 17.037     | 1         |
| cg27308319  | OVOL1                          | 0.00288027        | 0.00288027           | 0.329551           | -3.03443                     | T down vs N                            | 12.637  | 10.8617   | 12.8926    | 1         |
| cg27312241  | MIR507;MIR506                  | 0.0033215         | 0.0033215            | 0.310061           | -3.22518                     | T down vs N                            | 11.875  | 12.843    | 17.3044    | 1         |
| cg27312388  | OPCML                          | 0.00063468        | 0.000634683          | 13.6171            | 13.6171                      | T up vs N                              | 17.909  | 63.868    | 57.059     | 1         |
| cg27312603  | RDH8                           | 0.00055748        | 0.000557484          | 0.298636           | -3.34856                     | T down vs N                            | 18.439  | 13.6797   | 11.8701    | 1         |
| cg27312626  | KCNJ15;KCNJ15                  | 0.00074144        | 0.000741441          | 0.269806           | -3.70637                     | T down vs N                            | 17.286  | 16.0746   | 14.879     | 1         |
| cg27313201  | TPM3                           | 2.13E-05          | 2.13E-05             | 0.195249           | -5.12168                     | T down vs N                            | 35.115  | 24.9914   | 11.3873    | 1         |
| cg27315157  | IFI44L;IFI44L                  | 6.34E-05          | 6.34E-05             | 0.232056           | -4.30931                     | T down vs N                            | 28.767  | 19.9862   | 11.116     | 1         |
| cg27315341  | RMST                           | 9.53E-05          | 9.53E-05             | 0.251423           | -3.97736                     | T down vs N                            | 26.606  | 17.8529   | 10.7363    | 1         |
| cg27315633  | KRTAP10-10;C21orf29            | 0.00065303        | 0.000653029          | 0.302501           | -3.30577                     | T down vs N                            | 17.794  | 13.3901   | 12.0401    | 1         |
| cg27316067  | DLGAP2                         | 9.87E-06          | 9.87E-06             | 0.226136           | -4.42212                     | T down vs N                            | 40.16   | 20.6996   | 8.24685    | 1         |
| cg27316828  | ARL3                           | 0.00132274        | 0.00132274           | 0.300203           | -3.33108                     | T down vs N                            | 15.071  | 13.5614   | 14.3977    | 1         |
| cg27319216  | XKR5                           | 1.24E-05          | 1.24E-05             | 0.123919           | -8.06978                     | T down vs N                            | 38.621  | 40.839    | 16.9188    | 1         |
| cg27319445  | LOC90246                       | 9.67E-07          | 9.67E-07             | 0.129228           | -7.73824                     | T down vs N                            | 58.699  | 39.2145   | 10.6889    | 1         |
| cg27319971  | C4orf44;C4orf44                | 6.40E-05          | 6.40E-05             | 0.22125            | -4.51977                     | T down vs N                            | 28.713  | 21.3123   | 11.8762    | 1         |
| cg27320005  | SLC25A2                        | 0.00026275        | 0.000262754          | 3.79637            | 3.79637                      | T up vs N                              | 21.693  | 16.6688   | 12.2944    | 1         |
| cg27321175  | ITGA8                          | 0.00011427        | 0.00011427           | 0.326337           | -3.06432                     | T down vs N                            | 25.678  | 11.7452   | 7.3184     | 1         |
| cg27321439  | SLC12A5;SLC12A5                | 0.00080052        | 0.00080052           | 0.312633           | -3.19864                     | T down vs N                            | 16.983  | 12.6624   | 11.9297    | 1         |
|             |                                |                   |                      |                    |                              |                                        |         |           |            |           |
| cg27321750  | ARHGAP8;PRR5-ARHGAP8;ARHGAP8   | 0.00374444        | 0.00374444           | 4.80733            | 4.80733                      | T up vs N                              | 11.487  | 23.0908   | 32.1634    | 1         |
|             | RPL13AP5;SNORD33;SNORD35A;SNOR |                   |                      |                    |                              |                                        |         |           |            |           |
| cg27321942  | D34;RPL13A;SNORD32A            | 0.00384472        | 0.00384472           | 0.316072           | -3.16384                     | T down vs N                            | 11.402  | 12.4253   | 17.4359    | 1         |
| cg27322595  | NOTCH4                         | 8.36E-06          | 8.36E-06             | 0.318369           | -3.14101                     | T down vs N                            | 41.317  | 12.2695   | 4.75141    | 1         |
| cg27322701  | MICA                           | 0.00481671        | 0.00481671           | 3.08433            | 3.08433                      | T up vs N                              | 10.691  | 11.8822   | 17.7824    | 1         |
| cg27325224  | CA5A                           | 6.40E-06          | 6.40E-06             | 0.213399           | -4.68606                     | T down vs N                            | 43.216  | 22.3455   | 8.27311    | 1         |
| cg27328673  | PCDHB15                        | 0.00062049        | 0.000620486          | 3.06373            | 3.06373                      | T up vs N                              | 18.001  | 11.7412   | 10.436     | 1         |
| cg27332575  | BMP8A                          | 0.00011343        | 0.000113426          | 0.288213           | -3.46965                     | T down vs N                            | 25.716  | 14.4957   | 9.01907    | 1         |
| cg27334900  | MT1DP;MT1DP                    | 0.00021619        | 0.000216192          | 20.9082            | 20.9082                      | T up vs N                              | 22.589  | 86.5663   | 61.3159    | 1         |
| cg27340283  | PRDM11                         | 6.32E-05          | 6.32E-05             | 0.321091           | -3.11438                     | T down vs N                            | 28.779  | 12.0877   | 6.72019    | 1         |
| cg27341860  | OR2L13                         | 0.00057902        | 0.000579024          | 0.322384           | -3.10189                     | T down vs N                            | 18.283  | 12.0023   | 10.5033    | 1         |
| cg27342333  | POR                            | 3.53E-06          | 3.53E-06             | 0.225277           | -4.43897                     | T down vs N                            | 47.7    | 20.8056   | 6.97876    | 1         |
| cg27342837  | TFPI;TFPI                      | 1.46E-05          | 1.46E-05             | 0.241963           | -4.13287                     | T down vs N                            | 37.513  | 18.8586   | 8.04353    | 1         |
| cg27344587  | LOC100132215                   | 0.00027395        | 0.000273952          | 14.4306            | 14.4306                      | T up vs N                              | 21.504  | 66.7379   | 49.6561    | 1         |
| cg27345534  | PRB1;PRB1;PRB1                 | 4.63E-07          | 4.63E-07             | 0.326871           | -3.05931                     | T down vs N                            | 65.799  | 11.7109   | 2.84768    | 1         |
| cg27346356  | CILP2                          | 0.00356899        | 0.00356899           | 0.318083           | -3.14383                     | T down vs N                            | 11.641  | 12.2887   | 16.8897    | 1         |
| cg27346545  | RAD21L1                        | 7.88E-07          | 7.88E-07             | 0.155315           | -6.43854                     | T down vs N                            | 60.605  | 32.4834   | 8.57578    | 1         |
| cg27349333  | UCN3                           | 5.16E-07          | 5.16E-07             | 0.166393           | -6.00988                     | T down vs N                            | 64.722  | 30.1244   | 7.4471     | 1         |
| cg27351624  | TRIM31                         | 0.00051008        | 0.000510083          | 0.328264           | -3.04633                     | T down vs N                            | 18.807  | 11.622    | 9.88718    | 1         |
| cg27352715  | LRIT2                          | 0.00041548        | 0.000415476          | 0.292175           | -3.42261                     | T down vs N                            | 19.674  | 14.1793   | 11.5316    | 1         |
| cg27353361  | SCML4;SCML4                    | 0.00010911        | 0.000109114          | 0.270937           | -3.69089                     | T down vs N                            | 25.912  | 15.972    | 9.86239    | 1         |
| cg27355501  | PFDN6;WDR46;WDR46              | 3.36E-06          | 3.36E-06             | 0.139065           | -7.19091                     | T down vs N                            | 48.081  | 36.4532   | 12.1305    | 1         |
| cg27358154  | ADAMTS14;ADAMTS14              | 0.00119497        | 0.00119497           | 0.228782           | -4.37098                     | T down vs N                            | 15.447  | 20.3769   | 21.1058    | 1         |
| cg27358936  | LASS3                          | 0.00096065        | 0.000960647          | 0.326394           | -3.06378                     | T down vs N                            | 16.274  | 11.7415   | 11.5439    | 1         |
| cg27360210  | GMFG                           | 1.57E-05          | 1.57E-05             | 0.182516           | -5.47897                     | T down vs N                            | 37.054  | 27.0974   | 11.7007    | 1         |

| Probeset ID                         | UCSC_REFGENE_NAME             | p-value<br>(Type) | p-value (T vs.<br>N) | Ratio (T<br>vs. N) | Fold-<br>Change (T<br>vs. N) | Fold-Change (T vs.<br>N) (Description) | F(Type) | SS (Type) | SS (Error) | F (Error) |
|-------------------------------------|-------------------------------|-------------------|----------------------|--------------------|------------------------------|----------------------------------------|---------|-----------|------------|-----------|
| cg27363141                          | RNF39;RNF39                   | 0.00170737        | 0.00170737           | 3.93021            | 3.93021                      | T up vs N                              | 14.146  | 17.5458   | 19.8458    | 1         |
| cg27365103                          | SIRPB1;SIRPB1;SIRPB1          | 0.00233264        | 0.00233264           | 0.30651            | -3.26254                     | T down vs N                            | 13.056  | 13.0969   | 16.05      | 1         |
| cg27365825                          | KCNS3                         | 0.00048416        | 0.000484155          | 7.48531            | 7.48531                      | T up vs N                              | 19.026  | 37.9511   | 31.9158    | 1         |
| cg27366984                          | NOTCH4                        | 0.00013997        | 0.000139971          | 0.175697           | -5.69162                     | T down vs N                            | 24.668  | 28.3243   | 18.3715    | 1         |
| cg27369452                          | DNMT3A;DNMT3A;DNMT3A          | 9.18E-05          | 9.18E-05             | 0.206852           | -4.83438                     | T down vs N                            | 26.801  | 23.2562   | 13.8839    | 1         |
| cg27371539                          | PANX3                         | 8.69E-05          | 8.69E-05             | 0.234348           | -4.26715                     | T down vs N                            | 27.084  | 19.7181   | 11.6487    | 1         |
| cg27371741                          | LRRC2;TDGF1                   | 4.96E-05          | 4.96E-05             | 3.33007            | 3.33007                      | T up vs N                              | 30.118  | 13.5546   | 7.20083    | 1         |
| cg27374508                          | ITGA9                         | 0.00028958        | 0.00028958           | 0.308445           | -3.24207                     | T down vs N                            | 21.255  | 12.9579   | 9.75442    | 1         |
| cg27379887                          | NSFL1C;NSFL1C;NSFL1C          | 0.00012683        | 0.000126834          | 0.289809           | -3.45055                     | T down vs N                            | 25.156  | 14.3673   | 9.13825    | 1         |
| cg27381822                          | UST                           | 0.00072905        | 0.000729046          | 0.279361           | -3.5796                      | T down vs N                            | 17.353  | 15.2318   | 14.0445    | 1         |
| cg27383362                          | ATAD3C;ATAD3C                 | 1.06E-05          | 1.06E-05             | 0.32816            | -3.04729                     | T down vs N                            | 39.644  | 11.6287   | 4.69326    | 1         |
| cg27384569                          | GABRB3;GABRB3                 | 0.0001582         | 0.000158204          | 0.256111           | -3.90456                     | T down vs N                            | 24.071  | 17.3784   | 11.5515    | 1         |
| cg27387030                          | FMOD                          | 1.26E-05          | 1.26E-05             | 0.17515            | -5.70941                     | T down vs N                            | 38.531  | 28.426    | 11.804     | 1         |
| cg27390009                          | FLII                          | 0.00062885        | 0.000628851          | 3.49695            | 3.49695                      | T up vs N                              | 17.947  | 14.6789   | 13.0867    | 1         |
| cg27390253                          | CNN1                          | 7.57E-05          | 7.57E-05             | 0.263329           | -3.79753                     | T down vs N                            | 27.813  | 16.6764   | 9.59358    | 1         |
| cg27391679                          | OPA3;OPA3                     | 3.04E-05          | 3.04E-05             | 6.81039            | 6.81039                      | T up vs N                              | 32.953  | 34.4716   | 16.7375    | 1         |
| cg27391934                          | VWA1;VWA1                     | 0.00077667        | 0.000776666          | 0.220866           | -4.52763                     | T down vs N                            | 17.102  | 21.3614   | 19.9851    | 1         |
| cg27394794                          | A1CF;A1CF;A1CF                | 0.00029888        | 0.000298875          | 0.237085           | -4.21789                     | T down vs N                            | 21.113  | 19.4037   | 14.7045    | 1         |
| cg27395654                          | CHRNA6                        | 6.02E-05          | 6.02E-05             | 0.106135           | -9.42199                     | T down vs N                            | 29.044  | 47.1236   | 25.9597    | 1         |
| cg27397757                          | GLIS1;GLIS1                   | 0.00031632        | 0.000316317          | 0.227715           | -4.39145                     | T down vs N                            | 20.861  | 20.5062   | 15.7278    | 1         |
| BIN1;BIN1;BIN1;BIN1;BIN1;BIN1;BIN1; |                               |                   |                      |                    |                              |                                        |         |           |            |           |
| cg27405400                          | BIN1;BIN1;BIN1                | 0.00021591        | 0.000215908          | 5.2636             | 5.2636                       | T up vs N                              | 22.595  | 25.8347   | 18.2941    | 1         |
| cg27405731                          | CUX1;CUX1;CUX1                | 0.0048984         | 0.0048984            | 0.286232           | -3.49367                     | T down vs N                            | 10.639  | 14.6569   | 22.0426    | 1         |
| cg27409129                          | GATA3;GATA3                   | 1.13E-06          | 1.13E-06             | 0.133267           | -7.50374                     | T down vs N                            | 57.243  | 38.0439   | 10.6336    | 1         |
| cg27410595                          | TRIM29                        | 1.23E-06          | 1.23E-06             | 0.243345           | -4.10939                     | T down vs N                            | 56.504  | 18.7075   | 5.29735    | 1         |
| cg27410837                          | CASP8;CASP8;CASP8;CASP8;CASP8 | 3.70E-05          | 3.70E-05             | 0.31867            | -3.13804                     | T down vs N                            | 31.785  | 12.2492   | 6.16601    | 1         |
| cg27412902                          | IL29                          | 4.01E-05          | 4.01E-05             | 0.172228           | -5.80625                     | T down vs N                            | 31.323  | 28.9775   | 14.802     | 1         |
| cg27413563                          | PON3                          | 0.00306923        | 0.00306923           | 3.64199            | 3.64199                      | T up vs N                              | 12.134  | 15.6475   | 20.6326    | 1         |
| cg27413732                          | CORO6                         | 0.00039184        | 0.000391837          | 7.52326            | 7.52326                      | T up vs N                              | 19.925  | 38.142    | 30.628     | 1         |
| cg27418402                          | PSMD6                         | 4.86E-05          | 4.86E-05             | 0.177023           | -5.649                       | T down vs N                            | 30.234  | 28.0799   | 14.8602    | 1         |
| cg27423177                          | C3AR1                         | 3.82E-05          | 3.82E-05             | 0.273284           | -3.6592                      | T down vs N                            | 31.602  | 15.7618   | 7.98014    | 1         |
| cg27423357                          | FLT1;FLT1;FLT1                | 0.00264687        | 0.00264687           | 0.28153            | -3.55202                     | T down vs N                            | 12.627  | 15.0477   | 19.0668    | 1         |
| cg27423445                          | APOLD1                        | 4.08E-08          | 4.08E-08             | 0.217319           | -4.60154                     | T down vs N                            | 94.464  | 21.8219   | 3.69612    | 1         |
| cg27425327                          | DRAM1                         | 1.43E-07          | 1.43E-07             | 0.258526           | -3.86808                     | T down vs N                            | 78.57   | 17.1396   | 3.49031    | 1         |
| cg27425612                          | LAD1                          | 1.77E-05          | 1.77E-05             | 15.3965            | 15.3965                      | T up vs N                              | 36.29   | 70.017    | 30.8701    | 1         |
| cg27426220                          | EPHA1                         | 0.0004008         | 0.000400796          | 9.15456            | 9.15456                      | T up vs N                              | 19.828  | 45.9214   | 37.0558    | 1         |
| LOC100302652;ERLEC1;ERLEC1;ERLEC    |                               |                   |                      |                    |                              |                                        |         |           |            |           |
| cg27427369                          | 1                             | 0.00037503        | 0.000375032          | 0.262217           | -3.81364                     | T down vs N                            | 20.115  | 16.7824   | 13.3492    | 1         |
| cg27428104                          | TNXB                          | 3.02E-06          | 3.02E-06             | 0.28507            | -3.50791                     | T down vs N                            | 48.939  | 14.7524   | 4.82307    | 1         |
| cg27431234                          | INTU;INTU                     | 3.53E-05          | 3.53E-05             | 0.3325             | -3.00752                     | T down vs N                            | 32.072  | 11.356    | 5.66536    | 1         |
| cg27433088                          | GALNT7                        | 0.00085134        | 0.000851341          | 0.315513           | -3.16945                     | T down vs N                            | 16.742  | 12.4635   | 11.9114    | 1         |
| cg27434368                          | CILP2                         | 0.00062761        | 0.000627613          | 3.36023            | 3.36023                      | T up vs N                              | 17.955  | 13.7586   | 12.2607    | 1         |
| cg27435903                          | GSDMB;GSDMB;GSDMB;GSDMB       | 2.41E-06          | 2.41E-06             | 0.270614           | -3.69531                     | T down vs N                            | 50.753  | 16.0013   | 5.04444    | 1         |
| cg27437510                          | AGAP3;AGAP3                   | 0.0003367         | 0.000336704          | 4.71321            | 4.71321                      | T up vs N                              | 20.585  | 22.5129   | 17.4982    | 1         |
| cg27441138                          | WNT3A                         | 0.00532066        | 0.00532066           | 0.275592           | -3.62855                     | T down vs N                            | 10.384  | 15.558    | 23.972     | 1         |
| cg27441409                          | S100A7L2                      | 0.00074692        | 0.000746922          | 0.177649           | -5.62909                     | T down vs N                            | 17.256  | 27.9655   | 25.9294    | 1         |
| cg27443373                          | CENPE                         | 2.97E-05          | 2.97E-05             | 0.197647           | -5.05953                     | T down vs N                            | 33.084  | 24.6192   | 11.9063    | 1         |
| cg27444644                          | ORH2                          | 2.45E-09          | 2.45E-09             | 0.256812           | -3.8939                      | T down vs N                            | 140.6   | 17.3086   | 1.96963    | 1         |
| cg27444940                          | FARP1                         | 0.00081718        | 0.000817178          | 0.310756           | -3.21796                     | T down vs N                            | 16.902  | 12.7939   | 12.1113    | 1         |
| cg27447753                          | TANK;TANK                     | 3.69E-06          | 3.69E-06             | 0.222382           | -4.49677                     | T down vs N                            | 47.366  | 21.1683   | 7.15058    | 1         |
| cg27449131                          | IER3                          | 0.00688673        | 0.00688673           | 14.3771            | 14.3771                      | T up vs N                              | 9.7949  | 62.6375   | 95.9241    | 1         |
| A2BP1;A2BP1;A2BP1;A2BP1;A2BP1;A2    |                               |                   |                      |                    |                              |                                        |         |           |            |           |
| cg27449328                          | BP1                           | 0.00034757        | 0.000347574          | 0.309657           | -3.22938                     | T down vs N                            | 20.446  | 12.8716   | 10.0726    | 1         |
| cg27449489                          | TEX19                         | 2.18E-06          | 2.18E-06             | 0.28503            | -3.50841                     | T down vs N                            | 51.591  | 14.7557   | 4.57622    | 1         |
| cg27454316                          | STX18                         | 0.00016092        | 0.00016092           | 0.326144           | -3.06613                     | T down vs N                            | 23.988  | 11.7576   | 7.8422     | 1         |
| cg27455017                          | RARRES2                       | 0.00070017        | 0.000700165          | 3.41052            | 3.41052                      | T up vs N                              | 17.514  | 14.0979   | 12.8792    | 1         |
| cg27458265                          | LPCAT2;LPCAT2                 | 0.00019445        | 0.00019445           | 10.1047            | 10.1047                      | T up vs N                              | 23.085  | 50.1086   | 34.7294    | 1         |
| cg27458485                          | ANKS1B;ANKS1B;ANKS1B          | 0.00016878        | 0.000168775          | 7.86815            | 7.86815                      | T up vs N                              | 23.759  | 39.8552   | 26.8398    | 1         |
| cg27459353                          | ATP2C2                        | 3.40E-05          | 3.40E-05             | 5.69699            | 5.69699                      | T up vs N                              | 32.296  | 28.355    | 14.0477    | 1         |
| cg27459981                          | MLKL;MLKL;MLKL;MLKL           | 1.12E-05          | 1.12E-05             | 0.268661           | -3.72217                     | T down vs N                            | 39.324  | 16.1791   | 6.58292    | 1         |
| cg27460526                          | CBLN4                         | 2.43E-06          | 2.43E-06             | 0.212294           | -4.71045                     | T down vs N                            | 50.695  | 22.4959   | 7.09998    | 1         |
| cg27466845                          | NRXN2;NRXN2;NRXN2             | 5.58E-05          | 5.58E-05             | 6.52463            | 6.52463                      | T up vs N                              | 29.463  | 32.9484   | 17.8928    | 1         |
| cg27467383                          | LGALS1                        | 5.48E-05          | 5.48E-05             | 0.290529           | -3.442                       | T down vs N                            | 29.559  | 14.3099   | 7.74586    | 1         |
| cg27469946                          | ITGB1BP3                      | 2.20E-05          | 2.20E-05             | 0.305038           | -3.27828                     | T down vs N                            | 34.928  | 13.2038   | 6.04849    | 1         |
| cg27473997                          | USP17                         | 5.51E-06          | 5.51E-06             | 0.298693           | -3.34792                     | T down vs N                            | 44.312  | 13.6754   | 4.93782    | 1         |
| cg27475923                          | C11orf95                      | 7.81E-06          | 7.81E-06             | 8.6213             | 8.6213                       | T up vs N                              | 41.79   | 43.4659   | 16.6418    | 1         |
| cg27478313                          | GMD5                          | 0.00054277        | 0.00054277           | 5.48561            | 5.48561                      | T up vs N                              | 18.55   | 27.136    | 23.4062    | 1         |
| cg27480553                          | C22orf27                      | 7.02E-06          | 7.02E-06             | 0.241753           | -4.13645                     | T down vs N                            | 42.549  | 18.8816   | 7.10021    | 1         |
| cg27480913                          | ORS2L1                        | 7.82E-06          | 7.82E-06             | 0.172182           | -5.80782                     | T down vs N                            | 41.782  | 28.9864   | 11.1002    | 1         |
| cg27484662                          | ATP9B                         | 0.00415999        | 0.00415999           | 0.199038           | -5.02418                     | T down vs N                            | 11.151  | 24.4067   | 35.02      | 1         |
| cg27485269                          | ADAM18                        | 4.56E-06          | 4.56E-06             | 0.297499           | -3.36136                     | T down vs N                            | 45.727  | 13.7662   | 4.81681    | 1         |
| cg27486714                          | HS3ST1                        | 0.00223917        | 0.00223917           | 0.258235           | -3.87244                     | T down vs N                            | 13.196  | 17.1682   | 20.8157    | 1         |

| Probeset ID | UCSC_REFGENE_NAME                | p-value<br>(Type) | p-value (T vs.<br>N) | Ratio (T<br>vs. N) | Fold-<br>Change (T<br>vs. N) | Fold-Change (T vs.<br>N) (Description) | F(Type) | SS (Type) | SS (Error) | F (Error) |
|-------------|----------------------------------|-------------------|----------------------|--------------------|------------------------------|----------------------------------------|---------|-----------|------------|-----------|
| cg27486812  | RFX2;RFX2                        | 0.00091286        | 0.000912862          | 0.236724           | -4.22433                     | T down vs N                            | 16.471  | 19.4449   | 18.8893    | 1         |
| cg27496267  | FZD1                             | 5.34E-06          | 5.34E-06             | 3.45828            | 3.45828                      | T up vs N                              | 44.545  | 14.4194   | 5.17923    | 1         |
| cg27496615  | HOBX4                            | 0.00341997        | 0.00341997           | 3.05195            | 3.05195                      | T up vs N                              | 11.78   | 11.6606   | 15.8382    | 1         |
| cg27498387  | ANK1;ANK1;ANK1;ANK1;ANK1         | 4.11E-05          | 4.11E-05             | 5.0061             | 5.0061                       | T up vs N                              | 31.185  | 24.2978   | 12.4663    | 1         |
| cg27499850  | HTA                              | 0.00041229        | 0.00041229           | 0.224218           | -4.45995                     | T down vs N                            | 19.707  | 20.9374   | 16.9993    | 1         |
| cg27501293  | SFTPD                            | 0.00112504        | 0.00112504           | 0.325801           | -3.06936                     | T down vs N                            | 15.674  | 11.7797   | 12.0251    | 1         |
| cg27501645  | ITPKA                            | 0.00019605        | 0.000196046          | 4.13165            | 4.13165                      | T up vs N                              | 23.047  | 18.8507   | 13.087     | 1         |
| cg27501759  | OXTR                             | 4.72E-05          | 4.72E-05             | 15.0038            | 15.0038                      | T up vs N                              | 30.395  | 68.6999   | 36.1635    | 1         |
| cg27502296  | DUSP9                            | 0.00010549        | 0.000105486          | 5.51805            | 5.51805                      | T up vs N                              | 26.084  | 27.3243   | 16.761     | 1         |
| cg27502912  | CPT1B;CPT1B;CPT1B;CPT1B;CHKB-    | 3.46E-05          | 3.46E-05             | 3.17319            | 3.17319                      | T up vs N                              | 32.177  | 12.489    | 6.21011    | 1         |
|             | CPT1B;CPT1B;CPT1B;CPT1B;CPT1B;CP |                   |                      |                    |                              |                                        |         |           |            |           |
| cg27504195  | SIDT1                            | 0.00012085        | 0.000120846          | 4.51023            | 4.51023                      | T up vs N                              | 25.397  | 21.2526   | 13.389     | 1         |
| cg27505349  | TUBB                             | 3.78E-09          | 3.78E-09             | 0.221969           | -4.50513                     | T down vs N                            | 132.38  | 21.2207   | 2.5649     | 1         |
| cg27505472  | RALB                             | 4.46E-05          | 4.46E-05             | 6.1492             | 6.1492                       | T up vs N                              | 30.72   | 30.8992   | 16.0933    | 1         |
| cg27507295  | RHCG;RHCG                        | 1.68E-05          | 1.68E-05             | 4.84023            | 4.84023                      | T up vs N                              | 36.639  | 23.2919   | 10.1713    | 1         |
| cg27509381  | C1QBP                            | 3.55E-05          | 3.55E-05             | 0.24409            | -4.09684                     | T down vs N                            | 32.042  | 18.6266   | 9.30107    | 1         |
| cg27511181  | RPTOR;RPTOR                      | 4.01E-05          | 4.01E-05             | 0.280992           | -3.55882                     | T down vs N                            | 31.323  | 15.0931   | 7.70963    | 1         |
| cg27513886  | ZNF668                           | 0.00037883        | 0.000378831          | 0.30872            | -3.23918                     | T down vs N                            | 20.071  | 12.9382   | 10.3139    | 1         |
| cg27514874  | ACSM5                            | 4.09E-06          | 4.09E-06             | 0.239491           | -4.17552                     | T down vs N                            | 46.57   | 19.1325   | 6.5733     | 1         |
| cg27516568  | TMEM155;LOC100192379             | 3.99E-07          | 3.99E-07             | 5.89001            | 5.89001                      | T up vs N                              | 67.306  | 29.4513   | 7.00122    | 1         |
| cg27518240  | LOC400804                        | 2.74E-06          | 2.74E-06             | 0.2675             | -3.73831                     | T down vs N                            | 49.731  | 16.2858   | 5.23966    | 1         |
| cg27518976  | ID3                              | 3.49E-05          | 3.49E-05             | 0.226429           | -4.4164                      | T down vs N                            | 32.132  | 20.6635   | 10.2895    | 1         |
| cg27518993  | DUSP7                            | 0.00084664        | 0.00084664           | 4.01663            | 4.01663                      | T up vs N                              | 16.763  | 18.1079   | 17.2835    | 1         |
| cg27519330  | SYT15;SYT15                      | 0.00701481        | 0.00701481           | 6.27991            | 6.27991                      | T up vs N                              | 9.5526  | 31.619    | 52.9599    | 1         |
| cg27524080  | VIPR2                            | 0.00031851        | 0.000318508          | 3.6931             | 3.6931                       | T up vs N                              | 20.831  | 15.9867   | 12.2795    | 1         |
| cg27524361  | TSGA10;TSGA10                    | 0.00010165        | 0.000101649          | 0.19281            | -5.18645                     | T down vs N                            | 26.273  | 25.3774   | 15.4546    | 1         |
| cg27526549  | CST7                             | 0.00551687        | 0.00551687           | 0.332746           | -3.0053                      | T down vs N                            | 10.273  | 11.3408   | 17.6624    | 1         |
| cg27527345  | OR10J5                           | 4.86E-07          | 4.86E-07             | 0.164694           | -6.07186                     | T down vs N                            | 65.318  | 30.47     | 7.46375    | 1         |
| cg27527630  | WIPF3                            | 0.00083559        | 0.000835588          | 3.38851            | 3.38851                      | T up vs N                              | 16.815  | 13.9495   | 13.2738    | 1         |
| cg27528032  | C15orf60                         | 2.72E-05          | 2.72E-05             | 0.218935           | -4.56757                     | T down vs N                            | 35.258  | 20.3394   | 8.65318    | 1         |
| cg27531490  | TNF                              | 4.61E-05          | 4.61E-05             | 0.325033           | -3.07662                     | T down vs N                            | 30.533  | 11.8294   | 6.1988     | 1         |
| cg27533119  | GPR37                            | 0.00541827        | 0.00541827           | 6.24894            | 6.24894                      | T up vs N                              | 10.329  | 31.4491   | 48.7182    | 1         |
| cg27533472  | MS4A2;MS4A2;MS4A2;MS4A2          | 2.04E-05          | 2.04E-05             | 0.117329           | -8.52306                     | T down vs N                            | 35.396  | 43.0046   | 19.4391    | 1         |
| cg27533482  | AZI2;AZI2;AZI2                   | 5.73E-05          | 5.73E-05             | 3.39588            | 3.39588                      | T up vs N                              | 29.314  | 13.9992   | 7.64098    | 1         |
| cg27534599  | CECR1;CECR1;CECR1                | 0.0005626         | 0.000562597          | 5.07585            | 5.07585                      | T up vs N                              | 18.402  | 24.7171   | 21.4913    | 1         |
| cg27534912  | CD1C                             | 6.57E-06          | 6.57E-06             | 0.127889           | -7.81927                     | T down vs N                            | 43.026  | 39.6148   | 14.7315    | 1         |
| cg27535410  | PRTN3                            | 1.03E-07          | 1.03E-07             | 0.037921           | -26.3709                     | T down vs N                            | 82.518  | 100.29    | 19.4459    | 1         |
| cg27539833  | TGIF2LY                          | 1.71E-06          | 1.71E-06             | 0.151531           | -6.59929                     | T down vs N                            | 53.647  | 33.3494   | 9.94627    | 1         |
| cg27541454  | AGRN                             | 0.00175882        | 0.00175882           | 3.60609            | 3.60609                      | T up vs N                              | 14.04   | 15.4085   | 17.5594    | 1         |
| cg27545072  | DACH2;DACH2;DACH2                | 0.00109655        | 0.00109655           | 0.299417           | -3.33982                     | T down vs N                            | 15.77   | 13.6206   | 13.8191    | 1         |
| cg27545367  | IER3;FLOT1                       | 0.00037534        | 0.000375343          | 3.10627            | 3.10627                      | T up vs N                              | 20.111  | 12.0322   | 9.57253    | 1         |
| cg27549720  | HTR6;HTR6                        | 0.00065178        | 0.000651782          | 7.34457            | 7.34457                      | T up vs N                              | 17.802  | 37.2387   | 33.4697    | 1         |
| cg27551227  | HTR5A                            | 7.45E-06          | 7.45E-06             | 0.194117           | -5.15152                     | T down vs N                            | 42.126  | 25.1695   | 9.55967    | 1         |
| cg27553457  | PPP1R13L;PPP1R13L                | 0.00043795        | 0.000437951          | 4.3298             | 4.3298                       | T up vs N                              | 19.449  | 20.1162   | 16.5488    | 1         |
| cg27553955  | KCNG3;KCNG3                      | 1.12E-05          | 1.12E-05             | 9.53364            | 9.53364                      | T up vs N                              | 39.314  | 47.6198   | 19.3802    | 1         |
| cg27554782  | CHRN4                            | 0.00064656        | 0.000646559          | 4.32945            | 4.32945                      | T up vs N                              | 17.834  | 20.114    | 18.0452    | 1         |
| cg27557134  | C1orf94;C1orf94                  | 0.00031724        | 0.000317241          | 3.72593            | 3.72593                      | T up vs N                              | 20.848  | 16.204    | 12.4358    | 1         |
| cg27557378  | DNASE1L2                         | 3.93E-06          | 3.93E-06             | 10.4084            | 10.4084                      | T up vs N                              | 46.877  | 51.4001   | 17.544     | 1         |
| cg27558697  | C16orf11                         | 0.00097732        | 0.00097732           | 0.273157           | -3.66089                     | T down vs N                            | 16.208  | 15.773    | 15.5706    | 1         |
| cg27560555  | CNO                              | 0.00064493        | 0.000644928          | 0.250767           | -3.98777                     | T down vs N                            | 17.845  | 17.9206   | 16.0682    | 1         |
| cg27561222  | MCOLN2                           | 6.81E-05          | 6.81E-05             | 0.2431             | -4.11353                     | T down vs N                            | 28.375  | 18.7341   | 10.5636    | 1         |
| cg27564766  | TP73;TP73;TP73;TP73              | 0.00449478        | 0.00449478           | 0.262757           | -3.80579                     | T down vs N                            | 10.907  | 16.7307   | 24.543     | 1         |
| cg27565450  | CDX4                             | 0.00610888        | 0.00610888           | 3.5638             | 3.5638                       | T up vs N                              | 9.9647  | 15.1264   | 24.288     | 1         |
| cg27565645  | BAX;BAX;BAX;BAX;BAX              | 0.00014194        | 0.000141937          | 3.42065            | 3.42065                      | T up vs N                              | 24.6    | 14.1661   | 9.21394    | 1         |
| cg27567593  | BMP8A                            | 0.00142706        | 0.00142706           | 3.69456            | 3.69456                      | T up vs N                              | 14.792  | 15.9963   | 17.3023    | 1         |
| cg27568504  | TCERG1L                          | 0.00480936        | 0.00480936           | 0.315922           | -3.16533                     | T down vs N                            | 10.696  | 12.4355   | 18.6022    | 1         |
| cg27569034  | SPRR1A                           | 0.0007604         | 0.000760401          | 0.316618           | -3.15838                     | T down vs N                            | 17.186  | 12.3881   | 11.5335    | 1         |
| cg27569446  | RASSF1;RASSF1                    | 5.63E-05          | 5.63E-05             | 7.61708            | 7.61708                      | T up vs N                              | 29.413  | 38.6119   | 21.004     | 1         |
| cg27571196  | PKP1;PKP1                        | 0.00011656        | 0.000116562          | 3.35169            | 3.35169                      | T up vs N                              | 25.578  | 13.7009   | 8.57034    | 1         |
| cg27573991  | C1orf150                         | 0.00194342        | 0.00194342           | 0.235034           | -4.2547                      | T down vs N                            | 13.688  | 19.6387   | 22.9557    | 1         |
| cg27576615  | POLG;POLG                        | 9.29E-06          | 9.29E-06             | 0.168575           | -5.93209                     | T down vs N                            | 40.58   | 29.6883   | 11.7055    | 1         |
| cg27578439  | FAM18B                           | 4.75E-05          | 4.75E-05             | 0.181757           | -5.50186                     | T down vs N                            | 30.358  | 27.2304   | 14.3516    | 1         |
| cg27579097  | JMJD8;WDR24                      | 0.00182421        | 0.00182421           | 0.328637           | -3.04287                     | T down vs N                            | 13.911  | 11.5984   | 13.3403    | 1         |
| cg27579121  | USP49                            | 9.41E-05          | 9.41E-05             | 0.244282           | -4.09363                     | T down vs N                            | 26.671  | 18.6059   | 11.1619    | 1         |
| cg27579233  | ZBTB40;ZBTB40                    | 0.00717058        | 0.00717058           | 0.29477            | -3.39248                     | T down vs N                            | 9.4879  | 13.9763   | 23.5692    | 1         |
| cg27579313  | ZBTB4;ZBTB4                      | 0.00039044        | 0.000390442          | 4.31942            | 4.31942                      | T up vs N                              | 23.636  | 15.2765   | 7.7559     | 1         |
| cg27579771  | ARHGAP26;ARHGAP26                | 0.00051306        | 0.000513056          | 0.29371            | -3.40471                     | T down vs N                            | 18.783  | 14.0588   | 11.9756    | 1         |
| cg27581047  | SLC35B4                          | 4.65E-05          | 4.65E-05             | 0.315971           | -3.16484                     | T down vs N                            | 30.477  | 12.4321   | 6.52663    | 1         |
| cg27581212  | OR7G1                            | 0.00054566        | 0.000545655          | 0.220481           | -4.53554                     | T down vs N                            | 19.123  | 20.1513   | 15.8066    | 1         |
| cg27582235  | MYO1F;MYO1F                      | 2.04E-08          | 2.04E-08             | 0.257569           | -3.88245                     | T down vs N                            | 104.37  | 17.2338   | 2.64186    | 1         |
| cg27583220  | CLDN9;CLDN9                      | 0.00180395        | 0.00180395           | 0.317045           | -3.15413                     | T down vs N                            | 13.95   | 12.359    | 14.1749    | 1         |

| Probeset ID                                                                              | UCSC_REFGENE_NAME             | p-value<br>(Type) | p-value (T vs.<br>N) | Ratio (T<br>vs. N) | Fold-<br>Change (T<br>vs. N) | Fold-Change (T vs.<br>N) (Description) | F(Type) | SS (Type) | SS (Error) | F (Error) |
|------------------------------------------------------------------------------------------|-------------------------------|-------------------|----------------------|--------------------|------------------------------|----------------------------------------|---------|-----------|------------|-----------|
| cg27585287                                                                               | CDC42EP1                      | 0.00022302        | 0.000223015          | 3.13472            | 3.13472                      | T up vs N                              | 22.445  | 12.2266   | 8.71589    | 1         |
| cg27594095                                                                               | PSORS1C1                      | 0.00203585        | 0.00203585           | 0.223944           | -4.4654                      | T down vs N                            | 13.526  | 20.9717   | 24.8079    | 1         |
| cg27596890                                                                               | ZNF423                        | 6.11E-06          | 6.11E-06             | 0.23721            | -4.21568                     | T down vs N                            | 43.551  | 19.3896   | 7.12344    | 1         |
| cg27598632                                                                               | DEFB106B;DEFB106A             | 6.87E-05          | 6.87E-05             | 0.168144           | -5.94727                     | T down vs N                            | 28.329  | 29.7736   | 16.8161    | 1         |
| cg27599015                                                                               | NFATC2                        | 0.00306757        | 0.00306757           | 0.323588           | -3.09035                     | T down vs N                            | 12.136  | 11.9234   | 15.7198    | 1         |
| PCDHGA4;PCDHGA6;PCDHGA9;PCDHGA10;PCDHGA8;PCDHGA5;PCDHGB1;PCDHGA10;PCDHGB4;PCDHGA3;PCDHGA |                               |                   |                      |                    |                              |                                        |         |           |            |           |
| cg27599792                                                                               | DHGA10;PCDHGB4;PCDHGA3;PCDHGA | 0.00019715        | 0.00019715           | 4.27099            | 4.27099                      | T up vs N                              | 23.02   | 19.7425   | 13.7218    | 1         |
| cg27602263                                                                               | RAX                           | 4.46E-05          | 4.46E-05             | 0.080977           | -12.3491                     | T down vs N                            | 30.724  | 59.1764   | 30.8171    | 1         |
| cg27604402                                                                               | LSM2                          | 0.00023872        | 0.000238723          | 0.262214           | -3.81368                     | T down vs N                            | 22.131  | 16.7826   | 12.1334    | 1         |
| cg27605208                                                                               | MYNN                          | 4.06E-05          | 4.06E-05             | 0.248062           | -4.03125                     | T down vs N                            | 31.26   | 18.2026   | 9.31685    | 1         |
| cg27605228                                                                               | GPR160                        | 0.00047741        | 0.000477408          | 0.286192           | -3.49415                     | T down vs N                            | 19.085  | 14.6602   | 12.2908    | 1         |
| cg27606804                                                                               | BCYRN1;GJB1;GJB1              | 0.00329246        | 0.00329246           | 0.305855           | -3.26952                     | T down vs N                            | 11.904  | 13.1443   | 17.6676    | 1         |
| cg27607805                                                                               | NAALADL1                      | 8.91E-06          | 8.91E-06             | 0.287904           | -3.47338                     | T down vs N                            | 40.868  | 14.5208   | 5.68501    | 1         |
| cg27610605                                                                               | MLL3                          | 0.00029807        | 0.000298073          | 3.50089            | 3.50089                      | T up vs N                              | 21.125  | 14.7053   | 11.1376    | 1         |
| cg27613172                                                                               | HOXC8                         | 3.82E-06          | 3.82E-06             | 0.154398           | -6.47677                     | T down vs N                            | 47.088  | 32.6903   | 11.1077    | 1         |
| cg27613998                                                                               | CDC42EP3                      | 0.00047643        | 0.000476432          | 0.286847           | -3.48618                     | T down vs N                            | 19.093  | 14.6067   | 12.2404    | 1         |
| cg27615095                                                                               | PPM1H                         | 0.00074519        | 0.000745186          | 0.322121           | -3.10443                     | T down vs N                            | 17.266  | 12.0196   | 11.1385    | 1         |
| cg27615366                                                                               | PDLIM4;PDLIM4                 | 0.0009346         | 0.000934602          | 3.94604            | 3.94604                      | T up vs N                              | 16.38   | 17.6491   | 17.2399    | 1         |
| cg27615578                                                                               | LRRRC8E                       | 0.00043157        | 0.000431571          | 5.12767            | 5.12767                      | T up vs N                              | 19.512  | 25.0272   | 20.523     | 1         |
| cg27616541                                                                               | CNTNAP1                       | 4.15E-05          | 4.15E-05             | 4.82274            | 4.82274                      | T up vs N                              | 31.131  | 23.185    | 11.9161    | 1         |
| cg27617780                                                                               | FMNL2                         | 0.0004424         | 0.0004424            | 0.290983           | -3.43663                     | T down vs N                            | 19.406  | 14.2737   | 11.7684    | 1         |
| cg27618777                                                                               | TAP2;TAP2                     | 0.00126477        | 0.00126477           | 0.324848           | -3.07837                     | T down vs N                            | 15.236  | 11.8414   | 12.4349    | 1         |
| cg27618792                                                                               | RPS12;SNORA33                 | 3.48E-05          | 3.48E-05             | 0.245875           | -4.0671                      | T down vs N                            | 32.153  | 18.4346   | 9.1734     | 1         |
| cg27619475                                                                               | SLC16A5                       | 0.00015839        | 0.00015839           | 3.47426            | 3.47426                      | T up vs N                              | 24.065  | 14.5267   | 9.65828    | 1         |
| cg27619840                                                                               | HCN1                          | 4.33E-05          | 4.33E-05             | 0.256514           | -3.89843                     | T down vs N                            | 30.886  | 17.3383   | 8.98196    | 1         |
| cg27621997                                                                               | CCDC86                        | 4.43E-05          | 4.43E-05             | 0.319656           | -3.12836                     | T down vs N                            | 30.751  | 12.1832   | 6.33905    | 1         |
| A2BP1;A2BP1;A2BP1;A2BP1;A2BP1;A2BP1;A2BP1;A2BP1;A2BP1                                    |                               |                   |                      |                    |                              |                                        |         |           |            |           |
| cg27623406                                                                               | BP1;A2BP1;A2BP1;A2BP1         | 0.00019836        | 0.000198359          | 0.284753           | -3.51182                     | T down vs N                            | 22.992  | 14.7786   | 10.2846    | 1         |
| cg27624319                                                                               | MAP1LC3A;MAP1LC3A             | 0.00020282        | 0.000202815          | 3.12165            | 3.12165                      | T up vs N                              | 23.745  | 11.4233   | 7.21639    | 1         |
| cg27624424                                                                               | SOD2;SOD2;SOD2                | 0.00126905        | 0.00126905           | 0.225288           | -4.43876                     | T down vs N                            | 15.224  | 20.8043   | 21.865     | 1         |
| LGALS9;LGALS9;LGALS9;LGALS9;LGALS9                                                       |                               |                   |                      |                    |                              |                                        |         |           |            |           |
| cg27625456                                                                               | 9                             | 0.00010994        | 0.000109935          | 0.28469            | -3.5126                      | T down vs N                            | 25.874  | 14.7838   | 9.14209    | 1         |
| cg27625491                                                                               | CD36;CD36;CD36                | 0.00084398        | 0.000843982          | 0.192875           | -5.18472                     | T down vs N                            | 16.776  | 25.3671   | 24.1945    | 1         |
| cg27629986                                                                               | TTL4                          | 1.05E-06          | 1.05E-06             | 0.263786           | -3.79096                     | T down vs N                            | 57.911  | 16.6331   | 4.59551    | 1         |
| cg27631256                                                                               | TNFSF8;TNFSF8                 | 8.09E-07          | 8.09E-07             | 0.264415           | -3.78194                     | T down vs N                            | 60.355  | 16.5737   | 4.39363    | 1         |
| cg27631593                                                                               | SPRR2E                        | 2.18E-05          | 2.18E-05             | 0.212634           | -4.70291                     | T down vs N                            | 34.967  | 22.4494   | 10.2724    | 1         |
| cg27633342                                                                               | MYO5C                         | 0.00714305        | 0.00714305           | 0.304581           | -3.2832                      | T down vs N                            | 9.4992  | 13.2371   | 22.296     | 1         |
| cg27634724                                                                               | KCNS1                         | 0.00098546        | 0.000985455          | 3.66309            | 3.66309                      | T up vs N                              | 16.176  | 15.7876   | 15.6156    | 1         |
| cg27635485                                                                               | VEGFC                         | 0.00018277        | 0.000182769          | 0.286585           | -3.48937                     | T down vs N                            | 23.379  | 14.6281   | 10.0113    | 1         |
| cg27636559                                                                               | EFTUD1;EFTUD1                 | 0.00029434        | 0.000294342          | 0.333246           | -3.00079                     | T down vs N                            | 21.182  | 11.3099   | 8.5432     | 1         |
| cg27637326                                                                               | NLRP9                         | 7.82E-06          | 7.82E-06             | 0.164149           | -6.09204                     | T down vs N                            | 41.785  | 30.5822   | 11.7104    | 1         |
| cg27637597                                                                               | SLC29A4;SLC29A4               | 0.00359306        | 0.00359306           | 0.28772            | -3.47561                     | T down vs N                            | 11.62   | 14.5357   | 20.0153    | 1         |
| cg27638453                                                                               | ARID1B;ARID1B;ARID1B          | 1.12E-05          | 1.12E-05             | 0.209723           | -4.76819                     | T down vs N                            | 39.311  | 22.851    | 9.30064    | 1         |
| cg27638742                                                                               | ZSCAN10                       | 0.00034227        | 0.000342274          | 0.323337           | -3.09275                     | T down vs N                            | 20.513  | 11.9398   | 9.31279    | 1         |
| cg27639662                                                                               | PRDM8                         | 6.37E-06          | 6.37E-06             | 7.68778            | 7.68778                      | T up vs N                              | 43.258  | 38.9642   | 14.4118    | 1         |
| cg27640254                                                                               | DHRS9                         | 0.00013216        | 0.00013216           | 0.16825            | -5.94353                     | T down vs N                            | 24.951  | 29.7526   | 19.0788    | 1         |
| cg27641239                                                                               | CST7                          | 0.00623024        | 0.00623024           | 0.323871           | -3.08765                     | T down vs N                            | 9.9056  | 11.9049   | 19.2294    | 1         |
| cg27642618                                                                               | CD33;CD33                     | 2.46E-05          | 2.46E-05             | 0.306209           | -3.26575                     | T down vs N                            | 34.238  | 13.1187   | 6.13056    | 1         |
| cg27644247                                                                               | RELB                          | 0.0067078         | 0.0067078            | 0.274113           | -3.64813                     | T down vs N                            | 9.6851  | 15.6883   | 25.9173    | 1         |
| cg27649239                                                                               | LBXCOR1                       | 0.00012278        | 0.000122777          | 16.6056            | 16.6056                      | T up vs N                              | 25.318  | 73.9424   | 46.7293    | 1         |
| cg27652350                                                                               | ALDH1A3                       | 0.00069758        | 0.000697581          | 7.34449            | 7.34449                      | T up vs N                              | 17.529  | 37.2383   | 33.9906    | 1         |
| cg27656658                                                                               | HOXB3                         | 6.40E-05          | 6.40E-05             | 28.1535            | 28.1535                      | T up vs N                              | 29.979  | 98.202    | 49.1359    | 1         |
| cg27658254                                                                               | DENND3                        | 1.38E-05          | 1.38E-05             | 0.277948           | -3.59779                     | T down vs N                            | 37.917  | 15.3532   | 6.47859    | 1         |
| cg27659622                                                                               | SCML4                         | 0.00037391        | 0.000373906          | 0.319218           | -3.13266                     | T down vs N                            | 20.128  | 12.2125   | 9.70792    | 1         |
| cg27663123                                                                               | CCDC88C                       | 0.00070577        | 0.000705768          | 0.260351           | -3.84097                     | T down vs N                            | 17.482  | 16.9619   | 15.5239    | 1         |
| cg27663279                                                                               | CYP2W1                        | 8.72E-05          | 8.72E-05             | 0.188501           | -5.30502                     | T down vs N                            | 27.064  | 26.0792   | 15.4179    | 1         |
| MS4A14;MS4A7;MS4A7;MS4A7;MS4A7;MS4A7                                                     |                               |                   |                      |                    |                              |                                        |         |           |            |           |
| cg27663936                                                                               | 14;MS4A7                      | 0.00047949        | 0.00047949           | 0.211507           | -4.72797                     | T down vs N                            | 19.066  | 22.6038   | 18.9687    | 1         |
| cg27664496                                                                               | DTX1                          | 0.0001569         | 0.000156903          | 4.55524            | 4.55524                      | T up vs N                              | 24.111  | 21.5337   | 14.2899    | 1         |
| cg27666046                                                                               | SECTM1                        | 1.13E-06          | 1.13E-06             | 0.196084           | -5.09986                     | T down vs N                            | 57.293  | 24.861    | 6.94287    | 1         |
| cg27666123                                                                               | CTXN3;CTXN3                   | 6.18E-05          | 6.18E-05             | 0.221634           | -4.51193                     | T down vs N                            | 28.905  | 21.2633   | 11.7702    | 1         |
| ch.1.1187063R                                                                            | GRIK3                         | 0.00015119        | 0.000151192          | 0.304579           | -3.28322                     | T down vs N                            | 24.291  | 13.2372   | 8.71917    | 1         |
| ch.1.1540554F                                                                            | TXNDC12                       | 0.00013731        | 0.000137311          | 0.263084           | -3.80106                     | T down vs N                            | 24.762  | 16.6996   | 10.7903    | 1         |
| ch.1.1767330R                                                                            | INADL                         | 0.00038265        | 0.00038265           | 0.303556           | -3.29428                     | T down vs N                            | 20.028  | 13.3123   | 10.635     | 1         |
| ch.1.2289685F                                                                            | BTBD8                         | 0.00082571        | 0.000825713          | 0.309087           | -3.23533                     | T down vs N                            | 16.861  | 12.912    | 12.2527    | 1         |
| ch.1.2348804F                                                                            | CNN3                          | 0.00011214        | 0.000112141          | 0.312328           | -3.20176                     | T down vs N                            | 25.773  | 12.6836   | 7.87399    | 1         |
| ch.1.3178922R                                                                            | NOS1AP;NOS1AP                 | 1.53E-05          | 1.53E-05             | 0.310942           | -3.21603                     | T down vs N                            | 37.228  | 12.7808   | 5.49294    | 1         |
| ch.1.3280899F                                                                            | MPZL1;MPZL1;MPZL1             | 0.00017737        | 0.000177372          | 0.163904           | -6.10112                     | T down vs N                            | 23.521  | 30.6327   | 20.8375    | 1         |
| ch.1.3577855R                                                                            | LAMC1                         | 4.78E-07          | 4.78E-07             | 0.175688           | -5.69191                     | T down vs N                            | 65.481  | 28.3259   | 6.92129    | 1         |
| ch.1.3947147F                                                                            | ATP2B4;ATP2B4                 | 1.36E-05          | 1.36E-05             | 0.165176           | -6.05414                     | T down vs N                            | 37.982  | 30.3714   | 12.794     | 1         |

| Probeset ID                      | UCSC_REFGENE_NAME       | p-value<br>(Type) | p-value (T vs.<br>N) | Ratio (T<br>vs. N) | Fold-<br>Change (T<br>vs. N) | Fold-Change (T vs.<br>N) (Description) | F(Type) | SS (Type) | SS (Error) | F (Error) |
|----------------------------------|-------------------------|-------------------|----------------------|--------------------|------------------------------|----------------------------------------|---------|-----------|------------|-----------|
| ch.1.4190055F                    | CENPF                   | 0.00112562        | 0.00112562           | 0.214326           | -4.66579                     | T down vs N                            | 15.672  | 22.2202   | 22.686     | 1         |
| ch.10.202299R                    | PRKCQ                   | 0.00136449        | 0.00136449           | 0.327293           | -3.05537                     | T down vs N                            | 14.956  | 11.684    | 12.4992    | 1         |
| ch.10.2094808R                   | LOXL4                   | 8.60E-05          | 8.60E-05             | 0.290819           | -3.43857                     | T down vs N                            | 27.135  | 14.2868   | 8.42403    | 1         |
| ch.10.2166669R                   | BTRC;BTRC               | 2.15E-05          | 2.15E-05             | 0.223109           | -4.48212                     | T down vs N                            | 35.051  | 21.0766   | 9.62103    | 1         |
| ch.10.2404278R                   | VTI1A                   | 1.02E-05          | 1.02E-05             | 0.317427           | -3.15033                     | T down vs N                            | 39.911  | 12.3331   | 4.94421    | 1         |
| FGFR2;FGFR2;FGFR2;FGFR2;FGFR2;FG |                         |                   |                      |                    |                              |                                        |         |           |            |           |
| ch.10.2610459F                   | FR2;FGFR2;FGFR2;FGFR2   | 0.00202497        | 0.00202497           | 0.316948           | -3.15509                     | T down vs N                            | 13.545  | 12.3656   | 14.6074    | 1         |
| ch.10.2770541R                   | FAM196A;DOCK1           | 4.72E-05          | 4.72E-05             | 0.295692           | -3.3819                      | T down vs N                            | 30.394  | 13.9049   | 7.31989    | 1         |
| ch.10.410979F                    | FRMD4A                  | 0.00112579        | 0.00112579           | 0.326588           | -3.06196                     | T down vs N                            | 15.671  | 11.7291   | 11.9754    | 1         |
| ch.10.818442R                    | ARHGAP12                | 0.00020009        | 0.000200087          | 0.291764           | -3.42742                     | T down vs N                            | 22.951  | 14.2118   | 9.90765    | 1         |
| ch.11.1702122F                   | GAB2                    | 0.00525152        | 0.00525152           | 0.250095           | -3.99848                     | T down vs N                            | 10.641  | 16.9319   | 23.8673    | 1         |
| ch.11.1980478F                   | AMOTL1                  | 0.00025565        | 0.000255648          | 0.290613           | -3.441                       | T down vs N                            | 21.818  | 14.3031   | 10.4893    | 1         |
| ch.11.2004977F                   | MAML2                   | 3.06E-05          | 3.06E-05             | 0.211294           | -4.73275                     | T down vs N                            | 32.912  | 22.6332   | 11.003     | 1         |
| ch.11.2451667R                   | BCL9L                   | 1.27E-06          | 1.27E-06             | 0.33242            | -3.00825                     | T down vs N                            | 56.223  | 11.361    | 3.23316    | 1         |
| ch.11.2683828R                   | ETS1;ETS1;ETS1          | 0.00027087        | 0.000270874          | 0.31899            | -3.1349                      | T down vs N                            | 21.555  | 12.2278   | 9.07649    | 1         |
| ch.11.2720214F                   | PRDM10;PRDM10           | 0.00023375        | 0.000233751          | 0.320877           | -3.11646                     | T down vs N                            | 22.228  | 12.1019   | 8.71127    | 1         |
| ch.11.340609R                    | TEAD1                   | 0.00013819        | 0.000138191          | 0.298578           | -3.34921                     | T down vs N                            | 24.731  | 13.6841   | 8.85311    | 1         |
| ch.11.721876F                    | NAT10;NAT10             | 0.00472083        | 0.00472083           | 0.323071           | -3.09529                     | T down vs N                            | 10.754  | 11.9571   | 17.7905    | 1         |
| ch.12.1023240F                   | LIMA1;LIMA1             | 0.00014065        | 0.000140649          | 0.269034           | -3.71701                     | T down vs N                            | 25.617  | 15.1953   | 8.89746    | 1         |
| ch.12.1171804F                   | ERBB3                   | 0.00723555        | 0.00723555           | 0.232493           | -4.3012                      | T down vs N                            | 9.4613  | 19.9347   | 33.7114    | 1         |
| ch.12.1173053R                   | ESYT1                   | 0.00020618        | 0.00020618           | 0.312557           | -3.19942                     | T down vs N                            | 22.81   | 12.6677   | 8.88568    | 1         |
| ch.12.158852F                    | NTF3                    | 3.57E-05          | 3.57E-05             | 0.275461           | -3.63028                     | T down vs N                            | 31.996  | 15.5695   | 7.78575    | 1         |
| ch.12.1983124R                   | SLC17A8;SLC17A8         | 0.00386489        | 0.00386489           | 0.286332           | -3.49245                     | T down vs N                            | 11.639  | 13.7871   | 17.7686    | 1         |
| ch.12.1993261F                   | ANO4                    | 0.00073744        | 0.000737439          | 0.289636           | -3.45261                     | T down vs N                            | 17.307  | 14.3812   | 13.2951    | 1         |
| TXNRD1;TXNRD1;TXNRD1;TXNRD1;TX   |                         |                   |                      |                    |                              |                                        |         |           |            |           |
| ch.12.2061504F                   | NRD1                    | 0.00256245        | 0.00256245           | 0.285061           | -3.50802                     | T down vs N                            | 12.737  | 14.7532   | 18.5332    | 1         |
| ch.12.2473323R                   | CIT                     | 5.87E-05          | 5.87E-05             | 0.246342           | -4.0594                      | T down vs N                            | 29.187  | 18.3848   | 10.0785    | 1         |
| ch.12.2480290F                   | CCDC64                  | 3.24E-05          | 3.24E-05             | 0.293446           | -3.40779                     | T down vs N                            | 32.568  | 14.0795   | 6.91698    | 1         |
| ch.12.2538228F                   | KDM2B;KDM2B             | 0.00011676        | 0.000116757          | 0.180963           | -5.52599                     | T down vs N                            | 25.57   | 27.3704   | 17.1267    | 1         |
| ch.12.602695F                    | ITPR2                   | 8.90E-06          | 8.90E-06             | 0.3301             | -3.02938                     | T down vs N                            | 40.877  | 11.506    | 4.50361    | 1         |
| ch.13.1081090R                   | KLF12                   | 3.71E-07          | 3.71E-07             | 0.268785           | -3.72045                     | T down vs N                            | 68.057  | 16.1678   | 3.80099    | 1         |
| ch.13.470465F                    | LHFP                    | 4.99E-05          | 4.99E-05             | 0.236653           | -4.2256                      | T down vs N                            | 30.085  | 19.453    | 10.3455    | 1         |
| ch.13.557053R                    | ENOX1;ENOX1             | 0.00074529        | 0.000745291          | 0.275024           | -3.63605                     | T down vs N                            | 18.42   | 13.6569   | 10.3802    | 1         |
| ch.14.1097636R                   | NPC2                    | 0.00026498        | 0.000264979          | 0.279612           | -3.57639                     | T down vs N                            | 21.655  | 15.2104   | 11.2385    | 1         |
| ch.15.1160351F                   | NEO1                    | 0.00172958        | 0.00172958           | 0.199003           | -5.02504                     | T down vs N                            | 14.1    | 24.4119   | 27.7021    | 1         |
| ch.16.406779R                    | CLEC16A                 | 1.63E-05          | 1.63E-05             | 0.309276           | -3.23336                     | T down vs N                            | 36.823  | 12.8986   | 5.60465    | 1         |
| ch.16.785175F                    | HS3ST4                  | 0.0067436         | 0.0067436            | 0.277691           | -3.60113                     | T down vs N                            | 9.6693  | 15.3754   | 25.442     | 1         |
| ch.17.1132965F                   | ETV4;ETV4               | 6.38E-06          | 6.38E-06             | 0.135137           | -7.39987                     | T down vs N                            | 43.237  | 37.5195   | 13.8843    | 1         |
| ch.17.1711350R                   | PRKCA                   | 1.04E-07          | 1.04E-07             | 0.166698           | -5.99889                     | T down vs N                            | 82.389  | 30.0629   | 5.83822    | 1         |
| ch.18.1546242R                   | ATP9B                   | 0.00074207        | 0.000742066          | 0.333088           | -3.00221                     | T down vs N                            | 17.282  | 11.3197   | 10.4798    | 1         |
| ch.18.189560F                    | RAB12                   | 0.0001021         | 0.000102099          | 0.316759           | -3.15698                     | T down vs N                            | 26.25   | 12.3784   | 7.54484    | 1         |
| ch.18.310800R                    | CEP192                  | 0.00029857        | 0.00029857           | 0.261106           | -3.82986                     | T down vs N                            | 21.118  | 16.889    | 12.796     | 1         |
| ch.18.316502R                    | C18orf1;C18orf1         | 0.00148193        | 0.00148193           | 0.301018           | -3.32207                     | T down vs N                            | 14.655  | 13.5005   | 14.7394    | 1         |
| ch.18.658499F                    | RPRD1A                  | 0.00192905        | 0.00192905           | 0.292085           | -3.42366                     | T down vs N                            | 13.714  | 14.1865   | 16.5511    | 1         |
| ch.18.672159R                    | FHOD3                   | 7.53E-05          | 7.53E-05             | 0.308331           | -3.24327                     | T down vs N                            | 27.84   | 12.966    | 7.45163    | 1         |
| ch.2.1116759R                    | PIGF;PIGF               | 0.00221569        | 0.00221569           | 0.19452            | -5.14086                     | T down vs N                            | 13.233  | 25.1059   | 30.3563    | 1         |
| ch.2.113772948R                  | LOC440839               | 8.03E-05          | 8.03E-05             | 0.296646           | -3.37102                     | T down vs N                            | 27.499  | 13.8315   | 8.04776    | 1         |
| ch.2.1615265F                    | NAGK                    | 0.00148237        | 0.00148237           | 0.317596           | -3.14865                     | T down vs N                            | 14.654  | 12.3217   | 13.4535    | 1         |
| ch.2.1701371R                    | HK2                     | 3.57E-06          | 3.57E-06             | 0.141214           | -7.08143                     | T down vs N                            | 47.611  | 35.8884   | 12.0606    | 1         |
| ch.2.2017299F                    | KIAA1310;KIAA1310       | 0.00228597        | 0.00228597           | 0.285076           | -3.50784                     | T down vs N                            | 13.125  | 14.7519   | 17.9829    | 1         |
| ch.2.2134493R                    | RFX8                    | 4.31E-05          | 4.31E-05             | 0.230488           | -4.33863                     | T down vs N                            | 30.912  | 20.1722   | 10.4412    | 1         |
| ch.2.2613291R                    | CNTNAP5                 | 9.98E-06          | 9.98E-06             | 0.319482           | -3.13007                     | T down vs N                            | 40.083  | 12.1948   | 4.8678     | 1         |
| ch.2.4639917R                    | ARMC9                   | 0.00250865        | 0.00250865           | 0.284161           | -3.51913                     | T down vs N                            | 13.49   | 13.1801   | 13.6785    | 1         |
| ch.2.731300R                     | ALK                     | 4.75E-05          | 4.75E-05             | 0.214207           | -4.66838                     | T down vs N                            | 30.362  | 22.2362   | 11.718     | 1         |
| ch.2.884792F                     | CRIM1                   | 0.00384318        | 0.00384318           | 0.300338           | -3.32959                     | T down vs N                            | 11.403  | 13.5514   | 19.014     | 1         |
| ch.20.209864F                    | PLCB4;PLCB4             | 0.00078161        | 0.000781612          | 0.318063           | -3.14403                     | T down vs N                            | 17.077  | 12.2901   | 11.5151    | 1         |
| ch.20.378824F                    | C20orf72                | 0.0031261         | 0.0031261            | 0.291352           | -3.43228                     | T down vs N                            | 12.074  | 14.2445   | 18.8768    | 1         |
| ch.22.217069R                    | CABIN1                  | 4.22E-06          | 4.22E-06             | 0.284666           | -3.51289                     | T down vs N                            | 46.328  | 14.7858   | 5.10653    | 1         |
| ch.22.528917R                    | HMGXB4;HMGXB4           | 0.0003406         | 0.000340598          | 0.242443           | -4.12468                     | T down vs N                            | 20.535  | 18.8059   | 14.6528    | 1         |
| ch.22.694298R                    | GRAP2                   | 3.76E-05          | 3.76E-05             | 0.232622           | -4.29882                     | T down vs N                            | 31.705  | 19.9195   | 10.0526    | 1         |
| ch.3.1012680R                    | CDC25A;CDC25A           | 0.00156379        | 0.00156379           | 0.250124           | -3.99802                     | T down vs N                            | 14.461  | 17.9872   | 19.9021    | 1         |
| ch.3.2399726R                    | PDIA5;PDIA5             | 0.00244844        | 0.00244844           | 0.286353           | -3.4922                      | T down vs N                            | 12.891  | 14.6471   | 18.1798    | 1         |
| ch.3.2438620R                    | ITGB5                   | 1.33E-05          | 1.33E-05             | 0.247639           | -4.03814                     | T down vs N                            | 38.125  | 18.2472   | 7.6578     | 1         |
| ch.3.3371471R                    | NLGN1                   | 4.88E-05          | 4.88E-05             | 0.266375           | -3.7541                      | T down vs N                            | 30.215  | 16.3901   | 8.67916    | 1         |
| ch.3.3564705F                    | MCF2L2                  | 0.00086657        | 0.000866566          | 0.170742           | -5.8568                      | T down vs N                            | 16.673  | 29.2638   | 28.0834    | 1         |
| ch.3.948191R                     | FYCO1                   | 0.00336003        | 0.00336003           | 0.326543           | -3.06239                     | T down vs N                            | 11.837  | 11.732    | 15.8577    | 1         |
| ch.4.255198F                     | TBC1D14;TBC1D14;TBC1D14 | 0.00105037        | 0.00105037           | 0.331906           | -3.0129                      | T down vs N                            | 15.933  | 11.393    | 11.4409    | 1         |
| ch.5.1258129F                    | MAST4;MAST4             | 0.00173889        | 0.00173889           | 0.323063           | -3.09537                     | T down vs N                            | 14.081  | 11.9577   | 13.5877    | 1         |
| ch.5.1264897R                    | MAST4;MAST4             | 2.80E-06          | 2.80E-06             | 0.294317           | -3.39769                     | T down vs N                            | 49.543  | 14.0115   | 4.525      | 1         |
| ch.5.2059852R                    | MCC;MCC                 | 0.00010684        | 0.000106838          | 0.19659            | -5.08673                     | T down vs N                            | 26.019  | 24.7823   | 15.2395    | 1         |
| ch.5.2173511R                    | HSD17B4                 | 0.00013601        | 0.000136005          | 0.198449           | -5.03909                     | T down vs N                            | 25.794  | 23.0554   | 13.4075    | 1         |
| ch.5.2517577F                    | SPOCK1                  | 0.00060293        | 0.000602926          | 0.325194           | -3.07508                     | T down vs N                            | 18.118  | 11.8189   | 10.4373    | 1         |

| Probeset ID   | UCSC_REFGENE_NAME                      | p-value<br>(Type) | p-value (T vs.<br>N) | Ratio (T<br>vs. N) | Fold-<br>Change (T<br>vs. N) | Fold-Change (T vs.<br>N) (Description) | F(Type) | SS (Type) | SS (Error) | F (Error) |
|---------------|----------------------------------------|-------------------|----------------------|--------------------|------------------------------|----------------------------------------|---------|-----------|------------|-----------|
| ch.5.2522686R | SPOCK1                                 | 4.36E-06          | 4.36E-06             | 0.330679           | -3.02408                     | T down vs N                            | 46.074  | 11.4696   | 3.98305    | 1         |
| ch.5.2559743R | CTNNA1                                 | 0.0001059         | 0.000105902          | 0.274056           | -3.64889                     | T down vs N                            | 26.064  | 15.6933   | 9.63377    | 1         |
| ch.5.2738996F | TCERG1;TCERG1                          | 0.00251937        | 0.00251937           | 0.272446           | -3.67045                     | T down vs N                            | 12.794  | 15.8365   | 19.8049    | 1         |
| ch.5.3000938F | IL12B                                  | 0.00657072        | 0.00657072           | 0.269803           | -3.70641                     | T down vs N                            | 9.7465  | 16.0748   | 26.3886    | 1         |
| ch.5.432310R  | MYO10<br>RAI14;RAI14;RAI14;RAI14;RAI14 | 1.90E-05          | 1.90E-05             | 0.242357           | -4.12614                     | T down vs N                            | 35.833  | 18.8153   | 8.40133    | 1         |
| ch.5.754313F  | 4                                      | 0.0019383         | 0.0019383            | 0.333234           | -3.00089                     | T down vs N                            | 13.697  | 11.3106   | 13.212     | 1         |
| ch.6.1239582F | TRAM2                                  | 0.00021029        | 0.000210288          | 0.22818            | -4.38251                     | T down vs N                            | 22.718  | 20.4498   | 14.4026    | 1         |
| ch.6.1297321R | BMP5                                   | 0.00205504        | 0.00205504           | 0.134613           | -7.4287                      | T down vs N                            | 13.493  | 37.6654   | 44.6631    | 1         |
| ch.6.2925136R | MTHFD1L                                | 0.001764          | 0.001764             | 0.329211           | -3.03756                     | T down vs N                            | 14.03   | 11.562    | 13.1858    | 1         |
| ch.6.609614F  | ACOT13;ACOT13                          | 0.00292394        | 0.00292394           | 0.272616           | -3.66816                     | T down vs N                            | 12.295  | 15.8213   | 20.5895    | 1         |
| ch.7.1100907F | TNS3                                   | 8.94E-05          | 8.94E-05             | 0.227832           | -4.38919                     | T down vs N                            | 26.936  | 20.492    | 12.1724    | 1         |
| ch.7.1172609R | GRB10;GRB10;GRB10;GRB10                | 7.74E-05          | 7.74E-05             | 0.233488           | -4.28288                     | T down vs N                            | 27.69   | 19.8182   | 11.4517    | 1         |
| ch.7.1427355R | TYW1                                   | 8.37E-06          | 8.37E-06             | 0.191874           | -5.21175                     | T down vs N                            | 41.303  | 25.5277   | 9.88886    | 1         |
| ch.7.1905850F | CLDN12                                 | 0.00131627        | 0.00131627           | 0.310258           | -3.22313                     | T down vs N                            | 15.089  | 12.8291   | 13.6038    | 1         |
| ch.7.2066570R | TRRAP                                  | 0.00128318        | 0.00128318           | 0.297455           | -3.36185                     | T down vs N                            | 15.183  | 13.7695   | 14.5107    | 1         |
| ch.7.2535718F | PTPRZ1                                 | 0.00075098        | 0.00075098           | 0.28534            | -3.50459                     | T down vs N                            | 17.76   | 13.8637   | 11.7093    | 1         |
| ch.7.2635062R | SNDP1                                  | 4.19E-05          | 4.19E-05             | 0.33043            | -3.02636                     | T down vs N                            | 31.074  | 11.4852   | 5.91381    | 1         |
| ch.7.2691555F | ZC3HC1                                 | 0.00341686        | 0.00341686           | 0.298127           | -3.35427                     | T down vs N                            | 11.783  | 13.7183   | 18.6285    | 1         |
| ch.7.2864275F | CREB3L2                                | 0.00011534        | 0.000115337          | 0.262942           | -3.80312                     | T down vs N                            | 25.631  | 16.7131   | 10.4329    | 1         |
| ch.7.2968824F | AGK                                    | 0.00050179        | 0.000501791          | 0.279789           | -3.57412                     | T down vs N                            | 18.876  | 15.1953   | 12.8802    | 1         |
| ch.7.2986028F | LOC100124692                           | 8.25E-05          | 8.25E-05             | 0.324415           | -3.08247                     | T down vs N                            | 27.355  | 11.8695   | 6.94254    | 1         |
| ch.7.3089487R | CNTNAP2                                | 0.00021724        | 0.000217238          | 0.192434           | -5.19658                     | T down vs N                            | 22.567  | 25.4376   | 18.0357    | 1         |
| ch.7.3189261R | PRKAG2;PRKAG2                          | 7.09E-06          | 7.09E-06             | 0.272106           | -3.67504                     | T down vs N                            | 42.477  | 15.8669   | 5.97661    | 1         |
| ch.7.3356624R | DNAJB6                                 | 0.00081414        | 0.000814139          | 0.329068           | -3.03888                     | T down vs N                            | 16.916  | 11.571    | 10.9442    | 1         |
| ch.7.557703F  | DNAH11                                 | 0.00326443        | 0.00326443           | 0.314257           | -3.18211                     | T down vs N                            | 12.532  | 10.9811   | 12.2671    | 1         |
| ch.8.1073630F | KIAA0146                               | 0.00080132        | 0.000801323          | 0.327718           | -3.0514                      | T down vs N                            | 17.49   | 10.9711   | 9.40909    | 1         |
| ch.8.1077192R | PRKDC;PRKDC                            | 0.00024224        | 0.000242243          | 0.330273           | -3.0278                      | T down vs N                            | 22.064  | 11.4951   | 8.33601    | 1         |
| ch.8.120035F  | CSMD1                                  | 0.00135832        | 0.00135832           | 0.261186           | -3.82869                     | T down vs N                            | 14.973  | 16.8813   | 18.0391    | 1         |
| ch.8.1995451R | MATN2;MATN2                            | 0.0002604         | 0.000260399          | 0.298381           | -3.35142                     | T down vs N                            | 21.734  | 13.699    | 10.085     | 1         |
| ch.8.2599852F | ASAP1                                  | 0.00095743        | 0.000957428          | 0.256294           | -3.90177                     | T down vs N                            | 16.287  | 17.3601   | 17.0543    | 1         |
| ch.8.842844F  | UNC5D                                  | 9.82E-06          | 9.82E-06             | 0.245853           | -4.06747                     | T down vs N                            | 40.195  | 18.437    | 7.33897    | 1         |
| ch.8.969355F  | SFRP1                                  | 2.55E-05          | 2.55E-05             | 0.307208           | -3.25512                     | T down vs N                            | 33.999  | 13.0465   | 6.13972    | 1         |
| ch.9.2285199R | MED27                                  | 4.54E-05          | 4.54E-05             | 0.206119           | -4.85156                     | T down vs N                            | 32.021  | 21.9868   | 10.2996    | 1         |
| ch.9.357218F  | ADAMTSL1;ADAMTSL1                      | 0.00069102        | 0.000691018          | 0.296623           | -3.37128                     | T down vs N                            | 17.567  | 13.8332   | 12.5995    | 1         |
| ch.9.837340R  | PTAR1                                  | 0.00066699        | 0.000666993          | 0.31242            | -3.20082                     | T down vs N                            | 17.709  | 12.6773   | 11.454     | 1         |
| ch.X.2195099F | PASD1                                  | 0.00379146        | 0.00379146           | 0.291609           | -3.42925                     | T down vs N                            | 11.447  | 14.224    | 19.8821    | 1         |
| ch.X.253162F  | CTPS2;CTPS2;CTPS2                      | 0.00634994        | 0.00634994           | 0.283037           | -3.53311                     | T down vs N                            | 10.045  | 14.0434   | 20.9712    | 1         |
