# Supplementary material
Source: PubMed Central journal article supplement (PMC4028366)
Supplement: NIHMS545812-supplement-401_2013_1218_MOESM27_ESM.pdf [file NIHMS545812-supplement-401_2013_1218_MOESM27_ESM.pdf]

**Manuscript Title:** Comparative Multidimensional Molecular Analyses of Pediatric Diffuse Intrinsic Pontine Glioma Reveals Distinct Molecular Subtypes  
**Journal:** Acta Neuropathologica

**Authors:** Amanda M. Saratsis, Madhuri Kambhampati, Kendall Snyder, Sriveidi Yadavilli, Joe Devaney, Brennan Harmon, Jordan Hall, Eric H. Raabe, Ping An, Melanie Weingart, Brian Rood, Suresh Magge, Roger J. Packer, Javad Nazarian

**Corresponding Author:**  
 Javad Nazarian, Children's National Medical Center, Center for Genetic Medicine  
 111 Michigan Ave., NW, Washington DC, 20010  
 Phone: 202-476-6022 Fax: 202-476-6014  
 Email: JNazarian@CNMC.org

| Probeset ID | UCSC_REFGENE_NAME                                                 | p-value (Subgroup) | p-value (1 vs. 2) | Ratio (1 vs. 2) | Fold-Change (1 vs. 2) | Fold-Change (1 vs. 2) (Description) | F (Subgroup) | SS (Subgroup) | SS (Error) | F (Error) |
|-------------|-------------------------------------------------------------------|--------------------|-------------------|-----------------|-----------------------|-------------------------------------|--------------|---------------|------------|-----------|
| cg00007987  | ZNF581                                                            | 0.00013265         | 5.57E-05          | 3.29E-05        | -30359.9              | 1 down vs 2                         | 55.8239      | 348.787       | 18.744     | 1         |
| cg00012036  | H3F3B                                                             | 1.39E-07           | 1.59E-07          | 4.83763         | 4.83763               | 1 up vs 2                           | 576.162      | 11.4162       | 0.0594427  | 1         |
| cg00049894  | NOM1                                                              | 1.65E-05           | 6.43E-06          | 0.176644        | -5.66112              | 1 down vs 2                         | 114.798      | 9.60097       | 0.250902   | 1         |
| cg00088227  | GCC1                                                              | 5.57E-06           | 4.24E-06          | 7.2954          | 7.2954                | 1 up vs 2                           | 166.264      | 15.8525       | 0.286036   | 1         |
|             | CD46;CD46;CD46;CD46;CD46;CD46;CD46;CD46;CD46;CD46;CD46;CD46;CD46; |                    |                   |                 |                       |                                     |              |               |            |           |
| cg00102714  | CD46;CD46;CD46                                                    | 0.00024972         | 8.22E-05          | 6.56154         | 6.56154               | 1 up vs 2                           | 44.6401      | 10.6264       | 0.714139   | 1         |
| cg00112091  | TEAD1;TEAD1                                                       | 2.82E-05           | 4.27E-05          | 0.191176        | -5.23079              | 1 down vs 2                         | 95.6063      | 13.9894       | 0.438968   | 1         |
| cg00213643  | SPG7                                                              | 7.99E-05           | 2.79E-05          | 0.24144         | -4.14181              | 1 down vs 2                         | 66.64        | 6.20087       | 0.279151   | 1         |
| cg00241218  | HLA-B                                                             | 1.06E-05           | 4.26E-06          | 0.118249        | -8.45673              | 1 down vs 2                         | 133.745      | 14.7362       | 0.330542   | 1         |
| cg00281273  | LPCAT1                                                            | 0.00013946         | 0.0001026         | 3.07E-08        | -3.26E+07             | 1 down vs 2                         | 54.8504      | 1194.1        | 65.3106    | 1         |
| cg00446722  | SDC2                                                              | 9.46E-05           | 4.61E-05          | 6.52122         | 6.52122               | 1 up vs 2                           | 62.8465      | 12.128        | 0.578934   | 1         |
| cg00477226  | BTLA;BTLA                                                         | 7.17E-06           | 7.01E-06          | 5.93201         | 5.93201               | 1 up vs 2                           | 152.591      | 13.8632       | 0.272555   | 1         |
| cg00522328  | ABCF1;ABCF1                                                       | 2.59E-05           | 3.11E-05          | 0.158783        | -6.2979               | 1 down vs 2                         | 98.34        | 15.9432       | 0.486369   | 1         |
| cg00549758  | C20orf185                                                         | 4.07E-05           | 1.99E-05          | 5.01598         | 5.01598               | 1 up vs 2                           | 84.1804      | 8.97938       | 0.320005   | 1         |
| cg00629217  | LNX1;LNX1                                                         | 0.00018684         | 9.81E-05          | 6.14119         | 6.14119               | 1 up vs 2                           | 49.4766      | 11.6689       | 0.707542   | 1         |
| cg00761861  | VTI1B                                                             | 0.00010581         | 3.98E-05          | 8.70E-09        | -1.15E+08             | 1 down vs 2                         | 94.8029      | 620.427       | 16.361     | 1         |
| cg00806253  | GABBR1;GABBR1;GABBR1                                              | 0.00017365         | 7.40E-05          | 0.0746362       | -13.3983              | 1 down vs 2                         | 50.7726      | 22.161        | 1.30943    | 1         |
| cg00832635  | ZNF492                                                            | 0.00027331         | 9.25E-05          | 0.00027625      | -3619.93              | 1 down vs 2                         | 43.2275      | 203.575       | 14.1281    | 1         |
|             | SNORD88A;C19orf48;C19orf48;S                                      |                    |                   |                 |                       |                                     |              |               |            |           |
| cg00847309  | NORD88B                                                           | 2.30E-06           | 2.74E-06          | 0.193526        | -5.16726              | 1 down vs 2                         | 224.22       | 12.5876       | 0.168419   | 1         |
| cg00860570  | PTCD3;POLR1A;PTCD3                                                | 5.15E-05           | 3.18E-05          | 4.51864         | 4.51864               | 1 up vs 2                           | 77.6193      | 8.51985       | 0.329294   | 1         |
| cg00882130  | INO80D                                                            | 4.63E-05           | 1.71E-05          | 0.157229        | -6.36013              | 1 down vs 2                         | 80.5419      | 10.7388       | 0.399996   | 1         |
| cg00907884  | HGFAC                                                             | 2.81E-07           | 3.54E-07          | 4.58898         | 4.58898               | 1 up vs 2                           | 455.05       | 11.0149       | 0.0726178  | 1         |
| cg00920422  | TBCD;ZNF750                                                       | 0.00012345         | 5.52E-05          | 0.111403        | -8.97639              | 1 down vs 2                         | 57.2499      | 16.1263       | 0.84505    | 1         |
| cg00922748  | NRIP2                                                             | 1.36E-05           | 1.64E-05          | 0.178229        | -5.61076              | 1 down vs 2                         | 122.808      | 14.0089       | 0.342214   | 1         |
| cg00949446  | CPN2                                                              | 7.05E-06           | 7.92E-06          | 0.182436        | -5.48138              | 1 down vs 2                         | 153.491      | 13.2728       | 0.259417   | 1         |
| cg00960781  | TMEM26                                                            | 7.38E-06           | 7.92E-06          | 8.33408         | 8.33408               | 1 up vs 2                           | 151.071      | 20.2921       | 0.402965   | 1         |
| cg00996051  | HSPC159                                                           | 3.16E-06           | 1.50E-06          | 0.152942        | -6.53843              | 1 down vs 2                         | 201.457      | 12.0661       | 0.179683   | 1         |
| cg01053349  | TGIF2LY                                                           | 0.00019917         | 8.51E-05          | 8.43E-05        | -11866.4              | 1 down vs 2                         | 48.3705      | 289.845       | 17.9766    | 1         |
| cg01060358  | RNASEH2B;RNASEH2B                                                 | 2.14E-06           | 8.90E-07          | 0.198035        | -5.04961              | 1 down vs 2                         | 229.796      | 8.57085       | 0.111893   | 1         |
| cg01099580  | MINPP1                                                            | 0.00011017         | 4.74E-05          | 6.09496         | 6.09496               | 1 up vs 2                           | 59.5794      | 10.7894       | 0.543279   | 1         |
| cg01108230  | ELAC2;ELAC2;ELAC2                                                 | 5.77E-06           | 2.35E-06          | 1.87E-16        | -5.36E+15             | 1 down vs 2                         | 830.294      | 2276.93       | 5.48463    | 1         |
| cg01200965  | HK2                                                               | 3.50E-05           | 2.64E-05          | 0.109153        | -9.16147              | 1 down vs 2                         | 88.6734      | 19.6722       | 0.665549   | 1         |
| cg01207176  | MGAT3;MGAT3;MGAT3                                                 | 9.15E-05           | 4.25E-05          | 0.0068388       | -146.225              | 1 down vs 2                         | 63.5818      | 84.305        | 3.97779    | 1         |
| cg01209943  | CDKN3;CDKN3                                                       | 0.00022117         | 7.21E-05          | 6.64418         | 6.64418               | 1 up vs 2                           | 46.6072      | 10.7339       | 0.69092    | 1         |
| cg01254977  | HLC5                                                              | 1.47E-05           | 1.82E-05          | 6.7314          | 6.7314                | 1 up vs 2                           | 119.598      | 17.2815       | 0.433489   | 1         |
| cg01272081  | TOPORS                                                            | 4.66E-06           | 7.24E-06          | 0.211965        | -4.71776              | 1 down vs 2                         | 176.546      | 12.3106       | 0.209191   | 1         |
| cg01286950  | AFF3;AFF3                                                         | 4.91E-07           | 8.41E-07          | 0.189408        | -5.27961              | 1 down vs 2                         | 377.301      | 14.5775       | 0.115909   | 1         |
| cg01287600  | CCT4                                                              | 1.85E-05           | 1.85E-05          | 5.97431         | 5.97431               | 1 up vs 2                           | 110.483      | 14.1129       | 0.383214   | 1         |
| cg01293277  | CLEC12A;CLEC12A                                                   | 3.49E-07           | 2.11E-07          | 7.03064         | 7.03064               | 1 up vs 2                           | 423.267      | 14.1126       | 0.100026   | 1         |
| cg01333788  | GJB5                                                              | 0.00011611         | 6.57E-05          | 0.0907609       | -11.018               | 1 down vs 2                         | 58.4963      | 20.9408       | 1.07396    | 1         |
| cg01340314  | ARL8A                                                             | 3.97E-05           | 1.80E-05          | 5.13551         | 5.13551               | 1 up vs 2                           | 84.9435      | 9.01096       | 0.318246   | 1         |
| cg01348442  | CACNA2D3                                                          | 8.65E-05           | 3.86E-05          | 0.121356        | -8.24023              | 1 down vs 2                         | 64.8415      | 14.8785       | 0.688381   | 1         |
| cg01380747  | EEFSEC                                                            | 8.42E-05           | 3.74E-05          | 0.192951        | -5.18266              | 1 down vs 2                         | 65.4385      | 9.03969       | 0.414421   | 1         |
| cg01383997  | CHCHD6                                                            | 6.95E-06           | 2.69E-06          | 0.16952         | -5.89901              | 1 down vs 2                         | 154.189      | 10.0442       | 0.195425   | 1         |
| cg01411142  | INTS10                                                            | 2.71E-06           | 1.05E-06          | 78.3575         | 78.3575               | 1 up vs 2                           | 1213.46      | 32.2043       | 0.0530786  | 1         |
| cg01466967  | DEPDC1B;DEPDC1B                                                   | 7.52E-08           | 3.20E-08          | 5.22208         | 5.22208               | 1 up vs 2                           | 707.706      | 8.99916       | 0.0381479  | 1         |
| cg01485948  | MNT                                                               | 2.37E-05           | 8.55E-06          | 5.80939         | 5.80939               | 1 up vs 2                           | 101.511      | 9.63732       | 0.284817   | 1         |
| cg01487542  | CMAH;CMAH                                                         | 6.85E-05           | 2.75E-05          | 7.5776          | 7.5776                | 1 up vs 2                           | 113.281      | 13.0088       | 0.287092   | 1         |
| cg01520956  | FAM47E                                                            | 7.46E-05           | 6.29E-05          | 0.135689        | -7.36981              | 1 down vs 2                         | 68.2523      | 16.6688       | 0.732672   | 1         |
| cg01528063  | MIDN                                                              | 6.15E-07           | 6.49E-07          | 5.92186         | 5.92186               | 1 up vs 2                           | 349.765      | 14.1491       | 0.121359   | 1         |
| cg01554453  | ENPP1                                                             | 2.25E-06           | 2.94E-06          | 0.199837        | -5.00407              | 1 down vs 2                         | 226.09       | 12.4914       | 0.165748   | 1         |
| cg01561856  | KIAA1244                                                          | 0.00013092         | 5.20E-05          | 0.0897835       | -11.1379              | 1 down vs 2                         | 56.0812      | 18.6634       | 0.998378   | 1         |
| cg01621090  | DNAH17                                                            | 7.88E-05           | 3.43E-05          | 0.0170502       | -58.6504              | 1 down vs 2                         | 66.9779      | 54.9799       | 2.4626     | 1         |
| cg01653419  | HIPK2;HIPK2                                                       | 9.35E-05           | 5.46E-05          | 0.16074         | -6.22123              | 1 down vs 2                         | 63.0924      | 12.2812       | 0.583963   | 1         |

























| Probeset ID   | UCSC_REFGENE_NAME             | p-value<br>(Subgroup) | p-value (1<br>vs. 2) | Ratio (1 vs.<br>2) | Fold-<br>Change (1<br>vs. 2) | Fold-Change<br>(1 vs. 2)<br>(Description) | F<br>(Subgroup) | SS<br>(Subgroup) | SS (Error) | F<br>(Error) |
|---------------|-------------------------------|-----------------------|----------------------|--------------------|------------------------------|-------------------------------------------|-----------------|------------------|------------|--------------|
| cg26705583    | SGTB;NLN                      | 5.40E-07              | 2.17E-07             | 4.96115            | 4.96115                      | 1 up vs 2                                 | 365.481         | 8.28722          | 0.0680244  | 1            |
| cg26727980    | DKKL1;TEAD2                   | 9.35E-06              | 3.80E-06             | 1.89E-10           | -5.28E+09                    | 1 down vs 2                               | 254.271         | 933.165          | 9.17492    | 1            |
| cg26771583    | BEST2                         | 0.0001647             | 6.21E-05             | 2.12E-19           | -4.71E+18                    | 1 down vs 2                               | 153.844         | 3207.59          | 41.6994    | 1            |
| cg26787449    | BAD;BAD                       | 1.18E-08              | 4.73E-09             | 4.75384            | 4.75384                      | 1 up vs 2                                 | 1315.09         | 7.85221          | 0.0179126  | 1            |
| cg26831081    | TAF4                          | 1.34E-07              | 1.13E-07             | 0.22947            | -4.35788                     | 1 down vs 2                               | 1401.56         | 9.27281          | 0.0165401  | 1            |
| cg26831220    | IL34                          | 0.00021685            | 9.72E-05             | 0.132762           | -7.53228                     | 1 down vs 2                               | 46.9347         | 13.6583          | 0.873018   | 1            |
| cg26849830    | SSH1                          | 8.65E-07              | 3.06E-07             | 0.0992944          | -10.0711                     | 1 down vs 2                               | 311.862         | 16.5211          | 0.158927   | 1            |
| cg26863013    | OR10H2                        | 7.80E-05              | 9.51E-05             | 8.5557             | 8.5557                       | 1 up vs 2                                 | 67.2267         | 21.9386          | 0.979014   | 1            |
| cg26872977    | MKS1;MKS1                     | 2.00E-07              | 8.56E-08             | 4.79243            | 4.79243                      | 1 up vs 2                                 | 510.233         | 8.11222          | 0.0476972  | 1            |
| cg26918442    | ADAL;ADAL;LCMT2;LCMT2         | 7.96E-07              | 3.71E-07             | 5.54921            | 5.54921                      | 1 up vs 2                                 | 320.702         | 9.97591          | 0.0933194  | 1            |
| cg26919347    | STBD1                         | 8.44E-06              | 4.32E-06             | 0.197775           | -5.05624                     | 1 down vs 2                               | 265.026         | 8.58571          | 0.0809892  | 1            |
| cg26933795    | POP5;POP5                     | 2.81E-05              | 1.20E-05             | 8.67777            | 8.67777                      | 1 up vs 2                                 | 95.6614         | 15.3946          | 0.482785   | 1            |
| cg26971928    | RBPMS;RBPMS;RBPMS;RBPMS       | 1.16E-05              | 1.34E-05             | 0.173758           | -5.75515                     | 1 down vs 2                               | 129.66          | 14.214           | 0.328876   | 1            |
| cg27076139    | ADCYAP1R1                     | 8.40E-05              | 4.09E-05             | 5.08001            | 5.08001                      | 1 up vs 2                                 | 104.235         | 8.46659          | 0.203066   | 1            |
| cg27107150    | TPSG1                         | 2.32E-06              | 2.42E-06             | 5.63778            | 5.63778                      | 1 up vs 2                                 | 223.759         | 13.3536          | 0.179036   | 1            |
| cg27108600    | PPP1CA;PPP1CA;PPP1CA          | 2.74E-05              | 2.87E-05             | 0.175067           | -5.71209                     | 1 down vs 2                               | 96.5022         | 13.6438          | 0.424151   | 1            |
| cg27108998    | PRDM15;PRDM15                 | 6.45E-06              | 7.47E-05             | 0.0295179          | -33.8778                     | 1 down vs 2                               | 158.134         | 127.648          | 2.42164    | 1            |
| cg27121959    | PGR                           | 7.72E-05              | 5.95E-05             | 0.131804           | -7.58701                     | 1 down vs 2                               | 67.4528         | 16.6303          | 0.739643   | 1            |
| cg27206345    | VPS25                         | 8.42E-06              | 3.63E-06             | 21.3403            | 21.3403                      | 1 up vs 2                                 | 687.3           | 16.7128          | 0.0486331  | 1            |
| cg27224392    | SFXN2;SFXN2;ARL3              | 1.04E-05              | 1.14E-05             | 5.58757            | 5.58757                      | 1 up vs 2                                 | 134.449         | 13.4934          | 0.301081   | 1            |
| cg27245606    | LTB;LTB                       | 9.76E-06              | 8.21E-06             | 0.146858           | -6.80932                     | 1 down vs 2                               | 137.357         | 15.2882          | 0.333907   | 1            |
| cg27253670    | SOX21                         | 1.55E-06              | 2.30E-06             | 0.195344           | -5.11918                     | 1 down vs 2                               | 256.432         | 13.4081          | 0.156861   | 1            |
| cg27265118    | SETMAR;SETMAR                 | 2.94E-07              | 4.56E-07             | 0.15335            | -6.52103                     | 1 down vs 2                               | 448.165         | 17.8956          | 0.119792   | 1            |
| cg27289662    | OCA2                          | 0.00020093            | 8.25E-05             | 6.82561            | 6.82561                      | 1 up vs 2                                 | 48.2199         | 11.9787          | 0.745255   | 1            |
| cg27372468    | SLC22A4;SLC22A4               | 5.77E-05              | 5.75E-05             | 5.95033            | 5.95033                      | 1 up vs 2                                 | 74.6383         | 14.0849          | 0.566128   | 1            |
| cg27462405    | SEMA5A                        | 1.29E-06              | 1.52E-06             | 4.99909            | 4.99909                      | 1 up vs 2                                 | 272.429         | 12.0264          | 0.132435   | 1            |
| cg27627570    | CERCAM                        | 5.23E-05              | 6.97E-05             | 7.11908            | 7.11908                      | 1 up vs 2                                 | 77.2347         | 18.8858          | 0.733576   | 1            |
| cg27655921    | C15orf59                      | 1.09E-05              | 2.48E-05             | 0.196315           | -5.09386                     | 1 down vs 2                               | 132.487         | 15.5432          | 0.351957   | 1            |
| cg27658391    | TMCO6                         | 0.00015343            | 6.15E-05             | 0.153523           | -6.51367                     | 1 down vs 2                               | 53.0389         | 11.3113          | 0.639796   | 1            |
| cg27662875    | IRF3                          | 7.11E-05              | 2.72E-05             | 0.13529            | -7.39153                     | 1 down vs 2                               | 69.4176         | 12.6861          | 0.54825    | 1            |
| ch.15.481908R | UBR1                          | 9.67E-05              | 4.14E-05             | 2.88E-21           | -3.47E+20                    | 1 down vs 2                               | 201.373         | 3975.64          | 39.4854    | 1            |
| ch.19.683370F | RAB8A                         | 4.60E-05              | 1.94E-05             | 4.66293            | 4.66293                      | 1 up vs 2                                 | 80.6982         | 7.77413          | 0.289008   | 1            |
| ch.3.3596501R | EIF4G1;SNORD66;EIF4G1;EIF4G1; | 0.0002126             | 9.20E-05             | 3.43E-13           | -2.92E+12                    | 1 down vs 2                               | 419.604         | 1388.28          | 4.96284    | 1            |
| ch.7.8314F    | EIF4G1;EIF4G1                 | 4.17E-07              | 1.81E-07             | 4.71175            | 4.71175                      | 1 up vs 2                                 | 398.587         | 7.97263          | 0.0600066  | 1            |
| ch.X.1002740R | FAM20C                        | 2.89E-06              | 1.32E-06             | 2.74E-33           | -3.66E+32                    | 1 down vs 2                               | 7396.75         | 9835.12          | 1.99448    | 1            |
| ch.X.1002740R | HEPH;HEPH;HEPH                | 2.89E-06              | 1.32E-06             | 2.74E-33           | -3.66E+32                    | 1 down vs 2                               | 7396.75         | 9835.12          | 1.99448    | 1            |
