# Supplementary material
Source: PubMed Central journal article supplement (PMC4028366)
Supplement: NIHMS545812-supplement-401_2013_1218_MOESM28_ESM.pdf [file NIHMS545812-supplement-401_2013_1218_MOESM28_ESM.pdf]

**File: ESM\_25 (Online Resource 25)**

**Manuscript Title:** Comparative Multidimensional Molecular Analyses of Pediatric Diffuse Intrinsic Pontine Glioma Reveals Distinct Molecular

**Journal:** Acta Neuropathologica

**Authors:** Amanda M. Saratsis, Madhuri Kambhampati, Kendall Snyder, Sridevi Yadavilli , Joe Devaney, Brennan Harmon, Jordan Hall, Eric H. Raabe, Ping An, Melanie Weingart, Brian Rood, Suresh Magge, Roger J. Packer, Javad Nazarian

**Corresponding Author:**

Javad Nazarian, Children's National Medical Center, Center for Genetic Medicine

111 Michigan Ave., NW, Washington DC, 20010

Phone: 202-476-6022

Fax: 202-476-6014

Email: [JNazarian@CNMC.org](mailto:JNazarian@CNMC.org)

**Online Resource 25**

| Top Canonical Pathways                                                     | Dysregulated DNA Methylation by DIPG Subgroup                                                                                                                                                                                                                                                                                                                                                                                                                                                                                                                                                                                                                                                                                                                       |                                                                                                                                                                                                                                                                                                                                                                                                                                                                                                                                                                                                                                                                         |
|----------------------------------------------------------------------------|---------------------------------------------------------------------------------------------------------------------------------------------------------------------------------------------------------------------------------------------------------------------------------------------------------------------------------------------------------------------------------------------------------------------------------------------------------------------------------------------------------------------------------------------------------------------------------------------------------------------------------------------------------------------------------------------------------------------------------------------------------------------|-------------------------------------------------------------------------------------------------------------------------------------------------------------------------------------------------------------------------------------------------------------------------------------------------------------------------------------------------------------------------------------------------------------------------------------------------------------------------------------------------------------------------------------------------------------------------------------------------------------------------------------------------------------------------|
|                                                                            | Telomerase Signaling ( <i>p</i> -value 1.04E-02)<br>Cell Cycle Checkpoint Regulation G1/S ( <i>p</i> -value 9.53E-03)                                                                                                                                                                                                                                                                                                                                                                                                                                                                                                                                                                                                                                               |                                                                                                                                                                                                                                                                                                                                                                                                                                                                                                                                                                                                                                                                         |
| <i>Gene</i><br>(Fold Change In Methylation Value, Subgroup 1 / Subgroup 2) | <i>HDAC4</i> (-6.53); <i>MYC</i> (-5.60); <i>PP2R1A</i> (-6.00); <i>CDKN1B</i> (5.86977)                                                                                                                                                                                                                                                                                                                                                                                                                                                                                                                                                                                                                                                                            |                                                                                                                                                                                                                                                                                                                                                                                                                                                                                                                                                                                                                                                                         |
| Top Networks of Molecular Interaction                                      | Genes Hypomethylated in Subgroup 1 & Hypermethylated in Subgroup 2                                                                                                                                                                                                                                                                                                                                                                                                                                                                                                                                                                                                                                                                                                  | Genes Hypomethylated in Subgroup 2 & Hypermethylated in Subgroup 1                                                                                                                                                                                                                                                                                                                                                                                                                                                                                                                                                                                                      |
|                                                                            | Tissue Morphology, Cancer, Tumor Morphology                                                                                                                                                                                                                                                                                                                                                                                                                                                                                                                                                                                                                                                                                                                         | Connective Tissue Development, Embryonic Development, Organ Development                                                                                                                                                                                                                                                                                                                                                                                                                                                                                                                                                                                                 |
| <i>Gene</i><br>(Fold Change In Methylation Value, Subgroup 1 / Subgroup 2) | <i>ACVR2A</i> (-7.21459); <i>Akt</i> ; <i>Ap1</i> ; <i>CHRNA7</i> (-5.27157); ( <i>CYTH3</i> -8.89238); <i>DHFR</i> (-4.47588); <i>DNER</i> (-5.04539); <i>ENPP1</i> (-5.00407); <i>FSH</i> ; <i>FSTL3</i> (-5.28393); <i>GMNN</i> (-7.75953); <i>GRIP2</i> (-13.06); <i>HDAC4</i> (-6.53147); <i>Histone h3</i> ; <i>Histone h4</i> ; <i>HK2</i> (-9.16147); <i>MYC</i> (-5.5888); <i>NPPC</i> (-5.54203); <i>NRIP2</i> (-5.61076); <i>PDGF BB</i> ; <i>PIM3</i> (-6.76449); <i>PP2A</i> ; <i>PPP2R1A</i> (-5.98955); <i>PRDX6</i> (-7.92103); <i>Rar</i> ; <i>Rb</i> ; <i>RNA polymerase II</i> ; <i>RPS9</i> (-9.16881); <i>RXRβ</i> (-4.63094); <i>SLC6A2</i> (-4.82568); <i>SUDS3</i> (-5.33278); <i>TAF4</i> (-4.35788); <i>THR</i> ; <i>ZBTB5</i> (-4.54693) | <i>APCDD1</i> ; <i>B2M</i> (5.50578); <i>CAMK2N1</i> ; <i>CaMKII</i> ; <i>CAND1</i> (4.88027); <i>CDK5R25.19751</i> ; <i>CDKN1B</i> (5.86977); <i>Cg</i> ; <i>COPS3</i> ; <i>CYB5R3</i> (4.95904); <i>DAZ2</i> ; <i>FOXF1</i> (11.6103); <i>H3F3A/H3F3B</i> (4.83763); <i>HGFAC</i> (4.58898); <i>Histone h3</i> ; <i>HLCS</i> (6.7314); <i>HOXA11</i> ; <i>KPNA4</i> ; <i>LMX1B</i> ; <i>NFκB</i> (complex); <i>ORC2</i> ; <i>OSGIN1</i> ; <i>PNPT1</i> ; <i>RNF7</i> ; <i>RNU7-1</i> ; <i>SACS</i> (6.79406); <i>SLC32A1</i> ; <i>ST8SIA1</i> ; <i>TP63</i> ; <i>UBA3</i> ; <i>UHMK1</i> ; <i>WNT3</i> ; <i>WNT7A</i> 8.74141); <i>ZIC1</i> ; <i>ZNF212</i> (5.56576) |
