# Supplementary material
Source: PubMed Central journal article supplement (PMC4028366)
Supplement: NIHMS545812-supplement-401_2013_1218_MOESM29_ESM.pdf [file NIHMS545812-supplement-401_2013_1218_MOESM29_ESM.pdf]

**File: ESM\_26 (Online Resource 26)**

**Manuscript Title:** Comparative Multidimensional Molecular Analyses of Pediatric Diffuse Intrinsic Pontine Glioma Reveals Distinct Molecular

**Journal:** Acta Neuropathologica

**Authors:** Amanda M. Saratsis, Madhuri Kambhampati, Kendall Snyder, Sridevi Yadavilli , Joe Devaney, Brennan Harmon, Jordan Hall, Eric H. Raabe, Ping An, Melanie Weingart, Brian Rood, Suresh Magge, Roger J. Packer, Javad Nazarian

**Corresponding Author:**

Javad Nazarian, Children's National Medical Center, Center for Genetic Medicine

111 Michigan Ave., NW, Washington DC, 20010

Phone: 202-476-6022

Fax: 202-476-6014

Email: [JNazarian@CNMC.org](mailto:JNazarian@CNMC.org)

## Online Resource 26

| Gene     | Methylation Probe (Fold Change Subgroup 1 vs. 2)                                                                                                                                                                                                                                                                                                                                                                                                                                                                                                     | Gene Exp. |        | Protein Exp. |        |
|----------|------------------------------------------------------------------------------------------------------------------------------------------------------------------------------------------------------------------------------------------------------------------------------------------------------------------------------------------------------------------------------------------------------------------------------------------------------------------------------------------------------------------------------------------------------|-----------|--------|--------------|--------|
|          |                                                                                                                                                                                                                                                                                                                                                                                                                                                                                                                                                      | 1         | 2      | 1            | 2      |
| ACE      | cg02125271 (-5.78); cg02546416 (-1.63); cg06246630 (-2.24E+09); cg07035499 (-2.22); cg10407847 (-15.58); cg24723140 (-2.56); cg26181929 (-1.09); cg26351776 (-13.30)                                                                                                                                                                                                                                                                                                                                                                                 | 29.27     | 3.72   | -            | -      |
| AGT      | cg07737236 (3.53); cg23792952 (1.23)                                                                                                                                                                                                                                                                                                                                                                                                                                                                                                                 | -0.09     | 2.86   | 4.00         | 5.17   |
| ARID2    | cg10294822 (1.71); cg24373369 (1.20)                                                                                                                                                                                                                                                                                                                                                                                                                                                                                                                 | -5.86     | 5.58   | -            | -      |
| C6orf115 | cg00119986 (1.11); cg02017814 (1.63); cg04264070 (1.33); cg06471073 (1.58); cg17373442 (1.10); cg22504528 (4.16)                                                                                                                                                                                                                                                                                                                                                                                                                                     | -4.65     | 3.17   | -            | -      |
| CARD8    | cg16304412 (1.08)                                                                                                                                                                                                                                                                                                                                                                                                                                                                                                                                    | -3.89     | 6.84   | -            | -      |
| CDH11    | cg00803816 (1.53); cg01000422 (1.21); cg01133890 (53.90); cg02261765 (3.38); cg02462933 (1.03); cg03101422 (1.15); cg03986395 (1.35); cg04218035 (1.75); cg05211050 (1.21); cg06444730 (2.19); cg08319130 (1.69); cg08487038 (1.75); cg09551938 (3.51); cg10502206 (3.94); cg12081897 (3.12)                                                                                                                                                                                                                                                         | -4.74     | 3.34   | -            | -      |
| CELSR1   | cg00238818 (2.36); cg01390135 (1.18); cg02271707 (1.96); cg03776087 (2.22); cg03909097 (2.88); cg04533485 (1.67); cg06584121 (79.81); cg07260128 (1.40); cg11619740 (1.35); cg12160233 (1.24); cg12349350 (1.30); cg12695615 (6.45); cg12885203 (1.46); cg13928709 (2.15); cg15425276 (2.67); cg15542608 (1.97); cg16000739 (2.37); cg16658862 (1.69); cg17765437 (1.72); cg18065337 (1.55); cg19005991 (15.07); cg20457594 (6.56); cg21500126 (1.52); cg22051399 (1.03); cg22635328 (1.46); cg24662789 (1.78); cg26271840 (1.84); cg27416435 (1.13) | -4.92     | 13.75  | -            | -      |
| CLPB     | cg01770948 (1.63); cg04591469 (1.15); cg12599336 (4.41); cg13210763 (2.43); cg20499825 (1.77); cg21041888 (9.91); cg21534264 (7.76); cg22333733 (1.36); cg25553916 (3.93)                                                                                                                                                                                                                                                                                                                                                                            | -16.08    | 16.35  | 0.00         | 0.00   |
| COL1A2   | cg04102126 (2.27); cg09128169 (2.25); cg17794320 (1.05); cg22095041 (1.24); cg27393640 (2.18)                                                                                                                                                                                                                                                                                                                                                                                                                                                        | -9.68     | 8.34   | 0.33         | -0.63  |
| CP       | cg06044794 (1.40); cg06494844 (6.21)                                                                                                                                                                                                                                                                                                                                                                                                                                                                                                                 | 10.60     | 192.70 | 0.00         | T Only |
| ERBB2    | cg02107110 (-2.75459); cg09004566 (-10.5192)                                                                                                                                                                                                                                                                                                                                                                                                                                                                                                         | 0.25      | -0.26  | -            | -      |
| FGF2     | cg04120680 (1.49); cg04534058 (1.73); cg11908799 (7.54); cg15491950 (3.79); cg15949380 (1.96); cg19378624 (1.11)                                                                                                                                                                                                                                                                                                                                                                                                                                     | -2.36     | 3.24   | -            | -      |
| GLIPR1   | cg14733680 (3.21)                                                                                                                                                                                                                                                                                                                                                                                                                                                                                                                                    | -6.43     | 29.47  | -            | -      |
| HIST1H4A | cg04147479 (-1.29); cg12235572 (-2.39); cg12312086 (-168.42); cg19363128 (-1.36); cg22191895 (-1.51)                                                                                                                                                                                                                                                                                                                                                                                                                                                 | 21.49     | -2.62  | 1.77         | 2.15   |
| LAMB1    | cg00907218 (1.89); cg02137984 (3.34); cg03183601 (28.45); cg06565620 (1.97); cg09959084 (3.28); cg10154971 (1.18); cg14218343 (1.54); cg16991886 (2.09); cg23497683 (2.02); cg27311590 (1.27)                                                                                                                                                                                                                                                                                                                                                        | -3.93     | 48.58  | 0.00         | 0.00   |
| LAMC1    | cg00675156 (65.62); cg04748923 (1.40); cg07145366 (1.59); cg07559303 (1.62); cg08296263 (1.38); cg11570484 (1.31); cg14018140 (1.12); cg14898433 (1.31); cg16318271 (1.78); cg21445527 (1.16); cg23966705 (1.43); cg24016056 (2.83)                                                                                                                                                                                                                                                                                                                  | -2.71     | 11.39  | 0.00         | T Only |
| LTBP2    | cg00432659 (1.10); cg03644271 (2.54); cg06537005 (1.29); cg07130466 (1.61); cg07888967 (2.58); cg08706873 (3.10); cg09802076 (3.09); cg09841001 (2.28); cg15792653 (2.09); cg16702362 (2.39); cg18254123 (1.30); cg18267532 (8.15); cg21499348 (1.23); cg27209457 (2.26); cg27241044 (46.42)                                                                                                                                                                                                                                                         | -33.69    | 36.44  | -            | -      |
| MYC      | cg00170438 (2.16); cg01095406 (1.88); cg03547086 (5.32); cg03651493 (1.14); cg10063233 (4.08); cg11395954 (1.43); cg12689996 (1.23); cg13807386 (316.24); cg16267263 (1.40); cg18081881 (1.29); cg18437365 (2.23); cg21089453 (6.04); cg23489390 (5.67)                                                                                                                                                                                                                                                                                              | -0.30     | 28.72  | -            | -      |
| NOX4     | cg07285807 (1.29); cg13115952 (2.29)                                                                                                                                                                                                                                                                                                                                                                                                                                                                                                                 | -6.28     | 18.58  | -            | -      |
| PCDH18   | cg07076850 (2.15); cg21878500 (1.01)                                                                                                                                                                                                                                                                                                                                                                                                                                                                                                                 | -2.65     | 7.30   | -            | -      |
| PDGFC    | cg02299328 (4.44); cg04626915 (2.06); cg12168275 (1.49); cg14104036 (6.65); cg16725225 (1.51); cg19936585 (2.88); cg21887097 (1.35)                                                                                                                                                                                                                                                                                                                                                                                                                  | -3.78     | 5.63   | -            | -      |
| PRDM1    | cg02211646 (1.08); cg05402891 (1.25); cg20067526 (2.62); cg25273233 (1.22); cg27605701 (1.20)                                                                                                                                                                                                                                                                                                                                                                                                                                                        | -0.67     | 25.47  | -            | -      |
| RNASEL   | cg07423602 (3.92); cg11814087 (1.06); cg13918235 (1.02); cg14167385 (7.35E28)                                                                                                                                                                                                                                                                                                                                                                                                                                                                        | -3.94     | 4.18   | -            | -      |
| SLPI     | cg08038761 (1.16); cg08962767 (1.47); cg13587875 (4.63); cg24683061 (2.06); cg25083484 (3.73)                                                                                                                                                                                                                                                                                                                                                                                                                                                        | 4.65      | 15.70  | -            | -      |
| SRF      | cg06219726 (1.50); cg07879070 (3.75); cg08498465 (1.67); cg21330034 (3.66); cg23397013 (1.04)                                                                                                                                                                                                                                                                                                                                                                                                                                                        | -3.38     | 2.53   | -            | -      |
| STMN1    | cg06749854 (6.30); cg26114452 (3.89)                                                                                                                                                                                                                                                                                                                                                                                                                                                                                                                 | -1.72     | -0.58  | -3.02        | 0.29   |
| TAP2     | cg27044023 (203.89)                                                                                                                                                                                                                                                                                                                                                                                                                                                                                                                                  | -1.91     | 1.99   | -            | -      |
| TNC      | cg14341520 (4.16); cg14395444 (1.52); cg14569778 (1.11); cg22447799 (1.91); cg22460148 (7.15)                                                                                                                                                                                                                                                                                                                                                                                                                                                        | -1.01     | 51.80  | 7.38         | 26.97  |
| TNF      | cg03287340 (1.37); cg04636307 (7.83); cg04684152 (1.09); cg11208869 (1.02); cg13378400 (1.55); cg22581831 (1.98)                                                                                                                                                                                                                                                                                                                                                                                                                                     | -19.02    | -4.22  | -            | -      |
