# Supplementary material
Source: PubMed Central journal article supplement (PMC4028366)
Supplement: NIHMS545812-supplement-401_2013_1218_MOESM30_ESM.pdf [file NIHMS545812-supplement-401_2013_1218_MOESM30_ESM.pdf]

Corresponding Author:

Javad Nazarian, Children’s National Medical Center, Center for Genetic Medicine  
 111 Michigan Ave., NW, Washington DC, 20010  
 Phone: 202-476-6022 Fax: 202-476-6014  
 Email: JNazarian@CNMC.org

| Probeset ID | UCSC_REFGENE_NAME           | p-value (H3.3 Status) | p-value (M vs. W) | Ratio (M vs. W) | Fold-Change (M vs. W) | Fold-Change (M vs. W) (Description) | F (H3.3 Status) | SS (H3.3 Status) | SS (Error) | F(Error) |
|-------------|-----------------------------|-----------------------|-------------------|-----------------|-----------------------|-------------------------------------|-----------------|------------------|------------|----------|
| cg09672255  | ZNF879                      | 3.32E-09              | 9.68E-10          | 0.20776         | -4.81315              | M down vs W                         | 93.796          | 21.5555          | 1.72359    | 1        |
| cg10309386  | BEND7;BEND7                 | 1.14E-05              | 2.68E-06          | 0.17614         | -5.67735              | M down vs W                         | 26.722          | 25.2928          | 7.09887    | 1        |
| cg20299670  | BCAN                        | 1.90E-05              | 4.41E-06          | 6.95241         | 6.95241               | M up vs W                           | 24.467          | 31.4196          | 9.63122    | 1        |
| cg06377353  | GINS1                       | 2.52E-05              | 6.30E-06          | 0.16936         | -5.90461              | M down vs W                         | 23.2716         | 26.6569          | 8.59102    | 1        |
| cg18778857  | LOC642846                   | 2.96E-05              | 5.07E-05          | 0.31217         | -3.20339              | M down vs W                         | 22.6275         | 16.2856          | 5.39794    | 1        |
| cg02380521  | FCHO1;FCHO1;FCHO1;FCHO1     | 4.54E-05              | 3.72E-05          | 28.7944         | 28.7944               | M up vs W                           | 20.9502         | 118.448          | 42.4032    | 1        |
| cg08395784  | PCGF3                       | 7.44E-05              | 1.75E-05          | 0.14202         | -7.04126              | M down vs W                         | 19.1396         | 31.7547          | 12.4433    | 1        |
| cg22142142  | GABARAPL3                   | 7.98E-05              | 4.20E-05          | 6.58253         | 6.58253               | M up vs W                           | 18.8933         | 34.3704          | 13.6439    | 1        |
| cg05593887  | MAGI2                       | 0.0001                | 2.41E-05          | 93.0226         | 93.0226               | M up vs W                           | 18.0578         | 171.341          | 71.1635    | 1        |
| cg04922606  | FAM120B                     | 0.00012               | 7.21E-05          | 0.07281         | -13.7346              | M down vs W                         | 17.5316         | 68.4221          | 29.2708    | 1        |
| cg14056849  | LOC169834                   | 0.00013               | 7.01E-05          | 4.2284          | 4.2284                | M up vs W                           | 17.2898         | 20.3261          | 8.81708    | 1        |
| cg01543583  | C14orf149                   | 0.00015               | 0.00018           | 11.2729         | 11.2729               | M up vs W                           | 16.769          | 67.2511          | 30.0782    | 1        |
| cg11702988  | ATP11A;ATP11A               | 0.00016               | 0.00014           | 4.26377         | 4.26377               | M up vs W                           | 16.4686         | 22.464           | 10.2304    | 1        |
| cg25124058  | RMST                        | 0.00017               | 0.00282           | 0.18332         | -5.45484              | M down vs W                         | 16.379          | 61.736           | 28.2691    | 1        |
| cg02623234  | WDR60                       | 0.00018               | 6.14E-05          | 3.62475         | 3.62475               | M up vs W                           | 16.2428         | 14.8448          | 6.85446    | 1        |
| cg01320969  | SUV420H1;SUV420H1           | 0.00019               | 0.0008            | 4.18262         | 4.18262               | M up vs W                           | 17.7428         | 28.111           | 10.2983    | 1        |
| cg05638648  | COL18A1;COL18A1;COL18A1     | 0.00022               | 9.50E-05          | 6.84766         | 6.84766               | M up vs W                           | 15.5736         | 34.6119          | 16.6685    | 1        |
| cg13815695  | LOC253724                   | 0.00024               | 0.00028           | 0.03103         | -32.2245              | M down vs W                         | 15.3333         | 138.369          | 67.6804    | 1        |
| cg26376809  | USP13                       | 0.00026               | 7.29E-05          | 0.22052         | -4.53481              | M down vs W                         | 16.6188         | 17.0314          | 6.66136    | 1        |
| cg05890457  | ARHGEF10                    | 0.00028               | 7.89E-05          | 0.11544         | -8.66285              | M down vs W                         | 14.8736         | 40.1308          | 20.236     | 1        |
| cg04990378  | C20orf166;MIR133A2          | 0.00028               | 0.00011           | 13.2701         | 13.2701               | M up vs W                           | 14.83           | 61.4727          | 31.0887    | 1        |
| cg11812810  | TTC9                        | 0.00031               | 0.0001            | 14.9178         | 14.9178               | M up vs W                           | 18.423          | 51.6276          | 15.4129    | 1        |
| cg11963755  | SMYD2                       | 0.00031               | 0.00012           | 3.98626         | 3.98626               | M up vs W                           | 14.4976         | 17.5314          | 9.06941    | 1        |
| cg13160627  | FAM20C                      | 0.00035               | 0.00014           | 4.94729         | 4.94729               | M up vs W                           | 14.2023         | 23.7105          | 12.5212    | 1        |
| cg27160931  | ZFYVE28                     | 0.00035               | 0.00047           | 0.08952         | -11.1702              | M down vs W                         | 14.7861         | 65.1326          | 30.8349    | 1        |
| cg16954525  | MS4A4A;MS4A4A               | 0.00036               | 0.00036           | 0.11416         | -8.75935              | M down vs W                         | 14.0976         | 52.6544          | 28.0124    | 1        |
| cg24923430  | MFHAS1                      | 0.0004                | 0.00012           | 4.69418         | 4.69418               | M up vs W                           | 13.8169         | 20.7883          | 11.2842    | 1        |
| cg14852227  | ARHGAP24;ARHGAP24           | 0.00041               | 0.0002            | 3.05229         | 3.05229               | M up vs W                           | 13.718          | 11.9179          | 6.51585    | 1        |
| cg14351440  | MCF2;MCF2                   | 0.00042               | 0.00048           | 5.08082         | 5.08082               | M up vs W                           | 13.6541         | 30.5426          | 16.7766    | 1        |
| cg02614045  | DOCK2                       | 0.00045               | 0.00243           | 3.6449          | 3.6449                | M up vs W                           | 14.0288         | 28.7029          | 14.322     | 1        |
| cg24694947  | C13orf16                    | 0.00047               | 0.00018           | 4.04886         | 4.04886               | M up vs W                           | 13.3093         | 17.8319          | 10.0486    | 1        |
| cg09104660  | NDUFA4L2                    | 0.00048               | 0.00013           | 3.2302          | 3.2302                | M up vs W                           | 13.2948         | 11.7587          | 6.63343    | 1        |
| cg25307521  | KIAA1026;KIAA1026;KIAA1026; | 0.00048               | 0.00013           | 3.22081         | 3.22081               | M up vs W                           | 13.2942         | 11.6632          | 6.57986    | 1        |
| cg10327440  | CDC42BPA;CDC42BPA           | 0.00048               | 0.00113           | 0.06826         | -14.65                | M down vs W                         | 13.8561         | 93.2233          | 47.0956    | 1        |
| cg16699528  | GATS;GATS;PVRIG;GATS;GATS   | 0.00053               | 0.00036           | 7.46211         | 7.46211               | M up vs W                           | 13.5685         | 38.9374          | 20.0878    | 1        |
| cg15549821  | PLEKHA4;PLEKHA4             | 0.00055               | 0.00015           | 3.12431         | 3.12431               | M up vs W                           | 12.9027         | 11.0319          | 6.41255    | 1        |
| cg14068657  | NCRNA00092                  | 0.00055               | 0.00017           | 3.35693         | 3.35693               | M up vs W                           | 12.9013         | 12.7519          | 7.41316    | 1        |
| cg20704148  | SLCO2B1;SLCO2B1             | 0.00061               | 0.00266           | 3.5782          | 3.5782                | M up vs W                           | 12.6232         | 26.4531          | 15.717     | 1        |
| cg03088219  | GPM6A;GPM6A;GPM6A           | 0.00063               | 0.0002            | 5.31402         | 5.31402               | M up vs W                           | 12.5357         | 24.5608          | 14.6946    | 1        |
| cg16706559  | CASP9;CASP9                 | 0.00064               | 0.00384           | 3.60958         | 3.60958               | M up vs W                           | 21.1103         | 21.5013          | 4.07409    | 1        |
| cg13573375  | PIAS4                       | 0.00071               | 0.00064           | 0.11444         | -8.73804              | M down vs W                         | 12.2379         | 51.9462          | 31.8354    | 1        |
| cg10496082  | DUOX1;DUOX1;DUOX1           | 0.00074               | 0.004             | 0.18385         | -5.43915              | M down vs W                         | 14.9131         | 40.6839          | 15.0043    | 1        |
| cg18852414  | SMYD2                       | 0.00076               | 0.00046           | 4.66217         | 4.66217               | M up vs W                           | 12.0488         | 23.9435          | 14.9041    | 1        |
| cg23764766  | ERC1;ERC1;ERC1;ERC1;ERC1    | 0.00077               | 0.00025           | 6.89251         | 6.89251               | M up vs W                           | 12.0047         | 32.7716          | 20.4743    | 1        |



| Probeset ID | UCSC_REFGENE_NAME                                                         | p-value<br>(H3.3<br>Status) | p-value<br>(M vs.<br>W) | Ratio (M<br>vs. W) | Fold-<br>Change (M<br>vs. W) | Fold-Change (M<br>vs. W)<br>(Description) | F (H3.3<br>Status) | SS (H3.3<br>Status) | SS (Error) | F(Error) |
|-------------|---------------------------------------------------------------------------|-----------------------------|-------------------------|--------------------|------------------------------|-------------------------------------------|--------------------|---------------------|------------|----------|
| cg18624102  | FBXO27<br>SLC29A1;SLC29A1;SLC29A1;SLC29A1;SLC29A1;SLC29A1;SLC29A1;SLC29A1 | 0.00315                     | 0.00174                 | 10.5802            | 10.5802                      | M up vs W                                 | 8.66558            | 55.5827             | 48.1064    | 1        |
| cg14593314  | 1                                                                         | 0.00315                     | 0.00092                 | 3.39051            | 3.39051                      | M up vs W                                 | 9.66866            | 10.1677             | 6.30969    | 1        |
| cg16362786  | PDXK                                                                      | 0.00316                     | 0.00084                 | 3.23333            | 3.23333                      | M up vs W                                 | 8.65733            | 11.469              | 9.93582    | 1        |
| cg19621008  | LOC154822                                                                 | 0.00321                     | 0.00086                 | 5.56621            | 5.56621                      | M up vs W                                 | 8.62797            | 24.6216             | 21.4027    | 1        |
| cg08084984  | XYLT1<br>PCSK6;PCSK6;PCSK6;PCSK6;PCSK6                                    | 0.00322                     | 0.00137                 | 12.1806            | 12.1806                      | M up vs W                                 | 8.62203            | 58.4217             | 50.8189    | 1        |
| cg09908042  | K6;PCSK6;PCSK6;PCSK6                                                      | 0.00324                     | 0.00243                 | 5.16621            | 5.16621                      | M up vs W                                 | 8.6052             | 29.1898             | 25.4409    | 1        |
| cg22905012  | BRMS1;BRMS1                                                               | 0.00327                     | 0.00089                 | 0.20807            | -4.80614                     | M down vs W                               | 8.58376            | 20.6657             | 18.0565    | 1        |
| cg22807402  | SLC25A19;SLC25A19;SLC25A19                                                | 0.00334                     | 0.00092                 | 3.1476             | 3.1476                       | M up vs W                                 | 8.53919            | 11.0424             | 9.69856    | 1        |
| cg24106636  | NHLH2;NHLH2                                                               | 0.00338                     | 0.00104                 | 0.05129            | -19.4962                     | M down vs W                               | 8.51774            | 76.1206             | 67.0253    | 1        |
| cg16527629  | SPDEF                                                                     | 0.0034                      | 0.00093                 | 3.07712            | 3.07712                      | M up vs W                                 | 8.50161            | 10.6                | 9.35114    | 1        |
| cg01788113  | PRSS50                                                                    | 0.00354                     | 0.00148                 | 3.01096            | 3.01096                      | M up vs W                                 | 8.4191             | 11.3142             | 10.0791    | 1        |
| cg08598654  | DLX6AS                                                                    | 0.00355                     | 0.00099                 | 0.32418            | -3.08473                     | M down vs W                               | 8.4127             | 10.6844             | 9.52523    | 1        |
| cg11314617  | MSC                                                                       | 0.00358                     | 0.00096                 | 0.16822            | -5.94471                     | M down vs W                               | 8.39444            | 26.5037             | 23.6797    | 1        |
| cg22371972  | SLC17A6                                                                   | 0.0037                      | 0.00162                 | 0.06681            | -14.9671                     | M down vs W                               | 8.32477            | 68.9515             | 62.1202    | 1        |
| cg16995742  | COPS8;COPS8                                                               | 0.00371                     | 0.00112                 | 0.16631            | -6.01298                     | M down vs W                               | 8.31616            | 27.6099             | 24.9002    | 1        |
| cg15411554  | ADAMTS16                                                                  | 0.00382                     | 0.0014                  | 0.32772            | -3.05136                     | M down vs W                               | 8.25862            | 11.2124             | 10.1824    | 1        |
| cg11229715  | CUL3                                                                      | 0.00382                     | 0.0052                  | 0.13724            | -7.28672                     | M down vs W                               | 8.50446            | 47.6936             | 39.2564    | 1        |
| cg02772880  | HYDIN;HYDIN                                                               | 0.00387                     | 0.00177                 | 0.07279            | -13.7382                     | M down vs W                               | 8.22903            | 65.4316             | 59.6348    | 1        |
| cg07480176  | CASD1                                                                     | 0.00388                     | 0.00178                 | 0.15426            | -6.48255                     | M down vs W                               | 8.22123            | 33.2839             | 30.3639    | 1        |
| cg11113469  | DLX6AS                                                                    | 0.00411                     | 0.00113                 | 0.30469            | -3.28207                     | M down vs W                               | 8.10413            | 11.8483             | 10.9651    | 1        |
| cg06429466  | TRPV6;TRPV6                                                               | 0.00425                     | 0.00116                 | 3.29895            | 3.29895                      | M up vs W                                 | 8.03457            | 11.9223             | 11.1291    | 1        |
| cg19900989  | SETBP1;SETBP1<br>C7orf50;C7orf50;GPR146;C7orf                             | 0.00428                     | 0.00115                 | 3.50713            | 3.50713                      | M up vs W                                 | 8.02011            | 13.1098             | 12.2596    | 1        |
| cg20603222  | 50                                                                        | 0.0043                      | 0.00141                 | 3.0289             | 3.0289                       | M up vs W                                 | 8.01049            | 10.7403             | 10.0559    | 1        |
| cg04583232  | SLC17A6                                                                   | 0.00433                     | 0.00214                 | 0.30425            | -3.28679                     | M down vs W                               | 7.99576            | 13.7677             | 12.9141    | 1        |
| cg17671604  | SPTBN4                                                                    | 0.00436                     | 0.0042                  | 4.48323            | 4.48323                      | M up vs W                                 | 7.98067            | 26.3303             | 24.7444    | 1        |
| cg07353620  | C19orf30;MIR7-3                                                           | 0.00441                     | 0.0015                  | 3.37382            | 3.37382                      | M up vs W                                 | 7.95754            | 13.0618             | 12.3108    | 1        |
| cg09289202  | STK25                                                                     | 0.00445                     | 0.00318                 | 5.10988            | 5.10988                      | M up vs W                                 | 7.93689            | 28.6086             | 27.0338    | 1        |
| cg26680317  | IQGAP2                                                                    | 0.0046                      | 0.00132                 | 0.20788            | -4.81059                     | M down vs W                               | 7.87194            | 20.8761             | 19.8897    | 1        |
| cg16178271  | MAD1L1;MAD1L1;MAD1L1                                                      | 0.00461                     | 0.00131                 | 6.11078            | 6.11078                      | M up vs W                                 | 7.86707            | 27.6618             | 26.3712    | 1        |
| cg06870118  | TTLL3                                                                     | 0.00463                     | 0.00126                 | 3.18471            | 3.18471                      | M up vs W                                 | 7.85591            | 11.1902             | 10.6832    | 1        |
| cg24105081  | CACNA2D4                                                                  | 0.00473                     | 0.00171                 | 6.48365            | 6.48365                      | M up vs W                                 | 7.81423            | 31.3481             | 30.0875    | 1        |
| cg23427945  | HLA-B                                                                     | 0.0048                      | 0.00137                 | 3.92008            | 3.92008                      | M up vs W                                 | 7.78381            | 15.7636             | 15.1889    | 1        |
| cg14684457  | NFE2L3                                                                    | 0.00484                     | 0.00155                 | 3.39245            | 3.39245                      | M up vs W                                 | 7.76626            | 12.9621             | 12.5177    | 1        |
| cg24887265  | SIX2                                                                      | 0.00491                     | 0.00145                 | 0.12846            | -7.78425                     | M down vs W                               | 7.73963            | 35.8859             | 34.7748    | 1        |
| cg05730038  | MFSD6L                                                                    | 0.00502                     | 0.00136                 | 0.26873            | -3.72115                     | M down vs W                               | 7.69197            | 14.3759             | 14.0171    | 1        |
| cg18792536  | UPK3B;UPK3B                                                               | 0.00503                     | 0.00136                 | 0.17998            | -5.55617                     | M down vs W                               | 7.69015            | 24.4853             | 23.8799    | 1        |
| cg22466043  | CDC10L                                                                    | 0.00506                     | 0.02517                 | 4.50266            | 4.50266                      | M up vs W                                 | 9.39164            | 32.5774             | 17.3438    | 1        |
| cg13200664  | KCNK13                                                                    | 0.00513                     | 0.00139                 | 4.53572            | 4.53572                      | M up vs W                                 | 7.65079            | 19.0346             | 18.6594    | 1        |
| cg03196364  | BEST3;BEST3                                                               | 0.0052                      | 0.0016                  | 4.26722            | 4.26722                      | M up vs W                                 | 7.62194            | 18.1134             | 17.8236    | 1        |
| cg17196155  | XRCC2                                                                     | 0.00529                     | 0.00249                 | 0.05328            | -18.7685                     | M down vs W                               | 7.80075            | 77.0655             | 69.1547    | 1        |
| cg10974412  | TNS3                                                                      | 0.0053                      | 0.00187                 | 5.79518            | 5.79518                      | M up vs W                                 | 7.5847             | 27.4892             | 27.1822    | 1        |
| cg11620807  | IRS1                                                                      | 0.00552                     | 0.00229                 | 0.28934            | -3.45611                     | M down vs W                               | 7.50253            | 14.2983             | 14.2935    | 1        |
| cg04968806  | SLC6A5                                                                    | 0.00554                     | 0.00163                 | 0.24399            | -4.09849                     | M down vs W                               | 7.49547            | 16.9026             | 16.9129    | 1        |
| cg10592245  | KCNK2;KCNK2;KCNK2                                                         | 0.00555                     | 0.00174                 | 13.5455            | 13.5455                      | M up vs W                                 | 10.6533            | 34.0636             | 12.7899    | 1        |
| cg24454829  | SLC17A6                                                                   | 0.00562                     | 0.00406                 | 0.28674            | -3.48746                     | M down vs W                               | 7.46705            | 16.9119             | 16.9865    | 1        |
| cg18088486  | CUX1;CUX1;CUX1                                                            | 0.00562                     | 0.00154                 | 0.08635            | -11.5809                     | M down vs W                               | 7.46588            | 50.0548             | 50.2835    | 1        |
| cg03535793  | EFCAB4B;EFCAB4B;EFCAB4B<br>FXVD6;FXVD6;FXVD6;FXVD6;FXVD6                  | 0.00563                     | 0.00167                 | 3.69206            | 3.69206                      | M up vs W                                 | 7.46171            | 14.5289             | 14.6035    | 1        |
| cg14848289  | D6                                                                        | 0.00566                     | 0.00156                 | 3.12683            | 3.12683                      | M up vs W                                 | 7.45063            | 10.8595             | 10.9315    | 1        |
| cg18536148  | TBX4;TBX4                                                                 | 0.00578                     | 0.00192                 | 0.24518            | -4.07857                     | M down vs W                               | 7.40972            | 17.3182             | 17.5292    | 1        |
| cg14759043  | EFCAB4B;EFCAB4B;EFCAB4B                                                   | 0.00579                     | 0.00179                 | 3.57858            | 3.57858                      | M up vs W                                 | 7.40674            | 13.9853             | 14.1614    | 1        |
| cg05916744  | THY1                                                                      | 0.00588                     | 0.0259                  | 0.31683            | -3.15627                     | M down vs W                               | 8.96718            | 19.2567             | 10.7373    | 1        |
| cg09512004  | LOC154822                                                                 | 0.00591                     | 0.00178                 | 4.03647            | 4.03647                      | M up vs W                                 | 7.36556            | 16.6379             | 16.9416    | 1        |
| cg09502207  | TMEM71;TMEM71                                                             | 0.00594                     | 0.00399                 | 3.18866            | 3.18866                      | M up vs W                                 | 7.35708            | 14.2858             | 14.5633    | 1        |
| cg12492885  | C22orf45;C22orf45;UPB1                                                    | 0.00595                     | 0.00162                 | 0.23817            | -4.19863                     | M down vs W                               | 7.35204            | 17.1385             | 17.4835    | 1        |
| cg11075451  | GBP7                                                                      | 0.00604                     | 0.00169                 | 4.17781            | 4.17781                      | M up vs W                                 | 7.32126            | 17.1339             | 17.5522    | 1        |

| Probeset ID | UCSC_REFGENE_NAME                            | p-value<br>(H3.3<br>Status) | p-value<br>(M vs.<br>W) | Ratio (M<br>vs. W) | Fold-<br>Change (M<br>vs. W) | Fold-Change (M<br>vs. W)<br>(Description) | F (H3.3<br>Status) | SS (H3.3<br>Status) | SS (Error) | F(Error) |
|-------------|----------------------------------------------|-----------------------------|-------------------------|--------------------|------------------------------|-------------------------------------------|--------------------|---------------------|------------|----------|
| cg26589251  | ADAMTS17                                     | 0.00606                     | 0.00167                 | 0.19658            | -5.08705                     | M down vs W                               | 7.31669            | 22.0834             | 22.6367    | 1        |
| cg21945930  | DLX6AS                                       | 0.00607                     | 0.00239                 | 0.18582            | -5.38157                     | M down vs W                               | 7.31435            | 25.9519             | 26.6106    | 1        |
| cg09864245  | CD59;CD59;CD59;CD59                          | 0.00609                     | 0.00172                 | 4.37193            | 4.37193                      | M up vs W                                 | 7.30779            | 18.2726             | 18.7532    | 1        |
| cg01632188  | MIR1260                                      | 0.00622                     | 0.00179                 | 4.37577            | 4.37577                      | M up vs W                                 | 7.26353            | 18.3808             | 18.9792    | 1        |
| cg25979559  | NHLH2;NHLH2                                  | 0.00624                     | 0.00191                 | 0.04755            | -21.0295                     | M down vs W                               | 7.2588             | 79.4932             | 82.1347    | 1        |
| cg02768912  | SKI                                          | 0.00643                     | 0.00278                 | 3.05849            | 3.05849                      | M up vs W                                 | 7.19873            | 11.7357             | 12.2269    | 1        |
| cg17042243  | HRNBP3                                       | 0.00645                     | 0.00821                 | 4.14192            | 4.14192                      | M up vs W                                 | 7.19434            | 26.1215             | 27.2313    | 1        |
| cg09469554  | CLDN10;CLDN10;CLDN10                         | 0.00645                     | 0.00179                 | 0.10554            | -9.47503                     | M down vs W                               | 7.19405            | 42.2501             | 44.0469    | 1        |
| cg25709790  | DFNA5;DFNA5;DFNA5                            | 0.00647                     | 0.00194                 | 4.89646            | 4.89646                      | M up vs W                                 | 7.18743            | 21.5112             | 22.4467    | 1        |
| cg17535691  | TLX1NB                                       | 0.0065                      | 0.00186                 | 0.13076            | -7.64743                     | M down vs W                               | 7.17963            | 34.8275             | 36.3816    | 1        |
| cg18697636  | SLC9A3;SLC9A3                                | 0.00653                     | 0.03196                 | 0.25171            | -3.97284                     | M down vs W                               | 7.16975            | 40.6303             | 42.5018    | 1        |
| cg00585714  | GDF6                                         | 0.00655                     | 0.00218                 | 0.27996            | -3.57201                     | M down vs W                               | 7.16206            | 14.1852             | 14.8545    | 1        |
| cg16051083  | ZDHHC14;ZDHHC14                              | 0.00658                     | 0.00183                 | 4.85635            | 4.85635                      | M up vs W                                 | 7.34848            | 19.4225             | 18.5014    | 1        |
| cg08977311  | C3orf50                                      | 0.00664                     | 0.00189                 | 14.2705            | 14.2705                      | M up vs W                                 | 7.32957            | 59.23               | 56.5668    | 1        |
| cg03959986  | SMG6;SMG6;SRR                                | 0.00665                     | 0.00467                 | 3.79717            | 3.79717                      | M up vs W                                 | 7.13361            | 19.1861             | 20.1715    | 1        |
| cg14200569  | PRDM16;PRDM16                                | 0.0067                      | 0.0031                  | 3.87868            | 3.87868                      | M up vs W                                 | 7.11883            | 17.583              | 18.5244    | 1        |
| cg24077401  | FCGBP                                        | 0.0068                      | 0.02508                 | 0.30979            | -3.22802                     | M down vs W                               | 7.09074            | 26.1897             | 27.7013    | 1        |
| cg05387996  | MIR548H4;NOX5                                | 0.00685                     | 0.00209                 | 3.91197            | 3.91197                      | M up vs W                                 | 7.07732            | 15.9142             | 16.8646    | 1        |
| cg02368820  | PRDM16;PRDM16                                | 0.00686                     | 0.00193                 | 5.65072            | 5.65072                      | M up vs W                                 | 7.07256            | 25.1188             | 26.6368    | 1        |
| cg21249371  | KDM2B;KDM2B                                  | 0.00688                     | 0.00202                 | 4.02338            | 4.02338                      | M up vs W                                 | 7.0675             | 16.4148             | 17.4193    | 1        |
| cg26365090  | TOX2;TOX2;TOX2;TOX2                          | 0.00696                     | 0.04431                 | 3.07993            | 3.07993                      | M up vs W                                 | 7.0441             | 30.8023             | 32.7959    | 1        |
| cg22696546  | CNST;CNST                                    | 0.00697                     | 0.0063                  | 0.22917            | -4.36358                     | M down vs W                               | 7.04144            | 25.277              | 26.9231    | 1        |
| cg12531767  | TAZ;TAZ;TAZ;TAZ;TAZ                          | 0.00708                     | 0.00349                 | 30.2859            | 30.2859                      | M up vs W                                 | 8.03029            | 91.6696             | 62.7851    | 1        |
| cg09434500  | GRIK5                                        | 0.00709                     | 0.00209                 | 7.06469            | 7.06469                      | M up vs W                                 | 7.00854            | 32.3949             | 34.6665    | 1        |
|             | COL11A2;COL11A2;COL11A2;CO                   |                             |                         |                    |                              |                                           |                    |                     |            |          |
| cg13703714  | L11A2                                        | 0.0071                      | 0.00205                 | 3.2055             | 3.2055                       | M up vs W                                 | 7.00562            | 11.4306             | 12.2372    | 1        |
| cg14044167  | NDRG1;NDRG1                                  | 0.00712                     | 0.00497                 | 4.66344            | 4.66344                      | M up vs W                                 | 7.00143            | 25.5546             | 27.3743    | 1        |
| cg18658556  | SORCS2                                       | 0.00715                     | 0.00409                 | 0.23136            | -4.32234                     | M down vs W                               | 6.99386            | 21.7884             | 23.3652    | 1        |
| cg02322894  | PRNT;PRNT;PRNT                               | 0.00716                     | 0.0024                  | 3.96526            | 3.96526                      | M up vs W                                 | 6.99095            | 16.6329             | 17.844     | 1        |
| cg18438853  | NHLH2;NHLH2                                  | 0.00738                     | 0.00259                 | 0.17796            | -5.61939                     | M down vs W                               | 6.93204            | 26.4317             | 28.5973    | 1        |
| cg17820365  | GDF6                                         | 0.00752                     | 0.00287                 | 0.13638            | -7.33239                     | M down vs W                               | 6.89442            | 36.0304             | 39.1951    | 1        |
| cg24849373  | TSNARE1                                      | 0.00754                     | 0.00595                 | 3.49749            | 3.49749                      | M up vs W                                 | 6.88949            | 17.5459             | 19.1008    | 1        |
| cg00065905  | NHLH2;NHLH2                                  | 0.00756                     | 0.00245                 | 0.12893            | -7.75607                     | M down vs W                               | 6.88462            | 36.4118             | 39.6665    | 1        |
| cg19691778  | GDF6                                         | 0.00761                     | 0.0025                  | 0.15548            | -6.43185                     | M down vs W                               | 6.87218            | 30.1949             | 32.9534    | 1        |
| cg11916054  | PROP1                                        | 0.00765                     | 0.00254                 | 0.3236             | -3.0902                      | M down vs W                               | 6.86269            | 11.1183             | 12.1508    | 1        |
| cg26985912  | LOC100133091                                 | 0.00766                     | 0.0022                  | 0.16158            | -6.18885                     | M down vs W                               | 7.25337            | 23.7954             | 21.3239    | 1        |
| cg17468459  | TGFBR3                                       | 0.00768                     | 0.00245                 | 3.66898            | 3.66898                      | M up vs W                                 | 6.85487            | 14.6044             | 15.9789    | 1        |
| cg10788927  | COL6A1                                       | 0.00785                     | 0.00218                 | 3.33104            | 3.33104                      | M up vs W                                 | 6.81249            | 12.055              | 13.2716    | 1        |
| cg22935921  | DNAJA4;DNAJA4                                | 0.00788                     | 0.00245                 | 7.43183            | 7.43183                      | M up vs W                                 | 6.80605            | 34.5135             | 38.0326    | 1        |
| cg04843821  | C10orf68                                     | 0.00802                     | 0.01609                 | 4.97425            | 4.97425                      | M up vs W                                 | 6.94788            | 39.7835             | 40.0819    | 1        |
|             | C10orf110;C10orf110;C10orf11                 |                             |                         |                    |                              |                                           |                    |                     |            |          |
| cg12421087  | 0;C10orf110                                  | 0.00803                     | 0.00594                 | 0.16826            | -5.94329                     | M down vs W                               | 6.77024            | 34.927              | 38.6917    | 1        |
| cg07475885  | C2orf89                                      | 0.00811                     | 0.0024                  | 0.12881            | -7.76364                     | M down vs W                               | 6.75067            | 35.5538             | 39.5003    | 1        |
| cg10513852  | MYF5                                         | 0.0082                      | 0.0041                  | 0.31717            | -3.15286                     | M down vs W                               | 6.73027            | 12.9113             | 14.3879    | 1        |
| cg18847598  | ASAM                                         | 0.0082                      | 0.00231                 | 0.16221            | -6.1649                      | M down vs W                               | 6.72974            | 27.6501             | 30.8149    | 1        |
| cg24142603  | MSC                                          | 0.00823                     | 0.00817                 | 0.24493            | -4.08274                     | M down vs W                               | 6.72364            | 23.8827             | 26.6404    | 1        |
| cg02485328  | EBF1                                         | 0.00824                     | 0.00229                 | 0.16329            | -6.12392                     | M down vs W                               | 6.7206             | 27.3491             | 30.5208    | 1        |
| cg02474195  | SNRK;SNRK                                    | 0.00825                     | 0.0023                  | 3.27992            | 3.27992                      | M up vs W                                 | 6.71928            | 11.7593             | 13.1256    | 1        |
| cg01449846  | CAPN5                                        | 0.00828                     | 0.00282                 | 0.25097            | -3.98455                     | M down vs W                               | 7.33944            | 13.4808             | 11.0206    | 1        |
| cg03900028  | ZNF117                                       | 0.0083                      | 0.00231                 | 0.08787            | -11.3798                     | M down vs W                               | 6.70789            | 49.2641             | 55.0816    | 1        |
| cg16345566  | HLA-DQB1                                     | 0.0083                      | 0.00275                 | 0.22376            | -4.4691                      | M down vs W                               | 6.70775            | 19.5715             | 21.8831    | 1        |
| cg21723903  | EFCAB4B;EFCAB4B;EFCAB4B                      | 0.00834                     | 0.00251                 | 7.48163            | 7.48163                      | M up vs W                                 | 6.69799            | 34.4329             | 38.5559    | 1        |
| cg14669379  | ADORA3                                       | 0.00842                     | 0.00333                 | 3.46653            | 3.46653                      | M up vs W                                 | 6.6794             | 14.158              | 15.8974    | 1        |
| cg22418829  | BTNL9                                        | 0.0085                      | 0.00489                 | 0.20941            | -4.77522                     | M down vs W                               | 6.66195            | 24.9396             | 28.0769    | 1        |
|             | SNORD115-5;SNORD115-12;SNORD115-10;SNORD115- |                             |                         |                    |                              |                                           |                    |                     |            |          |
| cg02966053  | 8;SNORD115-9                                 | 0.0086                      | 0.0026                  | 3.15178            | 3.15178                      | M up vs W                                 | 6.64104            | 11.2154             | 12.666     | 1        |
| cg23365293  | HLA-DRB5                                     | 0.00862                     | 0.00278                 | 0.23981            | -4.17004                     | M down vs W                               | 6.6365             | 17.664              | 19.9624    | 1        |
| cg09157668  | KIAA1239                                     | 0.00863                     | 0.00787                 | 0.3058             | -3.27009                     | M down vs W                               | 6.63361            | 16.5126             | 18.6693    | 1        |
| cg02469909  | C22orf45;C22orf45;UPB1                       | 0.00878                     | 0.00247                 | 0.20863            | -4.7932                      | M down vs W                               | 6.6004             | 20.477              | 23.2679    | 1        |
| cg00594128  | ZNF879;ZNF879                                | 0.00881                     | 0.003                   | 4.97184            | 4.97184                      | M up vs W                                 | 11.528             | 9.17854             | 2.38859    | 1        |



| Probeset ID | UCSC_REFGENE_NAME                                                                                                             | p-value (H3.3 Status) | p-value (M vs. W) | Ratio (M vs. W) | Fold-Change (M vs. W) | Fold-Change (M vs. W) (Description) | F (H3.3 Status) | SS (H3.3 Status) | SS (Error) | F(Error) |
|-------------|-------------------------------------------------------------------------------------------------------------------------------|-----------------------|-------------------|-----------------|-----------------------|-------------------------------------|-----------------|------------------|------------|----------|
| cg06087421  | TAL1;TAL1                                                                                                                     | 0.01223               | 0.0035            | 0.28517         | -3.5067               | M down vs W                         | 5.99216         | 13.1173          | 16.418     | 1        |
| cg03022891  | TNNT3;TNNT3;TNNT3;TNNT3                                                                                                       | 0.01225               | 0.00427           | 0.19151         | -5.22162              | M down vs W                         | 5.98955         | 24.0854          | 30.1593    | 1        |
| cg26748794  | FAM38A                                                                                                                        | 0.01233               | 0.00361           | 0.24608         | -4.06381              | M down vs W                         | 5.97732         | 16.4932          | 20.6947    | 1        |
| cg00704664  | CDH4                                                                                                                          | 0.01234               | 0.02938           | 3.07101         | 3.07101               | M up vs W                           | 5.97508         | 21.6054          | 27.1194    | 1        |
| cg17610929  | ACCN4;ACCN4;ACCN4;ACCN4                                                                                                       | 0.01235               | 0.01888           | 5.45627         | 5.45627               | M up vs W                           | 8.78382         | 25.3358          | 10.0953    | 1        |
| cg01084740  | TMEM30B;TMEM30B<br>HSD11B1L;HSD11B1L;HSD11B1L<br>;HSD11B1L;C19orf70;HSD11B1L                                                  | 0.01236               | 0.0044            | 0.26442         | -3.78191              | M down vs W                         | 5.97335         | 15.7009          | 19.7137    | 1        |
| cg24348823  | ;HSD11B1L                                                                                                                     | 0.01248               | 0.00409           | 3.66893         | 3.66893               | M up vs W                           | 7.41974         | 8.58621          | 5.20745    | 1        |
| cg23757365  | C21orf2                                                                                                                       | 0.01249               | 0.00369           | 3.27391         | 3.27391               | M up vs W                           | 5.95387         | 11.8249          | 14.8956    | 1        |
| cg21272897  | HSPG2                                                                                                                         | 0.01258               | 0.0036            | 0.0865          | -11.5603              | M down vs W                         | 5.94064         | 49.8929          | 62.9893    | 1        |
| cg15839752  | GPR162;GPR162                                                                                                                 | 0.01263               | 0.00444           | 3.09701         | 3.09701               | M up vs W                           | 5.93451         | 11.2909          | 14.2693    | 1        |
| cg22802296  | PBX1                                                                                                                          | 0.01265               | 0.00695           | 4.62626         | 4.62626               | M up vs W                           | 5.93061         | 23.724           | 30.0019    | 1        |
| cg07083172  | SNORD115-19;SNORD115-17;SNORD115-18;SNORD115-19;SNORD115-17;SNORD115-18<br>CCDC159;TMEM205;TMEM205;<br>TMEM205;TMEM205;TMEM20 | 0.01268               | 0.00422           | 3.46315         | 3.46315               | M up vs W                           | 5.92764         | 13.4244          | 16.9853    | 1        |
| cg06724266  | 5;TMEM205                                                                                                                     | 0.0127                | 0.01965           | 3.89576         | 3.89576               | M up vs W                           | 8.68558         | 16.3954          | 6.60682    | 1        |
| cg05136263  | SIX2                                                                                                                          | 0.01278               | 0.00561           | 0.22741         | -4.39731              | M down vs W                         | 5.91345         | 20.6986          | 26.2519    | 1        |
| cg01120761  | CLEC4C;CLEC4C                                                                                                                 | 0.01284               | 0.00582           | 3.18312         | 3.18312               | M up vs W                           | 5.90418         | 12.7745          | 16.2273    | 1        |
| cg07861448  | MSC                                                                                                                           | 0.01303               | 0.00571           | 0.16991         | -5.88559              | M down vs W                         | 5.87895         | 29.6385          | 37.811     | 1        |
| cg06679534  | CXCR4                                                                                                                         | 0.01303               | 0.0046            | 4.87316         | 4.87316               | M up vs W                           | 5.87784         | 22.1788          | 28.2996    | 1        |
| cg08042322  | NT5DC3                                                                                                                        | 0.01323               | 0.00411           | 3.15961         | 3.15961               | M up vs W                           | 5.85109         | 11.275           | 14.4525    | 1        |
| cg01579206  | CSNK1A1;CSNK1A1                                                                                                               | 0.01326               | 0.00421           | 0.30795         | -3.24729              | M down vs W                         | 6.13989         | 10.1461          | 10.7412    | 1        |
| cg00919591  | BCR;BCR                                                                                                                       | 0.01329               | 0.00401           | 3.31964         | 3.31964               | M up vs W                           | 5.84258         | 12.1569          | 15.6056    | 1        |
| cg14220146  | WNK2                                                                                                                          | 0.0133                | 0.00397           | 3.46701         | 3.46701               | M up vs W                           | 5.84132         | 13.0211          | 16.7185    | 1        |
| cg05422174  | KIRREL3;KIRREL3                                                                                                               | 0.01341               | 0.00421           | 3.89811         | 3.89811               | M up vs W                           | 5.82694         | 15.8132          | 20.3535    | 1        |
| cg00502469  | RASA3                                                                                                                         | 0.01342               | 0.01025           | 4.97995         | 4.97995               | M up vs W                           | 5.82548         | 29.0343          | 37.3801    | 1        |
| cg16120147  | LYNX1;LYNX1                                                                                                                   | 0.01351               | 0.00739           | 3.92822         | 3.92822               | M up vs W                           | 5.81334         | 18.918           | 24.4069    | 1        |
| cg19092981  | TBX1;TBX1;TBX1                                                                                                                | 0.01353               | 0.00464           | 0.09909         | -10.0922              | M down vs W                         | 5.81091         | 46.8402          | 60.4555    | 1        |
| cg03175771  | PRR14                                                                                                                         | 0.01367               | 0.0166            | 3.58491         | 3.58491               | M up vs W                           | 5.79299         | 21.6377          | 28.0137    | 1        |
| cg27244972  | C21orf57                                                                                                                      | 0.01373               | 0.0121            | 0.32628         | -3.06486              | M down vs W                         | 5.785           | 14.8466          | 19.248     | 1        |
| cg04879211  | TNS3                                                                                                                          | 0.01374               | 0.00461           | 3.33249         | 3.33249               | M up vs W                           | 5.78366         | 12.6171          | 16.3613    | 1        |
| cg15564098  | EVX1                                                                                                                          | 0.01376               | 0.00502           | 0.09287         | -10.7672              | M down vs W                         | 5.78156         | 50.4063          | 65.3885    | 1        |
| cg15577010  | NMUR1                                                                                                                         | 0.01404               | 0.02193           | 4.3787          | 4.3787                | M up vs W                           | 5.87577         | 29.9838          | 35.7207    | 1        |
| cg21878369  | ZNF83                                                                                                                         | 0.01404               | 0.00602           | 3.04513         | 3.04513               | M up vs W                           | 5.74545         | 11.6204          | 15.1691    | 1        |
| cg16413687  | ALX1                                                                                                                          | 0.01405               | 0.00504           | 0.12931         | -7.73324              | M down vs W                         | 5.8747          | 34.6148          | 41.2453    | 1        |
| cg15448907  | TMEM132B                                                                                                                      | 0.01414               | 0.00423           | 0.20023         | -4.99434              | M down vs W                         | 5.73342         | 21.7731          | 28.4818    | 1        |
| cg12698737  | ANP32A                                                                                                                        | 0.01416               | 0.00418           | 4.77419         | 4.77419               | M up vs W                           | 6.01317         | 17.4654          | 18.8794    | 1        |
| cg13389958  | EVX1                                                                                                                          | 0.01436               | 0.01442           | 0.25296         | -3.95317              | M down vs W                         | 5.70646         | 23.4682          | 30.8442    | 1        |
| cg19297537  | HK1;HK1;HK1;HK1                                                                                                               | 0.01438               | 0.00439           | 6.5632          | 6.5632                | M up vs W                           | 5.70414         | 29.9624          | 39.3955    | 1        |
| cg22956547  | ZNF155;ZNF155                                                                                                                 | 0.01445               | 0.0223            | 0.19351         | -5.16783              | M down vs W                         | 5.69531         | 39.4161          | 51.9059    | 1        |
| cg17913670  | LOC154822                                                                                                                     | 0.01454               | 0.00427           | 3.92464         | 3.92464               | M up vs W                           | 5.68363         | 15.6399          | 20.638     | 1        |
| cg19032705  | SH3PXD2B                                                                                                                      | 0.01462               | 0.01291           | 3.16012         | 3.16012               | M up vs W                           | 5.67399         | 15.7206          | 20.7799    | 1        |
| cg16310958  | ABHD12;ABHD12                                                                                                                 | 0.01472               | 0.00437           | 0.13567         | -7.37088              | M down vs W                         | 5.66217         | 33.4819          | 44.3494    | 1        |
| cg10044466  | ADM                                                                                                                           | 0.01483               | 0.01455           | 3.80592         | 3.80592               | M up vs W                           | 5.92507         | 19.0374          | 20.8847    | 1        |
| cg23244463  | KCNB2                                                                                                                         | 0.01487               | 0.00675           | 3.28236         | 3.28236               | M up vs W                           | 5.64472         | 13.4717          | 17.8996    | 1        |
| cg27092191  | ZNF267                                                                                                                        | 0.01498               | 0.00438           | 0.22267         | -4.49096              | M down vs W                         | 5.63173         | 18.8469          | 25.0992    | 1        |
| cg03261800  | PAX5                                                                                                                          | 0.015                 | 0.00477           | 0.23427         | -4.26863              | M down vs W                         | 5.62987         | 18.0272          | 24.0155    | 1        |
| cg01538344  | TAF7L;TAF7L;TAF7L                                                                                                             | 0.01508               | 0.00553           | 0.14553         | -6.87159              | M down vs W                         | 5.62046         | 33.1791          | 44.2745    | 1        |
| cg00394180  | GDF6                                                                                                                          | 0.0151                | 0.00454           | 0.23318         | -4.28858              | M down vs W                         | 5.61827         | 17.8484          | 23.8264    | 1        |
| cg08304084  | SALL1;SALL1                                                                                                                   | 0.01529               | 0.00448           | 3.16468         | 3.16468               | M up vs W                           | 5.59646         | 11.093           | 14.866     | 1        |
| cg06869160  | GALNT4;WDR51B                                                                                                                 | 0.01529               | 0.00475           | 0.30206         | -3.31061              | M down vs W                         | 5.59572         | 12.1835          | 16.3296    | 1        |
| cg06544111  | EVX1                                                                                                                          | 0.01535               | 0.00638           | 0.12359         | -8.09161              | M down vs W                         | 5.58925         | 40.5567          | 54.4215    | 1        |
| cg01383753  | CLDN23                                                                                                                        | 0.01536               | 0.0092            | 0.31206         | -3.20447              | M down vs W                         | 5.58851         | 14.1388          | 18.9749    | 1        |
| cg01077501  | CALD1;CALD1;CALD1;CALD1;CA<br>LD1                                                                                             | 0.01541               | 0.00537           | 3.30672         | 3.30672               | M up vs W                           | 5.58184         | 12.5764          | 16.8982    | 1        |
| cg00510011  | GPR98;GPR98;GPR98                                                                                                             | 0.01551               | 0.0046            | 0.32504         | -3.07655              | M down vs W                         | 5.83959         | 9.20811          | 10.2495    | 1        |

| Probeset ID | UCSC_REFGENE_NAME                                                                                               | p-value (H3.3 Status) | p-value (M vs. W) | Ratio (M vs. W) | Fold-Change (M vs. W) | Fold-Change (M vs. W) (Description) | F (H3.3 Status) | SS (H3.3 Status) | SS (Error) | F(Error) |
|-------------|-----------------------------------------------------------------------------------------------------------------|-----------------------|-------------------|-----------------|-----------------------|-------------------------------------|-----------------|------------------|------------|----------|
| cg01636599  | FGF22                                                                                                           | 0.01565               | 0.00478           | 3.09651         | 3.09651               | M up vs W                           | 5.55573         | 10.7991          | 14.5784    | 1        |
| cg15267232  | GATA3;GATA3                                                                                                     | 0.01566               | 0.00775           | 0.21495         | -4.65219              | M down vs W                         | 5.55424         | 23.1662          | 31.2817    | 1        |
| cg21028319  | TM2D2;TM2D2;TM2D2;TM2D2                                                                                         | 0.01569               | 0.00529           | 0.13221         | -7.56351              | M down vs W                         | 5.55054         | 35.635           | 48.1508    | 1        |
| cg19659741  | ADAM5P                                                                                                          | 0.01577               | 0.00919           | 0.20786         | -4.81091              | M down vs W                         | 5.6636          | 23.8218          | 29.4428    | 1        |
| cg05293216  | FANCG                                                                                                           | 0.01587               | 0.00608           | 3.57949         | 3.57949               | M up vs W                           | 5.53127         | 14.7118          | 19.9481    | 1        |
| cg02126788  | NHLH2;NHLH2                                                                                                     | 0.01589               | 0.00471           | 0.19903         | -5.0244               | M down vs W                         | 5.52887         | 21.8301          | 29.6129    | 1        |
| cg09368046  | EPN2;EPN2;EPN2                                                                                                  | 0.016                 | 0.0053            | 0.21913         | -4.56354              | M down vs W                         | 6.78047         | 12.418           | 8.24149    | 1        |
| cg06842781  | NDNL2;FAM189A1                                                                                                  | 0.01604               | 0.01604           | 3.6342          | 3.6342                | M up vs W                           | 7.84117         | 12.1299          | 18.5635    | 1        |
| cg21646199  | NHLH2;NHLH2                                                                                                     | 0.01605               | 0.00474           | 0.20429         | -4.8949               | M down vs W                         | 5.51176         | 21.1014          | 28.7133    | 1        |
| cg12751277  | TSNAX-DISC1;DISC1;DISC1;TSNAX-DISC1;DISC1;DISC1;DISC1;DISC1;TSNAX-DISC1;TSNAX-DISC1;RNF185;RNF185;RNF185;RNF185 | 0.01606               | 0.00532           | 4.10554         | 4.10554               | M up vs W                           | 5.51092         | 17.2658          | 23.4976    | 1        |
| cg01253545  | 5;RNF185;RNF185;RNF185                                                                                          | 0.01606               | 0.00483           | 0.21561         | -4.63795              | M down vs W                         | 5.94498         | 15.8399          | 15.9864    | 1        |
| cg24999518  | NHLH2;NHLH2                                                                                                     | 0.01607               | 0.00469           | 0.19516         | -5.12395              | M down vs W                         | 5.50951         | 22.2624          | 30.3053    | 1        |
| cg13462557  | INADL                                                                                                           | 0.01613               | 0.00818           | 12.4227         | 12.4227               | M up vs W                           | 5.50248         | 62.7123          | 85.4782    | 1        |
| cg17799295  | CRB3;CRB3                                                                                                       | 0.01616               | 0.0047            | 0.3079          | -3.24776              | M down vs W                         | 5.49949         | 11.5543          | 15.7574    | 1        |
| cg17527589  | ADAM3A;ADAM3A;ADAM3A                                                                                            | 0.01635               | 0.00493           | 0.08863         | -11.2833              | M down vs W                         | 5.47996         | 49.4242          | 67.6432    | 1        |
| cg02257714  | CACNA1H;CACNA1H                                                                                                 | 0.01635               | 0.00681           | 0.3301          | -3.02938              | M down vs W                         | 5.59791         | 10.6326          | 13.2957    | 1        |
| cg09866143  | SLC12A8                                                                                                         | 0.01638               | 0.00485           | 8.91588         | 8.91588               | M up vs W                           | 5.47686         | 40.0644          | 54.8642    | 1        |
| cg09378783  | EGFR;EGFR;EGFR;EGFR                                                                                             | 0.01639               | 0.00503           | 3.41505         | 3.41505               | M up vs W                           | 5.47529         | 12.7599          | 17.4784    | 1        |
| cg18900649  | PRDM13                                                                                                          | 0.01641               | 0.00497           | 7.80115         | 7.80115               | M up vs W                           | 5.47267         | 35.5546          | 48.7256    | 1        |
| cg16079774  | SLC17A6                                                                                                         | 0.01649               | 0.00618           | 0.29624         | -3.37567              | M down vs W                         | 5.46446         | 13.2956          | 18.2483    | 1        |
| cg14859088  | PACSIN2                                                                                                         | 0.01651               | 0.00701           | 3.02325         | 3.02325               | M up vs W                           | 5.46287         | 11.4282          | 15.6899    | 1        |
| cg13316188  | BTBD9;BTBD9;BTBD9                                                                                               | 0.01651               | 0.0049            | 3.22386         | 3.22386               | M up vs W                           | 5.4627          | 11.4745          | 15.7539    | 1        |
| cg15658824  | SORBS3;SORBS3                                                                                                   | 0.01681               | 0.00722           | 4.04211         | 4.04211               | M up vs W                           | 5.43182         | 18.2845          | 25.2463    | 1        |
| cg01233934  | PRDM13                                                                                                          | 0.01686               | 0.02957           | 3.76822         | 3.76822               | M up vs W                           | 5.42681         | 27.5093          | 38.0186    | 1        |
| cg18612589  | CLDN7                                                                                                           | 0.0169                | 0.0052            | 0.27264         | -3.66784              | M down vs W                         | 5.4227          | 14.2925          | 19.7676    | 1        |
| cg15725440  | PRDM13                                                                                                          | 0.01694               | 0.00716           | 3.66141         | 3.66141               | M up vs W                           | 5.41806         | 15.704           | 21.7384    | 1        |
| cg08276328  | MAGEC1                                                                                                          | 0.01699               | 0.00643           | 3.34328         | 3.34328               | M up vs W                           | 5.41304         | 13.1231          | 18.1827    | 1        |
| cg04373359  | TMEM30B                                                                                                         | 0.0171                | 0.00598           | 0.23731         | -4.21388              | M down vs W                         | 5.40246         | 18.1876          | 25.249     | 1        |
| cg17370981  | ATP4B                                                                                                           | 0.01719               | 0.02234           | 0.19113         | -5.23207              | M down vs W                         | 5.50878         | 35.5625          | 45.1893    | 1        |
| cg16836675  | TOM1L1                                                                                                          | 0.0172                | 0.00792           | 3.13793         | 3.13793               | M up vs W                           | 5.39236         | 12.5301          | 17.4276    | 1        |
| cg05456789  | KLHL35                                                                                                          | 0.0172                | 0.00568           | 3.32598         | 3.32598               | M up vs W                           | 5.3917          | 12.477           | 17.3559    | 1        |
| cg06365535  | TBX4                                                                                                            | 0.01724               | 0.00819           | 0.19366         | -5.16361              | M down vs W                         | 5.38833         | 26.0832          | 36.3051    | 1        |
| cg14924160  | SUGT1L1                                                                                                         | 0.01727               | 0.01874           | 3.52831         | 3.52831               | M up vs W                           | 5.38496         | 20.5272          | 28.5896    | 1        |
| cg06376520  | MYF5;MYF5                                                                                                       | 0.01729               | 0.00562           | 0.30874         | -3.23895              | M down vs W                         | 5.38323         | 11.8763          | 16.5462    | 1        |
| cg19003884  | PRDM13                                                                                                          | 0.0173                | 0.00659           | 4.28079         | 4.28079               | M up vs W                           | 5.38169         | 19.0807          | 26.5911    | 1        |
| cg00901687  | MYCBPAP                                                                                                         | 0.01748               | 0.00549           | 4.04999         | 4.04999               | M up vs W                           | 5.36463         | 16.6392          | 23.2624    | 1        |
| cg02421172  | MAD1L1;MAD1L1;MAD1L1                                                                                            | 0.01753               | 0.0068            | 3.53837         | 3.53837               | M up vs W                           | 5.35953         | 14.4932          | 20.2815    | 1        |
| cg18346634  | OPRD1                                                                                                           | 0.01755               | 0.01775           | 0.21118         | -4.7352               | M down vs W                         | 5.35721         | 30.4307          | 42.6024    | 1        |
| cg25817701  | MAD1L1;MAD1L1;MAD1L1                                                                                            | 0.01759               | 0.00753           | 3.73782         | 3.73782               | M up vs W                           | 5.35404         | 16.2721          | 22.7942    | 1        |
| cg10088790  | GSTO2                                                                                                           | 0.01759               | 0.00706           | 0.30583         | -3.26985              | M down vs W                         | 5.35334         | 12.8709          | 18.0321    | 1        |
| cg26069044  | NRGN;NRGN                                                                                                       | 0.01763               | 0.00544           | 0.08486         | -11.7841              | M down vs W                         | 5.34935         | 51.4819          | 72.1796    | 1        |
| cg26799209  | MSC                                                                                                             | 0.01775               | 0.00576           | 0.1232          | -8.11695              | M down vs W                         | 5.33847         | 37.6606          | 52.9092    | 1        |
| cg01237565  | BRF1;BTBD6;BRF1                                                                                                 | 0.01777               | 0.01234           | 3.70475         | 3.70475               | M up vs W                           | 5.33634         | 18.8532          | 26.4974    | 1        |
| cg06464008  | TLX1NB                                                                                                          | 0.01777               | 0.00615           | 0.19069         | -5.24406              | M down vs W                         | 5.33599         | 24.0471          | 33.7994    | 1        |
| cg05092371  | CTLA4;CTLA4                                                                                                     | 0.01778               | 0.0052            | 0.31123         | -3.21302              | M down vs W                         | 5.33548         | 11.3437          | 15.9457    | 1        |
| cg14768367  | DHODH                                                                                                           | 0.01778               | 0.00895           | 0.18499         | -5.40565              | M down vs W                         | 10.0307         | 9.22299          | 2.29868    | 1        |
| cg20161976  | ALOX12B                                                                                                         | 0.0178                | 0.00542           | 0.16505         | -6.05861              | M down vs W                         | 5.333           | 27.337           | 38.4451    | 1        |
| cg01427458  | OPCML                                                                                                           | 0.0178                | 0.00558           | 3.86089         | 3.86089               | M up vs W                           | 5.33287         | 15.506           | 21.8072    | 1        |
| cg02446378  | ZNF17                                                                                                           | 0.01782               | 0.0055            | 0.29137         | -3.43203              | M down vs W                         | 5.93912         | 9.25068          | 8.56671    | 1        |
| cg16290866  | GDF6                                                                                                            | 0.01792               | 0.00565           | 0.20832         | -4.80034              | M down vs W                         | 5.32191         | 20.9511          | 29.5257    | 1        |
| cg07568141  | MRPS18A                                                                                                         | 0.01792               | 0.00656           | 3.14441         | 3.14441               | M up vs W                           | 5.32186         | 11.693           | 16.4787    | 1        |
| cg24903893  | EBF1                                                                                                            | 0.01792               | 0.00532           | 0.20566         | -4.86238              | M down vs W                         | 5.32142         | 20.9032          | 29.4609    | 1        |
| cg10526897  | PCDHA2;PCDHA1;PCDHA1;PCDHA3                                                                                     | 0.01806               | 0.00534           | 3.47805         | 3.47805               | M up vs W                           | 5.30855         | 12.9695          | 18.3235    | 1        |

| Probeset ID | UCSC_REFGENE_NAME                       | p-value (H3.3 Status) | p-value (M vs. W) | Ratio (M vs. W) | Fold-Change (M vs. W) | Fold-Change (M vs. W) (Description) | F (H3.3 Status) | SS (H3.3 Status) | SS (Error) | F(Error) |
|-------------|-----------------------------------------|-----------------------|-------------------|-----------------|-----------------------|-------------------------------------|-----------------|------------------|------------|----------|
| cg10701801  | OSBPL9;OSBPL9;OSBPL9;OSBPL9             | 0.01822               | 0.00549           | 0.13667         | -7.31717              | M down vs W                         | 5.40466         | 30.941           | 40.0741    | 1        |
| cg27544000  | ESPNP                                   | 0.01824               | 0.00633           | 0.17711         | -5.64628              | M down vs W                         | 5.29196         | 26.2586          | 37.2149    | 1        |
| cg24385632  | PLEKHA7                                 | 0.01833               | 0.00643           | 4.32427         | 4.32427               | M up vs W                           | 5.28362         | 18.8511          | 26.7587    | 1        |
| cg01564135  | EVX1                                    | 0.0184                | 0.01361           | 0.20899         | -4.78489              | M down vs W                         | 5.27701         | 27.5743          | 39.1903    | 1        |
| cg17839758  | C21orf29;KRTAP12-3                      | 0.0184                | 0.00544           | 0.14827         | -6.74441              | M down vs W                         | 5.27664         | 30.4083          | 43.221     | 1        |
| cg14312018  | C17orf68;PFAS                           | 0.0184                | 0.0091            | 3.44496         | 3.44496               | M up vs W                           | 6.11692         | 10.2169          | 8.35137    | 1        |
| cg23841760  | SNORD115-7                              | 0.01852               | 0.01516           | 4.82731         | 4.82731               | M up vs W                           | 5.26537         | 28.9237          | 41.1989    | 1        |
| cg19790321  | C2orf74                                 | 0.0187                | 0.00563           | 0.21875         | -4.57134              | M down vs W                         | 5.2489          | 19.3679          | 27.6742    | 1        |
| cg01911981  | ADAM3A;ADAM3A;ADAM3A                    | 0.01888               | 0.00571           | 0.19173         | -5.21567              | M down vs W                         | 5.23263         | 22.9077          | 32.8339    | 1        |
| cg01406536  | TMEM132B                                | 0.01889               | 0.00564           | 0.22137         | -4.51737              | M down vs W                         | 5.2319          | 19.0209          | 27.2667    | 1        |
| cg03388789  | ZIC4;ZIC4;ZIC4                          | 0.01889               | 0.00567           | 6.54236         | 6.54236               | M up vs W                           | 5.23176         | 29.558           | 42.373     | 1        |
| cg11412582  | HERC2                                   | 0.01892               | 0.00618           | 0.31794         | -3.14528              | M down vs W                         | 5.22932         | 11.289           | 16.1909    | 1        |
| cg15845365  | MYO10                                   | 0.01893               | 0.00561           | 3.64052         | 3.64052               | M up vs W                           | 5.22886         | 13.9329          | 19.9846    | 1        |
| cg24137511  | MAST3                                   | 0.01916               | 0.00691           | 3.41829         | 3.41829               | M up vs W                           | 5.20757         | 13.388           | 19.2815    | 1        |
| cg27079096  | OR52B4                                  | 0.01922               | 0.00586           | 7.77606         | 7.77606               | M up vs W                           | 5.20306         | 35.4004          | 51.0282    | 1        |
| cg01765077  | WDR66                                   | 0.01922               | 0.00858           | 4.609           | 4.609                 | M up vs W                           | 5.20286         | 22.1531          | 31.934     | 1        |
| cg17896927  | RGMA;RGMA;RGMA;RGMA;RGMA;RGMA           | 0.01927               | 0.00616           | 3.16289         | 3.16289               | M up vs W                           | 5.19805         | 11.3188          | 16.3313    | 1        |
| cg03043709  | MAD1L1;MAD1L1;MAD1L1                    | 0.01942               | 0.00653           | 3.98931         | 3.98931               | M up vs W                           | 5.18496         | 16.5955          | 24.0052    | 1        |
| cg08294044  | KCNB2                                   | 0.01951               | 0.00669           | 4.21645         | 4.21645               | M up vs W                           | 5.17745         | 18.0654          | 26.1694    | 1        |
| cg03586390  | NRXN2;NRXN2                             | 0.01957               | 0.01007           | 3.7889          | 3.7889                | M up vs W                           | 5.17237         | 17.6416          | 25.5806    | 1        |
| cg01647917  | GZMM                                    | 0.01963               | 0.04477           | 3.76447         | 3.76447               | M up vs W                           | 5.167           | 31.5332          | 45.771     | 1        |
| cg10941566  | CABP7                                   | 0.0198                | 0.00768           | 3.07127         | 3.07127               | M up vs W                           | 5.15197         | 11.4113          | 16.612     | 1        |
| cg15838288  | WNT3A                                   | 0.01982               | 0.01205           | 0.15337         | -6.52027              | M down vs W                         | 5.15043         | 36.9956          | 53.8726    | 1        |
| cg25350306  | AFF3;AFF3                               | 0.01983               | 0.0059            | 4.42658         | 4.42658               | M up vs W                           | 5.15015         | 18.4682          | 26.8947    | 1        |
| cg11068352  | OR6W1P                                  | 0.01988               | 0.00829           | 3.29418         | 3.29418               | M up vs W                           | 5.14599         | 13.1872          | 19.2197    | 1        |
| cg01591343  | WDR27                                   | 0.01988               | 0.00639           | 0.32337         | -3.09245              | M down vs W                         | 5.14567         | 10.8948          | 15.8795    | 1        |
| cg16404371  | SLC2A14                                 | 0.01991               | 0.00813           | 0.19898         | -5.02552              | M down vs W                         | 5.14321         | 24.0236          | 35.032     | 1        |
| cg01957222  | TPO;TPO;TPO;TPO                         | 0.01991               | 0.00678           | 0.2916          | -3.42936              | M down vs W                         | 5.14309         | 13.2141          | 19.2697    | 1        |
| cg27518014  | LOC100287834                            | 0.01991               | 0.00596           | 9.29302         | 9.29302               | M up vs W                           | 5.14276         | 41.5462          | 60.5894    | 1        |
| cg00748875  | PCDHA1;PCDHA1;PCDHA2;PCDHA2             | 0.01993               | 0.00648           | 0.31566         | -3.16802              | M down vs W                         | 5.14102         | 11.4016          | 16.6333    | 1        |
| cg22149516  | SLCO4C1                                 | 0.02                  | 0.00608           | 0.26523         | -3.77039              | M down vs W                         | 5.13558         | 14.7957          | 21.6077    | 1        |
| cg22102688  | BTNL9                                   | 0.02001               | 0.01506           | 0.23072         | -4.33435              | M down vs W                         | 5.13499         | 24.4182          | 35.6644    | 1        |
| cg15461888  | AMPD3                                   | 0.02034               | 0.01287           | 0.2116          | -4.726                | M down vs W                         | 5.10741         | 25.7541          | 37.8187    | 1        |
| cg08453263  | PLEKHA7                                 | 0.02044               | 0.00614           | 3.959           | 3.959                 | M up vs W                           | 5.09909         | 15.8362          | 23.2928    | 1        |
| cg00706570  | MBP;MBP;MBP;MBP;MBP                     | 0.02046               | 0.01491           | 0.30294         | -3.30099              | M down vs W                         | 5.09711         | 16.0132          | 23.5622    | 1        |
| cg20864636  | GARNL3                                  | 0.02057               | 0.00765           | 3.26122         | 3.26122               | M up vs W                           | 5.08837         | 12.4937          | 18.4151    | 1        |
| cg12169700  | MAD1L1;MAD1L1;MAD1L1                    | 0.02076               | 0.00623           | 10.5076         | 10.5076               | M up vs W                           | 5.07303         | 46.2548          | 68.3834    | 1        |
| cg10452542  | FBXW8;FBXW8                             | 0.02085               | 0.0079            | 3.89911         | 3.89911               | M up vs W                           | 5.06555         | 16.6552          | 24.6596    | 1        |
| cg21016266  | WDR66;WDR66                             | 0.02095               | 0.0067            | 3.22599         | 3.22599               | M up vs W                           | 5.05748         | 11.6934          | 17.3407    | 1        |
| cg20592836  | TP53INP2                                | 0.02104               | 0.01288           | 10.5024         | 10.5024               | M up vs W                           | 5.04995         | 58.3907          | 86.7198    | 1        |
| cg26972832  | GPLD1                                   | 0.02113               | 0.02606           | 0.17473         | -5.72309              | M down vs W                         | 5.04323         | 41.9294          | 62.355     | 1        |
| cg16270385  | GLUD2                                   | 0.02132               | 0.00668           | 0.25711         | -3.88939              | M down vs W                         | 5.02798         | 15.6192          | 23.2985    | 1        |
| cg11253913  | CALD1;CALD1;CALD1;CALD1;CALD1;CA<br>LD1 | 0.02137               | 0.00651           | 4.75078         | 4.75078               | M up vs W                           | 5.02413         | 20.3775          | 30.4194    | 1        |
| cg08508814  | CDC20B;CDC20B;CDC20B;GPX8               | 0.0214                | 0.00892           | 0.32344         | -3.09176              | M down vs W                         | 5.02175         | 11.8162          | 17.6475    | 1        |
| cg23058037  | VIPR2                                   | 0.0215                | 0.00662           | 3.45442         | 3.45442               | M up vs W                           | 5.0143          | 12.9392          | 19.3535    | 1        |
| cg23629001  | PRPF8                                   | 0.02152               | 0.00919           | 6.55621         | 6.55621               | M up vs W                           | 6.98059         | 16.1894          | 8.11723    | 1        |
| cg26284685  | PRR20E;PRR20D;PRR20C;PRR20<br>B;PRR20A  | 0.02174               | 0.0081            | 3.07061         | 3.07061               | M up vs W                           | 4.99576         | 11.2544          | 16.896     | 1        |
| cg11843606  | RHBDD1;RHBDD1                           | 0.0218                | 0.00709           | 9.61573         | 9.61573               | M up vs W                           | 6.02997         | 25.6857          | 19.1685    | 1        |
| cg00254133  | NTSR1;NTSR1                             | 0.02183               | 0.0372            | 0.2959          | -3.37955              | M down vs W                         | 4.98881         | 23.5656          | 35.4277    | 1        |
| cg21148160  | PAPLN                                   | 0.02186               | 0.01164           | 3.32733         | 3.32733               | M up vs W                           | 4.98682         | 14.5521          | 21.8858    | 1        |
| cg06697407  | TSPAN9;TSPAN9                           | 0.02189               | 0.02867           | 3.72274         | 3.72274               | M up vs W                           | 4.98458         | 24.4813          | 36.8356    | 1        |
| cg11898646  | EBF1                                    | 0.02193               | 0.00662           | 0.31461         | -3.17852              | M down vs W                         | 4.98091         | 11.1867          | 16.8444    | 1        |
| cg18731327  | ZIC4;ZIC4;ZIC4                          | 0.02195               | 0.00737           | 4.09884         | 4.09884               | M up vs W                           | 4.97931         | 17.2054          | 25.9153    | 1        |
| cg03102879  | SCNN1B                                  | 0.02198               | 0.00688           | 0.18755         | -5.33197              | M down vs W                         | 5.07678         | 22.0614          | 30.4188    | 1        |
| cg14262439  | TMEM132B                                | 0.02199               | 0.00682           | 0.1323          | -7.55879              | M down vs W                         | 4.97644         | 34.5011          | 51.9967    | 1        |



| Probeset ID | UCSC_REFGENE_NAME      | p-value<br>(H3.3<br>Status) | p-value<br>(M vs.<br>W) | Ratio (M<br>vs. W) | Fold-<br>Change (M<br>vs. W) | Fold-Change (M<br>vs. W)<br>(Description) | F (H3.3<br>Status) | SS (H3.3<br>Status) | SS (Error) | F(Error) |
|-------------|------------------------|-----------------------------|-------------------------|--------------------|------------------------------|-------------------------------------------|--------------------|---------------------|------------|----------|
| cg20653012  | C2orf89                | 0.02212                     | 0.00867                 | 0.19343            | -5.16974                     | M down vs W                               | 4.96655            | 24.5223             | 37.0312    | 1        |
| cg02374745  | FBXO39;FBXO39          | 0.02226                     | 0.01262                 | 0.30033            | -3.32969                     | M down vs W                               | 4.95668            | 14.8899             | 22.5301    | 1        |
| cg18502142  | DLX6AS                 | 0.02227                     | 0.00754                 | 0.10196            | -9.80774                     | M down vs W                               | 4.95555            | 45.1783             | 68.3754    | 1        |
| cg19325477  | PRKCA                  | 0.02243                     | 0.01465                 | 3.26215            | 3.26215                      | M up vs W                                 | 4.94352            | 15.1299             | 22.9542    | 1        |
| cg24364535  | OPCML                  | 0.02247                     | 0.00702                 | 4.85432            | 4.85432                      | M up vs W                                 | 4.9405             | 21.0929             | 32.0205    | 1        |
|             | WDSUB1;WDSUB1;WDSUB1;W |                             |                         |                    |                              |                                           |                    |                     |            |          |
| cg07508773  | DSUB1;WDSUB1           | 0.0226                      | 0.00687                 | 4.75449            | 4.75449                      | M up vs W                                 | 5.14455            | 17.7083             | 22.374     | 1        |
| cg25933095  | DLC1;DLC1;DLC1         | 0.02261                     | 0.00794                 | 3.41943            | 3.41943                      | M up vs W                                 | 4.93039            | 13.2545             | 20.1625    | 1        |
| cg02849583  | FSTL1                  | 0.02263                     | 0.00682                 | 3.51512            | 3.51512                      | M up vs W                                 | 4.92919            | 13.2032             | 20.0892    | 1        |
| cg25382566  | CDCA5;ZFPL1;ZFPL1      | 0.02267                     | 0.01017                 | 0.31769            | -3.14768                     | M down vs W                               | 4.92639            | 12.4923             | 19.0184    | 1        |
| cg10911971  | EIF1B                  | 0.02267                     | 0.04456                 | 4.11494            | 4.11494                      | M up vs W                                 | 5.93903            | 24.7985             | 18.7898    | 1        |
| cg03603505  | CLIP1;CLIP1            | 0.02269                     | 0.00684                 | 3.29094            | 3.29094                      | M up vs W                                 | 4.92487            | 11.8526             | 18.0501    | 1        |
| cg08958618  | FGF14                  | 0.02275                     | 0.00764                 | 3.09189            | 3.09189                      | M up vs W                                 | 4.92041            | 11.0101             | 16.7824    | 1        |
| cg14530382  | SH2D3A                 | 0.02276                     | 0.00889                 | 0.18051            | -5.53984                     | M down vs W                               | 4.91953            | 26.593              | 40.542     | 1        |
| cg11625005  | TERT;TERT              | 0.02284                     | 0.00757                 | 0.18757            | -5.33142                     | M down vs W                               | 4.91338            | 24.1005             | 36.7881    | 1        |
| cg13174197  | GNL3;GNL3;GNL3;PBRM1   | 0.0229                      | 0.0229                  | 0.21439            | -4.66437                     | M down vs W                               | 6.98178            | 15.9467             | 25.1244    | 1        |
| cg26522157  | LMTK3                  | 0.02292                     | 0.00744                 | 4.03187            | 4.03187                      | M up vs W                                 | 4.90823            | 16.6152             | 25.3888    | 1        |
| cg18109665  | SRGAP3;SRGAP3          | 0.02296                     | 0.00685                 | 3.55688            | 3.55688                      | M up vs W                                 | 4.90515            | 13.4049             | 20.4962    | 1        |
| cg22379915  | KRT19                  | 0.02297                     | 0.00718                 | 0.12162            | -8.22216                     | M down vs W                               | 4.90468            | 37.4886             | 57.3257    | 1        |
| cg15972264  | NEDD9                  | 0.02322                     | 0.00928                 | 6.01963            | 6.01963                      | M up vs W                                 | 4.88658            | 29.4536             | 45.2058    | 1        |
| cg11035303  | ANO10                  | 0.02323                     | 0.00695                 | 0.27605            | -3.62249                     | M down vs W                               | 4.88565            | 13.7991             | 21.1831    | 1        |
| cg16592832  | C22orf45;C22orf45;UPB1 | 0.02324                     | 0.00699                 | 0.32987            | -3.03149                     | M down vs W                               | 4.88532            | 10.2623             | 15.7548    | 1        |
| cg08683938  | OPCML                  | 0.02333                     | 0.00757                 | 3.81999            | 3.81999                      | M up vs W                                 | 4.87879            | 15.3497             | 23.5966    | 1        |
| cg01013630  | SMUG1                  | 0.02334                     | 0.02334                 | 0.31018            | -3.2239                      | M down vs W                               | 7.14925            | 8.31853             | 11.6355    | 1        |
| cg25069807  | TK1                    | 0.02336                     | 0.00756                 | 4.83947            | 4.83947                      | M up vs W                                 | 4.87623            | 21.2233             | 32.6431    | 1        |
| cg08600378  | PRHOXNB                | 0.02338                     | 0.00721                 | 5.50363            | 5.50363                      | M up vs W                                 | 4.87481            | 24.4513             | 37.6188    | 1        |
| cg15705062  | KDM4B                  | 0.02346                     | 0.00728                 | 3.40659            | 3.40659                      | M up vs W                                 | 4.86927            | 12.6547             | 19.4918    | 1        |
| cg17342064  | ALOXE3;ALOXE3          | 0.02355                     | 0.00705                 | 0.14372            | -6.95791                     | M down vs W                               | 4.8633             | 31.3432             | 48.3364    | 1        |
| cg05037927  | C2orf74                | 0.02376                     | 0.00757                 | 0.22355            | -4.47319                     | M down vs W                               | 4.84821            | 19.0556             | 29.4783    | 1        |
| cg26354017  | PM20D1                 | 0.02382                     | 0.02578                 | 0.31075            | -3.21805                     | M down vs W                               | 4.84446            | 17.9976             | 27.8631    | 1        |
| cg01047778  | SHANK2                 | 0.02382                     | 0.00773                 | 3.5791             | 3.5791                       | M up vs W                                 | 4.84421            | 13.8871             | 21.5006    | 1        |
| cg09164580  | GDF6                   | 0.02383                     | 0.0095                  | 0.26326            | -3.7985                      | M down vs W                               | 4.84357            | 16.2622             | 25.181     | 1        |
| cg07244980  | CECR7                  | 0.02386                     | 0.01387                 | 5.17208            | 5.17208                      | M up vs W                                 | 4.84192            | 28.0682             | 43.4768    | 1        |
| cg18373354  | ST14;ST14              | 0.02393                     | 0.01048                 | 0.16712            | -5.98382                     | M down vs W                               | 4.83689            | 30.1556             | 46.7588    | 1        |
| cg21433768  | CYB5R2                 | 0.02398                     | 0.01061                 | 0.27965            | -3.57586                     | M down vs W                               | 4.83337            | 15.3496             | 23.8182    | 1        |
| cg13524588  | AES;AES;AES            | 0.02403                     | 0.00741                 | 0.27801            | -3.59704                     | M down vs W                               | 4.82978            | 13.7697             | 21.3825    | 1        |
| cg10640333  | OTX1                   | 0.0241                      | 0.00762                 | 0.25097            | -3.98459                     | M down vs W                               | 4.82507            | 16.1817             | 25.1526    | 1        |
| cg16817229  | MX1;MX1                | 0.02413                     | 0.01523                 | 0.14988            | -6.67217                     | M down vs W                               | 4.91703            | 36.0408             | 51.3086    | 1        |
| cg11930768  | CRELD1;CRELD1;CRELD1   | 0.02415                     | 0.00811                 | 0.28299            | -3.5337                      | M down vs W                               | 5.16013            | 11.0242             | 12.8185    | 1        |
| cg18297538  | TRIM31                 | 0.02415                     | 0.01635                 | 0.18445            | -5.42144                     | M down vs W                               | 5.02609            | 26.9864             | 34.9002    | 1        |
| cg19176453  | CDK6                   | 0.02433                     | 0.00824                 | 0.32763            | -3.0522                      | M down vs W                               | 5.77641            | 6.32323             | 4.92599    | 1        |
| cg21011139  | CYB5R2                 | 0.02436                     | 0.00852                 | 0.0771             | -12.9697                     | M down vs W                               | 4.80782            | 57.4341             | 89.5948    | 1        |
| cg14273219  | PPP1R3F                | 0.02448                     | 0.01303                 | 3.20621            | 3.20621                      | M up vs W                                 | 4.7998             | 13.6808             | 21.3772    | 1        |
| cg27052113  | SLC8A2                 | 0.02448                     | 0.00739                 | 0.16132            | -6.19891                     | M down vs W                               | 4.79966            | 27.7621             | 43.3814    | 1        |
| cg00836482  | NR112;NR112;NR112      | 0.02454                     | 0.01031                 | 0.14237            | -7.02377                     | M down vs W                               | 4.79519            | 35.2989             | 55.2098    | 1        |
| cg12301620  | IFT172;IFT172          | 0.02467                     | 0.02467                 | 0.26846            | -3.72502                     | M down vs W                               | 8.12591            | 7.99899             | 6.89066    | 1        |
| cg12562232  | IGF1R                  | 0.02467                     | 0.00741                 | 3.71534            | 3.71534                      | M up vs W                                 | 4.78657            | 14.3415             | 22.4715    | 1        |
| cg14998086  | TNS3                   | 0.02476                     | 0.00746                 | 3.38342            | 3.38342                      | M up vs W                                 | 4.78086            | 12.3815             | 19.4236    | 1        |
| cg06317507  | MGC34034;MGC34034      | 0.02491                     | 0.00822                 | 0.26261            | -3.80792                     | M down vs W                               | 4.77075            | 15.3342             | 24.1066    | 1        |
| cg18401451  | C21orf70               | 0.02493                     | 0.01432                 | 3.15916            | 3.15916                      | M up vs W                                 | 4.76984            | 13.703              | 21.5463    | 1        |
| cg04082461  | CYP26A1;CYP26A1        | 0.02497                     | 0.01148                 | 0.28933            | -3.45622                     | M down vs W                               | 4.76691            | 14.7335             | 23.181     | 1        |
| cg02893823  | KRT19;KRT19            | 0.02497                     | 0.00841                 | 0.15162            | -6.59531                     | M down vs W                               | 4.76678            | 30.7273             | 48.346     | 1        |
| cg11835342  | BUD13;BUD13            | 0.02506                     | 0.01235                 | 3.18772            | 3.18772                      | M up vs W                                 | 5.45128            | 7.17438             | 6.58045    | 1        |
| cg13251750  | SERPINA9;SERPINA9      | 0.02515                     | 0.00888                 | 6.12386            | 6.12386                      | M up vs W                                 | 4.75528            | 28.7955             | 45.4162    | 1        |
| cg21146592  | PRDM13                 | 0.02515                     | 0.0087                  | 3.92622            | 3.92622                      | M up vs W                                 | 4.75502            | 16.2935             | 25.6994    | 1        |
| cg06955954  | ATP4B                  | 0.0255                      | 0.02878                 | 0.16659            | -6.00261                     | M down vs W                               | 4.73294            | 43.2874             | 68.5949    | 1        |
| cg11749583  | GLI3                   | 0.02558                     | 0.00862                 | 0.16609            | -6.02091                     | M down vs W                               | 5.0537             | 22.2934             | 26.4678    | 1        |
| cg22836359  | GPR162;GPR162          | 0.02561                     | 0.01408                 | 7.10724            | 7.10724                      | M up vs W                                 | 4.72563            | 39.221              | 62.2472    | 1        |
| cg20183778  | ALKBH4;LRWD1           | 0.02566                     | 0.00821                 | 0.29112            | -3.43504                     | M down vs W                               | 5.4021             | 9.2512              | 8.5626     | 1        |
| cg23125449  | TMEM132B               | 0.0257                      | 0.00774                 | 0.26173            | -3.82067                     | M down vs W                               | 4.71989            | 14.9592             | 23.7705    | 1        |
| cg25900280  | TBX4                   | 0.02574                     | 0.00927                 | 0.14138            | -7.07299                     | M down vs W                               | 4.71728            | 33.762              | 53.6782    | 1        |



| Probeset ID                 | UCSC_REFGENE_NAME         | p-value<br>(H3.3<br>Status) | p-value<br>(M vs.<br>W) | Ratio (M<br>vs. W) | Fold-<br>Change (M<br>vs. W) | Fold-Change (M<br>vs. W)<br>(Description) | F (H3.3<br>Status) | SS (H3.3<br>Status) | SS (Error) | F(Error) |
|-----------------------------|---------------------------|-----------------------------|-------------------------|--------------------|------------------------------|-------------------------------------------|--------------------|---------------------|------------|----------|
| cg02403292                  | SLIT3                     | 0.02953                     | 0.01769                 | 3.76901            | 3.76901                      | M up vs W                                 | 4.57803            | 17.3443             | 26.5201    | 1        |
| cg05291429                  | SLC43A2                   | 0.02959                     | 0.00903                 | 7.06927            | 7.06927                      | M up vs W                                 | 4.4926             | 31.8554             | 53.1798    | 1        |
| cg01790628                  | SNCAIP                    | 0.0296                      | 0.00904                 | 3.69113            | 3.69113                      | M up vs W                                 | 4.49201            | 14.209              | 23.7237    | 1        |
| cg14422932                  | STK32B                    | 0.02973                     | 0.00955                 | 0.27699            | -3.61023                     | M down vs W                               | 4.48472            | 13.9598             | 23.3456    | 1        |
| cg04108811                  | SMYD3                     | 0.02983                     | 0.01868                 | 4.36878            | 4.36878                      | M up vs W                                 | 4.65783            | 20.4483             | 28.5355    | 1        |
| cg12716639                  | USP2;USP2                 | 0.02983                     | 0.00929                 | 3.91887            | 3.91887                      | M up vs W                                 | 4.4793             | 15.6345             | 26.1779    | 1        |
| cg02803914                  | APBB1IP                   | 0.02984                     | 0.00919                 | 0.2207             | -4.53108                     | M down vs W                               | 4.47928            | 19.07               | 31.9303    | 1        |
| cg04959815                  | CYB5R2                    | 0.02985                     | 0.01266                 | 0.12507            | -7.99586                     | M down vs W                               | 4.47823            | 40.2298             | 67.3757    | 1        |
| cg16059943                  | PRKCZ;PRKCZ               | 0.02987                     | 0.00975                 | 3.05579            | 3.05579                      | M up vs W                                 | 4.47727            | 10.6214             | 17.7921    | 1        |
| cg20771240                  | LOC100128239              | 0.02993                     | 0.00914                 | 4.98881            | 4.98881                      | M up vs W                                 | 4.47428            | 21.5119             | 36.0592    | 1        |
| cg19556774                  | SLC2A14                   | 0.02995                     | 0.01584                 | 0.28702            | -3.48403                     | M down vs W                               | 4.47333            | 15.6962             | 26.3163    | 1        |
| cg03075889                  | MAD1L1;MAD1L1;MAD1L1      | 0.02996                     | 0.00917                 | 6.26472            | 6.26472                      | M up vs W                                 | 4.4725             | 28.0589             | 47.0524    | 1        |
| cg27286614                  | MAD1L1;MAD1L1;MAD1L1      | 0.02997                     | 0.01087                 | 4.17033            | 4.17033                      | M up vs W                                 | 4.47219            | 17.9876             | 30.1659    | 1        |
| cg22871566                  | AEBP2;AEBP2               | 0.02997                     | 0.00919                 | 3.09519            | 3.09519                      | M up vs W                                 | 4.47208            | 10.6471             | 17.8559    | 1        |
| cg09864457                  | GRIK5                     | 0.03004                     | 0.00926                 | 3.0347             | 3.0347                       | M up vs W                                 | 4.46849            | 10.2939             | 17.2774    | 1        |
| cg16296902                  | CCL28                     | 0.03005                     | 0.00917                 | 0.33262            | -3.0064                      | M down vs W                               | 4.46772            | 10.0882             | 16.9351    | 1        |
| cg11440486                  | MYCBPAP                   | 0.03011                     | 0.00989                 | 3.28875            | 3.28875                      | M up vs W                                 | 4.46467            | 12.0891             | 20.308     | 1        |
| cg23830185                  | TNS1                      | 0.03013                     | 0.0092                  | 3.03906            | 3.03906                      | M up vs W                                 | 4.46361            | 10.2869             | 17.2846    | 1        |
| cg08268047                  | FMO2                      | 0.03014                     | 0.01585                 | 0.22445            | -4.45531                     | M down vs W                               | 4.54397            | 22.4433             | 34.574     | 1        |
| cg18199554                  | CCL28                     | 0.0303                      | 0.01404                 | 0.24653            | -4.05635                     | M down vs W                               | 4.45446            | 18.8308             | 31.7056    | 1        |
| cg03102729                  | GLUD2;GLUD2               | 0.0304                      | 0.00932                 | 0.15306            | -6.53333                     | M down vs W                               | 4.44919            | 29.3579             | 49.4887    | 1        |
| cg19772066                  | ZNF229                    | 0.03041                     | 0.01482                 | 3.38383            | 3.38383                      | M up vs W                                 | 4.44869            | 14.5322             | 24.4997    | 1        |
| cg05850457                  | HDAC4                     | 0.03057                     | 0.00936                 | 4.87426            | 4.87426                      | M up vs W                                 | 4.4404             | 20.9032             | 35.3063    | 1        |
| cg12114820                  | OSBPL8;OSBPL8             | 0.03062                     | 0.01392                 | 0.33331            | -3.00017                     | M down vs W                               | 4.7271             | 9.27363             | 11.7708    | 1        |
| cg09910635                  | TAC1;TAC1;TAC1;TAC1       | 0.03065                     | 0.00938                 | 0.27956            | -3.5771                      | M down vs W                               | 4.43612            | 13.5304             | 22.8754    | 1        |
| cg26307117                  | LTF                       | 0.0307                      | 0.01031                 | 0.15694            | -6.37172                     | M down vs W                               | 4.43395            | 29.458              | 49.828     | 1        |
| cg08148553                  | AP1M2                     | 0.03075                     | 0.01628                 | 0.21284            | -4.69828                     | M down vs W                               | 4.4311             | 24.1297             | 40.8415    | 1        |
| cg12097883                  | LOC146880;LOC146880       | 0.03088                     | 0.01006                 | 3.74467            | 3.74467                      | M up vs W                                 | 4.42424            | 14.8214             | 25.1253    | 1        |
| cg08961187                  | MDGA1                     | 0.03138                     | 0.0097                  | 3.01377            | 3.01377                      | M up vs W                                 | 4.39874            | 10.1614             | 17.3255    | 1        |
| cg05690644                  | GDF6                      | 0.03143                     | 0.0158                  | 0.2647             | -3.7779                      | M down vs W                               | 4.39657            | 17.4751             | 29.8103    | 1        |
| cg08214847                  | T                         | 0.03143                     | 0.0137                  | 0.18091            | -5.52773                     | M down vs W                               | 4.39654            | 27.4675             | 46.8564    | 1        |
| cg03269050                  | TLX1NB                    | 0.03143                     | 0.01083                 | 0.31465            | -3.17815                     | M down vs W                               | 4.39636            | 11.5791             | 19.7534    | 1        |
| SNORD115-9;SNORD115-        |                           |                             |                         |                    |                              |                                           |                    |                     |            |          |
| cg07632934                  | 5;SNORD115-12;SNORD115-10 | 0.03151                     | 0.00987                 | 3.36197            | 3.36197                      | M up vs W                                 | 4.39251            | 12.3317             | 21.0559    | 1        |
| cg20415053                  | CATSPER4                  | 0.03159                     | 0.01062                 | 0.14333            | -6.97692                     | M down vs W                               | 4.38822            | 32.406              | 55.3858    | 1        |
| cg24682551                  | SLC22A15                  | 0.03165                     | 0.01611                 | 3.00081            | 3.00081                      | M up vs W                                 | 4.38551            | 12.0018             | 20.5252    | 1        |
| cg13741289                  | LAP3                      | 0.03177                     | 0.01101                 | 0.24493            | -4.08274                     | M down vs W                               | 4.96697            | 12.6675             | 12.7518    | 1        |
| cg01192077                  | EBF1                      | 0.0318                      | 0.00977                 | 0.1026             | -9.74696                     | M down vs W                               | 4.378              | 43.1904             | 73.99      | 1        |
| cg02745784                  | PDE11A                    | 0.03196                     | 0.0114                  | 4.81468            | 4.81468                      | M up vs W                                 | 4.36969            | 21.6354             | 37.1344    | 1        |
| cg04621020                  | SLCO4C1                   | 0.03213                     | 0.00995                 | 0.22579            | -4.42896                     | M down vs W                               | 4.36139            | 18.4883             | 31.7931    | 1        |
| cg01834010                  | ING1;ING1;ING1            | 0.03217                     | 0.03837                 | 0.27535            | -3.63176                     | M down vs W                               | 4.43734            | 21.9553             | 34.635     | 1        |
| cg24733126                  | SCUBE2;SCUBE2             | 0.03236                     | 0.01011                 | 4.80048            | 4.80048                      | M up vs W                                 | 4.35025            | 20.6021             | 35.5189    | 1        |
| cg25508118                  | STEAP3;STEAP3;STEAP3      | 0.03236                     | 0.01989                 | 7.40581            | 7.40581                      | M up vs W                                 | 5.43102            | 26.9434             | 19.844     | 1        |
| cg11298989                  | LENG8                     | 0.03256                     | 0.03256                 | 6.46359            | 6.46359                      | M up vs W                                 | 7.6547             | 10.873              | 8.52261    | 1        |
| cg11928000                  | SAFB2;SAFB2;SAFB          | 0.03263                     | 0.01068                 | 0.17836            | -5.60668                     | M down vs W                               | 4.50495            | 21.9947             | 31.7353    | 1        |
| cg12246608                  | RPH3AL                    | 0.0327                      | 0.0102                  | 3.35735            | 3.35735                      | M up vs W                                 | 4.33372            | 12.2721             | 21.2384    | 1        |
| cg17601209                  | PRDM16;PRDM16             | 0.03271                     | 0.01007                 | 3.10036            | 3.10036                      | M up vs W                                 | 4.33307            | 10.665              | 18.4597    | 1        |
| cg17204288                  | GAGE2A                    | 0.03274                     | 0.01485                 | 0.26796            | -3.73194                     | M down vs W                               | 4.33189            | 16.5277             | 28.6152    | 1        |
| cg27659796                  | ABR;ABR                   | 0.03281                     | 0.01091                 | 4.81533            | 4.81533                      | M up vs W                                 | 4.32865            | 21.1154             | 36.5855    | 1        |
| cg12318400                  | AMPD3                     | 0.03282                     | 0.01889                 | 0.11265            | -8.87676                     | M down vs W                               | 4.32804            | 49.6292             | 86.0018    | 1        |
| cg09084244                  | CDK2AP1                   | 0.0329                      | 0.01069                 | 4.28328            | 4.28328                      | M up vs W                                 | 4.32403            | 17.9461             | 31.1274    | 1        |
| cg20746134                  | HK1;HK1;HK1;HK1;HK1       | 0.03295                     | 0.01015                 | 3.77234            | 3.77234                      | M up vs W                                 | 4.3215             | 14.6789             | 25.4754    | 1        |
| cg24274579                  | TBX4                      | 0.03297                     | 0.01387                 | 0.20311            | -4.92344                     | M down vs W                               | 4.32076            | 23.569              | 40.9112    | 1        |
| cg26550710                  | GDF6                      | 0.03298                     | 0.01225                 | 0.31046            | -3.22104                     | M down vs W                               | 4.32043            | 12.1479             | 21.0879    | 1        |
| CBX3;CBX3;HNRNPA2B1;HNRNP   |                           |                             |                         |                    |                              |                                           |                    |                     |            |          |
| cg03547487                  | A2B1                      | 0.03311                     | 0.01172                 | 3.83286            | 3.83286                      | M up vs W                                 | 4.48024            | 13.4483             | 19.511     | 1        |
| WDR81;C17orf91;WDR81;C17orf |                           |                             |                         |                    |                              |                                           |                    |                     |            |          |
| cg20876723                  | f91;C17orf91;C17orf91     | 0.03315                     | 0.01365                 | 0.13922            | -7.18284                     | M down vs W                               | 6.33929            | 7.39317             | 3.49874    | 1        |
| cg14428252                  | C14orf38                  | 0.03321                     | 0.01122                 | 0.17784            | -5.62307                     | M down vs W                               | 4.30949            | 25.6197             | 44.5871    | 1        |
| cg06374325                  | NKX6-1                    | 0.03327                     | 0.01102                 | 0.24049            | -4.15818                     | M down vs W                               | 4.30649            | 17.3286             | 30.1787    | 1        |



| Probeset ID | UCSC_REFGENE_NAME            | p-value (H3.3 Status) | p-value (M vs. W) | Ratio (M vs. W) | Fold-Change (M vs. W) | Fold-Change (M vs. W) (Description) | F (H3.3 Status) | SS (H3.3 Status) | SS (Error) | F(Error) |
|-------------|------------------------------|-----------------------|-------------------|-----------------|-----------------------|-------------------------------------|-----------------|------------------|------------|----------|
| cg26816907  | LHX9;LHX9                    | 0.03645               | 0.01151           | 0.33289         | -3.00396              | M down vs W                         | 4.1637          | 10.1316          | 18.25      | 1        |
| cg27159088  | TEX14;TEX14                  | 0.03653               | 0.03653           | 0.09997         | -10.0028              | M down vs W                         | 7.18338         | 20.696           | 17.2866    | 1        |
| cg07833852  | OR52E8                       | 0.03656               | 0.02242           | 3.29165         | 3.29165               | M up vs W                           | 4.15906         | 15.1768          | 27.3682    | 1        |
| cg16998883  | TAF13                        | 0.03658               | 0.03884           | 0.27609         | -3.62203              | M down vs W                         | 4.41369         | 18.2843          | 24.8557    | 1        |
| cg10569807  | KRAS;KRAS                    | 0.0366                | 0.01348           | 0.32414         | -4.0851               | M down vs W                         | 4.41274         | 8.56558          | 11.6466    | 1        |
| cg12055395  | DLX6AS                       | 0.03668               | 0.01393           | 0.20277         | -4.93179              | M down vs W                         | 4.15397         | 22.7404          | 41.0579    | 1        |
| cg09396676  | LOC154822                    | 0.03673               | 0.01143           | 3.07087         | 3.07087               | M up vs W                           | 4.15164         | 10.4859          | 18.9429    | 1        |
| cg01476242  | RPTOR;RPTOR                  | 0.03723               | 0.01444           | 0.30414         | -3.28798              | M down vs W                         | 4.13059         | 12.7452          | 23.1417    | 1        |
|             | BLCAP;BLCAP;BLCAP;BLCAP;NN   |                       |                   |                 |                       |                                     |                 |                  |            |          |
| cg23757721  | AT;NNAT;BLCAP                | 0.03724               | 0.01177           | 3.26676         | 3.26676               | M up vs W                           | 4.13051         | 11.7322          | 21.3029    | 1        |
| cg14100946  | CDK6;CDK6                    | 0.03725               | 0.01221           | 0.27289         | -3.66451              | M down vs W                         | 4.13015         | 14.2986          | 25.965     | 1        |
| cg06535993  | APBB1IP                      | 0.03729               | 0.01416           | 0.23407         | -4.27221              | M down vs W                         | 4.12839         | 18.8239          | 34.1971    | 1        |
| cg26155697  | ITGA1                        | 0.03754               | 0.01217           | 3.02011         | 3.02011               | M up vs W                           | 4.11806         | 10.3135          | 18.7834    | 1        |
| cg13070738  | ARHGEF5                      | 0.03759               | 0.01215           | 3.07207         | 3.07207               | M up vs W                           | 4.11606         | 10.6248          | 19.3598    | 1        |
| cg20914464  | NOL4                         | 0.0376                | 0.01259           | 0.30657         | -3.26189              | M down vs W                         | 4.63671         | 8.54892          | 9.21874    | 1        |
| cg00670212  | LOC152225                    | 0.03767               | 0.01353           | 3.11826         | 3.11826               | M up vs W                           | 4.18225         | 10.5424          | 17.6452    | 1        |
| cg13177786  | AMPD3                        | 0.03771               | 0.03644           | 0.22261         | -4.49208              | M down vs W                         | 4.11101         | 29.2827          | 53.4224    | 1        |
| cg15223899  | C22orf45;C22orf45;UPB1       | 0.03772               | 0.01514           | 0.31551         | -3.16944              | M down vs W                         | 4.11032         | 12.1168          | 22.1092    | 1        |
|             | TXNRD1;TXNRD1;TXNRD1;EID3;   |                       |                   |                 |                       |                                     |                 |                  |            |          |
| cg21234561  | TXNRD1;TXNRD1                | 0.03773               | 0.01201           | 0.15578         | -6.41929              | M down vs W                         | 4.1103          | 28.9971          | 52.9106    | 1        |
| cg18801906  | SHANK2                       | 0.03777               | 0.01353           | 5.23595         | 5.23595               | M up vs W                           | 4.10849         | 23.9593          | 43.7373    | 1        |
| cg06733903  | TMTC1                        | 0.03788               | 0.01214           | 3.15783         | 3.15783               | M up vs W                           | 4.10393         | 11.115           | 20.3128    | 1        |
| cg24693368  | KCNJ3                        | 0.03808               | 0.01456           | 0.32417         | -3.08484              | M down vs W                         | 4.09596         | 11.3533          | 20.7887    | 1        |
| cg26890189  | SLC8A2                       | 0.0382                | 0.01207           | 0.0741          | -13.4948              | M down vs W                         | 4.1597          | 52.7164          | 88.7118    | 1        |
| cg22586996  | EBF1                         | 0.03831               | 0.01195           | 0.15703         | -6.36808              | M down vs W                         | 4.08665         | 28.5343          | 52.3674    | 1        |
| cg16748433  | ARHGEF10                     | 0.03833               | 0.012             | 0.32338         | -3.09237              | M down vs W                         | 4.08576         | 10.6246          | 19.5029    | 1        |
| cg01442600  | TIAM1                        | 0.03834               | 0.01443           | 3.47194         | 3.47194               | M up vs W                           | 4.0855          | 13.7824          | 25.3012    | 1        |
| cg25465065  | PMF1                         | 0.0384                | 0.01217           | 0.1563          | -6.39813              | M down vs W                         | 4.08286         | 28.8332          | 52.965     | 1        |
| cg16448058  | TLX1NB                       | 0.03859               | 0.01749           | 0.18063         | -5.53622              | M down vs W                         | 4.14377         | 25.9996          | 43.9207    | 1        |
| cg05731021  | KBTBD2                       | 0.03868               | 0.01291           | 3.00232         | 3.00232               | M up vs W                           | 4.31748         | 8.24677          | 11.4605    | 1        |
| cg18529845  | SRD5A2                       | 0.03868               | 0.01212           | 0.12554         | -7.96543              | M down vs W                         | 4.07162         | 35.8944          | 66.118     | 1        |
| cg25981350  | SDK1                         | 0.0387                | 0.01276           | 3.90251         | 3.90251               | M up vs W                           | 4.07089         | 15.7328          | 28.9854    | 1        |
| cg23049458  | L1TD1;L1TD1                  | 0.03872               | 0.01306           | 0.13055         | -7.66002              | M down vs W                         | 4.07024         | 35.4573          | 65.335     | 1        |
| cg06750897  | PBX1                         | 0.03874               | 0.01275           | 0.30762         | -3.2508               | M down vs W                         | 4.06916         | 11.7828          | 21.7172    | 1        |
| cg15215348  | PDE4C                        | 0.03881               | 0.02655           | 0.20805         | -4.80656              | M down vs W                         | 4.06666         | 27.5934          | 50.8894    | 1        |
| cg11497952  | HELT                         | 0.03904               | 0.01258           | 0.29467         | -3.39363              | M down vs W                         | 4.12529         | 11.6952          | 19.845     | 1        |
| cg02332902  | C7orf50;C7orf50;C7orf50      | 0.03904               | 0.02154           | 3.42266         | 3.42266               | M up vs W                           | 4.05725         | 15.5442          | 28.7341    | 1        |
| cg20469625  | ZFPM2                        | 0.03905               | 0.01222           | 3.19442         | 3.19442               | M up vs W                           | 4.05703         | 11.2348          | 20.7692    | 1        |
| cg05114178  | OR5R1;OR8U8                  | 0.03914               | 0.04529           | 3.13361         | 3.13361               | M up vs W                           | 4.05328         | 18.4658          | 34.1682    | 1        |
| cg05575054  | ADRB1                        | 0.03932               | 0.01827           | 0.28061         | -3.5637               | M down vs W                         | 4.04653         | 15.5204          | 28.7661    | 1        |
| cg13807985  | IRAK3;IRAK3                  | 0.03967               | 0.0202            | 0.18201         | -5.4941               | M down vs W                         | 4.03294         | 28.8876          | 53.7219    | 1        |
| cg06143522  | SLITRK5                      | 0.03985               | 0.01313           | 0.12298         | -8.1312               | M down vs W                         | 4.02568         | 37.2213          | 69.3446    | 1        |
| cg26992415  | AMOTL1                       | 0.03988               | 0.01685           | 3.27353         | 3.27353               | M up vs W                           | 4.02452         | 13.0405          | 24.302     | 1        |
| cg14279151  | TRAM2                        | 0.03993               | 0.01256           | 3.3596          | 3.3596                | M up vs W                           | 4.0227          | 12.2453          | 22.8304    | 1        |
| cg02867242  | SLC44A4                      | 0.04002               | 0.03748           | 3.587           | 3.587                 | M up vs W                           | 4.01923         | 20.96            | 39.1119    | 1        |
|             | CX3CR1;CX3CR1;CX3CR1;CX3CR1; |                       |                   |                 |                       |                                     |                 |                  |            |          |
| cg18565762  | 1;CX3CR1                     | 0.04003               | 0.01255           | 0.26874         | -3.72101              | M down vs W                         | 4.01874         | 14.3805          | 26.8377    | 1        |
|             | AMACR;AMACR;AMACR;AMAC       |                       |                   |                 |                       |                                     |                 |                  |            |          |
| cg18397975  | R;AMACR;AMACR                | 0.04009               | 0.01365           | 3.68406         | 3.68406               | M up vs W                           | 4.0165          | 14.578           | 27.2215    | 1        |
| cg03485694  | EFCAB4B;EFCAB4B;EFCAB4B      | 0.04023               | 0.0134            | 3.36633         | 3.36633               | M up vs W                           | 4.01106         | 12.5321          | 23.4329    | 1        |
| cg19657174  | TBX1;TBX1;TBX1               | 0.04048               | 0.01334           | 0.23459         | -4.2628               | M down vs W                         | 4.0019          | 17.8129          | 33.3833    | 1        |
| cg04273303  | WNT3A                        | 0.04055               | 0.03858           | 0.12999         | -7.69322              | M down vs W                         | 3.99908         | 53.9208          | 101.125    | 1        |
| cg20012915  | CYB5R2                       | 0.04059               | 0.02497           | 0.25735         | -3.88571              | M down vs W                         | 3.99752         | 19.7701          | 37.092     | 1        |
| cg18635552  | IRX1                         | 0.04073               | 0.0226            | 0.15542         | -6.43433              | M down vs W                         | 3.99243         | 35.6823          | 67.0312    | 1        |
| cg13848598  | ADRB1                        | 0.04074               | 0.01282           | 0.27721         | -3.60732              | M down vs W                         | 3.992           | 13.7193          | 25.7753    | 1        |
| cg22152328  | MX1;MX1                      | 0.04076               | 0.0265            | 0.30873         | -3.23906              | M down vs W                         | 3.9911          | 15.1656          | 28.4989    | 1        |
| cg20690714  | DNAH17                       | 0.04084               | 0.01297           | 4.77574         | 4.77574               | M up vs W                           | 3.98815         | 20.4367          | 38.4327    | 1        |
| cg19788741  | SLCO4C1                      | 0.04088               | 0.01294           | 0.12106         | -8.26074              | M down vs W                         | 3.98651         | 37.2256          | 70.0342    | 1        |
| cg19021960  | C1orf35                      | 0.04091               | 0.01732           | 3.82949         | 3.82949               | M up vs W                           | 5.70627         | 6.92267          | 3.63951    | 1        |
| cg23654971  | GBF1                         | 0.04093               | 0.02553           | 0.26136         | -3.82616              | M down vs W                         | 4.89316         | 12.2313          | 9.9987     | 1        |
| cg13576342  | NIPAL4;NIPAL4                | 0.04094               | 0.01712           | 0.31808         | -3.14387              | M down vs W                         | 3.98458         | 12.1168          | 22.807     | 1        |

| Probeset ID | UCSC_REFGENE_NAME                                                          | p-value (H3.3 Status) | p-value (M vs. W) | Ratio (M vs. W) | Fold-Change (M vs. W) | Fold-Change (M vs. W) (Description) | F (H3.3 Status) | SS (H3.3 Status) | SS (Error) | F(Error) |
|-------------|----------------------------------------------------------------------------|-----------------------|-------------------|-----------------|-----------------------|-------------------------------------|-----------------|------------------|------------|----------|
| cg22226656  | KIF26B                                                                     | 0.04102               | 0.01404           | 3.53736         | 3.53736               | M up vs W                           | 3.98148         | 13.7013          | 25.8094    | 1        |
| cg20311754  | COL4A1                                                                     | 0.04106               | 0.0129            | 0.30434         | -3.28579              | M down vs W                         | 3.9799          | 11.7826          | 22.204     | 1        |
| cg22939005  | EGFR;EGFR;EGFR;EGFR                                                        | 0.04112               | 0.01292           | 3.21439         | 3.21439               | M up vs W                           | 3.97773         | 11.3543          | 21.4085    | 1        |
| cg06590444  | ACPT                                                                       | 0.04125               | 0.01296           | 3.02339         | 3.02339               | M up vs W                           | 3.97267         | 10.1914          | 19.2403    | 1        |
| cg19638477  | GATA2                                                                      | 0.04141               | 0.01308           | 0.26108         | -3.83026              | M down vs W                         | 3.96679         | 15.0398          | 28.4357    | 1        |
| cg02093112  | FBXO39                                                                     | 0.0415                | 0.01972           | 0.23341         | -4.28425              | M down vs W                         | 3.96376         | 20.5151          | 38.8174    | 1        |
| cg05855917  | ZIC4;ZIC4;ZIC4                                                             | 0.04159               | 0.01442           | 7.11412         | 7.11412               | M up vs W                           | 3.96034         | 33.1842          | 62.8434    | 1        |
| cg01837410  | SLCO4C1;SLCO4C1                                                            | 0.04185               | 0.01323           | 0.23856         | -4.19182              | M down vs W                         | 3.95075         | 17.1294          | 32.5181    | 1        |
| cg27642554  | GRM1;GRM1                                                                  | 0.04188               | 0.02525           | 0.25004         | -3.99939              | M down vs W                         | 3.94959         | 20.4638          | 38.8593    | 1        |
| cg13409449  | GATA3;GATA3                                                                | 0.04192               | 0.01636           | 0.25801         | -3.87587              | M down vs W                         | 3.94834         | 16.5162          | 31.3731    | 1        |
| cg19568649  | DAD1;DAD1                                                                  | 0.04195               | 0.02354           | 0.22906         | -4.3657               | M down vs W                         | 4.42803         | 14.3075          | 16.1556    | 1        |
| cg00880452  | SYCN                                                                       | 0.04199               | 0.01323           | 0.26407         | -3.78695              | M down vs W                         | 3.94567         | 14.7672          | 28.0697    | 1        |
| cg21049501  | SOX9                                                                       | 0.04215               | 0.01474           | 0.2448          | -4.0849               | M down vs W                         | 3.9398          | 17.1195          | 32.5895    | 1        |
| cg12001148  | KLHL35                                                                     | 0.0423                | 0.01576           | 3.00896         | 3.00896               | M up vs W                           | 3.9344          | 10.7326          | 20.4592    | 1        |
| cg26309194  | TMPRSS2;TMPRSS2                                                            | 0.04237               | 0.01342           | 0.26285         | -3.8044               | M down vs W                         | 3.93197         | 14.893           | 28.4076    | 1        |
| cg23057706  | RASGRP2;RASGRP2;RASGRP2                                                    | 0.04238               | 0.01536           | 3.03322         | 3.03322               | M up vs W                           | 4.5843          | 6.33539          | 6.21888    | 1        |
| cg02343736  | KLHL35                                                                     | 0.0424                | 0.01645           | 3.07446         | 3.07446               | M up vs W                           | 3.93083         | 11.324           | 21.6062    | 1        |
| cg07045089  | TP73;TP73;TP73;TP73                                                        | 0.04247               | 0.01385           | 3.47602         | 3.47602               | M up vs W                           | 3.92847         | 13.0843          | 29.9797    | 1        |
| cg18965377  | BACH2;BACH2                                                                | 0.04249               | 0.04249           | 0.2139          | -4.6752               | M down vs W                         | 6.12792         | 7.70117          | 8.79715    | 1        |
| cg16654610  | ZNF721                                                                     | 0.04252               | 0.02156           | 3.05364         | 3.05364               | M up vs W                           | 3.9265          | 12.3874          | 23.661     | 1        |
| cg26844171  | VDAC3;VDAC3                                                                | 0.04259               | 0.01458           | 0.27377         | -3.65276              | M down vs W                         | 4.39977         | 9.64606          | 10.962     | 1        |
| cg16355271  | EVX1                                                                       | 0.0426                | 0.01355           | 0.31223         | -3.20279              | M down vs W                         | 3.92354         | 11.3183          | 21.6353    | 1        |
| cg25219728  | PARM1                                                                      | 0.0427                | 0.0144            | 3.02181         | 3.02181               | M up vs W                           | 3.92015         | 10.4302          | 19.9549    | 1        |
| cg18481230  | KCNJ3                                                                      | 0.04275               | 0.01484           | 0.15046         | -6.64617              | M down vs W                         | 3.91818         | 30.9116          | 59.1695    | 1        |
| cg01454487  | DUOX1;DUOX1                                                                | 0.04285               | 0.02035           | 0.1293          | -7.73426              | M down vs W                         | 3.91481         | 40.5446          | 77.6754    | 1        |
| cg11854154  | AMPD3                                                                      | 0.04287               | 0.02415           | 0.19011         | -5.26015              | M down vs W                         | 3.91424         | 28.5716          | 54.7456    | 1        |
| cg03664443  | MC2R                                                                       | 0.04303               | 0.016             | 3.33169         | 3.33169               | M up vs W                           | 3.90829         | 12.7965          | 24.5564    | 1        |
| cg26124318  | ADAM32;ADAM32                                                              | 0.04311               | 0.01624           | 0.19081         | -5.2407               | M down vs W                         | 3.90565         | 24.3587          | 46.776     | 1        |
| cg01307174  | ARPP-21;ARPP-21;ARPP-21;ARPP-21;ARPP-21;ARPP-21;HTR4;HTR4;HTR4;HTR4;HTR4;H | 0.04312               | 0.01494           | 3.0445          | 3.0445                | M up vs W                           | 3.90528         | 10.6727          | 20.4967    | 1        |
| cg01808284  | TR4;HTR4                                                                   | 0.04312               | 0.03147           | 3.89376         | 3.89376               | M up vs W                           | 3.90516         | 21.348           | 40.9996    | 1        |
| cg00522403  | ZNF843                                                                     | 0.04339               | 0.02936           | 4.35888         | 4.35888               | M up vs W                           | 3.89589         | 24.2488          | 46.6814    | 1        |
| cg24041078  | BTG4;MIR34C                                                                | 0.04342               | 0.01587           | 0.29446         | -3.39601              | M down vs W                         | 3.89469         | 13.1213          | 25.2677    | 1        |
| cg00109076  | SLITRK5                                                                    | 0.04349               | 0.01487           | 0.20488         | -4.88096              | M down vs W                         | 3.89237         | 21.5312          | 41.4874    | 1        |
| cg04095826  | PGBD5                                                                      | 0.04355               | 0.01416           | 3.18953         | 3.18953               | M up vs W                           | 3.89006         | 11.3163          | 21.8178    | 1        |
| cg07749664  | KLF5                                                                       | 0.04355               | 0.03265           | 0.31886         | -3.1362               | M down vs W                         | 3.89004         | 15.2772          | 29.4545    | 1        |
| cg11786966  | ROR1;ROR1                                                                  | 0.04358               | 0.01418           | 3.13709         | 3.13709               | M up vs W                           | 3.88927         | 10.9986          | 21.2095    | 1        |
| cg00554969  | TBX22;TBX22;TBX22                                                          | 0.04372               | 0.01396           | 0.12418         | -8.05281              | M down vs W                         | 3.88423         | 36.367           | 70.2206    | 1        |
| cg06480736  | SLCO4C1                                                                    | 0.04375               | 0.01389           | 0.21202         | -4.71656              | M down vs W                         | 3.88306         | 20.0626          | 38.7503    | 1        |
| cg14013099  | OR2M5                                                                      | 0.04399               | 0.02662           | 3.51974         | 3.51974               | M up vs W                           | 3.87499         | 16.9102          | 32.7294    | 1        |
| cg06380320  | SEPT9;SEPT9;SEPT9;SEPT9;SEPT9                                              | 0.04409               | 0.01556           | 3.05357         | 3.05357               | M up vs W                           | 3.87141         | 10.794           | 20.9109    | 1        |
| cg02945056  | GCC1                                                                       | 0.04413               | 0.01516           | 0.2789          | -3.58548              | M down vs W                         | 3.87024         | 13.9863          | 27.1036    | 1        |
| cg16414143  | ESPN                                                                       | 0.04429               | 0.01619           | 0.24516         | -4.07901              | M down vs W                         | 3.86448         | 17.3411          | 33.6548    | 1        |
| cg15724256  | EN1                                                                        | 0.0443                | 0.01428           | 0.33153         | -3.0163               | M down vs W                         | 3.86435         | 10.2162          | 19.8277    | 1        |
| cg23820589  | PRKCZ;PRKCZ                                                                | 0.04432               | 0.01405           | 3.423           | 3.423                 | M up vs W                           | 3.86343         | 12.6164          | 24.492     | 1        |
| cg18021902  | WDR8                                                                       | 0.04446               | 0.02571           | 0.23664         | -4.2258               | M down vs W                         | 3.85877         | 21.7755          | 42.3234    | 1        |
| cg07333715  | ASCL2                                                                      | 0.04458               | 0.01792           | 0.2387          | -4.18931              | M down vs W                         | 3.85464         | 18.6503          | 36.288     | 1        |
| cg26529864  | BOLA3;BOLA3                                                                | 0.04464               | 0.01583           | 4.50132         | 4.50132               | M up vs W                           | 3.85268         | 19.6317          | 38.217     | 1        |
| cg17284804  | TCTEX1D1                                                                   | 0.04464               | 0.01899           | 0.31177         | -3.20748              | M down vs W                         | 3.85261         | 12.6122          | 24.5526    | 1        |
| cg16810310  | BRMS1;BRMS1;RIN1                                                           | 0.0447                | 0.01415           | 0.27493         | -3.63726              | M down vs W                         | 3.85079         | 13.8812          | 27.0357    | 1        |
| cg20360416  | SORCS2                                                                     | 0.04479               | 0.01478           | 3.67732         | 3.67732               | M up vs W                           | 3.84756         | 14.3283          | 27.93      | 1        |
| cg24664957  | VPS37B                                                                     | 0.04489               | 0.01556           | 3.20735         | 3.20735               | M up vs W                           | 3.84424         | 11.6826          | 22.7924    | 1        |
| cg09016243  | GLUD2                                                                      | 0.04517               | 0.0144            | 0.14333         | -6.97712              | M down vs W                         | 3.83483         | 31.4824          | 61.5719    | 1        |
| cg22711111  | TRIM15                                                                     | 0.04521               | 0.03806           | 0.20175         | -4.95655              | M down vs W                         | 3.83337         | 31.6168          | 61.8583    | 1        |
| cg18150584  | ID3                                                                        | 0.04523               | 0.01915           | 3.09041         | 3.09041               | M up vs W                           | 3.83287         | 11.7974          | 23.0846    | 1        |
| cg14608180  | PTGDS                                                                      | 0.04528               | 0.01462           | 3.4469          | 3.4469                | M up vs W                           | 3.83103         | 12.8326          | 25.1224    | 1        |
| cg02483661  | HES5                                                                       | 0.0453                | 0.01603           | 3.16209         | 3.16209               | M up vs W                           | 3.83046         | 11.4828          | 22.4832    | 1        |
| cg02474731  | LYPD6                                                                      | 0.04534               | 0.01572           | 3.14761         | 3.14761               | M up vs W                           | 3.82917         | 11.3062          | 22.1449    | 1        |
| cg18001180  | KCNK17;KCNK17                                                              | 0.04535               | 0.01546           | 0.11646         | -8.5868               | M down vs W                         | 3.96144         | 34.3993          | 56.443     | 1        |

| Probeset ID | UCSC_REFGENE_NAME                                       | p-value (H3.3 Status) | p-value (M vs. W) | Ratio (M vs. W) | Fold-Change (M vs. W) | Fold-Change (M vs. W) (Description) | F (H3.3 Status) | SS (H3.3 Status) | SS (Error) | F(Error) |
|-------------|---------------------------------------------------------|-----------------------|-------------------|-----------------|-----------------------|-------------------------------------|-----------------|------------------|------------|----------|
|             | C1QTNF1;C1QTNF1;C1QTNF1;C                               |                       |                   |                 |                       |                                     |                 |                  |            |          |
| cg07162665  | 1QTNF1                                                  | 0.04565               | 0.01921           | 0.29888         | -3.34586              | M down vs W                         | 3.87951         | 12.5693          | 22.6794    | 1        |
| cg02918903  | HTR2C                                                   | 0.04569               | 0.02062           | 0.22715         | -4.40234              | M down vs W                         | 3.81758         | 20.8611          | 40.9837    | 1        |
| cg01395541  | SPDEF                                                   | 0.0457                | 0.01467           | 3.00831         | 3.00831               | M up vs W                           | 3.81713         | 10.141           | 19.9253    | 1        |
| cg15574437  | MAD1L1;MAD1L1;MAD1L1                                    | 0.04595               | 0.01459           | 5.38202         | 5.38202               | M up vs W                           | 3.80903         | 23.5836          | 46.4362    | 1        |
| cg19155699  | TM4SF19                                                 | 0.046                 | 0.01465           | 3.05419         | 3.05419               | M up vs W                           | 3.80738         | 10.3895          | 20.4658    | 1        |
| cg11302992  | ELP4                                                    | 0.04603               | 0.01922           | 3.34477         | 3.34477               | M up vs W                           | 3.80648         | 13.4366          | 26.4744    | 1        |
| cg26196882  | SV2A                                                    | 0.04607               | 0.01474           | 3.38817         | 3.38817               | M up vs W                           | 3.80498         | 12.4307          | 24.5022    | 1        |
| cg08091192  | ZIC4;ZIC4;ZIC4                                          | 0.04624               | 0.01979           | 4.04608         | 4.04608               | M up vs W                           | 3.79956         | 18.1764          | 35.8785    | 1        |
| cg04375931  | SMG6;SMG6;SRR                                           | 0.04624               | 0.01636           | 3.04902         | 3.04902               | M up vs W                           | 3.79939         | 10.7603          | 21.2409    | 1        |
| cg23717290  | NHLRC2;DCLRE1A                                          | 0.04629               | 0.02776           | 5.01166         | 5.01166               | M up vs W                           | 10.1349         | 5.44329          | 0.80562    | 1        |
| cg24569831  | RGMA;RGMA;RGMA;RGMA;RGMA;RGMA;NFATC1;NFATC1;NFATC1;NFAT | 0.04638               | 0.01555           | 3.5831          | 3.5831                | M up vs W                           | 3.79492         | 13.826           | 27.3246    | 1        |
| cg21192698  | C1                                                      | 0.04638               | 0.0185            | 3.78412         | 3.78412               | M up vs W                           | 3.79479         | 16.0378          | 31.6971    | 1        |
| cg13332774  | GSTO2                                                   | 0.04672               | 0.02756           | 0.25497         | -3.92202              | M down vs W                         | 3.78394         | 19.7603          | 39.1661    | 1        |
| cg09373037  | SYT15;SYT15                                             | 0.04682               | 0.02135           | 0.28619         | -3.49421              | M down vs W                         | 3.78061         | 14.9229          | 29.6041    | 1        |
| cg11038340  | AMN                                                     | 0.04692               | 0.01533           | 0.25352         | -3.94443              | M down vs W                         | 3.7774          | 15.8311          | 31.4325    | 1        |
| cg13803647  | LOC390858                                               | 0.04708               | 0.01542           | 3.74994         | 3.74994               | M up vs W                           | 3.77238         | 14.6961          | 29.2179    | 1        |
| cg06501832  | ROBO3                                                   | 0.0472                | 0.02831           | 0.20833         | -4.8002               | M down vs W                         | 3.7687          | 26.2232          | 52.1861    | 1        |
| cg01058932  | PFKFB1                                                  | 0.04726               | 0.01753           | 3.0217          | 3.0217                | M up vs W                           | 3.76655         | 10.7703          | 21.446     | 1        |
| cg19480724  | EVX1                                                    | 0.04731               | 0.01634           | 0.11743         | -8.51577              | M down vs W                         | 3.76493         | 39.3449          | 78.3777    | 1        |
| cg08862890  | DOCK2                                                   | 0.04735               | 0.01631           | 0.08907         | -11.2266              | M down vs W                         | 3.76375         | 50.1075          | 99.8489    | 1        |
| cg06367311  | PLLP                                                    | 0.0474                | 0.02127           | 0.23504         | -4.25459              | M down vs W                         | 3.76219         | 19.8631          | 39.5974    | 1        |
| cg16786117  | VSIG4;VSIG4                                             | 0.04762               | 0.017             | 3.26417         | 3.26417               | M up vs W                           | 3.75519         | 12.1492          | 24.2648    | 1        |
| cg08933939  | PRDM13                                                  | 0.04764               | 0.02004           | 4.04354         | 4.04354               | M up vs W                           | 3.75467         | 18.0308          | 36.0168    | 1        |
| cg07860213  | PRDM14                                                  | 0.04775               | 0.01533           | 0.15479         | -6.46056              | M down vs W                         | 3.75122         | 29.0571          | 58.0953    | 1        |
| cg00485849  | RASSF6;RASSF6                                           | 0.04779               | 0.02131           | 0.33083         | -3.02273              | M down vs W                         | 3.75            | 11.5617          | 23.1234    | 1        |
| cg02637318  | ADAM32;ADAM32                                           | 0.04787               | 0.01902           | 0.18632         | -5.36717              | M down vs W                         | 3.74751         | 25.5158          | 51.0654    | 1        |
| cg06493612  | JARID2                                                  | 0.04816               | 0.01617           | 3.95642         | 3.95642               | M up vs W                           | 3.73836         | 16.0475          | 32.1948    | 1        |
| cg13620034  | MSC                                                     | 0.04816               | 0.01682           | 0.13809         | -7.24188              | M down vs W                         | 3.73834         | 33.7435          | 67.6976    | 1        |
| cg05412957  | SCGN                                                    | 0.0482                | 0.0171            | 0.23558         | -4.24482              | M down vs W                         | 3.73701         | 18.0959          | 36.3176    | 1        |
| cg16333971  | UBL3                                                    | 0.04831               | 0.01674           | 0.21559         | -4.63836              | M down vs W                         | 4.32379         | 13.4553          | 14.0036    | 1        |
| cg19431051  | C11orf64                                                | 0.04859               | 0.01832           | 3.24978         | 3.24978               | M up vs W                           | 3.72515         | 12.3031          | 24.7703    | 1        |
| cg24867790  | NPHS2                                                   | 0.04878               | 0.02944           | 4.35228         | 4.35228               | M up vs W                           | 3.71915         | 23.1272          | 46.638     | 1        |
| cg22309623  | ZNF492                                                  | 0.04891               | 0.01675           | 0.15713         | -6.36409              | M down vs W                         | 3.71528         | 29.2522          | 59.0511    | 1        |
| cg15891218  | TMEM30B;TMEM30B                                         | 0.04912               | 0.02448           | 0.31772         | -3.14743              | M down vs W                         | 3.70895         | 12.9854          | 26.2583    | 1        |
| cg09733864  | LOC154822                                               | 0.04925               | 0.01758           | 3.81695         | 3.81695               | M up vs W                           | 3.70501         | 15.5591          | 31.4961    | 1        |
| cg12239580  | FAM198A                                                 | 0.0495                | 0.01611           | 3.1927          | 3.1927                | M up vs W                           | 3.69723         | 11.2907          | 22.9037    | 1        |
| cg01506891  | LETM2                                                   | 0.04966               | 0.02086           | 3.3055          | 3.3055                | M up vs W                           | 4.75326         | 6.01914          | 4.43212    | 1        |
| cg00069771  | C1orf57                                                 | 0.04974               | 0.01644           | 0.15608         | -6.40718              | M down vs W                         | 3.69023         | 29.0679          | 59.0774    | 1        |
| cg10120897  | ZNF469                                                  | 0.04974               | 0.01671           | 3.23901         | 3.23901               | M up vs W                           | 3.69014         | 11.708           | 23.796     | 1        |
| cg04507915  | TRIM71                                                  | 0.04977               | 0.02749           | 0.25632         | -3.9014               | M down vs W                         | 3.6891          | 19.096           | 38.8226    | 1        |
| cg10659805  | DLX6AS                                                  | 0.0498                | 0.01604           | 0.14384         | -6.95232              | M down vs W                         | 3.68816         | 31.3733          | 63.7988    | 1        |
| cg05603630  | PRKG1                                                   | 0.04987               | 0.02111           | 0.31261         | -3.19892              | M down vs W                         | 4.26147         | 7.40354          | 7.81794    | 1        |
| cg19704805  | LMO3;LMO3                                               | 0.04989               | 0.01638           | 0.23912         | -4.18195              | M down vs W                         | 3.88887         | 13.7658          | 21.2388    | 1        |
| cg25592206  | CDKN2C;CDKN2C                                           | 0.04997               | 0.01672           | 3.38973         | 3.38973               | M up vs W                           | 3.68316         | 12.6093          | 25.6762    | 1        |
| cg04922154  | EVX1                                                    | 0.04999               | 0.01601           | 0.28164         | -3.55066              | M down vs W                         | 3.68263         | 13.3688          | 27.2267    | 1        |
| cg24453580  | PRPH                                                    | 0.05004               | 0.02457           | 0.04415         | -22.6515              | M down vs W                         | 3.73754         | 89.1581          | 166.983    | 1        |
| cg05604079  | QRFPR                                                   | 0.05017               | 0.02464           | 0.25442         | -3.93058              | M down vs W                         | 3.67727         | 18.3944          | 37.5164    | 1        |
| cg09667289  | FMN1                                                    | 0.05024               | 0.01911           | 3.99464         | 3.99464               | M up vs W                           | 3.67527         | 17.0315          | 34.7556    | 1        |
| cg21555796  | KLHL35                                                  | 0.05025               | 0.01665           | 5.03708         | 5.03708               | M up vs W                           | 3.67503         | 22.0385          | 44.9762    | 1        |
| cg10074347  | MAD1L1;MAD1L1;MAD1L1                                    | 0.05031               | 0.01785           | 3.44505         | 3.44505               | M up vs W                           | 3.67321         | 13.2301          | 27.0133    | 1        |
| cg05753675  | RNF216;RNF216                                           | 0.05031               | 0.02828           | 4.0358          | 4.0358                | M up vs W                           | 3.97173         | 15.1567          | 20.9888    | 1        |
| cg26998044  | PIK3R5                                                  | 0.05043               | 0.03158           | 0.32262         | -3.09963              | M down vs W                         | 3.66945         | 13.9137          | 28.4383    | 1        |
| cg23729107  | FBXO39                                                  | 0.05044               | 0.01618           | 0.18278         | -5.47111              | M down vs W                         | 3.66927         | 24.055           | 49.1684    | 1        |
| cg07449450  | USH1C;USH1C                                             | 0.05054               | 0.01623           | 0.13358         | -7.48624              | M down vs W                         | 3.66634         | 33.7635          | 69.0678    | 1        |
| cg02802871  | GIN51                                                   | 0.05066               | 0.01823           | 3.63991         | 3.63991               | M up vs W                           | 3.71881         | 13.5133          | 25.4363    | 1        |
| cg08002883  | FGF12;FGF12                                             | 0.05077               | 0.02882           | 0.06156         | -16.2454              | M down vs W                         | 3.71538         | 81.0401          | 152.684    | 1        |
| cg09227621  | WNT3A                                                   | 0.05086               | 0.03011           | 0.2048          | -4.88274              | M down vs W                         | 3.65692         | 26.6887          | 54.7359    | 1        |
| cg17770035  | NCR2                                                    | 0.05109               | 0.01708           | 0.1972          | -5.07113              | M down vs W                         | 3.65022         | 22.2796          | 45.7773    | 1        |

| Probeset ID | UCSC_REFGENE_NAME             | p-value (H3.3 Status) | p-value (M vs. W) | Ratio (M vs. W) | Fold-Change (M vs. W) | Fold-Change (M vs. W) (Description) | F (H3.3 Status) | SS (H3.3 Status) | SS (Error) | F(Error) |
|-------------|-------------------------------|-----------------------|-------------------|-----------------|-----------------------|-------------------------------------|-----------------|------------------|------------|----------|
| cg19046783  | CYP3A4                        | 0.05114               | 0.03555           | 3.35438         | 3.35438               | M up vs W                           | 3.64872         | 16.6805          | 34.2869    | 1        |
| cg25793521  | UCP1                          | 0.05118               | 0.04325           | 0.24917         | -4.0134               | M down vs W                         | 3.6477          | 24.0638          | 49.4773    | 1        |
| cg17004290  | CYP2U1                        | 0.05127               | 0.03716           | 0.23784         | -4.20446              | M down vs W                         | 3.64494         | 23.9367          | 49.2533    | 1        |
| cg04814784  | VHL;VHL                       | 0.0513                | 0.03155           | 5.21111         | 5.21111               | M up vs W                           | 3.64421         | 29.4091          | 60.5257    | 1        |
| cg16241932  | ZDHHC14;ZDHHC14               | 0.0515                | 0.01666           | 0.21913         | -4.5636               | M down vs W                         | 3.6384          | 19.2379          | 39.6559    | 1        |
| cg26746936  | GRIK5                         | 0.05152               | 0.01897           | 5.15789         | 5.15789               | M up vs W                           | 3.63783         | 23.5865          | 48.6275    | 1        |
| cg26296488  | DRD5                          | 0.05158               | 0.0236            | 0.1293          | -7.73395              | M down vs W                         | 3.63615         | 39.9261          | 82.3523    | 1        |
| cg18513313  | SYT15;SYT15                   | 0.05161               | 0.02581           | 0.30804         | -3.24635              | M down vs W                         | 3.63508         | 13.7151          | 28.2974    | 1        |
| cg10140126  | AFF3;AFF3                     | 0.05163               | 0.01767           | 3.05682         | 3.05682               | M up vs W                           | 3.63456         | 10.6426          | 21.9613    | 1        |
| cg07618759  | COL4A2                        | 0.05163               | 0.01661           | 3.80763         | 3.80763               | M up vs W                           | 3.63446         | 14.8911          | 30.7289    | 1        |
| cg07657142  | KIAA1586;KIAA1586             | 0.05165               | 0.01782           | 3.78605         | 3.78605               | M up vs W                           | 4.04383         | 10.1524          | 12.553     | 1        |
| cg05840533  | C20orf70                      | 0.0517                | 0.02012           | 4.53096         | 4.53096               | M up vs W                           | 3.63247         | 20.436           | 42.1945    | 1        |
| cg06070263  | ZIC4;ZIC4;ZIC4                | 0.05177               | 0.01755           | 3.95147         | 3.95147               | M up vs W                           | 3.63067         | 16.0369          | 33.128     | 1        |
| cg03934926  | KLHL35                        | 0.05188               | 0.0355            | 4.91206         | 4.91206               | M up vs W                           | 3.6275          | 28.667           | 59.2702    | 1        |
| cg09128567  | ECHDC2                        | 0.05199               | 0.01912           | 0.10024         | -9.9759               | M down vs W                         | 3.62416         | 46.3291          | 95.8755    | 1        |
| cg13170705  | ADAMTS17                      | 0.05209               | 0.03291           | 3.00455         | 3.00455               | M up vs W                           | 3.62133         | 13.2211          | 27.3818    | 1        |
| cg17610800  | EVX1                          | 0.05218               | 0.03755           | 0.33035         | -3.0271               | M down vs W                         | 3.61892         | 14.2032          | 29.4352    | 1        |
| cg10931884  | KCNIP1;KCNIP1;KCNIP1          | 0.05227               | 0.01682           | 5.43063         | 5.43063               | M up vs W                           | 3.61623         | 23.8382          | 49.4399    | 1        |
| cg03347632  | PGBD5                         | 0.0523                | 0.01724           | 4.55576         | 4.55576               | M up vs W                           | 3.6156          | 19.3191          | 40.0744    | 1        |
| cg20480723  | VPS53                         | 0.0524                | 0.02743           | 3.16521         | 3.16521               | M up vs W                           | 3.6126          | 13.3835          | 27.785     | 1        |
| cg02819655  | PDE11A;PDE11A                 | 0.05242               | 0.03051           | 0.20496         | -4.879                | M down vs W                         | 3.61201         | 26.4845          | 54.9925    | 1        |
| cg12361311  | TRPC4AP;TRPC4AP               | 0.05268               | 0.02935           | 3.70834         | 3.70834               | M up vs W                           | 4.15562         | 11.0973          | 12.0169    | 1        |
| cg14662355  | LMX1A;LMX1A                   | 0.05268               | 0.01854           | 0.31003         | -3.22552              | M down vs W                         | 3.60464         | 11.8068          | 24.5659    | 1        |
| cg05797929  | STEAP1                        | 0.0527                | 0.03789           | 0.29021         | -3.44577              | M down vs W                         | 3.60412         | 17.7193          | 36.8729    | 1        |
| cg02003183  | CDC42BPB                      | 0.05277               | 0.01784           | 3.17285         | 3.17285               | M up vs W                           | 3.60228         | 11.3028          | 23.5325    | 1        |
| cg22166144  | SKI                           | 0.05286               | 0.0171            | 3.37827         | 3.37827               | M up vs W                           | 3.5997          | 12.3585          | 25.749     | 1        |
| cg22443762  | LHX9;LHX9                     | 0.05292               | 0.01727           | 0.31226         | -3.20246              | M down vs W                         | 3.59799         | 11.3326          | 23.6228    | 1        |
| cg11802864  | LTBP3;LTBP3;LTBP3             | 0.05293               | 0.01876           | 0.16828         | -5.94249              | M down vs W                         | 3.59769         | 27.4078          | 57.1362    | 1        |
| cg21277995  | IRF4                          | 0.05302               | 0.02738           | 0.03596         | -27.8122              | M down vs W                         | 3.71294         | 96.9147          | 169.662    | 1        |
| cg18155211  | ELP2P;GEMIN4;GEMIN4           | 0.0531                | 0.01873           | 3.50595         | 3.50595               | M up vs W                           | 3.59302         | 13.5568          | 28.2981    | 1        |
| cg00350835  | PLEKHA7                       | 0.05322               | 0.02075           | 4.79176         | 4.79176               | M up vs W                           | 3.58952         | 21.9786          | 45.9224    | 1        |
| cg07989833  | RGMA;RGMA;RGMA;RGMA;RGMA;RGMA | 0.05323               | 0.01735           | 3.69843         | 3.69843               | M up vs W                           | 3.58935         | 14.3017          | 29.8837    | 1        |
| cg25051341  | PRDM13                        | 0.05323               | 0.03054           | 5.56234         | 5.56234               | M up vs W                           | 3.58926         | 30.8658          | 64.4961    | 1        |
| cg12382864  | PIK3AP1                       | 0.05325               | 0.01779           | 0.19514         | -5.12443              | M down vs W                         | 3.87435         | 16.674           | 23.6703    | 1        |
| cg26653725  | MAP2K3                        | 0.0534                | 0.02173           | 4.38266         | 4.38266               | M up vs W                           | 3.63843         | 18.5221          | 35.6347    | 1        |
| cg00257789  | TTC15                         | 0.05357               | 0.0173            | 0.17897         | -5.58746              | M down vs W                         | 3.57995         | 24.6598          | 51.6622    | 1        |
| cg25599538  | UCP1                          | 0.05361               | 0.01804           | 0.24752         | -4.04007              | M down vs W                         | 3.5788          | 16.4919          | 34.5617    | 1        |
| cg22952678  | GNS                           | 0.05369               | 0.02113           | 0.3302          | -3.02843              | M down vs W                         | 3.5767          | 11.0295          | 23.1279    | 1        |
| cg02436004  | GATA2                         | 0.05373               | 0.01749           | 0.30346         | -3.29538              | M down vs W                         | 3.57566         | 11.8811          | 24.9208    | 1        |
| cg05121480  | SST                           | 0.05382               | 0.01974           | 0.28445         | -3.51561              | M down vs W                         | 3.57309         | 13.8157          | 28.9994    | 1        |
| cg21881253  | MIR34B;BTG4;MIR34C            | 0.05383               | 0.01746           | 0.13523         | -7.39472              | M down vs W                         | 3.57288         | 33.3919          | 70.0944    | 1        |
| cg05475934  | APBB1IP;APBB1IP               | 0.05393               | 0.01874           | 0.23656         | -4.2272               | M down vs W                         | 3.56995         | 17.7878          | 37.3699    | 1        |
| cg06776915  | GSTO2;GSTO2                   | 0.05397               | 0.02448           | 0.27947         | -3.57819              | M down vs W                         | 3.56896         | 15.446           | 32.4591    | 1        |
| cg10282807  | ACRBP;ACRBP                   | 0.05414               | 0.01828           | 0.29202         | -3.42449              | M down vs W                         | 3.56431         | 12.8288          | 26.9944    | 1        |
| cg11676902  | PRDM13                        | 0.05443               | 0.0206            | 3.76205         | 3.76205               | M up vs W                           | 3.5564          | 15.5259          | 32.7422    | 1        |
| cg10662395  | HCN2                          | 0.05445               | 0.0203            | 3.57429         | 3.57429               | M up vs W                           | 3.55581         | 14.2658          | 30.0898    | 1        |
| cg00481951  | SST                           | 0.05458               | 0.01809           | 0.2686          | -3.72308              | M down vs W                         | 3.5523          | 14.5239          | 30.6644    | 1        |
| cg06088084  | BMS1P1;BMS1P5                 | 0.05486               | 0.01844           | 0.22458         | -4.4527               | M down vs W                         | 3.82375         | 13.9477          | 20.0621    | 1        |
| cg17370616  | RPL13AP3                      | 0.05497               | 0.04022           | 0.25088         | -3.986                | M down vs W                         | 3.54185         | 22.3608          | 47.3499    | 1        |
| cg25745379  | GPR12                         | 0.05508               | 0.01867           | 7.51267         | 7.51267               | M up vs W                           | 3.53887         | 34.4581          | 73.0276    | 1        |
| cg20723355  | FBXO39                        | 0.05511               | 0.02007           | 0.12518         | -7.98876              | M down vs W                         | 3.53809         | 37.6153          | 79.7364    | 1        |
| cg07187103  | LDHA;LDHA;LDHA;LDHA;LDHA      | 0.05518               | 0.02076           | 8.08543         | 8.08543               | M up vs W                           | 3.53623         | 38.5307          | 81.72      | 1        |
| cg11096000  | KCNQ1;KCNQ1                   | 0.05523               | 0.03304           | 3.32836         | 3.32836               | M up vs W                           | 3.53498         | 15.4441          | 32.767     | 1        |
| cg18181229  | PBX1                          | 0.05537               | 0.01819           | 0.29429         | -3.398                | M down vs W                         | 3.53136         | 12.5285          | 26.6083    | 1        |
| cg24749362  | TCP10L2                       | 0.05553               | 0.02311           | 3.29252         | 3.29252               | M up vs W                           | 3.52712         | 13.032           | 27.7111    | 1        |
| cg08657228  | DEFB128                       | 0.05582               | 0.0292            | 0.30829         | -3.24374              | M down vs W                         | 3.51948         | 13.9624          | 29.7539    | 1        |
| cg07472199  | ZNF843                        | 0.05588               | 0.03245           | 3.66698         | 3.66698               | M up vs W                           | 3.51789         | 17.8069          | 37.9636    | 1        |
| cg02426623  | TSPAN9;TSPAN9                 | 0.05588               | 0.01841           | 3.01226         | 3.01226               | M up vs W                           | 3.5177          | 10.1879          | 21.7214    | 1        |
| cg27087956  | PRDM6                         | 0.05598               | 0.04579           | 0.31091         | -3.21636              | M down vs W                         | 3.51513         | 16.8419          | 35.9345    | 1        |



| Probeset ID | UCSC_REFGENE_NAME                   | p-value (H3.3 Status) | p-value (M vs. W) | Ratio (M vs. W) | Fold-Change (M vs. W) | Fold-Change (M vs. W) (Description) | F (H3.3 Status) | SS (H3.3 Status) | SS (Error) | F(Error) |
|-------------|-------------------------------------|-----------------------|-------------------|-----------------|-----------------------|-------------------------------------|-----------------|------------------|------------|----------|
| cg14032025  | ZFP64                               | 0.05606               | 0.02549           | 4.88215         | 4.88215               | M up vs W                           | 3.51315         | 23.9116          | 51.0473    | 1        |
| cg11410731  | DHX15;DHX15                         | 0.05606               | 0.01893           | 0.32249         | -3.10086              | M down vs W                         | 3.62574         | 9.4247           | 16.896     | 1        |
| cg12204258  | ZIC1                                | 0.05626               | 0.02071           | 5.33552         | 5.33552               | M up vs W                           | 3.50792         | 24.5073          | 52.3971    | 1        |
| cg13677149  | EVX1                                | 0.05626               | 0.01827           | 0.12634         | -7.9149               | M down vs W                         | 3.50785         | 35.6511          | 76.2244    | 1        |
| cg22174681  | PRKCZ;PRKCZ                         | 0.05647               | 0.01851           | 4.06702         | 4.06702               | M up vs W                           | 3.50245         | 16.4536          | 35.2331    | 1        |
| cg20550012  | PTPRN2;PTPRN2;PTPRN2                | 0.05671               | 0.03561           | 5.11075         | 5.11075               | M up vs W                           | 3.49619         | 29.061           | 62.3414    | 1        |
| cg17888563  | RPTOR;RPTOR                         | 0.05677               | 0.02271           | 0.30738         | -3.25334              | M down vs W                         | 3.49464         | 12.5659          | 26.9682    | 1        |
| cg25813864  | RAPGEFL1                            | 0.05693               | 0.02097           | 3.02279         | 3.02279               | M up vs W                           | 3.49036         | 10.6957          | 22.9827    | 1        |
| cg00915663  | ELF1                                | 0.05722               | 0.01884           | 0.32873         | -3.04199              | M down vs W                         | 3.53399         | 9.64264          | 19.0998    | 1        |
| cg17349753  | RTN4RL2                             | 0.05727               | 0.02801           | 0.32396         | -3.08677              | M down vs W                         | 3.85888         | 7.87952          | 10.2096    | 1        |
| cg18490616  | THNSL2                              | 0.05737               | 0.02272           | 0.26973         | -3.70748              | M down vs W                         | 3.47923         | 15.4397          | 33.2825    | 1        |
| cg07358015  | INTS9;HMBOX1;INTS9;HMBOX1           | 0.05747               | 0.01899           | 0.25367         | -3.94214              | M down vs W                         | 3.52752         | 14.6781          | 29.1272    | 1        |
| cg08136432  | GALNS                               | 0.05762               | 0.0189            | 0.17995         | -5.55706              | M down vs W                         | 3.47277         | 24.5726          | 53.0684    | 1        |
| cg05839762  | HLA-A                               | 0.05789               | 0.01909           | 6.7044          | 6.7044                | M up vs W                           | 3.51654         | 28.2121          | 56.1588    | 1        |
| cg05347845  | ACTA1                               | 0.05814               | 0.01952           | 0.10357         | -9.65571              | M down vs W                         | 3.45964         | 43.325           | 93.9224    | 1        |
| cg13031432  | NDRG4;NDRG4;NDRG4                   | 0.05816               | 0.02479           | 3.54771         | 3.54771               | M up vs W                           | 3.8316          | 10.0183          | 13.0733    | 1        |
| cg20801476  | EVX1                                | 0.05822               | 0.02389           | 0.32172         | -3.10829              | M down vs W                         | 3.45775         | 11.7259          | 25.4339    | 1        |
| cg01281911  | FOXE3                               | 0.05826               | 0.01975           | 0.22667         | -4.4117               | M down vs W                         | 3.45665         | 18.6315          | 40.4254    | 1        |
| cg16281276  | CYB5R2                              | 0.05829               | 0.01928           | 0.09109         | -10.9777              | M down vs W                         | 3.45596         | 48.0846          | 104.351    | 1        |
| cg01740135  | PPP1R2P9                            | 0.05837               | 0.019             | 0.10264         | -9.74238              | M down vs W                         | 3.45403         | 43.1519          | 93.6991    | 1        |
| cg24415565  | LOC148189                           | 0.05838               | 0.03334           | 0.21158         | -4.72637              | M down vs W                         | 3.63319         | 20.4126          | 33.7102    | 1        |
| cg04681554  | EVX1                                | 0.05855               | 0.0193            | 0.22275         | -4.48925              | M down vs W                         | 3.44933         | 18.862           | 41.0123    | 1        |
| cg27364741  | OTX1                                | 0.0586                | 0.0197            | 0.24957         | -4.00691              | M down vs W                         | 3.4482          | 16.2389          | 35.3204    | 1        |
| cg07788369  | DLX6AS                              | 0.05868               | 0.02079           | 0.33214         | -3.01074              | M down vs W                         | 3.44611         | 10.448           | 22.7387    | 1        |
| cg06095270  | PRDM13                              | 0.05869               | 0.02536           | 3.26317         | 3.26317               | M up vs W                           | 3.44581         | 13.0218          | 28.3427    | 1        |
| cg15221604  | ROBO3                               | 0.05874               | 0.02608           | 0.09091         | -11                   | M down vs W                         | 3.44476         | 54.1279          | 117.848    | 1        |
| cg06463958  | T                                   | 0.05879               | 0.01944           | 0.05579         | -17.9241              | M down vs W                         | 3.4932          | 64.927           | 130.107    | 1        |
| cg19831706  | NUDT16P;NUDT16P                     | 0.05883               | 0.01959           | 0.31874         | -3.13734              | M down vs W                         | 3.4425          | 10.9762          | 23.9134    | 1        |
| cg18158151  | C2orf74;C2orf74                     | 0.0589                | 0.02133           | 0.32318         | -3.09422              | M down vs W                         | 3.44071         | 11.0667          | 24.1231    | 1        |
| cg26512469  | MCF2L;MCF2L                         | 0.05918               | 0.03736           | 0.23056         | -4.33728              | M down vs W                         | 3.4339          | 23.597           | 51.5383    | 1        |
| cg20017590  | SPTBN1;SPTBN1                       | 0.05933               | 0.01974           | 3.42289         | 3.42289               | M up vs W                           | 3.43021         | 12.7044          | 27.7777    | 1        |
| cg05700339  | CIDEA;CIDEA                         | 0.05936               | 0.03719           | 0.30575         | -3.27066              | M down vs W                         | 3.537           | 13.4339          | 24.6876    | 1        |
| cg12835924  | ZNF239;ZNF239;ZNF239;ZNF239         | 0.05938               | 0.0203            | 0.14411         | -6.93924              | M down vs W                         | 3.79521         | 21.3022          | 28.0646    | 1        |
| cg08169659  | TMEM52                              | 0.05954               | 0.02167           | 3.34256         | 3.34256               | M up vs W                           | 3.5325          | 11.0189          | 20.2755    | 1        |
| cg26335127  | LGALS3                              | 0.05957               | 0.01984           | 3.77168         | 3.77168               | M up vs W                           | 3.4243          | 14.7915          | 32.3967    | 1        |
| cg18855466  | SPATS2L;SPATS2L;SPATS2L;SPA         | 0.05976               | 0.02072           | 7.54474         | 7.54474               | M up vs W                           | 3.5958          | 26.5448          | 44.2931    | 1        |
| cg00081019  | SDCCAG8;AKT3                        | 0.05984               | 0.01978           | 3.09848         | 3.09848               | M up vs W                           | 3.41758         | 10.7011          | 23.484     | 1        |
| cg05364122  | SH2D2A;SH2D2A;SH2D2A;SH2D           | 0.05989               | 0.03113           | 0.31423         | -3.18239              | M down vs W                         | 3.41644         | 13.4814          | 29.5954    | 1        |
| cg01738022  | ADCY9                               | 0.05993               | 0.02015           | 0.28357         | -3.52653              | M down vs W                         | 3.41556         | 13.3765          | 29.3725    | 1        |
| cg17662493  | SMC1B                               | 0.05993               | 0.02644           | 9.25186         | 9.25186               | M up vs W                           | 3.41537         | 46.4641          | 102.033    | 1        |
| cg13071306  | GPR153                              | 0.06001               | 0.01978           | 3.49099         | 3.49099               | M up vs W                           | 3.41351         | 13.0614          | 28.6978    | 1        |
| cg07976644  | TTC22;TTC22;TTC22;TTC22             | 0.06008               | 0.01998           | 0.10527         | -9.49967              | M down vs W                         | 3.4608          | 39.5588          | 80.0137    | 1        |
| cg01102073  | GATA2;GATA2;GATA2                   | 0.06014               | 0.03756           | 0.19196         | -5.20941              | M down vs W                         | 3.41046         | 29.7249          | 65.3687    | 1        |
| cg11329827  | HCG9                                | 0.06019               | 0.02614           | 0.31279         | -3.19708              | M down vs W                         | 3.40918         | 12.5969          | 27.7125    | 1        |
| cg04913057  | ETNK2                               | 0.06034               | 0.02011           | 3.15364         | 3.15364               | M up vs W                           | 3.51174         | 9.43296          | 17.4598    | 1        |
| cg26577231  | KIAA1683;KIAA1683;KIAA1683          | 0.06036               | 0.02407           | 4.33971         | 4.33971               | M up vs W                           | 3.40503         | 19.4019          | 42.735     | 1        |
| cg27258394  | CSMD1                               | 0.06038               | 0.0198            | 4.37825         | 4.37825               | M up vs W                           | 3.40457         | 18.1812          | 40.0517    | 1        |
| cg26241806  | APBB1IP                             | 0.06041               | 0.02575           | 0.2651          | -3.77213              | M down vs W                         | 3.40397         | 16.3117          | 35.9398    | 1        |
| cg20744625  | EGR2                                | 0.06043               | 0.02486           | 0.14061         | -7.11207              | M down vs W                         | 3.45212         | 32.71            | 66.3274    | 1        |
| cg25449440  | ZIC4;ZIC4;ZIC4                      | 0.06061               | 0.02197           | 5.57299         | 5.57299               | M up vs W                           | 3.39913         | 25.584           | 56.4496    | 1        |
| cg13728115  | BCOR;BCOR                           | 0.06068               | 0.02306           | 3.11471         | 3.11471               | M up vs W                           | 3.39746         | 11.402           | 25.1703    | 1        |
| cg22238122  | PBX1                                | 0.06069               | 0.01998           | 0.30465         | -3.28251              | M down vs W                         | 3.39711         | 11.7951          | 26.0408    | 1        |
| cg22221831  | MGP                                 | 0.0608                | 0.02325           | 3.17904         | 3.17904               | M up vs W                           | 3.3945          | 11.8432          | 26.1671    | 1        |
| cg13098428  | RPTOR;RPTOR                         | 0.06093               | 0.01994           | 0.24166         | -4.13801              | M down vs W                         | 3.39131         | 16.7959          | 37.1447    | 1        |
| cg11983867  | MGC87042;MGC87042;MGC87042;MGC87042 | 0.06098               | 0.04138           | 0.10564         | -9.4661               | M down vs W                         | 3.49559         | 50.2311          | 93.4039    | 1        |

| Probeset ID | UCSC_REFGENE_NAME                                       | p-value<br>(H3.3<br>Status) | p-value<br>(M vs.<br>W) | Ratio (M<br>vs. W) | Fold-<br>Change (M<br>vs. W) | Fold-Change (M<br>vs. W)<br>(Description) | F (H3.3<br>Status) | SS (H3.3<br>Status) | SS (Error) | F(Error) |
|-------------|---------------------------------------------------------|-----------------------------|-------------------------|--------------------|------------------------------|-------------------------------------------|--------------------|---------------------|------------|----------|
| cg02164046  | SST;SST                                                 | 0.06107                     | 0.02599                 | 0.1148             | -8.71111                     | M down vs W                               | 3.38809            | 43.3182             | 95.8906    | 1        |
| cg22290648  | SYCN                                                    | 0.06113                     | 0.02151                 | 0.33133            | -3.01814                     | M down vs W                               | 3.38674            | 10.4527             | 23.1476    | 1        |
| cg13482308  | PAX5                                                    | 0.06119                     | 0.02041                 | 0.08645            | -11.568                      | M down vs W                               | 3.38532            | 50.2737             | 111.379    | 1        |
| cg12634932  | CCL28                                                   | 0.06124                     | 0.02461                 | 0.11772            | -8.49446                     | M down vs W                               | 3.43217            | 38.5155             | 78.5534    | 1        |
| cg16993043  | NR5A2;NR5A2                                             | 0.06164                     | 0.0403                  | 0.30771            | -3.24986                     | M down vs W                               | 3.37457            | 15.4926             | 34.4325    | 1        |
| cg13354893  | C2CD2                                                   | 0.06187                     | 0.02105                 | 4.64948            | 4.64948                      | M up vs W                                 | 3.36922            | 19.953              | 44.4161    | 1        |
| cg08012217  | SHISA6                                                  | 0.06191                     | 0.02146                 | 3.0661             | 3.0661                       | M up vs W                                 | 3.36825            | 10.6836             | 23.7888    | 1        |
| cg20114732  | T                                                       | 0.06216                     | 0.02177                 | 0.07775            | -12.862                      | M down vs W                               | 3.36253            | 55.7521             | 124.353    | 1        |
| cg07748741  | UBTD1                                                   | 0.06227                     | 0.02149                 | 3.44304            | 3.44304                      | M up vs W                                 | 3.35995            | 12.9855             | 28.9859    | 1        |
| cg19759549  | GATA2                                                   | 0.06231                     | 0.02383                 | 0.27869            | -3.58823                     | M down vs W                               | 3.35891            | 14.4426             | 32.2485    | 1        |
| cg10184889  | CA3                                                     | 0.06238                     | 0.02483                 | 0.31361            | -3.18866                     | M down vs W                               | 3.35732            | 12.0922             | 27.0131    | 1        |
| cg12892506  | ZIC4;ZIC4;ZIC4                                          | 0.06248                     | 0.02204                 | 8.59242            | 8.59242                      | M up vs W                                 | 3.35498            | 39.6304             | 88.5931    | 1        |
| cg27125972  | PRDM13                                                  | 0.06291                     | 0.02119                 | 6.63886            | 6.63886                      | M up vs W                                 | 3.34506            | 30.1349             | 67.5658    | 1        |
| cg02124746  | S1PR3                                                   | 0.06303                     | 0.02317                 | 3.21473            | 3.21473                      | M up vs W                                 | 3.34234            | 11.8716             | 26.6392    | 1        |
| cg12142521  | ACOXL;ACOXL;ACOXL                                       | 0.06303                     | 0.02069                 | 0.18859            | -5.30262                     | M down vs W                               | 3.34229            | 23.1714             | 51.996     | 1        |
| cg00457403  | SST                                                     | 0.06306                     | 0.02079                 | 0.31372            | -3.18757                     | M down vs W                               | 3.34169            | 11.2078             | 25.1545    | 1        |
| cg16364709  | ERN2                                                    | 0.06315                     | 0.02217                 | 0.26951            | -3.71044                     | M down vs W                               | 3.33953            | 14.694              | 33.0001    | 1        |
| cg24575083  | CYB5R2                                                  | 0.06326                     | 0.02269                 | 0.15001            | -6.66637                     | M down vs W                               | 3.33703            | 31.0204             | 69.7186    | 1        |
| cg18497394  | TM2D2;TM2D2;ADAM9;ADAM9<br>;ADAM9;TM2D2;TM2D2;ADAM<br>9 | 0.06341                     | 0.02511                 | 7.61298            | 7.61298                      | M up vs W                                 | 5.03475            | 12.3594             | 6.13702    | 1        |
| cg10214447  | DOCK1                                                   | 0.06343                     | 0.02095                 | 3.37689            | 3.37689                      | M up vs W                                 | 3.33325            | 12.356              | 27.8017    | 1        |
| cg12698349  | CUL3                                                    | 0.06359                     | 0.04515                 | 0.24869            | -4.02101                     | M down vs W                               | 3.49705            | 18.2204             | 31.2613    | 1        |
| cg21864016  | C14orf132                                               | 0.06374                     | 0.02489                 | 3.28279            | 3.28279                      | M up vs W                                 | 3.32623            | 12.6009             | 28.4125    | 1        |
| cg06769296  | LOC100128239                                            | 0.06375                     | 0.02267                 | 3.08841            | 3.08841                      | M up vs W                                 | 3.32596            | 10.9214             | 24.6276    | 1        |
| cg00501169  | NBPF4                                                   | 0.06386                     | 0.0223                  | 4.45565            | 4.45565                      | M up vs W                                 | 3.32351            | 19.0345             | 42.9542    | 1        |
| cg05988603  | NCRNA00171                                              | 0.06395                     | 0.02434                 | 3.07059            | 3.07059                      | M up vs W                                 | 3.36803            | 10.3459             | 21.5026    | 1        |
| cg05344495  | C19orf77                                                | 0.06399                     | 0.02734                 | 4.23905            | 4.23905                      | M up vs W                                 | 3.32059            | 19.3053             | 43.6037    | 1        |
| cg23983726  | AK3L1;AK3L1;AK3L1                                       | 0.06402                     | 0.0211                  | 4.2105             | 4.2105                       | M up vs W                                 | 3.31991            | 17.222              | 38.9063    | 1        |
| cg15798385  | EVX1                                                    | 0.06406                     | 0.03048                 | 0.22151            | -4.51451                     | M down vs W                               | 3.319              | 22.001              | 49.7159    | 1        |
| cg03056526  | EVX1                                                    | 0.06409                     | 0.02139                 | 0.27324            | -3.65982                     | M down vs W                               | 3.31823            | 14.0952             | 31.8585    | 1        |
| cg01203766  | PSORS1C1                                                | 0.06416                     | 0.0212                  | 4.11175            | 4.11175                      | M up vs W                                 | 3.31662            | 16.6714             | 37.6996    | 1        |
| cg20696674  | PHACTR4;PHACTR4                                         | 0.06418                     | 0.04438                 | 3.67312            | 3.67312                      | M up vs W                                 | 3.31622            | 19.4126             | 43.9039    | 1        |
| cg10328548  | SS18L1                                                  | 0.06442                     | 0.0212                  | 4.87359            | 4.87359                      | M up vs W                                 | 3.3108             | 20.8874             | 47.3165    | 1        |
| cg06452665  | TNFSF11;TNFSF11;TNFSF11<br>ARHGFE7;ARHGFE7;ARHGFE7;A    | 0.06443                     | 0.02907                 | 0.23513            | -4.25289                     | M down vs W                               | 3.31055            | 19.8366             | 44.9395    | 1        |
| cg23521294  | RHGFE7                                                  | 0.06444                     | 0.02201                 | 3.31752            | 3.31752                      | M up vs W                                 | 3.31042            | 12.1511             | 27.5291    | 1        |
| cg14620572  | GPR144                                                  | 0.06455                     | 0.02135                 | 0.24366            | -4.1041                      | M down vs W                               | 3.30798            | 16.6298             | 37.7039    | 1        |
| cg25705486  | LOC100192426;PTPRM;PTPRM                                | 0.06457                     | 0.03179                 | 3.71023            | 3.71023                      | M up vs W                                 | 3.30738            | 16.8927             | 38.3068    | 1        |
| cg14849798  | GLT8D2                                                  | 0.06479                     | 0.02139                 | 0.31299            | -3.19498                     | M down vs W                               | 3.30263            | 11.2451             | 25.5366    | 1        |
| cg07540103  | FBX039                                                  | 0.06496                     | 0.03195                 | 0.31116            | -3.21374                     | M down vs W                               | 3.29869            | 13.3867             | 30.4364    | 1        |
| cg22487177  | MOCOS                                                   | 0.06506                     | 0.02144                 | 0.30931            | -3.23306                     | M down vs W                               | 3.29657            | 11.4663             | 26.0869    | 1        |
| cg24393673  | OLFM3                                                   | 0.06508                     | 0.02189                 | 0.18903            | -5.2903                      | M down vs W                               | 3.29615            | 23.2946             | 53.0041    | 1        |
| cg24976563  | DCAF11;DCAF11;DCAF11;DCAF1<br>1;DCAF11                  | 0.06513                     | 0.02202                 | 0.14893            | -6.71477                     | M down vs W                               | 3.29498            | 30.4989             | 69.4212    | 1        |
| cg19149222  | INO80B                                                  | 0.06519                     | 0.0263                  | 0.20124            | -4.96922                     | M down vs W                               | 3.39353            | 19.8274             | 37.9775    | 1        |
| cg25622366  | OTX1                                                    | 0.06521                     | 0.02234                 | 0.14886            | -6.71794                     | M down vs W                               | 3.29329            | 30.6757             | 69.8596    | 1        |
| cg06153925  | RPTOR;RPTOR                                             | 0.06529                     | 0.02191                 | 3.70488            | 3.70488                      | M up vs W                                 | 3.29142            | 14.3826             | 32.7729    | 1        |
| cg01429933  | PLEKHG5;PLEKHG5                                         | 0.0654                      | 0.02625                 | 3.59047            | 3.59047                      | M up vs W                                 | 3.28909            | 14.7274             | 33.5824    | 1        |
| cg10528424  | SYT8                                                    | 0.06551                     | 0.0216                  | 6.38725            | 6.38725                      | M up vs W                                 | 3.28664            | 28.6268             | 65.3254    | 1        |
| cg10305311  | CLDN10;CLDN10;CLDN10                                    | 0.06556                     | 0.02275                 | 0.11016            | -9.07812                     | M down vs W                               | 3.33117            | 38.4877             | 80.8767    | 1        |
| cg00032419  | TP53I13                                                 | 0.06579                     | 0.03903                 | 0.33021            | -3.02833                     | M down vs W                               | 3.52085            | 9.56711             | 14.945     | 1        |
| cg15309006  | CHP2;CHP2                                               | 0.06582                     | 0.02487                 | 0.24905            | -4.01523                     | M down vs W                               | 3.27995            | 16.9859             | 38.8402    | 1        |
| cg11852646  | MAD1L1;MAD1L1;MAD1L1                                    | 0.06594                     | 0.02267                 | 3.01419            | 3.01419                      | M up vs W                                 | 3.27719            | 10.3021             | 23.5768    | 1        |
| cg16021909  | TRIM58                                                  | 0.06611                     | 0.02253                 | 0.31515            | -3.17306                     | M down vs W                               | 3.27349            | 11.2416             | 25.7561    | 1        |
| cg07807575  | AHR                                                     | 0.06658                     | 0.02314                 | 3.9865             | 3.9865                       | M up vs W                                 | 3.26333            | 16.2482             | 37.3428    | 1        |
| cg13009819  | HLA-DQA1                                                | 0.06658                     | 0.02306                 | 4.13728            | 4.13728                      | M up vs W                                 | 3.26332            | 17.1086             | 39.3203    | 1        |
| cg00350003  | KCNJ12                                                  | 0.06666                     | 0.04                    | 0.31633            | -3.16131                     | M down vs W                               | 3.26174            | 14.2301             | 32.7204    | 1        |
| cg17291435  | FHL2;FHL2;FHL2;FHL2;FHL<br>2;FHL2                       | 0.06666                     | 0.02467                 | 0.0491             | -20.3681                     | M down vs W                               | 3.30661            | 73.711              | 156.044    | 1        |



| Probeset ID | UCSC_REFGENE_NAME                                                                       | p-value (H3.3 Status) | p-value (M vs. W) | Ratio (M vs. W) | Fold-Change (M vs. W) | Fold-Change (M vs. W) (Description) | F (H3.3 Status) | SS (H3.3 Status) | SS (Error) | F(Error) |
|-------------|-----------------------------------------------------------------------------------------|-----------------------|-------------------|-----------------|-----------------------|-------------------------------------|-----------------|------------------|------------|----------|
| cg25361454  | ADAP1                                                                                   | 0.07327               | 0.02447           | 4.55635         | 4.55635               | M up vs W                           | 3.12685         | 19.148           | 45.928     | 1        |
| cg18791121  | CYB5R2;CYB5R2                                                                           | 0.07338               | 0.03292           | 0.14804         | -6.755                | M down vs W                         | 3.12473         | 34.4             | 82.567     | 1        |
| cg20657098  | orf7                                                                                    | 0.07353               | 0.03144           | 0.32033         | -3.12175              | M down vs W                         | 3.21197         | 10.4349          | 21.1168    | 1        |
| cg17103088  | TBXA2R;TBXA2R                                                                           | 0.07353               | 0.02563           | 3.33374         | 3.33374               | M up vs W                           | 3.12179         | 12.2812          | 29.5053    | 1        |
| cg23413924  | DUOX1;DUOX1                                                                             | 0.07389               | 0.04001           | 0.16296         | -6.13653              | M down vs W                         | 3.11491         | 33.7708          | 81.3126    | 1        |
| cg23847712  | DRD5                                                                                    | 0.07396               | 0.03039           | 0.15607         | -6.40724              | M down vs W                         | 3.11363         | 31.3044          | 75.4051    | 1        |
| cg07120369  | SST                                                                                     | 0.07425               | 0.03059           | 0.32556         | -3.07162              | M down vs W                         | 3.10812         | 11.4388          | 27.6021    | 1        |
| cg26157385  | TRIM58                                                                                  | 0.07448               | 0.03988           | 0.26117         | -3.82897              | M down vs W                         | 3.10374         | 18.3989          | 44.4599    | 1        |
| cg17129755  | C11orf60;C11orf60                                                                       | 0.07464               | 0.03335           | 0.28729         | -3.48082              | M down vs W                         | 3.65268         | 7.98509          | 8.74436    | 1        |
| cg13320555  | PDCD5                                                                                   | 0.07475               | 0.03858           | 0.31856         | -3.13911              | M down vs W                         | 3.3993          | 8.91173          | 13.1082    | 1        |
| cg19927257  | RUSC1;RUSC1;RUSC1;C1orf104;RUSC1                                                        | 0.07478               | 0.03427           | 3.17663         | 3.17663               | M up vs W                           | 3.13872         | 11.8478          | 26.423     | 1        |
| cg17515767  | ADPRHL1;ADPRHL1                                                                         | 0.0751                | 0.02647           | 3.74337         | 3.74337               | M up vs W                           | 3.09202         | 14.812           | 35.928     | 1        |
| cg16174680  | NKX6-3                                                                                  | 0.07522               | 0.02672           | 6.88192         | 6.88192               | M up vs W                           | 3.49672         | 21.1223          | 27.1828    | 1        |
| cg03002848  | VENTX                                                                                   | 0.0755                | 0.04379           | 0.13665         | -7.3178               | M down vs W                         | 3.12497         | 39.1871          | 87.78      | 1        |
| cg06098276  | TK1                                                                                     | 0.07562               | 0.02639           | 3.07688         | 3.07688               | M up vs W                           | 3.08213         | 10.6919          | 26.0175    | 1        |
| cg16401346  | MEX3C;MEX3C                                                                             | 0.07565               | 0.02741           | 3.01328         | 3.01328               | M up vs W                           | 3.29455         | 7.53481          | 12.5788    | 1        |
| cg19099049  | A6D;SEMA6D;SEMA6D                                                                       | 0.07568               | 0.02912           | 0.27926         | -3.58088              | M down vs W                         | 3.08106         | 14.3455          | 34.9201    | 1        |
| cg01215061  | TGIF2LX;TGIF2LX                                                                         | 0.07582               | 0.02544           | 3.18452         | 3.18452               | M up vs W                           | 3.07845         | 11.1727          | 27.22      | 1        |
| cg25320221  | SMG7;SMG7;SMG7                                                                          | 0.07585               | 0.03751           | 0.22075         | -4.52994              | M down vs W                         | 4.514           | 9.30418          | 5.15296    | 1        |
| cg01295399  | SLC18A3;CHAT;CHAT;CHAT                                                                  | 0.07591               | 0.03221           | 0.30903         | -3.23596              | M down vs W                         | 3.0768          | 12.6798          | 30.9081    | 1        |
| cg15700009  | LDHA;LDHA;LDHA;LDHA;LDHA                                                                | 0.07641               | 0.03995           | 3.91794         | 3.91794               | M up vs W                           | 3.06765         | 18.8281          | 46.0323    | 1        |
| cg23783695  | PRDM13                                                                                  | 0.07655               | 0.03229           | 3.21372         | 3.21372               | M up vs W                           | 3.06505         | 12.4964          | 30.5779    | 1        |
| cg21944491  | LTBP4;LTBP4;LTBP4                                                                       | 0.07655               | 0.02693           | 4.05825         | 4.05825               | M up vs W                           | 3.06505         | 16.6536          | 40.7505    | 1        |
| cg19336959  | TMEM176B;TMEM176B;TMEM176B                                                              | 0.07663               | 0.03839           | 0.23804         | -4.20092              | M down vs W                         | 3.06354         | 20.3946          | 49.9291    | 1        |
| cg10724086  | FOXA1                                                                                   | 0.07667               | 0.02696           | 0.31074         | -3.2181               | M down vs W                         | 3.06283         | 11.5922          | 28.386     | 1        |
| cg23891273  | MYBPC1;MYBPC1;MYBPC1;MYBPC1                                                             | 0.077                 | 0.03533           | 0.14387         | -6.95067              | M down vs W                         | 3.05665         | 35.7645          | 87.7543    | 1        |
| cg19753526  | FHL2;FHL2;FHL2;FHL2;FHL2;FHL2                                                           | 0.07714               | 0.02694           | 0.154           | -6.49334              | M down vs W                         | 3.0542          | 29.606           | 72.7014    | 1        |
| cg22978620  | GATA2                                                                                   | 0.07715               | 0.02638           | 0.19733         | -5.06778              | M down vs W                         | 3.05403         | 22.0849          | 54.2356    | 1        |
| cg17575314  | HK1;HK1;HK1;HK1;HK1                                                                     | 0.07716               | 0.03456           | 4.61762         | 4.61762               | M up vs W                           | 3.05375         | 22.0283          | 54.1015    | 1        |
| cg20749769  | ST14                                                                                    | 0.0774                | 0.03287           | 0.18579         | -5.38257              | M down vs W                         | 3.04936         | 26.046           | 64.0611    | 1        |
| cg00756032  | MYF6                                                                                    | 0.07814               | 0.03337           | 0.30779         | -3.24895              | M down vs W                         | 3.03607         | 12.794           | 31.6049    | 1        |
| cg13980719  | TNP1                                                                                    | 0.07841               | 0.02688           | 3.80694         | 3.80694               | M up vs W                           | 3.03121         | 14.9898          | 37.0886    | 1        |
| cg15619820  | PRDM16;PRDM16                                                                           | 0.07844               | 0.03575           | 3.24451         | 3.24451               | M up vs W                           | 3.03059         | 13.1353          | 32.5067    | 1        |
| cg09916651  | CUX2                                                                                    | 0.07855               | 0.03202           | 3.12071         | 3.12071               | M up vs W                           | 3.02872         | 11.6917          | 28.9521    | 1        |
| cg04572930  | FOXP1                                                                                   | 0.07864               | 0.03429           | 4.85477         | 4.85477               | M up vs W                           | 3.02706         | 23.209           | 57.5038    | 1        |
| cg11176493  | WNT3A                                                                                   | 0.0787                | 0.02726           | 0.33165         | -3.01523              | M down vs W                         | 3.02609         | 10.2595          | 25.4276    | 1        |
| cg14733680  | NHLH2;NHLH2                                                                             | 0.07872               | 0.0406            | 0.29531         | -3.38623              | M down vs W                         | 3.02568         | 14.9276          | 37.0022    | 1        |
| cg19670870  | C6orf141;C6orf141                                                                       | 0.07885               | 0.03181           | 0.3199          | -3.12595              | M down vs W                         | 3.02336         | 11.6721          | 28.9547    | 1        |
| cg23743627  | SNRK;SNRK                                                                               | 0.07897               | 0.02772           | 0.28672         | -3.48769              | M down vs W                         | 3.02114         | 13.2144          | 32.8049    | 1        |
| cg06688763  | CDK6;CDK6                                                                               | 0.07912               | 0.03106           | 0.27138         | -3.68482              | M down vs W                         | 3.01851         | 15.1023          | 37.5242    | 1        |
| cg24073023  | PTPN20B;PTPN20A;PTPN20B;PTPN20A;PTPN20A;PTPN20A;PTPN20A;PTPN20A;PTPN20B;PTPN20B;PTPN20A | 0.07915               | 0.03497           | 3.39732         | 3.39732               | M up vs W                           | 3.01797         | 13.9863          | 34.7574    | 1        |
| cg03595792  | PGM2L1                                                                                  | 0.07935               | 0.02872           | 3.71437         | 3.71437               | M up vs W                           | 3.09874         | 13.7132          | 28.7652    | 1        |
| cg06581175  | DLX6AS                                                                                  | 0.07948               | 0.03693           | 0.31955         | -3.12936              | M down vs W                         | 3.01211         | 12.448           | 30.9948    | 1        |
| cg08835985  | PDF;COG8                                                                                | 0.07959               | 0.02954           | 3.26978         | 3.26978               | M up vs W                           | 3.01029         | 12.1635          | 30.3048    | 1        |
| cg19675288  | T                                                                                       | 0.07964               | 0.02861           | 0.29791         | -3.35672              | M down vs W                         | 3.00945         | 12.534           | 31.2366    | 1        |
| cg20007643  | FLJ43663;FLJ43663                                                                       | 0.0797                | 0.03051           | 4.05382         | 4.05382               | M up vs W                           | 3.39471         | 11.4884          | 15.2289    | 1        |
| cg13690864  | HPSE2;HPSE2;HPSE2;HPSE2                                                                 | 0.0799                | 0.02732           | 0.21204         | -4.7162               | M down vs W                         | 3.00477         | 20.1371          | 50.2628    | 1        |
| cg22433798  | PRKAR1B;PRKAR1B;PRKAR1B;PRKAR1B;PRKAR1B;PRKAR1B                                         | 0.08003               | 0.02914           | 3.21674         | 3.21674               | M up vs W                           | 3.00252         | 11.7326          | 29.3069    | 1        |







| Probeset ID | UCSC_REFGENE_NAME                                                                                                                          | p-value (H3.3 Status) | p-value (M vs. W) | Ratio (M vs. W) | Fold-Change (M vs. W) | Fold-Change (M vs. W) (Description) | F (H3.3 Status) | SS (H3.3 Status) | SS (Error) | F(Error) |
|-------------|--------------------------------------------------------------------------------------------------------------------------------------------|-----------------------|-------------------|-----------------|-----------------------|-------------------------------------|-----------------|------------------|------------|----------|
| cg09789636  | TRIM58                                                                                                                                     | 0.09944               | 0.03703           | 0.31994         | -3.1256               | M down vs W                         | 2.70276         | 11.1585          | 30.9643    | 1        |
| cg18853435  | CTDSP1                                                                                                                                     | 0.09948               | 0.03935           | 7.39483         | 7.39483               | M up vs W                           | 2.70224         | 35.3574          | 98.1335    | 1        |
| cg08447739  | HTRA1                                                                                                                                      | 0.09952               | 0.04109           | 4.53604         | 4.53604               | M up vs W                           | 2.70178         | 20.5987          | 57.1808    | 1        |
| cg15824707  | DUOX2                                                                                                                                      | 0.0997                | 0.03993           | 0.25754         | -3.88286              | M down vs W                         | 2.69929         | 16.346           | 45.4174    | 1        |
| cg01188592  | RSPO4;RSPO4;RSPO4;RSPO4                                                                                                                    | 0.09989               | 0.03734           | 0.31324         | -3.19241              | M down vs W                         | 2.69666         | 11.5949          | 32.248     | 1        |
| cg03631131  | ZIC4;ZIC4;ZIC4                                                                                                                             | 0.10002               | 0.03726           | 3.4046          | 3.4046                | M up vs W                           | 2.69492         | 12.8956          | 35.8885    | 1        |
| cg03608167  | CXCR4;CXCR4                                                                                                                                | 0.10022               | 0.04873           | 3.95554         | 3.95554               | M up vs W                           | 2.69225         | 18.4223          | 51.3202    | 1        |
| cg25683069  | UHMK1                                                                                                                                      | 0.10024               | 0.03952           | 0.31406         | -3.18414              | M down vs W                         | 2.75978         | 10.0922          | 23.7696    | 1        |
| cg01309395  | HLA-DPB2                                                                                                                                   | 0.10027               | 0.0431            | 3.31914         | 3.31914               | M up vs W                           | 2.69154         | 13.2116          | 36.8144    | 1        |
| cg12385599  | LOC389493                                                                                                                                  | 0.10041               | 0.03677           | 0.21371         | -4.67926              | M down vs W                         | 2.68966         | 20.2963          | 56.5952    | 1        |
| cg07017114  | HLA-H                                                                                                                                      | 0.10046               | 0.03619           | 0.24327         | -4.11073              | M down vs W                         | 2.68889         | 16.9049          | 47.1519    | 1        |
| cg13643914  | QRFP                                                                                                                                       | 0.10052               | 0.03538           | 0.19412         | -4.15156              | M down vs W                         | 2.75573         | 19.5768          | 46.1762    | 1        |
| cg10842584  | MPL                                                                                                                                        | 0.10069               | 0.03985           | 0.18978         | -5.26939              | M down vs W                         | 2.75341         | 20.8138          | 49.1353    | 1        |
| cg12466610  | MOSC2                                                                                                                                      | 0.10082               | 0.03509           | 9.58152         | 9.58152               | M up vs W                           | 2.68412         | 42.5376          | 118.859    | 1        |
| cg24070123  | C6orf106;C6orf106                                                                                                                          | 0.10108               | 0.03823           | 3.77937         | 3.77937               | M up vs W                           | 2.68057         | 15.2842          | 42.764     | 1        |
| cg17393267  | FGF12;FGF12                                                                                                                                | 0.10147               | 0.03703           | 0.15937         | -6.27461              | M down vs W                         | 2.67539         | 28.686           | 80.4163    | 1        |
| cg11779273  | INTU                                                                                                                                       | 0.10173               | 0.04075           | 3.22317         | 3.22317               | M up vs W                           | 2.73875         | 10.5917          | 25.1378    | 1        |
| cg14167033  | SHANK2;SHANK2                                                                                                                              | 0.1027                | 0.03905           | 0.26918         | -3.71499              | M down vs W                         | 2.65897         | 14.9164          | 42.0739    | 1        |
| cg17404915  | OVOL2                                                                                                                                      | 0.10331               | 0.04859           | 0.206           | -4.85438              | M down vs W                         | 2.65099         | 23.9111          | 67.6479    | 1        |
| cg18610223  | BCOR;BCOR;BCOR;BCOR                                                                                                                        | 0.10335               | 0.04095           | 3.33879         | 3.33879               | M up vs W                           | 2.71637         | 11.1734          | 26.7368    | 1        |
| cg12307373  | DYNC2H1;DYNC2H1                                                                                                                            | 0.10344               | 0.04539           | 9.68571         | 9.68571               | M up vs W                           | 2.67959         | 44.4989          | 116.246    | 1        |
| cg14425863  | USH1C;USH1C                                                                                                                                | 0.10353               | 0.03686           | 0.21869         | -4.57279              | M down vs W                         | 2.64809         | 19.4123          | 54.9801    | 1        |
| cg26695837  | RELL1;RELL1                                                                                                                                | 0.10372               | 0.0399            | 0.2394          | -4.17709              | M down vs W                         | 2.64563         | 17.7867          | 50.4228    | 1        |
| cg10759817  | HSP90B3P                                                                                                                                   | 0.10385               | 0.03626           | 3.35104         | 3.35104               | M up vs W                           | 2.64393         | 12.1746          | 34.5356    | 1        |
| cg10985055  | TRIM26                                                                                                                                     | 0.10394               | 0.04205           | 0.27918         | -3.58189              | M down vs W                         | 2.6428          | 14.503           | 41.1579    | 1        |
| cg19998368  | C12orf56;C12orf56                                                                                                                          | 0.10406               | 0.03721           | 0.10969         | -9.11628              | M down vs W                         | 2.64119         | 41.1018          | 116.714    | 1        |
| cg07844931  | TEPP;TEPP                                                                                                                                  | 0.10409               | 0.03738           | 0.189           | -5.29094              | M down vs W                         | 2.64078         | 23.3992          | 66.4555    | 1        |
| cg16556145  | CLDN10;CLDN10;CLDN10                                                                                                                       | 0.10419               | 0.0446            | 0.08976         | -11.1407              | M down vs W                         | 2.63955         | 53.1741          | 151.089    | 1        |
| cg18768400  | CAPZA1;ST7L;ST7L;ST7L;ST7L                                                                                                                 | 0.10441               | 0.042             | 3.04921         | 3.04921               | M up vs W                           | 2.74365         | 8.43433          | 18.4447    | 1        |
| cg12208638  | ACTN3                                                                                                                                      | 0.10458               | 0.03655           | 0.20354         | -4.91297              | M down vs W                         | 2.63447         | 21.0987          | 60.0652    | 1        |
| cg02116639  | ZNF354B                                                                                                                                    | 0.10463               | 0.0392            | 8.0858          | 8.0858                | M up vs W                           | 2.93138         | 23.3486          | 35.8427    | 1        |
| cg03101422  | CXCR4                                                                                                                                      | 0.1047                | 0.04061           | 4.02663         | 4.02663               | M up vs W                           | 2.63297         | 16.9426          | 48.2608    | 1        |
| cg13912887  | NOXA1                                                                                                                                      | 0.1047                | 0.04235           | 3.1601          | 3.1601                | M up vs W                           | 2.63296         | 11.7899          | 33.5836    | 1        |
| cg12005760  | KLF11                                                                                                                                      | 0.10475               | 0.03967           | 0.32452         | -3.08146              | M down vs W                         | 2.6323          | 10.9376          | 31.1635    | 1        |
| cg13126530  | DIO3                                                                                                                                       | 0.10498               | 0.03724           | 0.25011         | -3.99832              | M down vs W                         | 2.62928         | 16.0954          | 45.9121    | 1        |
| cg02703002  | GABRA6                                                                                                                                     | 0.1052                | 0.04138           | 3.41185         | 3.41185               | M up vs W                           | 2.62651         | 13.2355          | 37.794     | 1        |
| cg10303487  | DPYS                                                                                                                                       | 0.1052                | 0.03712           | 0.03955         | -25.2836              | M down vs W                         | 2.65624         | 81.1942          | 213.971    | 1        |
| cg19946956  | RASA3                                                                                                                                      | 0.10528               | 0.04441           | 0.31615         | -3.16302              | M down vs W                         | 2.6255          | 12.0436          | 34.4036    | 1        |
| cg00795626  | BAT4;BAT4;CSNK2B                                                                                                                           | 0.10528               | 0.04063           | 0.22293         | -4.48566              | M down vs W                         | 3.15879         | 10.4812          | 11.6134    | 1        |
| cg04513185  | CXCR4                                                                                                                                      | 0.10529               | 0.04294           | 3.36682         | 3.36682               | M up vs W                           | 2.62538         | 13.1723          | 37.6298    | 1        |
| cg08483376  | EVX1                                                                                                                                       | 0.10531               | 0.03686           | 0.17354         | -5.76247              | M down vs W                         | 2.62514         | 25.5437          | 72.9782    | 1        |
| cg23816347  | CCDC37                                                                                                                                     | 0.10552               | 0.03784           | 0.25514         | -3.91946              | M down vs W                         | 2.6224          | 15.7081          | 44.9249    | 1        |
| cg25130993  | USH1C;USH1C                                                                                                                                | 0.10579               | 0.03729           | 0.25708         | -3.88978              | M down vs W                         | 2.61898         | 15.4105          | 44.1313    | 1        |
| cg18503260  | CA13                                                                                                                                       | 0.10602               | 0.04138           | 0.33315         | -3.00169              | M down vs W                         | 2.61604         | 10.5752          | 30.3184    | 1        |
| cg06248560  | BRUNOL4;BRUNOL4;BRUNOL4;<br>BRUNOL4<br>CACNA1C;CACNA1C;CACNA1C;<br>CACNA1C;CACNA1C;CACNA1C;<br>CACNA1C;CACNA1C;CACNA1C;<br>CACNA1C;CACNA1C | 0.10611               | 0.03959           | 0.1881          | -5.31627              | M down vs W                         | 2.61491         | 23.9248          | 68.6205    | 1        |
| cg23159970  | ACNA1C;CACNA1C                                                                                                                             | 0.1066                | 0.04056           | 3.21315         | 3.21315               | M up vs W                           | 2.60872         | 11.7818          | 33.8723    | 1        |
| cg16712155  | OR52L1<br>CXorf41;NUP62CL;CXorf41;CXorf41;CXorf41                                                                                          | 0.1067                | 0.04334           | 3.23525         | 3.23525               | M up vs W                           | 2.60738         | 12.2913          | 35.3553    | 1        |
| cg06350796  | f41;CXorf41                                                                                                                                | 0.10674               | 0.03741           | 0.30119         | -3.32014              | M down vs W                         | 2.60689         | 11.9895          | 34.4938    | 1        |
| cg13683218  | COL24A1                                                                                                                                    | 0.10677               | 0.04429           | 0.02994         | -33.401               | M down vs W                         | 3.32362         | 52.9451          | 47.7898    | 1        |
| cg21104965  | DCBLD1                                                                                                                                     | 0.1068                | 0.03978           | 0.17959         | -5.56823              | M down vs W                         | 2.60619         | 25.2411          | 72.638     | 1        |
| cg10773587  | GFPT1                                                                                                                                      | 0.10702               | 0.04688           | 0.23533         | -4.24938              | M down vs W                         | 2.89414         | 11.9012          | 18.5047    | 1        |
| cg02187214  | FOXC2                                                                                                                                      | 0.10726               | 0.04536           | 0.29732         | -3.36338              | M down vs W                         | 2.60036         | 13.3696          | 38.5608    | 1        |
| cg00540295  | FAM69B                                                                                                                                     | 0.1073                | 0.03764           | 3.52975         | 3.52975               | M up vs W                           | 2.59991         | 13.2452          | 38.2087    | 1        |
| cg01405040  | HOXD12                                                                                                                                     | 0.10736               | 0.039             | 0.30416         | -3.28771              | M down vs W                         | 2.59915         | 11.9843          | 34.5814    | 1        |
| cg00611789  | CMYA5                                                                                                                                      | 0.10742               | 0.0388            | 0.16124         | -6.20198              | M down vs W                         | 2.59833         | 28.1003          | 81.1106    | 1        |
| cg19080354  | ATHL1                                                                                                                                      | 0.1075                | 0.03802           | 3.6106          | 3.6106                | M up vs W                           | 2.59736         | 13.7754          | 39.777     | 1        |



| Probeset ID | UCSC_REFGENE_NAME                                  | p-value (H3.3 Status) | p-value (M vs. W) | Ratio (M vs. W) | Fold-Change (M vs. W) | Fold-Change (M vs. W) (Description) | F (H3.3 Status) | SS (H3.3 Status) | SS (Error) | F(Error) |
|-------------|----------------------------------------------------|-----------------------|-------------------|-----------------|-----------------------|-------------------------------------|-----------------|------------------|------------|----------|
| cg01552920  | MYADML2<br>LDHA;LDHA;LDHA;LDHA;LDHA;L              | 0.10773               | 0.04779           | 0.33151         | -3.01655              | M down vs W                         | 2.59452         | 11.3374          | 32.7732    | 1        |
| cg02132760  | DHA                                                | 0.10786               | 0.04874           | 3.34307         | 3.34307               | M up vs W                           | 2.59288         | 13.6684          | 39.5364    | 1        |
| cg16723800  | TAF7L;TAF7L                                        | 0.10821               | 0.0381            | 0.25845         | -3.8692               | M down vs W                         | 2.58843         | 15.2615          | 44.2204    | 1        |
| cg04187185  | CCL28                                              | 0.10856               | 0.04082           | 0.20824         | -4.80207              | M down vs W                         | 2.58415         | 21.1511          | 61.3871    | 1        |
| cg11189272  | OR4D1                                              | 0.10857               | 0.03849           | 5.2483          | 5.2483                | M up vs W                           | 2.58402         | 22.9798          | 66.698     | 1        |
| cg16587616  | KHDRBS2;KHDRBS2                                    | 0.10873               | 0.04344           | 0.28257         | -3.53893              | M down vs W                         | 2.58207         | 14.1182          | 41.0084    | 1        |
| cg23485564  | ASB12                                              | 0.10888               | 0.03858           | 3.24474         | 3.24474               | M up vs W                           | 2.58015         | 11.5782          | 33.6558    | 1        |
| cg05471616  | TMTC1                                              | 0.10914               | 0.03878           | 0.28405         | -3.52048              | M down vs W                         | 2.57693         | 13.2525          | 38.5707    | 1        |
| cg00230700  | AGPAT9                                             | 0.10931               | 0.0387            | 0.25149         | -3.97629              | M down vs W                         | 2.57489         | 15.9128          | 46.35      | 1        |
| cg01016119  | ARHGEF3;ARHGEF3                                    | 0.10964               | 0.03876           | 3.02538         | 3.02538               | M up vs W                           | 2.57078         | 10.2262          | 29.834     | 1        |
| cg09140090  | JMJD5;JMJD5                                        | 0.10974               | 0.04178           | 4.75175         | 4.75175               | M up vs W                           | 2.7194          | 15.1148          | 30.5698    | 1        |
| cg26388509  | CNPY1                                              | 0.1103                | 0.04099           | 3.68109         | 3.68109               | M up vs W                           | 2.5628          | 14.4975          | 42.4268    | 1        |
| cg07166679  | TNFRSF8                                            | 0.1104                | 0.04018           | 0.232           | -4.31032              | M down vs W                         | 2.5616          | 18.0461          | 52.8364    | 1        |
| cg26608305  | AP2A2                                              | 0.11048               | 0.04284           | 3.031           | 3.031                 | M up vs W                           | 2.56065         | 10.7084          | 31.3643    | 1        |
| cg04912843  | GIPC2                                              | 0.1107                | 0.04105           | 0.19323         | -5.17513              | M down vs W                         | 2.55796         | 23.0403          | 67.5549    | 1        |
| cg06942159  | TNK1                                               | 0.111                 | 0.03935           | 4.14363         | 4.14363               | M up vs W                           | 2.58259         | 16.8276          | 45.6105    | 1        |
| cg11373049  | NDUFC1                                             | 0.11102               | 0.04449           | 3.2306          | 3.2306                | M up vs W                           | 2.92964         | 6.57451          | 8.97653    | 1        |
| cg25241559  | SNED1                                              | 0.11103               | 0.03936           | 0.26539         | -3.76805              | M down vs W                         | 2.58219         | 13.6765          | 37.0752    | 1        |
| cg15197065  | CMYA5                                              | 0.11137               | 0.04009           | 0.18825         | -5.31209              | M down vs W                         | 2.54984         | 23.4436          | 68.9559    | 1        |
| cg21289015  | USH1C;USH1C                                        | 0.11147               | 0.04179           | 0.23994         | -4.16774              | M down vs W                         | 2.54865         | 17.4537          | 51.3617    | 1        |
| cg26283921  | COL18A1                                            | 0.11154               | 0.04298           | 0.27276         | -3.66621              | M down vs W                         | 2.54784         | 14.6465          | 43.1146    | 1        |
| cg00072720  | CLDN7                                              | 0.11163               | 0.04033           | 0.24963         | -4.00596              | M down vs W                         | 2.54667         | 16.2141          | 47.7507    | 1        |
| cg12118269  | TLX1                                               | 0.11165               | 0.04844           | 0.23054         | -4.33762              | M down vs W                         | 2.54646         | 19.782           | 58.2634    | 1        |
| cg10993865  | CARS2                                              | 0.11192               | 0.0395            | 3.52303         | 3.52303               | M up vs W                           | 2.54326         | 13.206           | 38.9441    | 1        |
| cg24691942  | SCMH1                                              | 0.11214               | 0.03975           | 0.18889         | -5.29419              | M down vs W                         | 2.54059         | 23.1727          | 68.4075    | 1        |
| cg07153966  | HOXA3;HOXA3;HOXA3                                  | 0.11216               | 0.03961           | 0.1929          | -5.18399              | M down vs W                         | 2.54032         | 22.553           | 66.5852    | 1        |
| cg02916102  | CYP11A1;CYP11A1;CYP11A1                            | 0.11261               | 0.04078           | 0.25849         | -3.86859              | M down vs W                         | 2.53504         | 15.4181          | 45.6148    | 1        |
| cg20434152  | CAMTA1                                             | 0.11261               | 0.03981           | 4.28807         | 4.28807               | M up vs W                           | 2.53503         | 17.6553          | 52.2341    | 1        |
| cg14009473  | JARID2                                             | 0.11308               | 0.04019           | 3.4198          | 3.4198                | M up vs W                           | 2.52949         | 12.6219          | 37.4244    | 1        |
| cg26690075  | WNT16;WNT16                                        | 0.11344               | 0.04079           | 0.33236         | -3.00883              | M down vs W                         | 2.52514         | 10.1826          | 30.2436    | 1        |
| cg13190306  | LDHA;LDHA;LDHA;LDHA;LDHA                           | 0.11349               | 0.04611           | 4.25254         | 4.25254               | M up vs W                           | 2.52457         | 18.6323          | 55.3531    | 1        |
| cg26422465  | WDR8                                               | 0.11383               | 0.04033           | 4.16351         | 4.16351               | M up vs W                           | 2.52058         | 16.9523          | 50.4417    | 1        |
| cg13818127  | SDK1;SDK1                                          | 0.11404               | 0.0404            | 4.92246         | 4.92246               | M up vs W                           | 2.51812         | 21.1648          | 63.0375    | 1        |
| cg20679271  | MYO7B                                              | 0.11413               | 0.04471           | 6.64211         | 6.64211               | M up vs W                           | 2.51705         | 31.3197          | 93.3225    | 1        |
| cg06332859  | CXCR4<br>ZMYM3;ZMYM3;ZMYM3;BCYRN                   | 0.11424               | 0.04525           | 4.01282         | 4.01282               | M up vs W                           | 2.51582         | 16.955           | 50.5453    | 1        |
| cg10297211  | 1;ZMYM3;ZMYM3                                      | 0.11461               | 0.04373           | 6.2373          | 6.2373                | M up vs W                           | 2.57087         | 25.163           | 63.6201    | 1        |
| cg25599473  | SMOC2;SMOC2                                        | 0.11481               | 0.04267           | 3.27767         | 3.27767               | M up vs W                           | 2.50913         | 12.0027          | 35.877     | 1        |
| cg22459517  | EPS8L1<br>CAMTA2;CAMTA2;CAMTA2;CA                  | 0.11505               | 0.04915           | 0.2885          | -3.46619              | M down vs W                         | 2.50637         | 14.075           | 42.1175    | 1        |
| cg01912298  | MTA2;SPAG7                                         | 0.11525               | 0.04417           | 3.2454          | 3.2454                | M up vs W                           | 2.50409         | 11.9742          | 35.864     | 1        |
| cg10374084  | C19orf41                                           | 0.11539               | 0.04341           | 0.28722         | -3.48168              | M down vs W                         | 2.50239         | 13.3267          | 39.9418    | 1        |
| cg04350913  | FGF12;FGF12;FGF12                                  | 0.11565               | 0.04157           | 0.22718         | -4.40172              | M down vs W                         | 2.49946         | 18.4065          | 55.2314    | 1        |
| cg26983430  | RBMY1J;RBMY1J;RBMY1F<br>APBB3;APBB3;SLC35A4;APBB3; | 0.11595               | 0.04482           | 0.21453         | -4.66136              | M down vs W                         | 2.55465         | 17.5296          | 44.602     | 1        |
| cg17400634  | APBB3                                              | 0.11603               | 0.04712           | 0.32233         | -3.10238              | M down vs W                         | 2.55366         | 9.7157           | 24.73      | 1        |
| cg17800708  | HOXA3;HOXA3;HOXA3                                  | 0.11609               | 0.04981           | 0.28459         | -3.51385              | M down vs W                         | 2.49439         | 14.4113          | 43.331     | 1        |
| cg02767613  | ACTA1                                              | 0.11655               | 0.04159           | 0.29974         | -3.33625              | M down vs W                         | 2.48906         | 12.1174          | 36.5118    | 1        |
| cg09033577  | THNSL2                                             | 0.11669               | 0.0423            | 3.09441         | 3.09441               | M up vs W                           | 2.48753         | 10.7298          | 32.3507    | 1        |
| cg01899600  | OR56B1                                             | 0.11672               | 0.04631           | 3.05982         | 3.05982               | M up vs W                           | 2.48714         | 10.9803          | 33.1112    | 1        |
| cg00374596  | PPP1CA;PPP1CA;PPP1CA                               | 0.11687               | 0.04433           | 5.17732         | 5.17732               | M up vs W                           | 2.75093         | 14.187           | 23.2072    | 1        |
| cg20916523  | VHL;VHL                                            | 0.11692               | 0.04534           | 3.13597         | 3.13597               | M up vs W                           | 2.48493         | 11.3416          | 34.231     | 1        |
| cg18544085  | SNORA9;C7orf40<br>SNORD115-15;SNORD115-            | 0.117                 | 0.04325           | 0.18068         | -5.53475              | M down vs W                         | 2.51076         | 23.1298          | 64.486     | 1        |
| cg06127174  | 21;SNORD115-32                                     | 0.11711               | 0.046             | 4.08673         | 4.08673               | M up vs W                           | 2.48277         | 17.3115          | 52.2951    | 1        |
| cg23489273  | HLA-A                                              | 0.11712               | 0.04502           | 0.19619         | -5.09722              | M down vs W                         | 2.4826          | 22.9311          | 69.2756    | 1        |
| cg04163147  | OR52B4;OR52B4                                      | 0.1172                | 0.04334           | 3.07147         | 3.07147               | M up vs W                           | 2.48165         | 10.6863          | 32.2961    | 1        |
| cg05000748  | RUNX1                                              | 0.11728               | 0.04165           | 0.25789         | -3.8777               | M down vs W                         | 2.48079         | 15.2913          | 46.229     | 1        |
| cg00591844  | CXCR4                                              | 0.11732               | 0.0491            | 4.48701         | 4.48701               | M up vs W                           | 2.48038         | 20.3044          | 61.3951    | 1        |

| Probeset ID | UCSC_REFGENE_NAME            | p-value (H3.3 Status) | p-value (M vs. W) | Ratio (M vs. W) | Fold-Change (M vs. W) | Fold-Change (M vs. W) (Description) | F (H3.3 Status) | SS (H3.3 Status) | SS (Error) | F(Error) |
|-------------|------------------------------|-----------------------|-------------------|-----------------|-----------------------|-------------------------------------|-----------------|------------------|------------|----------|
| cg09408768  | KCNJ3                        | 0.11774               | 0.04193           | 0.23747         | -4.21116              | M down vs W                         | 2.47558         | 17.2271          | 52.1913    | 1        |
| cg15944684  | HRNBP3                       | 0.11776               | 0.04378           | 0.22084         | -4.52827              | M down vs W                         | 2.47541         | 19.4009          | 58.781     | 1        |
| cg02445447  | FHL2;FHL2;FHL2;FHL2;FHL2     | 0.11784               | 0.04222           | 0.31936         | -3.13124              | M down vs W                         | 2.47444         | 10.8887          | 33.0037    | 1        |
| cg23236404  | STMN1;STMN1;STMN1;STMN1      | 0.11805               | 0.04685           | 5.9153          | 5.9153                | M up vs W                           | 3.11554         | 13.1665          | 12.6782    | 1        |
| cg08404028  | CHP2;CHP2                    | 0.11815               | 0.04214           | 0.23307         | -4.29054              | M down vs W                         | 2.47096         | 17.687           | 53.6844    | 1        |
| cg11229513  | PRDM14                       | 0.11848               | 0.04502           | 0.32957         | -3.03426              | M down vs W                         | 2.46728         | 10.5845          | 32.1746    | 1        |
| cg09803262  | DLX6AS                       | 0.11861               | 0.04487           | 0.26706         | -3.74455              | M down vs W                         | 2.46585         | 14.9442          | 45.4534    | 1        |
| cg04154027  | CMYA5                        | 0.11922               | 0.04247           | 0.13698         | -7.30051              | M down vs W                         | 2.45896         | 32.9107          | 100.38     | 1        |
| cg21208996  | C14orf129                    | 0.11976               | 0.0461            | 3.1174          | 3.1174                | M up vs W                           | 2.45294         | 11.1686          | 34.1486    | 1        |
| cg16768018  | ZIC4;ZIC4;ZIC4;ZIC4;ZIC4     | 0.11983               | 0.04923           | 4.98518         | 4.98518               | M up vs W                           | 2.45215         | 23.0169          | 70.398     | 1        |
| cg17181941  | NCAPH                        | 0.1201                | 0.04292           | 3.9299          | 3.9299                | M up vs W                           | 2.44924         | 15.6154          | 47.8172    | 1        |
| cg08408994  | ALX4                         | 0.12063               | 0.04591           | 0.28223         | -3.54316              | M down vs W                         | 2.44344         | 13.7445          | 42.1879    | 1        |
| cg02613380  | UBTD1                        | 0.12072               | 0.04309           | 3.18236         | 3.18236               | M up vs W                           | 2.44234         | 11.1612          | 34.2741    | 1        |
| cg04633600  | SLCO4C1                      | 0.12103               | 0.0439            | 0.30682         | -3.25923              | M down vs W                         | 2.43904         | 11.7138          | 36.0197    | 1        |
| cg20952286  | CCDC37                       | 0.12114               | 0.04924           | 0.30104         | -3.32183              | M down vs W                         | 2.43777         | 12.7792          | 39.3163    | 1        |
| cg22979083  | GPR20                        | 0.12126               | 0.0438            | 3.18614         | 3.18614               | M up vs W                           | 2.43643         | 11.2434          | 34.6104    | 1        |
| cg15412815  | C11orf75                     | 0.12133               | 0.04556           | 3.39303         | 3.39303               | M up vs W                           | 2.43569         | 12.7323          | 39.2054    | 1        |
| cg11177179  | CHURC1;CHURC1                | 0.12142               | 0.04827           | 0.26071         | -3.83566              | M down vs W                         | 2.56962         | 12.6599          | 27.0972    | 1        |
| cg22306928  | MIR375                       | 0.12149               | 0.04338           | 0.28336         | -3.52912              | M down vs W                         | 2.43395         | 13.2415          | 40.8025    | 1        |
| cg18639578  | IL22RA2;IL22RA2;IL22RA2      | 0.12157               | 0.04506           | 3.4147          | 3.4147                | M up vs W                           | 2.43314         | 12.7835          | 39.4044    | 1        |
| cg07973162  | UGT2B15;UGT2B17              | 0.12178               | 0.0483            | 0.19884         | -5.02911              | M down vs W                         | 2.45644         | 21.2811          | 60.6438    | 1        |
| cg26248155  | CLDN7                        | 0.12199               | 0.04382           | 0.25373         | -3.94127              | M down vs W                         | 2.45412         | 14.6174          | 41.6938    | 1        |
| cg08514194  | KRTAP12-4;C21orf29           | 0.122                 | 0.0467            | 0.18215         | -5.48991              | M down vs W                         | 2.45403         | 23.2424          | 66.2976    | 1        |
| cg04646986  | MOBK1A                       | 0.12248               | 0.04574           | 0.27596         | -3.62376              | M down vs W                         | 2.42323         | 14.0952          | 43.6251    | 1        |
| cg21207958  | SOX3                         | 0.12274               | 0.04505           | 4.60302         | 4.60302               | M up vs W                           | 2.5111          | 14.983           | 35.8003    | 1        |
| cg04511125  | THNSL2                       | 0.12277               | 0.04456           | 0.30958         | -3.23021              | M down vs W                         | 2.42014         | 11.5294          | 35.7296    | 1        |
| cg14380609  | HSPG2                        | 0.1228                | 0.04622           | 0.32735         | -3.05483              | M down vs W                         | 2.67152         | 7.08686          | 11.9374    | 1        |
| cg09273054  | MAL2                         | 0.12297               | 0.04563           | 0.27631         | -3.61917              | M down vs W                         | 2.41794         | 14.0199          | 43.487     | 1        |
| cg12060472  | ECHDC2;ECHDC2                | 0.12344               | 0.04927           | 0.30534         | -3.275                | M down vs W                         | 2.41289         | 12.3551          | 38.4035    | 1        |
| cg15690475  | MAPT;MAPT;MAPT;MAPT;MAPT     | 0.12359               | 0.04544           | 4.29388         | 4.29388               | M up vs W                           | 2.41127         | 17.9094          | 55.7052    | 1        |
| cg13913990  | PLEKHG4B                     | 0.1236                | 0.0472            | 3.17567         | 3.17567               | M up vs W                           | 2.4112          | 11.4699          | 35.6769    | 1        |
| cg07584620  | MORN1                        | 0.12386               | 0.04473           | 5.20334         | 5.20334               | M up vs W                           | 2.40843         | 22.7415          | 70.8185    | 1        |
| cg01664864  | DIO3;MIR1247                 | 0.12402               | 0.0483            | 0.1932          | -5.17605              | M down vs W                         | 2.4067          | 23.4376          | 73.0386    | 1        |
| cg06003986  | BRUNOL4                      | 0.12411               | 0.04493           | 0.29346         | -3.40765              | M down vs W                         | 2.40579         | 12.5807          | 39.2202    | 1        |
| cg00157477  | HLA-H                        | 0.12423               | 0.04542           | 0.21004         | -4.76094              | M down vs W                         | 2.40447         | 20.4742          | 63.8628    | 1        |
| cg18892517  | DPP4                         | 0.12444               | 0.04637           | 0.20632         | -4.84685              | M down vs W                         | 2.40222         | 21.1375          | 65.9936    | 1        |
| cg07234199  | LOC388796;LOC388796;SNORA71C | 0.12513               | 0.04502           | 3.72087         | 3.72087               | M up vs W                           | 2.39498         | 14.3983          | 45.0891    | 1        |
| cg00167275  | FAM35A;GLUD1;GLUD1           | 0.12514               | 0.046             | 0.27551         | -3.62962              | M down vs W                         | 2.41978         | 13.9674          | 40.4053    | 1        |
| cg26018738  | EID2B                        | 0.12517               | 0.04636           | 3.62861         | 3.62861               | M up vs W                           | 2.44869         | 12.2265          | 32.4549    | 1        |
| cg08279075  | IRX3                         | 0.12591               | 0.04546           | 0.19595         | -5.10323              | M down vs W                         | 2.41155         | 22.1235          | 64.2178    | 1        |
| cg22879408  | ELMOD1;ELMOD1                | 0.12594               | 0.04997           | 0.32181         | -3.10743              | M down vs W                         | 2.38646         | 11.2404          | 35.3254    | 1        |
| cg19628148  | CCDC37                       | 0.12597               | 0.04679           | 0.19843         | -5.03969              | M down vs W                         | 2.38612         | 22.1437          | 69.6015    | 1        |
| cg00197495  | PPP1R3C;PPP1R3C              | 0.12604               | 0.04605           | 0.30722         | -3.25501              | M down vs W                         | 2.41016         | 10.8884          | 31.6241    | 1        |
| cg17231690  | KRT19                        | 0.12605               | 0.04572           | 0.17239         | -5.80086              | M down vs W                         | 2.38529         | 25.8604          | 81.312     | 1        |
| cg02194223  | EVX1                         | 0.12651               | 0.04616           | 0.269           | -3.71742              | M down vs W                         | 2.38045         | 14.4641          | 45.5714    | 1        |
| cg00824141  | FHL2;FHL2;FHL2;FHL2;FHL2     | 0.12659               | 0.04547           | 0.12364         | -8.08791              | M down vs W                         | 2.37969         | 36.3837          | 114.67     | 1        |
| cg00735923  | CFTR                         | 0.12667               | 0.04993           | 0.17917         | -5.58118              | M down vs W                         | 2.37877         | 25.7561          | 81.2062    | 1        |
| cg00524708  | PRSS36                       | 0.12689               | 0.0458            | 0.2937          | -3.4048               | M down vs W                         | 2.37656         | 12.5251          | 39.5269    | 1        |
| cg06458732  | SELI;GPR113                  | 0.12701               | 0.0481            | 3.44791         | 3.44791               | M up vs W                           | 2.55446         | 8.57425          | 16.7829    | 1        |
| cg01901262  | IRX5                         | 0.12727               | 0.04625           | 0.27445         | -3.6437               | M down vs W                         | 2.37259         | 13.9925          | 44.2316    | 1        |
| cg12850078  | LOC254559                    | 0.1286                | 0.04665           | 0.18022         | -5.5489               | M down vs W                         | 2.38322         | 22.8428          | 67.0938    | 1        |
| cg11462865  | KRT19                        | 0.1286                | 0.0496            | 0.24627         | -4.06055              | M down vs W                         | 2.35895         | 16.9105          | 53.7647    | 1        |
| cg23279355  | CMYA5                        | 0.12907               | 0.04704           | 0.15138         | -6.60608              | M down vs W                         | 2.35409         | 29.8473          | 95.0918    | 1        |
| cg08021299  | HEPH;HEPH;HEPH               | 0.12954               | 0.04864           | 3.87211         | 3.87211               | M up vs W                           | 2.34931         | 15.568           | 49.6995    | 1        |
| cg03578473  | NEUROD1                      | 0.1297                | 0.04681           | 0.29272         | -3.4163               | M down vs W                         | 2.34773         | 12.5741          | 40.1689    | 1        |
