# Supplementary material
Source: PubMed Central journal article supplement (PMC4028366)
Supplement: NIHMS545812-supplement-401_2013_1218_MOESM32_ESM.pdf [file NIHMS545812-supplement-401_2013_1218_MOESM32_ESM.pdf]

| Probeset ID | UCSC_REFGENE_NAME                                     | p-value(H3.3 Status) | p-value(M vs. W) | Ratio(M vs. W) | Fold-Change(M vs. W) | Fold-Change(M vs. W) (Description) | F(H3.3 Status) | SS(H3.3 Status) | SS(Error) | F(Error) |
|-------------|-------------------------------------------------------|----------------------|------------------|----------------|----------------------|------------------------------------|----------------|-----------------|-----------|----------|
| cg04707703  | TRIP12                                                | 5.02E-07             | 5.02E-07         | 0.212235       | -4.71177             | M down vs W                        | 506.998        | 6.66786         | 0.0789099 | 1        |
| cg25601501  | CCNY;CCNY                                             | 6.01E-07             | 6.01E-07         | 0.209679       | -4.76919             | M down vs W                        | 477.18         | 6.77248         | 0.0851563 | 1        |
| cg18996776  | KPNA4                                                 | 5.53E-07             | 5.53E-07         | 0.158411       | -6.31271             | M down vs W                        | 490.835        | 9.42178         | 0.115173  | 1        |
| cg14718568  | F2R                                                   | 4.42E-07             | 4.42E-07         | 0.193908       | -5.15708             | M down vs W                        | 529.2          | 7.46744         | 0.0846649 | 1        |
| cg27110132  | BTBD12                                                | 4.82E-07             | 4.82E-07         | 5.83604        | 5.83604              | M up vs W                          | 514.173        | 8.63597         | 0.100775  | 1        |
| cg17736819  | EYA4;EYA4;EYA4                                        | 4.89E-07             | 4.89E-07         | 0.183761       | -5.44186             | M down vs W                        | 511.467        | 7.96484         | 0.0934353 | 1        |
| cg06236140  | SNX8                                                  | 3.20E-07             | 3.20E-07         | 0.165092       | -6.05723             | M down vs W                        | 590.307        | 9.00403         | 0.0915188 | 1        |
| cg20543092  | CSRN1                                                 | 5.77E-07             | 5.77E-07         | 5.19998        | 5.19998              | M up vs W                          | 483.859        | 7.54305         | 0.0935362 | 1        |
| cg05617973  | FTL                                                   | 4.06E-07             | 4.06E-07         | 8.38749        | 8.38749              | M up vs W                          | 544.823        | 12.5521         | 0.138233  | 1        |
| cg20884098  | TTC31;CCDC142;TTC31                                   | 5.88E-07             | 5.88E-07         | 0.158039       | -6.32754             | M down vs W                        | 480.677        | 9.44581         | 0.117906  | 1        |
| cg23337382  | GPR125                                                | 5.61E-07             | 5.61E-07         | 5.08513        | 5.08513              | M up vs W                          | 488.557        | 7.34008         | 0.090144  | 1        |
| cg17862722  | EFNB3                                                 | 4.81E-07             | 4.81E-07         | 5.7352         | 5.7352               | M up vs W                          | 514.317        | 8.46615         | 0.0987656 | 1        |
| cg15335525  | TPCN2                                                 | 7.61E-07             | 7.61E-07         | 0.216535       | -4.61818             | M down vs W                        | 440.71         | 6.49638         | 0.0884443 | 1        |
| cg15330178  | C9orf129                                              | 6.88E-07             | 6.88E-07         | 5.04459        | 5.04459              | M up vs W                          | 455.905        | 7.268           | 0.0956516 | 1        |
| cg23304296  | C1orf203;C1orf203;C1orf203;C1orf203;C1orf203          | 6.26E-07             | 6.26E-07         | 4.46695        | 4.46695              | M up vs W                          | 470.816        | 6.21671         | 0.0792247 | 1        |
| cg26188818  | SLC2A1                                                | 7.22E-07             | 7.22E-07         | 5.32263        | 5.32263              | M up vs W                          | 448.717        | 7.75789         | 0.103734  | 1        |
| cg10444556  | IFT140;CRAMP1L                                        | 7.35E-07             | 7.35E-07         | 5.60071        | 5.60071              | M up vs W                          | 445.957        | 8.23767         | 0.110831  | 1        |
| cg17298181  | BCL6                                                  | 6.69E-07             | 6.69E-07         | 13.9579        | 13.9579              | M up vs W                          | 460.364        | 19.2838         | 0.251329  | 1        |
| cg18764291  | SNX2                                                  | 5.84E-07             | 5.84E-07         | 5.47911        | 5.47911              | M up vs W                          | 481.738        | 8.02911         | 0.100002  | 1        |
| cg03834909  | CIRBP;C19orf23;CIRBP;CIRBP                            | 1.10E-06             | 1.10E-06         | 5.13405        | 5.13405              | M up vs W                          | 388.686        | 7.42675         | 0.114644  | 1        |
| cg01895439  | ANKRD9                                                | 9.30E-07             | 9.30E-07         | 0.178753       | -5.59431             | M down vs W                        | 411.82         | 8.22674         | 0.119859  | 1        |
| cg21879272  | SAV1                                                  | 2.03E-06             | 2.03E-06         | 0.154211       | -6.4846              | M down vs W                        | 316.524        | 6.98855         | 0.183845  | 1        |
| cg03418237  | DIP2C                                                 | 6.70E-07             | 6.70E-07         | 0.170187       | -5.87588             | M down vs W                        | 460.139        | 8.7027          | 0.113479  | 1        |
| cg24346637  | UBL4B                                                 | 6.29E-07             | 6.29E-07         | 5.00636        | 5.00636              | M up vs W                          | 470.08         | 7.19982         | 0.091897  | 1        |
| cg03166550  | PSMB8;PSMB8;PSMB8                                     | 5.97E-07             | 5.97E-07         | 5.92175        | 5.92175              | M up vs W                          | 478.349        | 8.7793          | 0.11012   | 1        |
| cg06338150  | NOTCH1                                                | 8.73E-07             | 8.73E-07         | 0.209082       | -4.78282             | M down vs W                        | 420.844        | 6.79725         | 0.0969088 | 1        |
| cg02281489  | TWIST2                                                | 7.00E-07             | 7.00E-07         | 0.156657       | -6.38339             | M down vs W                        | 453.236        | 9.536           | 0.126239  | 1        |
| cg09226684  | KLK10;KLK10;KLK10                                     | 8.89E-07             | 8.89E-07         | 5.11636        | 5.11636              | M up vs W                          | 418.218        | 7.39544         | 0.106099  | 1        |
| cg13909342  | TJP2                                                  | 8.14E-07             | 8.14E-07         | 0.202639       | -4.93488             | M down vs W                        | 430.868        | 7.07183         | 0.0984779 | 1        |
| cg06973760  | NFATC1;NFATC1;NFATC1                                  | 1.67E-06             | 1.67E-06         | 6.58464        | 6.58464              | M up vs W                          | 337.858        | 9.85803         | 0.175068  | 1        |
| cg22385817  | TRAPPC1;TRAPPC1;CNTROB;TRAPPC1;CNTROB;TRAPPC1;TRAPPC1 | 1.12E-06             | 1.12E-06         | 1.87E+17       | 1.87E+17             | M up vs W                          | 2309.06        | 2469.23         | 4.27747   | 1        |
| cg08404560  | SGOL2;SGOL2;SGOL2;SGOL2;SGOL2                         | 1.16E-06             | 1.16E-06         | 0.193629       | -5.16451             | M down vs W                        | 382.061        | 7.48055         | 0.117477  | 1        |
| cg03476862  | TRRAP                                                 | 1.49E-06             | 1.49E-06         | 0.193946       | -5.15608             | M down vs W                        | 350.988        | 7.46568         | 0.127623  | 1        |
| cg02646611  | RBAK                                                  | 1.32E-06             | 1.32E-06         | 0.202698       | -4.93346             | M down vs W                        | 365.556        | 7.06929         | 0.116031  | 1        |
| cg17919570  | HJURP                                                 | 6.54E-07             | 6.54E-07         | 5.33648        | 5.33648              | M up vs W                          | 463.869        | 7.78201         | 0.100658  | 1        |
| cg16349656  | KCNH2;KCNH2                                           | 1.46E-06             | 1.46E-06         | 8.41905        | 8.41905              | M up vs W                          | 353.449        | 12.5965         | 0.213833  | 1        |
| cg12648600  | MRPS18B;PPP1R10                                       | 1.18E-06             | 1.18E-06         | 4.59058        | 4.59058              | M up vs W                          | 380.054        | 6.44557         | 0.101758  | 1        |
| cg23848568  | SLC38A9                                               | 1.40E-06             | 1.40E-06         | 0.196141       | -5.09837             | M down vs W                        | 358.858        | 7.36356         | 0.123117  | 1        |
| cg22580173  | THBS1;THBS1                                           | 2.06E-06             | 2.06E-06         | 7.31527        | 7.31527              | M up vs W                          | 314.612        | 10.9895         | 0.209582  | 1        |
| cg10516204  | PAN2;PAN2;CNPY2;PAN2                                  | 1.30E-06             | 1.30E-06         | 4.95785        | 4.95785              | M up vs W                          | 367.368        | 7.11304         | 0.116173  | 1        |
| cg24115818  | RPL27                                                 | 1.23E-06             | 1.23E-06         | 8.55136        | 8.55136              | M up vs W                          | 374.538        | 12.7816         | 0.204757  | 1        |
| cg20207890  | FHL3                                                  | 2.73E-06             | 2.73E-06         | 5.29859        | 5.29859              | M up vs W                          | 286.18         | 7.71594         | 0.161771  | 1        |
| cg19252565  | KIF25;KIF25                                           | 3.50E-06             | 3.50E-06         | 4.40903        | 4.40903              | M up vs W                          | 262.899        | 6.10877         | 0.139417  | 1        |
| cg24208771  | DPM1;MOCS3                                            | 1.48E-06             | 1.48E-06         | 0.199675       | -5.00813             | M down vs W                        | 351.938        | 7.20299         | 0.1228    | 1        |
| cg12463089  | PABPC1P2                                              | 2.10E-06             | 2.10E-06         | 4.76416        | 4.76416              | M up vs W                          | 312.942        | 6.76334         | 0.129673  | 1        |
| cg04349117  | SGK269                                                | 1.46E-06             | 1.46E-06         | 4.95351        | 4.95351              | M up vs W                          | 353.534        | 7.10526         | 0.120587  | 1        |
| cg24530508  | AIP1;AIP1;AIP1                                        | 2.06E-06             | 2.06E-06         | 0.18508        | -5.40307             | M down vs W                        | 314.882        | 7.89771         | 0.150489  | 1        |
| cg25322489  | PTPRN2;PTPRN2;PTPRN2                                  | 1.51E-06             | 1.51E-06         | 0.192503       | -5.19473             | M down vs W                        | 349.974        | 7.53381         | 0.129161  | 1        |
| cg23475112  | SLC22A5                                               | 4.91E-06             | 4.91E-06         | 6.00152        | 6.00152              | M up vs W                          | 234.282        | 8.91189         | 0.228235  | 1        |
| cg10688941  | SNRNP200;SNRNP200                                     | 2.13E-06             | 2.13E-06         | 5.51647        | 5.51647              | M up vs W                          | 311.261        | 8.09339         | 0.156012  | 1        |
| cg07392137  | RNF2                                                  | 6.46E-06             | 6.46E-06         | 6.75632        | 6.75632              | M up vs W                          | 213.372        | 10.1291         | 0.284831  | 1        |
| cg14917378  | ITPK1;ITPK1                                           | 1.05E-06             | 1.05E-06         | 0.207244       | -4.82522             | M down vs W                        | 394.913        | 6.87413         | 0.10444   | 1        |
| cg27404824  | ADARB2                                                | 2.97E-06             | 2.97E-06         | 7.9135         | 7.9135               | M up vs W                          | 277.937        | 11.8749         | 0.25635   | 1        |
| cg13547574  | STEAP2;STEAP2                                         | 1.44E-06             | 1.44E-06         | 0.188526       | -5.3043              | M down vs W                        | 355.606        | 7.72591         | 0.130356  | 1        |
| cg11813246  | RIMKLA                                                | 1.14E-06             | 1.14E-06         | 5.42582        | 5.42582              | M up vs W                          | 384.801        | 7.9371          | 0.123759  | 1        |
| cg00579960  | SFRS15;SFRS15;SFRS15                                  | 1.44E-06             | 1.44E-06         | 12.3933        | 12.3933              | M up vs W                          | 355.535        | 17.5836         | 0.29674   | 1        |
| cg07085476  | PCF11                                                 | 2.26E-06             | 2.26E-06         | 5.34315        | 5.34315              | M up vs W                          | 304.846        | 7.79364         | 0.153395  | 1        |
| cg11817038  | ATP10A                                                | 2.68E-06             | 2.68E-06         | 0.186106       | -5.37328             | M down vs W                        | 288.026        | 7.84603         | 0.163444  | 1        |
| cg01130144  | HIST1H2BN;HIST1H2AK                                   | 2.01E-06             | 2.01E-06         | 0.185525       | -5.39011             | M down vs W                        | 317.295        | 8.78754         | 0.148919  | 1        |
| cg04668677  | PKD1;PKD1                                             | 1.30E-06             | 1.30E-06         | 0.169581       | -5.8969              | M down vs W                        | 367.63         | 8.73784         | 0.142608  | 1        |
| cg00991794  | STL                                                   | 1.55E-06             | 1.55E-06         | 6.56765        | 6.56765              | M up vs W                          | 346.259        | 8.33469         | 0.144424  | 1        |
| cg12283362  | LONP1                                                 | 2.50E-06             | 2.50E-06         | 0.174908       | -5.71728             | M down vs W                        | 294.894        | 8.43584         | 0.171638  | 1        |
| cg25698541  | WBP11;C12orf60;WBP11                                  | 2.53E-06             | 2.53E-06         | 10.003         | 10.003               | M up vs W                          | 293.712        | 14.7175         | 0.300652  | 1        |
| cg10454121  | KCNH2;KCNH2                                           | 2.93E-06             | 2.93E-06         | 51.0809        | 51.0809              | M up vs W                          | 279.301        | 42.9365         | 0.922372  | 1        |
| cg08326109  | CGB7                                                  | 1.72E-06             | 1.72E-06         | 5.19885        | 5.19885              | M up vs W                          | 334.692        | 7.54107         | 0.135188  | 1        |
| cg08393006  | SFRS14;ARMC6;SFRS14                                   | 1.95E-06             | 1.95E-06         | 0.154384       | -6.47735             | M down vs W                        | 320.784        | 9.68693         | 0.181186  | 1        |
| cg14910265  | GATM;LOC145663                                        | 1.29E-06             | 1.29E-06         | 0.185918       | -5.37871             | M down vs W                        | 368.316        | 7.85546         | 0.127968  | 1        |
| cg19930417  | SECTM1                                                | 1.53E-06             | 1.53E-06         | 5.69526        | 5.69526              | M up vs W                          | 348.028        | 8.39853         | 0.14479   | 1        |
| cg10193069  | NOSIP                                                 | 1.75E-06             | 1.75E-06         | 0.145165       | -6.88873             | M down vs W                        | 332.669        | 10.336          | 0.186419  | 1        |
| cg03673687  | EML1;EML1;EML1;EML1                                   | 2.00E-06             | 2.00E-06         | 4.81273        | 4.81273              | M up vs W                          | 317.67         | 6.85151         | 0.129408  | 1        |

| Probeset ID    | UCSC_REFGENE_NAME                                | p-value(H3.3 Status) | p-value(M vs. W) | Ratio(M vs. W) | Fold-Change(M vs. W) | Fold-Change(M vs. W) (Description) | F(H3.3 Status) | SS(H3.3 Status) | SS(Error) | F(Error) |
|----------------|--------------------------------------------------|----------------------|------------------|----------------|----------------------|------------------------------------|----------------|-----------------|-----------|----------|
| cg16792978     | GREB1;GREB1;GREB1                                | 1.56E-06             | 1.56E-06         | 5.01714        | 5.01714              | M up vs W                          | 345.564        | 7.21906         | 0.125344  | 1        |
| cg14697743     | SEPT9;SEPT9;SEPT9;SEPT9;SEPT9;SEPT9              | 1.94E-06             | 1.94E-06         | 5.24713        | 5.24713              | M up vs W                          | 321.346        | 7.62587         | 0.142386  | 1        |
| cg16627549     | PUS7L;IRAK4;PUS7L;IRAK4;IRA K4;IRAK4;PUS7L;IRAK4 | 1.99E-06             | 1.99E-06         | 6.87708        | 6.87708              | M up vs W                          | 318.367        | 10.3179         | 0.194452  | 1        |
| cg14797322     | FAM119B;METTL1;METTL1;ME                         | 1.89E-06             | 1.89E-06         | 0.192717       | -5.18895             | M down vs W                        | 323.88         | 7.52363         | 0.139378  | 1        |
| cg21776674     | KCNAB2;KCNAB2                                    | 1.91E-06             | 1.91E-06         | 0.180083       | -5.55298             | M down vs W                        | 322.988        | 8.15604         | 0.151511  | 1        |
| cg03142885     | NRSN1                                            | 3.00E-06             | 3.00E-06         | 0.174868       | -5.71859             | M down vs W                        | 276.994        | 8.43805         | 0.182778  | 1        |
| cg12331743     | NFKB2;NFKB2;NFKB2                                | 1.54E-06             | 1.54E-06         | 0.172443       | -5.79903             | M down vs W                        | 346.979        | 8.57378         | 0.148259  | 1        |
| cg12602291     | COBL                                             | 2.89E-06             | 2.89E-06         | 0.206889       | -4.83351             | M down vs W                        | 280.612        | 6.88914         | 0.147303  | 1        |
| cg12454725     | SYT17                                            | 3.17E-06             | 3.17E-06         | 0.205139       | -4.87475             | M down vs W                        | 271.91         | 6.96363         | 0.153666  | 1        |
| cg18254819     | SPIB;SPIB                                        | 3.20E-06             | 3.20E-06         | 5.05457        | 5.05457              | M up vs W                          | 271.176        | 7.28575         | 0.161204  | 1        |
| cg24014990     | VASH1                                            | 2.81E-06             | 2.81E-06         | 0.13358        | -7.48613             | M down vs W                        | 283.377        | 11.246          | 0.238114  | 1        |
| cg00098951     | TAF4                                             | 5.48E-07             | 5.48E-07         | 5.24858        | 5.24858              | M up vs W                          | 492.435        | 7.62842         | 0.0929474 | 1        |
| cg12641021     | BEND7;BEND7                                      | 4.76E-06             | 4.76E-06         | 0.117487       | -8.51158             | M down vs W                        | 236.871        | 12.7261         | 0.322355  | 1        |
| cg15682717     | PTPN9                                            | 4.11E-06             | 4.11E-06         | 0.178618       | -5.59853             | M down vs W                        | 248.955        | 8.23395         | 0.198444  | 1        |
| cg13838074     | ARF6                                             | 4.88E-06             | 4.88E-06         | 0.178505       | -5.60209             | M down vs W                        | 234.792        | 8.24004         | 0.210571  | 1        |
| cg05482832     | MIR636;SFRS2;MFS11                               | 3.55E-06             | 3.55E-06         | 6.09E-16       | -1.64E+15            | M down vs W                        | 486.981        | 2043.86         | 20.9851   | 1        |
| cg03769349     | KIAA1429;KIAA1429                                | 3.26E-06             | 3.26E-06         | 2.29E-17       | -4.36E+16            | M down vs W                        | 1354.26        | 2444.2          | 7.2193    | 1        |
| cg23358871     | EIF4A3                                           | 2.77E-06             | 2.77E-06         | 6.64824        | 6.64824              | M up vs W                          | 284.616        | 9.95885         | 0.209943  | 1        |
| cg10204999     | RCOR1                                            | 4.36E-06             | 4.36E-06         | 4.45753        | 4.45753              | M up vs W                          | 243.995        | 6.19919         | 0.152442  | 1        |
| cg14272860     | ZNF574;ZNF574                                    | 2.97E-06             | 2.97E-06         | 0.175035       | -5.71314             | M down vs W                        | 278.051        | 8.42883         | 0.181884  | 1        |
| cg19243691     | FAM40B;FAM40B                                    | 2.89E-06             | 2.89E-06         | 0.175825       | -5.68748             | M down vs W                        | 280.509        | 8.38534         | 0.17936   | 1        |
| cg02891579     | KAZALD1                                          | 3.33E-06             | 3.33E-06         | 0.109365       | -9.14368             | M down vs W                        | 267.38         | 13.5917         | 0.304999  | 1        |
| cg09448951     | KIAA0174                                         | 1.34E-06             | 1.34E-06         | 0.148604       | -6.72928             | M down vs W                        | 363.687        | 10.0866         | 0.166407  | 1        |
| cg15750461     | IDUA                                             | 5.62E-06             | 5.62E-06         | 5.43285        | 5.43285              | M up vs W                          | 223.762        | 7.94925         | 0.213153  | 1        |
| cg24136586     | ATG10;ATG10                                      | 2.78E-06             | 2.78E-06         | 9.23323        | 9.23323              | M up vs W                          | 284.478        | 13.7117         | 0.289198  | 1        |
| cg16650530     | TMEM39B                                          | 2.49E-06             | 2.49E-06         | 0.197497       | -5.06337             | M down vs W                        | 295.028        | 7.30142         | 0.148489  | 1        |
| cg24733384     | FAM177A1;FAM177A1                                | 1.18E-05             | 1.18E-05         | 7.33577        | 7.33577              | M up vs W                          | 173.836        | 11.0204         | 0.380374  | 1        |
| cg03337507     | COL13A1;COL13A1;COL13A1;C                        | 2.27E-06             | 2.27E-06         | 5.85902        | 5.85902              | M up vs W                          | 304.352        | 8.67449         | 0.171009  | 1        |
| cg25513531     | SIRT1;SIRT1                                      | 2.52E-06             | 2.52E-06         | 0.144757       | -6.90814             | M down vs W                        | 294.108        | 10.3661         | 0.211476  | 1        |
| cg20136584     | ETNK2                                            | 5.55E-06             | 5.55E-06         | 5.6688         | 5.6688               | M up vs W                          | 224.702        | 8.35364         | 0.223059  | 1        |
| cg02057391     | TRPC4;TRPC4;TRPC4;TRPC4;TR                       | 4.59E-06             | 4.59E-06         | 0.169462       | -5.90101             | M down vs W                        | 239.694        | 8.74471         | 0.218897  | 1        |
| cg17809181     | PTPRN2;PTPRN2;PTPRN2                             | 7.80E-06             | 7.80E-06         | 5.58313        | 5.58313              | M up vs W                          | 200.059        | 8.20764         | 0.246156  | 1        |
| cg00153934     | LCA5;LCA5                                        | 4.82E-06             | 4.82E-06         | 5.02996        | 5.02996              | M up vs W                          | 430.275        | 7.24193         | 0.0841547 | 1        |
| cg21222556     | FAM102A;FAM102A                                  | 5.12E-06             | 5.12E-06         | 0.165298       | -6.04968             | M down vs W                        | 230.929        | 8.99157         | 0.233619  | 1        |
| cg26900458     | MIR1204;PVT1                                     | 6.12E-06             | 6.12E-06         | 5.0251         | 5.0251               | M up vs W                          | 217.362        | 7.23326         | 0.199665  | 1        |
| cg12735498     | PDIA3;CATSPER2P1                                 | 3.73E-06             | 3.73E-06         | 0.14916        | -6.70421             | M down vs W                        | 257.278        | 10.0472         | 0.234311  | 1        |
| cg12818557     | MMP16;MMP16                                      | 6.86E-06             | 6.86E-06         | 5.04346        | 5.04346              | M up vs W                          | 209.012        | 7.26598         | 0.208581  | 1        |
| cg08198713     | KLRC1;KLRC1;KLRC1;KLRC1                          | 7.95E-06             | 7.95E-06         | 0.180969       | -5.5258              | M down vs W                        | 198.761        | 8.10942         | 0.244799  | 1        |
| cg22716190     | PPT1;PPT1                                        | 6.22E-06             | 6.22E-06         | 0.171197       | -5.84121             | M down vs W                        | 216.19         | 8.64463         | 0.239917  | 1        |
| cg14037832     | PVT1                                             | 2.88E-06             | 2.88E-06         | 0.18341        | -5.45225             | M down vs W                        | 280.973        | 7.98278         | 0.170467  | 1        |
| cg01113597     | COL27A1                                          | 6.02E-06             | 6.02E-06         | 5.43913        | 5.43913              | M up vs W                          | 218.579        | 7.96011         | 0.218506  | 1        |
| cg05241015     | PXDN                                             | 4.76E-06             | 4.76E-06         | 6.29077        | 6.29077              | M up vs W                          | 236.82         | 9.38622         | 0.237806  | 1        |
| ch.11.1702122F | GAB2                                             | 6.01E-06             | 6.01E-06         | 2.78E-29       | -3.60E+28            | M down vs W                        | 393.49         | 7199.07         | 91.4773   | 1        |
| cg10318510     | PRKD1                                            | 7.57E-06             | 7.57E-06         | 0.150493       | -6.64483             | M down vs W                        | 202.084        | 9.95345         | 0.295524  | 1        |
| cg02320862     | SEPT9;SEPT9;SEPT9;SEPT9                          | 6.80E-06             | 6.80E-06         | 5.78689        | 5.78689              | M up vs W                          | 209.692        | 8.55335         | 0.24474   | 1        |
| cg13534580     | LRRFIP1;LRRFIP1;LRRFIP1;LRRFI                    | 6.72E-06             | 6.72E-06         | 0.178258       | -5.60984             | M down vs W                        | 210.567        | 8.25326         | 0.235172  | 1        |
| cg02703850     | A1                                               | 4.35E-06             | 4.35E-06         | 0.162591       | -6.15042             | M down vs W                        | 244.198        | 9.15732         | 0.224997  | 1        |
| cg12259986     | OPA3;OPA3                                        | 3.92E-06             | 3.92E-06         | 0.157682       | -6.34186             | M down vs W                        | 252.96         | 9.46897         | 0.224596  | 1        |
| cg21167723     | FUT10                                            | 6.15E-06             | 6.15E-06         | 0.191689       | -5.21677             | M down vs W                        | 216.94         | 7.57259         | 0.209438  | 1        |
| cg10739095     | CLSTN2                                           | 6.16E-06             | 6.16E-06         | 0.143757       | -6.95618             | M down vs W                        | 216.87         | 10.4406         | 0.288854  | 1        |
| cg18450555     | FBRSL1                                           | 7.92E-06             | 7.92E-06         | 7.75E-11       | -1.29E+10            | M down vs W                        | 351.97         | 902.474         | 12.8203   | 1        |
| cg16860267     | MPP1                                             | 4.77E-06             | 4.77E-06         | 6.97848        | 6.97848              | M up vs W                          | 236.647        | 10.4751         | 0.265587  | 1        |
| cg16880597     | LRP6                                             | 6.55E-06             | 6.55E-06         | 8.6666         | 8.6666               | M up vs W                          | 212.403        | 12.9415         | 0.365574  | 1        |
| cg05620288     | HS6T1                                            | 7.32E-06             | 7.32E-06         | 6.36136        | 6.36136              | M up vs W                          | 204.432        | 9.50047         | 0.278836  | 1        |
| cg01940855     | CHST11                                           | 6.18E-06             | 6.18E-06         | 0.199575       | -5.01064             | M down vs W                        | 216.574        | 7.20748         | 0.199677  | 1        |
| cg03299121     | PN01;WDR92                                       | 7.48E-06             | 7.48E-06         | 0.167788       | -5.95989             | M down vs W                        | 202.922        | 8.8428          | 0.261464  | 1        |
| cg24034412     | RPL18;SPHK2                                      | 3.20E-06             | 3.20E-06         | 6.1328         | 6.1328               | M up vs W                          | 270.924        | 9.12841         | 0.202161  | 1        |
| cg22964469     | SORL1                                            | 1.33E-05             | 1.33E-05         | 11.6108        | 11.6108              | M up vs W                          | 166.546        | 16.6843         | 0.60107   | 1        |
| cg20508187     | LRR4B                                            | 4.69E-06             | 4.69E-06         | 0.147534       | -6.77808             | M down vs W                        | 238.076        | 10.1633         | 0.256135  | 1        |
| cg24038454     | INSM2;INSM2                                      | 7.28E-06             | 7.28E-06         | 4.84346        | 4.84346              | M up vs W                          | 204.799        | 6.90712         | 0.202358  | 1        |
| cg11308643     | GRIA4;GRIA4;GRIA4;GRIA4                          | 5.92E-06             | 5.92E-06         | 5.46754        | 5.46754              | M up vs W                          | 219.865        | 8.00916         | 0.218566  | 1        |
| cg22831313     | HDDC2                                            | 9.12E-06             | 9.12E-06         | 0.0520098      | -19.2271             | M down vs W                        | 332.518        | 24.2545         | 0.364709  | 1        |
| cg14443515     | MAFF;MAFF;MAFF;MAFF                              | 1.01E-05             | 1.01E-05         | 8.25677        | 8.25677              | M up vs W                          | 183.383        | 12.3674         | 0.404641  | 1        |
| cg27297221     | RNF126                                           | 9.20E-06             | 9.20E-06         | 5.16849        | 5.16849              | M up vs W                          | 189.054        | 7.48758         | 0.237634  | 1        |
| cg08899504     | KIF1B;KIF1B                                      | 1.05E-05             | 1.05E-05         | 6.15337        | 6.15337              | M up vs W                          | 180.446        | 9.16215         | 0.304651  | 1        |



| Probeset ID | UCSC_REFGENE_NAME                                                     | p-value(H3.3 Status) | p-value(M vs. W) | Ratio(M vs. W) | Fold-Change(M vs. W) | Fold-Change(M vs. W) (Description) | F(H3.3 Status) | SS(H3.3 Status) | SS(Error) | F(Error) |
|-------------|-----------------------------------------------------------------------|----------------------|------------------|----------------|----------------------|------------------------------------|----------------|-----------------|-----------|----------|
| cg20010635  | CAMTA1                                                                | 1.54E-05             | 1.54E-05         | 0.166992       | -5.98832             | M down vs W                        | 158.241        | 8.89001         | 0.337082  | 1        |
| cg06342838  | SLC25A17                                                              | 2.46E-05             | 2.46E-05         | 0.170528       | -5.86415             | M down vs W                        | 134.667        | 8.68308         | 0.38687   | 1        |
| cg15636504  | MGST2                                                                 | 3.71E-05             | 3.71E-05         | 0.19899        | -5.02538             | M down vs W                        | 116.878        | 7.23377         | 0.371351  | 1        |
| cg00710972  | UCMA                                                                  | 3.50E-05             | 3.50E-05         | 6.97702        | 6.97702              | M up vs W                          | 119.235        | 10.4728         | 0.527001  | 1        |
| cg06792366  | ZC3H8                                                                 | 1.46E-05             | 1.46E-05         | 6.29434        | 6.29434              | M up vs W                          | 161.271        | 9.39202         | 0.349426  | 1        |
| cg01309726  | LOC100270710                                                          | 1.78E-05             | 1.78E-05         | 1.79E-14       | -5.60E+13            | M down vs W                        | 253.682        | 1668.68         | 32.8892   | 1        |
| cg05076631  | PGF;PGF                                                               | 9.66E-06             | 9.66E-06         | 20.5914        | 20.5914              | M up vs W                          | 185.964        | 25.3923         | 0.819263  | 1        |
| cg24608700  | IDE                                                                   | 1.64E-05             | 1.64E-05         | 0.12152        | -8.22913             | M down vs W                        | 155.083        | 12.3281         | 0.476962  | 1        |
| cg14346035  | PDP1;PDP1;PDP1;PDP1<br>SEPT9;SEPT9;SEPT9;SEPT9;SEP<br>T9;SEPT9        | 1.50E-05             | 1.50E-05         | 5.1451         | 5.1451               | M up vs W                          | 159.84         | 7.44629         | 0.279516  | 1        |
| cg19654743  | T9;SEPT9                                                              | 3.70E-05             | 3.70E-05         | 18.6549        | 18.6549              | M up vs W                          | 116.952        | 23.7612         | 1.21903   | 1        |
| cg00413097  | C1orf227                                                              | 2.56E-05             | 2.56E-05         | 8.24923        | 8.24923              | M up vs W                          | 132.957        | 12.3567         | 0.557627  | 1        |
| cg22448677  | RNF6;RNF6;RNF6                                                        | 2.63E-05             | 2.63E-05         | 5.63623        | 5.63623              | M up vs W                          | 131.604        | 8.29825         | 0.378327  | 1        |
| cg16765068  | KCTD5                                                                 | 1.59E-05             | 1.59E-05         | 0.136506       | -7.32571             | M down vs W                        | 156.824        | 11.0053         | 0.421056  | 1        |
| cg09010748  | TOMM20                                                                | 9.16E-06             | 9.16E-06         | 6.52246        | 6.52246              | M up vs W                          | 189.37         | 9.75903         | 0.309206  | 1        |
| cg22823821  | MIR377                                                                | 1.67E-05             | 1.67E-05         | 0.0157711      | -63.407              | M down vs W                        | 153.917        | 47.7854         | 1.86277   | 1        |
| cg00184876  | CCDC46                                                                | 8.00E-05             | 8.00E-05         | 0.100303       | -9.96976             | M down vs W                        | 89.2468        | 14.6749         | 0.986585  | 1        |
| cg04356090  | SLC15A4                                                               | 5.74E-05             | 5.74E-05         | 0.0729155      | -13.7145             | M down vs W                        | 100.344        | 19.0273         | 1.13773   | 1        |
| cg09939854  | GRID1                                                                 | 7.98E-05             | 7.98E-05         | 5.85889        | 5.85889              | M up vs W                          | 89.3342        | 8.67426         | 0.582594  | 1        |
| cg04897621  | NR4A3;NR4A3;NR4A3                                                     | 1.92E-07             | 1.92E-07         | 29.7873        | 29.7873              | M up vs W                          | 700.981        | 31.9692         | 0.273639  | 1        |
| cg01104250  | CCDC102A                                                              | 3.13E-05             | 3.13E-05         | 8.08812        | 8.08812              | M up vs W                          | 123.948        | 12.1268         | 0.587026  | 1        |
| cg09222259  | SRRM2;LOC100128788                                                    | 3.60E-05             | 3.60E-05         | 7.89728        | 7.89728              | M up vs W                          | 118.052        | 11.8513         | 0.602344  | 1        |
| cg25963041  | ZFP28                                                                 | 2.21E-05             | 2.21E-05         | 0.170614       | -5.86118             | M down vs W                        | 139.746        | 8.67811         | 0.372594  | 1        |
| cg27409770  | URGC;UBE2D4;URGC                                                      | 1.64E-05             | 1.64E-05         | 5.1802         | 5.1802               | M up vs W                          | 154.883        | 7.50821         | 0.29086   | 1        |
| cg09709592  | AMDHD2;CEMP1                                                          | 2.06E-05             | 2.06E-05         | 0.170162       | -5.87674             | M down vs W                        | 143.36         | 8.70415         | 0.364291  | 1        |
| cg06277657  | DGKI                                                                  | 7.16E-05             | 7.16E-05         | 6.37317        | 6.37317              | M up vs W                          | 92.8382        | 9.51953         | 0.615234  | 1        |
| cg13508767  | FBRSL1                                                                | 1.07E-05             | 1.07E-05         | 6.32742        | 6.32742              | M up vs W                          | 179.503        | 9.44561         | 0.315725  | 1        |
| cg10196861  | SCNN1G                                                                | 1.93E-05             | 1.93E-05         | 0.178429       | -5.60447             | M down vs W                        | 146.503        | 8.24409         | 0.337635  | 1        |
| cg05345888  | ARHGEF11;MIR765;ARHGEF11                                              | 2.01E-05             | 2.01E-05         | 6.48797        | 6.48797              | M up vs W                          | 144.551        | 9.70393         | 0.402789  | 1        |
| cg15484161  | IRF2BP2;IRF2BP2                                                       | 2.97E-05             | 2.97E-05         | 1.72E+29       | 1.72E+29             | M up vs W                          | 1764           | 6287.81         | 10.6935   | 1        |
| cg19949959  | MIOX                                                                  | 4.27E-05             | 4.27E-05         | 5.23821        | 5.23821              | M up vs W                          | 111.239        | 7.61024         | 0.410482  | 1        |
| cg10581206  | INPP1;INPP1                                                           | 2.22E-05             | 2.22E-05         | 0.0995659      | -10.0436             | M down vs W                        | 139.707        | 14.7693         | 0.634295  | 1        |
| cg21012057  | MEM51                                                                 | 2.43E-05             | 2.43E-05         | 0.18998        | -5.2637              | M down vs W                        | 135.264        | 7.65492         | 0.339555  | 1        |
| cg19893077  | PLS1                                                                  | 1.58E-05             | 1.58E-05         | 0.15746        | -6.3508              | M down vs W                        | 156.966        | 9.48342         | 0.362501  | 1        |
| cg06017212  | SLC43A2                                                               | 3.69E-05             | 3.69E-05         | 7.20938        | 7.20938              | M up vs W                          | 117.093        | 10.8291         | 0.554894  | 1        |
| cg00746083  | CHD8;CHD8                                                             | 1.75E-05             | 1.75E-05         | 0.142254       | -7.02967             | M down vs W                        | 151.515        | 10.5541         | 0.417941  | 1        |
| cg21315629  | RALB                                                                  | 1.56E-05             | 1.56E-05         | 6.20153        | 6.20153              | M up vs W                          | 157.674        | 9.24094         | 0.351648  | 1        |
| cg12483476  | GRM6                                                                  | 2.58E-05             | 2.58E-05         | 5.02E+34       | 5.02E+34             | M up vs W                          | 478.716        | 9965.97         | 83.2725   | 1        |
| cg03698539  | DPEP3;DPEP3                                                           | 3.66E-05             | 3.66E-05         | 5.40484        | 5.40484              | M up vs W                          | 117.361        | 7.90078         | 0.403923  | 1        |
| cg26524638  | KCNQ1;KCNQ1                                                           | 2.68E-05             | 2.68E-05         | 0.17698        | -5.65035             | M down vs W                        | 130.744        | 8.32227         | 0.381919  | 1        |
| cg20984812  | METTL13;METTL13;METTL13                                               | 7.75E-05             | 7.75E-05         | 7.49993        | 7.49993              | M up vs W                          | 90.2668        | 11.2666         | 0.748886  | 1        |
| cg00948275  | HIST3H2BB;HIST3H2A                                                    | 2.44E-05             | 2.44E-05         | 414.728        | 414.728              | M up vs W                          | 492.127        | 56.7156         | 0.460983  | 1        |
| cg03310242  | FKBP4                                                                 | 1.77E-05             | 1.77E-05         | 6.87238        | 6.87238              | M up vs W                          | 150.858        | 10.3105         | 0.410077  | 1        |
| cg17499430  | LIN28                                                                 | 2.11E-05             | 2.11E-05         | 6.02267        | 6.02267              | M up vs W                          | 142.088        | 8.94692         | 0.377804  | 1        |
| cg11138231  | OR2AE1                                                                | 1.39E-05             | 1.39E-05         | 6.7196         | 6.7196               | M up vs W                          | 164.098        | 10.0714         | 0.368246  | 1        |
| cg25002044  | VTI1B;VTI1B                                                           | 2.23E-05             | 2.23E-05         | 6.42681        | 6.42681              | M up vs W                          | 139.468        | 9.60587         | 0.413249  | 1        |
| cg27180268  | DDX52;DDX52                                                           | 2.21E-05             | 2.21E-05         | 5.41489        | 5.41489              | M up vs W                          | 139.848        | 7.91818         | 0.339719  | 1        |
| cg26212303  | DLL4                                                                  | 2.69E-05             | 2.69E-05         | 5.44735        | 5.44735              | M up vs W                          | 130.73         | 7.97432         | 0.365991  | 1        |
| cg25279778  | GJB3;GJB3                                                             | 2.42E-05             | 2.42E-05         | 0.15785        | -6.33514             | M down vs W                        | 135.504        | 9.4581          | 0.418797  | 1        |
| cg03593358  | MFN2;MFN2                                                             | 2.70E-05             | 2.70E-05         | 9.70664        | 9.70664              | M up vs W                          | 130.458        | 14.3355         | 0.659316  | 1        |
| cg09871471  | LOC647121                                                             | 5.55E-05             | 5.55E-05         | 8.70474        | 8.70474              | M up vs W                          | 101.49         | 12.9942         | 0.768203  | 1        |
| cg13390743  | DSEL                                                                  | 2.57E-05             | 2.57E-05         | 5.3288         | 5.3288               | M up vs W                          | 132.8          | 7.76864         | 0.350992  | 1        |
| cg15290848  | GSTA2                                                                 | 3.11E-05             | 3.11E-05         | 6.71951        | 6.71951              | M up vs W                          | 124.217        | 10.0713         | 0.48647   | 1        |
| cg09558961  | RUFY2;RUFY2                                                           | 5.25E-05             | 5.25E-05         | 4.96085        | 4.96085              | M up vs W                          | 103.498        | 7.11843         | 0.41267   | 1        |
| cg01779076  | CFLAR;CFLAR                                                           | 1.21E-05             | 1.21E-05         | 8.67045        | 8.67045              | M up vs W                          | 172.072        | 12.9468         | 0.451444  | 1        |
| cg10236987  | WNT9A                                                                 | 5.44E-05             | 5.44E-05         | 5.63794        | 5.63794              | M up vs W                          | 102.226        | 8.30115         | 0.487224  | 1        |
| cg18023401  | ZNF572                                                                | 1.77E-05             | 1.77E-05         | 5.78907        | 5.78907              | M up vs W                          | 151.113        | 8.55703         | 0.339761  | 1        |
| cg04807025  | CSNK2A1P;GALNTL4                                                      | 4.90E-05             | 4.90E-05         | 0.19676        | -5.08233             | M down vs W                        | 106.063        | 7.3351          | 0.41495   | 1        |
| cg07814629  | MCRS1                                                                 | 3.69E-05             | 3.69E-05         | 1.89E+16       | 1.89E+16             | M up vs W                          | 399.736        | 2192.35         | 21.938    | 1        |
| cg19121055  | DGCR6L                                                                | 1.84E-05             | 1.84E-05         | 6.67051        | 6.67051              | M up vs W                          | 148.942        | 9.99404         | 0.4026    | 1        |
| cg26459339  | PIP4K2C;PIP4K2C;PIP4K2C;PIP4<br>K2C                                   | 3.11E-05             | 3.11E-05         | 5.16859        | 5.16859              | M up vs W                          | 124.244        | 7.48776         | 0.361601  | 1        |
| cg19391239  | TMEM87A;TMEM87A;GANC                                                  | 2.61E-05             | 2.61E-05         | 10.235         | 10.235               | M up vs W                          | 131.982        | 15.0119         | 0.682452  | 1        |
| cg20087776  | SCFD1;SCFD1                                                           | 5.50E-05             | 5.50E-05         | 6.26304        | 6.26304              | M up vs W                          | 101.809        | 9.34118         | 0.550511  | 1        |
| cg17980610  | GYLT1B                                                                | 2.58E-05             | 2.58E-05         | 7.05954        | 7.05954              | M up vs W                          | 132.63         | 10.6            | 0.479529  | 1        |
| cg01512638  | SNORD12B;C20orf199;SNORD1<br>2C;MIR1259;C20orf199;ZNF11;<br>C20orf199 | 5.52E-05             | 5.52E-05         | 4.76461        | 4.76461              | M up vs W                          | 101.718        | 6.76416         | 0.398996  | 1        |
| cg14162806  | PDGFB                                                                 | 1.89E-05             | 1.89E-05         | 7.06078        | 7.06078              | M up vs W                          | 147.633        | 10.6019         | 0.430876  | 1        |
| cg25018403  | THBS2                                                                 | 3.86E-05             | 3.86E-05         | 5.81286        | 5.81286              | M up vs W                          | 184.907        | 5.15823         | 0.139482  | 1        |
| cg18132007  | TP53H1;TP53H1                                                         | 2.93E-05             | 2.93E-05         | 9.41063        | 9.41063              | M up vs W                          | 126.805        | 13.9475         | 0.659949  | 1        |
| cg25340515  | EIF5A;EIF5A;EIF5A;EIF5A                                               | 4.88E-05             | 4.88E-05         | 0.14813        | -6.75085             | M down vs W                        | 106.204        | 10.1205         | 0.571762  | 1        |
| cg19370054  | CNGA3;CNGA3                                                           | 1.38E-05             | 1.38E-05         | 8.7708         | 8.7708               | M up vs W                          | 164.538        | 13.0851         | 0.47716   | 1        |



| Probeset ID | UCSC_REFGENE_NAME                      | p-value(H3.3 Status) | p-value(M vs. W) | Ratio(M vs. W) | Fold-Change(M vs. W) | Fold-Change(M vs. W) (Description) | F(H3.3 Status) | SS(H3.3 Status) | SS(Error) | F(Error) |
|-------------|----------------------------------------|----------------------|------------------|----------------|----------------------|------------------------------------|----------------|-----------------|-----------|----------|
| cg18489475  | ZC3H4                                  | 6.69E-05             | 6.69E-05         | 19.4276        | 19.4276              | M up vs W                          | 95.0622        | 24.425          | 1.54162   | 1        |
| cg03920233  | DOC2A                                  | 2.02E-05             | 2.02E-05         | 0.0979308      | -10.2113             | M down vs W                        | 144.378        | 14.982          | 0.622616  | 1        |
| cg22189307  | VWVE                                   | 6.83E-05             | 6.83E-05         | 6.03379        | 6.03379              | M up vs W                          | 94.3735        | 8.96532         | 0.569989  | 1        |
| cg23506135  | RDBP                                   | 6.11E-05             | 6.11E-05         | 0.209999       | -4.76192             | M down vs W                        | 98.1163        | 6.75926         | 0.413342  | 1        |
| cg00437134  | HSPE1;HSPE1;HSPD1;HSPD1                | 8.84E-05             | 8.84E-05         | 5.41465        | 5.41465              | M up vs W                          | 86.1611        | 7.91777         | 0.55137   | 1        |
| cg13104128  | CPZ;CPZ;CPZ                            | 4.99E-05             | 4.99E-05         | 10.7073        | 10.7073              | M up vs W                          | 105.387        | 15.6            | 0.88815   | 1        |
| cg02201012  | STK32B                                 | 7.45E-05             | 7.45E-05         | 6.24785        | 6.24785              | M up vs W                          | 91.5322        | 9.31646         | 0.610701  | 1        |
| cg16989117  | COL9A2                                 | 5.00E-05             | 5.00E-05         | 6.19406        | 6.19406              | M up vs W                          | 105.305        | 9.22874         | 0.525829  | 1        |
| cg18384277  | LTB;LTB                                | 7.81E-05             | 7.81E-05         | 5.71335        | 5.71335              | M up vs W                          | 90.0232        | 8.42918         | 0.5618    | 1        |
| cg16874185  | GDPD5                                  | 4.80E-05             | 4.80E-05         | 5.78345        | 5.78345              | M up vs W                          | 106.822        | 8.54756         | 0.480099  | 1        |
| cg11917481  | C12orf35                               | 5.02E-05             | 5.02E-05         | 0.111252       | -8.98858             | M down vs W                        | 105.105        | 13.3824         | 0.763943  | 1        |
| cg06576010  | CORO7                                  | 4.13E-05             | 4.13E-05         | 9.18494        | 9.18494              | M up vs W                          | 112.539        | 13.6471         | 0.727596  | 1        |
| cg14808329  | PHF15                                  | 6.62E-05             | 6.62E-05         | 9.43289        | 9.43289              | M up vs W                          | 95.4214        | 13.9769         | 0.878856  | 1        |
| cg26396535  | MEX3A                                  | 5.54E-05             | 5.54E-05         | 7.30875        | 7.30875              | M up vs W                          | 101.569        | 10.9797         | 0.648605  | 1        |
| cg25624478  | NFASC;NFASC;NFASC;NFASC                | 3.59E-05             | 3.59E-05         | 0.14538        | -6.87853             | M down vs W                        | 118.178        | 10.3201         | 0.52396   | 1        |
| cg23732368  | SLC25A20;SLC25A20                      | 8.27E-05             | 8.27E-05         | 9.49079        | 9.49079              | M up vs W                          | 88.2258        | 14.0533         | 0.955724  | 1        |
| cg16740746  | WVVOX;WVVOX                            | 6.55E-05             | 6.55E-05         | 5.22215        | 5.22215              | M up vs W                          | 95.7986        | 7.58203         | 0.474873  | 1        |
| cg11387577  | SHPRH;SHPRH                            | 7.01E-05             | 7.01E-05         | 6.10847        | 6.10847              | M up vs W                          | 93.5243        | 9.08844         | 0.583064  | 1        |
| cg07680129  | FGFR3;FGFR3;FGFR3                      | 4.78E-05             | 4.78E-05         | 0.23819        | -4.19833             | M down vs W                        | 106.943        | 5.71218         | 0.320479  | 1        |
| cg02531506  | JAM3                                   | 7.17E-05             | 7.17E-05         | 0.154552       | -6.4703              | M down vs W                        | 92.7894        | 9.67565         | 0.625652  | 1        |
| cg16040953  | KIAA1908;KIAA1908;PSMG3;KIAA1908;PSMG3 | 7.20E-05             | 7.20E-05         | 0.128571       | -7.77782             | M down vs W                        | 92.6349        | 11.6771         | 0.756332  | 1        |
| cg14007694  | 56                                     | 8.28E-05             | 8.28E-05         | 0.102389       | -9.76668             | M down vs W                        | 88.1971        | 14.4134         | 0.980539  | 1        |
| cg24083702  | MIA                                    | 4.24E-05             | 4.24E-05         | 0.0111911      | -89.3564             | M down vs W                        | 111.521        | 56.0131         | 3.01359   | 1        |
| cg18466911  | SYNGAP1                                | 8.55E-05             | 8.55E-05         | 6.75834        | 6.75834              | M up vs W                          | 87.1825        | 10.1323         | 0.697316  | 1        |
| cg03847924  | DET1;DET1;DET1                         | 7.16E-05             | 7.16E-05         | 7.10688        | 7.10688              | M up vs W                          | 92.8254        | 10.6726         | 0.689851  | 1        |
| cg04140906  | PSMA4;PSMA4;PSMA4                      | 8.42E-05             | 8.42E-05         | 13.4058        | 13.4058              | M up vs W                          | 87.6712        | 18.6979         | 1.27964   | 1        |
| cg23004031  | MGMT                                   | 5.73E-05             | 5.73E-05         | 4.21E-08       | -2.38E+07            | M down vs W                        | 100.397        | 800.525         | 47.8414   | 1        |
| cg00608467  | PPARA;PPARA                            | 5.25E-05             | 5.25E-05         | 0.122528       | -8.16142             | M down vs W                        | 103.501        | 12.2317         | 0.709074  | 1        |
| cg25597060  | MICAL3;MICAL3                          | 7.86E-05             | 7.86E-05         | 0.156847       | -6.37565             | M down vs W                        | 89.816         | 9.52353         | 0.636203  | 1        |
| cg15642326  | MARK4                                  | 7.49E-05             | 7.49E-05         | 0.173196       | -5.77382             | M down vs W                        | 91.3729        | 8.53133         | 0.560209  | 1        |
| cg26335281  | REEP2;REEP2                            | 8.77E-05             | 8.77E-05         | 0.149803       | -6.67544             | M down vs W                        | 86.4234        | 10.0018         | 0.694384  | 1        |
| cg25377605  | RP1L1                                  | 6.34E-05             | 6.34E-05         | 7.74845        | 7.74845              | M up vs W                          | 96.8972        | 11.6341         | 0.720398  | 1        |
| cg27193735  | CDK14                                  | 7.14E-05             | 7.14E-05         | 0.105208       | -9.50496             | M down vs W                        | 92.9341        | 14.0719         | 0.908508  | 1        |
| cg27070385  | GOT1                                   | 8.41E-05             | 8.41E-05         | 9.03332        | 9.03332              | M up vs W                          | 134.238        | 13.443          | 0.500715  | 1        |
| cg04136699  | PTPRN2;PTPRN2;PTPRN2                   | 6.86E-05             | 6.86E-05         | 11.3747        | 11.3747              | M up vs W                          | 94.24          | 16.4058         | 1.04451   | 1        |
| cg00352663  | NRXN2;NRXN2                            | 3.32E-05             | 3.32E-05         | 0.146784       | -6.81272             | M down vs W                        | 121.497        | 10.2175         | 0.50458   | 1        |
| cg00402617  | YWHAZ;YWHAZ;YWHAZ;YWHAZ                | 2.10E-05             | 2.10E-05         | 0.139502       | -7.16836             | M down vs W                        | 236.8          | 10.7666         | 0.227335  | 1        |
| cg00441136  | KIF3B                                  | 1.04E-06             | 1.04E-06         | 0.205853       | -4.85784             | M down vs W                        | 396.564        | 6.93312         | 0.104898  | 1        |
| cg00558147  | TAPBP;TAPBP;TAPBP                      | 5.06E-06             | 5.06E-06         | 0.196542       | -5.08798             | M down vs W                        | 231.862        | 7.34513         | 0.190074  | 1        |
| cg00558315  | ZDHHCT7;ZDHHCT7                        | 2.50E-05             | 2.50E-05         | 0.121834       | -8.20791             | M down vs W                        | 134.077        | 12.2979         | 0.550338  | 1        |
| cg00716787  | IMP4;CCDC115                           | 1.44E-05             | 1.44E-05         | 0.200547       | -4.98635             | M down vs W                        | 162.252        | 7.16407         | 0.264924  | 1        |
| cg00721819  | TNXB                                   | 1.03E-06             | 1.03E-06         | 0.172172       | -5.80816             | M down vs W                        | 398.489        | 5.8914          | 0.129326  | 1        |
| cg00783706  | ZC3H3                                  | 2.62E-05             | 2.62E-05         | 6.67806        | 6.67806              | M up vs W                          | 131.926        | 10.006          | 0.455072  | 1        |
| cg00794529  | PHF7;PHF7;PHF7;BAP1;PHF7               | 1.39E-05             | 1.39E-05         | 0.170154       | -5.87704             | M down vs W                        | 164.185        | 8.70464         | 0.318105  | 1        |
| cg00855479  | VPS13D;VPS13D                          | 2.14E-06             | 2.14E-06         | 0.150204       | -6.6576              | M down vs W                        | 310.685        | 9.97365         | 0.192613  | 1        |
| cg00861669  | GALNT7                                 | 7.69E-05             | 7.69E-05         | 0.167503       | -5.97004             | M down vs W                        | 90.5201        | 8.85966         | 0.58725   | 1        |
| cg01566393  | POFUT2;POFUT2;POFUT2                   | 4.67E-05             | 4.67E-05         | 0.0815916      | -12.2562             | M down vs W                        | 107.862        | 17.4285         | 0.969492  | 1        |
| cg01574241  | UCK2                                   | 2.92E-06             | 2.92E-06         | 0.0948699      | -10.5408             | M down vs W                        | 279.596        | 15.3944         | 0.330356  | 1        |
| cg01722695  | SCYL3;SCYL3                            | 2.03E-05             | 2.03E-05         | 0.121528       | -8.22854             | M down vs W                        | 144.041        | 12.3273         | 0.513492  | 1        |
| cg01774310  | C1RL;LOC283314                         | 2.35E-05             | 2.35E-05         | 0.156965       | -6.37086             | M down vs W                        | 136.969        | 9.5158          | 0.416843  | 1        |
| cg01777765  | MRPS34;NME3;EME2                       | 5.06E-07             | 5.06E-07         | 0.191548       | -5.22062             | M down vs W                        | 505.808        | 7.57935         | 0.0899078 | 1        |
| cg01802117  | SCP2;SCP2                              | 5.30E-08             | 5.30E-08         | 0.191396       | -5.22476             | M down vs W                        | 1078.67        | 7.58661         | 0.0421998 | 1        |
| cg01829407  | NAA11                                  | 2.89E-06             | 2.89E-06         | 0.105615       | -9.46838             | M down vs W                        | 280.603        | 14.0238         | 0.299863  | 1        |
| cg01890546  | UNC84A;UNC84A                          | 2.96E-05             | 2.96E-05         | 6.26329        | 6.26329              | M up vs W                          | 126.328        | 9.34159         | 0.443684  | 1        |
| cg01956386  | STK32B                                 | 5.33E-06             | 5.33E-06         | 0.133943       | -7.46585             | M down vs W                        | 227.864        | 11.2157         | 0.295326  | 1        |
| cg02281577  | ABHD2;ABHD2                            | 2.10E-05             | 2.10E-05         | 0.16731        | -5.97695             | M down vs W                        | 142.419        | 8.87113         | 0.373734  | 1        |
| cg02320355  | ASAP2;ASAP2                            | 1.86E-05             | 1.86E-05         | 5.57314        | 5.57314              | M up vs W                          | 148.451        | 8.19056         | 0.331042  | 1        |
| cg02344895  | NOTO                                   | 2.12E-06             | 2.12E-06         | 0.179908       | -5.55839             | M down vs W                        | 311.824        | 8.1653          | 0.157114  | 1        |
| cg02483911  | C17orf85;C17orf85                      | 3.31E-05             | 3.31E-05         | 0.111221       | -8.99109             | M down vs W                        | 121.515        | 13.3858         | 0.660947  | 1        |
| cg02706653  | PCSK2                                  | 8.88E-06             | 8.88E-06         | 0.194708       | -5.13589             | M down vs W                        | 191.35         | 7.42999         | 0.232975  | 1        |
| cg02817354  | TMT3C3;CEP290;CEP290                   | 9.93E-06             | 9.93E-06         | 0.161577       | -6.189               | M down vs W                        | 184.178        | 9.22047         | 0.300377  | 1        |
| cg02902969  | DIP2C                                  | 8.97E-06             | 8.97E-06         | 5.03162        | 5.03162              | M up vs W                          | 190.718        | 7.24489         | 0.227925  | 1        |
| cg03097582  | SBK1                                   | 1.05E-06             | 1.05E-06         | 0.203964       | -4.90282             | M down vs W                        | 395.69         | 7.01422         | 0.106359  | 1        |
| cg03155233  | MYO18A;MYO18A                          | 2.77E-05             | 2.77E-05         | 0.161556       | -6.18982             | M down vs W                        | 129.268        | 9.22181         | 0.428031  | 1        |
| cg03289369  | AASDH                                  | 3.01E-08             | 3.01E-08         | 0.182032       | -5.49354             | M down vs W                        | 1304.14        | 8.05396         | 0.0370541 | 1        |
| cg03309838  | SLC25A17                               | 1.06E-06             | 1.06E-06         | 4.55102        | 4.55102              | M up vs W                          | 393.79         | 6.37257         | 0.097096  | 1        |
| cg03321231  | RPH3AL                                 | 2.45E-06             | 2.45E-06         | 0.162298       | -6.16152             | M down vs W                        | 296.812        | 9.17551         | 0.185481  | 1        |
| cg03371986  | CTNNA1                                 | 1.11E-05             | 1.11E-05         | 0.168725       | -5.92681             | M down vs W                        | 177.52         | 8.78774         | 0.297017  | 1        |
| cg03493509  | CGGBP1;CGGBP1                          | 1.51E-06             | 1.51E-06         | 0.188266       | -5.31164             | M down vs W                        | 349.615        | 7.73871         | 0.13281   | 1        |
| cg03534196  | DPH5;DPH5;DPH5                         | 3.91E-06             | 3.91E-06         | 0.17615        | -5.67698             | M down vs W                        | 253.287        | 8.36753         | 0.198214  | 1        |







| Probeset ID | UCSC_REFGENE_NAME               | p-value(H3.3 Status) | p-value(M vs. W) | Ratio(M vs. W) | Fold-Change(M vs. W) | Fold-Change(M vs. W) (Description) | F(H3.3 Status) | SS(H3.3 Status) | SS(Error) | F(Error) |
|-------------|---------------------------------|----------------------|------------------|----------------|----------------------|------------------------------------|----------------|-----------------|-----------|----------|
| cg23520889  | PACS2;PACS2                     | 1.87E-05             | 1.87E-05         | 6.53514        | 6.53514              | M up vs W                          | 148.292        | 9.77925         | 0.395675  | 1        |
| cg23727007  | LOC285830;LOC285830             | 5.01E-06             | 5.01E-06         | 0.184299       | -5.42597             | M down vs W                        | 232.658        | 7.93736         | 0.204696  | 1        |
| cg23886378  | GLCC1                           | 4.40E-06             | 4.40E-06         | 6.01637        | 6.01637              | M up vs W                          | 243.183        | 8.93649         | 0.220488  | 1        |
| cg23996948  | NFIA;NFIA;NFIA;NFIA             | 4.71E-05             | 4.71E-05         | 10.0048        | 10.0048              | M up vs W                          | 107.472        | 14.7198         | 0.821786  | 1        |
| cg24237862  | ELMO1;ELMO1                     | 7.62E-07             | 7.62E-07         | 7.51911        | 7.51911              | M up vs W                          | 440.541        | 11.2952         | 0.153836  | 1        |
| cg24252029  | TMCO3                           | 3.38E-08             | 3.38E-08         | 5.08436        | 5.08436              | M up vs W                          | 1253.98        | 7.33871         | 0.0351141 | 1        |
| cg24291490  | SIAH3                           | 2.96E-06             | 2.96E-06         | 5.51951        | 5.51951              | M up vs W                          | 278.412        | 8.09862         | 0.174531  | 1        |
| cg24506574  | GOLIM4                          | 1.58E-06             | 1.58E-06         | 0.198338       | -5.04191             | M down vs W                        | 344.349        | 7.26322         | 0.126556  | 1        |
| cg24845165  | LPIN3                           | 7.89E-05             | 7.89E-05         | 0.175081       | -5.71165             | M down vs W                        | 89.6944        | 8.4263          | 0.563667  | 1        |
| cg24892871  | KEAP1;KEAP1                     | 1.26E-07             | 1.26E-07         | 0.214814       | -4.65519             | M down vs W                        | 807.567        | 6.56434         | 0.0487713 | 1        |
| cg24924930  | KIF1A                           | 3.57E-05             | 3.57E-05         | 0.0521062      | -19.1916             | M down vs W                        | 118.401        | 24.2241         | 1.22756   | 1        |
| cg25149428  | MAPKAPK3                        | 3.73E-07             | 3.73E-07         | 5.19184        | 5.19184              | M up vs W                          | 560.338        | 7.52872         | 0.0806163 | 1        |
| cg25310241  | DSCAM                           | 6.87E-09             | 6.87E-09         | 0.126696       | -7.89293             | M down vs W                        | 2136.28        | 11.845          | 0.033268  | 1        |
| cg25365221  | DDX42;CCDC47;DDX42              | 3.87E-09             | 3.87E-09         | 4.52102        | 4.52102              | M up vs W                          | 2588.08        | 6.31707         | 0.014645  | 1        |
| cg25489413  | ZMIZ2;ZMIZ2                     | 5.75E-07             | 5.75E-07         | 5.23185        | 5.23185              | M up vs W                          | 484.266        | 7.59907         | 0.0941516 | 1        |
| cg25563087  | DHRS7                           | 6.10E-05             | 6.10E-05         | 0.181533       | -5.50865             | M down vs W                        | 98.1821        | 8.07995         | 0.493773  | 1        |
| cg26015190  | ANKRD12;ANKRD12                 | 2.07E-06             | 2.07E-06         | 5.43804        | 5.43804              | M up vs W                          | 314.233        | 7.95823         | 0.151955  | 1        |
| cg26077133  | MSRA;MSRA;MSRA                  | 4.30E-05             | 4.30E-05         | 6.26377        | 6.26377              | M up vs W                          | 110.997        | 9.34237         | 0.505005  | 1        |
| cg26135506  | HTR7                            | 4.72E-05             | 4.72E-05         | 0.141319       | -7.07618             | M down vs W                        | 107.468        | 10.6256         | 0.593228  | 1        |
| cg26143141  | SORCS2                          | 4.87E-07             | 4.87E-07         | 4.62325        | 4.62325              | M up vs W                          | 512.288        | 6.5057          | 0.0761957 | 1        |
| cg26188814  | MAEA;MAEA                       | 4.47E-06             | 4.47E-06         | 0.185877       | -5.3799              | M down vs W                        | 241.839        | 7.85751         | 0.194944  | 1        |
| cg26375587  | BOC                             | 2.07E-06             | 2.07E-06         | 8.44248        | 8.44248              | M up vs W                          | 314.091        | 12.6294         | 0.241255  | 1        |
| cg26466856  | ISPD;ISPD                       | 8.63E-08             | 8.63E-08         | 5.80313        | 5.80313              | M up vs W                          | 916.286        | 8.58069         | 0.0561879 | 1        |
| cg26486702  | USP21;USP21;USP21;USP21         | 2.02E-07             | 2.02E-07         | 0.218522       | -4.57621             | M down vs W                        | 689.045        | 6.41907         | 0.0558954 | 1        |
| cg26638570  | BAHCC1                          | 8.43E-05             | 8.43E-05         | 0.162529       | -6.15273             | M down vs W                        | 87.639         | 9.16111         | 0.627194  | 1        |
| cg26780013  | MFAP3L                          | 2.64E-06             | 2.64E-06         | 0.200603       | -4.98497             | M down vs W                        | 289.332        | 7.1616          | 0.148513  | 1        |
| cg26860507  | GPRC5D                          | 2.46E-05             | 2.46E-05         | 0.161645       | -6.18639             | M down vs W                        | 134.831        | 9.21621         | 0.410123  | 1        |
| cg27004850  | PTPRN2;PTPRN2;PTPRN2            | 2.91E-05             | 2.91E-05         | 0.157483       | -6.34988             | M down vs W                        | 127.087        | 9.48193         | 0.447666  | 1        |
| cg27224751  | DNAJC17                         | 3.57E-06             | 3.57E-06         | 0.135095       | -7.40219             | M down vs W                        | 261.049        | 11.1204         | 0.255592  | 1        |
| cg27312944  | 6                               | 7.45E-05             | 7.45E-05         | 11.7395        | 11.7395              | M up vs W                          | 954.102        | 8.41728         | 0.0264666 | 1        |
| cg27431247  | CHKA;CHKA                       | 7.03E-07             | 7.03E-07         | 8.07993        | 8.07993              | M up vs W                          | 452.725        | 12.115          | 0.160561  | 1        |
| cg27511528  | POLR2J4                         | 8.38E-05             | 8.38E-05         | 0.132128       | -7.56841             | M down vs W                        | 87.798         | 11.3685         | 0.776906  | 1        |
| cg27660248  | LOC100130872;LOC100130872-SPON2 | 1.68E-06             | 1.68E-06         | 0.164455       | -6.08069             | M down vs W                        | 337.461        | 9.04272         | 0.160778  | 1        |
